# Supplementary material
Source: PubMed Central journal article supplement (PMC4316747)
Supplement: NIHMS582975-supplement-1.pdf [file NIHMS582975-supplement-1.pdf]

|    |     |   |   |   |   |   |
|----|-----|---|---|---|---|---|
| 12 | 25  | 1 | 0 | 0 | 0 | 0 |
| 14 | 15  | 1 | 0 | 0 | 0 | 0 |
| 14 | 23  | 2 | 0 | 0 | 0 | 0 |
| 14 | 61  | 1 | 0 | 0 | 0 | 0 |
| 15 | 16  | 1 | 0 | 0 | 0 | 0 |
| 15 | 17  | 2 | 0 | 0 | 0 | 0 |
| 17 | 18  | 1 | 0 | 0 | 0 | 0 |
| 17 | 19  | 1 | 0 | 0 | 0 | 0 |
| 19 | 20  | 1 | 0 | 0 | 0 | 0 |
| 19 | 21  | 2 | 0 | 0 | 0 | 0 |
| 21 | 22  | 1 | 0 | 0 | 0 | 0 |
| 21 | 23  | 1 | 0 | 0 | 0 | 0 |
| 23 | 24  | 1 | 0 | 0 | 0 | 0 |
| 25 | 26  | 1 | 0 | 0 | 0 | 0 |
| 25 | 27  | 1 | 0 | 0 | 0 | 0 |
| 25 | 28  | 1 | 0 | 0 | 0 | 0 |
| 28 | 29  | 1 | 0 | 0 | 0 | 0 |
| 28 | 30  | 1 | 0 | 0 | 0 | 0 |
| 28 | 31  | 1 | 0 | 0 | 0 | 0 |
| 31 | 32  | 1 | 0 | 0 | 0 | 0 |
| 31 | 48  | 2 | 0 | 0 | 0 | 0 |
| 32 | 33  | 1 | 0 | 0 | 0 | 0 |
| 33 | 34  | 1 | 0 | 0 | 0 | 0 |
| 33 | 35  | 1 | 0 | 0 | 0 | 0 |
| 33 | 36  | 1 | 0 | 0 | 0 | 0 |
| 36 | 37  | 1 | 0 | 0 | 0 | 0 |
| 36 | 50  | 1 | 0 | 0 | 0 | 0 |
| 36 | 53  | 1 | 0 | 0 | 0 | 0 |
| 37 | 38  | 1 | 0 | 0 | 0 | 0 |
| 37 | 39  | 1 | 0 | 0 | 0 | 0 |
| 37 | 40  | 1 | 0 | 0 | 0 | 0 |
| 40 | 41  | 1 | 0 | 0 | 0 | 0 |
| 41 | 42  | 1 | 0 | 0 | 0 | 0 |
| 41 | 49  | 2 | 0 | 0 | 0 | 0 |
| 42 | 43  | 1 | 0 | 0 | 0 | 0 |
| 42 | 44  | 1 | 0 | 0 | 0 | 0 |
| 42 | 45  | 1 | 0 | 0 | 0 | 0 |
| 45 | 46  | 1 | 0 | 0 | 0 | 0 |
| 45 | 47  | 1 | 0 | 0 | 0 | 0 |
| 45 | 74  | 1 | 0 | 0 | 0 | 0 |
| 50 | 51  | 1 | 0 | 0 | 0 | 0 |
| 50 | 52  | 1 | 0 | 0 | 0 | 0 |
| 50 | 56  | 1 | 0 | 0 | 0 | 0 |
| 53 | 54  | 1 | 0 | 0 | 0 | 0 |
| 53 | 55  | 1 | 0 | 0 | 0 | 0 |
| 53 | 60  | 1 | 0 | 0 | 0 | 0 |
| 56 | 57  | 1 | 0 | 0 | 0 | 0 |
| 56 | 58  | 1 | 0 | 0 | 0 | 0 |
| 56 | 59  | 1 | 0 | 0 | 0 | 0 |
| 60 | 61  | 1 | 0 | 0 | 0 | 0 |
| 61 | 62  | 2 | 0 | 0 | 0 | 0 |
| 63 | 64  | 1 | 0 | 0 | 0 | 0 |
| 63 | 65  | 1 | 0 | 0 | 0 | 0 |
| 65 | 66  | 1 | 0 | 0 | 0 | 0 |
| 65 | 67  | 1 | 0 | 0 | 0 | 0 |
| 65 | 68  | 1 | 0 | 0 | 0 | 0 |
| 68 | 69  | 1 | 0 | 0 | 0 | 0 |
| 68 | 70  | 1 | 0 | 0 | 0 | 0 |
| 68 | 71  | 1 | 0 | 0 | 0 | 0 |
| 71 | 72  | 1 | 0 | 0 | 0 | 0 |
| 71 | 73  | 1 | 0 | 0 | 0 | 0 |
| 71 | 74  | 1 | 0 | 0 | 0 | 0 |
| 74 | 86  | 1 | 0 | 0 | 0 | 0 |
| 75 | 76  | 1 | 0 | 0 | 0 | 0 |
| 75 | 84  | 2 | 0 | 0 | 0 | 0 |
| 75 | 122 | 1 | 0 | 0 | 0 | 0 |
| 76 | 77  | 1 | 0 | 0 | 0 | 0 |
| 76 | 78  | 2 | 0 | 0 | 0 | 0 |
| 78 | 79  | 1 | 0 | 0 | 0 | 0 |
| 78 | 80  | 1 | 0 | 0 | 0 | 0 |
| 80 | 81  | 1 | 0 | 0 | 0 | 0 |
| 80 | 82  | 2 | 0 | 0 | 0 | 0 |
| 82 | 83  | 1 | 0 | 0 | 0 | 0 |
| 82 | 84  | 1 | 0 | 0 | 0 | 0 |
| 84 | 85  | 1 | 0 | 0 | 0 | 0 |
| 86 | 87  | 1 | 0 | 0 | 0 | 0 |
| 86 | 88  | 1 | 0 | 0 | 0 | 0 |
| 86 | 89  | 1 | 0 | 0 | 0 | 0 |
| 89 | 90  | 1 | 0 | 0 | 0 | 0 |
| 89 | 91  | 1 | 0 | 0 | 0 | 0 |
| 89 | 92  | 1 | 0 | 0 | 0 | 0 |

|        |   |   |   |   |   |
|--------|---|---|---|---|---|
| 92 93  | 1 | 0 | 0 | 0 | 0 |
| 92109  | 2 | 0 | 0 | 0 | 0 |
| 93 94  | 1 | 0 | 0 | 0 | 0 |
| 94 95  | 1 | 0 | 0 | 0 | 0 |
| 94 96  | 1 | 0 | 0 | 0 | 0 |
| 94 97  | 1 | 0 | 0 | 0 | 0 |
| 97 98  | 1 | 0 | 0 | 0 | 0 |
| 97111  | 1 | 0 | 0 | 0 | 0 |
| 97114  | 1 | 0 | 0 | 0 | 0 |
| 98 99  | 1 | 0 | 0 | 0 | 0 |
| 98100  | 1 | 0 | 0 | 0 | 0 |
| 98101  | 1 | 0 | 0 | 0 | 0 |
| 101102 | 1 | 0 | 0 | 0 | 0 |
| 102103 | 1 | 0 | 0 | 0 | 0 |
| 102110 | 2 | 0 | 0 | 0 | 0 |
| 103104 | 1 | 0 | 0 | 0 | 0 |
| 103105 | 1 | 0 | 0 | 0 | 0 |
| 103106 | 1 | 0 | 0 | 0 | 0 |
| 106107 | 1 | 0 | 0 | 0 | 0 |
| 106108 | 1 | 0 | 0 | 0 | 0 |
| 106135 | 1 | 0 | 0 | 0 | 0 |
| 111112 | 1 | 0 | 0 | 0 | 0 |
| 111113 | 1 | 0 | 0 | 0 | 0 |
| 111117 | 1 | 0 | 0 | 0 | 0 |
| 114115 | 1 | 0 | 0 | 0 | 0 |
| 114116 | 1 | 0 | 0 | 0 | 0 |
| 114121 | 1 | 0 | 0 | 0 | 0 |
| 117118 | 1 | 0 | 0 | 0 | 0 |
| 117119 | 1 | 0 | 0 | 0 | 0 |
| 117120 | 1 | 0 | 0 | 0 | 0 |
| 121122 | 1 | 0 | 0 | 0 | 0 |
| 122123 | 2 | 0 | 0 | 0 | 0 |
| 124125 | 1 | 0 | 0 | 0 | 0 |
| 124126 | 1 | 0 | 0 | 0 | 0 |
| 126127 | 1 | 0 | 0 | 0 | 0 |
| 126128 | 1 | 0 | 0 | 0 | 0 |
| 126129 | 1 | 0 | 0 | 0 | 0 |
| 129130 | 1 | 0 | 0 | 0 | 0 |
| 129131 | 1 | 0 | 0 | 0 | 0 |
| 129132 | 1 | 0 | 0 | 0 | 0 |
| 132133 | 1 | 0 | 0 | 0 | 0 |
| 132134 | 1 | 0 | 0 | 0 | 0 |
| 132135 | 1 | 0 | 0 | 0 | 0 |
| 135147 | 1 | 0 | 0 | 0 | 0 |
| 136137 | 1 | 0 | 0 | 0 | 0 |
| 136145 | 2 | 0 | 0 | 0 | 0 |
| 136183 | 1 | 0 | 0 | 0 | 0 |
| 137138 | 1 | 0 | 0 | 0 | 0 |
| 137139 | 2 | 0 | 0 | 0 | 0 |
| 139140 | 1 | 0 | 0 | 0 | 0 |
| 139141 | 1 | 0 | 0 | 0 | 0 |
| 141142 | 1 | 0 | 0 | 0 | 0 |
| 141143 | 2 | 0 | 0 | 0 | 0 |
| 143144 | 1 | 0 | 0 | 0 | 0 |
| 143145 | 1 | 0 | 0 | 0 | 0 |
| 145146 | 1 | 0 | 0 | 0 | 0 |
| 147148 | 1 | 0 | 0 | 0 | 0 |
| 147149 | 1 | 0 | 0 | 0 | 0 |
| 147150 | 1 | 0 | 0 | 0 | 0 |
| 150151 | 1 | 0 | 0 | 0 | 0 |
| 150152 | 1 | 0 | 0 | 0 | 0 |
| 150153 | 1 | 0 | 0 | 0 | 0 |
| 153154 | 1 | 0 | 0 | 0 | 0 |
| 153170 | 2 | 0 | 0 | 0 | 0 |
| 154155 | 1 | 0 | 0 | 0 | 0 |
| 155156 | 1 | 0 | 0 | 0 | 0 |
| 155157 | 1 | 0 | 0 | 0 | 0 |
| 155158 | 1 | 0 | 0 | 0 | 0 |
| 158159 | 1 | 0 | 0 | 0 | 0 |
| 158172 | 1 | 0 | 0 | 0 | 0 |
| 158175 | 1 | 0 | 0 | 0 | 0 |
| 159160 | 1 | 0 | 0 | 0 | 0 |
| 159161 | 1 | 0 | 0 | 0 | 0 |
| 159162 | 1 | 0 | 0 | 0 | 0 |
| 162163 | 1 | 0 | 0 | 0 | 0 |
| 163164 | 1 | 0 | 0 | 0 | 0 |
| 163171 | 2 | 0 | 0 | 0 | 0 |
| 164165 | 1 | 0 | 0 | 0 | 0 |
| 164166 | 1 | 0 | 0 | 0 | 0 |
| 164167 | 1 | 0 | 0 | 0 | 0 |
| 167168 | 1 | 0 | 0 | 0 | 0 |

|        |   |   |   |   |   |
|--------|---|---|---|---|---|
| 167169 | 1 | 0 | 0 | 0 | 0 |
| 167196 | 1 | 0 | 0 | 0 | 0 |
| 172173 | 1 | 0 | 0 | 0 | 0 |
| 172174 | 1 | 0 | 0 | 0 | 0 |
| 172178 | 1 | 0 | 0 | 0 | 0 |
| 175176 | 1 | 0 | 0 | 0 | 0 |
| 175177 | 1 | 0 | 0 | 0 | 0 |
| 175182 | 1 | 0 | 0 | 0 | 0 |
| 178179 | 1 | 0 | 0 | 0 | 0 |
| 178180 | 1 | 0 | 0 | 0 | 0 |
| 178181 | 1 | 0 | 0 | 0 | 0 |
| 182183 | 1 | 0 | 0 | 0 | 0 |
| 183184 | 2 | 0 | 0 | 0 | 0 |
| 185186 | 1 | 0 | 0 | 0 | 0 |
| 185187 | 1 | 0 | 0 | 0 | 0 |
| 187188 | 1 | 0 | 0 | 0 | 0 |
| 187189 | 1 | 0 | 0 | 0 | 0 |
| 187190 | 1 | 0 | 0 | 0 | 0 |
| 190191 | 1 | 0 | 0 | 0 | 0 |
| 190192 | 1 | 0 | 0 | 0 | 0 |
| 190193 | 1 | 0 | 0 | 0 | 0 |
| 193194 | 1 | 0 | 0 | 0 | 0 |
| 193195 | 1 | 0 | 0 | 0 | 0 |
| 193196 | 1 | 0 | 0 | 0 | 0 |
| 196208 | 1 | 0 | 0 | 0 | 0 |
| 197198 | 1 | 0 | 0 | 0 | 0 |
| 197206 | 2 | 0 | 0 | 0 | 0 |
| 197244 | 1 | 0 | 0 | 0 | 0 |
| 198199 | 1 | 0 | 0 | 0 | 0 |
| 198200 | 2 | 0 | 0 | 0 | 0 |
| 200201 | 1 | 0 | 0 | 0 | 0 |
| 200202 | 1 | 0 | 0 | 0 | 0 |
| 202203 | 1 | 0 | 0 | 0 | 0 |
| 202204 | 2 | 0 | 0 | 0 | 0 |
| 204205 | 1 | 0 | 0 | 0 | 0 |
| 204206 | 1 | 0 | 0 | 0 | 0 |
| 206207 | 1 | 0 | 0 | 0 | 0 |
| 208209 | 1 | 0 | 0 | 0 | 0 |
| 208210 | 1 | 0 | 0 | 0 | 0 |
| 208211 | 1 | 0 | 0 | 0 | 0 |
| 211212 | 1 | 0 | 0 | 0 | 0 |
| 211213 | 1 | 0 | 0 | 0 | 0 |
| 211214 | 1 | 0 | 0 | 0 | 0 |
| 214215 | 1 | 0 | 0 | 0 | 0 |
| 214231 | 2 | 0 | 0 | 0 | 0 |
| 215216 | 1 | 0 | 0 | 0 | 0 |
| 216217 | 1 | 0 | 0 | 0 | 0 |
| 216218 | 1 | 0 | 0 | 0 | 0 |
| 216219 | 1 | 0 | 0 | 0 | 0 |
| 219220 | 1 | 0 | 0 | 0 | 0 |
| 219233 | 1 | 0 | 0 | 0 | 0 |
| 219236 | 1 | 0 | 0 | 0 | 0 |
| 220221 | 1 | 0 | 0 | 0 | 0 |
| 220222 | 1 | 0 | 0 | 0 | 0 |
| 220223 | 1 | 0 | 0 | 0 | 0 |
| 223224 | 1 | 0 | 0 | 0 | 0 |
| 224225 | 1 | 0 | 0 | 0 | 0 |
| 224232 | 2 | 0 | 0 | 0 | 0 |
| 225226 | 1 | 0 | 0 | 0 | 0 |
| 225227 | 1 | 0 | 0 | 0 | 0 |
| 225228 | 1 | 0 | 0 | 0 | 0 |
| 228229 | 1 | 0 | 0 | 0 | 0 |
| 228230 | 1 | 0 | 0 | 0 | 0 |
| 228257 | 1 | 0 | 0 | 0 | 0 |
| 233234 | 1 | 0 | 0 | 0 | 0 |
| 233235 | 1 | 0 | 0 | 0 | 0 |
| 233239 | 1 | 0 | 0 | 0 | 0 |
| 236237 | 1 | 0 | 0 | 0 | 0 |
| 236238 | 1 | 0 | 0 | 0 | 0 |
| 236243 | 1 | 0 | 0 | 0 | 0 |
| 239240 | 1 | 0 | 0 | 0 | 0 |
| 239241 | 1 | 0 | 0 | 0 | 0 |
| 239242 | 1 | 0 | 0 | 0 | 0 |
| 243244 | 1 | 0 | 0 | 0 | 0 |
| 244245 | 2 | 0 | 0 | 0 | 0 |
| 246247 | 1 | 0 | 0 | 0 | 0 |
| 246248 | 1 | 0 | 0 | 0 | 0 |
| 248249 | 1 | 0 | 0 | 0 | 0 |
| 248250 | 1 | 0 | 0 | 0 | 0 |
| 248251 | 1 | 0 | 0 | 0 | 0 |
| 251252 | 1 | 0 | 0 | 0 | 0 |

```

251253 1 0 0 0 0
251254 1 0 0 0 0
254255 1 0 0 0 0
254256 1 0 0 0 0
254257 1 0 0 0 0
257269 1 0 0 0 0
258259 1 0 0 0 0
258267 2 0 0 0 0
258306 1 0 0 0 0
259260 1 0 0 0 0
259261 2 0 0 0 0
261262 1 0 0 0 0
261263 1 0 0 0 0
263264 1 0 0 0 0
263265 2 0 0 0 0
265266 1 0 0 0 0
265267 1 0 0 0 0
267268 1 0 0 0 0
269270 1 0 0 0 0
269271 1 0 0 0 0
269272 1 0 0 0 0
272273 1 0 0 0 0
272274 1 0 0 0 0
272275 1 0 0 0 0
275276 1 0 0 0 0
275293 2 0 0 0 0
276277 1 0 0 0 0
277278 1 0 0 0 0
277279 1 0 0 0 0
277280 1 0 0 0 0
280281 1 0 0 0 0
280295 1 0 0 0 0
280298 1 0 0 0 0
281282 1 0 0 0 0
281283 1 0 0 0 0
281284 1 0 0 0 0
284285 1 0 0 0 0
285286 1 0 0 0 0
285294 2 0 0 0 0
286287 1 0 0 0 0
286288 1 0 0 0 0
286289 1 0 0 0 0
289290 1 0 0 0 0
289291 1 0 0 0 0
289292 1 0 0 0 0
295296 1 0 0 0 0
295297 1 0 0 0 0
295301 1 0 0 0 0
298299 1 0 0 0 0
298300 1 0 0 0 0
298305 1 0 0 0 0
301302 1 0 0 0 0
301303 1 0 0 0 0
301304 1 0 0 0 0
305306 1 0 0 0 0
306307 2 0 0 0 0

```

```

M END
> <NAME>
AA20_1

```

```

$$$$
AA24_1
MOE2012 3D

```

```

312316 0 0 1 0 0 0 0 0999 V2000
  9.2440 -13.8940 4.2250 O 0 0 0 0 0 0 0 0 0 0 0 0 0 0 0
  8.2940 -13.7400 4.3730 H 0 0 0 0 0 0 0 0 0 0 0 0 0 0 0
  9.8110 -12.6380 3.8460 C 0 0 0 0 0 0 0 0 0 0 0 0 0 0 0
  9.2930 -12.2580 2.9610 H 0 0 0 0 0 0 0 0 0 0 0 0 0 0 0
  9.6700 -11.9480 4.6830 H 0 0 0 0 0 0 0 0 0 0 0 0 0 0 0
  11.2950 -12.8740 3.5670 C 0 0 3 0 0 0 0 0 0 0 0 0 0 0 0
  11.4070 -13.5670 2.7240 H 0 0 0 0 0 0 0 0 0 0 0 0 0 0 0
  12.0360 -11.5570 3.3020 C 0 0 0 0 0 0 0 0 0 0 0 0 0 0 0
  11.5370 -11.0100 2.4940 H 0 0 0 0 0 0 0 0 0 0 0 0 0 0 0
  12.0040 -10.9460 4.2110 H 0 0 0 0 0 0 0 0 0 0 0 0 0 0 0
  13.4260 -11.8280 2.9270 N 0 0 3 0 0 0 0 0 0 0 0 0 0 0 0
  13.8630 -12.4020 3.6600 H 0 0 0 0 0 0 0 0 0 0 0 0 0 0 0
  11.8460 -13.5280 4.7210 O 0 0 0 0 0 0 0 0 0 0 0 0 0 0 0
  11.1710 -14.2030 4.9480 H 0 0 0 0 0 0 0 0 0 0 0 0 0 0 0
  19.3640 -14.1570 8.2130 C 0 0 0 0 0 0 0 0 0 0 0 0 0 0 0
  18.4540 -14.5570 7.2260 C 0 0 0 0 0 0 0 0 0 0 0 0 0 0 0

```











|     |     |   |   |   |   |   |
|-----|-----|---|---|---|---|---|
| 26  | 29  | 1 | 0 | 0 | 0 | 0 |
| 29  | 30  | 1 | 0 | 0 | 0 | 0 |
| 29  | 31  | 1 | 0 | 0 | 0 | 0 |
| 29  | 32  | 1 | 0 | 0 | 0 | 0 |
| 32  | 33  | 1 | 0 | 0 | 0 | 0 |
| 32  | 49  | 2 | 0 | 0 | 0 | 0 |
| 33  | 34  | 1 | 0 | 0 | 0 | 0 |
| 34  | 35  | 1 | 0 | 0 | 0 | 0 |
| 34  | 36  | 1 | 0 | 0 | 0 | 0 |
| 34  | 37  | 1 | 0 | 0 | 0 | 0 |
| 37  | 38  | 1 | 0 | 0 | 0 | 0 |
| 37  | 51  | 1 | 0 | 0 | 0 | 0 |
| 37  | 54  | 1 | 0 | 0 | 0 | 0 |
| 38  | 39  | 1 | 0 | 0 | 0 | 0 |
| 38  | 40  | 1 | 0 | 0 | 0 | 0 |
| 38  | 41  | 1 | 0 | 0 | 0 | 0 |
| 41  | 42  | 1 | 0 | 0 | 0 | 0 |
| 42  | 43  | 1 | 0 | 0 | 0 | 0 |
| 42  | 50  | 2 | 0 | 0 | 0 | 0 |
| 43  | 44  | 1 | 0 | 0 | 0 | 0 |
| 43  | 45  | 1 | 0 | 0 | 0 | 0 |
| 43  | 46  | 1 | 0 | 0 | 0 | 0 |
| 46  | 47  | 1 | 0 | 0 | 0 | 0 |
| 46  | 48  | 1 | 0 | 0 | 0 | 0 |
| 46  | 74  | 1 | 0 | 0 | 0 | 0 |
| 51  | 52  | 1 | 0 | 0 | 0 | 0 |
| 51  | 53  | 1 | 0 | 0 | 0 | 0 |
| 51  | 57  | 1 | 0 | 0 | 0 | 0 |
| 54  | 55  | 1 | 0 | 0 | 0 | 0 |
| 54  | 56  | 1 | 0 | 0 | 0 | 0 |
| 54  | 61  | 1 | 0 | 0 | 0 | 0 |
| 57  | 58  | 1 | 0 | 0 | 0 | 0 |
| 57  | 59  | 1 | 0 | 0 | 0 | 0 |
| 57  | 60  | 1 | 0 | 0 | 0 | 0 |
| 61  | 62  | 1 | 0 | 0 | 0 | 0 |
| 62  | 63  | 2 | 0 | 0 | 0 | 0 |
| 64  | 65  | 1 | 0 | 0 | 0 | 0 |
| 64  | 66  | 1 | 0 | 0 | 0 | 0 |
| 66  | 67  | 1 | 0 | 0 | 0 | 0 |
| 66  | 68  | 1 | 0 | 0 | 0 | 0 |
| 66  | 69  | 1 | 0 | 0 | 0 | 0 |
| 69  | 70  | 1 | 0 | 0 | 0 | 0 |
| 69  | 71  | 1 | 0 | 0 | 0 | 0 |
| 69  | 75  | 1 | 0 | 0 | 0 | 0 |
| 71  | 72  | 1 | 0 | 0 | 0 | 0 |
| 71  | 73  | 1 | 0 | 0 | 0 | 0 |
| 71  | 74  | 1 | 0 | 0 | 0 | 0 |
| 74  | 88  | 1 | 0 | 0 | 0 | 0 |
| 75  | 76  | 1 | 0 | 0 | 0 | 0 |
| 77  | 78  | 1 | 0 | 0 | 0 | 0 |
| 77  | 86  | 2 | 0 | 0 | 0 | 0 |
| 77  | 124 | 1 | 0 | 0 | 0 | 0 |
| 78  | 79  | 1 | 0 | 0 | 0 | 0 |
| 78  | 80  | 2 | 0 | 0 | 0 | 0 |
| 80  | 81  | 1 | 0 | 0 | 0 | 0 |
| 80  | 82  | 1 | 0 | 0 | 0 | 0 |
| 82  | 83  | 1 | 0 | 0 | 0 | 0 |
| 82  | 84  | 2 | 0 | 0 | 0 | 0 |
| 84  | 85  | 1 | 0 | 0 | 0 | 0 |
| 84  | 86  | 1 | 0 | 0 | 0 | 0 |
| 86  | 87  | 1 | 0 | 0 | 0 | 0 |
| 88  | 89  | 1 | 0 | 0 | 0 | 0 |
| 88  | 90  | 1 | 0 | 0 | 0 | 0 |
| 88  | 91  | 1 | 0 | 0 | 0 | 0 |
| 91  | 92  | 1 | 0 | 0 | 0 | 0 |
| 91  | 93  | 1 | 0 | 0 | 0 | 0 |
| 91  | 94  | 1 | 0 | 0 | 0 | 0 |
| 94  | 95  | 1 | 0 | 0 | 0 | 0 |
| 94  | 111 | 2 | 0 | 0 | 0 | 0 |
| 95  | 96  | 1 | 0 | 0 | 0 | 0 |
| 96  | 97  | 1 | 0 | 0 | 0 | 0 |
| 96  | 98  | 1 | 0 | 0 | 0 | 0 |
| 96  | 99  | 1 | 0 | 0 | 0 | 0 |
| 99  | 100 | 1 | 0 | 0 | 0 | 0 |
| 99  | 113 | 1 | 0 | 0 | 0 | 0 |
| 99  | 116 | 1 | 0 | 0 | 0 | 0 |
| 100 | 101 | 1 | 0 | 0 | 0 | 0 |
| 100 | 102 | 1 | 0 | 0 | 0 | 0 |
| 100 | 103 | 1 | 0 | 0 | 0 | 0 |
| 103 | 104 | 1 | 0 | 0 | 0 | 0 |
| 104 | 105 | 1 | 0 | 0 | 0 | 0 |

|        |   |   |   |   |   |
|--------|---|---|---|---|---|
| 104112 | 2 | 0 | 0 | 0 | 0 |
| 105106 | 1 | 0 | 0 | 0 | 0 |
| 105107 | 1 | 0 | 0 | 0 | 0 |
| 105108 | 1 | 0 | 0 | 0 | 0 |
| 108109 | 1 | 0 | 0 | 0 | 0 |
| 108110 | 1 | 0 | 0 | 0 | 0 |
| 108136 | 1 | 0 | 0 | 0 | 0 |
| 113114 | 1 | 0 | 0 | 0 | 0 |
| 113115 | 1 | 0 | 0 | 0 | 0 |
| 113119 | 1 | 0 | 0 | 0 | 0 |
| 116117 | 1 | 0 | 0 | 0 | 0 |
| 116118 | 1 | 0 | 0 | 0 | 0 |
| 116123 | 1 | 0 | 0 | 0 | 0 |
| 119120 | 1 | 0 | 0 | 0 | 0 |
| 119121 | 1 | 0 | 0 | 0 | 0 |
| 119122 | 1 | 0 | 0 | 0 | 0 |
| 123124 | 1 | 0 | 0 | 0 | 0 |
| 124125 | 2 | 0 | 0 | 0 | 0 |
| 126127 | 1 | 0 | 0 | 0 | 0 |
| 126128 | 1 | 0 | 0 | 0 | 0 |
| 128129 | 1 | 0 | 0 | 0 | 0 |
| 128130 | 1 | 0 | 0 | 0 | 0 |
| 128131 | 1 | 0 | 0 | 0 | 0 |
| 131132 | 1 | 0 | 0 | 0 | 0 |
| 131133 | 1 | 0 | 0 | 0 | 0 |
| 131137 | 1 | 0 | 0 | 0 | 0 |
| 133134 | 1 | 0 | 0 | 0 | 0 |
| 133135 | 1 | 0 | 0 | 0 | 0 |
| 133136 | 1 | 0 | 0 | 0 | 0 |
| 136150 | 1 | 0 | 0 | 0 | 0 |
| 137138 | 1 | 0 | 0 | 0 | 0 |
| 139140 | 1 | 0 | 0 | 0 | 0 |
| 139148 | 2 | 0 | 0 | 0 | 0 |
| 139186 | 1 | 0 | 0 | 0 | 0 |
| 140141 | 1 | 0 | 0 | 0 | 0 |
| 140142 | 2 | 0 | 0 | 0 | 0 |
| 142143 | 1 | 0 | 0 | 0 | 0 |
| 142144 | 1 | 0 | 0 | 0 | 0 |
| 144145 | 1 | 0 | 0 | 0 | 0 |
| 144146 | 2 | 0 | 0 | 0 | 0 |
| 146147 | 1 | 0 | 0 | 0 | 0 |
| 146148 | 1 | 0 | 0 | 0 | 0 |
| 148149 | 1 | 0 | 0 | 0 | 0 |
| 150151 | 1 | 0 | 0 | 0 | 0 |
| 150152 | 1 | 0 | 0 | 0 | 0 |
| 150153 | 1 | 0 | 0 | 0 | 0 |
| 153154 | 1 | 0 | 0 | 0 | 0 |
| 153155 | 1 | 0 | 0 | 0 | 0 |
| 153156 | 1 | 0 | 0 | 0 | 0 |
| 156157 | 1 | 0 | 0 | 0 | 0 |
| 156173 | 2 | 0 | 0 | 0 | 0 |
| 157158 | 1 | 0 | 0 | 0 | 0 |
| 158159 | 1 | 0 | 0 | 0 | 0 |
| 158160 | 1 | 0 | 0 | 0 | 0 |
| 158161 | 1 | 0 | 0 | 0 | 0 |
| 161162 | 1 | 0 | 0 | 0 | 0 |
| 161175 | 1 | 0 | 0 | 0 | 0 |
| 161178 | 1 | 0 | 0 | 0 | 0 |
| 162163 | 1 | 0 | 0 | 0 | 0 |
| 162164 | 1 | 0 | 0 | 0 | 0 |
| 162165 | 1 | 0 | 0 | 0 | 0 |
| 165166 | 1 | 0 | 0 | 0 | 0 |
| 166167 | 1 | 0 | 0 | 0 | 0 |
| 166174 | 2 | 0 | 0 | 0 | 0 |
| 167168 | 1 | 0 | 0 | 0 | 0 |
| 167169 | 1 | 0 | 0 | 0 | 0 |
| 167170 | 1 | 0 | 0 | 0 | 0 |
| 170171 | 1 | 0 | 0 | 0 | 0 |
| 170172 | 1 | 0 | 0 | 0 | 0 |
| 170198 | 1 | 0 | 0 | 0 | 0 |
| 175176 | 1 | 0 | 0 | 0 | 0 |
| 175177 | 1 | 0 | 0 | 0 | 0 |
| 175181 | 1 | 0 | 0 | 0 | 0 |
| 178179 | 1 | 0 | 0 | 0 | 0 |
| 178180 | 1 | 0 | 0 | 0 | 0 |
| 178185 | 1 | 0 | 0 | 0 | 0 |
| 181182 | 1 | 0 | 0 | 0 | 0 |
| 181183 | 1 | 0 | 0 | 0 | 0 |
| 181184 | 1 | 0 | 0 | 0 | 0 |
| 185186 | 1 | 0 | 0 | 0 | 0 |
| 186187 | 2 | 0 | 0 | 0 | 0 |

|        |   |   |   |   |   |
|--------|---|---|---|---|---|
| 188189 | 1 | 0 | 0 | 0 | 0 |
| 188190 | 1 | 0 | 0 | 0 | 0 |
| 190191 | 1 | 0 | 0 | 0 | 0 |
| 190192 | 1 | 0 | 0 | 0 | 0 |
| 190193 | 1 | 0 | 0 | 0 | 0 |
| 193194 | 1 | 0 | 0 | 0 | 0 |
| 193195 | 1 | 0 | 0 | 0 | 0 |
| 193199 | 1 | 0 | 0 | 0 | 0 |
| 195196 | 1 | 0 | 0 | 0 | 0 |
| 195197 | 1 | 0 | 0 | 0 | 0 |
| 195198 | 1 | 0 | 0 | 0 | 0 |
| 198212 | 1 | 0 | 0 | 0 | 0 |
| 199200 | 1 | 0 | 0 | 0 | 0 |
| 201202 | 1 | 0 | 0 | 0 | 0 |
| 201210 | 2 | 0 | 0 | 0 | 0 |
| 201248 | 1 | 0 | 0 | 0 | 0 |
| 202203 | 1 | 0 | 0 | 0 | 0 |
| 202204 | 2 | 0 | 0 | 0 | 0 |
| 204205 | 1 | 0 | 0 | 0 | 0 |
| 204206 | 1 | 0 | 0 | 0 | 0 |
| 206207 | 1 | 0 | 0 | 0 | 0 |
| 206208 | 2 | 0 | 0 | 0 | 0 |
| 208209 | 1 | 0 | 0 | 0 | 0 |
| 208210 | 1 | 0 | 0 | 0 | 0 |
| 210211 | 1 | 0 | 0 | 0 | 0 |
| 212213 | 1 | 0 | 0 | 0 | 0 |
| 212214 | 1 | 0 | 0 | 0 | 0 |
| 212215 | 1 | 0 | 0 | 0 | 0 |
| 215216 | 1 | 0 | 0 | 0 | 0 |
| 215217 | 1 | 0 | 0 | 0 | 0 |
| 215218 | 1 | 0 | 0 | 0 | 0 |
| 218219 | 1 | 0 | 0 | 0 | 0 |
| 218235 | 2 | 0 | 0 | 0 | 0 |
| 219220 | 1 | 0 | 0 | 0 | 0 |
| 220221 | 1 | 0 | 0 | 0 | 0 |
| 220222 | 1 | 0 | 0 | 0 | 0 |
| 220223 | 1 | 0 | 0 | 0 | 0 |
| 223224 | 1 | 0 | 0 | 0 | 0 |
| 223237 | 1 | 0 | 0 | 0 | 0 |
| 223240 | 1 | 0 | 0 | 0 | 0 |
| 224225 | 1 | 0 | 0 | 0 | 0 |
| 224226 | 1 | 0 | 0 | 0 | 0 |
| 224227 | 1 | 0 | 0 | 0 | 0 |
| 227228 | 1 | 0 | 0 | 0 | 0 |
| 228229 | 1 | 0 | 0 | 0 | 0 |
| 228236 | 2 | 0 | 0 | 0 | 0 |
| 229230 | 1 | 0 | 0 | 0 | 0 |
| 229231 | 1 | 0 | 0 | 0 | 0 |
| 229232 | 1 | 0 | 0 | 0 | 0 |
| 232233 | 1 | 0 | 0 | 0 | 0 |
| 232234 | 1 | 0 | 0 | 0 | 0 |
| 232260 | 1 | 0 | 0 | 0 | 0 |
| 237238 | 1 | 0 | 0 | 0 | 0 |
| 237239 | 1 | 0 | 0 | 0 | 0 |
| 237243 | 1 | 0 | 0 | 0 | 0 |
| 240241 | 1 | 0 | 0 | 0 | 0 |
| 240242 | 1 | 0 | 0 | 0 | 0 |
| 240247 | 1 | 0 | 0 | 0 | 0 |
| 243244 | 1 | 0 | 0 | 0 | 0 |
| 243245 | 1 | 0 | 0 | 0 | 0 |
| 243246 | 1 | 0 | 0 | 0 | 0 |
| 247248 | 1 | 0 | 0 | 0 | 0 |
| 248249 | 2 | 0 | 0 | 0 | 0 |
| 250251 | 1 | 0 | 0 | 0 | 0 |
| 250252 | 1 | 0 | 0 | 0 | 0 |
| 252253 | 1 | 0 | 0 | 0 | 0 |
| 252254 | 1 | 0 | 0 | 0 | 0 |
| 252255 | 1 | 0 | 0 | 0 | 0 |
| 255256 | 1 | 0 | 0 | 0 | 0 |
| 255257 | 1 | 0 | 0 | 0 | 0 |
| 255261 | 1 | 0 | 0 | 0 | 0 |
| 257258 | 1 | 0 | 0 | 0 | 0 |
| 257259 | 1 | 0 | 0 | 0 | 0 |
| 257260 | 1 | 0 | 0 | 0 | 0 |
| 260274 | 1 | 0 | 0 | 0 | 0 |
| 261262 | 1 | 0 | 0 | 0 | 0 |
| 263264 | 1 | 0 | 0 | 0 | 0 |
| 263272 | 2 | 0 | 0 | 0 | 0 |
| 263311 | 1 | 0 | 0 | 0 | 0 |
| 264265 | 1 | 0 | 0 | 0 | 0 |
| 264266 | 2 | 0 | 0 | 0 | 0 |

266267 1 0 0 0 0  
266268 1 0 0 0 0  
268269 1 0 0 0 0  
268270 2 0 0 0 0  
270271 1 0 0 0 0  
270272 1 0 0 0 0  
272273 1 0 0 0 0  
274275 1 0 0 0 0  
274276 1 0 0 0 0  
274277 1 0 0 0 0  
277278 1 0 0 0 0  
277279 1 0 0 0 0  
277280 1 0 0 0 0  
280281 1 0 0 0 0  
280298 2 0 0 0 0  
281282 1 0 0 0 0  
282283 1 0 0 0 0  
282284 1 0 0 0 0  
282285 1 0 0 0 0  
285286 1 0 0 0 0  
285300 1 0 0 0 0  
285303 1 0 0 0 0  
286287 1 0 0 0 0  
286288 1 0 0 0 0  
286289 1 0 0 0 0  
289290 1 0 0 0 0  
290291 1 0 0 0 0  
290299 2 0 0 0 0  
291292 1 0 0 0 0  
291293 1 0 0 0 0  
291294 1 0 0 0 0  
294295 1 0 0 0 0  
294296 1 0 0 0 0  
294297 1 0 0 0 0  
300301 1 0 0 0 0  
300302 1 0 0 0 0  
300306 1 0 0 0 0  
303304 1 0 0 0 0  
303305 1 0 0 0 0  
303310 1 0 0 0 0  
306307 1 0 0 0 0  
306308 1 0 0 0 0  
306309 1 0 0 0 0  
310311 1 0 0 0 0  
311312 2 0 0 0 0

M END  
> <NAME>  
AA24\_1

\$\$\$\$  
AA28\_1  
MOE2012 3D

322326 0 0 1 0 0 0 0 0 0999 V2000  
39.5490 -2.0540 19.6260 O 0 0 0 0 0 0 0 0 0 0 0 0 0 0 0 0  
39.9260 -2.2720 20.4950 H 0 0 0 0 0 0 0 0 0 0 0 0 0 0 0 0  
38.4410 -2.9180 19.4190 C 0 0 0 0 0 0 0 0 0 0 0 0 0 0 0 0  
38.7940 -3.9530 19.4620 H 0 0 0 0 0 0 0 0 0 0 0 0 0 0 0 0  
37.7170 -2.7540 20.2230 H 0 0 0 0 0 0 0 0 0 0 0 0 0 0 0 0  
37.8280 -2.6080 18.0610 C 0 0 0 0 0 0 0 0 0 0 0 0 0 0 0 0  
37.5320 -1.5520 18.0290 H 0 0 0 0 0 0 0 0 0 0 0 0 0 0 0 0  
38.5910 -2.7300 17.2820 H 0 0 0 0 0 0 0 0 0 0 0 0 0 0 0 0  
36.6260 -3.5040 17.7710 C 0 0 0 0 0 0 0 0 0 0 0 0 0 0 0 0  
36.9390 -4.5560 17.7980 H 0 0 0 0 0 0 0 0 0 0 0 0 0 0 0 0  
35.8810 -3.3680 18.5630 H 0 0 0 0 0 0 0 0 0 0 0 0 0 0 0 0  
36.0160 -3.1810 16.4040 C 0 0 0 0 0 0 0 0 0 0 0 0 0 0 0 0  
35.6960 -2.1330 16.3590 H 0 0 0 0 0 0 0 0 0 0 0 0 0 0 0 0  
36.7910 -3.2960 15.6360 H 0 0 0 0 0 0 0 0 0 0 0 0 0 0 0 0  
34.9130 -4.0710 16.0440 N 0 0 3 0 0 0 0 0 0 0 0 0 0 0 0 0  
35.1890 -5.0420 16.1850 H 0 0 0 0 0 0 0 0 0 0 0 0 0 0 0 0  
33.8310 -4.2680 8.8590 C 0 0 0 0 0 0 0 0 0 0 0 0 0 0 0 0  
34.1690 -2.9970 8.3750 C 0 0 0 0 0 0 0 0 0 0 0 0 0 0 0 0  
33.4140 -2.2190 8.2810 H 0 0 0 0 0 0 0 0 0 0 0 0 0 0 0 0  
35.4860 -2.7100 8.0160 C 0 0 0 0 0 0 0 0 0 0 0 0 0 0 0 0  
35.7460 -1.7230 7.6450 H 0 0 0 0 0 0 0 0 0 0 0 0 0 0 0 0  
36.4680 -3.6920 8.1340 C 0 0 0 0 0 0 0 0 0 0 0 0 0 0 0 0  
37.4920 -3.4670 7.8540 H 0 0 0 0 0 0 0 0 0 0 0 0 0 0 0 0  
36.1370 -4.9610 8.6050 C 0 0 0 0 0 0 0 0 0 0 0 0 0 0 0 0  
36.9020 -5.7300 8.6840 H 0 0 0 0 0 0 0 0 0 0 0 0 0 0 0 0  
34.8210 -5.2490 8.9710 C 0 0 0 0 0 0 0 0 0 0 0 0 0 0 0 0  
34.5910 -6.2480 9.3350 H 0 0 0 0 0 0 0 0 0 0 0 0 0 0 0 0









|         |          |         |   |   |   |   |   |   |   |   |   |   |   |   |   |
|---------|----------|---------|---|---|---|---|---|---|---|---|---|---|---|---|---|
| 46.6940 | -13.8060 | 3.0920  | H | 0 | 0 | 0 | 0 | 0 | 0 | 0 | 0 | 0 | 0 | 0 | 0 |
| 47.5290 | -12.6040 | 1.5430  | N | 0 | 0 | 3 | 0 | 0 | 0 | 0 | 0 | 0 | 0 | 0 | 0 |
| 51.8870 | -7.8290  | -5.1830 | C | 0 | 0 | 0 | 0 | 0 | 0 | 0 | 0 | 0 | 0 | 0 | 0 |
| 51.0320 | -8.6460  | -5.9320 | C | 0 | 0 | 0 | 0 | 0 | 0 | 0 | 0 | 0 | 0 | 0 | 0 |
| 50.0250 | -8.8710  | -5.5860 | H | 0 | 0 | 0 | 0 | 0 | 0 | 0 | 0 | 0 | 0 | 0 | 0 |
| 51.4590 | -9.1750  | -7.1510 | C | 0 | 0 | 0 | 0 | 0 | 0 | 0 | 0 | 0 | 0 | 0 | 0 |
| 50.7930 | -9.8080  | -7.7310 | H | 0 | 0 | 0 | 0 | 0 | 0 | 0 | 0 | 0 | 0 | 0 | 0 |
| 52.7380 | -8.8880  | -7.6260 | C | 0 | 0 | 0 | 0 | 0 | 0 | 0 | 0 | 0 | 0 | 0 | 0 |
| 53.0690 | -9.3020  | -8.5750 | H | 0 | 0 | 0 | 0 | 0 | 0 | 0 | 0 | 0 | 0 | 0 | 0 |
| 53.5900 | -8.0660  | -6.8880 | C | 0 | 0 | 0 | 0 | 0 | 0 | 0 | 0 | 0 | 0 | 0 | 0 |
| 54.5850 | -7.8410  | -7.2610 | H | 0 | 0 | 0 | 0 | 0 | 0 | 0 | 0 | 0 | 0 | 0 | 0 |
| 53.1650 | -7.5320  | -5.6700 | C | 0 | 0 | 0 | 0 | 0 | 0 | 0 | 0 | 0 | 0 | 0 | 0 |
| 53.8380 | -6.8900  | -5.1060 | H | 0 | 0 | 0 | 0 | 0 | 0 | 0 | 0 | 0 | 0 | 0 | 0 |
| 46.9510 | -13.3480 | 0.4050  | C | 0 | 0 | 0 | 0 | 0 | 0 | 0 | 0 | 0 | 0 | 0 | 0 |
| 45.9930 | -13.8000 | 0.6940  | H | 0 | 0 | 0 | 0 | 0 | 0 | 0 | 0 | 0 | 0 | 0 | 0 |
| 47.6250 | -14.1820 | 0.1690  | H | 0 | 0 | 0 | 0 | 0 | 0 | 0 | 0 | 0 | 0 | 0 | 0 |
| 46.7370 | -12.5650 | -0.8890 | C | 0 | 0 | 0 | 0 | 0 | 0 | 0 | 0 | 0 | 0 | 0 | 0 |
| 46.3830 | -13.2340 | -1.6820 | H | 0 | 0 | 0 | 0 | 0 | 0 | 0 | 0 | 0 | 0 | 0 | 0 |
| 45.9540 | -11.8070 | -0.7670 | H | 0 | 0 | 0 | 0 | 0 | 0 | 0 | 0 | 0 | 0 | 0 | 0 |
| 48.0090 | -11.9230 | -1.3770 | C | 0 | 0 | 0 | 0 | 0 | 0 | 0 | 0 | 0 | 0 | 0 | 0 |
| 47.8710 | -10.5690 | -1.3610 | O | 0 | 0 | 0 | 0 | 0 | 0 | 0 | 0 | 0 | 0 | 0 | 0 |
| 49.0410 | -9.8220  | -1.7240 | C | 0 | 0 | 0 | 0 | 0 | 0 | 0 | 0 | 0 | 0 | 0 | 0 |
| 49.8300 | -10.0210 | -0.9890 | H | 0 | 0 | 0 | 0 | 0 | 0 | 0 | 0 | 0 | 0 | 0 | 0 |
| 49.3860 | -10.1560 | -2.7100 | H | 0 | 0 | 0 | 0 | 0 | 0 | 0 | 0 | 0 | 0 | 0 | 0 |
| 48.6870 | -8.3080  | -1.7410 | C | 0 | 0 | 3 | 0 | 0 | 0 | 0 | 0 | 0 | 0 | 0 | 0 |
| 47.5900 | -8.1180  | -2.8200 | C | 0 | 0 | 0 | 0 | 0 | 0 | 0 | 0 | 0 | 0 | 0 | 0 |
| 47.8730 | -8.6170  | -3.7550 | H | 0 | 0 | 0 | 0 | 0 | 0 | 0 | 0 | 0 | 0 | 0 | 0 |
| 46.6570 | -8.5930  | -2.5000 | H | 0 | 0 | 0 | 0 | 0 | 0 | 0 | 0 | 0 | 0 | 0 | 0 |
| 47.2880 | -6.7320  | -3.0320 | O | 0 | 0 | 0 | 0 | 0 | 0 | 0 | 0 | 0 | 0 | 0 | 0 |
| 47.5920 | -6.2070  | -4.2520 | C | 0 | 0 | 0 | 0 | 0 | 0 | 0 | 0 | 0 | 0 | 0 | 0 |
| 47.2100 | -4.7460  | -4.2650 | C | 0 | 0 | 0 | 0 | 0 | 0 | 0 | 0 | 0 | 0 | 0 | 0 |
| 46.1270 | -4.6700  | -4.1210 | H | 0 | 0 | 0 | 0 | 0 | 0 | 0 | 0 | 0 | 0 | 0 | 0 |
| 47.7190 | -4.2480  | -3.4320 | H | 0 | 0 | 0 | 0 | 0 | 0 | 0 | 0 | 0 | 0 | 0 | 0 |
| 47.5990 | -4.0660  | -5.5660 | C | 0 | 0 | 0 | 0 | 0 | 0 | 0 | 0 | 0 | 0 | 0 | 0 |
| 48.6790 | -4.1290  | -5.7350 | H | 0 | 0 | 0 | 0 | 0 | 0 | 0 | 0 | 0 | 0 | 0 | 0 |
| 47.3170 | -3.0090  | -5.5420 | H | 0 | 0 | 0 | 0 | 0 | 0 | 0 | 0 | 0 | 0 | 0 | 0 |
| 47.0980 | -4.5350  | -6.4190 | H | 0 | 0 | 0 | 0 | 0 | 0 | 0 | 0 | 0 | 0 | 0 | 0 |
| 49.0020 | -12.5320 | -1.7480 | O | 0 | 0 | 0 | 0 | 0 | 0 | 0 | 0 | 0 | 0 | 0 | 0 |
| 48.0930 | -6.8110  | -5.1900 | O | 0 | 0 | 0 | 0 | 0 | 0 | 0 | 0 | 0 | 0 | 0 | 0 |
| 48.1700 | -7.9050  | -0.3250 | C | 0 | 0 | 0 | 0 | 0 | 0 | 0 | 0 | 0 | 0 | 0 | 0 |
| 47.2270 | -8.4270  | -0.1170 | H | 0 | 0 | 0 | 0 | 0 | 0 | 0 | 0 | 0 | 0 | 0 | 0 |
| 48.8860 | -8.2660  | 0.4260  | H | 0 | 0 | 0 | 0 | 0 | 0 | 0 | 0 | 0 | 0 | 0 | 0 |
| 49.9570 | -7.5090  | -2.1040 | C | 0 | 0 | 0 | 0 | 0 | 0 | 0 | 0 | 0 | 0 | 0 | 0 |
| 49.7470 | -6.4360  | -2.1680 | H | 0 | 0 | 0 | 0 | 0 | 0 | 0 | 0 | 0 | 0 | 0 | 0 |
| 50.7370 | -7.6700  | -1.3490 | H | 0 | 0 | 0 | 0 | 0 | 0 | 0 | 0 | 0 | 0 | 0 | 0 |
| 47.9440 | -6.4220  | -0.0560 | C | 0 | 0 | 0 | 0 | 0 | 0 | 0 | 0 | 0 | 0 | 0 | 0 |
| 47.1740 | -5.9980  | -0.7030 | H | 0 | 0 | 0 | 0 | 0 | 0 | 0 | 0 | 0 | 0 | 0 | 0 |
| 48.8630 | -5.8420  | -0.1720 | H | 0 | 0 | 0 | 0 | 0 | 0 | 0 | 0 | 0 | 0 | 0 | 0 |
| 47.6050 | -6.2870  | 0.9770  | H | 0 | 0 | 0 | 0 | 0 | 0 | 0 | 0 | 0 | 0 | 0 | 0 |
| 50.4480 | -7.9640  | -3.3740 | O | 0 | 0 | 0 | 0 | 0 | 0 | 0 | 0 | 0 | 0 | 0 | 0 |
| 51.4830 | -7.2560  | -3.8910 | C | 0 | 0 | 0 | 0 | 0 | 0 | 0 | 0 | 0 | 0 | 0 | 0 |
| 52.0420 | -6.3030  | -3.3680 | O | 0 | 0 | 0 | 0 | 0 | 0 | 0 | 0 | 0 | 0 | 0 | 0 |
| 1       | 2        | 1       | 0 | 0 | 0 | 0 |   |   |   |   |   |   |   |   |   |
| 1       | 3        | 1       | 0 | 0 | 0 | 0 |   |   |   |   |   |   |   |   |   |
| 3       | 4        | 1       | 0 | 0 | 0 | 0 |   |   |   |   |   |   |   |   |   |
| 3       | 5        | 1       | 0 | 0 | 0 | 0 |   |   |   |   |   |   |   |   |   |
| 3       | 6        | 1       | 0 | 0 | 0 | 0 |   |   |   |   |   |   |   |   |   |
| 6       | 7        | 1       | 0 | 0 | 0 | 0 |   |   |   |   |   |   |   |   |   |
| 6       | 8        | 1       | 0 | 0 | 0 | 0 |   |   |   |   |   |   |   |   |   |
| 6       | 9        | 1       | 0 | 0 | 0 | 0 |   |   |   |   |   |   |   |   |   |
| 9       | 10       | 1       | 0 | 0 | 0 | 0 |   |   |   |   |   |   |   |   |   |
| 9       | 11       | 1       | 0 | 0 | 0 | 0 |   |   |   |   |   |   |   |   |   |
| 9       | 12       | 1       | 0 | 0 | 0 | 0 |   |   |   |   |   |   |   |   |   |
| 12      | 13       | 1       | 0 | 0 | 0 | 0 |   |   |   |   |   |   |   |   |   |
| 12      | 14       | 1       | 0 | 0 | 0 | 0 |   |   |   |   |   |   |   |   |   |
| 12      | 15       | 1       | 0 | 0 | 0 | 0 |   |   |   |   |   |   |   |   |   |
| 15      | 16       | 1       | 0 | 0 | 0 | 0 |   |   |   |   |   |   |   |   |   |
| 15      | 28       | 1       | 0 | 0 | 0 | 0 |   |   |   |   |   |   |   |   |   |
| 17      | 18       | 1       | 0 | 0 | 0 | 0 |   |   |   |   |   |   |   |   |   |
| 17      | 26       | 2       | 0 | 0 | 0 | 0 |   |   |   |   |   |   |   |   |   |
| 17      | 64       | 1       | 0 | 0 | 0 | 0 |   |   |   |   |   |   |   |   |   |
| 18      | 19       | 1       | 0 | 0 | 0 | 0 |   |   |   |   |   |   |   |   |   |
| 18      | 20       | 2       | 0 | 0 | 0 | 0 |   |   |   |   |   |   |   |   |   |
| 20      | 21       | 1       | 0 | 0 | 0 | 0 |   |   |   |   |   |   |   |   |   |
| 20      | 22       | 1       | 0 | 0 | 0 | 0 |   |   |   |   |   |   |   |   |   |
| 22      | 23       | 1       | 0 | 0 | 0 | 0 |   |   |   |   |   |   |   |   |   |
| 22      | 24       | 2       | 0 | 0 | 0 | 0 |   |   |   |   |   |   |   |   |   |
| 24      | 25       | 1       | 0 | 0 | 0 | 0 |   |   |   |   |   |   |   |   |   |
| 24      | 26       | 1       | 0 | 0 | 0 | 0 |   |   |   |   |   |   |   |   |   |
| 26      | 27       | 1       | 0 | 0 | 0 | 0 |   |   |   |   |   |   |   |   |   |
| 28      | 29       | 1       | 0 | 0 | 0 | 0 |   |   |   |   |   |   |   |   |   |

|     |     |   |   |   |   |   |
|-----|-----|---|---|---|---|---|
| 28  | 30  | 1 | 0 | 0 | 0 | 0 |
| 28  | 31  | 1 | 0 | 0 | 0 | 0 |
| 31  | 32  | 1 | 0 | 0 | 0 | 0 |
| 31  | 33  | 1 | 0 | 0 | 0 | 0 |
| 31  | 34  | 1 | 0 | 0 | 0 | 0 |
| 34  | 35  | 1 | 0 | 0 | 0 | 0 |
| 34  | 51  | 2 | 0 | 0 | 0 | 0 |
| 35  | 36  | 1 | 0 | 0 | 0 | 0 |
| 36  | 37  | 1 | 0 | 0 | 0 | 0 |
| 36  | 38  | 1 | 0 | 0 | 0 | 0 |
| 36  | 39  | 1 | 0 | 0 | 0 | 0 |
| 39  | 40  | 1 | 0 | 0 | 0 | 0 |
| 39  | 53  | 1 | 0 | 0 | 0 | 0 |
| 39  | 56  | 1 | 0 | 0 | 0 | 0 |
| 40  | 41  | 1 | 0 | 0 | 0 | 0 |
| 40  | 42  | 1 | 0 | 0 | 0 | 0 |
| 40  | 43  | 1 | 0 | 0 | 0 | 0 |
| 43  | 44  | 1 | 0 | 0 | 0 | 0 |
| 44  | 45  | 1 | 0 | 0 | 0 | 0 |
| 44  | 52  | 2 | 0 | 0 | 0 | 0 |
| 45  | 46  | 1 | 0 | 0 | 0 | 0 |
| 45  | 47  | 1 | 0 | 0 | 0 | 0 |
| 45  | 48  | 1 | 0 | 0 | 0 | 0 |
| 48  | 49  | 1 | 0 | 0 | 0 | 0 |
| 48  | 50  | 1 | 0 | 0 | 0 | 0 |
| 48  | 80  | 1 | 0 | 0 | 0 | 0 |
| 53  | 54  | 1 | 0 | 0 | 0 | 0 |
| 53  | 55  | 1 | 0 | 0 | 0 | 0 |
| 53  | 59  | 1 | 0 | 0 | 0 | 0 |
| 56  | 57  | 1 | 0 | 0 | 0 | 0 |
| 56  | 58  | 1 | 0 | 0 | 0 | 0 |
| 56  | 63  | 1 | 0 | 0 | 0 | 0 |
| 59  | 60  | 1 | 0 | 0 | 0 | 0 |
| 59  | 61  | 1 | 0 | 0 | 0 | 0 |
| 59  | 62  | 1 | 0 | 0 | 0 | 0 |
| 63  | 64  | 1 | 0 | 0 | 0 | 0 |
| 64  | 65  | 2 | 0 | 0 | 0 | 0 |
| 66  | 67  | 1 | 0 | 0 | 0 | 0 |
| 66  | 68  | 1 | 0 | 0 | 0 | 0 |
| 68  | 69  | 1 | 0 | 0 | 0 | 0 |
| 68  | 70  | 1 | 0 | 0 | 0 | 0 |
| 68  | 71  | 1 | 0 | 0 | 0 | 0 |
| 71  | 72  | 1 | 0 | 0 | 0 | 0 |
| 71  | 73  | 1 | 0 | 0 | 0 | 0 |
| 71  | 74  | 1 | 0 | 0 | 0 | 0 |
| 74  | 75  | 1 | 0 | 0 | 0 | 0 |
| 74  | 76  | 1 | 0 | 0 | 0 | 0 |
| 74  | 77  | 1 | 0 | 0 | 0 | 0 |
| 77  | 78  | 1 | 0 | 0 | 0 | 0 |
| 77  | 79  | 1 | 0 | 0 | 0 | 0 |
| 77  | 80  | 1 | 0 | 0 | 0 | 0 |
| 80  | 92  | 1 | 0 | 0 | 0 | 0 |
| 81  | 82  | 1 | 0 | 0 | 0 | 0 |
| 81  | 90  | 2 | 0 | 0 | 0 | 0 |
| 81  | 128 | 1 | 0 | 0 | 0 | 0 |
| 82  | 83  | 1 | 0 | 0 | 0 | 0 |
| 82  | 84  | 2 | 0 | 0 | 0 | 0 |
| 84  | 85  | 1 | 0 | 0 | 0 | 0 |
| 84  | 86  | 1 | 0 | 0 | 0 | 0 |
| 86  | 87  | 1 | 0 | 0 | 0 | 0 |
| 86  | 88  | 2 | 0 | 0 | 0 | 0 |
| 88  | 89  | 1 | 0 | 0 | 0 | 0 |
| 88  | 90  | 1 | 0 | 0 | 0 | 0 |
| 90  | 91  | 1 | 0 | 0 | 0 | 0 |
| 92  | 93  | 1 | 0 | 0 | 0 | 0 |
| 92  | 94  | 1 | 0 | 0 | 0 | 0 |
| 92  | 95  | 1 | 0 | 0 | 0 | 0 |
| 95  | 96  | 1 | 0 | 0 | 0 | 0 |
| 95  | 97  | 1 | 0 | 0 | 0 | 0 |
| 95  | 98  | 1 | 0 | 0 | 0 | 0 |
| 98  | 99  | 1 | 0 | 0 | 0 | 0 |
| 98  | 115 | 2 | 0 | 0 | 0 | 0 |
| 99  | 100 | 1 | 0 | 0 | 0 | 0 |
| 100 | 101 | 1 | 0 | 0 | 0 | 0 |
| 100 | 102 | 1 | 0 | 0 | 0 | 0 |
| 100 | 103 | 1 | 0 | 0 | 0 | 0 |
| 103 | 104 | 1 | 0 | 0 | 0 | 0 |
| 103 | 117 | 1 | 0 | 0 | 0 | 0 |
| 103 | 120 | 1 | 0 | 0 | 0 | 0 |
| 104 | 105 | 1 | 0 | 0 | 0 | 0 |
| 104 | 106 | 1 | 0 | 0 | 0 | 0 |

|        |   |   |   |   |   |
|--------|---|---|---|---|---|
| 104107 | 1 | 0 | 0 | 0 | 0 |
| 107108 | 1 | 0 | 0 | 0 | 0 |
| 108109 | 1 | 0 | 0 | 0 | 0 |
| 108116 | 2 | 0 | 0 | 0 | 0 |
| 109110 | 1 | 0 | 0 | 0 | 0 |
| 109111 | 1 | 0 | 0 | 0 | 0 |
| 109112 | 1 | 0 | 0 | 0 | 0 |
| 112113 | 1 | 0 | 0 | 0 | 0 |
| 112114 | 1 | 0 | 0 | 0 | 0 |
| 112144 | 1 | 0 | 0 | 0 | 0 |
| 117118 | 1 | 0 | 0 | 0 | 0 |
| 117119 | 1 | 0 | 0 | 0 | 0 |
| 117123 | 1 | 0 | 0 | 0 | 0 |
| 120121 | 1 | 0 | 0 | 0 | 0 |
| 120122 | 1 | 0 | 0 | 0 | 0 |
| 120127 | 1 | 0 | 0 | 0 | 0 |
| 123124 | 1 | 0 | 0 | 0 | 0 |
| 123125 | 1 | 0 | 0 | 0 | 0 |
| 123126 | 1 | 0 | 0 | 0 | 0 |
| 127128 | 1 | 0 | 0 | 0 | 0 |
| 128129 | 2 | 0 | 0 | 0 | 0 |
| 130131 | 1 | 0 | 0 | 0 | 0 |
| 130132 | 1 | 0 | 0 | 0 | 0 |
| 132133 | 1 | 0 | 0 | 0 | 0 |
| 132134 | 1 | 0 | 0 | 0 | 0 |
| 132135 | 1 | 0 | 0 | 0 | 0 |
| 135136 | 1 | 0 | 0 | 0 | 0 |
| 135137 | 1 | 0 | 0 | 0 | 0 |
| 135138 | 1 | 0 | 0 | 0 | 0 |
| 138139 | 1 | 0 | 0 | 0 | 0 |
| 138140 | 1 | 0 | 0 | 0 | 0 |
| 138141 | 1 | 0 | 0 | 0 | 0 |
| 141142 | 1 | 0 | 0 | 0 | 0 |
| 141143 | 1 | 0 | 0 | 0 | 0 |
| 141144 | 1 | 0 | 0 | 0 | 0 |
| 144156 | 1 | 0 | 0 | 0 | 0 |
| 145146 | 1 | 0 | 0 | 0 | 0 |
| 145154 | 2 | 0 | 0 | 0 | 0 |
| 145192 | 1 | 0 | 0 | 0 | 0 |
| 146147 | 1 | 0 | 0 | 0 | 0 |
| 146148 | 2 | 0 | 0 | 0 | 0 |
| 148149 | 1 | 0 | 0 | 0 | 0 |
| 148150 | 1 | 0 | 0 | 0 | 0 |
| 150151 | 1 | 0 | 0 | 0 | 0 |
| 150152 | 2 | 0 | 0 | 0 | 0 |
| 152153 | 1 | 0 | 0 | 0 | 0 |
| 152154 | 1 | 0 | 0 | 0 | 0 |
| 154155 | 1 | 0 | 0 | 0 | 0 |
| 156157 | 1 | 0 | 0 | 0 | 0 |
| 156158 | 1 | 0 | 0 | 0 | 0 |
| 156159 | 1 | 0 | 0 | 0 | 0 |
| 159160 | 1 | 0 | 0 | 0 | 0 |
| 159161 | 1 | 0 | 0 | 0 | 0 |
| 159162 | 1 | 0 | 0 | 0 | 0 |
| 162163 | 1 | 0 | 0 | 0 | 0 |
| 162179 | 2 | 0 | 0 | 0 | 0 |
| 163164 | 1 | 0 | 0 | 0 | 0 |
| 164165 | 1 | 0 | 0 | 0 | 0 |
| 164166 | 1 | 0 | 0 | 0 | 0 |
| 164167 | 1 | 0 | 0 | 0 | 0 |
| 167168 | 1 | 0 | 0 | 0 | 0 |
| 167181 | 1 | 0 | 0 | 0 | 0 |
| 167184 | 1 | 0 | 0 | 0 | 0 |
| 168169 | 1 | 0 | 0 | 0 | 0 |
| 168170 | 1 | 0 | 0 | 0 | 0 |
| 168171 | 1 | 0 | 0 | 0 | 0 |
| 171172 | 1 | 0 | 0 | 0 | 0 |
| 172173 | 1 | 0 | 0 | 0 | 0 |
| 172180 | 2 | 0 | 0 | 0 | 0 |
| 173174 | 1 | 0 | 0 | 0 | 0 |
| 173175 | 1 | 0 | 0 | 0 | 0 |
| 173176 | 1 | 0 | 0 | 0 | 0 |
| 176177 | 1 | 0 | 0 | 0 | 0 |
| 176178 | 1 | 0 | 0 | 0 | 0 |
| 176208 | 1 | 0 | 0 | 0 | 0 |
| 181182 | 1 | 0 | 0 | 0 | 0 |
| 181183 | 1 | 0 | 0 | 0 | 0 |
| 181187 | 1 | 0 | 0 | 0 | 0 |
| 184185 | 1 | 0 | 0 | 0 | 0 |
| 184186 | 1 | 0 | 0 | 0 | 0 |
| 184191 | 1 | 0 | 0 | 0 | 0 |

|        |   |   |   |   |   |
|--------|---|---|---|---|---|
| 187188 | 1 | 0 | 0 | 0 | 0 |
| 187189 | 1 | 0 | 0 | 0 | 0 |
| 187190 | 1 | 0 | 0 | 0 | 0 |
| 191192 | 1 | 0 | 0 | 0 | 0 |
| 192193 | 2 | 0 | 0 | 0 | 0 |
| 194195 | 1 | 0 | 0 | 0 | 0 |
| 194196 | 1 | 0 | 0 | 0 | 0 |
| 196197 | 1 | 0 | 0 | 0 | 0 |
| 196198 | 1 | 0 | 0 | 0 | 0 |
| 196199 | 1 | 0 | 0 | 0 | 0 |
| 199200 | 1 | 0 | 0 | 0 | 0 |
| 199201 | 1 | 0 | 0 | 0 | 0 |
| 199202 | 1 | 0 | 0 | 0 | 0 |
| 202203 | 1 | 0 | 0 | 0 | 0 |
| 202204 | 1 | 0 | 0 | 0 | 0 |
| 202205 | 1 | 0 | 0 | 0 | 0 |
| 205206 | 1 | 0 | 0 | 0 | 0 |
| 205207 | 1 | 0 | 0 | 0 | 0 |
| 205208 | 1 | 0 | 0 | 0 | 0 |
| 208220 | 1 | 0 | 0 | 0 | 0 |
| 209210 | 1 | 0 | 0 | 0 | 0 |
| 209218 | 2 | 0 | 0 | 0 | 0 |
| 209256 | 1 | 0 | 0 | 0 | 0 |
| 210211 | 1 | 0 | 0 | 0 | 0 |
| 210212 | 2 | 0 | 0 | 0 | 0 |
| 212213 | 1 | 0 | 0 | 0 | 0 |
| 212214 | 1 | 0 | 0 | 0 | 0 |
| 214215 | 1 | 0 | 0 | 0 | 0 |
| 214216 | 2 | 0 | 0 | 0 | 0 |
| 216217 | 1 | 0 | 0 | 0 | 0 |
| 216218 | 1 | 0 | 0 | 0 | 0 |
| 218219 | 1 | 0 | 0 | 0 | 0 |
| 220221 | 1 | 0 | 0 | 0 | 0 |
| 220222 | 1 | 0 | 0 | 0 | 0 |
| 220223 | 1 | 0 | 0 | 0 | 0 |
| 223224 | 1 | 0 | 0 | 0 | 0 |
| 223225 | 1 | 0 | 0 | 0 | 0 |
| 223226 | 1 | 0 | 0 | 0 | 0 |
| 226227 | 1 | 0 | 0 | 0 | 0 |
| 226243 | 2 | 0 | 0 | 0 | 0 |
| 227228 | 1 | 0 | 0 | 0 | 0 |
| 228229 | 1 | 0 | 0 | 0 | 0 |
| 228230 | 1 | 0 | 0 | 0 | 0 |
| 228231 | 1 | 0 | 0 | 0 | 0 |
| 231232 | 1 | 0 | 0 | 0 | 0 |
| 231245 | 1 | 0 | 0 | 0 | 0 |
| 231248 | 1 | 0 | 0 | 0 | 0 |
| 232233 | 1 | 0 | 0 | 0 | 0 |
| 232234 | 1 | 0 | 0 | 0 | 0 |
| 232235 | 1 | 0 | 0 | 0 | 0 |
| 235236 | 1 | 0 | 0 | 0 | 0 |
| 236237 | 1 | 0 | 0 | 0 | 0 |
| 236244 | 2 | 0 | 0 | 0 | 0 |
| 237238 | 1 | 0 | 0 | 0 | 0 |
| 237239 | 1 | 0 | 0 | 0 | 0 |
| 237240 | 1 | 0 | 0 | 0 | 0 |
| 240241 | 1 | 0 | 0 | 0 | 0 |
| 240242 | 1 | 0 | 0 | 0 | 0 |
| 240272 | 1 | 0 | 0 | 0 | 0 |
| 245246 | 1 | 0 | 0 | 0 | 0 |
| 245247 | 1 | 0 | 0 | 0 | 0 |
| 245251 | 1 | 0 | 0 | 0 | 0 |
| 248249 | 1 | 0 | 0 | 0 | 0 |
| 248250 | 1 | 0 | 0 | 0 | 0 |
| 248255 | 1 | 0 | 0 | 0 | 0 |
| 251252 | 1 | 0 | 0 | 0 | 0 |
| 251253 | 1 | 0 | 0 | 0 | 0 |
| 251254 | 1 | 0 | 0 | 0 | 0 |
| 255256 | 1 | 0 | 0 | 0 | 0 |
| 256257 | 2 | 0 | 0 | 0 | 0 |
| 258259 | 1 | 0 | 0 | 0 | 0 |
| 258260 | 1 | 0 | 0 | 0 | 0 |
| 260261 | 1 | 0 | 0 | 0 | 0 |
| 260262 | 1 | 0 | 0 | 0 | 0 |
| 260263 | 1 | 0 | 0 | 0 | 0 |
| 263264 | 1 | 0 | 0 | 0 | 0 |
| 263265 | 1 | 0 | 0 | 0 | 0 |
| 263266 | 1 | 0 | 0 | 0 | 0 |
| 266267 | 1 | 0 | 0 | 0 | 0 |
| 266268 | 1 | 0 | 0 | 0 | 0 |
| 266269 | 1 | 0 | 0 | 0 | 0 |

```

269270 1 0 0 0 0
269271 1 0 0 0 0
269272 1 0 0 0 0
272284 1 0 0 0 0
273274 1 0 0 0 0
273282 2 0 0 0 0
273321 1 0 0 0 0
274275 1 0 0 0 0
274276 2 0 0 0 0
276277 1 0 0 0 0
276278 1 0 0 0 0
278279 1 0 0 0 0
278280 2 0 0 0 0
280281 1 0 0 0 0
280282 1 0 0 0 0
282283 1 0 0 0 0
284285 1 0 0 0 0
284286 1 0 0 0 0
284287 1 0 0 0 0
287288 1 0 0 0 0
287289 1 0 0 0 0
287290 1 0 0 0 0
290291 1 0 0 0 0
290308 2 0 0 0 0
291292 1 0 0 0 0
292293 1 0 0 0 0
292294 1 0 0 0 0
292295 1 0 0 0 0
295296 1 0 0 0 0
295310 1 0 0 0 0
295313 1 0 0 0 0
296297 1 0 0 0 0
296298 1 0 0 0 0
296299 1 0 0 0 0
299300 1 0 0 0 0
300301 1 0 0 0 0
300309 2 0 0 0 0
301302 1 0 0 0 0
301303 1 0 0 0 0
301304 1 0 0 0 0
304305 1 0 0 0 0
304306 1 0 0 0 0
304307 1 0 0 0 0
310311 1 0 0 0 0
310312 1 0 0 0 0
310316 1 0 0 0 0
313314 1 0 0 0 0
313315 1 0 0 0 0
313320 1 0 0 0 0
316317 1 0 0 0 0
316318 1 0 0 0 0
316319 1 0 0 0 0
320321 1 0 0 0 0
321322 2 0 0 0 0

```

```

M END
> <NAME>
AA28_1

```

```

$$$$
AA36_1
MOE2012 3D

```

```

352356 0 0 1 0 0 0 0 0999 V2000
13.8140 -4.0400 -15.5220 O 0 0 0 0 0 0 0 0 0 0 0 0 0 0 0 0
14.3890 -4.8230 -15.4830 H 0 0 0 0 0 0 0 0 0 0 0 0 0 0 0 0
14.0100 -3.3210 -14.3110 C 0 0 0 0 0 0 0 0 0 0 0 0 0 0 0 0
13.7480 -3.9750 -13.4730 H 0 0 0 0 0 0 0 0 0 0 0 0 0 0 0 0
15.0690 -3.0520 -14.2340 H 0 0 0 0 0 0 0 0 0 0 0 0 0 0 0 0
13.1330 -2.0760 -14.3220 C 0 0 0 0 0 0 0 0 0 0 0 0 0 0 0 0
13.3850 -1.4620 -15.1960 H 0 0 0 0 0 0 0 0 0 0 0 0 0 0 0 0
12.0850 -2.3710 -14.4560 H 0 0 0 0 0 0 0 0 0 0 0 0 0 0 0 0
13.2930 -1.2600 -13.0390 C 0 0 0 0 0 0 0 0 0 0 0 0 0 0 0 0
13.0330 -1.8830 -12.1750 H 0 0 0 0 0 0 0 0 0 0 0 0 0 0 0 0
14.3420 -0.9640 -12.9210 H 0 0 0 0 0 0 0 0 0 0 0 0 0 0 0 0
12.4080 -0.0110 -13.0530 C 0 0 0 0 0 0 0 0 0 0 0 0 0 0 0 0
12.6730 0.6180 -13.9120 H 0 0 0 0 0 0 0 0 0 0 0 0 0 0 0 0
11.3590 -0.3060 -13.1790 H 0 0 0 0 0 0 0 0 0 0 0 0 0 0 0 0
12.5600 0.7970 -11.7610 C 0 0 0 0 0 0 0 0 0 0 0 0 0 0 0 0
12.3010 0.1630 -10.9040 H 0 0 0 0 0 0 0 0 0 0 0 0 0 0 0 0
13.6090 1.0940 -11.6370 H 0 0 0 0 0 0 0 0 0 0 0 0 0 0 0 0
11.6680 2.0430 -11.7710 C 0 0 0 0 0 0 0 0 0 0 0 0 0 0 0 0

```



|         |         |          |   |   |   |   |   |   |   |   |   |   |   |   |   |
|---------|---------|----------|---|---|---|---|---|---|---|---|---|---|---|---|---|
| 11.9420 | 2.6770  | -12.6230 | H | 0 | 0 | 0 | 0 | 0 | 0 | 0 | 0 | 0 | 0 | 0 | 0 |
| 10.6210 | 1.7420  | -11.8920 | H | 0 | 0 | 0 | 0 | 0 | 0 | 0 | 0 | 0 | 0 | 0 | 0 |
| 11.8400 | 2.7850  | -10.5200 | N | 0 | 0 | 3 | 0 | 0 | 0 | 0 | 0 | 0 | 0 | 0 | 0 |
| 11.6190 | 2.1700  | -9.7360  | H | 0 | 0 | 0 | 0 | 0 | 0 | 0 | 0 | 0 | 0 | 0 | 0 |
| 17.7200 | 9.2190  | -7.1120  | C | 0 | 0 | 0 | 0 | 0 | 0 | 0 | 0 | 0 | 0 | 0 | 0 |
| 16.4550 | 9.6390  | -6.6840  | C | 0 | 0 | 0 | 0 | 0 | 0 | 0 | 0 | 0 | 0 | 0 | 0 |
| 15.6560 | 8.9240  | -6.5020  | H | 0 | 0 | 0 | 0 | 0 | 0 | 0 | 0 | 0 | 0 | 0 | 0 |
| 16.1990 | 10.9970 | -6.4790  | C | 0 | 0 | 0 | 0 | 0 | 0 | 0 | 0 | 0 | 0 | 0 | 0 |
| 15.2160 | 11.3220 | -6.1490  | H | 0 | 0 | 0 | 0 | 0 | 0 | 0 | 0 | 0 | 0 | 0 | 0 |
| 17.2030 | 11.9390 | -6.7010  | C | 0 | 0 | 0 | 0 | 0 | 0 | 0 | 0 | 0 | 0 | 0 | 0 |
| 17.0010 | 12.9960 | -6.5450  | H | 0 | 0 | 0 | 0 | 0 | 0 | 0 | 0 | 0 | 0 | 0 | 0 |
| 18.4660 | 11.5260 | -7.1230  | C | 0 | 0 | 0 | 0 | 0 | 0 | 0 | 0 | 0 | 0 | 0 | 0 |
| 19.2480 | 12.2610 | -7.2960  | H | 0 | 0 | 0 | 0 | 0 | 0 | 0 | 0 | 0 | 0 | 0 | 0 |
| 18.7260 | 10.1700 | -7.3250  | C | 0 | 0 | 0 | 0 | 0 | 0 | 0 | 0 | 0 | 0 | 0 | 0 |
| 19.7170 | 9.8630  | -7.6560  | H | 0 | 0 | 0 | 0 | 0 | 0 | 0 | 0 | 0 | 0 | 0 | 0 |
| 10.9790 | 3.9690  | -10.4810 | C | 0 | 0 | 0 | 0 | 0 | 0 | 0 | 0 | 0 | 0 | 0 | 0 |
| 9.9280  | 3.6570  | -10.4960 | H | 0 | 0 | 0 | 0 | 0 | 0 | 0 | 0 | 0 | 0 | 0 | 0 |
| 11.1560 | 4.5950  | -11.3640 | H | 0 | 0 | 0 | 0 | 0 | 0 | 0 | 0 | 0 | 0 | 0 | 0 |
| 11.2350 | 4.7760  | -9.2150  | C | 0 | 0 | 0 | 0 | 0 | 0 | 0 | 0 | 0 | 0 | 0 | 0 |
| 10.4450 | 5.5230  | -9.0750  | H | 0 | 0 | 0 | 0 | 0 | 0 | 0 | 0 | 0 | 0 | 0 | 0 |
| 11.2180 | 4.1420  | -8.3200  | H | 0 | 0 | 0 | 0 | 0 | 0 | 0 | 0 | 0 | 0 | 0 | 0 |
| 12.5400 | 5.5230  | -9.3060  | C | 0 | 0 | 0 | 0 | 0 | 0 | 0 | 0 | 0 | 0 | 0 | 0 |
| 13.4590 | 4.9910  | -8.4520  | O | 0 | 0 | 0 | 0 | 0 | 0 | 0 | 0 | 0 | 0 | 0 | 0 |
| 14.7440 | 5.6330  | -8.4790  | C | 0 | 0 | 0 | 0 | 0 | 0 | 0 | 0 | 0 | 0 | 0 | 0 |
| 15.1310 | 5.6180  | -9.5070  | H | 0 | 0 | 0 | 0 | 0 | 0 | 0 | 0 | 0 | 0 | 0 | 0 |
| 14.6080 | 6.6780  | -8.1750  | H | 0 | 0 | 0 | 0 | 0 | 0 | 0 | 0 | 0 | 0 | 0 | 0 |
| 15.7440 | 4.9110  | -7.5310  | C | 0 | 0 | 3 | 0 | 0 | 0 | 0 | 0 | 0 | 0 | 0 | 0 |
| 15.1650 | 4.9550  | -6.0920  | C | 0 | 0 | 0 | 0 | 0 | 0 | 0 | 0 | 0 | 0 | 0 | 0 |
| 14.8020 | 5.9630  | -5.8580  | H | 0 | 0 | 0 | 0 | 0 | 0 | 0 | 0 | 0 | 0 | 0 | 0 |
| 14.3240 | 4.2570  | -6.0030  | H | 0 | 0 | 0 | 0 | 0 | 0 | 0 | 0 | 0 | 0 | 0 | 0 |
| 16.1820 | 4.6350  | -5.1270  | O | 0 | 0 | 0 | 0 | 0 | 0 | 0 | 0 | 0 | 0 | 0 | 0 |
| 15.7420 | 4.3120  | -3.8760  | C | 0 | 0 | 0 | 0 | 0 | 0 | 0 | 0 | 0 | 0 | 0 | 0 |
| 16.9330 | 4.0550  | -2.9840  | C | 0 | 0 | 0 | 0 | 0 | 0 | 0 | 0 | 0 | 0 | 0 | 0 |
| 17.5310 | 3.2640  | -3.4420  | H | 0 | 0 | 0 | 0 | 0 | 0 | 0 | 0 | 0 | 0 | 0 | 0 |
| 17.5250 | 4.9770  | -2.9590  | H | 0 | 0 | 0 | 0 | 0 | 0 | 0 | 0 | 0 | 0 | 0 | 0 |
| 16.4910 | 3.6650  | -1.5660  | C | 0 | 0 | 0 | 0 | 0 | 0 | 0 | 0 | 0 | 0 | 0 | 0 |
| 15.9540 | 4.5220  | -1.1350  | H | 0 | 0 | 0 | 0 | 0 | 0 | 0 | 0 | 0 | 0 | 0 | 0 |
| 15.7360 | 2.8690  | -1.6130  | H | 0 | 0 | 0 | 0 | 0 | 0 | 0 | 0 | 0 | 0 | 0 | 0 |
| 12.7300 | 6.4810  | -10.0440 | O | 0 | 0 | 0 | 0 | 0 | 0 | 0 | 0 | 0 | 0 | 0 | 0 |
| 14.5700 | 4.2490  | -3.5330  | O | 0 | 0 | 0 | 0 | 0 | 0 | 0 | 0 | 0 | 0 | 0 | 0 |
| 15.9070 | 3.4400  | -8.0210  | C | 0 | 0 | 0 | 0 | 0 | 0 | 0 | 0 | 0 | 0 | 0 | 0 |
| 14.9300 | 2.9400  | -8.0180  | H | 0 | 0 | 0 | 0 | 0 | 0 | 0 | 0 | 0 | 0 | 0 | 0 |
| 16.2360 | 3.4520  | -9.0690  | H | 0 | 0 | 0 | 0 | 0 | 0 | 0 | 0 | 0 | 0 | 0 | 0 |
| 17.1040 | 5.6500  | -7.6040  | C | 0 | 0 | 0 | 0 | 0 | 0 | 0 | 0 | 0 | 0 | 0 | 0 |
| 17.8350 | 5.2220  | -6.9110  | H | 0 | 0 | 0 | 0 | 0 | 0 | 0 | 0 | 0 | 0 | 0 | 0 |
| 17.5090 | 5.5800  | -8.6220  | H | 0 | 0 | 0 | 0 | 0 | 0 | 0 | 0 | 0 | 0 | 0 | 0 |
| 16.8760 | 2.5570  | -7.2430  | C | 0 | 0 | 0 | 0 | 0 | 0 | 0 | 0 | 0 | 0 | 0 | 0 |
| 16.5310 | 2.3810  | -6.2210  | H | 0 | 0 | 0 | 0 | 0 | 0 | 0 | 0 | 0 | 0 | 0 | 0 |
| 17.8820 | 2.9820  | -7.2090  | H | 0 | 0 | 0 | 0 | 0 | 0 | 0 | 0 | 0 | 0 | 0 | 0 |
| 16.9520 | 1.5790  | -7.7290  | H | 0 | 0 | 0 | 0 | 0 | 0 | 0 | 0 | 0 | 0 | 0 | 0 |
| 16.9200 | 7.0380  | -7.2770  | O | 0 | 0 | 0 | 0 | 0 | 0 | 0 | 0 | 0 | 0 | 0 | 0 |
| 18.0380 | 7.8040  | -7.3630  | C | 0 | 0 | 0 | 0 | 0 | 0 | 0 | 0 | 0 | 0 | 0 | 0 |
| 19.1630 | 7.4040  | -7.6290  | O | 0 | 0 | 0 | 0 | 0 | 0 | 0 | 0 | 0 | 0 | 0 | 0 |
| 24.5880 | 1.5240  | 3.1060   | O | 0 | 0 | 0 | 0 | 0 | 0 | 0 | 0 | 0 | 0 | 0 | 0 |
| 25.0370 | 1.5050  | 3.9690   | H | 0 | 0 | 0 | 0 | 0 | 0 | 0 | 0 | 0 | 0 | 0 | 0 |
| 23.5990 | 2.5430  | 3.1690   | C | 0 | 0 | 0 | 0 | 0 | 0 | 0 | 0 | 0 | 0 | 0 | 0 |
| 22.9930 | 2.3870  | 4.0670   | H | 0 | 0 | 0 | 0 | 0 | 0 | 0 | 0 | 0 | 0 | 0 | 0 |
| 24.0980 | 3.5150  | 3.2360   | H | 0 | 0 | 0 | 0 | 0 | 0 | 0 | 0 | 0 | 0 | 0 | 0 |
| 22.7470 | 2.4440  | 1.9150   | C | 0 | 0 | 0 | 0 | 0 | 0 | 0 | 0 | 0 | 0 | 0 | 0 |
| 23.3820 | 2.5740  | 1.0300   | H | 0 | 0 | 0 | 0 | 0 | 0 | 0 | 0 | 0 | 0 | 0 | 0 |
| 22.3390 | 1.4290  | 1.8450   | H | 0 | 0 | 0 | 0 | 0 | 0 | 0 | 0 | 0 | 0 | 0 | 0 |
| 21.6050 | 3.4540  | 1.9050   | C | 0 | 0 | 0 | 0 | 0 | 0 | 0 | 0 | 0 | 0 | 0 | 0 |
| 20.9740 | 3.3040  | 2.7900   | H | 0 | 0 | 0 | 0 | 0 | 0 | 0 | 0 | 0 | 0 | 0 | 0 |
| 22.0060 | 4.4730  | 1.9570   | H | 0 | 0 | 0 | 0 | 0 | 0 | 0 | 0 | 0 | 0 | 0 | 0 |
| 20.7620 | 3.2920  | 0.6380   | C | 0 | 0 | 0 | 0 | 0 | 0 | 0 | 0 | 0 | 0 | 0 | 0 |
| 21.3810 | 3.5110  | -0.2400  | H | 0 | 0 | 0 | 0 | 0 | 0 | 0 | 0 | 0 | 0 | 0 | 0 |
| 20.4480 | 2.2490  | 0.5560   | H | 0 | 0 | 0 | 0 | 0 | 0 | 0 | 0 | 0 | 0 | 0 | 0 |
| 19.5460 | 4.2170  | 0.6530   | C | 0 | 0 | 0 | 0 | 0 | 0 | 0 | 0 | 0 | 0 | 0 | 0 |
| 18.9100 | 4.0010  | 1.5210   | H | 0 | 0 | 0 | 0 | 0 | 0 | 0 | 0 | 0 | 0 | 0 | 0 |
| 19.9050 | 5.2450  | 0.7910   | H | 0 | 0 | 0 | 0 | 0 | 0 | 0 | 0 | 0 | 0 | 0 | 0 |
| 18.7190 | 4.1770  | -0.6430  | C | 0 | 0 | 0 | 0 | 0 | 0 | 0 | 0 | 0 | 0 | 0 | 0 |
| 18.3530 | 5.2040  | -0.7750  | H | 0 | 0 | 0 | 0 | 0 | 0 | 0 | 0 | 0 | 0 | 0 | 0 |
| 19.3580 | 3.9720  | -1.5080  | H | 0 | 0 | 0 | 0 | 0 | 0 | 0 | 0 | 0 | 0 | 0 | 0 |
| 17.5490 | 3.2990  | -0.6100  | N | 0 | 0 | 3 | 0 | 0 | 0 | 0 | 0 | 0 | 0 | 0 | 0 |
| 17.9370 | -3.2570 | -1.3180  | C | 0 | 0 | 0 | 0 | 0 | 0 | 0 | 0 | 0 | 0 | 0 | 0 |
| 17.7580 | -2.7800 | -0.0130  | C | 0 | 0 | 0 | 0 | 0 | 0 | 0 | 0 | 0 | 0 | 0 | 0 |
| 18.5790 | -2.3340 | 0.5430   | H | 0 | 0 | 0 | 0 | 0 | 0 | 0 | 0 | 0 | 0 | 0 | 0 |
| 16.5060 | -2.8640 | 0.6000   | C | 0 | 0 | 0 | 0 | 0 | 0 | 0 | 0 | 0 | 0 | 0 | 0 |
| 16.3730 | -2.4940 | 1.6140   | H | 0 | 0 | 0 | 0 | 0 | 0 | 0 | 0 | 0 | 0 | 0 | 0 |
| 15.4290 | -3.4240 | -0.0840  | C | 0 | 0 | 0 | 0 | 0 | 0 | 0 | 0 | 0 | 0 | 0 | 0 |
| 14.4550 | -3.4910 | 0.3940   | H | 0 | 0 | 0 | 0 | 0 | 0 | 0 | 0 | 0 | 0 | 0 | 0 |



|         |          |         |   |   |   |   |   |   |   |   |   |   |   |   |
|---------|----------|---------|---|---|---|---|---|---|---|---|---|---|---|---|
| 28.0410 | -5.1160  | 3.4700  | O | 0 | 0 | 0 | 0 | 0 | 0 | 0 | 0 | 0 | 0 | 0 |
| 29.2070 | -5.5020  | 2.7170  | C | 0 | 0 | 0 | 0 | 0 | 0 | 0 | 0 | 0 | 0 | 0 |
| 29.1330 | -6.5300  | 2.3440  | H | 0 | 0 | 0 | 0 | 0 | 0 | 0 | 0 | 0 | 0 | 0 |
| 29.2180 | -4.8560  | 1.8300  | H | 0 | 0 | 0 | 0 | 0 | 0 | 0 | 0 | 0 | 0 | 0 |
| 30.5230 | -5.2920  | 3.5260  | C | 0 | 0 | 3 | 0 | 0 | 0 | 0 | 0 | 0 | 0 | 0 |
| 31.6870 | -5.6220  | 2.5520  | C | 0 | 0 | 0 | 0 | 0 | 0 | 0 | 0 | 0 | 0 | 0 |
| 31.5200 | -6.6060  | 2.0980  | H | 0 | 0 | 0 | 0 | 0 | 0 | 0 | 0 | 0 | 0 | 0 |
| 31.7170 | -4.8830  | 1.7420  | H | 0 | 0 | 0 | 0 | 0 | 0 | 0 | 0 | 0 | 0 | 0 |
| 32.9630 | -5.5880  | 3.2120  | O | 0 | 0 | 0 | 0 | 0 | 0 | 0 | 0 | 0 | 0 | 0 |
| 33.9500 | -6.3410  | 2.6510  | C | 0 | 0 | 0 | 0 | 0 | 0 | 0 | 0 | 0 | 0 | 0 |
| 35.2490 | -6.1730  | 3.3960  | C | 0 | 0 | 0 | 0 | 0 | 0 | 0 | 0 | 0 | 0 | 0 |
| 35.9500 | -5.7290  | 2.6830  | H | 0 | 0 | 0 | 0 | 0 | 0 | 0 | 0 | 0 | 0 | 0 |
| 35.1240 | -5.4610  | 4.2210  | H | 0 | 0 | 0 | 0 | 0 | 0 | 0 | 0 | 0 | 0 | 0 |
| 35.7290 | -7.5230  | 3.9300  | C | 0 | 0 | 0 | 0 | 0 | 0 | 0 | 0 | 0 | 0 | 0 |
| 34.9850 | -7.8420  | 4.6650  | H | 0 | 0 | 0 | 0 | 0 | 0 | 0 | 0 | 0 | 0 | 0 |
| 35.7200 | -8.2810  | 3.1360  | H | 0 | 0 | 0 | 0 | 0 | 0 | 0 | 0 | 0 | 0 | 0 |
| 27.1070 | -7.2120  | 3.2770  | O | 0 | 0 | 0 | 0 | 0 | 0 | 0 | 0 | 0 | 0 | 0 |
| 33.8300 | -7.0380  | 1.6510  | O | 0 | 0 | 0 | 0 | 0 | 0 | 0 | 0 | 0 | 0 | 0 |
| 30.5700 | -3.8120  | 4.0140  | C | 0 | 0 | 0 | 0 | 0 | 0 | 0 | 0 | 0 | 0 | 0 |
| 30.4400 | -3.1460  | 3.1510  | H | 0 | 0 | 0 | 0 | 0 | 0 | 0 | 0 | 0 | 0 | 0 |
| 29.7100 | -3.6250  | 4.6700  | H | 0 | 0 | 0 | 0 | 0 | 0 | 0 | 0 | 0 | 0 | 0 |
| 30.5510 | -6.2470  | 4.7460  | C | 0 | 0 | 0 | 0 | 0 | 0 | 0 | 0 | 0 | 0 | 0 |
| 31.4920 | -6.1720  | 5.2980  | H | 0 | 0 | 0 | 0 | 0 | 0 | 0 | 0 | 0 | 0 | 0 |
| 29.7530 | -5.9880  | 5.4510  | H | 0 | 0 | 0 | 0 | 0 | 0 | 0 | 0 | 0 | 0 | 0 |
| 31.8150 | -3.3600  | 4.7670  | C | 0 | 0 | 0 | 0 | 0 | 0 | 0 | 0 | 0 | 0 | 0 |
| 32.6890 | -3.3160  | 4.1130  | H | 0 | 0 | 0 | 0 | 0 | 0 | 0 | 0 | 0 | 0 | 0 |
| 32.0390 | -4.0050  | 5.6200  | H | 0 | 0 | 0 | 0 | 0 | 0 | 0 | 0 | 0 | 0 | 0 |
| 31.6600 | -2.3470  | 5.1560  | H | 0 | 0 | 0 | 0 | 0 | 0 | 0 | 0 | 0 | 0 | 0 |
| 30.3020 | -7.6080  | 4.3370  | O | 0 | 0 | 0 | 0 | 0 | 0 | 0 | 0 | 0 | 0 | 0 |
| 31.3510 | -8.4660  | 4.3240  | C | 0 | 0 | 0 | 0 | 0 | 0 | 0 | 0 | 0 | 0 | 0 |
| 32.5050 | -8.2110  | 4.6370  | O | 0 | 0 | 0 | 0 | 0 | 0 | 0 | 0 | 0 | 0 | 0 |
| 39.5300 | -4.0890  | 9.7090  | O | 0 | 0 | 0 | 0 | 0 | 0 | 0 | 0 | 0 | 0 | 0 |
| 38.9910 | -4.0520  | 10.5170 | H | 0 | 0 | 0 | 0 | 0 | 0 | 0 | 0 | 0 | 0 | 0 |
| 38.6970 | -4.6040  | 8.6790  | C | 0 | 0 | 0 | 0 | 0 | 0 | 0 | 0 | 0 | 0 | 0 |
| 38.3230 | -5.5840  | 8.9910  | H | 0 | 0 | 0 | 0 | 0 | 0 | 0 | 0 | 0 | 0 | 0 |
| 37.8510 | -3.9230  | 8.5440  | H | 0 | 0 | 0 | 0 | 0 | 0 | 0 | 0 | 0 | 0 | 0 |
| 39.5090 | -4.7220  | 7.3980  | C | 0 | 0 | 0 | 0 | 0 | 0 | 0 | 0 | 0 | 0 | 0 |
| 39.9310 | -3.7430  | 7.1410  | H | 0 | 0 | 0 | 0 | 0 | 0 | 0 | 0 | 0 | 0 | 0 |
| 40.3660 | -5.3840  | 7.5710  | H | 0 | 0 | 0 | 0 | 0 | 0 | 0 | 0 | 0 | 0 | 0 |
| 38.6540 | -5.2510  | 6.2470  | C | 0 | 0 | 0 | 0 | 0 | 0 | 0 | 0 | 0 | 0 | 0 |
| 38.2200 | -6.2080  | 6.5480  | H | 0 | 0 | 0 | 0 | 0 | 0 | 0 | 0 | 0 | 0 | 0 |
| 37.8240 | -4.5580  | 6.0610  | H | 0 | 0 | 0 | 0 | 0 | 0 | 0 | 0 | 0 | 0 | 0 |
| 39.4820 | -5.4230  | 4.9730  | C | 0 | 0 | 0 | 0 | 0 | 0 | 0 | 0 | 0 | 0 | 0 |
| 40.0270 | -4.4890  | 4.7850  | H | 0 | 0 | 0 | 0 | 0 | 0 | 0 | 0 | 0 | 0 | 0 |
| 40.2390 | -6.2020  | 5.1210  | H | 0 | 0 | 0 | 0 | 0 | 0 | 0 | 0 | 0 | 0 | 0 |
| 38.6520 | -5.7310  | 3.7210  | C | 0 | 0 | 0 | 0 | 0 | 0 | 0 | 0 | 0 | 0 | 0 |
| 37.8350 | -5.0070  | 3.6350  | H | 0 | 0 | 0 | 0 | 0 | 0 | 0 | 0 | 0 | 0 | 0 |
| 39.2980 | -5.5580  | 2.8500  | H | 0 | 0 | 0 | 0 | 0 | 0 | 0 | 0 | 0 | 0 | 0 |
| 38.1320 | -7.1740  | 3.6110  | C | 0 | 0 | 0 | 0 | 0 | 0 | 0 | 0 | 0 | 0 | 0 |
| 37.7930 | -7.3550  | 2.5830  | H | 0 | 0 | 0 | 0 | 0 | 0 | 0 | 0 | 0 | 0 | 0 |
| 38.9940 | -7.8420  | 3.7400  | H | 0 | 0 | 0 | 0 | 0 | 0 | 0 | 0 | 0 | 0 | 0 |
| 37.0590 | -7.4750  | 4.5810  | N | 0 | 0 | 3 | 0 | 0 | 0 | 0 | 0 | 0 | 0 | 0 |
| 33.7980 | -5.5440  | 9.3760  | C | 0 | 0 | 0 | 0 | 0 | 0 | 0 | 0 | 0 | 0 | 0 |
| 34.9310 | -6.0950  | 9.9850  | C | 0 | 0 | 0 | 0 | 0 | 0 | 0 | 0 | 0 | 0 | 0 |
| 35.1850 | -7.1450  | 9.8570  | H | 0 | 0 | 0 | 0 | 0 | 0 | 0 | 0 | 0 | 0 | 0 |
| 35.7550 | -5.2950  | 10.7790 | C | 0 | 0 | 0 | 0 | 0 | 0 | 0 | 0 | 0 | 0 | 0 |
| 36.6280 | -5.7270  | 11.2630 | H | 0 | 0 | 0 | 0 | 0 | 0 | 0 | 0 | 0 | 0 | 0 |
| 35.4570 | -3.9440  | 10.9590 | C | 0 | 0 | 0 | 0 | 0 | 0 | 0 | 0 | 0 | 0 | 0 |
| 36.0960 | -3.3230  | 11.5820 | H | 0 | 0 | 0 | 0 | 0 | 0 | 0 | 0 | 0 | 0 | 0 |
| 34.3360 | -3.3880  | 10.3450 | C | 0 | 0 | 0 | 0 | 0 | 0 | 0 | 0 | 0 | 0 | 0 |
| 34.0980 | -2.3380  | 10.4980 | H | 0 | 0 | 0 | 0 | 0 | 0 | 0 | 0 | 0 | 0 | 0 |
| 33.5090 | -4.1840  | 9.5500  | C | 0 | 0 | 0 | 0 | 0 | 0 | 0 | 0 | 0 | 0 | 0 |
| 32.6280 | -3.7430  | 9.0870  | H | 0 | 0 | 0 | 0 | 0 | 0 | 0 | 0 | 0 | 0 | 0 |
| 37.3500 | -8.7480  | 5.2830  | C | 0 | 0 | 0 | 0 | 0 | 0 | 0 | 0 | 0 | 0 | 0 |
| 38.3960 | -8.7130  | 5.6160  | H | 0 | 0 | 0 | 0 | 0 | 0 | 0 | 0 | 0 | 0 | 0 |
| 37.2700 | -9.6020  | 4.5990  | H | 0 | 0 | 0 | 0 | 0 | 0 | 0 | 0 | 0 | 0 | 0 |
| 36.5290 | -8.9350  | 6.5640  | C | 0 | 0 | 0 | 0 | 0 | 0 | 0 | 0 | 0 | 0 | 0 |
| 37.1700 | -9.3820  | 7.3340  | H | 0 | 0 | 0 | 0 | 0 | 0 | 0 | 0 | 0 | 0 | 0 |
| 36.1790 | -7.9680  | 6.9450  | H | 0 | 0 | 0 | 0 | 0 | 0 | 0 | 0 | 0 | 0 | 0 |
| 35.3500 | -9.8640  | 6.4000  | C | 0 | 0 | 0 | 0 | 0 | 0 | 0 | 0 | 0 | 0 | 0 |
| 34.5470 | -9.7460  | 7.4970  | O | 0 | 0 | 0 | 0 | 0 | 0 | 0 | 0 | 0 | 0 | 0 |
| 33.3470 | -10.5340 | 7.4850  | C | 0 | 0 | 0 | 0 | 0 | 0 | 0 | 0 | 0 | 0 | 0 |
| 32.8790 | -10.4550 | 6.4980  | H | 0 | 0 | 0 | 0 | 0 | 0 | 0 | 0 | 0 | 0 | 0 |
| 33.6190 | -11.5820 | 7.6560  | H | 0 | 0 | 0 | 0 | 0 | 0 | 0 | 0 | 0 | 0 | 0 |
| 32.3700 | -10.0320 | 8.5790  | C | 0 | 0 | 3 | 0 | 0 | 0 | 0 | 0 | 0 | 0 | 0 |
| 33.0440 | -10.1640 | 9.9710  | C | 0 | 0 | 0 | 0 | 0 | 0 | 0 | 0 | 0 | 0 | 0 |
| 34.0250 | -9.6760  | 9.9970  | H | 0 | 0 | 0 | 0 | 0 | 0 | 0 | 0 | 0 | 0 | 0 |
| 32.4050 | -9.6940  | 10.7300 | H | 0 | 0 | 0 | 0 | 0 | 0 | 0 | 0 | 0 | 0 | 0 |
| 33.2290 | -11.5490 | 10.2960 | O | 0 | 0 | 0 | 0 | 0 | 0 | 0 | 0 | 0 | 0 | 0 |
| 33.5100 | -11.7950 | 11.6050 | C | 0 | 0 | 0 | 0 | 0 | 0 | 0 | 0 | 0 | 0 | 0 |
| 33.5580 | -13.2770 | 11.8640 | C | 0 | 0 | 0 | 0 | 0 | 0 | 0 | 0 | 0 | 0 | 0 |



|         |         |         |   |   |   |   |   |   |   |   |   |   |   |   |   |
|---------|---------|---------|---|---|---|---|---|---|---|---|---|---|---|---|---|
| 29.4960 | -6.2840 | 11.0620 | C | 0 | 0 | 0 | 0 | 0 | 0 | 0 | 0 | 0 | 0 | 0 | 0 |
| 29.5050 | -5.2030 | 11.2420 | H | 0 | 0 | 0 | 0 | 0 | 0 | 0 | 0 | 0 | 0 | 0 | 0 |
| 30.1820 | -6.5020 | 10.2350 | H | 0 | 0 | 0 | 0 | 0 | 0 | 0 | 0 | 0 | 0 | 0 | 0 |
| 31.8570 | -5.3840 | 12.8720 | C | 0 | 0 | 0 | 0 | 0 | 0 | 0 | 0 | 0 | 0 | 0 | 0 |
| 31.4300 | -4.9820 | 13.7940 | H | 0 | 0 | 0 | 0 | 0 | 0 | 0 | 0 | 0 | 0 | 0 | 0 |
| 31.5820 | -4.7310 | 12.0400 | H | 0 | 0 | 0 | 0 | 0 | 0 | 0 | 0 | 0 | 0 | 0 | 0 |
| 32.9460 | -5.3400 | 12.9790 | H | 0 | 0 | 0 | 0 | 0 | 0 | 0 | 0 | 0 | 0 | 0 | 0 |
| 28.1710 | -6.6790 | 10.6750 | O | 0 | 0 | 0 | 0 | 0 | 0 | 0 | 0 | 0 | 0 | 0 | 0 |
| 27.6850 | -6.0580 | 9.5710  | C | 0 | 0 | 0 | 0 | 0 | 0 | 0 | 0 | 0 | 0 | 0 | 0 |
| 28.2590 | -5.2060 | 8.9080  | O | 0 | 0 | 0 | 0 | 0 | 0 | 0 | 0 | 0 | 0 | 0 | 0 |
| 1       | 2       | 1       | 0 | 0 | 0 | 0 | 0 | 0 | 0 | 0 | 0 | 0 | 0 | 0 | 0 |
| 1       | 3       | 1       | 0 | 0 | 0 | 0 | 0 | 0 | 0 | 0 | 0 | 0 | 0 | 0 | 0 |
| 3       | 4       | 1       | 0 | 0 | 0 | 0 | 0 | 0 | 0 | 0 | 0 | 0 | 0 | 0 | 0 |
| 3       | 5       | 1       | 0 | 0 | 0 | 0 | 0 | 0 | 0 | 0 | 0 | 0 | 0 | 0 | 0 |
| 3       | 6       | 1       | 0 | 0 | 0 | 0 | 0 | 0 | 0 | 0 | 0 | 0 | 0 | 0 | 0 |
| 6       | 7       | 1       | 0 | 0 | 0 | 0 | 0 | 0 | 0 | 0 | 0 | 0 | 0 | 0 | 0 |
| 6       | 8       | 1       | 0 | 0 | 0 | 0 | 0 | 0 | 0 | 0 | 0 | 0 | 0 | 0 | 0 |
| 6       | 9       | 1       | 0 | 0 | 0 | 0 | 0 | 0 | 0 | 0 | 0 | 0 | 0 | 0 | 0 |
| 9       | 10      | 1       | 0 | 0 | 0 | 0 | 0 | 0 | 0 | 0 | 0 | 0 | 0 | 0 | 0 |
| 9       | 11      | 1       | 0 | 0 | 0 | 0 | 0 | 0 | 0 | 0 | 0 | 0 | 0 | 0 | 0 |
| 9       | 12      | 1       | 0 | 0 | 0 | 0 | 0 | 0 | 0 | 0 | 0 | 0 | 0 | 0 | 0 |
| 12      | 13      | 1       | 0 | 0 | 0 | 0 | 0 | 0 | 0 | 0 | 0 | 0 | 0 | 0 | 0 |
| 12      | 14      | 1       | 0 | 0 | 0 | 0 | 0 | 0 | 0 | 0 | 0 | 0 | 0 | 0 | 0 |
| 12      | 15      | 1       | 0 | 0 | 0 | 0 | 0 | 0 | 0 | 0 | 0 | 0 | 0 | 0 | 0 |
| 15      | 16      | 1       | 0 | 0 | 0 | 0 | 0 | 0 | 0 | 0 | 0 | 0 | 0 | 0 | 0 |
| 15      | 17      | 1       | 0 | 0 | 0 | 0 | 0 | 0 | 0 | 0 | 0 | 0 | 0 | 0 | 0 |
| 15      | 18      | 1       | 0 | 0 | 0 | 0 | 0 | 0 | 0 | 0 | 0 | 0 | 0 | 0 | 0 |
| 18      | 19      | 1       | 0 | 0 | 0 | 0 | 0 | 0 | 0 | 0 | 0 | 0 | 0 | 0 | 0 |
| 18      | 20      | 1       | 0 | 0 | 0 | 0 | 0 | 0 | 0 | 0 | 0 | 0 | 0 | 0 | 0 |
| 18      | 21      | 1       | 0 | 0 | 0 | 0 | 0 | 0 | 0 | 0 | 0 | 0 | 0 | 0 | 0 |
| 21      | 22      | 1       | 0 | 0 | 0 | 0 | 0 | 0 | 0 | 0 | 0 | 0 | 0 | 0 | 0 |
| 21      | 34      | 1       | 0 | 0 | 0 | 0 | 0 | 0 | 0 | 0 | 0 | 0 | 0 | 0 | 0 |
| 23      | 24      | 1       | 0 | 0 | 0 | 0 | 0 | 0 | 0 | 0 | 0 | 0 | 0 | 0 | 0 |
| 23      | 32      | 2       | 0 | 0 | 0 | 0 | 0 | 0 | 0 | 0 | 0 | 0 | 0 | 0 | 0 |
| 23      | 70      | 1       | 0 | 0 | 0 | 0 | 0 | 0 | 0 | 0 | 0 | 0 | 0 | 0 | 0 |
| 24      | 25      | 1       | 0 | 0 | 0 | 0 | 0 | 0 | 0 | 0 | 0 | 0 | 0 | 0 | 0 |
| 24      | 26      | 2       | 0 | 0 | 0 | 0 | 0 | 0 | 0 | 0 | 0 | 0 | 0 | 0 | 0 |
| 26      | 27      | 1       | 0 | 0 | 0 | 0 | 0 | 0 | 0 | 0 | 0 | 0 | 0 | 0 | 0 |
| 26      | 28      | 1       | 0 | 0 | 0 | 0 | 0 | 0 | 0 | 0 | 0 | 0 | 0 | 0 | 0 |
| 28      | 29      | 1       | 0 | 0 | 0 | 0 | 0 | 0 | 0 | 0 | 0 | 0 | 0 | 0 | 0 |
| 28      | 30      | 2       | 0 | 0 | 0 | 0 | 0 | 0 | 0 | 0 | 0 | 0 | 0 | 0 | 0 |
| 30      | 31      | 1       | 0 | 0 | 0 | 0 | 0 | 0 | 0 | 0 | 0 | 0 | 0 | 0 | 0 |
| 30      | 32      | 1       | 0 | 0 | 0 | 0 | 0 | 0 | 0 | 0 | 0 | 0 | 0 | 0 | 0 |
| 32      | 33      | 1       | 0 | 0 | 0 | 0 | 0 | 0 | 0 | 0 | 0 | 0 | 0 | 0 | 0 |
| 34      | 35      | 1       | 0 | 0 | 0 | 0 | 0 | 0 | 0 | 0 | 0 | 0 | 0 | 0 | 0 |
| 34      | 36      | 1       | 0 | 0 | 0 | 0 | 0 | 0 | 0 | 0 | 0 | 0 | 0 | 0 | 0 |
| 34      | 37      | 1       | 0 | 0 | 0 | 0 | 0 | 0 | 0 | 0 | 0 | 0 | 0 | 0 | 0 |
| 37      | 38      | 1       | 0 | 0 | 0 | 0 | 0 | 0 | 0 | 0 | 0 | 0 | 0 | 0 | 0 |
| 37      | 39      | 1       | 0 | 0 | 0 | 0 | 0 | 0 | 0 | 0 | 0 | 0 | 0 | 0 | 0 |
| 37      | 40      | 1       | 0 | 0 | 0 | 0 | 0 | 0 | 0 | 0 | 0 | 0 | 0 | 0 | 0 |
| 40      | 41      | 1       | 0 | 0 | 0 | 0 | 0 | 0 | 0 | 0 | 0 | 0 | 0 | 0 | 0 |
| 40      | 57      | 2       | 0 | 0 | 0 | 0 | 0 | 0 | 0 | 0 | 0 | 0 | 0 | 0 | 0 |
| 41      | 42      | 1       | 0 | 0 | 0 | 0 | 0 | 0 | 0 | 0 | 0 | 0 | 0 | 0 | 0 |
| 42      | 43      | 1       | 0 | 0 | 0 | 0 | 0 | 0 | 0 | 0 | 0 | 0 | 0 | 0 | 0 |
| 42      | 44      | 1       | 0 | 0 | 0 | 0 | 0 | 0 | 0 | 0 | 0 | 0 | 0 | 0 | 0 |
| 42      | 45      | 1       | 0 | 0 | 0 | 0 | 0 | 0 | 0 | 0 | 0 | 0 | 0 | 0 | 0 |
| 45      | 46      | 1       | 0 | 0 | 0 | 0 | 0 | 0 | 0 | 0 | 0 | 0 | 0 | 0 | 0 |
| 45      | 59      | 1       | 0 | 0 | 0 | 0 | 0 | 0 | 0 | 0 | 0 | 0 | 0 | 0 | 0 |
| 45      | 62      | 1       | 0 | 0 | 0 | 0 | 0 | 0 | 0 | 0 | 0 | 0 | 0 | 0 | 0 |
| 46      | 47      | 1       | 0 | 0 | 0 | 0 | 0 | 0 | 0 | 0 | 0 | 0 | 0 | 0 | 0 |
| 46      | 48      | 1       | 0 | 0 | 0 | 0 | 0 | 0 | 0 | 0 | 0 | 0 | 0 | 0 | 0 |
| 46      | 49      | 1       | 0 | 0 | 0 | 0 | 0 | 0 | 0 | 0 | 0 | 0 | 0 | 0 | 0 |
| 49      | 50      | 1       | 0 | 0 | 0 | 0 | 0 | 0 | 0 | 0 | 0 | 0 | 0 | 0 | 0 |
| 50      | 51      | 1       | 0 | 0 | 0 | 0 | 0 | 0 | 0 | 0 | 0 | 0 | 0 | 0 | 0 |
| 50      | 58      | 2       | 0 | 0 | 0 | 0 | 0 | 0 | 0 | 0 | 0 | 0 | 0 | 0 | 0 |
| 51      | 52      | 1       | 0 | 0 | 0 | 0 | 0 | 0 | 0 | 0 | 0 | 0 | 0 | 0 | 0 |
| 51      | 53      | 1       | 0 | 0 | 0 | 0 | 0 | 0 | 0 | 0 | 0 | 0 | 0 | 0 | 0 |
| 51      | 54      | 1       | 0 | 0 | 0 | 0 | 0 | 0 | 0 | 0 | 0 | 0 | 0 | 0 | 0 |
| 54      | 55      | 1       | 0 | 0 | 0 | 0 | 0 | 0 | 0 | 0 | 0 | 0 | 0 | 0 | 0 |
| 54      | 56      | 1       | 0 | 0 | 0 | 0 | 0 | 0 | 0 | 0 | 0 | 0 | 0 | 0 | 0 |
| 54      | 92      | 1       | 0 | 0 | 0 | 0 | 0 | 0 | 0 | 0 | 0 | 0 | 0 | 0 | 0 |
| 59      | 60      | 1       | 0 | 0 | 0 | 0 | 0 | 0 | 0 | 0 | 0 | 0 | 0 | 0 | 0 |
| 59      | 61      | 1       | 0 | 0 | 0 | 0 | 0 | 0 | 0 | 0 | 0 | 0 | 0 | 0 | 0 |
| 59      | 65      | 1       | 0 | 0 | 0 | 0 | 0 | 0 | 0 | 0 | 0 | 0 | 0 | 0 | 0 |
| 62      | 63      | 1       | 0 | 0 | 0 | 0 | 0 | 0 | 0 | 0 | 0 | 0 | 0 | 0 | 0 |
| 62      | 64      | 1       | 0 | 0 | 0 | 0 | 0 | 0 | 0 | 0 | 0 | 0 | 0 | 0 | 0 |
| 62      | 69      | 1       | 0 | 0 | 0 | 0 | 0 | 0 | 0 | 0 | 0 | 0 | 0 | 0 | 0 |
| 65      | 66      | 1       | 0 | 0 | 0 | 0 | 0 | 0 | 0 | 0 | 0 | 0 | 0 | 0 | 0 |
| 65      | 67      | 1       | 0 | 0 | 0 | 0 | 0 | 0 | 0 | 0 | 0 | 0 | 0 | 0 | 0 |
| 65      | 68      | 1       | 0 | 0 | 0 | 0 | 0 | 0 | 0 | 0 | 0 | 0 | 0 | 0 | 0 |
| 69      | 70      | 1       | 0 | 0 | 0 | 0 | 0 | 0 | 0 | 0 | 0 | 0 | 0 | 0 | 0 |

|     |     |   |   |   |   |   |
|-----|-----|---|---|---|---|---|
| 70  | 71  | 2 | 0 | 0 | 0 | 0 |
| 72  | 73  | 1 | 0 | 0 | 0 | 0 |
| 72  | 74  | 1 | 0 | 0 | 0 | 0 |
| 74  | 75  | 1 | 0 | 0 | 0 | 0 |
| 74  | 76  | 1 | 0 | 0 | 0 | 0 |
| 74  | 77  | 1 | 0 | 0 | 0 | 0 |
| 77  | 78  | 1 | 0 | 0 | 0 | 0 |
| 77  | 79  | 1 | 0 | 0 | 0 | 0 |
| 77  | 80  | 1 | 0 | 0 | 0 | 0 |
| 80  | 81  | 1 | 0 | 0 | 0 | 0 |
| 80  | 82  | 1 | 0 | 0 | 0 | 0 |
| 80  | 83  | 1 | 0 | 0 | 0 | 0 |
| 83  | 84  | 1 | 0 | 0 | 0 | 0 |
| 83  | 85  | 1 | 0 | 0 | 0 | 0 |
| 83  | 86  | 1 | 0 | 0 | 0 | 0 |
| 86  | 87  | 1 | 0 | 0 | 0 | 0 |
| 86  | 88  | 1 | 0 | 0 | 0 | 0 |
| 86  | 89  | 1 | 0 | 0 | 0 | 0 |
| 89  | 90  | 1 | 0 | 0 | 0 | 0 |
| 89  | 91  | 1 | 0 | 0 | 0 | 0 |
| 89  | 92  | 1 | 0 | 0 | 0 | 0 |
| 92  | 104 | 1 | 0 | 0 | 0 | 0 |
| 93  | 94  | 1 | 0 | 0 | 0 | 0 |
| 93  | 102 | 2 | 0 | 0 | 0 | 0 |
| 93  | 140 | 1 | 0 | 0 | 0 | 0 |
| 94  | 95  | 1 | 0 | 0 | 0 | 0 |
| 94  | 96  | 2 | 0 | 0 | 0 | 0 |
| 96  | 97  | 1 | 0 | 0 | 0 | 0 |
| 96  | 98  | 1 | 0 | 0 | 0 | 0 |
| 98  | 99  | 1 | 0 | 0 | 0 | 0 |
| 98  | 100 | 2 | 0 | 0 | 0 | 0 |
| 100 | 101 | 1 | 0 | 0 | 0 | 0 |
| 100 | 102 | 1 | 0 | 0 | 0 | 0 |
| 102 | 103 | 1 | 0 | 0 | 0 | 0 |
| 104 | 105 | 1 | 0 | 0 | 0 | 0 |
| 104 | 106 | 1 | 0 | 0 | 0 | 0 |
| 104 | 107 | 1 | 0 | 0 | 0 | 0 |
| 107 | 108 | 1 | 0 | 0 | 0 | 0 |
| 107 | 109 | 1 | 0 | 0 | 0 | 0 |
| 107 | 110 | 1 | 0 | 0 | 0 | 0 |
| 110 | 111 | 1 | 0 | 0 | 0 | 0 |
| 110 | 127 | 2 | 0 | 0 | 0 | 0 |
| 111 | 112 | 1 | 0 | 0 | 0 | 0 |
| 112 | 113 | 1 | 0 | 0 | 0 | 0 |
| 112 | 114 | 1 | 0 | 0 | 0 | 0 |
| 112 | 115 | 1 | 0 | 0 | 0 | 0 |
| 115 | 116 | 1 | 0 | 0 | 0 | 0 |
| 115 | 129 | 1 | 0 | 0 | 0 | 0 |
| 115 | 132 | 1 | 0 | 0 | 0 | 0 |
| 116 | 117 | 1 | 0 | 0 | 0 | 0 |
| 116 | 118 | 1 | 0 | 0 | 0 | 0 |
| 116 | 119 | 1 | 0 | 0 | 0 | 0 |
| 119 | 120 | 1 | 0 | 0 | 0 | 0 |
| 120 | 121 | 1 | 0 | 0 | 0 | 0 |
| 120 | 128 | 2 | 0 | 0 | 0 | 0 |
| 121 | 122 | 1 | 0 | 0 | 0 | 0 |
| 121 | 123 | 1 | 0 | 0 | 0 | 0 |
| 121 | 124 | 1 | 0 | 0 | 0 | 0 |
| 124 | 125 | 1 | 0 | 0 | 0 | 0 |
| 124 | 126 | 1 | 0 | 0 | 0 | 0 |
| 124 | 162 | 1 | 0 | 0 | 0 | 0 |
| 129 | 130 | 1 | 0 | 0 | 0 | 0 |
| 129 | 131 | 1 | 0 | 0 | 0 | 0 |
| 129 | 135 | 1 | 0 | 0 | 0 | 0 |
| 132 | 133 | 1 | 0 | 0 | 0 | 0 |
| 132 | 134 | 1 | 0 | 0 | 0 | 0 |
| 132 | 139 | 1 | 0 | 0 | 0 | 0 |
| 135 | 136 | 1 | 0 | 0 | 0 | 0 |
| 135 | 137 | 1 | 0 | 0 | 0 | 0 |
| 135 | 138 | 1 | 0 | 0 | 0 | 0 |
| 139 | 140 | 1 | 0 | 0 | 0 | 0 |
| 140 | 141 | 2 | 0 | 0 | 0 | 0 |
| 142 | 143 | 1 | 0 | 0 | 0 | 0 |
| 142 | 144 | 1 | 0 | 0 | 0 | 0 |
| 144 | 145 | 1 | 0 | 0 | 0 | 0 |
| 144 | 146 | 1 | 0 | 0 | 0 | 0 |
| 144 | 147 | 1 | 0 | 0 | 0 | 0 |
| 147 | 148 | 1 | 0 | 0 | 0 | 0 |
| 147 | 149 | 1 | 0 | 0 | 0 | 0 |
| 147 | 150 | 1 | 0 | 0 | 0 | 0 |
| 150 | 151 | 1 | 0 | 0 | 0 | 0 |

|        |   |   |   |   |   |
|--------|---|---|---|---|---|
| 150152 | 1 | 0 | 0 | 0 | 0 |
| 150153 | 1 | 0 | 0 | 0 | 0 |
| 153154 | 1 | 0 | 0 | 0 | 0 |
| 153155 | 1 | 0 | 0 | 0 | 0 |
| 153156 | 1 | 0 | 0 | 0 | 0 |
| 156157 | 1 | 0 | 0 | 0 | 0 |
| 156158 | 1 | 0 | 0 | 0 | 0 |
| 156159 | 1 | 0 | 0 | 0 | 0 |
| 159160 | 1 | 0 | 0 | 0 | 0 |
| 159161 | 1 | 0 | 0 | 0 | 0 |
| 159162 | 1 | 0 | 0 | 0 | 0 |
| 162174 | 1 | 0 | 0 | 0 | 0 |
| 163164 | 1 | 0 | 0 | 0 | 0 |
| 163172 | 2 | 0 | 0 | 0 | 0 |
| 163210 | 1 | 0 | 0 | 0 | 0 |
| 164165 | 1 | 0 | 0 | 0 | 0 |
| 164166 | 2 | 0 | 0 | 0 | 0 |
| 166167 | 1 | 0 | 0 | 0 | 0 |
| 166168 | 1 | 0 | 0 | 0 | 0 |
| 168169 | 1 | 0 | 0 | 0 | 0 |
| 168170 | 2 | 0 | 0 | 0 | 0 |
| 170171 | 1 | 0 | 0 | 0 | 0 |
| 170172 | 1 | 0 | 0 | 0 | 0 |
| 172173 | 1 | 0 | 0 | 0 | 0 |
| 174175 | 1 | 0 | 0 | 0 | 0 |
| 174176 | 1 | 0 | 0 | 0 | 0 |
| 174177 | 1 | 0 | 0 | 0 | 0 |
| 177178 | 1 | 0 | 0 | 0 | 0 |
| 177179 | 1 | 0 | 0 | 0 | 0 |
| 177180 | 1 | 0 | 0 | 0 | 0 |
| 180181 | 1 | 0 | 0 | 0 | 0 |
| 180197 | 2 | 0 | 0 | 0 | 0 |
| 181182 | 1 | 0 | 0 | 0 | 0 |
| 182183 | 1 | 0 | 0 | 0 | 0 |
| 182184 | 1 | 0 | 0 | 0 | 0 |
| 182185 | 1 | 0 | 0 | 0 | 0 |
| 185186 | 1 | 0 | 0 | 0 | 0 |
| 185199 | 1 | 0 | 0 | 0 | 0 |
| 185202 | 1 | 0 | 0 | 0 | 0 |
| 186187 | 1 | 0 | 0 | 0 | 0 |
| 186188 | 1 | 0 | 0 | 0 | 0 |
| 186189 | 1 | 0 | 0 | 0 | 0 |
| 189190 | 1 | 0 | 0 | 0 | 0 |
| 190191 | 1 | 0 | 0 | 0 | 0 |
| 190198 | 2 | 0 | 0 | 0 | 0 |
| 191192 | 1 | 0 | 0 | 0 | 0 |
| 191193 | 1 | 0 | 0 | 0 | 0 |
| 191194 | 1 | 0 | 0 | 0 | 0 |
| 194195 | 1 | 0 | 0 | 0 | 0 |
| 194196 | 1 | 0 | 0 | 0 | 0 |
| 194232 | 1 | 0 | 0 | 0 | 0 |
| 199200 | 1 | 0 | 0 | 0 | 0 |
| 199201 | 1 | 0 | 0 | 0 | 0 |
| 199205 | 1 | 0 | 0 | 0 | 0 |
| 202203 | 1 | 0 | 0 | 0 | 0 |
| 202204 | 1 | 0 | 0 | 0 | 0 |
| 202209 | 1 | 0 | 0 | 0 | 0 |
| 205206 | 1 | 0 | 0 | 0 | 0 |
| 205207 | 1 | 0 | 0 | 0 | 0 |
| 205208 | 1 | 0 | 0 | 0 | 0 |
| 209210 | 1 | 0 | 0 | 0 | 0 |
| 210211 | 2 | 0 | 0 | 0 | 0 |
| 212213 | 1 | 0 | 0 | 0 | 0 |
| 212214 | 1 | 0 | 0 | 0 | 0 |
| 214215 | 1 | 0 | 0 | 0 | 0 |
| 214216 | 1 | 0 | 0 | 0 | 0 |
| 214217 | 1 | 0 | 0 | 0 | 0 |
| 217218 | 1 | 0 | 0 | 0 | 0 |
| 217219 | 1 | 0 | 0 | 0 | 0 |
| 217220 | 1 | 0 | 0 | 0 | 0 |
| 220221 | 1 | 0 | 0 | 0 | 0 |
| 220222 | 1 | 0 | 0 | 0 | 0 |
| 220223 | 1 | 0 | 0 | 0 | 0 |
| 223224 | 1 | 0 | 0 | 0 | 0 |
| 223225 | 1 | 0 | 0 | 0 | 0 |
| 223226 | 1 | 0 | 0 | 0 | 0 |
| 226227 | 1 | 0 | 0 | 0 | 0 |
| 226228 | 1 | 0 | 0 | 0 | 0 |
| 226229 | 1 | 0 | 0 | 0 | 0 |
| 229230 | 1 | 0 | 0 | 0 | 0 |
| 229231 | 1 | 0 | 0 | 0 | 0 |

|        |   |   |   |   |   |
|--------|---|---|---|---|---|
| 229232 | 1 | 0 | 0 | 0 | 0 |
| 232244 | 1 | 0 | 0 | 0 | 0 |
| 233234 | 1 | 0 | 0 | 0 | 0 |
| 233242 | 2 | 0 | 0 | 0 | 0 |
| 233280 | 1 | 0 | 0 | 0 | 0 |
| 234235 | 1 | 0 | 0 | 0 | 0 |
| 234236 | 2 | 0 | 0 | 0 | 0 |
| 236237 | 1 | 0 | 0 | 0 | 0 |
| 236238 | 1 | 0 | 0 | 0 | 0 |
| 238239 | 1 | 0 | 0 | 0 | 0 |
| 238240 | 2 | 0 | 0 | 0 | 0 |
| 240241 | 1 | 0 | 0 | 0 | 0 |
| 240242 | 1 | 0 | 0 | 0 | 0 |
| 242243 | 1 | 0 | 0 | 0 | 0 |
| 244245 | 1 | 0 | 0 | 0 | 0 |
| 244246 | 1 | 0 | 0 | 0 | 0 |
| 244247 | 1 | 0 | 0 | 0 | 0 |
| 247248 | 1 | 0 | 0 | 0 | 0 |
| 247249 | 1 | 0 | 0 | 0 | 0 |
| 247250 | 1 | 0 | 0 | 0 | 0 |
| 250251 | 1 | 0 | 0 | 0 | 0 |
| 250267 | 2 | 0 | 0 | 0 | 0 |
| 251252 | 1 | 0 | 0 | 0 | 0 |
| 252253 | 1 | 0 | 0 | 0 | 0 |
| 252254 | 1 | 0 | 0 | 0 | 0 |
| 252255 | 1 | 0 | 0 | 0 | 0 |
| 255256 | 1 | 0 | 0 | 0 | 0 |
| 255269 | 1 | 0 | 0 | 0 | 0 |
| 255272 | 1 | 0 | 0 | 0 | 0 |
| 256257 | 1 | 0 | 0 | 0 | 0 |
| 256258 | 1 | 0 | 0 | 0 | 0 |
| 256259 | 1 | 0 | 0 | 0 | 0 |
| 259260 | 1 | 0 | 0 | 0 | 0 |
| 260261 | 1 | 0 | 0 | 0 | 0 |
| 260268 | 2 | 0 | 0 | 0 | 0 |
| 261262 | 1 | 0 | 0 | 0 | 0 |
| 261263 | 1 | 0 | 0 | 0 | 0 |
| 261264 | 1 | 0 | 0 | 0 | 0 |
| 264265 | 1 | 0 | 0 | 0 | 0 |
| 264266 | 1 | 0 | 0 | 0 | 0 |
| 264302 | 1 | 0 | 0 | 0 | 0 |
| 269270 | 1 | 0 | 0 | 0 | 0 |
| 269271 | 1 | 0 | 0 | 0 | 0 |
| 269275 | 1 | 0 | 0 | 0 | 0 |
| 272273 | 1 | 0 | 0 | 0 | 0 |
| 272274 | 1 | 0 | 0 | 0 | 0 |
| 272279 | 1 | 0 | 0 | 0 | 0 |
| 275276 | 1 | 0 | 0 | 0 | 0 |
| 275277 | 1 | 0 | 0 | 0 | 0 |
| 275278 | 1 | 0 | 0 | 0 | 0 |
| 279280 | 1 | 0 | 0 | 0 | 0 |
| 280281 | 2 | 0 | 0 | 0 | 0 |
| 282283 | 1 | 0 | 0 | 0 | 0 |
| 282284 | 1 | 0 | 0 | 0 | 0 |
| 284285 | 1 | 0 | 0 | 0 | 0 |
| 284286 | 1 | 0 | 0 | 0 | 0 |
| 284287 | 1 | 0 | 0 | 0 | 0 |
| 287288 | 1 | 0 | 0 | 0 | 0 |
| 287289 | 1 | 0 | 0 | 0 | 0 |
| 287290 | 1 | 0 | 0 | 0 | 0 |
| 290291 | 1 | 0 | 0 | 0 | 0 |
| 290292 | 1 | 0 | 0 | 0 | 0 |
| 290293 | 1 | 0 | 0 | 0 | 0 |
| 293294 | 1 | 0 | 0 | 0 | 0 |
| 293295 | 1 | 0 | 0 | 0 | 0 |
| 293296 | 1 | 0 | 0 | 0 | 0 |
| 296297 | 1 | 0 | 0 | 0 | 0 |
| 296298 | 1 | 0 | 0 | 0 | 0 |
| 296299 | 1 | 0 | 0 | 0 | 0 |
| 299300 | 1 | 0 | 0 | 0 | 0 |
| 299301 | 1 | 0 | 0 | 0 | 0 |
| 299302 | 1 | 0 | 0 | 0 | 0 |
| 302314 | 1 | 0 | 0 | 0 | 0 |
| 303304 | 1 | 0 | 0 | 0 | 0 |
| 303312 | 2 | 0 | 0 | 0 | 0 |
| 303351 | 1 | 0 | 0 | 0 | 0 |
| 304305 | 1 | 0 | 0 | 0 | 0 |
| 304306 | 2 | 0 | 0 | 0 | 0 |
| 306307 | 1 | 0 | 0 | 0 | 0 |
| 306308 | 1 | 0 | 0 | 0 | 0 |
| 308309 | 1 | 0 | 0 | 0 | 0 |



```

308310 2 0 0 0 0
310311 1 0 0 0 0
310312 1 0 0 0 0
312313 1 0 0 0 0
314315 1 0 0 0 0
314316 1 0 0 0 0
314317 1 0 0 0 0
317318 1 0 0 0 0
317319 1 0 0 0 0
317320 1 0 0 0 0
320321 1 0 0 0 0
320338 2 0 0 0 0
321322 1 0 0 0 0
322323 1 0 0 0 0
322324 1 0 0 0 0
322325 1 0 0 0 0
325326 1 0 0 0 0
325340 1 0 0 0 0
325343 1 0 0 0 0
326327 1 0 0 0 0
326328 1 0 0 0 0
326329 1 0 0 0 0
329330 1 0 0 0 0
330331 1 0 0 0 0
330339 2 0 0 0 0
331332 1 0 0 0 0
331333 1 0 0 0 0
331334 1 0 0 0 0
334335 1 0 0 0 0
334336 1 0 0 0 0
334337 1 0 0 0 0
340341 1 0 0 0 0
340342 1 0 0 0 0
340346 1 0 0 0 0
343344 1 0 0 0 0
343345 1 0 0 0 0
343350 1 0 0 0 0
346347 1 0 0 0 0
346348 1 0 0 0 0
346349 1 0 0 0 0
350351 1 0 0 0 0
351352 2 0 0 0 0

```

```

M END
> <NAME>
AA36_1

```

```

$$$$
AA61_1
MOE2012 3D

```

```

357361 0 0 1 0 0 0 0 0999 V2000
21.6850 -6.2180 -6.5550 C 0 0 0 0 0 0 0 0 0 0 0 0 0 0 0 0
21.0680 -7.1230 -6.5930 H 0 0 0 0 0 0 0 0 0 0 0 0 0 0 0 0
21.1340 -5.4080 -7.0470 H 0 0 0 0 0 0 0 0 0 0 0 0 0 0 0 0
21.9850 -5.8670 -5.1680 N 0 0 3 0 0 0 0 0 0 0 0 0 0 0 0 0
22.5830 -5.0400 -5.1470 H 0 0 0 0 0 0 0 0 0 0 0 0 0 0 0 0
20.7530 -5.6000 -4.4140 C 0 0 0 0 0 0 0 0 0 0 0 0 0 0 0 0
20.2110 -4.7620 -4.8700 H 0 0 0 0 0 0 0 0 0 0 0 0 0 0 0 0
20.1070 -6.4820 -4.4630 H 0 0 0 0 0 0 0 0 0 0 0 0 0 0 0 0
21.0800 -5.2520 -2.9450 C 0 0 0 0 0 0 0 0 0 0 0 0 0 0 0 0
21.6570 -6.0590 -2.4740 H 0 0 0 0 0 0 0 0 0 0 0 0 0 0 0 0
21.7410 -4.3770 -2.9680 H 0 0 0 0 0 0 0 0 0 0 0 0 0 0 0 0
19.8590 -4.9540 -2.1580 N 0 0 3 0 0 0 0 0 0 0 0 0 0 0 0 0
20.1880 -4.1340 -0.9740 C 0 0 0 0 0 0 0 0 0 0 0 0 0 0 0 0
19.3650 -4.1560 -0.2530 H 0 0 0 0 0 0 0 0 0 0 0 0 0 0 0 0
21.0690 -4.5270 -0.4520 H 0 0 0 0 0 0 0 0 0 0 0 0 0 0 0 0
22.9790 -6.4720 -7.3140 C 0 0 0 0 0 0 0 0 0 0 0 0 0 0 0 0
23.6140 -5.5800 -7.3270 H 0 0 0 0 0 0 0 0 0 0 0 0 0 0 0 0
23.5480 -7.2930 -6.8630 H 0 0 0 0 0 0 0 0 0 0 0 0 0 0 0 0
22.7600 -6.7440 -8.3520 H 0 0 0 0 0 0 0 0 0 0 0 0 0 0 0 0
20.3940 -2.6660 -1.3340 C 0 0 0 0 0 0 0 0 0 0 0 0 0 0 0 0
19.5230 -2.2650 -1.8640 H 0 0 0 0 0 0 0 0 0 0 0 0 0 0 0 0
21.2780 -2.5090 -1.9590 H 0 0 0 0 0 0 0 0 0 0 0 0 0 0 0 0
20.5290 -2.0750 -0.4220 H 0 0 0 0 0 0 0 0 0 0 0 0 0 0 0 0
17.6410 -2.2250 5.5640 C 0 0 0 0 0 0 0 0 0 0 0 0 0 0 0 0
18.8600 -2.5600 4.9610 C 0 0 0 0 0 0 0 0 0 0 0 0 0 0 0 0
18.9340 -2.7250 3.8890 H 0 0 0 0 0 0 0 0 0 0 0 0 0 0 0 0
20.0170 -2.6770 5.7350 C 0 0 0 0 0 0 0 0 0 0 0 0 0 0 0 0
20.9610 -2.9360 5.2620 H 0 0 0 0 0 0 0 0 0 0 0 0 0 0 0 0
19.9630 -2.4620 7.1110 C 0 0 0 0 0 0 0 0 0 0 0 0 0 0 0 0
20.8640 -2.5560 7.7120 H 0 0 0 0 0 0 0 0 0 0 0 0 0 0 0 0

```











|        |    |   |   |   |   |   |
|--------|----|---|---|---|---|---|
| 77     | 78 | 1 | 0 | 0 | 0 | 0 |
| 77     | 79 | 1 | 0 | 0 | 0 | 0 |
| 77     | 80 | 1 | 0 | 0 | 0 | 0 |
| 80     | 81 | 1 | 0 | 0 | 0 | 0 |
| 80     | 82 | 1 | 0 | 0 | 0 | 0 |
| 80     | 83 | 1 | 0 | 0 | 0 | 0 |
| 83     | 84 | 1 | 0 | 0 | 0 | 0 |
| 83106  |    | 1 | 0 | 0 | 0 | 0 |
| 84     | 85 | 1 | 0 | 0 | 0 | 0 |
| 84     | 86 | 1 | 0 | 0 | 0 | 0 |
| 84     | 91 | 1 | 0 | 0 | 0 | 0 |
| 87     | 88 | 1 | 0 | 0 | 0 | 0 |
| 87     | 89 | 1 | 0 | 0 | 0 | 0 |
| 87     | 90 | 1 | 0 | 0 | 0 | 0 |
| 91     | 92 | 1 | 0 | 0 | 0 | 0 |
| 91     | 93 | 1 | 0 | 0 | 0 | 0 |
| 91     | 94 | 1 | 0 | 0 | 0 | 0 |
| 95     | 96 | 1 | 0 | 0 | 0 | 0 |
| 95104  |    | 2 | 0 | 0 | 0 | 0 |
| 95142  |    | 1 | 0 | 0 | 0 | 0 |
| 96     | 97 | 1 | 0 | 0 | 0 | 0 |
| 96     | 98 | 2 | 0 | 0 | 0 | 0 |
| 98     | 99 | 1 | 0 | 0 | 0 | 0 |
| 98100  |    | 1 | 0 | 0 | 0 | 0 |
| 100101 |    | 1 | 0 | 0 | 0 | 0 |
| 100102 |    | 2 | 0 | 0 | 0 | 0 |
| 102103 |    | 1 | 0 | 0 | 0 | 0 |
| 102104 |    | 1 | 0 | 0 | 0 | 0 |
| 104105 |    | 1 | 0 | 0 | 0 | 0 |
| 106107 |    | 1 | 0 | 0 | 0 | 0 |
| 106108 |    | 1 | 0 | 0 | 0 | 0 |
| 106109 |    | 1 | 0 | 0 | 0 | 0 |
| 109110 |    | 1 | 0 | 0 | 0 | 0 |
| 109111 |    | 1 | 0 | 0 | 0 | 0 |
| 109112 |    | 1 | 0 | 0 | 0 | 0 |
| 112113 |    | 1 | 0 | 0 | 0 | 0 |
| 112129 |    | 2 | 0 | 0 | 0 | 0 |
| 113114 |    | 1 | 0 | 0 | 0 | 0 |
| 114115 |    | 1 | 0 | 0 | 0 | 0 |
| 114116 |    | 1 | 0 | 0 | 0 | 0 |
| 114117 |    | 1 | 0 | 0 | 0 | 0 |
| 117118 |    | 1 | 0 | 0 | 0 | 0 |
| 117131 |    | 1 | 0 | 0 | 0 | 0 |
| 117134 |    | 1 | 0 | 0 | 0 | 0 |
| 118119 |    | 1 | 0 | 0 | 0 | 0 |
| 118120 |    | 1 | 0 | 0 | 0 | 0 |
| 118121 |    | 1 | 0 | 0 | 0 | 0 |
| 121122 |    | 1 | 0 | 0 | 0 | 0 |
| 122123 |    | 1 | 0 | 0 | 0 | 0 |
| 122130 |    | 2 | 0 | 0 | 0 | 0 |
| 123124 |    | 1 | 0 | 0 | 0 | 0 |
| 123125 |    | 1 | 0 | 0 | 0 | 0 |
| 123126 |    | 1 | 0 | 0 | 0 | 0 |
| 126127 |    | 1 | 0 | 0 | 0 | 0 |
| 126128 |    | 1 | 0 | 0 | 0 | 0 |
| 126147 |    | 1 | 0 | 0 | 0 | 0 |
| 131132 |    | 1 | 0 | 0 | 0 | 0 |
| 131133 |    | 1 | 0 | 0 | 0 | 0 |
| 131137 |    | 1 | 0 | 0 | 0 | 0 |
| 134135 |    | 1 | 0 | 0 | 0 | 0 |
| 134136 |    | 1 | 0 | 0 | 0 | 0 |
| 134141 |    | 1 | 0 | 0 | 0 | 0 |
| 137138 |    | 1 | 0 | 0 | 0 | 0 |
| 137139 |    | 1 | 0 | 0 | 0 | 0 |
| 137140 |    | 1 | 0 | 0 | 0 | 0 |
| 141142 |    | 1 | 0 | 0 | 0 | 0 |
| 142143 |    | 2 | 0 | 0 | 0 | 0 |
| 144145 |    | 1 | 0 | 0 | 0 | 0 |
| 144146 |    | 1 | 0 | 0 | 0 | 0 |
| 144147 |    | 1 | 0 | 0 | 0 | 0 |
| 144158 |    | 1 | 0 | 0 | 0 | 0 |
| 147148 |    | 1 | 0 | 0 | 0 | 0 |
| 148149 |    | 1 | 0 | 0 | 0 | 0 |
| 148150 |    | 1 | 0 | 0 | 0 | 0 |
| 148151 |    | 1 | 0 | 0 | 0 | 0 |
| 151152 |    | 1 | 0 | 0 | 0 | 0 |
| 151153 |    | 1 | 0 | 0 | 0 | 0 |
| 151154 |    | 1 | 0 | 0 | 0 | 0 |
| 154155 |    | 1 | 0 | 0 | 0 | 0 |
| 154177 |    | 1 | 0 | 0 | 0 | 0 |
| 155156 |    | 1 | 0 | 0 | 0 | 0 |

|        |   |   |   |   |   |
|--------|---|---|---|---|---|
| 155157 | 1 | 0 | 0 | 0 | 0 |
| 155162 | 1 | 0 | 0 | 0 | 0 |
| 158159 | 1 | 0 | 0 | 0 | 0 |
| 158160 | 1 | 0 | 0 | 0 | 0 |
| 158161 | 1 | 0 | 0 | 0 | 0 |
| 162163 | 1 | 0 | 0 | 0 | 0 |
| 162164 | 1 | 0 | 0 | 0 | 0 |
| 162165 | 1 | 0 | 0 | 0 | 0 |
| 166167 | 1 | 0 | 0 | 0 | 0 |
| 166175 | 2 | 0 | 0 | 0 | 0 |
| 166213 | 1 | 0 | 0 | 0 | 0 |
| 167168 | 1 | 0 | 0 | 0 | 0 |
| 167169 | 2 | 0 | 0 | 0 | 0 |
| 169170 | 1 | 0 | 0 | 0 | 0 |
| 169171 | 1 | 0 | 0 | 0 | 0 |
| 171172 | 1 | 0 | 0 | 0 | 0 |
| 171173 | 2 | 0 | 0 | 0 | 0 |
| 173174 | 1 | 0 | 0 | 0 | 0 |
| 173175 | 1 | 0 | 0 | 0 | 0 |
| 175176 | 1 | 0 | 0 | 0 | 0 |
| 177178 | 1 | 0 | 0 | 0 | 0 |
| 177179 | 1 | 0 | 0 | 0 | 0 |
| 177180 | 1 | 0 | 0 | 0 | 0 |
| 180181 | 1 | 0 | 0 | 0 | 0 |
| 180182 | 1 | 0 | 0 | 0 | 0 |
| 180183 | 1 | 0 | 0 | 0 | 0 |
| 183184 | 1 | 0 | 0 | 0 | 0 |
| 183200 | 2 | 0 | 0 | 0 | 0 |
| 184185 | 1 | 0 | 0 | 0 | 0 |
| 185186 | 1 | 0 | 0 | 0 | 0 |
| 185187 | 1 | 0 | 0 | 0 | 0 |
| 185188 | 1 | 0 | 0 | 0 | 0 |
| 188189 | 1 | 0 | 0 | 0 | 0 |
| 188202 | 1 | 0 | 0 | 0 | 0 |
| 188205 | 1 | 0 | 0 | 0 | 0 |
| 189190 | 1 | 0 | 0 | 0 | 0 |
| 189191 | 1 | 0 | 0 | 0 | 0 |
| 189192 | 1 | 0 | 0 | 0 | 0 |
| 192193 | 1 | 0 | 0 | 0 | 0 |
| 193194 | 1 | 0 | 0 | 0 | 0 |
| 193201 | 2 | 0 | 0 | 0 | 0 |
| 194195 | 1 | 0 | 0 | 0 | 0 |
| 194196 | 1 | 0 | 0 | 0 | 0 |
| 194197 | 1 | 0 | 0 | 0 | 0 |
| 197198 | 1 | 0 | 0 | 0 | 0 |
| 197199 | 1 | 0 | 0 | 0 | 0 |
| 197218 | 1 | 0 | 0 | 0 | 0 |
| 202203 | 1 | 0 | 0 | 0 | 0 |
| 202204 | 1 | 0 | 0 | 0 | 0 |
| 202208 | 1 | 0 | 0 | 0 | 0 |
| 205206 | 1 | 0 | 0 | 0 | 0 |
| 205207 | 1 | 0 | 0 | 0 | 0 |
| 205212 | 1 | 0 | 0 | 0 | 0 |
| 208209 | 1 | 0 | 0 | 0 | 0 |
| 208210 | 1 | 0 | 0 | 0 | 0 |
| 208211 | 1 | 0 | 0 | 0 | 0 |
| 212213 | 1 | 0 | 0 | 0 | 0 |
| 213214 | 2 | 0 | 0 | 0 | 0 |
| 215216 | 1 | 0 | 0 | 0 | 0 |
| 215217 | 1 | 0 | 0 | 0 | 0 |
| 215218 | 1 | 0 | 0 | 0 | 0 |
| 215229 | 1 | 0 | 0 | 0 | 0 |
| 218219 | 1 | 0 | 0 | 0 | 0 |
| 219220 | 1 | 0 | 0 | 0 | 0 |
| 219221 | 1 | 0 | 0 | 0 | 0 |
| 219222 | 1 | 0 | 0 | 0 | 0 |
| 222223 | 1 | 0 | 0 | 0 | 0 |
| 222224 | 1 | 0 | 0 | 0 | 0 |
| 222225 | 1 | 0 | 0 | 0 | 0 |
| 225226 | 1 | 0 | 0 | 0 | 0 |
| 225248 | 1 | 0 | 0 | 0 | 0 |
| 226227 | 1 | 0 | 0 | 0 | 0 |
| 226228 | 1 | 0 | 0 | 0 | 0 |
| 226233 | 1 | 0 | 0 | 0 | 0 |
| 229230 | 1 | 0 | 0 | 0 | 0 |
| 229231 | 1 | 0 | 0 | 0 | 0 |
| 229232 | 1 | 0 | 0 | 0 | 0 |
| 233234 | 1 | 0 | 0 | 0 | 0 |
| 233235 | 1 | 0 | 0 | 0 | 0 |
| 233236 | 1 | 0 | 0 | 0 | 0 |
| 237238 | 1 | 0 | 0 | 0 | 0 |



|        |   |   |   |   |   |
|--------|---|---|---|---|---|
| 237246 | 2 | 0 | 0 | 0 | 0 |
| 237284 | 1 | 0 | 0 | 0 | 0 |
| 238239 | 1 | 0 | 0 | 0 | 0 |
| 238240 | 2 | 0 | 0 | 0 | 0 |
| 240241 | 1 | 0 | 0 | 0 | 0 |
| 240242 | 1 | 0 | 0 | 0 | 0 |
| 242243 | 1 | 0 | 0 | 0 | 0 |
| 242244 | 2 | 0 | 0 | 0 | 0 |
| 244245 | 1 | 0 | 0 | 0 | 0 |
| 244246 | 1 | 0 | 0 | 0 | 0 |
| 246247 | 1 | 0 | 0 | 0 | 0 |
| 248249 | 1 | 0 | 0 | 0 | 0 |
| 248250 | 1 | 0 | 0 | 0 | 0 |
| 248251 | 1 | 0 | 0 | 0 | 0 |
| 251252 | 1 | 0 | 0 | 0 | 0 |
| 251253 | 1 | 0 | 0 | 0 | 0 |
| 251254 | 1 | 0 | 0 | 0 | 0 |
| 254255 | 1 | 0 | 0 | 0 | 0 |
| 254271 | 2 | 0 | 0 | 0 | 0 |
| 255256 | 1 | 0 | 0 | 0 | 0 |
| 256257 | 1 | 0 | 0 | 0 | 0 |
| 256258 | 1 | 0 | 0 | 0 | 0 |
| 256259 | 1 | 0 | 0 | 0 | 0 |
| 259260 | 1 | 0 | 0 | 0 | 0 |
| 259273 | 1 | 0 | 0 | 0 | 0 |
| 259276 | 1 | 0 | 0 | 0 | 0 |
| 260261 | 1 | 0 | 0 | 0 | 0 |
| 260262 | 1 | 0 | 0 | 0 | 0 |
| 260263 | 1 | 0 | 0 | 0 | 0 |
| 263264 | 1 | 0 | 0 | 0 | 0 |
| 264265 | 1 | 0 | 0 | 0 | 0 |
| 264272 | 2 | 0 | 0 | 0 | 0 |
| 265266 | 1 | 0 | 0 | 0 | 0 |
| 265267 | 1 | 0 | 0 | 0 | 0 |
| 265268 | 1 | 0 | 0 | 0 | 0 |
| 268269 | 1 | 0 | 0 | 0 | 0 |
| 268270 | 1 | 0 | 0 | 0 | 0 |
| 268289 | 1 | 0 | 0 | 0 | 0 |
| 273274 | 1 | 0 | 0 | 0 | 0 |
| 273275 | 1 | 0 | 0 | 0 | 0 |
| 273279 | 1 | 0 | 0 | 0 | 0 |
| 276277 | 1 | 0 | 0 | 0 | 0 |
| 276278 | 1 | 0 | 0 | 0 | 0 |
| 276283 | 1 | 0 | 0 | 0 | 0 |
| 279280 | 1 | 0 | 0 | 0 | 0 |
| 279281 | 1 | 0 | 0 | 0 | 0 |
| 279282 | 1 | 0 | 0 | 0 | 0 |
| 283284 | 1 | 0 | 0 | 0 | 0 |
| 284285 | 2 | 0 | 0 | 0 | 0 |
| 286287 | 1 | 0 | 0 | 0 | 0 |
| 286288 | 1 | 0 | 0 | 0 | 0 |
| 286289 | 1 | 0 | 0 | 0 | 0 |
| 286300 | 1 | 0 | 0 | 0 | 0 |
| 289290 | 1 | 0 | 0 | 0 | 0 |
| 290291 | 1 | 0 | 0 | 0 | 0 |
| 290292 | 1 | 0 | 0 | 0 | 0 |
| 290293 | 1 | 0 | 0 | 0 | 0 |
| 293294 | 1 | 0 | 0 | 0 | 0 |
| 293295 | 1 | 0 | 0 | 0 | 0 |
| 293296 | 1 | 0 | 0 | 0 | 0 |
| 296297 | 1 | 0 | 0 | 0 | 0 |
| 296319 | 1 | 0 | 0 | 0 | 0 |
| 297298 | 1 | 0 | 0 | 0 | 0 |
| 297299 | 1 | 0 | 0 | 0 | 0 |
| 297304 | 1 | 0 | 0 | 0 | 0 |
| 300301 | 1 | 0 | 0 | 0 | 0 |
| 300302 | 1 | 0 | 0 | 0 | 0 |
| 300303 | 1 | 0 | 0 | 0 | 0 |
| 304305 | 1 | 0 | 0 | 0 | 0 |
| 304306 | 1 | 0 | 0 | 0 | 0 |
| 304307 | 1 | 0 | 0 | 0 | 0 |
| 308309 | 1 | 0 | 0 | 0 | 0 |
| 308317 | 2 | 0 | 0 | 0 | 0 |
| 308356 | 1 | 0 | 0 | 0 | 0 |
| 309310 | 1 | 0 | 0 | 0 | 0 |
| 309311 | 2 | 0 | 0 | 0 | 0 |
| 311312 | 1 | 0 | 0 | 0 | 0 |
| 311313 | 1 | 0 | 0 | 0 | 0 |
| 313314 | 1 | 0 | 0 | 0 | 0 |
| 313315 | 2 | 0 | 0 | 0 | 0 |
| 315316 | 1 | 0 | 0 | 0 | 0 |

315317 1 0 0 0 0  
317318 1 0 0 0 0  
319320 1 0 0 0 0  
319321 1 0 0 0 0  
319322 1 0 0 0 0  
322323 1 0 0 0 0  
322324 1 0 0 0 0  
322325 1 0 0 0 0  
325326 1 0 0 0 0  
325343 2 0 0 0 0  
326327 1 0 0 0 0  
327328 1 0 0 0 0  
327329 1 0 0 0 0  
327330 1 0 0 0 0  
330331 1 0 0 0 0  
330345 1 0 0 0 0  
330348 1 0 0 0 0  
331332 1 0 0 0 0  
331333 1 0 0 0 0  
331334 1 0 0 0 0  
334335 1 0 0 0 0  
335336 1 0 0 0 0  
335344 2 0 0 0 0  
336337 1 0 0 0 0  
336338 1 0 0 0 0  
336339 1 0 0 0 0  
339340 1 0 0 0 0  
339341 1 0 0 0 0  
339342 1 0 0 0 0  
345346 1 0 0 0 0  
345347 1 0 0 0 0  
345351 1 0 0 0 0  
348349 1 0 0 0 0  
348350 1 0 0 0 0  
348355 1 0 0 0 0  
351352 1 0 0 0 0  
351353 1 0 0 0 0  
351354 1 0 0 0 0  
355356 1 0 0 0 0  
356357 2 0 0 0 0

M END  
> <NAME>  
AA61\_1

\$\$\$\$

B17\_1  
MOE2012 3D

282286 0 0 1 0 0 0 0 0999 V2000  
19.0650 3.2480 -5.4040 C 0 0 0 0 0 0 0 0 0 0 0 0 0 0 0  
19.6100 4.1490 -6.3340 C 0 0 0 0 0 0 0 0 0 0 0 0 0 0 0  
19.0500 4.2130 -7.6170 C 0 0 0 0 0 0 0 0 0 0 0 0 0 0 0  
19.4290 4.9070 -8.3610 H 0 0 0 0 0 0 0 0 0 0 0 0 0 0 0  
17.9540 3.4080 -7.9670 C 0 0 0 0 0 0 0 0 0 0 0 0 0 0 0  
17.4140 2.5310 -7.0210 C 0 0 0 0 0 0 0 0 0 0 0 0 0 0 0  
16.5500 1.9170 -7.2640 H 0 0 0 0 0 0 0 0 0 0 0 0 0 0 0  
17.9650 2.4570 -5.7470 C 0 0 0 0 0 0 0 0 0 0 0 0 0 0 0  
17.5350 1.7830 -5.0110 H 0 0 0 0 0 0 0 0 0 0 0 0 0 0 0  
19.4770 3.0990 -4.1040 O 0 0 0 0 0 0 0 0 0 0 0 0 0 0 0  
20.6340 4.9510 -5.9060 O 0 0 0 0 0 0 0 0 0 0 0 0 0 0 0  
21.2900 5.7660 -6.8690 C 0 0 0 0 0 0 0 0 0 0 0 0 0 0 0  
22.1270 6.2630 -6.3700 H 0 0 0 0 0 0 0 0 0 0 0 0 0 0 0  
20.6180 6.5440 -7.2460 H 0 0 0 0 0 0 0 0 0 0 0 0 0 0 0  
21.7000 5.1640 -7.6870 H 0 0 0 0 0 0 0 0 0 0 0 0 0 0 0  
20.8870 2.9850 -3.9400 C 0 0 0 0 0 0 0 0 0 0 0 0 0 0 0  
21.3260 3.9670 -3.7390 H 0 0 0 0 0 0 0 0 0 0 0 0 0 0 0  
21.3770 2.5030 -4.7940 H 0 0 0 0 0 0 0 0 0 0 0 0 0 0 0  
21.0680 2.3600 -3.0600 H 0 0 0 0 0 0 0 0 0 0 0 0 0 0 0  
17.2990 3.5490 -9.3190 C 0 0 0 0 0 0 0 0 0 0 0 0 0 0 0  
18.0640 3.7100 -10.0900 H 0 0 0 0 0 0 0 0 0 0 0 0 0 0 0  
16.8000 2.6060 -9.5780 H 0 0 0 0 0 0 0 0 0 0 0 0 0 0 0  
16.2930 4.7060 -9.3080 C 0 0 0 0 0 0 0 0 0 0 0 0 0 0 0  
15.6610 4.6140 -8.4180 H 0 0 0 0 0 0 0 0 0 0 0 0 0 0 0  
16.8260 5.6620 -9.2330 H 0 0 0 0 0 0 0 0 0 0 0 0 0 0 0  
15.4760 4.6750 -10.5200 N 0 0 3 0 0 0 0 0 0 0 0 0 0 0 0  
16.0790 4.7440 -11.3410 H 0 0 0 0 0 0 0 0 0 0 0 0 0 0 0  
14.4750 5.7440 -10.5730 C 0 0 0 0 0 0 0 0 0 0 0 0 0 0 0  
13.9730 5.6700 -11.5460 H 0 0 0 0 0 0 0 0 0 0 0 0 0 0 0  
14.9710 6.7220 -10.5550 H 0 0 0 0 0 0 0 0 0 0 0 0 0 0 0  
13.4130 5.6890 -9.4780 C 0 0 0 0 0 0 0 0 0 0 0 0 0 0 0  
13.8330 5.9090 -8.4910 H 0 0 0 0 0 0 0 0 0 0 0 0 0 0 0







|         |        |         |   |   |   |   |   |   |   |   |   |   |   |   |   |
|---------|--------|---------|---|---|---|---|---|---|---|---|---|---|---|---|---|
| 11.9380 | 3.5560 | 18.9180 | H | 0 | 0 | 0 | 0 | 0 | 0 | 0 | 0 | 0 | 0 | 0 | 0 |
| 19.7480 | 9.7120 | 16.5280 | O | 0 | 0 | 0 | 0 | 0 | 0 | 0 | 0 | 0 | 0 | 0 | 0 |
| 13.3710 | 5.8600 | 18.2640 | O | 0 | 0 | 0 | 0 | 0 | 0 | 0 | 0 | 0 | 0 | 0 | 0 |
| 17.6350 | 7.5790 | 15.3950 | C | 0 | 0 | 0 | 0 | 0 | 0 | 0 | 0 | 0 | 0 | 0 | 0 |
| 16.5560 | 7.7180 | 15.2750 | H | 0 | 0 | 0 | 0 | 0 | 0 | 0 | 0 | 0 | 0 | 0 | 0 |
| 17.9230 | 6.6380 | 14.9140 | H | 0 | 0 | 0 | 0 | 0 | 0 | 0 | 0 | 0 | 0 | 0 | 0 |
| 18.1370 | 8.3790 | 14.8420 | H | 0 | 0 | 0 | 0 | 0 | 0 | 0 | 0 | 0 | 0 | 0 | 0 |
| 1       | 2      | 1       | 0 | 0 | 0 | 0 | 0 | 0 | 0 | 0 | 0 | 0 | 0 | 0 | 0 |
| 1       | 8      | 2       | 0 | 0 | 0 | 0 | 0 | 0 | 0 | 0 | 0 | 0 | 0 | 0 | 0 |
| 1       | 10     | 1       | 0 | 0 | 0 | 0 | 0 | 0 | 0 | 0 | 0 | 0 | 0 | 0 | 0 |
| 2       | 3      | 2       | 0 | 0 | 0 | 0 | 0 | 0 | 0 | 0 | 0 | 0 | 0 | 0 | 0 |
| 2       | 11     | 1       | 0 | 0 | 0 | 0 | 0 | 0 | 0 | 0 | 0 | 0 | 0 | 0 | 0 |
| 3       | 4      | 1       | 0 | 0 | 0 | 0 | 0 | 0 | 0 | 0 | 0 | 0 | 0 | 0 | 0 |
| 3       | 5      | 1       | 0 | 0 | 0 | 0 | 0 | 0 | 0 | 0 | 0 | 0 | 0 | 0 | 0 |
| 5       | 6      | 2       | 0 | 0 | 0 | 0 | 0 | 0 | 0 | 0 | 0 | 0 | 0 | 0 | 0 |
| 5       | 20     | 1       | 0 | 0 | 0 | 0 | 0 | 0 | 0 | 0 | 0 | 0 | 0 | 0 | 0 |
| 6       | 7      | 1       | 0 | 0 | 0 | 0 | 0 | 0 | 0 | 0 | 0 | 0 | 0 | 0 | 0 |
| 6       | 8      | 1       | 0 | 0 | 0 | 0 | 0 | 0 | 0 | 0 | 0 | 0 | 0 | 0 | 0 |
| 8       | 9      | 1       | 0 | 0 | 0 | 0 | 0 | 0 | 0 | 0 | 0 | 0 | 0 | 0 | 0 |
| 10      | 16     | 1       | 0 | 0 | 0 | 0 | 0 | 0 | 0 | 0 | 0 | 0 | 0 | 0 | 0 |
| 11      | 12     | 1       | 0 | 0 | 0 | 0 | 0 | 0 | 0 | 0 | 0 | 0 | 0 | 0 | 0 |
| 12      | 13     | 1       | 0 | 0 | 0 | 0 | 0 | 0 | 0 | 0 | 0 | 0 | 0 | 0 | 0 |
| 12      | 14     | 1       | 0 | 0 | 0 | 0 | 0 | 0 | 0 | 0 | 0 | 0 | 0 | 0 | 0 |
| 12      | 15     | 1       | 0 | 0 | 0 | 0 | 0 | 0 | 0 | 0 | 0 | 0 | 0 | 0 | 0 |
| 16      | 17     | 1       | 0 | 0 | 0 | 0 | 0 | 0 | 0 | 0 | 0 | 0 | 0 | 0 | 0 |
| 16      | 18     | 1       | 0 | 0 | 0 | 0 | 0 | 0 | 0 | 0 | 0 | 0 | 0 | 0 | 0 |
| 16      | 19     | 1       | 0 | 0 | 0 | 0 | 0 | 0 | 0 | 0 | 0 | 0 | 0 | 0 | 0 |
| 20      | 21     | 1       | 0 | 0 | 0 | 0 | 0 | 0 | 0 | 0 | 0 | 0 | 0 | 0 | 0 |
| 20      | 22     | 1       | 0 | 0 | 0 | 0 | 0 | 0 | 0 | 0 | 0 | 0 | 0 | 0 | 0 |
| 20      | 23     | 1       | 0 | 0 | 0 | 0 | 0 | 0 | 0 | 0 | 0 | 0 | 0 | 0 | 0 |
| 23      | 24     | 1       | 0 | 0 | 0 | 0 | 0 | 0 | 0 | 0 | 0 | 0 | 0 | 0 | 0 |
| 23      | 25     | 1       | 0 | 0 | 0 | 0 | 0 | 0 | 0 | 0 | 0 | 0 | 0 | 0 | 0 |
| 23      | 26     | 1       | 0 | 0 | 0 | 0 | 0 | 0 | 0 | 0 | 0 | 0 | 0 | 0 | 0 |
| 26      | 27     | 1       | 0 | 0 | 0 | 0 | 0 | 0 | 0 | 0 | 0 | 0 | 0 | 0 | 0 |
| 26      | 28     | 1       | 0 | 0 | 0 | 0 | 0 | 0 | 0 | 0 | 0 | 0 | 0 | 0 | 0 |
| 28      | 29     | 1       | 0 | 0 | 0 | 0 | 0 | 0 | 0 | 0 | 0 | 0 | 0 | 0 | 0 |
| 28      | 30     | 1       | 0 | 0 | 0 | 0 | 0 | 0 | 0 | 0 | 0 | 0 | 0 | 0 | 0 |
| 28      | 31     | 1       | 0 | 0 | 0 | 0 | 0 | 0 | 0 | 0 | 0 | 0 | 0 | 0 | 0 |
| 31      | 32     | 1       | 0 | 0 | 0 | 0 | 0 | 0 | 0 | 0 | 0 | 0 | 0 | 0 | 0 |
| 31      | 33     | 1       | 0 | 0 | 0 | 0 | 0 | 0 | 0 | 0 | 0 | 0 | 0 | 0 | 0 |
| 31      | 34     | 1       | 0 | 0 | 0 | 0 | 0 | 0 | 0 | 0 | 0 | 0 | 0 | 0 | 0 |
| 34      | 35     | 1       | 0 | 0 | 0 | 0 | 0 | 0 | 0 | 0 | 0 | 0 | 0 | 0 | 0 |
| 34      | 52     | 2       | 0 | 0 | 0 | 0 | 0 | 0 | 0 | 0 | 0 | 0 | 0 | 0 | 0 |
| 35      | 36     | 1       | 0 | 0 | 0 | 0 | 0 | 0 | 0 | 0 | 0 | 0 | 0 | 0 | 0 |
| 36      | 37     | 1       | 0 | 0 | 0 | 0 | 0 | 0 | 0 | 0 | 0 | 0 | 0 | 0 | 0 |
| 36      | 38     | 1       | 0 | 0 | 0 | 0 | 0 | 0 | 0 | 0 | 0 | 0 | 0 | 0 | 0 |
| 36      | 54     | 1       | 0 | 0 | 0 | 0 | 0 | 0 | 0 | 0 | 0 | 0 | 0 | 0 | 0 |
| 38      | 39     | 1       | 0 | 0 | 0 | 0 | 0 | 0 | 0 | 0 | 0 | 0 | 0 | 0 | 0 |
| 38      | 40     | 1       | 0 | 0 | 0 | 0 | 0 | 0 | 0 | 0 | 0 | 0 | 0 | 0 | 0 |
| 38      | 41     | 1       | 0 | 0 | 0 | 0 | 0 | 0 | 0 | 0 | 0 | 0 | 0 | 0 | 0 |
| 41      | 42     | 1       | 0 | 0 | 0 | 0 | 0 | 0 | 0 | 0 | 0 | 0 | 0 | 0 | 0 |
| 41      | 43     | 1       | 0 | 0 | 0 | 0 | 0 | 0 | 0 | 0 | 0 | 0 | 0 | 0 | 0 |
| 41      | 44     | 1       | 0 | 0 | 0 | 0 | 0 | 0 | 0 | 0 | 0 | 0 | 0 | 0 | 0 |
| 44      | 45     | 1       | 0 | 0 | 0 | 0 | 0 | 0 | 0 | 0 | 0 | 0 | 0 | 0 | 0 |
| 45      | 46     | 1       | 0 | 0 | 0 | 0 | 0 | 0 | 0 | 0 | 0 | 0 | 0 | 0 | 0 |
| 45      | 53     | 2       | 0 | 0 | 0 | 0 | 0 | 0 | 0 | 0 | 0 | 0 | 0 | 0 | 0 |
| 46      | 47     | 1       | 0 | 0 | 0 | 0 | 0 | 0 | 0 | 0 | 0 | 0 | 0 | 0 | 0 |
| 46      | 48     | 1       | 0 | 0 | 0 | 0 | 0 | 0 | 0 | 0 | 0 | 0 | 0 | 0 | 0 |
| 46      | 49     | 1       | 0 | 0 | 0 | 0 | 0 | 0 | 0 | 0 | 0 | 0 | 0 | 0 | 0 |
| 49      | 50     | 1       | 0 | 0 | 0 | 0 | 0 | 0 | 0 | 0 | 0 | 0 | 0 | 0 | 0 |
| 49      | 51     | 1       | 0 | 0 | 0 | 0 | 0 | 0 | 0 | 0 | 0 | 0 | 0 | 0 | 0 |
| 49      | 83     | 1       | 0 | 0 | 0 | 0 | 0 | 0 | 0 | 0 | 0 | 0 | 0 | 0 | 0 |
| 54      | 55     | 1       | 0 | 0 | 0 | 0 | 0 | 0 | 0 | 0 | 0 | 0 | 0 | 0 | 0 |
| 54      | 56     | 1       | 0 | 0 | 0 | 0 | 0 | 0 | 0 | 0 | 0 | 0 | 0 | 0 | 0 |
| 54      | 57     | 1       | 0 | 0 | 0 | 0 | 0 | 0 | 0 | 0 | 0 | 0 | 0 | 0 | 0 |
| 58      | 59     | 1       | 0 | 0 | 0 | 0 | 0 | 0 | 0 | 0 | 0 | 0 | 0 | 0 | 0 |
| 58      | 65     | 2       | 0 | 0 | 0 | 0 | 0 | 0 | 0 | 0 | 0 | 0 | 0 | 0 | 0 |
| 58      | 67     | 1       | 0 | 0 | 0 | 0 | 0 | 0 | 0 | 0 | 0 | 0 | 0 | 0 | 0 |
| 59      | 60     | 2       | 0 | 0 | 0 | 0 | 0 | 0 | 0 | 0 | 0 | 0 | 0 | 0 | 0 |
| 59      | 68     | 1       | 0 | 0 | 0 | 0 | 0 | 0 | 0 | 0 | 0 | 0 | 0 | 0 | 0 |
| 60      | 61     | 1       | 0 | 0 | 0 | 0 | 0 | 0 | 0 | 0 | 0 | 0 | 0 | 0 | 0 |
| 60      | 62     | 1       | 0 | 0 | 0 | 0 | 0 | 0 | 0 | 0 | 0 | 0 | 0 | 0 | 0 |
| 62      | 63     | 2       | 0 | 0 | 0 | 0 | 0 | 0 | 0 | 0 | 0 | 0 | 0 | 0 | 0 |
| 62      | 77     | 1       | 0 | 0 | 0 | 0 | 0 | 0 | 0 | 0 | 0 | 0 | 0 | 0 | 0 |
| 63      | 64     | 1       | 0 | 0 | 0 | 0 | 0 | 0 | 0 | 0 | 0 | 0 | 0 | 0 | 0 |
| 63      | 65     | 1       | 0 | 0 | 0 | 0 | 0 | 0 | 0 | 0 | 0 | 0 | 0 | 0 | 0 |
| 65      | 66     | 1       | 0 | 0 | 0 | 0 | 0 | 0 | 0 | 0 | 0 | 0 | 0 | 0 | 0 |
| 67      | 73     | 1       | 0 | 0 | 0 | 0 | 0 | 0 | 0 | 0 | 0 | 0 | 0 | 0 | 0 |
| 68      | 69     | 1       | 0 | 0 | 0 | 0 | 0 | 0 | 0 | 0 | 0 | 0 | 0 | 0 | 0 |
| 69      | 70     | 1       | 0 | 0 | 0 | 0 | 0 | 0 | 0 | 0 | 0 | 0 | 0 | 0 | 0 |
| 69      | 71     | 1       | 0 | 0 | 0 | 0 | 0 | 0 | 0 | 0 | 0 | 0 | 0 | 0 | 0 |

|     |     |   |   |   |   |   |
|-----|-----|---|---|---|---|---|
| 69  | 72  | 1 | 0 | 0 | 0 | 0 |
| 73  | 74  | 1 | 0 | 0 | 0 | 0 |
| 73  | 75  | 1 | 0 | 0 | 0 | 0 |
| 73  | 76  | 1 | 0 | 0 | 0 | 0 |
| 77  | 78  | 1 | 0 | 0 | 0 | 0 |
| 77  | 79  | 1 | 0 | 0 | 0 | 0 |
| 77  | 80  | 1 | 0 | 0 | 0 | 0 |
| 80  | 81  | 1 | 0 | 0 | 0 | 0 |
| 80  | 82  | 1 | 0 | 0 | 0 | 0 |
| 80  | 83  | 1 | 0 | 0 | 0 | 0 |
| 83  | 84  | 1 | 0 | 0 | 0 | 0 |
| 84  | 85  | 1 | 0 | 0 | 0 | 0 |
| 84  | 86  | 1 | 0 | 0 | 0 | 0 |
| 84  | 87  | 1 | 0 | 0 | 0 | 0 |
| 87  | 88  | 1 | 0 | 0 | 0 | 0 |
| 87  | 89  | 1 | 0 | 0 | 0 | 0 |
| 87  | 90  | 1 | 0 | 0 | 0 | 0 |
| 90  | 91  | 1 | 0 | 0 | 0 | 0 |
| 90  | 108 | 2 | 0 | 0 | 0 | 0 |
| 91  | 92  | 1 | 0 | 0 | 0 | 0 |
| 92  | 93  | 1 | 0 | 0 | 0 | 0 |
| 92  | 94  | 1 | 0 | 0 | 0 | 0 |
| 92  | 110 | 1 | 0 | 0 | 0 | 0 |
| 94  | 95  | 1 | 0 | 0 | 0 | 0 |
| 94  | 96  | 1 | 0 | 0 | 0 | 0 |
| 94  | 97  | 1 | 0 | 0 | 0 | 0 |
| 97  | 98  | 1 | 0 | 0 | 0 | 0 |
| 97  | 99  | 1 | 0 | 0 | 0 | 0 |
| 97  | 100 | 1 | 0 | 0 | 0 | 0 |
| 100 | 101 | 1 | 0 | 0 | 0 | 0 |
| 101 | 102 | 1 | 0 | 0 | 0 | 0 |
| 101 | 109 | 2 | 0 | 0 | 0 | 0 |
| 102 | 103 | 1 | 0 | 0 | 0 | 0 |
| 102 | 104 | 1 | 0 | 0 | 0 | 0 |
| 102 | 105 | 1 | 0 | 0 | 0 | 0 |
| 105 | 106 | 1 | 0 | 0 | 0 | 0 |
| 105 | 107 | 1 | 0 | 0 | 0 | 0 |
| 105 | 139 | 1 | 0 | 0 | 0 | 0 |
| 110 | 111 | 1 | 0 | 0 | 0 | 0 |
| 110 | 112 | 1 | 0 | 0 | 0 | 0 |
| 110 | 113 | 1 | 0 | 0 | 0 | 0 |
| 114 | 115 | 1 | 0 | 0 | 0 | 0 |
| 114 | 121 | 2 | 0 | 0 | 0 | 0 |
| 114 | 123 | 1 | 0 | 0 | 0 | 0 |
| 115 | 116 | 2 | 0 | 0 | 0 | 0 |
| 115 | 124 | 1 | 0 | 0 | 0 | 0 |
| 116 | 117 | 1 | 0 | 0 | 0 | 0 |
| 116 | 118 | 1 | 0 | 0 | 0 | 0 |
| 118 | 119 | 2 | 0 | 0 | 0 | 0 |
| 118 | 133 | 1 | 0 | 0 | 0 | 0 |
| 119 | 120 | 1 | 0 | 0 | 0 | 0 |
| 119 | 121 | 1 | 0 | 0 | 0 | 0 |
| 121 | 122 | 1 | 0 | 0 | 0 | 0 |
| 123 | 129 | 1 | 0 | 0 | 0 | 0 |
| 124 | 125 | 1 | 0 | 0 | 0 | 0 |
| 125 | 126 | 1 | 0 | 0 | 0 | 0 |
| 125 | 127 | 1 | 0 | 0 | 0 | 0 |
| 125 | 128 | 1 | 0 | 0 | 0 | 0 |
| 129 | 130 | 1 | 0 | 0 | 0 | 0 |
| 129 | 131 | 1 | 0 | 0 | 0 | 0 |
| 129 | 132 | 1 | 0 | 0 | 0 | 0 |
| 133 | 134 | 1 | 0 | 0 | 0 | 0 |
| 133 | 135 | 1 | 0 | 0 | 0 | 0 |
| 133 | 136 | 1 | 0 | 0 | 0 | 0 |
| 136 | 137 | 1 | 0 | 0 | 0 | 0 |
| 136 | 138 | 1 | 0 | 0 | 0 | 0 |
| 136 | 139 | 1 | 0 | 0 | 0 | 0 |
| 139 | 140 | 1 | 0 | 0 | 0 | 0 |
| 140 | 141 | 1 | 0 | 0 | 0 | 0 |
| 140 | 142 | 1 | 0 | 0 | 0 | 0 |
| 140 | 143 | 1 | 0 | 0 | 0 | 0 |
| 143 | 144 | 1 | 0 | 0 | 0 | 0 |
| 143 | 145 | 1 | 0 | 0 | 0 | 0 |
| 143 | 146 | 1 | 0 | 0 | 0 | 0 |
| 146 | 147 | 1 | 0 | 0 | 0 | 0 |
| 146 | 164 | 2 | 0 | 0 | 0 | 0 |
| 147 | 148 | 1 | 0 | 0 | 0 | 0 |
| 148 | 149 | 1 | 0 | 0 | 0 | 0 |
| 148 | 150 | 1 | 0 | 0 | 0 | 0 |
| 148 | 166 | 1 | 0 | 0 | 0 | 0 |
| 150 | 151 | 1 | 0 | 0 | 0 | 0 |

|        |   |   |   |   |   |
|--------|---|---|---|---|---|
| 150152 | 1 | 0 | 0 | 0 | 0 |
| 150153 | 1 | 0 | 0 | 0 | 0 |
| 153154 | 1 | 0 | 0 | 0 | 0 |
| 153155 | 1 | 0 | 0 | 0 | 0 |
| 153156 | 1 | 0 | 0 | 0 | 0 |
| 156157 | 1 | 0 | 0 | 0 | 0 |
| 157158 | 1 | 0 | 0 | 0 | 0 |
| 157165 | 2 | 0 | 0 | 0 | 0 |
| 158159 | 1 | 0 | 0 | 0 | 0 |
| 158160 | 1 | 0 | 0 | 0 | 0 |
| 158161 | 1 | 0 | 0 | 0 | 0 |
| 161162 | 1 | 0 | 0 | 0 | 0 |
| 161163 | 1 | 0 | 0 | 0 | 0 |
| 161195 | 1 | 0 | 0 | 0 | 0 |
| 166167 | 1 | 0 | 0 | 0 | 0 |
| 166168 | 1 | 0 | 0 | 0 | 0 |
| 166169 | 1 | 0 | 0 | 0 | 0 |
| 170171 | 1 | 0 | 0 | 0 | 0 |
| 170177 | 2 | 0 | 0 | 0 | 0 |
| 170179 | 1 | 0 | 0 | 0 | 0 |
| 171172 | 2 | 0 | 0 | 0 | 0 |
| 171180 | 1 | 0 | 0 | 0 | 0 |
| 172173 | 1 | 0 | 0 | 0 | 0 |
| 172174 | 1 | 0 | 0 | 0 | 0 |
| 174175 | 2 | 0 | 0 | 0 | 0 |
| 174189 | 1 | 0 | 0 | 0 | 0 |
| 175176 | 1 | 0 | 0 | 0 | 0 |
| 175177 | 1 | 0 | 0 | 0 | 0 |
| 177178 | 1 | 0 | 0 | 0 | 0 |
| 179185 | 1 | 0 | 0 | 0 | 0 |
| 180181 | 1 | 0 | 0 | 0 | 0 |
| 181182 | 1 | 0 | 0 | 0 | 0 |
| 181183 | 1 | 0 | 0 | 0 | 0 |
| 181184 | 1 | 0 | 0 | 0 | 0 |
| 185186 | 1 | 0 | 0 | 0 | 0 |
| 185187 | 1 | 0 | 0 | 0 | 0 |
| 185188 | 1 | 0 | 0 | 0 | 0 |
| 189190 | 1 | 0 | 0 | 0 | 0 |
| 189191 | 1 | 0 | 0 | 0 | 0 |
| 189192 | 1 | 0 | 0 | 0 | 0 |
| 192193 | 1 | 0 | 0 | 0 | 0 |
| 192194 | 1 | 0 | 0 | 0 | 0 |
| 192195 | 1 | 0 | 0 | 0 | 0 |
| 195196 | 1 | 0 | 0 | 0 | 0 |
| 196197 | 1 | 0 | 0 | 0 | 0 |
| 196198 | 1 | 0 | 0 | 0 | 0 |
| 196199 | 1 | 0 | 0 | 0 | 0 |
| 199200 | 1 | 0 | 0 | 0 | 0 |
| 199201 | 1 | 0 | 0 | 0 | 0 |
| 199202 | 1 | 0 | 0 | 0 | 0 |
| 202203 | 1 | 0 | 0 | 0 | 0 |
| 202220 | 2 | 0 | 0 | 0 | 0 |
| 203204 | 1 | 0 | 0 | 0 | 0 |
| 204205 | 1 | 0 | 0 | 0 | 0 |
| 204206 | 1 | 0 | 0 | 0 | 0 |
| 204222 | 1 | 0 | 0 | 0 | 0 |
| 206207 | 1 | 0 | 0 | 0 | 0 |
| 206208 | 1 | 0 | 0 | 0 | 0 |
| 206209 | 1 | 0 | 0 | 0 | 0 |
| 209210 | 1 | 0 | 0 | 0 | 0 |
| 209211 | 1 | 0 | 0 | 0 | 0 |
| 209212 | 1 | 0 | 0 | 0 | 0 |
| 212213 | 1 | 0 | 0 | 0 | 0 |
| 213214 | 1 | 0 | 0 | 0 | 0 |
| 213221 | 2 | 0 | 0 | 0 | 0 |
| 214215 | 1 | 0 | 0 | 0 | 0 |
| 214216 | 1 | 0 | 0 | 0 | 0 |
| 214217 | 1 | 0 | 0 | 0 | 0 |
| 217218 | 1 | 0 | 0 | 0 | 0 |
| 217219 | 1 | 0 | 0 | 0 | 0 |
| 217251 | 1 | 0 | 0 | 0 | 0 |
| 222223 | 1 | 0 | 0 | 0 | 0 |
| 222224 | 1 | 0 | 0 | 0 | 0 |
| 222225 | 1 | 0 | 0 | 0 | 0 |
| 226227 | 1 | 0 | 0 | 0 | 0 |
| 226233 | 2 | 0 | 0 | 0 | 0 |
| 226235 | 1 | 0 | 0 | 0 | 0 |
| 227228 | 2 | 0 | 0 | 0 | 0 |
| 227236 | 1 | 0 | 0 | 0 | 0 |
| 228229 | 1 | 0 | 0 | 0 | 0 |
| 228230 | 1 | 0 | 0 | 0 | 0 |



```

230231 2 0 0 0 0
230245 1 0 0 0 0
231232 1 0 0 0 0
231233 1 0 0 0 0
233234 1 0 0 0 0
235241 1 0 0 0 0
236237 1 0 0 0 0
237238 1 0 0 0 0
237239 1 0 0 0 0
237240 1 0 0 0 0
241242 1 0 0 0 0
241243 1 0 0 0 0
241244 1 0 0 0 0
245246 1 0 0 0 0
245247 1 0 0 0 0
245248 1 0 0 0 0
248249 1 0 0 0 0
248250 1 0 0 0 0
248251 1 0 0 0 0
251252 1 0 0 0 0
252253 1 0 0 0 0
252254 1 0 0 0 0
252255 1 0 0 0 0
255256 1 0 0 0 0
255257 1 0 0 0 0
255258 1 0 0 0 0
258259 1 0 0 0 0
258277 2 0 0 0 0
259260 1 0 0 0 0
260261 1 0 0 0 0
260262 1 0 0 0 0
260279 1 0 0 0 0
262263 1 0 0 0 0
262264 1 0 0 0 0
262265 1 0 0 0 0
265266 1 0 0 0 0
265267 1 0 0 0 0
265268 1 0 0 0 0
268269 1 0 0 0 0
269270 1 0 0 0 0
269278 2 0 0 0 0
270271 1 0 0 0 0
270272 1 0 0 0 0
270273 1 0 0 0 0
273274 1 0 0 0 0
273275 1 0 0 0 0
273276 1 0 0 0 0
279280 1 0 0 0 0
279281 1 0 0 0 0
279282 1 0 0 0 0

```

```

M END
> <NAME>
B17_1

```

```

$$$$
C20_1
MOE2012 3D

```

```

212211 0 0 1 0 0 0 0 0999 V2000
3.3690 -3.3600 13.0030 O 0 0 0 0 0 0 0 0 0 0 0 0 0 0 0 0
2.8350 -4.1610 12.8640 H 0 0 0 0 0 0 0 0 0 0 0 0 0 0 0 0
4.6870 -3.6510 12.5570 C 0 0 0 0 0 0 0 0 0 0 0 0 0 0 0 0
5.0730 -4.4930 13.1400 H 0 0 0 0 0 0 0 0 0 0 0 0 0 0 0 0
4.6410 -3.9400 11.5020 H 0 0 0 0 0 0 0 0 0 0 0 0 0 0 0 0
5.5570 -2.4160 12.7440 C 0 0 0 0 0 0 0 0 0 0 0 0 0 0 0 0
5.1220 -1.5790 12.1810 H 0 0 0 0 0 0 0 0 0 0 0 0 0 0 0 0
5.5320 -2.1130 13.7990 H 0 0 0 0 0 0 0 0 0 0 0 0 0 0 0 0
6.9950 -2.6730 12.2950 C 0 0 0 0 0 0 0 0 0 0 0 0 0 0 0 0
7.4200 -3.4950 12.8830 H 0 0 0 0 0 0 0 0 0 0 0 0 0 0 0 0
6.9990 -2.9710 11.2400 H 0 0 0 0 0 0 0 0 0 0 0 0 0 0 0 0
7.7930 -1.4580 12.4720 N 0 0 3 0 0 0 0 0 0 0 0 0 0 0 0 0
7.7520 -1.1630 13.4480 H 0 0 0 0 0 0 0 0 0 0 0 0 0 0 0 0
16.0900 3.4410 11.6040 C 0 0 0 0 0 0 0 0 0 0 0 0 0 0 0 0
15.9760 3.7560 12.6470 H 0 0 0 0 0 0 0 0 0 0 0 0 0 0 0 0
15.5840 4.1570 10.9460 H 0 0 0 0 0 0 0 0 0 0 0 0 0 0 0 0
17.4830 3.3880 11.2680 O 0 0 0 0 0 0 0 0 0 0 0 0 0 0 0 0
18.1510 4.5660 11.4340 C 0 0 0 0 0 0 0 0 0 0 0 0 0 0 0 0
19.6000 4.3800 11.0500 C 0 0 0 0 0 0 0 0 0 0 0 0 0 0 0 0
19.9870 3.5100 11.5930 H 0 0 0 0 0 0 0 0 0 0 0 0 0 0 0 0
19.6380 4.1780 9.9750 H 0 0 0 0 0 0 0 0 0 0 0 0 0 0 0 0
20.4260 5.6180 11.4140 C 0 0 0 0 0 0 0 0 0 0 0 0 0 0 0 0

```





|         |         |         |   |   |   |   |   |   |   |   |   |   |   |   |   |   |
|---------|---------|---------|---|---|---|---|---|---|---|---|---|---|---|---|---|---|
| 68.3110 | 16.9110 | -7.7280 | O | 0 | 0 | 0 | 0 | 0 | 0 | 0 | 0 | 0 | 0 | 0 | 0 | 0 |
| 69.5380 | 17.4540 | -7.4830 | C | 0 | 0 | 0 | 0 | 0 | 0 | 0 | 0 | 0 | 0 | 0 | 0 | 0 |
| 69.7360 | 18.6590 | -8.3710 | C | 0 | 0 | 0 | 0 | 0 | 0 | 0 | 0 | 0 | 0 | 0 | 0 | 0 |
| 69.6420 | 18.3400 | -9.4140 | H | 0 | 0 | 0 | 0 | 0 | 0 | 0 | 0 | 0 | 0 | 0 | 0 | 0 |
| 68.9510 | 19.3880 | -8.1460 | H | 0 | 0 | 0 | 0 | 0 | 0 | 0 | 0 | 0 | 0 | 0 | 0 | 0 |
| 71.0960 | 19.3020 | -8.1650 | C | 0 | 0 | 0 | 0 | 0 | 0 | 0 | 0 | 0 | 0 | 0 | 0 | 0 |
| 71.2190 | 19.6380 | -7.1300 | H | 0 | 0 | 0 | 0 | 0 | 0 | 0 | 0 | 0 | 0 | 0 | 0 | 0 |
| 71.2120 | 20.1700 | -8.8220 | H | 0 | 0 | 0 | 0 | 0 | 0 | 0 | 0 | 0 | 0 | 0 | 0 | 0 |
| 71.9030 | 18.5960 | -8.3850 | H | 0 | 0 | 0 | 0 | 0 | 0 | 0 | 0 | 0 | 0 | 0 | 0 | 0 |
| 70.3470 | 17.0310 | -6.6690 | O | 0 | 0 | 0 | 0 | 0 | 0 | 0 | 0 | 0 | 0 | 0 | 0 | 0 |
| 61.6790 | 10.0520 | -5.6540 | C | 0 | 0 | 0 | 0 | 0 | 0 | 0 | 0 | 0 | 0 | 0 | 0 | 0 |
| 61.5260 | 9.6850  | -6.6770 | H | 0 | 0 | 0 | 0 | 0 | 0 | 0 | 0 | 0 | 0 | 0 | 0 | 0 |
| 60.9820 | 10.8900 | -5.5140 | H | 0 | 0 | 0 | 0 | 0 | 0 | 0 | 0 | 0 | 0 | 0 | 0 | 0 |
| 63.0960 | 10.6230 | -5.5070 | C | 0 | 0 | 0 | 0 | 0 | 0 | 0 | 0 | 0 | 0 | 0 | 0 | 0 |
| 63.2640 | 10.9310 | -4.4680 | H | 0 | 0 | 0 | 0 | 0 | 0 | 0 | 0 | 0 | 0 | 0 | 0 | 0 |
| 63.8480 | 9.8820  | -5.7940 | H | 0 | 0 | 0 | 0 | 0 | 0 | 0 | 0 | 0 | 0 | 0 | 0 | 0 |
| 63.2940 | 11.8320 | -6.3940 | C | 0 | 0 | 0 | 0 | 0 | 0 | 0 | 0 | 0 | 0 | 0 | 0 | 0 |
| 64.5200 | 12.3810 | -6.1500 | O | 0 | 0 | 0 | 0 | 0 | 0 | 0 | 0 | 0 | 0 | 0 | 0 | 0 |
| 64.8230 | 13.5400 | -6.9390 | C | 0 | 0 | 0 | 0 | 0 | 0 | 0 | 0 | 0 | 0 | 0 | 0 | 0 |
| 64.8050 | 13.2720 | -8.0020 | H | 0 | 0 | 0 | 0 | 0 | 0 | 0 | 0 | 0 | 0 | 0 | 0 | 0 |
| 64.0770 | 14.3200 | -6.7440 | H | 0 | 0 | 0 | 0 | 0 | 0 | 0 | 0 | 0 | 0 | 0 | 0 | 0 |
| 66.2110 | 14.0290 | -6.5430 | C | 0 | 0 | 0 | 0 | 0 | 0 | 0 | 0 | 0 | 0 | 0 | 0 | 0 |
| 66.2260 | 14.2440 | -5.4670 | H | 0 | 0 | 0 | 0 | 0 | 0 | 0 | 0 | 0 | 0 | 0 | 0 | 0 |
| 66.9380 | 13.2210 | -6.6980 | H | 0 | 0 | 0 | 0 | 0 | 0 | 0 | 0 | 0 | 0 | 0 | 0 | 0 |
| 62.4870 | 12.2490 | -7.2130 | O | 0 | 0 | 0 | 0 | 0 | 0 | 0 | 0 | 0 | 0 | 0 | 0 | 0 |
| 66.6190 | 15.2650 | -7.3350 | C | 0 | 0 | 0 | 0 | 0 | 0 | 0 | 0 | 0 | 0 | 0 | 0 | 0 |
| 65.8920 | 16.0730 | -7.1800 | H | 0 | 0 | 0 | 0 | 0 | 0 | 0 | 0 | 0 | 0 | 0 | 0 | 0 |
| 66.6020 | 15.0500 | -8.4110 | H | 0 | 0 | 0 | 0 | 0 | 0 | 0 | 0 | 0 | 0 | 0 | 0 | 0 |

|    |    |   |   |   |   |   |
|----|----|---|---|---|---|---|
| 1  | 2  | 1 | 0 | 0 | 0 | 0 |
| 1  | 3  | 1 | 0 | 0 | 0 | 0 |
| 3  | 4  | 1 | 0 | 0 | 0 | 0 |
| 3  | 5  | 1 | 0 | 0 | 0 | 0 |
| 3  | 6  | 1 | 0 | 0 | 0 | 0 |
| 6  | 7  | 1 | 0 | 0 | 0 | 0 |
| 6  | 8  | 1 | 0 | 0 | 0 | 0 |
| 6  | 9  | 1 | 0 | 0 | 0 | 0 |
| 9  | 10 | 1 | 0 | 0 | 0 | 0 |
| 9  | 11 | 1 | 0 | 0 | 0 | 0 |
| 9  | 12 | 1 | 0 | 0 | 0 | 0 |
| 12 | 13 | 1 | 0 | 0 | 0 | 0 |
| 12 | 26 | 1 | 0 | 0 | 0 | 0 |
| 14 | 15 | 1 | 0 | 0 | 0 | 0 |
| 14 | 16 | 1 | 0 | 0 | 0 | 0 |
| 14 | 17 | 1 | 0 | 0 | 0 | 0 |
| 14 | 41 | 1 | 0 | 0 | 0 | 0 |
| 17 | 18 | 1 | 0 | 0 | 0 | 0 |
| 18 | 19 | 1 | 0 | 0 | 0 | 0 |
| 18 | 25 | 2 | 0 | 0 | 0 | 0 |
| 19 | 20 | 1 | 0 | 0 | 0 | 0 |
| 19 | 21 | 1 | 0 | 0 | 0 | 0 |
| 19 | 22 | 1 | 0 | 0 | 0 | 0 |
| 22 | 23 | 1 | 0 | 0 | 0 | 0 |
| 22 | 24 | 1 | 0 | 0 | 0 | 0 |
| 22 | 55 | 1 | 0 | 0 | 0 | 0 |
| 26 | 27 | 1 | 0 | 0 | 0 | 0 |
| 26 | 28 | 1 | 0 | 0 | 0 | 0 |
| 26 | 29 | 1 | 0 | 0 | 0 | 0 |
| 29 | 30 | 1 | 0 | 0 | 0 | 0 |
| 29 | 31 | 1 | 0 | 0 | 0 | 0 |
| 29 | 32 | 1 | 0 | 0 | 0 | 0 |
| 32 | 33 | 1 | 0 | 0 | 0 | 0 |
| 32 | 40 | 2 | 0 | 0 | 0 | 0 |
| 33 | 34 | 1 | 0 | 0 | 0 | 0 |
| 34 | 35 | 1 | 0 | 0 | 0 | 0 |
| 34 | 36 | 1 | 0 | 0 | 0 | 0 |
| 34 | 37 | 1 | 0 | 0 | 0 | 0 |
| 37 | 38 | 1 | 0 | 0 | 0 | 0 |
| 37 | 39 | 1 | 0 | 0 | 0 | 0 |
| 37 | 41 | 1 | 0 | 0 | 0 | 0 |
| 41 | 42 | 1 | 0 | 0 | 0 | 0 |
| 41 | 43 | 1 | 0 | 0 | 0 | 0 |
| 44 | 45 | 1 | 0 | 0 | 0 | 0 |
| 44 | 46 | 1 | 0 | 0 | 0 | 0 |
| 46 | 47 | 1 | 0 | 0 | 0 | 0 |
| 46 | 48 | 1 | 0 | 0 | 0 | 0 |
| 46 | 49 | 1 | 0 | 0 | 0 | 0 |
| 49 | 50 | 1 | 0 | 0 | 0 | 0 |
| 49 | 51 | 1 | 0 | 0 | 0 | 0 |
| 49 | 52 | 1 | 0 | 0 | 0 | 0 |
| 52 | 53 | 1 | 0 | 0 | 0 | 0 |
| 52 | 54 | 1 | 0 | 0 | 0 | 0 |

|     |     |   |   |   |   |   |
|-----|-----|---|---|---|---|---|
| 52  | 55  | 1 | 0 | 0 | 0 | 0 |
| 55  | 68  | 1 | 0 | 0 | 0 | 0 |
| 56  | 57  | 1 | 0 | 0 | 0 | 0 |
| 56  | 58  | 1 | 0 | 0 | 0 | 0 |
| 56  | 59  | 1 | 0 | 0 | 0 | 0 |
| 56  | 83  | 1 | 0 | 0 | 0 | 0 |
| 59  | 60  | 1 | 0 | 0 | 0 | 0 |
| 60  | 61  | 1 | 0 | 0 | 0 | 0 |
| 60  | 67  | 2 | 0 | 0 | 0 | 0 |
| 61  | 62  | 1 | 0 | 0 | 0 | 0 |
| 61  | 63  | 1 | 0 | 0 | 0 | 0 |
| 61  | 64  | 1 | 0 | 0 | 0 | 0 |
| 64  | 65  | 1 | 0 | 0 | 0 | 0 |
| 64  | 66  | 1 | 0 | 0 | 0 | 0 |
| 64  | 97  | 1 | 0 | 0 | 0 | 0 |
| 68  | 69  | 1 | 0 | 0 | 0 | 0 |
| 68  | 70  | 1 | 0 | 0 | 0 | 0 |
| 68  | 71  | 1 | 0 | 0 | 0 | 0 |
| 71  | 72  | 1 | 0 | 0 | 0 | 0 |
| 71  | 73  | 1 | 0 | 0 | 0 | 0 |
| 71  | 74  | 1 | 0 | 0 | 0 | 0 |
| 74  | 75  | 1 | 0 | 0 | 0 | 0 |
| 74  | 82  | 2 | 0 | 0 | 0 | 0 |
| 75  | 76  | 1 | 0 | 0 | 0 | 0 |
| 76  | 77  | 1 | 0 | 0 | 0 | 0 |
| 76  | 78  | 1 | 0 | 0 | 0 | 0 |
| 76  | 79  | 1 | 0 | 0 | 0 | 0 |
| 79  | 80  | 1 | 0 | 0 | 0 | 0 |
| 79  | 81  | 1 | 0 | 0 | 0 | 0 |
| 79  | 83  | 1 | 0 | 0 | 0 | 0 |
| 83  | 84  | 1 | 0 | 0 | 0 | 0 |
| 83  | 85  | 1 | 0 | 0 | 0 | 0 |
| 86  | 87  | 1 | 0 | 0 | 0 | 0 |
| 86  | 88  | 1 | 0 | 0 | 0 | 0 |
| 88  | 89  | 1 | 0 | 0 | 0 | 0 |
| 88  | 90  | 1 | 0 | 0 | 0 | 0 |
| 88  | 91  | 1 | 0 | 0 | 0 | 0 |
| 91  | 92  | 1 | 0 | 0 | 0 | 0 |
| 91  | 93  | 1 | 0 | 0 | 0 | 0 |
| 91  | 94  | 1 | 0 | 0 | 0 | 0 |
| 94  | 95  | 1 | 0 | 0 | 0 | 0 |
| 94  | 96  | 1 | 0 | 0 | 0 | 0 |
| 94  | 97  | 1 | 0 | 0 | 0 | 0 |
| 97  | 110 | 1 | 0 | 0 | 0 | 0 |
| 98  | 99  | 1 | 0 | 0 | 0 | 0 |
| 98  | 100 | 1 | 0 | 0 | 0 | 0 |
| 98  | 101 | 1 | 0 | 0 | 0 | 0 |
| 98  | 125 | 1 | 0 | 0 | 0 | 0 |
| 101 | 102 | 1 | 0 | 0 | 0 | 0 |
| 102 | 103 | 1 | 0 | 0 | 0 | 0 |
| 102 | 109 | 2 | 0 | 0 | 0 | 0 |
| 103 | 104 | 1 | 0 | 0 | 0 | 0 |
| 103 | 105 | 1 | 0 | 0 | 0 | 0 |
| 103 | 106 | 1 | 0 | 0 | 0 | 0 |
| 106 | 107 | 1 | 0 | 0 | 0 | 0 |
| 106 | 108 | 1 | 0 | 0 | 0 | 0 |
| 106 | 139 | 1 | 0 | 0 | 0 | 0 |
| 110 | 111 | 1 | 0 | 0 | 0 | 0 |
| 110 | 112 | 1 | 0 | 0 | 0 | 0 |
| 110 | 113 | 1 | 0 | 0 | 0 | 0 |
| 113 | 114 | 1 | 0 | 0 | 0 | 0 |
| 113 | 115 | 1 | 0 | 0 | 0 | 0 |
| 113 | 116 | 1 | 0 | 0 | 0 | 0 |
| 116 | 117 | 1 | 0 | 0 | 0 | 0 |
| 116 | 124 | 2 | 0 | 0 | 0 | 0 |
| 117 | 118 | 1 | 0 | 0 | 0 | 0 |
| 118 | 119 | 1 | 0 | 0 | 0 | 0 |
| 118 | 120 | 1 | 0 | 0 | 0 | 0 |
| 118 | 121 | 1 | 0 | 0 | 0 | 0 |
| 121 | 122 | 1 | 0 | 0 | 0 | 0 |
| 121 | 123 | 1 | 0 | 0 | 0 | 0 |
| 121 | 125 | 1 | 0 | 0 | 0 | 0 |
| 125 | 126 | 1 | 0 | 0 | 0 | 0 |
| 125 | 127 | 1 | 0 | 0 | 0 | 0 |
| 128 | 129 | 1 | 0 | 0 | 0 | 0 |
| 128 | 130 | 1 | 0 | 0 | 0 | 0 |
| 130 | 131 | 1 | 0 | 0 | 0 | 0 |
| 130 | 132 | 1 | 0 | 0 | 0 | 0 |
| 130 | 133 | 1 | 0 | 0 | 0 | 0 |
| 133 | 134 | 1 | 0 | 0 | 0 | 0 |
| 133 | 135 | 1 | 0 | 0 | 0 | 0 |

|        |   |   |   |   |   |
|--------|---|---|---|---|---|
| 133136 | 1 | 0 | 0 | 0 | 0 |
| 136137 | 1 | 0 | 0 | 0 | 0 |
| 136138 | 1 | 0 | 0 | 0 | 0 |
| 136139 | 1 | 0 | 0 | 0 | 0 |
| 139152 | 1 | 0 | 0 | 0 | 0 |
| 140141 | 1 | 0 | 0 | 0 | 0 |
| 140142 | 1 | 0 | 0 | 0 | 0 |
| 140143 | 1 | 0 | 0 | 0 | 0 |
| 140167 | 1 | 0 | 0 | 0 | 0 |
| 143144 | 1 | 0 | 0 | 0 | 0 |
| 144145 | 1 | 0 | 0 | 0 | 0 |
| 144151 | 2 | 0 | 0 | 0 | 0 |
| 145146 | 1 | 0 | 0 | 0 | 0 |
| 145147 | 1 | 0 | 0 | 0 | 0 |
| 145148 | 1 | 0 | 0 | 0 | 0 |
| 148149 | 1 | 0 | 0 | 0 | 0 |
| 148150 | 1 | 0 | 0 | 0 | 0 |
| 148181 | 1 | 0 | 0 | 0 | 0 |
| 152153 | 1 | 0 | 0 | 0 | 0 |
| 152154 | 1 | 0 | 0 | 0 | 0 |
| 152155 | 1 | 0 | 0 | 0 | 0 |
| 155156 | 1 | 0 | 0 | 0 | 0 |
| 155157 | 1 | 0 | 0 | 0 | 0 |
| 155158 | 1 | 0 | 0 | 0 | 0 |
| 158159 | 1 | 0 | 0 | 0 | 0 |
| 158166 | 2 | 0 | 0 | 0 | 0 |
| 159160 | 1 | 0 | 0 | 0 | 0 |
| 160161 | 1 | 0 | 0 | 0 | 0 |
| 160162 | 1 | 0 | 0 | 0 | 0 |
| 160163 | 1 | 0 | 0 | 0 | 0 |
| 163164 | 1 | 0 | 0 | 0 | 0 |
| 163165 | 1 | 0 | 0 | 0 | 0 |
| 163167 | 1 | 0 | 0 | 0 | 0 |
| 167168 | 1 | 0 | 0 | 0 | 0 |
| 167169 | 1 | 0 | 0 | 0 | 0 |
| 170171 | 1 | 0 | 0 | 0 | 0 |
| 170172 | 1 | 0 | 0 | 0 | 0 |
| 172173 | 1 | 0 | 0 | 0 | 0 |
| 172174 | 1 | 0 | 0 | 0 | 0 |
| 172175 | 1 | 0 | 0 | 0 | 0 |
| 175176 | 1 | 0 | 0 | 0 | 0 |
| 175177 | 1 | 0 | 0 | 0 | 0 |
| 175178 | 1 | 0 | 0 | 0 | 0 |
| 178179 | 1 | 0 | 0 | 0 | 0 |
| 178180 | 1 | 0 | 0 | 0 | 0 |
| 178181 | 1 | 0 | 0 | 0 | 0 |
| 181195 | 1 | 0 | 0 | 0 | 0 |
| 182183 | 1 | 0 | 0 | 0 | 0 |
| 182184 | 1 | 0 | 0 | 0 | 0 |
| 182185 | 1 | 0 | 0 | 0 | 0 |
| 182210 | 1 | 0 | 0 | 0 | 0 |
| 185186 | 1 | 0 | 0 | 0 | 0 |
| 186187 | 1 | 0 | 0 | 0 | 0 |
| 186194 | 2 | 0 | 0 | 0 | 0 |
| 187188 | 1 | 0 | 0 | 0 | 0 |
| 187189 | 1 | 0 | 0 | 0 | 0 |
| 187190 | 1 | 0 | 0 | 0 | 0 |
| 190191 | 1 | 0 | 0 | 0 | 0 |
| 190192 | 1 | 0 | 0 | 0 | 0 |
| 190193 | 1 | 0 | 0 | 0 | 0 |
| 195196 | 1 | 0 | 0 | 0 | 0 |
| 195197 | 1 | 0 | 0 | 0 | 0 |
| 195198 | 1 | 0 | 0 | 0 | 0 |
| 198199 | 1 | 0 | 0 | 0 | 0 |
| 198200 | 1 | 0 | 0 | 0 | 0 |
| 198201 | 1 | 0 | 0 | 0 | 0 |
| 201202 | 1 | 0 | 0 | 0 | 0 |
| 201209 | 2 | 0 | 0 | 0 | 0 |
| 202203 | 1 | 0 | 0 | 0 | 0 |
| 203204 | 1 | 0 | 0 | 0 | 0 |
| 203205 | 1 | 0 | 0 | 0 | 0 |
| 203206 | 1 | 0 | 0 | 0 | 0 |
| 206207 | 1 | 0 | 0 | 0 | 0 |
| 206208 | 1 | 0 | 0 | 0 | 0 |
| 206210 | 1 | 0 | 0 | 0 | 0 |
| 210211 | 1 | 0 | 0 | 0 | 0 |
| 210212 | 1 | 0 | 0 | 0 | 0 |

M END  
> <NAME>  
C20\_1







|         |         |         |   |   |   |   |   |   |   |   |   |   |   |   |   |
|---------|---------|---------|---|---|---|---|---|---|---|---|---|---|---|---|---|
| 45.0820 | 9.7000  | 3.3250  | H | 0 | 0 | 0 | 0 | 0 | 0 | 0 | 0 | 0 | 0 | 0 | 0 |
| 46.4650 | 8.9980  | 4.7790  | C | 0 | 0 | 0 | 0 | 0 | 0 | 0 | 0 | 0 | 0 | 0 | 0 |
| 45.7500 | 8.6270  | 5.5240  | H | 0 | 0 | 0 | 0 | 0 | 0 | 0 | 0 | 0 | 0 | 0 | 0 |
| 47.3760 | 8.4000  | 4.8820  | H | 0 | 0 | 0 | 0 | 0 | 0 | 0 | 0 | 0 | 0 | 0 | 0 |
| 46.8000 | 10.4210 | 5.1470  | C | 0 | 0 | 0 | 0 | 0 | 0 | 0 | 0 | 0 | 0 | 0 | 0 |
| 47.7540 | 10.9230 | 4.3150  | O | 0 | 0 | 0 | 0 | 0 | 0 | 0 | 0 | 0 | 0 | 0 | 0 |
| 48.1430 | 12.2730 | 4.6020  | C | 0 | 0 | 0 | 0 | 0 | 0 | 0 | 0 | 0 | 0 | 0 | 0 |
| 47.2550 | 12.9160 | 4.6370  | H | 0 | 0 | 0 | 0 | 0 | 0 | 0 | 0 | 0 | 0 | 0 | 0 |
| 48.6540 | 12.3000 | 5.5710  | H | 0 | 0 | 0 | 0 | 0 | 0 | 0 | 0 | 0 | 0 | 0 | 0 |
| 49.0790 | 12.7410 | 3.4960  | C | 0 | 0 | 0 | 0 | 0 | 0 | 0 | 0 | 0 | 0 | 0 | 0 |
| 49.9400 | 12.0640 | 3.4340  | H | 0 | 0 | 0 | 0 | 0 | 0 | 0 | 0 | 0 | 0 | 0 | 0 |
| 48.5660 | 12.6630 | 2.5290  | H | 0 | 0 | 0 | 0 | 0 | 0 | 0 | 0 | 0 | 0 | 0 | 0 |
| 46.2930 | 11.0200 | 6.0870  | O | 0 | 0 | 0 | 0 | 0 | 0 | 0 | 0 | 0 | 0 | 0 | 0 |
| 49.5460 | 14.1710 | 3.7350  | C | 0 | 0 | 0 | 0 | 0 | 0 | 0 | 0 | 0 | 0 | 0 | 0 |
| 50.0810 | 14.2400 | 4.6910  | H | 0 | 0 | 0 | 0 | 0 | 0 | 0 | 0 | 0 | 0 | 0 | 0 |
| 48.6840 | 14.8430 | 3.8260  | H | 0 | 0 | 0 | 0 | 0 | 0 | 0 | 0 | 0 | 0 | 0 | 0 |
| 52.7100 | 20.1030 | 4.6270  | O | 0 | 0 | 0 | 0 | 0 | 0 | 0 | 0 | 0 | 0 | 0 | 0 |
| 52.7960 | 21.0620 | 4.7570  | H | 0 | 0 | 0 | 0 | 0 | 0 | 0 | 0 | 0 | 0 | 0 | 0 |
| 53.8370 | 19.5020 | 5.2630  | C | 0 | 0 | 0 | 0 | 0 | 0 | 0 | 0 | 0 | 0 | 0 | 0 |
| 54.7530 | 19.9290 | 4.8390  | H | 0 | 0 | 0 | 0 | 0 | 0 | 0 | 0 | 0 | 0 | 0 | 0 |
| 53.7880 | 19.8050 | 6.3130  | H | 0 | 0 | 0 | 0 | 0 | 0 | 0 | 0 | 0 | 0 | 0 | 0 |
| 53.8260 | 17.9520 | 5.1050  | C | 0 | 0 | 0 | 0 | 0 | 0 | 0 | 0 | 0 | 0 | 0 | 0 |
| 52.7920 | 17.6070 | 5.2390  | H | 0 | 0 | 0 | 0 | 0 | 0 | 0 | 0 | 0 | 0 | 0 | 0 |
| 54.6650 | 17.3640 | 6.2740  | C | 0 | 0 | 0 | 0 | 0 | 0 | 0 | 0 | 0 | 0 | 0 | 0 |
| 54.6110 | 16.2740 | 6.3030  | H | 0 | 0 | 0 | 0 | 0 | 0 | 0 | 0 | 0 | 0 | 0 | 0 |
| 55.7140 | 17.6680 | 6.1900  | H | 0 | 0 | 0 | 0 | 0 | 0 | 0 | 0 | 0 | 0 | 0 | 0 |
| 54.1660 | 17.8050 | 7.5350  | O | 0 | 0 | 0 | 0 | 0 | 0 | 0 | 0 | 0 | 0 | 0 | 0 |
| 54.7500 | 17.4370 | 8.2210  | H | 0 | 0 | 0 | 0 | 0 | 0 | 0 | 0 | 0 | 0 | 0 | 0 |
| 54.3210 | 17.5060 | 3.7560  | N | 0 | 0 | 3 | 0 | 0 | 0 | 0 | 0 | 0 | 0 | 0 | 0 |
| 57.7330 | 10.1500 | -1.6900 | C | 0 | 0 | 0 | 0 | 0 | 0 | 0 | 0 | 0 | 0 | 0 | 0 |
| 58.7310 | 10.6010 | -1.6520 | H | 0 | 0 | 0 | 0 | 0 | 0 | 0 | 0 | 0 | 0 | 0 | 0 |
| 57.1790 | 10.5520 | -2.5460 | H | 0 | 0 | 0 | 0 | 0 | 0 | 0 | 0 | 0 | 0 | 0 | 0 |
| 57.8570 | 8.7280  | -1.8260 | O | 0 | 0 | 0 | 0 | 0 | 0 | 0 | 0 | 0 | 0 | 0 | 0 |
| 58.5180 | 8.3240  | -2.9490 | C | 0 | 0 | 0 | 0 | 0 | 0 | 0 | 0 | 0 | 0 | 0 | 0 |
| 58.5800 | 6.8160  | -2.9750 | C | 0 | 0 | 0 | 0 | 0 | 0 | 0 | 0 | 0 | 0 | 0 | 0 |
| 59.0980 | 6.4740  | -2.0730 | H | 0 | 0 | 0 | 0 | 0 | 0 | 0 | 0 | 0 | 0 | 0 | 0 |
| 57.5560 | 6.4260  | -2.9690 | H | 0 | 0 | 0 | 0 | 0 | 0 | 0 | 0 | 0 | 0 | 0 | 0 |
| 59.3090 | 6.2950  | -4.2010 | C | 0 | 0 | 0 | 0 | 0 | 0 | 0 | 0 | 0 | 0 | 0 | 0 |
| 58.8100 | 6.6170  | -5.1220 | H | 0 | 0 | 0 | 0 | 0 | 0 | 0 | 0 | 0 | 0 | 0 | 0 |
| 59.3370 | 5.2010  | -4.1920 | H | 0 | 0 | 0 | 0 | 0 | 0 | 0 | 0 | 0 | 0 | 0 | 0 |
| 60.3390 | 6.6640  | -4.2330 | H | 0 | 0 | 0 | 0 | 0 | 0 | 0 | 0 | 0 | 0 | 0 | 0 |
| 58.9840 | 9.0690  | -3.7990 | O | 0 | 0 | 0 | 0 | 0 | 0 | 0 | 0 | 0 | 0 | 0 | 0 |
| 54.4270 | 16.0380 | 3.6330  | C | 0 | 0 | 0 | 0 | 0 | 0 | 0 | 0 | 0 | 0 | 0 | 0 |
| 55.0540 | 15.6520 | 4.4430  | H | 0 | 0 | 0 | 0 | 0 | 0 | 0 | 0 | 0 | 0 | 0 | 0 |
| 53.4470 | 15.5650 | 3.7600  | H | 0 | 0 | 0 | 0 | 0 | 0 | 0 | 0 | 0 | 0 | 0 | 0 |
| 55.1110 | 15.5430 | 2.3520  | C | 0 | 0 | 0 | 0 | 0 | 0 | 0 | 0 | 0 | 0 | 0 | 0 |
| 54.5560 | 15.8210 | 1.4540  | H | 0 | 0 | 0 | 0 | 0 | 0 | 0 | 0 | 0 | 0 | 0 | 0 |
| 56.1240 | 15.9570 | 2.2920  | H | 0 | 0 | 0 | 0 | 0 | 0 | 0 | 0 | 0 | 0 | 0 | 0 |
| 55.2090 | 14.0380 | 2.3490  | C | 0 | 0 | 0 | 0 | 0 | 0 | 0 | 0 | 0 | 0 | 0 | 0 |
| 55.9190 | 13.6360 | 1.2570  | O | 0 | 0 | 0 | 0 | 0 | 0 | 0 | 0 | 0 | 0 | 0 | 0 |
| 56.0420 | 12.2140 | 1.1220  | C | 0 | 0 | 0 | 0 | 0 | 0 | 0 | 0 | 0 | 0 | 0 | 0 |
| 56.5900 | 11.8130 | 1.9820  | H | 0 | 0 | 0 | 0 | 0 | 0 | 0 | 0 | 0 | 0 | 0 | 0 |
| 55.0440 | 11.7620 | 1.0780  | H | 0 | 0 | 0 | 0 | 0 | 0 | 0 | 0 | 0 | 0 | 0 | 0 |
| 56.8020 | 11.9300 | -0.1670 | C | 0 | 0 | 0 | 0 | 0 | 0 | 0 | 0 | 0 | 0 | 0 | 0 |
| 56.2680 | 12.3840 | -1.0110 | H | 0 | 0 | 0 | 0 | 0 | 0 | 0 | 0 | 0 | 0 | 0 | 0 |
| 57.7800 | 12.4270 | -0.1290 | H | 0 | 0 | 0 | 0 | 0 | 0 | 0 | 0 | 0 | 0 | 0 | 0 |
| 54.7150 | 13.2940 | 3.1840  | O | 0 | 0 | 0 | 0 | 0 | 0 | 0 | 0 | 0 | 0 | 0 | 0 |
| 56.9780 | 10.4340 | -0.3960 | C | 0 | 0 | 0 | 0 | 0 | 0 | 0 | 0 | 0 | 0 | 0 | 0 |
| 56.0010 | 9.9360  | -0.4300 | H | 0 | 0 | 0 | 0 | 0 | 0 | 0 | 0 | 0 | 0 | 0 | 0 |
| 57.5170 | 9.9810  | 0.4450  | H | 0 | 0 | 0 | 0 | 0 | 0 | 0 | 0 | 0 | 0 | 0 | 0 |

|    |    |   |   |   |   |   |
|----|----|---|---|---|---|---|
| 1  | 2  | 1 | 0 | 0 | 0 | 0 |
| 1  | 3  | 1 | 0 | 0 | 0 | 0 |
| 3  | 4  | 1 | 0 | 0 | 0 | 0 |
| 3  | 5  | 1 | 0 | 0 | 0 | 0 |
| 3  | 6  | 1 | 0 | 0 | 0 | 0 |
| 6  | 7  | 1 | 0 | 0 | 0 | 0 |
| 6  | 8  | 1 | 0 | 0 | 0 | 0 |
| 6  | 13 | 1 | 0 | 0 | 0 | 0 |
| 8  | 9  | 1 | 0 | 0 | 0 | 0 |
| 8  | 10 | 1 | 0 | 0 | 0 | 0 |
| 8  | 11 | 1 | 0 | 0 | 0 | 0 |
| 11 | 12 | 1 | 0 | 0 | 0 | 0 |
| 13 | 14 | 1 | 0 | 0 | 0 | 0 |
| 13 | 27 | 1 | 0 | 0 | 0 | 0 |
| 15 | 16 | 1 | 0 | 0 | 0 | 0 |
| 15 | 17 | 1 | 0 | 0 | 0 | 0 |
| 15 | 18 | 1 | 0 | 0 | 0 | 0 |
| 15 | 42 | 1 | 0 | 0 | 0 | 0 |
| 18 | 19 | 1 | 0 | 0 | 0 | 0 |
| 19 | 20 | 1 | 0 | 0 | 0 | 0 |
| 19 | 26 | 2 | 0 | 0 | 0 | 0 |

|     |     |   |   |   |   |   |
|-----|-----|---|---|---|---|---|
| 20  | 21  | 1 | 0 | 0 | 0 | 0 |
| 20  | 22  | 1 | 0 | 0 | 0 | 0 |
| 20  | 23  | 1 | 0 | 0 | 0 | 0 |
| 23  | 24  | 1 | 0 | 0 | 0 | 0 |
| 23  | 25  | 1 | 0 | 0 | 0 | 0 |
| 23  | 57  | 1 | 0 | 0 | 0 | 0 |
| 27  | 28  | 1 | 0 | 0 | 0 | 0 |
| 27  | 29  | 1 | 0 | 0 | 0 | 0 |
| 27  | 30  | 1 | 0 | 0 | 0 | 0 |
| 30  | 31  | 1 | 0 | 0 | 0 | 0 |
| 30  | 32  | 1 | 0 | 0 | 0 | 0 |
| 30  | 33  | 1 | 0 | 0 | 0 | 0 |
| 33  | 34  | 1 | 0 | 0 | 0 | 0 |
| 33  | 41  | 2 | 0 | 0 | 0 | 0 |
| 34  | 35  | 1 | 0 | 0 | 0 | 0 |
| 35  | 36  | 1 | 0 | 0 | 0 | 0 |
| 35  | 37  | 1 | 0 | 0 | 0 | 0 |
| 35  | 38  | 1 | 0 | 0 | 0 | 0 |
| 38  | 39  | 1 | 0 | 0 | 0 | 0 |
| 38  | 40  | 1 | 0 | 0 | 0 | 0 |
| 38  | 42  | 1 | 0 | 0 | 0 | 0 |
| 42  | 43  | 1 | 0 | 0 | 0 | 0 |
| 42  | 44  | 1 | 0 | 0 | 0 | 0 |
| 45  | 46  | 1 | 0 | 0 | 0 | 0 |
| 45  | 47  | 1 | 0 | 0 | 0 | 0 |
| 47  | 48  | 1 | 0 | 0 | 0 | 0 |
| 47  | 49  | 1 | 0 | 0 | 0 | 0 |
| 47  | 50  | 1 | 0 | 0 | 0 | 0 |
| 50  | 51  | 1 | 0 | 0 | 0 | 0 |
| 50  | 52  | 1 | 0 | 0 | 0 | 0 |
| 50  | 57  | 1 | 0 | 0 | 0 | 0 |
| 52  | 53  | 1 | 0 | 0 | 0 | 0 |
| 52  | 54  | 1 | 0 | 0 | 0 | 0 |
| 52  | 55  | 1 | 0 | 0 | 0 | 0 |
| 55  | 56  | 1 | 0 | 0 | 0 | 0 |
| 57  | 70  | 1 | 0 | 0 | 0 | 0 |
| 58  | 59  | 1 | 0 | 0 | 0 | 0 |
| 58  | 60  | 1 | 0 | 0 | 0 | 0 |
| 58  | 61  | 1 | 0 | 0 | 0 | 0 |
| 58  | 85  | 1 | 0 | 0 | 0 | 0 |
| 61  | 62  | 1 | 0 | 0 | 0 | 0 |
| 62  | 63  | 1 | 0 | 0 | 0 | 0 |
| 62  | 69  | 2 | 0 | 0 | 0 | 0 |
| 63  | 64  | 1 | 0 | 0 | 0 | 0 |
| 63  | 65  | 1 | 0 | 0 | 0 | 0 |
| 63  | 66  | 1 | 0 | 0 | 0 | 0 |
| 66  | 67  | 1 | 0 | 0 | 0 | 0 |
| 66  | 68  | 1 | 0 | 0 | 0 | 0 |
| 66  | 100 | 1 | 0 | 0 | 0 | 0 |
| 70  | 71  | 1 | 0 | 0 | 0 | 0 |
| 70  | 72  | 1 | 0 | 0 | 0 | 0 |
| 70  | 73  | 1 | 0 | 0 | 0 | 0 |
| 73  | 74  | 1 | 0 | 0 | 0 | 0 |
| 73  | 75  | 1 | 0 | 0 | 0 | 0 |
| 73  | 76  | 1 | 0 | 0 | 0 | 0 |
| 76  | 77  | 1 | 0 | 0 | 0 | 0 |
| 76  | 84  | 2 | 0 | 0 | 0 | 0 |
| 77  | 78  | 1 | 0 | 0 | 0 | 0 |
| 78  | 79  | 1 | 0 | 0 | 0 | 0 |
| 78  | 80  | 1 | 0 | 0 | 0 | 0 |
| 78  | 81  | 1 | 0 | 0 | 0 | 0 |
| 81  | 82  | 1 | 0 | 0 | 0 | 0 |
| 81  | 83  | 1 | 0 | 0 | 0 | 0 |
| 81  | 85  | 1 | 0 | 0 | 0 | 0 |
| 85  | 86  | 1 | 0 | 0 | 0 | 0 |
| 85  | 87  | 1 | 0 | 0 | 0 | 0 |
| 88  | 89  | 1 | 0 | 0 | 0 | 0 |
| 88  | 90  | 1 | 0 | 0 | 0 | 0 |
| 90  | 91  | 1 | 0 | 0 | 0 | 0 |
| 90  | 92  | 1 | 0 | 0 | 0 | 0 |
| 90  | 93  | 1 | 0 | 0 | 0 | 0 |
| 93  | 94  | 1 | 0 | 0 | 0 | 0 |
| 93  | 95  | 1 | 0 | 0 | 0 | 0 |
| 93  | 100 | 1 | 0 | 0 | 0 | 0 |
| 95  | 96  | 1 | 0 | 0 | 0 | 0 |
| 95  | 97  | 1 | 0 | 0 | 0 | 0 |
| 95  | 98  | 1 | 0 | 0 | 0 | 0 |
| 98  | 99  | 1 | 0 | 0 | 0 | 0 |
| 100 | 113 | 1 | 0 | 0 | 0 | 0 |
| 101 | 102 | 1 | 0 | 0 | 0 | 0 |
| 101 | 103 | 1 | 0 | 0 | 0 | 0 |

|        |   |   |   |   |   |
|--------|---|---|---|---|---|
| 101104 | 1 | 0 | 0 | 0 | 0 |
| 101128 | 1 | 0 | 0 | 0 | 0 |
| 104105 | 1 | 0 | 0 | 0 | 0 |
| 105106 | 1 | 0 | 0 | 0 | 0 |
| 105112 | 2 | 0 | 0 | 0 | 0 |
| 106107 | 1 | 0 | 0 | 0 | 0 |
| 106108 | 1 | 0 | 0 | 0 | 0 |
| 106109 | 1 | 0 | 0 | 0 | 0 |
| 109110 | 1 | 0 | 0 | 0 | 0 |
| 109111 | 1 | 0 | 0 | 0 | 0 |
| 109143 | 1 | 0 | 0 | 0 | 0 |
| 113114 | 1 | 0 | 0 | 0 | 0 |
| 113115 | 1 | 0 | 0 | 0 | 0 |
| 113116 | 1 | 0 | 0 | 0 | 0 |
| 116117 | 1 | 0 | 0 | 0 | 0 |
| 116118 | 1 | 0 | 0 | 0 | 0 |
| 116119 | 1 | 0 | 0 | 0 | 0 |
| 119120 | 1 | 0 | 0 | 0 | 0 |
| 119127 | 2 | 0 | 0 | 0 | 0 |
| 120121 | 1 | 0 | 0 | 0 | 0 |
| 121122 | 1 | 0 | 0 | 0 | 0 |
| 121123 | 1 | 0 | 0 | 0 | 0 |
| 121124 | 1 | 0 | 0 | 0 | 0 |
| 124125 | 1 | 0 | 0 | 0 | 0 |
| 124126 | 1 | 0 | 0 | 0 | 0 |
| 124128 | 1 | 0 | 0 | 0 | 0 |
| 128129 | 1 | 0 | 0 | 0 | 0 |
| 128130 | 1 | 0 | 0 | 0 | 0 |
| 131132 | 1 | 0 | 0 | 0 | 0 |
| 131133 | 1 | 0 | 0 | 0 | 0 |
| 133134 | 1 | 0 | 0 | 0 | 0 |
| 133135 | 1 | 0 | 0 | 0 | 0 |
| 133136 | 1 | 0 | 0 | 0 | 0 |
| 136137 | 1 | 0 | 0 | 0 | 0 |
| 136138 | 1 | 0 | 0 | 0 | 0 |
| 136143 | 1 | 0 | 0 | 0 | 0 |
| 138139 | 1 | 0 | 0 | 0 | 0 |
| 138140 | 1 | 0 | 0 | 0 | 0 |
| 138141 | 1 | 0 | 0 | 0 | 0 |
| 141142 | 1 | 0 | 0 | 0 | 0 |
| 143156 | 1 | 0 | 0 | 0 | 0 |
| 144145 | 1 | 0 | 0 | 0 | 0 |
| 144146 | 1 | 0 | 0 | 0 | 0 |
| 144147 | 1 | 0 | 0 | 0 | 0 |
| 144171 | 1 | 0 | 0 | 0 | 0 |
| 147148 | 1 | 0 | 0 | 0 | 0 |
| 148149 | 1 | 0 | 0 | 0 | 0 |
| 148155 | 2 | 0 | 0 | 0 | 0 |
| 149150 | 1 | 0 | 0 | 0 | 0 |
| 149151 | 1 | 0 | 0 | 0 | 0 |
| 149152 | 1 | 0 | 0 | 0 | 0 |
| 152153 | 1 | 0 | 0 | 0 | 0 |
| 152154 | 1 | 0 | 0 | 0 | 0 |
| 152186 | 1 | 0 | 0 | 0 | 0 |
| 156157 | 1 | 0 | 0 | 0 | 0 |
| 156158 | 1 | 0 | 0 | 0 | 0 |
| 156159 | 1 | 0 | 0 | 0 | 0 |
| 159160 | 1 | 0 | 0 | 0 | 0 |
| 159161 | 1 | 0 | 0 | 0 | 0 |
| 159162 | 1 | 0 | 0 | 0 | 0 |
| 162163 | 1 | 0 | 0 | 0 | 0 |
| 162170 | 2 | 0 | 0 | 0 | 0 |
| 163164 | 1 | 0 | 0 | 0 | 0 |
| 164165 | 1 | 0 | 0 | 0 | 0 |
| 164166 | 1 | 0 | 0 | 0 | 0 |
| 164167 | 1 | 0 | 0 | 0 | 0 |
| 167168 | 1 | 0 | 0 | 0 | 0 |
| 167169 | 1 | 0 | 0 | 0 | 0 |
| 167171 | 1 | 0 | 0 | 0 | 0 |
| 171172 | 1 | 0 | 0 | 0 | 0 |
| 171173 | 1 | 0 | 0 | 0 | 0 |
| 174175 | 1 | 0 | 0 | 0 | 0 |
| 174176 | 1 | 0 | 0 | 0 | 0 |
| 176177 | 1 | 0 | 0 | 0 | 0 |
| 176178 | 1 | 0 | 0 | 0 | 0 |
| 176179 | 1 | 0 | 0 | 0 | 0 |
| 179180 | 1 | 0 | 0 | 0 | 0 |
| 179181 | 1 | 0 | 0 | 0 | 0 |
| 179186 | 1 | 0 | 0 | 0 | 0 |
| 181182 | 1 | 0 | 0 | 0 | 0 |
| 181183 | 1 | 0 | 0 | 0 | 0 |

181184 1 0 0 0 0  
184185 1 0 0 0 0  
186200 1 0 0 0 0  
187188 1 0 0 0 0  
187189 1 0 0 0 0  
187190 1 0 0 0 0  
187215 1 0 0 0 0  
190191 1 0 0 0 0  
191192 1 0 0 0 0  
191199 2 0 0 0 0  
192193 1 0 0 0 0  
192194 1 0 0 0 0  
192195 1 0 0 0 0  
195196 1 0 0 0 0  
195197 1 0 0 0 0  
195198 1 0 0 0 0  
200201 1 0 0 0 0  
200202 1 0 0 0 0  
200203 1 0 0 0 0  
203204 1 0 0 0 0  
203205 1 0 0 0 0  
203206 1 0 0 0 0  
206207 1 0 0 0 0  
206214 2 0 0 0 0  
207208 1 0 0 0 0  
208209 1 0 0 0 0  
208210 1 0 0 0 0  
208211 1 0 0 0 0  
211212 1 0 0 0 0  
211213 1 0 0 0 0  
211215 1 0 0 0 0  
215216 1 0 0 0 0  
215217 1 0 0 0 0

M END  
> <NAME>  
C25\_1

\$\$\$  
C28\_1  
MOE2012 3D

227226 0 0 1 0 0 0 0 0999 V2000  
21.1570 -1.1850 -27.7480 O 0 0 0 0 0 0 0 0 0 0 0 0 0 0 0 0  
21.1490 -1.0610 -28.7130 H 0 0 0 0 0 0 0 0 0 0 0 0 0 0 0 0  
20.9860 0.0960 -27.1610 C 0 0 0 0 0 0 0 0 0 0 0 0 0 0 0 0  
21.8080 0.7410 -27.4860 H 0 0 0 0 0 0 0 0 0 0 0 0 0 0 0 0  
20.0390 0.5200 -27.5120 H 0 0 0 0 0 0 0 0 0 0 0 0 0 0 0 0  
20.9820 -0.0640 -25.6500 C 0 0 0 0 0 0 0 0 0 0 0 0 0 0 0 0  
20.1740 -0.7470 -25.3580 H 0 0 0 0 0 0 0 0 0 0 0 0 0 0 0 0  
21.9130 -0.5530 -25.3360 H 0 0 0 0 0 0 0 0 0 0 0 0 0 0 0 0  
20.8250 1.2780 -24.9400 C 0 0 0 0 0 0 0 0 0 0 0 0 0 0 0 0  
21.6370 1.9490 -25.2450 H 0 0 0 0 0 0 0 0 0 0 0 0 0 0 0 0  
19.8820 1.7480 -25.2450 H 0 0 0 0 0 0 0 0 0 0 0 0 0 0 0 0  
20.8470 1.0890 -23.4230 C 0 0 0 0 0 0 0 0 0 0 0 0 0 0 0 0  
20.0180 0.4350 -23.1280 H 0 0 0 0 0 0 0 0 0 0 0 0 0 0 0 0  
21.7840 0.5980 -23.1410 H 0 0 0 0 0 0 0 0 0 0 0 0 0 0 0 0  
20.7200 2.3870 -22.7640 N 0 0 0 3 0 0 0 0 0 0 0 0 0 0 0 0  
21.4790 3.0030 -23.0530 H 0 0 0 0 0 0 0 0 0 0 0 0 0 0 0 0  
26.2660 0.9480 -14.8960 C 0 0 0 0 0 0 0 0 0 0 0 0 0 0 0 0  
26.9080 1.7640 -15.2500 H 0 0 0 0 0 0 0 0 0 0 0 0 0 0 0 0  
26.6210 -0.0040 -15.3070 H 0 0 0 0 0 0 0 0 0 0 0 0 0 0 0 0  
26.3080 0.8930 -13.4630 O 0 0 0 0 0 0 0 0 0 0 0 0 0 0 0 0  
27.5550 0.7190 -12.9370 C 0 0 0 0 0 0 0 0 0 0 0 0 0 0 0 0  
27.4750 0.6950 -11.4300 C 0 0 0 0 0 0 0 0 0 0 0 0 0 0 0 0  
26.9420 1.5980 -11.1170 H 0 0 0 0 0 0 0 0 0 0 0 0 0 0 0 0  
26.8920 -0.1840 -11.1300 H 0 0 0 0 0 0 0 0 0 0 0 0 0 0 0 0  
28.8770 0.6300 -10.8100 C 0 0 0 0 0 0 0 0 0 0 0 0 0 0 0 0  
29.3430 -0.2950 -11.1700 H 0 0 0 0 0 0 0 0 0 0 0 0 0 0 0 0  
29.5060 1.4510 -11.1800 H 0 0 0 0 0 0 0 0 0 0 0 0 0 0 0 0  
28.5830 0.5980 -13.5880 O 0 0 0 0 0 0 0 0 0 0 0 0 0 0 0 0  
20.6870 2.2740 -21.3040 C 0 0 0 0 0 0 0 0 0 0 0 0 0 0 0 0  
20.3480 3.2400 -20.9080 H 0 0 0 0 0 0 0 0 0 0 0 0 0 0 0 0  
19.9270 1.5450 -20.9960 H 0 0 0 0 0 0 0 0 0 0 0 0 0 0 0 0  
22.0460 1.9370 -20.6920 C 0 0 0 0 0 0 0 0 0 0 0 0 0 0 0 0  
22.4020 0.9630 -21.0420 H 0 0 0 0 0 0 0 0 0 0 0 0 0 0 0 0  
22.7780 2.7060 -20.9620 H 0 0 0 0 0 0 0 0 0 0 0 0 0 0 0 0  
21.9570 1.8720 -19.1900 C 0 0 0 0 0 0 0 0 0 0 0 0 0 0 0 0  
23.1970 1.6300 -18.6750 O 0 0 0 0 0 0 0 0 0 0 0 0 0 0 0 0  
23.2390 1.5480 -17.2440 C 0 0 0 0 0 0 0 0 0 0 0 0 0 0 0 0  
22.8860 2.4920 -16.8140 H 0 0 0 0 0 0 0 0 0 0 0 0 0 0 0 0  
22.5960 0.7270 -16.9070 H 0 0 0 0 0 0 0 0 0 0 0 0 0 0 0 0





|         |          |          |   |   |   |   |   |   |   |   |   |   |   |   |   |
|---------|----------|----------|---|---|---|---|---|---|---|---|---|---|---|---|---|
| 38.7130 | -16.9140 | -9.7160  | C | 0 | 0 | 0 | 0 | 0 | 0 | 0 | 0 | 0 | 0 | 0 | 0 |
| 39.0740 | -17.6930 | -10.3960 | H | 0 | 0 | 0 | 0 | 0 | 0 | 0 | 0 | 0 | 0 | 0 | 0 |
| 37.8990 | -17.3180 | -9.1060  | H | 0 | 0 | 0 | 0 | 0 | 0 | 0 | 0 | 0 | 0 | 0 | 0 |
| 38.1980 | -15.7380 | -10.5270 | C | 0 | 0 | 0 | 0 | 0 | 0 | 0 | 0 | 0 | 0 | 0 | 0 |
| 37.8260 | -14.9420 | -9.8730  | H | 0 | 0 | 0 | 0 | 0 | 0 | 0 | 0 | 0 | 0 | 0 | 0 |
| 37.3790 | -16.0540 | -11.1800 | H | 0 | 0 | 0 | 0 | 0 | 0 | 0 | 0 | 0 | 0 | 0 | 0 |
| 38.9900 | -15.3130 | -11.1530 | H | 0 | 0 | 0 | 0 | 0 | 0 | 0 | 0 | 0 | 0 | 0 | 0 |
| 40.3200 | -15.3950 | -8.6990  | O | 0 | 0 | 0 | 0 | 0 | 0 | 0 | 0 | 0 | 0 | 0 | 0 |
| 46.4960 | -21.5500 | -1.7520  | C | 0 | 0 | 0 | 0 | 0 | 0 | 0 | 0 | 0 | 0 | 0 | 0 |
| 46.7780 | -22.1700 | -2.6140  | H | 0 | 0 | 0 | 0 | 0 | 0 | 0 | 0 | 0 | 0 | 0 | 0 |
| 45.7810 | -22.1430 | -1.1660  | H | 0 | 0 | 0 | 0 | 0 | 0 | 0 | 0 | 0 | 0 | 0 | 0 |
| 45.8130 | -20.2970 | -2.3060  | C | 0 | 0 | 0 | 0 | 0 | 0 | 0 | 0 | 0 | 0 | 0 | 0 |
| 45.3970 | -19.6830 | -1.5020  | H | 0 | 0 | 0 | 0 | 0 | 0 | 0 | 0 | 0 | 0 | 0 | 0 |
| 46.5370 | -19.7070 | -2.8800  | H | 0 | 0 | 0 | 0 | 0 | 0 | 0 | 0 | 0 | 0 | 0 | 0 |
| 44.6760 | -20.6750 | -3.2220  | C | 0 | 0 | 0 | 0 | 0 | 0 | 0 | 0 | 0 | 0 | 0 | 0 |
| 44.2530 | -19.5730 | -3.9040  | O | 0 | 0 | 0 | 0 | 0 | 0 | 0 | 0 | 0 | 0 | 0 | 0 |
| 43.1680 | -19.8170 | -4.8100  | C | 0 | 0 | 0 | 0 | 0 | 0 | 0 | 0 | 0 | 0 | 0 | 0 |
| 43.4710 | -20.5670 | -5.5500  | H | 0 | 0 | 0 | 0 | 0 | 0 | 0 | 0 | 0 | 0 | 0 | 0 |
| 42.3010 | -20.1840 | -4.2480  | H | 0 | 0 | 0 | 0 | 0 | 0 | 0 | 0 | 0 | 0 | 0 | 0 |
| 42.8280 | -18.5030 | -5.5030  | C | 0 | 0 | 0 | 0 | 0 | 0 | 0 | 0 | 0 | 0 | 0 | 0 |
| 42.5700 | -17.7500 | -4.7480  | H | 0 | 0 | 0 | 0 | 0 | 0 | 0 | 0 | 0 | 0 | 0 | 0 |
| 43.7190 | -18.1210 | -6.0160  | H | 0 | 0 | 0 | 0 | 0 | 0 | 0 | 0 | 0 | 0 | 0 | 0 |
| 44.1950 | -21.7950 | -3.3230  | O | 0 | 0 | 0 | 0 | 0 | 0 | 0 | 0 | 0 | 0 | 0 | 0 |
| 41.6810 | -18.6740 | -6.4930  | C | 0 | 0 | 0 | 0 | 0 | 0 | 0 | 0 | 0 | 0 | 0 | 0 |
| 40.7900 | -19.0560 | -5.9800  | H | 0 | 0 | 0 | 0 | 0 | 0 | 0 | 0 | 0 | 0 | 0 | 0 |
| 41.9390 | -19.4280 | -7.2470  | H | 0 | 0 | 0 | 0 | 0 | 0 | 0 | 0 | 0 | 0 | 0 | 0 |
| 1       | 2        | 1        | 0 | 0 | 0 | 0 |   |   |   |   |   |   |   |   |   |
| 1       | 3        | 1        | 0 | 0 | 0 | 0 |   |   |   |   |   |   |   |   |   |
| 3       | 4        | 1        | 0 | 0 | 0 | 0 |   |   |   |   |   |   |   |   |   |
| 3       | 5        | 1        | 0 | 0 | 0 | 0 |   |   |   |   |   |   |   |   |   |
| 3       | 6        | 1        | 0 | 0 | 0 | 0 |   |   |   |   |   |   |   |   |   |
| 6       | 7        | 1        | 0 | 0 | 0 | 0 |   |   |   |   |   |   |   |   |   |
| 6       | 8        | 1        | 0 | 0 | 0 | 0 |   |   |   |   |   |   |   |   |   |
| 6       | 9        | 1        | 0 | 0 | 0 | 0 |   |   |   |   |   |   |   |   |   |
| 9       | 10       | 1        | 0 | 0 | 0 | 0 |   |   |   |   |   |   |   |   |   |
| 9       | 11       | 1        | 0 | 0 | 0 | 0 |   |   |   |   |   |   |   |   |   |
| 9       | 12       | 1        | 0 | 0 | 0 | 0 |   |   |   |   |   |   |   |   |   |
| 12      | 13       | 1        | 0 | 0 | 0 | 0 |   |   |   |   |   |   |   |   |   |
| 12      | 14       | 1        | 0 | 0 | 0 | 0 |   |   |   |   |   |   |   |   |   |
| 12      | 15       | 1        | 0 | 0 | 0 | 0 |   |   |   |   |   |   |   |   |   |
| 15      | 16       | 1        | 0 | 0 | 0 | 0 |   |   |   |   |   |   |   |   |   |
| 15      | 29       | 1        | 0 | 0 | 0 | 0 |   |   |   |   |   |   |   |   |   |
| 17      | 18       | 1        | 0 | 0 | 0 | 0 |   |   |   |   |   |   |   |   |   |
| 17      | 19       | 1        | 0 | 0 | 0 | 0 |   |   |   |   |   |   |   |   |   |
| 17      | 20       | 1        | 0 | 0 | 0 | 0 |   |   |   |   |   |   |   |   |   |
| 17      | 44       | 1        | 0 | 0 | 0 | 0 |   |   |   |   |   |   |   |   |   |
| 20      | 21       | 1        | 0 | 0 | 0 | 0 |   |   |   |   |   |   |   |   |   |
| 21      | 22       | 1        | 0 | 0 | 0 | 0 |   |   |   |   |   |   |   |   |   |
| 21      | 28       | 2        | 0 | 0 | 0 | 0 |   |   |   |   |   |   |   |   |   |
| 22      | 23       | 1        | 0 | 0 | 0 | 0 |   |   |   |   |   |   |   |   |   |
| 22      | 24       | 1        | 0 | 0 | 0 | 0 |   |   |   |   |   |   |   |   |   |
| 22      | 25       | 1        | 0 | 0 | 0 | 0 |   |   |   |   |   |   |   |   |   |
| 25      | 26       | 1        | 0 | 0 | 0 | 0 |   |   |   |   |   |   |   |   |   |
| 25      | 27       | 1        | 0 | 0 | 0 | 0 |   |   |   |   |   |   |   |   |   |
| 25      | 61       | 1        | 0 | 0 | 0 | 0 |   |   |   |   |   |   |   |   |   |
| 29      | 30       | 1        | 0 | 0 | 0 | 0 |   |   |   |   |   |   |   |   |   |
| 29      | 31       | 1        | 0 | 0 | 0 | 0 |   |   |   |   |   |   |   |   |   |
| 29      | 32       | 1        | 0 | 0 | 0 | 0 |   |   |   |   |   |   |   |   |   |
| 32      | 33       | 1        | 0 | 0 | 0 | 0 |   |   |   |   |   |   |   |   |   |
| 32      | 34       | 1        | 0 | 0 | 0 | 0 |   |   |   |   |   |   |   |   |   |
| 32      | 35       | 1        | 0 | 0 | 0 | 0 |   |   |   |   |   |   |   |   |   |
| 35      | 36       | 1        | 0 | 0 | 0 | 0 |   |   |   |   |   |   |   |   |   |
| 35      | 43       | 2        | 0 | 0 | 0 | 0 |   |   |   |   |   |   |   |   |   |
| 36      | 37       | 1        | 0 | 0 | 0 | 0 |   |   |   |   |   |   |   |   |   |
| 37      | 38       | 1        | 0 | 0 | 0 | 0 |   |   |   |   |   |   |   |   |   |
| 37      | 39       | 1        | 0 | 0 | 0 | 0 |   |   |   |   |   |   |   |   |   |
| 37      | 40       | 1        | 0 | 0 | 0 | 0 |   |   |   |   |   |   |   |   |   |
| 40      | 41       | 1        | 0 | 0 | 0 | 0 |   |   |   |   |   |   |   |   |   |
| 40      | 42       | 1        | 0 | 0 | 0 | 0 |   |   |   |   |   |   |   |   |   |
| 40      | 44       | 1        | 0 | 0 | 0 | 0 |   |   |   |   |   |   |   |   |   |
| 44      | 45       | 1        | 0 | 0 | 0 | 0 |   |   |   |   |   |   |   |   |   |
| 44      | 46       | 1        | 0 | 0 | 0 | 0 |   |   |   |   |   |   |   |   |   |
| 47      | 48       | 1        | 0 | 0 | 0 | 0 |   |   |   |   |   |   |   |   |   |
| 47      | 49       | 1        | 0 | 0 | 0 | 0 |   |   |   |   |   |   |   |   |   |
| 49      | 50       | 1        | 0 | 0 | 0 | 0 |   |   |   |   |   |   |   |   |   |
| 49      | 51       | 1        | 0 | 0 | 0 | 0 |   |   |   |   |   |   |   |   |   |
| 49      | 52       | 1        | 0 | 0 | 0 | 0 |   |   |   |   |   |   |   |   |   |
| 52      | 53       | 1        | 0 | 0 | 0 | 0 |   |   |   |   |   |   |   |   |   |
| 52      | 54       | 1        | 0 | 0 | 0 | 0 |   |   |   |   |   |   |   |   |   |
| 52      | 55       | 1        | 0 | 0 | 0 | 0 |   |   |   |   |   |   |   |   |   |
| 55      | 56       | 1        | 0 | 0 | 0 | 0 |   |   |   |   |   |   |   |   |   |

|     |     |   |   |   |   |   |
|-----|-----|---|---|---|---|---|
| 55  | 57  | 1 | 0 | 0 | 0 | 0 |
| 55  | 58  | 1 | 0 | 0 | 0 | 0 |
| 58  | 59  | 1 | 0 | 0 | 0 | 0 |
| 58  | 60  | 1 | 0 | 0 | 0 | 0 |
| 58  | 61  | 1 | 0 | 0 | 0 | 0 |
| 61  | 74  | 1 | 0 | 0 | 0 | 0 |
| 62  | 63  | 1 | 0 | 0 | 0 | 0 |
| 62  | 64  | 1 | 0 | 0 | 0 | 0 |
| 62  | 65  | 1 | 0 | 0 | 0 | 0 |
| 62  | 89  | 1 | 0 | 0 | 0 | 0 |
| 65  | 66  | 1 | 0 | 0 | 0 | 0 |
| 66  | 67  | 1 | 0 | 0 | 0 | 0 |
| 66  | 73  | 2 | 0 | 0 | 0 | 0 |
| 67  | 68  | 1 | 0 | 0 | 0 | 0 |
| 67  | 69  | 1 | 0 | 0 | 0 | 0 |
| 67  | 70  | 1 | 0 | 0 | 0 | 0 |
| 70  | 71  | 1 | 0 | 0 | 0 | 0 |
| 70  | 72  | 1 | 0 | 0 | 0 | 0 |
| 70  | 106 | 1 | 0 | 0 | 0 | 0 |
| 74  | 75  | 1 | 0 | 0 | 0 | 0 |
| 74  | 76  | 1 | 0 | 0 | 0 | 0 |
| 74  | 77  | 1 | 0 | 0 | 0 | 0 |
| 77  | 78  | 1 | 0 | 0 | 0 | 0 |
| 77  | 79  | 1 | 0 | 0 | 0 | 0 |
| 77  | 80  | 1 | 0 | 0 | 0 | 0 |
| 80  | 81  | 1 | 0 | 0 | 0 | 0 |
| 80  | 88  | 2 | 0 | 0 | 0 | 0 |
| 81  | 82  | 1 | 0 | 0 | 0 | 0 |
| 82  | 83  | 1 | 0 | 0 | 0 | 0 |
| 82  | 84  | 1 | 0 | 0 | 0 | 0 |
| 82  | 85  | 1 | 0 | 0 | 0 | 0 |
| 85  | 86  | 1 | 0 | 0 | 0 | 0 |
| 85  | 87  | 1 | 0 | 0 | 0 | 0 |
| 85  | 89  | 1 | 0 | 0 | 0 | 0 |
| 89  | 90  | 1 | 0 | 0 | 0 | 0 |
| 89  | 91  | 1 | 0 | 0 | 0 | 0 |
| 92  | 93  | 1 | 0 | 0 | 0 | 0 |
| 92  | 94  | 1 | 0 | 0 | 0 | 0 |
| 94  | 95  | 1 | 0 | 0 | 0 | 0 |
| 94  | 96  | 1 | 0 | 0 | 0 | 0 |
| 94  | 97  | 1 | 0 | 0 | 0 | 0 |
| 97  | 98  | 1 | 0 | 0 | 0 | 0 |
| 97  | 99  | 1 | 0 | 0 | 0 | 0 |
| 97  | 100 | 1 | 0 | 0 | 0 | 0 |
| 100 | 101 | 1 | 0 | 0 | 0 | 0 |
| 100 | 102 | 1 | 0 | 0 | 0 | 0 |
| 100 | 103 | 1 | 0 | 0 | 0 | 0 |
| 103 | 104 | 1 | 0 | 0 | 0 | 0 |
| 103 | 105 | 1 | 0 | 0 | 0 | 0 |
| 103 | 106 | 1 | 0 | 0 | 0 | 0 |
| 106 | 119 | 1 | 0 | 0 | 0 | 0 |
| 107 | 108 | 1 | 0 | 0 | 0 | 0 |
| 107 | 109 | 1 | 0 | 0 | 0 | 0 |
| 107 | 110 | 1 | 0 | 0 | 0 | 0 |
| 107 | 134 | 1 | 0 | 0 | 0 | 0 |
| 110 | 111 | 1 | 0 | 0 | 0 | 0 |
| 111 | 112 | 1 | 0 | 0 | 0 | 0 |
| 111 | 118 | 2 | 0 | 0 | 0 | 0 |
| 112 | 113 | 1 | 0 | 0 | 0 | 0 |
| 112 | 114 | 1 | 0 | 0 | 0 | 0 |
| 112 | 115 | 1 | 0 | 0 | 0 | 0 |
| 115 | 116 | 1 | 0 | 0 | 0 | 0 |
| 115 | 117 | 1 | 0 | 0 | 0 | 0 |
| 115 | 151 | 1 | 0 | 0 | 0 | 0 |
| 119 | 120 | 1 | 0 | 0 | 0 | 0 |
| 119 | 121 | 1 | 0 | 0 | 0 | 0 |
| 119 | 122 | 1 | 0 | 0 | 0 | 0 |
| 122 | 123 | 1 | 0 | 0 | 0 | 0 |
| 122 | 124 | 1 | 0 | 0 | 0 | 0 |
| 122 | 125 | 1 | 0 | 0 | 0 | 0 |
| 125 | 126 | 1 | 0 | 0 | 0 | 0 |
| 125 | 133 | 2 | 0 | 0 | 0 | 0 |
| 126 | 127 | 1 | 0 | 0 | 0 | 0 |
| 127 | 128 | 1 | 0 | 0 | 0 | 0 |
| 127 | 129 | 1 | 0 | 0 | 0 | 0 |
| 127 | 130 | 1 | 0 | 0 | 0 | 0 |
| 130 | 131 | 1 | 0 | 0 | 0 | 0 |
| 130 | 132 | 1 | 0 | 0 | 0 | 0 |
| 130 | 134 | 1 | 0 | 0 | 0 | 0 |
| 134 | 135 | 1 | 0 | 0 | 0 | 0 |
| 134 | 136 | 1 | 0 | 0 | 0 | 0 |



|        |   |   |   |   |   |
|--------|---|---|---|---|---|
| 137138 | 1 | 0 | 0 | 0 | 0 |
| 137139 | 1 | 0 | 0 | 0 | 0 |
| 139140 | 1 | 0 | 0 | 0 | 0 |
| 139141 | 1 | 0 | 0 | 0 | 0 |
| 139142 | 1 | 0 | 0 | 0 | 0 |
| 142143 | 1 | 0 | 0 | 0 | 0 |
| 142144 | 1 | 0 | 0 | 0 | 0 |
| 142145 | 1 | 0 | 0 | 0 | 0 |
| 145146 | 1 | 0 | 0 | 0 | 0 |
| 145147 | 1 | 0 | 0 | 0 | 0 |
| 145148 | 1 | 0 | 0 | 0 | 0 |
| 148149 | 1 | 0 | 0 | 0 | 0 |
| 148150 | 1 | 0 | 0 | 0 | 0 |
| 148151 | 1 | 0 | 0 | 0 | 0 |
| 151164 | 1 | 0 | 0 | 0 | 0 |
| 152153 | 1 | 0 | 0 | 0 | 0 |
| 152154 | 1 | 0 | 0 | 0 | 0 |
| 152155 | 1 | 0 | 0 | 0 | 0 |
| 152179 | 1 | 0 | 0 | 0 | 0 |
| 155156 | 1 | 0 | 0 | 0 | 0 |
| 156157 | 1 | 0 | 0 | 0 | 0 |
| 156163 | 2 | 0 | 0 | 0 | 0 |
| 157158 | 1 | 0 | 0 | 0 | 0 |
| 157159 | 1 | 0 | 0 | 0 | 0 |
| 157160 | 1 | 0 | 0 | 0 | 0 |
| 160161 | 1 | 0 | 0 | 0 | 0 |
| 160162 | 1 | 0 | 0 | 0 | 0 |
| 160196 | 1 | 0 | 0 | 0 | 0 |
| 164165 | 1 | 0 | 0 | 0 | 0 |
| 164166 | 1 | 0 | 0 | 0 | 0 |
| 164167 | 1 | 0 | 0 | 0 | 0 |
| 167168 | 1 | 0 | 0 | 0 | 0 |
| 167169 | 1 | 0 | 0 | 0 | 0 |
| 167170 | 1 | 0 | 0 | 0 | 0 |
| 170171 | 1 | 0 | 0 | 0 | 0 |
| 170178 | 2 | 0 | 0 | 0 | 0 |
| 171172 | 1 | 0 | 0 | 0 | 0 |
| 172173 | 1 | 0 | 0 | 0 | 0 |
| 172174 | 1 | 0 | 0 | 0 | 0 |
| 172175 | 1 | 0 | 0 | 0 | 0 |
| 175176 | 1 | 0 | 0 | 0 | 0 |
| 175177 | 1 | 0 | 0 | 0 | 0 |
| 175179 | 1 | 0 | 0 | 0 | 0 |
| 179180 | 1 | 0 | 0 | 0 | 0 |
| 179181 | 1 | 0 | 0 | 0 | 0 |
| 182183 | 1 | 0 | 0 | 0 | 0 |
| 182184 | 1 | 0 | 0 | 0 | 0 |
| 184185 | 1 | 0 | 0 | 0 | 0 |
| 184186 | 1 | 0 | 0 | 0 | 0 |
| 184187 | 1 | 0 | 0 | 0 | 0 |
| 187188 | 1 | 0 | 0 | 0 | 0 |
| 187189 | 1 | 0 | 0 | 0 | 0 |
| 187190 | 1 | 0 | 0 | 0 | 0 |
| 190191 | 1 | 0 | 0 | 0 | 0 |
| 190192 | 1 | 0 | 0 | 0 | 0 |
| 190193 | 1 | 0 | 0 | 0 | 0 |
| 193194 | 1 | 0 | 0 | 0 | 0 |
| 193195 | 1 | 0 | 0 | 0 | 0 |
| 193196 | 1 | 0 | 0 | 0 | 0 |
| 196210 | 1 | 0 | 0 | 0 | 0 |
| 197198 | 1 | 0 | 0 | 0 | 0 |
| 197199 | 1 | 0 | 0 | 0 | 0 |
| 197200 | 1 | 0 | 0 | 0 | 0 |
| 197225 | 1 | 0 | 0 | 0 | 0 |
| 200201 | 1 | 0 | 0 | 0 | 0 |
| 201202 | 1 | 0 | 0 | 0 | 0 |
| 201209 | 2 | 0 | 0 | 0 | 0 |
| 202203 | 1 | 0 | 0 | 0 | 0 |
| 202204 | 1 | 0 | 0 | 0 | 0 |
| 202205 | 1 | 0 | 0 | 0 | 0 |
| 205206 | 1 | 0 | 0 | 0 | 0 |
| 205207 | 1 | 0 | 0 | 0 | 0 |
| 205208 | 1 | 0 | 0 | 0 | 0 |
| 210211 | 1 | 0 | 0 | 0 | 0 |
| 210212 | 1 | 0 | 0 | 0 | 0 |
| 210213 | 1 | 0 | 0 | 0 | 0 |
| 213214 | 1 | 0 | 0 | 0 | 0 |
| 213215 | 1 | 0 | 0 | 0 | 0 |
| 213216 | 1 | 0 | 0 | 0 | 0 |
| 216217 | 1 | 0 | 0 | 0 | 0 |
| 216224 | 2 | 0 | 0 | 0 | 0 |

217218 1 0 0 0 0  
218219 1 0 0 0 0  
218220 1 0 0 0 0  
218221 1 0 0 0 0  
221222 1 0 0 0 0  
221223 1 0 0 0 0  
221225 1 0 0 0 0  
225226 1 0 0 0 0  
225227 1 0 0 0 0

M END  
> <NAME>  
C28\_1

\$\$\$  
C32\_1  
MOE2012 3D

242241 0 0 1 0 0 0 0 0999 V2000  
16.6850 23.7080 -29.1770 O 0 0 0 0 0 0 0 0 0 0 0 0 0 0 0 0  
15.8030 23.9270 -29.5240 H 0 0 0 0 0 0 0 0 0 0 0 0 0 0 0 0  
16.5140 22.6550 -28.2380 C 0 0 0 0 0 0 0 0 0 0 0 0 0 0 0 0  
15.8390 22.9990 -27.4480 H 0 0 0 0 0 0 0 0 0 0 0 0 0 0 0 0  
16.0600 21.8010 -28.7500 H 0 0 0 0 0 0 0 0 0 0 0 0 0 0 0 0  
17.8750 22.2850 -27.6660 C 0 0 0 0 0 0 0 0 0 0 0 0 0 0 0 0  
18.5470 21.9970 -28.4850 H 0 0 0 0 0 0 0 0 0 0 0 0 0 0 0 0  
18.3290 23.1710 -27.2050 H 0 0 0 0 0 0 0 0 0 0 0 0 0 0 0 0  
17.7700 21.1530 -26.6460 C 0 0 0 0 0 0 0 0 0 0 0 0 0 0 0 0  
17.1010 21.4550 -25.8310 H 0 0 0 0 0 0 0 0 0 0 0 0 0 0 0 0  
17.3250 20.2710 -27.1210 H 0 0 0 0 0 0 0 0 0 0 0 0 0 0 0 0  
19.1430 20.7910 -26.0750 C 0 0 0 0 0 0 0 0 0 0 0 0 0 0 0 0  
19.8110 20.4930 -26.8930 H 0 0 0 0 0 0 0 0 0 0 0 0 0 0 0 0  
19.5870 21.6760 -25.6010 H 0 0 0 0 0 0 0 0 0 0 0 0 0 0 0 0  
19.0360 19.6560 -25.0540 C 0 0 0 0 0 0 0 0 0 0 0 0 0 0 0 0  
18.3690 19.9630 -24.2390 H 0 0 0 0 0 0 0 0 0 0 0 0 0 0 0 0  
18.6030 18.7710 -25.5340 H 0 0 0 0 0 0 0 0 0 0 0 0 0 0 0 0  
20.3640 19.3460 -24.5220 N 0 0 0 3 0 0 0 0 0 0 0 0 0 0 0 0  
20.9850 19.0900 -25.2890 H 0 0 0 0 0 0 0 0 0 0 0 0 0 0 0 0  
26.1090 14.3710 -18.5370 C 0 0 0 0 0 0 0 0 0 0 0 0 0 0 0 0  
26.4200 15.3180 -18.0810 H 0 0 0 0 0 0 0 0 0 0 0 0 0 0 0 0  
26.7580 14.1440 -19.3920 H 0 0 0 0 0 0 0 0 0 0 0 0 0 0 0 0  
26.2120 13.3190 -17.5680 O 0 0 0 0 0 0 0 0 0 0 0 0 0 0 0 0  
27.4720 13.1190 -17.0810 C 0 0 0 0 0 0 0 0 0 0 0 0 0 0 0 0  
27.4490 11.9900 -16.0790 C 0 0 0 0 0 0 0 0 0 0 0 0 0 0 0 0  
26.6800 12.2160 -15.3310 H 0 0 0 0 0 0 0 0 0 0 0 0 0 0 0 0  
27.1750 11.0760 -16.6160 H 0 0 0 0 0 0 0 0 0 0 0 0 0 0 0 0  
28.8080 11.8330 -15.3890 C 0 0 0 0 0 0 0 0 0 0 0 0 0 0 0 0  
29.5780 11.5620 -16.1230 H 0 0 0 0 0 0 0 0 0 0 0 0 0 0 0 0  
29.0920 12.8220 -15.0050 H 0 0 0 0 0 0 0 0 0 0 0 0 0 0 0 0  
28.4610 13.7570 -17.4140 O 0 0 0 0 0 0 0 0 0 0 0 0 0 0 0 0  
20.2990 18.2540 -23.5490 C 0 0 0 0 0 0 0 0 0 0 0 0 0 0 0 0  
19.6230 18.5230 -22.7270 H 0 0 0 0 0 0 0 0 0 0 0 0 0 0 0 0  
19.9030 17.3470 -24.0220 H 0 0 0 0 0 0 0 0 0 0 0 0 0 0 0 0  
21.6920 17.9780 -22.9890 C 0 0 0 0 0 0 0 0 0 0 0 0 0 0 0 0  
22.3730 17.6830 -23.7960 H 0 0 0 0 0 0 0 0 0 0 0 0 0 0 0 0  
22.0840 18.8770 -22.4990 H 0 0 0 0 0 0 0 0 0 0 0 0 0 0 0 0  
21.6570 16.8640 -21.9740 C 0 0 0 0 0 0 0 0 0 0 0 0 0 0 0 0  
22.9090 16.6770 -21.4660 O 0 0 0 0 0 0 0 0 0 0 0 0 0 0 0 0  
23.0050 15.6330 -20.4870 C 0 0 0 0 0 0 0 0 0 0 0 0 0 0 0 0  
22.3540 15.8690 -19.6370 H 0 0 0 0 0 0 0 0 0 0 0 0 0 0 0 0  
22.6940 14.6830 -20.9360 H 0 0 0 0 0 0 0 0 0 0 0 0 0 0 0 0  
24.4570 15.5490 -20.0310 C 0 0 0 0 0 0 0 0 0 0 0 0 0 0 0 0  
25.1000 15.3670 -20.9010 H 0 0 0 0 0 0 0 0 0 0 0 0 0 0 0 0  
24.7670 16.5210 -19.6280 H 0 0 0 0 0 0 0 0 0 0 0 0 0 0 0 0  
20.6650 16.2230 -21.6580 O 0 0 0 0 0 0 0 0 0 0 0 0 0 0 0 0  
24.6560 14.4550 -18.9890 C 0 0 0 0 0 0 0 0 0 0 0 0 0 0 0 0  
24.3440 13.4840 -19.3920 H 0 0 0 0 0 0 0 0 0 0 0 0 0 0 0 0  
24.0150 14.6380 -18.1170 H 0 0 0 0 0 0 0 0 0 0 0 0 0 0 0 0  
29.5570 4.6890 -18.4220 O 0 0 0 0 0 0 0 0 0 0 0 0 0 0 0 0  
29.1670 3.8120 -18.5820 H 0 0 0 0 0 0 0 0 0 0 0 0 0 0 0 0  
28.8240 5.2950 -17.3640 C 0 0 0 0 0 0 0 0 0 0 0 0 0 0 0 0  
27.7720 5.3500 -17.6600 H 0 0 0 0 0 0 0 0 0 0 0 0 0 0 0 0  
28.9110 4.6620 -16.4750 H 0 0 0 0 0 0 0 0 0 0 0 0 0 0 0 0  
29.3850 6.6870 -17.0970 C 0 0 0 0 0 0 0 0 0 0 0 0 0 0 0 0  
30.4510 6.6080 -16.8460 H 0 0 0 0 0 0 0 0 0 0 0 0 0 0 0 0  
29.3370 7.2790 -18.0190 H 0 0 0 0 0 0 0 0 0 0 0 0 0 0 0 0  
28.6280 7.3950 -15.9730 C 0 0 0 0 0 0 0 0 0 0 0 0 0 0 0 0  
27.5640 7.4540 -16.2320 H 0 0 0 0 0 0 0 0 0 0 0 0 0 0 0 0  
28.7050 6.8050 -15.0510 H 0 0 0 0 0 0 0 0 0 0 0 0 0 0 0 0  
29.1720 8.8080 -15.7230 C 0 0 0 0 0 0 0 0 0 0 0 0 0 0 0 0  
30.2300 8.7420 -15.4500 H 0 0 0 0 0 0 0 0 0 0 0 0 0 0 0 0  
29.1120 9.3770 -16.6580 H 0 0 0 0 0 0 0 0 0 0 0 0 0 0 0 0





|         |          |          |   |   |   |   |   |   |   |   |   |   |   |   |   |   |   |
|---------|----------|----------|---|---|---|---|---|---|---|---|---|---|---|---|---|---|---|
| 58.3460 | -10.3140 | -5.4270  | H | 0 | 0 | 0 | 0 | 0 | 0 | 0 | 0 | 0 | 0 | 0 | 0 | 0 | 0 |
| 58.3120 | -10.3010 | -7.1810  | H | 0 | 0 | 0 | 0 | 0 | 0 | 0 | 0 | 0 | 0 | 0 | 0 | 0 | 0 |
| 59.6920 | -11.7160 | -6.3830  | C | 0 | 0 | 0 | 0 | 0 | 0 | 0 | 0 | 0 | 0 | 0 | 0 | 0 | 0 |
| 60.3840 | -11.7730 | -7.2310  | H | 0 | 0 | 0 | 0 | 0 | 0 | 0 | 0 | 0 | 0 | 0 | 0 | 0 | 0 |
| 60.2760 | -11.9270 | -5.4820  | H | 0 | 0 | 0 | 0 | 0 | 0 | 0 | 0 | 0 | 0 | 0 | 0 | 0 | 0 |
| 58.6590 | -12.8010 | -6.5200  | C | 0 | 0 | 0 | 0 | 0 | 0 | 0 | 0 | 0 | 0 | 0 | 0 | 0 | 0 |
| 58.2800 | -12.9240 | -7.8210  | O | 0 | 0 | 0 | 0 | 0 | 0 | 0 | 0 | 0 | 0 | 0 | 0 | 0 | 0 |
| 57.2500 | -13.8920 | -8.0540  | C | 0 | 0 | 0 | 0 | 0 | 0 | 0 | 0 | 0 | 0 | 0 | 0 | 0 | 0 |
| 57.6210 | -14.8890 | -7.7900  | H | 0 | 0 | 0 | 0 | 0 | 0 | 0 | 0 | 0 | 0 | 0 | 0 | 0 | 0 |
| 56.3720 | -13.6510 | -7.4430  | H | 0 | 0 | 0 | 0 | 0 | 0 | 0 | 0 | 0 | 0 | 0 | 0 | 0 | 0 |
| 56.8910 | -13.8350 | -9.5330  | C | 0 | 0 | 0 | 0 | 0 | 0 | 0 | 0 | 0 | 0 | 0 | 0 | 0 | 0 |
| 56.5840 | -12.8140 | -9.7920  | H | 0 | 0 | 0 | 0 | 0 | 0 | 0 | 0 | 0 | 0 | 0 | 0 | 0 | 0 |
| 57.7870 | -14.0400 | -10.1330 | H | 0 | 0 | 0 | 0 | 0 | 0 | 0 | 0 | 0 | 0 | 0 | 0 | 0 | 0 |
| 58.2060 | -13.4410 | -5.5810  | O | 0 | 0 | 0 | 0 | 0 | 0 | 0 | 0 | 0 | 0 | 0 | 0 | 0 | 0 |
| 55.7850 | -14.8230 | -9.8800  | C | 0 | 0 | 0 | 0 | 0 | 0 | 0 | 0 | 0 | 0 | 0 | 0 | 0 | 0 |
| 54.8910 | -14.6220 | -9.2760  | H | 0 | 0 | 0 | 0 | 0 | 0 | 0 | 0 | 0 | 0 | 0 | 0 | 0 | 0 |
| 56.0940 | -15.8450 | -9.6290  | H | 0 | 0 | 0 | 0 | 0 | 0 | 0 | 0 | 0 | 0 | 0 | 0 | 0 | 0 |
| 1       | 2        | 1        | 0 | 0 | 0 | 0 |   |   |   |   |   |   |   |   |   |   |   |
| 1       | 3        | 1        | 0 | 0 | 0 | 0 |   |   |   |   |   |   |   |   |   |   |   |
| 3       | 4        | 1        | 0 | 0 | 0 | 0 |   |   |   |   |   |   |   |   |   |   |   |
| 3       | 5        | 1        | 0 | 0 | 0 | 0 |   |   |   |   |   |   |   |   |   |   |   |
| 3       | 6        | 1        | 0 | 0 | 0 | 0 |   |   |   |   |   |   |   |   |   |   |   |
| 6       | 7        | 1        | 0 | 0 | 0 | 0 |   |   |   |   |   |   |   |   |   |   |   |
| 6       | 8        | 1        | 0 | 0 | 0 | 0 |   |   |   |   |   |   |   |   |   |   |   |
| 6       | 9        | 1        | 0 | 0 | 0 | 0 |   |   |   |   |   |   |   |   |   |   |   |
| 9       | 10       | 1        | 0 | 0 | 0 | 0 |   |   |   |   |   |   |   |   |   |   |   |
| 9       | 11       | 1        | 0 | 0 | 0 | 0 |   |   |   |   |   |   |   |   |   |   |   |
| 9       | 12       | 1        | 0 | 0 | 0 | 0 |   |   |   |   |   |   |   |   |   |   |   |
| 12      | 13       | 1        | 0 | 0 | 0 | 0 |   |   |   |   |   |   |   |   |   |   |   |
| 12      | 14       | 1        | 0 | 0 | 0 | 0 |   |   |   |   |   |   |   |   |   |   |   |
| 12      | 15       | 1        | 0 | 0 | 0 | 0 |   |   |   |   |   |   |   |   |   |   |   |
| 15      | 16       | 1        | 0 | 0 | 0 | 0 |   |   |   |   |   |   |   |   |   |   |   |
| 15      | 17       | 1        | 0 | 0 | 0 | 0 |   |   |   |   |   |   |   |   |   |   |   |
| 15      | 18       | 1        | 0 | 0 | 0 | 0 |   |   |   |   |   |   |   |   |   |   |   |
| 18      | 19       | 1        | 0 | 0 | 0 | 0 |   |   |   |   |   |   |   |   |   |   |   |
| 18      | 32       | 1        | 0 | 0 | 0 | 0 |   |   |   |   |   |   |   |   |   |   |   |
| 20      | 21       | 1        | 0 | 0 | 0 | 0 |   |   |   |   |   |   |   |   |   |   |   |
| 20      | 22       | 1        | 0 | 0 | 0 | 0 |   |   |   |   |   |   |   |   |   |   |   |
| 20      | 23       | 1        | 0 | 0 | 0 | 0 |   |   |   |   |   |   |   |   |   |   |   |
| 20      | 47       | 1        | 0 | 0 | 0 | 0 |   |   |   |   |   |   |   |   |   |   |   |
| 23      | 24       | 1        | 0 | 0 | 0 | 0 |   |   |   |   |   |   |   |   |   |   |   |
| 24      | 25       | 1        | 0 | 0 | 0 | 0 |   |   |   |   |   |   |   |   |   |   |   |
| 24      | 31       | 2        | 0 | 0 | 0 | 0 |   |   |   |   |   |   |   |   |   |   |   |
| 25      | 26       | 1        | 0 | 0 | 0 | 0 |   |   |   |   |   |   |   |   |   |   |   |
| 25      | 27       | 1        | 0 | 0 | 0 | 0 |   |   |   |   |   |   |   |   |   |   |   |
| 25      | 28       | 1        | 0 | 0 | 0 | 0 |   |   |   |   |   |   |   |   |   |   |   |
| 28      | 29       | 1        | 0 | 0 | 0 | 0 |   |   |   |   |   |   |   |   |   |   |   |
| 28      | 30       | 1        | 0 | 0 | 0 | 0 |   |   |   |   |   |   |   |   |   |   |   |
| 28      | 67       | 1        | 0 | 0 | 0 | 0 |   |   |   |   |   |   |   |   |   |   |   |
| 32      | 33       | 1        | 0 | 0 | 0 | 0 |   |   |   |   |   |   |   |   |   |   |   |
| 32      | 34       | 1        | 0 | 0 | 0 | 0 |   |   |   |   |   |   |   |   |   |   |   |
| 32      | 35       | 1        | 0 | 0 | 0 | 0 |   |   |   |   |   |   |   |   |   |   |   |
| 35      | 36       | 1        | 0 | 0 | 0 | 0 |   |   |   |   |   |   |   |   |   |   |   |
| 35      | 37       | 1        | 0 | 0 | 0 | 0 |   |   |   |   |   |   |   |   |   |   |   |
| 35      | 38       | 1        | 0 | 0 | 0 | 0 |   |   |   |   |   |   |   |   |   |   |   |
| 38      | 39       | 1        | 0 | 0 | 0 | 0 |   |   |   |   |   |   |   |   |   |   |   |
| 38      | 46       | 2        | 0 | 0 | 0 | 0 |   |   |   |   |   |   |   |   |   |   |   |
| 39      | 40       | 1        | 0 | 0 | 0 | 0 |   |   |   |   |   |   |   |   |   |   |   |
| 40      | 41       | 1        | 0 | 0 | 0 | 0 |   |   |   |   |   |   |   |   |   |   |   |
| 40      | 42       | 1        | 0 | 0 | 0 | 0 |   |   |   |   |   |   |   |   |   |   |   |
| 40      | 43       | 1        | 0 | 0 | 0 | 0 |   |   |   |   |   |   |   |   |   |   |   |
| 43      | 44       | 1        | 0 | 0 | 0 | 0 |   |   |   |   |   |   |   |   |   |   |   |
| 43      | 45       | 1        | 0 | 0 | 0 | 0 |   |   |   |   |   |   |   |   |   |   |   |
| 43      | 47       | 1        | 0 | 0 | 0 | 0 |   |   |   |   |   |   |   |   |   |   |   |
| 47      | 48       | 1        | 0 | 0 | 0 | 0 |   |   |   |   |   |   |   |   |   |   |   |
| 47      | 49       | 1        | 0 | 0 | 0 | 0 |   |   |   |   |   |   |   |   |   |   |   |
| 50      | 51       | 1        | 0 | 0 | 0 | 0 |   |   |   |   |   |   |   |   |   |   |   |
| 50      | 52       | 1        | 0 | 0 | 0 | 0 |   |   |   |   |   |   |   |   |   |   |   |
| 52      | 53       | 1        | 0 | 0 | 0 | 0 |   |   |   |   |   |   |   |   |   |   |   |
| 52      | 54       | 1        | 0 | 0 | 0 | 0 |   |   |   |   |   |   |   |   |   |   |   |
| 52      | 55       | 1        | 0 | 0 | 0 | 0 |   |   |   |   |   |   |   |   |   |   |   |
| 55      | 56       | 1        | 0 | 0 | 0 | 0 |   |   |   |   |   |   |   |   |   |   |   |
| 55      | 57       | 1        | 0 | 0 | 0 | 0 |   |   |   |   |   |   |   |   |   |   |   |
| 55      | 58       | 1        | 0 | 0 | 0 | 0 |   |   |   |   |   |   |   |   |   |   |   |
| 58      | 59       | 1        | 0 | 0 | 0 | 0 |   |   |   |   |   |   |   |   |   |   |   |
| 58      | 60       | 1        | 0 | 0 | 0 | 0 |   |   |   |   |   |   |   |   |   |   |   |
| 58      | 61       | 1        | 0 | 0 | 0 | 0 |   |   |   |   |   |   |   |   |   |   |   |
| 61      | 62       | 1        | 0 | 0 | 0 | 0 |   |   |   |   |   |   |   |   |   |   |   |
| 61      | 63       | 1        | 0 | 0 | 0 | 0 |   |   |   |   |   |   |   |   |   |   |   |
| 61      | 64       | 1        | 0 | 0 | 0 | 0 |   |   |   |   |   |   |   |   |   |   |   |
| 64      | 65       | 1        | 0 | 0 | 0 | 0 |   |   |   |   |   |   |   |   |   |   |   |

|     |     |   |   |   |   |   |
|-----|-----|---|---|---|---|---|
| 64  | 66  | 1 | 0 | 0 | 0 | 0 |
| 64  | 67  | 1 | 0 | 0 | 0 | 0 |
| 67  | 80  | 1 | 0 | 0 | 0 | 0 |
| 68  | 69  | 1 | 0 | 0 | 0 | 0 |
| 68  | 70  | 1 | 0 | 0 | 0 | 0 |
| 68  | 71  | 1 | 0 | 0 | 0 | 0 |
| 68  | 95  | 1 | 0 | 0 | 0 | 0 |
| 71  | 72  | 1 | 0 | 0 | 0 | 0 |
| 72  | 73  | 1 | 0 | 0 | 0 | 0 |
| 72  | 79  | 2 | 0 | 0 | 0 | 0 |
| 73  | 74  | 1 | 0 | 0 | 0 | 0 |
| 73  | 75  | 1 | 0 | 0 | 0 | 0 |
| 73  | 76  | 1 | 0 | 0 | 0 | 0 |
| 76  | 77  | 1 | 0 | 0 | 0 | 0 |
| 76  | 78  | 1 | 0 | 0 | 0 | 0 |
| 76  | 115 | 1 | 0 | 0 | 0 | 0 |
| 80  | 81  | 1 | 0 | 0 | 0 | 0 |
| 80  | 82  | 1 | 0 | 0 | 0 | 0 |
| 80  | 83  | 1 | 0 | 0 | 0 | 0 |
| 83  | 84  | 1 | 0 | 0 | 0 | 0 |
| 83  | 85  | 1 | 0 | 0 | 0 | 0 |
| 83  | 86  | 1 | 0 | 0 | 0 | 0 |
| 86  | 87  | 1 | 0 | 0 | 0 | 0 |
| 86  | 94  | 2 | 0 | 0 | 0 | 0 |
| 87  | 88  | 1 | 0 | 0 | 0 | 0 |
| 88  | 89  | 1 | 0 | 0 | 0 | 0 |
| 88  | 90  | 1 | 0 | 0 | 0 | 0 |
| 88  | 91  | 1 | 0 | 0 | 0 | 0 |
| 91  | 92  | 1 | 0 | 0 | 0 | 0 |
| 91  | 93  | 1 | 0 | 0 | 0 | 0 |
| 91  | 95  | 1 | 0 | 0 | 0 | 0 |
| 95  | 96  | 1 | 0 | 0 | 0 | 0 |
| 95  | 97  | 1 | 0 | 0 | 0 | 0 |
| 98  | 99  | 1 | 0 | 0 | 0 | 0 |
| 98  | 100 | 1 | 0 | 0 | 0 | 0 |
| 100 | 101 | 1 | 0 | 0 | 0 | 0 |
| 100 | 102 | 1 | 0 | 0 | 0 | 0 |
| 100 | 103 | 1 | 0 | 0 | 0 | 0 |
| 103 | 104 | 1 | 0 | 0 | 0 | 0 |
| 103 | 105 | 1 | 0 | 0 | 0 | 0 |
| 103 | 106 | 1 | 0 | 0 | 0 | 0 |
| 106 | 107 | 1 | 0 | 0 | 0 | 0 |
| 106 | 108 | 1 | 0 | 0 | 0 | 0 |
| 106 | 109 | 1 | 0 | 0 | 0 | 0 |
| 109 | 110 | 1 | 0 | 0 | 0 | 0 |
| 109 | 111 | 1 | 0 | 0 | 0 | 0 |
| 109 | 112 | 1 | 0 | 0 | 0 | 0 |
| 112 | 113 | 1 | 0 | 0 | 0 | 0 |
| 112 | 114 | 1 | 0 | 0 | 0 | 0 |
| 112 | 115 | 1 | 0 | 0 | 0 | 0 |
| 115 | 128 | 1 | 0 | 0 | 0 | 0 |
| 116 | 117 | 1 | 0 | 0 | 0 | 0 |
| 116 | 118 | 1 | 0 | 0 | 0 | 0 |
| 116 | 119 | 1 | 0 | 0 | 0 | 0 |
| 116 | 143 | 1 | 0 | 0 | 0 | 0 |
| 119 | 120 | 1 | 0 | 0 | 0 | 0 |
| 120 | 121 | 1 | 0 | 0 | 0 | 0 |
| 120 | 127 | 2 | 0 | 0 | 0 | 0 |
| 121 | 122 | 1 | 0 | 0 | 0 | 0 |
| 121 | 123 | 1 | 0 | 0 | 0 | 0 |
| 121 | 124 | 1 | 0 | 0 | 0 | 0 |
| 124 | 125 | 1 | 0 | 0 | 0 | 0 |
| 124 | 126 | 1 | 0 | 0 | 0 | 0 |
| 124 | 163 | 1 | 0 | 0 | 0 | 0 |
| 128 | 129 | 1 | 0 | 0 | 0 | 0 |
| 128 | 130 | 1 | 0 | 0 | 0 | 0 |
| 128 | 131 | 1 | 0 | 0 | 0 | 0 |
| 131 | 132 | 1 | 0 | 0 | 0 | 0 |
| 131 | 133 | 1 | 0 | 0 | 0 | 0 |
| 131 | 134 | 1 | 0 | 0 | 0 | 0 |
| 134 | 135 | 1 | 0 | 0 | 0 | 0 |
| 134 | 142 | 2 | 0 | 0 | 0 | 0 |
| 135 | 136 | 1 | 0 | 0 | 0 | 0 |
| 136 | 137 | 1 | 0 | 0 | 0 | 0 |
| 136 | 138 | 1 | 0 | 0 | 0 | 0 |
| 136 | 139 | 1 | 0 | 0 | 0 | 0 |
| 139 | 140 | 1 | 0 | 0 | 0 | 0 |
| 139 | 141 | 1 | 0 | 0 | 0 | 0 |
| 139 | 143 | 1 | 0 | 0 | 0 | 0 |
| 143 | 144 | 1 | 0 | 0 | 0 | 0 |
| 143 | 145 | 1 | 0 | 0 | 0 | 0 |

|        |   |   |   |   |   |
|--------|---|---|---|---|---|
| 146147 | 1 | 0 | 0 | 0 | 0 |
| 146148 | 1 | 0 | 0 | 0 | 0 |
| 148149 | 1 | 0 | 0 | 0 | 0 |
| 148150 | 1 | 0 | 0 | 0 | 0 |
| 148151 | 1 | 0 | 0 | 0 | 0 |
| 151152 | 1 | 0 | 0 | 0 | 0 |
| 151153 | 1 | 0 | 0 | 0 | 0 |
| 151154 | 1 | 0 | 0 | 0 | 0 |
| 154155 | 1 | 0 | 0 | 0 | 0 |
| 154156 | 1 | 0 | 0 | 0 | 0 |
| 154157 | 1 | 0 | 0 | 0 | 0 |
| 157158 | 1 | 0 | 0 | 0 | 0 |
| 157159 | 1 | 0 | 0 | 0 | 0 |
| 157160 | 1 | 0 | 0 | 0 | 0 |
| 160161 | 1 | 0 | 0 | 0 | 0 |
| 160162 | 1 | 0 | 0 | 0 | 0 |
| 160163 | 1 | 0 | 0 | 0 | 0 |
| 163176 | 1 | 0 | 0 | 0 | 0 |
| 164165 | 1 | 0 | 0 | 0 | 0 |
| 164166 | 1 | 0 | 0 | 0 | 0 |
| 164167 | 1 | 0 | 0 | 0 | 0 |
| 164191 | 1 | 0 | 0 | 0 | 0 |
| 167168 | 1 | 0 | 0 | 0 | 0 |
| 168169 | 1 | 0 | 0 | 0 | 0 |
| 168175 | 2 | 0 | 0 | 0 | 0 |
| 169170 | 1 | 0 | 0 | 0 | 0 |
| 169171 | 1 | 0 | 0 | 0 | 0 |
| 169172 | 1 | 0 | 0 | 0 | 0 |
| 172173 | 1 | 0 | 0 | 0 | 0 |
| 172174 | 1 | 0 | 0 | 0 | 0 |
| 172211 | 1 | 0 | 0 | 0 | 0 |
| 176177 | 1 | 0 | 0 | 0 | 0 |
| 176178 | 1 | 0 | 0 | 0 | 0 |
| 176179 | 1 | 0 | 0 | 0 | 0 |
| 179180 | 1 | 0 | 0 | 0 | 0 |
| 179181 | 1 | 0 | 0 | 0 | 0 |
| 179182 | 1 | 0 | 0 | 0 | 0 |
| 182183 | 1 | 0 | 0 | 0 | 0 |
| 182190 | 2 | 0 | 0 | 0 | 0 |
| 183184 | 1 | 0 | 0 | 0 | 0 |
| 184185 | 1 | 0 | 0 | 0 | 0 |
| 184186 | 1 | 0 | 0 | 0 | 0 |
| 184187 | 1 | 0 | 0 | 0 | 0 |
| 187188 | 1 | 0 | 0 | 0 | 0 |
| 187189 | 1 | 0 | 0 | 0 | 0 |
| 187191 | 1 | 0 | 0 | 0 | 0 |
| 191192 | 1 | 0 | 0 | 0 | 0 |
| 191193 | 1 | 0 | 0 | 0 | 0 |
| 194195 | 1 | 0 | 0 | 0 | 0 |
| 194196 | 1 | 0 | 0 | 0 | 0 |
| 196197 | 1 | 0 | 0 | 0 | 0 |
| 196198 | 1 | 0 | 0 | 0 | 0 |
| 196199 | 1 | 0 | 0 | 0 | 0 |
| 199200 | 1 | 0 | 0 | 0 | 0 |
| 199201 | 1 | 0 | 0 | 0 | 0 |
| 199202 | 1 | 0 | 0 | 0 | 0 |
| 202203 | 1 | 0 | 0 | 0 | 0 |
| 202204 | 1 | 0 | 0 | 0 | 0 |
| 202205 | 1 | 0 | 0 | 0 | 0 |
| 205206 | 1 | 0 | 0 | 0 | 0 |
| 205207 | 1 | 0 | 0 | 0 | 0 |
| 205208 | 1 | 0 | 0 | 0 | 0 |
| 208209 | 1 | 0 | 0 | 0 | 0 |
| 208210 | 1 | 0 | 0 | 0 | 0 |
| 208211 | 1 | 0 | 0 | 0 | 0 |
| 211225 | 1 | 0 | 0 | 0 | 0 |
| 212213 | 1 | 0 | 0 | 0 | 0 |
| 212214 | 1 | 0 | 0 | 0 | 0 |
| 212215 | 1 | 0 | 0 | 0 | 0 |
| 212240 | 1 | 0 | 0 | 0 | 0 |
| 215216 | 1 | 0 | 0 | 0 | 0 |
| 216217 | 1 | 0 | 0 | 0 | 0 |
| 216224 | 2 | 0 | 0 | 0 | 0 |
| 217218 | 1 | 0 | 0 | 0 | 0 |
| 217219 | 1 | 0 | 0 | 0 | 0 |
| 217220 | 1 | 0 | 0 | 0 | 0 |
| 220221 | 1 | 0 | 0 | 0 | 0 |
| 220222 | 1 | 0 | 0 | 0 | 0 |
| 220223 | 1 | 0 | 0 | 0 | 0 |
| 225226 | 1 | 0 | 0 | 0 | 0 |
| 225227 | 1 | 0 | 0 | 0 | 0 |

225228 1 0 0 0 0  
228229 1 0 0 0 0  
228230 1 0 0 0 0  
228231 1 0 0 0 0  
231232 1 0 0 0 0  
231239 2 0 0 0 0  
232233 1 0 0 0 0  
233234 1 0 0 0 0  
233235 1 0 0 0 0  
233236 1 0 0 0 0  
236237 1 0 0 0 0  
236238 1 0 0 0 0  
236240 1 0 0 0 0  
240241 1 0 0 0 0  
240242 1 0 0 0 0

M END  
> <NAME>  
C32\_1

\$\$\$  
C36\_1  
MOE2012 3D

257256 0 0 1 0 0 0 0 0999 V2000  
31.7940 17.3330 -13.9200 O 0 0 0 0 0 0 0 0 0 0 0 0 0 0 0  
31.8510 17.8900 -14.7140 H 0 0 0 0 0 0 0 0 0 0 0 0 0 0 0  
31.8750 18.2020 -12.7980 C 0 0 0 0 0 0 0 0 0 0 0 0 0 0 0  
32.8260 18.7420 -12.8450 H 0 0 0 0 0 0 0 0 0 0 0 0 0 0 0  
31.0530 18.9220 -12.8560 H 0 0 0 0 0 0 0 0 0 0 0 0 0 0 0  
31.7830 17.3770 -11.5200 C 0 0 0 0 0 0 0 0 0 0 0 0 0 0 0  
30.8430 16.8110 -11.5200 H 0 0 0 0 0 0 0 0 0 0 0 0 0 0 0  
32.5840 16.6270 -11.5140 H 0 0 0 0 0 0 0 0 0 0 0 0 0 0 0  
31.8720 18.2540 -10.2720 C 0 0 0 0 0 0 0 0 0 0 0 0 0 0 0  
32.8190 18.8090 -10.2810 H 0 0 0 0 0 0 0 0 0 0 0 0 0 0 0  
31.0640 18.9960 -10.2870 H 0 0 0 0 0 0 0 0 0 0 0 0 0 0 0  
31.7790 17.4220 -8.9900 C 0 0 0 0 0 0 0 0 0 0 0 0 0 0 0  
30.8300 16.8740 -8.9760 H 0 0 0 0 0 0 0 0 0 0 0 0 0 0 0  
32.5840 16.6770 -8.9770 H 0 0 0 0 0 0 0 0 0 0 0 0 0 0 0  
31.8800 18.3050 -7.7420 C 0 0 0 0 0 0 0 0 0 0 0 0 0 0 0  
32.8300 18.8540 -7.7620 H 0 0 0 0 0 0 0 0 0 0 0 0 0 0 0  
31.0750 19.0510 -7.7570 H 0 0 0 0 0 0 0 0 0 0 0 0 0 0 0  
31.7890 17.4740 -6.4580 C 0 0 0 0 0 0 0 0 0 0 0 0 0 0 0  
30.8320 16.9380 -6.4420 H 0 0 0 0 0 0 0 0 0 0 0 0 0 0 0  
32.5950 16.7320 -6.4530 H 0 0 0 0 0 0 0 0 0 0 0 0 0 0 0  
31.8890 18.3560 -5.2950 N 0 0 0 3 0 0 0 0 0 0 0 0 0 0 0  
32.7730 18.8640 -5.3210 H 0 0 0 0 0 0 0 0 0 0 0 0 0 0 0  
36.6020 12.8750 1.2300 C 0 0 0 0 0 0 0 0 0 0 0 0 0 0 0  
37.4100 13.6150 1.2010 H 0 0 0 0 0 0 0 0 0 0 0 0 0 0 0  
36.7830 12.1010 0.4740 H 0 0 0 0 0 0 0 0 0 0 0 0 0 0 0  
36.5520 12.2700 2.5290 O 0 0 0 0 0 0 0 0 0 0 0 0 0 0 0  
37.7030 11.6430 2.9050 C 0 0 0 0 0 0 0 0 0 0 0 0 0 0 0  
37.5230 11.0550 4.2810 C 0 0 0 0 0 0 0 0 0 0 0 0 0 0 0  
37.2340 11.8630 4.9630 H 0 0 0 0 0 0 0 0 0 0 0 0 0 0 0  
36.7080 10.3260 4.2300 H 0 0 0 0 0 0 0 0 0 0 0 0 0 0 0  
38.8150 10.4020 4.7720 C 0 0 0 0 0 0 0 0 0 0 0 0 0 0 0  
39.1770 9.6500 4.0590 H 0 0 0 0 0 0 0 0 0 0 0 0 0 0 0  
39.5970 11.1750 4.7820 H 0 0 0 0 0 0 0 0 0 0 0 0 0 0 0  
38.7180 11.5650 2.2280 O 0 0 0 0 0 0 0 0 0 0 0 0 0 0 0  
31.7390 17.6520 -4.0200 C 0 0 0 0 0 0 0 0 0 0 0 0 0 0 0  
31.5660 18.4120 -3.2480 H 0 0 0 0 0 0 0 0 0 0 0 0 0 0 0  
30.8340 17.0310 -4.0320 H 0 0 0 0 0 0 0 0 0 0 0 0 0 0 0  
32.9620 16.8210 -3.6320 C 0 0 0 0 0 0 0 0 0 0 0 0 0 0 0  
33.1220 16.0080 -4.3470 H 0 0 0 0 0 0 0 0 0 0 0 0 0 0 0  
33.8530 17.4600 -3.6080 H 0 0 0 0 0 0 0 0 0 0 0 0 0 0 0  
32.7860 16.2060 -2.2660 C 0 0 0 0 0 0 0 0 0 0 0 0 0 0 0  
33.9280 15.5470 -1.9160 O 0 0 0 0 0 0 0 0 0 0 0 0 0 0 0  
33.8800 14.9180 -0.6280 C 0 0 0 0 0 0 0 0 0 0 0 0 0 0 0  
33.6940 15.6770 0.1410 H 0 0 0 0 0 0 0 0 0 0 0 0 0 0 0  
33.0730 14.1760 -0.6140 H 0 0 0 0 0 0 0 0 0 0 0 0 0 0 0  
35.2220 14.2390 -0.3820 C 0 0 0 0 0 0 0 0 0 0 0 0 0 0 0  
35.4130 13.5120 -1.1820 H 0 0 0 0 0 0 0 0 0 0 0 0 0 0 0  
36.0240 14.9840 -0.4560 H 0 0 0 0 0 0 0 0 0 0 0 0 0 0 0  
31.7770 16.2790 -1.5800 O 0 0 0 0 0 0 0 0 0 0 0 0 0 0 0  
35.2600 13.5520 0.9780 C 0 0 0 0 0 0 0 0 0 0 0 0 0 0 0  
34.4580 12.8070 1.0500 H 0 0 0 0 0 0 0 0 0 0 0 0 0 0 0  
35.0660 14.2800 1.7760 H 0 0 0 0 0 0 0 0 0 0 0 0 0 0 0  
42.1170 11.0570 14.0520 O 0 0 0 0 0 0 0 0 0 0 0 0 0 0 0  
41.9480 10.7920 14.9710 H 0 0 0 0 0 0 0 0 0 0 0 0 0 0 0  
41.0970 10.4670 13.2560 C 0 0 0 0 0 0 0 0 0 0 0 0 0 0 0  
41.1430 9.3810 13.3820 H 0 0 0 0 0 0 0 0 0 0 0 0 0 0 0  
40.1260 10.8250 13.6140 H 0 0 0 0 0 0 0 0 0 0 0 0 0 0 0



|         |         |         |   |   |   |   |   |   |   |   |   |   |   |   |   |
|---------|---------|---------|---|---|---|---|---|---|---|---|---|---|---|---|---|
| 41.3130 | 10.8540 | 11.7980 | C | 0 | 0 | 0 | 0 | 0 | 0 | 0 | 0 | 0 | 0 | 0 | 0 |
| 41.3080 | 11.9480 | 11.7070 | H | 0 | 0 | 0 | 0 | 0 | 0 | 0 | 0 | 0 | 0 | 0 | 0 |
| 42.3130 | 10.5320 | 11.4830 | H | 0 | 0 | 0 | 0 | 0 | 0 | 0 | 0 | 0 | 0 | 0 | 0 |
| 40.2480 | 10.2420 | 10.8890 | C | 0 | 0 | 0 | 0 | 0 | 0 | 0 | 0 | 0 | 0 | 0 | 0 |
| 40.2610 | 9.1500  | 10.9970 | H | 0 | 0 | 0 | 0 | 0 | 0 | 0 | 0 | 0 | 0 | 0 | 0 |
| 39.2550 | 10.5850 | 11.2040 | H | 0 | 0 | 0 | 0 | 0 | 0 | 0 | 0 | 0 | 0 | 0 | 0 |
| 40.4760 | 10.6120 | 9.4210  | C | 0 | 0 | 0 | 0 | 0 | 0 | 0 | 0 | 0 | 0 | 0 | 0 |
| 40.4460 | 11.7030 | 9.3070  | H | 0 | 0 | 0 | 0 | 0 | 0 | 0 | 0 | 0 | 0 | 0 | 0 |
| 41.4750 | 10.2810 | 9.1100  | H | 0 | 0 | 0 | 0 | 0 | 0 | 0 | 0 | 0 | 0 | 0 | 0 |
| 39.4190 | 9.9690  | 8.5150  | C | 0 | 0 | 0 | 0 | 0 | 0 | 0 | 0 | 0 | 0 | 0 | 0 |
| 39.4440 | 8.8860  | 8.6790  | H | 0 | 0 | 0 | 0 | 0 | 0 | 0 | 0 | 0 | 0 | 0 | 0 |
| 38.4230 | 10.3230 | 8.8080  | H | 0 | 0 | 0 | 0 | 0 | 0 | 0 | 0 | 0 | 0 | 0 | 0 |
| 39.6720 | 10.2980 | 7.0350  | C | 0 | 0 | 0 | 0 | 0 | 0 | 0 | 0 | 0 | 0 | 0 | 0 |
| 39.7370 | 11.3920 | 6.9620  | H | 0 | 0 | 0 | 0 | 0 | 0 | 0 | 0 | 0 | 0 | 0 | 0 |
| 40.6470 | 9.8980  | 6.7250  | H | 0 | 0 | 0 | 0 | 0 | 0 | 0 | 0 | 0 | 0 | 0 | 0 |
| 38.6070 | 9.8300  | 6.1200  | N | 0 | 0 | 3 | 0 | 0 | 0 | 0 | 0 | 0 | 0 | 0 | 0 |
| 33.3910 | 2.2110  | 2.9530  | C | 0 | 0 | 0 | 0 | 0 | 0 | 0 | 0 | 0 | 0 | 0 | 0 |
| 33.6540 | 2.4780  | 1.9230  | H | 0 | 0 | 0 | 0 | 0 | 0 | 0 | 0 | 0 | 0 | 0 | 0 |
| 32.4710 | 2.7300  | 3.2450  | H | 0 | 0 | 0 | 0 | 0 | 0 | 0 | 0 | 0 | 0 | 0 | 0 |
| 33.1840 | 0.7960  | 3.0560  | O | 0 | 0 | 0 | 0 | 0 | 0 | 0 | 0 | 0 | 0 | 0 | 0 |
| 32.3220 | 0.2780  | 2.1390  | C | 0 | 0 | 0 | 0 | 0 | 0 | 0 | 0 | 0 | 0 | 0 | 0 |
| 32.1930 | -1.2100 | 2.3350  | C | 0 | 0 | 0 | 0 | 0 | 0 | 0 | 0 | 0 | 0 | 0 | 0 |
| 33.0740 | -1.5740 | 2.8760  | H | 0 | 0 | 0 | 0 | 0 | 0 | 0 | 0 | 0 | 0 | 0 | 0 |
| 31.3120 | -1.3970 | 2.9590  | H | 0 | 0 | 0 | 0 | 0 | 0 | 0 | 0 | 0 | 0 | 0 | 0 |
| 32.0790 | -1.9080 | 0.9830  | C | 0 | 0 | 0 | 0 | 0 | 0 | 0 | 0 | 0 | 0 | 0 | 0 |
| 31.1780 | -1.5510 | 0.4690  | H | 0 | 0 | 0 | 0 | 0 | 0 | 0 | 0 | 0 | 0 | 0 | 0 |
| 32.9020 | -1.5980 | 0.3250  | H | 0 | 0 | 0 | 0 | 0 | 0 | 0 | 0 | 0 | 0 | 0 | 0 |
| 31.7210 | 0.9200  | 1.2880  | O | 0 | 0 | 0 | 0 | 0 | 0 | 0 | 0 | 0 | 0 | 0 | 0 |
| 38.5300 | 8.3540  | 6.0930  | C | 0 | 0 | 0 | 0 | 0 | 0 | 0 | 0 | 0 | 0 | 0 | 0 |
| 39.4770 | 7.9280  | 5.7340  | H | 0 | 0 | 0 | 0 | 0 | 0 | 0 | 0 | 0 | 0 | 0 | 0 |
| 38.3880 | 7.9800  | 7.1130  | H | 0 | 0 | 0 | 0 | 0 | 0 | 0 | 0 | 0 | 0 | 0 | 0 |
| 37.3650 | 7.8030  | 5.2640  | C | 0 | 0 | 0 | 0 | 0 | 0 | 0 | 0 | 0 | 0 | 0 | 0 |
| 36.4220 | 8.2380  | 5.6120  | H | 0 | 0 | 0 | 0 | 0 | 0 | 0 | 0 | 0 | 0 | 0 | 0 |
| 37.5010 | 8.0240  | 4.2010  | H | 0 | 0 | 0 | 0 | 0 | 0 | 0 | 0 | 0 | 0 | 0 | 0 |
| 37.2690 | 6.3040  | 5.4090  | C | 0 | 0 | 0 | 0 | 0 | 0 | 0 | 0 | 0 | 0 | 0 | 0 |
| 36.2040 | 5.8460  | 4.6900  | O | 0 | 0 | 0 | 0 | 0 | 0 | 0 | 0 | 0 | 0 | 0 | 0 |
| 36.0030 | 4.4280  | 4.7630  | C | 0 | 0 | 0 | 0 | 0 | 0 | 0 | 0 | 0 | 0 | 0 | 0 |
| 36.9080 | 3.9100  | 4.4250  | H | 0 | 0 | 0 | 0 | 0 | 0 | 0 | 0 | 0 | 0 | 0 | 0 |
| 35.7840 | 4.1470  | 5.8000  | H | 0 | 0 | 0 | 0 | 0 | 0 | 0 | 0 | 0 | 0 | 0 | 0 |
| 34.8290 | 4.0730  | 3.8600  | C | 0 | 0 | 0 | 0 | 0 | 0 | 0 | 0 | 0 | 0 | 0 | 0 |
| 33.9440 | 4.6440  | 4.1690  | H | 0 | 0 | 0 | 0 | 0 | 0 | 0 | 0 | 0 | 0 | 0 | 0 |
| 35.0510 | 4.3960  | 2.8350  | H | 0 | 0 | 0 | 0 | 0 | 0 | 0 | 0 | 0 | 0 | 0 | 0 |
| 38.0280 | 5.6070  | 6.0670  | O | 0 | 0 | 0 | 0 | 0 | 0 | 0 | 0 | 0 | 0 | 0 | 0 |
| 34.5320 | 2.5800  | 3.8930  | C | 0 | 0 | 0 | 0 | 0 | 0 | 0 | 0 | 0 | 0 | 0 | 0 |
| 34.2800 | 2.2650  | 4.9140  | H | 0 | 0 | 0 | 0 | 0 | 0 | 0 | 0 | 0 | 0 | 0 | 0 |
| 35.4270 | 2.0080  | 3.6160  | H | 0 | 0 | 0 | 0 | 0 | 0 | 0 | 0 | 0 | 0 | 0 | 0 |
| 23.4580 | -4.8800 | 0.8210  | O | 0 | 0 | 0 | 0 | 0 | 0 | 0 | 0 | 0 | 0 | 0 | 0 |
| 22.6540 | -4.6290 | 1.3060  | H | 0 | 0 | 0 | 0 | 0 | 0 | 0 | 0 | 0 | 0 | 0 | 0 |
| 24.5520 | -4.2530 | 1.4780  | C | 0 | 0 | 0 | 0 | 0 | 0 | 0 | 0 | 0 | 0 | 0 | 0 |
| 24.3890 | -3.1700 | 1.4660  | H | 0 | 0 | 0 | 0 | 0 | 0 | 0 | 0 | 0 | 0 | 0 | 0 |
| 24.5770 | -4.5970 | 2.5170  | H | 0 | 0 | 0 | 0 | 0 | 0 | 0 | 0 | 0 | 0 | 0 | 0 |
| 25.8440 | -4.6150 | 0.7560  | C | 0 | 0 | 0 | 0 | 0 | 0 | 0 | 0 | 0 | 0 | 0 | 0 |
| 25.9590 | -5.7060 | 0.7440  | H | 0 | 0 | 0 | 0 | 0 | 0 | 0 | 0 | 0 | 0 | 0 | 0 |
| 25.7690 | -4.3100 | -0.2950 | H | 0 | 0 | 0 | 0 | 0 | 0 | 0 | 0 | 0 | 0 | 0 | 0 |
| 27.0610 | -3.9620 | 1.4110  | C | 0 | 0 | 0 | 0 | 0 | 0 | 0 | 0 | 0 | 0 | 0 | 0 |
| 26.9310 | -2.8730 | 1.4170  | H | 0 | 0 | 0 | 0 | 0 | 0 | 0 | 0 | 0 | 0 | 0 | 0 |
| 27.1330 | -4.2840 | 2.4570  | H | 0 | 0 | 0 | 0 | 0 | 0 | 0 | 0 | 0 | 0 | 0 | 0 |
| 28.3550 | -4.3190 | 0.6750  | C | 0 | 0 | 0 | 0 | 0 | 0 | 0 | 0 | 0 | 0 | 0 | 0 |
| 28.4930 | -5.4070 | 0.6810  | H | 0 | 0 | 0 | 0 | 0 | 0 | 0 | 0 | 0 | 0 | 0 | 0 |
| 28.2780 | -4.0080 | -0.3740 | H | 0 | 0 | 0 | 0 | 0 | 0 | 0 | 0 | 0 | 0 | 0 | 0 |
| 29.5710 | -3.6420 | 1.3190  | C | 0 | 0 | 0 | 0 | 0 | 0 | 0 | 0 | 0 | 0 | 0 | 0 |
| 29.4040 | -2.5590 | 1.3340  | H | 0 | 0 | 0 | 0 | 0 | 0 | 0 | 0 | 0 | 0 | 0 | 0 |
| 29.6590 | -3.9670 | 2.3630  | H | 0 | 0 | 0 | 0 | 0 | 0 | 0 | 0 | 0 | 0 | 0 | 0 |
| 30.8660 | -3.9870 | 0.5640  | C | 0 | 0 | 0 | 0 | 0 | 0 | 0 | 0 | 0 | 0 | 0 | 0 |
| 30.9670 | -5.0800 | 0.5890  | H | 0 | 0 | 0 | 0 | 0 | 0 | 0 | 0 | 0 | 0 | 0 | 0 |
| 30.7850 | -3.7010 | -0.4920 | H | 0 | 0 | 0 | 0 | 0 | 0 | 0 | 0 | 0 | 0 | 0 | 0 |
| 32.0580 | -3.3710 | 1.1820  | N | 0 | 0 | 3 | 0 | 0 | 0 | 0 | 0 | 0 | 0 | 0 | 0 |
| 41.4510 | -4.7930 | 3.2330  | C | 0 | 0 | 0 | 0 | 0 | 0 | 0 | 0 | 0 | 0 | 0 | 0 |
| 41.1170 | -5.1400 | 4.2180  | H | 0 | 0 | 0 | 0 | 0 | 0 | 0 | 0 | 0 | 0 | 0 | 0 |
| 41.6290 | -3.7120 | 3.2650  | H | 0 | 0 | 0 | 0 | 0 | 0 | 0 | 0 | 0 | 0 | 0 | 0 |
| 42.6670 | -5.4650 | 2.8760  | O | 0 | 0 | 0 | 0 | 0 | 0 | 0 | 0 | 0 | 0 | 0 | 0 |
| 43.6950 | -5.2830 | 3.7550  | C | 0 | 0 | 0 | 0 | 0 | 0 | 0 | 0 | 0 | 0 | 0 | 0 |
| 44.9090 | -6.0410 | 3.2750  | C | 0 | 0 | 0 | 0 | 0 | 0 | 0 | 0 | 0 | 0 | 0 | 0 |
| 44.6350 | -7.1000 | 3.2340  | H | 0 | 0 | 0 | 0 | 0 | 0 | 0 | 0 | 0 | 0 | 0 | 0 |
| 45.1570 | -5.6890 | 2.2670  | H | 0 | 0 | 0 | 0 | 0 | 0 | 0 | 0 | 0 | 0 | 0 | 0 |
| 46.1030 | -5.8200 | 4.2130  | C | 0 | 0 | 0 | 0 | 0 | 0 | 0 | 0 | 0 | 0 | 0 | 0 |
| 46.2340 | -4.7340 | 4.3160  | H | 0 | 0 | 0 | 0 | 0 | 0 | 0 | 0 | 0 | 0 | 0 | 0 |
| 45.8700 | -6.2050 | 5.2150  | H | 0 | 0 | 0 | 0 | 0 | 0 | 0 | 0 | 0 | 0 | 0 | 0 |
| 43.6370 | -4.6160 | 4.7780  | O | 0 | 0 | 0 | 0 | 0 | 0 | 0 | 0 | 0 | 0 | 0 | 0 |
| 33.2840 | -4.0180 | 0.6670  | C | 0 | 0 | 0 | 0 | 0 | 0 | 0 | 0 | 0 | 0 | 0 | 0 |
| 33.1730 | -5.1080 | 0.7460  | H | 0 | 0 | 0 | 0 | 0 | 0 | 0 | 0 | 0 | 0 | 0 | 0 |

|         |          |         |   |   |   |   |   |   |   |   |   |   |   |   |   |
|---------|----------|---------|---|---|---|---|---|---|---|---|---|---|---|---|---|
| 33.4200 | -3.7960  | -0.4000 | H | 0 | 0 | 0 | 0 | 0 | 0 | 0 | 0 | 0 | 0 | 0 | 0 |
| 34.5350 | -3.6300  | 1.4610  | C | 0 | 0 | 0 | 0 | 0 | 0 | 0 | 0 | 0 | 0 | 0 | 0 |
| 34.7560 | -2.5640  | 1.3540  | H | 0 | 0 | 0 | 0 | 0 | 0 | 0 | 0 | 0 | 0 | 0 | 0 |
| 34.3850 | -3.8640  | 2.5210  | H | 0 | 0 | 0 | 0 | 0 | 0 | 0 | 0 | 0 | 0 | 0 | 0 |
| 35.7420 | -4.3920  | 0.9770  | C | 0 | 0 | 0 | 0 | 0 | 0 | 0 | 0 | 0 | 0 | 0 | 0 |
| 36.8000 | -4.1220  | 1.7940  | O | 0 | 0 | 0 | 0 | 0 | 0 | 0 | 0 | 0 | 0 | 0 | 0 |
| 38.0160 | -4.7920  | 1.4340  | C | 0 | 0 | 0 | 0 | 0 | 0 | 0 | 0 | 0 | 0 | 0 | 0 |
| 37.8460 | -5.8750  | 1.4140  | H | 0 | 0 | 0 | 0 | 0 | 0 | 0 | 0 | 0 | 0 | 0 | 0 |
| 38.3370 | -4.4520  | 0.4430  | H | 0 | 0 | 0 | 0 | 0 | 0 | 0 | 0 | 0 | 0 | 0 | 0 |
| 39.0700 | -4.4470  | 2.4790  | C | 0 | 0 | 0 | 0 | 0 | 0 | 0 | 0 | 0 | 0 | 0 | 0 |
| 39.1970 | -3.3580  | 2.5210  | H | 0 | 0 | 0 | 0 | 0 | 0 | 0 | 0 | 0 | 0 | 0 | 0 |
| 38.7080 | -4.7450  | 3.4710  | H | 0 | 0 | 0 | 0 | 0 | 0 | 0 | 0 | 0 | 0 | 0 | 0 |
| 35.7740 | -5.1240  | -0.0020 | O | 0 | 0 | 0 | 0 | 0 | 0 | 0 | 0 | 0 | 0 | 0 | 0 |
| 40.4020 | -5.1230  | 2.1780  | C | 0 | 0 | 0 | 0 | 0 | 0 | 0 | 0 | 0 | 0 | 0 | 0 |
| 40.7700 | -4.8160  | 1.1910  | H | 0 | 0 | 0 | 0 | 0 | 0 | 0 | 0 | 0 | 0 | 0 | 0 |
| 40.2730 | -6.2120  | 2.1240  | H | 0 | 0 | 0 | 0 | 0 | 0 | 0 | 0 | 0 | 0 | 0 | 0 |
| 50.8850 | -14.2270 | 2.0000  | O | 0 | 0 | 0 | 0 | 0 | 0 | 0 | 0 | 0 | 0 | 0 | 0 |
| 51.7750 | -14.5860 | 1.8400  | H | 0 | 0 | 0 | 0 | 0 | 0 | 0 | 0 | 0 | 0 | 0 | 0 |
| 51.0200 | -12.8170 | 2.0990  | C | 0 | 0 | 0 | 0 | 0 | 0 | 0 | 0 | 0 | 0 | 0 | 0 |
| 51.7650 | -12.5920 | 2.8690  | H | 0 | 0 | 0 | 0 | 0 | 0 | 0 | 0 | 0 | 0 | 0 | 0 |
| 51.3740 | -12.4330 | 1.1380  | H | 0 | 0 | 0 | 0 | 0 | 0 | 0 | 0 | 0 | 0 | 0 | 0 |
| 49.6680 | -12.2150 | 2.4620  | C | 0 | 0 | 0 | 0 | 0 | 0 | 0 | 0 | 0 | 0 | 0 | 0 |
| 48.9240 | -12.5010 | 1.7090  | H | 0 | 0 | 0 | 0 | 0 | 0 | 0 | 0 | 0 | 0 | 0 | 0 |
| 49.3210 | -12.6480 | 3.4080  | H | 0 | 0 | 0 | 0 | 0 | 0 | 0 | 0 | 0 | 0 | 0 | 0 |
| 49.7560 | -10.6970 | 2.5730  | C | 0 | 0 | 0 | 0 | 0 | 0 | 0 | 0 | 0 | 0 | 0 | 0 |
| 50.5340 | -10.4310 | 3.3000  | H | 0 | 0 | 0 | 0 | 0 | 0 | 0 | 0 | 0 | 0 | 0 | 0 |
| 50.0650 | -10.2770 | 1.6070  | H | 0 | 0 | 0 | 0 | 0 | 0 | 0 | 0 | 0 | 0 | 0 | 0 |
| 48.4260 | -10.0720 | 3.0010  | C | 0 | 0 | 0 | 0 | 0 | 0 | 0 | 0 | 0 | 0 | 0 | 0 |
| 47.6450 | -10.3160 | 2.2720  | H | 0 | 0 | 0 | 0 | 0 | 0 | 0 | 0 | 0 | 0 | 0 | 0 |
| 48.1170 | -10.4900 | 3.9670  | H | 0 | 0 | 0 | 0 | 0 | 0 | 0 | 0 | 0 | 0 | 0 | 0 |
| 48.5730 | -8.5530  | 3.1190  | C | 0 | 0 | 0 | 0 | 0 | 0 | 0 | 0 | 0 | 0 | 0 | 0 |
| 49.4120 | -8.3500  | 3.7930  | H | 0 | 0 | 0 | 0 | 0 | 0 | 0 | 0 | 0 | 0 | 0 | 0 |
| 48.8270 | -8.1420  | 2.1340  | H | 0 | 0 | 0 | 0 | 0 | 0 | 0 | 0 | 0 | 0 | 0 | 0 |
| 47.2970 | -7.8790  | 3.6440  | C | 0 | 0 | 0 | 0 | 0 | 0 | 0 | 0 | 0 | 0 | 0 | 0 |
| 46.4900 | -8.1650  | 2.9600  | H | 0 | 0 | 0 | 0 | 0 | 0 | 0 | 0 | 0 | 0 | 0 | 0 |
| 47.0480 | -8.2930  | 4.6300  | H | 0 | 0 | 0 | 0 | 0 | 0 | 0 | 0 | 0 | 0 | 0 | 0 |
| 47.3740 | -6.3990  | 3.7170  | N | 0 | 0 | 3 | 0 | 0 | 0 | 0 | 0 | 0 | 0 | 0 | 0 |
| 54.1570 | -9.2830  | 8.0380  | C | 0 | 0 | 0 | 0 | 0 | 0 | 0 | 0 | 0 | 0 | 0 | 0 |
| 54.3570 | -10.0300 | 7.2610  | H | 0 | 0 | 0 | 0 | 0 | 0 | 0 | 0 | 0 | 0 | 0 | 0 |
| 53.2770 | -9.5820  | 8.6200  | H | 0 | 0 | 0 | 0 | 0 | 0 | 0 | 0 | 0 | 0 | 0 | 0 |
| 55.2950 | -9.1800  | 8.9060  | O | 0 | 0 | 0 | 0 | 0 | 0 | 0 | 0 | 0 | 0 | 0 | 0 |
| 55.6100 | -10.3250 | 9.5780  | C | 0 | 0 | 0 | 0 | 0 | 0 | 0 | 0 | 0 | 0 | 0 | 0 |
| 56.8130 | -10.0760 | 10.4580 | C | 0 | 0 | 0 | 0 | 0 | 0 | 0 | 0 | 0 | 0 | 0 | 0 |
| 57.6180 | -9.7230  | 9.8060  | H | 0 | 0 | 0 | 0 | 0 | 0 | 0 | 0 | 0 | 0 | 0 | 0 |
| 56.5580 | -9.2880  | 11.1740 | H | 0 | 0 | 0 | 0 | 0 | 0 | 0 | 0 | 0 | 0 | 0 | 0 |
| 57.2290 | -11.3520 | 11.2000 | C | 0 | 0 | 0 | 0 | 0 | 0 | 0 | 0 | 0 | 0 | 0 | 0 |
| 56.4130 | -11.6550 | 11.8710 | H | 0 | 0 | 0 | 0 | 0 | 0 | 0 | 0 | 0 | 0 | 0 | 0 |
| 57.2990 | -12.1890 | 10.4940 | H | 0 | 0 | 0 | 0 | 0 | 0 | 0 | 0 | 0 | 0 | 0 | 0 |
| 55.0100 | -11.3860 | 9.4760  | O | 0 | 0 | 0 | 0 | 0 | 0 | 0 | 0 | 0 | 0 | 0 | 0 |
| 48.4990 | -5.9510  | 4.5670  | C | 0 | 0 | 0 | 0 | 0 | 0 | 0 | 0 | 0 | 0 | 0 | 0 |
| 48.2220 | -5.0650  | 5.1570  | H | 0 | 0 | 0 | 0 | 0 | 0 | 0 | 0 | 0 | 0 | 0 | 0 |
| 48.7580 | -6.7080  | 5.3190  | H | 0 | 0 | 0 | 0 | 0 | 0 | 0 | 0 | 0 | 0 | 0 | 0 |
| 49.6980 | -5.5420  | 3.7110  | C | 0 | 0 | 0 | 0 | 0 | 0 | 0 | 0 | 0 | 0 | 0 | 0 |
| 49.9380 | -6.2550  | 2.9180  | H | 0 | 0 | 0 | 0 | 0 | 0 | 0 | 0 | 0 | 0 | 0 | 0 |
| 49.4940 | -4.5870  | 3.2110  | H | 0 | 0 | 0 | 0 | 0 | 0 | 0 | 0 | 0 | 0 | 0 | 0 |
| 50.9280 | -5.3790  | 4.5620  | C | 0 | 0 | 0 | 0 | 0 | 0 | 0 | 0 | 0 | 0 | 0 | 0 |
| 51.3430 | -6.5870  | 5.0380  | O | 0 | 0 | 0 | 0 | 0 | 0 | 0 | 0 | 0 | 0 | 0 | 0 |
| 52.5010 | -6.5230  | 5.8810  | C | 0 | 0 | 0 | 0 | 0 | 0 | 0 | 0 | 0 | 0 | 0 | 0 |
| 53.3660 | -6.2170  | 5.2810  | H | 0 | 0 | 0 | 0 | 0 | 0 | 0 | 0 | 0 | 0 | 0 | 0 |
| 52.3360 | -5.7960  | 6.6840  | H | 0 | 0 | 0 | 0 | 0 | 0 | 0 | 0 | 0 | 0 | 0 | 0 |
| 52.7310 | -7.9080  | 6.4730  | C | 0 | 0 | 0 | 0 | 0 | 0 | 0 | 0 | 0 | 0 | 0 | 0 |
| 51.8290 | -8.2280  | 7.0100  | H | 0 | 0 | 0 | 0 | 0 | 0 | 0 | 0 | 0 | 0 | 0 | 0 |
| 52.8730 | -8.6340  | 5.6630  | H | 0 | 0 | 0 | 0 | 0 | 0 | 0 | 0 | 0 | 0 | 0 | 0 |
| 51.4760 | -4.3070  | 4.7790  | O | 0 | 0 | 0 | 0 | 0 | 0 | 0 | 0 | 0 | 0 | 0 | 0 |
| 53.9330 | -7.9140  | 7.4090  | C | 0 | 0 | 0 | 0 | 0 | 0 | 0 | 0 | 0 | 0 | 0 | 0 |
| 53.7980 | -7.1700  | 8.2050  | H | 0 | 0 | 0 | 0 | 0 | 0 | 0 | 0 | 0 | 0 | 0 | 0 |
| 54.8380 | -7.6100  | 6.8670  | H | 0 | 0 | 0 | 0 | 0 | 0 | 0 | 0 | 0 | 0 | 0 | 0 |
| 63.7770 | -12.1250 | 5.0610  | O | 0 | 0 | 0 | 0 | 0 | 0 | 0 | 0 | 0 | 0 | 0 | 0 |
| 63.8230 | -12.6450 | 4.2410  | H | 0 | 0 | 0 | 0 | 0 | 0 | 0 | 0 | 0 | 0 | 0 | 0 |
| 62.6420 | -12.5860 | 5.7810  | C | 0 | 0 | 0 | 0 | 0 | 0 | 0 | 0 | 0 | 0 | 0 | 0 |
| 61.7540 | -12.4430 | 5.1570  | H | 0 | 0 | 0 | 0 | 0 | 0 | 0 | 0 | 0 | 0 | 0 | 0 |
| 62.7670 | -13.6550 | 5.9830  | H | 0 | 0 | 0 | 0 | 0 | 0 | 0 | 0 | 0 | 0 | 0 | 0 |
| 62.5250 | -11.8000 | 7.0810  | C | 0 | 0 | 0 | 0 | 0 | 0 | 0 | 0 | 0 | 0 | 0 | 0 |
| 63.4390 | -11.9340 | 7.6730  | H | 0 | 0 | 0 | 0 | 0 | 0 | 0 | 0 | 0 | 0 | 0 | 0 |
| 62.4720 | -10.7280 | 6.8510  | H | 0 | 0 | 0 | 0 | 0 | 0 | 0 | 0 | 0 | 0 | 0 | 0 |
| 61.3020 | -12.2300 | 7.8870  | C | 0 | 0 | 0 | 0 | 0 | 0 | 0 | 0 | 0 | 0 | 0 | 0 |
| 60.4020 | -12.1080 | 7.2710  | H | 0 | 0 | 0 | 0 | 0 | 0 | 0 | 0 | 0 | 0 | 0 | 0 |
| 61.3790 | -13.2950 | 8.1360  | H | 0 | 0 | 0 | 0 | 0 | 0 | 0 | 0 | 0 | 0 | 0 | 0 |
| 61.1540 | -11.4120 | 9.1720  | C | 0 | 0 | 0 | 0 | 0 | 0 | 0 | 0 | 0 | 0 | 0 | 0 |
| 62.0290 | -11.5690 | 9.8140  | H | 0 | 0 | 0 | 0 | 0 | 0 | 0 | 0 | 0 | 0 | 0 | 0 |
| 61.1200 | -10.3440 | 8.9240  | H | 0 | 0 | 0 | 0 | 0 | 0 | 0 | 0 | 0 | 0 | 0 | 0 |

|         |          |         |   |   |   |   |   |   |   |   |   |   |   |   |   |   |
|---------|----------|---------|---|---|---|---|---|---|---|---|---|---|---|---|---|---|
| 59.8790 | -11.8020 | 9.9270  | C | 0 | 0 | 0 | 0 | 0 | 0 | 0 | 0 | 0 | 0 | 0 | 0 | 0 |
| 59.0330 | -11.6960 | 9.2380  | H | 0 | 0 | 0 | 0 | 0 | 0 | 0 | 0 | 0 | 0 | 0 | 0 | 0 |
| 59.9330 | -12.8580 | 10.2190 | H | 0 | 0 | 0 | 0 | 0 | 0 | 0 | 0 | 0 | 0 | 0 | 0 | 0 |
| 59.6710 | -10.9270 | 11.1750 | C | 0 | 0 | 0 | 0 | 0 | 0 | 0 | 0 | 0 | 0 | 0 | 0 | 0 |
| 60.5680 | -11.0450 | 11.7920 | H | 0 | 0 | 0 | 0 | 0 | 0 | 0 | 0 | 0 | 0 | 0 | 0 | 0 |
| 59.6320 | -9.8720  | 10.8790 | H | 0 | 0 | 0 | 0 | 0 | 0 | 0 | 0 | 0 | 0 | 0 | 0 | 0 |
| 58.4840 | -11.2840 | 11.9770 | N | 0 | 0 | 3 | 0 | 0 | 0 | 0 | 0 | 0 | 0 | 0 | 0 | 0 |
| 62.0610 | -9.8600  | 20.9180 | C | 0 | 0 | 0 | 0 | 0 | 0 | 0 | 0 | 0 | 0 | 0 | 0 | 0 |
| 63.0440 | -9.6240  | 20.4940 | H | 0 | 0 | 0 | 0 | 0 | 0 | 0 | 0 | 0 | 0 | 0 | 0 | 0 |
| 61.9770 | -10.9420 | 21.0720 | H | 0 | 0 | 0 | 0 | 0 | 0 | 0 | 0 | 0 | 0 | 0 | 0 | 0 |
| 61.9080 | -9.1850  | 22.1740 | O | 0 | 0 | 0 | 0 | 0 | 0 | 0 | 0 | 0 | 0 | 0 | 0 | 0 |
| 62.8390 | -9.5230  | 23.1130 | C | 0 | 0 | 0 | 0 | 0 | 0 | 0 | 0 | 0 | 0 | 0 | 0 | 0 |
| 62.5690 | -8.7500  | 24.3810 | C | 0 | 0 | 0 | 0 | 0 | 0 | 0 | 0 | 0 | 0 | 0 | 0 | 0 |
| 62.6130 | -7.6800  | 24.1510 | H | 0 | 0 | 0 | 0 | 0 | 0 | 0 | 0 | 0 | 0 | 0 | 0 | 0 |
| 61.5620 | -9.0000  | 24.7320 | H | 0 | 0 | 0 | 0 | 0 | 0 | 0 | 0 | 0 | 0 | 0 | 0 | 0 |
| 63.5760 | -9.0720  | 25.4710 | C | 0 | 0 | 0 | 0 | 0 | 0 | 0 | 0 | 0 | 0 | 0 | 0 | 0 |
| 63.5520 | -10.1360 | 25.7270 | H | 0 | 0 | 0 | 0 | 0 | 0 | 0 | 0 | 0 | 0 | 0 | 0 | 0 |
| 63.3560 | -8.4970  | 26.3760 | H | 0 | 0 | 0 | 0 | 0 | 0 | 0 | 0 | 0 | 0 | 0 | 0 | 0 |
| 64.5950 | -8.8280  | 25.1500 | H | 0 | 0 | 0 | 0 | 0 | 0 | 0 | 0 | 0 | 0 | 0 | 0 | 0 |
| 63.7460 | -10.3260 | 22.9490 | O | 0 | 0 | 0 | 0 | 0 | 0 | 0 | 0 | 0 | 0 | 0 | 0 | 0 |
| 58.3390 | -10.4270 | 13.1720 | C | 0 | 0 | 0 | 0 | 0 | 0 | 0 | 0 | 0 | 0 | 0 | 0 | 0 |
| 58.3230 | -9.3660  | 12.8910 | H | 0 | 0 | 0 | 0 | 0 | 0 | 0 | 0 | 0 | 0 | 0 | 0 | 0 |
| 57.3710 | -10.6360 | 13.6470 | H | 0 | 0 | 0 | 0 | 0 | 0 | 0 | 0 | 0 | 0 | 0 | 0 | 0 |
| 59.4280 | -10.6800 | 14.2210 | C | 0 | 0 | 0 | 0 | 0 | 0 | 0 | 0 | 0 | 0 | 0 | 0 | 0 |
| 59.4600 | -11.7460 | 14.4720 | H | 0 | 0 | 0 | 0 | 0 | 0 | 0 | 0 | 0 | 0 | 0 | 0 | 0 |
| 60.4100 | -10.3650 | 13.8520 | H | 0 | 0 | 0 | 0 | 0 | 0 | 0 | 0 | 0 | 0 | 0 | 0 | 0 |
| 59.1590 | -9.9070  | 15.4900 | C | 0 | 0 | 0 | 0 | 0 | 0 | 0 | 0 | 0 | 0 | 0 | 0 | 0 |
| 60.0890 | -10.2400 | 16.4330 | O | 0 | 0 | 0 | 0 | 0 | 0 | 0 | 0 | 0 | 0 | 0 | 0 | 0 |
| 59.9380 | -9.5600  | 17.6870 | C | 0 | 0 | 0 | 0 | 0 | 0 | 0 | 0 | 0 | 0 | 0 | 0 | 0 |
| 60.0250 | -8.4790  | 17.5290 | H | 0 | 0 | 0 | 0 | 0 | 0 | 0 | 0 | 0 | 0 | 0 | 0 | 0 |
| 58.9550 | -9.7920  | 18.1120 | H | 0 | 0 | 0 | 0 | 0 | 0 | 0 | 0 | 0 | 0 | 0 | 0 | 0 |
| 61.0410 | -10.0460 | 18.6200 | C | 0 | 0 | 0 | 0 | 0 | 0 | 0 | 0 | 0 | 0 | 0 | 0 | 0 |
| 60.9730 | -11.1350 | 18.7270 | H | 0 | 0 | 0 | 0 | 0 | 0 | 0 | 0 | 0 | 0 | 0 | 0 | 0 |
| 62.0180 | -9.8500  | 18.1600 | H | 0 | 0 | 0 | 0 | 0 | 0 | 0 | 0 | 0 | 0 | 0 | 0 | 0 |
| 58.2560 | -9.0970  | 15.6450 | O | 0 | 0 | 0 | 0 | 0 | 0 | 0 | 0 | 0 | 0 | 0 | 0 | 0 |
| 60.9570 | -9.3750  | 19.9860 | C | 0 | 0 | 0 | 0 | 0 | 0 | 0 | 0 | 0 | 0 | 0 | 0 | 0 |
| 59.9810 | -9.5710  | 20.4460 | H | 0 | 0 | 0 | 0 | 0 | 0 | 0 | 0 | 0 | 0 | 0 | 0 | 0 |
| 61.0250 | -8.2850  | 19.8790 | H | 0 | 0 | 0 | 0 | 0 | 0 | 0 | 0 | 0 | 0 | 0 | 0 | 0 |
| 1       | 2        | 1       | 0 | 0 | 0 | 0 |   |   |   |   |   |   |   |   |   |   |
| 1       | 3        | 1       | 0 | 0 | 0 | 0 |   |   |   |   |   |   |   |   |   |   |
| 3       | 4        | 1       | 0 | 0 | 0 | 0 |   |   |   |   |   |   |   |   |   |   |
| 3       | 5        | 1       | 0 | 0 | 0 | 0 |   |   |   |   |   |   |   |   |   |   |
| 3       | 6        | 1       | 0 | 0 | 0 | 0 |   |   |   |   |   |   |   |   |   |   |
| 6       | 7        | 1       | 0 | 0 | 0 | 0 |   |   |   |   |   |   |   |   |   |   |
| 6       | 8        | 1       | 0 | 0 | 0 | 0 |   |   |   |   |   |   |   |   |   |   |
| 6       | 9        | 1       | 0 | 0 | 0 | 0 |   |   |   |   |   |   |   |   |   |   |
| 9       | 10       | 1       | 0 | 0 | 0 | 0 |   |   |   |   |   |   |   |   |   |   |
| 9       | 11       | 1       | 0 | 0 | 0 | 0 |   |   |   |   |   |   |   |   |   |   |
| 9       | 12       | 1       | 0 | 0 | 0 | 0 |   |   |   |   |   |   |   |   |   |   |
| 12      | 13       | 1       | 0 | 0 | 0 | 0 |   |   |   |   |   |   |   |   |   |   |
| 12      | 14       | 1       | 0 | 0 | 0 | 0 |   |   |   |   |   |   |   |   |   |   |
| 12      | 15       | 1       | 0 | 0 | 0 | 0 |   |   |   |   |   |   |   |   |   |   |
| 15      | 16       | 1       | 0 | 0 | 0 | 0 |   |   |   |   |   |   |   |   |   |   |
| 15      | 17       | 1       | 0 | 0 | 0 | 0 |   |   |   |   |   |   |   |   |   |   |
| 15      | 18       | 1       | 0 | 0 | 0 | 0 |   |   |   |   |   |   |   |   |   |   |
| 18      | 19       | 1       | 0 | 0 | 0 | 0 |   |   |   |   |   |   |   |   |   |   |
| 18      | 20       | 1       | 0 | 0 | 0 | 0 |   |   |   |   |   |   |   |   |   |   |
| 18      | 21       | 1       | 0 | 0 | 0 | 0 |   |   |   |   |   |   |   |   |   |   |
| 21      | 22       | 1       | 0 | 0 | 0 | 0 |   |   |   |   |   |   |   |   |   |   |
| 21      | 35       | 1       | 0 | 0 | 0 | 0 |   |   |   |   |   |   |   |   |   |   |
| 23      | 24       | 1       | 0 | 0 | 0 | 0 |   |   |   |   |   |   |   |   |   |   |
| 23      | 25       | 1       | 0 | 0 | 0 | 0 |   |   |   |   |   |   |   |   |   |   |
| 23      | 26       | 1       | 0 | 0 | 0 | 0 |   |   |   |   |   |   |   |   |   |   |
| 23      | 50       | 1       | 0 | 0 | 0 | 0 |   |   |   |   |   |   |   |   |   |   |
| 26      | 27       | 1       | 0 | 0 | 0 | 0 |   |   |   |   |   |   |   |   |   |   |
| 27      | 28       | 1       | 0 | 0 | 0 | 0 |   |   |   |   |   |   |   |   |   |   |
| 27      | 34       | 2       | 0 | 0 | 0 | 0 |   |   |   |   |   |   |   |   |   |   |
| 28      | 29       | 1       | 0 | 0 | 0 | 0 |   |   |   |   |   |   |   |   |   |   |
| 28      | 30       | 1       | 0 | 0 | 0 | 0 |   |   |   |   |   |   |   |   |   |   |
| 28      | 31       | 1       | 0 | 0 | 0 | 0 |   |   |   |   |   |   |   |   |   |   |
| 31      | 32       | 1       | 0 | 0 | 0 | 0 |   |   |   |   |   |   |   |   |   |   |
| 31      | 33       | 1       | 0 | 0 | 0 | 0 |   |   |   |   |   |   |   |   |   |   |
| 31      | 73       | 1       | 0 | 0 | 0 | 0 |   |   |   |   |   |   |   |   |   |   |
| 35      | 36       | 1       | 0 | 0 | 0 | 0 |   |   |   |   |   |   |   |   |   |   |
| 35      | 37       | 1       | 0 | 0 | 0 | 0 |   |   |   |   |   |   |   |   |   |   |
| 35      | 38       | 1       | 0 | 0 | 0 | 0 |   |   |   |   |   |   |   |   |   |   |
| 38      | 39       | 1       | 0 | 0 | 0 | 0 |   |   |   |   |   |   |   |   |   |   |
| 38      | 40       | 1       | 0 | 0 | 0 | 0 |   |   |   |   |   |   |   |   |   |   |
| 38      | 41       | 1       | 0 | 0 | 0 | 0 |   |   |   |   |   |   |   |   |   |   |
| 41      | 42       | 1       | 0 | 0 | 0 | 0 |   |   |   |   |   |   |   |   |   |   |
| 41      | 49       | 2       | 0 | 0 | 0 | 0 |   |   |   |   |   |   |   |   |   |   |

|     |     |   |   |   |   |   |
|-----|-----|---|---|---|---|---|
| 42  | 43  | 1 | 0 | 0 | 0 | 0 |
| 43  | 44  | 1 | 0 | 0 | 0 | 0 |
| 43  | 45  | 1 | 0 | 0 | 0 | 0 |
| 43  | 46  | 1 | 0 | 0 | 0 | 0 |
| 46  | 47  | 1 | 0 | 0 | 0 | 0 |
| 46  | 48  | 1 | 0 | 0 | 0 | 0 |
| 46  | 50  | 1 | 0 | 0 | 0 | 0 |
| 50  | 51  | 1 | 0 | 0 | 0 | 0 |
| 50  | 52  | 1 | 0 | 0 | 0 | 0 |
| 53  | 54  | 1 | 0 | 0 | 0 | 0 |
| 53  | 55  | 1 | 0 | 0 | 0 | 0 |
| 55  | 56  | 1 | 0 | 0 | 0 | 0 |
| 55  | 57  | 1 | 0 | 0 | 0 | 0 |
| 55  | 58  | 1 | 0 | 0 | 0 | 0 |
| 58  | 59  | 1 | 0 | 0 | 0 | 0 |
| 58  | 60  | 1 | 0 | 0 | 0 | 0 |
| 58  | 61  | 1 | 0 | 0 | 0 | 0 |
| 61  | 62  | 1 | 0 | 0 | 0 | 0 |
| 61  | 63  | 1 | 0 | 0 | 0 | 0 |
| 61  | 64  | 1 | 0 | 0 | 0 | 0 |
| 64  | 65  | 1 | 0 | 0 | 0 | 0 |
| 64  | 66  | 1 | 0 | 0 | 0 | 0 |
| 64  | 67  | 1 | 0 | 0 | 0 | 0 |
| 67  | 68  | 1 | 0 | 0 | 0 | 0 |
| 67  | 69  | 1 | 0 | 0 | 0 | 0 |
| 67  | 70  | 1 | 0 | 0 | 0 | 0 |
| 70  | 71  | 1 | 0 | 0 | 0 | 0 |
| 70  | 72  | 1 | 0 | 0 | 0 | 0 |
| 70  | 73  | 1 | 0 | 0 | 0 | 0 |
| 73  | 86  | 1 | 0 | 0 | 0 | 0 |
| 74  | 75  | 1 | 0 | 0 | 0 | 0 |
| 74  | 76  | 1 | 0 | 0 | 0 | 0 |
| 74  | 77  | 1 | 0 | 0 | 0 | 0 |
| 74  | 101 | 1 | 0 | 0 | 0 | 0 |
| 77  | 78  | 1 | 0 | 0 | 0 | 0 |
| 78  | 79  | 1 | 0 | 0 | 0 | 0 |
| 78  | 85  | 2 | 0 | 0 | 0 | 0 |
| 79  | 80  | 1 | 0 | 0 | 0 | 0 |
| 79  | 81  | 1 | 0 | 0 | 0 | 0 |
| 79  | 82  | 1 | 0 | 0 | 0 | 0 |
| 82  | 83  | 1 | 0 | 0 | 0 | 0 |
| 82  | 84  | 1 | 0 | 0 | 0 | 0 |
| 82  | 124 | 1 | 0 | 0 | 0 | 0 |
| 86  | 87  | 1 | 0 | 0 | 0 | 0 |
| 86  | 88  | 1 | 0 | 0 | 0 | 0 |
| 86  | 89  | 1 | 0 | 0 | 0 | 0 |
| 89  | 90  | 1 | 0 | 0 | 0 | 0 |
| 89  | 91  | 1 | 0 | 0 | 0 | 0 |
| 89  | 92  | 1 | 0 | 0 | 0 | 0 |
| 92  | 93  | 1 | 0 | 0 | 0 | 0 |
| 92  | 100 | 2 | 0 | 0 | 0 | 0 |
| 93  | 94  | 1 | 0 | 0 | 0 | 0 |
| 94  | 95  | 1 | 0 | 0 | 0 | 0 |
| 94  | 96  | 1 | 0 | 0 | 0 | 0 |
| 94  | 97  | 1 | 0 | 0 | 0 | 0 |
| 97  | 98  | 1 | 0 | 0 | 0 | 0 |
| 97  | 99  | 1 | 0 | 0 | 0 | 0 |
| 97  | 101 | 1 | 0 | 0 | 0 | 0 |
| 101 | 102 | 1 | 0 | 0 | 0 | 0 |
| 101 | 103 | 1 | 0 | 0 | 0 | 0 |
| 104 | 105 | 1 | 0 | 0 | 0 | 0 |
| 104 | 106 | 1 | 0 | 0 | 0 | 0 |
| 106 | 107 | 1 | 0 | 0 | 0 | 0 |
| 106 | 108 | 1 | 0 | 0 | 0 | 0 |
| 106 | 109 | 1 | 0 | 0 | 0 | 0 |
| 109 | 110 | 1 | 0 | 0 | 0 | 0 |
| 109 | 111 | 1 | 0 | 0 | 0 | 0 |
| 109 | 112 | 1 | 0 | 0 | 0 | 0 |
| 112 | 113 | 1 | 0 | 0 | 0 | 0 |
| 112 | 114 | 1 | 0 | 0 | 0 | 0 |
| 112 | 115 | 1 | 0 | 0 | 0 | 0 |
| 115 | 116 | 1 | 0 | 0 | 0 | 0 |
| 115 | 117 | 1 | 0 | 0 | 0 | 0 |
| 115 | 118 | 1 | 0 | 0 | 0 | 0 |
| 118 | 119 | 1 | 0 | 0 | 0 | 0 |
| 118 | 120 | 1 | 0 | 0 | 0 | 0 |
| 118 | 121 | 1 | 0 | 0 | 0 | 0 |
| 121 | 122 | 1 | 0 | 0 | 0 | 0 |
| 121 | 123 | 1 | 0 | 0 | 0 | 0 |
| 121 | 124 | 1 | 0 | 0 | 0 | 0 |
| 124 | 137 | 1 | 0 | 0 | 0 | 0 |

|        |   |   |   |   |   |
|--------|---|---|---|---|---|
| 125126 | 1 | 0 | 0 | 0 | 0 |
| 125127 | 1 | 0 | 0 | 0 | 0 |
| 125128 | 1 | 0 | 0 | 0 | 0 |
| 125152 | 1 | 0 | 0 | 0 | 0 |
| 128129 | 1 | 0 | 0 | 0 | 0 |
| 129130 | 1 | 0 | 0 | 0 | 0 |
| 129136 | 2 | 0 | 0 | 0 | 0 |
| 130131 | 1 | 0 | 0 | 0 | 0 |
| 130132 | 1 | 0 | 0 | 0 | 0 |
| 130133 | 1 | 0 | 0 | 0 | 0 |
| 133134 | 1 | 0 | 0 | 0 | 0 |
| 133135 | 1 | 0 | 0 | 0 | 0 |
| 133175 | 1 | 0 | 0 | 0 | 0 |
| 137138 | 1 | 0 | 0 | 0 | 0 |
| 137139 | 1 | 0 | 0 | 0 | 0 |
| 137140 | 1 | 0 | 0 | 0 | 0 |
| 140141 | 1 | 0 | 0 | 0 | 0 |
| 140142 | 1 | 0 | 0 | 0 | 0 |
| 140143 | 1 | 0 | 0 | 0 | 0 |
| 143144 | 1 | 0 | 0 | 0 | 0 |
| 143151 | 2 | 0 | 0 | 0 | 0 |
| 144145 | 1 | 0 | 0 | 0 | 0 |
| 145146 | 1 | 0 | 0 | 0 | 0 |
| 145147 | 1 | 0 | 0 | 0 | 0 |
| 145148 | 1 | 0 | 0 | 0 | 0 |
| 148149 | 1 | 0 | 0 | 0 | 0 |
| 148150 | 1 | 0 | 0 | 0 | 0 |
| 148152 | 1 | 0 | 0 | 0 | 0 |
| 152153 | 1 | 0 | 0 | 0 | 0 |
| 152154 | 1 | 0 | 0 | 0 | 0 |
| 155156 | 1 | 0 | 0 | 0 | 0 |
| 155157 | 1 | 0 | 0 | 0 | 0 |
| 157158 | 1 | 0 | 0 | 0 | 0 |
| 157159 | 1 | 0 | 0 | 0 | 0 |
| 157160 | 1 | 0 | 0 | 0 | 0 |
| 160161 | 1 | 0 | 0 | 0 | 0 |
| 160162 | 1 | 0 | 0 | 0 | 0 |
| 160163 | 1 | 0 | 0 | 0 | 0 |
| 163164 | 1 | 0 | 0 | 0 | 0 |
| 163165 | 1 | 0 | 0 | 0 | 0 |
| 163166 | 1 | 0 | 0 | 0 | 0 |
| 166167 | 1 | 0 | 0 | 0 | 0 |
| 166168 | 1 | 0 | 0 | 0 | 0 |
| 166169 | 1 | 0 | 0 | 0 | 0 |
| 169170 | 1 | 0 | 0 | 0 | 0 |
| 169171 | 1 | 0 | 0 | 0 | 0 |
| 169172 | 1 | 0 | 0 | 0 | 0 |
| 172173 | 1 | 0 | 0 | 0 | 0 |
| 172174 | 1 | 0 | 0 | 0 | 0 |
| 172175 | 1 | 0 | 0 | 0 | 0 |
| 175188 | 1 | 0 | 0 | 0 | 0 |
| 176177 | 1 | 0 | 0 | 0 | 0 |
| 176178 | 1 | 0 | 0 | 0 | 0 |
| 176179 | 1 | 0 | 0 | 0 | 0 |
| 176203 | 1 | 0 | 0 | 0 | 0 |
| 179180 | 1 | 0 | 0 | 0 | 0 |
| 180181 | 1 | 0 | 0 | 0 | 0 |
| 180187 | 2 | 0 | 0 | 0 | 0 |
| 181182 | 1 | 0 | 0 | 0 | 0 |
| 181183 | 1 | 0 | 0 | 0 | 0 |
| 181184 | 1 | 0 | 0 | 0 | 0 |
| 184185 | 1 | 0 | 0 | 0 | 0 |
| 184186 | 1 | 0 | 0 | 0 | 0 |
| 184226 | 1 | 0 | 0 | 0 | 0 |
| 188189 | 1 | 0 | 0 | 0 | 0 |
| 188190 | 1 | 0 | 0 | 0 | 0 |
| 188191 | 1 | 0 | 0 | 0 | 0 |
| 191192 | 1 | 0 | 0 | 0 | 0 |
| 191193 | 1 | 0 | 0 | 0 | 0 |
| 191194 | 1 | 0 | 0 | 0 | 0 |
| 194195 | 1 | 0 | 0 | 0 | 0 |
| 194202 | 2 | 0 | 0 | 0 | 0 |
| 195196 | 1 | 0 | 0 | 0 | 0 |
| 196197 | 1 | 0 | 0 | 0 | 0 |
| 196198 | 1 | 0 | 0 | 0 | 0 |
| 196199 | 1 | 0 | 0 | 0 | 0 |
| 199200 | 1 | 0 | 0 | 0 | 0 |
| 199201 | 1 | 0 | 0 | 0 | 0 |
| 199203 | 1 | 0 | 0 | 0 | 0 |
| 203204 | 1 | 0 | 0 | 0 | 0 |
| 203205 | 1 | 0 | 0 | 0 | 0 |

```

206207 1 0 0 0 0
206208 1 0 0 0 0
208209 1 0 0 0 0
208210 1 0 0 0 0
208211 1 0 0 0 0
211212 1 0 0 0 0
211213 1 0 0 0 0
211214 1 0 0 0 0
214215 1 0 0 0 0
214216 1 0 0 0 0
214217 1 0 0 0 0
217218 1 0 0 0 0
217219 1 0 0 0 0
217220 1 0 0 0 0
220221 1 0 0 0 0
220222 1 0 0 0 0
220223 1 0 0 0 0
223224 1 0 0 0 0
223225 1 0 0 0 0
223226 1 0 0 0 0
226240 1 0 0 0 0
227228 1 0 0 0 0
227229 1 0 0 0 0
227230 1 0 0 0 0
227255 1 0 0 0 0
230231 1 0 0 0 0
231232 1 0 0 0 0
231239 2 0 0 0 0
232233 1 0 0 0 0
232234 1 0 0 0 0
232235 1 0 0 0 0
235236 1 0 0 0 0
235237 1 0 0 0 0
235238 1 0 0 0 0
240241 1 0 0 0 0
240242 1 0 0 0 0
240243 1 0 0 0 0
243244 1 0 0 0 0
243245 1 0 0 0 0
243246 1 0 0 0 0
246247 1 0 0 0 0
246254 2 0 0 0 0
247248 1 0 0 0 0
248249 1 0 0 0 0
248250 1 0 0 0 0
248251 1 0 0 0 0
251252 1 0 0 0 0
251253 1 0 0 0 0
251255 1 0 0 0 0
255256 1 0 0 0 0
255257 1 0 0 0 0

```

```

M END
> <NAME>
C36_1

```

```

$$$$
C75_1
MOE2012 3D

```

```

262261 0 0 1 0 0 0 0 0999 V2000
40.6880 23.1630 -19.2190 C 0 0 0 0 0 0 0 0 0 0 0 0 0 0 0
39.6200 23.0090 -19.4100 H 0 0 0 0 0 0 0 0 0 0 0 0 0 0 0
41.2500 22.7520 -20.0630 H 0 0 0 0 0 0 0 0 0 0 0 0 0 0 0
40.8710 24.2420 -19.1960 H 0 0 0 0 0 0 0 0 0 0 0 0 0 0 0
41.1020 22.5370 -17.8900 C 0 0 0 0 0 0 0 0 0 0 0 0 0 0 0
42.1730 22.6990 -17.7140 H 0 0 0 0 0 0 0 0 0 0 0 0 0 0 0
40.5640 23.0880 -17.1080 H 0 0 0 0 0 0 0 0 0 0 0 0 0 0 0
40.7610 21.1060 -17.8070 N 0 0 0 0 0 0 0 0 0 0 0 0 0 0 0
40.8780 20.6380 -16.4090 C 0 0 0 0 0 0 0 0 0 0 0 0 0 0 0
41.9320 20.6120 -16.1000 H 0 0 0 0 0 0 0 0 0 0 0 0 0 0 0
40.3720 21.3530 -15.7470 H 0 0 0 0 0 0 0 0 0 0 0 0 0 0 0
40.2140 19.2630 -16.1730 C 0 0 0 0 0 0 0 0 0 0 0 0 0 0 0
39.1570 19.3270 -16.4580 H 0 0 0 0 0 0 0 0 0 0 0 0 0 0 0
40.6870 18.4970 -16.7980 H 0 0 0 0 0 0 0 0 0 0 0 0 0 0 0
40.3230 18.8690 -14.7600 N 0 0 3 0 0 0 0 0 0 0 0 0 0 0 0
41.3080 18.8090 -14.5020 H 0 0 0 0 0 0 0 0 0 0 0 0 0 0 0
41.5690 20.2900 -18.7300 C 0 0 0 0 0 0 0 0 0 0 0 0 0 0 0
42.3180 20.8860 -19.2640 H 0 0 0 0 0 0 0 0 0 0 0 0 0 0 0
42.1470 19.5190 -18.2050 H 0 0 0 0 0 0 0 0 0 0 0 0 0 0 0
40.6580 19.6150 -19.7470 C 0 0 0 0 0 0 0 0 0 0 0 0 0 0 0
40.1070 20.3520 -20.3410 H 0 0 0 0 0 0 0 0 0 0 0 0 0 0 0

```







|         |         |         |   |   |   |   |   |   |   |   |   |   |   |   |
|---------|---------|---------|---|---|---|---|---|---|---|---|---|---|---|---|
| 43.7270 | 1.4720  | 16.6700 | C | 0 | 0 | 0 | 0 | 0 | 0 | 0 | 0 | 0 | 0 | 0 |
| 44.4390 | 2.2710  | 17.7340 | C | 0 | 0 | 0 | 0 | 0 | 0 | 0 | 0 | 0 | 0 | 0 |
| 44.8630 | 1.5700  | 18.4610 | H | 0 | 0 | 0 | 0 | 0 | 0 | 0 | 0 | 0 | 0 | 0 |
| 45.2590 | 2.8110  | 17.2510 | H | 0 | 0 | 0 | 0 | 0 | 0 | 0 | 0 | 0 | 0 | 0 |
| 43.4710 | 3.2410  | 18.4250 | C | 0 | 0 | 0 | 0 | 0 | 0 | 0 | 0 | 0 | 0 | 0 |
| 42.9560 | 3.8710  | 17.6880 | H | 0 | 0 | 0 | 0 | 0 | 0 | 0 | 0 | 0 | 0 | 0 |
| 42.6920 | 2.6330  | 18.9000 | H | 0 | 0 | 0 | 0 | 0 | 0 | 0 | 0 | 0 | 0 | 0 |
| 42.5160 | 1.3170  | 16.6030 | O | 0 | 0 | 0 | 0 | 0 | 0 | 0 | 0 | 0 | 0 | 0 |
| 46.3040 | -3.8440 | 7.4810  | C | 0 | 0 | 0 | 0 | 0 | 0 | 0 | 0 | 0 | 0 | 0 |
| 47.1430 | -4.3900 | 7.9290  | H | 0 | 0 | 0 | 0 | 0 | 0 | 0 | 0 | 0 | 0 | 0 |
| 46.7440 | -2.9600 | 7.0020  | H | 0 | 0 | 0 | 0 | 0 | 0 | 0 | 0 | 0 | 0 | 0 |
| 45.3640 | -3.4450 | 8.6210  | C | 0 | 0 | 0 | 0 | 0 | 0 | 0 | 0 | 0 | 0 | 0 |
| 44.5210 | -2.8520 | 8.2530  | H | 0 | 0 | 0 | 0 | 0 | 0 | 0 | 0 | 0 | 0 | 0 |
| 44.9780 | -4.3440 | 9.1160  | H | 0 | 0 | 0 | 0 | 0 | 0 | 0 | 0 | 0 | 0 | 0 |
| 46.0880 | -2.6170 | 9.6490  | C | 0 | 0 | 0 | 0 | 0 | 0 | 0 | 0 | 0 | 0 | 0 |
| 45.2220 | -2.2900 | 10.6500 | O | 0 | 0 | 0 | 0 | 0 | 0 | 0 | 0 | 0 | 0 | 0 |
| 45.7940 | -1.4890 | 11.6910 | C | 0 | 0 | 0 | 0 | 0 | 0 | 0 | 0 | 0 | 0 | 0 |
| 46.5680 | -2.0680 | 12.2080 | H | 0 | 0 | 0 | 0 | 0 | 0 | 0 | 0 | 0 | 0 | 0 |
| 46.2380 | -0.5830 | 11.2610 | H | 0 | 0 | 0 | 0 | 0 | 0 | 0 | 0 | 0 | 0 | 0 |
| 44.6790 | -1.1140 | 12.6590 | C | 0 | 0 | 0 | 0 | 0 | 0 | 0 | 0 | 0 | 0 | 0 |
| 43.8930 | -0.5760 | 12.1130 | H | 0 | 0 | 0 | 0 | 0 | 0 | 0 | 0 | 0 | 0 | 0 |
| 44.2060 | -2.0270 | 13.0420 | H | 0 | 0 | 0 | 0 | 0 | 0 | 0 | 0 | 0 | 0 | 0 |
| 47.2630 | -2.2850 | 9.5930  | O | 0 | 0 | 0 | 0 | 0 | 0 | 0 | 0 | 0 | 0 | 0 |
| 45.1970 | -0.2640 | 13.8130 | C | 0 | 0 | 0 | 0 | 0 | 0 | 0 | 0 | 0 | 0 | 0 |
| 45.6950 | 0.6350  | 13.4300 | H | 0 | 0 | 0 | 0 | 0 | 0 | 0 | 0 | 0 | 0 | 0 |
| 45.9600 | -0.8130 | 14.3770 | H | 0 | 0 | 0 | 0 | 0 | 0 | 0 | 0 | 0 | 0 | 0 |
| 48.3880 | 8.6370  | 19.5790 | C | 0 | 0 | 0 | 0 | 0 | 0 | 0 | 0 | 0 | 0 | 0 |
| 47.6060 | 9.3350  | 19.2610 | H | 0 | 0 | 0 | 0 | 0 | 0 | 0 | 0 | 0 | 0 | 0 |
| 49.0830 | 8.4950  | 18.7460 | H | 0 | 0 | 0 | 0 | 0 | 0 | 0 | 0 | 0 | 0 | 0 |
| 48.9450 | 9.1090  | 20.3950 | H | 0 | 0 | 0 | 0 | 0 | 0 | 0 | 0 | 0 | 0 | 0 |
| 47.7840 | 7.3190  | 20.0580 | C | 0 | 0 | 0 | 0 | 0 | 0 | 0 | 0 | 0 | 0 | 0 |
| 48.5800 | 6.6320  | 20.3700 | H | 0 | 0 | 0 | 0 | 0 | 0 | 0 | 0 | 0 | 0 | 0 |
| 47.1990 | 7.5570  | 20.9550 | H | 0 | 0 | 0 | 0 | 0 | 0 | 0 | 0 | 0 | 0 | 0 |
| 46.9080 | 6.6950  | 19.0510 | N | 0 | 0 | 0 | 0 | 0 | 0 | 0 | 0 | 0 | 0 | 0 |
| 46.1200 | 5.6080  | 19.6710 | C | 0 | 0 | 0 | 0 | 0 | 0 | 0 | 0 | 0 | 0 | 0 |
| 46.7640 | 4.7470  | 19.8970 | H | 0 | 0 | 0 | 0 | 0 | 0 | 0 | 0 | 0 | 0 | 0 |
| 45.7230 | 5.9620  | 20.6290 | H | 0 | 0 | 0 | 0 | 0 | 0 | 0 | 0 | 0 | 0 | 0 |
| 44.9230 | 5.1660  | 18.7950 | C | 0 | 0 | 0 | 0 | 0 | 0 | 0 | 0 | 0 | 0 | 0 |
| 44.2720 | 6.0220  | 18.5700 | H | 0 | 0 | 0 | 0 | 0 | 0 | 0 | 0 | 0 | 0 | 0 |
| 45.3150 | 4.8330  | 17.8300 | H | 0 | 0 | 0 | 0 | 0 | 0 | 0 | 0 | 0 | 0 | 0 |
| 44.1530 | 4.0740  | 19.4400 | N | 0 | 0 | 3 | 0 | 0 | 0 | 0 | 0 | 0 | 0 | 0 |
| 47.6670 | 6.2230  | 17.8790 | C | 0 | 0 | 0 | 0 | 0 | 0 | 0 | 0 | 0 | 0 | 0 |
| 48.7490 | 6.3430  | 18.0100 | H | 0 | 0 | 0 | 0 | 0 | 0 | 0 | 0 | 0 | 0 | 0 |
| 47.5250 | 5.1510  | 17.6960 | H | 0 | 0 | 0 | 0 | 0 | 0 | 0 | 0 | 0 | 0 | 0 |
| 47.2270 | 6.9940  | 16.6410 | C | 0 | 0 | 0 | 0 | 0 | 0 | 0 | 0 | 0 | 0 | 0 |
| 47.4120 | 8.0670  | 16.7500 | H | 0 | 0 | 0 | 0 | 0 | 0 | 0 | 0 | 0 | 0 | 0 |
| 46.1610 | 6.8490  | 16.4390 | H | 0 | 0 | 0 | 0 | 0 | 0 | 0 | 0 | 0 | 0 | 0 |
| 47.7840 | 6.6460  | 15.7650 | H | 0 | 0 | 0 | 0 | 0 | 0 | 0 | 0 | 0 | 0 | 0 |
| 40.0060 | 2.3790  | 28.0510 | C | 0 | 0 | 0 | 0 | 0 | 0 | 0 | 0 | 0 | 0 | 0 |
| 41.0110 | 2.1660  | 28.4330 | H | 0 | 0 | 0 | 0 | 0 | 0 | 0 | 0 | 0 | 0 | 0 |
| 39.5530 | 1.4570  | 27.6690 | H | 0 | 0 | 0 | 0 | 0 | 0 | 0 | 0 | 0 | 0 | 0 |
| 39.1950 | 2.9060  | 29.1100 | O | 0 | 0 | 0 | 0 | 0 | 0 | 0 | 0 | 0 | 0 | 0 |
| 39.0400 | 2.0660  | 30.1740 | C | 0 | 0 | 0 | 0 | 0 | 0 | 0 | 0 | 0 | 0 | 0 |
| 38.1710 | 2.7330  | 31.2130 | C | 0 | 0 | 0 | 0 | 0 | 0 | 0 | 0 | 0 | 0 | 0 |
| 38.6570 | 3.6630  | 31.5260 | H | 0 | 0 | 0 | 0 | 0 | 0 | 0 | 0 | 0 | 0 | 0 |
| 37.2050 | 2.9700  | 30.7550 | H | 0 | 0 | 0 | 0 | 0 | 0 | 0 | 0 | 0 | 0 | 0 |
| 37.9490 | 1.8470  | 32.4260 | C | 0 | 0 | 0 | 0 | 0 | 0 | 0 | 0 | 0 | 0 | 0 |
| 37.4590 | 0.9090  | 32.1440 | H | 0 | 0 | 0 | 0 | 0 | 0 | 0 | 0 | 0 | 0 | 0 |
| 37.3160 | 2.3560  | 33.1590 | H | 0 | 0 | 0 | 0 | 0 | 0 | 0 | 0 | 0 | 0 | 0 |
| 38.8990 | 1.5960  | 32.9090 | H | 0 | 0 | 0 | 0 | 0 | 0 | 0 | 0 | 0 | 0 | 0 |
| 39.5300 | 0.9490  | 30.2680 | O | 0 | 0 | 0 | 0 | 0 | 0 | 0 | 0 | 0 | 0 | 0 |
| 43.1770 | 4.6470  | 20.3960 | C | 0 | 0 | 0 | 0 | 0 | 0 | 0 | 0 | 0 | 0 | 0 |
| 43.6110 | 5.5170  | 20.9050 | H | 0 | 0 | 0 | 0 | 0 | 0 | 0 | 0 | 0 | 0 | 0 |
| 42.2890 | 5.0240  | 19.8690 | H | 0 | 0 | 0 | 0 | 0 | 0 | 0 | 0 | 0 | 0 | 0 |
| 42.7800 | 3.6440  | 21.4820 | C | 0 | 0 | 0 | 0 | 0 | 0 | 0 | 0 | 0 | 0 | 0 |
| 42.2140 | 2.8060  | 21.0650 | H | 0 | 0 | 0 | 0 | 0 | 0 | 0 | 0 | 0 | 0 | 0 |
| 43.6830 | 3.2600  | 21.9710 | H | 0 | 0 | 0 | 0 | 0 | 0 | 0 | 0 | 0 | 0 | 0 |
| 41.9220 | 4.3070  | 22.5330 | C | 0 | 0 | 0 | 0 | 0 | 0 | 0 | 0 | 0 | 0 | 0 |
| 41.7890 | 3.4740  | 23.6040 | O | 0 | 0 | 0 | 0 | 0 | 0 | 0 | 0 | 0 | 0 | 0 |
| 40.9830 | 3.9990  | 24.6670 | C | 0 | 0 | 0 | 0 | 0 | 0 | 0 | 0 | 0 | 0 | 0 |
| 41.4370 | 4.9220  | 25.0470 | H | 0 | 0 | 0 | 0 | 0 | 0 | 0 | 0 | 0 | 0 | 0 |
| 39.9760 | 4.2120  | 24.2910 | H | 0 | 0 | 0 | 0 | 0 | 0 | 0 | 0 | 0 | 0 | 0 |
| 40.9190 | 2.9510  | 25.7720 | C | 0 | 0 | 0 | 0 | 0 | 0 | 0 | 0 | 0 | 0 | 0 |
| 40.5120 | 2.0180  | 25.3640 | H | 0 | 0 | 0 | 0 | 0 | 0 | 0 | 0 | 0 | 0 | 0 |
| 41.9370 | 2.7140  | 26.1070 | H | 0 | 0 | 0 | 0 | 0 | 0 | 0 | 0 | 0 | 0 | 0 |
| 41.4120 | 5.4150  | 22.4360 | O | 0 | 0 | 0 | 0 | 0 | 0 | 0 | 0 | 0 | 0 | 0 |
| 40.0740 | 3.4270  | 26.9470 | C | 0 | 0 | 0 | 0 | 0 | 0 | 0 | 0 | 0 | 0 | 0 |
| 39.0570 | 3.6670  | 26.6120 | H | 0 | 0 | 0 | 0 | 0 | 0 | 0 | 0 | 0 | 0 | 0 |
| 40.4830 | 4.3600  | 27.3570 | H | 0 | 0 | 0 | 0 | 0 | 0 | 0 | 0 | 0 | 0 | 0 |
| 1       | 2       | 1       | 0 | 0 | 0 | 0 | 0 | 0 | 0 | 0 | 0 | 0 | 0 | 0 |
| 1       | 3       | 1       | 0 | 0 | 0 | 0 | 0 | 0 | 0 | 0 | 0 | 0 | 0 | 0 |

|    |     |   |   |   |   |   |
|----|-----|---|---|---|---|---|
| 1  | 4   | 1 | 0 | 0 | 0 | 0 |
| 1  | 5   | 1 | 0 | 0 | 0 | 0 |
| 5  | 6   | 1 | 0 | 0 | 0 | 0 |
| 5  | 7   | 1 | 0 | 0 | 0 | 0 |
| 5  | 8   | 1 | 0 | 0 | 0 | 0 |
| 8  | 9   | 1 | 0 | 0 | 0 | 0 |
| 8  | 17  | 1 | 0 | 0 | 0 | 0 |
| 9  | 10  | 1 | 0 | 0 | 0 | 0 |
| 9  | 11  | 1 | 0 | 0 | 0 | 0 |
| 9  | 12  | 1 | 0 | 0 | 0 | 0 |
| 12 | 13  | 1 | 0 | 0 | 0 | 0 |
| 12 | 14  | 1 | 0 | 0 | 0 | 0 |
| 12 | 15  | 1 | 0 | 0 | 0 | 0 |
| 15 | 16  | 1 | 0 | 0 | 0 | 0 |
| 15 | 36  | 1 | 0 | 0 | 0 | 0 |
| 17 | 18  | 1 | 0 | 0 | 0 | 0 |
| 17 | 19  | 1 | 0 | 0 | 0 | 0 |
| 17 | 20  | 1 | 0 | 0 | 0 | 0 |
| 20 | 21  | 1 | 0 | 0 | 0 | 0 |
| 20 | 22  | 1 | 0 | 0 | 0 | 0 |
| 20 | 23  | 1 | 0 | 0 | 0 | 0 |
| 24 | 25  | 1 | 0 | 0 | 0 | 0 |
| 24 | 26  | 1 | 0 | 0 | 0 | 0 |
| 24 | 27  | 1 | 0 | 0 | 0 | 0 |
| 24 | 51  | 1 | 0 | 0 | 0 | 0 |
| 27 | 28  | 1 | 0 | 0 | 0 | 0 |
| 28 | 29  | 1 | 0 | 0 | 0 | 0 |
| 28 | 35  | 2 | 0 | 0 | 0 | 0 |
| 29 | 30  | 1 | 0 | 0 | 0 | 0 |
| 29 | 31  | 1 | 0 | 0 | 0 | 0 |
| 29 | 32  | 1 | 0 | 0 | 0 | 0 |
| 32 | 33  | 1 | 0 | 0 | 0 | 0 |
| 32 | 34  | 1 | 0 | 0 | 0 | 0 |
| 32 | 68  | 1 | 0 | 0 | 0 | 0 |
| 36 | 37  | 1 | 0 | 0 | 0 | 0 |
| 36 | 38  | 1 | 0 | 0 | 0 | 0 |
| 36 | 39  | 1 | 0 | 0 | 0 | 0 |
| 39 | 40  | 1 | 0 | 0 | 0 | 0 |
| 39 | 41  | 1 | 0 | 0 | 0 | 0 |
| 39 | 42  | 1 | 0 | 0 | 0 | 0 |
| 42 | 43  | 1 | 0 | 0 | 0 | 0 |
| 42 | 50  | 2 | 0 | 0 | 0 | 0 |
| 43 | 44  | 1 | 0 | 0 | 0 | 0 |
| 44 | 45  | 1 | 0 | 0 | 0 | 0 |
| 44 | 46  | 1 | 0 | 0 | 0 | 0 |
| 44 | 47  | 1 | 0 | 0 | 0 | 0 |
| 47 | 48  | 1 | 0 | 0 | 0 | 0 |
| 47 | 49  | 1 | 0 | 0 | 0 | 0 |
| 47 | 51  | 1 | 0 | 0 | 0 | 0 |
| 51 | 52  | 1 | 0 | 0 | 0 | 0 |
| 51 | 53  | 1 | 0 | 0 | 0 | 0 |
| 54 | 55  | 1 | 0 | 0 | 0 | 0 |
| 54 | 56  | 1 | 0 | 0 | 0 | 0 |
| 54 | 57  | 1 | 0 | 0 | 0 | 0 |
| 54 | 58  | 1 | 0 | 0 | 0 | 0 |
| 58 | 59  | 1 | 0 | 0 | 0 | 0 |
| 58 | 60  | 1 | 0 | 0 | 0 | 0 |
| 58 | 61  | 1 | 0 | 0 | 0 | 0 |
| 61 | 62  | 1 | 0 | 0 | 0 | 0 |
| 61 | 69  | 1 | 0 | 0 | 0 | 0 |
| 62 | 63  | 1 | 0 | 0 | 0 | 0 |
| 62 | 64  | 1 | 0 | 0 | 0 | 0 |
| 62 | 65  | 1 | 0 | 0 | 0 | 0 |
| 65 | 66  | 1 | 0 | 0 | 0 | 0 |
| 65 | 67  | 1 | 0 | 0 | 0 | 0 |
| 65 | 68  | 1 | 0 | 0 | 0 | 0 |
| 68 | 88  | 1 | 0 | 0 | 0 | 0 |
| 69 | 70  | 1 | 0 | 0 | 0 | 0 |
| 69 | 71  | 1 | 0 | 0 | 0 | 0 |
| 69 | 72  | 1 | 0 | 0 | 0 | 0 |
| 72 | 73  | 1 | 0 | 0 | 0 | 0 |
| 72 | 74  | 1 | 0 | 0 | 0 | 0 |
| 72 | 75  | 1 | 0 | 0 | 0 | 0 |
| 76 | 77  | 1 | 0 | 0 | 0 | 0 |
| 76 | 78  | 1 | 0 | 0 | 0 | 0 |
| 76 | 79  | 1 | 0 | 0 | 0 | 0 |
| 76 | 103 | 1 | 0 | 0 | 0 | 0 |
| 79 | 80  | 1 | 0 | 0 | 0 | 0 |
| 80 | 81  | 1 | 0 | 0 | 0 | 0 |
| 80 | 87  | 2 | 0 | 0 | 0 | 0 |
| 81 | 82  | 1 | 0 | 0 | 0 | 0 |

|     |     |   |   |   |   |   |
|-----|-----|---|---|---|---|---|
| 81  | 83  | 1 | 0 | 0 | 0 | 0 |
| 81  | 84  | 1 | 0 | 0 | 0 | 0 |
| 84  | 85  | 1 | 0 | 0 | 0 | 0 |
| 84  | 86  | 1 | 0 | 0 | 0 | 0 |
| 84  | 120 | 1 | 0 | 0 | 0 | 0 |
| 88  | 89  | 1 | 0 | 0 | 0 | 0 |
| 88  | 90  | 1 | 0 | 0 | 0 | 0 |
| 88  | 91  | 1 | 0 | 0 | 0 | 0 |
| 91  | 92  | 1 | 0 | 0 | 0 | 0 |
| 91  | 93  | 1 | 0 | 0 | 0 | 0 |
| 91  | 94  | 1 | 0 | 0 | 0 | 0 |
| 94  | 95  | 1 | 0 | 0 | 0 | 0 |
| 94  | 102 | 2 | 0 | 0 | 0 | 0 |
| 95  | 96  | 1 | 0 | 0 | 0 | 0 |
| 96  | 97  | 1 | 0 | 0 | 0 | 0 |
| 96  | 98  | 1 | 0 | 0 | 0 | 0 |
| 96  | 99  | 1 | 0 | 0 | 0 | 0 |
| 99  | 100 | 1 | 0 | 0 | 0 | 0 |
| 99  | 101 | 1 | 0 | 0 | 0 | 0 |
| 99  | 103 | 1 | 0 | 0 | 0 | 0 |
| 103 | 104 | 1 | 0 | 0 | 0 | 0 |
| 103 | 105 | 1 | 0 | 0 | 0 | 0 |
| 106 | 107 | 1 | 0 | 0 | 0 | 0 |
| 106 | 108 | 1 | 0 | 0 | 0 | 0 |
| 106 | 109 | 1 | 0 | 0 | 0 | 0 |
| 106 | 110 | 1 | 0 | 0 | 0 | 0 |
| 110 | 111 | 1 | 0 | 0 | 0 | 0 |
| 110 | 112 | 1 | 0 | 0 | 0 | 0 |
| 110 | 113 | 1 | 0 | 0 | 0 | 0 |
| 113 | 114 | 1 | 0 | 0 | 0 | 0 |
| 113 | 121 | 1 | 0 | 0 | 0 | 0 |
| 114 | 115 | 1 | 0 | 0 | 0 | 0 |
| 114 | 116 | 1 | 0 | 0 | 0 | 0 |
| 114 | 117 | 1 | 0 | 0 | 0 | 0 |
| 117 | 118 | 1 | 0 | 0 | 0 | 0 |
| 117 | 119 | 1 | 0 | 0 | 0 | 0 |
| 117 | 120 | 1 | 0 | 0 | 0 | 0 |
| 120 | 140 | 1 | 0 | 0 | 0 | 0 |
| 121 | 122 | 1 | 0 | 0 | 0 | 0 |
| 121 | 123 | 1 | 0 | 0 | 0 | 0 |
| 121 | 124 | 1 | 0 | 0 | 0 | 0 |
| 124 | 125 | 1 | 0 | 0 | 0 | 0 |
| 124 | 126 | 1 | 0 | 0 | 0 | 0 |
| 124 | 127 | 1 | 0 | 0 | 0 | 0 |
| 128 | 129 | 1 | 0 | 0 | 0 | 0 |
| 128 | 130 | 1 | 0 | 0 | 0 | 0 |
| 128 | 131 | 1 | 0 | 0 | 0 | 0 |
| 128 | 155 | 1 | 0 | 0 | 0 | 0 |
| 131 | 132 | 1 | 0 | 0 | 0 | 0 |
| 132 | 133 | 1 | 0 | 0 | 0 | 0 |
| 132 | 139 | 2 | 0 | 0 | 0 | 0 |
| 133 | 134 | 1 | 0 | 0 | 0 | 0 |
| 133 | 135 | 1 | 0 | 0 | 0 | 0 |
| 133 | 136 | 1 | 0 | 0 | 0 | 0 |
| 136 | 137 | 1 | 0 | 0 | 0 | 0 |
| 136 | 138 | 1 | 0 | 0 | 0 | 0 |
| 136 | 172 | 1 | 0 | 0 | 0 | 0 |
| 140 | 141 | 1 | 0 | 0 | 0 | 0 |
| 140 | 142 | 1 | 0 | 0 | 0 | 0 |
| 140 | 143 | 1 | 0 | 0 | 0 | 0 |
| 143 | 144 | 1 | 0 | 0 | 0 | 0 |
| 143 | 145 | 1 | 0 | 0 | 0 | 0 |
| 143 | 146 | 1 | 0 | 0 | 0 | 0 |
| 146 | 147 | 1 | 0 | 0 | 0 | 0 |
| 146 | 154 | 2 | 0 | 0 | 0 | 0 |
| 147 | 148 | 1 | 0 | 0 | 0 | 0 |
| 148 | 149 | 1 | 0 | 0 | 0 | 0 |
| 148 | 150 | 1 | 0 | 0 | 0 | 0 |
| 148 | 151 | 1 | 0 | 0 | 0 | 0 |
| 151 | 152 | 1 | 0 | 0 | 0 | 0 |
| 151 | 153 | 1 | 0 | 0 | 0 | 0 |
| 151 | 155 | 1 | 0 | 0 | 0 | 0 |
| 155 | 156 | 1 | 0 | 0 | 0 | 0 |
| 155 | 157 | 1 | 0 | 0 | 0 | 0 |
| 158 | 159 | 1 | 0 | 0 | 0 | 0 |
| 158 | 160 | 1 | 0 | 0 | 0 | 0 |
| 158 | 161 | 1 | 0 | 0 | 0 | 0 |
| 158 | 162 | 1 | 0 | 0 | 0 | 0 |
| 162 | 163 | 1 | 0 | 0 | 0 | 0 |
| 162 | 164 | 1 | 0 | 0 | 0 | 0 |
| 162 | 165 | 1 | 0 | 0 | 0 | 0 |

|        |   |   |   |   |   |
|--------|---|---|---|---|---|
| 165166 | 1 | 0 | 0 | 0 | 0 |
| 165173 | 1 | 0 | 0 | 0 | 0 |
| 166167 | 1 | 0 | 0 | 0 | 0 |
| 166168 | 1 | 0 | 0 | 0 | 0 |
| 166169 | 1 | 0 | 0 | 0 | 0 |
| 169170 | 1 | 0 | 0 | 0 | 0 |
| 169171 | 1 | 0 | 0 | 0 | 0 |
| 169172 | 1 | 0 | 0 | 0 | 0 |
| 172192 | 1 | 0 | 0 | 0 | 0 |
| 173174 | 1 | 0 | 0 | 0 | 0 |
| 173175 | 1 | 0 | 0 | 0 | 0 |
| 173176 | 1 | 0 | 0 | 0 | 0 |
| 176177 | 1 | 0 | 0 | 0 | 0 |
| 176178 | 1 | 0 | 0 | 0 | 0 |
| 176179 | 1 | 0 | 0 | 0 | 0 |
| 180181 | 1 | 0 | 0 | 0 | 0 |
| 180182 | 1 | 0 | 0 | 0 | 0 |
| 180183 | 1 | 0 | 0 | 0 | 0 |
| 180207 | 1 | 0 | 0 | 0 | 0 |
| 183184 | 1 | 0 | 0 | 0 | 0 |
| 184185 | 1 | 0 | 0 | 0 | 0 |
| 184191 | 2 | 0 | 0 | 0 | 0 |
| 185186 | 1 | 0 | 0 | 0 | 0 |
| 185187 | 1 | 0 | 0 | 0 | 0 |
| 185188 | 1 | 0 | 0 | 0 | 0 |
| 188189 | 1 | 0 | 0 | 0 | 0 |
| 188190 | 1 | 0 | 0 | 0 | 0 |
| 188224 | 1 | 0 | 0 | 0 | 0 |
| 192193 | 1 | 0 | 0 | 0 | 0 |
| 192194 | 1 | 0 | 0 | 0 | 0 |
| 192195 | 1 | 0 | 0 | 0 | 0 |
| 195196 | 1 | 0 | 0 | 0 | 0 |
| 195197 | 1 | 0 | 0 | 0 | 0 |
| 195198 | 1 | 0 | 0 | 0 | 0 |
| 198199 | 1 | 0 | 0 | 0 | 0 |
| 198206 | 2 | 0 | 0 | 0 | 0 |
| 199200 | 1 | 0 | 0 | 0 | 0 |
| 200201 | 1 | 0 | 0 | 0 | 0 |
| 200202 | 1 | 0 | 0 | 0 | 0 |
| 200203 | 1 | 0 | 0 | 0 | 0 |
| 203204 | 1 | 0 | 0 | 0 | 0 |
| 203205 | 1 | 0 | 0 | 0 | 0 |
| 203207 | 1 | 0 | 0 | 0 | 0 |
| 207208 | 1 | 0 | 0 | 0 | 0 |
| 207209 | 1 | 0 | 0 | 0 | 0 |
| 210211 | 1 | 0 | 0 | 0 | 0 |
| 210212 | 1 | 0 | 0 | 0 | 0 |
| 210213 | 1 | 0 | 0 | 0 | 0 |
| 210214 | 1 | 0 | 0 | 0 | 0 |
| 214215 | 1 | 0 | 0 | 0 | 0 |
| 214216 | 1 | 0 | 0 | 0 | 0 |
| 214217 | 1 | 0 | 0 | 0 | 0 |
| 217218 | 1 | 0 | 0 | 0 | 0 |
| 217225 | 1 | 0 | 0 | 0 | 0 |
| 218219 | 1 | 0 | 0 | 0 | 0 |
| 218220 | 1 | 0 | 0 | 0 | 0 |
| 218221 | 1 | 0 | 0 | 0 | 0 |
| 221222 | 1 | 0 | 0 | 0 | 0 |
| 221223 | 1 | 0 | 0 | 0 | 0 |
| 221224 | 1 | 0 | 0 | 0 | 0 |
| 224245 | 1 | 0 | 0 | 0 | 0 |
| 225226 | 1 | 0 | 0 | 0 | 0 |
| 225227 | 1 | 0 | 0 | 0 | 0 |
| 225228 | 1 | 0 | 0 | 0 | 0 |
| 228229 | 1 | 0 | 0 | 0 | 0 |
| 228230 | 1 | 0 | 0 | 0 | 0 |
| 228231 | 1 | 0 | 0 | 0 | 0 |
| 232233 | 1 | 0 | 0 | 0 | 0 |
| 232234 | 1 | 0 | 0 | 0 | 0 |
| 232235 | 1 | 0 | 0 | 0 | 0 |
| 232260 | 1 | 0 | 0 | 0 | 0 |
| 235236 | 1 | 0 | 0 | 0 | 0 |
| 236237 | 1 | 0 | 0 | 0 | 0 |
| 236244 | 2 | 0 | 0 | 0 | 0 |
| 237238 | 1 | 0 | 0 | 0 | 0 |
| 237239 | 1 | 0 | 0 | 0 | 0 |
| 237240 | 1 | 0 | 0 | 0 | 0 |
| 240241 | 1 | 0 | 0 | 0 | 0 |
| 240242 | 1 | 0 | 0 | 0 | 0 |
| 240243 | 1 | 0 | 0 | 0 | 0 |
| 245246 | 1 | 0 | 0 | 0 | 0 |

245247 1 0 0 0 0  
245248 1 0 0 0 0  
248249 1 0 0 0 0  
248250 1 0 0 0 0  
248251 1 0 0 0 0  
251252 1 0 0 0 0  
251259 2 0 0 0 0  
252253 1 0 0 0 0  
253254 1 0 0 0 0  
253255 1 0 0 0 0  
253256 1 0 0 0 0  
256257 1 0 0 0 0  
256258 1 0 0 0 0  
256260 1 0 0 0 0  
260261 1 0 0 0 0  
260262 1 0 0 0 0

M END  
> <NAME>  
C75\_1

\$\$\$\$  
C80\_1  
MOE2012 3D

247246 0 0 1 0 0 0 0 0999 V2000  
10.4170 24.0650 -10.4320 C 0 0 0 0 0 0 0 0 0 0 0 0 0 0 0  
9.6140 24.7670 -10.1800 H 0 0 0 0 0 0 0 0 0 0 0 0 0 0 0  
10.0840 23.4470 -11.2740 H 0 0 0 0 0 0 0 0 0 0 0 0 0 0 0  
11.2670 24.6710 -10.7620 H 0 0 0 0 0 0 0 0 0 0 0 0 0 0 0  
10.7810 23.2570 -9.2640 N 0 0 0 0 0 0 0 0 0 0 0 0 0 0 0  
11.9060 22.3610 -9.5990 C 0 0 0 0 0 0 0 0 0 0 0 0 0 0 0  
11.6000 21.6160 -10.3450 H 0 0 0 0 0 0 0 0 0 0 0 0 0 0 0  
12.7040 22.9600 -10.0570 H 0 0 0 0 0 0 0 0 0 0 0 0 0 0 0  
12.5090 21.6540 -8.3740 C 0 0 0 0 0 0 0 0 0 0 0 0 0 0 0  
12.7580 22.4020 -7.6100 H 0 0 0 0 0 0 0 0 0 0 0 0 0 0 0  
11.7770 20.9680 -7.9330 H 0 0 0 0 0 0 0 0 0 0 0 0 0 0 0  
13.7710 20.8610 -8.7470 C 0 0 0 0 0 0 0 0 0 0 0 0 0 0 0  
13.5140 20.1130 -9.5050 H 0 0 0 0 0 0 0 0 0 0 0 0 0 0 0  
14.5140 21.5430 -9.1760 H 0 0 0 0 0 0 0 0 0 0 0 0 0 0 0  
9.6080 22.5170 -8.7920 C 0 0 0 0 0 0 0 0 0 0 0 0 0 0 0  
9.2660 21.7750 -9.5230 H 0 0 0 0 0 0 0 0 0 0 0 0 0 0 0  
8.7780 23.2030 -8.5870 H 0 0 0 0 0 0 0 0 0 0 0 0 0 0 0  
9.8140 22.0060 -7.8470 H 0 0 0 0 0 0 0 0 0 0 0 0 0 0 0  
14.3120 20.2080 -7.5510 N 0 0 3 0 0 0 0 0 0 0 0 0 0 0 0  
14.4450 20.9150 -6.8260 H 0 0 0 0 0 0 0 0 0 0 0 0 0 0 0  
18.1580 11.8270 -10.6020 C 0 0 0 0 0 0 0 0 0 0 0 0 0 0 0  
17.7520 11.9800 -11.6090 H 0 0 0 0 0 0 0 0 0 0 0 0 0 0 0  
17.4100 11.3280 -9.9750 H 0 0 0 0 0 0 0 0 0 0 0 0 0 0 0  
19.3340 11.0090 -10.6830 O 0 0 0 0 0 0 0 0 0 0 0 0 0 0 0  
19.1270 9.7690 -11.2150 C 0 0 0 0 0 0 0 0 0 0 0 0 0 0 0  
20.4330 9.0060 -11.2490 C 0 0 0 0 0 0 0 0 0 0 0 0 0 0 0  
21.1030 9.5140 -11.9510 H 0 0 0 0 0 0 0 0 0 0 0 0 0 0 0  
20.8680 9.0470 -10.2450 H 0 0 0 0 0 0 0 0 0 0 0 0 0 0 0  
20.2120 7.5540 -11.6900 C 0 0 0 0 0 0 0 0 0 0 0 0 0 0 0  
19.5360 7.0390 -10.9940 H 0 0 0 0 0 0 0 0 0 0 0 0 0 0 0  
19.6830 7.5880 -12.6500 H 0 0 0 0 0 0 0 0 0 0 0 0 0 0 0  
18.0510 9.3450 -11.6130 O 0 0 0 0 0 0 0 0 0 0 0 0 0 0 0  
15.5970 19.5380 -7.7850 C 0 0 0 0 0 0 0 0 0 0 0 0 0 0 0  
16.3070 20.2170 -8.2740 H 0 0 0 0 0 0 0 0 0 0 0 0 0 0 0  
16.0270 19.3110 -6.8010 H 0 0 0 0 0 0 0 0 0 0 0 0 0 0 0  
15.4610 18.2330 -8.5680 C 0 0 0 0 0 0 0 0 0 0 0 0 0 0 0  
14.7140 17.5910 -8.0870 H 0 0 0 0 0 0 0 0 0 0 0 0 0 0 0  
15.1550 18.4300 -9.6000 H 0 0 0 0 0 0 0 0 0 0 0 0 0 0 0  
16.7720 17.4800 -8.6040 C 0 0 0 0 0 0 0 0 0 0 0 0 0 0 0  
16.5730 16.2480 -9.1570 O 0 0 0 0 0 0 0 0 0 0 0 0 0 0 0  
17.7520 15.4350 -9.2420 C 0 0 0 0 0 0 0 0 0 0 0 0 0 0 0  
18.4970 15.9380 -9.8710 H 0 0 0 0 0 0 0 0 0 0 0 0 0 0 0  
18.1630 15.2810 -8.2380 H 0 0 0 0 0 0 0 0 0 0 0 0 0 0 0  
17.3580 14.0990 -9.8600 C 0 0 0 0 0 0 0 0 0 0 0 0 0 0 0  
16.5750 13.6340 -9.2490 H 0 0 0 0 0 0 0 0 0 0 0 0 0 0 0  
16.9060 14.2740 -10.8450 H 0 0 0 0 0 0 0 0 0 0 0 0 0 0 0  
17.8480 17.9060 -8.2100 O 0 0 0 0 0 0 0 0 0 0 0 0 0 0 0  
18.5550 13.1630 -9.9860 C 0 0 0 0 0 0 0 0 0 0 0 0 0 0 0  
19.0070 12.9890 -9.0020 H 0 0 0 0 0 0 0 0 0 0 0 0 0 0 0  
19.3380 13.6270 -10.5980 H 0 0 0 0 0 0 0 0 0 0 0 0 0 0 0  
21.5310 2.4690 -15.6890 C 0 0 0 0 0 0 0 0 0 0 0 0 0 0 0  
22.1760 1.6020 -15.5110 H 0 0 0 0 0 0 0 0 0 0 0 0 0 0 0  
21.5180 2.6750 -16.7660 H 0 0 0 0 0 0 0 0 0 0 0 0 0 0 0  
20.5210 2.1730 -15.3820 H 0 0 0 0 0 0 0 0 0 0 0 0 0 0 0  
21.9890 3.6230 -14.9110 N 0 0 0 0 0 0 0 0 0 0 0 0 0 0 0  
21.0760 4.7610 -15.1100 C 0 0 0 0 0 0 0 0 0 0 0 0 0 0 0

|         |         |          |   |   |   |   |   |   |   |   |   |   |   |   |
|---------|---------|----------|---|---|---|---|---|---|---|---|---|---|---|---|
| 21.1060 | 5.0980  | -16.1540 | H | 0 | 0 | 0 | 0 | 0 | 0 | 0 | 0 | 0 | 0 | 0 |
| 20.0470 | 4.4280  | -14.9200 | H | 0 | 0 | 0 | 0 | 0 | 0 | 0 | 0 | 0 | 0 | 0 |
| 21.3320 | 5.9700  | -14.1930 | C | 0 | 0 | 0 | 0 | 0 | 0 | 0 | 0 | 0 | 0 | 0 |
| 22.3050 | 6.4220  | -14.4200 | H | 0 | 0 | 0 | 0 | 0 | 0 | 0 | 0 | 0 | 0 | 0 |
| 20.5820 | 6.7310  | -14.4370 | H | 0 | 0 | 0 | 0 | 0 | 0 | 0 | 0 | 0 | 0 | 0 |
| 21.2620 | 5.6090  | -12.7010 | C | 0 | 0 | 0 | 0 | 0 | 0 | 0 | 0 | 0 | 0 | 0 |
| 20.3040 | 5.1280  | -12.4620 | H | 0 | 0 | 0 | 0 | 0 | 0 | 0 | 0 | 0 | 0 | 0 |
| 22.0320 | 4.8560  | -12.5110 | H | 0 | 0 | 0 | 0 | 0 | 0 | 0 | 0 | 0 | 0 | 0 |
| 23.3670 | 3.9540  | -15.2810 | C | 0 | 0 | 0 | 0 | 0 | 0 | 0 | 0 | 0 | 0 | 0 |
| 23.4460 | 4.2910  | -16.3210 | H | 0 | 0 | 0 | 0 | 0 | 0 | 0 | 0 | 0 | 0 | 0 |
| 24.0190 | 3.0830  | -15.1530 | H | 0 | 0 | 0 | 0 | 0 | 0 | 0 | 0 | 0 | 0 | 0 |
| 23.7770 | 4.7330  | -14.6300 | H | 0 | 0 | 0 | 0 | 0 | 0 | 0 | 0 | 0 | 0 | 0 |
| 21.4800 | 6.8000  | -11.8420 | N | 0 | 0 | 3 | 0 | 0 | 0 | 0 | 0 | 0 | 0 | 0 |
| 29.4880 | 3.4550  | -7.4220  | C | 0 | 0 | 0 | 0 | 0 | 0 | 0 | 0 | 0 | 0 | 0 |
| 30.0920 | 4.2580  | -7.8600  | H | 0 | 0 | 0 | 0 | 0 | 0 | 0 | 0 | 0 | 0 | 0 |
| 29.4450 | 2.6060  | -8.1140  | H | 0 | 0 | 0 | 0 | 0 | 0 | 0 | 0 | 0 | 0 | 0 |
| 30.0830 | 3.0370  | -6.1840  | O | 0 | 0 | 0 | 0 | 0 | 0 | 0 | 0 | 0 | 0 | 0 |
| 31.3280 | 2.4910  | -6.3080  | C | 0 | 0 | 0 | 0 | 0 | 0 | 0 | 0 | 0 | 0 | 0 |
| 31.8410 | 2.0790  | -4.9480  | C | 0 | 0 | 0 | 0 | 0 | 0 | 0 | 0 | 0 | 0 | 0 |
| 31.9520 | 2.9820  | -4.3380  | H | 0 | 0 | 0 | 0 | 0 | 0 | 0 | 0 | 0 | 0 | 0 |
| 31.0830 | 1.4260  | -4.5030  | H | 0 | 0 | 0 | 0 | 0 | 0 | 0 | 0 | 0 | 0 | 0 |
| 33.1870 | 1.3480  | -5.0580  | C | 0 | 0 | 0 | 0 | 0 | 0 | 0 | 0 | 0 | 0 | 0 |
| 33.0720 | 0.4600  | -5.6950  | H | 0 | 0 | 0 | 0 | 0 | 0 | 0 | 0 | 0 | 0 | 0 |
| 33.8710 | 2.0230  | -5.5860  | H | 0 | 0 | 0 | 0 | 0 | 0 | 0 | 0 | 0 | 0 | 0 |
| 31.9370 | 2.3540  | -7.3590  | O | 0 | 0 | 0 | 0 | 0 | 0 | 0 | 0 | 0 | 0 | 0 |
| 22.0140 | 6.3920  | -10.5220 | C | 0 | 0 | 0 | 0 | 0 | 0 | 0 | 0 | 0 | 0 | 0 |
| 21.8940 | 7.2050  | -9.7970  | H | 0 | 0 | 0 | 0 | 0 | 0 | 0 | 0 | 0 | 0 | 0 |
| 21.4450 | 5.5430  | -10.1190 | H | 0 | 0 | 0 | 0 | 0 | 0 | 0 | 0 | 0 | 0 | 0 |
| 23.5130 | 6.0650  | -10.5810 | C | 0 | 0 | 0 | 0 | 0 | 0 | 0 | 0 | 0 | 0 | 0 |
| 23.7100 | 5.2320  | -11.2620 | H | 0 | 0 | 0 | 0 | 0 | 0 | 0 | 0 | 0 | 0 | 0 |
| 24.0720 | 6.9440  | -10.9230 | H | 0 | 0 | 0 | 0 | 0 | 0 | 0 | 0 | 0 | 0 | 0 |
| 24.0360 | 5.6740  | -9.2200  | C | 0 | 0 | 0 | 0 | 0 | 0 | 0 | 0 | 0 | 0 | 0 |
| 25.3400 | 5.2840  | -9.3250  | O | 0 | 0 | 0 | 0 | 0 | 0 | 0 | 0 | 0 | 0 | 0 |
| 25.9460 | 4.8880  | -8.0860  | C | 0 | 0 | 0 | 0 | 0 | 0 | 0 | 0 | 0 | 0 | 0 |
| 25.9700 | 5.7460  | -7.4040  | H | 0 | 0 | 0 | 0 | 0 | 0 | 0 | 0 | 0 | 0 | 0 |
| 25.3630 | 4.0760  | -7.6350  | H | 0 | 0 | 0 | 0 | 0 | 0 | 0 | 0 | 0 | 0 | 0 |
| 27.3620 | 4.4110  | -8.3850  | C | 0 | 0 | 0 | 0 | 0 | 0 | 0 | 0 | 0 | 0 | 0 |
| 27.3210 | 3.5920  | -9.1140  | H | 0 | 0 | 0 | 0 | 0 | 0 | 0 | 0 | 0 | 0 | 0 |
| 27.9230 | 5.2180  | -8.8720  | H | 0 | 0 | 0 | 0 | 0 | 0 | 0 | 0 | 0 | 0 | 0 |
| 23.3930 | 5.7080  | -8.1810  | O | 0 | 0 | 0 | 0 | 0 | 0 | 0 | 0 | 0 | 0 | 0 |
| 28.0810 | 3.9560  | -7.1200  | C | 0 | 0 | 0 | 0 | 0 | 0 | 0 | 0 | 0 | 0 | 0 |
| 27.5110 | 3.1590  | -6.6250  | H | 0 | 0 | 0 | 0 | 0 | 0 | 0 | 0 | 0 | 0 | 0 |
| 28.1350 | 4.7790  | -6.3970  | H | 0 | 0 | 0 | 0 | 0 | 0 | 0 | 0 | 0 | 0 | 0 |
| 29.4760 | -0.3000 | 0.5150   | C | 0 | 0 | 0 | 0 | 0 | 0 | 0 | 0 | 0 | 0 | 0 |
| 28.8480 | 0.2270  | 1.2420   | H | 0 | 0 | 0 | 0 | 0 | 0 | 0 | 0 | 0 | 0 | 0 |
| 29.9190 | -1.1720 | 1.0090   | H | 0 | 0 | 0 | 0 | 0 | 0 | 0 | 0 | 0 | 0 | 0 |
| 28.8050 | -0.6540 | -0.2760  | H | 0 | 0 | 0 | 0 | 0 | 0 | 0 | 0 | 0 | 0 | 0 |
| 30.4940 | 0.6000  | -0.0360  | N | 0 | 0 | 0 | 0 | 0 | 0 | 0 | 0 | 0 | 0 | 0 |
| 31.2890 | -0.1060 | -1.0570  | C | 0 | 0 | 0 | 0 | 0 | 0 | 0 | 0 | 0 | 0 | 0 |
| 31.8680 | -0.9210 | -0.6040  | H | 0 | 0 | 0 | 0 | 0 | 0 | 0 | 0 | 0 | 0 | 0 |
| 30.6010 | -0.5670 | -1.7780  | H | 0 | 0 | 0 | 0 | 0 | 0 | 0 | 0 | 0 | 0 | 0 |
| 32.2250 | 0.8230  | -1.8450  | C | 0 | 0 | 0 | 0 | 0 | 0 | 0 | 0 | 0 | 0 | 0 |
| 31.6490 | 1.6690  | -2.2340  | H | 0 | 0 | 0 | 0 | 0 | 0 | 0 | 0 | 0 | 0 | 0 |
| 32.9970 | 1.2360  | -1.1850  | H | 0 | 0 | 0 | 0 | 0 | 0 | 0 | 0 | 0 | 0 | 0 |
| 32.9150 | 0.0610  | -2.9860  | C | 0 | 0 | 0 | 0 | 0 | 0 | 0 | 0 | 0 | 0 | 0 |
| 33.4920 | -0.7540 | -2.5280  | H | 0 | 0 | 0 | 0 | 0 | 0 | 0 | 0 | 0 | 0 | 0 |
| 32.1800 | -0.4380 | -3.6300  | H | 0 | 0 | 0 | 0 | 0 | 0 | 0 | 0 | 0 | 0 | 0 |
| 31.3300 | 1.1220  | 1.0480   | C | 0 | 0 | 0 | 0 | 0 | 0 | 0 | 0 | 0 | 0 | 0 |
| 31.9200 | 0.3350  | 1.5310   | H | 0 | 0 | 0 | 0 | 0 | 0 | 0 | 0 | 0 | 0 | 0 |
| 30.7100 | 1.6030  | 1.8130   | H | 0 | 0 | 0 | 0 | 0 | 0 | 0 | 0 | 0 | 0 | 0 |
| 32.0120 | 1.8970  | 0.6860   | H | 0 | 0 | 0 | 0 | 0 | 0 | 0 | 0 | 0 | 0 | 0 |
| 33.7910 | 0.9690  | -3.7590  | N | 0 | 0 | 3 | 0 | 0 | 0 | 0 | 0 | 0 | 0 | 0 |
| 43.2340 | 2.9520  | -5.1150  | C | 0 | 0 | 0 | 0 | 0 | 0 | 0 | 0 | 0 | 0 | 0 |
| 43.1340 | 3.6700  | -4.2940  | H | 0 | 0 | 0 | 0 | 0 | 0 | 0 | 0 | 0 | 0 | 0 |
| 43.0310 | 3.4520  | -6.0690  | H | 0 | 0 | 0 | 0 | 0 | 0 | 0 | 0 | 0 | 0 | 0 |
| 44.5690 | 2.4240  | -5.1320  | O | 0 | 0 | 0 | 0 | 0 | 0 | 0 | 0 | 0 | 0 | 0 |
| 45.5530 | 3.3620  | -5.2560  | C | 0 | 0 | 0 | 0 | 0 | 0 | 0 | 0 | 0 | 0 | 0 |
| 46.9030 | 2.6840  | -5.2760  | C | 0 | 0 | 0 | 0 | 0 | 0 | 0 | 0 | 0 | 0 | 0 |
| 46.9410 | 1.9710  | -4.4440  | H | 0 | 0 | 0 | 0 | 0 | 0 | 0 | 0 | 0 | 0 | 0 |
| 46.9790 | 2.1400  | -6.2230  | H | 0 | 0 | 0 | 0 | 0 | 0 | 0 | 0 | 0 | 0 | 0 |
| 48.0420 | 3.7020  | -5.1310  | C | 0 | 0 | 0 | 0 | 0 | 0 | 0 | 0 | 0 | 0 | 0 |
| 48.0400 | 4.3870  | -5.9880  | H | 0 | 0 | 0 | 0 | 0 | 0 | 0 | 0 | 0 | 0 | 0 |
| 47.8210 | 4.3140  | -4.2460  | H | 0 | 0 | 0 | 0 | 0 | 0 | 0 | 0 | 0 | 0 | 0 |
| 45.3720 | 4.5670  | -5.3590  | O | 0 | 0 | 0 | 0 | 0 | 0 | 0 | 0 | 0 | 0 | 0 |
| 35.1230 | 0.3440  | -3.9420  | C | 0 | 0 | 0 | 0 | 0 | 0 | 0 | 0 | 0 | 0 | 0 |
| 35.4720 | -0.0240 | -2.9670  | H | 0 | 0 | 0 | 0 | 0 | 0 | 0 | 0 | 0 | 0 | 0 |
| 35.0490 | -0.5330 | -4.5990  | H | 0 | 0 | 0 | 0 | 0 | 0 | 0 | 0 | 0 | 0 | 0 |
| 36.2020 | 1.3030  | -4.4590  | C | 0 | 0 | 0 | 0 | 0 | 0 | 0 | 0 | 0 | 0 | 0 |
| 36.0050 | 1.6020  | -5.4930  | H | 0 | 0 | 0 | 0 | 0 | 0 | 0 | 0 | 0 | 0 | 0 |
| 36.2320 | 2.1960  | -3.8230  | H | 0 | 0 | 0 | 0 | 0 | 0 | 0 | 0 | 0 | 0 | 0 |
| 37.5660 | 0.6520  | -4.4270  | C | 0 | 0 | 0 | 0 | 0 | 0 | 0 | 0 | 0 | 0 | 0 |



|         |         |          |   |   |   |   |   |   |   |   |   |   |   |   |   |
|---------|---------|----------|---|---|---|---|---|---|---|---|---|---|---|---|---|
| 64.4720 | 7.4150  | -14.4260 | H | 0 | 0 | 0 | 0 | 0 | 0 | 0 | 0 | 0 | 0 | 0 | 0 |
| 64.5600 | 8.1120  | -16.3780 | O | 0 | 0 | 0 | 0 | 0 | 0 | 0 | 0 | 0 | 0 | 0 | 0 |
| 64.9300 | 6.9410  | -16.9720 | C | 0 | 0 | 0 | 0 | 0 | 0 | 0 | 0 | 0 | 0 | 0 | 0 |
| 65.6710 | 7.2450  | -18.2520 | C | 0 | 0 | 0 | 0 | 0 | 0 | 0 | 0 | 0 | 0 | 0 | 0 |
| 65.0100 | 7.8220  | -18.9070 | H | 0 | 0 | 0 | 0 | 0 | 0 | 0 | 0 | 0 | 0 | 0 | 0 |
| 66.5510 | 7.8490  | -18.0080 | H | 0 | 0 | 0 | 0 | 0 | 0 | 0 | 0 | 0 | 0 | 0 | 0 |
| 66.1120 | 5.9810  | -18.9700 | C | 0 | 0 | 0 | 0 | 0 | 0 | 0 | 0 | 0 | 0 | 0 | 0 |
| 66.7790 | 5.3830  | -18.3400 | H | 0 | 0 | 0 | 0 | 0 | 0 | 0 | 0 | 0 | 0 | 0 | 0 |
| 66.6450 | 6.2320  | -19.8910 | H | 0 | 0 | 0 | 0 | 0 | 0 | 0 | 0 | 0 | 0 | 0 | 0 |
| 65.2510 | 5.3560  | -19.2310 | H | 0 | 0 | 0 | 0 | 0 | 0 | 0 | 0 | 0 | 0 | 0 | 0 |
| 64.6960 | 5.8240  | -16.5340 | O | 0 | 0 | 0 | 0 | 0 | 0 | 0 | 0 | 0 | 0 | 0 | 0 |
| 60.0380 | 12.6570 | -9.0400  | C | 0 | 0 | 0 | 0 | 0 | 0 | 0 | 0 | 0 | 0 | 0 | 0 |
| 59.4120 | 13.1470 | -9.7990  | H | 0 | 0 | 0 | 0 | 0 | 0 | 0 | 0 | 0 | 0 | 0 | 0 |
| 60.8540 | 13.3580 | -8.8250  | H | 0 | 0 | 0 | 0 | 0 | 0 | 0 | 0 | 0 | 0 | 0 | 0 |
| 60.5940 | 11.3760 | -9.6650  | C | 0 | 0 | 0 | 0 | 0 | 0 | 0 | 0 | 0 | 0 | 0 | 0 |
| 61.3180 | 10.8950 | -8.9990  | H | 0 | 0 | 0 | 0 | 0 | 0 | 0 | 0 | 0 | 0 | 0 | 0 |
| 59.7750 | 10.6800 | -9.8780  | H | 0 | 0 | 0 | 0 | 0 | 0 | 0 | 0 | 0 | 0 | 0 | 0 |
| 61.3130 | 11.6740 | -10.9540 | C | 0 | 0 | 0 | 0 | 0 | 0 | 0 | 0 | 0 | 0 | 0 | 0 |
| 61.6860 | 10.5020 | -11.5410 | O | 0 | 0 | 0 | 0 | 0 | 0 | 0 | 0 | 0 | 0 | 0 | 0 |
| 62.4020 | 10.6580 | -12.7720 | C | 0 | 0 | 0 | 0 | 0 | 0 | 0 | 0 | 0 | 0 | 0 | 0 |
| 61.7750 | 11.1940 | -13.4940 | H | 0 | 0 | 0 | 0 | 0 | 0 | 0 | 0 | 0 | 0 | 0 | 0 |
| 63.3220 | 11.2270 | -12.5900 | H | 0 | 0 | 0 | 0 | 0 | 0 | 0 | 0 | 0 | 0 | 0 | 0 |
| 62.7400 | 9.2690  | -13.3010 | C | 0 | 0 | 0 | 0 | 0 | 0 | 0 | 0 | 0 | 0 | 0 | 0 |
| 63.3260 | 8.7270  | -12.5480 | H | 0 | 0 | 0 | 0 | 0 | 0 | 0 | 0 | 0 | 0 | 0 | 0 |
| 61.8140 | 8.6950  | -13.4310 | H | 0 | 0 | 0 | 0 | 0 | 0 | 0 | 0 | 0 | 0 | 0 | 0 |
| 61.5450 | 12.7910 | -11.3930 | O | 0 | 0 | 0 | 0 | 0 | 0 | 0 | 0 | 0 | 0 | 0 | 0 |
| 63.5060 | 9.3410  | -14.6160 | C | 0 | 0 | 0 | 0 | 0 | 0 | 0 | 0 | 0 | 0 | 0 | 0 |
| 64.4330 | 9.9150  | -14.4850 | H | 0 | 0 | 0 | 0 | 0 | 0 | 0 | 0 | 0 | 0 | 0 | 0 |
| 62.9210 | 9.8840  | -15.3680 | H | 0 | 0 | 0 | 0 | 0 | 0 | 0 | 0 | 0 | 0 | 0 | 0 |
| 1       | 2       | 1        | 0 | 0 | 0 | 0 |   |   |   |   |   |   |   |   |   |
| 1       | 3       | 1        | 0 | 0 | 0 | 0 |   |   |   |   |   |   |   |   |   |
| 1       | 4       | 1        | 0 | 0 | 0 | 0 |   |   |   |   |   |   |   |   |   |
| 1       | 5       | 1        | 0 | 0 | 0 | 0 |   |   |   |   |   |   |   |   |   |
| 5       | 6       | 1        | 0 | 0 | 0 | 0 |   |   |   |   |   |   |   |   |   |
| 5       | 15      | 1        | 0 | 0 | 0 | 0 |   |   |   |   |   |   |   |   |   |
| 6       | 7       | 1        | 0 | 0 | 0 | 0 |   |   |   |   |   |   |   |   |   |
| 6       | 8       | 1        | 0 | 0 | 0 | 0 |   |   |   |   |   |   |   |   |   |
| 6       | 9       | 1        | 0 | 0 | 0 | 0 |   |   |   |   |   |   |   |   |   |
| 9       | 10      | 1        | 0 | 0 | 0 | 0 |   |   |   |   |   |   |   |   |   |
| 9       | 11      | 1        | 0 | 0 | 0 | 0 |   |   |   |   |   |   |   |   |   |
| 9       | 12      | 1        | 0 | 0 | 0 | 0 |   |   |   |   |   |   |   |   |   |
| 12      | 13      | 1        | 0 | 0 | 0 | 0 |   |   |   |   |   |   |   |   |   |
| 12      | 14      | 1        | 0 | 0 | 0 | 0 |   |   |   |   |   |   |   |   |   |
| 12      | 19      | 1        | 0 | 0 | 0 | 0 |   |   |   |   |   |   |   |   |   |
| 15      | 16      | 1        | 0 | 0 | 0 | 0 |   |   |   |   |   |   |   |   |   |
| 15      | 17      | 1        | 0 | 0 | 0 | 0 |   |   |   |   |   |   |   |   |   |
| 15      | 18      | 1        | 0 | 0 | 0 | 0 |   |   |   |   |   |   |   |   |   |
| 19      | 20      | 1        | 0 | 0 | 0 | 0 |   |   |   |   |   |   |   |   |   |
| 19      | 33      | 1        | 0 | 0 | 0 | 0 |   |   |   |   |   |   |   |   |   |
| 21      | 22      | 1        | 0 | 0 | 0 | 0 |   |   |   |   |   |   |   |   |   |
| 21      | 23      | 1        | 0 | 0 | 0 | 0 |   |   |   |   |   |   |   |   |   |
| 21      | 24      | 1        | 0 | 0 | 0 | 0 |   |   |   |   |   |   |   |   |   |
| 21      | 48      | 1        | 0 | 0 | 0 | 0 |   |   |   |   |   |   |   |   |   |
| 24      | 25      | 1        | 0 | 0 | 0 | 0 |   |   |   |   |   |   |   |   |   |
| 25      | 26      | 1        | 0 | 0 | 0 | 0 |   |   |   |   |   |   |   |   |   |
| 25      | 32      | 2        | 0 | 0 | 0 | 0 |   |   |   |   |   |   |   |   |   |
| 26      | 27      | 1        | 0 | 0 | 0 | 0 |   |   |   |   |   |   |   |   |   |
| 26      | 28      | 1        | 0 | 0 | 0 | 0 |   |   |   |   |   |   |   |   |   |
| 26      | 29      | 1        | 0 | 0 | 0 | 0 |   |   |   |   |   |   |   |   |   |
| 29      | 30      | 1        | 0 | 0 | 0 | 0 |   |   |   |   |   |   |   |   |   |
| 29      | 31      | 1        | 0 | 0 | 0 | 0 |   |   |   |   |   |   |   |   |   |
| 29      | 69      | 1        | 0 | 0 | 0 | 0 |   |   |   |   |   |   |   |   |   |
| 33      | 34      | 1        | 0 | 0 | 0 | 0 |   |   |   |   |   |   |   |   |   |
| 33      | 35      | 1        | 0 | 0 | 0 | 0 |   |   |   |   |   |   |   |   |   |
| 33      | 36      | 1        | 0 | 0 | 0 | 0 |   |   |   |   |   |   |   |   |   |
| 36      | 37      | 1        | 0 | 0 | 0 | 0 |   |   |   |   |   |   |   |   |   |
| 36      | 38      | 1        | 0 | 0 | 0 | 0 |   |   |   |   |   |   |   |   |   |
| 36      | 39      | 1        | 0 | 0 | 0 | 0 |   |   |   |   |   |   |   |   |   |
| 39      | 40      | 1        | 0 | 0 | 0 | 0 |   |   |   |   |   |   |   |   |   |
| 39      | 47      | 2        | 0 | 0 | 0 | 0 |   |   |   |   |   |   |   |   |   |
| 40      | 41      | 1        | 0 | 0 | 0 | 0 |   |   |   |   |   |   |   |   |   |
| 41      | 42      | 1        | 0 | 0 | 0 | 0 |   |   |   |   |   |   |   |   |   |
| 41      | 43      | 1        | 0 | 0 | 0 | 0 |   |   |   |   |   |   |   |   |   |
| 41      | 44      | 1        | 0 | 0 | 0 | 0 |   |   |   |   |   |   |   |   |   |
| 44      | 45      | 1        | 0 | 0 | 0 | 0 |   |   |   |   |   |   |   |   |   |
| 44      | 46      | 1        | 0 | 0 | 0 | 0 |   |   |   |   |   |   |   |   |   |
| 44      | 48      | 1        | 0 | 0 | 0 | 0 |   |   |   |   |   |   |   |   |   |
| 48      | 49      | 1        | 0 | 0 | 0 | 0 |   |   |   |   |   |   |   |   |   |
| 48      | 50      | 1        | 0 | 0 | 0 | 0 |   |   |   |   |   |   |   |   |   |
| 51      | 52      | 1        | 0 | 0 | 0 | 0 |   |   |   |   |   |   |   |   |   |
| 51      | 53      | 1        | 0 | 0 | 0 | 0 |   |   |   |   |   |   |   |   |   |



|     |     |   |   |   |   |   |
|-----|-----|---|---|---|---|---|
| 51  | 54  | 1 | 0 | 0 | 0 | 0 |
| 51  | 55  | 1 | 0 | 0 | 0 | 0 |
| 55  | 56  | 1 | 0 | 0 | 0 | 0 |
| 55  | 65  | 1 | 0 | 0 | 0 | 0 |
| 56  | 57  | 1 | 0 | 0 | 0 | 0 |
| 56  | 58  | 1 | 0 | 0 | 0 | 0 |
| 56  | 59  | 1 | 0 | 0 | 0 | 0 |
| 59  | 60  | 1 | 0 | 0 | 0 | 0 |
| 59  | 61  | 1 | 0 | 0 | 0 | 0 |
| 59  | 62  | 1 | 0 | 0 | 0 | 0 |
| 62  | 63  | 1 | 0 | 0 | 0 | 0 |
| 62  | 64  | 1 | 0 | 0 | 0 | 0 |
| 62  | 69  | 1 | 0 | 0 | 0 | 0 |
| 65  | 66  | 1 | 0 | 0 | 0 | 0 |
| 65  | 67  | 1 | 0 | 0 | 0 | 0 |
| 65  | 68  | 1 | 0 | 0 | 0 | 0 |
| 69  | 82  | 1 | 0 | 0 | 0 | 0 |
| 70  | 71  | 1 | 0 | 0 | 0 | 0 |
| 70  | 72  | 1 | 0 | 0 | 0 | 0 |
| 70  | 73  | 1 | 0 | 0 | 0 | 0 |
| 70  | 97  | 1 | 0 | 0 | 0 | 0 |
| 73  | 74  | 1 | 0 | 0 | 0 | 0 |
| 74  | 75  | 1 | 0 | 0 | 0 | 0 |
| 74  | 81  | 2 | 0 | 0 | 0 | 0 |
| 75  | 76  | 1 | 0 | 0 | 0 | 0 |
| 75  | 77  | 1 | 0 | 0 | 0 | 0 |
| 75  | 78  | 1 | 0 | 0 | 0 | 0 |
| 78  | 79  | 1 | 0 | 0 | 0 | 0 |
| 78  | 80  | 1 | 0 | 0 | 0 | 0 |
| 78  | 118 | 1 | 0 | 0 | 0 | 0 |
| 82  | 83  | 1 | 0 | 0 | 0 | 0 |
| 82  | 84  | 1 | 0 | 0 | 0 | 0 |
| 82  | 85  | 1 | 0 | 0 | 0 | 0 |
| 85  | 86  | 1 | 0 | 0 | 0 | 0 |
| 85  | 87  | 1 | 0 | 0 | 0 | 0 |
| 85  | 88  | 1 | 0 | 0 | 0 | 0 |
| 88  | 89  | 1 | 0 | 0 | 0 | 0 |
| 88  | 96  | 2 | 0 | 0 | 0 | 0 |
| 89  | 90  | 1 | 0 | 0 | 0 | 0 |
| 90  | 91  | 1 | 0 | 0 | 0 | 0 |
| 90  | 92  | 1 | 0 | 0 | 0 | 0 |
| 90  | 93  | 1 | 0 | 0 | 0 | 0 |
| 93  | 94  | 1 | 0 | 0 | 0 | 0 |
| 93  | 95  | 1 | 0 | 0 | 0 | 0 |
| 93  | 97  | 1 | 0 | 0 | 0 | 0 |
| 97  | 98  | 1 | 0 | 0 | 0 | 0 |
| 97  | 99  | 1 | 0 | 0 | 0 | 0 |
| 100 | 101 | 1 | 0 | 0 | 0 | 0 |
| 100 | 102 | 1 | 0 | 0 | 0 | 0 |
| 100 | 103 | 1 | 0 | 0 | 0 | 0 |
| 100 | 104 | 1 | 0 | 0 | 0 | 0 |
| 104 | 105 | 1 | 0 | 0 | 0 | 0 |
| 104 | 114 | 1 | 0 | 0 | 0 | 0 |
| 105 | 106 | 1 | 0 | 0 | 0 | 0 |
| 105 | 107 | 1 | 0 | 0 | 0 | 0 |
| 105 | 108 | 1 | 0 | 0 | 0 | 0 |
| 108 | 109 | 1 | 0 | 0 | 0 | 0 |
| 108 | 110 | 1 | 0 | 0 | 0 | 0 |
| 108 | 111 | 1 | 0 | 0 | 0 | 0 |
| 111 | 112 | 1 | 0 | 0 | 0 | 0 |
| 111 | 113 | 1 | 0 | 0 | 0 | 0 |
| 111 | 118 | 1 | 0 | 0 | 0 | 0 |
| 114 | 115 | 1 | 0 | 0 | 0 | 0 |
| 114 | 116 | 1 | 0 | 0 | 0 | 0 |
| 114 | 117 | 1 | 0 | 0 | 0 | 0 |
| 118 | 131 | 1 | 0 | 0 | 0 | 0 |
| 119 | 120 | 1 | 0 | 0 | 0 | 0 |
| 119 | 121 | 1 | 0 | 0 | 0 | 0 |
| 119 | 122 | 1 | 0 | 0 | 0 | 0 |
| 119 | 146 | 1 | 0 | 0 | 0 | 0 |
| 122 | 123 | 1 | 0 | 0 | 0 | 0 |
| 123 | 124 | 1 | 0 | 0 | 0 | 0 |
| 123 | 130 | 2 | 0 | 0 | 0 | 0 |
| 124 | 125 | 1 | 0 | 0 | 0 | 0 |
| 124 | 126 | 1 | 0 | 0 | 0 | 0 |
| 124 | 127 | 1 | 0 | 0 | 0 | 0 |
| 127 | 128 | 1 | 0 | 0 | 0 | 0 |
| 127 | 129 | 1 | 0 | 0 | 0 | 0 |
| 127 | 167 | 1 | 0 | 0 | 0 | 0 |
| 131 | 132 | 1 | 0 | 0 | 0 | 0 |
| 131 | 133 | 1 | 0 | 0 | 0 | 0 |

|        |   |   |   |   |   |
|--------|---|---|---|---|---|
| 131134 | 1 | 0 | 0 | 0 | 0 |
| 134135 | 1 | 0 | 0 | 0 | 0 |
| 134136 | 1 | 0 | 0 | 0 | 0 |
| 134137 | 1 | 0 | 0 | 0 | 0 |
| 137138 | 1 | 0 | 0 | 0 | 0 |
| 137145 | 2 | 0 | 0 | 0 | 0 |
| 138139 | 1 | 0 | 0 | 0 | 0 |
| 139140 | 1 | 0 | 0 | 0 | 0 |
| 139141 | 1 | 0 | 0 | 0 | 0 |
| 139142 | 1 | 0 | 0 | 0 | 0 |
| 142143 | 1 | 0 | 0 | 0 | 0 |
| 142144 | 1 | 0 | 0 | 0 | 0 |
| 142146 | 1 | 0 | 0 | 0 | 0 |
| 146147 | 1 | 0 | 0 | 0 | 0 |
| 146148 | 1 | 0 | 0 | 0 | 0 |
| 149150 | 1 | 0 | 0 | 0 | 0 |
| 149151 | 1 | 0 | 0 | 0 | 0 |
| 149152 | 1 | 0 | 0 | 0 | 0 |
| 149153 | 1 | 0 | 0 | 0 | 0 |
| 153154 | 1 | 0 | 0 | 0 | 0 |
| 153163 | 1 | 0 | 0 | 0 | 0 |
| 154155 | 1 | 0 | 0 | 0 | 0 |
| 154156 | 1 | 0 | 0 | 0 | 0 |
| 154157 | 1 | 0 | 0 | 0 | 0 |
| 157158 | 1 | 0 | 0 | 0 | 0 |
| 157159 | 1 | 0 | 0 | 0 | 0 |
| 157160 | 1 | 0 | 0 | 0 | 0 |
| 160161 | 1 | 0 | 0 | 0 | 0 |
| 160162 | 1 | 0 | 0 | 0 | 0 |
| 160167 | 1 | 0 | 0 | 0 | 0 |
| 163164 | 1 | 0 | 0 | 0 | 0 |
| 163165 | 1 | 0 | 0 | 0 | 0 |
| 163166 | 1 | 0 | 0 | 0 | 0 |
| 167180 | 1 | 0 | 0 | 0 | 0 |
| 168169 | 1 | 0 | 0 | 0 | 0 |
| 168170 | 1 | 0 | 0 | 0 | 0 |
| 168171 | 1 | 0 | 0 | 0 | 0 |
| 168195 | 1 | 0 | 0 | 0 | 0 |
| 171172 | 1 | 0 | 0 | 0 | 0 |
| 172173 | 1 | 0 | 0 | 0 | 0 |
| 172179 | 2 | 0 | 0 | 0 | 0 |
| 173174 | 1 | 0 | 0 | 0 | 0 |
| 173175 | 1 | 0 | 0 | 0 | 0 |
| 173176 | 1 | 0 | 0 | 0 | 0 |
| 176177 | 1 | 0 | 0 | 0 | 0 |
| 176178 | 1 | 0 | 0 | 0 | 0 |
| 176216 | 1 | 0 | 0 | 0 | 0 |
| 180181 | 1 | 0 | 0 | 0 | 0 |
| 180182 | 1 | 0 | 0 | 0 | 0 |
| 180183 | 1 | 0 | 0 | 0 | 0 |
| 183184 | 1 | 0 | 0 | 0 | 0 |
| 183185 | 1 | 0 | 0 | 0 | 0 |
| 183186 | 1 | 0 | 0 | 0 | 0 |
| 186187 | 1 | 0 | 0 | 0 | 0 |
| 186194 | 2 | 0 | 0 | 0 | 0 |
| 187188 | 1 | 0 | 0 | 0 | 0 |
| 188189 | 1 | 0 | 0 | 0 | 0 |
| 188190 | 1 | 0 | 0 | 0 | 0 |
| 188191 | 1 | 0 | 0 | 0 | 0 |
| 191192 | 1 | 0 | 0 | 0 | 0 |
| 191193 | 1 | 0 | 0 | 0 | 0 |
| 191195 | 1 | 0 | 0 | 0 | 0 |
| 195196 | 1 | 0 | 0 | 0 | 0 |
| 195197 | 1 | 0 | 0 | 0 | 0 |
| 198199 | 1 | 0 | 0 | 0 | 0 |
| 198200 | 1 | 0 | 0 | 0 | 0 |
| 198201 | 1 | 0 | 0 | 0 | 0 |
| 198202 | 1 | 0 | 0 | 0 | 0 |
| 202203 | 1 | 0 | 0 | 0 | 0 |
| 202212 | 1 | 0 | 0 | 0 | 0 |
| 203204 | 1 | 0 | 0 | 0 | 0 |
| 203205 | 1 | 0 | 0 | 0 | 0 |
| 203206 | 1 | 0 | 0 | 0 | 0 |
| 206207 | 1 | 0 | 0 | 0 | 0 |
| 206208 | 1 | 0 | 0 | 0 | 0 |
| 206209 | 1 | 0 | 0 | 0 | 0 |
| 209210 | 1 | 0 | 0 | 0 | 0 |
| 209211 | 1 | 0 | 0 | 0 | 0 |
| 209216 | 1 | 0 | 0 | 0 | 0 |
| 212213 | 1 | 0 | 0 | 0 | 0 |
| 212214 | 1 | 0 | 0 | 0 | 0 |

```

212215 1 0 0 0 0
216230 1 0 0 0 0
217218 1 0 0 0 0
217219 1 0 0 0 0
217220 1 0 0 0 0
217245 1 0 0 0 0
220221 1 0 0 0 0
221222 1 0 0 0 0
221229 2 0 0 0 0
222223 1 0 0 0 0
222224 1 0 0 0 0
222225 1 0 0 0 0
225226 1 0 0 0 0
225227 1 0 0 0 0
225228 1 0 0 0 0
230231 1 0 0 0 0
230232 1 0 0 0 0
230233 1 0 0 0 0
233234 1 0 0 0 0
233235 1 0 0 0 0
233236 1 0 0 0 0
236237 1 0 0 0 0
236244 2 0 0 0 0
237238 1 0 0 0 0
238239 1 0 0 0 0
238240 1 0 0 0 0
238241 1 0 0 0 0
241242 1 0 0 0 0
241243 1 0 0 0 0
241245 1 0 0 0 0
245246 1 0 0 0 0
245247 1 0 0 0 0

```

```

M END
> <NAME>
C80_1

```

```

$$$$
C86_1
MOE2012 3D

```

```

272271 0 0 1 0 0 0 0 0999 V2000
16.2060 -17.3600 20.2130 C 0 0 0 0 0 0 0 0 0 0 0 0 0 0 0
15.3220 -17.2070 19.5780 H 0 0 0 0 0 0 0 0 0 0 0 0 0 0 0
16.0930 -18.3680 20.6340 H 0 0 0 0 0 0 0 0 0 0 0 0 0 0 0
17.4240 -17.2710 19.3770 N 0 0 0 0 0 0 0 0 0 0 0 0 0 0 0
17.2980 -18.2110 18.2400 C 0 0 0 0 0 0 0 0 0 0 0 0 0 0 0
17.4570 -19.2460 18.5710 H 0 0 0 0 0 0 0 0 0 0 0 0 0 0 0
16.2760 -18.1640 17.8390 H 0 0 0 0 0 0 0 0 0 0 0 0 0 0 0
18.2450 -17.8520 17.0760 C 0 0 0 0 0 0 0 0 0 0 0 0 0 0 0
18.0270 -16.8240 16.7650 H 0 0 0 0 0 0 0 0 0 0 0 0 0 0 0
19.2910 -17.8890 17.4000 H 0 0 0 0 0 0 0 0 0 0 0 0 0 0 0
18.0450 -18.7860 15.9600 N 0 0 3 0 0 0 0 0 0 0 0 0 0 0 0
18.3210 -19.7210 16.2640 H 0 0 0 0 0 0 0 0 0 0 0 0 0 0 0
18.6470 -17.5400 20.1610 C 0 0 0 0 0 0 0 0 0 0 0 0 0 0 0
18.4280 -18.0740 21.0950 H 0 0 0 0 0 0 0 0 0 0 0 0 0 0 0
19.3340 -18.2130 19.6320 H 0 0 0 0 0 0 0 0 0 0 0 0 0 0 0
16.1160 -16.3260 21.3420 C 0 0 0 0 0 0 0 0 0 0 0 0 0 0 0
16.8890 -16.4890 22.0980 H 0 0 0 0 0 0 0 0 0 0 0 0 0 0 0
16.2080 -15.3100 20.9450 H 0 0 0 0 0 0 0 0 0 0 0 0 0 0 0
14.8490 -16.4420 21.9820 O 0 0 0 0 0 0 0 0 0 0 0 0 0 0 0
14.8210 -15.7690 22.6850 H 0 0 0 0 0 0 0 0 0 0 0 0 0 0 0
19.4160 -16.2490 20.4550 C 0 0 0 0 0 0 0 0 0 0 0 0 0 0 0
19.7860 -15.8000 19.5260 H 0 0 0 0 0 0 0 0 0 0 0 0 0 0 0
18.7950 -15.5160 20.9760 H 0 0 0 0 0 0 0 0 0 0 0 0 0 0 0
20.5330 -16.5490 21.2870 O 0 0 0 0 0 0 0 0 0 0 0 0 0 0 0
20.9940 -15.7090 21.4600 H 0 0 0 0 0 0 0 0 0 0 0 0 0 0 0
18.3230 -12.5260 8.5460 C 0 0 0 0 0 0 0 0 0 0 0 0 0 0 0
18.4310 -11.7130 9.2730 H 0 0 0 0 0 0 0 0 0 0 0 0 0 0 0
17.2590 -12.7210 8.3670 H 0 0 0 0 0 0 0 0 0 0 0 0 0 0 0
18.9530 -12.1520 7.3140 O 0 0 0 0 0 0 0 0 0 0 0 0 0 0 0
18.4430 -11.0240 6.7420 C 0 0 0 0 0 0 0 0 0 0 0 0 0 0 0
19.1860 -10.7350 5.4610 C 0 0 0 0 0 0 0 0 0 0 0 0 0 0 0
20.2450 -10.6210 5.7130 H 0 0 0 0 0 0 0 0 0 0 0 0 0 0 0
19.0620 -11.5950 4.7950 H 0 0 0 0 0 0 0 0 0 0 0 0 0 0 0
18.6480 -9.4630 4.8000 C 0 0 0 0 0 0 0 0 0 0 0 0 0 0 0
17.5700 -9.5780 4.6190 H 0 0 0 0 0 0 0 0 0 0 0 0 0 0 0
18.7020 -8.6280 5.5100 H 0 0 0 0 0 0 0 0 0 0 0 0 0 0 0
17.5290 -10.3530 7.1990 O 0 0 0 0 0 0 0 0 0 0 0 0 0 0 0
18.8290 -18.4290 14.7740 C 0 0 0 0 0 0 0 0 0 0 0 0 0 0 0
19.8770 -18.2400 15.0390 H 0 0 0 0 0 0 0 0 0 0 0 0 0 0 0
18.8360 -19.3020 14.1090 H 0 0 0 0 0 0 0 0 0 0 0 0 0 0 0

```





|         |         |         |   |   |   |   |   |   |   |   |   |   |   |   |   |
|---------|---------|---------|---|---|---|---|---|---|---|---|---|---|---|---|---|
| 42.0260 | -4.6300 | 9.9780  | C | 0 | 0 | 0 | 0 | 0 | 0 | 0 | 0 | 0 | 0 | 0 | 0 |
| 41.4970 | -3.6940 | 9.7650  | H | 0 | 0 | 0 | 0 | 0 | 0 | 0 | 0 | 0 | 0 | 0 | 0 |
| 41.2680 | -5.4180 | 10.0200 | H | 0 | 0 | 0 | 0 | 0 | 0 | 0 | 0 | 0 | 0 | 0 | 0 |
| 42.6480 | -4.5520 | 11.3420 | C | 0 | 0 | 0 | 0 | 0 | 0 | 0 | 0 | 0 | 0 | 0 | 0 |
| 43.1710 | -3.3120 | 11.5410 | O | 0 | 0 | 0 | 0 | 0 | 0 | 0 | 0 | 0 | 0 | 0 | 0 |
| 43.8650 | -3.1420 | 12.7820 | C | 0 | 0 | 0 | 0 | 0 | 0 | 0 | 0 | 0 | 0 | 0 | 0 |
| 43.1410 | -3.1530 | 13.6040 | H | 0 | 0 | 0 | 0 | 0 | 0 | 0 | 0 | 0 | 0 | 0 | 0 |
| 44.5870 | -3.9560 | 12.9190 | H | 0 | 0 | 0 | 0 | 0 | 0 | 0 | 0 | 0 | 0 | 0 | 0 |
| 44.5930 | -1.8050 | 12.7290 | C | 0 | 0 | 0 | 0 | 0 | 0 | 0 | 0 | 0 | 0 | 0 | 0 |
| 45.2240 | -1.7710 | 11.8320 | H | 0 | 0 | 0 | 0 | 0 | 0 | 0 | 0 | 0 | 0 | 0 | 0 |
| 43.8630 | -0.9940 | 12.6130 | H | 0 | 0 | 0 | 0 | 0 | 0 | 0 | 0 | 0 | 0 | 0 | 0 |
| 42.6970 | -5.4880 | 12.1290 | O | 0 | 0 | 0 | 0 | 0 | 0 | 0 | 0 | 0 | 0 | 0 | 0 |
| 45.4390 | -1.5860 | 13.9760 | C | 0 | 0 | 0 | 0 | 0 | 0 | 0 | 0 | 0 | 0 | 0 | 0 |
| 46.1500 | -2.4130 | 14.1000 | H | 0 | 0 | 0 | 0 | 0 | 0 | 0 | 0 | 0 | 0 | 0 | 0 |
| 44.8070 | -1.5990 | 14.8730 | H | 0 | 0 | 0 | 0 | 0 | 0 | 0 | 0 | 0 | 0 | 0 | 0 |
| 45.3920 | 6.3870  | 15.7150 | C | 0 | 0 | 0 | 0 | 0 | 0 | 0 | 0 | 0 | 0 | 0 | 0 |
| 45.6760 | 6.8280  | 16.6800 | H | 0 | 0 | 0 | 0 | 0 | 0 | 0 | 0 | 0 | 0 | 0 | 0 |
| 46.2350 | 6.5910  | 15.0400 | H | 0 | 0 | 0 | 0 | 0 | 0 | 0 | 0 | 0 | 0 | 0 | 0 |
| 45.1950 | 4.9300  | 15.8880 | N | 0 | 0 | 0 | 0 | 0 | 0 | 0 | 0 | 0 | 0 | 0 | 0 |
| 46.4110 | 4.3530  | 16.5100 | C | 0 | 0 | 0 | 0 | 0 | 0 | 0 | 0 | 0 | 0 | 0 | 0 |
| 47.2230 | 4.3040  | 15.7740 | H | 0 | 0 | 0 | 0 | 0 | 0 | 0 | 0 | 0 | 0 | 0 | 0 |
| 46.7530 | 5.0160  | 17.3160 | H | 0 | 0 | 0 | 0 | 0 | 0 | 0 | 0 | 0 | 0 | 0 | 0 |
| 46.1430 | 2.9730  | 17.1600 | C | 0 | 0 | 0 | 0 | 0 | 0 | 0 | 0 | 0 | 0 | 0 | 0 |
| 45.2530 | 3.1020  | 17.7860 | H | 0 | 0 | 0 | 0 | 0 | 0 | 0 | 0 | 0 | 0 | 0 | 0 |
| 45.8690 | 2.2240  | 16.4110 | H | 0 | 0 | 0 | 0 | 0 | 0 | 0 | 0 | 0 | 0 | 0 | 0 |
| 47.2630 | 2.5000  | 17.9980 | N | 0 | 0 | 3 | 0 | 0 | 0 | 0 | 0 | 0 | 0 | 0 | 0 |
| 44.8850 | 4.2640  | 14.6060 | C | 0 | 0 | 0 | 0 | 0 | 0 | 0 | 0 | 0 | 0 | 0 | 0 |
| 45.2030 | 4.8630  | 13.7420 | H | 0 | 0 | 0 | 0 | 0 | 0 | 0 | 0 | 0 | 0 | 0 | 0 |
| 45.4360 | 3.3220  | 14.4890 | H | 0 | 0 | 0 | 0 | 0 | 0 | 0 | 0 | 0 | 0 | 0 | 0 |
| 44.1580 | 7.1580  | 15.2310 | C | 0 | 0 | 0 | 0 | 0 | 0 | 0 | 0 | 0 | 0 | 0 | 0 |
| 43.8860 | 6.8790  | 14.2090 | H | 0 | 0 | 0 | 0 | 0 | 0 | 0 | 0 | 0 | 0 | 0 | 0 |
| 43.3060 | 6.9810  | 15.8940 | H | 0 | 0 | 0 | 0 | 0 | 0 | 0 | 0 | 0 | 0 | 0 | 0 |
| 44.4460 | 8.5540  | 15.2380 | O | 0 | 0 | 0 | 0 | 0 | 0 | 0 | 0 | 0 | 0 | 0 | 0 |
| 43.6440 | 9.0160  | 14.9350 | H | 0 | 0 | 0 | 0 | 0 | 0 | 0 | 0 | 0 | 0 | 0 | 0 |
| 43.3950 | 3.9260  | 14.5030 | C | 0 | 0 | 0 | 0 | 0 | 0 | 0 | 0 | 0 | 0 | 0 | 0 |
| 43.1140 | 3.1940  | 15.2670 | H | 0 | 0 | 0 | 0 | 0 | 0 | 0 | 0 | 0 | 0 | 0 | 0 |
| 42.7660 | 4.8120  | 14.6190 | H | 0 | 0 | 0 | 0 | 0 | 0 | 0 | 0 | 0 | 0 | 0 | 0 |
| 43.1260 | 3.3630  | 13.2210 | O | 0 | 0 | 0 | 0 | 0 | 0 | 0 | 0 | 0 | 0 | 0 | 0 |
| 42.1810 | 3.1370  | 13.2040 | H | 0 | 0 | 0 | 0 | 0 | 0 | 0 | 0 | 0 | 0 | 0 | 0 |
| 43.1160 | 0.8450  | 26.6250 | C | 0 | 0 | 0 | 0 | 0 | 0 | 0 | 0 | 0 | 0 | 0 | 0 |
| 42.2060 | 1.3570  | 26.2890 | H | 0 | 0 | 0 | 0 | 0 | 0 | 0 | 0 | 0 | 0 | 0 | 0 |
| 43.8120 | 1.5750  | 27.0540 | H | 0 | 0 | 0 | 0 | 0 | 0 | 0 | 0 | 0 | 0 | 0 | 0 |
| 42.7750 | -0.1320 | 27.6180 | O | 0 | 0 | 0 | 0 | 0 | 0 | 0 | 0 | 0 | 0 | 0 | 0 |
| 42.1730 | 0.3800  | 28.7300 | C | 0 | 0 | 0 | 0 | 0 | 0 | 0 | 0 | 0 | 0 | 0 | 0 |
| 41.8680 | -0.7430 | 29.6920 | C | 0 | 0 | 0 | 0 | 0 | 0 | 0 | 0 | 0 | 0 | 0 | 0 |
| 41.2140 | -1.4630 | 29.1880 | H | 0 | 0 | 0 | 0 | 0 | 0 | 0 | 0 | 0 | 0 | 0 | 0 |
| 42.8080 | -1.2370 | 29.9580 | H | 0 | 0 | 0 | 0 | 0 | 0 | 0 | 0 | 0 | 0 | 0 | 0 |
| 41.1870 | -0.2440 | 30.9540 | C | 0 | 0 | 0 | 0 | 0 | 0 | 0 | 0 | 0 | 0 | 0 | 0 |
| 41.8190 | 0.4760  | 31.4840 | H | 0 | 0 | 0 | 0 | 0 | 0 | 0 | 0 | 0 | 0 | 0 | 0 |
| 40.9780 | -1.0780 | 31.6310 | H | 0 | 0 | 0 | 0 | 0 | 0 | 0 | 0 | 0 | 0 | 0 | 0 |
| 40.2390 | 0.2520  | 30.7200 | H | 0 | 0 | 0 | 0 | 0 | 0 | 0 | 0 | 0 | 0 | 0 | 0 |
| 41.9220 | 1.5620  | 28.9150 | O | 0 | 0 | 0 | 0 | 0 | 0 | 0 | 0 | 0 | 0 | 0 | 0 |
| 46.8670 | 1.4120  | 18.9080 | C | 0 | 0 | 0 | 0 | 0 | 0 | 0 | 0 | 0 | 0 | 0 | 0 |
| 46.3130 | 0.6320  | 18.3700 | H | 0 | 0 | 0 | 0 | 0 | 0 | 0 | 0 | 0 | 0 | 0 | 0 |
| 47.7670 | 0.9300  | 19.3160 | H | 0 | 0 | 0 | 0 | 0 | 0 | 0 | 0 | 0 | 0 | 0 | 0 |
| 46.0550 | 1.9260  | 20.1000 | C | 0 | 0 | 0 | 0 | 0 | 0 | 0 | 0 | 0 | 0 | 0 | 0 |
| 46.6260 | 2.6990  | 20.6280 | H | 0 | 0 | 0 | 0 | 0 | 0 | 0 | 0 | 0 | 0 | 0 | 0 |
| 45.0960 | 2.3440  | 19.7810 | H | 0 | 0 | 0 | 0 | 0 | 0 | 0 | 0 | 0 | 0 | 0 | 0 |
| 45.7600 | 0.8110  | 21.0700 | C | 0 | 0 | 0 | 0 | 0 | 0 | 0 | 0 | 0 | 0 | 0 | 0 |
| 45.1640 | 1.3270  | 22.1830 | O | 0 | 0 | 0 | 0 | 0 | 0 | 0 | 0 | 0 | 0 | 0 | 0 |
| 44.8220 | 0.3530  | 23.1780 | C | 0 | 0 | 0 | 0 | 0 | 0 | 0 | 0 | 0 | 0 | 0 | 0 |
| 44.1240 | -0.3760 | 22.7510 | H | 0 | 0 | 0 | 0 | 0 | 0 | 0 | 0 | 0 | 0 | 0 | 0 |
| 45.7300 | -0.1600 | 23.5140 | H | 0 | 0 | 0 | 0 | 0 | 0 | 0 | 0 | 0 | 0 | 0 | 0 |
| 44.1690 | 1.0830  | 24.3460 | C | 0 | 0 | 0 | 0 | 0 | 0 | 0 | 0 | 0 | 0 | 0 | 0 |
| 44.8600 | 1.8420  | 24.7320 | H | 0 | 0 | 0 | 0 | 0 | 0 | 0 | 0 | 0 | 0 | 0 | 0 |
| 43.2900 | 1.6320  | 23.9860 | H | 0 | 0 | 0 | 0 | 0 | 0 | 0 | 0 | 0 | 0 | 0 | 0 |
| 46.0020 | -0.3730 | 20.8820 | O | 0 | 0 | 0 | 0 | 0 | 0 | 0 | 0 | 0 | 0 | 0 | 0 |
| 43.7700 | 0.1180  | 25.4570 | C | 0 | 0 | 0 | 0 | 0 | 0 | 0 | 0 | 0 | 0 | 0 | 0 |
| 44.6490 | -0.4310 | 25.8170 | H | 0 | 0 | 0 | 0 | 0 | 0 | 0 | 0 | 0 | 0 | 0 | 0 |
| 43.0800 | -0.6430 | 25.0700 | H | 0 | 0 | 0 | 0 | 0 | 0 | 0 | 0 | 0 | 0 | 0 | 0 |
| 1 2     | 1       | 0       | 0 | 0 | 0 | 0 | 0 | 0 | 0 | 0 | 0 | 0 | 0 | 0 | 0 |
| 1 3     | 1       | 0       | 0 | 0 | 0 | 0 | 0 | 0 | 0 | 0 | 0 | 0 | 0 | 0 | 0 |
| 1 4     | 1       | 0       | 0 | 0 | 0 | 0 | 0 | 0 | 0 | 0 | 0 | 0 | 0 | 0 | 0 |
| 1 16    | 1       | 0       | 0 | 0 | 0 | 0 | 0 | 0 | 0 | 0 | 0 | 0 | 0 | 0 | 0 |
| 4 5     | 1       | 0       | 0 | 0 | 0 | 0 | 0 | 0 | 0 | 0 | 0 | 0 | 0 | 0 | 0 |
| 4 13    | 1       | 0       | 0 | 0 | 0 | 0 | 0 | 0 | 0 | 0 | 0 | 0 | 0 | 0 | 0 |
| 5 6     | 1       | 0       | 0 | 0 | 0 | 0 | 0 | 0 | 0 | 0 | 0 | 0 | 0 | 0 | 0 |
| 5 7     | 1       | 0       | 0 | 0 | 0 | 0 | 0 | 0 | 0 | 0 | 0 | 0 | 0 | 0 | 0 |
| 5 8     | 1       | 0       | 0 | 0 | 0 | 0 | 0 | 0 | 0 | 0 | 0 | 0 | 0 | 0 | 0 |
| 8 9     | 1       | 0       | 0 | 0 | 0 | 0 | 0 | 0 | 0 | 0 | 0 | 0 | 0 | 0 | 0 |
| 8 10    | 1       | 0       | 0 | 0 | 0 | 0 | 0 | 0 | 0 | 0 | 0 | 0 | 0 | 0 | 0 |

|    |     |   |   |   |   |   |
|----|-----|---|---|---|---|---|
| 8  | 11  | 1 | 0 | 0 | 0 | 0 |
| 11 | 12  | 1 | 0 | 0 | 0 | 0 |
| 11 | 38  | 1 | 0 | 0 | 0 | 0 |
| 13 | 14  | 1 | 0 | 0 | 0 | 0 |
| 13 | 15  | 1 | 0 | 0 | 0 | 0 |
| 13 | 21  | 1 | 0 | 0 | 0 | 0 |
| 16 | 17  | 1 | 0 | 0 | 0 | 0 |
| 16 | 18  | 1 | 0 | 0 | 0 | 0 |
| 16 | 19  | 1 | 0 | 0 | 0 | 0 |
| 19 | 20  | 1 | 0 | 0 | 0 | 0 |
| 21 | 22  | 1 | 0 | 0 | 0 | 0 |
| 21 | 23  | 1 | 0 | 0 | 0 | 0 |
| 21 | 24  | 1 | 0 | 0 | 0 | 0 |
| 24 | 25  | 1 | 0 | 0 | 0 | 0 |
| 26 | 27  | 1 | 0 | 0 | 0 | 0 |
| 26 | 28  | 1 | 0 | 0 | 0 | 0 |
| 26 | 29  | 1 | 0 | 0 | 0 | 0 |
| 26 | 53  | 1 | 0 | 0 | 0 | 0 |
| 29 | 30  | 1 | 0 | 0 | 0 | 0 |
| 30 | 31  | 1 | 0 | 0 | 0 | 0 |
| 30 | 37  | 2 | 0 | 0 | 0 | 0 |
| 31 | 32  | 1 | 0 | 0 | 0 | 0 |
| 31 | 33  | 1 | 0 | 0 | 0 | 0 |
| 31 | 34  | 1 | 0 | 0 | 0 | 0 |
| 34 | 35  | 1 | 0 | 0 | 0 | 0 |
| 34 | 36  | 1 | 0 | 0 | 0 | 0 |
| 34 | 66  | 1 | 0 | 0 | 0 | 0 |
| 38 | 39  | 1 | 0 | 0 | 0 | 0 |
| 38 | 40  | 1 | 0 | 0 | 0 | 0 |
| 38 | 41  | 1 | 0 | 0 | 0 | 0 |
| 41 | 42  | 1 | 0 | 0 | 0 | 0 |
| 41 | 43  | 1 | 0 | 0 | 0 | 0 |
| 41 | 44  | 1 | 0 | 0 | 0 | 0 |
| 44 | 45  | 1 | 0 | 0 | 0 | 0 |
| 44 | 52  | 2 | 0 | 0 | 0 | 0 |
| 45 | 46  | 1 | 0 | 0 | 0 | 0 |
| 46 | 47  | 1 | 0 | 0 | 0 | 0 |
| 46 | 48  | 1 | 0 | 0 | 0 | 0 |
| 46 | 49  | 1 | 0 | 0 | 0 | 0 |
| 49 | 50  | 1 | 0 | 0 | 0 | 0 |
| 49 | 51  | 1 | 0 | 0 | 0 | 0 |
| 49 | 53  | 1 | 0 | 0 | 0 | 0 |
| 53 | 54  | 1 | 0 | 0 | 0 | 0 |
| 53 | 55  | 1 | 0 | 0 | 0 | 0 |
| 56 | 57  | 1 | 0 | 0 | 0 | 0 |
| 56 | 58  | 1 | 0 | 0 | 0 | 0 |
| 56 | 59  | 1 | 0 | 0 | 0 | 0 |
| 56 | 70  | 1 | 0 | 0 | 0 | 0 |
| 59 | 60  | 1 | 0 | 0 | 0 | 0 |
| 59 | 67  | 1 | 0 | 0 | 0 | 0 |
| 60 | 61  | 1 | 0 | 0 | 0 | 0 |
| 60 | 62  | 1 | 0 | 0 | 0 | 0 |
| 60 | 63  | 1 | 0 | 0 | 0 | 0 |
| 63 | 64  | 1 | 0 | 0 | 0 | 0 |
| 63 | 65  | 1 | 0 | 0 | 0 | 0 |
| 63 | 66  | 1 | 0 | 0 | 0 | 0 |
| 66 | 92  | 1 | 0 | 0 | 0 | 0 |
| 67 | 68  | 1 | 0 | 0 | 0 | 0 |
| 67 | 69  | 1 | 0 | 0 | 0 | 0 |
| 67 | 75  | 1 | 0 | 0 | 0 | 0 |
| 70 | 71  | 1 | 0 | 0 | 0 | 0 |
| 70 | 72  | 1 | 0 | 0 | 0 | 0 |
| 70 | 73  | 1 | 0 | 0 | 0 | 0 |
| 73 | 74  | 1 | 0 | 0 | 0 | 0 |
| 75 | 76  | 1 | 0 | 0 | 0 | 0 |
| 75 | 77  | 1 | 0 | 0 | 0 | 0 |
| 75 | 78  | 1 | 0 | 0 | 0 | 0 |
| 78 | 79  | 1 | 0 | 0 | 0 | 0 |
| 80 | 81  | 1 | 0 | 0 | 0 | 0 |
| 80 | 82  | 1 | 0 | 0 | 0 | 0 |
| 80 | 83  | 1 | 0 | 0 | 0 | 0 |
| 80 | 107 | 1 | 0 | 0 | 0 | 0 |
| 83 | 84  | 1 | 0 | 0 | 0 | 0 |
| 84 | 85  | 1 | 0 | 0 | 0 | 0 |
| 84 | 91  | 2 | 0 | 0 | 0 | 0 |
| 85 | 86  | 1 | 0 | 0 | 0 | 0 |
| 85 | 87  | 1 | 0 | 0 | 0 | 0 |
| 85 | 88  | 1 | 0 | 0 | 0 | 0 |
| 88 | 89  | 1 | 0 | 0 | 0 | 0 |
| 88 | 90  | 1 | 0 | 0 | 0 | 0 |
| 88 | 120 | 1 | 0 | 0 | 0 | 0 |

|     |     |   |   |   |   |   |
|-----|-----|---|---|---|---|---|
| 92  | 93  | 1 | 0 | 0 | 0 | 0 |
| 92  | 94  | 1 | 0 | 0 | 0 | 0 |
| 92  | 95  | 1 | 0 | 0 | 0 | 0 |
| 95  | 96  | 1 | 0 | 0 | 0 | 0 |
| 95  | 97  | 1 | 0 | 0 | 0 | 0 |
| 95  | 98  | 1 | 0 | 0 | 0 | 0 |
| 98  | 99  | 1 | 0 | 0 | 0 | 0 |
| 98  | 106 | 2 | 0 | 0 | 0 | 0 |
| 99  | 100 | 1 | 0 | 0 | 0 | 0 |
| 100 | 101 | 1 | 0 | 0 | 0 | 0 |
| 100 | 102 | 1 | 0 | 0 | 0 | 0 |
| 100 | 103 | 1 | 0 | 0 | 0 | 0 |
| 103 | 104 | 1 | 0 | 0 | 0 | 0 |
| 103 | 105 | 1 | 0 | 0 | 0 | 0 |
| 103 | 107 | 1 | 0 | 0 | 0 | 0 |
| 107 | 108 | 1 | 0 | 0 | 0 | 0 |
| 107 | 109 | 1 | 0 | 0 | 0 | 0 |
| 110 | 111 | 1 | 0 | 0 | 0 | 0 |
| 110 | 112 | 1 | 0 | 0 | 0 | 0 |
| 110 | 113 | 1 | 0 | 0 | 0 | 0 |
| 110 | 124 | 1 | 0 | 0 | 0 | 0 |
| 113 | 114 | 1 | 0 | 0 | 0 | 0 |
| 113 | 121 | 1 | 0 | 0 | 0 | 0 |
| 114 | 115 | 1 | 0 | 0 | 0 | 0 |
| 114 | 116 | 1 | 0 | 0 | 0 | 0 |
| 114 | 117 | 1 | 0 | 0 | 0 | 0 |
| 117 | 118 | 1 | 0 | 0 | 0 | 0 |
| 117 | 119 | 1 | 0 | 0 | 0 | 0 |
| 117 | 120 | 1 | 0 | 0 | 0 | 0 |
| 120 | 146 | 1 | 0 | 0 | 0 | 0 |
| 121 | 122 | 1 | 0 | 0 | 0 | 0 |
| 121 | 123 | 1 | 0 | 0 | 0 | 0 |
| 121 | 129 | 1 | 0 | 0 | 0 | 0 |
| 124 | 125 | 1 | 0 | 0 | 0 | 0 |
| 124 | 126 | 1 | 0 | 0 | 0 | 0 |
| 124 | 127 | 1 | 0 | 0 | 0 | 0 |
| 127 | 128 | 1 | 0 | 0 | 0 | 0 |
| 129 | 130 | 1 | 0 | 0 | 0 | 0 |
| 129 | 131 | 1 | 0 | 0 | 0 | 0 |
| 129 | 132 | 1 | 0 | 0 | 0 | 0 |
| 132 | 133 | 1 | 0 | 0 | 0 | 0 |
| 134 | 135 | 1 | 0 | 0 | 0 | 0 |
| 134 | 136 | 1 | 0 | 0 | 0 | 0 |
| 134 | 137 | 1 | 0 | 0 | 0 | 0 |
| 134 | 161 | 1 | 0 | 0 | 0 | 0 |
| 137 | 138 | 1 | 0 | 0 | 0 | 0 |
| 138 | 139 | 1 | 0 | 0 | 0 | 0 |
| 138 | 145 | 2 | 0 | 0 | 0 | 0 |
| 139 | 140 | 1 | 0 | 0 | 0 | 0 |
| 139 | 141 | 1 | 0 | 0 | 0 | 0 |
| 139 | 142 | 1 | 0 | 0 | 0 | 0 |
| 142 | 143 | 1 | 0 | 0 | 0 | 0 |
| 142 | 144 | 1 | 0 | 0 | 0 | 0 |
| 142 | 174 | 1 | 0 | 0 | 0 | 0 |
| 146 | 147 | 1 | 0 | 0 | 0 | 0 |
| 146 | 148 | 1 | 0 | 0 | 0 | 0 |
| 146 | 149 | 1 | 0 | 0 | 0 | 0 |
| 149 | 150 | 1 | 0 | 0 | 0 | 0 |
| 149 | 151 | 1 | 0 | 0 | 0 | 0 |
| 149 | 152 | 1 | 0 | 0 | 0 | 0 |
| 152 | 153 | 1 | 0 | 0 | 0 | 0 |
| 152 | 160 | 2 | 0 | 0 | 0 | 0 |
| 153 | 154 | 1 | 0 | 0 | 0 | 0 |
| 154 | 155 | 1 | 0 | 0 | 0 | 0 |
| 154 | 156 | 1 | 0 | 0 | 0 | 0 |
| 154 | 157 | 1 | 0 | 0 | 0 | 0 |
| 157 | 158 | 1 | 0 | 0 | 0 | 0 |
| 157 | 159 | 1 | 0 | 0 | 0 | 0 |
| 157 | 161 | 1 | 0 | 0 | 0 | 0 |
| 161 | 162 | 1 | 0 | 0 | 0 | 0 |
| 161 | 163 | 1 | 0 | 0 | 0 | 0 |
| 164 | 165 | 1 | 0 | 0 | 0 | 0 |
| 164 | 166 | 1 | 0 | 0 | 0 | 0 |
| 164 | 167 | 1 | 0 | 0 | 0 | 0 |
| 164 | 178 | 1 | 0 | 0 | 0 | 0 |
| 167 | 168 | 1 | 0 | 0 | 0 | 0 |
| 167 | 175 | 1 | 0 | 0 | 0 | 0 |
| 168 | 169 | 1 | 0 | 0 | 0 | 0 |
| 168 | 170 | 1 | 0 | 0 | 0 | 0 |
| 168 | 171 | 1 | 0 | 0 | 0 | 0 |
| 171 | 172 | 1 | 0 | 0 | 0 | 0 |



|        |   |   |   |   |   |
|--------|---|---|---|---|---|
| 171173 | 1 | 0 | 0 | 0 | 0 |
| 171174 | 1 | 0 | 0 | 0 | 0 |
| 174200 | 1 | 0 | 0 | 0 | 0 |
| 175176 | 1 | 0 | 0 | 0 | 0 |
| 175177 | 1 | 0 | 0 | 0 | 0 |
| 175183 | 1 | 0 | 0 | 0 | 0 |
| 178179 | 1 | 0 | 0 | 0 | 0 |
| 178180 | 1 | 0 | 0 | 0 | 0 |
| 178181 | 1 | 0 | 0 | 0 | 0 |
| 181182 | 1 | 0 | 0 | 0 | 0 |
| 183184 | 1 | 0 | 0 | 0 | 0 |
| 183185 | 1 | 0 | 0 | 0 | 0 |
| 183186 | 1 | 0 | 0 | 0 | 0 |
| 186187 | 1 | 0 | 0 | 0 | 0 |
| 188189 | 1 | 0 | 0 | 0 | 0 |
| 188190 | 1 | 0 | 0 | 0 | 0 |
| 188191 | 1 | 0 | 0 | 0 | 0 |
| 188215 | 1 | 0 | 0 | 0 | 0 |
| 191192 | 1 | 0 | 0 | 0 | 0 |
| 192193 | 1 | 0 | 0 | 0 | 0 |
| 192199 | 2 | 0 | 0 | 0 | 0 |
| 193194 | 1 | 0 | 0 | 0 | 0 |
| 193195 | 1 | 0 | 0 | 0 | 0 |
| 193196 | 1 | 0 | 0 | 0 | 0 |
| 196197 | 1 | 0 | 0 | 0 | 0 |
| 196198 | 1 | 0 | 0 | 0 | 0 |
| 196228 | 1 | 0 | 0 | 0 | 0 |
| 200201 | 1 | 0 | 0 | 0 | 0 |
| 200202 | 1 | 0 | 0 | 0 | 0 |
| 200203 | 1 | 0 | 0 | 0 | 0 |
| 203204 | 1 | 0 | 0 | 0 | 0 |
| 203205 | 1 | 0 | 0 | 0 | 0 |
| 203206 | 1 | 0 | 0 | 0 | 0 |
| 206207 | 1 | 0 | 0 | 0 | 0 |
| 206214 | 2 | 0 | 0 | 0 | 0 |
| 207208 | 1 | 0 | 0 | 0 | 0 |
| 208209 | 1 | 0 | 0 | 0 | 0 |
| 208210 | 1 | 0 | 0 | 0 | 0 |
| 208211 | 1 | 0 | 0 | 0 | 0 |
| 211212 | 1 | 0 | 0 | 0 | 0 |
| 211213 | 1 | 0 | 0 | 0 | 0 |
| 211215 | 1 | 0 | 0 | 0 | 0 |
| 215216 | 1 | 0 | 0 | 0 | 0 |
| 215217 | 1 | 0 | 0 | 0 | 0 |
| 218219 | 1 | 0 | 0 | 0 | 0 |
| 218220 | 1 | 0 | 0 | 0 | 0 |
| 218221 | 1 | 0 | 0 | 0 | 0 |
| 218232 | 1 | 0 | 0 | 0 | 0 |
| 221222 | 1 | 0 | 0 | 0 | 0 |
| 221229 | 1 | 0 | 0 | 0 | 0 |
| 222223 | 1 | 0 | 0 | 0 | 0 |
| 222224 | 1 | 0 | 0 | 0 | 0 |
| 222225 | 1 | 0 | 0 | 0 | 0 |
| 225226 | 1 | 0 | 0 | 0 | 0 |
| 225227 | 1 | 0 | 0 | 0 | 0 |
| 225228 | 1 | 0 | 0 | 0 | 0 |
| 228255 | 1 | 0 | 0 | 0 | 0 |
| 229230 | 1 | 0 | 0 | 0 | 0 |
| 229231 | 1 | 0 | 0 | 0 | 0 |
| 229237 | 1 | 0 | 0 | 0 | 0 |
| 232233 | 1 | 0 | 0 | 0 | 0 |
| 232234 | 1 | 0 | 0 | 0 | 0 |
| 232235 | 1 | 0 | 0 | 0 | 0 |
| 235236 | 1 | 0 | 0 | 0 | 0 |
| 237238 | 1 | 0 | 0 | 0 | 0 |
| 237239 | 1 | 0 | 0 | 0 | 0 |
| 237240 | 1 | 0 | 0 | 0 | 0 |
| 240241 | 1 | 0 | 0 | 0 | 0 |
| 242243 | 1 | 0 | 0 | 0 | 0 |
| 242244 | 1 | 0 | 0 | 0 | 0 |
| 242245 | 1 | 0 | 0 | 0 | 0 |
| 242270 | 1 | 0 | 0 | 0 | 0 |
| 245246 | 1 | 0 | 0 | 0 | 0 |
| 246247 | 1 | 0 | 0 | 0 | 0 |
| 246254 | 2 | 0 | 0 | 0 | 0 |
| 247248 | 1 | 0 | 0 | 0 | 0 |
| 247249 | 1 | 0 | 0 | 0 | 0 |
| 247250 | 1 | 0 | 0 | 0 | 0 |
| 250251 | 1 | 0 | 0 | 0 | 0 |
| 250252 | 1 | 0 | 0 | 0 | 0 |
| 250253 | 1 | 0 | 0 | 0 | 0 |

255256 1 0 0 0 0  
255257 1 0 0 0 0  
255258 1 0 0 0 0  
258259 1 0 0 0 0  
258260 1 0 0 0 0  
258261 1 0 0 0 0  
261262 1 0 0 0 0  
261269 2 0 0 0 0  
262263 1 0 0 0 0  
263264 1 0 0 0 0  
263265 1 0 0 0 0  
263266 1 0 0 0 0  
266267 1 0 0 0 0  
266268 1 0 0 0 0  
266270 1 0 0 0 0  
270271 1 0 0 0 0  
270272 1 0 0 0 0

M END  
> <NAME>  
C86\_1

\$\$\$  
D24\_1  
MOE2012 3D

372381 0 0 1 0 0 0 0 0999 V2000  
29.3020 29.1620 -31.2160 O 0 0 0 0 0 0 0 0 0 0 0 0 0 0 0 0  
28.4920 29.1540 -31.7570 H 0 0 0 0 0 0 0 0 0 0 0 0 0 0 0 0  
29.0630 28.3060 -30.0950 C 0 0 0 0 0 0 0 0 0 0 0 0 0 0 0 0  
28.1750 28.6560 -29.5610 H 0 0 0 0 0 0 0 0 0 0 0 0 0 0 0 0  
28.8880 27.2980 -30.4830 H 0 0 0 0 0 0 0 0 0 0 0 0 0 0 0 0  
30.3020 28.3470 -29.2030 C 0 0 0 3 0 0 0 0 0 0 0 0 0 0 0 0  
30.4790 29.3740 -28.8590 H 0 0 0 0 0 0 0 0 0 0 0 0 0 0 0 0  
30.1830 27.3840 -28.0140 C 0 0 0 0 0 0 0 0 0 0 0 0 0 0 0 0  
29.3000 27.6300 -27.4140 H 0 0 0 0 0 0 0 0 0 0 0 0 0 0 0 0  
30.0770 26.3600 -28.3950 H 0 0 0 0 0 0 0 0 0 0 0 0 0 0 0 0  
31.3940 27.4780 -27.1870 N 0 0 0 3 0 0 0 0 0 0 0 0 0 0 0 0  
32.1960 27.4060 -27.8220 H 0 0 0 0 0 0 0 0 0 0 0 0 0 0 0 0  
31.4380 27.9740 -30.0010 O 0 0 0 0 0 0 0 0 0 0 0 0 0 0 0 0  
31.3190 28.4750 -30.8340 H 0 0 0 0 0 0 0 0 0 0 0 0 0 0 0 0  
31.0710 17.5130 -12.3480 C 0 0 0 0 0 0 0 0 0 0 0 0 0 0 0 0  
32.0630 17.8550 -12.6620 H 0 0 0 0 0 0 0 0 0 0 0 0 0 0 0 0  
30.7270 16.8380 -13.1420 H 0 0 0 0 0 0 0 0 0 0 0 0 0 0 0 0  
31.2370 16.8130 -11.1040 O 0 0 0 0 0 0 0 0 0 0 0 0 0 0 0 0  
30.2740 15.8930 -10.8040 C 0 0 0 0 0 0 0 0 0 0 0 0 0 0 0 0  
30.5850 15.2560 -9.4700 C 0 0 0 0 0 0 0 0 0 0 0 0 0 0 0 0  
31.5130 14.6870 -9.5890 H 0 0 0 0 0 0 0 0 0 0 0 0 0 0 0 0  
30.7450 16.0570 -8.7410 H 0 0 0 0 0 0 0 0 0 0 0 0 0 0 0 0  
29.4360 14.3490 -9.0120 C 0 0 0 0 0 0 0 0 0 0 0 0 0 0 0 0  
28.5170 14.9480 -8.9350 H 0 0 0 0 0 0 0 0 0 0 0 0 0 0 0 0  
29.2010 13.6230 -9.8010 H 0 0 0 0 0 0 0 0 0 0 0 0 0 0 0 0  
29.3090 15.6320 -11.5080 O 0 0 0 0 0 0 0 0 0 0 0 0 0 0 0 0  
30.1280 18.7000 -12.1800 C 0 0 0 0 0 0 0 0 0 0 0 0 0 0 0 0  
29.1400 18.3310 -11.8790 H 0 0 0 0 0 0 0 0 0 0 0 0 0 0 0 0  
30.4350 19.3610 -11.3610 H 0 0 0 0 0 0 0 0 0 0 0 0 0 0 0 0  
31.4430 26.4180 -26.1800 C 0 0 0 0 0 0 0 0 0 0 0 0 0 0 0 0  
30.5700 26.4880 -25.5210 H 0 0 0 0 0 0 0 0 0 0 0 0 0 0 0 0  
31.4190 25.4320 -26.6610 H 0 0 0 0 0 0 0 0 0 0 0 0 0 0 0 0  
32.7200 26.5580 -25.3570 C 0 0 0 0 0 0 0 0 0 0 0 0 0 0 0 0  
33.5950 26.4970 -26.0160 H 0 0 0 0 0 0 0 0 0 0 0 0 0 0 0 0  
32.7340 27.5200 -24.8330 H 0 0 0 0 0 0 0 0 0 0 0 0 0 0 0 0  
32.8300 25.4610 -24.3290 C 0 0 0 0 0 0 0 0 0 0 0 0 0 0 0 0  
34.0650 25.5070 -23.7510 O 0 0 0 0 0 0 0 0 0 0 0 0 0 0 0 0  
34.3450 24.4820 -22.7860 C 0 0 0 0 0 0 0 0 0 0 0 0 0 0 0 0  
33.9630 23.5090 -23.1180 H 0 0 0 0 0 0 0 0 0 0 0 0 0 0 0 0  
35.4340 24.3720 -22.7360 H 0 0 0 0 0 0 0 0 0 0 0 0 0 0 0 0  
33.8030 24.8560 -21.4110 C 0 0 0 0 0 0 0 0 0 0 0 0 0 0 0 0  
34.2190 25.8260 -21.1130 H 0 0 0 0 0 0 0 0 0 0 0 0 0 0 0 0  
32.7100 24.9380 -21.4520 H 0 0 0 0 0 0 0 0 0 0 0 0 0 0 0 0  
31.9500 24.6630 -24.0410 O 0 0 0 0 0 0 0 0 0 0 0 0 0 0 0 0  
34.1920 23.8360 -20.4930 O 0 0 0 0 0 0 0 0 0 0 0 0 0 0 0 0  
33.8210 23.9940 -19.1870 C 0 0 0 0 0 0 0 0 0 0 0 0 0 0 0 0  
34.2480 22.9790 -18.3310 C 0 0 0 0 0 0 0 0 0 0 0 0 0 0 0 0  
34.8270 22.1480 -18.7260 H 0 0 0 0 0 0 0 0 0 0 0 0 0 0 0 0  
33.9400 23.0200 -16.9680 C 0 0 0 0 0 0 0 0 0 0 0 0 0 0 0 0  
34.2890 22.2070 -16.3340 H 0 0 0 0 0 0 0 0 0 0 0 0 0 0 0 0  
33.1930 24.0800 -16.4200 C 0 0 0 0 0 0 0 0 0 0 0 0 0 0 0 0  
32.7710 25.0920 -17.2960 C 0 0 0 0 0 0 0 0 0 0 0 0 0 0 0 0  
32.1940 25.9430 -16.9420 H 0 0 0 0 0 0 0 0 0 0 0 0 0 0 0 0  
33.0800 25.0500 -18.6630 C 0 0 0 0 0 0 0 0 0 0 0 0 0 0 0 0  
32.7230 25.8630 -19.2860 H 0 0 0 0 0 0 0 0 0 0 0 0 0 0 0 0









|    |    |   |   |   |   |   |
|----|----|---|---|---|---|---|
| 6  | 13 | 1 | 0 | 0 | 0 | 0 |
| 8  | 9  | 1 | 0 | 0 | 0 | 0 |
| 8  | 10 | 1 | 0 | 0 | 0 | 0 |
| 8  | 11 | 1 | 0 | 0 | 0 | 0 |
| 11 | 12 | 1 | 0 | 0 | 0 | 0 |
| 11 | 30 | 1 | 0 | 0 | 0 | 0 |
| 13 | 14 | 1 | 0 | 0 | 0 | 0 |
| 15 | 16 | 1 | 0 | 0 | 0 | 0 |
| 15 | 17 | 1 | 0 | 0 | 0 | 0 |
| 15 | 18 | 1 | 0 | 0 | 0 | 0 |
| 15 | 27 | 1 | 0 | 0 | 0 | 0 |
| 18 | 19 | 1 | 0 | 0 | 0 | 0 |
| 19 | 20 | 1 | 0 | 0 | 0 | 0 |
| 19 | 26 | 2 | 0 | 0 | 0 | 0 |
| 20 | 21 | 1 | 0 | 0 | 0 | 0 |
| 20 | 22 | 1 | 0 | 0 | 0 | 0 |
| 20 | 23 | 1 | 0 | 0 | 0 | 0 |
| 23 | 24 | 1 | 0 | 0 | 0 | 0 |
| 23 | 25 | 1 | 0 | 0 | 0 | 0 |
| 23 | 86 | 1 | 0 | 0 | 0 | 0 |
| 27 | 28 | 1 | 0 | 0 | 0 | 0 |
| 27 | 29 | 1 | 0 | 0 | 0 | 0 |
| 27 | 75 | 1 | 0 | 0 | 0 | 0 |
| 30 | 31 | 1 | 0 | 0 | 0 | 0 |
| 30 | 32 | 1 | 0 | 0 | 0 | 0 |
| 30 | 33 | 1 | 0 | 0 | 0 | 0 |
| 33 | 34 | 1 | 0 | 0 | 0 | 0 |
| 33 | 35 | 1 | 0 | 0 | 0 | 0 |
| 33 | 36 | 1 | 0 | 0 | 0 | 0 |
| 36 | 37 | 1 | 0 | 0 | 0 | 0 |
| 36 | 44 | 2 | 0 | 0 | 0 | 0 |
| 37 | 38 | 1 | 0 | 0 | 0 | 0 |
| 38 | 39 | 1 | 0 | 0 | 0 | 0 |
| 38 | 40 | 1 | 0 | 0 | 0 | 0 |
| 38 | 41 | 1 | 0 | 0 | 0 | 0 |
| 41 | 42 | 1 | 0 | 0 | 0 | 0 |
| 41 | 43 | 1 | 0 | 0 | 0 | 0 |
| 41 | 45 | 1 | 0 | 0 | 0 | 0 |
| 45 | 46 | 1 | 0 | 0 | 0 | 0 |
| 46 | 47 | 1 | 0 | 0 | 0 | 0 |
| 46 | 54 | 2 | 0 | 0 | 0 | 0 |
| 47 | 48 | 1 | 0 | 0 | 0 | 0 |
| 47 | 49 | 2 | 0 | 0 | 0 | 0 |
| 49 | 50 | 1 | 0 | 0 | 0 | 0 |
| 49 | 51 | 1 | 0 | 0 | 0 | 0 |
| 51 | 52 | 2 | 0 | 0 | 0 | 0 |
| 51 | 56 | 1 | 0 | 0 | 0 | 0 |
| 52 | 53 | 1 | 0 | 0 | 0 | 0 |
| 52 | 54 | 1 | 0 | 0 | 0 | 0 |
| 54 | 55 | 1 | 0 | 0 | 0 | 0 |
| 56 | 57 | 1 | 0 | 0 | 0 | 0 |
| 56 | 58 | 1 | 0 | 0 | 0 | 0 |
| 56 | 62 | 1 | 0 | 0 | 0 | 0 |
| 57 | 66 | 1 | 0 | 0 | 0 | 0 |
| 57 | 73 | 2 | 0 | 0 | 0 | 0 |
| 58 | 59 | 1 | 0 | 0 | 0 | 0 |
| 58 | 60 | 1 | 0 | 0 | 0 | 0 |
| 58 | 61 | 1 | 0 | 0 | 0 | 0 |
| 62 | 63 | 1 | 0 | 0 | 0 | 0 |
| 62 | 64 | 1 | 0 | 0 | 0 | 0 |
| 62 | 65 | 1 | 0 | 0 | 0 | 0 |
| 66 | 67 | 1 | 0 | 0 | 0 | 0 |
| 66 | 68 | 2 | 0 | 0 | 0 | 0 |
| 68 | 69 | 1 | 0 | 0 | 0 | 0 |
| 68 | 70 | 1 | 0 | 0 | 0 | 0 |
| 70 | 71 | 2 | 0 | 0 | 0 | 0 |
| 70 | 75 | 1 | 0 | 0 | 0 | 0 |
| 71 | 72 | 1 | 0 | 0 | 0 | 0 |
| 71 | 73 | 1 | 0 | 0 | 0 | 0 |
| 73 | 74 | 1 | 0 | 0 | 0 | 0 |
| 76 | 77 | 1 | 0 | 0 | 0 | 0 |
| 76 | 78 | 1 | 0 | 0 | 0 | 0 |
| 78 | 79 | 1 | 0 | 0 | 0 | 0 |
| 78 | 80 | 1 | 0 | 0 | 0 | 0 |
| 78 | 81 | 1 | 0 | 0 | 0 | 0 |
| 81 | 82 | 1 | 0 | 0 | 0 | 0 |
| 81 | 83 | 1 | 0 | 0 | 0 | 0 |
| 81 | 87 | 1 | 0 | 0 | 0 | 0 |
| 83 | 84 | 1 | 0 | 0 | 0 | 0 |
| 83 | 85 | 1 | 0 | 0 | 0 | 0 |
| 83 | 86 | 1 | 0 | 0 | 0 | 0 |

|        |   |   |   |   |   |
|--------|---|---|---|---|---|
| 86104  | 1 | 0 | 0 | 0 | 0 |
| 87 88  | 1 | 0 | 0 | 0 | 0 |
| 89 90  | 1 | 0 | 0 | 0 | 0 |
| 89 91  | 1 | 0 | 0 | 0 | 0 |
| 89 92  | 1 | 0 | 0 | 0 | 0 |
| 89101  | 1 | 0 | 0 | 0 | 0 |
| 92 93  | 1 | 0 | 0 | 0 | 0 |
| 93 94  | 1 | 0 | 0 | 0 | 0 |
| 93100  | 2 | 0 | 0 | 0 | 0 |
| 94 95  | 1 | 0 | 0 | 0 | 0 |
| 94 96  | 1 | 0 | 0 | 0 | 0 |
| 94 97  | 1 | 0 | 0 | 0 | 0 |
| 97 98  | 1 | 0 | 0 | 0 | 0 |
| 97 99  | 1 | 0 | 0 | 0 | 0 |
| 97160  | 1 | 0 | 0 | 0 | 0 |
| 101102 | 1 | 0 | 0 | 0 | 0 |
| 101103 | 1 | 0 | 0 | 0 | 0 |
| 101149 | 1 | 0 | 0 | 0 | 0 |
| 104105 | 1 | 0 | 0 | 0 | 0 |
| 104106 | 1 | 0 | 0 | 0 | 0 |
| 104107 | 1 | 0 | 0 | 0 | 0 |
| 107108 | 1 | 0 | 0 | 0 | 0 |
| 107109 | 1 | 0 | 0 | 0 | 0 |
| 107110 | 1 | 0 | 0 | 0 | 0 |
| 110111 | 1 | 0 | 0 | 0 | 0 |
| 110118 | 2 | 0 | 0 | 0 | 0 |
| 111112 | 1 | 0 | 0 | 0 | 0 |
| 112113 | 1 | 0 | 0 | 0 | 0 |
| 112114 | 1 | 0 | 0 | 0 | 0 |
| 112115 | 1 | 0 | 0 | 0 | 0 |
| 115116 | 1 | 0 | 0 | 0 | 0 |
| 115117 | 1 | 0 | 0 | 0 | 0 |
| 115119 | 1 | 0 | 0 | 0 | 0 |
| 119120 | 1 | 0 | 0 | 0 | 0 |
| 120121 | 1 | 0 | 0 | 0 | 0 |
| 120128 | 2 | 0 | 0 | 0 | 0 |
| 121122 | 1 | 0 | 0 | 0 | 0 |
| 121123 | 2 | 0 | 0 | 0 | 0 |
| 123124 | 1 | 0 | 0 | 0 | 0 |
| 123125 | 1 | 0 | 0 | 0 | 0 |
| 125126 | 2 | 0 | 0 | 0 | 0 |
| 125130 | 1 | 0 | 0 | 0 | 0 |
| 126127 | 1 | 0 | 0 | 0 | 0 |
| 126128 | 1 | 0 | 0 | 0 | 0 |
| 128129 | 1 | 0 | 0 | 0 | 0 |
| 130131 | 1 | 0 | 0 | 0 | 0 |
| 130132 | 1 | 0 | 0 | 0 | 0 |
| 130136 | 1 | 0 | 0 | 0 | 0 |
| 131140 | 1 | 0 | 0 | 0 | 0 |
| 131147 | 2 | 0 | 0 | 0 | 0 |
| 132133 | 1 | 0 | 0 | 0 | 0 |
| 132134 | 1 | 0 | 0 | 0 | 0 |
| 132135 | 1 | 0 | 0 | 0 | 0 |
| 136137 | 1 | 0 | 0 | 0 | 0 |
| 136138 | 1 | 0 | 0 | 0 | 0 |
| 136139 | 1 | 0 | 0 | 0 | 0 |
| 140141 | 1 | 0 | 0 | 0 | 0 |
| 140142 | 2 | 0 | 0 | 0 | 0 |
| 142143 | 1 | 0 | 0 | 0 | 0 |
| 142144 | 1 | 0 | 0 | 0 | 0 |
| 144145 | 2 | 0 | 0 | 0 | 0 |
| 144149 | 1 | 0 | 0 | 0 | 0 |
| 145146 | 1 | 0 | 0 | 0 | 0 |
| 145147 | 1 | 0 | 0 | 0 | 0 |
| 147148 | 1 | 0 | 0 | 0 | 0 |
| 150151 | 1 | 0 | 0 | 0 | 0 |
| 150152 | 1 | 0 | 0 | 0 | 0 |
| 152153 | 1 | 0 | 0 | 0 | 0 |
| 152154 | 1 | 0 | 0 | 0 | 0 |
| 152155 | 1 | 0 | 0 | 0 | 0 |
| 155156 | 1 | 0 | 0 | 0 | 0 |
| 155157 | 1 | 0 | 0 | 0 | 0 |
| 155161 | 1 | 0 | 0 | 0 | 0 |
| 157158 | 1 | 0 | 0 | 0 | 0 |
| 157159 | 1 | 0 | 0 | 0 | 0 |
| 157160 | 1 | 0 | 0 | 0 | 0 |
| 160178 | 1 | 0 | 0 | 0 | 0 |
| 161162 | 1 | 0 | 0 | 0 | 0 |
| 163164 | 1 | 0 | 0 | 0 | 0 |
| 163165 | 1 | 0 | 0 | 0 | 0 |
| 163166 | 1 | 0 | 0 | 0 | 0 |



|        |   |   |   |   |   |
|--------|---|---|---|---|---|
| 163175 | 1 | 0 | 0 | 0 | 0 |
| 166167 | 1 | 0 | 0 | 0 | 0 |
| 167168 | 1 | 0 | 0 | 0 | 0 |
| 167174 | 2 | 0 | 0 | 0 | 0 |
| 168169 | 1 | 0 | 0 | 0 | 0 |
| 168170 | 1 | 0 | 0 | 0 | 0 |
| 168171 | 1 | 0 | 0 | 0 | 0 |
| 171172 | 1 | 0 | 0 | 0 | 0 |
| 171173 | 1 | 0 | 0 | 0 | 0 |
| 171234 | 1 | 0 | 0 | 0 | 0 |
| 175176 | 1 | 0 | 0 | 0 | 0 |
| 175177 | 1 | 0 | 0 | 0 | 0 |
| 175223 | 1 | 0 | 0 | 0 | 0 |
| 178179 | 1 | 0 | 0 | 0 | 0 |
| 178180 | 1 | 0 | 0 | 0 | 0 |
| 178181 | 1 | 0 | 0 | 0 | 0 |
| 181182 | 1 | 0 | 0 | 0 | 0 |
| 181183 | 1 | 0 | 0 | 0 | 0 |
| 181184 | 1 | 0 | 0 | 0 | 0 |
| 184185 | 1 | 0 | 0 | 0 | 0 |
| 184192 | 2 | 0 | 0 | 0 | 0 |
| 185186 | 1 | 0 | 0 | 0 | 0 |
| 186187 | 1 | 0 | 0 | 0 | 0 |
| 186188 | 1 | 0 | 0 | 0 | 0 |
| 186189 | 1 | 0 | 0 | 0 | 0 |
| 189190 | 1 | 0 | 0 | 0 | 0 |
| 189191 | 1 | 0 | 0 | 0 | 0 |
| 189193 | 1 | 0 | 0 | 0 | 0 |
| 193194 | 1 | 0 | 0 | 0 | 0 |
| 194195 | 1 | 0 | 0 | 0 | 0 |
| 194202 | 2 | 0 | 0 | 0 | 0 |
| 195196 | 1 | 0 | 0 | 0 | 0 |
| 195197 | 2 | 0 | 0 | 0 | 0 |
| 197198 | 1 | 0 | 0 | 0 | 0 |
| 197199 | 1 | 0 | 0 | 0 | 0 |
| 199200 | 2 | 0 | 0 | 0 | 0 |
| 199204 | 1 | 0 | 0 | 0 | 0 |
| 200201 | 1 | 0 | 0 | 0 | 0 |
| 200202 | 1 | 0 | 0 | 0 | 0 |
| 202203 | 1 | 0 | 0 | 0 | 0 |
| 204205 | 1 | 0 | 0 | 0 | 0 |
| 204206 | 1 | 0 | 0 | 0 | 0 |
| 204210 | 1 | 0 | 0 | 0 | 0 |
| 205214 | 1 | 0 | 0 | 0 | 0 |
| 205221 | 2 | 0 | 0 | 0 | 0 |
| 206207 | 1 | 0 | 0 | 0 | 0 |
| 206208 | 1 | 0 | 0 | 0 | 0 |
| 206209 | 1 | 0 | 0 | 0 | 0 |
| 210211 | 1 | 0 | 0 | 0 | 0 |
| 210212 | 1 | 0 | 0 | 0 | 0 |
| 210213 | 1 | 0 | 0 | 0 | 0 |
| 214215 | 1 | 0 | 0 | 0 | 0 |
| 214216 | 2 | 0 | 0 | 0 | 0 |
| 216217 | 1 | 0 | 0 | 0 | 0 |
| 216218 | 1 | 0 | 0 | 0 | 0 |
| 218219 | 2 | 0 | 0 | 0 | 0 |
| 218223 | 1 | 0 | 0 | 0 | 0 |
| 219220 | 1 | 0 | 0 | 0 | 0 |
| 219221 | 1 | 0 | 0 | 0 | 0 |
| 221222 | 1 | 0 | 0 | 0 | 0 |
| 224225 | 1 | 0 | 0 | 0 | 0 |
| 224226 | 1 | 0 | 0 | 0 | 0 |
| 226227 | 1 | 0 | 0 | 0 | 0 |
| 226228 | 1 | 0 | 0 | 0 | 0 |
| 226229 | 1 | 0 | 0 | 0 | 0 |
| 229230 | 1 | 0 | 0 | 0 | 0 |
| 229231 | 1 | 0 | 0 | 0 | 0 |
| 229235 | 1 | 0 | 0 | 0 | 0 |
| 231232 | 1 | 0 | 0 | 0 | 0 |
| 231233 | 1 | 0 | 0 | 0 | 0 |
| 231234 | 1 | 0 | 0 | 0 | 0 |
| 234252 | 1 | 0 | 0 | 0 | 0 |
| 235236 | 1 | 0 | 0 | 0 | 0 |
| 237238 | 1 | 0 | 0 | 0 | 0 |
| 237239 | 1 | 0 | 0 | 0 | 0 |
| 237240 | 1 | 0 | 0 | 0 | 0 |
| 237249 | 1 | 0 | 0 | 0 | 0 |
| 240241 | 1 | 0 | 0 | 0 | 0 |
| 241242 | 1 | 0 | 0 | 0 | 0 |
| 241248 | 2 | 0 | 0 | 0 | 0 |
| 242243 | 1 | 0 | 0 | 0 | 0 |

|        |   |   |   |   |   |
|--------|---|---|---|---|---|
| 242244 | 1 | 0 | 0 | 0 | 0 |
| 242245 | 1 | 0 | 0 | 0 | 0 |
| 245246 | 1 | 0 | 0 | 0 | 0 |
| 245247 | 1 | 0 | 0 | 0 | 0 |
| 245308 | 1 | 0 | 0 | 0 | 0 |
| 249250 | 1 | 0 | 0 | 0 | 0 |
| 249251 | 1 | 0 | 0 | 0 | 0 |
| 249297 | 1 | 0 | 0 | 0 | 0 |
| 252253 | 1 | 0 | 0 | 0 | 0 |
| 252254 | 1 | 0 | 0 | 0 | 0 |
| 252255 | 1 | 0 | 0 | 0 | 0 |
| 255256 | 1 | 0 | 0 | 0 | 0 |
| 255257 | 1 | 0 | 0 | 0 | 0 |
| 255258 | 1 | 0 | 0 | 0 | 0 |
| 258259 | 1 | 0 | 0 | 0 | 0 |
| 258266 | 2 | 0 | 0 | 0 | 0 |
| 259260 | 1 | 0 | 0 | 0 | 0 |
| 260261 | 1 | 0 | 0 | 0 | 0 |
| 260262 | 1 | 0 | 0 | 0 | 0 |
| 260263 | 1 | 0 | 0 | 0 | 0 |
| 263264 | 1 | 0 | 0 | 0 | 0 |
| 263265 | 1 | 0 | 0 | 0 | 0 |
| 263267 | 1 | 0 | 0 | 0 | 0 |
| 267268 | 1 | 0 | 0 | 0 | 0 |
| 268269 | 1 | 0 | 0 | 0 | 0 |
| 268276 | 2 | 0 | 0 | 0 | 0 |
| 269270 | 1 | 0 | 0 | 0 | 0 |
| 269271 | 2 | 0 | 0 | 0 | 0 |
| 271272 | 1 | 0 | 0 | 0 | 0 |
| 271273 | 1 | 0 | 0 | 0 | 0 |
| 273274 | 2 | 0 | 0 | 0 | 0 |
| 273278 | 1 | 0 | 0 | 0 | 0 |
| 274275 | 1 | 0 | 0 | 0 | 0 |
| 274276 | 1 | 0 | 0 | 0 | 0 |
| 276277 | 1 | 0 | 0 | 0 | 0 |
| 278279 | 1 | 0 | 0 | 0 | 0 |
| 278280 | 1 | 0 | 0 | 0 | 0 |
| 278284 | 1 | 0 | 0 | 0 | 0 |
| 279288 | 1 | 0 | 0 | 0 | 0 |
| 279295 | 2 | 0 | 0 | 0 | 0 |
| 280281 | 1 | 0 | 0 | 0 | 0 |
| 280282 | 1 | 0 | 0 | 0 | 0 |
| 280283 | 1 | 0 | 0 | 0 | 0 |
| 284285 | 1 | 0 | 0 | 0 | 0 |
| 284286 | 1 | 0 | 0 | 0 | 0 |
| 284287 | 1 | 0 | 0 | 0 | 0 |
| 288289 | 1 | 0 | 0 | 0 | 0 |
| 288290 | 2 | 0 | 0 | 0 | 0 |
| 290291 | 1 | 0 | 0 | 0 | 0 |
| 290292 | 1 | 0 | 0 | 0 | 0 |
| 292293 | 2 | 0 | 0 | 0 | 0 |
| 292297 | 1 | 0 | 0 | 0 | 0 |
| 293294 | 1 | 0 | 0 | 0 | 0 |
| 293295 | 1 | 0 | 0 | 0 | 0 |
| 295296 | 1 | 0 | 0 | 0 | 0 |
| 298299 | 1 | 0 | 0 | 0 | 0 |
| 298300 | 1 | 0 | 0 | 0 | 0 |
| 300301 | 1 | 0 | 0 | 0 | 0 |
| 300302 | 1 | 0 | 0 | 0 | 0 |
| 300303 | 1 | 0 | 0 | 0 | 0 |
| 303304 | 1 | 0 | 0 | 0 | 0 |
| 303305 | 1 | 0 | 0 | 0 | 0 |
| 303309 | 1 | 0 | 0 | 0 | 0 |
| 305306 | 1 | 0 | 0 | 0 | 0 |
| 305307 | 1 | 0 | 0 | 0 | 0 |
| 305308 | 1 | 0 | 0 | 0 | 0 |
| 308327 | 1 | 0 | 0 | 0 | 0 |
| 309310 | 1 | 0 | 0 | 0 | 0 |
| 311312 | 1 | 0 | 0 | 0 | 0 |
| 311313 | 1 | 0 | 0 | 0 | 0 |
| 311314 | 1 | 0 | 0 | 0 | 0 |
| 311324 | 1 | 0 | 0 | 0 | 0 |
| 314315 | 1 | 0 | 0 | 0 | 0 |
| 315316 | 1 | 0 | 0 | 0 | 0 |
| 315323 | 2 | 0 | 0 | 0 | 0 |
| 316317 | 1 | 0 | 0 | 0 | 0 |
| 316318 | 1 | 0 | 0 | 0 | 0 |
| 316319 | 1 | 0 | 0 | 0 | 0 |
| 319320 | 1 | 0 | 0 | 0 | 0 |
| 319321 | 1 | 0 | 0 | 0 | 0 |
| 319322 | 1 | 0 | 0 | 0 | 0 |

```

324325 1 0 0 0 0
324326 1 0 0 0 0
324372 1 0 0 0 0
327328 1 0 0 0 0
327329 1 0 0 0 0
327330 1 0 0 0 0
330331 1 0 0 0 0
330332 1 0 0 0 0
330333 1 0 0 0 0
333334 1 0 0 0 0
333341 2 0 0 0 0
334335 1 0 0 0 0
335336 1 0 0 0 0
335337 1 0 0 0 0
335338 1 0 0 0 0
338339 1 0 0 0 0
338340 1 0 0 0 0
338342 1 0 0 0 0
342343 1 0 0 0 0
343344 1 0 0 0 0
343351 2 0 0 0 0
344345 1 0 0 0 0
344346 2 0 0 0 0
346347 1 0 0 0 0
346348 1 0 0 0 0
348349 2 0 0 0 0
348353 1 0 0 0 0
349350 1 0 0 0 0
349351 1 0 0 0 0
351352 1 0 0 0 0
353354 1 0 0 0 0
353355 1 0 0 0 0
353359 1 0 0 0 0
354363 1 0 0 0 0
354370 2 0 0 0 0
355356 1 0 0 0 0
355357 1 0 0 0 0
355358 1 0 0 0 0
359360 1 0 0 0 0
359361 1 0 0 0 0
359362 1 0 0 0 0
363364 1 0 0 0 0
363365 2 0 0 0 0
365366 1 0 0 0 0
365367 1 0 0 0 0
367368 2 0 0 0 0
367372 1 0 0 0 0
368369 1 0 0 0 0
368370 1 0 0 0 0
370371 1 0 0 0 0

```

```

M END
> <NAME>
D24_1

```

```

$$$$
D25_1
MOE2012 3D

```

```

372381 0 0 1 0 0 0 0 0999 V2000
20.2980 12.1390 23.0080 O 0 0 0 0 0 0 0 0 0 0 0 0 0 0 0
19.7070 11.7670 23.6860 H 0 0 0 0 0 0 0 0 0 0 0 0 0 0 0
21.2760 11.1330 22.7210 C 0 0 0 0 0 0 0 0 0 0 0 0 0 0 0
21.8350 10.9280 23.6410 H 0 0 0 0 0 0 0 0 0 0 0 0 0 0 0
20.7490 10.2240 22.4140 H 0 0 0 0 0 0 0 0 0 0 0 0 0 0 0
22.2040 11.6420 21.6000 C 0 0 0 0 0 0 0 0 0 0 0 0 0 0 0
21.5750 11.7540 20.7060 H 0 0 0 0 0 0 0 0 0 0 0 0 0 0 0
23.3260 10.6320 21.3270 C 0 0 0 0 0 0 0 0 0 0 0 0 0 0 0
23.9840 10.9770 20.5240 H 0 0 0 0 0 0 0 0 0 0 0 0 0 0 0
23.9320 10.4650 22.2240 H 0 0 0 0 0 0 0 0 0 0 0 0 0 0 0
22.7700 9.3850 20.9240 O 0 0 0 0 0 0 0 0 0 0 0 0 0 0 0
23.5110 8.7690 20.7850 H 0 0 0 0 0 0 0 0 0 0 0 0 0 0 0
22.7320 12.9640 22.0040 N 0 0 3 0 0 0 0 0 0 0 0 0 0 0 0
21.9550 13.4400 22.4800 H 0 0 0 0 0 0 0 0 0 0 0 0 0 0 0
31.5390 18.7340 7.8650 C 0 0 0 0 0 0 0 0 0 0 0 0 0 0 0
31.7980 19.2000 8.8220 H 0 0 0 0 0 0 0 0 0 0 0 0 0 0 0
30.5520 19.1320 7.6000 H 0 0 0 0 0 0 0 0 0 0 0 0 0 0 0
32.5370 19.1370 6.9140 O 0 0 0 0 0 0 0 0 0 0 0 0 0 0 0
32.1500 19.1200 5.6090 C 0 0 0 0 0 0 0 0 0 0 0 0 0 0 0
33.2820 19.5700 4.7280 C 0 0 0 0 0 0 0 0 0 0 0 0 0 0 0
33.9860 20.1640 5.3220 H 0 0 0 0 0 0 0 0 0 0 0 0 0 0 0
33.7960 18.6700 4.3790 H 0 0 0 0 0 0 0 0 0 0 0 0 0 0 0

```









|         |          |          |   |   |   |   |   |   |   |   |   |   |   |   |   |   |
|---------|----------|----------|---|---|---|---|---|---|---|---|---|---|---|---|---|---|
| 69.8410 | -12.3090 | -31.1620 | H | 0 | 0 | 0 | 0 | 0 | 0 | 0 | 0 | 0 | 0 | 0 | 0 | 0 |
| 71.9410 | -12.4620 | -31.6950 | C | 0 | 0 | 0 | 0 | 0 | 0 | 0 | 0 | 0 | 0 | 0 | 0 | 0 |
| 73.1910 | -11.8470 | -31.5160 | C | 0 | 0 | 0 | 0 | 0 | 0 | 0 | 0 | 0 | 0 | 0 | 0 | 0 |
| 74.0880 | -12.2440 | -31.9810 | H | 0 | 0 | 0 | 0 | 0 | 0 | 0 | 0 | 0 | 0 | 0 | 0 | 0 |
| 73.3300 | -10.6910 | -30.7330 | C | 0 | 0 | 0 | 0 | 0 | 0 | 0 | 0 | 0 | 0 | 0 | 0 | 0 |
| 74.3230 | -10.2650 | -30.6330 | H | 0 | 0 | 0 | 0 | 0 | 0 | 0 | 0 | 0 | 0 | 0 | 0 | 0 |
| 71.7440 | -13.7300 | -32.5590 | C | 0 | 0 | 0 | 0 | 0 | 0 | 0 | 0 | 0 | 0 | 0 | 0 | 0 |
| 71.0730 | -14.8620 | -31.7440 | C | 0 | 0 | 0 | 0 | 0 | 0 | 0 | 0 | 0 | 0 | 0 | 0 | 0 |
| 70.9270 | -13.2890 | -33.8030 | C | 0 | 0 | 0 | 0 | 0 | 0 | 0 | 0 | 0 | 0 | 0 | 0 | 0 |
| 69.9180 | -12.9490 | -33.5410 | H | 0 | 0 | 0 | 0 | 0 | 0 | 0 | 0 | 0 | 0 | 0 | 0 | 0 |
| 70.8200 | -14.1060 | -34.5280 | H | 0 | 0 | 0 | 0 | 0 | 0 | 0 | 0 | 0 | 0 | 0 | 0 | 0 |
| 71.4210 | -12.4600 | -34.3260 | H | 0 | 0 | 0 | 0 | 0 | 0 | 0 | 0 | 0 | 0 | 0 | 0 | 0 |
| 73.0690 | -14.3200 | -33.1120 | C | 0 | 0 | 0 | 0 | 0 | 0 | 0 | 0 | 0 | 0 | 0 | 0 | 0 |
| 73.5820 | -13.6130 | -33.7740 | H | 0 | 0 | 0 | 0 | 0 | 0 | 0 | 0 | 0 | 0 | 0 | 0 | 0 |
| 73.7690 | -14.5920 | -32.3130 | H | 0 | 0 | 0 | 0 | 0 | 0 | 0 | 0 | 0 | 0 | 0 | 0 | 0 |
| 72.8820 | -15.2300 | -33.6960 | H | 0 | 0 | 0 | 0 | 0 | 0 | 0 | 0 | 0 | 0 | 0 | 0 | 0 |
| 71.6330 | -15.2660 | -30.5170 | C | 0 | 0 | 0 | 0 | 0 | 0 | 0 | 0 | 0 | 0 | 0 | 0 | 0 |
| 72.5210 | -14.7720 | -30.1280 | H | 0 | 0 | 0 | 0 | 0 | 0 | 0 | 0 | 0 | 0 | 0 | 0 | 0 |
| 71.0690 | -16.3040 | -29.7690 | C | 0 | 0 | 0 | 0 | 0 | 0 | 0 | 0 | 0 | 0 | 0 | 0 | 0 |
| 71.5250 | -16.5920 | -28.8250 | H | 0 | 0 | 0 | 0 | 0 | 0 | 0 | 0 | 0 | 0 | 0 | 0 | 0 |
| 69.9380 | -16.9800 | -30.2260 | C | 0 | 0 | 0 | 0 | 0 | 0 | 0 | 0 | 0 | 0 | 0 | 0 | 0 |
| 69.3630 | -16.5880 | -31.4320 | C | 0 | 0 | 0 | 0 | 0 | 0 | 0 | 0 | 0 | 0 | 0 | 0 | 0 |
| 68.4710 | -17.0650 | -31.8240 | H | 0 | 0 | 0 | 0 | 0 | 0 | 0 | 0 | 0 | 0 | 0 | 0 | 0 |
| 69.9260 | -15.5440 | -32.1830 | C | 0 | 0 | 0 | 0 | 0 | 0 | 0 | 0 | 0 | 0 | 0 | 0 | 0 |
| 69.4400 | -15.2880 | -33.1210 | H | 0 | 0 | 0 | 0 | 0 | 0 | 0 | 0 | 0 | 0 | 0 | 0 | 0 |
| 69.4970 | -17.9750 | -29.4010 | O | 0 | 0 | 0 | 0 | 0 | 0 | 0 | 0 | 0 | 0 | 0 | 0 | 0 |
| 1       | 2        | 1        | 0 | 0 | 0 | 0 |   |   |   |   |   |   |   |   |   |   |
| 1       | 3        | 1        | 0 | 0 | 0 | 0 |   |   |   |   |   |   |   |   |   |   |
| 3       | 4        | 1        | 0 | 0 | 0 | 0 |   |   |   |   |   |   |   |   |   |   |
| 3       | 5        | 1        | 0 | 0 | 0 | 0 |   |   |   |   |   |   |   |   |   |   |
| 3       | 6        | 1        | 0 | 0 | 0 | 0 |   |   |   |   |   |   |   |   |   |   |
| 6       | 7        | 1        | 0 | 0 | 0 | 0 |   |   |   |   |   |   |   |   |   |   |
| 6       | 8        | 1        | 0 | 0 | 0 | 0 |   |   |   |   |   |   |   |   |   |   |
| 6       | 13       | 1        | 0 | 0 | 0 | 0 |   |   |   |   |   |   |   |   |   |   |
| 8       | 9        | 1        | 0 | 0 | 0 | 0 |   |   |   |   |   |   |   |   |   |   |
| 8       | 10       | 1        | 0 | 0 | 0 | 0 |   |   |   |   |   |   |   |   |   |   |
| 8       | 11       | 1        | 0 | 0 | 0 | 0 |   |   |   |   |   |   |   |   |   |   |
| 11      | 12       | 1        | 0 | 0 | 0 | 0 |   |   |   |   |   |   |   |   |   |   |
| 13      | 14       | 1        | 0 | 0 | 0 | 0 |   |   |   |   |   |   |   |   |   |   |
| 13      | 30       | 1        | 0 | 0 | 0 | 0 |   |   |   |   |   |   |   |   |   |   |
| 15      | 16       | 1        | 0 | 0 | 0 | 0 |   |   |   |   |   |   |   |   |   |   |
| 15      | 17       | 1        | 0 | 0 | 0 | 0 |   |   |   |   |   |   |   |   |   |   |
| 15      | 18       | 1        | 0 | 0 | 0 | 0 |   |   |   |   |   |   |   |   |   |   |
| 15      | 27       | 1        | 0 | 0 | 0 | 0 |   |   |   |   |   |   |   |   |   |   |
| 18      | 19       | 1        | 0 | 0 | 0 | 0 |   |   |   |   |   |   |   |   |   |   |
| 19      | 20       | 1        | 0 | 0 | 0 | 0 |   |   |   |   |   |   |   |   |   |   |
| 19      | 26       | 2        | 0 | 0 | 0 | 0 |   |   |   |   |   |   |   |   |   |   |
| 20      | 21       | 1        | 0 | 0 | 0 | 0 |   |   |   |   |   |   |   |   |   |   |
| 20      | 22       | 1        | 0 | 0 | 0 | 0 |   |   |   |   |   |   |   |   |   |   |
| 20      | 23       | 1        | 0 | 0 | 0 | 0 |   |   |   |   |   |   |   |   |   |   |
| 23      | 24       | 1        | 0 | 0 | 0 | 0 |   |   |   |   |   |   |   |   |   |   |
| 23      | 25       | 1        | 0 | 0 | 0 | 0 |   |   |   |   |   |   |   |   |   |   |
| 23      | 88       | 1        | 0 | 0 | 0 | 0 |   |   |   |   |   |   |   |   |   |   |
| 27      | 28       | 1        | 0 | 0 | 0 | 0 |   |   |   |   |   |   |   |   |   |   |
| 27      | 29       | 1        | 0 | 0 | 0 | 0 |   |   |   |   |   |   |   |   |   |   |
| 27      | 75       | 1        | 0 | 0 | 0 | 0 |   |   |   |   |   |   |   |   |   |   |
| 30      | 31       | 1        | 0 | 0 | 0 | 0 |   |   |   |   |   |   |   |   |   |   |
| 30      | 32       | 1        | 0 | 0 | 0 | 0 |   |   |   |   |   |   |   |   |   |   |
| 30      | 33       | 1        | 0 | 0 | 0 | 0 |   |   |   |   |   |   |   |   |   |   |
| 33      | 34       | 1        | 0 | 0 | 0 | 0 |   |   |   |   |   |   |   |   |   |   |
| 33      | 35       | 1        | 0 | 0 | 0 | 0 |   |   |   |   |   |   |   |   |   |   |
| 33      | 36       | 1        | 0 | 0 | 0 | 0 |   |   |   |   |   |   |   |   |   |   |
| 36      | 37       | 1        | 0 | 0 | 0 | 0 |   |   |   |   |   |   |   |   |   |   |
| 36      | 44       | 2        | 0 | 0 | 0 | 0 |   |   |   |   |   |   |   |   |   |   |
| 37      | 38       | 1        | 0 | 0 | 0 | 0 |   |   |   |   |   |   |   |   |   |   |
| 38      | 39       | 1        | 0 | 0 | 0 | 0 |   |   |   |   |   |   |   |   |   |   |
| 38      | 40       | 1        | 0 | 0 | 0 | 0 |   |   |   |   |   |   |   |   |   |   |
| 38      | 41       | 1        | 0 | 0 | 0 | 0 |   |   |   |   |   |   |   |   |   |   |
| 41      | 42       | 1        | 0 | 0 | 0 | 0 |   |   |   |   |   |   |   |   |   |   |
| 41      | 43       | 1        | 0 | 0 | 0 | 0 |   |   |   |   |   |   |   |   |   |   |
| 41      | 45       | 1        | 0 | 0 | 0 | 0 |   |   |   |   |   |   |   |   |   |   |
| 45      | 46       | 1        | 0 | 0 | 0 | 0 |   |   |   |   |   |   |   |   |   |   |
| 46      | 47       | 1        | 0 | 0 | 0 | 0 |   |   |   |   |   |   |   |   |   |   |
| 46      | 54       | 2        | 0 | 0 | 0 | 0 |   |   |   |   |   |   |   |   |   |   |
| 47      | 48       | 1        | 0 | 0 | 0 | 0 |   |   |   |   |   |   |   |   |   |   |
| 47      | 49       | 2        | 0 | 0 | 0 | 0 |   |   |   |   |   |   |   |   |   |   |
| 49      | 50       | 1        | 0 | 0 | 0 | 0 |   |   |   |   |   |   |   |   |   |   |
| 49      | 51       | 1        | 0 | 0 | 0 | 0 |   |   |   |   |   |   |   |   |   |   |
| 51      | 52       | 2        | 0 | 0 | 0 | 0 |   |   |   |   |   |   |   |   |   |   |
| 51      | 56       | 1        | 0 | 0 | 0 | 0 |   |   |   |   |   |   |   |   |   |   |
| 52      | 53       | 1        | 0 | 0 | 0 | 0 |   |   |   |   |   |   |   |   |   |   |



|     |     |   |   |   |   |   |
|-----|-----|---|---|---|---|---|
| 52  | 54  | 1 | 0 | 0 | 0 | 0 |
| 54  | 55  | 1 | 0 | 0 | 0 | 0 |
| 56  | 57  | 1 | 0 | 0 | 0 | 0 |
| 56  | 58  | 1 | 0 | 0 | 0 | 0 |
| 56  | 62  | 1 | 0 | 0 | 0 | 0 |
| 57  | 66  | 1 | 0 | 0 | 0 | 0 |
| 57  | 73  | 2 | 0 | 0 | 0 | 0 |
| 58  | 59  | 1 | 0 | 0 | 0 | 0 |
| 58  | 60  | 1 | 0 | 0 | 0 | 0 |
| 58  | 61  | 1 | 0 | 0 | 0 | 0 |
| 62  | 63  | 1 | 0 | 0 | 0 | 0 |
| 62  | 64  | 1 | 0 | 0 | 0 | 0 |
| 62  | 65  | 1 | 0 | 0 | 0 | 0 |
| 66  | 67  | 1 | 0 | 0 | 0 | 0 |
| 66  | 68  | 2 | 0 | 0 | 0 | 0 |
| 68  | 69  | 1 | 0 | 0 | 0 | 0 |
| 68  | 70  | 1 | 0 | 0 | 0 | 0 |
| 70  | 71  | 2 | 0 | 0 | 0 | 0 |
| 70  | 75  | 1 | 0 | 0 | 0 | 0 |
| 71  | 72  | 1 | 0 | 0 | 0 | 0 |
| 71  | 73  | 1 | 0 | 0 | 0 | 0 |
| 73  | 74  | 1 | 0 | 0 | 0 | 0 |
| 76  | 77  | 1 | 0 | 0 | 0 | 0 |
| 76  | 78  | 1 | 0 | 0 | 0 | 0 |
| 78  | 79  | 1 | 0 | 0 | 0 | 0 |
| 78  | 80  | 1 | 0 | 0 | 0 | 0 |
| 78  | 81  | 1 | 0 | 0 | 0 | 0 |
| 81  | 82  | 1 | 0 | 0 | 0 | 0 |
| 81  | 83  | 1 | 0 | 0 | 0 | 0 |
| 81  | 88  | 1 | 0 | 0 | 0 | 0 |
| 83  | 84  | 1 | 0 | 0 | 0 | 0 |
| 83  | 85  | 1 | 0 | 0 | 0 | 0 |
| 83  | 86  | 1 | 0 | 0 | 0 | 0 |
| 86  | 87  | 1 | 0 | 0 | 0 | 0 |
| 88  | 104 | 1 | 0 | 0 | 0 | 0 |
| 89  | 90  | 1 | 0 | 0 | 0 | 0 |
| 89  | 91  | 1 | 0 | 0 | 0 | 0 |
| 89  | 92  | 1 | 0 | 0 | 0 | 0 |
| 89  | 101 | 1 | 0 | 0 | 0 | 0 |
| 92  | 93  | 1 | 0 | 0 | 0 | 0 |
| 93  | 94  | 1 | 0 | 0 | 0 | 0 |
| 93  | 100 | 2 | 0 | 0 | 0 | 0 |
| 94  | 95  | 1 | 0 | 0 | 0 | 0 |
| 94  | 96  | 1 | 0 | 0 | 0 | 0 |
| 94  | 97  | 1 | 0 | 0 | 0 | 0 |
| 97  | 98  | 1 | 0 | 0 | 0 | 0 |
| 97  | 99  | 1 | 0 | 0 | 0 | 0 |
| 97  | 162 | 1 | 0 | 0 | 0 | 0 |
| 101 | 102 | 1 | 0 | 0 | 0 | 0 |
| 101 | 103 | 1 | 0 | 0 | 0 | 0 |
| 101 | 149 | 1 | 0 | 0 | 0 | 0 |
| 104 | 105 | 1 | 0 | 0 | 0 | 0 |
| 104 | 106 | 1 | 0 | 0 | 0 | 0 |
| 104 | 107 | 1 | 0 | 0 | 0 | 0 |
| 107 | 108 | 1 | 0 | 0 | 0 | 0 |
| 107 | 109 | 1 | 0 | 0 | 0 | 0 |
| 107 | 110 | 1 | 0 | 0 | 0 | 0 |
| 110 | 111 | 1 | 0 | 0 | 0 | 0 |
| 110 | 118 | 2 | 0 | 0 | 0 | 0 |
| 111 | 112 | 1 | 0 | 0 | 0 | 0 |
| 112 | 113 | 1 | 0 | 0 | 0 | 0 |
| 112 | 114 | 1 | 0 | 0 | 0 | 0 |
| 112 | 115 | 1 | 0 | 0 | 0 | 0 |
| 115 | 116 | 1 | 0 | 0 | 0 | 0 |
| 115 | 117 | 1 | 0 | 0 | 0 | 0 |
| 115 | 119 | 1 | 0 | 0 | 0 | 0 |
| 119 | 120 | 1 | 0 | 0 | 0 | 0 |
| 120 | 121 | 1 | 0 | 0 | 0 | 0 |
| 120 | 128 | 2 | 0 | 0 | 0 | 0 |
| 121 | 122 | 1 | 0 | 0 | 0 | 0 |
| 121 | 123 | 2 | 0 | 0 | 0 | 0 |
| 123 | 124 | 1 | 0 | 0 | 0 | 0 |
| 123 | 125 | 1 | 0 | 0 | 0 | 0 |
| 125 | 126 | 2 | 0 | 0 | 0 | 0 |
| 125 | 130 | 1 | 0 | 0 | 0 | 0 |
| 126 | 127 | 1 | 0 | 0 | 0 | 0 |
| 126 | 128 | 1 | 0 | 0 | 0 | 0 |
| 128 | 129 | 1 | 0 | 0 | 0 | 0 |
| 130 | 131 | 1 | 0 | 0 | 0 | 0 |
| 130 | 132 | 1 | 0 | 0 | 0 | 0 |
| 130 | 136 | 1 | 0 | 0 | 0 | 0 |

|        |   |   |   |   |   |
|--------|---|---|---|---|---|
| 131140 | 1 | 0 | 0 | 0 | 0 |
| 131147 | 2 | 0 | 0 | 0 | 0 |
| 132133 | 1 | 0 | 0 | 0 | 0 |
| 132134 | 1 | 0 | 0 | 0 | 0 |
| 132135 | 1 | 0 | 0 | 0 | 0 |
| 136137 | 1 | 0 | 0 | 0 | 0 |
| 136138 | 1 | 0 | 0 | 0 | 0 |
| 136139 | 1 | 0 | 0 | 0 | 0 |
| 140141 | 1 | 0 | 0 | 0 | 0 |
| 140142 | 2 | 0 | 0 | 0 | 0 |
| 142143 | 1 | 0 | 0 | 0 | 0 |
| 142144 | 1 | 0 | 0 | 0 | 0 |
| 144145 | 2 | 0 | 0 | 0 | 0 |
| 144149 | 1 | 0 | 0 | 0 | 0 |
| 145146 | 1 | 0 | 0 | 0 | 0 |
| 145147 | 1 | 0 | 0 | 0 | 0 |
| 147148 | 1 | 0 | 0 | 0 | 0 |
| 150151 | 1 | 0 | 0 | 0 | 0 |
| 150152 | 1 | 0 | 0 | 0 | 0 |
| 152153 | 1 | 0 | 0 | 0 | 0 |
| 152154 | 1 | 0 | 0 | 0 | 0 |
| 152155 | 1 | 0 | 0 | 0 | 0 |
| 155156 | 1 | 0 | 0 | 0 | 0 |
| 155157 | 1 | 0 | 0 | 0 | 0 |
| 155162 | 1 | 0 | 0 | 0 | 0 |
| 157158 | 1 | 0 | 0 | 0 | 0 |
| 157159 | 1 | 0 | 0 | 0 | 0 |
| 157160 | 1 | 0 | 0 | 0 | 0 |
| 160161 | 1 | 0 | 0 | 0 | 0 |
| 162178 | 1 | 0 | 0 | 0 | 0 |
| 163164 | 1 | 0 | 0 | 0 | 0 |
| 163165 | 1 | 0 | 0 | 0 | 0 |
| 163166 | 1 | 0 | 0 | 0 | 0 |
| 163175 | 1 | 0 | 0 | 0 | 0 |
| 166167 | 1 | 0 | 0 | 0 | 0 |
| 167168 | 1 | 0 | 0 | 0 | 0 |
| 167174 | 2 | 0 | 0 | 0 | 0 |
| 168169 | 1 | 0 | 0 | 0 | 0 |
| 168170 | 1 | 0 | 0 | 0 | 0 |
| 168171 | 1 | 0 | 0 | 0 | 0 |
| 171172 | 1 | 0 | 0 | 0 | 0 |
| 171173 | 1 | 0 | 0 | 0 | 0 |
| 171236 | 1 | 0 | 0 | 0 | 0 |
| 175176 | 1 | 0 | 0 | 0 | 0 |
| 175177 | 1 | 0 | 0 | 0 | 0 |
| 175223 | 1 | 0 | 0 | 0 | 0 |
| 178179 | 1 | 0 | 0 | 0 | 0 |
| 178180 | 1 | 0 | 0 | 0 | 0 |
| 178181 | 1 | 0 | 0 | 0 | 0 |
| 181182 | 1 | 0 | 0 | 0 | 0 |
| 181183 | 1 | 0 | 0 | 0 | 0 |
| 181184 | 1 | 0 | 0 | 0 | 0 |
| 184185 | 1 | 0 | 0 | 0 | 0 |
| 184192 | 2 | 0 | 0 | 0 | 0 |
| 185186 | 1 | 0 | 0 | 0 | 0 |
| 186187 | 1 | 0 | 0 | 0 | 0 |
| 186188 | 1 | 0 | 0 | 0 | 0 |
| 186189 | 1 | 0 | 0 | 0 | 0 |
| 189190 | 1 | 0 | 0 | 0 | 0 |
| 189191 | 1 | 0 | 0 | 0 | 0 |
| 189193 | 1 | 0 | 0 | 0 | 0 |
| 193194 | 1 | 0 | 0 | 0 | 0 |
| 194195 | 1 | 0 | 0 | 0 | 0 |
| 194202 | 2 | 0 | 0 | 0 | 0 |
| 195196 | 1 | 0 | 0 | 0 | 0 |
| 195197 | 2 | 0 | 0 | 0 | 0 |
| 197198 | 1 | 0 | 0 | 0 | 0 |
| 197199 | 1 | 0 | 0 | 0 | 0 |
| 199200 | 2 | 0 | 0 | 0 | 0 |
| 199204 | 1 | 0 | 0 | 0 | 0 |
| 200201 | 1 | 0 | 0 | 0 | 0 |
| 200202 | 1 | 0 | 0 | 0 | 0 |
| 202203 | 1 | 0 | 0 | 0 | 0 |
| 204205 | 1 | 0 | 0 | 0 | 0 |
| 204206 | 1 | 0 | 0 | 0 | 0 |
| 204210 | 1 | 0 | 0 | 0 | 0 |
| 205214 | 1 | 0 | 0 | 0 | 0 |
| 205221 | 2 | 0 | 0 | 0 | 0 |
| 206207 | 1 | 0 | 0 | 0 | 0 |
| 206208 | 1 | 0 | 0 | 0 | 0 |
| 206209 | 1 | 0 | 0 | 0 | 0 |

|        |   |   |   |   |   |
|--------|---|---|---|---|---|
| 210211 | 1 | 0 | 0 | 0 | 0 |
| 210212 | 1 | 0 | 0 | 0 | 0 |
| 210213 | 1 | 0 | 0 | 0 | 0 |
| 214215 | 1 | 0 | 0 | 0 | 0 |
| 214216 | 2 | 0 | 0 | 0 | 0 |
| 216217 | 1 | 0 | 0 | 0 | 0 |
| 216218 | 1 | 0 | 0 | 0 | 0 |
| 218219 | 2 | 0 | 0 | 0 | 0 |
| 218223 | 1 | 0 | 0 | 0 | 0 |
| 219220 | 1 | 0 | 0 | 0 | 0 |
| 219221 | 1 | 0 | 0 | 0 | 0 |
| 221222 | 1 | 0 | 0 | 0 | 0 |
| 224225 | 1 | 0 | 0 | 0 | 0 |
| 224226 | 1 | 0 | 0 | 0 | 0 |
| 226227 | 1 | 0 | 0 | 0 | 0 |
| 226228 | 1 | 0 | 0 | 0 | 0 |
| 226229 | 1 | 0 | 0 | 0 | 0 |
| 229230 | 1 | 0 | 0 | 0 | 0 |
| 229231 | 1 | 0 | 0 | 0 | 0 |
| 229236 | 1 | 0 | 0 | 0 | 0 |
| 231232 | 1 | 0 | 0 | 0 | 0 |
| 231233 | 1 | 0 | 0 | 0 | 0 |
| 231234 | 1 | 0 | 0 | 0 | 0 |
| 234235 | 1 | 0 | 0 | 0 | 0 |
| 236252 | 1 | 0 | 0 | 0 | 0 |
| 237238 | 1 | 0 | 0 | 0 | 0 |
| 237239 | 1 | 0 | 0 | 0 | 0 |
| 237240 | 1 | 0 | 0 | 0 | 0 |
| 237249 | 1 | 0 | 0 | 0 | 0 |
| 240241 | 1 | 0 | 0 | 0 | 0 |
| 241242 | 1 | 0 | 0 | 0 | 0 |
| 241248 | 2 | 0 | 0 | 0 | 0 |
| 242243 | 1 | 0 | 0 | 0 | 0 |
| 242244 | 1 | 0 | 0 | 0 | 0 |
| 242245 | 1 | 0 | 0 | 0 | 0 |
| 245246 | 1 | 0 | 0 | 0 | 0 |
| 245247 | 1 | 0 | 0 | 0 | 0 |
| 245310 | 1 | 0 | 0 | 0 | 0 |
| 249250 | 1 | 0 | 0 | 0 | 0 |
| 249251 | 1 | 0 | 0 | 0 | 0 |
| 249297 | 1 | 0 | 0 | 0 | 0 |
| 252253 | 1 | 0 | 0 | 0 | 0 |
| 252254 | 1 | 0 | 0 | 0 | 0 |
| 252255 | 1 | 0 | 0 | 0 | 0 |
| 255256 | 1 | 0 | 0 | 0 | 0 |
| 255257 | 1 | 0 | 0 | 0 | 0 |
| 255258 | 1 | 0 | 0 | 0 | 0 |
| 258259 | 1 | 0 | 0 | 0 | 0 |
| 258266 | 2 | 0 | 0 | 0 | 0 |
| 259260 | 1 | 0 | 0 | 0 | 0 |
| 260261 | 1 | 0 | 0 | 0 | 0 |
| 260262 | 1 | 0 | 0 | 0 | 0 |
| 260263 | 1 | 0 | 0 | 0 | 0 |
| 263264 | 1 | 0 | 0 | 0 | 0 |
| 263265 | 1 | 0 | 0 | 0 | 0 |
| 263267 | 1 | 0 | 0 | 0 | 0 |
| 267268 | 1 | 0 | 0 | 0 | 0 |
| 268269 | 1 | 0 | 0 | 0 | 0 |
| 268276 | 2 | 0 | 0 | 0 | 0 |
| 269270 | 1 | 0 | 0 | 0 | 0 |
| 269271 | 2 | 0 | 0 | 0 | 0 |
| 271272 | 1 | 0 | 0 | 0 | 0 |
| 271273 | 1 | 0 | 0 | 0 | 0 |
| 273274 | 2 | 0 | 0 | 0 | 0 |
| 273278 | 1 | 0 | 0 | 0 | 0 |
| 274275 | 1 | 0 | 0 | 0 | 0 |
| 274276 | 1 | 0 | 0 | 0 | 0 |
| 276277 | 1 | 0 | 0 | 0 | 0 |
| 278279 | 1 | 0 | 0 | 0 | 0 |
| 278280 | 1 | 0 | 0 | 0 | 0 |
| 278284 | 1 | 0 | 0 | 0 | 0 |
| 279288 | 1 | 0 | 0 | 0 | 0 |
| 279295 | 2 | 0 | 0 | 0 | 0 |
| 280281 | 1 | 0 | 0 | 0 | 0 |
| 280282 | 1 | 0 | 0 | 0 | 0 |
| 280283 | 1 | 0 | 0 | 0 | 0 |
| 284285 | 1 | 0 | 0 | 0 | 0 |
| 284286 | 1 | 0 | 0 | 0 | 0 |
| 284287 | 1 | 0 | 0 | 0 | 0 |
| 288289 | 1 | 0 | 0 | 0 | 0 |
| 288290 | 2 | 0 | 0 | 0 | 0 |

|        |   |   |   |   |   |
|--------|---|---|---|---|---|
| 290291 | 1 | 0 | 0 | 0 | 0 |
| 290292 | 1 | 0 | 0 | 0 | 0 |
| 292293 | 2 | 0 | 0 | 0 | 0 |
| 292297 | 1 | 0 | 0 | 0 | 0 |
| 293294 | 1 | 0 | 0 | 0 | 0 |
| 293295 | 1 | 0 | 0 | 0 | 0 |
| 295296 | 1 | 0 | 0 | 0 | 0 |
| 298299 | 1 | 0 | 0 | 0 | 0 |
| 298300 | 1 | 0 | 0 | 0 | 0 |
| 300301 | 1 | 0 | 0 | 0 | 0 |
| 300302 | 1 | 0 | 0 | 0 | 0 |
| 300303 | 1 | 0 | 0 | 0 | 0 |
| 303304 | 1 | 0 | 0 | 0 | 0 |
| 303305 | 1 | 0 | 0 | 0 | 0 |
| 303310 | 1 | 0 | 0 | 0 | 0 |
| 305306 | 1 | 0 | 0 | 0 | 0 |
| 305307 | 1 | 0 | 0 | 0 | 0 |
| 305308 | 1 | 0 | 0 | 0 | 0 |
| 308309 | 1 | 0 | 0 | 0 | 0 |
| 310327 | 1 | 0 | 0 | 0 | 0 |
| 311312 | 1 | 0 | 0 | 0 | 0 |
| 311313 | 1 | 0 | 0 | 0 | 0 |
| 311314 | 1 | 0 | 0 | 0 | 0 |
| 311324 | 1 | 0 | 0 | 0 | 0 |
| 314315 | 1 | 0 | 0 | 0 | 0 |
| 315316 | 1 | 0 | 0 | 0 | 0 |
| 315323 | 2 | 0 | 0 | 0 | 0 |
| 316317 | 1 | 0 | 0 | 0 | 0 |
| 316318 | 1 | 0 | 0 | 0 | 0 |
| 316319 | 1 | 0 | 0 | 0 | 0 |
| 319320 | 1 | 0 | 0 | 0 | 0 |
| 319321 | 1 | 0 | 0 | 0 | 0 |
| 319322 | 1 | 0 | 0 | 0 | 0 |
| 324325 | 1 | 0 | 0 | 0 | 0 |
| 324326 | 1 | 0 | 0 | 0 | 0 |
| 324372 | 1 | 0 | 0 | 0 | 0 |
| 327328 | 1 | 0 | 0 | 0 | 0 |
| 327329 | 1 | 0 | 0 | 0 | 0 |
| 327330 | 1 | 0 | 0 | 0 | 0 |
| 330331 | 1 | 0 | 0 | 0 | 0 |
| 330332 | 1 | 0 | 0 | 0 | 0 |
| 330333 | 1 | 0 | 0 | 0 | 0 |
| 333334 | 1 | 0 | 0 | 0 | 0 |
| 333341 | 2 | 0 | 0 | 0 | 0 |
| 334335 | 1 | 0 | 0 | 0 | 0 |
| 335336 | 1 | 0 | 0 | 0 | 0 |
| 335337 | 1 | 0 | 0 | 0 | 0 |
| 335338 | 1 | 0 | 0 | 0 | 0 |
| 338339 | 1 | 0 | 0 | 0 | 0 |
| 338340 | 1 | 0 | 0 | 0 | 0 |
| 338342 | 1 | 0 | 0 | 0 | 0 |
| 342343 | 1 | 0 | 0 | 0 | 0 |
| 343344 | 1 | 0 | 0 | 0 | 0 |
| 343351 | 2 | 0 | 0 | 0 | 0 |
| 344345 | 1 | 0 | 0 | 0 | 0 |
| 344346 | 2 | 0 | 0 | 0 | 0 |
| 346347 | 1 | 0 | 0 | 0 | 0 |
| 346348 | 1 | 0 | 0 | 0 | 0 |
| 348349 | 2 | 0 | 0 | 0 | 0 |
| 348353 | 1 | 0 | 0 | 0 | 0 |
| 349350 | 1 | 0 | 0 | 0 | 0 |
| 349351 | 1 | 0 | 0 | 0 | 0 |
| 351352 | 1 | 0 | 0 | 0 | 0 |
| 353354 | 1 | 0 | 0 | 0 | 0 |
| 353355 | 1 | 0 | 0 | 0 | 0 |
| 353359 | 1 | 0 | 0 | 0 | 0 |
| 354363 | 1 | 0 | 0 | 0 | 0 |
| 354370 | 2 | 0 | 0 | 0 | 0 |
| 355356 | 1 | 0 | 0 | 0 | 0 |
| 355357 | 1 | 0 | 0 | 0 | 0 |
| 355358 | 1 | 0 | 0 | 0 | 0 |
| 359360 | 1 | 0 | 0 | 0 | 0 |
| 359361 | 1 | 0 | 0 | 0 | 0 |
| 359362 | 1 | 0 | 0 | 0 | 0 |
| 363364 | 1 | 0 | 0 | 0 | 0 |
| 363365 | 2 | 0 | 0 | 0 | 0 |
| 365366 | 1 | 0 | 0 | 0 | 0 |
| 365367 | 1 | 0 | 0 | 0 | 0 |
| 367368 | 2 | 0 | 0 | 0 | 0 |
| 367372 | 1 | 0 | 0 | 0 | 0 |
| 368369 | 1 | 0 | 0 | 0 | 0 |

368370 1 0 0 0 0  
370371 1 0 0 0 0  
M END  
> <NAME>  
D25\_1

\$\$\$\$  
D28\_1  
MOE2012 3D

382391 0 0 1 0 0 0 0 0999 V2000  
5.9050 0.3590 0.7820 O 0 0 0 0 0 0 0 0 0 0 0 0 0 0 0 0  
4.9680 0.2200 0.5600 H 0 0 0 0 0 0 0 0 0 0 0 0 0 0 0 0  
5.9420 1.1360 1.9710 C 0 0 0 0 0 0 0 0 0 0 0 0 0 0 0 0  
5.4290 2.0840 1.7840 H 0 0 0 0 0 0 0 0 0 0 0 0 0 0 0 0  
5.4100 0.5920 2.7590 H 0 0 0 0 0 0 0 0 0 0 0 0 0 0 0 0  
7.3950 1.3690 2.3580 C 0 0 0 0 0 0 0 0 0 0 0 0 0 0 0 0  
7.8950 0.4020 2.4910 H 0 0 0 0 0 0 0 0 0 0 0 0 0 0 0 0  
7.9160 1.8640 1.5280 H 0 0 0 0 0 0 0 0 0 0 0 0 0 0 0 0  
7.5150 2.2060 3.6300 C 0 0 0 0 0 0 0 0 0 0 0 0 0 0 0 0  
7.0200 3.1740 3.4780 H 0 0 0 0 0 0 0 0 0 0 0 0 0 0 0 0  
6.9900 1.7000 4.4510 H 0 0 0 0 0 0 0 0 0 0 0 0 0 0 0 0  
8.9810 2.4250 4.0100 C 0 0 0 0 0 0 0 0 0 0 0 0 0 0 0 0  
9.4640 1.4530 4.1630 H 0 0 0 0 0 0 0 0 0 0 0 0 0 0 0 0  
9.4990 2.9370 3.1900 H 0 0 0 0 0 0 0 0 0 0 0 0 0 0 0 0  
9.0600 3.2210 5.2350 N 0 0 3 0 0 0 0 0 0 0 0 0 0 0 0 0  
8.5940 4.1170 5.0890 H 0 0 0 0 0 0 0 0 0 0 0 0 0 0 0 0  
25.5080 2.2600 11.8490 C 0 0 0 0 0 0 0 0 0 0 0 0 0 0 0 0  
24.8950 3.0330 12.3240 H 0 0 0 0 0 0 0 0 0 0 0 0 0 0 0 0  
25.6650 2.5980 10.8170 H 0 0 0 0 0 0 0 0 0 0 0 0 0 0 0 0  
26.7490 2.2000 12.5720 O 0 0 0 0 0 0 0 0 0 0 0 0 0 0 0 0  
27.8210 1.7150 11.8790 C 0 0 0 0 0 0 0 0 0 0 0 0 0 0 0 0  
29.0390 1.7200 12.7660 C 0 0 0 0 0 0 0 0 0 0 0 0 0 0 0 0  
29.2000 2.7570 13.0790 H 0 0 0 0 0 0 0 0 0 0 0 0 0 0 0 0  
28.8290 1.0980 13.6430 H 0 0 0 0 0 0 0 0 0 0 0 0 0 0 0 0  
30.2670 1.1770 12.0200 C 0 0 0 0 0 0 0 0 0 0 0 0 0 0 0 0  
29.9820 0.2000 11.6140 H 0 0 0 0 0 0 0 0 0 0 0 0 0 0 0 0  
30.4860 1.8290 11.1630 H 0 0 0 0 0 0 0 0 0 0 0 0 0 0 0 0  
27.7950 1.3300 10.7190 O 0 0 0 0 0 0 0 0 0 0 0 0 0 0 0 0  
24.7930 0.9130 11.8900 C 0 0 0 0 0 0 0 0 0 0 0 0 0 0 0 0  
25.4170 0.1620 11.3910 H 0 0 0 0 0 0 0 0 0 0 0 0 0 0 0 0  
24.6760 0.5360 12.9140 H 0 0 0 0 0 0 0 0 0 0 0 0 0 0 0 0  
10.4550 3.4460 5.6220 C 0 0 0 0 0 0 0 0 0 0 0 0 0 0 0 0  
10.9630 2.4850 5.7690 H 0 0 0 0 0 0 0 0 0 0 0 0 0 0 0 0  
10.9860 3.9830 4.8260 H 0 0 0 0 0 0 0 0 0 0 0 0 0 0 0 0  
10.5140 4.2530 6.9170 C 0 0 0 0 0 0 0 0 0 0 0 0 0 0 0 0  
10.0250 5.2230 6.7790 H 0 0 0 0 0 0 0 0 0 0 0 0 0 0 0 0  
10.0130 3.7080 7.7250 H 0 0 0 0 0 0 0 0 0 0 0 0 0 0 0 0  
11.9440 4.5000 7.3280 C 0 0 0 0 0 0 0 0 0 0 0 0 0 0 0 0  
11.9660 5.2490 8.4670 O 0 0 0 0 0 0 0 0 0 0 0 0 0 0 0 0  
13.2670 5.6170 8.9490 C 0 0 0 0 0 0 0 0 0 0 0 0 0 0 0 0  
13.9320 5.9020 8.1230 H 0 0 0 0 0 0 0 0 0 0 0 0 0 0 0 0  
13.1460 6.5210 9.5570 H 0 0 0 0 0 0 0 0 0 0 0 0 0 0 0 0  
13.8770 4.5070 9.7980 C 0 0 0 0 0 0 0 0 0 0 0 0 0 0 0 0  
13.1940 4.2720 10.6230 H 0 0 0 0 0 0 0 0 0 0 0 0 0 0 0 0  
14.0160 3.6070 9.1880 H 0 0 0 0 0 0 0 0 0 0 0 0 0 0 0 0  
12.9300 4.0890 6.7350 O 0 0 0 0 0 0 0 0 0 0 0 0 0 0 0 0  
15.1300 4.9710 10.2960 O 0 0 0 0 0 0 0 0 0 0 0 0 0 0 0 0  
15.8430 4.1180 11.0920 C 0 0 0 0 0 0 0 0 0 0 0 0 0 0 0 0  
17.0670 4.6180 11.5360 C 0 0 0 0 0 0 0 0 0 0 0 0 0 0 0 0  
17.3810 5.6160 11.2410 H 0 0 0 0 0 0 0 0 0 0 0 0 0 0 0 0  
17.8940 3.8480 12.3600 C 0 0 0 0 0 0 0 0 0 0 0 0 0 0 0 0  
18.8430 4.2730 12.6810 H 0 0 0 0 0 0 0 0 0 0 0 0 0 0 0 0  
17.5200 2.5530 12.7640 C 0 0 0 0 0 0 0 0 0 0 0 0 0 0 0 0  
16.2840 2.0660 12.3090 C 0 0 0 0 0 0 0 0 0 0 0 0 0 0 0 0  
15.9290 1.0770 12.5850 H 0 0 0 0 0 0 0 0 0 0 0 0 0 0 0 0  
15.4560 2.8380 11.4820 C 0 0 0 0 0 0 0 0 0 0 0 0 0 0 0 0  
14.5140 2.4040 11.1650 H 0 0 0 0 0 0 0 0 0 0 0 0 0 0 0 0  
18.4580 1.7360 13.6840 C 0 0 0 0 0 0 0 0 0 0 0 0 0 0 0 0  
19.8620 1.5790 13.0540 C 0 0 0 0 0 0 0 0 0 0 0 0 0 0 0 0  
18.4680 2.4610 15.0570 C 0 0 0 0 0 0 0 0 0 0 0 0 0 0 0 0  
18.9170 3.4600 14.9970 H 0 0 0 0 0 0 0 0 0 0 0 0 0 0 0 0  
19.0260 1.8950 15.8110 H 0 0 0 0 0 0 0 0 0 0 0 0 0 0 0 0  
17.4480 2.5890 15.4430 H 0 0 0 0 0 0 0 0 0 0 0 0 0 0 0 0  
17.9510 0.2970 13.9710 C 0 0 0 0 0 0 0 0 0 0 0 0 0 0 0 0  
16.9870 0.3030 14.4930 H 0 0 0 0 0 0 0 0 0 0 0 0 0 0 0 0  
17.8270 -0.2910 13.0540 H 0 0 0 0 0 0 0 0 0 0 0 0 0 0 0 0  
18.6570 -0.2510 14.6090 H 0 0 0 0 0 0 0 0 0 0 0 0 0 0 0 0  
19.9880 1.0870 11.7410 C 0 0 0 0 0 0 0 0 0 0 0 0 0 0 0 0  
19.1030 0.8360 11.1600 H 0 0 0 0 0 0 0 0 0 0 0 0 0 0 0 0  
21.2430 0.9050 11.1510 C 0 0 0 0 0 0 0 0 0 0 0 0 0 0 0 0











|    |    |   |   |   |   |   |
|----|----|---|---|---|---|---|
| 12 | 14 | 1 | 0 | 0 | 0 | 0 |
| 12 | 15 | 1 | 0 | 0 | 0 | 0 |
| 15 | 16 | 1 | 0 | 0 | 0 | 0 |
| 15 | 32 | 1 | 0 | 0 | 0 | 0 |
| 17 | 18 | 1 | 0 | 0 | 0 | 0 |
| 17 | 19 | 1 | 0 | 0 | 0 | 0 |
| 17 | 20 | 1 | 0 | 0 | 0 | 0 |
| 17 | 29 | 1 | 0 | 0 | 0 | 0 |
| 20 | 21 | 1 | 0 | 0 | 0 | 0 |
| 21 | 22 | 1 | 0 | 0 | 0 | 0 |
| 21 | 28 | 2 | 0 | 0 | 0 | 0 |
| 22 | 23 | 1 | 0 | 0 | 0 | 0 |
| 22 | 24 | 1 | 0 | 0 | 0 | 0 |
| 22 | 25 | 1 | 0 | 0 | 0 | 0 |
| 25 | 26 | 1 | 0 | 0 | 0 | 0 |
| 25 | 27 | 1 | 0 | 0 | 0 | 0 |
| 25 | 92 | 1 | 0 | 0 | 0 | 0 |
| 29 | 30 | 1 | 0 | 0 | 0 | 0 |
| 29 | 31 | 1 | 0 | 0 | 0 | 0 |
| 29 | 77 | 1 | 0 | 0 | 0 | 0 |
| 32 | 33 | 1 | 0 | 0 | 0 | 0 |
| 32 | 34 | 1 | 0 | 0 | 0 | 0 |
| 32 | 35 | 1 | 0 | 0 | 0 | 0 |
| 35 | 36 | 1 | 0 | 0 | 0 | 0 |
| 35 | 37 | 1 | 0 | 0 | 0 | 0 |
| 35 | 38 | 1 | 0 | 0 | 0 | 0 |
| 38 | 39 | 1 | 0 | 0 | 0 | 0 |
| 38 | 46 | 2 | 0 | 0 | 0 | 0 |
| 39 | 40 | 1 | 0 | 0 | 0 | 0 |
| 40 | 41 | 1 | 0 | 0 | 0 | 0 |
| 40 | 42 | 1 | 0 | 0 | 0 | 0 |
| 40 | 43 | 1 | 0 | 0 | 0 | 0 |
| 43 | 44 | 1 | 0 | 0 | 0 | 0 |
| 43 | 45 | 1 | 0 | 0 | 0 | 0 |
| 43 | 47 | 1 | 0 | 0 | 0 | 0 |
| 47 | 48 | 1 | 0 | 0 | 0 | 0 |
| 48 | 49 | 1 | 0 | 0 | 0 | 0 |
| 48 | 56 | 2 | 0 | 0 | 0 | 0 |
| 49 | 50 | 1 | 0 | 0 | 0 | 0 |
| 49 | 51 | 2 | 0 | 0 | 0 | 0 |
| 51 | 52 | 1 | 0 | 0 | 0 | 0 |
| 51 | 53 | 1 | 0 | 0 | 0 | 0 |
| 53 | 54 | 2 | 0 | 0 | 0 | 0 |
| 53 | 58 | 1 | 0 | 0 | 0 | 0 |
| 54 | 55 | 1 | 0 | 0 | 0 | 0 |
| 54 | 56 | 1 | 0 | 0 | 0 | 0 |
| 56 | 57 | 1 | 0 | 0 | 0 | 0 |
| 58 | 59 | 1 | 0 | 0 | 0 | 0 |
| 58 | 60 | 1 | 0 | 0 | 0 | 0 |
| 58 | 64 | 1 | 0 | 0 | 0 | 0 |
| 59 | 68 | 1 | 0 | 0 | 0 | 0 |
| 59 | 75 | 2 | 0 | 0 | 0 | 0 |
| 60 | 61 | 1 | 0 | 0 | 0 | 0 |
| 60 | 62 | 1 | 0 | 0 | 0 | 0 |
| 60 | 63 | 1 | 0 | 0 | 0 | 0 |
| 64 | 65 | 1 | 0 | 0 | 0 | 0 |
| 64 | 66 | 1 | 0 | 0 | 0 | 0 |
| 64 | 67 | 1 | 0 | 0 | 0 | 0 |
| 68 | 69 | 1 | 0 | 0 | 0 | 0 |
| 68 | 70 | 2 | 0 | 0 | 0 | 0 |
| 70 | 71 | 1 | 0 | 0 | 0 | 0 |
| 70 | 72 | 1 | 0 | 0 | 0 | 0 |
| 72 | 73 | 2 | 0 | 0 | 0 | 0 |
| 72 | 77 | 1 | 0 | 0 | 0 | 0 |
| 73 | 74 | 1 | 0 | 0 | 0 | 0 |
| 73 | 75 | 1 | 0 | 0 | 0 | 0 |
| 75 | 76 | 1 | 0 | 0 | 0 | 0 |
| 78 | 79 | 1 | 0 | 0 | 0 | 0 |
| 78 | 80 | 1 | 0 | 0 | 0 | 0 |
| 80 | 81 | 1 | 0 | 0 | 0 | 0 |
| 80 | 82 | 1 | 0 | 0 | 0 | 0 |
| 80 | 83 | 1 | 0 | 0 | 0 | 0 |
| 83 | 84 | 1 | 0 | 0 | 0 | 0 |
| 83 | 85 | 1 | 0 | 0 | 0 | 0 |
| 83 | 86 | 1 | 0 | 0 | 0 | 0 |
| 86 | 87 | 1 | 0 | 0 | 0 | 0 |
| 86 | 88 | 1 | 0 | 0 | 0 | 0 |
| 86 | 89 | 1 | 0 | 0 | 0 | 0 |
| 89 | 90 | 1 | 0 | 0 | 0 | 0 |
| 89 | 91 | 1 | 0 | 0 | 0 | 0 |
| 89 | 92 | 1 | 0 | 0 | 0 | 0 |

|        |   |   |   |   |   |
|--------|---|---|---|---|---|
| 92108  | 1 | 0 | 0 | 0 | 0 |
| 93 94  | 1 | 0 | 0 | 0 | 0 |
| 93 95  | 1 | 0 | 0 | 0 | 0 |
| 93 96  | 1 | 0 | 0 | 0 | 0 |
| 93105  | 1 | 0 | 0 | 0 | 0 |
| 96 97  | 1 | 0 | 0 | 0 | 0 |
| 97 98  | 1 | 0 | 0 | 0 | 0 |
| 97104  | 2 | 0 | 0 | 0 | 0 |
| 98 99  | 1 | 0 | 0 | 0 | 0 |
| 98100  | 1 | 0 | 0 | 0 | 0 |
| 98101  | 1 | 0 | 0 | 0 | 0 |
| 101102 | 1 | 0 | 0 | 0 | 0 |
| 101103 | 1 | 0 | 0 | 0 | 0 |
| 101168 | 1 | 0 | 0 | 0 | 0 |
| 105106 | 1 | 0 | 0 | 0 | 0 |
| 105107 | 1 | 0 | 0 | 0 | 0 |
| 105153 | 1 | 0 | 0 | 0 | 0 |
| 108109 | 1 | 0 | 0 | 0 | 0 |
| 108110 | 1 | 0 | 0 | 0 | 0 |
| 108111 | 1 | 0 | 0 | 0 | 0 |
| 111112 | 1 | 0 | 0 | 0 | 0 |
| 111113 | 1 | 0 | 0 | 0 | 0 |
| 111114 | 1 | 0 | 0 | 0 | 0 |
| 114115 | 1 | 0 | 0 | 0 | 0 |
| 114122 | 2 | 0 | 0 | 0 | 0 |
| 115116 | 1 | 0 | 0 | 0 | 0 |
| 116117 | 1 | 0 | 0 | 0 | 0 |
| 116118 | 1 | 0 | 0 | 0 | 0 |
| 116119 | 1 | 0 | 0 | 0 | 0 |
| 119120 | 1 | 0 | 0 | 0 | 0 |
| 119121 | 1 | 0 | 0 | 0 | 0 |
| 119123 | 1 | 0 | 0 | 0 | 0 |
| 123124 | 1 | 0 | 0 | 0 | 0 |
| 124125 | 1 | 0 | 0 | 0 | 0 |
| 124132 | 2 | 0 | 0 | 0 | 0 |
| 125126 | 1 | 0 | 0 | 0 | 0 |
| 125127 | 2 | 0 | 0 | 0 | 0 |
| 127128 | 1 | 0 | 0 | 0 | 0 |
| 127129 | 1 | 0 | 0 | 0 | 0 |
| 129130 | 2 | 0 | 0 | 0 | 0 |
| 129134 | 1 | 0 | 0 | 0 | 0 |
| 130131 | 1 | 0 | 0 | 0 | 0 |
| 130132 | 1 | 0 | 0 | 0 | 0 |
| 132133 | 1 | 0 | 0 | 0 | 0 |
| 134135 | 1 | 0 | 0 | 0 | 0 |
| 134136 | 1 | 0 | 0 | 0 | 0 |
| 134140 | 1 | 0 | 0 | 0 | 0 |
| 135144 | 1 | 0 | 0 | 0 | 0 |
| 135151 | 2 | 0 | 0 | 0 | 0 |
| 136137 | 1 | 0 | 0 | 0 | 0 |
| 136138 | 1 | 0 | 0 | 0 | 0 |
| 136139 | 1 | 0 | 0 | 0 | 0 |
| 140141 | 1 | 0 | 0 | 0 | 0 |
| 140142 | 1 | 0 | 0 | 0 | 0 |
| 140143 | 1 | 0 | 0 | 0 | 0 |
| 144145 | 1 | 0 | 0 | 0 | 0 |
| 144146 | 2 | 0 | 0 | 0 | 0 |
| 146147 | 1 | 0 | 0 | 0 | 0 |
| 146148 | 1 | 0 | 0 | 0 | 0 |
| 148149 | 2 | 0 | 0 | 0 | 0 |
| 148153 | 1 | 0 | 0 | 0 | 0 |
| 149150 | 1 | 0 | 0 | 0 | 0 |
| 149151 | 1 | 0 | 0 | 0 | 0 |
| 151152 | 1 | 0 | 0 | 0 | 0 |
| 154155 | 1 | 0 | 0 | 0 | 0 |
| 154156 | 1 | 0 | 0 | 0 | 0 |
| 156157 | 1 | 0 | 0 | 0 | 0 |
| 156158 | 1 | 0 | 0 | 0 | 0 |
| 156159 | 1 | 0 | 0 | 0 | 0 |
| 159160 | 1 | 0 | 0 | 0 | 0 |
| 159161 | 1 | 0 | 0 | 0 | 0 |
| 159162 | 1 | 0 | 0 | 0 | 0 |
| 162163 | 1 | 0 | 0 | 0 | 0 |
| 162164 | 1 | 0 | 0 | 0 | 0 |
| 162165 | 1 | 0 | 0 | 0 | 0 |
| 165166 | 1 | 0 | 0 | 0 | 0 |
| 165167 | 1 | 0 | 0 | 0 | 0 |
| 165168 | 1 | 0 | 0 | 0 | 0 |
| 168184 | 1 | 0 | 0 | 0 | 0 |
| 169170 | 1 | 0 | 0 | 0 | 0 |
| 169171 | 1 | 0 | 0 | 0 | 0 |

|        |   |   |   |   |   |
|--------|---|---|---|---|---|
| 169172 | 1 | 0 | 0 | 0 | 0 |
| 169181 | 1 | 0 | 0 | 0 | 0 |
| 172173 | 1 | 0 | 0 | 0 | 0 |
| 173174 | 1 | 0 | 0 | 0 | 0 |
| 173180 | 2 | 0 | 0 | 0 | 0 |
| 174175 | 1 | 0 | 0 | 0 | 0 |
| 174176 | 1 | 0 | 0 | 0 | 0 |
| 174177 | 1 | 0 | 0 | 0 | 0 |
| 177178 | 1 | 0 | 0 | 0 | 0 |
| 177179 | 1 | 0 | 0 | 0 | 0 |
| 177244 | 1 | 0 | 0 | 0 | 0 |
| 181182 | 1 | 0 | 0 | 0 | 0 |
| 181183 | 1 | 0 | 0 | 0 | 0 |
| 181229 | 1 | 0 | 0 | 0 | 0 |
| 184185 | 1 | 0 | 0 | 0 | 0 |
| 184186 | 1 | 0 | 0 | 0 | 0 |
| 184187 | 1 | 0 | 0 | 0 | 0 |
| 187188 | 1 | 0 | 0 | 0 | 0 |
| 187189 | 1 | 0 | 0 | 0 | 0 |
| 187190 | 1 | 0 | 0 | 0 | 0 |
| 190191 | 1 | 0 | 0 | 0 | 0 |
| 190198 | 2 | 0 | 0 | 0 | 0 |
| 191192 | 1 | 0 | 0 | 0 | 0 |
| 192193 | 1 | 0 | 0 | 0 | 0 |
| 192194 | 1 | 0 | 0 | 0 | 0 |
| 192195 | 1 | 0 | 0 | 0 | 0 |
| 195196 | 1 | 0 | 0 | 0 | 0 |
| 195197 | 1 | 0 | 0 | 0 | 0 |
| 195199 | 1 | 0 | 0 | 0 | 0 |
| 199200 | 1 | 0 | 0 | 0 | 0 |
| 200201 | 1 | 0 | 0 | 0 | 0 |
| 200208 | 2 | 0 | 0 | 0 | 0 |
| 201202 | 1 | 0 | 0 | 0 | 0 |
| 201203 | 2 | 0 | 0 | 0 | 0 |
| 203204 | 1 | 0 | 0 | 0 | 0 |
| 203205 | 1 | 0 | 0 | 0 | 0 |
| 205206 | 2 | 0 | 0 | 0 | 0 |
| 205210 | 1 | 0 | 0 | 0 | 0 |
| 206207 | 1 | 0 | 0 | 0 | 0 |
| 206208 | 1 | 0 | 0 | 0 | 0 |
| 208209 | 1 | 0 | 0 | 0 | 0 |
| 210211 | 1 | 0 | 0 | 0 | 0 |
| 210212 | 1 | 0 | 0 | 0 | 0 |
| 210216 | 1 | 0 | 0 | 0 | 0 |
| 211220 | 1 | 0 | 0 | 0 | 0 |
| 211227 | 2 | 0 | 0 | 0 | 0 |
| 212213 | 1 | 0 | 0 | 0 | 0 |
| 212214 | 1 | 0 | 0 | 0 | 0 |
| 212215 | 1 | 0 | 0 | 0 | 0 |
| 216217 | 1 | 0 | 0 | 0 | 0 |
| 216218 | 1 | 0 | 0 | 0 | 0 |
| 216219 | 1 | 0 | 0 | 0 | 0 |
| 220221 | 1 | 0 | 0 | 0 | 0 |
| 220222 | 2 | 0 | 0 | 0 | 0 |
| 222223 | 1 | 0 | 0 | 0 | 0 |
| 222224 | 1 | 0 | 0 | 0 | 0 |
| 224225 | 2 | 0 | 0 | 0 | 0 |
| 224229 | 1 | 0 | 0 | 0 | 0 |
| 225226 | 1 | 0 | 0 | 0 | 0 |
| 225227 | 1 | 0 | 0 | 0 | 0 |
| 227228 | 1 | 0 | 0 | 0 | 0 |
| 230231 | 1 | 0 | 0 | 0 | 0 |
| 230232 | 1 | 0 | 0 | 0 | 0 |
| 232233 | 1 | 0 | 0 | 0 | 0 |
| 232234 | 1 | 0 | 0 | 0 | 0 |
| 232235 | 1 | 0 | 0 | 0 | 0 |
| 235236 | 1 | 0 | 0 | 0 | 0 |
| 235237 | 1 | 0 | 0 | 0 | 0 |
| 235238 | 1 | 0 | 0 | 0 | 0 |
| 238239 | 1 | 0 | 0 | 0 | 0 |
| 238240 | 1 | 0 | 0 | 0 | 0 |
| 238241 | 1 | 0 | 0 | 0 | 0 |
| 241242 | 1 | 0 | 0 | 0 | 0 |
| 241243 | 1 | 0 | 0 | 0 | 0 |
| 241244 | 1 | 0 | 0 | 0 | 0 |
| 244260 | 1 | 0 | 0 | 0 | 0 |
| 245246 | 1 | 0 | 0 | 0 | 0 |
| 245247 | 1 | 0 | 0 | 0 | 0 |
| 245248 | 1 | 0 | 0 | 0 | 0 |
| 245257 | 1 | 0 | 0 | 0 | 0 |
| 248249 | 1 | 0 | 0 | 0 | 0 |

|        |   |   |   |   |   |
|--------|---|---|---|---|---|
| 249250 | 1 | 0 | 0 | 0 | 0 |
| 249256 | 2 | 0 | 0 | 0 | 0 |
| 250251 | 1 | 0 | 0 | 0 | 0 |
| 250252 | 1 | 0 | 0 | 0 | 0 |
| 250253 | 1 | 0 | 0 | 0 | 0 |
| 253254 | 1 | 0 | 0 | 0 | 0 |
| 253255 | 1 | 0 | 0 | 0 | 0 |
| 253320 | 1 | 0 | 0 | 0 | 0 |
| 257258 | 1 | 0 | 0 | 0 | 0 |
| 257259 | 1 | 0 | 0 | 0 | 0 |
| 257305 | 1 | 0 | 0 | 0 | 0 |
| 260261 | 1 | 0 | 0 | 0 | 0 |
| 260262 | 1 | 0 | 0 | 0 | 0 |
| 260263 | 1 | 0 | 0 | 0 | 0 |
| 263264 | 1 | 0 | 0 | 0 | 0 |
| 263265 | 1 | 0 | 0 | 0 | 0 |
| 263266 | 1 | 0 | 0 | 0 | 0 |
| 266267 | 1 | 0 | 0 | 0 | 0 |
| 266274 | 2 | 0 | 0 | 0 | 0 |
| 267268 | 1 | 0 | 0 | 0 | 0 |
| 268269 | 1 | 0 | 0 | 0 | 0 |
| 268270 | 1 | 0 | 0 | 0 | 0 |
| 268271 | 1 | 0 | 0 | 0 | 0 |
| 271272 | 1 | 0 | 0 | 0 | 0 |
| 271273 | 1 | 0 | 0 | 0 | 0 |
| 271275 | 1 | 0 | 0 | 0 | 0 |
| 275276 | 1 | 0 | 0 | 0 | 0 |
| 276277 | 1 | 0 | 0 | 0 | 0 |
| 276284 | 2 | 0 | 0 | 0 | 0 |
| 277278 | 1 | 0 | 0 | 0 | 0 |
| 277279 | 2 | 0 | 0 | 0 | 0 |
| 279280 | 1 | 0 | 0 | 0 | 0 |
| 279281 | 1 | 0 | 0 | 0 | 0 |
| 281282 | 2 | 0 | 0 | 0 | 0 |
| 281286 | 1 | 0 | 0 | 0 | 0 |
| 282283 | 1 | 0 | 0 | 0 | 0 |
| 282284 | 1 | 0 | 0 | 0 | 0 |
| 284285 | 1 | 0 | 0 | 0 | 0 |
| 286287 | 1 | 0 | 0 | 0 | 0 |
| 286288 | 1 | 0 | 0 | 0 | 0 |
| 286292 | 1 | 0 | 0 | 0 | 0 |
| 287296 | 1 | 0 | 0 | 0 | 0 |
| 287303 | 2 | 0 | 0 | 0 | 0 |
| 288289 | 1 | 0 | 0 | 0 | 0 |
| 288290 | 1 | 0 | 0 | 0 | 0 |
| 288291 | 1 | 0 | 0 | 0 | 0 |
| 292293 | 1 | 0 | 0 | 0 | 0 |
| 292294 | 1 | 0 | 0 | 0 | 0 |
| 292295 | 1 | 0 | 0 | 0 | 0 |
| 296297 | 1 | 0 | 0 | 0 | 0 |
| 296298 | 2 | 0 | 0 | 0 | 0 |
| 298299 | 1 | 0 | 0 | 0 | 0 |
| 298300 | 1 | 0 | 0 | 0 | 0 |
| 300301 | 2 | 0 | 0 | 0 | 0 |
| 300305 | 1 | 0 | 0 | 0 | 0 |
| 301302 | 1 | 0 | 0 | 0 | 0 |
| 301303 | 1 | 0 | 0 | 0 | 0 |
| 303304 | 1 | 0 | 0 | 0 | 0 |
| 306307 | 1 | 0 | 0 | 0 | 0 |
| 306308 | 1 | 0 | 0 | 0 | 0 |
| 308309 | 1 | 0 | 0 | 0 | 0 |
| 308310 | 1 | 0 | 0 | 0 | 0 |
| 308311 | 1 | 0 | 0 | 0 | 0 |
| 311312 | 1 | 0 | 0 | 0 | 0 |
| 311313 | 1 | 0 | 0 | 0 | 0 |
| 311314 | 1 | 0 | 0 | 0 | 0 |
| 314315 | 1 | 0 | 0 | 0 | 0 |
| 314316 | 1 | 0 | 0 | 0 | 0 |
| 314317 | 1 | 0 | 0 | 0 | 0 |
| 317318 | 1 | 0 | 0 | 0 | 0 |
| 317319 | 1 | 0 | 0 | 0 | 0 |
| 317320 | 1 | 0 | 0 | 0 | 0 |
| 320337 | 1 | 0 | 0 | 0 | 0 |
| 321322 | 1 | 0 | 0 | 0 | 0 |
| 321323 | 1 | 0 | 0 | 0 | 0 |
| 321324 | 1 | 0 | 0 | 0 | 0 |
| 321334 | 1 | 0 | 0 | 0 | 0 |
| 324325 | 1 | 0 | 0 | 0 | 0 |
| 325326 | 1 | 0 | 0 | 0 | 0 |
| 325333 | 2 | 0 | 0 | 0 | 0 |
| 326327 | 1 | 0 | 0 | 0 | 0 |

326328 1 0 0 0 0  
326329 1 0 0 0 0  
329330 1 0 0 0 0  
329331 1 0 0 0 0  
329332 1 0 0 0 0  
334335 1 0 0 0 0  
334336 1 0 0 0 0  
334382 1 0 0 0 0  
337338 1 0 0 0 0  
337339 1 0 0 0 0  
337340 1 0 0 0 0  
340341 1 0 0 0 0  
340342 1 0 0 0 0  
340343 1 0 0 0 0  
343344 1 0 0 0 0  
343351 2 0 0 0 0  
344345 1 0 0 0 0  
345346 1 0 0 0 0  
345347 1 0 0 0 0  
345348 1 0 0 0 0  
348349 1 0 0 0 0  
348350 1 0 0 0 0  
348352 1 0 0 0 0  
352353 1 0 0 0 0  
353354 1 0 0 0 0  
353361 2 0 0 0 0  
354355 1 0 0 0 0  
354356 2 0 0 0 0  
356357 1 0 0 0 0  
356358 1 0 0 0 0  
358359 2 0 0 0 0  
358363 1 0 0 0 0  
359360 1 0 0 0 0  
359361 1 0 0 0 0  
361362 1 0 0 0 0  
363364 1 0 0 0 0  
363365 1 0 0 0 0  
363369 1 0 0 0 0  
364373 1 0 0 0 0  
364380 2 0 0 0 0  
365366 1 0 0 0 0  
365367 1 0 0 0 0  
365368 1 0 0 0 0  
369370 1 0 0 0 0  
369371 1 0 0 0 0  
369372 1 0 0 0 0  
373374 1 0 0 0 0  
373375 2 0 0 0 0  
375376 1 0 0 0 0  
375377 1 0 0 0 0  
377378 2 0 0 0 0  
377382 1 0 0 0 0  
378379 1 0 0 0 0  
378380 1 0 0 0 0  
380381 1 0 0 0 0

M END  
> <NAME>  
D28\_1

\$\$\$\$  
D32\_1  
MOE2012 3D

397406 0 0 1 0 0 0 0 0999 V2000  
-3.0740 5.9340 -26.7950 O 0 0 0 0 0 0 0 0 0 0 0 0 0 0 0  
-3.8910 6.4040 -26.5550 H 0 0 0 0 0 0 0 0 0 0 0 0 0 0 0  
-2.1470 6.1410 -25.7400 C 0 0 0 0 0 0 0 0 0 0 0 0 0 0 0  
-1.9800 7.2170 -25.6290 H 0 0 0 0 0 0 0 0 0 0 0 0 0 0 0  
-2.5790 5.7490 -24.8140 H 0 0 0 0 0 0 0 0 0 0 0 0 0 0 0  
-0.8490 5.4220 -26.0820 C 0 0 0 0 0 0 0 0 0 0 0 0 0 0 0  
-1.0560 4.3570 -26.2420 H 0 0 0 0 0 0 0 0 0 0 0 0 0 0 0  
-0.4670 5.8000 -27.0380 H 0 0 0 0 0 0 0 0 0 0 0 0 0 0 0  
0.2020 5.5970 -24.9870 C 0 0 0 0 0 0 0 0 0 0 0 0 0 0 0  
0.4020 6.6640 -24.8370 H 0 0 0 0 0 0 0 0 0 0 0 0 0 0 0  
-0.1860 5.2030 -24.0390 H 0 0 0 0 0 0 0 0 0 0 0 0 0 0 0  
1.5040 4.8770 -25.3480 C 0 0 0 0 0 0 0 0 0 0 0 0 0 0 0  
1.3000 3.8090 -25.5000 H 0 0 0 0 0 0 0 0 0 0 0 0 0 0 0  
1.8860 5.2710 -26.2980 H 0 0 0 0 0 0 0 0 0 0 0 0 0 0 0  
2.5590 5.0520 -24.2530 C 0 0 0 0 0 0 0 0 0 0 0 0 0 0 0  
2.7530 6.1220 -24.1060 H 0 0 0 0 0 0 0 0 0 0 0 0 0 0 0  
2.1750 4.6430 -23.3120 H 0 0 0 0 0 0 0 0 0 0 0 0 0 0 0













|     |     |   |   |   |   |   |
|-----|-----|---|---|---|---|---|
| 24  | 31  | 2 | 0 | 0 | 0 | 0 |
| 25  | 26  | 1 | 0 | 0 | 0 | 0 |
| 25  | 27  | 1 | 0 | 0 | 0 | 0 |
| 25  | 28  | 1 | 0 | 0 | 0 | 0 |
| 28  | 29  | 1 | 0 | 0 | 0 | 0 |
| 28  | 30  | 1 | 0 | 0 | 0 | 0 |
| 28  | 98  | 1 | 0 | 0 | 0 | 0 |
| 32  | 33  | 1 | 0 | 0 | 0 | 0 |
| 32  | 34  | 1 | 0 | 0 | 0 | 0 |
| 32  | 80  | 1 | 0 | 0 | 0 | 0 |
| 35  | 36  | 1 | 0 | 0 | 0 | 0 |
| 35  | 37  | 1 | 0 | 0 | 0 | 0 |
| 35  | 38  | 1 | 0 | 0 | 0 | 0 |
| 38  | 39  | 1 | 0 | 0 | 0 | 0 |
| 38  | 40  | 1 | 0 | 0 | 0 | 0 |
| 38  | 41  | 1 | 0 | 0 | 0 | 0 |
| 41  | 42  | 1 | 0 | 0 | 0 | 0 |
| 41  | 49  | 2 | 0 | 0 | 0 | 0 |
| 42  | 43  | 1 | 0 | 0 | 0 | 0 |
| 43  | 44  | 1 | 0 | 0 | 0 | 0 |
| 43  | 45  | 1 | 0 | 0 | 0 | 0 |
| 43  | 46  | 1 | 0 | 0 | 0 | 0 |
| 46  | 47  | 1 | 0 | 0 | 0 | 0 |
| 46  | 48  | 1 | 0 | 0 | 0 | 0 |
| 46  | 50  | 1 | 0 | 0 | 0 | 0 |
| 50  | 51  | 1 | 0 | 0 | 0 | 0 |
| 51  | 52  | 1 | 0 | 0 | 0 | 0 |
| 51  | 59  | 2 | 0 | 0 | 0 | 0 |
| 52  | 53  | 1 | 0 | 0 | 0 | 0 |
| 52  | 54  | 2 | 0 | 0 | 0 | 0 |
| 54  | 55  | 1 | 0 | 0 | 0 | 0 |
| 54  | 56  | 1 | 0 | 0 | 0 | 0 |
| 56  | 57  | 2 | 0 | 0 | 0 | 0 |
| 56  | 61  | 1 | 0 | 0 | 0 | 0 |
| 57  | 58  | 1 | 0 | 0 | 0 | 0 |
| 57  | 59  | 1 | 0 | 0 | 0 | 0 |
| 59  | 60  | 1 | 0 | 0 | 0 | 0 |
| 61  | 62  | 1 | 0 | 0 | 0 | 0 |
| 61  | 63  | 1 | 0 | 0 | 0 | 0 |
| 61  | 67  | 1 | 0 | 0 | 0 | 0 |
| 62  | 71  | 1 | 0 | 0 | 0 | 0 |
| 62  | 78  | 2 | 0 | 0 | 0 | 0 |
| 63  | 64  | 1 | 0 | 0 | 0 | 0 |
| 63  | 65  | 1 | 0 | 0 | 0 | 0 |
| 63  | 66  | 1 | 0 | 0 | 0 | 0 |
| 67  | 68  | 1 | 0 | 0 | 0 | 0 |
| 67  | 69  | 1 | 0 | 0 | 0 | 0 |
| 67  | 70  | 1 | 0 | 0 | 0 | 0 |
| 71  | 72  | 1 | 0 | 0 | 0 | 0 |
| 71  | 73  | 2 | 0 | 0 | 0 | 0 |
| 73  | 74  | 1 | 0 | 0 | 0 | 0 |
| 73  | 75  | 1 | 0 | 0 | 0 | 0 |
| 75  | 76  | 2 | 0 | 0 | 0 | 0 |
| 75  | 80  | 1 | 0 | 0 | 0 | 0 |
| 76  | 77  | 1 | 0 | 0 | 0 | 0 |
| 76  | 78  | 1 | 0 | 0 | 0 | 0 |
| 78  | 79  | 1 | 0 | 0 | 0 | 0 |
| 81  | 82  | 1 | 0 | 0 | 0 | 0 |
| 81  | 83  | 1 | 0 | 0 | 0 | 0 |
| 83  | 84  | 1 | 0 | 0 | 0 | 0 |
| 83  | 85  | 1 | 0 | 0 | 0 | 0 |
| 83  | 86  | 1 | 0 | 0 | 0 | 0 |
| 86  | 87  | 1 | 0 | 0 | 0 | 0 |
| 86  | 88  | 1 | 0 | 0 | 0 | 0 |
| 86  | 89  | 1 | 0 | 0 | 0 | 0 |
| 89  | 90  | 1 | 0 | 0 | 0 | 0 |
| 89  | 91  | 1 | 0 | 0 | 0 | 0 |
| 89  | 92  | 1 | 0 | 0 | 0 | 0 |
| 92  | 93  | 1 | 0 | 0 | 0 | 0 |
| 92  | 94  | 1 | 0 | 0 | 0 | 0 |
| 92  | 95  | 1 | 0 | 0 | 0 | 0 |
| 95  | 96  | 1 | 0 | 0 | 0 | 0 |
| 95  | 97  | 1 | 0 | 0 | 0 | 0 |
| 95  | 98  | 1 | 0 | 0 | 0 | 0 |
| 98  | 114 | 1 | 0 | 0 | 0 | 0 |
| 99  | 100 | 1 | 0 | 0 | 0 | 0 |
| 99  | 101 | 1 | 0 | 0 | 0 | 0 |
| 99  | 102 | 1 | 0 | 0 | 0 | 0 |
| 99  | 111 | 1 | 0 | 0 | 0 | 0 |
| 102 | 103 | 1 | 0 | 0 | 0 | 0 |
| 103 | 104 | 1 | 0 | 0 | 0 | 0 |

|        |   |   |   |   |   |
|--------|---|---|---|---|---|
| 103110 | 2 | 0 | 0 | 0 | 0 |
| 104105 | 1 | 0 | 0 | 0 | 0 |
| 104106 | 1 | 0 | 0 | 0 | 0 |
| 104107 | 1 | 0 | 0 | 0 | 0 |
| 107108 | 1 | 0 | 0 | 0 | 0 |
| 107109 | 1 | 0 | 0 | 0 | 0 |
| 107177 | 1 | 0 | 0 | 0 | 0 |
| 111112 | 1 | 0 | 0 | 0 | 0 |
| 111113 | 1 | 0 | 0 | 0 | 0 |
| 111159 | 1 | 0 | 0 | 0 | 0 |
| 114115 | 1 | 0 | 0 | 0 | 0 |
| 114116 | 1 | 0 | 0 | 0 | 0 |
| 114117 | 1 | 0 | 0 | 0 | 0 |
| 117118 | 1 | 0 | 0 | 0 | 0 |
| 117119 | 1 | 0 | 0 | 0 | 0 |
| 117120 | 1 | 0 | 0 | 0 | 0 |
| 120121 | 1 | 0 | 0 | 0 | 0 |
| 120128 | 2 | 0 | 0 | 0 | 0 |
| 121122 | 1 | 0 | 0 | 0 | 0 |
| 122123 | 1 | 0 | 0 | 0 | 0 |
| 122124 | 1 | 0 | 0 | 0 | 0 |
| 122125 | 1 | 0 | 0 | 0 | 0 |
| 125126 | 1 | 0 | 0 | 0 | 0 |
| 125127 | 1 | 0 | 0 | 0 | 0 |
| 125129 | 1 | 0 | 0 | 0 | 0 |
| 129130 | 1 | 0 | 0 | 0 | 0 |
| 130131 | 1 | 0 | 0 | 0 | 0 |
| 130138 | 2 | 0 | 0 | 0 | 0 |
| 131132 | 1 | 0 | 0 | 0 | 0 |
| 131133 | 2 | 0 | 0 | 0 | 0 |
| 133134 | 1 | 0 | 0 | 0 | 0 |
| 133135 | 1 | 0 | 0 | 0 | 0 |
| 135136 | 2 | 0 | 0 | 0 | 0 |
| 135140 | 1 | 0 | 0 | 0 | 0 |
| 136137 | 1 | 0 | 0 | 0 | 0 |
| 136138 | 1 | 0 | 0 | 0 | 0 |
| 138139 | 1 | 0 | 0 | 0 | 0 |
| 140141 | 1 | 0 | 0 | 0 | 0 |
| 140142 | 1 | 0 | 0 | 0 | 0 |
| 140146 | 1 | 0 | 0 | 0 | 0 |
| 141150 | 1 | 0 | 0 | 0 | 0 |
| 141157 | 2 | 0 | 0 | 0 | 0 |
| 142143 | 1 | 0 | 0 | 0 | 0 |
| 142144 | 1 | 0 | 0 | 0 | 0 |
| 142145 | 1 | 0 | 0 | 0 | 0 |
| 146147 | 1 | 0 | 0 | 0 | 0 |
| 146148 | 1 | 0 | 0 | 0 | 0 |
| 146149 | 1 | 0 | 0 | 0 | 0 |
| 150151 | 1 | 0 | 0 | 0 | 0 |
| 150152 | 2 | 0 | 0 | 0 | 0 |
| 152153 | 1 | 0 | 0 | 0 | 0 |
| 152154 | 1 | 0 | 0 | 0 | 0 |
| 154155 | 2 | 0 | 0 | 0 | 0 |
| 154159 | 1 | 0 | 0 | 0 | 0 |
| 155156 | 1 | 0 | 0 | 0 | 0 |
| 155157 | 1 | 0 | 0 | 0 | 0 |
| 157158 | 1 | 0 | 0 | 0 | 0 |
| 160161 | 1 | 0 | 0 | 0 | 0 |
| 160162 | 1 | 0 | 0 | 0 | 0 |
| 162163 | 1 | 0 | 0 | 0 | 0 |
| 162164 | 1 | 0 | 0 | 0 | 0 |
| 162165 | 1 | 0 | 0 | 0 | 0 |
| 165166 | 1 | 0 | 0 | 0 | 0 |
| 165167 | 1 | 0 | 0 | 0 | 0 |
| 165168 | 1 | 0 | 0 | 0 | 0 |
| 168169 | 1 | 0 | 0 | 0 | 0 |
| 168170 | 1 | 0 | 0 | 0 | 0 |
| 168171 | 1 | 0 | 0 | 0 | 0 |
| 171172 | 1 | 0 | 0 | 0 | 0 |
| 171173 | 1 | 0 | 0 | 0 | 0 |
| 171174 | 1 | 0 | 0 | 0 | 0 |
| 174175 | 1 | 0 | 0 | 0 | 0 |
| 174176 | 1 | 0 | 0 | 0 | 0 |
| 174177 | 1 | 0 | 0 | 0 | 0 |
| 177193 | 1 | 0 | 0 | 0 | 0 |
| 178179 | 1 | 0 | 0 | 0 | 0 |
| 178180 | 1 | 0 | 0 | 0 | 0 |
| 178181 | 1 | 0 | 0 | 0 | 0 |
| 178190 | 1 | 0 | 0 | 0 | 0 |
| 181182 | 1 | 0 | 0 | 0 | 0 |
| 182183 | 1 | 0 | 0 | 0 | 0 |

|        |   |   |   |   |   |
|--------|---|---|---|---|---|
| 182189 | 2 | 0 | 0 | 0 | 0 |
| 183184 | 1 | 0 | 0 | 0 | 0 |
| 183185 | 1 | 0 | 0 | 0 | 0 |
| 183186 | 1 | 0 | 0 | 0 | 0 |
| 186187 | 1 | 0 | 0 | 0 | 0 |
| 186188 | 1 | 0 | 0 | 0 | 0 |
| 186256 | 1 | 0 | 0 | 0 | 0 |
| 190191 | 1 | 0 | 0 | 0 | 0 |
| 190192 | 1 | 0 | 0 | 0 | 0 |
| 190238 | 1 | 0 | 0 | 0 | 0 |
| 193194 | 1 | 0 | 0 | 0 | 0 |
| 193195 | 1 | 0 | 0 | 0 | 0 |
| 193196 | 1 | 0 | 0 | 0 | 0 |
| 196197 | 1 | 0 | 0 | 0 | 0 |
| 196198 | 1 | 0 | 0 | 0 | 0 |
| 196199 | 1 | 0 | 0 | 0 | 0 |
| 199200 | 1 | 0 | 0 | 0 | 0 |
| 199207 | 2 | 0 | 0 | 0 | 0 |
| 200201 | 1 | 0 | 0 | 0 | 0 |
| 201202 | 1 | 0 | 0 | 0 | 0 |
| 201203 | 1 | 0 | 0 | 0 | 0 |
| 201204 | 1 | 0 | 0 | 0 | 0 |
| 204205 | 1 | 0 | 0 | 0 | 0 |
| 204206 | 1 | 0 | 0 | 0 | 0 |
| 204208 | 1 | 0 | 0 | 0 | 0 |
| 208209 | 1 | 0 | 0 | 0 | 0 |
| 209210 | 1 | 0 | 0 | 0 | 0 |
| 209217 | 2 | 0 | 0 | 0 | 0 |
| 210211 | 1 | 0 | 0 | 0 | 0 |
| 210212 | 2 | 0 | 0 | 0 | 0 |
| 212213 | 1 | 0 | 0 | 0 | 0 |
| 212214 | 1 | 0 | 0 | 0 | 0 |
| 214215 | 2 | 0 | 0 | 0 | 0 |
| 214219 | 1 | 0 | 0 | 0 | 0 |
| 215216 | 1 | 0 | 0 | 0 | 0 |
| 215217 | 1 | 0 | 0 | 0 | 0 |
| 217218 | 1 | 0 | 0 | 0 | 0 |
| 219220 | 1 | 0 | 0 | 0 | 0 |
| 219221 | 1 | 0 | 0 | 0 | 0 |
| 219225 | 1 | 0 | 0 | 0 | 0 |
| 220229 | 1 | 0 | 0 | 0 | 0 |
| 220236 | 2 | 0 | 0 | 0 | 0 |
| 221222 | 1 | 0 | 0 | 0 | 0 |
| 221223 | 1 | 0 | 0 | 0 | 0 |
| 221224 | 1 | 0 | 0 | 0 | 0 |
| 225226 | 1 | 0 | 0 | 0 | 0 |
| 225227 | 1 | 0 | 0 | 0 | 0 |
| 225228 | 1 | 0 | 0 | 0 | 0 |
| 229230 | 1 | 0 | 0 | 0 | 0 |
| 229231 | 2 | 0 | 0 | 0 | 0 |
| 231232 | 1 | 0 | 0 | 0 | 0 |
| 231233 | 1 | 0 | 0 | 0 | 0 |
| 233234 | 2 | 0 | 0 | 0 | 0 |
| 233238 | 1 | 0 | 0 | 0 | 0 |
| 234235 | 1 | 0 | 0 | 0 | 0 |
| 234236 | 1 | 0 | 0 | 0 | 0 |
| 236237 | 1 | 0 | 0 | 0 | 0 |
| 239240 | 1 | 0 | 0 | 0 | 0 |
| 239241 | 1 | 0 | 0 | 0 | 0 |
| 241242 | 1 | 0 | 0 | 0 | 0 |
| 241243 | 1 | 0 | 0 | 0 | 0 |
| 241244 | 1 | 0 | 0 | 0 | 0 |
| 244245 | 1 | 0 | 0 | 0 | 0 |
| 244246 | 1 | 0 | 0 | 0 | 0 |
| 244247 | 1 | 0 | 0 | 0 | 0 |
| 247248 | 1 | 0 | 0 | 0 | 0 |
| 247249 | 1 | 0 | 0 | 0 | 0 |
| 247250 | 1 | 0 | 0 | 0 | 0 |
| 250251 | 1 | 0 | 0 | 0 | 0 |
| 250252 | 1 | 0 | 0 | 0 | 0 |
| 250253 | 1 | 0 | 0 | 0 | 0 |
| 253254 | 1 | 0 | 0 | 0 | 0 |
| 253255 | 1 | 0 | 0 | 0 | 0 |
| 253256 | 1 | 0 | 0 | 0 | 0 |
| 256272 | 1 | 0 | 0 | 0 | 0 |
| 257258 | 1 | 0 | 0 | 0 | 0 |
| 257259 | 1 | 0 | 0 | 0 | 0 |
| 257260 | 1 | 0 | 0 | 0 | 0 |
| 257269 | 1 | 0 | 0 | 0 | 0 |
| 260261 | 1 | 0 | 0 | 0 | 0 |
| 261262 | 1 | 0 | 0 | 0 | 0 |

|        |   |   |   |   |   |
|--------|---|---|---|---|---|
| 261268 | 2 | 0 | 0 | 0 | 0 |
| 262263 | 1 | 0 | 0 | 0 | 0 |
| 262264 | 1 | 0 | 0 | 0 | 0 |
| 262265 | 1 | 0 | 0 | 0 | 0 |
| 265266 | 1 | 0 | 0 | 0 | 0 |
| 265267 | 1 | 0 | 0 | 0 | 0 |
| 265335 | 1 | 0 | 0 | 0 | 0 |
| 269270 | 1 | 0 | 0 | 0 | 0 |
| 269271 | 1 | 0 | 0 | 0 | 0 |
| 269317 | 1 | 0 | 0 | 0 | 0 |
| 272273 | 1 | 0 | 0 | 0 | 0 |
| 272274 | 1 | 0 | 0 | 0 | 0 |
| 272275 | 1 | 0 | 0 | 0 | 0 |
| 275276 | 1 | 0 | 0 | 0 | 0 |
| 275277 | 1 | 0 | 0 | 0 | 0 |
| 275278 | 1 | 0 | 0 | 0 | 0 |
| 278279 | 1 | 0 | 0 | 0 | 0 |
| 278286 | 2 | 0 | 0 | 0 | 0 |
| 279280 | 1 | 0 | 0 | 0 | 0 |
| 280281 | 1 | 0 | 0 | 0 | 0 |
| 280282 | 1 | 0 | 0 | 0 | 0 |
| 280283 | 1 | 0 | 0 | 0 | 0 |
| 283284 | 1 | 0 | 0 | 0 | 0 |
| 283285 | 1 | 0 | 0 | 0 | 0 |
| 283287 | 1 | 0 | 0 | 0 | 0 |
| 287288 | 1 | 0 | 0 | 0 | 0 |
| 288289 | 1 | 0 | 0 | 0 | 0 |
| 288296 | 2 | 0 | 0 | 0 | 0 |
| 289290 | 1 | 0 | 0 | 0 | 0 |
| 289291 | 2 | 0 | 0 | 0 | 0 |
| 291292 | 1 | 0 | 0 | 0 | 0 |
| 291293 | 1 | 0 | 0 | 0 | 0 |
| 293294 | 2 | 0 | 0 | 0 | 0 |
| 293298 | 1 | 0 | 0 | 0 | 0 |
| 294295 | 1 | 0 | 0 | 0 | 0 |
| 294296 | 1 | 0 | 0 | 0 | 0 |
| 296297 | 1 | 0 | 0 | 0 | 0 |
| 298299 | 1 | 0 | 0 | 0 | 0 |
| 298300 | 1 | 0 | 0 | 0 | 0 |
| 298304 | 1 | 0 | 0 | 0 | 0 |
| 299308 | 1 | 0 | 0 | 0 | 0 |
| 299315 | 2 | 0 | 0 | 0 | 0 |
| 300301 | 1 | 0 | 0 | 0 | 0 |
| 300302 | 1 | 0 | 0 | 0 | 0 |
| 300303 | 1 | 0 | 0 | 0 | 0 |
| 304305 | 1 | 0 | 0 | 0 | 0 |
| 304306 | 1 | 0 | 0 | 0 | 0 |
| 304307 | 1 | 0 | 0 | 0 | 0 |
| 308309 | 1 | 0 | 0 | 0 | 0 |
| 308310 | 2 | 0 | 0 | 0 | 0 |
| 310311 | 1 | 0 | 0 | 0 | 0 |
| 310312 | 1 | 0 | 0 | 0 | 0 |
| 312313 | 2 | 0 | 0 | 0 | 0 |
| 312317 | 1 | 0 | 0 | 0 | 0 |
| 313314 | 1 | 0 | 0 | 0 | 0 |
| 313315 | 1 | 0 | 0 | 0 | 0 |
| 315316 | 1 | 0 | 0 | 0 | 0 |
| 318319 | 1 | 0 | 0 | 0 | 0 |
| 318320 | 1 | 0 | 0 | 0 | 0 |
| 320321 | 1 | 0 | 0 | 0 | 0 |
| 320322 | 1 | 0 | 0 | 0 | 0 |
| 320323 | 1 | 0 | 0 | 0 | 0 |
| 323324 | 1 | 0 | 0 | 0 | 0 |
| 323325 | 1 | 0 | 0 | 0 | 0 |
| 323326 | 1 | 0 | 0 | 0 | 0 |
| 326327 | 1 | 0 | 0 | 0 | 0 |
| 326328 | 1 | 0 | 0 | 0 | 0 |
| 326329 | 1 | 0 | 0 | 0 | 0 |
| 329330 | 1 | 0 | 0 | 0 | 0 |
| 329331 | 1 | 0 | 0 | 0 | 0 |
| 329332 | 1 | 0 | 0 | 0 | 0 |
| 332333 | 1 | 0 | 0 | 0 | 0 |
| 332334 | 1 | 0 | 0 | 0 | 0 |
| 332335 | 1 | 0 | 0 | 0 | 0 |
| 335352 | 1 | 0 | 0 | 0 | 0 |
| 336337 | 1 | 0 | 0 | 0 | 0 |
| 336338 | 1 | 0 | 0 | 0 | 0 |
| 336339 | 1 | 0 | 0 | 0 | 0 |
| 336349 | 1 | 0 | 0 | 0 | 0 |
| 339340 | 1 | 0 | 0 | 0 | 0 |
| 340341 | 1 | 0 | 0 | 0 | 0 |

```

340348 2 0 0 0 0
341342 1 0 0 0 0
341343 1 0 0 0 0
341344 1 0 0 0 0
344345 1 0 0 0 0
344346 1 0 0 0 0
344347 1 0 0 0 0
349350 1 0 0 0 0
349351 1 0 0 0 0
349397 1 0 0 0 0
352353 1 0 0 0 0
352354 1 0 0 0 0
352355 1 0 0 0 0
355356 1 0 0 0 0
355357 1 0 0 0 0
355358 1 0 0 0 0
358359 1 0 0 0 0
358366 2 0 0 0 0
359360 1 0 0 0 0
360361 1 0 0 0 0
360362 1 0 0 0 0
360363 1 0 0 0 0
363364 1 0 0 0 0
363365 1 0 0 0 0
363367 1 0 0 0 0
367368 1 0 0 0 0
368369 1 0 0 0 0
368376 2 0 0 0 0
369370 1 0 0 0 0
369371 2 0 0 0 0
371372 1 0 0 0 0
371373 1 0 0 0 0
373374 2 0 0 0 0
373378 1 0 0 0 0
374375 1 0 0 0 0
374376 1 0 0 0 0
376377 1 0 0 0 0
378379 1 0 0 0 0
378380 1 0 0 0 0
378384 1 0 0 0 0
379388 1 0 0 0 0
379395 2 0 0 0 0
380381 1 0 0 0 0
380382 1 0 0 0 0
380383 1 0 0 0 0
384385 1 0 0 0 0
384386 1 0 0 0 0
384387 1 0 0 0 0
388389 1 0 0 0 0
388390 2 0 0 0 0
390391 1 0 0 0 0
390392 1 0 0 0 0
392393 2 0 0 0 0
392397 1 0 0 0 0
393394 1 0 0 0 0
393395 1 0 0 0 0
395396 1 0 0 0 0

```

```

M END
> <NAME>
D32_1

```

```

$$$$
D36_1
MOE2012 3D

```

```

412421 0 0 1 0 0 0 0 0 0999 V2000
-1.3000 -6.8250 -6.7500 O 0 0 0 0 0 0 0 0 0 0 0 0 0 0 0 0
-1.9720 -7.5020 -6.5640 H 0 0 0 0 0 0 0 0 0 0 0 0 0 0 0 0
-0.0440 -7.3690 -6.3650 C 0 0 0 0 0 0 0 0 0 0 0 0 0 0 0 0
-0.0850 -7.6170 -5.3000 H 0 0 0 0 0 0 0 0 0 0 0 0 0 0 0 0
0.1270 -8.2870 -6.9380 H 0 0 0 0 0 0 0 0 0 0 0 0 0 0 0 0
1.0500 -6.3460 -6.6430 C 0 0 0 0 0 0 0 0 0 0 0 0 0 0 0 0
1.0380 -6.0810 -7.7070 H 0 0 0 0 0 0 0 0 0 0 0 0 0 0 0 0
0.8240 -5.4180 -6.1010 H 0 0 0 0 0 0 0 0 0 0 0 0 0 0 0 0
2.4290 -6.8690 -6.2430 C 0 0 0 0 0 0 0 0 0 0 0 0 0 0 0 0
2.4280 -7.1250 -5.1760 H 0 0 0 0 0 0 0 0 0 0 0 0 0 0 0 0
2.6460 -7.7910 -6.7960 H 0 0 0 0 0 0 0 0 0 0 0 0 0 0 0 0
3.5250 -5.8360 -6.5200 C 0 0 0 0 0 0 0 0 0 0 0 0 0 0 0 0
3.5320 -5.5860 -7.5880 H 0 0 0 0 0 0 0 0 0 0 0 0 0 0 0 0
3.3050 -4.9120 -5.9730 H 0 0 0 0 0 0 0 0 0 0 0 0 0 0 0 0
4.9040 -6.3600 -6.1080 C 0 0 0 0 0 0 0 0 0 0 0 0 0 0 0 0

```













|    |     |   |   |   |   |   |
|----|-----|---|---|---|---|---|
| 9  | 10  | 1 | 0 | 0 | 0 | 0 |
| 9  | 11  | 1 | 0 | 0 | 0 | 0 |
| 9  | 12  | 1 | 0 | 0 | 0 | 0 |
| 12 | 13  | 1 | 0 | 0 | 0 | 0 |
| 12 | 14  | 1 | 0 | 0 | 0 | 0 |
| 12 | 15  | 1 | 0 | 0 | 0 | 0 |
| 15 | 16  | 1 | 0 | 0 | 0 | 0 |
| 15 | 17  | 1 | 0 | 0 | 0 | 0 |
| 15 | 18  | 1 | 0 | 0 | 0 | 0 |
| 18 | 19  | 1 | 0 | 0 | 0 | 0 |
| 18 | 20  | 1 | 0 | 0 | 0 | 0 |
| 18 | 21  | 1 | 0 | 0 | 0 | 0 |
| 21 | 22  | 1 | 0 | 0 | 0 | 0 |
| 21 | 38  | 1 | 0 | 0 | 0 | 0 |
| 23 | 24  | 1 | 0 | 0 | 0 | 0 |
| 23 | 25  | 1 | 0 | 0 | 0 | 0 |
| 23 | 26  | 1 | 0 | 0 | 0 | 0 |
| 23 | 35  | 1 | 0 | 0 | 0 | 0 |
| 26 | 27  | 1 | 0 | 0 | 0 | 0 |
| 27 | 28  | 1 | 0 | 0 | 0 | 0 |
| 27 | 34  | 2 | 0 | 0 | 0 | 0 |
| 28 | 29  | 1 | 0 | 0 | 0 | 0 |
| 28 | 30  | 1 | 0 | 0 | 0 | 0 |
| 28 | 31  | 1 | 0 | 0 | 0 | 0 |
| 31 | 32  | 1 | 0 | 0 | 0 | 0 |
| 31 | 33  | 1 | 0 | 0 | 0 | 0 |
| 31 | 104 | 1 | 0 | 0 | 0 | 0 |
| 35 | 36  | 1 | 0 | 0 | 0 | 0 |
| 35 | 37  | 1 | 0 | 0 | 0 | 0 |
| 35 | 83  | 1 | 0 | 0 | 0 | 0 |
| 38 | 39  | 1 | 0 | 0 | 0 | 0 |
| 38 | 40  | 1 | 0 | 0 | 0 | 0 |
| 38 | 41  | 1 | 0 | 0 | 0 | 0 |
| 41 | 42  | 1 | 0 | 0 | 0 | 0 |
| 41 | 43  | 1 | 0 | 0 | 0 | 0 |
| 41 | 44  | 1 | 0 | 0 | 0 | 0 |
| 44 | 45  | 1 | 0 | 0 | 0 | 0 |
| 44 | 52  | 2 | 0 | 0 | 0 | 0 |
| 45 | 46  | 1 | 0 | 0 | 0 | 0 |
| 46 | 47  | 1 | 0 | 0 | 0 | 0 |
| 46 | 48  | 1 | 0 | 0 | 0 | 0 |
| 46 | 49  | 1 | 0 | 0 | 0 | 0 |
| 49 | 50  | 1 | 0 | 0 | 0 | 0 |
| 49 | 51  | 1 | 0 | 0 | 0 | 0 |
| 49 | 53  | 1 | 0 | 0 | 0 | 0 |
| 53 | 54  | 1 | 0 | 0 | 0 | 0 |
| 54 | 55  | 1 | 0 | 0 | 0 | 0 |
| 54 | 62  | 2 | 0 | 0 | 0 | 0 |
| 55 | 56  | 1 | 0 | 0 | 0 | 0 |
| 55 | 57  | 2 | 0 | 0 | 0 | 0 |
| 57 | 58  | 1 | 0 | 0 | 0 | 0 |
| 57 | 59  | 1 | 0 | 0 | 0 | 0 |
| 59 | 60  | 2 | 0 | 0 | 0 | 0 |
| 59 | 64  | 1 | 0 | 0 | 0 | 0 |
| 60 | 61  | 1 | 0 | 0 | 0 | 0 |
| 60 | 62  | 1 | 0 | 0 | 0 | 0 |
| 62 | 63  | 1 | 0 | 0 | 0 | 0 |
| 64 | 65  | 1 | 0 | 0 | 0 | 0 |
| 64 | 66  | 1 | 0 | 0 | 0 | 0 |
| 64 | 70  | 1 | 0 | 0 | 0 | 0 |
| 65 | 74  | 1 | 0 | 0 | 0 | 0 |
| 65 | 81  | 2 | 0 | 0 | 0 | 0 |
| 66 | 67  | 1 | 0 | 0 | 0 | 0 |
| 66 | 68  | 1 | 0 | 0 | 0 | 0 |
| 66 | 69  | 1 | 0 | 0 | 0 | 0 |
| 70 | 71  | 1 | 0 | 0 | 0 | 0 |
| 70 | 72  | 1 | 0 | 0 | 0 | 0 |
| 70 | 73  | 1 | 0 | 0 | 0 | 0 |
| 74 | 75  | 1 | 0 | 0 | 0 | 0 |
| 74 | 76  | 2 | 0 | 0 | 0 | 0 |
| 76 | 77  | 1 | 0 | 0 | 0 | 0 |
| 76 | 78  | 1 | 0 | 0 | 0 | 0 |
| 78 | 79  | 2 | 0 | 0 | 0 | 0 |
| 78 | 83  | 1 | 0 | 0 | 0 | 0 |
| 79 | 80  | 1 | 0 | 0 | 0 | 0 |
| 79 | 81  | 1 | 0 | 0 | 0 | 0 |
| 81 | 82  | 1 | 0 | 0 | 0 | 0 |
| 84 | 85  | 1 | 0 | 0 | 0 | 0 |
| 84 | 86  | 1 | 0 | 0 | 0 | 0 |
| 86 | 87  | 1 | 0 | 0 | 0 | 0 |
| 86 | 88  | 1 | 0 | 0 | 0 | 0 |

|     |     |   |   |   |   |   |
|-----|-----|---|---|---|---|---|
| 86  | 89  | 1 | 0 | 0 | 0 | 0 |
| 89  | 90  | 1 | 0 | 0 | 0 | 0 |
| 89  | 91  | 1 | 0 | 0 | 0 | 0 |
| 89  | 92  | 1 | 0 | 0 | 0 | 0 |
| 92  | 93  | 1 | 0 | 0 | 0 | 0 |
| 92  | 94  | 1 | 0 | 0 | 0 | 0 |
| 92  | 95  | 1 | 0 | 0 | 0 | 0 |
| 95  | 96  | 1 | 0 | 0 | 0 | 0 |
| 95  | 97  | 1 | 0 | 0 | 0 | 0 |
| 95  | 98  | 1 | 0 | 0 | 0 | 0 |
| 98  | 99  | 1 | 0 | 0 | 0 | 0 |
| 98  | 100 | 1 | 0 | 0 | 0 | 0 |
| 98  | 101 | 1 | 0 | 0 | 0 | 0 |
| 101 | 102 | 1 | 0 | 0 | 0 | 0 |
| 101 | 103 | 1 | 0 | 0 | 0 | 0 |
| 101 | 104 | 1 | 0 | 0 | 0 | 0 |
| 104 | 120 | 1 | 0 | 0 | 0 | 0 |
| 105 | 106 | 1 | 0 | 0 | 0 | 0 |
| 105 | 107 | 1 | 0 | 0 | 0 | 0 |
| 105 | 108 | 1 | 0 | 0 | 0 | 0 |
| 105 | 117 | 1 | 0 | 0 | 0 | 0 |
| 108 | 109 | 1 | 0 | 0 | 0 | 0 |
| 109 | 110 | 1 | 0 | 0 | 0 | 0 |
| 109 | 116 | 2 | 0 | 0 | 0 | 0 |
| 110 | 111 | 1 | 0 | 0 | 0 | 0 |
| 110 | 112 | 1 | 0 | 0 | 0 | 0 |
| 110 | 113 | 1 | 0 | 0 | 0 | 0 |
| 113 | 114 | 1 | 0 | 0 | 0 | 0 |
| 113 | 115 | 1 | 0 | 0 | 0 | 0 |
| 113 | 186 | 1 | 0 | 0 | 0 | 0 |
| 117 | 118 | 1 | 0 | 0 | 0 | 0 |
| 117 | 119 | 1 | 0 | 0 | 0 | 0 |
| 117 | 165 | 1 | 0 | 0 | 0 | 0 |
| 120 | 121 | 1 | 0 | 0 | 0 | 0 |
| 120 | 122 | 1 | 0 | 0 | 0 | 0 |
| 120 | 123 | 1 | 0 | 0 | 0 | 0 |
| 123 | 124 | 1 | 0 | 0 | 0 | 0 |
| 123 | 125 | 1 | 0 | 0 | 0 | 0 |
| 123 | 126 | 1 | 0 | 0 | 0 | 0 |
| 126 | 127 | 1 | 0 | 0 | 0 | 0 |
| 126 | 134 | 2 | 0 | 0 | 0 | 0 |
| 127 | 128 | 1 | 0 | 0 | 0 | 0 |
| 128 | 129 | 1 | 0 | 0 | 0 | 0 |
| 128 | 130 | 1 | 0 | 0 | 0 | 0 |
| 128 | 131 | 1 | 0 | 0 | 0 | 0 |
| 131 | 132 | 1 | 0 | 0 | 0 | 0 |
| 131 | 133 | 1 | 0 | 0 | 0 | 0 |
| 131 | 135 | 1 | 0 | 0 | 0 | 0 |
| 135 | 136 | 1 | 0 | 0 | 0 | 0 |
| 136 | 137 | 1 | 0 | 0 | 0 | 0 |
| 136 | 144 | 2 | 0 | 0 | 0 | 0 |
| 137 | 138 | 1 | 0 | 0 | 0 | 0 |
| 137 | 139 | 2 | 0 | 0 | 0 | 0 |
| 139 | 140 | 1 | 0 | 0 | 0 | 0 |
| 139 | 141 | 1 | 0 | 0 | 0 | 0 |
| 141 | 142 | 2 | 0 | 0 | 0 | 0 |
| 141 | 146 | 1 | 0 | 0 | 0 | 0 |
| 142 | 143 | 1 | 0 | 0 | 0 | 0 |
| 142 | 144 | 1 | 0 | 0 | 0 | 0 |
| 144 | 145 | 1 | 0 | 0 | 0 | 0 |
| 146 | 147 | 1 | 0 | 0 | 0 | 0 |
| 146 | 148 | 1 | 0 | 0 | 0 | 0 |
| 146 | 152 | 1 | 0 | 0 | 0 | 0 |
| 147 | 156 | 1 | 0 | 0 | 0 | 0 |
| 147 | 163 | 2 | 0 | 0 | 0 | 0 |
| 148 | 149 | 1 | 0 | 0 | 0 | 0 |
| 148 | 150 | 1 | 0 | 0 | 0 | 0 |
| 148 | 151 | 1 | 0 | 0 | 0 | 0 |
| 152 | 153 | 1 | 0 | 0 | 0 | 0 |
| 152 | 154 | 1 | 0 | 0 | 0 | 0 |
| 152 | 155 | 1 | 0 | 0 | 0 | 0 |
| 156 | 157 | 1 | 0 | 0 | 0 | 0 |
| 156 | 158 | 2 | 0 | 0 | 0 | 0 |
| 158 | 159 | 1 | 0 | 0 | 0 | 0 |
| 158 | 160 | 1 | 0 | 0 | 0 | 0 |
| 160 | 161 | 2 | 0 | 0 | 0 | 0 |
| 160 | 165 | 1 | 0 | 0 | 0 | 0 |
| 161 | 162 | 1 | 0 | 0 | 0 | 0 |
| 161 | 163 | 1 | 0 | 0 | 0 | 0 |
| 163 | 164 | 1 | 0 | 0 | 0 | 0 |
| 166 | 167 | 1 | 0 | 0 | 0 | 0 |

|        |   |   |   |   |   |
|--------|---|---|---|---|---|
| 166168 | 1 | 0 | 0 | 0 | 0 |
| 168169 | 1 | 0 | 0 | 0 | 0 |
| 168170 | 1 | 0 | 0 | 0 | 0 |
| 168171 | 1 | 0 | 0 | 0 | 0 |
| 171172 | 1 | 0 | 0 | 0 | 0 |
| 171173 | 1 | 0 | 0 | 0 | 0 |
| 171174 | 1 | 0 | 0 | 0 | 0 |
| 174175 | 1 | 0 | 0 | 0 | 0 |
| 174176 | 1 | 0 | 0 | 0 | 0 |
| 174177 | 1 | 0 | 0 | 0 | 0 |
| 177178 | 1 | 0 | 0 | 0 | 0 |
| 177179 | 1 | 0 | 0 | 0 | 0 |
| 177180 | 1 | 0 | 0 | 0 | 0 |
| 180181 | 1 | 0 | 0 | 0 | 0 |
| 180182 | 1 | 0 | 0 | 0 | 0 |
| 180183 | 1 | 0 | 0 | 0 | 0 |
| 183184 | 1 | 0 | 0 | 0 | 0 |
| 183185 | 1 | 0 | 0 | 0 | 0 |
| 183186 | 1 | 0 | 0 | 0 | 0 |
| 186202 | 1 | 0 | 0 | 0 | 0 |
| 187188 | 1 | 0 | 0 | 0 | 0 |
| 187189 | 1 | 0 | 0 | 0 | 0 |
| 187190 | 1 | 0 | 0 | 0 | 0 |
| 187199 | 1 | 0 | 0 | 0 | 0 |
| 190191 | 1 | 0 | 0 | 0 | 0 |
| 191192 | 1 | 0 | 0 | 0 | 0 |
| 191198 | 2 | 0 | 0 | 0 | 0 |
| 192193 | 1 | 0 | 0 | 0 | 0 |
| 192194 | 1 | 0 | 0 | 0 | 0 |
| 192195 | 1 | 0 | 0 | 0 | 0 |
| 195196 | 1 | 0 | 0 | 0 | 0 |
| 195197 | 1 | 0 | 0 | 0 | 0 |
| 195268 | 1 | 0 | 0 | 0 | 0 |
| 199200 | 1 | 0 | 0 | 0 | 0 |
| 199201 | 1 | 0 | 0 | 0 | 0 |
| 199247 | 1 | 0 | 0 | 0 | 0 |
| 202203 | 1 | 0 | 0 | 0 | 0 |
| 202204 | 1 | 0 | 0 | 0 | 0 |
| 202205 | 1 | 0 | 0 | 0 | 0 |
| 205206 | 1 | 0 | 0 | 0 | 0 |
| 205207 | 1 | 0 | 0 | 0 | 0 |
| 205208 | 1 | 0 | 0 | 0 | 0 |
| 208209 | 1 | 0 | 0 | 0 | 0 |
| 208216 | 2 | 0 | 0 | 0 | 0 |
| 209210 | 1 | 0 | 0 | 0 | 0 |
| 210211 | 1 | 0 | 0 | 0 | 0 |
| 210212 | 1 | 0 | 0 | 0 | 0 |
| 210213 | 1 | 0 | 0 | 0 | 0 |
| 213214 | 1 | 0 | 0 | 0 | 0 |
| 213215 | 1 | 0 | 0 | 0 | 0 |
| 213217 | 1 | 0 | 0 | 0 | 0 |
| 217218 | 1 | 0 | 0 | 0 | 0 |
| 218219 | 1 | 0 | 0 | 0 | 0 |
| 218226 | 2 | 0 | 0 | 0 | 0 |
| 219220 | 1 | 0 | 0 | 0 | 0 |
| 219221 | 2 | 0 | 0 | 0 | 0 |
| 221222 | 1 | 0 | 0 | 0 | 0 |
| 221223 | 1 | 0 | 0 | 0 | 0 |
| 223224 | 2 | 0 | 0 | 0 | 0 |
| 223228 | 1 | 0 | 0 | 0 | 0 |
| 224225 | 1 | 0 | 0 | 0 | 0 |
| 224226 | 1 | 0 | 0 | 0 | 0 |
| 226227 | 1 | 0 | 0 | 0 | 0 |
| 228229 | 1 | 0 | 0 | 0 | 0 |
| 228230 | 1 | 0 | 0 | 0 | 0 |
| 228234 | 1 | 0 | 0 | 0 | 0 |
| 229238 | 1 | 0 | 0 | 0 | 0 |
| 229245 | 2 | 0 | 0 | 0 | 0 |
| 230231 | 1 | 0 | 0 | 0 | 0 |
| 230232 | 1 | 0 | 0 | 0 | 0 |
| 230233 | 1 | 0 | 0 | 0 | 0 |
| 234235 | 1 | 0 | 0 | 0 | 0 |
| 234236 | 1 | 0 | 0 | 0 | 0 |
| 234237 | 1 | 0 | 0 | 0 | 0 |
| 238239 | 1 | 0 | 0 | 0 | 0 |
| 238240 | 2 | 0 | 0 | 0 | 0 |
| 240241 | 1 | 0 | 0 | 0 | 0 |
| 240242 | 1 | 0 | 0 | 0 | 0 |
| 242243 | 2 | 0 | 0 | 0 | 0 |
| 242247 | 1 | 0 | 0 | 0 | 0 |
| 243244 | 1 | 0 | 0 | 0 | 0 |



|        |   |   |   |   |   |
|--------|---|---|---|---|---|
| 243245 | 1 | 0 | 0 | 0 | 0 |
| 245246 | 1 | 0 | 0 | 0 | 0 |
| 248249 | 1 | 0 | 0 | 0 | 0 |
| 248250 | 1 | 0 | 0 | 0 | 0 |
| 250251 | 1 | 0 | 0 | 0 | 0 |
| 250252 | 1 | 0 | 0 | 0 | 0 |
| 250253 | 1 | 0 | 0 | 0 | 0 |
| 253254 | 1 | 0 | 0 | 0 | 0 |
| 253255 | 1 | 0 | 0 | 0 | 0 |
| 253256 | 1 | 0 | 0 | 0 | 0 |
| 256257 | 1 | 0 | 0 | 0 | 0 |
| 256258 | 1 | 0 | 0 | 0 | 0 |
| 256259 | 1 | 0 | 0 | 0 | 0 |
| 259260 | 1 | 0 | 0 | 0 | 0 |
| 259261 | 1 | 0 | 0 | 0 | 0 |
| 259262 | 1 | 0 | 0 | 0 | 0 |
| 262263 | 1 | 0 | 0 | 0 | 0 |
| 262264 | 1 | 0 | 0 | 0 | 0 |
| 262265 | 1 | 0 | 0 | 0 | 0 |
| 265266 | 1 | 0 | 0 | 0 | 0 |
| 265267 | 1 | 0 | 0 | 0 | 0 |
| 265268 | 1 | 0 | 0 | 0 | 0 |
| 268284 | 1 | 0 | 0 | 0 | 0 |
| 269270 | 1 | 0 | 0 | 0 | 0 |
| 269271 | 1 | 0 | 0 | 0 | 0 |
| 269272 | 1 | 0 | 0 | 0 | 0 |
| 269281 | 1 | 0 | 0 | 0 | 0 |
| 272273 | 1 | 0 | 0 | 0 | 0 |
| 273274 | 1 | 0 | 0 | 0 | 0 |
| 273280 | 2 | 0 | 0 | 0 | 0 |
| 274275 | 1 | 0 | 0 | 0 | 0 |
| 274276 | 1 | 0 | 0 | 0 | 0 |
| 274277 | 1 | 0 | 0 | 0 | 0 |
| 277278 | 1 | 0 | 0 | 0 | 0 |
| 277279 | 1 | 0 | 0 | 0 | 0 |
| 277350 | 1 | 0 | 0 | 0 | 0 |
| 281282 | 1 | 0 | 0 | 0 | 0 |
| 281283 | 1 | 0 | 0 | 0 | 0 |
| 281329 | 1 | 0 | 0 | 0 | 0 |
| 284285 | 1 | 0 | 0 | 0 | 0 |
| 284286 | 1 | 0 | 0 | 0 | 0 |
| 284287 | 1 | 0 | 0 | 0 | 0 |
| 287288 | 1 | 0 | 0 | 0 | 0 |
| 287289 | 1 | 0 | 0 | 0 | 0 |
| 287290 | 1 | 0 | 0 | 0 | 0 |
| 290291 | 1 | 0 | 0 | 0 | 0 |
| 290298 | 2 | 0 | 0 | 0 | 0 |
| 291292 | 1 | 0 | 0 | 0 | 0 |
| 292293 | 1 | 0 | 0 | 0 | 0 |
| 292294 | 1 | 0 | 0 | 0 | 0 |
| 292295 | 1 | 0 | 0 | 0 | 0 |
| 295296 | 1 | 0 | 0 | 0 | 0 |
| 295297 | 1 | 0 | 0 | 0 | 0 |
| 295299 | 1 | 0 | 0 | 0 | 0 |
| 299300 | 1 | 0 | 0 | 0 | 0 |
| 300301 | 1 | 0 | 0 | 0 | 0 |
| 300308 | 2 | 0 | 0 | 0 | 0 |
| 301302 | 1 | 0 | 0 | 0 | 0 |
| 301303 | 2 | 0 | 0 | 0 | 0 |
| 303304 | 1 | 0 | 0 | 0 | 0 |
| 303305 | 1 | 0 | 0 | 0 | 0 |
| 305306 | 2 | 0 | 0 | 0 | 0 |
| 305310 | 1 | 0 | 0 | 0 | 0 |
| 306307 | 1 | 0 | 0 | 0 | 0 |
| 306308 | 1 | 0 | 0 | 0 | 0 |
| 308309 | 1 | 0 | 0 | 0 | 0 |
| 310311 | 1 | 0 | 0 | 0 | 0 |
| 310312 | 1 | 0 | 0 | 0 | 0 |
| 310316 | 1 | 0 | 0 | 0 | 0 |
| 311320 | 1 | 0 | 0 | 0 | 0 |
| 311327 | 2 | 0 | 0 | 0 | 0 |
| 312313 | 1 | 0 | 0 | 0 | 0 |
| 312314 | 1 | 0 | 0 | 0 | 0 |
| 312315 | 1 | 0 | 0 | 0 | 0 |
| 316317 | 1 | 0 | 0 | 0 | 0 |
| 316318 | 1 | 0 | 0 | 0 | 0 |
| 316319 | 1 | 0 | 0 | 0 | 0 |
| 320321 | 1 | 0 | 0 | 0 | 0 |
| 320322 | 2 | 0 | 0 | 0 | 0 |
| 322323 | 1 | 0 | 0 | 0 | 0 |
| 322324 | 1 | 0 | 0 | 0 | 0 |

|        |   |   |   |   |   |
|--------|---|---|---|---|---|
| 324325 | 2 | 0 | 0 | 0 | 0 |
| 324329 | 1 | 0 | 0 | 0 | 0 |
| 325326 | 1 | 0 | 0 | 0 | 0 |
| 325327 | 1 | 0 | 0 | 0 | 0 |
| 327328 | 1 | 0 | 0 | 0 | 0 |
| 330331 | 1 | 0 | 0 | 0 | 0 |
| 330332 | 1 | 0 | 0 | 0 | 0 |
| 332333 | 1 | 0 | 0 | 0 | 0 |
| 332334 | 1 | 0 | 0 | 0 | 0 |
| 332335 | 1 | 0 | 0 | 0 | 0 |
| 335336 | 1 | 0 | 0 | 0 | 0 |
| 335337 | 1 | 0 | 0 | 0 | 0 |
| 335338 | 1 | 0 | 0 | 0 | 0 |
| 338339 | 1 | 0 | 0 | 0 | 0 |
| 338340 | 1 | 0 | 0 | 0 | 0 |
| 338341 | 1 | 0 | 0 | 0 | 0 |
| 341342 | 1 | 0 | 0 | 0 | 0 |
| 341343 | 1 | 0 | 0 | 0 | 0 |
| 341344 | 1 | 0 | 0 | 0 | 0 |
| 344345 | 1 | 0 | 0 | 0 | 0 |
| 344346 | 1 | 0 | 0 | 0 | 0 |
| 344347 | 1 | 0 | 0 | 0 | 0 |
| 347348 | 1 | 0 | 0 | 0 | 0 |
| 347349 | 1 | 0 | 0 | 0 | 0 |
| 347350 | 1 | 0 | 0 | 0 | 0 |
| 350367 | 1 | 0 | 0 | 0 | 0 |
| 351352 | 1 | 0 | 0 | 0 | 0 |
| 351353 | 1 | 0 | 0 | 0 | 0 |
| 351354 | 1 | 0 | 0 | 0 | 0 |
| 351364 | 1 | 0 | 0 | 0 | 0 |
| 354355 | 1 | 0 | 0 | 0 | 0 |
| 355356 | 1 | 0 | 0 | 0 | 0 |
| 355363 | 2 | 0 | 0 | 0 | 0 |
| 356357 | 1 | 0 | 0 | 0 | 0 |
| 356358 | 1 | 0 | 0 | 0 | 0 |
| 356359 | 1 | 0 | 0 | 0 | 0 |
| 359360 | 1 | 0 | 0 | 0 | 0 |
| 359361 | 1 | 0 | 0 | 0 | 0 |
| 359362 | 1 | 0 | 0 | 0 | 0 |
| 364365 | 1 | 0 | 0 | 0 | 0 |
| 364366 | 1 | 0 | 0 | 0 | 0 |
| 364412 | 1 | 0 | 0 | 0 | 0 |
| 367368 | 1 | 0 | 0 | 0 | 0 |
| 367369 | 1 | 0 | 0 | 0 | 0 |
| 367370 | 1 | 0 | 0 | 0 | 0 |
| 370371 | 1 | 0 | 0 | 0 | 0 |
| 370372 | 1 | 0 | 0 | 0 | 0 |
| 370373 | 1 | 0 | 0 | 0 | 0 |
| 373374 | 1 | 0 | 0 | 0 | 0 |
| 373381 | 2 | 0 | 0 | 0 | 0 |
| 374375 | 1 | 0 | 0 | 0 | 0 |
| 375376 | 1 | 0 | 0 | 0 | 0 |
| 375377 | 1 | 0 | 0 | 0 | 0 |
| 375378 | 1 | 0 | 0 | 0 | 0 |
| 378379 | 1 | 0 | 0 | 0 | 0 |
| 378380 | 1 | 0 | 0 | 0 | 0 |
| 378382 | 1 | 0 | 0 | 0 | 0 |
| 382383 | 1 | 0 | 0 | 0 | 0 |
| 383384 | 1 | 0 | 0 | 0 | 0 |
| 383391 | 2 | 0 | 0 | 0 | 0 |
| 384385 | 1 | 0 | 0 | 0 | 0 |
| 384386 | 2 | 0 | 0 | 0 | 0 |
| 386387 | 1 | 0 | 0 | 0 | 0 |
| 386388 | 1 | 0 | 0 | 0 | 0 |
| 388389 | 2 | 0 | 0 | 0 | 0 |
| 388393 | 1 | 0 | 0 | 0 | 0 |
| 389390 | 1 | 0 | 0 | 0 | 0 |
| 389391 | 1 | 0 | 0 | 0 | 0 |
| 391392 | 1 | 0 | 0 | 0 | 0 |
| 393394 | 1 | 0 | 0 | 0 | 0 |
| 393395 | 1 | 0 | 0 | 0 | 0 |
| 393399 | 1 | 0 | 0 | 0 | 0 |
| 394403 | 1 | 0 | 0 | 0 | 0 |
| 394410 | 2 | 0 | 0 | 0 | 0 |
| 395396 | 1 | 0 | 0 | 0 | 0 |
| 395397 | 1 | 0 | 0 | 0 | 0 |
| 395398 | 1 | 0 | 0 | 0 | 0 |
| 399400 | 1 | 0 | 0 | 0 | 0 |
| 399401 | 1 | 0 | 0 | 0 | 0 |
| 399402 | 1 | 0 | 0 | 0 | 0 |
| 403404 | 1 | 0 | 0 | 0 | 0 |

403405 2 0 0 0 0  
405406 1 0 0 0 0  
405407 1 0 0 0 0  
407408 2 0 0 0 0  
407412 1 0 0 0 0  
408409 1 0 0 0 0  
408410 1 0 0 0 0  
410411 1 0 0 0 0

M END  
> <NAME>  
D36\_1

\$\$\$\$  
D60\_1  
MOE2012 3D

387396 0 0 1 0 0 0 0 0999 V2000  
25.9330 3.3340 -40.7090 C 0 0 0 0 0 0 0 0 0 0 0 0 0 0 0  
25.0260 3.7120 -40.2260 H 0 0 0 0 0 0 0 0 0 0 0 0 0 0 0  
25.6830 2.4410 -41.2920 H 0 0 0 0 0 0 0 0 0 0 0 0 0 0 0  
26.2840 4.0970 -41.4110 H 0 0 0 0 0 0 0 0 0 0 0 0 0 0 0  
26.9800 3.0520 -39.7360 N 0 0 3 0 0 0 0 0 0 0 0 0 0 0 0  
27.2050 3.9140 -39.2370 H 0 0 0 0 0 0 0 0 0 0 0 0 0 0 0  
26.5390 2.0330 -38.7750 C 0 0 0 0 0 0 0 0 0 0 0 0 0 0 0  
25.6860 2.4150 -38.2040 H 0 0 0 0 0 0 0 0 0 0 0 0 0 0 0  
26.2140 1.1330 -39.3110 H 0 0 0 0 0 0 0 0 0 0 0 0 0 0 0  
27.6990 1.6580 -37.8330 C 0 0 0 0 0 0 0 0 0 0 0 0 0 0 0  
28.5350 1.3450 -38.4700 H 0 0 0 0 0 0 0 0 0 0 0 0 0 0 0  
28.0520 2.5420 -37.2840 H 0 0 0 0 0 0 0 0 0 0 0 0 0 0 0  
27.3350 0.5710 -36.8980 N 0 0 3 0 0 0 0 0 0 0 0 0 0 0 0  
26.5450 1.0960 -35.7780 C 0 0 0 0 0 0 0 0 0 0 0 0 0 0 0  
25.6210 1.5670 -36.1280 H 0 0 0 0 0 0 0 0 0 0 0 0 0 0 0  
27.1060 1.8290 -35.1870 H 0 0 0 0 0 0 0 0 0 0 0 0 0 0 0  
26.2360 0.2820 -35.1130 H 0 0 0 0 0 0 0 0 0 0 0 0 0 0 0  
44.5850 -3.4220 -34.0880 C 0 0 0 0 0 0 0 0 0 0 0 0 0 0 0  
44.0300 -4.0700 -34.7740 H 0 0 0 0 0 0 0 0 0 0 0 0 0 0 0  
44.1830 -3.6350 -33.0900 H 0 0 0 0 0 0 0 0 0 0 0 0 0 0 0  
45.9700 -3.7900 -34.1850 O 0 0 0 0 0 0 0 0 0 0 0 0 0 0 0  
46.7420 -3.5150 -33.0960 C 0 0 0 0 0 0 0 0 0 0 0 0 0 0 0  
48.1560 -3.9720 -33.3520 C 0 0 0 0 0 0 0 0 0 0 0 0 0 0 0  
48.1960 -5.0340 -33.0840 H 0 0 0 0 0 0 0 0 0 0 0 0 0 0 0  
48.3940 -3.8880 -34.4190 H 0 0 0 0 0 0 0 0 0 0 0 0 0 0 0  
49.1760 -3.1960 -32.5150 C 0 0 0 0 0 0 0 0 0 0 0 0 0 0 0  
48.7670 -2.9700 -31.5240 H 0 0 0 0 0 0 0 0 0 0 0 0 0 0 0  
50.0220 -3.8780 -32.3540 H 0 0 0 0 0 0 0 0 0 0 0 0 0 0 0  
46.3420 -2.9940 -32.0640 O 0 0 0 0 0 0 0 0 0 0 0 0 0 0 0  
44.3890 -1.9560 -34.4640 C 0 0 0 0 0 0 0 0 0 0 0 0 0 0 0  
44.9100 -1.3280 -33.7320 H 0 0 0 0 0 0 0 0 0 0 0 0 0 0 0  
44.8570 -1.7070 -35.4230 H 0 0 0 0 0 0 0 0 0 0 0 0 0 0 0  
28.5390 -0.1100 -36.3840 C 0 0 0 0 0 0 0 0 0 0 0 0 0 0 0  
29.3110 0.6190 -36.1000 H 0 0 0 0 0 0 0 0 0 0 0 0 0 0 0  
28.2930 -0.6670 -35.4700 H 0 0 0 0 0 0 0 0 0 0 0 0 0 0 0  
29.0740 -1.1250 -37.3970 C 0 0 0 0 0 0 0 0 0 0 0 0 0 0 0  
28.3270 -1.9100 -37.5630 H 0 0 0 0 0 0 0 0 0 0 0 0 0 0 0  
29.3090 -0.6510 -38.3550 H 0 0 0 0 0 0 0 0 0 0 0 0 0 0 0  
30.3390 -1.7710 -36.8970 C 0 0 0 0 0 0 0 0 0 0 0 0 0 0 0  
30.7580 -2.7010 -37.8020 O 0 0 0 0 0 0 0 0 0 0 0 0 0 0 0  
31.9790 -3.3830 -37.4820 C 0 0 0 0 0 0 0 0 0 0 0 0 0 0 0  
32.0200 -3.6500 -36.4190 H 0 0 0 0 0 0 0 0 0 0 0 0 0 0 0  
31.9750 -4.3330 -38.0280 H 0 0 0 0 0 0 0 0 0 0 0 0 0 0 0  
33.1870 -2.5530 -37.9000 C 0 0 0 0 0 0 0 0 0 0 0 0 0 0 0  
33.1030 -2.3120 -38.9670 H 0 0 0 0 0 0 0 0 0 0 0 0 0 0 0  
33.2090 -1.6170 -37.3280 H 0 0 0 0 0 0 0 0 0 0 0 0 0 0 0  
30.9190 -1.4860 -35.8590 O 0 0 0 0 0 0 0 0 0 0 0 0 0 0 0  
34.3620 -3.3190 -37.6450 O 0 0 0 0 0 0 0 0 0 0 0 0 0 0 0  
35.5590 -2.7610 -38.0000 C 0 0 0 0 0 0 0 0 0 0 0 0 0 0 0  
36.6700 -3.5760 -37.7890 C 0 0 0 0 0 0 0 0 0 0 0 0 0 0 0  
36.5380 -4.5710 -37.3710 H 0 0 0 0 0 0 0 0 0 0 0 0 0 0 0  
37.9530 -3.1290 -38.1140 C 0 0 0 0 0 0 0 0 0 0 0 0 0 0 0  
38.7940 -3.7960 -37.9350 H 0 0 0 0 0 0 0 0 0 0 0 0 0 0 0  
38.1640 -1.8470 -38.6580 C 0 0 0 0 0 0 0 0 0 0 0 0 0 0 0  
37.0340 -1.0380 -38.8610 C 0 0 0 0 0 0 0 0 0 0 0 0 0 0 0  
37.1210 -0.0400 -39.2820 H 0 0 0 0 0 0 0 0 0 0 0 0 0 0 0  
35.7470 -1.4880 -38.5350 C 0 0 0 0 0 0 0 0 0 0 0 0 0 0 0  
34.9160 -0.8140 -38.7150 H 0 0 0 0 0 0 0 0 0 0 0 0 0 0 0  
39.5980 -1.3950 -39.0220 C 0 0 0 0 0 0 0 0 0 0 0 0 0 0 0  
40.5480 -1.5110 -37.8060 C 0 0 0 0 0 0 0 0 0 0 0 0 0 0 0  
40.0320 -2.2580 -40.2370 C 0 0 0 0 0 0 0 0 0 0 0 0 0 0 0  
40.1100 -3.3220 -39.9860 H 0 0 0 0 0 0 0 0 0 0 0 0 0 0 0  
41.0050 -1.9410 -40.6320 H 0 0 0 0 0 0 0 0 0 0 0 0 0 0 0  
39.3110 -2.1730 -41.0600 H 0 0 0 0 0 0 0 0 0 0 0 0 0 0 0









|    |    |   |   |   |   |   |
|----|----|---|---|---|---|---|
| 1  | 3  | 1 | 0 | 0 | 0 | 0 |
| 1  | 4  | 1 | 0 | 0 | 0 | 0 |
| 1  | 5  | 1 | 0 | 0 | 0 | 0 |
| 5  | 6  | 1 | 0 | 0 | 0 | 0 |
| 5  | 7  | 1 | 0 | 0 | 0 | 0 |
| 7  | 8  | 1 | 0 | 0 | 0 | 0 |
| 7  | 9  | 1 | 0 | 0 | 0 | 0 |
| 7  | 10 | 1 | 0 | 0 | 0 | 0 |
| 10 | 11 | 1 | 0 | 0 | 0 | 0 |
| 10 | 12 | 1 | 0 | 0 | 0 | 0 |
| 10 | 13 | 1 | 0 | 0 | 0 | 0 |
| 13 | 14 | 1 | 0 | 0 | 0 | 0 |
| 13 | 33 | 1 | 0 | 0 | 0 | 0 |
| 14 | 15 | 1 | 0 | 0 | 0 | 0 |
| 14 | 16 | 1 | 0 | 0 | 0 | 0 |
| 14 | 17 | 1 | 0 | 0 | 0 | 0 |
| 18 | 19 | 1 | 0 | 0 | 0 | 0 |
| 18 | 20 | 1 | 0 | 0 | 0 | 0 |
| 18 | 21 | 1 | 0 | 0 | 0 | 0 |
| 18 | 30 | 1 | 0 | 0 | 0 | 0 |
| 21 | 22 | 1 | 0 | 0 | 0 | 0 |
| 22 | 23 | 1 | 0 | 0 | 0 | 0 |
| 22 | 29 | 2 | 0 | 0 | 0 | 0 |
| 23 | 24 | 1 | 0 | 0 | 0 | 0 |
| 23 | 25 | 1 | 0 | 0 | 0 | 0 |
| 23 | 26 | 1 | 0 | 0 | 0 | 0 |
| 26 | 27 | 1 | 0 | 0 | 0 | 0 |
| 26 | 28 | 1 | 0 | 0 | 0 | 0 |
| 26 | 83 | 1 | 0 | 0 | 0 | 0 |
| 30 | 31 | 1 | 0 | 0 | 0 | 0 |
| 30 | 32 | 1 | 0 | 0 | 0 | 0 |
| 30 | 78 | 1 | 0 | 0 | 0 | 0 |
| 33 | 34 | 1 | 0 | 0 | 0 | 0 |
| 33 | 35 | 1 | 0 | 0 | 0 | 0 |
| 33 | 36 | 1 | 0 | 0 | 0 | 0 |
| 36 | 37 | 1 | 0 | 0 | 0 | 0 |
| 36 | 38 | 1 | 0 | 0 | 0 | 0 |
| 36 | 39 | 1 | 0 | 0 | 0 | 0 |
| 39 | 40 | 1 | 0 | 0 | 0 | 0 |
| 39 | 47 | 2 | 0 | 0 | 0 | 0 |
| 40 | 41 | 1 | 0 | 0 | 0 | 0 |
| 41 | 42 | 1 | 0 | 0 | 0 | 0 |
| 41 | 43 | 1 | 0 | 0 | 0 | 0 |
| 41 | 44 | 1 | 0 | 0 | 0 | 0 |
| 44 | 45 | 1 | 0 | 0 | 0 | 0 |
| 44 | 46 | 1 | 0 | 0 | 0 | 0 |
| 44 | 48 | 1 | 0 | 0 | 0 | 0 |
| 48 | 49 | 1 | 0 | 0 | 0 | 0 |
| 49 | 50 | 1 | 0 | 0 | 0 | 0 |
| 49 | 57 | 2 | 0 | 0 | 0 | 0 |
| 50 | 51 | 1 | 0 | 0 | 0 | 0 |
| 50 | 52 | 2 | 0 | 0 | 0 | 0 |
| 52 | 53 | 1 | 0 | 0 | 0 | 0 |
| 52 | 54 | 1 | 0 | 0 | 0 | 0 |
| 54 | 55 | 2 | 0 | 0 | 0 | 0 |
| 54 | 59 | 1 | 0 | 0 | 0 | 0 |
| 55 | 56 | 1 | 0 | 0 | 0 | 0 |
| 55 | 57 | 1 | 0 | 0 | 0 | 0 |
| 57 | 58 | 1 | 0 | 0 | 0 | 0 |
| 59 | 60 | 1 | 0 | 0 | 0 | 0 |
| 59 | 61 | 1 | 0 | 0 | 0 | 0 |
| 59 | 65 | 1 | 0 | 0 | 0 | 0 |
| 60 | 69 | 1 | 0 | 0 | 0 | 0 |
| 60 | 76 | 2 | 0 | 0 | 0 | 0 |
| 61 | 62 | 1 | 0 | 0 | 0 | 0 |
| 61 | 63 | 1 | 0 | 0 | 0 | 0 |
| 61 | 64 | 1 | 0 | 0 | 0 | 0 |
| 65 | 66 | 1 | 0 | 0 | 0 | 0 |
| 65 | 67 | 1 | 0 | 0 | 0 | 0 |
| 65 | 68 | 1 | 0 | 0 | 0 | 0 |
| 69 | 70 | 1 | 0 | 0 | 0 | 0 |
| 69 | 71 | 2 | 0 | 0 | 0 | 0 |
| 71 | 72 | 1 | 0 | 0 | 0 | 0 |
| 71 | 73 | 1 | 0 | 0 | 0 | 0 |
| 73 | 74 | 2 | 0 | 0 | 0 | 0 |
| 73 | 78 | 1 | 0 | 0 | 0 | 0 |
| 74 | 75 | 1 | 0 | 0 | 0 | 0 |
| 74 | 76 | 1 | 0 | 0 | 0 | 0 |
| 76 | 77 | 1 | 0 | 0 | 0 | 0 |
| 79 | 80 | 1 | 0 | 0 | 0 | 0 |
| 79 | 81 | 1 | 0 | 0 | 0 | 0 |



|     |     |   |   |   |   |   |
|-----|-----|---|---|---|---|---|
| 79  | 82  | 1 | 0 | 0 | 0 | 0 |
| 79  | 83  | 1 | 0 | 0 | 0 | 0 |
| 83  | 84  | 1 | 0 | 0 | 0 | 0 |
| 84  | 85  | 1 | 0 | 0 | 0 | 0 |
| 84  | 86  | 1 | 0 | 0 | 0 | 0 |
| 84  | 87  | 1 | 0 | 0 | 0 | 0 |
| 87  | 88  | 1 | 0 | 0 | 0 | 0 |
| 87  | 89  | 1 | 0 | 0 | 0 | 0 |
| 87  | 90  | 1 | 0 | 0 | 0 | 0 |
| 90  | 91  | 1 | 0 | 0 | 0 | 0 |
| 90  | 110 | 1 | 0 | 0 | 0 | 0 |
| 91  | 92  | 1 | 0 | 0 | 0 | 0 |
| 91  | 93  | 1 | 0 | 0 | 0 | 0 |
| 91  | 94  | 1 | 0 | 0 | 0 | 0 |
| 95  | 96  | 1 | 0 | 0 | 0 | 0 |
| 95  | 97  | 1 | 0 | 0 | 0 | 0 |
| 95  | 98  | 1 | 0 | 0 | 0 | 0 |
| 95  | 107 | 1 | 0 | 0 | 0 | 0 |
| 98  | 99  | 1 | 0 | 0 | 0 | 0 |
| 99  | 100 | 1 | 0 | 0 | 0 | 0 |
| 99  | 106 | 2 | 0 | 0 | 0 | 0 |
| 100 | 101 | 1 | 0 | 0 | 0 | 0 |
| 100 | 102 | 1 | 0 | 0 | 0 | 0 |
| 100 | 103 | 1 | 0 | 0 | 0 | 0 |
| 103 | 104 | 1 | 0 | 0 | 0 | 0 |
| 103 | 105 | 1 | 0 | 0 | 0 | 0 |
| 103 | 160 | 1 | 0 | 0 | 0 | 0 |
| 107 | 108 | 1 | 0 | 0 | 0 | 0 |
| 107 | 109 | 1 | 0 | 0 | 0 | 0 |
| 107 | 155 | 1 | 0 | 0 | 0 | 0 |
| 110 | 111 | 1 | 0 | 0 | 0 | 0 |
| 110 | 112 | 1 | 0 | 0 | 0 | 0 |
| 110 | 113 | 1 | 0 | 0 | 0 | 0 |
| 113 | 114 | 1 | 0 | 0 | 0 | 0 |
| 113 | 115 | 1 | 0 | 0 | 0 | 0 |
| 113 | 116 | 1 | 0 | 0 | 0 | 0 |
| 116 | 117 | 1 | 0 | 0 | 0 | 0 |
| 116 | 124 | 2 | 0 | 0 | 0 | 0 |
| 117 | 118 | 1 | 0 | 0 | 0 | 0 |
| 118 | 119 | 1 | 0 | 0 | 0 | 0 |
| 118 | 120 | 1 | 0 | 0 | 0 | 0 |
| 118 | 121 | 1 | 0 | 0 | 0 | 0 |
| 121 | 122 | 1 | 0 | 0 | 0 | 0 |
| 121 | 123 | 1 | 0 | 0 | 0 | 0 |
| 121 | 125 | 1 | 0 | 0 | 0 | 0 |
| 125 | 126 | 1 | 0 | 0 | 0 | 0 |
| 126 | 127 | 1 | 0 | 0 | 0 | 0 |
| 126 | 134 | 2 | 0 | 0 | 0 | 0 |
| 127 | 128 | 1 | 0 | 0 | 0 | 0 |
| 127 | 129 | 2 | 0 | 0 | 0 | 0 |
| 129 | 130 | 1 | 0 | 0 | 0 | 0 |
| 129 | 131 | 1 | 0 | 0 | 0 | 0 |
| 131 | 132 | 2 | 0 | 0 | 0 | 0 |
| 131 | 136 | 1 | 0 | 0 | 0 | 0 |
| 132 | 133 | 1 | 0 | 0 | 0 | 0 |
| 132 | 134 | 1 | 0 | 0 | 0 | 0 |
| 134 | 135 | 1 | 0 | 0 | 0 | 0 |
| 136 | 137 | 1 | 0 | 0 | 0 | 0 |
| 136 | 138 | 1 | 0 | 0 | 0 | 0 |
| 136 | 142 | 1 | 0 | 0 | 0 | 0 |
| 137 | 146 | 1 | 0 | 0 | 0 | 0 |
| 137 | 153 | 2 | 0 | 0 | 0 | 0 |
| 138 | 139 | 1 | 0 | 0 | 0 | 0 |
| 138 | 140 | 1 | 0 | 0 | 0 | 0 |
| 138 | 141 | 1 | 0 | 0 | 0 | 0 |
| 142 | 143 | 1 | 0 | 0 | 0 | 0 |
| 142 | 144 | 1 | 0 | 0 | 0 | 0 |
| 142 | 145 | 1 | 0 | 0 | 0 | 0 |
| 146 | 147 | 1 | 0 | 0 | 0 | 0 |
| 146 | 148 | 2 | 0 | 0 | 0 | 0 |
| 148 | 149 | 1 | 0 | 0 | 0 | 0 |
| 148 | 150 | 1 | 0 | 0 | 0 | 0 |
| 150 | 151 | 2 | 0 | 0 | 0 | 0 |
| 150 | 155 | 1 | 0 | 0 | 0 | 0 |
| 151 | 152 | 1 | 0 | 0 | 0 | 0 |
| 151 | 153 | 1 | 0 | 0 | 0 | 0 |
| 153 | 154 | 1 | 0 | 0 | 0 | 0 |
| 156 | 157 | 1 | 0 | 0 | 0 | 0 |
| 156 | 158 | 1 | 0 | 0 | 0 | 0 |
| 156 | 159 | 1 | 0 | 0 | 0 | 0 |
| 156 | 160 | 1 | 0 | 0 | 0 | 0 |

|        |   |   |   |   |   |
|--------|---|---|---|---|---|
| 160161 | 1 | 0 | 0 | 0 | 0 |
| 161162 | 1 | 0 | 0 | 0 | 0 |
| 161163 | 1 | 0 | 0 | 0 | 0 |
| 161164 | 1 | 0 | 0 | 0 | 0 |
| 164165 | 1 | 0 | 0 | 0 | 0 |
| 164166 | 1 | 0 | 0 | 0 | 0 |
| 164167 | 1 | 0 | 0 | 0 | 0 |
| 167168 | 1 | 0 | 0 | 0 | 0 |
| 167187 | 1 | 0 | 0 | 0 | 0 |
| 168169 | 1 | 0 | 0 | 0 | 0 |
| 168170 | 1 | 0 | 0 | 0 | 0 |
| 168171 | 1 | 0 | 0 | 0 | 0 |
| 172173 | 1 | 0 | 0 | 0 | 0 |
| 172174 | 1 | 0 | 0 | 0 | 0 |
| 172175 | 1 | 0 | 0 | 0 | 0 |
| 172184 | 1 | 0 | 0 | 0 | 0 |
| 175176 | 1 | 0 | 0 | 0 | 0 |
| 176177 | 1 | 0 | 0 | 0 | 0 |
| 176183 | 2 | 0 | 0 | 0 | 0 |
| 177178 | 1 | 0 | 0 | 0 | 0 |
| 177179 | 1 | 0 | 0 | 0 | 0 |
| 177180 | 1 | 0 | 0 | 0 | 0 |
| 180181 | 1 | 0 | 0 | 0 | 0 |
| 180182 | 1 | 0 | 0 | 0 | 0 |
| 180237 | 1 | 0 | 0 | 0 | 0 |
| 184185 | 1 | 0 | 0 | 0 | 0 |
| 184186 | 1 | 0 | 0 | 0 | 0 |
| 184232 | 1 | 0 | 0 | 0 | 0 |
| 187188 | 1 | 0 | 0 | 0 | 0 |
| 187189 | 1 | 0 | 0 | 0 | 0 |
| 187190 | 1 | 0 | 0 | 0 | 0 |
| 190191 | 1 | 0 | 0 | 0 | 0 |
| 190192 | 1 | 0 | 0 | 0 | 0 |
| 190193 | 1 | 0 | 0 | 0 | 0 |
| 193194 | 1 | 0 | 0 | 0 | 0 |
| 193201 | 2 | 0 | 0 | 0 | 0 |
| 194195 | 1 | 0 | 0 | 0 | 0 |
| 195196 | 1 | 0 | 0 | 0 | 0 |
| 195197 | 1 | 0 | 0 | 0 | 0 |
| 195198 | 1 | 0 | 0 | 0 | 0 |
| 198199 | 1 | 0 | 0 | 0 | 0 |
| 198200 | 1 | 0 | 0 | 0 | 0 |
| 198202 | 1 | 0 | 0 | 0 | 0 |
| 202203 | 1 | 0 | 0 | 0 | 0 |
| 203204 | 1 | 0 | 0 | 0 | 0 |
| 203211 | 2 | 0 | 0 | 0 | 0 |
| 204205 | 1 | 0 | 0 | 0 | 0 |
| 204206 | 2 | 0 | 0 | 0 | 0 |
| 206207 | 1 | 0 | 0 | 0 | 0 |
| 206208 | 1 | 0 | 0 | 0 | 0 |
| 208209 | 2 | 0 | 0 | 0 | 0 |
| 208213 | 1 | 0 | 0 | 0 | 0 |
| 209210 | 1 | 0 | 0 | 0 | 0 |
| 209211 | 1 | 0 | 0 | 0 | 0 |
| 211212 | 1 | 0 | 0 | 0 | 0 |
| 213214 | 1 | 0 | 0 | 0 | 0 |
| 213215 | 1 | 0 | 0 | 0 | 0 |
| 213219 | 1 | 0 | 0 | 0 | 0 |
| 214223 | 1 | 0 | 0 | 0 | 0 |
| 214230 | 2 | 0 | 0 | 0 | 0 |
| 215216 | 1 | 0 | 0 | 0 | 0 |
| 215217 | 1 | 0 | 0 | 0 | 0 |
| 215218 | 1 | 0 | 0 | 0 | 0 |
| 219220 | 1 | 0 | 0 | 0 | 0 |
| 219221 | 1 | 0 | 0 | 0 | 0 |
| 219222 | 1 | 0 | 0 | 0 | 0 |
| 223224 | 1 | 0 | 0 | 0 | 0 |
| 223225 | 2 | 0 | 0 | 0 | 0 |
| 225226 | 1 | 0 | 0 | 0 | 0 |
| 225227 | 1 | 0 | 0 | 0 | 0 |
| 227228 | 2 | 0 | 0 | 0 | 0 |
| 227232 | 1 | 0 | 0 | 0 | 0 |
| 228229 | 1 | 0 | 0 | 0 | 0 |
| 228230 | 1 | 0 | 0 | 0 | 0 |
| 230231 | 1 | 0 | 0 | 0 | 0 |
| 233234 | 1 | 0 | 0 | 0 | 0 |
| 233235 | 1 | 0 | 0 | 0 | 0 |
| 233236 | 1 | 0 | 0 | 0 | 0 |
| 233237 | 1 | 0 | 0 | 0 | 0 |
| 237238 | 1 | 0 | 0 | 0 | 0 |
| 238239 | 1 | 0 | 0 | 0 | 0 |

|        |   |   |   |   |   |
|--------|---|---|---|---|---|
| 238240 | 1 | 0 | 0 | 0 | 0 |
| 238241 | 1 | 0 | 0 | 0 | 0 |
| 241242 | 1 | 0 | 0 | 0 | 0 |
| 241243 | 1 | 0 | 0 | 0 | 0 |
| 241244 | 1 | 0 | 0 | 0 | 0 |
| 244245 | 1 | 0 | 0 | 0 | 0 |
| 244264 | 1 | 0 | 0 | 0 | 0 |
| 245246 | 1 | 0 | 0 | 0 | 0 |
| 245247 | 1 | 0 | 0 | 0 | 0 |
| 245248 | 1 | 0 | 0 | 0 | 0 |
| 249250 | 1 | 0 | 0 | 0 | 0 |
| 249251 | 1 | 0 | 0 | 0 | 0 |
| 249252 | 1 | 0 | 0 | 0 | 0 |
| 249261 | 1 | 0 | 0 | 0 | 0 |
| 252253 | 1 | 0 | 0 | 0 | 0 |
| 253254 | 1 | 0 | 0 | 0 | 0 |
| 253260 | 2 | 0 | 0 | 0 | 0 |
| 254255 | 1 | 0 | 0 | 0 | 0 |
| 254256 | 1 | 0 | 0 | 0 | 0 |
| 254257 | 1 | 0 | 0 | 0 | 0 |
| 257258 | 1 | 0 | 0 | 0 | 0 |
| 257259 | 1 | 0 | 0 | 0 | 0 |
| 257314 | 1 | 0 | 0 | 0 | 0 |
| 261262 | 1 | 0 | 0 | 0 | 0 |
| 261263 | 1 | 0 | 0 | 0 | 0 |
| 261309 | 1 | 0 | 0 | 0 | 0 |
| 264265 | 1 | 0 | 0 | 0 | 0 |
| 264266 | 1 | 0 | 0 | 0 | 0 |
| 264267 | 1 | 0 | 0 | 0 | 0 |
| 267268 | 1 | 0 | 0 | 0 | 0 |
| 267269 | 1 | 0 | 0 | 0 | 0 |
| 267270 | 1 | 0 | 0 | 0 | 0 |
| 270271 | 1 | 0 | 0 | 0 | 0 |
| 270278 | 2 | 0 | 0 | 0 | 0 |
| 271272 | 1 | 0 | 0 | 0 | 0 |
| 272273 | 1 | 0 | 0 | 0 | 0 |
| 272274 | 1 | 0 | 0 | 0 | 0 |
| 272275 | 1 | 0 | 0 | 0 | 0 |
| 275276 | 1 | 0 | 0 | 0 | 0 |
| 275277 | 1 | 0 | 0 | 0 | 0 |
| 275279 | 1 | 0 | 0 | 0 | 0 |
| 279280 | 1 | 0 | 0 | 0 | 0 |
| 280281 | 1 | 0 | 0 | 0 | 0 |
| 280288 | 2 | 0 | 0 | 0 | 0 |
| 281282 | 1 | 0 | 0 | 0 | 0 |
| 281283 | 2 | 0 | 0 | 0 | 0 |
| 283284 | 1 | 0 | 0 | 0 | 0 |
| 283285 | 1 | 0 | 0 | 0 | 0 |
| 285286 | 2 | 0 | 0 | 0 | 0 |
| 285290 | 1 | 0 | 0 | 0 | 0 |
| 286287 | 1 | 0 | 0 | 0 | 0 |
| 286288 | 1 | 0 | 0 | 0 | 0 |
| 288289 | 1 | 0 | 0 | 0 | 0 |
| 290291 | 1 | 0 | 0 | 0 | 0 |
| 290292 | 1 | 0 | 0 | 0 | 0 |
| 290296 | 1 | 0 | 0 | 0 | 0 |
| 291300 | 1 | 0 | 0 | 0 | 0 |
| 291307 | 2 | 0 | 0 | 0 | 0 |
| 292293 | 1 | 0 | 0 | 0 | 0 |
| 292294 | 1 | 0 | 0 | 0 | 0 |
| 292295 | 1 | 0 | 0 | 0 | 0 |
| 296297 | 1 | 0 | 0 | 0 | 0 |
| 296298 | 1 | 0 | 0 | 0 | 0 |
| 296299 | 1 | 0 | 0 | 0 | 0 |
| 300301 | 1 | 0 | 0 | 0 | 0 |
| 300302 | 2 | 0 | 0 | 0 | 0 |
| 302303 | 1 | 0 | 0 | 0 | 0 |
| 302304 | 1 | 0 | 0 | 0 | 0 |
| 304305 | 2 | 0 | 0 | 0 | 0 |
| 304309 | 1 | 0 | 0 | 0 | 0 |
| 305306 | 1 | 0 | 0 | 0 | 0 |
| 305307 | 1 | 0 | 0 | 0 | 0 |
| 307308 | 1 | 0 | 0 | 0 | 0 |
| 310311 | 1 | 0 | 0 | 0 | 0 |
| 310312 | 1 | 0 | 0 | 0 | 0 |
| 310313 | 1 | 0 | 0 | 0 | 0 |
| 310314 | 1 | 0 | 0 | 0 | 0 |
| 314315 | 1 | 0 | 0 | 0 | 0 |
| 315316 | 1 | 0 | 0 | 0 | 0 |
| 315317 | 1 | 0 | 0 | 0 | 0 |
| 315318 | 1 | 0 | 0 | 0 | 0 |

318319 1 0 0 0 0  
318320 1 0 0 0 0  
318321 1 0 0 0 0  
321322 1 0 0 0 0  
321342 1 0 0 0 0  
322323 1 0 0 0 0  
322324 1 0 0 0 0  
322325 1 0 0 0 0  
326327 1 0 0 0 0  
326328 1 0 0 0 0  
326329 1 0 0 0 0  
326339 1 0 0 0 0  
329330 1 0 0 0 0  
330331 1 0 0 0 0  
330338 2 0 0 0 0  
331332 1 0 0 0 0  
331333 1 0 0 0 0  
331334 1 0 0 0 0  
334335 1 0 0 0 0  
334336 1 0 0 0 0  
334337 1 0 0 0 0  
339340 1 0 0 0 0  
339341 1 0 0 0 0  
339387 1 0 0 0 0  
342343 1 0 0 0 0  
342344 1 0 0 0 0  
342345 1 0 0 0 0  
345346 1 0 0 0 0  
345347 1 0 0 0 0  
345348 1 0 0 0 0  
348349 1 0 0 0 0  
348356 2 0 0 0 0  
349350 1 0 0 0 0  
350351 1 0 0 0 0  
350352 1 0 0 0 0  
350353 1 0 0 0 0  
353354 1 0 0 0 0  
353355 1 0 0 0 0  
353357 1 0 0 0 0  
357358 1 0 0 0 0  
358359 1 0 0 0 0  
358366 2 0 0 0 0  
359360 1 0 0 0 0  
359361 2 0 0 0 0  
361362 1 0 0 0 0  
361363 1 0 0 0 0  
363364 2 0 0 0 0  
363368 1 0 0 0 0  
364365 1 0 0 0 0  
364366 1 0 0 0 0  
366367 1 0 0 0 0  
368369 1 0 0 0 0  
368370 1 0 0 0 0  
368374 1 0 0 0 0  
369378 1 0 0 0 0  
369385 2 0 0 0 0  
370371 1 0 0 0 0  
370372 1 0 0 0 0  
370373 1 0 0 0 0  
374375 1 0 0 0 0  
374376 1 0 0 0 0  
374377 1 0 0 0 0  
378379 1 0 0 0 0  
378380 2 0 0 0 0  
380381 1 0 0 0 0  
380382 1 0 0 0 0  
382383 2 0 0 0 0  
382387 1 0 0 0 0  
383384 1 0 0 0 0  
383385 1 0 0 0 0  
385386 1 0 0 0 0

M END  
> <NAME>  
D60\_1

\$\$\$  
D61\_1  
MOE2012 3D

417426 0 0 1 0 0 0 0 0999 V2000  
8.1330 14.5630 -11.4110 C 0 0 0 0 0 0 0 0 0 0 0 0 0 0 0













|          |         |        |   |   |   |   |   |   |   |   |   |   |   |   |   |
|----------|---------|--------|---|---|---|---|---|---|---|---|---|---|---|---|---|
| 117.4560 | 7.5460  | 0.8660 | H | 0 | 0 | 0 | 0 | 0 | 0 | 0 | 0 | 0 | 0 | 0 | 0 |
| 115.7490 | 10.0970 | 2.3770 | C | 0 | 0 | 0 | 0 | 0 | 0 | 0 | 0 | 0 | 0 | 0 | 0 |
| 115.0760 | 10.2010 | 1.5280 | H | 0 | 0 | 0 | 0 | 0 | 0 | 0 | 0 | 0 | 0 | 0 | 0 |
| 116.2150 | 11.2590 | 3.0000 | C | 0 | 0 | 0 | 0 | 0 | 0 | 0 | 0 | 0 | 0 | 0 | 0 |
| 115.8980 | 12.2300 | 2.6280 | H | 0 | 0 | 0 | 0 | 0 | 0 | 0 | 0 | 0 | 0 | 0 | 0 |
| 117.0910 | 11.1850 | 4.0830 | C | 0 | 0 | 0 | 0 | 0 | 0 | 0 | 0 | 0 | 0 | 0 | 0 |
| 117.4750 | 9.9320  | 4.5520 | C | 0 | 0 | 0 | 0 | 0 | 0 | 0 | 0 | 0 | 0 | 0 | 0 |
| 118.1360 | 9.8170  | 5.4040 | H | 0 | 0 | 0 | 0 | 0 | 0 | 0 | 0 | 0 | 0 | 0 | 0 |
| 117.0050 | 8.7650  | 3.9300 | C | 0 | 0 | 0 | 0 | 0 | 0 | 0 | 0 | 0 | 0 | 0 | 0 |
| 117.3480 | 7.8150  | 4.3310 | H | 0 | 0 | 0 | 0 | 0 | 0 | 0 | 0 | 0 | 0 | 0 | 0 |
| 117.4730 | 12.3950 | 4.5910 | O | 0 | 0 | 0 | 0 | 0 | 0 | 0 | 0 | 0 | 0 | 0 | 0 |
| 1        | 2       | 1      | 0 | 0 | 0 | 0 | 0 | 0 | 0 | 0 | 0 | 0 | 0 | 0 | 0 |
| 1        | 3       | 1      | 0 | 0 | 0 | 0 | 0 | 0 | 0 | 0 | 0 | 0 | 0 | 0 | 0 |
| 1        | 4       | 1      | 0 | 0 | 0 | 0 | 0 | 0 | 0 | 0 | 0 | 0 | 0 | 0 | 0 |
| 1        | 16      | 1      | 0 | 0 | 0 | 0 | 0 | 0 | 0 | 0 | 0 | 0 | 0 | 0 | 0 |
| 4        | 5       | 1      | 0 | 0 | 0 | 0 | 0 | 0 | 0 | 0 | 0 | 0 | 0 | 0 | 0 |
| 4        | 6       | 1      | 0 | 0 | 0 | 0 | 0 | 0 | 0 | 0 | 0 | 0 | 0 | 0 | 0 |
| 6        | 7       | 1      | 0 | 0 | 0 | 0 | 0 | 0 | 0 | 0 | 0 | 0 | 0 | 0 | 0 |
| 6        | 8       | 1      | 0 | 0 | 0 | 0 | 0 | 0 | 0 | 0 | 0 | 0 | 0 | 0 | 0 |
| 6        | 9       | 1      | 0 | 0 | 0 | 0 | 0 | 0 | 0 | 0 | 0 | 0 | 0 | 0 | 0 |
| 9        | 10      | 1      | 0 | 0 | 0 | 0 | 0 | 0 | 0 | 0 | 0 | 0 | 0 | 0 | 0 |
| 9        | 11      | 1      | 0 | 0 | 0 | 0 | 0 | 0 | 0 | 0 | 0 | 0 | 0 | 0 | 0 |
| 9        | 12      | 1      | 0 | 0 | 0 | 0 | 0 | 0 | 0 | 0 | 0 | 0 | 0 | 0 | 0 |
| 12       | 13      | 1      | 0 | 0 | 0 | 0 | 0 | 0 | 0 | 0 | 0 | 0 | 0 | 0 | 0 |
| 12       | 39      | 1      | 0 | 0 | 0 | 0 | 0 | 0 | 0 | 0 | 0 | 0 | 0 | 0 | 0 |
| 13       | 14      | 1      | 0 | 0 | 0 | 0 | 0 | 0 | 0 | 0 | 0 | 0 | 0 | 0 | 0 |
| 13       | 15      | 1      | 0 | 0 | 0 | 0 | 0 | 0 | 0 | 0 | 0 | 0 | 0 | 0 | 0 |
| 13       | 20      | 1      | 0 | 0 | 0 | 0 | 0 | 0 | 0 | 0 | 0 | 0 | 0 | 0 | 0 |
| 16       | 17      | 1      | 0 | 0 | 0 | 0 | 0 | 0 | 0 | 0 | 0 | 0 | 0 | 0 | 0 |
| 16       | 18      | 1      | 0 | 0 | 0 | 0 | 0 | 0 | 0 | 0 | 0 | 0 | 0 | 0 | 0 |
| 16       | 19      | 1      | 0 | 0 | 0 | 0 | 0 | 0 | 0 | 0 | 0 | 0 | 0 | 0 | 0 |
| 20       | 21      | 1      | 0 | 0 | 0 | 0 | 0 | 0 | 0 | 0 | 0 | 0 | 0 | 0 | 0 |
| 20       | 22      | 1      | 0 | 0 | 0 | 0 | 0 | 0 | 0 | 0 | 0 | 0 | 0 | 0 | 0 |
| 20       | 23      | 1      | 0 | 0 | 0 | 0 | 0 | 0 | 0 | 0 | 0 | 0 | 0 | 0 | 0 |
| 24       | 25      | 1      | 0 | 0 | 0 | 0 | 0 | 0 | 0 | 0 | 0 | 0 | 0 | 0 | 0 |
| 24       | 26      | 1      | 0 | 0 | 0 | 0 | 0 | 0 | 0 | 0 | 0 | 0 | 0 | 0 | 0 |
| 24       | 27      | 1      | 0 | 0 | 0 | 0 | 0 | 0 | 0 | 0 | 0 | 0 | 0 | 0 | 0 |
| 24       | 36      | 1      | 0 | 0 | 0 | 0 | 0 | 0 | 0 | 0 | 0 | 0 | 0 | 0 | 0 |
| 27       | 28      | 1      | 0 | 0 | 0 | 0 | 0 | 0 | 0 | 0 | 0 | 0 | 0 | 0 | 0 |
| 28       | 29      | 1      | 0 | 0 | 0 | 0 | 0 | 0 | 0 | 0 | 0 | 0 | 0 | 0 | 0 |
| 28       | 35      | 2      | 0 | 0 | 0 | 0 | 0 | 0 | 0 | 0 | 0 | 0 | 0 | 0 | 0 |
| 29       | 30      | 1      | 0 | 0 | 0 | 0 | 0 | 0 | 0 | 0 | 0 | 0 | 0 | 0 | 0 |
| 29       | 31      | 1      | 0 | 0 | 0 | 0 | 0 | 0 | 0 | 0 | 0 | 0 | 0 | 0 | 0 |
| 29       | 32      | 1      | 0 | 0 | 0 | 0 | 0 | 0 | 0 | 0 | 0 | 0 | 0 | 0 | 0 |
| 32       | 33      | 1      | 0 | 0 | 0 | 0 | 0 | 0 | 0 | 0 | 0 | 0 | 0 | 0 | 0 |
| 32       | 34      | 1      | 0 | 0 | 0 | 0 | 0 | 0 | 0 | 0 | 0 | 0 | 0 | 0 | 0 |
| 32       | 88      | 1      | 0 | 0 | 0 | 0 | 0 | 0 | 0 | 0 | 0 | 0 | 0 | 0 | 0 |
| 36       | 37      | 1      | 0 | 0 | 0 | 0 | 0 | 0 | 0 | 0 | 0 | 0 | 0 | 0 | 0 |
| 36       | 38      | 1      | 0 | 0 | 0 | 0 | 0 | 0 | 0 | 0 | 0 | 0 | 0 | 0 | 0 |
| 36       | 84      | 1      | 0 | 0 | 0 | 0 | 0 | 0 | 0 | 0 | 0 | 0 | 0 | 0 | 0 |
| 39       | 40      | 1      | 0 | 0 | 0 | 0 | 0 | 0 | 0 | 0 | 0 | 0 | 0 | 0 | 0 |
| 39       | 41      | 1      | 0 | 0 | 0 | 0 | 0 | 0 | 0 | 0 | 0 | 0 | 0 | 0 | 0 |
| 39       | 42      | 1      | 0 | 0 | 0 | 0 | 0 | 0 | 0 | 0 | 0 | 0 | 0 | 0 | 0 |
| 42       | 43      | 1      | 0 | 0 | 0 | 0 | 0 | 0 | 0 | 0 | 0 | 0 | 0 | 0 | 0 |
| 42       | 44      | 1      | 0 | 0 | 0 | 0 | 0 | 0 | 0 | 0 | 0 | 0 | 0 | 0 | 0 |
| 42       | 45      | 1      | 0 | 0 | 0 | 0 | 0 | 0 | 0 | 0 | 0 | 0 | 0 | 0 | 0 |
| 45       | 46      | 1      | 0 | 0 | 0 | 0 | 0 | 0 | 0 | 0 | 0 | 0 | 0 | 0 | 0 |
| 45       | 53      | 2      | 0 | 0 | 0 | 0 | 0 | 0 | 0 | 0 | 0 | 0 | 0 | 0 | 0 |
| 46       | 47      | 1      | 0 | 0 | 0 | 0 | 0 | 0 | 0 | 0 | 0 | 0 | 0 | 0 | 0 |
| 47       | 48      | 1      | 0 | 0 | 0 | 0 | 0 | 0 | 0 | 0 | 0 | 0 | 0 | 0 | 0 |
| 47       | 49      | 1      | 0 | 0 | 0 | 0 | 0 | 0 | 0 | 0 | 0 | 0 | 0 | 0 | 0 |
| 47       | 50      | 1      | 0 | 0 | 0 | 0 | 0 | 0 | 0 | 0 | 0 | 0 | 0 | 0 | 0 |
| 50       | 51      | 1      | 0 | 0 | 0 | 0 | 0 | 0 | 0 | 0 | 0 | 0 | 0 | 0 | 0 |
| 50       | 52      | 1      | 0 | 0 | 0 | 0 | 0 | 0 | 0 | 0 | 0 | 0 | 0 | 0 | 0 |
| 50       | 54      | 1      | 0 | 0 | 0 | 0 | 0 | 0 | 0 | 0 | 0 | 0 | 0 | 0 | 0 |
| 54       | 55      | 1      | 0 | 0 | 0 | 0 | 0 | 0 | 0 | 0 | 0 | 0 | 0 | 0 | 0 |
| 55       | 56      | 1      | 0 | 0 | 0 | 0 | 0 | 0 | 0 | 0 | 0 | 0 | 0 | 0 | 0 |
| 55       | 63      | 2      | 0 | 0 | 0 | 0 | 0 | 0 | 0 | 0 | 0 | 0 | 0 | 0 | 0 |
| 56       | 57      | 1      | 0 | 0 | 0 | 0 | 0 | 0 | 0 | 0 | 0 | 0 | 0 | 0 | 0 |
| 56       | 58      | 2      | 0 | 0 | 0 | 0 | 0 | 0 | 0 | 0 | 0 | 0 | 0 | 0 | 0 |
| 58       | 59      | 1      | 0 | 0 | 0 | 0 | 0 | 0 | 0 | 0 | 0 | 0 | 0 | 0 | 0 |
| 58       | 60      | 1      | 0 | 0 | 0 | 0 | 0 | 0 | 0 | 0 | 0 | 0 | 0 | 0 | 0 |
| 60       | 61      | 2      | 0 | 0 | 0 | 0 | 0 | 0 | 0 | 0 | 0 | 0 | 0 | 0 | 0 |
| 60       | 65      | 1      | 0 | 0 | 0 | 0 | 0 | 0 | 0 | 0 | 0 | 0 | 0 | 0 | 0 |
| 61       | 62      | 1      | 0 | 0 | 0 | 0 | 0 | 0 | 0 | 0 | 0 | 0 | 0 | 0 | 0 |
| 61       | 63      | 1      | 0 | 0 | 0 | 0 | 0 | 0 | 0 | 0 | 0 | 0 | 0 | 0 | 0 |
| 63       | 64      | 1      | 0 | 0 | 0 | 0 | 0 | 0 | 0 | 0 | 0 | 0 | 0 | 0 | 0 |
| 65       | 66      | 1      | 0 | 0 | 0 | 0 | 0 | 0 | 0 | 0 | 0 | 0 | 0 | 0 | 0 |
| 65       | 67      | 1      | 0 | 0 | 0 | 0 | 0 | 0 | 0 | 0 | 0 | 0 | 0 | 0 | 0 |
| 65       | 71      | 1      | 0 | 0 | 0 | 0 | 0 | 0 | 0 | 0 | 0 | 0 | 0 | 0 | 0 |
| 66       | 75      | 1      | 0 | 0 | 0 | 0 | 0 | 0 | 0 | 0 | 0 | 0 | 0 | 0 | 0 |

|     |     |   |   |   |   |   |
|-----|-----|---|---|---|---|---|
| 66  | 82  | 2 | 0 | 0 | 0 | 0 |
| 67  | 68  | 1 | 0 | 0 | 0 | 0 |
| 67  | 69  | 1 | 0 | 0 | 0 | 0 |
| 67  | 70  | 1 | 0 | 0 | 0 | 0 |
| 71  | 72  | 1 | 0 | 0 | 0 | 0 |
| 71  | 73  | 1 | 0 | 0 | 0 | 0 |
| 71  | 74  | 1 | 0 | 0 | 0 | 0 |
| 75  | 76  | 1 | 0 | 0 | 0 | 0 |
| 75  | 77  | 2 | 0 | 0 | 0 | 0 |
| 77  | 78  | 1 | 0 | 0 | 0 | 0 |
| 77  | 79  | 1 | 0 | 0 | 0 | 0 |
| 79  | 80  | 2 | 0 | 0 | 0 | 0 |
| 79  | 84  | 1 | 0 | 0 | 0 | 0 |
| 80  | 81  | 1 | 0 | 0 | 0 | 0 |
| 80  | 82  | 1 | 0 | 0 | 0 | 0 |
| 82  | 83  | 1 | 0 | 0 | 0 | 0 |
| 85  | 86  | 1 | 0 | 0 | 0 | 0 |
| 85  | 87  | 1 | 0 | 0 | 0 | 0 |
| 85  | 88  | 1 | 0 | 0 | 0 | 0 |
| 85  | 99  | 1 | 0 | 0 | 0 | 0 |
| 88  | 89  | 1 | 0 | 0 | 0 | 0 |
| 89  | 90  | 1 | 0 | 0 | 0 | 0 |
| 89  | 91  | 1 | 0 | 0 | 0 | 0 |
| 89  | 92  | 1 | 0 | 0 | 0 | 0 |
| 92  | 93  | 1 | 0 | 0 | 0 | 0 |
| 92  | 94  | 1 | 0 | 0 | 0 | 0 |
| 92  | 95  | 1 | 0 | 0 | 0 | 0 |
| 95  | 96  | 1 | 0 | 0 | 0 | 0 |
| 95  | 122 | 1 | 0 | 0 | 0 | 0 |
| 96  | 97  | 1 | 0 | 0 | 0 | 0 |
| 96  | 98  | 1 | 0 | 0 | 0 | 0 |
| 96  | 103 | 1 | 0 | 0 | 0 | 0 |
| 99  | 100 | 1 | 0 | 0 | 0 | 0 |
| 99  | 101 | 1 | 0 | 0 | 0 | 0 |
| 99  | 102 | 1 | 0 | 0 | 0 | 0 |
| 103 | 104 | 1 | 0 | 0 | 0 | 0 |
| 103 | 105 | 1 | 0 | 0 | 0 | 0 |
| 103 | 106 | 1 | 0 | 0 | 0 | 0 |
| 107 | 108 | 1 | 0 | 0 | 0 | 0 |
| 107 | 109 | 1 | 0 | 0 | 0 | 0 |
| 107 | 110 | 1 | 0 | 0 | 0 | 0 |
| 107 | 119 | 1 | 0 | 0 | 0 | 0 |
| 110 | 111 | 1 | 0 | 0 | 0 | 0 |
| 111 | 112 | 1 | 0 | 0 | 0 | 0 |
| 111 | 118 | 2 | 0 | 0 | 0 | 0 |
| 112 | 113 | 1 | 0 | 0 | 0 | 0 |
| 112 | 114 | 1 | 0 | 0 | 0 | 0 |
| 112 | 115 | 1 | 0 | 0 | 0 | 0 |
| 115 | 116 | 1 | 0 | 0 | 0 | 0 |
| 115 | 117 | 1 | 0 | 0 | 0 | 0 |
| 115 | 171 | 1 | 0 | 0 | 0 | 0 |
| 119 | 120 | 1 | 0 | 0 | 0 | 0 |
| 119 | 121 | 1 | 0 | 0 | 0 | 0 |
| 119 | 167 | 1 | 0 | 0 | 0 | 0 |
| 122 | 123 | 1 | 0 | 0 | 0 | 0 |
| 122 | 124 | 1 | 0 | 0 | 0 | 0 |
| 122 | 125 | 1 | 0 | 0 | 0 | 0 |
| 125 | 126 | 1 | 0 | 0 | 0 | 0 |
| 125 | 127 | 1 | 0 | 0 | 0 | 0 |
| 125 | 128 | 1 | 0 | 0 | 0 | 0 |
| 128 | 129 | 1 | 0 | 0 | 0 | 0 |
| 128 | 136 | 2 | 0 | 0 | 0 | 0 |
| 129 | 130 | 1 | 0 | 0 | 0 | 0 |
| 130 | 131 | 1 | 0 | 0 | 0 | 0 |
| 130 | 132 | 1 | 0 | 0 | 0 | 0 |
| 130 | 133 | 1 | 0 | 0 | 0 | 0 |
| 133 | 134 | 1 | 0 | 0 | 0 | 0 |
| 133 | 135 | 1 | 0 | 0 | 0 | 0 |
| 133 | 137 | 1 | 0 | 0 | 0 | 0 |
| 137 | 138 | 1 | 0 | 0 | 0 | 0 |
| 138 | 139 | 1 | 0 | 0 | 0 | 0 |
| 138 | 146 | 2 | 0 | 0 | 0 | 0 |
| 139 | 140 | 1 | 0 | 0 | 0 | 0 |
| 139 | 141 | 2 | 0 | 0 | 0 | 0 |
| 141 | 142 | 1 | 0 | 0 | 0 | 0 |
| 141 | 143 | 1 | 0 | 0 | 0 | 0 |
| 143 | 144 | 2 | 0 | 0 | 0 | 0 |
| 143 | 148 | 1 | 0 | 0 | 0 | 0 |
| 144 | 145 | 1 | 0 | 0 | 0 | 0 |
| 144 | 146 | 1 | 0 | 0 | 0 | 0 |
| 146 | 147 | 1 | 0 | 0 | 0 | 0 |

|        |   |   |   |   |   |
|--------|---|---|---|---|---|
| 148149 | 1 | 0 | 0 | 0 | 0 |
| 148150 | 1 | 0 | 0 | 0 | 0 |
| 148154 | 1 | 0 | 0 | 0 | 0 |
| 149158 | 1 | 0 | 0 | 0 | 0 |
| 149165 | 2 | 0 | 0 | 0 | 0 |
| 150151 | 1 | 0 | 0 | 0 | 0 |
| 150152 | 1 | 0 | 0 | 0 | 0 |
| 150153 | 1 | 0 | 0 | 0 | 0 |
| 154155 | 1 | 0 | 0 | 0 | 0 |
| 154156 | 1 | 0 | 0 | 0 | 0 |
| 154157 | 1 | 0 | 0 | 0 | 0 |
| 158159 | 1 | 0 | 0 | 0 | 0 |
| 158160 | 2 | 0 | 0 | 0 | 0 |
| 160161 | 1 | 0 | 0 | 0 | 0 |
| 160162 | 1 | 0 | 0 | 0 | 0 |
| 162163 | 2 | 0 | 0 | 0 | 0 |
| 162167 | 1 | 0 | 0 | 0 | 0 |
| 163164 | 1 | 0 | 0 | 0 | 0 |
| 163165 | 1 | 0 | 0 | 0 | 0 |
| 165166 | 1 | 0 | 0 | 0 | 0 |
| 168169 | 1 | 0 | 0 | 0 | 0 |
| 168170 | 1 | 0 | 0 | 0 | 0 |
| 168171 | 1 | 0 | 0 | 0 | 0 |
| 168182 | 1 | 0 | 0 | 0 | 0 |
| 171172 | 1 | 0 | 0 | 0 | 0 |
| 172173 | 1 | 0 | 0 | 0 | 0 |
| 172174 | 1 | 0 | 0 | 0 | 0 |
| 172175 | 1 | 0 | 0 | 0 | 0 |
| 175176 | 1 | 0 | 0 | 0 | 0 |
| 175177 | 1 | 0 | 0 | 0 | 0 |
| 175178 | 1 | 0 | 0 | 0 | 0 |
| 178179 | 1 | 0 | 0 | 0 | 0 |
| 178205 | 1 | 0 | 0 | 0 | 0 |
| 179180 | 1 | 0 | 0 | 0 | 0 |
| 179181 | 1 | 0 | 0 | 0 | 0 |
| 179186 | 1 | 0 | 0 | 0 | 0 |
| 182183 | 1 | 0 | 0 | 0 | 0 |
| 182184 | 1 | 0 | 0 | 0 | 0 |
| 182185 | 1 | 0 | 0 | 0 | 0 |
| 186187 | 1 | 0 | 0 | 0 | 0 |
| 186188 | 1 | 0 | 0 | 0 | 0 |
| 186189 | 1 | 0 | 0 | 0 | 0 |
| 190191 | 1 | 0 | 0 | 0 | 0 |
| 190192 | 1 | 0 | 0 | 0 | 0 |
| 190193 | 1 | 0 | 0 | 0 | 0 |
| 190202 | 1 | 0 | 0 | 0 | 0 |
| 193194 | 1 | 0 | 0 | 0 | 0 |
| 194195 | 1 | 0 | 0 | 0 | 0 |
| 194201 | 2 | 0 | 0 | 0 | 0 |
| 195196 | 1 | 0 | 0 | 0 | 0 |
| 195197 | 1 | 0 | 0 | 0 | 0 |
| 195198 | 1 | 0 | 0 | 0 | 0 |
| 198199 | 1 | 0 | 0 | 0 | 0 |
| 198200 | 1 | 0 | 0 | 0 | 0 |
| 198254 | 1 | 0 | 0 | 0 | 0 |
| 202203 | 1 | 0 | 0 | 0 | 0 |
| 202204 | 1 | 0 | 0 | 0 | 0 |
| 202250 | 1 | 0 | 0 | 0 | 0 |
| 205206 | 1 | 0 | 0 | 0 | 0 |
| 205207 | 1 | 0 | 0 | 0 | 0 |
| 205208 | 1 | 0 | 0 | 0 | 0 |
| 208209 | 1 | 0 | 0 | 0 | 0 |
| 208210 | 1 | 0 | 0 | 0 | 0 |
| 208211 | 1 | 0 | 0 | 0 | 0 |
| 211212 | 1 | 0 | 0 | 0 | 0 |
| 211219 | 2 | 0 | 0 | 0 | 0 |
| 212213 | 1 | 0 | 0 | 0 | 0 |
| 213214 | 1 | 0 | 0 | 0 | 0 |
| 213215 | 1 | 0 | 0 | 0 | 0 |
| 213216 | 1 | 0 | 0 | 0 | 0 |
| 216217 | 1 | 0 | 0 | 0 | 0 |
| 216218 | 1 | 0 | 0 | 0 | 0 |
| 216220 | 1 | 0 | 0 | 0 | 0 |
| 220221 | 1 | 0 | 0 | 0 | 0 |
| 221222 | 1 | 0 | 0 | 0 | 0 |
| 221229 | 2 | 0 | 0 | 0 | 0 |
| 222223 | 1 | 0 | 0 | 0 | 0 |
| 222224 | 2 | 0 | 0 | 0 | 0 |
| 224225 | 1 | 0 | 0 | 0 | 0 |
| 224226 | 1 | 0 | 0 | 0 | 0 |
| 226227 | 2 | 0 | 0 | 0 | 0 |

|        |   |   |   |   |   |
|--------|---|---|---|---|---|
| 226231 | 1 | 0 | 0 | 0 | 0 |
| 227228 | 1 | 0 | 0 | 0 | 0 |
| 227229 | 1 | 0 | 0 | 0 | 0 |
| 229230 | 1 | 0 | 0 | 0 | 0 |
| 231232 | 1 | 0 | 0 | 0 | 0 |
| 231233 | 1 | 0 | 0 | 0 | 0 |
| 231237 | 1 | 0 | 0 | 0 | 0 |
| 232241 | 1 | 0 | 0 | 0 | 0 |
| 232248 | 2 | 0 | 0 | 0 | 0 |
| 233234 | 1 | 0 | 0 | 0 | 0 |
| 233235 | 1 | 0 | 0 | 0 | 0 |
| 233236 | 1 | 0 | 0 | 0 | 0 |
| 237238 | 1 | 0 | 0 | 0 | 0 |
| 237239 | 1 | 0 | 0 | 0 | 0 |
| 237240 | 1 | 0 | 0 | 0 | 0 |
| 241242 | 1 | 0 | 0 | 0 | 0 |
| 241243 | 2 | 0 | 0 | 0 | 0 |
| 243244 | 1 | 0 | 0 | 0 | 0 |
| 243245 | 1 | 0 | 0 | 0 | 0 |
| 245246 | 2 | 0 | 0 | 0 | 0 |
| 245250 | 1 | 0 | 0 | 0 | 0 |
| 246247 | 1 | 0 | 0 | 0 | 0 |
| 246248 | 1 | 0 | 0 | 0 | 0 |
| 248249 | 1 | 0 | 0 | 0 | 0 |
| 251252 | 1 | 0 | 0 | 0 | 0 |
| 251253 | 1 | 0 | 0 | 0 | 0 |
| 251254 | 1 | 0 | 0 | 0 | 0 |
| 251265 | 1 | 0 | 0 | 0 | 0 |
| 254255 | 1 | 0 | 0 | 0 | 0 |
| 255256 | 1 | 0 | 0 | 0 | 0 |
| 255257 | 1 | 0 | 0 | 0 | 0 |
| 255258 | 1 | 0 | 0 | 0 | 0 |
| 258259 | 1 | 0 | 0 | 0 | 0 |
| 258260 | 1 | 0 | 0 | 0 | 0 |
| 258261 | 1 | 0 | 0 | 0 | 0 |
| 261262 | 1 | 0 | 0 | 0 | 0 |
| 261288 | 1 | 0 | 0 | 0 | 0 |
| 262263 | 1 | 0 | 0 | 0 | 0 |
| 262264 | 1 | 0 | 0 | 0 | 0 |
| 262269 | 1 | 0 | 0 | 0 | 0 |
| 265266 | 1 | 0 | 0 | 0 | 0 |
| 265267 | 1 | 0 | 0 | 0 | 0 |
| 265268 | 1 | 0 | 0 | 0 | 0 |
| 269270 | 1 | 0 | 0 | 0 | 0 |
| 269271 | 1 | 0 | 0 | 0 | 0 |
| 269272 | 1 | 0 | 0 | 0 | 0 |
| 273274 | 1 | 0 | 0 | 0 | 0 |
| 273275 | 1 | 0 | 0 | 0 | 0 |
| 273276 | 1 | 0 | 0 | 0 | 0 |
| 273285 | 1 | 0 | 0 | 0 | 0 |
| 276277 | 1 | 0 | 0 | 0 | 0 |
| 277278 | 1 | 0 | 0 | 0 | 0 |
| 277284 | 2 | 0 | 0 | 0 | 0 |
| 278279 | 1 | 0 | 0 | 0 | 0 |
| 278280 | 1 | 0 | 0 | 0 | 0 |
| 278281 | 1 | 0 | 0 | 0 | 0 |
| 281282 | 1 | 0 | 0 | 0 | 0 |
| 281283 | 1 | 0 | 0 | 0 | 0 |
| 281337 | 1 | 0 | 0 | 0 | 0 |
| 285286 | 1 | 0 | 0 | 0 | 0 |
| 285287 | 1 | 0 | 0 | 0 | 0 |
| 285333 | 1 | 0 | 0 | 0 | 0 |
| 288289 | 1 | 0 | 0 | 0 | 0 |
| 288290 | 1 | 0 | 0 | 0 | 0 |
| 288291 | 1 | 0 | 0 | 0 | 0 |
| 291292 | 1 | 0 | 0 | 0 | 0 |
| 291293 | 1 | 0 | 0 | 0 | 0 |
| 291294 | 1 | 0 | 0 | 0 | 0 |
| 294295 | 1 | 0 | 0 | 0 | 0 |
| 294302 | 2 | 0 | 0 | 0 | 0 |
| 295296 | 1 | 0 | 0 | 0 | 0 |
| 296297 | 1 | 0 | 0 | 0 | 0 |
| 296298 | 1 | 0 | 0 | 0 | 0 |
| 296299 | 1 | 0 | 0 | 0 | 0 |
| 299300 | 1 | 0 | 0 | 0 | 0 |
| 299301 | 1 | 0 | 0 | 0 | 0 |
| 299303 | 1 | 0 | 0 | 0 | 0 |
| 303304 | 1 | 0 | 0 | 0 | 0 |
| 304305 | 1 | 0 | 0 | 0 | 0 |
| 304312 | 2 | 0 | 0 | 0 | 0 |
| 305306 | 1 | 0 | 0 | 0 | 0 |

|        |   |   |   |   |   |
|--------|---|---|---|---|---|
| 305307 | 2 | 0 | 0 | 0 | 0 |
| 307308 | 1 | 0 | 0 | 0 | 0 |
| 307309 | 1 | 0 | 0 | 0 | 0 |
| 309310 | 2 | 0 | 0 | 0 | 0 |
| 309314 | 1 | 0 | 0 | 0 | 0 |
| 310311 | 1 | 0 | 0 | 0 | 0 |
| 310312 | 1 | 0 | 0 | 0 | 0 |
| 312313 | 1 | 0 | 0 | 0 | 0 |
| 314315 | 1 | 0 | 0 | 0 | 0 |
| 314316 | 1 | 0 | 0 | 0 | 0 |
| 314320 | 1 | 0 | 0 | 0 | 0 |
| 315324 | 1 | 0 | 0 | 0 | 0 |
| 315331 | 2 | 0 | 0 | 0 | 0 |
| 316317 | 1 | 0 | 0 | 0 | 0 |
| 316318 | 1 | 0 | 0 | 0 | 0 |
| 316319 | 1 | 0 | 0 | 0 | 0 |
| 320321 | 1 | 0 | 0 | 0 | 0 |
| 320322 | 1 | 0 | 0 | 0 | 0 |
| 320323 | 1 | 0 | 0 | 0 | 0 |
| 324325 | 1 | 0 | 0 | 0 | 0 |
| 324326 | 2 | 0 | 0 | 0 | 0 |
| 326327 | 1 | 0 | 0 | 0 | 0 |
| 326328 | 1 | 0 | 0 | 0 | 0 |
| 328329 | 2 | 0 | 0 | 0 | 0 |
| 328333 | 1 | 0 | 0 | 0 | 0 |
| 329330 | 1 | 0 | 0 | 0 | 0 |
| 329331 | 1 | 0 | 0 | 0 | 0 |
| 331332 | 1 | 0 | 0 | 0 | 0 |
| 334335 | 1 | 0 | 0 | 0 | 0 |
| 334336 | 1 | 0 | 0 | 0 | 0 |
| 334337 | 1 | 0 | 0 | 0 | 0 |
| 334348 | 1 | 0 | 0 | 0 | 0 |
| 337338 | 1 | 0 | 0 | 0 | 0 |
| 338339 | 1 | 0 | 0 | 0 | 0 |
| 338340 | 1 | 0 | 0 | 0 | 0 |
| 338341 | 1 | 0 | 0 | 0 | 0 |
| 341342 | 1 | 0 | 0 | 0 | 0 |
| 341343 | 1 | 0 | 0 | 0 | 0 |
| 341344 | 1 | 0 | 0 | 0 | 0 |
| 344345 | 1 | 0 | 0 | 0 | 0 |
| 344372 | 1 | 0 | 0 | 0 | 0 |
| 345346 | 1 | 0 | 0 | 0 | 0 |
| 345347 | 1 | 0 | 0 | 0 | 0 |
| 345352 | 1 | 0 | 0 | 0 | 0 |
| 348349 | 1 | 0 | 0 | 0 | 0 |
| 348350 | 1 | 0 | 0 | 0 | 0 |
| 348351 | 1 | 0 | 0 | 0 | 0 |
| 352353 | 1 | 0 | 0 | 0 | 0 |
| 352354 | 1 | 0 | 0 | 0 | 0 |
| 352355 | 1 | 0 | 0 | 0 | 0 |
| 356357 | 1 | 0 | 0 | 0 | 0 |
| 356358 | 1 | 0 | 0 | 0 | 0 |
| 356359 | 1 | 0 | 0 | 0 | 0 |
| 356369 | 1 | 0 | 0 | 0 | 0 |
| 359360 | 1 | 0 | 0 | 0 | 0 |
| 360361 | 1 | 0 | 0 | 0 | 0 |
| 360368 | 2 | 0 | 0 | 0 | 0 |
| 361362 | 1 | 0 | 0 | 0 | 0 |
| 361363 | 1 | 0 | 0 | 0 | 0 |
| 361364 | 1 | 0 | 0 | 0 | 0 |
| 364365 | 1 | 0 | 0 | 0 | 0 |
| 364366 | 1 | 0 | 0 | 0 | 0 |
| 364367 | 1 | 0 | 0 | 0 | 0 |
| 369370 | 1 | 0 | 0 | 0 | 0 |
| 369371 | 1 | 0 | 0 | 0 | 0 |
| 369417 | 1 | 0 | 0 | 0 | 0 |
| 372373 | 1 | 0 | 0 | 0 | 0 |
| 372374 | 1 | 0 | 0 | 0 | 0 |
| 372375 | 1 | 0 | 0 | 0 | 0 |
| 375376 | 1 | 0 | 0 | 0 | 0 |
| 375377 | 1 | 0 | 0 | 0 | 0 |
| 375378 | 1 | 0 | 0 | 0 | 0 |
| 378379 | 1 | 0 | 0 | 0 | 0 |
| 378386 | 2 | 0 | 0 | 0 | 0 |
| 379380 | 1 | 0 | 0 | 0 | 0 |
| 380381 | 1 | 0 | 0 | 0 | 0 |
| 380382 | 1 | 0 | 0 | 0 | 0 |
| 380383 | 1 | 0 | 0 | 0 | 0 |
| 383384 | 1 | 0 | 0 | 0 | 0 |
| 383385 | 1 | 0 | 0 | 0 | 0 |
| 383387 | 1 | 0 | 0 | 0 | 0 |

```

387388 1 0 0 0 0
388389 1 0 0 0 0
388396 2 0 0 0 0
389390 1 0 0 0 0
389391 2 0 0 0 0
391392 1 0 0 0 0
391393 1 0 0 0 0
393394 2 0 0 0 0
393398 1 0 0 0 0
394395 1 0 0 0 0
394396 1 0 0 0 0
396397 1 0 0 0 0
398399 1 0 0 0 0
398400 1 0 0 0 0
398404 1 0 0 0 0
399408 1 0 0 0 0
399415 2 0 0 0 0
400401 1 0 0 0 0
400402 1 0 0 0 0
400403 1 0 0 0 0
404405 1 0 0 0 0
404406 1 0 0 0 0
404407 1 0 0 0 0
408409 1 0 0 0 0
408410 2 0 0 0 0
410411 1 0 0 0 0
410412 1 0 0 0 0
412413 2 0 0 0 0
412417 1 0 0 0 0
413414 1 0 0 0 0
413415 1 0 0 0 0
415416 1 0 0 0 0

```

```

M END
> <NAME>
D61_1

```

```

$$$$
D70_1
MOE2012 3D

```

```

392406 0 0 1 0 0 0 0 0 0999 V2000
15.7720 -5.4180 25.7480 C 0 0 0 0 0 0 0 0 0 0 0 0 0 0 0
16.7610 -5.0700 26.0740 H 0 0 0 0 0 0 0 0 0 0 0 0 0 0 0
15.0740 -5.0550 26.5130 H 0 0 0 0 0 0 0 0 0 0 0 0 0 0 0
15.3840 -4.7640 24.4270 C 0 0 0 0 0 0 0 0 0 0 0 0 0 0 0
14.2900 -4.6960 24.3700 H 0 0 0 0 0 0 0 0 0 0 0 0 0 0 0
15.7530 -3.7300 24.4390 H 0 0 0 0 0 0 0 0 0 0 0 0 0 0 0
15.8750 -5.4560 23.1560 C 0 0 0 0 0 0 0 0 0 0 0 0 0 0 0
15.2070 -6.2890 22.8980 H 0 0 0 0 0 0 0 0 0 0 0 0 0 0 0
15.7320 -4.7320 22.3450 H 0 0 0 0 0 0 0 0 0 0 0 0 0 0 0
15.6990 -6.8780 25.7170 N 0 0 3 0 0 0 0 0 0 0 0 0 0 0 0
15.5420 -7.2030 26.6710 H 0 0 0 0 0 0 0 0 0 0 0 0 0 0 0
17.2800 -5.9000 23.2380 N 0 0 3 0 0 0 0 0 0 0 0 0 0 0 0
16.9750 -7.4500 25.2640 C 0 0 0 0 0 0 0 0 0 0 0 0 0 0 0
17.7990 -7.0610 25.8780 H 0 0 0 0 0 0 0 0 0 0 0 0 0 0 0
16.9390 -8.5270 25.4690 H 0 0 0 0 0 0 0 0 0 0 0 0 0 0 0
17.3220 -7.2840 23.7700 C 0 0 0 0 0 0 0 0 0 0 0 0 0 0 0
16.6800 -7.9450 23.1720 H 0 0 0 0 0 0 0 0 0 0 0 0 0 0 0
18.3420 -7.6770 23.6620 H 0 0 0 0 0 0 0 0 0 0 0 0 0 0 0
28.6380 -5.7660 9.2450 C 0 0 0 0 0 0 0 0 0 0 0 0 0 0 0
28.0990 -4.8450 9.4900 H 0 0 0 0 0 0 0 0 0 0 0 0 0 0 0
27.8830 -6.4490 8.8350 H 0 0 0 0 0 0 0 0 0 0 0 0 0 0 0
29.6200 -5.4250 8.2500 O 0 0 0 0 0 0 0 0 0 0 0 0 0 0 0
30.0640 -6.4520 7.4740 C 0 0 0 0 0 0 0 0 0 0 0 0 0 0 0
31.0180 -5.9560 6.4180 C 0 0 0 0 0 0 0 0 0 0 0 0 0 0 0
31.4130 -6.8360 5.8950 H 0 0 0 0 0 0 0 0 0 0 0 0 0 0 0
30.4430 -5.3680 5.6940 H 0 0 0 0 0 0 0 0 0 0 0 0 0 0 0
32.1670 -5.1500 7.0250 C 0 0 0 0 0 0 0 0 0 0 0 0 0 0 0
31.7840 -4.2070 7.4290 H 0 0 0 0 0 0 0 0 0 0 0 0 0 0 0
32.5540 -5.7140 7.8850 H 0 0 0 0 0 0 0 0 0 0 0 0 0 0 0
29.7120 -7.6190 7.5800 O 0 0 0 0 0 0 0 0 0 0 0 0 0 0 0
29.2920 -6.3490 10.4940 C 0 0 0 0 0 0 0 0 0 0 0 0 0 0 0
29.7380 -7.3190 10.2450 H 0 0 0 0 0 0 0 0 0 0 0 0 0 0 0
30.1350 -5.7410 10.8440 H 0 0 0 0 0 0 0 0 0 0 0 0 0 0 0
17.9170 -5.8730 21.9040 C 0 0 0 0 0 0 0 0 0 0 0 0 0 0 0
18.8350 -6.4750 21.9210 H 0 0 0 0 0 0 0 0 0 0 0 0 0 0 0
17.2650 -6.3260 21.1460 H 0 0 0 0 0 0 0 0 0 0 0 0 0 0 0
18.3260 -4.4520 21.5060 C 0 0 0 0 0 0 0 0 0 0 0 0 0 0 0
17.4580 -3.7880 21.4590 H 0 0 0 0 0 0 0 0 0 0 0 0 0 0 0
19.0420 -4.0500 22.2320 H 0 0 0 0 0 0 0 0 0 0 0 0 0 0 0
18.9790 -4.4460 20.1470 C 0 0 0 0 0 0 0 0 0 0 0 0 0 0 0

```





|         |         |         |   |   |   |   |   |   |   |   |   |   |   |   |
|---------|---------|---------|---|---|---|---|---|---|---|---|---|---|---|---|
| 37.4320 | 2.1800  | 2.3960  | H | 0 | 0 | 0 | 0 | 0 | 0 | 0 | 0 | 0 | 0 | 0 |
| 38.5630 | 0.8100  | 3.6210  | C | 0 | 0 | 0 | 0 | 0 | 0 | 0 | 0 | 0 | 0 | 0 |
| 38.3040 | 1.2990  | 4.5680  | H | 0 | 0 | 0 | 0 | 0 | 0 | 0 | 0 | 0 | 0 | 0 |
| 38.6260 | -0.2720 | 3.7910  | H | 0 | 0 | 0 | 0 | 0 | 0 | 0 | 0 | 0 | 0 | 0 |
| 36.6000 | -1.4660 | 2.4940  | O | 0 | 0 | 0 | 0 | 0 | 0 | 0 | 0 | 0 | 0 | 0 |
| 39.8010 | 1.3080  | 3.1190  | O | 0 | 0 | 0 | 0 | 0 | 0 | 0 | 0 | 0 | 0 | 0 |
| 40.9010 | 1.1500  | 3.9160  | C | 0 | 0 | 0 | 0 | 0 | 0 | 0 | 0 | 0 | 0 | 0 |
| 42.0800 | 1.6930  | 3.4060  | C | 0 | 0 | 0 | 0 | 0 | 0 | 0 | 0 | 0 | 0 | 0 |
| 42.0700 | 2.1950  | 2.4420  | H | 0 | 0 | 0 | 0 | 0 | 0 | 0 | 0 | 0 | 0 | 0 |
| 43.2740 | 1.6010  | 4.1260  | C | 0 | 0 | 0 | 0 | 0 | 0 | 0 | 0 | 0 | 0 | 0 |
| 44.1740 | 2.0360  | 3.6930  | H | 0 | 0 | 0 | 0 | 0 | 0 | 0 | 0 | 0 | 0 | 0 |
| 43.3260 | 0.9590  | 5.3780  | C | 0 | 0 | 0 | 0 | 0 | 0 | 0 | 0 | 0 | 0 | 0 |
| 42.1300 | 0.4170  | 5.8750  | C | 0 | 0 | 0 | 0 | 0 | 0 | 0 | 0 | 0 | 0 | 0 |
| 42.0930 | -0.0890 | 6.8360  | H | 0 | 0 | 0 | 0 | 0 | 0 | 0 | 0 | 0 | 0 | 0 |
| 40.9320 | 0.5090  | 5.1530  | C | 0 | 0 | 0 | 0 | 0 | 0 | 0 | 0 | 0 | 0 | 0 |
| 40.0440 | 0.0670  | 5.5920  | H | 0 | 0 | 0 | 0 | 0 | 0 | 0 | 0 | 0 | 0 | 0 |
| 44.6650 | 0.8890  | 6.1490  | C | 0 | 0 | 0 | 0 | 0 | 0 | 0 | 0 | 0 | 0 | 0 |
| 45.7710 | 0.2260  | 5.2920  | C | 0 | 0 | 0 | 0 | 0 | 0 | 0 | 0 | 0 | 0 | 0 |
| 44.9990 | 2.3420  | 6.5800  | C | 0 | 0 | 0 | 0 | 0 | 0 | 0 | 0 | 0 | 0 | 0 |
| 45.1910 | 2.9980  | 5.7220  | H | 0 | 0 | 0 | 0 | 0 | 0 | 0 | 0 | 0 | 0 | 0 |
| 45.8840 | 2.3810  | 7.2270  | H | 0 | 0 | 0 | 0 | 0 | 0 | 0 | 0 | 0 | 0 | 0 |
| 44.1710 | 2.7860  | 7.1470  | H | 0 | 0 | 0 | 0 | 0 | 0 | 0 | 0 | 0 | 0 | 0 |
| 44.5860 | 0.0650  | 7.4630  | C | 0 | 0 | 0 | 0 | 0 | 0 | 0 | 0 | 0 | 0 | 0 |
| 43.8800 | 0.5080  | 8.1760  | H | 0 | 0 | 0 | 0 | 0 | 0 | 0 | 0 | 0 | 0 | 0 |
| 44.2720 | -0.9710 | 7.2860  | H | 0 | 0 | 0 | 0 | 0 | 0 | 0 | 0 | 0 | 0 | 0 |
| 45.5620 | 0.0230  | 7.9620  | H | 0 | 0 | 0 | 0 | 0 | 0 | 0 | 0 | 0 | 0 | 0 |
| 45.5350 | -1.0280 | 4.6970  | C | 0 | 0 | 0 | 0 | 0 | 0 | 0 | 0 | 0 | 0 | 0 |
| 44.5740 | -1.5230 | 4.8180  | H | 0 | 0 | 0 | 0 | 0 | 0 | 0 | 0 | 0 | 0 | 0 |
| 46.5210 | -1.6680 | 3.9390  | C | 0 | 0 | 0 | 0 | 0 | 0 | 0 | 0 | 0 | 0 | 0 |
| 46.3070 | -2.6350 | 3.4910  | H | 0 | 0 | 0 | 0 | 0 | 0 | 0 | 0 | 0 | 0 | 0 |
| 47.7750 | -1.0850 | 3.7640  | C | 0 | 0 | 0 | 0 | 0 | 0 | 0 | 0 | 0 | 0 | 0 |
| 48.0250 | 0.1580  | 4.3380  | C | 0 | 0 | 0 | 0 | 0 | 0 | 0 | 0 | 0 | 0 | 0 |
| 48.9770 | 0.6650  | 4.2170  | H | 0 | 0 | 0 | 0 | 0 | 0 | 0 | 0 | 0 | 0 | 0 |
| 47.0350 | 0.8040  | 5.0950  | C | 0 | 0 | 0 | 0 | 0 | 0 | 0 | 0 | 0 | 0 | 0 |
| 47.2890 | 1.7680  | 5.5280  | H | 0 | 0 | 0 | 0 | 0 | 0 | 0 | 0 | 0 | 0 | 0 |
| 48.6440 | -1.8180 | 3.0060  | O | 0 | 0 | 0 | 0 | 0 | 0 | 0 | 0 | 0 | 0 | 0 |
| 56.9960 | -1.3110 | 1.7180  | C | 0 | 0 | 0 | 0 | 0 | 0 | 0 | 0 | 0 | 0 | 0 |
| 57.4270 | -2.3210 | 1.6720  | H | 0 | 0 | 0 | 0 | 0 | 0 | 0 | 0 | 0 | 0 | 0 |
| 56.2890 | -1.3540 | 2.5550  | H | 0 | 0 | 0 | 0 | 0 | 0 | 0 | 0 | 0 | 0 | 0 |
| 58.0670 | -0.3020 | 2.1240  | C | 0 | 0 | 0 | 0 | 0 | 0 | 0 | 0 | 0 | 0 | 0 |
| 57.5820 | 0.5680  | 2.5860  | H | 0 | 0 | 0 | 0 | 0 | 0 | 0 | 0 | 0 | 0 | 0 |
| 58.6760 | -0.7640 | 2.9130  | H | 0 | 0 | 0 | 0 | 0 | 0 | 0 | 0 | 0 | 0 | 0 |
| 58.9920 | 0.2080  | 1.0220  | C | 0 | 0 | 0 | 0 | 0 | 0 | 0 | 0 | 0 | 0 | 0 |
| 58.5340 | 1.0670  | 0.5140  | H | 0 | 0 | 0 | 0 | 0 | 0 | 0 | 0 | 0 | 0 | 0 |
| 59.8760 | 0.6120  | 1.5340  | H | 0 | 0 | 0 | 0 | 0 | 0 | 0 | 0 | 0 | 0 | 0 |
| 56.3130 | -0.9600 | 0.4590  | N | 0 | 0 | 3 | 0 | 0 | 0 | 0 | 0 | 0 | 0 | 0 |
| 59.3860 | -0.8340 | 0.0650  | N | 0 | 0 | 3 | 0 | 0 | 0 | 0 | 0 | 0 | 0 | 0 |
| 57.0450 | -1.5720 | -0.6750 | C | 0 | 0 | 0 | 0 | 0 | 0 | 0 | 0 | 0 | 0 | 0 |
| 57.1810 | -2.6500 | -0.5110 | H | 0 | 0 | 0 | 0 | 0 | 0 | 0 | 0 | 0 | 0 | 0 |
| 56.4350 | -1.4820 | -1.5840 | H | 0 | 0 | 0 | 0 | 0 | 0 | 0 | 0 | 0 | 0 | 0 |
| 58.4020 | -0.9300 | -1.0310 | C | 0 | 0 | 0 | 0 | 0 | 0 | 0 | 0 | 0 | 0 | 0 |
| 58.2150 | 0.0570  | -1.4750 | H | 0 | 0 | 0 | 0 | 0 | 0 | 0 | 0 | 0 | 0 | 0 |
| 58.8240 | -1.5490 | -1.8350 | H | 0 | 0 | 0 | 0 | 0 | 0 | 0 | 0 | 0 | 0 | 0 |
| 76.0970 | 1.0200  | -2.6410 | C | 0 | 0 | 0 | 0 | 0 | 0 | 0 | 0 | 0 | 0 | 0 |
| 75.4990 | 1.8420  | -3.0470 | H | 0 | 0 | 0 | 0 | 0 | 0 | 0 | 0 | 0 | 0 | 0 |
| 75.5940 | 0.1000  | -2.9650 | H | 0 | 0 | 0 | 0 | 0 | 0 | 0 | 0 | 0 | 0 | 0 |
| 77.4090 | 1.1270  | -3.2160 | O | 0 | 0 | 0 | 0 | 0 | 0 | 0 | 0 | 0 | 0 | 0 |
| 78.1280 | -0.0300 | -3.2400 | C | 0 | 0 | 0 | 0 | 0 | 0 | 0 | 0 | 0 | 0 | 0 |
| 79.4810 | 0.2040  | -3.8560 | C | 0 | 0 | 0 | 0 | 0 | 0 | 0 | 0 | 0 | 0 | 0 |
| 79.4060 | -0.0580 | -4.9160 | H | 0 | 0 | 0 | 0 | 0 | 0 | 0 | 0 | 0 | 0 | 0 |
| 79.7440 | 1.2650  | -3.7760 | H | 0 | 0 | 0 | 0 | 0 | 0 | 0 | 0 | 0 | 0 | 0 |
| 80.5210 | -0.6390 | -3.1180 | C | 0 | 0 | 0 | 0 | 0 | 0 | 0 | 0 | 0 | 0 | 0 |
| 80.4950 | -0.3370 | -2.0620 | H | 0 | 0 | 0 | 0 | 0 | 0 | 0 | 0 | 0 | 0 | 0 |
| 80.2230 | -1.6910 | -3.1310 | H | 0 | 0 | 0 | 0 | 0 | 0 | 0 | 0 | 0 | 0 | 0 |
| 77.7340 | -1.1140 | -2.8310 | O | 0 | 0 | 0 | 0 | 0 | 0 | 0 | 0 | 0 | 0 | 0 |
| 76.1660 | 1.1120  | -1.1180 | C | 0 | 0 | 0 | 0 | 0 | 0 | 0 | 0 | 0 | 0 | 0 |
| 76.8420 | 0.3370  | -0.7400 | H | 0 | 0 | 0 | 0 | 0 | 0 | 0 | 0 | 0 | 0 | 0 |
| 76.6130 | 2.0530  | -0.7770 | H | 0 | 0 | 0 | 0 | 0 | 0 | 0 | 0 | 0 | 0 | 0 |
| 60.7460 | -0.6070 | -0.4600 | C | 0 | 0 | 0 | 0 | 0 | 0 | 0 | 0 | 0 | 0 | 0 |
| 61.4530 | -0.6560 | 0.3800  | H | 0 | 0 | 0 | 0 | 0 | 0 | 0 | 0 | 0 | 0 | 0 |
| 61.0200 | -1.4610 | -1.0950 | H | 0 | 0 | 0 | 0 | 0 | 0 | 0 | 0 | 0 | 0 | 0 |
| 60.9680 | 0.6960  | -1.2350 | C | 0 | 0 | 0 | 0 | 0 | 0 | 0 | 0 | 0 | 0 | 0 |
| 60.3180 | 0.7380  | -2.1150 | H | 0 | 0 | 0 | 0 | 0 | 0 | 0 | 0 | 0 | 0 | 0 |
| 60.7660 | 1.5630  | -0.5960 | H | 0 | 0 | 0 | 0 | 0 | 0 | 0 | 0 | 0 | 0 | 0 |
| 62.3910 | 0.7980  | -1.7180 | C | 0 | 0 | 0 | 0 | 0 | 0 | 0 | 0 | 0 | 0 | 0 |
| 62.5610 | 1.9860  | -2.3670 | O | 0 | 0 | 0 | 0 | 0 | 0 | 0 | 0 | 0 | 0 | 0 |
| 63.8530 | 2.2000  | -2.9520 | C | 0 | 0 | 0 | 0 | 0 | 0 | 0 | 0 | 0 | 0 | 0 |
| 64.2250 | 1.2880  | -3.4380 | H | 0 | 0 | 0 | 0 | 0 | 0 | 0 | 0 | 0 | 0 | 0 |
| 63.7290 | 2.9340  | -3.7560 | H | 0 | 0 | 0 | 0 | 0 | 0 | 0 | 0 | 0 | 0 | 0 |
| 64.8490 | 2.7280  | -1.9250 | C | 0 | 0 | 0 | 0 | 0 | 0 | 0 | 0 | 0 | 0 | 0 |
| 64.4530 | 3.6510  | -1.4820 | H | 0 | 0 | 0 | 0 | 0 | 0 | 0 | 0 | 0 | 0 | 0 |



|          |         |          |   |   |   |   |   |   |   |   |   |   |   |   |
|----------|---------|----------|---|---|---|---|---|---|---|---|---|---|---|---|
| 88.9000  | -3.1990 | -10.3870 | C | 0 | 0 | 0 | 0 | 0 | 0 | 0 | 0 | 0 | 0 | 0 |
| 90.1000  | -3.3450 | -11.0810 | C | 0 | 0 | 0 | 0 | 0 | 0 | 0 | 0 | 0 | 0 | 0 |
| 90.8070  | -4.1140 | -10.7810 | H | 0 | 0 | 0 | 0 | 0 | 0 | 0 | 0 | 0 | 0 | 0 |
| 90.4020  | -2.5150 | -12.1640 | C | 0 | 0 | 0 | 0 | 0 | 0 | 0 | 0 | 0 | 0 | 0 |
| 91.3500  | -2.6600 | -12.6790 | H | 0 | 0 | 0 | 0 | 0 | 0 | 0 | 0 | 0 | 0 | 0 |
| 89.5120  | -1.5080 | -12.5830 | C | 0 | 0 | 0 | 0 | 0 | 0 | 0 | 0 | 0 | 0 | 0 |
| 88.3080  | -1.3740 | -11.8720 | C | 0 | 0 | 0 | 0 | 0 | 0 | 0 | 0 | 0 | 0 | 0 |
| 87.5720  | -0.6230 | -12.1440 | H | 0 | 0 | 0 | 0 | 0 | 0 | 0 | 0 | 0 | 0 | 0 |
| 88.0050  | -2.2080 | -10.7870 | C | 0 | 0 | 0 | 0 | 0 | 0 | 0 | 0 | 0 | 0 | 0 |
| 87.0600  | -2.0520 | -10.2770 | H | 0 | 0 | 0 | 0 | 0 | 0 | 0 | 0 | 0 | 0 | 0 |
| 89.8760  | -0.6160 | -13.7930 | C | 0 | 0 | 0 | 0 | 0 | 0 | 0 | 0 | 0 | 0 | 0 |
| 91.2470  | 0.0740  | -13.5890 | C | 0 | 0 | 0 | 0 | 0 | 0 | 0 | 0 | 0 | 0 | 0 |
| 89.8220  | -1.5350 | -15.0440 | C | 0 | 0 | 0 | 0 | 0 | 0 | 0 | 0 | 0 | 0 | 0 |
| 90.5860  | -2.3210 | -15.0160 | H | 0 | 0 | 0 | 0 | 0 | 0 | 0 | 0 | 0 | 0 | 0 |
| 89.9680  | -0.9680 | -15.9710 | H | 0 | 0 | 0 | 0 | 0 | 0 | 0 | 0 | 0 | 0 | 0 |
| 88.8480  | -2.0340 | -15.1250 | H | 0 | 0 | 0 | 0 | 0 | 0 | 0 | 0 | 0 | 0 | 0 |
| 88.8560  | 0.5220  | -14.0590 | C | 0 | 0 | 0 | 0 | 0 | 0 | 0 | 0 | 0 | 0 | 0 |
| 87.8620  | 0.1270  | -14.3020 | H | 0 | 0 | 0 | 0 | 0 | 0 | 0 | 0 | 0 | 0 | 0 |
| 88.7440  | 1.1910  | -13.1970 | H | 0 | 0 | 0 | 0 | 0 | 0 | 0 | 0 | 0 | 0 | 0 |
| 89.1690  | 1.1440  | -14.9080 | H | 0 | 0 | 0 | 0 | 0 | 0 | 0 | 0 | 0 | 0 | 0 |
| 91.4890  | 0.8100  | -12.4140 | C | 0 | 0 | 0 | 0 | 0 | 0 | 0 | 0 | 0 | 0 | 0 |
| 90.7280  | 0.8790  | -11.6400 | H | 0 | 0 | 0 | 0 | 0 | 0 | 0 | 0 | 0 | 0 | 0 |
| 92.7060  | 1.4690  | -12.2090 | C | 0 | 0 | 0 | 0 | 0 | 0 | 0 | 0 | 0 | 0 | 0 |
| 92.8630  | 2.0280  | -11.2900 | H | 0 | 0 | 0 | 0 | 0 | 0 | 0 | 0 | 0 | 0 | 0 |
| 93.7120  | 1.4250  | -13.1740 | C | 0 | 0 | 0 | 0 | 0 | 0 | 0 | 0 | 0 | 0 | 0 |
| 93.4940  | 0.6940  | -14.3390 | C | 0 | 0 | 0 | 0 | 0 | 0 | 0 | 0 | 0 | 0 | 0 |
| 94.2490  | 0.6110  | -15.1130 | H | 0 | 0 | 0 | 0 | 0 | 0 | 0 | 0 | 0 | 0 | 0 |
| 92.2750  | 0.0300  | -14.5440 | C | 0 | 0 | 0 | 0 | 0 | 0 | 0 | 0 | 0 | 0 | 0 |
| 92.1580  | -0.5170 | -15.4760 | H | 0 | 0 | 0 | 0 | 0 | 0 | 0 | 0 | 0 | 0 | 0 |
| 94.8450  | 2.1150  | -12.8470 | O | 0 | 0 | 0 | 0 | 0 | 0 | 0 | 0 | 0 | 0 | 0 |
| 102.4570 | 3.7360  | -16.8930 | C | 0 | 0 | 0 | 0 | 0 | 0 | 0 | 0 | 0 | 0 | 0 |
| 102.2040 | 2.6700  | -16.9300 | H | 0 | 0 | 0 | 0 | 0 | 0 | 0 | 0 | 0 | 0 | 0 |
| 103.1960 | 3.8490  | -16.0900 | H | 0 | 0 | 0 | 0 | 0 | 0 | 0 | 0 | 0 | 0 | 0 |
| 103.1520 | 4.0700  | -18.2180 | C | 0 | 0 | 0 | 0 | 0 | 0 | 0 | 0 | 0 | 0 | 0 |
| 104.1670 | 3.6540  | -18.1740 | H | 0 | 0 | 0 | 0 | 0 | 0 | 0 | 0 | 0 | 0 | 0 |
| 102.6540 | 3.5420  | -19.0430 | H | 0 | 0 | 0 | 0 | 0 | 0 | 0 | 0 | 0 | 0 | 0 |
| 103.2510 | 5.5600  | -18.5410 | C | 0 | 0 | 0 | 0 | 0 | 0 | 0 | 0 | 0 | 0 | 0 |
| 103.4860 | 6.1440  | -17.6430 | H | 0 | 0 | 0 | 0 | 0 | 0 | 0 | 0 | 0 | 0 | 0 |
| 104.1060 | 5.6710  | -19.2210 | H | 0 | 0 | 0 | 0 | 0 | 0 | 0 | 0 | 0 | 0 | 0 |
| 101.2910 | 4.5430  | -16.5390 | N | 0 | 0 | 3 | 0 | 0 | 0 | 0 | 0 | 0 | 0 | 0 |
| 102.0460 | 6.0510  | -19.2250 | N | 0 | 0 | 3 | 0 | 0 | 0 | 0 | 0 | 0 | 0 | 0 |
| 100.4170 | 4.8720  | -17.6670 | C | 0 | 0 | 0 | 0 | 0 | 0 | 0 | 0 | 0 | 0 | 0 |
| 100.3230 | 4.0470  | -18.3840 | H | 0 | 0 | 0 | 0 | 0 | 0 | 0 | 0 | 0 | 0 | 0 |
| 99.4000  | 5.0710  | -17.3030 | H | 0 | 0 | 0 | 0 | 0 | 0 | 0 | 0 | 0 | 0 | 0 |
| 100.8760 | 6.1750  | -18.3460 | C | 0 | 0 | 0 | 0 | 0 | 0 | 0 | 0 | 0 | 0 | 0 |
| 101.0370 | 6.9380  | -17.5740 | H | 0 | 0 | 0 | 0 | 0 | 0 | 0 | 0 | 0 | 0 | 0 |
| 100.0300 | 6.5240  | -18.9520 | H | 0 | 0 | 0 | 0 | 0 | 0 | 0 | 0 | 0 | 0 | 0 |
| 109.0910 | 19.3540 | -28.9350 | C | 0 | 0 | 0 | 0 | 0 | 0 | 0 | 0 | 0 | 0 | 0 |
| 108.8140 | 19.5460 | -27.8930 | H | 0 | 0 | 0 | 0 | 0 | 0 | 0 | 0 | 0 | 0 | 0 |
| 108.1480 | 19.1530 | -29.4580 | H | 0 | 0 | 0 | 0 | 0 | 0 | 0 | 0 | 0 | 0 | 0 |
| 109.7180 | 20.5480 | -29.4310 | O | 0 | 0 | 0 | 0 | 0 | 0 | 0 | 0 | 0 | 0 | 0 |
| 109.6660 | 20.7340 | -30.7820 | C | 0 | 0 | 0 | 0 | 0 | 0 | 0 | 0 | 0 | 0 | 0 |
| 110.3390 | 22.0400 | -31.1310 | C | 0 | 0 | 0 | 0 | 0 | 0 | 0 | 0 | 0 | 0 | 0 |
| 109.8200 | 22.8490 | -30.6050 | H | 0 | 0 | 0 | 0 | 0 | 0 | 0 | 0 | 0 | 0 | 0 |
| 111.3780 | 21.9970 | -30.7880 | H | 0 | 0 | 0 | 0 | 0 | 0 | 0 | 0 | 0 | 0 | 0 |
| 110.3130 | 22.3140 | -32.6250 | C | 0 | 0 | 0 | 0 | 0 | 0 | 0 | 0 | 0 | 0 | 0 |
| 110.8300 | 21.5230 | -33.1780 | H | 0 | 0 | 0 | 0 | 0 | 0 | 0 | 0 | 0 | 0 | 0 |
| 110.8060 | 23.2650 | -32.8460 | H | 0 | 0 | 0 | 0 | 0 | 0 | 0 | 0 | 0 | 0 | 0 |
| 109.2850 | 22.3660 | -32.9970 | H | 0 | 0 | 0 | 0 | 0 | 0 | 0 | 0 | 0 | 0 | 0 |
| 109.1600 | 19.9600 | -31.5800 | O | 0 | 0 | 0 | 0 | 0 | 0 | 0 | 0 | 0 | 0 | 0 |
| 110.0400 | 18.1620 | -29.0240 | C | 0 | 0 | 0 | 0 | 0 | 0 | 0 | 0 | 0 | 0 | 0 |
| 110.2560 | 17.9580 | -30.0790 | H | 0 | 0 | 0 | 0 | 0 | 0 | 0 | 0 | 0 | 0 | 0 |
| 111.0200 | 18.3750 | -28.5800 | H | 0 | 0 | 0 | 0 | 0 | 0 | 0 | 0 | 0 | 0 | 0 |
| 102.3010 | 7.2970  | -19.9700 | C | 0 | 0 | 0 | 0 | 0 | 0 | 0 | 0 | 0 | 0 | 0 |
| 103.0620 | 7.0910  | -20.7360 | H | 0 | 0 | 0 | 0 | 0 | 0 | 0 | 0 | 0 | 0 | 0 |
| 101.4000 | 7.5560  | -20.5440 | H | 0 | 0 | 0 | 0 | 0 | 0 | 0 | 0 | 0 | 0 | 0 |
| 102.7380 | 8.5060  | -19.1370 | C | 0 | 0 | 0 | 0 | 0 | 0 | 0 | 0 | 0 | 0 | 0 |
| 101.9640 | 8.7720  | -18.4100 | H | 0 | 0 | 0 | 0 | 0 | 0 | 0 | 0 | 0 | 0 | 0 |
| 103.6740 | 8.2960  | -18.6080 | H | 0 | 0 | 0 | 0 | 0 | 0 | 0 | 0 | 0 | 0 | 0 |
| 102.9710 | 9.7110  | -20.0120 | C | 0 | 0 | 0 | 0 | 0 | 0 | 0 | 0 | 0 | 0 | 0 |
| 103.2550 | 10.7880 | -19.2250 | O | 0 | 0 | 0 | 0 | 0 | 0 | 0 | 0 | 0 | 0 | 0 |
| 103.4710 | 12.0290 | -19.9130 | C | 0 | 0 | 0 | 0 | 0 | 0 | 0 | 0 | 0 | 0 | 0 |
| 102.7470 | 12.1650 | -20.7260 | H | 0 | 0 | 0 | 0 | 0 | 0 | 0 | 0 | 0 | 0 | 0 |
| 103.2700 | 12.8360 | -19.1980 | H | 0 | 0 | 0 | 0 | 0 | 0 | 0 | 0 | 0 | 0 | 0 |
| 104.9050 | 12.1340 | -20.4180 | C | 0 | 0 | 0 | 0 | 0 | 0 | 0 | 0 | 0 | 0 | 0 |
| 105.5930 | 11.9860 | -19.5760 | H | 0 | 0 | 0 | 0 | 0 | 0 | 0 | 0 | 0 | 0 | 0 |
| 105.0920 | 11.3550 | -21.1670 | H | 0 | 0 | 0 | 0 | 0 | 0 | 0 | 0 | 0 | 0 | 0 |
| 102.9290 | 9.7210  | -21.2340 | O | 0 | 0 | 0 | 0 | 0 | 0 | 0 | 0 | 0 | 0 | 0 |
| 105.0780 | 13.4290 | -20.9900 | O | 0 | 0 | 0 | 0 | 0 | 0 | 0 | 0 | 0 | 0 | 0 |
| 106.3200 | 13.7380 | -21.4710 | C | 0 | 0 | 0 | 0 | 0 | 0 | 0 | 0 | 0 | 0 | 0 |
| 106.4500 | 15.0380 | -21.9580 | C | 0 | 0 | 0 | 0 | 0 | 0 | 0 | 0 | 0 | 0 | 0 |

|          |         |          |   |   |   |   |   |   |   |   |   |   |   |   |   |
|----------|---------|----------|---|---|---|---|---|---|---|---|---|---|---|---|---|
| 105.5980 | 15.7120 | -21.9350 | H | 0 | 0 | 0 | 0 | 0 | 0 | 0 | 0 | 0 | 0 | 0 | 0 |
| 107.6700 | 15.4860 | -22.4740 | C | 0 | 0 | 0 | 0 | 0 | 0 | 0 | 0 | 0 | 0 | 0 | 0 |
| 107.7310 | 16.5070 | -22.8450 | H | 0 | 0 | 0 | 0 | 0 | 0 | 0 | 0 | 0 | 0 | 0 | 0 |
| 108.7970 | 14.6420 | -22.5210 | C | 0 | 0 | 0 | 0 | 0 | 0 | 0 | 0 | 0 | 0 | 0 | 0 |
| 108.6460 | 13.3360 | -22.0280 | C | 0 | 0 | 0 | 0 | 0 | 0 | 0 | 0 | 0 | 0 | 0 | 0 |
| 109.4740 | 12.6330 | -22.0280 | H | 0 | 0 | 0 | 0 | 0 | 0 | 0 | 0 | 0 | 0 | 0 | 0 |
| 107.4230 | 12.8890 | -21.5100 | C | 0 | 0 | 0 | 0 | 0 | 0 | 0 | 0 | 0 | 0 | 0 | 0 |
| 107.3720 | 11.8670 | -21.1470 | H | 0 | 0 | 0 | 0 | 0 | 0 | 0 | 0 | 0 | 0 | 0 | 0 |
| 110.1320 | 15.1800 | -23.0860 | C | 0 | 0 | 0 | 0 | 0 | 0 | 0 | 0 | 0 | 0 | 0 | 0 |
| 109.9490 | 15.7360 | -24.5190 | C | 0 | 0 | 0 | 0 | 0 | 0 | 0 | 0 | 0 | 0 | 0 | 0 |
| 110.6450 | 16.2340 | -22.0690 | C | 0 | 0 | 0 | 0 | 0 | 0 | 0 | 0 | 0 | 0 | 0 | 0 |
| 109.9800 | 17.1030 | -21.9980 | H | 0 | 0 | 0 | 0 | 0 | 0 | 0 | 0 | 0 | 0 | 0 | 0 |
| 111.6420 | 16.6050 | -22.3370 | H | 0 | 0 | 0 | 0 | 0 | 0 | 0 | 0 | 0 | 0 | 0 | 0 |
| 110.7230 | 15.8060 | -21.0620 | H | 0 | 0 | 0 | 0 | 0 | 0 | 0 | 0 | 0 | 0 | 0 | 0 |
| 111.2480 | 14.1040 | -23.1780 | C | 0 | 0 | 0 | 0 | 0 | 0 | 0 | 0 | 0 | 0 | 0 | 0 |
| 111.5110 | 13.7080 | -22.1900 | H | 0 | 0 | 0 | 0 | 0 | 0 | 0 | 0 | 0 | 0 | 0 | 0 |
| 110.9580 | 13.2560 | -23.8090 | H | 0 | 0 | 0 | 0 | 0 | 0 | 0 | 0 | 0 | 0 | 0 | 0 |
| 112.1670 | 14.5240 | -23.6090 | H | 0 | 0 | 0 | 0 | 0 | 0 | 0 | 0 | 0 | 0 | 0 | 0 |
| 109.3640 | 14.9280 | -25.5120 | C | 0 | 0 | 0 | 0 | 0 | 0 | 0 | 0 | 0 | 0 | 0 | 0 |
| 109.0200 | 13.9230 | -25.2730 | H | 0 | 0 | 0 | 0 | 0 | 0 | 0 | 0 | 0 | 0 | 0 | 0 |
| 109.2080 | 15.3890 | -26.8230 | C | 0 | 0 | 0 | 0 | 0 | 0 | 0 | 0 | 0 | 0 | 0 | 0 |
| 108.7520 | 14.7410 | -27.5680 | H | 0 | 0 | 0 | 0 | 0 | 0 | 0 | 0 | 0 | 0 | 0 | 0 |
| 109.6390 | 16.6650 | -27.1870 | C | 0 | 0 | 0 | 0 | 0 | 0 | 0 | 0 | 0 | 0 | 0 | 0 |
| 110.2110 | 17.4820 | -26.2160 | C | 0 | 0 | 0 | 0 | 0 | 0 | 0 | 0 | 0 | 0 | 0 | 0 |
| 110.5470 | 18.4900 | -26.4390 | H | 0 | 0 | 0 | 0 | 0 | 0 | 0 | 0 | 0 | 0 | 0 | 0 |
| 110.3670 | 17.0220 | -24.8990 | C | 0 | 0 | 0 | 0 | 0 | 0 | 0 | 0 | 0 | 0 | 0 | 0 |
| 110.8280 | 17.7000 | -24.1870 | H | 0 | 0 | 0 | 0 | 0 | 0 | 0 | 0 | 0 | 0 | 0 | 0 |
| 109.4310 | 16.9840 | -28.4990 | O | 0 | 0 | 0 | 0 | 0 | 0 | 0 | 0 | 0 | 0 | 0 | 0 |
| 1        | 2       | 1        | 0 | 0 | 0 | 0 |   |   |   |   |   |   |   |   |   |
| 1        | 3       | 1        | 0 | 0 | 0 | 0 |   |   |   |   |   |   |   |   |   |
| 1        | 4       | 1        | 0 | 0 | 0 | 0 |   |   |   |   |   |   |   |   |   |
| 1        | 10      | 1        | 0 | 0 | 0 | 0 |   |   |   |   |   |   |   |   |   |
| 4        | 5       | 1        | 0 | 0 | 0 | 0 |   |   |   |   |   |   |   |   |   |
| 4        | 6       | 1        | 0 | 0 | 0 | 0 |   |   |   |   |   |   |   |   |   |
| 4        | 7       | 1        | 0 | 0 | 0 | 0 |   |   |   |   |   |   |   |   |   |
| 7        | 8       | 1        | 0 | 0 | 0 | 0 |   |   |   |   |   |   |   |   |   |
| 7        | 9       | 1        | 0 | 0 | 0 | 0 |   |   |   |   |   |   |   |   |   |
| 7        | 12      | 1        | 0 | 0 | 0 | 0 |   |   |   |   |   |   |   |   |   |
| 10       | 11      | 1        | 0 | 0 | 0 | 0 |   |   |   |   |   |   |   |   |   |
| 10       | 13      | 1        | 0 | 0 | 0 | 0 |   |   |   |   |   |   |   |   |   |
| 12       | 16      | 1        | 0 | 0 | 0 | 0 |   |   |   |   |   |   |   |   |   |
| 12       | 34      | 1        | 0 | 0 | 0 | 0 |   |   |   |   |   |   |   |   |   |
| 13       | 14      | 1        | 0 | 0 | 0 | 0 |   |   |   |   |   |   |   |   |   |
| 13       | 15      | 1        | 0 | 0 | 0 | 0 |   |   |   |   |   |   |   |   |   |
| 13       | 16      | 1        | 0 | 0 | 0 | 0 |   |   |   |   |   |   |   |   |   |
| 16       | 17      | 1        | 0 | 0 | 0 | 0 |   |   |   |   |   |   |   |   |   |
| 16       | 18      | 1        | 0 | 0 | 0 | 0 |   |   |   |   |   |   |   |   |   |
| 19       | 20      | 1        | 0 | 0 | 0 | 0 |   |   |   |   |   |   |   |   |   |
| 19       | 21      | 1        | 0 | 0 | 0 | 0 |   |   |   |   |   |   |   |   |   |
| 19       | 22      | 1        | 0 | 0 | 0 | 0 |   |   |   |   |   |   |   |   |   |
| 19       | 31      | 1        | 0 | 0 | 0 | 0 |   |   |   |   |   |   |   |   |   |
| 22       | 23      | 1        | 0 | 0 | 0 | 0 |   |   |   |   |   |   |   |   |   |
| 23       | 24      | 1        | 0 | 0 | 0 | 0 |   |   |   |   |   |   |   |   |   |
| 23       | 30      | 2        | 0 | 0 | 0 | 0 |   |   |   |   |   |   |   |   |   |
| 24       | 25      | 1        | 0 | 0 | 0 | 0 |   |   |   |   |   |   |   |   |   |
| 24       | 26      | 1        | 0 | 0 | 0 | 0 |   |   |   |   |   |   |   |   |   |
| 24       | 27      | 1        | 0 | 0 | 0 | 0 |   |   |   |   |   |   |   |   |   |
| 27       | 28      | 1        | 0 | 0 | 0 | 0 |   |   |   |   |   |   |   |   |   |
| 27       | 29      | 1        | 0 | 0 | 0 | 0 |   |   |   |   |   |   |   |   |   |
| 27       | 89      | 1        | 0 | 0 | 0 | 0 |   |   |   |   |   |   |   |   |   |
| 31       | 32      | 1        | 0 | 0 | 0 | 0 |   |   |   |   |   |   |   |   |   |
| 31       | 33      | 1        | 0 | 0 | 0 | 0 |   |   |   |   |   |   |   |   |   |
| 31       | 79      | 1        | 0 | 0 | 0 | 0 |   |   |   |   |   |   |   |   |   |
| 34       | 35      | 1        | 0 | 0 | 0 | 0 |   |   |   |   |   |   |   |   |   |
| 34       | 36      | 1        | 0 | 0 | 0 | 0 |   |   |   |   |   |   |   |   |   |
| 34       | 37      | 1        | 0 | 0 | 0 | 0 |   |   |   |   |   |   |   |   |   |
| 37       | 38      | 1        | 0 | 0 | 0 | 0 |   |   |   |   |   |   |   |   |   |
| 37       | 39      | 1        | 0 | 0 | 0 | 0 |   |   |   |   |   |   |   |   |   |
| 37       | 40      | 1        | 0 | 0 | 0 | 0 |   |   |   |   |   |   |   |   |   |
| 40       | 41      | 1        | 0 | 0 | 0 | 0 |   |   |   |   |   |   |   |   |   |
| 40       | 48      | 2        | 0 | 0 | 0 | 0 |   |   |   |   |   |   |   |   |   |
| 41       | 42      | 1        | 0 | 0 | 0 | 0 |   |   |   |   |   |   |   |   |   |
| 42       | 43      | 1        | 0 | 0 | 0 | 0 |   |   |   |   |   |   |   |   |   |
| 42       | 44      | 1        | 0 | 0 | 0 | 0 |   |   |   |   |   |   |   |   |   |
| 42       | 45      | 1        | 0 | 0 | 0 | 0 |   |   |   |   |   |   |   |   |   |
| 45       | 46      | 1        | 0 | 0 | 0 | 0 |   |   |   |   |   |   |   |   |   |
| 45       | 47      | 1        | 0 | 0 | 0 | 0 |   |   |   |   |   |   |   |   |   |
| 45       | 49      | 1        | 0 | 0 | 0 | 0 |   |   |   |   |   |   |   |   |   |
| 49       | 50      | 1        | 0 | 0 | 0 | 0 |   |   |   |   |   |   |   |   |   |
| 50       | 51      | 1        | 0 | 0 | 0 | 0 |   |   |   |   |   |   |   |   |   |
| 50       | 58      | 2        | 0 | 0 | 0 | 0 |   |   |   |   |   |   |   |   |   |

|     |     |   |   |   |   |   |
|-----|-----|---|---|---|---|---|
| 51  | 52  | 1 | 0 | 0 | 0 | 0 |
| 51  | 53  | 2 | 0 | 0 | 0 | 0 |
| 53  | 54  | 1 | 0 | 0 | 0 | 0 |
| 53  | 55  | 1 | 0 | 0 | 0 | 0 |
| 55  | 56  | 2 | 0 | 0 | 0 | 0 |
| 55  | 60  | 1 | 0 | 0 | 0 | 0 |
| 56  | 57  | 1 | 0 | 0 | 0 | 0 |
| 56  | 58  | 1 | 0 | 0 | 0 | 0 |
| 58  | 59  | 1 | 0 | 0 | 0 | 0 |
| 60  | 61  | 1 | 0 | 0 | 0 | 0 |
| 60  | 62  | 1 | 0 | 0 | 0 | 0 |
| 60  | 66  | 1 | 0 | 0 | 0 | 0 |
| 61  | 70  | 1 | 0 | 0 | 0 | 0 |
| 61  | 77  | 2 | 0 | 0 | 0 | 0 |
| 62  | 63  | 1 | 0 | 0 | 0 | 0 |
| 62  | 64  | 1 | 0 | 0 | 0 | 0 |
| 62  | 65  | 1 | 0 | 0 | 0 | 0 |
| 66  | 67  | 1 | 0 | 0 | 0 | 0 |
| 66  | 68  | 1 | 0 | 0 | 0 | 0 |
| 66  | 69  | 1 | 0 | 0 | 0 | 0 |
| 70  | 71  | 1 | 0 | 0 | 0 | 0 |
| 70  | 72  | 2 | 0 | 0 | 0 | 0 |
| 72  | 73  | 1 | 0 | 0 | 0 | 0 |
| 72  | 74  | 1 | 0 | 0 | 0 | 0 |
| 74  | 75  | 2 | 0 | 0 | 0 | 0 |
| 74  | 79  | 1 | 0 | 0 | 0 | 0 |
| 75  | 76  | 1 | 0 | 0 | 0 | 0 |
| 75  | 77  | 1 | 0 | 0 | 0 | 0 |
| 77  | 78  | 1 | 0 | 0 | 0 | 0 |
| 80  | 81  | 1 | 0 | 0 | 0 | 0 |
| 80  | 82  | 1 | 0 | 0 | 0 | 0 |
| 80  | 83  | 1 | 0 | 0 | 0 | 0 |
| 80  | 89  | 1 | 0 | 0 | 0 | 0 |
| 83  | 84  | 1 | 0 | 0 | 0 | 0 |
| 83  | 85  | 1 | 0 | 0 | 0 | 0 |
| 83  | 86  | 1 | 0 | 0 | 0 | 0 |
| 86  | 87  | 1 | 0 | 0 | 0 | 0 |
| 86  | 88  | 1 | 0 | 0 | 0 | 0 |
| 86  | 90  | 1 | 0 | 0 | 0 | 0 |
| 89  | 91  | 1 | 0 | 0 | 0 | 0 |
| 90  | 94  | 1 | 0 | 0 | 0 | 0 |
| 90  | 112 | 1 | 0 | 0 | 0 | 0 |
| 91  | 92  | 1 | 0 | 0 | 0 | 0 |
| 91  | 93  | 1 | 0 | 0 | 0 | 0 |
| 91  | 94  | 1 | 0 | 0 | 0 | 0 |
| 94  | 95  | 1 | 0 | 0 | 0 | 0 |
| 94  | 96  | 1 | 0 | 0 | 0 | 0 |
| 97  | 98  | 1 | 0 | 0 | 0 | 0 |
| 97  | 99  | 1 | 0 | 0 | 0 | 0 |
| 97  | 100 | 1 | 0 | 0 | 0 | 0 |
| 97  | 109 | 1 | 0 | 0 | 0 | 0 |
| 100 | 101 | 1 | 0 | 0 | 0 | 0 |
| 101 | 102 | 1 | 0 | 0 | 0 | 0 |
| 101 | 108 | 2 | 0 | 0 | 0 | 0 |
| 102 | 103 | 1 | 0 | 0 | 0 | 0 |
| 102 | 104 | 1 | 0 | 0 | 0 | 0 |
| 102 | 105 | 1 | 0 | 0 | 0 | 0 |
| 105 | 106 | 1 | 0 | 0 | 0 | 0 |
| 105 | 107 | 1 | 0 | 0 | 0 | 0 |
| 105 | 167 | 1 | 0 | 0 | 0 | 0 |
| 109 | 110 | 1 | 0 | 0 | 0 | 0 |
| 109 | 111 | 1 | 0 | 0 | 0 | 0 |
| 109 | 157 | 1 | 0 | 0 | 0 | 0 |
| 112 | 113 | 1 | 0 | 0 | 0 | 0 |
| 112 | 114 | 1 | 0 | 0 | 0 | 0 |
| 112 | 115 | 1 | 0 | 0 | 0 | 0 |
| 115 | 116 | 1 | 0 | 0 | 0 | 0 |
| 115 | 117 | 1 | 0 | 0 | 0 | 0 |
| 115 | 118 | 1 | 0 | 0 | 0 | 0 |
| 118 | 119 | 1 | 0 | 0 | 0 | 0 |
| 118 | 126 | 2 | 0 | 0 | 0 | 0 |
| 119 | 120 | 1 | 0 | 0 | 0 | 0 |
| 120 | 121 | 1 | 0 | 0 | 0 | 0 |
| 120 | 122 | 1 | 0 | 0 | 0 | 0 |
| 120 | 123 | 1 | 0 | 0 | 0 | 0 |
| 123 | 124 | 1 | 0 | 0 | 0 | 0 |
| 123 | 125 | 1 | 0 | 0 | 0 | 0 |
| 123 | 127 | 1 | 0 | 0 | 0 | 0 |
| 127 | 128 | 1 | 0 | 0 | 0 | 0 |
| 128 | 129 | 1 | 0 | 0 | 0 | 0 |
| 128 | 136 | 2 | 0 | 0 | 0 | 0 |

|        |   |   |   |   |   |
|--------|---|---|---|---|---|
| 129130 | 1 | 0 | 0 | 0 | 0 |
| 129131 | 2 | 0 | 0 | 0 | 0 |
| 131132 | 1 | 0 | 0 | 0 | 0 |
| 131133 | 1 | 0 | 0 | 0 | 0 |
| 133134 | 2 | 0 | 0 | 0 | 0 |
| 133138 | 1 | 0 | 0 | 0 | 0 |
| 134135 | 1 | 0 | 0 | 0 | 0 |
| 134136 | 1 | 0 | 0 | 0 | 0 |
| 136137 | 1 | 0 | 0 | 0 | 0 |
| 138139 | 1 | 0 | 0 | 0 | 0 |
| 138140 | 1 | 0 | 0 | 0 | 0 |
| 138144 | 1 | 0 | 0 | 0 | 0 |
| 139148 | 1 | 0 | 0 | 0 | 0 |
| 139155 | 2 | 0 | 0 | 0 | 0 |
| 140141 | 1 | 0 | 0 | 0 | 0 |
| 140142 | 1 | 0 | 0 | 0 | 0 |
| 140143 | 1 | 0 | 0 | 0 | 0 |
| 144145 | 1 | 0 | 0 | 0 | 0 |
| 144146 | 1 | 0 | 0 | 0 | 0 |
| 144147 | 1 | 0 | 0 | 0 | 0 |
| 148149 | 1 | 0 | 0 | 0 | 0 |
| 148150 | 2 | 0 | 0 | 0 | 0 |
| 150151 | 1 | 0 | 0 | 0 | 0 |
| 150152 | 1 | 0 | 0 | 0 | 0 |
| 152153 | 2 | 0 | 0 | 0 | 0 |
| 152157 | 1 | 0 | 0 | 0 | 0 |
| 153154 | 1 | 0 | 0 | 0 | 0 |
| 153155 | 1 | 0 | 0 | 0 | 0 |
| 155156 | 1 | 0 | 0 | 0 | 0 |
| 158159 | 1 | 0 | 0 | 0 | 0 |
| 158160 | 1 | 0 | 0 | 0 | 0 |
| 158161 | 1 | 0 | 0 | 0 | 0 |
| 158167 | 1 | 0 | 0 | 0 | 0 |
| 161162 | 1 | 0 | 0 | 0 | 0 |
| 161163 | 1 | 0 | 0 | 0 | 0 |
| 161164 | 1 | 0 | 0 | 0 | 0 |
| 164165 | 1 | 0 | 0 | 0 | 0 |
| 164166 | 1 | 0 | 0 | 0 | 0 |
| 164168 | 1 | 0 | 0 | 0 | 0 |
| 167169 | 1 | 0 | 0 | 0 | 0 |
| 168172 | 1 | 0 | 0 | 0 | 0 |
| 168190 | 1 | 0 | 0 | 0 | 0 |
| 169170 | 1 | 0 | 0 | 0 | 0 |
| 169171 | 1 | 0 | 0 | 0 | 0 |
| 169172 | 1 | 0 | 0 | 0 | 0 |
| 172173 | 1 | 0 | 0 | 0 | 0 |
| 172174 | 1 | 0 | 0 | 0 | 0 |
| 175176 | 1 | 0 | 0 | 0 | 0 |
| 175177 | 1 | 0 | 0 | 0 | 0 |
| 175178 | 1 | 0 | 0 | 0 | 0 |
| 175187 | 1 | 0 | 0 | 0 | 0 |
| 178179 | 1 | 0 | 0 | 0 | 0 |
| 179180 | 1 | 0 | 0 | 0 | 0 |
| 179186 | 2 | 0 | 0 | 0 | 0 |
| 180181 | 1 | 0 | 0 | 0 | 0 |
| 180182 | 1 | 0 | 0 | 0 | 0 |
| 180183 | 1 | 0 | 0 | 0 | 0 |
| 183184 | 1 | 0 | 0 | 0 | 0 |
| 183185 | 1 | 0 | 0 | 0 | 0 |
| 183245 | 1 | 0 | 0 | 0 | 0 |
| 187188 | 1 | 0 | 0 | 0 | 0 |
| 187189 | 1 | 0 | 0 | 0 | 0 |
| 187235 | 1 | 0 | 0 | 0 | 0 |
| 190191 | 1 | 0 | 0 | 0 | 0 |
| 190192 | 1 | 0 | 0 | 0 | 0 |
| 190193 | 1 | 0 | 0 | 0 | 0 |
| 193194 | 1 | 0 | 0 | 0 | 0 |
| 193195 | 1 | 0 | 0 | 0 | 0 |
| 193196 | 1 | 0 | 0 | 0 | 0 |
| 196197 | 1 | 0 | 0 | 0 | 0 |
| 196204 | 2 | 0 | 0 | 0 | 0 |
| 197198 | 1 | 0 | 0 | 0 | 0 |
| 198199 | 1 | 0 | 0 | 0 | 0 |
| 198200 | 1 | 0 | 0 | 0 | 0 |
| 198201 | 1 | 0 | 0 | 0 | 0 |
| 201202 | 1 | 0 | 0 | 0 | 0 |
| 201203 | 1 | 0 | 0 | 0 | 0 |
| 201205 | 1 | 0 | 0 | 0 | 0 |
| 205206 | 1 | 0 | 0 | 0 | 0 |
| 206207 | 1 | 0 | 0 | 0 | 0 |
| 206214 | 2 | 0 | 0 | 0 | 0 |

|        |   |   |   |   |   |
|--------|---|---|---|---|---|
| 207208 | 1 | 0 | 0 | 0 | 0 |
| 207209 | 2 | 0 | 0 | 0 | 0 |
| 209210 | 1 | 0 | 0 | 0 | 0 |
| 209211 | 1 | 0 | 0 | 0 | 0 |
| 211212 | 2 | 0 | 0 | 0 | 0 |
| 211216 | 1 | 0 | 0 | 0 | 0 |
| 212213 | 1 | 0 | 0 | 0 | 0 |
| 212214 | 1 | 0 | 0 | 0 | 0 |
| 214215 | 1 | 0 | 0 | 0 | 0 |
| 216217 | 1 | 0 | 0 | 0 | 0 |
| 216218 | 1 | 0 | 0 | 0 | 0 |
| 216222 | 1 | 0 | 0 | 0 | 0 |
| 217226 | 1 | 0 | 0 | 0 | 0 |
| 217233 | 2 | 0 | 0 | 0 | 0 |
| 218219 | 1 | 0 | 0 | 0 | 0 |
| 218220 | 1 | 0 | 0 | 0 | 0 |
| 218221 | 1 | 0 | 0 | 0 | 0 |
| 222223 | 1 | 0 | 0 | 0 | 0 |
| 222224 | 1 | 0 | 0 | 0 | 0 |
| 222225 | 1 | 0 | 0 | 0 | 0 |
| 226227 | 1 | 0 | 0 | 0 | 0 |
| 226228 | 2 | 0 | 0 | 0 | 0 |
| 228229 | 1 | 0 | 0 | 0 | 0 |
| 228230 | 1 | 0 | 0 | 0 | 0 |
| 230231 | 2 | 0 | 0 | 0 | 0 |
| 230235 | 1 | 0 | 0 | 0 | 0 |
| 231232 | 1 | 0 | 0 | 0 | 0 |
| 231233 | 1 | 0 | 0 | 0 | 0 |
| 233234 | 1 | 0 | 0 | 0 | 0 |
| 236237 | 1 | 0 | 0 | 0 | 0 |
| 236238 | 1 | 0 | 0 | 0 | 0 |
| 236239 | 1 | 0 | 0 | 0 | 0 |
| 236245 | 1 | 0 | 0 | 0 | 0 |
| 239240 | 1 | 0 | 0 | 0 | 0 |
| 239241 | 1 | 0 | 0 | 0 | 0 |
| 239242 | 1 | 0 | 0 | 0 | 0 |
| 242243 | 1 | 0 | 0 | 0 | 0 |
| 242244 | 1 | 0 | 0 | 0 | 0 |
| 242246 | 1 | 0 | 0 | 0 | 0 |
| 245247 | 1 | 0 | 0 | 0 | 0 |
| 246250 | 1 | 0 | 0 | 0 | 0 |
| 246268 | 1 | 0 | 0 | 0 | 0 |
| 247248 | 1 | 0 | 0 | 0 | 0 |
| 247249 | 1 | 0 | 0 | 0 | 0 |
| 247250 | 1 | 0 | 0 | 0 | 0 |
| 250251 | 1 | 0 | 0 | 0 | 0 |
| 250252 | 1 | 0 | 0 | 0 | 0 |
| 253254 | 1 | 0 | 0 | 0 | 0 |
| 253255 | 1 | 0 | 0 | 0 | 0 |
| 253256 | 1 | 0 | 0 | 0 | 0 |
| 253265 | 1 | 0 | 0 | 0 | 0 |
| 256257 | 1 | 0 | 0 | 0 | 0 |
| 257258 | 1 | 0 | 0 | 0 | 0 |
| 257264 | 2 | 0 | 0 | 0 | 0 |
| 258259 | 1 | 0 | 0 | 0 | 0 |
| 258260 | 1 | 0 | 0 | 0 | 0 |
| 258261 | 1 | 0 | 0 | 0 | 0 |
| 261262 | 1 | 0 | 0 | 0 | 0 |
| 261263 | 1 | 0 | 0 | 0 | 0 |
| 261323 | 1 | 0 | 0 | 0 | 0 |
| 265266 | 1 | 0 | 0 | 0 | 0 |
| 265267 | 1 | 0 | 0 | 0 | 0 |
| 265313 | 1 | 0 | 0 | 0 | 0 |
| 268269 | 1 | 0 | 0 | 0 | 0 |
| 268270 | 1 | 0 | 0 | 0 | 0 |
| 268271 | 1 | 0 | 0 | 0 | 0 |
| 271272 | 1 | 0 | 0 | 0 | 0 |
| 271273 | 1 | 0 | 0 | 0 | 0 |
| 271274 | 1 | 0 | 0 | 0 | 0 |
| 274275 | 1 | 0 | 0 | 0 | 0 |
| 274282 | 2 | 0 | 0 | 0 | 0 |
| 275276 | 1 | 0 | 0 | 0 | 0 |
| 276277 | 1 | 0 | 0 | 0 | 0 |
| 276278 | 1 | 0 | 0 | 0 | 0 |
| 276279 | 1 | 0 | 0 | 0 | 0 |
| 279280 | 1 | 0 | 0 | 0 | 0 |
| 279281 | 1 | 0 | 0 | 0 | 0 |
| 279283 | 1 | 0 | 0 | 0 | 0 |
| 283284 | 1 | 0 | 0 | 0 | 0 |
| 284285 | 1 | 0 | 0 | 0 | 0 |
| 284292 | 2 | 0 | 0 | 0 | 0 |

|        |   |   |   |   |   |
|--------|---|---|---|---|---|
| 285286 | 1 | 0 | 0 | 0 | 0 |
| 285287 | 2 | 0 | 0 | 0 | 0 |
| 287288 | 1 | 0 | 0 | 0 | 0 |
| 287289 | 1 | 0 | 0 | 0 | 0 |
| 289290 | 2 | 0 | 0 | 0 | 0 |
| 289294 | 1 | 0 | 0 | 0 | 0 |
| 290291 | 1 | 0 | 0 | 0 | 0 |
| 290292 | 1 | 0 | 0 | 0 | 0 |
| 292293 | 1 | 0 | 0 | 0 | 0 |
| 294295 | 1 | 0 | 0 | 0 | 0 |
| 294296 | 1 | 0 | 0 | 0 | 0 |
| 294300 | 1 | 0 | 0 | 0 | 0 |
| 295304 | 1 | 0 | 0 | 0 | 0 |
| 295311 | 2 | 0 | 0 | 0 | 0 |
| 296297 | 1 | 0 | 0 | 0 | 0 |
| 296298 | 1 | 0 | 0 | 0 | 0 |
| 296299 | 1 | 0 | 0 | 0 | 0 |
| 300301 | 1 | 0 | 0 | 0 | 0 |
| 300302 | 1 | 0 | 0 | 0 | 0 |
| 300303 | 1 | 0 | 0 | 0 | 0 |
| 304305 | 1 | 0 | 0 | 0 | 0 |
| 304306 | 2 | 0 | 0 | 0 | 0 |
| 306307 | 1 | 0 | 0 | 0 | 0 |
| 306308 | 1 | 0 | 0 | 0 | 0 |
| 308309 | 2 | 0 | 0 | 0 | 0 |
| 308313 | 1 | 0 | 0 | 0 | 0 |
| 309310 | 1 | 0 | 0 | 0 | 0 |
| 309311 | 1 | 0 | 0 | 0 | 0 |
| 311312 | 1 | 0 | 0 | 0 | 0 |
| 314315 | 1 | 0 | 0 | 0 | 0 |
| 314316 | 1 | 0 | 0 | 0 | 0 |
| 314317 | 1 | 0 | 0 | 0 | 0 |
| 314323 | 1 | 0 | 0 | 0 | 0 |
| 317318 | 1 | 0 | 0 | 0 | 0 |
| 317319 | 1 | 0 | 0 | 0 | 0 |
| 317320 | 1 | 0 | 0 | 0 | 0 |
| 320321 | 1 | 0 | 0 | 0 | 0 |
| 320322 | 1 | 0 | 0 | 0 | 0 |
| 320324 | 1 | 0 | 0 | 0 | 0 |
| 323325 | 1 | 0 | 0 | 0 | 0 |
| 324328 | 1 | 0 | 0 | 0 | 0 |
| 324347 | 1 | 0 | 0 | 0 | 0 |
| 325326 | 1 | 0 | 0 | 0 | 0 |
| 325327 | 1 | 0 | 0 | 0 | 0 |
| 325328 | 1 | 0 | 0 | 0 | 0 |
| 328329 | 1 | 0 | 0 | 0 | 0 |
| 328330 | 1 | 0 | 0 | 0 | 0 |
| 331332 | 1 | 0 | 0 | 0 | 0 |
| 331333 | 1 | 0 | 0 | 0 | 0 |
| 331334 | 1 | 0 | 0 | 0 | 0 |
| 331344 | 1 | 0 | 0 | 0 | 0 |
| 334335 | 1 | 0 | 0 | 0 | 0 |
| 335336 | 1 | 0 | 0 | 0 | 0 |
| 335343 | 2 | 0 | 0 | 0 | 0 |
| 336337 | 1 | 0 | 0 | 0 | 0 |
| 336338 | 1 | 0 | 0 | 0 | 0 |
| 336339 | 1 | 0 | 0 | 0 | 0 |
| 339340 | 1 | 0 | 0 | 0 | 0 |
| 339341 | 1 | 0 | 0 | 0 | 0 |
| 339342 | 1 | 0 | 0 | 0 | 0 |
| 344345 | 1 | 0 | 0 | 0 | 0 |
| 344346 | 1 | 0 | 0 | 0 | 0 |
| 344392 | 1 | 0 | 0 | 0 | 0 |
| 347348 | 1 | 0 | 0 | 0 | 0 |
| 347349 | 1 | 0 | 0 | 0 | 0 |
| 347350 | 1 | 0 | 0 | 0 | 0 |
| 350351 | 1 | 0 | 0 | 0 | 0 |
| 350352 | 1 | 0 | 0 | 0 | 0 |
| 350353 | 1 | 0 | 0 | 0 | 0 |
| 353354 | 1 | 0 | 0 | 0 | 0 |
| 353361 | 2 | 0 | 0 | 0 | 0 |
| 354355 | 1 | 0 | 0 | 0 | 0 |
| 355356 | 1 | 0 | 0 | 0 | 0 |
| 355357 | 1 | 0 | 0 | 0 | 0 |
| 355358 | 1 | 0 | 0 | 0 | 0 |
| 358359 | 1 | 0 | 0 | 0 | 0 |
| 358360 | 1 | 0 | 0 | 0 | 0 |
| 358362 | 1 | 0 | 0 | 0 | 0 |
| 362363 | 1 | 0 | 0 | 0 | 0 |
| 363364 | 1 | 0 | 0 | 0 | 0 |
| 363371 | 2 | 0 | 0 | 0 | 0 |



364365 1 0 0 0 0  
364366 2 0 0 0 0  
366367 1 0 0 0 0  
366368 1 0 0 0 0  
368369 2 0 0 0 0  
368373 1 0 0 0 0  
369370 1 0 0 0 0  
369371 1 0 0 0 0  
371372 1 0 0 0 0  
373374 1 0 0 0 0  
373375 1 0 0 0 0  
373379 1 0 0 0 0  
374383 1 0 0 0 0  
374390 2 0 0 0 0  
375376 1 0 0 0 0  
375377 1 0 0 0 0  
375378 1 0 0 0 0  
379380 1 0 0 0 0  
379381 1 0 0 0 0  
379382 1 0 0 0 0  
383384 1 0 0 0 0  
383385 2 0 0 0 0  
385386 1 0 0 0 0  
385387 1 0 0 0 0  
387388 2 0 0 0 0  
387392 1 0 0 0 0  
388389 1 0 0 0 0  
388390 1 0 0 0 0  
390391 1 0 0 0 0

M END  
> <NAME>  
D70\_1

\$\$\$  
D86\_1  
MOE2012 3D

427436 0 0 1 0 0 0 0 0 0999 V2000  
21.8590 9.4520 -6.6110 C 0 0 0 0 0 0 0 0 0 0 0 0 0 0 0 0  
22.2540 9.5830 -5.5940 H 0 0 0 0 0 0 0 0 0 0 0 0 0 0 0 0  
22.3850 10.1940 -7.2270 H 0 0 0 0 0 0 0 0 0 0 0 0 0 0 0 0  
22.1270 8.0790 -7.0800 N 0 0 0 0 0 0 0 0 0 0 0 0 0 0 0 0  
23.5330 7.7220 -6.7930 C 0 0 0 0 0 0 0 0 0 0 0 0 0 0 0 0  
24.2150 8.3220 -7.4100 H 0 0 0 0 0 0 0 0 0 0 0 0 0 0 0 0  
23.7570 7.9650 -5.7450 H 0 0 0 0 0 0 0 0 0 0 0 0 0 0 0 0  
23.8260 6.2180 -6.9770 C 0 0 0 0 0 0 0 0 0 0 0 0 0 0 0 0  
23.1460 5.6450 -6.3350 H 0 0 0 0 0 0 0 0 0 0 0 0 0 0 0 0  
23.6390 5.9260 -8.0150 H 0 0 0 0 0 0 0 0 0 0 0 0 0 0 0 0  
25.2170 5.9170 -6.6210 N 0 0 3 0 0 0 0 0 0 0 0 0 0 0 0 0  
25.8540 6.4210 -7.2390 H 0 0 0 0 0 0 0 0 0 0 0 0 0 0 0 0  
21.7990 7.9180 -8.5100 C 0 0 0 0 0 0 0 0 0 0 0 0 0 0 0 0  
21.4070 8.8420 -8.9560 H 0 0 0 0 0 0 0 0 0 0 0 0 0 0 0 0  
22.6860 7.6980 -9.1190 H 0 0 0 0 0 0 0 0 0 0 0 0 0 0 0 0  
20.3640 9.7910 -6.5410 C 0 0 0 0 0 0 0 0 0 0 0 0 0 0 0 0  
19.8930 9.7640 -7.5280 H 0 0 0 0 0 0 0 0 0 0 0 0 0 0 0 0  
19.8410 9.0910 -5.8810 H 0 0 0 0 0 0 0 0 0 0 0 0 0 0 0 0  
20.2050 11.1050 -6.0150 O 0 0 0 0 0 0 0 0 0 0 0 0 0 0 0 0  
19.2490 11.2810 -5.9700 H 0 0 0 0 0 0 0 0 0 0 0 0 0 0 0 0  
20.7620 6.8090 -8.7000 C 0 0 0 0 0 0 0 0 0 0 0 0 0 0 0 0  
21.1230 5.8560 -8.3010 H 0 0 0 0 0 0 0 0 0 0 0 0 0 0 0 0  
19.8210 7.0670 -8.2030 H 0 0 0 0 0 0 0 0 0 0 0 0 0 0 0 0  
20.5040 6.6380 -10.0900 O 0 0 0 0 0 0 0 0 0 0 0 0 0 0 0 0  
19.8280 5.9430 -10.1690 H 0 0 0 0 0 0 0 0 0 0 0 0 0 0 0 0  
31.5270 -9.9330 -6.9710 C 0 0 0 0 0 0 0 0 0 0 0 0 0 0 0 0  
31.2330 -9.4540 -7.9110 H 0 0 0 0 0 0 0 0 0 0 0 0 0 0 0 0  
30.7650 -9.6360 -6.2390 H 0 0 0 0 0 0 0 0 0 0 0 0 0 0 0 0  
31.5130 -11.3500 -7.2010 O 0 0 0 0 0 0 0 0 0 0 0 0 0 0 0 0  
31.2830 -12.1230 -6.1020 C 0 0 0 0 0 0 0 0 0 0 0 0 0 0 0 0  
31.3040 -13.5780 -6.4840 C 0 0 0 0 0 0 0 0 0 0 0 0 0 0 0 0  
30.2670 -13.8580 -6.7050 H 0 0 0 0 0 0 0 0 0 0 0 0 0 0 0 0  
31.8840 -13.7230 -7.4030 H 0 0 0 0 0 0 0 0 0 0 0 0 0 0 0 0  
31.8500 -14.4660 -5.3630 C 0 0 0 0 0 0 0 0 0 0 0 0 0 0 0 0  
31.5610 -14.1040 -4.3690 H 0 0 0 0 0 0 0 0 0 0 0 0 0 0 0 0  
31.3480 -15.4350 -5.4890 H 0 0 0 0 0 0 0 0 0 0 0 0 0 0 0 0  
31.0820 -11.7000 -4.9720 O 0 0 0 0 0 0 0 0 0 0 0 0 0 0 0 0  
32.9190 -9.4700 -6.5450 C 0 0 0 0 0 0 0 0 0 0 0 0 0 0 0 0  
33.2150 -10.0230 -5.6460 H 0 0 0 0 0 0 0 0 0 0 0 0 0 0 0 0  
33.6870 -9.7200 -7.2860 H 0 0 0 0 0 0 0 0 0 0 0 0 0 0 0 0  
25.5130 4.4820 -6.6560 C 0 0 0 0 0 0 0 0 0 0 0 0 0 0 0 0  
26.4700 4.3340 -6.1420 H 0 0 0 0 0 0 0 0 0 0 0 0 0 0 0 0  
24.7720 3.9270 -6.0680 H 0 0 0 0 0 0 0 0 0 0 0 0 0 0 0 0





|         |         |         |   |   |   |   |   |   |   |   |   |   |   |   |   |   |
|---------|---------|---------|---|---|---|---|---|---|---|---|---|---|---|---|---|---|
| 68.6940 | -0.5180 | -3.8870 | H | 0 | 0 | 0 | 0 | 0 | 0 | 0 | 0 | 0 | 0 | 0 | 0 | 0 |
| 65.5360 | -0.9990 | -5.1150 | O | 0 | 0 | 0 | 0 | 0 | 0 | 0 | 0 | 0 | 0 | 0 | 0 | 0 |
| 64.1640 | 1.8710  | -4.7360 | C | 0 | 0 | 0 | 0 | 0 | 0 | 0 | 0 | 0 | 0 | 0 | 0 | 0 |
| 63.6670 | 0.9090  | -4.9050 | H | 0 | 0 | 0 | 0 | 0 | 0 | 0 | 0 | 0 | 0 | 0 | 0 | 0 |
| 63.9520 | 2.2030  | -3.7120 | H | 0 | 0 | 0 | 0 | 0 | 0 | 0 | 0 | 0 | 0 | 0 | 0 | 0 |
| 50.1820 | -3.7890 | -4.1120 | C | 0 | 0 | 0 | 0 | 0 | 0 | 0 | 0 | 0 | 0 | 0 | 0 | 0 |
| 50.7630 | -3.5110 | -3.2220 | H | 0 | 0 | 0 | 0 | 0 | 0 | 0 | 0 | 0 | 0 | 0 | 0 | 0 |
| 50.6900 | -4.6570 | -4.5540 | H | 0 | 0 | 0 | 0 | 0 | 0 | 0 | 0 | 0 | 0 | 0 | 0 | 0 |
| 50.2360 | -2.6580 | -5.1450 | C | 0 | 0 | 0 | 0 | 0 | 0 | 0 | 0 | 0 | 0 | 0 | 0 | 0 |
| 49.6460 | -2.9370 | -6.0250 | H | 0 | 0 | 0 | 0 | 0 | 0 | 0 | 0 | 0 | 0 | 0 | 0 | 0 |
| 49.8550 | -1.7200 | -4.7310 | H | 0 | 0 | 0 | 0 | 0 | 0 | 0 | 0 | 0 | 0 | 0 | 0 | 0 |
| 51.6580 | -2.4080 | -5.5790 | C | 0 | 0 | 0 | 0 | 0 | 0 | 0 | 0 | 0 | 0 | 0 | 0 | 0 |
| 51.6750 | -1.6770 | -6.7300 | O | 0 | 0 | 0 | 0 | 0 | 0 | 0 | 0 | 0 | 0 | 0 | 0 | 0 |
| 52.9710 | -1.4230 | -7.2960 | C | 0 | 0 | 0 | 0 | 0 | 0 | 0 | 0 | 0 | 0 | 0 | 0 | 0 |
| 53.6010 | -2.3210 | -7.2570 | H | 0 | 0 | 0 | 0 | 0 | 0 | 0 | 0 | 0 | 0 | 0 | 0 | 0 |
| 52.8230 | -1.2090 | -8.3610 | H | 0 | 0 | 0 | 0 | 0 | 0 | 0 | 0 | 0 | 0 | 0 | 0 | 0 |
| 53.6490 | -0.2370 | -6.6210 | C | 0 | 0 | 0 | 0 | 0 | 0 | 0 | 0 | 0 | 0 | 0 | 0 | 0 |
| 52.9810 | 0.6310  | -6.6690 | H | 0 | 0 | 0 | 0 | 0 | 0 | 0 | 0 | 0 | 0 | 0 | 0 | 0 |
| 53.8460 | -0.4740 | -5.5690 | H | 0 | 0 | 0 | 0 | 0 | 0 | 0 | 0 | 0 | 0 | 0 | 0 | 0 |
| 52.6500 | -2.7810 | -4.9690 | O | 0 | 0 | 0 | 0 | 0 | 0 | 0 | 0 | 0 | 0 | 0 | 0 | 0 |
| 54.8700 | 0.0260  | -7.3090 | O | 0 | 0 | 0 | 0 | 0 | 0 | 0 | 0 | 0 | 0 | 0 | 0 | 0 |
| 55.6000 | 1.1020  | -6.8850 | C | 0 | 0 | 0 | 0 | 0 | 0 | 0 | 0 | 0 | 0 | 0 | 0 | 0 |
| 56.7240 | 1.3880  | -7.6570 | C | 0 | 0 | 0 | 0 | 0 | 0 | 0 | 0 | 0 | 0 | 0 | 0 | 0 |
| 56.9610 | 0.7710  | -8.5200 | H | 0 | 0 | 0 | 0 | 0 | 0 | 0 | 0 | 0 | 0 | 0 | 0 | 0 |
| 57.5530 | 2.4670  | -7.3340 | C | 0 | 0 | 0 | 0 | 0 | 0 | 0 | 0 | 0 | 0 | 0 | 0 | 0 |
| 58.4190 | 2.6600  | -7.9640 | H | 0 | 0 | 0 | 0 | 0 | 0 | 0 | 0 | 0 | 0 | 0 | 0 | 0 |
| 57.2850 | 3.2850  | -6.2190 | C | 0 | 0 | 0 | 0 | 0 | 0 | 0 | 0 | 0 | 0 | 0 | 0 | 0 |
| 56.1500 | 2.9810  | -5.4520 | C | 0 | 0 | 0 | 0 | 0 | 0 | 0 | 0 | 0 | 0 | 0 | 0 | 0 |
| 55.8770 | 3.5750  | -4.5840 | H | 0 | 0 | 0 | 0 | 0 | 0 | 0 | 0 | 0 | 0 | 0 | 0 | 0 |
| 55.3180 | 1.9010  | -5.7790 | C | 0 | 0 | 0 | 0 | 0 | 0 | 0 | 0 | 0 | 0 | 0 | 0 | 0 |
| 54.4580 | 1.7160  | -5.1440 | H | 0 | 0 | 0 | 0 | 0 | 0 | 0 | 0 | 0 | 0 | 0 | 0 | 0 |
| 58.2160 | 4.4780  | -5.9050 | C | 0 | 0 | 0 | 0 | 0 | 0 | 0 | 0 | 0 | 0 | 0 | 0 | 0 |
| 59.6960 | 4.0300  | -5.8490 | C | 0 | 0 | 0 | 0 | 0 | 0 | 0 | 0 | 0 | 0 | 0 | 0 | 0 |
| 57.9300 | 5.5480  | -6.9940 | C | 0 | 0 | 0 | 0 | 0 | 0 | 0 | 0 | 0 | 0 | 0 | 0 | 0 |
| 58.1870 | 5.1960  | -8.0000 | H | 0 | 0 | 0 | 0 | 0 | 0 | 0 | 0 | 0 | 0 | 0 | 0 | 0 |
| 58.4940 | 6.4710  | -6.8120 | H | 0 | 0 | 0 | 0 | 0 | 0 | 0 | 0 | 0 | 0 | 0 | 0 | 0 |
| 56.8670 | 5.8190  | -7.0110 | H | 0 | 0 | 0 | 0 | 0 | 0 | 0 | 0 | 0 | 0 | 0 | 0 | 0 |
| 57.9140 | 5.1660  | -4.5470 | C | 0 | 0 | 0 | 0 | 0 | 0 | 0 | 0 | 0 | 0 | 0 | 0 | 0 |
| 56.9130 | 5.6130  | -4.5320 | H | 0 | 0 | 0 | 0 | 0 | 0 | 0 | 0 | 0 | 0 | 0 | 0 | 0 |
| 57.9740 | 4.4670  | -3.7040 | H | 0 | 0 | 0 | 0 | 0 | 0 | 0 | 0 | 0 | 0 | 0 | 0 | 0 |
| 58.6280 | 5.9750  | -4.3460 | H | 0 | 0 | 0 | 0 | 0 | 0 | 0 | 0 | 0 | 0 | 0 | 0 | 0 |
| 60.0820 | 3.0050  | -4.9620 | C | 0 | 0 | 0 | 0 | 0 | 0 | 0 | 0 | 0 | 0 | 0 | 0 | 0 |
| 59.3390 | 2.5220  | -4.3290 | H | 0 | 0 | 0 | 0 | 0 | 0 | 0 | 0 | 0 | 0 | 0 | 0 | 0 |
| 61.4110 | 2.5740  | -4.8710 | C | 0 | 0 | 0 | 0 | 0 | 0 | 0 | 0 | 0 | 0 | 0 | 0 | 0 |
| 61.6420 | 1.7790  | -4.1700 | H | 0 | 0 | 0 | 0 | 0 | 0 | 0 | 0 | 0 | 0 | 0 | 0 | 0 |
| 62.3910 | 3.1590  | -5.6690 | C | 0 | 0 | 0 | 0 | 0 | 0 | 0 | 0 | 0 | 0 | 0 | 0 | 0 |
| 62.0250 | 4.1710  | -6.5560 | C | 0 | 0 | 0 | 0 | 0 | 0 | 0 | 0 | 0 | 0 | 0 | 0 | 0 |
| 62.7800 | 4.6330  | -7.1870 | H | 0 | 0 | 0 | 0 | 0 | 0 | 0 | 0 | 0 | 0 | 0 | 0 | 0 |
| 60.6970 | 4.6050  | -6.6450 | C | 0 | 0 | 0 | 0 | 0 | 0 | 0 | 0 | 0 | 0 | 0 | 0 | 0 |
| 60.4780 | 5.4010  | -7.3510 | H | 0 | 0 | 0 | 0 | 0 | 0 | 0 | 0 | 0 | 0 | 0 | 0 | 0 |
| 63.7190 | 2.8370  | -5.6840 | O | 0 | 0 | 0 | 0 | 0 | 0 | 0 | 0 | 0 | 0 | 0 | 0 | 0 |
| 73.9280 | -1.7760 | -1.4180 | C | 0 | 0 | 0 | 0 | 0 | 0 | 0 | 0 | 0 | 0 | 0 | 0 | 0 |
| 73.4980 | -1.0160 | -0.7520 | H | 0 | 0 | 0 | 0 | 0 | 0 | 0 | 0 | 0 | 0 | 0 | 0 | 0 |
| 74.0320 | -2.6800 | -0.8030 | H | 0 | 0 | 0 | 0 | 0 | 0 | 0 | 0 | 0 | 0 | 0 | 0 | 0 |
| 73.0130 | -2.0070 | -2.5550 | N | 0 | 0 | 0 | 0 | 0 | 0 | 0 | 0 | 0 | 0 | 0 | 0 | 0 |
| 71.6460 | -2.2720 | -2.0500 | C | 0 | 0 | 0 | 0 | 0 | 0 | 0 | 0 | 0 | 0 | 0 | 0 | 0 |
| 71.5940 | -3.2710 | -1.6020 | H | 0 | 0 | 0 | 0 | 0 | 0 | 0 | 0 | 0 | 0 | 0 | 0 | 0 |
| 71.4090 | -1.5520 | -1.2540 | H | 0 | 0 | 0 | 0 | 0 | 0 | 0 | 0 | 0 | 0 | 0 | 0 | 0 |
| 70.5790 | -2.0820 | -3.1550 | C | 0 | 0 | 0 | 0 | 0 | 0 | 0 | 0 | 0 | 0 | 0 | 0 | 0 |
| 70.7610 | -1.0900 | -3.5890 | H | 0 | 0 | 0 | 0 | 0 | 0 | 0 | 0 | 0 | 0 | 0 | 0 | 0 |
| 70.7090 | -2.8060 | -3.9690 | H | 0 | 0 | 0 | 0 | 0 | 0 | 0 | 0 | 0 | 0 | 0 | 0 | 0 |
| 69.1900 | -2.1370 | -2.6370 | N | 0 | 0 | 3 | 0 | 0 | 0 | 0 | 0 | 0 | 0 | 0 | 0 | 0 |
| 73.4870 | -3.0970 | -3.4300 | C | 0 | 0 | 0 | 0 | 0 | 0 | 0 | 0 | 0 | 0 | 0 | 0 | 0 |
| 74.2730 | -3.6990 | -2.9540 | H | 0 | 0 | 0 | 0 | 0 | 0 | 0 | 0 | 0 | 0 | 0 | 0 | 0 |
| 72.6970 | -3.8300 | -3.6460 | H | 0 | 0 | 0 | 0 | 0 | 0 | 0 | 0 | 0 | 0 | 0 | 0 | 0 |
| 75.3170 | -1.2650 | -1.8250 | C | 0 | 0 | 0 | 0 | 0 | 0 | 0 | 0 | 0 | 0 | 0 | 0 | 0 |
| 75.8720 | -2.0180 | -2.3940 | H | 0 | 0 | 0 | 0 | 0 | 0 | 0 | 0 | 0 | 0 | 0 | 0 | 0 |
| 75.2330 | -0.3530 | -2.4260 | H | 0 | 0 | 0 | 0 | 0 | 0 | 0 | 0 | 0 | 0 | 0 | 0 | 0 |
| 76.0720 | -0.9600 | -0.6560 | O | 0 | 0 | 0 | 0 | 0 | 0 | 0 | 0 | 0 | 0 | 0 | 0 | 0 |
| 76.9400 | -0.6330 | -0.9520 | H | 0 | 0 | 0 | 0 | 0 | 0 | 0 | 0 | 0 | 0 | 0 | 0 | 0 |
| 73.9900 | -2.5450 | -4.7670 | C | 0 | 0 | 0 | 0 | 0 | 0 | 0 | 0 | 0 | 0 | 0 | 0 | 0 |
| 73.1760 | -2.0640 | -5.3190 | H | 0 | 0 | 0 | 0 | 0 | 0 | 0 | 0 | 0 | 0 | 0 | 0 | 0 |
| 74.7940 | -1.8180 | -4.6220 | H | 0 | 0 | 0 | 0 | 0 | 0 | 0 | 0 | 0 | 0 | 0 | 0 | 0 |
| 74.4990 | -3.6150 | -5.5580 | O | 0 | 0 | 0 | 0 | 0 | 0 | 0 | 0 | 0 | 0 | 0 | 0 | 0 |
| 74.8510 | -3.2240 | -6.3760 | H | 0 | 0 | 0 | 0 | 0 | 0 | 0 | 0 | 0 | 0 | 0 | 0 | 0 |
| 77.0280 | -6.2110 | 11.9610 | C | 0 | 0 | 0 | 0 | 0 | 0 | 0 | 0 | 0 | 0 | 0 | 0 | 0 |
| 76.8010 | -6.3470 | 13.0260 | H | 0 | 0 | 0 | 0 | 0 | 0 | 0 | 0 | 0 | 0 | 0 | 0 | 0 |
| 77.6180 | -5.2930 | 11.8500 | H | 0 | 0 | 0 | 0 | 0 | 0 | 0 | 0 | 0 | 0 | 0 | 0 | 0 |
| 77.7680 | -7.3370 | 11.4740 | O | 0 | 0 | 0 | 0 | 0 | 0 | 0 | 0 | 0 | 0 | 0 | 0 | 0 |
| 78.9710 | -7.5240 | 12.0830 | C | 0 | 0 | 0 | 0 | 0 | 0 | 0 | 0 | 0 | 0 | 0 | 0 | 0 |
| 79.6640 | -8.7370 | 11.5270 | C | 0 | 0 | 0 | 0 | 0 | 0 | 0 | 0 | 0 | 0 | 0 | 0 | 0 |

|         |          |         |   |   |   |   |   |   |   |   |   |   |   |   |   |   |
|---------|----------|---------|---|---|---|---|---|---|---|---|---|---|---|---|---|---|
| 79.7480 | -9.4790  | 12.3280 | H | 0 | 0 | 0 | 0 | 0 | 0 | 0 | 0 | 0 | 0 | 0 | 0 | 0 |
| 79.0500 | -9.1820  | 10.7360 | H | 0 | 0 | 0 | 0 | 0 | 0 | 0 | 0 | 0 | 0 | 0 | 0 | 0 |
| 81.0280 | -8.3230  | 10.9860 | C | 0 | 0 | 0 | 0 | 0 | 0 | 0 | 0 | 0 | 0 | 0 | 0 | 0 |
| 81.6320 | -7.8880  | 11.7930 | H | 0 | 0 | 0 | 0 | 0 | 0 | 0 | 0 | 0 | 0 | 0 | 0 | 0 |
| 80.9000 | -7.4940  | 10.2760 | H | 0 | 0 | 0 | 0 | 0 | 0 | 0 | 0 | 0 | 0 | 0 | 0 | 0 |
| 79.4440 | -6.8110  | 12.9580 | O | 0 | 0 | 0 | 0 | 0 | 0 | 0 | 0 | 0 | 0 | 0 | 0 | 0 |
| 75.7340 | -6.0900  | 11.1670 | C | 0 | 0 | 0 | 0 | 0 | 0 | 0 | 0 | 0 | 0 | 0 | 0 | 0 |
| 75.9770 | -5.9090  | 10.1130 | H | 0 | 0 | 0 | 0 | 0 | 0 | 0 | 0 | 0 | 0 | 0 | 0 | 0 |
| 75.1750 | -7.0310  | 11.2450 | H | 0 | 0 | 0 | 0 | 0 | 0 | 0 | 0 | 0 | 0 | 0 | 0 | 0 |
| 68.7840 | -3.5220  | -2.3160 | C | 0 | 0 | 0 | 0 | 0 | 0 | 0 | 0 | 0 | 0 | 0 | 0 | 0 |
| 68.1430 | -3.9360  | -3.1040 | H | 0 | 0 | 0 | 0 | 0 | 0 | 0 | 0 | 0 | 0 | 0 | 0 | 0 |
| 69.6510 | -4.1930  | -2.2770 | H | 0 | 0 | 0 | 0 | 0 | 0 | 0 | 0 | 0 | 0 | 0 | 0 | 0 |
| 68.0570 | -3.6010  | -0.9730 | C | 0 | 0 | 0 | 0 | 0 | 0 | 0 | 0 | 0 | 0 | 0 | 0 | 0 |
| 67.2180 | -2.9020  | -0.9130 | H | 0 | 0 | 0 | 0 | 0 | 0 | 0 | 0 | 0 | 0 | 0 | 0 | 0 |
| 67.6310 | -4.6010  | -0.8330 | H | 0 | 0 | 0 | 0 | 0 | 0 | 0 | 0 | 0 | 0 | 0 | 0 | 0 |
| 69.0100 | -3.3610  | 0.1660  | C | 0 | 0 | 0 | 0 | 0 | 0 | 0 | 0 | 0 | 0 | 0 | 0 | 0 |
| 68.6970 | -2.2130  | 0.8260  | O | 0 | 0 | 0 | 0 | 0 | 0 | 0 | 0 | 0 | 0 | 0 | 0 | 0 |
| 69.6080 | -1.8250  | 1.8650  | C | 0 | 0 | 0 | 0 | 0 | 0 | 0 | 0 | 0 | 0 | 0 | 0 | 0 |
| 70.6500 | -1.9890  | 1.5630  | H | 0 | 0 | 0 | 0 | 0 | 0 | 0 | 0 | 0 | 0 | 0 | 0 | 0 |
| 69.5050 | -0.7420  | 2.0000  | H | 0 | 0 | 0 | 0 | 0 | 0 | 0 | 0 | 0 | 0 | 0 | 0 | 0 |
| 69.2850 | -2.5390  | 3.1710  | C | 0 | 0 | 0 | 0 | 0 | 0 | 0 | 0 | 0 | 0 | 0 | 0 | 0 |
| 68.2400 | -2.3420  | 3.4400  | H | 0 | 0 | 0 | 0 | 0 | 0 | 0 | 0 | 0 | 0 | 0 | 0 | 0 |
| 69.4180 | -3.6200  | 3.0450  | H | 0 | 0 | 0 | 0 | 0 | 0 | 0 | 0 | 0 | 0 | 0 | 0 | 0 |
| 69.9430 | -4.1040  | 0.4430  | O | 0 | 0 | 0 | 0 | 0 | 0 | 0 | 0 | 0 | 0 | 0 | 0 | 0 |
| 70.1680 | -2.0430  | 4.1750  | O | 0 | 0 | 0 | 0 | 0 | 0 | 0 | 0 | 0 | 0 | 0 | 0 | 0 |
| 69.9980 | -2.5210  | 5.4450  | C | 0 | 0 | 0 | 0 | 0 | 0 | 0 | 0 | 0 | 0 | 0 | 0 | 0 |
| 70.8090 | -1.9230  | 6.4080  | C | 0 | 0 | 0 | 0 | 0 | 0 | 0 | 0 | 0 | 0 | 0 | 0 | 0 |
| 71.5050 | -1.1410  | 6.1150  | H | 0 | 0 | 0 | 0 | 0 | 0 | 0 | 0 | 0 | 0 | 0 | 0 | 0 |
| 70.7320 | -2.3150  | 7.7470  | C | 0 | 0 | 0 | 0 | 0 | 0 | 0 | 0 | 0 | 0 | 0 | 0 | 0 |
| 71.3810 | -1.8230  | 8.4690  | H | 0 | 0 | 0 | 0 | 0 | 0 | 0 | 0 | 0 | 0 | 0 | 0 | 0 |
| 69.8410 | -3.3240  | 8.1610  | C | 0 | 0 | 0 | 0 | 0 | 0 | 0 | 0 | 0 | 0 | 0 | 0 | 0 |
| 69.0340 | -3.9180  | 7.1780  | C | 0 | 0 | 0 | 0 | 0 | 0 | 0 | 0 | 0 | 0 | 0 | 0 | 0 |
| 68.3220 | -4.6990  | 7.4270  | H | 0 | 0 | 0 | 0 | 0 | 0 | 0 | 0 | 0 | 0 | 0 | 0 | 0 |
| 69.1130 | -3.5230  | 5.8350  | C | 0 | 0 | 0 | 0 | 0 | 0 | 0 | 0 | 0 | 0 | 0 | 0 | 0 |
| 68.4670 | -4.0240  | 5.1220  | H | 0 | 0 | 0 | 0 | 0 | 0 | 0 | 0 | 0 | 0 | 0 | 0 | 0 |
| 69.7700 | -3.7150  | 9.6550  | C | 0 | 0 | 0 | 0 | 0 | 0 | 0 | 0 | 0 | 0 | 0 | 0 | 0 |
| 71.1740 | -4.0600  | 10.2030 | C | 0 | 0 | 0 | 0 | 0 | 0 | 0 | 0 | 0 | 0 | 0 | 0 | 0 |
| 69.0900 | -2.5250  | 10.3850 | C | 0 | 0 | 0 | 0 | 0 | 0 | 0 | 0 | 0 | 0 | 0 | 0 | 0 |
| 69.6830 | -1.6040  | 10.3220 | H | 0 | 0 | 0 | 0 | 0 | 0 | 0 | 0 | 0 | 0 | 0 | 0 | 0 |
| 68.9280 | -2.7410  | 11.4470 | H | 0 | 0 | 0 | 0 | 0 | 0 | 0 | 0 | 0 | 0 | 0 | 0 | 0 |
| 68.1080 | -2.3030  | 9.9480  | H | 0 | 0 | 0 | 0 | 0 | 0 | 0 | 0 | 0 | 0 | 0 | 0 | 0 |
| 68.8710 | -4.9500  | 9.9370  | C | 0 | 0 | 0 | 0 | 0 | 0 | 0 | 0 | 0 | 0 | 0 | 0 | 0 |
| 67.8250 | -4.7590  | 9.6690  | H | 0 | 0 | 0 | 0 | 0 | 0 | 0 | 0 | 0 | 0 | 0 | 0 | 0 |
| 69.1950 | -5.8370  | 9.3810  | H | 0 | 0 | 0 | 0 | 0 | 0 | 0 | 0 | 0 | 0 | 0 | 0 | 0 |
| 68.8850 | -5.2130  | 11.0020 | H | 0 | 0 | 0 | 0 | 0 | 0 | 0 | 0 | 0 | 0 | 0 | 0 | 0 |
| 71.9360 | -5.0710  | 9.5830  | C | 0 | 0 | 0 | 0 | 0 | 0 | 0 | 0 | 0 | 0 | 0 | 0 | 0 |
| 71.5430 | -5.5970  | 8.7140  | H | 0 | 0 | 0 | 0 | 0 | 0 | 0 | 0 | 0 | 0 | 0 | 0 | 0 |
| 73.2080 | -5.4220  | 10.0500 | C | 0 | 0 | 0 | 0 | 0 | 0 | 0 | 0 | 0 | 0 | 0 | 0 | 0 |
| 73.7430 | -6.2070  | 9.5260  | H | 0 | 0 | 0 | 0 | 0 | 0 | 0 | 0 | 0 | 0 | 0 | 0 | 0 |
| 73.7530 | -4.7680  | 11.1510 | C | 0 | 0 | 0 | 0 | 0 | 0 | 0 | 0 | 0 | 0 | 0 | 0 | 0 |
| 73.0150 | -3.7610  | 11.7730 | C | 0 | 0 | 0 | 0 | 0 | 0 | 0 | 0 | 0 | 0 | 0 | 0 | 0 |
| 73.4310 | -3.2410  | 12.6330 | H | 0 | 0 | 0 | 0 | 0 | 0 | 0 | 0 | 0 | 0 | 0 | 0 | 0 |
| 71.7410 | -3.4130  | 11.3110 | C | 0 | 0 | 0 | 0 | 0 | 0 | 0 | 0 | 0 | 0 | 0 | 0 | 0 |
| 71.2140 | -2.6250  | 11.8430 | H | 0 | 0 | 0 | 0 | 0 | 0 | 0 | 0 | 0 | 0 | 0 | 0 | 0 |
| 74.9800 | -5.0080  | 11.7060 | O | 0 | 0 | 0 | 0 | 0 | 0 | 0 | 0 | 0 | 0 | 0 | 0 | 0 |
| 79.6480 | -9.1800  | 5.8910  | C | 0 | 0 | 0 | 0 | 0 | 0 | 0 | 0 | 0 | 0 | 0 | 0 | 0 |
| 79.3970 | -10.2370 | 6.0530  | H | 0 | 0 | 0 | 0 | 0 | 0 | 0 | 0 | 0 | 0 | 0 | 0 | 0 |
| 78.7690 | -8.6140  | 6.2290  | H | 0 | 0 | 0 | 0 | 0 | 0 | 0 | 0 | 0 | 0 | 0 | 0 | 0 |
| 80.8450 | -8.8320  | 6.6810  | N | 0 | 0 | 0 | 0 | 0 | 0 | 0 | 0 | 0 | 0 | 0 | 0 | 0 |
| 80.6350 | -9.2500  | 8.0870  | C | 0 | 0 | 0 | 0 | 0 | 0 | 0 | 0 | 0 | 0 | 0 | 0 | 0 |
| 79.8580 | -8.6220  | 8.5390  | H | 0 | 0 | 0 | 0 | 0 | 0 | 0 | 0 | 0 | 0 | 0 | 0 | 0 |
| 80.2550 | -10.2800 | 8.1130  | H | 0 | 0 | 0 | 0 | 0 | 0 | 0 | 0 | 0 | 0 | 0 | 0 | 0 |
| 81.9400 | -9.2390  | 8.9220  | C | 0 | 0 | 0 | 0 | 0 | 0 | 0 | 0 | 0 | 0 | 0 | 0 | 0 |
| 82.5800 | -10.0330 | 8.5150  | H | 0 | 0 | 0 | 0 | 0 | 0 | 0 | 0 | 0 | 0 | 0 | 0 | 0 |
| 82.4950 | -8.3010  | 8.8020  | H | 0 | 0 | 0 | 0 | 0 | 0 | 0 | 0 | 0 | 0 | 0 | 0 | 0 |
| 81.6930 | -9.4860  | 10.3630 | N | 0 | 0 | 3 | 0 | 0 | 0 | 0 | 0 | 0 | 0 | 0 | 0 | 0 |
| 81.1380 | -7.3840  | 6.6120  | C | 0 | 0 | 0 | 0 | 0 | 0 | 0 | 0 | 0 | 0 | 0 | 0 | 0 |
| 80.3790 | -6.8280  | 6.0450  | H | 0 | 0 | 0 | 0 | 0 | 0 | 0 | 0 | 0 | 0 | 0 | 0 | 0 |
| 81.1120 | -6.9060  | 7.6010  | H | 0 | 0 | 0 | 0 | 0 | 0 | 0 | 0 | 0 | 0 | 0 | 0 | 0 |
| 79.8280 | -8.9980  | 4.3800  | C | 0 | 0 | 0 | 0 | 0 | 0 | 0 | 0 | 0 | 0 | 0 | 0 | 0 |
| 79.9800 | -7.9480  | 4.1150  | H | 0 | 0 | 0 | 0 | 0 | 0 | 0 | 0 | 0 | 0 | 0 | 0 | 0 |
| 80.6830 | -9.5710  | 4.0050  | H | 0 | 0 | 0 | 0 | 0 | 0 | 0 | 0 | 0 | 0 | 0 | 0 | 0 |
| 78.6530 | -9.4380  | 3.7050  | O | 0 | 0 | 0 | 0 | 0 | 0 | 0 | 0 | 0 | 0 | 0 | 0 | 0 |
| 78.7100 | -10.4050 | 3.6130  | H | 0 | 0 | 0 | 0 | 0 | 0 | 0 | 0 | 0 | 0 | 0 | 0 | 0 |
| 82.5100 | -7.1370  | 5.9850  | C | 0 | 0 | 0 | 0 | 0 | 0 | 0 | 0 | 0 | 0 | 0 | 0 | 0 |
| 83.2970 | -7.6640  | 6.5340  | H | 0 | 0 | 0 | 0 | 0 | 0 | 0 | 0 | 0 | 0 | 0 | 0 | 0 |
| 82.5290 | -7.4610  | 4.9390  | H | 0 | 0 | 0 | 0 | 0 | 0 | 0 | 0 | 0 | 0 | 0 | 0 | 0 |
| 82.7930 | -5.7430  | 6.0340  | O | 0 | 0 | 0 | 0 | 0 | 0 | 0 | 0 | 0 | 0 | 0 | 0 | 0 |
| 83.6720 | -5.6170  | 5.6370  | H | 0 | 0 | 0 | 0 | 0 | 0 | 0 | 0 | 0 | 0 | 0 | 0 | 0 |
| 96.5410 | -16.7120 | 17.3780 | C | 0 | 0 | 0 | 0 | 0 | 0 | 0 | 0 | 0 | 0 | 0 | 0 | 0 |
| 95.7520 | -16.3860 | 18.0640 | H | 0 | 0 | 0 | 0 | 0 | 0 | 0 | 0 | 0 | 0 | 0 | 0 | 0 |



|    |     |   |   |   |   |   |
|----|-----|---|---|---|---|---|
| 21 | 22  | 1 | 0 | 0 | 0 | 0 |
| 21 | 23  | 1 | 0 | 0 | 0 | 0 |
| 21 | 24  | 1 | 0 | 0 | 0 | 0 |
| 24 | 25  | 1 | 0 | 0 | 0 | 0 |
| 26 | 27  | 1 | 0 | 0 | 0 | 0 |
| 26 | 28  | 1 | 0 | 0 | 0 | 0 |
| 26 | 29  | 1 | 0 | 0 | 0 | 0 |
| 26 | 38  | 1 | 0 | 0 | 0 | 0 |
| 29 | 30  | 1 | 0 | 0 | 0 | 0 |
| 30 | 31  | 1 | 0 | 0 | 0 | 0 |
| 30 | 37  | 2 | 0 | 0 | 0 | 0 |
| 31 | 32  | 1 | 0 | 0 | 0 | 0 |
| 31 | 33  | 1 | 0 | 0 | 0 | 0 |
| 31 | 34  | 1 | 0 | 0 | 0 | 0 |
| 34 | 35  | 1 | 0 | 0 | 0 | 0 |
| 34 | 36  | 1 | 0 | 0 | 0 | 0 |
| 34 | 97  | 1 | 0 | 0 | 0 | 0 |
| 38 | 39  | 1 | 0 | 0 | 0 | 0 |
| 38 | 40  | 1 | 0 | 0 | 0 | 0 |
| 38 | 86  | 1 | 0 | 0 | 0 | 0 |
| 41 | 42  | 1 | 0 | 0 | 0 | 0 |
| 41 | 43  | 1 | 0 | 0 | 0 | 0 |
| 41 | 44  | 1 | 0 | 0 | 0 | 0 |
| 44 | 45  | 1 | 0 | 0 | 0 | 0 |
| 44 | 46  | 1 | 0 | 0 | 0 | 0 |
| 44 | 47  | 1 | 0 | 0 | 0 | 0 |
| 47 | 48  | 1 | 0 | 0 | 0 | 0 |
| 47 | 55  | 2 | 0 | 0 | 0 | 0 |
| 48 | 49  | 1 | 0 | 0 | 0 | 0 |
| 49 | 50  | 1 | 0 | 0 | 0 | 0 |
| 49 | 51  | 1 | 0 | 0 | 0 | 0 |
| 49 | 52  | 1 | 0 | 0 | 0 | 0 |
| 52 | 53  | 1 | 0 | 0 | 0 | 0 |
| 52 | 54  | 1 | 0 | 0 | 0 | 0 |
| 52 | 56  | 1 | 0 | 0 | 0 | 0 |
| 56 | 57  | 1 | 0 | 0 | 0 | 0 |
| 57 | 58  | 1 | 0 | 0 | 0 | 0 |
| 57 | 65  | 2 | 0 | 0 | 0 | 0 |
| 58 | 59  | 1 | 0 | 0 | 0 | 0 |
| 58 | 60  | 2 | 0 | 0 | 0 | 0 |
| 60 | 61  | 1 | 0 | 0 | 0 | 0 |
| 60 | 62  | 1 | 0 | 0 | 0 | 0 |
| 62 | 63  | 2 | 0 | 0 | 0 | 0 |
| 62 | 67  | 1 | 0 | 0 | 0 | 0 |
| 63 | 64  | 1 | 0 | 0 | 0 | 0 |
| 63 | 65  | 1 | 0 | 0 | 0 | 0 |
| 65 | 66  | 1 | 0 | 0 | 0 | 0 |
| 67 | 68  | 1 | 0 | 0 | 0 | 0 |
| 67 | 69  | 1 | 0 | 0 | 0 | 0 |
| 67 | 73  | 1 | 0 | 0 | 0 | 0 |
| 68 | 77  | 1 | 0 | 0 | 0 | 0 |
| 68 | 84  | 2 | 0 | 0 | 0 | 0 |
| 69 | 70  | 1 | 0 | 0 | 0 | 0 |
| 69 | 71  | 1 | 0 | 0 | 0 | 0 |
| 69 | 72  | 1 | 0 | 0 | 0 | 0 |
| 73 | 74  | 1 | 0 | 0 | 0 | 0 |
| 73 | 75  | 1 | 0 | 0 | 0 | 0 |
| 73 | 76  | 1 | 0 | 0 | 0 | 0 |
| 77 | 78  | 1 | 0 | 0 | 0 | 0 |
| 77 | 79  | 2 | 0 | 0 | 0 | 0 |
| 79 | 80  | 1 | 0 | 0 | 0 | 0 |
| 79 | 81  | 1 | 0 | 0 | 0 | 0 |
| 81 | 82  | 2 | 0 | 0 | 0 | 0 |
| 81 | 86  | 1 | 0 | 0 | 0 | 0 |
| 82 | 83  | 1 | 0 | 0 | 0 | 0 |
| 82 | 84  | 1 | 0 | 0 | 0 | 0 |
| 84 | 85  | 1 | 0 | 0 | 0 | 0 |
| 87 | 88  | 1 | 0 | 0 | 0 | 0 |
| 87 | 89  | 1 | 0 | 0 | 0 | 0 |
| 87 | 90  | 1 | 0 | 0 | 0 | 0 |
| 87 | 101 | 1 | 0 | 0 | 0 | 0 |
| 90 | 91  | 1 | 0 | 0 | 0 | 0 |
| 90 | 98  | 1 | 0 | 0 | 0 | 0 |
| 91 | 92  | 1 | 0 | 0 | 0 | 0 |
| 91 | 93  | 1 | 0 | 0 | 0 | 0 |
| 91 | 94  | 1 | 0 | 0 | 0 | 0 |
| 94 | 95  | 1 | 0 | 0 | 0 | 0 |
| 94 | 96  | 1 | 0 | 0 | 0 | 0 |
| 94 | 97  | 1 | 0 | 0 | 0 | 0 |
| 97 | 126 | 1 | 0 | 0 | 0 | 0 |
| 98 | 99  | 1 | 0 | 0 | 0 | 0 |

|        |   |   |   |   |   |
|--------|---|---|---|---|---|
| 98100  | 1 | 0 | 0 | 0 | 0 |
| 98106  | 1 | 0 | 0 | 0 | 0 |
| 101102 | 1 | 0 | 0 | 0 | 0 |
| 101103 | 1 | 0 | 0 | 0 | 0 |
| 101104 | 1 | 0 | 0 | 0 | 0 |
| 104105 | 1 | 0 | 0 | 0 | 0 |
| 106107 | 1 | 0 | 0 | 0 | 0 |
| 106108 | 1 | 0 | 0 | 0 | 0 |
| 106109 | 1 | 0 | 0 | 0 | 0 |
| 109110 | 1 | 0 | 0 | 0 | 0 |
| 111112 | 1 | 0 | 0 | 0 | 0 |
| 111113 | 1 | 0 | 0 | 0 | 0 |
| 111114 | 1 | 0 | 0 | 0 | 0 |
| 111123 | 1 | 0 | 0 | 0 | 0 |
| 114115 | 1 | 0 | 0 | 0 | 0 |
| 115116 | 1 | 0 | 0 | 0 | 0 |
| 115122 | 2 | 0 | 0 | 0 | 0 |
| 116117 | 1 | 0 | 0 | 0 | 0 |
| 116118 | 1 | 0 | 0 | 0 | 0 |
| 116119 | 1 | 0 | 0 | 0 | 0 |
| 119120 | 1 | 0 | 0 | 0 | 0 |
| 119121 | 1 | 0 | 0 | 0 | 0 |
| 119182 | 1 | 0 | 0 | 0 | 0 |
| 123124 | 1 | 0 | 0 | 0 | 0 |
| 123125 | 1 | 0 | 0 | 0 | 0 |
| 123171 | 1 | 0 | 0 | 0 | 0 |
| 126127 | 1 | 0 | 0 | 0 | 0 |
| 126128 | 1 | 0 | 0 | 0 | 0 |
| 126129 | 1 | 0 | 0 | 0 | 0 |
| 129130 | 1 | 0 | 0 | 0 | 0 |
| 129131 | 1 | 0 | 0 | 0 | 0 |
| 129132 | 1 | 0 | 0 | 0 | 0 |
| 132133 | 1 | 0 | 0 | 0 | 0 |
| 132140 | 2 | 0 | 0 | 0 | 0 |
| 133134 | 1 | 0 | 0 | 0 | 0 |
| 134135 | 1 | 0 | 0 | 0 | 0 |
| 134136 | 1 | 0 | 0 | 0 | 0 |
| 134137 | 1 | 0 | 0 | 0 | 0 |
| 137138 | 1 | 0 | 0 | 0 | 0 |
| 137139 | 1 | 0 | 0 | 0 | 0 |
| 137141 | 1 | 0 | 0 | 0 | 0 |
| 141142 | 1 | 0 | 0 | 0 | 0 |
| 142143 | 1 | 0 | 0 | 0 | 0 |
| 142150 | 2 | 0 | 0 | 0 | 0 |
| 143144 | 1 | 0 | 0 | 0 | 0 |
| 143145 | 2 | 0 | 0 | 0 | 0 |
| 145146 | 1 | 0 | 0 | 0 | 0 |
| 145147 | 1 | 0 | 0 | 0 | 0 |
| 147148 | 2 | 0 | 0 | 0 | 0 |
| 147152 | 1 | 0 | 0 | 0 | 0 |
| 148149 | 1 | 0 | 0 | 0 | 0 |
| 148150 | 1 | 0 | 0 | 0 | 0 |
| 150151 | 1 | 0 | 0 | 0 | 0 |
| 152153 | 1 | 0 | 0 | 0 | 0 |
| 152154 | 1 | 0 | 0 | 0 | 0 |
| 152158 | 1 | 0 | 0 | 0 | 0 |
| 153162 | 1 | 0 | 0 | 0 | 0 |
| 153169 | 2 | 0 | 0 | 0 | 0 |
| 154155 | 1 | 0 | 0 | 0 | 0 |
| 154156 | 1 | 0 | 0 | 0 | 0 |
| 154157 | 1 | 0 | 0 | 0 | 0 |
| 158159 | 1 | 0 | 0 | 0 | 0 |
| 158160 | 1 | 0 | 0 | 0 | 0 |
| 158161 | 1 | 0 | 0 | 0 | 0 |
| 162163 | 1 | 0 | 0 | 0 | 0 |
| 162164 | 2 | 0 | 0 | 0 | 0 |
| 164165 | 1 | 0 | 0 | 0 | 0 |
| 164166 | 1 | 0 | 0 | 0 | 0 |
| 166167 | 2 | 0 | 0 | 0 | 0 |
| 166171 | 1 | 0 | 0 | 0 | 0 |
| 167168 | 1 | 0 | 0 | 0 | 0 |
| 167169 | 1 | 0 | 0 | 0 | 0 |
| 169170 | 1 | 0 | 0 | 0 | 0 |
| 172173 | 1 | 0 | 0 | 0 | 0 |
| 172174 | 1 | 0 | 0 | 0 | 0 |
| 172175 | 1 | 0 | 0 | 0 | 0 |
| 172186 | 1 | 0 | 0 | 0 | 0 |
| 175176 | 1 | 0 | 0 | 0 | 0 |
| 175183 | 1 | 0 | 0 | 0 | 0 |
| 176177 | 1 | 0 | 0 | 0 | 0 |
| 176178 | 1 | 0 | 0 | 0 | 0 |



|        |   |   |   |   |   |
|--------|---|---|---|---|---|
| 176179 | 1 | 0 | 0 | 0 | 0 |
| 179180 | 1 | 0 | 0 | 0 | 0 |
| 179181 | 1 | 0 | 0 | 0 | 0 |
| 179182 | 1 | 0 | 0 | 0 | 0 |
| 182211 | 1 | 0 | 0 | 0 | 0 |
| 183184 | 1 | 0 | 0 | 0 | 0 |
| 183185 | 1 | 0 | 0 | 0 | 0 |
| 183191 | 1 | 0 | 0 | 0 | 0 |
| 186187 | 1 | 0 | 0 | 0 | 0 |
| 186188 | 1 | 0 | 0 | 0 | 0 |
| 186189 | 1 | 0 | 0 | 0 | 0 |
| 189190 | 1 | 0 | 0 | 0 | 0 |
| 191192 | 1 | 0 | 0 | 0 | 0 |
| 191193 | 1 | 0 | 0 | 0 | 0 |
| 191194 | 1 | 0 | 0 | 0 | 0 |
| 194195 | 1 | 0 | 0 | 0 | 0 |
| 196197 | 1 | 0 | 0 | 0 | 0 |
| 196198 | 1 | 0 | 0 | 0 | 0 |
| 196199 | 1 | 0 | 0 | 0 | 0 |
| 196208 | 1 | 0 | 0 | 0 | 0 |
| 199200 | 1 | 0 | 0 | 0 | 0 |
| 200201 | 1 | 0 | 0 | 0 | 0 |
| 200207 | 2 | 0 | 0 | 0 | 0 |
| 201202 | 1 | 0 | 0 | 0 | 0 |
| 201203 | 1 | 0 | 0 | 0 | 0 |
| 201204 | 1 | 0 | 0 | 0 | 0 |
| 204205 | 1 | 0 | 0 | 0 | 0 |
| 204206 | 1 | 0 | 0 | 0 | 0 |
| 204267 | 1 | 0 | 0 | 0 | 0 |
| 208209 | 1 | 0 | 0 | 0 | 0 |
| 208210 | 1 | 0 | 0 | 0 | 0 |
| 208256 | 1 | 0 | 0 | 0 | 0 |
| 211212 | 1 | 0 | 0 | 0 | 0 |
| 211213 | 1 | 0 | 0 | 0 | 0 |
| 211214 | 1 | 0 | 0 | 0 | 0 |
| 214215 | 1 | 0 | 0 | 0 | 0 |
| 214216 | 1 | 0 | 0 | 0 | 0 |
| 214217 | 1 | 0 | 0 | 0 | 0 |
| 217218 | 1 | 0 | 0 | 0 | 0 |
| 217225 | 2 | 0 | 0 | 0 | 0 |
| 218219 | 1 | 0 | 0 | 0 | 0 |
| 219220 | 1 | 0 | 0 | 0 | 0 |
| 219221 | 1 | 0 | 0 | 0 | 0 |
| 219222 | 1 | 0 | 0 | 0 | 0 |
| 222223 | 1 | 0 | 0 | 0 | 0 |
| 222224 | 1 | 0 | 0 | 0 | 0 |
| 222226 | 1 | 0 | 0 | 0 | 0 |
| 226227 | 1 | 0 | 0 | 0 | 0 |
| 227228 | 1 | 0 | 0 | 0 | 0 |
| 227235 | 2 | 0 | 0 | 0 | 0 |
| 228229 | 1 | 0 | 0 | 0 | 0 |
| 228230 | 2 | 0 | 0 | 0 | 0 |
| 230231 | 1 | 0 | 0 | 0 | 0 |
| 230232 | 1 | 0 | 0 | 0 | 0 |
| 232233 | 2 | 0 | 0 | 0 | 0 |
| 232237 | 1 | 0 | 0 | 0 | 0 |
| 233234 | 1 | 0 | 0 | 0 | 0 |
| 233235 | 1 | 0 | 0 | 0 | 0 |
| 235236 | 1 | 0 | 0 | 0 | 0 |
| 237238 | 1 | 0 | 0 | 0 | 0 |
| 237239 | 1 | 0 | 0 | 0 | 0 |
| 237243 | 1 | 0 | 0 | 0 | 0 |
| 238247 | 1 | 0 | 0 | 0 | 0 |
| 238254 | 2 | 0 | 0 | 0 | 0 |
| 239240 | 1 | 0 | 0 | 0 | 0 |
| 239241 | 1 | 0 | 0 | 0 | 0 |
| 239242 | 1 | 0 | 0 | 0 | 0 |
| 243244 | 1 | 0 | 0 | 0 | 0 |
| 243245 | 1 | 0 | 0 | 0 | 0 |
| 243246 | 1 | 0 | 0 | 0 | 0 |
| 247248 | 1 | 0 | 0 | 0 | 0 |
| 247249 | 2 | 0 | 0 | 0 | 0 |
| 249250 | 1 | 0 | 0 | 0 | 0 |
| 249251 | 1 | 0 | 0 | 0 | 0 |
| 251252 | 2 | 0 | 0 | 0 | 0 |
| 251256 | 1 | 0 | 0 | 0 | 0 |
| 252253 | 1 | 0 | 0 | 0 | 0 |
| 252254 | 1 | 0 | 0 | 0 | 0 |
| 254255 | 1 | 0 | 0 | 0 | 0 |
| 257258 | 1 | 0 | 0 | 0 | 0 |
| 257259 | 1 | 0 | 0 | 0 | 0 |

|        |   |   |   |   |   |
|--------|---|---|---|---|---|
| 257260 | 1 | 0 | 0 | 0 | 0 |
| 257271 | 1 | 0 | 0 | 0 | 0 |
| 260261 | 1 | 0 | 0 | 0 | 0 |
| 260268 | 1 | 0 | 0 | 0 | 0 |
| 261262 | 1 | 0 | 0 | 0 | 0 |
| 261263 | 1 | 0 | 0 | 0 | 0 |
| 261264 | 1 | 0 | 0 | 0 | 0 |
| 264265 | 1 | 0 | 0 | 0 | 0 |
| 264266 | 1 | 0 | 0 | 0 | 0 |
| 264267 | 1 | 0 | 0 | 0 | 0 |
| 267296 | 1 | 0 | 0 | 0 | 0 |
| 268269 | 1 | 0 | 0 | 0 | 0 |
| 268270 | 1 | 0 | 0 | 0 | 0 |
| 268276 | 1 | 0 | 0 | 0 | 0 |
| 271272 | 1 | 0 | 0 | 0 | 0 |
| 271273 | 1 | 0 | 0 | 0 | 0 |
| 271274 | 1 | 0 | 0 | 0 | 0 |
| 274275 | 1 | 0 | 0 | 0 | 0 |
| 276277 | 1 | 0 | 0 | 0 | 0 |
| 276278 | 1 | 0 | 0 | 0 | 0 |
| 276279 | 1 | 0 | 0 | 0 | 0 |
| 279280 | 1 | 0 | 0 | 0 | 0 |
| 281282 | 1 | 0 | 0 | 0 | 0 |
| 281283 | 1 | 0 | 0 | 0 | 0 |
| 281284 | 1 | 0 | 0 | 0 | 0 |
| 281293 | 1 | 0 | 0 | 0 | 0 |
| 284285 | 1 | 0 | 0 | 0 | 0 |
| 285286 | 1 | 0 | 0 | 0 | 0 |
| 285292 | 2 | 0 | 0 | 0 | 0 |
| 286287 | 1 | 0 | 0 | 0 | 0 |
| 286288 | 1 | 0 | 0 | 0 | 0 |
| 286289 | 1 | 0 | 0 | 0 | 0 |
| 289290 | 1 | 0 | 0 | 0 | 0 |
| 289291 | 1 | 0 | 0 | 0 | 0 |
| 289352 | 1 | 0 | 0 | 0 | 0 |
| 293294 | 1 | 0 | 0 | 0 | 0 |
| 293295 | 1 | 0 | 0 | 0 | 0 |
| 293341 | 1 | 0 | 0 | 0 | 0 |
| 296297 | 1 | 0 | 0 | 0 | 0 |
| 296298 | 1 | 0 | 0 | 0 | 0 |
| 296299 | 1 | 0 | 0 | 0 | 0 |
| 299300 | 1 | 0 | 0 | 0 | 0 |
| 299301 | 1 | 0 | 0 | 0 | 0 |
| 299302 | 1 | 0 | 0 | 0 | 0 |
| 302303 | 1 | 0 | 0 | 0 | 0 |
| 302310 | 2 | 0 | 0 | 0 | 0 |
| 303304 | 1 | 0 | 0 | 0 | 0 |
| 304305 | 1 | 0 | 0 | 0 | 0 |
| 304306 | 1 | 0 | 0 | 0 | 0 |
| 304307 | 1 | 0 | 0 | 0 | 0 |
| 307308 | 1 | 0 | 0 | 0 | 0 |
| 307309 | 1 | 0 | 0 | 0 | 0 |
| 307311 | 1 | 0 | 0 | 0 | 0 |
| 311312 | 1 | 0 | 0 | 0 | 0 |
| 312313 | 1 | 0 | 0 | 0 | 0 |
| 312320 | 2 | 0 | 0 | 0 | 0 |
| 313314 | 1 | 0 | 0 | 0 | 0 |
| 313315 | 2 | 0 | 0 | 0 | 0 |
| 315316 | 1 | 0 | 0 | 0 | 0 |
| 315317 | 1 | 0 | 0 | 0 | 0 |
| 317318 | 2 | 0 | 0 | 0 | 0 |
| 317322 | 1 | 0 | 0 | 0 | 0 |
| 318319 | 1 | 0 | 0 | 0 | 0 |
| 318320 | 1 | 0 | 0 | 0 | 0 |
| 320321 | 1 | 0 | 0 | 0 | 0 |
| 322323 | 1 | 0 | 0 | 0 | 0 |
| 322324 | 1 | 0 | 0 | 0 | 0 |
| 322328 | 1 | 0 | 0 | 0 | 0 |
| 323332 | 1 | 0 | 0 | 0 | 0 |
| 323339 | 2 | 0 | 0 | 0 | 0 |
| 324325 | 1 | 0 | 0 | 0 | 0 |
| 324326 | 1 | 0 | 0 | 0 | 0 |
| 324327 | 1 | 0 | 0 | 0 | 0 |
| 328329 | 1 | 0 | 0 | 0 | 0 |
| 328330 | 1 | 0 | 0 | 0 | 0 |
| 328331 | 1 | 0 | 0 | 0 | 0 |
| 332333 | 1 | 0 | 0 | 0 | 0 |
| 332334 | 2 | 0 | 0 | 0 | 0 |
| 334335 | 1 | 0 | 0 | 0 | 0 |
| 334336 | 1 | 0 | 0 | 0 | 0 |
| 336337 | 2 | 0 | 0 | 0 | 0 |

|        |   |   |   |   |   |
|--------|---|---|---|---|---|
| 336341 | 1 | 0 | 0 | 0 | 0 |
| 337338 | 1 | 0 | 0 | 0 | 0 |
| 337339 | 1 | 0 | 0 | 0 | 0 |
| 339340 | 1 | 0 | 0 | 0 | 0 |
| 342343 | 1 | 0 | 0 | 0 | 0 |
| 342344 | 1 | 0 | 0 | 0 | 0 |
| 342345 | 1 | 0 | 0 | 0 | 0 |
| 342356 | 1 | 0 | 0 | 0 | 0 |
| 345346 | 1 | 0 | 0 | 0 | 0 |
| 345353 | 1 | 0 | 0 | 0 | 0 |
| 346347 | 1 | 0 | 0 | 0 | 0 |
| 346348 | 1 | 0 | 0 | 0 | 0 |
| 346349 | 1 | 0 | 0 | 0 | 0 |
| 349350 | 1 | 0 | 0 | 0 | 0 |
| 349351 | 1 | 0 | 0 | 0 | 0 |
| 349352 | 1 | 0 | 0 | 0 | 0 |
| 352382 | 1 | 0 | 0 | 0 | 0 |
| 353354 | 1 | 0 | 0 | 0 | 0 |
| 353355 | 1 | 0 | 0 | 0 | 0 |
| 353361 | 1 | 0 | 0 | 0 | 0 |
| 356357 | 1 | 0 | 0 | 0 | 0 |
| 356358 | 1 | 0 | 0 | 0 | 0 |
| 356359 | 1 | 0 | 0 | 0 | 0 |
| 359360 | 1 | 0 | 0 | 0 | 0 |
| 361362 | 1 | 0 | 0 | 0 | 0 |
| 361363 | 1 | 0 | 0 | 0 | 0 |
| 361364 | 1 | 0 | 0 | 0 | 0 |
| 364365 | 1 | 0 | 0 | 0 | 0 |
| 366367 | 1 | 0 | 0 | 0 | 0 |
| 366368 | 1 | 0 | 0 | 0 | 0 |
| 366369 | 1 | 0 | 0 | 0 | 0 |
| 366379 | 1 | 0 | 0 | 0 | 0 |
| 369370 | 1 | 0 | 0 | 0 | 0 |
| 370371 | 1 | 0 | 0 | 0 | 0 |
| 370378 | 2 | 0 | 0 | 0 | 0 |
| 371372 | 1 | 0 | 0 | 0 | 0 |
| 371373 | 1 | 0 | 0 | 0 | 0 |
| 371374 | 1 | 0 | 0 | 0 | 0 |
| 374375 | 1 | 0 | 0 | 0 | 0 |
| 374376 | 1 | 0 | 0 | 0 | 0 |
| 374377 | 1 | 0 | 0 | 0 | 0 |
| 379380 | 1 | 0 | 0 | 0 | 0 |
| 379381 | 1 | 0 | 0 | 0 | 0 |
| 379427 | 1 | 0 | 0 | 0 | 0 |
| 382383 | 1 | 0 | 0 | 0 | 0 |
| 382384 | 1 | 0 | 0 | 0 | 0 |
| 382385 | 1 | 0 | 0 | 0 | 0 |
| 385386 | 1 | 0 | 0 | 0 | 0 |
| 385387 | 1 | 0 | 0 | 0 | 0 |
| 385388 | 1 | 0 | 0 | 0 | 0 |
| 388389 | 1 | 0 | 0 | 0 | 0 |
| 388396 | 2 | 0 | 0 | 0 | 0 |
| 389390 | 1 | 0 | 0 | 0 | 0 |
| 390391 | 1 | 0 | 0 | 0 | 0 |
| 390392 | 1 | 0 | 0 | 0 | 0 |
| 390393 | 1 | 0 | 0 | 0 | 0 |
| 393394 | 1 | 0 | 0 | 0 | 0 |
| 393395 | 1 | 0 | 0 | 0 | 0 |
| 393397 | 1 | 0 | 0 | 0 | 0 |
| 397398 | 1 | 0 | 0 | 0 | 0 |
| 398399 | 1 | 0 | 0 | 0 | 0 |
| 398406 | 2 | 0 | 0 | 0 | 0 |
| 399400 | 1 | 0 | 0 | 0 | 0 |
| 399401 | 2 | 0 | 0 | 0 | 0 |
| 401402 | 1 | 0 | 0 | 0 | 0 |
| 401403 | 1 | 0 | 0 | 0 | 0 |
| 403404 | 2 | 0 | 0 | 0 | 0 |
| 403408 | 1 | 0 | 0 | 0 | 0 |
| 404405 | 1 | 0 | 0 | 0 | 0 |
| 404406 | 1 | 0 | 0 | 0 | 0 |
| 406407 | 1 | 0 | 0 | 0 | 0 |
| 408409 | 1 | 0 | 0 | 0 | 0 |
| 408410 | 1 | 0 | 0 | 0 | 0 |
| 408414 | 1 | 0 | 0 | 0 | 0 |
| 409418 | 1 | 0 | 0 | 0 | 0 |
| 409425 | 2 | 0 | 0 | 0 | 0 |
| 410411 | 1 | 0 | 0 | 0 | 0 |
| 410412 | 1 | 0 | 0 | 0 | 0 |
| 410413 | 1 | 0 | 0 | 0 | 0 |
| 414415 | 1 | 0 | 0 | 0 | 0 |
| 414416 | 1 | 0 | 0 | 0 | 0 |

414417 1 0 0 0 0  
418419 1 0 0 0 0  
418420 2 0 0 0 0  
420421 1 0 0 0 0  
420422 1 0 0 0 0  
422423 2 0 0 0 0  
422427 1 0 0 0 0  
423424 1 0 0 0 0  
423425 1 0 0 0 0  
425426 1 0 0 0 0

M END  
> <NAME>  
D86\_1

\$\$\$\$  
D87\_1  
MOE2012 3D

442451 0 0 1 0 0 0 0 0999 V2000  
42.6610 35.0520 -40.7830 C 0 0 0 0 0 0 0 0 0 0 0 0 0 0 0 0  
42.8780 36.0800 -41.0960 H 0 0 0 0 0 0 0 0 0 0 0 0 0 0 0 0  
43.4620 34.4450 -41.2270 H 0 0 0 0 0 0 0 0 0 0 0 0 0 0 0 0  
42.6570 34.9410 -39.3080 N 0 0 0 0 0 0 0 0 0 0 0 0 0 0 0 0  
42.7940 33.5280 -38.8950 C 0 0 0 0 0 0 0 0 0 0 0 0 0 0 0 0  
42.2160 32.8770 -39.5600 H 0 0 0 0 0 0 0 0 0 0 0 0 0 0 0 0  
43.8380 33.1970 -38.9750 H 0 0 0 0 0 0 0 0 0 0 0 0 0 0 0 0  
42.2590 33.2960 -37.4740 C 0 0 0 0 0 0 0 0 0 0 0 0 0 0 0 0  
42.8140 33.8970 -36.7450 H 0 0 0 0 0 0 0 0 0 0 0 0 0 0 0 0  
41.2100 33.6170 -37.4240 H 0 0 0 0 0 0 0 0 0 0 0 0 0 0 0 0  
42.3630 31.8170 -37.0900 C 0 0 0 0 0 0 0 0 0 0 0 0 0 0 0 0  
41.7930 31.2130 -37.8060 H 0 0 0 0 0 0 0 0 0 0 0 0 0 0 0 0  
43.4120 31.5000 -37.1340 H 0 0 0 0 0 0 0 0 0 0 0 0 0 0 0 0  
43.7440 35.7590 -38.7280 C 0 0 0 0 0 0 0 0 0 0 0 0 0 0 0 0  
43.9640 35.4470 -37.7000 H 0 0 0 0 0 0 0 0 0 0 0 0 0 0 0 0  
44.6870 35.6160 -39.2740 H 0 0 0 0 0 0 0 0 0 0 0 0 0 0 0 0  
41.8320 31.6200 -35.7400 N 0 0 0 3 0 0 0 0 0 0 0 0 0 0 0 0  
42.3460 32.2070 -35.0830 H 0 0 0 0 0 0 0 0 0 0 0 0 0 0 0 0  
41.3090 34.6880 -41.4090 C 0 0 0 0 0 0 0 0 0 0 0 0 0 0 0 0  
41.0380 33.6440 -41.2260 H 0 0 0 0 0 0 0 0 0 0 0 0 0 0 0 0  
40.5170 35.3340 -41.0160 H 0 0 0 0 0 0 0 0 0 0 0 0 0 0 0 0  
41.3840 34.8780 -42.8190 O 0 0 0 0 0 0 0 0 0 0 0 0 0 0 0 0  
40.5010 34.6870 -43.1820 H 0 0 0 0 0 0 0 0 0 0 0 0 0 0 0 0  
43.3910 37.2490 -38.6600 C 0 0 0 0 0 0 0 0 0 0 0 0 0 0 0 0  
43.2640 37.6860 -39.6550 H 0 0 0 0 0 0 0 0 0 0 0 0 0 0 0 0  
42.4710 37.4020 -38.0860 H 0 0 0 0 0 0 0 0 0 0 0 0 0 0 0 0  
44.4460 37.9490 -38.0060 O 0 0 0 0 0 0 0 0 0 0 0 0 0 0 0 0  
44.1860 38.8860 -37.9740 H 0 0 0 0 0 0 0 0 0 0 0 0 0 0 0 0  
39.6180 14.7770 -31.6000 C 0 0 0 0 0 0 0 0 0 0 0 0 0 0 0 0  
39.5590 15.5510 -30.8280 H 0 0 0 0 0 0 0 0 0 0 0 0 0 0 0 0  
40.5900 14.9210 -32.0880 H 0 0 0 0 0 0 0 0 0 0 0 0 0 0 0 0  
39.5580 13.5080 -30.9270 O 0 0 0 0 0 0 0 0 0 0 0 0 0 0 0 0  
40.1350 12.4560 -31.5800 C 0 0 0 0 0 0 0 0 0 0 0 0 0 0 0 0  
40.0500 11.2150 -30.7150 C 0 0 0 0 0 0 0 0 0 0 0 0 0 0 0 0  
40.4480 11.4710 -29.7270 H 0 0 0 0 0 0 0 0 0 0 0 0 0 0 0 0  
38.9930 10.9440 -30.6160 H 0 0 0 0 0 0 0 0 0 0 0 0 0 0 0 0  
40.8480 10.0550 -31.3260 C 0 0 0 0 0 0 0 0 0 0 0 0 0 0 0 0  
40.3970 9.7800 -32.2890 H 0 0 0 0 0 0 0 0 0 0 0 0 0 0 0 0  
41.8560 10.4040 -31.5860 H 0 0 0 0 0 0 0 0 0 0 0 0 0 0 0 0  
40.6330 12.5150 -32.6950 O 0 0 0 0 0 0 0 0 0 0 0 0 0 0 0 0  
38.4710 14.9250 -32.5950 C 0 0 0 0 0 0 0 0 0 0 0 0 0 0 0 0  
38.5650 14.1500 -33.3650 H 0 0 0 0 0 0 0 0 0 0 0 0 0 0 0 0  
37.4920 14.7380 -32.1370 H 0 0 0 0 0 0 0 0 0 0 0 0 0 0 0 0  
41.9270 30.2170 -35.3320 C 0 0 0 0 0 0 0 0 0 0 0 0 0 0 0 0  
41.3770 29.5820 -36.0370 H 0 0 0 0 0 0 0 0 0 0 0 0 0 0 0 0  
42.9740 29.8900 -35.3370 H 0 0 0 0 0 0 0 0 0 0 0 0 0 0 0 0  
41.3400 30.0510 -33.9330 C 0 0 0 0 0 0 0 0 0 0 0 0 0 0 0 0  
41.8850 30.6840 -33.2230 H 0 0 0 0 0 0 0 0 0 0 0 0 0 0 0 0  
40.2820 30.3370 -33.9290 H 0 0 0 0 0 0 0 0 0 0 0 0 0 0 0 0  
41.4430 28.6230 -33.4630 C 0 0 0 0 0 0 0 0 0 0 0 0 0 0 0 0  
41.0290 28.5470 -32.1650 O 0 0 0 0 0 0 0 0 0 0 0 0 0 0 0 0  
41.1330 27.2550 -31.5470 C 0 0 0 0 0 0 0 0 0 0 0 0 0 0 0 0  
42.0660 26.7520 -31.8320 H 0 0 0 0 0 0 0 0 0 0 0 0 0 0 0 0  
41.2030 27.4160 -30.4650 H 0 0 0 0 0 0 0 0 0 0 0 0 0 0 0 0  
39.9170 26.3910 -31.8610 C 0 0 0 0 0 0 0 0 0 0 0 0 0 0 0 0  
39.0110 26.9190 -31.5370 H 0 0 0 0 0 0 0 0 0 0 0 0 0 0 0 0  
39.8550 26.2140 -32.9410 H 0 0 0 0 0 0 0 0 0 0 0 0 0 0 0 0  
41.8280 27.6750 -34.1320 O 0 0 0 0 0 0 0 0 0 0 0 0 0 0 0 0  
40.0620 25.1590 -31.1590 O 0 0 0 0 0 0 0 0 0 0 0 0 0 0 0 0  
39.0580 24.2410 -31.2880 C 0 0 0 0 0 0 0 0 0 0 0 0 0 0 0 0  
39.2540 23.0570 -30.5780 C 0 0 0 0 0 0 0 0 0 0 0 0 0 0 0 0  
40.1560 22.9240 -29.9860 H 0 0 0 0 0 0 0 0 0 0 0 0 0 0 0 0

|         |         |          |   |   |   |   |   |   |   |   |   |   |   |   |
|---------|---------|----------|---|---|---|---|---|---|---|---|---|---|---|---|
| 38.3010 | 22.0360 | -30.6190 | C | 0 | 0 | 0 | 0 | 0 | 0 | 0 | 0 | 0 | 0 | 0 |
| 38.4930 | 21.1260 | -30.0520 | H | 0 | 0 | 0 | 0 | 0 | 0 | 0 | 0 | 0 | 0 | 0 |
| 37.1200 | 22.1680 | -31.3740 | C | 0 | 0 | 0 | 0 | 0 | 0 | 0 | 0 | 0 | 0 | 0 |
| 36.9380 | 23.3660 | -32.0830 | C | 0 | 0 | 0 | 0 | 0 | 0 | 0 | 0 | 0 | 0 | 0 |
| 36.0480 | 23.5400 | -32.6810 | H | 0 | 0 | 0 | 0 | 0 | 0 | 0 | 0 | 0 | 0 | 0 |
| 37.8960 | 24.3900 | -32.0410 | C | 0 | 0 | 0 | 0 | 0 | 0 | 0 | 0 | 0 | 0 | 0 |
| 37.6960 | 25.2910 | -32.6120 | H | 0 | 0 | 0 | 0 | 0 | 0 | 0 | 0 | 0 | 0 | 0 |
| 36.0840 | 21.0200 | -31.3810 | C | 0 | 0 | 0 | 0 | 0 | 0 | 0 | 0 | 0 | 0 | 0 |
| 36.7360 | 19.6880 | -31.8220 | C | 0 | 0 | 0 | 0 | 0 | 0 | 0 | 0 | 0 | 0 | 0 |
| 35.4710 | 20.9720 | -29.9550 | C | 0 | 0 | 0 | 0 | 0 | 0 | 0 | 0 | 0 | 0 | 0 |
| 36.2130 | 20.7140 | -29.1900 | H | 0 | 0 | 0 | 0 | 0 | 0 | 0 | 0 | 0 | 0 | 0 |
| 34.6600 | 20.2380 | -29.8880 | H | 0 | 0 | 0 | 0 | 0 | 0 | 0 | 0 | 0 | 0 | 0 |
| 35.0470 | 21.9450 | -29.6750 | H | 0 | 0 | 0 | 0 | 0 | 0 | 0 | 0 | 0 | 0 | 0 |
| 34.8890 | 21.2620 | -32.3430 | C | 0 | 0 | 0 | 0 | 0 | 0 | 0 | 0 | 0 | 0 | 0 |
| 34.3100 | 22.1480 | -32.0530 | H | 0 | 0 | 0 | 0 | 0 | 0 | 0 | 0 | 0 | 0 | 0 |
| 35.2110 | 21.4050 | -33.3810 | H | 0 | 0 | 0 | 0 | 0 | 0 | 0 | 0 | 0 | 0 | 0 |
| 34.1980 | 20.4100 | -32.3360 | H | 0 | 0 | 0 | 0 | 0 | 0 | 0 | 0 | 0 | 0 | 0 |
| 37.4130 | 19.6170 | -33.0540 | C | 0 | 0 | 0 | 0 | 0 | 0 | 0 | 0 | 0 | 0 | 0 |
| 37.4950 | 20.4980 | -33.6890 | H | 0 | 0 | 0 | 0 | 0 | 0 | 0 | 0 | 0 | 0 | 0 |
| 37.9990 | 18.4260 | -33.4920 | C | 0 | 0 | 0 | 0 | 0 | 0 | 0 | 0 | 0 | 0 | 0 |
| 38.5140 | 18.4040 | -34.4500 | H | 0 | 0 | 0 | 0 | 0 | 0 | 0 | 0 | 0 | 0 | 0 |
| 37.9260 | 17.2670 | -32.7190 | C | 0 | 0 | 0 | 0 | 0 | 0 | 0 | 0 | 0 | 0 | 0 |
| 37.2660 | 17.3190 | -31.4950 | C | 0 | 0 | 0 | 0 | 0 | 0 | 0 | 0 | 0 | 0 | 0 |
| 37.1860 | 16.4520 | -30.8480 | H | 0 | 0 | 0 | 0 | 0 | 0 | 0 | 0 | 0 | 0 | 0 |
| 36.6770 | 18.5140 | -31.0530 | C | 0 | 0 | 0 | 0 | 0 | 0 | 0 | 0 | 0 | 0 | 0 |
| 36.1680 | 18.4930 | -30.0930 | H | 0 | 0 | 0 | 0 | 0 | 0 | 0 | 0 | 0 | 0 | 0 |
| 38.5380 | 16.1780 | -33.2720 | O | 0 | 0 | 0 | 0 | 0 | 0 | 0 | 0 | 0 | 0 | 0 |
| 37.6140 | 3.8030  | -29.1270 | C | 0 | 0 | 0 | 0 | 0 | 0 | 0 | 0 | 0 | 0 | 0 |
| 37.5600 | 2.9820  | -28.4020 | H | 0 | 0 | 0 | 0 | 0 | 0 | 0 | 0 | 0 | 0 | 0 |
| 36.6270 | 4.2820  | -29.0890 | H | 0 | 0 | 0 | 0 | 0 | 0 | 0 | 0 | 0 | 0 | 0 |
| 38.6870 | 4.7510  | -28.7720 | N | 0 | 0 | 0 | 0 | 0 | 0 | 0 | 0 | 0 | 0 | 0 |
| 38.4970 | 6.0480  | -29.4610 | C | 0 | 0 | 0 | 0 | 0 | 0 | 0 | 0 | 0 | 0 | 0 |
| 38.0860 | 5.9020  | -30.4670 | H | 0 | 0 | 0 | 0 | 0 | 0 | 0 | 0 | 0 | 0 | 0 |
| 37.7760 | 6.6770  | -28.9220 | H | 0 | 0 | 0 | 0 | 0 | 0 | 0 | 0 | 0 | 0 | 0 |
| 39.8420 | 6.7690  | -29.6260 | C | 0 | 0 | 0 | 0 | 0 | 0 | 0 | 0 | 0 | 0 | 0 |
| 40.3140 | 6.8760  | -28.6460 | H | 0 | 0 | 0 | 0 | 0 | 0 | 0 | 0 | 0 | 0 | 0 |
| 40.5020 | 6.1470  | -30.2440 | H | 0 | 0 | 0 | 0 | 0 | 0 | 0 | 0 | 0 | 0 | 0 |
| 39.6940 | 8.1580  | -30.2730 | C | 0 | 0 | 0 | 0 | 0 | 0 | 0 | 0 | 0 | 0 | 0 |
| 39.1840 | 8.0270  | -31.2350 | H | 0 | 0 | 0 | 0 | 0 | 0 | 0 | 0 | 0 | 0 | 0 |
| 39.0440 | 8.7780  | -29.6440 | H | 0 | 0 | 0 | 0 | 0 | 0 | 0 | 0 | 0 | 0 | 0 |
| 38.7480 | 4.9470  | -27.3080 | C | 0 | 0 | 0 | 0 | 0 | 0 | 0 | 0 | 0 | 0 | 0 |
| 39.2960 | 5.8630  | -27.0560 | H | 0 | 0 | 0 | 0 | 0 | 0 | 0 | 0 | 0 | 0 | 0 |
| 37.7460 | 5.0920  | -26.8810 | H | 0 | 0 | 0 | 0 | 0 | 0 | 0 | 0 | 0 | 0 | 0 |
| 40.9870 | 8.8340  | -30.5070 | N | 0 | 0 | 3 | 0 | 0 | 0 | 0 | 0 | 0 | 0 | 0 |
| 37.8420 | 3.1560  | -30.4980 | C | 0 | 0 | 0 | 0 | 0 | 0 | 0 | 0 | 0 | 0 | 0 |
| 37.8290 | 3.8900  | -31.3070 | H | 0 | 0 | 0 | 0 | 0 | 0 | 0 | 0 | 0 | 0 | 0 |
| 38.7990 | 2.6230  | -30.5180 | H | 0 | 0 | 0 | 0 | 0 | 0 | 0 | 0 | 0 | 0 | 0 |
| 36.8020 | 2.2160  | -30.7410 | O | 0 | 0 | 0 | 0 | 0 | 0 | 0 | 0 | 0 | 0 | 0 |
| 36.9830 | 1.7960  | -31.6000 | H | 0 | 0 | 0 | 0 | 0 | 0 | 0 | 0 | 0 | 0 | 0 |
| 39.4690 | 3.8000  | -26.5910 | C | 0 | 0 | 0 | 0 | 0 | 0 | 0 | 0 | 0 | 0 | 0 |
| 38.9130 | 2.8610  | -26.6620 | H | 0 | 0 | 0 | 0 | 0 | 0 | 0 | 0 | 0 | 0 | 0 |
| 40.4700 | 3.6510  | -27.0090 | H | 0 | 0 | 0 | 0 | 0 | 0 | 0 | 0 | 0 | 0 | 0 |
| 39.6080 | 4.1280  | -25.2110 | O | 0 | 0 | 0 | 0 | 0 | 0 | 0 | 0 | 0 | 0 | 0 |
| 40.0570 | 3.3770  | -24.7850 | H | 0 | 0 | 0 | 0 | 0 | 0 | 0 | 0 | 0 | 0 | 0 |
| 47.4060 | 5.8160  | -13.7430 | C | 0 | 0 | 0 | 0 | 0 | 0 | 0 | 0 | 0 | 0 | 0 |
| 47.1690 | 4.9410  | -14.3570 | H | 0 | 0 | 0 | 0 | 0 | 0 | 0 | 0 | 0 | 0 | 0 |
| 46.4450 | 6.3040  | -13.5380 | H | 0 | 0 | 0 | 0 | 0 | 0 | 0 | 0 | 0 | 0 | 0 |
| 48.0130 | 5.3340  | -12.5330 | O | 0 | 0 | 0 | 0 | 0 | 0 | 0 | 0 | 0 | 0 | 0 |
| 47.9360 | 6.1670  | -11.4560 | C | 0 | 0 | 0 | 0 | 0 | 0 | 0 | 0 | 0 | 0 | 0 |
| 48.6350 | 5.5300  | -10.2800 | C | 0 | 0 | 0 | 0 | 0 | 0 | 0 | 0 | 0 | 0 | 0 |
| 48.2240 | 4.5260  | -10.1390 | H | 0 | 0 | 0 | 0 | 0 | 0 | 0 | 0 | 0 | 0 | 0 |
| 49.6960 | 5.4530  | -10.5390 | H | 0 | 0 | 0 | 0 | 0 | 0 | 0 | 0 | 0 | 0 | 0 |
| 48.4380 | 6.3700  | -9.0150  | C | 0 | 0 | 0 | 0 | 0 | 0 | 0 | 0 | 0 | 0 | 0 |
| 48.7440 | 7.4050  | -9.2120  | H | 0 | 0 | 0 | 0 | 0 | 0 | 0 | 0 | 0 | 0 | 0 |
| 47.3640 | 6.4620  | -8.8130  | H | 0 | 0 | 0 | 0 | 0 | 0 | 0 | 0 | 0 | 0 | 0 |
| 47.4190 | 7.2740  | -11.4580 | O | 0 | 0 | 0 | 0 | 0 | 0 | 0 | 0 | 0 | 0 | 0 |
| 48.3540 | 6.7480  | -14.4890 | C | 0 | 0 | 0 | 0 | 0 | 0 | 0 | 0 | 0 | 0 | 0 |
| 48.5410 | 7.6370  | -13.8760 | H | 0 | 0 | 0 | 0 | 0 | 0 | 0 | 0 | 0 | 0 | 0 |
| 49.3450 | 6.3010  | -14.6350 | H | 0 | 0 | 0 | 0 | 0 | 0 | 0 | 0 | 0 | 0 | 0 |
| 41.7600 | 9.0610  | -29.2730 | C | 0 | 0 | 0 | 0 | 0 | 0 | 0 | 0 | 0 | 0 | 0 |
| 42.3120 | 10.0090 | -29.3300 | H | 0 | 0 | 0 | 0 | 0 | 0 | 0 | 0 | 0 | 0 | 0 |
| 41.0900 | 9.1710  | -28.4100 | H | 0 | 0 | 0 | 0 | 0 | 0 | 0 | 0 | 0 | 0 | 0 |
| 42.8120 | 7.9640  | -29.0710 | C | 0 | 0 | 0 | 0 | 0 | 0 | 0 | 0 | 0 | 0 | 0 |
| 42.5680 | 7.0600  | -29.6400 | H | 0 | 0 | 0 | 0 | 0 | 0 | 0 | 0 | 0 | 0 | 0 |
| 43.7950 | 8.2960  | -29.4240 | H | 0 | 0 | 0 | 0 | 0 | 0 | 0 | 0 | 0 | 0 | 0 |
| 42.9250 | 7.6030  | -27.6130 | C | 0 | 0 | 0 | 0 | 0 | 0 | 0 | 0 | 0 | 0 | 0 |
| 43.0090 | 6.2500  | -27.4630 | O | 0 | 0 | 0 | 0 | 0 | 0 | 0 | 0 | 0 | 0 | 0 |
| 43.0170 | 5.7620  | -26.1130 | C | 0 | 0 | 0 | 0 | 0 | 0 | 0 | 0 | 0 | 0 | 0 |
| 42.2680 | 6.2810  | -25.5030 | H | 0 | 0 | 0 | 0 | 0 | 0 | 0 | 0 | 0 | 0 | 0 |
| 42.7010 | 4.7130  | -26.1460 | H | 0 | 0 | 0 | 0 | 0 | 0 | 0 | 0 | 0 | 0 | 0 |
| 44.4070 | 5.8600  | -25.4960 | C | 0 | 0 | 0 | 0 | 0 | 0 | 0 | 0 | 0 | 0 | 0 |











|     |     |   |   |   |   |   |
|-----|-----|---|---|---|---|---|
| 24  | 26  | 1 | 0 | 0 | 0 | 0 |
| 24  | 27  | 1 | 0 | 0 | 0 | 0 |
| 27  | 28  | 1 | 0 | 0 | 0 | 0 |
| 29  | 30  | 1 | 0 | 0 | 0 | 0 |
| 29  | 31  | 1 | 0 | 0 | 0 | 0 |
| 29  | 32  | 1 | 0 | 0 | 0 | 0 |
| 29  | 41  | 1 | 0 | 0 | 0 | 0 |
| 32  | 33  | 1 | 0 | 0 | 0 | 0 |
| 33  | 34  | 1 | 0 | 0 | 0 | 0 |
| 33  | 40  | 2 | 0 | 0 | 0 | 0 |
| 34  | 35  | 1 | 0 | 0 | 0 | 0 |
| 34  | 36  | 1 | 0 | 0 | 0 | 0 |
| 34  | 37  | 1 | 0 | 0 | 0 | 0 |
| 37  | 38  | 1 | 0 | 0 | 0 | 0 |
| 37  | 39  | 1 | 0 | 0 | 0 | 0 |
| 37  | 106 | 1 | 0 | 0 | 0 | 0 |
| 41  | 42  | 1 | 0 | 0 | 0 | 0 |
| 41  | 43  | 1 | 0 | 0 | 0 | 0 |
| 41  | 89  | 1 | 0 | 0 | 0 | 0 |
| 44  | 45  | 1 | 0 | 0 | 0 | 0 |
| 44  | 46  | 1 | 0 | 0 | 0 | 0 |
| 44  | 47  | 1 | 0 | 0 | 0 | 0 |
| 47  | 48  | 1 | 0 | 0 | 0 | 0 |
| 47  | 49  | 1 | 0 | 0 | 0 | 0 |
| 47  | 50  | 1 | 0 | 0 | 0 | 0 |
| 50  | 51  | 1 | 0 | 0 | 0 | 0 |
| 50  | 58  | 2 | 0 | 0 | 0 | 0 |
| 51  | 52  | 1 | 0 | 0 | 0 | 0 |
| 52  | 53  | 1 | 0 | 0 | 0 | 0 |
| 52  | 54  | 1 | 0 | 0 | 0 | 0 |
| 52  | 55  | 1 | 0 | 0 | 0 | 0 |
| 55  | 56  | 1 | 0 | 0 | 0 | 0 |
| 55  | 57  | 1 | 0 | 0 | 0 | 0 |
| 55  | 59  | 1 | 0 | 0 | 0 | 0 |
| 59  | 60  | 1 | 0 | 0 | 0 | 0 |
| 60  | 61  | 1 | 0 | 0 | 0 | 0 |
| 60  | 68  | 2 | 0 | 0 | 0 | 0 |
| 61  | 62  | 1 | 0 | 0 | 0 | 0 |
| 61  | 63  | 2 | 0 | 0 | 0 | 0 |
| 63  | 64  | 1 | 0 | 0 | 0 | 0 |
| 63  | 65  | 1 | 0 | 0 | 0 | 0 |
| 65  | 66  | 2 | 0 | 0 | 0 | 0 |
| 65  | 70  | 1 | 0 | 0 | 0 | 0 |
| 66  | 67  | 1 | 0 | 0 | 0 | 0 |
| 66  | 68  | 1 | 0 | 0 | 0 | 0 |
| 68  | 69  | 1 | 0 | 0 | 0 | 0 |
| 70  | 71  | 1 | 0 | 0 | 0 | 0 |
| 70  | 72  | 1 | 0 | 0 | 0 | 0 |
| 70  | 76  | 1 | 0 | 0 | 0 | 0 |
| 71  | 80  | 1 | 0 | 0 | 0 | 0 |
| 71  | 87  | 2 | 0 | 0 | 0 | 0 |
| 72  | 73  | 1 | 0 | 0 | 0 | 0 |
| 72  | 74  | 1 | 0 | 0 | 0 | 0 |
| 72  | 75  | 1 | 0 | 0 | 0 | 0 |
| 76  | 77  | 1 | 0 | 0 | 0 | 0 |
| 76  | 78  | 1 | 0 | 0 | 0 | 0 |
| 76  | 79  | 1 | 0 | 0 | 0 | 0 |
| 80  | 81  | 1 | 0 | 0 | 0 | 0 |
| 80  | 82  | 2 | 0 | 0 | 0 | 0 |
| 82  | 83  | 1 | 0 | 0 | 0 | 0 |
| 82  | 84  | 1 | 0 | 0 | 0 | 0 |
| 84  | 85  | 2 | 0 | 0 | 0 | 0 |
| 84  | 89  | 1 | 0 | 0 | 0 | 0 |
| 85  | 86  | 1 | 0 | 0 | 0 | 0 |
| 85  | 87  | 1 | 0 | 0 | 0 | 0 |
| 87  | 88  | 1 | 0 | 0 | 0 | 0 |
| 90  | 91  | 1 | 0 | 0 | 0 | 0 |
| 90  | 92  | 1 | 0 | 0 | 0 | 0 |
| 90  | 93  | 1 | 0 | 0 | 0 | 0 |
| 90  | 107 | 1 | 0 | 0 | 0 | 0 |
| 93  | 94  | 1 | 0 | 0 | 0 | 0 |
| 93  | 103 | 1 | 0 | 0 | 0 | 0 |
| 94  | 95  | 1 | 0 | 0 | 0 | 0 |
| 94  | 96  | 1 | 0 | 0 | 0 | 0 |
| 94  | 97  | 1 | 0 | 0 | 0 | 0 |
| 97  | 98  | 1 | 0 | 0 | 0 | 0 |
| 97  | 99  | 1 | 0 | 0 | 0 | 0 |
| 97  | 100 | 1 | 0 | 0 | 0 | 0 |
| 100 | 101 | 1 | 0 | 0 | 0 | 0 |
| 100 | 102 | 1 | 0 | 0 | 0 | 0 |
| 100 | 106 | 1 | 0 | 0 | 0 | 0 |

|        |   |   |   |   |   |
|--------|---|---|---|---|---|
| 103104 | 1 | 0 | 0 | 0 | 0 |
| 103105 | 1 | 0 | 0 | 0 | 0 |
| 103112 | 1 | 0 | 0 | 0 | 0 |
| 106132 | 1 | 0 | 0 | 0 | 0 |
| 107108 | 1 | 0 | 0 | 0 | 0 |
| 107109 | 1 | 0 | 0 | 0 | 0 |
| 107110 | 1 | 0 | 0 | 0 | 0 |
| 110111 | 1 | 0 | 0 | 0 | 0 |
| 112113 | 1 | 0 | 0 | 0 | 0 |
| 112114 | 1 | 0 | 0 | 0 | 0 |
| 112115 | 1 | 0 | 0 | 0 | 0 |
| 115116 | 1 | 0 | 0 | 0 | 0 |
| 117118 | 1 | 0 | 0 | 0 | 0 |
| 117119 | 1 | 0 | 0 | 0 | 0 |
| 117120 | 1 | 0 | 0 | 0 | 0 |
| 117129 | 1 | 0 | 0 | 0 | 0 |
| 120121 | 1 | 0 | 0 | 0 | 0 |
| 121122 | 1 | 0 | 0 | 0 | 0 |
| 121128 | 2 | 0 | 0 | 0 | 0 |
| 122123 | 1 | 0 | 0 | 0 | 0 |
| 122124 | 1 | 0 | 0 | 0 | 0 |
| 122125 | 1 | 0 | 0 | 0 | 0 |
| 125126 | 1 | 0 | 0 | 0 | 0 |
| 125127 | 1 | 0 | 0 | 0 | 0 |
| 125194 | 1 | 0 | 0 | 0 | 0 |
| 129130 | 1 | 0 | 0 | 0 | 0 |
| 129131 | 1 | 0 | 0 | 0 | 0 |
| 129177 | 1 | 0 | 0 | 0 | 0 |
| 132133 | 1 | 0 | 0 | 0 | 0 |
| 132134 | 1 | 0 | 0 | 0 | 0 |
| 132135 | 1 | 0 | 0 | 0 | 0 |
| 135136 | 1 | 0 | 0 | 0 | 0 |
| 135137 | 1 | 0 | 0 | 0 | 0 |
| 135138 | 1 | 0 | 0 | 0 | 0 |
| 138139 | 1 | 0 | 0 | 0 | 0 |
| 138146 | 2 | 0 | 0 | 0 | 0 |
| 139140 | 1 | 0 | 0 | 0 | 0 |
| 140141 | 1 | 0 | 0 | 0 | 0 |
| 140142 | 1 | 0 | 0 | 0 | 0 |
| 140143 | 1 | 0 | 0 | 0 | 0 |
| 143144 | 1 | 0 | 0 | 0 | 0 |
| 143145 | 1 | 0 | 0 | 0 | 0 |
| 143147 | 1 | 0 | 0 | 0 | 0 |
| 147148 | 1 | 0 | 0 | 0 | 0 |
| 148149 | 1 | 0 | 0 | 0 | 0 |
| 148156 | 2 | 0 | 0 | 0 | 0 |
| 149150 | 1 | 0 | 0 | 0 | 0 |
| 149151 | 2 | 0 | 0 | 0 | 0 |
| 151152 | 1 | 0 | 0 | 0 | 0 |
| 151153 | 1 | 0 | 0 | 0 | 0 |
| 153154 | 2 | 0 | 0 | 0 | 0 |
| 153158 | 1 | 0 | 0 | 0 | 0 |
| 154155 | 1 | 0 | 0 | 0 | 0 |
| 154156 | 1 | 0 | 0 | 0 | 0 |
| 156157 | 1 | 0 | 0 | 0 | 0 |
| 158159 | 1 | 0 | 0 | 0 | 0 |
| 158160 | 1 | 0 | 0 | 0 | 0 |
| 158164 | 1 | 0 | 0 | 0 | 0 |
| 159168 | 1 | 0 | 0 | 0 | 0 |
| 159175 | 2 | 0 | 0 | 0 | 0 |
| 160161 | 1 | 0 | 0 | 0 | 0 |
| 160162 | 1 | 0 | 0 | 0 | 0 |
| 160163 | 1 | 0 | 0 | 0 | 0 |
| 164165 | 1 | 0 | 0 | 0 | 0 |
| 164166 | 1 | 0 | 0 | 0 | 0 |
| 164167 | 1 | 0 | 0 | 0 | 0 |
| 168169 | 1 | 0 | 0 | 0 | 0 |
| 168170 | 2 | 0 | 0 | 0 | 0 |
| 170171 | 1 | 0 | 0 | 0 | 0 |
| 170172 | 1 | 0 | 0 | 0 | 0 |
| 172173 | 2 | 0 | 0 | 0 | 0 |
| 172177 | 1 | 0 | 0 | 0 | 0 |
| 173174 | 1 | 0 | 0 | 0 | 0 |
| 173175 | 1 | 0 | 0 | 0 | 0 |
| 175176 | 1 | 0 | 0 | 0 | 0 |
| 178179 | 1 | 0 | 0 | 0 | 0 |
| 178180 | 1 | 0 | 0 | 0 | 0 |
| 178181 | 1 | 0 | 0 | 0 | 0 |
| 178195 | 1 | 0 | 0 | 0 | 0 |
| 181182 | 1 | 0 | 0 | 0 | 0 |
| 181191 | 1 | 0 | 0 | 0 | 0 |

|        |   |   |   |   |   |
|--------|---|---|---|---|---|
| 182183 | 1 | 0 | 0 | 0 | 0 |
| 182184 | 1 | 0 | 0 | 0 | 0 |
| 182185 | 1 | 0 | 0 | 0 | 0 |
| 185186 | 1 | 0 | 0 | 0 | 0 |
| 185187 | 1 | 0 | 0 | 0 | 0 |
| 185188 | 1 | 0 | 0 | 0 | 0 |
| 188189 | 1 | 0 | 0 | 0 | 0 |
| 188190 | 1 | 0 | 0 | 0 | 0 |
| 188194 | 1 | 0 | 0 | 0 | 0 |
| 191192 | 1 | 0 | 0 | 0 | 0 |
| 191193 | 1 | 0 | 0 | 0 | 0 |
| 191200 | 1 | 0 | 0 | 0 | 0 |
| 194220 | 1 | 0 | 0 | 0 | 0 |
| 195196 | 1 | 0 | 0 | 0 | 0 |
| 195197 | 1 | 0 | 0 | 0 | 0 |
| 195198 | 1 | 0 | 0 | 0 | 0 |
| 198199 | 1 | 0 | 0 | 0 | 0 |
| 200201 | 1 | 0 | 0 | 0 | 0 |
| 200202 | 1 | 0 | 0 | 0 | 0 |
| 200203 | 1 | 0 | 0 | 0 | 0 |
| 203204 | 1 | 0 | 0 | 0 | 0 |
| 205206 | 1 | 0 | 0 | 0 | 0 |
| 205207 | 1 | 0 | 0 | 0 | 0 |
| 205208 | 1 | 0 | 0 | 0 | 0 |
| 205217 | 1 | 0 | 0 | 0 | 0 |
| 208209 | 1 | 0 | 0 | 0 | 0 |
| 209210 | 1 | 0 | 0 | 0 | 0 |
| 209216 | 2 | 0 | 0 | 0 | 0 |
| 210211 | 1 | 0 | 0 | 0 | 0 |
| 210212 | 1 | 0 | 0 | 0 | 0 |
| 210213 | 1 | 0 | 0 | 0 | 0 |
| 213214 | 1 | 0 | 0 | 0 | 0 |
| 213215 | 1 | 0 | 0 | 0 | 0 |
| 213282 | 1 | 0 | 0 | 0 | 0 |
| 217218 | 1 | 0 | 0 | 0 | 0 |
| 217219 | 1 | 0 | 0 | 0 | 0 |
| 217265 | 1 | 0 | 0 | 0 | 0 |
| 220221 | 1 | 0 | 0 | 0 | 0 |
| 220222 | 1 | 0 | 0 | 0 | 0 |
| 220223 | 1 | 0 | 0 | 0 | 0 |
| 223224 | 1 | 0 | 0 | 0 | 0 |
| 223225 | 1 | 0 | 0 | 0 | 0 |
| 223226 | 1 | 0 | 0 | 0 | 0 |
| 226227 | 1 | 0 | 0 | 0 | 0 |
| 226234 | 2 | 0 | 0 | 0 | 0 |
| 227228 | 1 | 0 | 0 | 0 | 0 |
| 228229 | 1 | 0 | 0 | 0 | 0 |
| 228230 | 1 | 0 | 0 | 0 | 0 |
| 228231 | 1 | 0 | 0 | 0 | 0 |
| 231232 | 1 | 0 | 0 | 0 | 0 |
| 231233 | 1 | 0 | 0 | 0 | 0 |
| 231235 | 1 | 0 | 0 | 0 | 0 |
| 235236 | 1 | 0 | 0 | 0 | 0 |
| 236237 | 1 | 0 | 0 | 0 | 0 |
| 236244 | 2 | 0 | 0 | 0 | 0 |
| 237238 | 1 | 0 | 0 | 0 | 0 |
| 237239 | 2 | 0 | 0 | 0 | 0 |
| 239240 | 1 | 0 | 0 | 0 | 0 |
| 239241 | 1 | 0 | 0 | 0 | 0 |
| 241242 | 2 | 0 | 0 | 0 | 0 |
| 241246 | 1 | 0 | 0 | 0 | 0 |
| 242243 | 1 | 0 | 0 | 0 | 0 |
| 242244 | 1 | 0 | 0 | 0 | 0 |
| 244245 | 1 | 0 | 0 | 0 | 0 |
| 246247 | 1 | 0 | 0 | 0 | 0 |
| 246248 | 1 | 0 | 0 | 0 | 0 |
| 246252 | 1 | 0 | 0 | 0 | 0 |
| 247256 | 1 | 0 | 0 | 0 | 0 |
| 247263 | 2 | 0 | 0 | 0 | 0 |
| 248249 | 1 | 0 | 0 | 0 | 0 |
| 248250 | 1 | 0 | 0 | 0 | 0 |
| 248251 | 1 | 0 | 0 | 0 | 0 |
| 252253 | 1 | 0 | 0 | 0 | 0 |
| 252254 | 1 | 0 | 0 | 0 | 0 |
| 252255 | 1 | 0 | 0 | 0 | 0 |
| 256257 | 1 | 0 | 0 | 0 | 0 |
| 256258 | 2 | 0 | 0 | 0 | 0 |
| 258259 | 1 | 0 | 0 | 0 | 0 |
| 258260 | 1 | 0 | 0 | 0 | 0 |
| 260261 | 2 | 0 | 0 | 0 | 0 |
| 260265 | 1 | 0 | 0 | 0 | 0 |

|        |   |   |   |   |   |
|--------|---|---|---|---|---|
| 261262 | 1 | 0 | 0 | 0 | 0 |
| 261263 | 1 | 0 | 0 | 0 | 0 |
| 263264 | 1 | 0 | 0 | 0 | 0 |
| 266267 | 1 | 0 | 0 | 0 | 0 |
| 266268 | 1 | 0 | 0 | 0 | 0 |
| 266269 | 1 | 0 | 0 | 0 | 0 |
| 266283 | 1 | 0 | 0 | 0 | 0 |
| 269270 | 1 | 0 | 0 | 0 | 0 |
| 269279 | 1 | 0 | 0 | 0 | 0 |
| 270271 | 1 | 0 | 0 | 0 | 0 |
| 270272 | 1 | 0 | 0 | 0 | 0 |
| 270273 | 1 | 0 | 0 | 0 | 0 |
| 273274 | 1 | 0 | 0 | 0 | 0 |
| 273275 | 1 | 0 | 0 | 0 | 0 |
| 273276 | 1 | 0 | 0 | 0 | 0 |
| 276277 | 1 | 0 | 0 | 0 | 0 |
| 276278 | 1 | 0 | 0 | 0 | 0 |
| 276282 | 1 | 0 | 0 | 0 | 0 |
| 279280 | 1 | 0 | 0 | 0 | 0 |
| 279281 | 1 | 0 | 0 | 0 | 0 |
| 279288 | 1 | 0 | 0 | 0 | 0 |
| 282308 | 1 | 0 | 0 | 0 | 0 |
| 283284 | 1 | 0 | 0 | 0 | 0 |
| 283285 | 1 | 0 | 0 | 0 | 0 |
| 283286 | 1 | 0 | 0 | 0 | 0 |
| 286287 | 1 | 0 | 0 | 0 | 0 |
| 288289 | 1 | 0 | 0 | 0 | 0 |
| 288290 | 1 | 0 | 0 | 0 | 0 |
| 288291 | 1 | 0 | 0 | 0 | 0 |
| 291292 | 1 | 0 | 0 | 0 | 0 |
| 293294 | 1 | 0 | 0 | 0 | 0 |
| 293295 | 1 | 0 | 0 | 0 | 0 |
| 293296 | 1 | 0 | 0 | 0 | 0 |
| 293305 | 1 | 0 | 0 | 0 | 0 |
| 296297 | 1 | 0 | 0 | 0 | 0 |
| 297298 | 1 | 0 | 0 | 0 | 0 |
| 297304 | 2 | 0 | 0 | 0 | 0 |
| 298299 | 1 | 0 | 0 | 0 | 0 |
| 298300 | 1 | 0 | 0 | 0 | 0 |
| 298301 | 1 | 0 | 0 | 0 | 0 |
| 301302 | 1 | 0 | 0 | 0 | 0 |
| 301303 | 1 | 0 | 0 | 0 | 0 |
| 301370 | 1 | 0 | 0 | 0 | 0 |
| 305306 | 1 | 0 | 0 | 0 | 0 |
| 305307 | 1 | 0 | 0 | 0 | 0 |
| 305353 | 1 | 0 | 0 | 0 | 0 |
| 308309 | 1 | 0 | 0 | 0 | 0 |
| 308310 | 1 | 0 | 0 | 0 | 0 |
| 308311 | 1 | 0 | 0 | 0 | 0 |
| 311312 | 1 | 0 | 0 | 0 | 0 |
| 311313 | 1 | 0 | 0 | 0 | 0 |
| 311314 | 1 | 0 | 0 | 0 | 0 |
| 314315 | 1 | 0 | 0 | 0 | 0 |
| 314322 | 2 | 0 | 0 | 0 | 0 |
| 315316 | 1 | 0 | 0 | 0 | 0 |
| 316317 | 1 | 0 | 0 | 0 | 0 |
| 316318 | 1 | 0 | 0 | 0 | 0 |
| 316319 | 1 | 0 | 0 | 0 | 0 |
| 319320 | 1 | 0 | 0 | 0 | 0 |
| 319321 | 1 | 0 | 0 | 0 | 0 |
| 319323 | 1 | 0 | 0 | 0 | 0 |
| 323324 | 1 | 0 | 0 | 0 | 0 |
| 324325 | 1 | 0 | 0 | 0 | 0 |
| 324332 | 2 | 0 | 0 | 0 | 0 |
| 325326 | 1 | 0 | 0 | 0 | 0 |
| 325327 | 2 | 0 | 0 | 0 | 0 |
| 327328 | 1 | 0 | 0 | 0 | 0 |
| 327329 | 1 | 0 | 0 | 0 | 0 |
| 329330 | 2 | 0 | 0 | 0 | 0 |
| 329334 | 1 | 0 | 0 | 0 | 0 |
| 330331 | 1 | 0 | 0 | 0 | 0 |
| 330332 | 1 | 0 | 0 | 0 | 0 |
| 332333 | 1 | 0 | 0 | 0 | 0 |
| 334335 | 1 | 0 | 0 | 0 | 0 |
| 334336 | 1 | 0 | 0 | 0 | 0 |
| 334340 | 1 | 0 | 0 | 0 | 0 |
| 335344 | 1 | 0 | 0 | 0 | 0 |
| 335351 | 2 | 0 | 0 | 0 | 0 |
| 336337 | 1 | 0 | 0 | 0 | 0 |
| 336338 | 1 | 0 | 0 | 0 | 0 |
| 336339 | 1 | 0 | 0 | 0 | 0 |

|        |   |   |   |   |   |
|--------|---|---|---|---|---|
| 340341 | 1 | 0 | 0 | 0 | 0 |
| 340342 | 1 | 0 | 0 | 0 | 0 |
| 340343 | 1 | 0 | 0 | 0 | 0 |
| 344345 | 1 | 0 | 0 | 0 | 0 |
| 344346 | 2 | 0 | 0 | 0 | 0 |
| 346347 | 1 | 0 | 0 | 0 | 0 |
| 346348 | 1 | 0 | 0 | 0 | 0 |
| 348349 | 2 | 0 | 0 | 0 | 0 |
| 348353 | 1 | 0 | 0 | 0 | 0 |
| 349350 | 1 | 0 | 0 | 0 | 0 |
| 349351 | 1 | 0 | 0 | 0 | 0 |
| 351352 | 1 | 0 | 0 | 0 | 0 |
| 354355 | 1 | 0 | 0 | 0 | 0 |
| 354356 | 1 | 0 | 0 | 0 | 0 |
| 354357 | 1 | 0 | 0 | 0 | 0 |
| 354371 | 1 | 0 | 0 | 0 | 0 |
| 357358 | 1 | 0 | 0 | 0 | 0 |
| 357367 | 1 | 0 | 0 | 0 | 0 |
| 358359 | 1 | 0 | 0 | 0 | 0 |
| 358360 | 1 | 0 | 0 | 0 | 0 |
| 358361 | 1 | 0 | 0 | 0 | 0 |
| 361362 | 1 | 0 | 0 | 0 | 0 |
| 361363 | 1 | 0 | 0 | 0 | 0 |
| 361364 | 1 | 0 | 0 | 0 | 0 |
| 364365 | 1 | 0 | 0 | 0 | 0 |
| 364366 | 1 | 0 | 0 | 0 | 0 |
| 364370 | 1 | 0 | 0 | 0 | 0 |
| 367368 | 1 | 0 | 0 | 0 | 0 |
| 367369 | 1 | 0 | 0 | 0 | 0 |
| 367376 | 1 | 0 | 0 | 0 | 0 |
| 370397 | 1 | 0 | 0 | 0 | 0 |
| 371372 | 1 | 0 | 0 | 0 | 0 |
| 371373 | 1 | 0 | 0 | 0 | 0 |
| 371374 | 1 | 0 | 0 | 0 | 0 |
| 374375 | 1 | 0 | 0 | 0 | 0 |
| 376377 | 1 | 0 | 0 | 0 | 0 |
| 376378 | 1 | 0 | 0 | 0 | 0 |
| 376379 | 1 | 0 | 0 | 0 | 0 |
| 379380 | 1 | 0 | 0 | 0 | 0 |
| 381382 | 1 | 0 | 0 | 0 | 0 |
| 381383 | 1 | 0 | 0 | 0 | 0 |
| 381384 | 1 | 0 | 0 | 0 | 0 |
| 381394 | 1 | 0 | 0 | 0 | 0 |
| 384385 | 1 | 0 | 0 | 0 | 0 |
| 385386 | 1 | 0 | 0 | 0 | 0 |
| 385393 | 2 | 0 | 0 | 0 | 0 |
| 386387 | 1 | 0 | 0 | 0 | 0 |
| 386388 | 1 | 0 | 0 | 0 | 0 |
| 386389 | 1 | 0 | 0 | 0 | 0 |
| 389390 | 1 | 0 | 0 | 0 | 0 |
| 389391 | 1 | 0 | 0 | 0 | 0 |
| 389392 | 1 | 0 | 0 | 0 | 0 |
| 394395 | 1 | 0 | 0 | 0 | 0 |
| 394396 | 1 | 0 | 0 | 0 | 0 |
| 394442 | 1 | 0 | 0 | 0 | 0 |
| 397398 | 1 | 0 | 0 | 0 | 0 |
| 397399 | 1 | 0 | 0 | 0 | 0 |
| 397400 | 1 | 0 | 0 | 0 | 0 |
| 400401 | 1 | 0 | 0 | 0 | 0 |
| 400402 | 1 | 0 | 0 | 0 | 0 |
| 400403 | 1 | 0 | 0 | 0 | 0 |
| 403404 | 1 | 0 | 0 | 0 | 0 |
| 403411 | 2 | 0 | 0 | 0 | 0 |
| 404405 | 1 | 0 | 0 | 0 | 0 |
| 405406 | 1 | 0 | 0 | 0 | 0 |
| 405407 | 1 | 0 | 0 | 0 | 0 |
| 405408 | 1 | 0 | 0 | 0 | 0 |
| 408409 | 1 | 0 | 0 | 0 | 0 |
| 408410 | 1 | 0 | 0 | 0 | 0 |
| 408412 | 1 | 0 | 0 | 0 | 0 |
| 412413 | 1 | 0 | 0 | 0 | 0 |
| 413414 | 1 | 0 | 0 | 0 | 0 |
| 413421 | 2 | 0 | 0 | 0 | 0 |
| 414415 | 1 | 0 | 0 | 0 | 0 |
| 414416 | 2 | 0 | 0 | 0 | 0 |
| 416417 | 1 | 0 | 0 | 0 | 0 |
| 416418 | 1 | 0 | 0 | 0 | 0 |
| 418419 | 2 | 0 | 0 | 0 | 0 |
| 418423 | 1 | 0 | 0 | 0 | 0 |
| 419420 | 1 | 0 | 0 | 0 | 0 |
| 419421 | 1 | 0 | 0 | 0 | 0 |

```

421422 1 0 0 0 0
423424 1 0 0 0 0
423425 1 0 0 0 0
423429 1 0 0 0 0
424433 1 0 0 0 0
424440 2 0 0 0 0
425426 1 0 0 0 0
425427 1 0 0 0 0
425428 1 0 0 0 0
429430 1 0 0 0 0
429431 1 0 0 0 0
429432 1 0 0 0 0
433434 1 0 0 0 0
433435 2 0 0 0 0
435436 1 0 0 0 0
435437 1 0 0 0 0
437438 2 0 0 0 0
437442 1 0 0 0 0
438439 1 0 0 0 0
438440 1 0 0 0 0
440441 1 0 0 0 0

```

```

M END
> <NAME>
D87_1

```

\$\$\$\$

```

D93_1
MOE2012 3D

```

```

397411 0 0 1 0 0 0 0 0 0999 V2000
57.2500 42.9720 -10.7790 N 0 0 0 0 0 0 0 0 0 0 0 0 0 0 0 0 0 0
57.8880 43.1640 -9.5870 C 0 0 0 0 0 0 0 0 0 0 0 0 0 0 0 0 0 0
58.1040 42.3600 -8.8980 H 0 0 0 0 0 0 0 0 0 0 0 0 0 0 0 0 0 0
58.1400 44.5160 -9.5380 C 0 0 0 0 0 0 0 0 0 0 0 0 0 0 0 0 0 0
58.6340 45.0700 -8.7520 H 0 0 0 0 0 0 0 0 0 0 0 0 0 0 0 0 0 0
57.6710 45.1430 -10.6640 N 0 0 0 0 0 0 0 0 0 0 0 0 0 0 0 0 0 0
57.1380 44.1870 -11.3920 C 0 0 0 0 0 0 0 0 0 0 0 0 0 0 0 0 0 0
56.6660 44.3200 -12.3560 H 0 0 0 0 0 0 0 0 0 0 0 0 0 0 0 0 0 0
56.7700 41.7080 -11.2980 C 0 0 0 0 0 0 0 0 0 0 0 0 0 0 0 0 0 0
56.4350 41.1080 -10.4440 H 0 0 0 0 0 0 0 0 0 0 0 0 0 0 0 0 0 0
55.8920 41.9180 -11.9200 H 0 0 0 0 0 0 0 0 0 0 0 0 0 0 0 0 0 0
57.8410 40.9700 -12.0980 C 0 0 0 0 0 0 0 0 0 0 0 0 0 0 0 0 0 0
58.1800 41.6000 -12.9310 H 0 0 0 0 0 0 0 0 0 0 0 0 0 0 0 0 0 0
58.7190 40.7920 -11.4620 H 0 0 0 0 0 0 0 0 0 0 0 0 0 0 0 0 0 0
57.3060 39.6410 -12.6300 C 0 0 0 0 0 0 0 0 0 0 0 0 0 0 0 0 0 0
56.9650 39.0250 -11.7900 H 0 0 0 0 0 0 0 0 0 0 0 0 0 0 0 0 0 0
56.4470 39.8280 -13.2860 H 0 0 0 0 0 0 0 0 0 0 0 0 0 0 0 0 0 0
58.3620 38.9450 -13.3630 N 0 0 0 3 0 0 0 0 0 0 0 0 0 0 0 0 0 0
58.6890 39.5290 -14.1340 H 0 0 0 0 0 0 0 0 0 0 0 0 0 0 0 0 0 0
54.3640 21.6590 -16.3030 C 0 0 0 0 0 0 0 0 0 0 0 0 0 0 0 0 0 0
55.2360 22.0510 -16.8370 H 0 0 0 0 0 0 0 0 0 0 0 0 0 0 0 0 0 0
53.4940 22.1550 -16.7510 H 0 0 0 0 0 0 0 0 0 0 0 0 0 0 0 0 0 0
54.3300 20.2400 -16.5340 O 0 0 0 0 0 0 0 0 0 0 0 0 0 0 0 0 0 0
53.1080 19.6430 -16.4150 C 0 0 0 0 0 0 0 0 0 0 0 0 0 0 0 0 0 0
53.2380 18.1650 -16.6910 C 0 0 0 0 0 0 0 0 0 0 0 0 0 0 0 0 0 0
53.5220 18.0530 -17.7410 H 0 0 0 0 0 0 0 0 0 0 0 0 0 0 0 0 0 0
54.0360 17.7680 -16.0530 H 0 0 0 0 0 0 0 0 0 0 0 0 0 0 0 0 0 0
51.9240 17.4340 -16.3880 C 0 0 0 0 0 0 0 0 0 0 0 0 0 0 0 0 0 0
51.6200 17.7160 -15.3700 H 0 0 0 0 0 0 0 0 0 0 0 0 0 0 0 0 0 0
51.1280 17.7870 -17.0570 H 0 0 0 0 0 0 0 0 0 0 0 0 0 0 0 0 0 0
52.0650 20.2150 -16.1320 O 0 0 0 0 0 0 0 0 0 0 0 0 0 0 0 0 0 0
54.4710 21.9620 -14.8130 C 0 0 0 0 0 0 0 0 0 0 0 0 0 0 0 0 0 0
53.5710 21.5930 -14.3080 H 0 0 0 0 0 0 0 0 0 0 0 0 0 0 0 0 0 0
55.2960 21.4180 -14.3360 H 0 0 0 0 0 0 0 0 0 0 0 0 0 0 0 0 0 0
57.8850 37.6610 -13.8830 C 0 0 0 0 0 0 0 0 0 0 0 0 0 0 0 0 0 0
57.5240 37.0340 -13.0580 H 0 0 0 0 0 0 0 0 0 0 0 0 0 0 0 0 0 0
57.0450 37.8200 -14.5710 H 0 0 0 0 0 0 0 0 0 0 0 0 0 0 0 0 0 0
59.0190 36.9420 -14.6080 C 0 0 0 0 0 0 0 0 0 0 0 0 0 0 0 0 0 0
59.3770 37.5520 -15.4450 H 0 0 0 0 0 0 0 0 0 0 0 0 0 0 0 0 0 0
59.8500 36.7550 -13.9180 H 0 0 0 0 0 0 0 0 0 0 0 0 0 0 0 0 0 0
58.5510 35.6180 -15.1540 C 0 0 0 0 0 0 0 0 0 0 0 0 0 0 0 0 0 0
59.5770 35.0160 -15.8210 O 0 0 0 0 0 0 0 0 0 0 0 0 0 0 0 0 0 0
59.2670 33.7660 -16.4540 C 0 0 0 0 0 0 0 0 0 0 0 0 0 0 0 0 0 0
58.2840 33.8010 -16.9410 H 0 0 0 0 0 0 0 0 0 0 0 0 0 0 0 0 0 0
59.9930 33.6210 -17.2620 H 0 0 0 0 0 0 0 0 0 0 0 0 0 0 0 0 0 0
59.3590 32.6070 -15.4680 C 0 0 0 0 0 0 0 0 0 0 0 0 0 0 0 0 0 0
60.3570 32.6030 -15.0120 H 0 0 0 0 0 0 0 0 0 0 0 0 0 0 0 0 0 0
58.6100 32.7320 -14.6770 H 0 0 0 0 0 0 0 0 0 0 0 0 0 0 0 0 0 0
57.4290 35.1520 -15.0190 O 0 0 0 0 0 0 0 0 0 0 0 0 0 0 0 0 0 0
59.1270 31.3980 -16.1870 O 0 0 0 0 0 0 0 0 0 0 0 0 0 0 0 0 0 0
59.2070 30.2270 -15.4860 C 0 0 0 0 0 0 0 0 0 0 0 0 0 0 0 0 0 0

```











|         |          |         |   |   |   |   |   |   |   |   |   |   |   |   |
|---------|----------|---------|---|---|---|---|---|---|---|---|---|---|---|---|
| 87.1350 | -24.1910 | 3.2150  | C | 0 | 0 | 0 | 0 | 0 | 0 | 0 | 0 | 0 | 0 | 0 |
| 86.8410 | -23.1600 | 3.3880  | H | 0 | 0 | 0 | 0 | 0 | 0 | 0 | 0 | 0 | 0 | 0 |
| 89.1720 | -26.1170 | 0.5280  | C | 0 | 0 | 0 | 0 | 0 | 0 | 0 | 0 | 0 | 0 | 0 |
| 90.4850 | -26.8380 | 0.9190  | C | 0 | 0 | 0 | 0 | 0 | 0 | 0 | 0 | 0 | 0 | 0 |
| 88.2540 | -26.9550 | -0.4020 | C | 0 | 0 | 0 | 0 | 0 | 0 | 0 | 0 | 0 | 0 | 0 |
| 87.9790 | -27.9190 | 0.0420  | H | 0 | 0 | 0 | 0 | 0 | 0 | 0 | 0 | 0 | 0 | 0 |
| 88.7340 | -27.1620 | -1.3660 | H | 0 | 0 | 0 | 0 | 0 | 0 | 0 | 0 | 0 | 0 | 0 |
| 87.3190 | -26.4220 | -0.6190 | H | 0 | 0 | 0 | 0 | 0 | 0 | 0 | 0 | 0 | 0 | 0 |
| 89.5930 | -24.8750 | -0.3040 | C | 0 | 0 | 0 | 0 | 0 | 0 | 0 | 0 | 0 | 0 | 0 |
| 88.7220 | -24.3360 | -0.6960 | H | 0 | 0 | 0 | 0 | 0 | 0 | 0 | 0 | 0 | 0 | 0 |
| 90.1850 | -24.1620 | 0.2830  | H | 0 | 0 | 0 | 0 | 0 | 0 | 0 | 0 | 0 | 0 | 0 |
| 90.2050 | -25.1660 | -1.1670 | H | 0 | 0 | 0 | 0 | 0 | 0 | 0 | 0 | 0 | 0 | 0 |
| 91.3430 | -26.2570 | 1.8720  | C | 0 | 0 | 0 | 0 | 0 | 0 | 0 | 0 | 0 | 0 | 0 |
| 91.0780 | -25.3170 | 2.3520  | H | 0 | 0 | 0 | 0 | 0 | 0 | 0 | 0 | 0 | 0 | 0 |
| 92.5520 | -26.8650 | 2.2240  | C | 0 | 0 | 0 | 0 | 0 | 0 | 0 | 0 | 0 | 0 | 0 |
| 93.1940 | -26.3920 | 2.9630  | H | 0 | 0 | 0 | 0 | 0 | 0 | 0 | 0 | 0 | 0 | 0 |
| 92.9490 | -28.0620 | 1.6290  | C | 0 | 0 | 0 | 0 | 0 | 0 | 0 | 0 | 0 | 0 | 0 |
| 92.1070 | -28.6590 | 0.6940  | C | 0 | 0 | 0 | 0 | 0 | 0 | 0 | 0 | 0 | 0 | 0 |
| 92.3560 | -29.6020 | 0.2190  | H | 0 | 0 | 0 | 0 | 0 | 0 | 0 | 0 | 0 | 0 | 0 |
| 90.8910 | -28.0520 | 0.3420  | C | 0 | 0 | 0 | 0 | 0 | 0 | 0 | 0 | 0 | 0 | 0 |
| 90.2800 | -28.5580 | -0.4010 | H | 0 | 0 | 0 | 0 | 0 | 0 | 0 | 0 | 0 | 0 | 0 |
| 94.1540 | -28.5420 | 2.0580  | O | 0 | 0 | 0 | 0 | 0 | 0 | 0 | 0 | 0 | 0 | 0 |

|    |    |   |   |   |   |   |
|----|----|---|---|---|---|---|
| 1  | 2  | 1 | 0 | 0 | 0 | 0 |
| 1  | 7  | 1 | 0 | 0 | 0 | 0 |
| 1  | 9  | 1 | 0 | 0 | 0 | 0 |
| 2  | 3  | 1 | 0 | 0 | 0 | 0 |
| 2  | 4  | 2 | 0 | 0 | 0 | 0 |
| 4  | 5  | 1 | 0 | 0 | 0 | 0 |
| 4  | 6  | 1 | 0 | 0 | 0 | 0 |
| 6  | 7  | 2 | 0 | 0 | 0 | 0 |
| 7  | 8  | 1 | 0 | 0 | 0 | 0 |
| 9  | 10 | 1 | 0 | 0 | 0 | 0 |
| 9  | 11 | 1 | 0 | 0 | 0 | 0 |
| 9  | 12 | 1 | 0 | 0 | 0 | 0 |
| 12 | 13 | 1 | 0 | 0 | 0 | 0 |
| 12 | 14 | 1 | 0 | 0 | 0 | 0 |
| 12 | 15 | 1 | 0 | 0 | 0 | 0 |
| 15 | 16 | 1 | 0 | 0 | 0 | 0 |
| 15 | 17 | 1 | 0 | 0 | 0 | 0 |
| 15 | 18 | 1 | 0 | 0 | 0 | 0 |
| 18 | 19 | 1 | 0 | 0 | 0 | 0 |
| 18 | 35 | 1 | 0 | 0 | 0 | 0 |
| 20 | 21 | 1 | 0 | 0 | 0 | 0 |
| 20 | 22 | 1 | 0 | 0 | 0 | 0 |
| 20 | 23 | 1 | 0 | 0 | 0 | 0 |
| 20 | 32 | 1 | 0 | 0 | 0 | 0 |
| 23 | 24 | 1 | 0 | 0 | 0 | 0 |
| 24 | 25 | 1 | 0 | 0 | 0 | 0 |
| 24 | 31 | 2 | 0 | 0 | 0 | 0 |
| 25 | 26 | 1 | 0 | 0 | 0 | 0 |
| 25 | 27 | 1 | 0 | 0 | 0 | 0 |
| 25 | 28 | 1 | 0 | 0 | 0 | 0 |
| 28 | 29 | 1 | 0 | 0 | 0 | 0 |
| 28 | 30 | 1 | 0 | 0 | 0 | 0 |
| 28 | 98 | 1 | 0 | 0 | 0 | 0 |
| 32 | 33 | 1 | 0 | 0 | 0 | 0 |
| 32 | 34 | 1 | 0 | 0 | 0 | 0 |
| 32 | 80 | 1 | 0 | 0 | 0 | 0 |
| 35 | 36 | 1 | 0 | 0 | 0 | 0 |
| 35 | 37 | 1 | 0 | 0 | 0 | 0 |
| 35 | 38 | 1 | 0 | 0 | 0 | 0 |
| 38 | 39 | 1 | 0 | 0 | 0 | 0 |
| 38 | 40 | 1 | 0 | 0 | 0 | 0 |
| 38 | 41 | 1 | 0 | 0 | 0 | 0 |
| 41 | 42 | 1 | 0 | 0 | 0 | 0 |
| 41 | 49 | 2 | 0 | 0 | 0 | 0 |
| 42 | 43 | 1 | 0 | 0 | 0 | 0 |
| 43 | 44 | 1 | 0 | 0 | 0 | 0 |
| 43 | 45 | 1 | 0 | 0 | 0 | 0 |
| 43 | 46 | 1 | 0 | 0 | 0 | 0 |
| 46 | 47 | 1 | 0 | 0 | 0 | 0 |
| 46 | 48 | 1 | 0 | 0 | 0 | 0 |
| 46 | 50 | 1 | 0 | 0 | 0 | 0 |
| 50 | 51 | 1 | 0 | 0 | 0 | 0 |
| 51 | 52 | 1 | 0 | 0 | 0 | 0 |
| 51 | 59 | 2 | 0 | 0 | 0 | 0 |
| 52 | 53 | 1 | 0 | 0 | 0 | 0 |
| 52 | 54 | 2 | 0 | 0 | 0 | 0 |
| 54 | 55 | 1 | 0 | 0 | 0 | 0 |
| 54 | 56 | 1 | 0 | 0 | 0 | 0 |
| 56 | 57 | 2 | 0 | 0 | 0 | 0 |

|     |     |   |   |   |   |   |
|-----|-----|---|---|---|---|---|
| 56  | 61  | 1 | 0 | 0 | 0 | 0 |
| 57  | 58  | 1 | 0 | 0 | 0 | 0 |
| 57  | 59  | 1 | 0 | 0 | 0 | 0 |
| 59  | 60  | 1 | 0 | 0 | 0 | 0 |
| 61  | 62  | 1 | 0 | 0 | 0 | 0 |
| 61  | 63  | 1 | 0 | 0 | 0 | 0 |
| 61  | 67  | 1 | 0 | 0 | 0 | 0 |
| 62  | 71  | 1 | 0 | 0 | 0 | 0 |
| 62  | 78  | 2 | 0 | 0 | 0 | 0 |
| 63  | 64  | 1 | 0 | 0 | 0 | 0 |
| 63  | 65  | 1 | 0 | 0 | 0 | 0 |
| 63  | 66  | 1 | 0 | 0 | 0 | 0 |
| 67  | 68  | 1 | 0 | 0 | 0 | 0 |
| 67  | 69  | 1 | 0 | 0 | 0 | 0 |
| 67  | 70  | 1 | 0 | 0 | 0 | 0 |
| 71  | 72  | 1 | 0 | 0 | 0 | 0 |
| 71  | 73  | 2 | 0 | 0 | 0 | 0 |
| 73  | 74  | 1 | 0 | 0 | 0 | 0 |
| 73  | 75  | 1 | 0 | 0 | 0 | 0 |
| 75  | 76  | 2 | 0 | 0 | 0 | 0 |
| 75  | 80  | 1 | 0 | 0 | 0 | 0 |
| 76  | 77  | 1 | 0 | 0 | 0 | 0 |
| 76  | 78  | 1 | 0 | 0 | 0 | 0 |
| 78  | 79  | 1 | 0 | 0 | 0 | 0 |
| 81  | 82  | 1 | 0 | 0 | 0 | 0 |
| 81  | 87  | 1 | 0 | 0 | 0 | 0 |
| 81  | 89  | 1 | 0 | 0 | 0 | 0 |
| 82  | 83  | 1 | 0 | 0 | 0 | 0 |
| 82  | 84  | 2 | 0 | 0 | 0 | 0 |
| 84  | 85  | 1 | 0 | 0 | 0 | 0 |
| 84  | 86  | 1 | 0 | 0 | 0 | 0 |
| 86  | 87  | 2 | 0 | 0 | 0 | 0 |
| 87  | 88  | 1 | 0 | 0 | 0 | 0 |
| 89  | 90  | 1 | 0 | 0 | 0 | 0 |
| 89  | 91  | 1 | 0 | 0 | 0 | 0 |
| 89  | 92  | 1 | 0 | 0 | 0 | 0 |
| 92  | 93  | 1 | 0 | 0 | 0 | 0 |
| 92  | 94  | 1 | 0 | 0 | 0 | 0 |
| 92  | 95  | 1 | 0 | 0 | 0 | 0 |
| 95  | 96  | 1 | 0 | 0 | 0 | 0 |
| 95  | 97  | 1 | 0 | 0 | 0 | 0 |
| 95  | 98  | 1 | 0 | 0 | 0 | 0 |
| 98  | 114 | 1 | 0 | 0 | 0 | 0 |
| 99  | 100 | 1 | 0 | 0 | 0 | 0 |
| 99  | 101 | 1 | 0 | 0 | 0 | 0 |
| 99  | 102 | 1 | 0 | 0 | 0 | 0 |
| 99  | 111 | 1 | 0 | 0 | 0 | 0 |
| 102 | 103 | 1 | 0 | 0 | 0 | 0 |
| 103 | 104 | 1 | 0 | 0 | 0 | 0 |
| 103 | 110 | 2 | 0 | 0 | 0 | 0 |
| 104 | 105 | 1 | 0 | 0 | 0 | 0 |
| 104 | 106 | 1 | 0 | 0 | 0 | 0 |
| 104 | 107 | 1 | 0 | 0 | 0 | 0 |
| 107 | 108 | 1 | 0 | 0 | 0 | 0 |
| 107 | 109 | 1 | 0 | 0 | 0 | 0 |
| 107 | 177 | 1 | 0 | 0 | 0 | 0 |
| 111 | 112 | 1 | 0 | 0 | 0 | 0 |
| 111 | 113 | 1 | 0 | 0 | 0 | 0 |
| 111 | 159 | 1 | 0 | 0 | 0 | 0 |
| 114 | 115 | 1 | 0 | 0 | 0 | 0 |
| 114 | 116 | 1 | 0 | 0 | 0 | 0 |
| 114 | 117 | 1 | 0 | 0 | 0 | 0 |
| 117 | 118 | 1 | 0 | 0 | 0 | 0 |
| 117 | 119 | 1 | 0 | 0 | 0 | 0 |
| 117 | 120 | 1 | 0 | 0 | 0 | 0 |
| 120 | 121 | 1 | 0 | 0 | 0 | 0 |
| 120 | 128 | 2 | 0 | 0 | 0 | 0 |
| 121 | 122 | 1 | 0 | 0 | 0 | 0 |
| 122 | 123 | 1 | 0 | 0 | 0 | 0 |
| 122 | 124 | 1 | 0 | 0 | 0 | 0 |
| 122 | 125 | 1 | 0 | 0 | 0 | 0 |
| 125 | 126 | 1 | 0 | 0 | 0 | 0 |
| 125 | 127 | 1 | 0 | 0 | 0 | 0 |
| 125 | 129 | 1 | 0 | 0 | 0 | 0 |
| 129 | 130 | 1 | 0 | 0 | 0 | 0 |
| 130 | 131 | 1 | 0 | 0 | 0 | 0 |
| 130 | 138 | 2 | 0 | 0 | 0 | 0 |
| 131 | 132 | 1 | 0 | 0 | 0 | 0 |
| 131 | 133 | 2 | 0 | 0 | 0 | 0 |
| 133 | 134 | 1 | 0 | 0 | 0 | 0 |
| 133 | 135 | 1 | 0 | 0 | 0 | 0 |

|        |   |   |   |   |   |
|--------|---|---|---|---|---|
| 135136 | 2 | 0 | 0 | 0 | 0 |
| 135140 | 1 | 0 | 0 | 0 | 0 |
| 136137 | 1 | 0 | 0 | 0 | 0 |
| 136138 | 1 | 0 | 0 | 0 | 0 |
| 138139 | 1 | 0 | 0 | 0 | 0 |
| 140141 | 1 | 0 | 0 | 0 | 0 |
| 140142 | 1 | 0 | 0 | 0 | 0 |
| 140146 | 1 | 0 | 0 | 0 | 0 |
| 141150 | 1 | 0 | 0 | 0 | 0 |
| 141157 | 2 | 0 | 0 | 0 | 0 |
| 142143 | 1 | 0 | 0 | 0 | 0 |
| 142144 | 1 | 0 | 0 | 0 | 0 |
| 142145 | 1 | 0 | 0 | 0 | 0 |
| 146147 | 1 | 0 | 0 | 0 | 0 |
| 146148 | 1 | 0 | 0 | 0 | 0 |
| 146149 | 1 | 0 | 0 | 0 | 0 |
| 150151 | 1 | 0 | 0 | 0 | 0 |
| 150152 | 2 | 0 | 0 | 0 | 0 |
| 152153 | 1 | 0 | 0 | 0 | 0 |
| 152154 | 1 | 0 | 0 | 0 | 0 |
| 154155 | 2 | 0 | 0 | 0 | 0 |
| 154159 | 1 | 0 | 0 | 0 | 0 |
| 155156 | 1 | 0 | 0 | 0 | 0 |
| 155157 | 1 | 0 | 0 | 0 | 0 |
| 157158 | 1 | 0 | 0 | 0 | 0 |
| 160161 | 1 | 0 | 0 | 0 | 0 |
| 160166 | 1 | 0 | 0 | 0 | 0 |
| 160168 | 1 | 0 | 0 | 0 | 0 |
| 161162 | 1 | 0 | 0 | 0 | 0 |
| 161163 | 2 | 0 | 0 | 0 | 0 |
| 163164 | 1 | 0 | 0 | 0 | 0 |
| 163165 | 1 | 0 | 0 | 0 | 0 |
| 165166 | 2 | 0 | 0 | 0 | 0 |
| 166167 | 1 | 0 | 0 | 0 | 0 |
| 168169 | 1 | 0 | 0 | 0 | 0 |
| 168170 | 1 | 0 | 0 | 0 | 0 |
| 168171 | 1 | 0 | 0 | 0 | 0 |
| 171172 | 1 | 0 | 0 | 0 | 0 |
| 171173 | 1 | 0 | 0 | 0 | 0 |
| 171174 | 1 | 0 | 0 | 0 | 0 |
| 174175 | 1 | 0 | 0 | 0 | 0 |
| 174176 | 1 | 0 | 0 | 0 | 0 |
| 174177 | 1 | 0 | 0 | 0 | 0 |
| 177193 | 1 | 0 | 0 | 0 | 0 |
| 178179 | 1 | 0 | 0 | 0 | 0 |
| 178180 | 1 | 0 | 0 | 0 | 0 |
| 178181 | 1 | 0 | 0 | 0 | 0 |
| 178190 | 1 | 0 | 0 | 0 | 0 |
| 181182 | 1 | 0 | 0 | 0 | 0 |
| 182183 | 1 | 0 | 0 | 0 | 0 |
| 182189 | 2 | 0 | 0 | 0 | 0 |
| 183184 | 1 | 0 | 0 | 0 | 0 |
| 183185 | 1 | 0 | 0 | 0 | 0 |
| 183186 | 1 | 0 | 0 | 0 | 0 |
| 186187 | 1 | 0 | 0 | 0 | 0 |
| 186188 | 1 | 0 | 0 | 0 | 0 |
| 186256 | 1 | 0 | 0 | 0 | 0 |
| 190191 | 1 | 0 | 0 | 0 | 0 |
| 190192 | 1 | 0 | 0 | 0 | 0 |
| 190238 | 1 | 0 | 0 | 0 | 0 |
| 193194 | 1 | 0 | 0 | 0 | 0 |
| 193195 | 1 | 0 | 0 | 0 | 0 |
| 193196 | 1 | 0 | 0 | 0 | 0 |
| 196197 | 1 | 0 | 0 | 0 | 0 |
| 196198 | 1 | 0 | 0 | 0 | 0 |
| 196199 | 1 | 0 | 0 | 0 | 0 |
| 199200 | 1 | 0 | 0 | 0 | 0 |
| 199207 | 2 | 0 | 0 | 0 | 0 |
| 200201 | 1 | 0 | 0 | 0 | 0 |
| 201202 | 1 | 0 | 0 | 0 | 0 |
| 201203 | 1 | 0 | 0 | 0 | 0 |
| 201204 | 1 | 0 | 0 | 0 | 0 |
| 204205 | 1 | 0 | 0 | 0 | 0 |
| 204206 | 1 | 0 | 0 | 0 | 0 |
| 204208 | 1 | 0 | 0 | 0 | 0 |
| 208209 | 1 | 0 | 0 | 0 | 0 |
| 209210 | 1 | 0 | 0 | 0 | 0 |
| 209217 | 2 | 0 | 0 | 0 | 0 |
| 210211 | 1 | 0 | 0 | 0 | 0 |
| 210212 | 2 | 0 | 0 | 0 | 0 |
| 212213 | 1 | 0 | 0 | 0 | 0 |

|        |   |   |   |   |   |
|--------|---|---|---|---|---|
| 212214 | 1 | 0 | 0 | 0 | 0 |
| 214215 | 2 | 0 | 0 | 0 | 0 |
| 214219 | 1 | 0 | 0 | 0 | 0 |
| 215216 | 1 | 0 | 0 | 0 | 0 |
| 215217 | 1 | 0 | 0 | 0 | 0 |
| 217218 | 1 | 0 | 0 | 0 | 0 |
| 219220 | 1 | 0 | 0 | 0 | 0 |
| 219221 | 1 | 0 | 0 | 0 | 0 |
| 219225 | 1 | 0 | 0 | 0 | 0 |
| 220229 | 1 | 0 | 0 | 0 | 0 |
| 220236 | 2 | 0 | 0 | 0 | 0 |
| 221222 | 1 | 0 | 0 | 0 | 0 |
| 221223 | 1 | 0 | 0 | 0 | 0 |
| 221224 | 1 | 0 | 0 | 0 | 0 |
| 225226 | 1 | 0 | 0 | 0 | 0 |
| 225227 | 1 | 0 | 0 | 0 | 0 |
| 225228 | 1 | 0 | 0 | 0 | 0 |
| 229230 | 1 | 0 | 0 | 0 | 0 |
| 229231 | 2 | 0 | 0 | 0 | 0 |
| 231232 | 1 | 0 | 0 | 0 | 0 |
| 231233 | 1 | 0 | 0 | 0 | 0 |
| 233234 | 2 | 0 | 0 | 0 | 0 |
| 233238 | 1 | 0 | 0 | 0 | 0 |
| 234235 | 1 | 0 | 0 | 0 | 0 |
| 234236 | 1 | 0 | 0 | 0 | 0 |
| 236237 | 1 | 0 | 0 | 0 | 0 |
| 239240 | 1 | 0 | 0 | 0 | 0 |
| 239245 | 1 | 0 | 0 | 0 | 0 |
| 239247 | 1 | 0 | 0 | 0 | 0 |
| 240241 | 1 | 0 | 0 | 0 | 0 |
| 240242 | 2 | 0 | 0 | 0 | 0 |
| 242243 | 1 | 0 | 0 | 0 | 0 |
| 242244 | 1 | 0 | 0 | 0 | 0 |
| 244245 | 2 | 0 | 0 | 0 | 0 |
| 245246 | 1 | 0 | 0 | 0 | 0 |
| 247248 | 1 | 0 | 0 | 0 | 0 |
| 247249 | 1 | 0 | 0 | 0 | 0 |
| 247250 | 1 | 0 | 0 | 0 | 0 |
| 250251 | 1 | 0 | 0 | 0 | 0 |
| 250252 | 1 | 0 | 0 | 0 | 0 |
| 250253 | 1 | 0 | 0 | 0 | 0 |
| 253254 | 1 | 0 | 0 | 0 | 0 |
| 253255 | 1 | 0 | 0 | 0 | 0 |
| 253256 | 1 | 0 | 0 | 0 | 0 |
| 256272 | 1 | 0 | 0 | 0 | 0 |
| 257258 | 1 | 0 | 0 | 0 | 0 |
| 257259 | 1 | 0 | 0 | 0 | 0 |
| 257260 | 1 | 0 | 0 | 0 | 0 |
| 257269 | 1 | 0 | 0 | 0 | 0 |
| 260261 | 1 | 0 | 0 | 0 | 0 |
| 261262 | 1 | 0 | 0 | 0 | 0 |
| 261268 | 2 | 0 | 0 | 0 | 0 |
| 262263 | 1 | 0 | 0 | 0 | 0 |
| 262264 | 1 | 0 | 0 | 0 | 0 |
| 262265 | 1 | 0 | 0 | 0 | 0 |
| 265266 | 1 | 0 | 0 | 0 | 0 |
| 265267 | 1 | 0 | 0 | 0 | 0 |
| 265335 | 1 | 0 | 0 | 0 | 0 |
| 269270 | 1 | 0 | 0 | 0 | 0 |
| 269271 | 1 | 0 | 0 | 0 | 0 |
| 269317 | 1 | 0 | 0 | 0 | 0 |
| 272273 | 1 | 0 | 0 | 0 | 0 |
| 272274 | 1 | 0 | 0 | 0 | 0 |
| 272275 | 1 | 0 | 0 | 0 | 0 |
| 275276 | 1 | 0 | 0 | 0 | 0 |
| 275277 | 1 | 0 | 0 | 0 | 0 |
| 275278 | 1 | 0 | 0 | 0 | 0 |
| 278279 | 1 | 0 | 0 | 0 | 0 |
| 278286 | 2 | 0 | 0 | 0 | 0 |
| 279280 | 1 | 0 | 0 | 0 | 0 |
| 280281 | 1 | 0 | 0 | 0 | 0 |
| 280282 | 1 | 0 | 0 | 0 | 0 |
| 280283 | 1 | 0 | 0 | 0 | 0 |
| 283284 | 1 | 0 | 0 | 0 | 0 |
| 283285 | 1 | 0 | 0 | 0 | 0 |
| 283287 | 1 | 0 | 0 | 0 | 0 |
| 287288 | 1 | 0 | 0 | 0 | 0 |
| 288289 | 1 | 0 | 0 | 0 | 0 |
| 288296 | 2 | 0 | 0 | 0 | 0 |
| 289290 | 1 | 0 | 0 | 0 | 0 |
| 289291 | 2 | 0 | 0 | 0 | 0 |

|        |   |   |   |   |   |
|--------|---|---|---|---|---|
| 291292 | 1 | 0 | 0 | 0 | 0 |
| 291293 | 1 | 0 | 0 | 0 | 0 |
| 293294 | 2 | 0 | 0 | 0 | 0 |
| 293298 | 1 | 0 | 0 | 0 | 0 |
| 294295 | 1 | 0 | 0 | 0 | 0 |
| 294296 | 1 | 0 | 0 | 0 | 0 |
| 296297 | 1 | 0 | 0 | 0 | 0 |
| 298299 | 1 | 0 | 0 | 0 | 0 |
| 298300 | 1 | 0 | 0 | 0 | 0 |
| 298304 | 1 | 0 | 0 | 0 | 0 |
| 299308 | 1 | 0 | 0 | 0 | 0 |
| 299315 | 2 | 0 | 0 | 0 | 0 |
| 300301 | 1 | 0 | 0 | 0 | 0 |
| 300302 | 1 | 0 | 0 | 0 | 0 |
| 300303 | 1 | 0 | 0 | 0 | 0 |
| 304305 | 1 | 0 | 0 | 0 | 0 |
| 304306 | 1 | 0 | 0 | 0 | 0 |
| 304307 | 1 | 0 | 0 | 0 | 0 |
| 308309 | 1 | 0 | 0 | 0 | 0 |
| 308310 | 2 | 0 | 0 | 0 | 0 |
| 310311 | 1 | 0 | 0 | 0 | 0 |
| 310312 | 1 | 0 | 0 | 0 | 0 |
| 312313 | 2 | 0 | 0 | 0 | 0 |
| 312317 | 1 | 0 | 0 | 0 | 0 |
| 313314 | 1 | 0 | 0 | 0 | 0 |
| 313315 | 1 | 0 | 0 | 0 | 0 |
| 315316 | 1 | 0 | 0 | 0 | 0 |
| 318319 | 1 | 0 | 0 | 0 | 0 |
| 318324 | 1 | 0 | 0 | 0 | 0 |
| 318326 | 1 | 0 | 0 | 0 | 0 |
| 319320 | 1 | 0 | 0 | 0 | 0 |
| 319321 | 2 | 0 | 0 | 0 | 0 |
| 321322 | 1 | 0 | 0 | 0 | 0 |
| 321323 | 1 | 0 | 0 | 0 | 0 |
| 323324 | 2 | 0 | 0 | 0 | 0 |
| 324325 | 1 | 0 | 0 | 0 | 0 |
| 326327 | 1 | 0 | 0 | 0 | 0 |
| 326328 | 1 | 0 | 0 | 0 | 0 |
| 326329 | 1 | 0 | 0 | 0 | 0 |
| 329330 | 1 | 0 | 0 | 0 | 0 |
| 329331 | 1 | 0 | 0 | 0 | 0 |
| 329332 | 1 | 0 | 0 | 0 | 0 |
| 332333 | 1 | 0 | 0 | 0 | 0 |
| 332334 | 1 | 0 | 0 | 0 | 0 |
| 332335 | 1 | 0 | 0 | 0 | 0 |
| 335352 | 1 | 0 | 0 | 0 | 0 |
| 336337 | 1 | 0 | 0 | 0 | 0 |
| 336338 | 1 | 0 | 0 | 0 | 0 |
| 336339 | 1 | 0 | 0 | 0 | 0 |
| 336349 | 1 | 0 | 0 | 0 | 0 |
| 339340 | 1 | 0 | 0 | 0 | 0 |
| 340341 | 1 | 0 | 0 | 0 | 0 |
| 340348 | 2 | 0 | 0 | 0 | 0 |
| 341342 | 1 | 0 | 0 | 0 | 0 |
| 341343 | 1 | 0 | 0 | 0 | 0 |
| 341344 | 1 | 0 | 0 | 0 | 0 |
| 344345 | 1 | 0 | 0 | 0 | 0 |
| 344346 | 1 | 0 | 0 | 0 | 0 |
| 344347 | 1 | 0 | 0 | 0 | 0 |
| 349350 | 1 | 0 | 0 | 0 | 0 |
| 349351 | 1 | 0 | 0 | 0 | 0 |
| 349397 | 1 | 0 | 0 | 0 | 0 |
| 352353 | 1 | 0 | 0 | 0 | 0 |
| 352354 | 1 | 0 | 0 | 0 | 0 |
| 352355 | 1 | 0 | 0 | 0 | 0 |
| 355356 | 1 | 0 | 0 | 0 | 0 |
| 355357 | 1 | 0 | 0 | 0 | 0 |
| 355358 | 1 | 0 | 0 | 0 | 0 |
| 358359 | 1 | 0 | 0 | 0 | 0 |
| 358366 | 2 | 0 | 0 | 0 | 0 |
| 359360 | 1 | 0 | 0 | 0 | 0 |
| 360361 | 1 | 0 | 0 | 0 | 0 |
| 360362 | 1 | 0 | 0 | 0 | 0 |
| 360363 | 1 | 0 | 0 | 0 | 0 |
| 363364 | 1 | 0 | 0 | 0 | 0 |
| 363365 | 1 | 0 | 0 | 0 | 0 |
| 363367 | 1 | 0 | 0 | 0 | 0 |
| 367368 | 1 | 0 | 0 | 0 | 0 |
| 368369 | 1 | 0 | 0 | 0 | 0 |
| 368376 | 2 | 0 | 0 | 0 | 0 |
| 369370 | 1 | 0 | 0 | 0 | 0 |



```

369371 2 0 0 0 0
371372 1 0 0 0 0
371373 1 0 0 0 0
373374 2 0 0 0 0
373378 1 0 0 0 0
374375 1 0 0 0 0
374376 1 0 0 0 0
376377 1 0 0 0 0
378379 1 0 0 0 0
378380 1 0 0 0 0
378384 1 0 0 0 0
379388 1 0 0 0 0
379395 2 0 0 0 0
380381 1 0 0 0 0
380382 1 0 0 0 0
380383 1 0 0 0 0
384385 1 0 0 0 0
384386 1 0 0 0 0
384387 1 0 0 0 0
388389 1 0 0 0 0
388390 2 0 0 0 0
390391 1 0 0 0 0
390392 1 0 0 0 0
392393 2 0 0 0 0
392397 1 0 0 0 0
393394 1 0 0 0 0
393395 1 0 0 0 0
395396 1 0 0 0 0

```

```

M END
> <NAME>
D93_1

```

```

$$$$
D94_1
MOE2012 3D

```

```

382396 0 0 1 0 0 0 0 0999 V2000
10.7560 15.2430 -7.8240 N 0 0 0 0 0 0 0 0 0 0 0 0 0 0 0
10.1250 16.4300 -8.0710 C 0 0 0 0 0 0 0 0 0 0 0 0 0 0 0
10.4280 17.1030 -8.8600 H 0 0 0 0 0 0 0 0 0 0 0 0 0 0 0
9.1170 16.4930 -7.1360 C 0 0 0 0 0 0 0 0 0 0 0 0 0 0 0
8.3860 17.2780 -7.0000 H 0 0 0 0 0 0 0 0 0 0 0 0 0 0 0
9.1250 15.3810 -6.3310 N 0 0 0 0 0 0 0 0 0 0 0 0 0 0 0
10.1250 14.6480 -6.7690 C 0 0 0 0 0 0 0 0 0 0 0 0 0 0 0
10.4250 13.6910 -6.3650 H 0 0 0 0 0 0 0 0 0 0 0 0 0 0 0
11.8830 14.7040 -8.5590 C 0 0 0 0 0 0 0 0 0 0 0 0 0 0 0
11.8370 13.6120 -8.4790 H 0 0 0 0 0 0 0 0 0 0 0 0 0 0 0
11.7350 14.9640 -9.6140 H 0 0 0 0 0 0 0 0 0 0 0 0 0 0 0
13.2270 15.2350 -8.0470 C 0 0 0 0 0 0 0 0 0 0 0 0 0 0 0
13.2310 16.3290 -8.1200 H 0 0 0 0 0 0 0 0 0 0 0 0 0 0 0
13.3500 14.9730 -6.9900 H 0 0 0 0 0 0 0 0 0 0 0 0 0 0 0
14.3180 14.6730 -8.8470 N 0 0 3 0 0 0 0 0 0 0 0 0 0 0 0
14.3690 13.6610 -8.7220 H 0 0 0 0 0 0 0 0 0 0 0 0 0 0 0
31.8980 18.0070 -8.8400 C 0 0 0 0 0 0 0 0 0 0 0 0 0 0 0
31.4580 17.6930 -7.8870 H 0 0 0 0 0 0 0 0 0 0 0 0 0 0 0
31.5440 19.0320 -9.0070 H 0 0 0 0 0 0 0 0 0 0 0 0 0 0 0
33.3250 17.9700 -8.6780 O 0 0 0 0 0 0 0 0 0 0 0 0 0 0 0
34.0460 18.7490 -9.5370 C 0 0 0 0 0 0 0 0 0 0 0 0 0 0 0
35.5160 18.5720 -9.2490 C 0 0 0 0 0 0 0 0 0 0 0 0 0 0 0
35.7180 18.9460 -8.2390 H 0 0 0 0 0 0 0 0 0 0 0 0 0 0 0
35.7230 17.4970 -9.2880 H 0 0 0 0 0 0 0 0 0 0 0 0 0 0 0
36.3700 19.3230 -10.2730 C 0 0 0 0 0 0 0 0 0 0 0 0 0 0 0
36.1420 18.9660 -11.2860 H 0 0 0 0 0 0 0 0 0 0 0 0 0 0 0
36.0590 20.3770 -10.2470 H 0 0 0 0 0 0 0 0 0 0 0 0 0 0 0
33.5720 19.4570 -10.4120 O 0 0 0 0 0 0 0 0 0 0 0 0 0 0 0
31.4540 17.0750 -9.9640 C 0 0 0 0 0 0 0 0 0 0 0 0 0 0 0
31.8350 17.4600 -10.9170 H 0 0 0 0 0 0 0 0 0 0 0 0 0 0 0
31.8980 16.0760 -9.8740 H 0 0 0 0 0 0 0 0 0 0 0 0 0 0 0
15.6220 15.2800 -8.5640 C 0 0 0 0 0 0 0 0 0 0 0 0 0 0 0
16.2930 14.9970 -9.3840 H 0 0 0 0 0 0 0 0 0 0 0 0 0 0 0
15.5520 16.3740 -8.6040 H 0 0 0 0 0 0 0 0 0 0 0 0 0 0 0
16.2400 14.8240 -7.2420 C 0 0 0 0 0 0 0 0 0 0 0 0 0 0 0
15.6350 15.1660 -6.3960 H 0 0 0 0 0 0 0 0 0 0 0 0 0 0 0
16.3060 13.7300 -7.2190 H 0 0 0 0 0 0 0 0 0 0 0 0 0 0 0
17.6340 15.3830 -7.0760 C 0 0 0 0 0 0 0 0 0 0 0 0 0 0 0
18.1910 14.8870 -5.9340 O 0 0 0 0 0 0 0 0 0 0 0 0 0 0 0
19.5010 15.3780 -5.6070 C 0 0 0 0 0 0 0 0 0 0 0 0 0 0 0
19.5780 16.4570 -5.7940 H 0 0 0 0 0 0 0 0 0 0 0 0 0 0 0
19.6330 15.2550 -4.5260 H 0 0 0 0 0 0 0 0 0 0 0 0 0 0 0
20.5850 14.6040 -6.3480 C 0 0 0 0 0 0 0 0 0 0 0 0 0 0 0
20.4740 13.5350 -6.1300 H 0 0 0 0 0 0 0 0 0 0 0 0 0 0 0

```









|          |         |         |   |   |   |   |   |   |   |   |   |   |   |   |   |
|----------|---------|---------|---|---|---|---|---|---|---|---|---|---|---|---|---|
| 108.2900 | -0.1470 | -5.8430 | C | 0 | 0 | 0 | 0 | 0 | 0 | 0 | 0 | 0 | 0 | 0 | 0 |
| 107.9440 | -0.8510 | -5.0770 | H | 0 | 0 | 0 | 0 | 0 | 0 | 0 | 0 | 0 | 0 | 0 | 0 |
| 107.5080 | -0.0820 | -6.6090 | H | 0 | 0 | 0 | 0 | 0 | 0 | 0 | 0 | 0 | 0 | 0 | 0 |
| 109.1690 | -0.5980 | -6.3210 | H | 0 | 0 | 0 | 0 | 0 | 0 | 0 | 0 | 0 | 0 | 0 | 0 |
| 108.3680 | 2.5320  | -7.4240 | C | 0 | 0 | 0 | 0 | 0 | 0 | 0 | 0 | 0 | 0 | 0 | 0 |
| 107.3040 | 2.3020  | -7.4010 | H | 0 | 0 | 0 | 0 | 0 | 0 | 0 | 0 | 0 | 0 | 0 | 0 |
| 108.8630 | 3.2760  | -8.4990 | C | 0 | 0 | 0 | 0 | 0 | 0 | 0 | 0 | 0 | 0 | 0 | 0 |
| 108.1840 | 3.6040  | -9.2810 | H | 0 | 0 | 0 | 0 | 0 | 0 | 0 | 0 | 0 | 0 | 0 | 0 |
| 110.2200 | 3.5890  | -8.5850 | C | 0 | 0 | 0 | 0 | 0 | 0 | 0 | 0 | 0 | 0 | 0 | 0 |
| 111.0720 | 3.1690  | -7.5680 | C | 0 | 0 | 0 | 0 | 0 | 0 | 0 | 0 | 0 | 0 | 0 | 0 |
| 112.1310 | 3.4020  | -7.5730 | H | 0 | 0 | 0 | 0 | 0 | 0 | 0 | 0 | 0 | 0 | 0 | 0 |
| 110.5760 | 2.4240  | -6.4860 | C | 0 | 0 | 0 | 0 | 0 | 0 | 0 | 0 | 0 | 0 | 0 | 0 |
| 111.2890 | 2.1140  | -5.7270 | H | 0 | 0 | 0 | 0 | 0 | 0 | 0 | 0 | 0 | 0 | 0 | 0 |
| 110.5680 | 4.3140  | -9.6900 | O | 0 | 0 | 0 | 0 | 0 | 0 | 0 | 0 | 0 | 0 | 0 | 0 |
| 1        | 2       | 1       | 0 | 0 | 0 | 0 | 0 | 0 | 0 | 0 | 0 | 0 | 0 | 0 | 0 |
| 1        | 7       | 1       | 0 | 0 | 0 | 0 | 0 | 0 | 0 | 0 | 0 | 0 | 0 | 0 | 0 |
| 1        | 9       | 1       | 0 | 0 | 0 | 0 | 0 | 0 | 0 | 0 | 0 | 0 | 0 | 0 | 0 |
| 2        | 3       | 1       | 0 | 0 | 0 | 0 | 0 | 0 | 0 | 0 | 0 | 0 | 0 | 0 | 0 |
| 2        | 4       | 2       | 0 | 0 | 0 | 0 | 0 | 0 | 0 | 0 | 0 | 0 | 0 | 0 | 0 |
| 4        | 5       | 1       | 0 | 0 | 0 | 0 | 0 | 0 | 0 | 0 | 0 | 0 | 0 | 0 | 0 |
| 4        | 6       | 1       | 0 | 0 | 0 | 0 | 0 | 0 | 0 | 0 | 0 | 0 | 0 | 0 | 0 |
| 6        | 7       | 2       | 0 | 0 | 0 | 0 | 0 | 0 | 0 | 0 | 0 | 0 | 0 | 0 | 0 |
| 7        | 8       | 1       | 0 | 0 | 0 | 0 | 0 | 0 | 0 | 0 | 0 | 0 | 0 | 0 | 0 |
| 9        | 10      | 1       | 0 | 0 | 0 | 0 | 0 | 0 | 0 | 0 | 0 | 0 | 0 | 0 | 0 |
| 9        | 11      | 1       | 0 | 0 | 0 | 0 | 0 | 0 | 0 | 0 | 0 | 0 | 0 | 0 | 0 |
| 9        | 12      | 1       | 0 | 0 | 0 | 0 | 0 | 0 | 0 | 0 | 0 | 0 | 0 | 0 | 0 |
| 12       | 13      | 1       | 0 | 0 | 0 | 0 | 0 | 0 | 0 | 0 | 0 | 0 | 0 | 0 | 0 |
| 12       | 14      | 1       | 0 | 0 | 0 | 0 | 0 | 0 | 0 | 0 | 0 | 0 | 0 | 0 | 0 |
| 12       | 15      | 1       | 0 | 0 | 0 | 0 | 0 | 0 | 0 | 0 | 0 | 0 | 0 | 0 | 0 |
| 15       | 16      | 1       | 0 | 0 | 0 | 0 | 0 | 0 | 0 | 0 | 0 | 0 | 0 | 0 | 0 |
| 15       | 32      | 1       | 0 | 0 | 0 | 0 | 0 | 0 | 0 | 0 | 0 | 0 | 0 | 0 | 0 |
| 17       | 18      | 1       | 0 | 0 | 0 | 0 | 0 | 0 | 0 | 0 | 0 | 0 | 0 | 0 | 0 |
| 17       | 19      | 1       | 0 | 0 | 0 | 0 | 0 | 0 | 0 | 0 | 0 | 0 | 0 | 0 | 0 |
| 17       | 20      | 1       | 0 | 0 | 0 | 0 | 0 | 0 | 0 | 0 | 0 | 0 | 0 | 0 | 0 |
| 17       | 29      | 1       | 0 | 0 | 0 | 0 | 0 | 0 | 0 | 0 | 0 | 0 | 0 | 0 | 0 |
| 20       | 21      | 1       | 0 | 0 | 0 | 0 | 0 | 0 | 0 | 0 | 0 | 0 | 0 | 0 | 0 |
| 21       | 22      | 1       | 0 | 0 | 0 | 0 | 0 | 0 | 0 | 0 | 0 | 0 | 0 | 0 | 0 |
| 21       | 28      | 2       | 0 | 0 | 0 | 0 | 0 | 0 | 0 | 0 | 0 | 0 | 0 | 0 | 0 |
| 22       | 23      | 1       | 0 | 0 | 0 | 0 | 0 | 0 | 0 | 0 | 0 | 0 | 0 | 0 | 0 |
| 22       | 24      | 1       | 0 | 0 | 0 | 0 | 0 | 0 | 0 | 0 | 0 | 0 | 0 | 0 | 0 |
| 22       | 25      | 1       | 0 | 0 | 0 | 0 | 0 | 0 | 0 | 0 | 0 | 0 | 0 | 0 | 0 |
| 25       | 26      | 1       | 0 | 0 | 0 | 0 | 0 | 0 | 0 | 0 | 0 | 0 | 0 | 0 | 0 |
| 25       | 27      | 1       | 0 | 0 | 0 | 0 | 0 | 0 | 0 | 0 | 0 | 0 | 0 | 0 | 0 |
| 25       | 92      | 1       | 0 | 0 | 0 | 0 | 0 | 0 | 0 | 0 | 0 | 0 | 0 | 0 | 0 |
| 29       | 30      | 1       | 0 | 0 | 0 | 0 | 0 | 0 | 0 | 0 | 0 | 0 | 0 | 0 | 0 |
| 29       | 31      | 1       | 0 | 0 | 0 | 0 | 0 | 0 | 0 | 0 | 0 | 0 | 0 | 0 | 0 |
| 29       | 77      | 1       | 0 | 0 | 0 | 0 | 0 | 0 | 0 | 0 | 0 | 0 | 0 | 0 | 0 |
| 32       | 33      | 1       | 0 | 0 | 0 | 0 | 0 | 0 | 0 | 0 | 0 | 0 | 0 | 0 | 0 |
| 32       | 34      | 1       | 0 | 0 | 0 | 0 | 0 | 0 | 0 | 0 | 0 | 0 | 0 | 0 | 0 |
| 32       | 35      | 1       | 0 | 0 | 0 | 0 | 0 | 0 | 0 | 0 | 0 | 0 | 0 | 0 | 0 |
| 35       | 36      | 1       | 0 | 0 | 0 | 0 | 0 | 0 | 0 | 0 | 0 | 0 | 0 | 0 | 0 |
| 35       | 37      | 1       | 0 | 0 | 0 | 0 | 0 | 0 | 0 | 0 | 0 | 0 | 0 | 0 | 0 |
| 35       | 38      | 1       | 0 | 0 | 0 | 0 | 0 | 0 | 0 | 0 | 0 | 0 | 0 | 0 | 0 |
| 38       | 39      | 1       | 0 | 0 | 0 | 0 | 0 | 0 | 0 | 0 | 0 | 0 | 0 | 0 | 0 |
| 38       | 46      | 2       | 0 | 0 | 0 | 0 | 0 | 0 | 0 | 0 | 0 | 0 | 0 | 0 | 0 |
| 39       | 40      | 1       | 0 | 0 | 0 | 0 | 0 | 0 | 0 | 0 | 0 | 0 | 0 | 0 | 0 |
| 40       | 41      | 1       | 0 | 0 | 0 | 0 | 0 | 0 | 0 | 0 | 0 | 0 | 0 | 0 | 0 |
| 40       | 42      | 1       | 0 | 0 | 0 | 0 | 0 | 0 | 0 | 0 | 0 | 0 | 0 | 0 | 0 |
| 40       | 43      | 1       | 0 | 0 | 0 | 0 | 0 | 0 | 0 | 0 | 0 | 0 | 0 | 0 | 0 |
| 43       | 44      | 1       | 0 | 0 | 0 | 0 | 0 | 0 | 0 | 0 | 0 | 0 | 0 | 0 | 0 |
| 43       | 45      | 1       | 0 | 0 | 0 | 0 | 0 | 0 | 0 | 0 | 0 | 0 | 0 | 0 | 0 |
| 43       | 47      | 1       | 0 | 0 | 0 | 0 | 0 | 0 | 0 | 0 | 0 | 0 | 0 | 0 | 0 |
| 47       | 48      | 1       | 0 | 0 | 0 | 0 | 0 | 0 | 0 | 0 | 0 | 0 | 0 | 0 | 0 |
| 48       | 49      | 1       | 0 | 0 | 0 | 0 | 0 | 0 | 0 | 0 | 0 | 0 | 0 | 0 | 0 |
| 48       | 56      | 2       | 0 | 0 | 0 | 0 | 0 | 0 | 0 | 0 | 0 | 0 | 0 | 0 | 0 |
| 49       | 50      | 1       | 0 | 0 | 0 | 0 | 0 | 0 | 0 | 0 | 0 | 0 | 0 | 0 | 0 |
| 49       | 51      | 2       | 0 | 0 | 0 | 0 | 0 | 0 | 0 | 0 | 0 | 0 | 0 | 0 | 0 |
| 51       | 52      | 1       | 0 | 0 | 0 | 0 | 0 | 0 | 0 | 0 | 0 | 0 | 0 | 0 | 0 |
| 51       | 53      | 1       | 0 | 0 | 0 | 0 | 0 | 0 | 0 | 0 | 0 | 0 | 0 | 0 | 0 |
| 53       | 54      | 2       | 0 | 0 | 0 | 0 | 0 | 0 | 0 | 0 | 0 | 0 | 0 | 0 | 0 |
| 53       | 58      | 1       | 0 | 0 | 0 | 0 | 0 | 0 | 0 | 0 | 0 | 0 | 0 | 0 | 0 |
| 54       | 55      | 1       | 0 | 0 | 0 | 0 | 0 | 0 | 0 | 0 | 0 | 0 | 0 | 0 | 0 |
| 54       | 56      | 1       | 0 | 0 | 0 | 0 | 0 | 0 | 0 | 0 | 0 | 0 | 0 | 0 | 0 |
| 56       | 57      | 1       | 0 | 0 | 0 | 0 | 0 | 0 | 0 | 0 | 0 | 0 | 0 | 0 | 0 |
| 58       | 59      | 1       | 0 | 0 | 0 | 0 | 0 | 0 | 0 | 0 | 0 | 0 | 0 | 0 | 0 |
| 58       | 60      | 1       | 0 | 0 | 0 | 0 | 0 | 0 | 0 | 0 | 0 | 0 | 0 | 0 | 0 |
| 58       | 64      | 1       | 0 | 0 | 0 | 0 | 0 | 0 | 0 | 0 | 0 | 0 | 0 | 0 | 0 |
| 59       | 68      | 1       | 0 | 0 | 0 | 0 | 0 | 0 | 0 | 0 | 0 | 0 | 0 | 0 | 0 |
| 59       | 75      | 2       | 0 | 0 | 0 | 0 | 0 | 0 | 0 | 0 | 0 | 0 | 0 | 0 | 0 |
| 60       | 61      | 1       | 0 | 0 | 0 | 0 | 0 | 0 | 0 | 0 | 0 | 0 | 0 | 0 | 0 |
| 60       | 62      | 1       | 0 | 0 | 0 | 0 | 0 | 0 | 0 | 0 | 0 | 0 | 0 | 0 | 0 |

|     |     |   |   |   |   |   |
|-----|-----|---|---|---|---|---|
| 60  | 63  | 1 | 0 | 0 | 0 | 0 |
| 64  | 65  | 1 | 0 | 0 | 0 | 0 |
| 64  | 66  | 1 | 0 | 0 | 0 | 0 |
| 64  | 67  | 1 | 0 | 0 | 0 | 0 |
| 68  | 69  | 1 | 0 | 0 | 0 | 0 |
| 68  | 70  | 2 | 0 | 0 | 0 | 0 |
| 70  | 71  | 1 | 0 | 0 | 0 | 0 |
| 70  | 72  | 1 | 0 | 0 | 0 | 0 |
| 72  | 73  | 2 | 0 | 0 | 0 | 0 |
| 72  | 77  | 1 | 0 | 0 | 0 | 0 |
| 73  | 74  | 1 | 0 | 0 | 0 | 0 |
| 73  | 75  | 1 | 0 | 0 | 0 | 0 |
| 75  | 76  | 1 | 0 | 0 | 0 | 0 |
| 78  | 79  | 1 | 0 | 0 | 0 | 0 |
| 78  | 84  | 1 | 0 | 0 | 0 | 0 |
| 78  | 86  | 1 | 0 | 0 | 0 | 0 |
| 79  | 80  | 1 | 0 | 0 | 0 | 0 |
| 79  | 81  | 2 | 0 | 0 | 0 | 0 |
| 81  | 82  | 1 | 0 | 0 | 0 | 0 |
| 81  | 83  | 1 | 0 | 0 | 0 | 0 |
| 83  | 84  | 2 | 0 | 0 | 0 | 0 |
| 84  | 85  | 1 | 0 | 0 | 0 | 0 |
| 86  | 87  | 1 | 0 | 0 | 0 | 0 |
| 86  | 88  | 1 | 0 | 0 | 0 | 0 |
| 86  | 89  | 1 | 0 | 0 | 0 | 0 |
| 89  | 90  | 1 | 0 | 0 | 0 | 0 |
| 89  | 91  | 1 | 0 | 0 | 0 | 0 |
| 89  | 92  | 1 | 0 | 0 | 0 | 0 |
| 92  | 108 | 1 | 0 | 0 | 0 | 0 |
| 93  | 94  | 1 | 0 | 0 | 0 | 0 |
| 93  | 95  | 1 | 0 | 0 | 0 | 0 |
| 93  | 96  | 1 | 0 | 0 | 0 | 0 |
| 93  | 105 | 1 | 0 | 0 | 0 | 0 |
| 96  | 97  | 1 | 0 | 0 | 0 | 0 |
| 97  | 98  | 1 | 0 | 0 | 0 | 0 |
| 97  | 104 | 2 | 0 | 0 | 0 | 0 |
| 98  | 99  | 1 | 0 | 0 | 0 | 0 |
| 98  | 100 | 1 | 0 | 0 | 0 | 0 |
| 98  | 101 | 1 | 0 | 0 | 0 | 0 |
| 101 | 102 | 1 | 0 | 0 | 0 | 0 |
| 101 | 103 | 1 | 0 | 0 | 0 | 0 |
| 101 | 168 | 1 | 0 | 0 | 0 | 0 |
| 105 | 106 | 1 | 0 | 0 | 0 | 0 |
| 105 | 107 | 1 | 0 | 0 | 0 | 0 |
| 105 | 153 | 1 | 0 | 0 | 0 | 0 |
| 108 | 109 | 1 | 0 | 0 | 0 | 0 |
| 108 | 110 | 1 | 0 | 0 | 0 | 0 |
| 108 | 111 | 1 | 0 | 0 | 0 | 0 |
| 111 | 112 | 1 | 0 | 0 | 0 | 0 |
| 111 | 113 | 1 | 0 | 0 | 0 | 0 |
| 111 | 114 | 1 | 0 | 0 | 0 | 0 |
| 114 | 115 | 1 | 0 | 0 | 0 | 0 |
| 114 | 122 | 2 | 0 | 0 | 0 | 0 |
| 115 | 116 | 1 | 0 | 0 | 0 | 0 |
| 116 | 117 | 1 | 0 | 0 | 0 | 0 |
| 116 | 118 | 1 | 0 | 0 | 0 | 0 |
| 116 | 119 | 1 | 0 | 0 | 0 | 0 |
| 119 | 120 | 1 | 0 | 0 | 0 | 0 |
| 119 | 121 | 1 | 0 | 0 | 0 | 0 |
| 119 | 123 | 1 | 0 | 0 | 0 | 0 |
| 123 | 124 | 1 | 0 | 0 | 0 | 0 |
| 124 | 125 | 1 | 0 | 0 | 0 | 0 |
| 124 | 132 | 2 | 0 | 0 | 0 | 0 |
| 125 | 126 | 1 | 0 | 0 | 0 | 0 |
| 125 | 127 | 2 | 0 | 0 | 0 | 0 |
| 127 | 128 | 1 | 0 | 0 | 0 | 0 |
| 127 | 129 | 1 | 0 | 0 | 0 | 0 |
| 129 | 130 | 2 | 0 | 0 | 0 | 0 |
| 129 | 134 | 1 | 0 | 0 | 0 | 0 |
| 130 | 131 | 1 | 0 | 0 | 0 | 0 |
| 130 | 132 | 1 | 0 | 0 | 0 | 0 |
| 132 | 133 | 1 | 0 | 0 | 0 | 0 |
| 134 | 135 | 1 | 0 | 0 | 0 | 0 |
| 134 | 136 | 1 | 0 | 0 | 0 | 0 |
| 134 | 140 | 1 | 0 | 0 | 0 | 0 |
| 135 | 144 | 1 | 0 | 0 | 0 | 0 |
| 135 | 151 | 2 | 0 | 0 | 0 | 0 |
| 136 | 137 | 1 | 0 | 0 | 0 | 0 |
| 136 | 138 | 1 | 0 | 0 | 0 | 0 |
| 136 | 139 | 1 | 0 | 0 | 0 | 0 |
| 140 | 141 | 1 | 0 | 0 | 0 | 0 |

|        |   |   |   |   |   |
|--------|---|---|---|---|---|
| 140142 | 1 | 0 | 0 | 0 | 0 |
| 140143 | 1 | 0 | 0 | 0 | 0 |
| 144145 | 1 | 0 | 0 | 0 | 0 |
| 144146 | 2 | 0 | 0 | 0 | 0 |
| 146147 | 1 | 0 | 0 | 0 | 0 |
| 146148 | 1 | 0 | 0 | 0 | 0 |
| 148149 | 2 | 0 | 0 | 0 | 0 |
| 148153 | 1 | 0 | 0 | 0 | 0 |
| 149150 | 1 | 0 | 0 | 0 | 0 |
| 149151 | 1 | 0 | 0 | 0 | 0 |
| 151152 | 1 | 0 | 0 | 0 | 0 |
| 154155 | 1 | 0 | 0 | 0 | 0 |
| 154160 | 1 | 0 | 0 | 0 | 0 |
| 154162 | 1 | 0 | 0 | 0 | 0 |
| 155156 | 1 | 0 | 0 | 0 | 0 |
| 155157 | 2 | 0 | 0 | 0 | 0 |
| 157158 | 1 | 0 | 0 | 0 | 0 |
| 157159 | 1 | 0 | 0 | 0 | 0 |
| 159160 | 2 | 0 | 0 | 0 | 0 |
| 160161 | 1 | 0 | 0 | 0 | 0 |
| 162163 | 1 | 0 | 0 | 0 | 0 |
| 162164 | 1 | 0 | 0 | 0 | 0 |
| 162165 | 1 | 0 | 0 | 0 | 0 |
| 165166 | 1 | 0 | 0 | 0 | 0 |
| 165167 | 1 | 0 | 0 | 0 | 0 |
| 165168 | 1 | 0 | 0 | 0 | 0 |
| 168184 | 1 | 0 | 0 | 0 | 0 |
| 169170 | 1 | 0 | 0 | 0 | 0 |
| 169171 | 1 | 0 | 0 | 0 | 0 |
| 169172 | 1 | 0 | 0 | 0 | 0 |
| 169181 | 1 | 0 | 0 | 0 | 0 |
| 172173 | 1 | 0 | 0 | 0 | 0 |
| 173174 | 1 | 0 | 0 | 0 | 0 |
| 173180 | 2 | 0 | 0 | 0 | 0 |
| 174175 | 1 | 0 | 0 | 0 | 0 |
| 174176 | 1 | 0 | 0 | 0 | 0 |
| 174177 | 1 | 0 | 0 | 0 | 0 |
| 177178 | 1 | 0 | 0 | 0 | 0 |
| 177179 | 1 | 0 | 0 | 0 | 0 |
| 177244 | 1 | 0 | 0 | 0 | 0 |
| 181182 | 1 | 0 | 0 | 0 | 0 |
| 181183 | 1 | 0 | 0 | 0 | 0 |
| 181229 | 1 | 0 | 0 | 0 | 0 |
| 184185 | 1 | 0 | 0 | 0 | 0 |
| 184186 | 1 | 0 | 0 | 0 | 0 |
| 184187 | 1 | 0 | 0 | 0 | 0 |
| 187188 | 1 | 0 | 0 | 0 | 0 |
| 187189 | 1 | 0 | 0 | 0 | 0 |
| 187190 | 1 | 0 | 0 | 0 | 0 |
| 190191 | 1 | 0 | 0 | 0 | 0 |
| 190198 | 2 | 0 | 0 | 0 | 0 |
| 191192 | 1 | 0 | 0 | 0 | 0 |
| 192193 | 1 | 0 | 0 | 0 | 0 |
| 192194 | 1 | 0 | 0 | 0 | 0 |
| 192195 | 1 | 0 | 0 | 0 | 0 |
| 195196 | 1 | 0 | 0 | 0 | 0 |
| 195197 | 1 | 0 | 0 | 0 | 0 |
| 195199 | 1 | 0 | 0 | 0 | 0 |
| 199200 | 1 | 0 | 0 | 0 | 0 |
| 200201 | 1 | 0 | 0 | 0 | 0 |
| 200208 | 2 | 0 | 0 | 0 | 0 |
| 201202 | 1 | 0 | 0 | 0 | 0 |
| 201203 | 2 | 0 | 0 | 0 | 0 |
| 203204 | 1 | 0 | 0 | 0 | 0 |
| 203205 | 1 | 0 | 0 | 0 | 0 |
| 205206 | 2 | 0 | 0 | 0 | 0 |
| 205210 | 1 | 0 | 0 | 0 | 0 |
| 206207 | 1 | 0 | 0 | 0 | 0 |
| 206208 | 1 | 0 | 0 | 0 | 0 |
| 208209 | 1 | 0 | 0 | 0 | 0 |
| 210211 | 1 | 0 | 0 | 0 | 0 |
| 210212 | 1 | 0 | 0 | 0 | 0 |
| 210216 | 1 | 0 | 0 | 0 | 0 |
| 211220 | 1 | 0 | 0 | 0 | 0 |
| 211227 | 2 | 0 | 0 | 0 | 0 |
| 212213 | 1 | 0 | 0 | 0 | 0 |
| 212214 | 1 | 0 | 0 | 0 | 0 |
| 212215 | 1 | 0 | 0 | 0 | 0 |
| 216217 | 1 | 0 | 0 | 0 | 0 |
| 216218 | 1 | 0 | 0 | 0 | 0 |
| 216219 | 1 | 0 | 0 | 0 | 0 |



|        |   |   |   |   |   |
|--------|---|---|---|---|---|
| 220221 | 1 | 0 | 0 | 0 | 0 |
| 220222 | 2 | 0 | 0 | 0 | 0 |
| 222223 | 1 | 0 | 0 | 0 | 0 |
| 222224 | 1 | 0 | 0 | 0 | 0 |
| 224225 | 2 | 0 | 0 | 0 | 0 |
| 224229 | 1 | 0 | 0 | 0 | 0 |
| 225226 | 1 | 0 | 0 | 0 | 0 |
| 225227 | 1 | 0 | 0 | 0 | 0 |
| 227228 | 1 | 0 | 0 | 0 | 0 |
| 230231 | 1 | 0 | 0 | 0 | 0 |
| 230236 | 1 | 0 | 0 | 0 | 0 |
| 230238 | 1 | 0 | 0 | 0 | 0 |
| 231232 | 1 | 0 | 0 | 0 | 0 |
| 231233 | 2 | 0 | 0 | 0 | 0 |
| 233234 | 1 | 0 | 0 | 0 | 0 |
| 233235 | 1 | 0 | 0 | 0 | 0 |
| 235236 | 2 | 0 | 0 | 0 | 0 |
| 236237 | 1 | 0 | 0 | 0 | 0 |
| 238239 | 1 | 0 | 0 | 0 | 0 |
| 238240 | 1 | 0 | 0 | 0 | 0 |
| 238241 | 1 | 0 | 0 | 0 | 0 |
| 241242 | 1 | 0 | 0 | 0 | 0 |
| 241243 | 1 | 0 | 0 | 0 | 0 |
| 241244 | 1 | 0 | 0 | 0 | 0 |
| 244260 | 1 | 0 | 0 | 0 | 0 |
| 245246 | 1 | 0 | 0 | 0 | 0 |
| 245247 | 1 | 0 | 0 | 0 | 0 |
| 245248 | 1 | 0 | 0 | 0 | 0 |
| 245257 | 1 | 0 | 0 | 0 | 0 |
| 248249 | 1 | 0 | 0 | 0 | 0 |
| 249250 | 1 | 0 | 0 | 0 | 0 |
| 249256 | 2 | 0 | 0 | 0 | 0 |
| 250251 | 1 | 0 | 0 | 0 | 0 |
| 250252 | 1 | 0 | 0 | 0 | 0 |
| 250253 | 1 | 0 | 0 | 0 | 0 |
| 253254 | 1 | 0 | 0 | 0 | 0 |
| 253255 | 1 | 0 | 0 | 0 | 0 |
| 253320 | 1 | 0 | 0 | 0 | 0 |
| 257258 | 1 | 0 | 0 | 0 | 0 |
| 257259 | 1 | 0 | 0 | 0 | 0 |
| 257305 | 1 | 0 | 0 | 0 | 0 |
| 260261 | 1 | 0 | 0 | 0 | 0 |
| 260262 | 1 | 0 | 0 | 0 | 0 |
| 260263 | 1 | 0 | 0 | 0 | 0 |
| 263264 | 1 | 0 | 0 | 0 | 0 |
| 263265 | 1 | 0 | 0 | 0 | 0 |
| 263266 | 1 | 0 | 0 | 0 | 0 |
| 266267 | 1 | 0 | 0 | 0 | 0 |
| 266274 | 2 | 0 | 0 | 0 | 0 |
| 267268 | 1 | 0 | 0 | 0 | 0 |
| 268269 | 1 | 0 | 0 | 0 | 0 |
| 268270 | 1 | 0 | 0 | 0 | 0 |
| 268271 | 1 | 0 | 0 | 0 | 0 |
| 271272 | 1 | 0 | 0 | 0 | 0 |
| 271273 | 1 | 0 | 0 | 0 | 0 |
| 271275 | 1 | 0 | 0 | 0 | 0 |
| 275276 | 1 | 0 | 0 | 0 | 0 |
| 276277 | 1 | 0 | 0 | 0 | 0 |
| 276284 | 2 | 0 | 0 | 0 | 0 |
| 277278 | 1 | 0 | 0 | 0 | 0 |
| 277279 | 2 | 0 | 0 | 0 | 0 |
| 279280 | 1 | 0 | 0 | 0 | 0 |
| 279281 | 1 | 0 | 0 | 0 | 0 |
| 281282 | 2 | 0 | 0 | 0 | 0 |
| 281286 | 1 | 0 | 0 | 0 | 0 |
| 282283 | 1 | 0 | 0 | 0 | 0 |
| 282284 | 1 | 0 | 0 | 0 | 0 |
| 284285 | 1 | 0 | 0 | 0 | 0 |
| 286287 | 1 | 0 | 0 | 0 | 0 |
| 286288 | 1 | 0 | 0 | 0 | 0 |
| 286292 | 1 | 0 | 0 | 0 | 0 |
| 287296 | 1 | 0 | 0 | 0 | 0 |
| 287303 | 2 | 0 | 0 | 0 | 0 |
| 288289 | 1 | 0 | 0 | 0 | 0 |
| 288290 | 1 | 0 | 0 | 0 | 0 |
| 288291 | 1 | 0 | 0 | 0 | 0 |
| 292293 | 1 | 0 | 0 | 0 | 0 |
| 292294 | 1 | 0 | 0 | 0 | 0 |
| 292295 | 1 | 0 | 0 | 0 | 0 |
| 296297 | 1 | 0 | 0 | 0 | 0 |
| 296298 | 2 | 0 | 0 | 0 | 0 |

|        |   |   |   |   |   |
|--------|---|---|---|---|---|
| 298299 | 1 | 0 | 0 | 0 | 0 |
| 298300 | 1 | 0 | 0 | 0 | 0 |
| 300301 | 2 | 0 | 0 | 0 | 0 |
| 300305 | 1 | 0 | 0 | 0 | 0 |
| 301302 | 1 | 0 | 0 | 0 | 0 |
| 301303 | 1 | 0 | 0 | 0 | 0 |
| 303304 | 1 | 0 | 0 | 0 | 0 |
| 306307 | 1 | 0 | 0 | 0 | 0 |
| 306312 | 1 | 0 | 0 | 0 | 0 |
| 306314 | 1 | 0 | 0 | 0 | 0 |
| 307308 | 1 | 0 | 0 | 0 | 0 |
| 307309 | 2 | 0 | 0 | 0 | 0 |
| 309310 | 1 | 0 | 0 | 0 | 0 |
| 309311 | 1 | 0 | 0 | 0 | 0 |
| 311312 | 2 | 0 | 0 | 0 | 0 |
| 312313 | 1 | 0 | 0 | 0 | 0 |
| 314315 | 1 | 0 | 0 | 0 | 0 |
| 314316 | 1 | 0 | 0 | 0 | 0 |
| 314317 | 1 | 0 | 0 | 0 | 0 |
| 317318 | 1 | 0 | 0 | 0 | 0 |
| 317319 | 1 | 0 | 0 | 0 | 0 |
| 317320 | 1 | 0 | 0 | 0 | 0 |
| 320337 | 1 | 0 | 0 | 0 | 0 |
| 321322 | 1 | 0 | 0 | 0 | 0 |
| 321323 | 1 | 0 | 0 | 0 | 0 |
| 321324 | 1 | 0 | 0 | 0 | 0 |
| 321334 | 1 | 0 | 0 | 0 | 0 |
| 324325 | 1 | 0 | 0 | 0 | 0 |
| 325326 | 1 | 0 | 0 | 0 | 0 |
| 325333 | 2 | 0 | 0 | 0 | 0 |
| 326327 | 1 | 0 | 0 | 0 | 0 |
| 326328 | 1 | 0 | 0 | 0 | 0 |
| 326329 | 1 | 0 | 0 | 0 | 0 |
| 329330 | 1 | 0 | 0 | 0 | 0 |
| 329331 | 1 | 0 | 0 | 0 | 0 |
| 329332 | 1 | 0 | 0 | 0 | 0 |
| 334335 | 1 | 0 | 0 | 0 | 0 |
| 334336 | 1 | 0 | 0 | 0 | 0 |
| 334382 | 1 | 0 | 0 | 0 | 0 |
| 337338 | 1 | 0 | 0 | 0 | 0 |
| 337339 | 1 | 0 | 0 | 0 | 0 |
| 337340 | 1 | 0 | 0 | 0 | 0 |
| 340341 | 1 | 0 | 0 | 0 | 0 |
| 340342 | 1 | 0 | 0 | 0 | 0 |
| 340343 | 1 | 0 | 0 | 0 | 0 |
| 343344 | 1 | 0 | 0 | 0 | 0 |
| 343351 | 2 | 0 | 0 | 0 | 0 |
| 344345 | 1 | 0 | 0 | 0 | 0 |
| 345346 | 1 | 0 | 0 | 0 | 0 |
| 345347 | 1 | 0 | 0 | 0 | 0 |
| 345348 | 1 | 0 | 0 | 0 | 0 |
| 348349 | 1 | 0 | 0 | 0 | 0 |
| 348350 | 1 | 0 | 0 | 0 | 0 |
| 348352 | 1 | 0 | 0 | 0 | 0 |
| 352353 | 1 | 0 | 0 | 0 | 0 |
| 353354 | 1 | 0 | 0 | 0 | 0 |
| 353361 | 2 | 0 | 0 | 0 | 0 |
| 354355 | 1 | 0 | 0 | 0 | 0 |
| 354356 | 2 | 0 | 0 | 0 | 0 |
| 356357 | 1 | 0 | 0 | 0 | 0 |
| 356358 | 1 | 0 | 0 | 0 | 0 |
| 358359 | 2 | 0 | 0 | 0 | 0 |
| 358363 | 1 | 0 | 0 | 0 | 0 |
| 359360 | 1 | 0 | 0 | 0 | 0 |
| 359361 | 1 | 0 | 0 | 0 | 0 |
| 361362 | 1 | 0 | 0 | 0 | 0 |
| 363364 | 1 | 0 | 0 | 0 | 0 |
| 363365 | 1 | 0 | 0 | 0 | 0 |
| 363369 | 1 | 0 | 0 | 0 | 0 |
| 364373 | 1 | 0 | 0 | 0 | 0 |
| 364380 | 2 | 0 | 0 | 0 | 0 |
| 365366 | 1 | 0 | 0 | 0 | 0 |
| 365367 | 1 | 0 | 0 | 0 | 0 |
| 365368 | 1 | 0 | 0 | 0 | 0 |
| 369370 | 1 | 0 | 0 | 0 | 0 |
| 369371 | 1 | 0 | 0 | 0 | 0 |
| 369372 | 1 | 0 | 0 | 0 | 0 |
| 373374 | 1 | 0 | 0 | 0 | 0 |
| 373375 | 2 | 0 | 0 | 0 | 0 |
| 375376 | 1 | 0 | 0 | 0 | 0 |
| 375377 | 1 | 0 | 0 | 0 | 0 |







|         |         |          |   |   |   |   |   |   |   |   |   |   |   |   |   |
|---------|---------|----------|---|---|---|---|---|---|---|---|---|---|---|---|---|
| 60.4690 | -5.8430 | -25.1980 | C | 0 | 0 | 0 | 0 | 0 | 0 | 0 | 0 | 0 | 0 | 0 | 0 |
| 59.6730 | -5.0900 | -25.2330 | H | 0 | 0 | 0 | 0 | 0 | 0 | 0 | 0 | 0 | 0 | 0 | 0 |
| 61.4410 | -5.3570 | -25.3370 | H | 0 | 0 | 0 | 0 | 0 | 0 | 0 | 0 | 0 | 0 | 0 | 0 |
| 60.2460 | -6.8910 | -26.2830 | C | 0 | 0 | 0 | 0 | 0 | 0 | 0 | 0 | 0 | 0 | 0 | 0 |
| 61.0210 | -7.6640 | -26.2070 | H | 0 | 0 | 0 | 0 | 0 | 0 | 0 | 0 | 0 | 0 | 0 | 0 |
| 59.2930 | -7.4040 | -26.1020 | H | 0 | 0 | 0 | 0 | 0 | 0 | 0 | 0 | 0 | 0 | 0 | 0 |
| 60.7900 | -4.4620 | -22.9190 | O | 0 | 0 | 0 | 0 | 0 | 0 | 0 | 0 | 0 | 0 | 0 | 0 |
| 60.2540 | -6.2670 | -27.6780 | C | 0 | 0 | 0 | 0 | 0 | 0 | 0 | 0 | 0 | 0 | 0 | 0 |
| 59.4730 | -5.4990 | -27.7410 | H | 0 | 0 | 0 | 0 | 0 | 0 | 0 | 0 | 0 | 0 | 0 | 0 |
| 61.2150 | -5.7650 | -27.8490 | H | 0 | 0 | 0 | 0 | 0 | 0 | 0 | 0 | 0 | 0 | 0 | 0 |
| 60.0260 | -7.3190 | -28.7640 | C | 0 | 0 | 0 | 0 | 0 | 0 | 0 | 0 | 0 | 0 | 0 | 0 |
| 59.0660 | -7.8220 | -28.5920 | H | 0 | 0 | 0 | 0 | 0 | 0 | 0 | 0 | 0 | 0 | 0 | 0 |
| 60.8070 | -8.0860 | -28.7030 | H | 0 | 0 | 0 | 0 | 0 | 0 | 0 | 0 | 0 | 0 | 0 | 0 |
| 1       | 2       | 1        | 0 | 0 | 0 | 0 |   |   |   |   |   |   |   |   |   |
| 1       | 3       | 1        | 0 | 0 | 0 | 0 |   |   |   |   |   |   |   |   |   |
| 3       | 4       | 1        | 0 | 0 | 0 | 0 |   |   |   |   |   |   |   |   |   |
| 3       | 5       | 1        | 0 | 0 | 0 | 0 |   |   |   |   |   |   |   |   |   |
| 3       | 6       | 1        | 0 | 0 | 0 | 0 |   |   |   |   |   |   |   |   |   |
| 6       | 7       | 1        | 0 | 0 | 0 | 0 |   |   |   |   |   |   |   |   |   |
| 6       | 8       | 1        | 0 | 0 | 0 | 0 |   |   |   |   |   |   |   |   |   |
| 6       | 9       | 1        | 0 | 0 | 0 | 0 |   |   |   |   |   |   |   |   |   |
| 9       | 10      | 1        | 0 | 0 | 0 | 0 |   |   |   |   |   |   |   |   |   |
| 9       | 11      | 1        | 0 | 0 | 0 | 0 |   |   |   |   |   |   |   |   |   |
| 9       | 12      | 1        | 0 | 0 | 0 | 0 |   |   |   |   |   |   |   |   |   |
| 12      | 13      | 1        | 0 | 0 | 0 | 0 |   |   |   |   |   |   |   |   |   |
| 12      | 29      | 1        | 0 | 0 | 0 | 0 |   |   |   |   |   |   |   |   |   |
| 14      | 15      | 1        | 0 | 0 | 0 | 0 |   |   |   |   |   |   |   |   |   |
| 14      | 16      | 1        | 0 | 0 | 0 | 0 |   |   |   |   |   |   |   |   |   |
| 14      | 17      | 1        | 0 | 0 | 0 | 0 |   |   |   |   |   |   |   |   |   |
| 14      | 26      | 1        | 0 | 0 | 0 | 0 |   |   |   |   |   |   |   |   |   |
| 17      | 18      | 1        | 0 | 0 | 0 | 0 |   |   |   |   |   |   |   |   |   |
| 18      | 19      | 1        | 0 | 0 | 0 | 0 |   |   |   |   |   |   |   |   |   |
| 18      | 25      | 2        | 0 | 0 | 0 | 0 |   |   |   |   |   |   |   |   |   |
| 19      | 20      | 1        | 0 | 0 | 0 | 0 |   |   |   |   |   |   |   |   |   |
| 19      | 21      | 1        | 0 | 0 | 0 | 0 |   |   |   |   |   |   |   |   |   |
| 19      | 22      | 1        | 0 | 0 | 0 | 0 |   |   |   |   |   |   |   |   |   |
| 22      | 23      | 1        | 0 | 0 | 0 | 0 |   |   |   |   |   |   |   |   |   |
| 22      | 24      | 1        | 0 | 0 | 0 | 0 |   |   |   |   |   |   |   |   |   |
| 22      | 61      | 1        | 0 | 0 | 0 | 0 |   |   |   |   |   |   |   |   |   |
| 26      | 27      | 1        | 0 | 0 | 0 | 0 |   |   |   |   |   |   |   |   |   |
| 26      | 28      | 1        | 0 | 0 | 0 | 0 |   |   |   |   |   |   |   |   |   |
| 26      | 47      | 1        | 0 | 0 | 0 | 0 |   |   |   |   |   |   |   |   |   |
| 29      | 30      | 1        | 0 | 0 | 0 | 0 |   |   |   |   |   |   |   |   |   |
| 29      | 31      | 1        | 0 | 0 | 0 | 0 |   |   |   |   |   |   |   |   |   |
| 29      | 32      | 1        | 0 | 0 | 0 | 0 |   |   |   |   |   |   |   |   |   |
| 32      | 33      | 1        | 0 | 0 | 0 | 0 |   |   |   |   |   |   |   |   |   |
| 32      | 34      | 1        | 0 | 0 | 0 | 0 |   |   |   |   |   |   |   |   |   |
| 32      | 35      | 1        | 0 | 0 | 0 | 0 |   |   |   |   |   |   |   |   |   |
| 35      | 36      | 1        | 0 | 0 | 0 | 0 |   |   |   |   |   |   |   |   |   |
| 35      | 43      | 2        | 0 | 0 | 0 | 0 |   |   |   |   |   |   |   |   |   |
| 36      | 37      | 1        | 0 | 0 | 0 | 0 |   |   |   |   |   |   |   |   |   |
| 37      | 38      | 1        | 0 | 0 | 0 | 0 |   |   |   |   |   |   |   |   |   |
| 37      | 39      | 1        | 0 | 0 | 0 | 0 |   |   |   |   |   |   |   |   |   |
| 37      | 40      | 1        | 0 | 0 | 0 | 0 |   |   |   |   |   |   |   |   |   |
| 40      | 41      | 1        | 0 | 0 | 0 | 0 |   |   |   |   |   |   |   |   |   |
| 40      | 42      | 1        | 0 | 0 | 0 | 0 |   |   |   |   |   |   |   |   |   |
| 40      | 44      | 1        | 0 | 0 | 0 | 0 |   |   |   |   |   |   |   |   |   |
| 44      | 45      | 1        | 0 | 0 | 0 | 0 |   |   |   |   |   |   |   |   |   |
| 44      | 46      | 1        | 0 | 0 | 0 | 0 |   |   |   |   |   |   |   |   |   |
| 44      | 47      | 1        | 0 | 0 | 0 | 0 |   |   |   |   |   |   |   |   |   |
| 47      | 48      | 1        | 0 | 0 | 0 | 0 |   |   |   |   |   |   |   |   |   |
| 47      | 49      | 1        | 0 | 0 | 0 | 0 |   |   |   |   |   |   |   |   |   |
| 50      | 51      | 1        | 0 | 0 | 0 | 0 |   |   |   |   |   |   |   |   |   |
| 50      | 52      | 1        | 0 | 0 | 0 | 0 |   |   |   |   |   |   |   |   |   |
| 52      | 53      | 1        | 0 | 0 | 0 | 0 |   |   |   |   |   |   |   |   |   |
| 52      | 54      | 1        | 0 | 0 | 0 | 0 |   |   |   |   |   |   |   |   |   |
| 52      | 55      | 1        | 0 | 0 | 0 | 0 |   |   |   |   |   |   |   |   |   |
| 55      | 56      | 1        | 0 | 0 | 0 | 0 |   |   |   |   |   |   |   |   |   |
| 55      | 57      | 1        | 0 | 0 | 0 | 0 |   |   |   |   |   |   |   |   |   |
| 55      | 58      | 1        | 0 | 0 | 0 | 0 |   |   |   |   |   |   |   |   |   |
| 58      | 59      | 1        | 0 | 0 | 0 | 0 |   |   |   |   |   |   |   |   |   |
| 58      | 60      | 1        | 0 | 0 | 0 | 0 |   |   |   |   |   |   |   |   |   |
| 58      | 61      | 1        | 0 | 0 | 0 | 0 |   |   |   |   |   |   |   |   |   |
| 61      | 77      | 1        | 0 | 0 | 0 | 0 |   |   |   |   |   |   |   |   |   |
| 62      | 63      | 1        | 0 | 0 | 0 | 0 |   |   |   |   |   |   |   |   |   |
| 62      | 64      | 1        | 0 | 0 | 0 | 0 |   |   |   |   |   |   |   |   |   |
| 62      | 65      | 1        | 0 | 0 | 0 | 0 |   |   |   |   |   |   |   |   |   |
| 62      | 74      | 1        | 0 | 0 | 0 | 0 |   |   |   |   |   |   |   |   |   |
| 65      | 66      | 1        | 0 | 0 | 0 | 0 |   |   |   |   |   |   |   |   |   |
| 66      | 67      | 1        | 0 | 0 | 0 | 0 |   |   |   |   |   |   |   |   |   |
| 66      | 73      | 2        | 0 | 0 | 0 | 0 |   |   |   |   |   |   |   |   |   |

|     |     |   |   |   |   |   |
|-----|-----|---|---|---|---|---|
| 67  | 68  | 1 | 0 | 0 | 0 | 0 |
| 67  | 69  | 1 | 0 | 0 | 0 | 0 |
| 67  | 70  | 1 | 0 | 0 | 0 | 0 |
| 70  | 71  | 1 | 0 | 0 | 0 | 0 |
| 70  | 72  | 1 | 0 | 0 | 0 | 0 |
| 70  | 109 | 1 | 0 | 0 | 0 | 0 |
| 74  | 75  | 1 | 0 | 0 | 0 | 0 |
| 74  | 76  | 1 | 0 | 0 | 0 | 0 |
| 74  | 95  | 1 | 0 | 0 | 0 | 0 |
| 77  | 78  | 1 | 0 | 0 | 0 | 0 |
| 77  | 79  | 1 | 0 | 0 | 0 | 0 |
| 77  | 80  | 1 | 0 | 0 | 0 | 0 |
| 80  | 81  | 1 | 0 | 0 | 0 | 0 |
| 80  | 82  | 1 | 0 | 0 | 0 | 0 |
| 80  | 83  | 1 | 0 | 0 | 0 | 0 |
| 83  | 84  | 1 | 0 | 0 | 0 | 0 |
| 83  | 91  | 2 | 0 | 0 | 0 | 0 |
| 84  | 85  | 1 | 0 | 0 | 0 | 0 |
| 85  | 86  | 1 | 0 | 0 | 0 | 0 |
| 85  | 87  | 1 | 0 | 0 | 0 | 0 |
| 85  | 88  | 1 | 0 | 0 | 0 | 0 |
| 88  | 89  | 1 | 0 | 0 | 0 | 0 |
| 88  | 90  | 1 | 0 | 0 | 0 | 0 |
| 88  | 92  | 1 | 0 | 0 | 0 | 0 |
| 92  | 93  | 1 | 0 | 0 | 0 | 0 |
| 92  | 94  | 1 | 0 | 0 | 0 | 0 |
| 92  | 95  | 1 | 0 | 0 | 0 | 0 |
| 95  | 96  | 1 | 0 | 0 | 0 | 0 |
| 95  | 97  | 1 | 0 | 0 | 0 | 0 |
| 98  | 99  | 1 | 0 | 0 | 0 | 0 |
| 98  | 100 | 1 | 0 | 0 | 0 | 0 |
| 100 | 101 | 1 | 0 | 0 | 0 | 0 |
| 100 | 102 | 1 | 0 | 0 | 0 | 0 |
| 100 | 103 | 1 | 0 | 0 | 0 | 0 |
| 103 | 104 | 1 | 0 | 0 | 0 | 0 |
| 103 | 105 | 1 | 0 | 0 | 0 | 0 |
| 103 | 106 | 1 | 0 | 0 | 0 | 0 |
| 106 | 107 | 1 | 0 | 0 | 0 | 0 |
| 106 | 108 | 1 | 0 | 0 | 0 | 0 |
| 106 | 109 | 1 | 0 | 0 | 0 | 0 |
| 109 | 125 | 1 | 0 | 0 | 0 | 0 |
| 110 | 111 | 1 | 0 | 0 | 0 | 0 |
| 110 | 112 | 1 | 0 | 0 | 0 | 0 |
| 110 | 113 | 1 | 0 | 0 | 0 | 0 |
| 110 | 122 | 1 | 0 | 0 | 0 | 0 |
| 113 | 114 | 1 | 0 | 0 | 0 | 0 |
| 114 | 115 | 1 | 0 | 0 | 0 | 0 |
| 114 | 121 | 2 | 0 | 0 | 0 | 0 |
| 115 | 116 | 1 | 0 | 0 | 0 | 0 |
| 115 | 117 | 1 | 0 | 0 | 0 | 0 |
| 115 | 118 | 1 | 0 | 0 | 0 | 0 |
| 118 | 119 | 1 | 0 | 0 | 0 | 0 |
| 118 | 120 | 1 | 0 | 0 | 0 | 0 |
| 118 | 157 | 1 | 0 | 0 | 0 | 0 |
| 122 | 123 | 1 | 0 | 0 | 0 | 0 |
| 122 | 124 | 1 | 0 | 0 | 0 | 0 |
| 122 | 143 | 1 | 0 | 0 | 0 | 0 |
| 125 | 126 | 1 | 0 | 0 | 0 | 0 |
| 125 | 127 | 1 | 0 | 0 | 0 | 0 |
| 125 | 128 | 1 | 0 | 0 | 0 | 0 |
| 128 | 129 | 1 | 0 | 0 | 0 | 0 |
| 128 | 130 | 1 | 0 | 0 | 0 | 0 |
| 128 | 131 | 1 | 0 | 0 | 0 | 0 |
| 131 | 132 | 1 | 0 | 0 | 0 | 0 |
| 131 | 139 | 2 | 0 | 0 | 0 | 0 |
| 132 | 133 | 1 | 0 | 0 | 0 | 0 |
| 133 | 134 | 1 | 0 | 0 | 0 | 0 |
| 133 | 135 | 1 | 0 | 0 | 0 | 0 |
| 133 | 136 | 1 | 0 | 0 | 0 | 0 |
| 136 | 137 | 1 | 0 | 0 | 0 | 0 |
| 136 | 138 | 1 | 0 | 0 | 0 | 0 |
| 136 | 140 | 1 | 0 | 0 | 0 | 0 |
| 140 | 141 | 1 | 0 | 0 | 0 | 0 |
| 140 | 142 | 1 | 0 | 0 | 0 | 0 |
| 140 | 143 | 1 | 0 | 0 | 0 | 0 |
| 143 | 144 | 1 | 0 | 0 | 0 | 0 |
| 143 | 145 | 1 | 0 | 0 | 0 | 0 |
| 146 | 147 | 1 | 0 | 0 | 0 | 0 |
| 146 | 148 | 1 | 0 | 0 | 0 | 0 |
| 148 | 149 | 1 | 0 | 0 | 0 | 0 |
| 148 | 150 | 1 | 0 | 0 | 0 | 0 |

|        |   |   |   |   |   |
|--------|---|---|---|---|---|
| 148151 | 1 | 0 | 0 | 0 | 0 |
| 151152 | 1 | 0 | 0 | 0 | 0 |
| 151153 | 1 | 0 | 0 | 0 | 0 |
| 151154 | 1 | 0 | 0 | 0 | 0 |
| 154155 | 1 | 0 | 0 | 0 | 0 |
| 154156 | 1 | 0 | 0 | 0 | 0 |
| 154157 | 1 | 0 | 0 | 0 | 0 |
| 157173 | 1 | 0 | 0 | 0 | 0 |
| 158159 | 1 | 0 | 0 | 0 | 0 |
| 158160 | 1 | 0 | 0 | 0 | 0 |
| 158161 | 1 | 0 | 0 | 0 | 0 |
| 158170 | 1 | 0 | 0 | 0 | 0 |
| 161162 | 1 | 0 | 0 | 0 | 0 |
| 162163 | 1 | 0 | 0 | 0 | 0 |
| 162169 | 2 | 0 | 0 | 0 | 0 |
| 163164 | 1 | 0 | 0 | 0 | 0 |
| 163165 | 1 | 0 | 0 | 0 | 0 |
| 163166 | 1 | 0 | 0 | 0 | 0 |
| 166167 | 1 | 0 | 0 | 0 | 0 |
| 166168 | 1 | 0 | 0 | 0 | 0 |
| 166205 | 1 | 0 | 0 | 0 | 0 |
| 170171 | 1 | 0 | 0 | 0 | 0 |
| 170172 | 1 | 0 | 0 | 0 | 0 |
| 170191 | 1 | 0 | 0 | 0 | 0 |
| 173174 | 1 | 0 | 0 | 0 | 0 |
| 173175 | 1 | 0 | 0 | 0 | 0 |
| 173176 | 1 | 0 | 0 | 0 | 0 |
| 176177 | 1 | 0 | 0 | 0 | 0 |
| 176178 | 1 | 0 | 0 | 0 | 0 |
| 176179 | 1 | 0 | 0 | 0 | 0 |
| 179180 | 1 | 0 | 0 | 0 | 0 |
| 179187 | 2 | 0 | 0 | 0 | 0 |
| 180181 | 1 | 0 | 0 | 0 | 0 |
| 181182 | 1 | 0 | 0 | 0 | 0 |
| 181183 | 1 | 0 | 0 | 0 | 0 |
| 181184 | 1 | 0 | 0 | 0 | 0 |
| 184185 | 1 | 0 | 0 | 0 | 0 |
| 184186 | 1 | 0 | 0 | 0 | 0 |
| 184188 | 1 | 0 | 0 | 0 | 0 |
| 188189 | 1 | 0 | 0 | 0 | 0 |
| 188190 | 1 | 0 | 0 | 0 | 0 |
| 188191 | 1 | 0 | 0 | 0 | 0 |
| 191192 | 1 | 0 | 0 | 0 | 0 |
| 191193 | 1 | 0 | 0 | 0 | 0 |
| 194195 | 1 | 0 | 0 | 0 | 0 |
| 194196 | 1 | 0 | 0 | 0 | 0 |
| 196197 | 1 | 0 | 0 | 0 | 0 |
| 196198 | 1 | 0 | 0 | 0 | 0 |
| 196199 | 1 | 0 | 0 | 0 | 0 |
| 199200 | 1 | 0 | 0 | 0 | 0 |
| 199201 | 1 | 0 | 0 | 0 | 0 |
| 199202 | 1 | 0 | 0 | 0 | 0 |
| 202203 | 1 | 0 | 0 | 0 | 0 |
| 202204 | 1 | 0 | 0 | 0 | 0 |
| 202205 | 1 | 0 | 0 | 0 | 0 |
| 205222 | 1 | 0 | 0 | 0 | 0 |
| 206207 | 1 | 0 | 0 | 0 | 0 |
| 206208 | 1 | 0 | 0 | 0 | 0 |
| 206209 | 1 | 0 | 0 | 0 | 0 |
| 206219 | 1 | 0 | 0 | 0 | 0 |
| 209210 | 1 | 0 | 0 | 0 | 0 |
| 210211 | 1 | 0 | 0 | 0 | 0 |
| 210218 | 2 | 0 | 0 | 0 | 0 |
| 211212 | 1 | 0 | 0 | 0 | 0 |
| 211213 | 1 | 0 | 0 | 0 | 0 |
| 211214 | 1 | 0 | 0 | 0 | 0 |
| 214215 | 1 | 0 | 0 | 0 | 0 |
| 214216 | 1 | 0 | 0 | 0 | 0 |
| 214217 | 1 | 0 | 0 | 0 | 0 |
| 219220 | 1 | 0 | 0 | 0 | 0 |
| 219221 | 1 | 0 | 0 | 0 | 0 |
| 219240 | 1 | 0 | 0 | 0 | 0 |
| 222223 | 1 | 0 | 0 | 0 | 0 |
| 222224 | 1 | 0 | 0 | 0 | 0 |
| 222225 | 1 | 0 | 0 | 0 | 0 |
| 225226 | 1 | 0 | 0 | 0 | 0 |
| 225227 | 1 | 0 | 0 | 0 | 0 |
| 225228 | 1 | 0 | 0 | 0 | 0 |
| 228229 | 1 | 0 | 0 | 0 | 0 |
| 228236 | 2 | 0 | 0 | 0 | 0 |
| 229230 | 1 | 0 | 0 | 0 | 0 |



230231 1 0 0 0 0  
230232 1 0 0 0 0  
230233 1 0 0 0 0  
233234 1 0 0 0 0  
233235 1 0 0 0 0  
233237 1 0 0 0 0  
237238 1 0 0 0 0  
237239 1 0 0 0 0  
237240 1 0 0 0 0  
240241 1 0 0 0 0  
240242 1 0 0 0 0

M END  
> <NAME>  
E20\_1

\$\$\$\$  
E24\_1  
MOE2012 3D

247246 0 0 1 0 0 0 0 0999 V2000  
14.1100 29.3810 4.5630 O 0 0 0 0 0 0 0 0 0 0 0 0 0 0 0  
13.8810 30.1420 5.1250 H 0 0 0 0 0 0 0 0 0 0 0 0 0 0 0  
14.7980 28.4420 5.3940 C 0 0 0 0 0 0 0 0 0 0 0 0 0 0 0  
15.6670 28.9310 5.8440 H 0 0 0 0 0 0 0 0 0 0 0 0 0 0 0  
14.1030 28.1270 6.1790 H 0 0 0 0 0 0 0 0 0 0 0 0 0 0 0  
15.2150 27.2610 4.5190 C 0 0 3 0 0 0 0 0 0 0 0 0 0 0 0  
15.8780 27.6090 3.7180 H 0 0 0 0 0 0 0 0 0 0 0 0 0 0 0  
15.8810 26.1490 5.3400 C 0 0 0 0 0 0 0 0 0 0 0 0 0 0 0  
16.7580 26.5420 5.8660 H 0 0 0 0 0 0 0 0 0 0 0 0 0 0 0  
15.1630 25.7740 6.0810 H 0 0 0 0 0 0 0 0 0 0 0 0 0 0 0  
16.2810 25.0540 4.4460 N 0 0 3 0 0 0 0 0 0 0 0 0 0 0 0  
15.4690 24.8290 3.8630 H 0 0 0 0 0 0 0 0 0 0 0 0 0 0 0  
14.0340 26.7400 3.8850 O 0 0 0 0 0 0 0 0 0 0 0 0 0 0 0  
13.5580 27.5380 3.5760 H 0 0 0 0 0 0 0 0 0 0 0 0 0 0 0  
19.6680 13.5230 2.3550 C 0 0 0 0 0 0 0 0 0 0 0 0 0 0 0  
20.4690 13.8450 1.6800 H 0 0 0 0 0 0 0 0 0 0 0 0 0 0 0  
18.7350 13.4090 1.7910 H 0 0 0 0 0 0 0 0 0 0 0 0 0 0 0  
20.0260 12.2660 2.9490 O 0 0 0 0 0 0 0 0 0 0 0 0 0 0 0  
20.1470 11.2340 2.0640 C 0 0 0 0 0 0 0 0 0 0 0 0 0 0 0  
20.5190 9.9790 2.8130 C 0 0 0 0 0 0 0 0 0 0 0 0 0 0 0  
21.5100 10.1380 3.2470 H 0 0 0 0 0 0 0 0 0 0 0 0 0 0 0  
19.7900 9.8430 3.6180 H 0 0 0 0 0 0 0 0 0 0 0 0 0 0 0  
20.5230 8.7650 1.8780 C 0 0 0 0 0 0 0 0 0 0 0 0 0 0 0  
19.5510 8.6840 1.3790 H 0 0 0 0 0 0 0 0 0 0 0 0 0 0 0  
21.2040 8.9570 1.0400 H 0 0 0 0 0 0 0 0 0 0 0 0 0 0 0  
19.9980 11.3240 0.8540 O 0 0 0 0 0 0 0 0 0 0 0 0 0 0 0  
19.4800 14.5430 3.4740 C 0 0 0 0 0 0 0 0 0 0 0 0 0 0 0  
18.7230 14.1720 4.1770 H 0 0 0 0 0 0 0 0 0 0 0 0 0 0 0  
20.4100 14.6260 4.0490 H 0 0 0 0 0 0 0 0 0 0 0 0 0 0 0  
16.7140 23.8760 5.1970 C 0 0 0 0 0 0 0 0 0 0 0 0 0 0 0  
17.5660 24.1320 5.8380 H 0 0 0 0 0 0 0 0 0 0 0 0 0 0 0  
15.9050 23.5180 5.8470 H 0 0 0 0 0 0 0 0 0 0 0 0 0 0 0  
17.1180 22.7720 4.2250 C 0 0 0 0 0 0 0 0 0 0 0 0 0 0 0  
16.2670 22.5070 3.5860 H 0 0 0 0 0 0 0 0 0 0 0 0 0 0 0  
17.9490 23.1080 3.5930 H 0 0 0 0 0 0 0 0 0 0 0 0 0 0 0  
17.5580 21.5300 4.9590 C 0 0 0 0 0 0 0 0 0 0 0 0 0 0 0  
17.8080 20.5390 4.0550 O 0 0 0 0 0 0 0 0 0 0 0 0 0 0 0  
18.2260 19.2950 4.6380 C 0 0 0 0 0 0 0 0 0 0 0 0 0 0 0  
19.1620 19.4480 5.1880 H 0 0 0 0 0 0 0 0 0 0 0 0 0 0 0  
17.4510 18.9370 5.3250 H 0 0 0 0 0 0 0 0 0 0 0 0 0 0 0  
18.4370 18.2860 3.5150 C 0 0 0 0 0 0 0 0 0 0 0 0 0 0 0  
17.5090 18.1880 2.9360 H 0 0 0 0 0 0 0 0 0 0 0 0 0 0 0  
19.1880 18.6720 2.8150 H 0 0 0 0 0 0 0 0 0 0 0 0 0 0 0  
17.6760 21.4220 6.1710 O 0 0 0 0 0 0 0 0 0 0 0 0 0 0 0  
18.8680 16.9230 4.0560 C 0 0 0 0 0 0 0 0 0 0 0 0 0 0 0  
19.8010 17.0320 4.6230 H 0 0 0 0 0 0 0 0 0 0 0 0 0 0 0  
18.1080 16.5490 4.7530 H 0 0 0 0 0 0 0 0 0 0 0 0 0 0 0  
19.0690 15.9100 2.9280 C 0 0 0 0 0 0 0 0 0 0 0 0 0 0 0  
19.8390 16.2760 2.2380 H 0 0 0 0 0 0 0 0 0 0 0 0 0 0 0  
18.1400 15.8110 2.3540 H 0 0 0 0 0 0 0 0 0 0 0 0 0 0 0  
16.8950 5.8210 1.5420 O 0 0 0 0 0 0 0 0 0 0 0 0 0 0 0  
16.8190 5.2450 0.7600 H 0 0 0 0 0 0 0 0 0 0 0 0 0 0 0  
18.2960 5.9560 1.8090 C 0 0 0 0 0 0 0 0 0 0 0 0 0 0 0  
18.7320 4.9600 1.9350 H 0 0 0 0 0 0 0 0 0 0 0 0 0 0 0  
18.7420 6.4470 0.9390 H 0 0 0 0 0 0 0 0 0 0 0 0 0 0 0  
18.4480 6.7930 3.0780 C 0 0 3 0 0 0 0 0 0 0 0 0 0 0 0  
17.9200 6.2860 3.8950 H 0 0 0 0 0 0 0 0 0 0 0 0 0 0 0  
19.9100 7.0110 3.5170 C 0 0 0 0 0 0 0 0 0 0 0 0 0 0 0  
19.9250 7.6980 4.3730 H 0 0 0 0 0 0 0 0 0 0 0 0 0 0 0  
20.2590 6.0390 3.8900 H 0 0 0 0 0 0 0 0 0 0 0 0 0 0 0  
20.8750 7.4660 2.4870 N 0 0 3 0 0 0 0 0 0 0 0 0 0 0 0





|         |        |          |   |   |   |   |   |   |   |   |   |   |   |   |   |   |
|---------|--------|----------|---|---|---|---|---|---|---|---|---|---|---|---|---|---|
| 73.6840 | 3.7370 | -13.2940 | C | 0 | 0 | 0 | 0 | 0 | 0 | 0 | 0 | 0 | 0 | 0 | 0 | 0 |
| 73.7290 | 4.1660 | -12.2850 | H | 0 | 0 | 0 | 0 | 0 | 0 | 0 | 0 | 0 | 0 | 0 | 0 | 0 |
| 74.3640 | 4.3410 | -13.9080 | H | 0 | 0 | 0 | 0 | 0 | 0 | 0 | 0 | 0 | 0 | 0 | 0 | 0 |
| 65.9240 | 9.2530 | -15.9590 | C | 0 | 0 | 0 | 0 | 0 | 0 | 0 | 0 | 0 | 0 | 0 | 0 | 0 |
| 66.6170 | 9.7820 | -16.6270 | H | 0 | 0 | 0 | 0 | 0 | 0 | 0 | 0 | 0 | 0 | 0 | 0 | 0 |
| 65.8740 | 9.8500 | -15.0390 | H | 0 | 0 | 0 | 0 | 0 | 0 | 0 | 0 | 0 | 0 | 0 | 0 | 0 |
| 66.5370 | 7.8830 | -15.6610 | C | 0 | 0 | 0 | 0 | 0 | 0 | 0 | 0 | 0 | 0 | 0 | 0 | 0 |
| 65.9550 | 7.3450 | -14.9070 | H | 0 | 0 | 0 | 0 | 0 | 0 | 0 | 0 | 0 | 0 | 0 | 0 | 0 |
| 66.5810 | 7.2890 | -16.5810 | H | 0 | 0 | 0 | 0 | 0 | 0 | 0 | 0 | 0 | 0 | 0 | 0 | 0 |
| 67.9370 | 8.0250 | -15.1190 | C | 0 | 0 | 0 | 0 | 0 | 0 | 0 | 0 | 0 | 0 | 0 | 0 | 0 |
| 68.5050 | 6.7900 | -15.0090 | O | 0 | 0 | 0 | 0 | 0 | 0 | 0 | 0 | 0 | 0 | 0 | 0 | 0 |
| 69.8390 | 6.7930 | -14.4810 | C | 0 | 0 | 0 | 0 | 0 | 0 | 0 | 0 | 0 | 0 | 0 | 0 | 0 |
| 70.4860 | 7.3950 | -15.1290 | H | 0 | 0 | 0 | 0 | 0 | 0 | 0 | 0 | 0 | 0 | 0 | 0 | 0 |
| 69.8290 | 7.2210 | -13.4720 | H | 0 | 0 | 0 | 0 | 0 | 0 | 0 | 0 | 0 | 0 | 0 | 0 | 0 |
| 70.3390 | 5.3530 | -14.4340 | C | 0 | 0 | 0 | 0 | 0 | 0 | 0 | 0 | 0 | 0 | 0 | 0 | 0 |
| 69.6570 | 4.7520 | -13.8200 | H | 0 | 0 | 0 | 0 | 0 | 0 | 0 | 0 | 0 | 0 | 0 | 0 | 0 |
| 70.2950 | 4.9210 | -15.4420 | H | 0 | 0 | 0 | 0 | 0 | 0 | 0 | 0 | 0 | 0 | 0 | 0 | 0 |
| 68.4730 | 9.0780 | -14.8040 | O | 0 | 0 | 0 | 0 | 0 | 0 | 0 | 0 | 0 | 0 | 0 | 0 | 0 |
| 71.7620 | 5.2680 | -13.8830 | C | 0 | 0 | 0 | 0 | 0 | 0 | 0 | 0 | 0 | 0 | 0 | 0 | 0 |
| 72.4330 | 5.8690 | -14.5080 | H | 0 | 0 | 0 | 0 | 0 | 0 | 0 | 0 | 0 | 0 | 0 | 0 | 0 |
| 71.7910 | 5.6950 | -12.8730 | H | 0 | 0 | 0 | 0 | 0 | 0 | 0 | 0 | 0 | 0 | 0 | 0 | 0 |
| 72.2600 | 3.8220 | -13.8420 | C | 0 | 0 | 0 | 0 | 0 | 0 | 0 | 0 | 0 | 0 | 0 | 0 | 0 |
| 72.2300 | 3.3940 | -14.8520 | H | 0 | 0 | 0 | 0 | 0 | 0 | 0 | 0 | 0 | 0 | 0 | 0 | 0 |
| 71.5900 | 3.2200 | -13.2160 | H | 0 | 0 | 0 | 0 | 0 | 0 | 0 | 0 | 0 | 0 | 0 | 0 | 0 |
| 1       | 2      | 1        | 0 | 0 | 0 | 0 |   |   |   |   |   |   |   |   |   |   |
| 1       | 3      | 1        | 0 | 0 | 0 | 0 |   |   |   |   |   |   |   |   |   |   |
| 3       | 4      | 1        | 0 | 0 | 0 | 0 |   |   |   |   |   |   |   |   |   |   |
| 3       | 5      | 1        | 0 | 0 | 0 | 0 |   |   |   |   |   |   |   |   |   |   |
| 3       | 6      | 1        | 0 | 0 | 0 | 0 |   |   |   |   |   |   |   |   |   |   |
| 6       | 7      | 1        | 0 | 0 | 0 | 0 |   |   |   |   |   |   |   |   |   |   |
| 6       | 8      | 1        | 0 | 0 | 0 | 0 |   |   |   |   |   |   |   |   |   |   |
| 6       | 13     | 1        | 0 | 0 | 0 | 0 |   |   |   |   |   |   |   |   |   |   |
| 8       | 9      | 1        | 0 | 0 | 0 | 0 |   |   |   |   |   |   |   |   |   |   |
| 8       | 10     | 1        | 0 | 0 | 0 | 0 |   |   |   |   |   |   |   |   |   |   |
| 8       | 11     | 1        | 0 | 0 | 0 | 0 |   |   |   |   |   |   |   |   |   |   |
| 11      | 12     | 1        | 0 | 0 | 0 | 0 |   |   |   |   |   |   |   |   |   |   |
| 11      | 30     | 1        | 0 | 0 | 0 | 0 |   |   |   |   |   |   |   |   |   |   |
| 13      | 14     | 1        | 0 | 0 | 0 | 0 |   |   |   |   |   |   |   |   |   |   |
| 15      | 16     | 1        | 0 | 0 | 0 | 0 |   |   |   |   |   |   |   |   |   |   |
| 15      | 17     | 1        | 0 | 0 | 0 | 0 |   |   |   |   |   |   |   |   |   |   |
| 15      | 18     | 1        | 0 | 0 | 0 | 0 |   |   |   |   |   |   |   |   |   |   |
| 15      | 27     | 1        | 0 | 0 | 0 | 0 |   |   |   |   |   |   |   |   |   |   |
| 18      | 19     | 1        | 0 | 0 | 0 | 0 |   |   |   |   |   |   |   |   |   |   |
| 19      | 20     | 1        | 0 | 0 | 0 | 0 |   |   |   |   |   |   |   |   |   |   |
| 19      | 26     | 2        | 0 | 0 | 0 | 0 |   |   |   |   |   |   |   |   |   |   |
| 20      | 21     | 1        | 0 | 0 | 0 | 0 |   |   |   |   |   |   |   |   |   |   |
| 20      | 22     | 1        | 0 | 0 | 0 | 0 |   |   |   |   |   |   |   |   |   |   |
| 20      | 23     | 1        | 0 | 0 | 0 | 0 |   |   |   |   |   |   |   |   |   |   |
| 23      | 24     | 1        | 0 | 0 | 0 | 0 |   |   |   |   |   |   |   |   |   |   |
| 23      | 25     | 1        | 0 | 0 | 0 | 0 |   |   |   |   |   |   |   |   |   |   |
| 23      | 61     | 1        | 0 | 0 | 0 | 0 |   |   |   |   |   |   |   |   |   |   |
| 27      | 28     | 1        | 0 | 0 | 0 | 0 |   |   |   |   |   |   |   |   |   |   |
| 27      | 29     | 1        | 0 | 0 | 0 | 0 |   |   |   |   |   |   |   |   |   |   |
| 27      | 48     | 1        | 0 | 0 | 0 | 0 |   |   |   |   |   |   |   |   |   |   |
| 30      | 31     | 1        | 0 | 0 | 0 | 0 |   |   |   |   |   |   |   |   |   |   |
| 30      | 32     | 1        | 0 | 0 | 0 | 0 |   |   |   |   |   |   |   |   |   |   |
| 30      | 33     | 1        | 0 | 0 | 0 | 0 |   |   |   |   |   |   |   |   |   |   |
| 33      | 34     | 1        | 0 | 0 | 0 | 0 |   |   |   |   |   |   |   |   |   |   |
| 33      | 35     | 1        | 0 | 0 | 0 | 0 |   |   |   |   |   |   |   |   |   |   |
| 33      | 36     | 1        | 0 | 0 | 0 | 0 |   |   |   |   |   |   |   |   |   |   |
| 36      | 37     | 1        | 0 | 0 | 0 | 0 |   |   |   |   |   |   |   |   |   |   |
| 36      | 44     | 2        | 0 | 0 | 0 | 0 |   |   |   |   |   |   |   |   |   |   |
| 37      | 38     | 1        | 0 | 0 | 0 | 0 |   |   |   |   |   |   |   |   |   |   |
| 38      | 39     | 1        | 0 | 0 | 0 | 0 |   |   |   |   |   |   |   |   |   |   |
| 38      | 40     | 1        | 0 | 0 | 0 | 0 |   |   |   |   |   |   |   |   |   |   |
| 38      | 41     | 1        | 0 | 0 | 0 | 0 |   |   |   |   |   |   |   |   |   |   |
| 41      | 42     | 1        | 0 | 0 | 0 | 0 |   |   |   |   |   |   |   |   |   |   |
| 41      | 43     | 1        | 0 | 0 | 0 | 0 |   |   |   |   |   |   |   |   |   |   |
| 41      | 45     | 1        | 0 | 0 | 0 | 0 |   |   |   |   |   |   |   |   |   |   |
| 45      | 46     | 1        | 0 | 0 | 0 | 0 |   |   |   |   |   |   |   |   |   |   |
| 45      | 47     | 1        | 0 | 0 | 0 | 0 |   |   |   |   |   |   |   |   |   |   |
| 45      | 48     | 1        | 0 | 0 | 0 | 0 |   |   |   |   |   |   |   |   |   |   |
| 48      | 49     | 1        | 0 | 0 | 0 | 0 |   |   |   |   |   |   |   |   |   |   |
| 48      | 50     | 1        | 0 | 0 | 0 | 0 |   |   |   |   |   |   |   |   |   |   |
| 51      | 52     | 1        | 0 | 0 | 0 | 0 |   |   |   |   |   |   |   |   |   |   |
| 51      | 53     | 1        | 0 | 0 | 0 | 0 |   |   |   |   |   |   |   |   |   |   |
| 53      | 54     | 1        | 0 | 0 | 0 | 0 |   |   |   |   |   |   |   |   |   |   |
| 53      | 55     | 1        | 0 | 0 | 0 | 0 |   |   |   |   |   |   |   |   |   |   |
| 53      | 56     | 1        | 0 | 0 | 0 | 0 |   |   |   |   |   |   |   |   |   |   |
| 56      | 57     | 1        | 0 | 0 | 0 | 0 |   |   |   |   |   |   |   |   |   |   |
| 56      | 58     | 1        | 0 | 0 | 0 | 0 |   |   |   |   |   |   |   |   |   |   |

|     |     |   |   |   |   |   |
|-----|-----|---|---|---|---|---|
| 56  | 62  | 1 | 0 | 0 | 0 | 0 |
| 58  | 59  | 1 | 0 | 0 | 0 | 0 |
| 58  | 60  | 1 | 0 | 0 | 0 | 0 |
| 58  | 61  | 1 | 0 | 0 | 0 | 0 |
| 61  | 79  | 1 | 0 | 0 | 0 | 0 |
| 62  | 63  | 1 | 0 | 0 | 0 | 0 |
| 64  | 65  | 1 | 0 | 0 | 0 | 0 |
| 64  | 66  | 1 | 0 | 0 | 0 | 0 |
| 64  | 67  | 1 | 0 | 0 | 0 | 0 |
| 64  | 76  | 1 | 0 | 0 | 0 | 0 |
| 67  | 68  | 1 | 0 | 0 | 0 | 0 |
| 68  | 69  | 1 | 0 | 0 | 0 | 0 |
| 68  | 75  | 2 | 0 | 0 | 0 | 0 |
| 69  | 70  | 1 | 0 | 0 | 0 | 0 |
| 69  | 71  | 1 | 0 | 0 | 0 | 0 |
| 69  | 72  | 1 | 0 | 0 | 0 | 0 |
| 72  | 73  | 1 | 0 | 0 | 0 | 0 |
| 72  | 74  | 1 | 0 | 0 | 0 | 0 |
| 72  | 110 | 1 | 0 | 0 | 0 | 0 |
| 76  | 77  | 1 | 0 | 0 | 0 | 0 |
| 76  | 78  | 1 | 0 | 0 | 0 | 0 |
| 76  | 97  | 1 | 0 | 0 | 0 | 0 |
| 79  | 80  | 1 | 0 | 0 | 0 | 0 |
| 79  | 81  | 1 | 0 | 0 | 0 | 0 |
| 79  | 82  | 1 | 0 | 0 | 0 | 0 |
| 82  | 83  | 1 | 0 | 0 | 0 | 0 |
| 82  | 84  | 1 | 0 | 0 | 0 | 0 |
| 82  | 85  | 1 | 0 | 0 | 0 | 0 |
| 85  | 86  | 1 | 0 | 0 | 0 | 0 |
| 85  | 93  | 2 | 0 | 0 | 0 | 0 |
| 86  | 87  | 1 | 0 | 0 | 0 | 0 |
| 87  | 88  | 1 | 0 | 0 | 0 | 0 |
| 87  | 89  | 1 | 0 | 0 | 0 | 0 |
| 87  | 90  | 1 | 0 | 0 | 0 | 0 |
| 90  | 91  | 1 | 0 | 0 | 0 | 0 |
| 90  | 92  | 1 | 0 | 0 | 0 | 0 |
| 90  | 94  | 1 | 0 | 0 | 0 | 0 |
| 94  | 95  | 1 | 0 | 0 | 0 | 0 |
| 94  | 96  | 1 | 0 | 0 | 0 | 0 |
| 94  | 97  | 1 | 0 | 0 | 0 | 0 |
| 97  | 98  | 1 | 0 | 0 | 0 | 0 |
| 97  | 99  | 1 | 0 | 0 | 0 | 0 |
| 100 | 101 | 1 | 0 | 0 | 0 | 0 |
| 100 | 102 | 1 | 0 | 0 | 0 | 0 |
| 102 | 103 | 1 | 0 | 0 | 0 | 0 |
| 102 | 104 | 1 | 0 | 0 | 0 | 0 |
| 102 | 105 | 1 | 0 | 0 | 0 | 0 |
| 105 | 106 | 1 | 0 | 0 | 0 | 0 |
| 105 | 107 | 1 | 0 | 0 | 0 | 0 |
| 105 | 111 | 1 | 0 | 0 | 0 | 0 |
| 107 | 108 | 1 | 0 | 0 | 0 | 0 |
| 107 | 109 | 1 | 0 | 0 | 0 | 0 |
| 107 | 110 | 1 | 0 | 0 | 0 | 0 |
| 110 | 128 | 1 | 0 | 0 | 0 | 0 |
| 111 | 112 | 1 | 0 | 0 | 0 | 0 |
| 113 | 114 | 1 | 0 | 0 | 0 | 0 |
| 113 | 115 | 1 | 0 | 0 | 0 | 0 |
| 113 | 116 | 1 | 0 | 0 | 0 | 0 |
| 113 | 125 | 1 | 0 | 0 | 0 | 0 |
| 116 | 117 | 1 | 0 | 0 | 0 | 0 |
| 117 | 118 | 1 | 0 | 0 | 0 | 0 |
| 117 | 124 | 2 | 0 | 0 | 0 | 0 |
| 118 | 119 | 1 | 0 | 0 | 0 | 0 |
| 118 | 120 | 1 | 0 | 0 | 0 | 0 |
| 118 | 121 | 1 | 0 | 0 | 0 | 0 |
| 121 | 122 | 1 | 0 | 0 | 0 | 0 |
| 121 | 123 | 1 | 0 | 0 | 0 | 0 |
| 121 | 159 | 1 | 0 | 0 | 0 | 0 |
| 125 | 126 | 1 | 0 | 0 | 0 | 0 |
| 125 | 127 | 1 | 0 | 0 | 0 | 0 |
| 125 | 146 | 1 | 0 | 0 | 0 | 0 |
| 128 | 129 | 1 | 0 | 0 | 0 | 0 |
| 128 | 130 | 1 | 0 | 0 | 0 | 0 |
| 128 | 131 | 1 | 0 | 0 | 0 | 0 |
| 131 | 132 | 1 | 0 | 0 | 0 | 0 |
| 131 | 133 | 1 | 0 | 0 | 0 | 0 |
| 131 | 134 | 1 | 0 | 0 | 0 | 0 |
| 134 | 135 | 1 | 0 | 0 | 0 | 0 |
| 134 | 142 | 2 | 0 | 0 | 0 | 0 |
| 135 | 136 | 1 | 0 | 0 | 0 | 0 |
| 136 | 137 | 1 | 0 | 0 | 0 | 0 |

|        |   |   |   |   |   |
|--------|---|---|---|---|---|
| 136138 | 1 | 0 | 0 | 0 | 0 |
| 136139 | 1 | 0 | 0 | 0 | 0 |
| 139140 | 1 | 0 | 0 | 0 | 0 |
| 139141 | 1 | 0 | 0 | 0 | 0 |
| 139143 | 1 | 0 | 0 | 0 | 0 |
| 143144 | 1 | 0 | 0 | 0 | 0 |
| 143145 | 1 | 0 | 0 | 0 | 0 |
| 143146 | 1 | 0 | 0 | 0 | 0 |
| 146147 | 1 | 0 | 0 | 0 | 0 |
| 146148 | 1 | 0 | 0 | 0 | 0 |
| 149150 | 1 | 0 | 0 | 0 | 0 |
| 149151 | 1 | 0 | 0 | 0 | 0 |
| 151152 | 1 | 0 | 0 | 0 | 0 |
| 151153 | 1 | 0 | 0 | 0 | 0 |
| 151154 | 1 | 0 | 0 | 0 | 0 |
| 154155 | 1 | 0 | 0 | 0 | 0 |
| 154156 | 1 | 0 | 0 | 0 | 0 |
| 154160 | 1 | 0 | 0 | 0 | 0 |
| 156157 | 1 | 0 | 0 | 0 | 0 |
| 156158 | 1 | 0 | 0 | 0 | 0 |
| 156159 | 1 | 0 | 0 | 0 | 0 |
| 159177 | 1 | 0 | 0 | 0 | 0 |
| 160161 | 1 | 0 | 0 | 0 | 0 |
| 162163 | 1 | 0 | 0 | 0 | 0 |
| 162164 | 1 | 0 | 0 | 0 | 0 |
| 162165 | 1 | 0 | 0 | 0 | 0 |
| 162174 | 1 | 0 | 0 | 0 | 0 |
| 165166 | 1 | 0 | 0 | 0 | 0 |
| 166167 | 1 | 0 | 0 | 0 | 0 |
| 166173 | 2 | 0 | 0 | 0 | 0 |
| 167168 | 1 | 0 | 0 | 0 | 0 |
| 167169 | 1 | 0 | 0 | 0 | 0 |
| 167170 | 1 | 0 | 0 | 0 | 0 |
| 170171 | 1 | 0 | 0 | 0 | 0 |
| 170172 | 1 | 0 | 0 | 0 | 0 |
| 170208 | 1 | 0 | 0 | 0 | 0 |
| 174175 | 1 | 0 | 0 | 0 | 0 |
| 174176 | 1 | 0 | 0 | 0 | 0 |
| 174195 | 1 | 0 | 0 | 0 | 0 |
| 177178 | 1 | 0 | 0 | 0 | 0 |
| 177179 | 1 | 0 | 0 | 0 | 0 |
| 177180 | 1 | 0 | 0 | 0 | 0 |
| 180181 | 1 | 0 | 0 | 0 | 0 |
| 180182 | 1 | 0 | 0 | 0 | 0 |
| 180183 | 1 | 0 | 0 | 0 | 0 |
| 183184 | 1 | 0 | 0 | 0 | 0 |
| 183191 | 2 | 0 | 0 | 0 | 0 |
| 184185 | 1 | 0 | 0 | 0 | 0 |
| 185186 | 1 | 0 | 0 | 0 | 0 |
| 185187 | 1 | 0 | 0 | 0 | 0 |
| 185188 | 1 | 0 | 0 | 0 | 0 |
| 188189 | 1 | 0 | 0 | 0 | 0 |
| 188190 | 1 | 0 | 0 | 0 | 0 |
| 188192 | 1 | 0 | 0 | 0 | 0 |
| 192193 | 1 | 0 | 0 | 0 | 0 |
| 192194 | 1 | 0 | 0 | 0 | 0 |
| 192195 | 1 | 0 | 0 | 0 | 0 |
| 195196 | 1 | 0 | 0 | 0 | 0 |
| 195197 | 1 | 0 | 0 | 0 | 0 |
| 198199 | 1 | 0 | 0 | 0 | 0 |
| 198200 | 1 | 0 | 0 | 0 | 0 |
| 200201 | 1 | 0 | 0 | 0 | 0 |
| 200202 | 1 | 0 | 0 | 0 | 0 |
| 200203 | 1 | 0 | 0 | 0 | 0 |
| 203204 | 1 | 0 | 0 | 0 | 0 |
| 203205 | 1 | 0 | 0 | 0 | 0 |
| 203209 | 1 | 0 | 0 | 0 | 0 |
| 205206 | 1 | 0 | 0 | 0 | 0 |
| 205207 | 1 | 0 | 0 | 0 | 0 |
| 205208 | 1 | 0 | 0 | 0 | 0 |
| 208227 | 1 | 0 | 0 | 0 | 0 |
| 209210 | 1 | 0 | 0 | 0 | 0 |
| 211212 | 1 | 0 | 0 | 0 | 0 |
| 211213 | 1 | 0 | 0 | 0 | 0 |
| 211214 | 1 | 0 | 0 | 0 | 0 |
| 211224 | 1 | 0 | 0 | 0 | 0 |
| 214215 | 1 | 0 | 0 | 0 | 0 |
| 215216 | 1 | 0 | 0 | 0 | 0 |
| 215223 | 2 | 0 | 0 | 0 | 0 |
| 216217 | 1 | 0 | 0 | 0 | 0 |
| 216218 | 1 | 0 | 0 | 0 | 0 |

216219 1 0 0 0 0  
219220 1 0 0 0 0  
219221 1 0 0 0 0  
219222 1 0 0 0 0  
224225 1 0 0 0 0  
224226 1 0 0 0 0  
224245 1 0 0 0 0  
227228 1 0 0 0 0  
227229 1 0 0 0 0  
227230 1 0 0 0 0  
230231 1 0 0 0 0  
230232 1 0 0 0 0  
230233 1 0 0 0 0  
233234 1 0 0 0 0  
233241 2 0 0 0 0  
234235 1 0 0 0 0  
235236 1 0 0 0 0  
235237 1 0 0 0 0  
235238 1 0 0 0 0  
238239 1 0 0 0 0  
238240 1 0 0 0 0  
238242 1 0 0 0 0  
242243 1 0 0 0 0  
242244 1 0 0 0 0  
242245 1 0 0 0 0  
245246 1 0 0 0 0  
245247 1 0 0 0 0

M END  
> <NAME>  
E24\_1

\$\$\$\$  
E32\_1  
MOE2012 3D

272271 0 0 1 0 0 0 0 0999 V2000  
-4.7830 -2.4740 -7.4950 O 0 0 0 0 0 0 0 0 0 0 0 0 0 0 0  
-5.5490 -2.8970 -7.9190 H 0 0 0 0 0 0 0 0 0 0 0 0 0 0 0  
-3.6710 -2.6570 -8.3600 C 0 0 0 0 0 0 0 0 0 0 0 0 0 0 0  
-3.5170 -3.7310 -8.5050 H 0 0 0 0 0 0 0 0 0 0 0 0 0 0 0  
-3.9010 -2.1960 -9.3250 H 0 0 0 0 0 0 0 0 0 0 0 0 0 0 0  
-2.4470 -2.0130 -7.7260 C 0 0 0 0 0 0 0 0 0 0 0 0 0 0 0  
-2.6500 -0.9500 -7.5420 H 0 0 0 0 0 0 0 0 0 0 0 0 0 0 0  
-2.2710 -2.4590 -6.7390 H 0 0 0 0 0 0 0 0 0 0 0 0 0 0 0  
-1.2080 -2.1690 -8.6050 C 0 0 0 0 0 0 0 0 0 0 0 0 0 0 0  
-1.0120 -3.2350 -8.7780 H 0 0 0 0 0 0 0 0 0 0 0 0 0 0 0  
-1.3920 -1.7110 -9.5840 H 0 0 0 0 0 0 0 0 0 0 0 0 0 0 0  
0.0180 -1.5210 -7.9580 C 0 0 0 0 0 0 0 0 0 0 0 0 0 0 0  
-0.1820 -0.4570 -7.7830 H 0 0 0 0 0 0 0 0 0 0 0 0 0 0 0  
0.2000 -1.9810 -6.9780 H 0 0 0 0 0 0 0 0 0 0 0 0 0 0 0  
1.2580 -1.6790 -8.8410 C 0 0 0 0 0 0 0 0 0 0 0 0 0 0 0  
1.4510 -2.7450 -9.0090 H 0 0 0 0 0 0 0 0 0 0 0 0 0 0 0  
1.0770 -1.2070 -9.8140 H 0 0 0 0 0 0 0 0 0 0 0 0 0 0 0  
2.4110 -1.0610 -8.1840 N 0 0 0 3 0 0 0 0 0 0 0 0 0 0 0  
2.2140 -0.0760 -8.0050 H 0 0 0 0 0 0 0 0 0 0 0 0 0 0 0  
14.3230 1.6110 -7.7400 C 0 0 0 0 0 0 0 0 0 0 0 0 0 0 0  
14.4040 1.0550 -6.7990 H 0 0 0 0 0 0 0 0 0 0 0 0 0 0 0  
14.0690 2.6560 -7.5280 H 0 0 0 0 0 0 0 0 0 0 0 0 0 0 0  
15.5770 1.5560 -8.4350 O 0 0 0 0 0 0 0 0 0 0 0 0 0 0 0  
16.6280 2.1000 -7.7540 C 0 0 0 0 0 0 0 0 0 0 0 0 0 0 0  
17.8750 2.0010 -8.5930 C 0 0 0 0 0 0 0 0 0 0 0 0 0 0 0  
17.9410 0.9860 -9.0020 H 0 0 0 0 0 0 0 0 0 0 0 0 0 0 0  
17.7620 2.7170 -9.4120 H 0 0 0 0 0 0 0 0 0 0 0 0 0 0 0  
19.1240 2.2990 -7.7590 C 0 0 0 0 0 0 0 0 0 0 0 0 0 0 0  
19.0680 3.3160 -7.3500 H 0 0 0 0 0 0 0 0 0 0 0 0 0 0 0  
19.1080 1.6250 -6.8910 H 0 0 0 0 0 0 0 0 0 0 0 0 0 0 0  
16.5570 2.6120 -6.6460 O 0 0 0 0 0 0 0 0 0 0 0 0 0 0 0  
13.2560 0.9830 -8.6300 C 0 0 0 0 0 0 0 0 0 0 0 0 0 0 0  
13.2220 1.5170 -9.5880 H 0 0 0 0 0 0 0 0 0 0 0 0 0 0 0  
13.5450 -0.0480 -8.8720 H 0 0 0 0 0 0 0 0 0 0 0 0 0 0 0  
3.6150 -1.1840 -9.0090 C 0 0 0 0 0 0 0 0 0 0 0 0 0 0 0  
3.8250 -2.2420 -9.2110 H 0 0 0 0 0 0 0 0 0 0 0 0 0 0 0  
3.4650 -0.6850 -9.9750 H 0 0 0 0 0 0 0 0 0 0 0 0 0 0 0  
4.8060 -0.5610 -8.2850 C 0 0 0 0 0 0 0 0 0 0 0 0 0 0 0  
4.6220 0.5040 -8.1000 H 0 0 0 0 0 0 0 0 0 0 0 0 0 0 0  
4.9700 -1.0690 -7.3280 H 0 0 0 0 0 0 0 0 0 0 0 0 0 0 0  
6.0630 -0.6850 -9.1070 C 0 0 0 0 0 0 0 0 0 0 0 0 0 0 0  
7.1130 -0.1620 -8.4110 O 0 0 0 0 0 0 0 0 0 0 0 0 0 0 0  
8.3720 -0.2220 -9.0980 C 0 0 0 0 0 0 0 0 0 0 0 0 0 0 0  
8.6210 -1.2680 -9.3100 H 0 0 0 0 0 0 0 0 0 0 0 0 0 0 0  
8.2990 0.3370 -10.0390 H 0 0 0 0 0 0 0 0 0 0 0 0 0 0 0









|    |     |   |   |   |   |   |
|----|-----|---|---|---|---|---|
| 15 | 18  | 1 | 0 | 0 | 0 | 0 |
| 18 | 19  | 1 | 0 | 0 | 0 | 0 |
| 18 | 35  | 1 | 0 | 0 | 0 | 0 |
| 20 | 21  | 1 | 0 | 0 | 0 | 0 |
| 20 | 22  | 1 | 0 | 0 | 0 | 0 |
| 20 | 23  | 1 | 0 | 0 | 0 | 0 |
| 20 | 32  | 1 | 0 | 0 | 0 | 0 |
| 23 | 24  | 1 | 0 | 0 | 0 | 0 |
| 24 | 25  | 1 | 0 | 0 | 0 | 0 |
| 24 | 31  | 2 | 0 | 0 | 0 | 0 |
| 25 | 26  | 1 | 0 | 0 | 0 | 0 |
| 25 | 27  | 1 | 0 | 0 | 0 | 0 |
| 25 | 28  | 1 | 0 | 0 | 0 | 0 |
| 28 | 29  | 1 | 0 | 0 | 0 | 0 |
| 28 | 30  | 1 | 0 | 0 | 0 | 0 |
| 28 | 73  | 1 | 0 | 0 | 0 | 0 |
| 32 | 33  | 1 | 0 | 0 | 0 | 0 |
| 32 | 34  | 1 | 0 | 0 | 0 | 0 |
| 32 | 53  | 1 | 0 | 0 | 0 | 0 |
| 35 | 36  | 1 | 0 | 0 | 0 | 0 |
| 35 | 37  | 1 | 0 | 0 | 0 | 0 |
| 35 | 38  | 1 | 0 | 0 | 0 | 0 |
| 38 | 39  | 1 | 0 | 0 | 0 | 0 |
| 38 | 40  | 1 | 0 | 0 | 0 | 0 |
| 38 | 41  | 1 | 0 | 0 | 0 | 0 |
| 41 | 42  | 1 | 0 | 0 | 0 | 0 |
| 41 | 49  | 2 | 0 | 0 | 0 | 0 |
| 42 | 43  | 1 | 0 | 0 | 0 | 0 |
| 43 | 44  | 1 | 0 | 0 | 0 | 0 |
| 43 | 45  | 1 | 0 | 0 | 0 | 0 |
| 43 | 46  | 1 | 0 | 0 | 0 | 0 |
| 46 | 47  | 1 | 0 | 0 | 0 | 0 |
| 46 | 48  | 1 | 0 | 0 | 0 | 0 |
| 46 | 50  | 1 | 0 | 0 | 0 | 0 |
| 50 | 51  | 1 | 0 | 0 | 0 | 0 |
| 50 | 52  | 1 | 0 | 0 | 0 | 0 |
| 50 | 53  | 1 | 0 | 0 | 0 | 0 |
| 53 | 54  | 1 | 0 | 0 | 0 | 0 |
| 53 | 55  | 1 | 0 | 0 | 0 | 0 |
| 56 | 57  | 1 | 0 | 0 | 0 | 0 |
| 56 | 58  | 1 | 0 | 0 | 0 | 0 |
| 58 | 59  | 1 | 0 | 0 | 0 | 0 |
| 58 | 60  | 1 | 0 | 0 | 0 | 0 |
| 58 | 61  | 1 | 0 | 0 | 0 | 0 |
| 61 | 62  | 1 | 0 | 0 | 0 | 0 |
| 61 | 63  | 1 | 0 | 0 | 0 | 0 |
| 61 | 64  | 1 | 0 | 0 | 0 | 0 |
| 64 | 65  | 1 | 0 | 0 | 0 | 0 |
| 64 | 66  | 1 | 0 | 0 | 0 | 0 |
| 64 | 67  | 1 | 0 | 0 | 0 | 0 |
| 67 | 68  | 1 | 0 | 0 | 0 | 0 |
| 67 | 69  | 1 | 0 | 0 | 0 | 0 |
| 67 | 70  | 1 | 0 | 0 | 0 | 0 |
| 70 | 71  | 1 | 0 | 0 | 0 | 0 |
| 70 | 72  | 1 | 0 | 0 | 0 | 0 |
| 70 | 73  | 1 | 0 | 0 | 0 | 0 |
| 73 | 89  | 1 | 0 | 0 | 0 | 0 |
| 74 | 75  | 1 | 0 | 0 | 0 | 0 |
| 74 | 76  | 1 | 0 | 0 | 0 | 0 |
| 74 | 77  | 1 | 0 | 0 | 0 | 0 |
| 74 | 86  | 1 | 0 | 0 | 0 | 0 |
| 77 | 78  | 1 | 0 | 0 | 0 | 0 |
| 78 | 79  | 1 | 0 | 0 | 0 | 0 |
| 78 | 85  | 2 | 0 | 0 | 0 | 0 |
| 79 | 80  | 1 | 0 | 0 | 0 | 0 |
| 79 | 81  | 1 | 0 | 0 | 0 | 0 |
| 79 | 82  | 1 | 0 | 0 | 0 | 0 |
| 82 | 83  | 1 | 0 | 0 | 0 | 0 |
| 82 | 84  | 1 | 0 | 0 | 0 | 0 |
| 82 | 127 | 1 | 0 | 0 | 0 | 0 |
| 86 | 87  | 1 | 0 | 0 | 0 | 0 |
| 86 | 88  | 1 | 0 | 0 | 0 | 0 |
| 86 | 107 | 1 | 0 | 0 | 0 | 0 |
| 89 | 90  | 1 | 0 | 0 | 0 | 0 |
| 89 | 91  | 1 | 0 | 0 | 0 | 0 |
| 89 | 92  | 1 | 0 | 0 | 0 | 0 |
| 92 | 93  | 1 | 0 | 0 | 0 | 0 |
| 92 | 94  | 1 | 0 | 0 | 0 | 0 |
| 92 | 95  | 1 | 0 | 0 | 0 | 0 |
| 95 | 96  | 1 | 0 | 0 | 0 | 0 |
| 95 | 103 | 2 | 0 | 0 | 0 | 0 |

|     |     |   |   |   |   |   |
|-----|-----|---|---|---|---|---|
| 96  | 97  | 1 | 0 | 0 | 0 | 0 |
| 97  | 98  | 1 | 0 | 0 | 0 | 0 |
| 97  | 99  | 1 | 0 | 0 | 0 | 0 |
| 97  | 100 | 1 | 0 | 0 | 0 | 0 |
| 100 | 101 | 1 | 0 | 0 | 0 | 0 |
| 100 | 102 | 1 | 0 | 0 | 0 | 0 |
| 100 | 104 | 1 | 0 | 0 | 0 | 0 |
| 104 | 105 | 1 | 0 | 0 | 0 | 0 |
| 104 | 106 | 1 | 0 | 0 | 0 | 0 |
| 104 | 107 | 1 | 0 | 0 | 0 | 0 |
| 107 | 108 | 1 | 0 | 0 | 0 | 0 |
| 107 | 109 | 1 | 0 | 0 | 0 | 0 |
| 110 | 111 | 1 | 0 | 0 | 0 | 0 |
| 110 | 112 | 1 | 0 | 0 | 0 | 0 |
| 112 | 113 | 1 | 0 | 0 | 0 | 0 |
| 112 | 114 | 1 | 0 | 0 | 0 | 0 |
| 112 | 115 | 1 | 0 | 0 | 0 | 0 |
| 115 | 116 | 1 | 0 | 0 | 0 | 0 |
| 115 | 117 | 1 | 0 | 0 | 0 | 0 |
| 115 | 118 | 1 | 0 | 0 | 0 | 0 |
| 118 | 119 | 1 | 0 | 0 | 0 | 0 |
| 118 | 120 | 1 | 0 | 0 | 0 | 0 |
| 118 | 121 | 1 | 0 | 0 | 0 | 0 |
| 121 | 122 | 1 | 0 | 0 | 0 | 0 |
| 121 | 123 | 1 | 0 | 0 | 0 | 0 |
| 121 | 124 | 1 | 0 | 0 | 0 | 0 |
| 124 | 125 | 1 | 0 | 0 | 0 | 0 |
| 124 | 126 | 1 | 0 | 0 | 0 | 0 |
| 124 | 127 | 1 | 0 | 0 | 0 | 0 |
| 127 | 143 | 1 | 0 | 0 | 0 | 0 |
| 128 | 129 | 1 | 0 | 0 | 0 | 0 |
| 128 | 130 | 1 | 0 | 0 | 0 | 0 |
| 128 | 131 | 1 | 0 | 0 | 0 | 0 |
| 128 | 140 | 1 | 0 | 0 | 0 | 0 |
| 131 | 132 | 1 | 0 | 0 | 0 | 0 |
| 132 | 133 | 1 | 0 | 0 | 0 | 0 |
| 132 | 139 | 2 | 0 | 0 | 0 | 0 |
| 133 | 134 | 1 | 0 | 0 | 0 | 0 |
| 133 | 135 | 1 | 0 | 0 | 0 | 0 |
| 133 | 136 | 1 | 0 | 0 | 0 | 0 |
| 136 | 137 | 1 | 0 | 0 | 0 | 0 |
| 136 | 138 | 1 | 0 | 0 | 0 | 0 |
| 136 | 181 | 1 | 0 | 0 | 0 | 0 |
| 140 | 141 | 1 | 0 | 0 | 0 | 0 |
| 140 | 142 | 1 | 0 | 0 | 0 | 0 |
| 140 | 161 | 1 | 0 | 0 | 0 | 0 |
| 143 | 144 | 1 | 0 | 0 | 0 | 0 |
| 143 | 145 | 1 | 0 | 0 | 0 | 0 |
| 143 | 146 | 1 | 0 | 0 | 0 | 0 |
| 146 | 147 | 1 | 0 | 0 | 0 | 0 |
| 146 | 148 | 1 | 0 | 0 | 0 | 0 |
| 146 | 149 | 1 | 0 | 0 | 0 | 0 |
| 149 | 150 | 1 | 0 | 0 | 0 | 0 |
| 149 | 157 | 2 | 0 | 0 | 0 | 0 |
| 150 | 151 | 1 | 0 | 0 | 0 | 0 |
| 151 | 152 | 1 | 0 | 0 | 0 | 0 |
| 151 | 153 | 1 | 0 | 0 | 0 | 0 |
| 151 | 154 | 1 | 0 | 0 | 0 | 0 |
| 154 | 155 | 1 | 0 | 0 | 0 | 0 |
| 154 | 156 | 1 | 0 | 0 | 0 | 0 |
| 154 | 158 | 1 | 0 | 0 | 0 | 0 |
| 158 | 159 | 1 | 0 | 0 | 0 | 0 |
| 158 | 160 | 1 | 0 | 0 | 0 | 0 |
| 158 | 161 | 1 | 0 | 0 | 0 | 0 |
| 161 | 162 | 1 | 0 | 0 | 0 | 0 |
| 161 | 163 | 1 | 0 | 0 | 0 | 0 |
| 164 | 165 | 1 | 0 | 0 | 0 | 0 |
| 164 | 166 | 1 | 0 | 0 | 0 | 0 |
| 166 | 167 | 1 | 0 | 0 | 0 | 0 |
| 166 | 168 | 1 | 0 | 0 | 0 | 0 |
| 166 | 169 | 1 | 0 | 0 | 0 | 0 |
| 169 | 170 | 1 | 0 | 0 | 0 | 0 |
| 169 | 171 | 1 | 0 | 0 | 0 | 0 |
| 169 | 172 | 1 | 0 | 0 | 0 | 0 |
| 172 | 173 | 1 | 0 | 0 | 0 | 0 |
| 172 | 174 | 1 | 0 | 0 | 0 | 0 |
| 172 | 175 | 1 | 0 | 0 | 0 | 0 |
| 175 | 176 | 1 | 0 | 0 | 0 | 0 |
| 175 | 177 | 1 | 0 | 0 | 0 | 0 |
| 175 | 178 | 1 | 0 | 0 | 0 | 0 |
| 178 | 179 | 1 | 0 | 0 | 0 | 0 |

|        |   |   |   |   |   |
|--------|---|---|---|---|---|
| 178180 | 1 | 0 | 0 | 0 | 0 |
| 178181 | 1 | 0 | 0 | 0 | 0 |
| 181197 | 1 | 0 | 0 | 0 | 0 |
| 182183 | 1 | 0 | 0 | 0 | 0 |
| 182184 | 1 | 0 | 0 | 0 | 0 |
| 182185 | 1 | 0 | 0 | 0 | 0 |
| 182194 | 1 | 0 | 0 | 0 | 0 |
| 185186 | 1 | 0 | 0 | 0 | 0 |
| 186187 | 1 | 0 | 0 | 0 | 0 |
| 186193 | 2 | 0 | 0 | 0 | 0 |
| 187188 | 1 | 0 | 0 | 0 | 0 |
| 187189 | 1 | 0 | 0 | 0 | 0 |
| 187190 | 1 | 0 | 0 | 0 | 0 |
| 190191 | 1 | 0 | 0 | 0 | 0 |
| 190192 | 1 | 0 | 0 | 0 | 0 |
| 190235 | 1 | 0 | 0 | 0 | 0 |
| 194195 | 1 | 0 | 0 | 0 | 0 |
| 194196 | 1 | 0 | 0 | 0 | 0 |
| 194215 | 1 | 0 | 0 | 0 | 0 |
| 197198 | 1 | 0 | 0 | 0 | 0 |
| 197199 | 1 | 0 | 0 | 0 | 0 |
| 197200 | 1 | 0 | 0 | 0 | 0 |
| 200201 | 1 | 0 | 0 | 0 | 0 |
| 200202 | 1 | 0 | 0 | 0 | 0 |
| 200203 | 1 | 0 | 0 | 0 | 0 |
| 203204 | 1 | 0 | 0 | 0 | 0 |
| 203211 | 2 | 0 | 0 | 0 | 0 |
| 204205 | 1 | 0 | 0 | 0 | 0 |
| 205206 | 1 | 0 | 0 | 0 | 0 |
| 205207 | 1 | 0 | 0 | 0 | 0 |
| 205208 | 1 | 0 | 0 | 0 | 0 |
| 208209 | 1 | 0 | 0 | 0 | 0 |
| 208210 | 1 | 0 | 0 | 0 | 0 |
| 208212 | 1 | 0 | 0 | 0 | 0 |
| 212213 | 1 | 0 | 0 | 0 | 0 |
| 212214 | 1 | 0 | 0 | 0 | 0 |
| 212215 | 1 | 0 | 0 | 0 | 0 |
| 215216 | 1 | 0 | 0 | 0 | 0 |
| 215217 | 1 | 0 | 0 | 0 | 0 |
| 218219 | 1 | 0 | 0 | 0 | 0 |
| 218220 | 1 | 0 | 0 | 0 | 0 |
| 220221 | 1 | 0 | 0 | 0 | 0 |
| 220222 | 1 | 0 | 0 | 0 | 0 |
| 220223 | 1 | 0 | 0 | 0 | 0 |
| 223224 | 1 | 0 | 0 | 0 | 0 |
| 223225 | 1 | 0 | 0 | 0 | 0 |
| 223226 | 1 | 0 | 0 | 0 | 0 |
| 226227 | 1 | 0 | 0 | 0 | 0 |
| 226228 | 1 | 0 | 0 | 0 | 0 |
| 226229 | 1 | 0 | 0 | 0 | 0 |
| 229230 | 1 | 0 | 0 | 0 | 0 |
| 229231 | 1 | 0 | 0 | 0 | 0 |
| 229232 | 1 | 0 | 0 | 0 | 0 |
| 232233 | 1 | 0 | 0 | 0 | 0 |
| 232234 | 1 | 0 | 0 | 0 | 0 |
| 232235 | 1 | 0 | 0 | 0 | 0 |
| 235252 | 1 | 0 | 0 | 0 | 0 |
| 236237 | 1 | 0 | 0 | 0 | 0 |
| 236238 | 1 | 0 | 0 | 0 | 0 |
| 236239 | 1 | 0 | 0 | 0 | 0 |
| 236249 | 1 | 0 | 0 | 0 | 0 |
| 239240 | 1 | 0 | 0 | 0 | 0 |
| 240241 | 1 | 0 | 0 | 0 | 0 |
| 240248 | 2 | 0 | 0 | 0 | 0 |
| 241242 | 1 | 0 | 0 | 0 | 0 |
| 241243 | 1 | 0 | 0 | 0 | 0 |
| 241244 | 1 | 0 | 0 | 0 | 0 |
| 244245 | 1 | 0 | 0 | 0 | 0 |
| 244246 | 1 | 0 | 0 | 0 | 0 |
| 244247 | 1 | 0 | 0 | 0 | 0 |
| 249250 | 1 | 0 | 0 | 0 | 0 |
| 249251 | 1 | 0 | 0 | 0 | 0 |
| 249270 | 1 | 0 | 0 | 0 | 0 |
| 252253 | 1 | 0 | 0 | 0 | 0 |
| 252254 | 1 | 0 | 0 | 0 | 0 |
| 252255 | 1 | 0 | 0 | 0 | 0 |
| 255256 | 1 | 0 | 0 | 0 | 0 |
| 255257 | 1 | 0 | 0 | 0 | 0 |
| 255258 | 1 | 0 | 0 | 0 | 0 |
| 258259 | 1 | 0 | 0 | 0 | 0 |
| 258266 | 2 | 0 | 0 | 0 | 0 |

259260 1 0 0 0 0  
260261 1 0 0 0 0  
260262 1 0 0 0 0  
260263 1 0 0 0 0  
263264 1 0 0 0 0  
263265 1 0 0 0 0  
263267 1 0 0 0 0  
267268 1 0 0 0 0  
267269 1 0 0 0 0  
267270 1 0 0 0 0  
270271 1 0 0 0 0  
270272 1 0 0 0 0

M END  
> <NAME>  
E32\_1

\$\$\$\$  
E36\_1  
MOE2012 3D

287286 0 0 1 0 0 0 0 0999 V2000  
9.9650 2.9840 -15.0650 O 0 0 0 0 0 0 0 0 0 0 0 0 0 0 0  
9.1370 3.4590 -14.8820 H 0 0 0 0 0 0 0 0 0 0 0 0 0 0 0  
10.8710 3.3110 -14.0190 C 0 0 0 0 0 0 0 0 0 0 0 0 0 0 0  
11.0180 4.3950 -14.0130 H 0 0 0 0 0 0 0 0 0 0 0 0 0 0 0  
10.4250 3.0070 -13.0660 H 0 0 0 0 0 0 0 0 0 0 0 0 0 0 0  
12.1900 2.5850 -14.2560 C 0 0 0 0 0 0 0 0 0 0 0 0 0 0 0  
12.0060 1.5050 -14.3040 H 0 0 0 0 0 0 0 0 0 0 0 0 0 0 0  
12.5860 2.8660 -15.2400 H 0 0 0 0 0 0 0 0 0 0 0 0 0 0 0  
13.2130 2.9000 -13.1650 C 0 0 0 0 0 0 0 0 0 0 0 0 0 0 0  
13.3910 3.9810 -13.1310 H 0 0 0 0 0 0 0 0 0 0 0 0 0 0 0  
12.8090 2.6080 -12.1880 H 0 0 0 0 0 0 0 0 0 0 0 0 0 0 0  
14.5380 2.1710 -13.4080 C 0 0 0 0 0 0 0 0 0 0 0 0 0 0 0  
14.3620 1.0890 -13.4350 H 0 0 0 0 0 0 0 0 0 0 0 0 0 0 0  
14.9400 2.4580 -14.3880 H 0 0 0 0 0 0 0 0 0 0 0 0 0 0 0  
15.5640 2.4970 -12.3180 C 0 0 0 0 0 0 0 0 0 0 0 0 0 0 0  
15.7310 3.5810 -12.2900 H 0 0 0 0 0 0 0 0 0 0 0 0 0 0 0  
15.1620 2.2060 -11.3400 H 0 0 0 0 0 0 0 0 0 0 0 0 0 0 0  
16.8940 1.7750 -12.5660 C 0 0 0 0 0 0 0 0 0 0 0 0 0 0 0  
16.7120 0.6950 -12.5850 H 0 0 0 0 0 0 0 0 0 0 0 0 0 0 0  
17.2910 2.0730 -13.5430 H 0 0 0 0 0 0 0 0 0 0 0 0 0 0 0  
17.8460 2.1140 -11.5040 N 0 0 3 0 0 0 0 0 0 0 0 0 0 0 0  
17.9160 3.1310 -11.4440 H 0 0 0 0 0 0 0 0 0 0 0 0 0 0 0  
24.3530 -8.2290 -10.5900 C 0 0 0 0 0 0 0 0 0 0 0 0 0 0 0  
23.6950 -8.7240 -11.3130 H 0 0 0 0 0 0 0 0 0 0 0 0 0 0 0  
23.9470 -8.3530 -9.5790 H 0 0 0 0 0 0 0 0 0 0 0 0 0 0 0  
25.6600 -8.8180 -10.6550 O 0 0 0 0 0 0 0 0 0 0 0 0 0 0 0  
25.6920 -10.1500 -10.3650 C 0 0 0 0 0 0 0 0 0 0 0 0 0 0 0  
27.1130 -10.6480 -10.4530 C 0 0 0 0 0 0 0 0 0 0 0 0 0 0 0  
27.4710 -10.4820 -11.4760 H 0 0 0 0 0 0 0 0 0 0 0 0 0 0 0  
27.7200 -10.0540 -9.7630 H 0 0 0 0 0 0 0 0 0 0 0 0 0 0 0  
27.1900 -12.1350 -10.1090 C 0 0 0 0 0 0 0 0 0 0 0 0 0 0 0  
26.7290 -12.3410 -9.1340 H 0 0 0 0 0 0 0 0 0 0 0 0 0 0 0  
26.5660 -12.6790 -10.8320 H 0 0 0 0 0 0 0 0 0 0 0 0 0 0 0  
24.7190 -10.8320 -10.0760 O 0 0 0 0 0 0 0 0 0 0 0 0 0 0 0  
24.4770 -6.7460 -10.9250 C 0 0 0 0 0 0 0 0 0 0 0 0 0 0 0  
25.1800 -6.2740 -10.2270 H 0 0 0 0 0 0 0 0 0 0 0 0 0 0 0  
24.9240 -6.6350 -11.9210 H 0 0 0 0 0 0 0 0 0 0 0 0 0 0 0  
19.1850 1.5650 -11.7420 C 0 0 0 0 0 0 0 0 0 0 0 0 0 0 0  
19.5490 1.8550 -12.7360 H 0 0 0 0 0 0 0 0 0 0 0 0 0 0 0  
19.8650 2.0370 -11.0210 H 0 0 0 0 0 0 0 0 0 0 0 0 0 0 0  
19.2510 0.0510 -11.5560 C 0 0 0 0 0 0 0 0 0 0 0 0 0 0 0  
18.8780 -0.2180 -10.5610 H 0 0 0 0 0 0 0 0 0 0 0 0 0 0 0  
18.6520 -0.4630 -12.3160 H 0 0 0 0 0 0 0 0 0 0 0 0 0 0 0  
20.6700 -0.4450 -11.6790 C 0 0 0 0 0 0 0 0 0 0 0 0 0 0 0  
20.7090 -1.7790 -11.3970 O 0 0 0 0 0 0 0 0 0 0 0 0 0 0 0  
22.0160 -2.3680 -11.4830 C 0 0 0 0 0 0 0 0 0 0 0 0 0 0 0  
22.4040 -2.2440 -12.5010 H 0 0 0 0 0 0 0 0 0 0 0 0 0 0 0  
22.6860 -1.8710 -10.7720 H 0 0 0 0 0 0 0 0 0 0 0 0 0 0 0  
21.8960 -3.8500 -11.1450 C 0 0 0 0 0 0 0 0 0 0 0 0 0 0 0  
21.4570 -3.9590 -10.1450 H 0 0 0 0 0 0 0 0 0 0 0 0 0 0 0  
21.1880 -4.3240 -11.8360 H 0 0 0 0 0 0 0 0 0 0 0 0 0 0 0  
21.6350 0.2370 -11.9930 O 0 0 0 0 0 0 0 0 0 0 0 0 0 0 0  
23.2500 -4.5550 -11.2070 C 0 0 0 0 0 0 0 0 0 0 0 0 0 0 0  
23.6770 -4.4420 -12.2120 H 0 0 0 0 0 0 0 0 0 0 0 0 0 0 0  
23.9450 -4.0770 -10.5060 H 0 0 0 0 0 0 0 0 0 0 0 0 0 0 0  
23.1230 -6.0410 -10.8700 C 0 0 0 0 0 0 0 0 0 0 0 0 0 0 0  
22.4310 -6.5190 -11.5740 H 0 0 0 0 0 0 0 0 0 0 0 0 0 0 0  
22.6920 -6.1540 -9.8670 H 0 0 0 0 0 0 0 0 0 0 0 0 0 0 0  
33.0590 -18.5530 -14.7770 O 0 0 0 0 0 0 0 0 0 0 0 0 0 0 0  
33.9830 -18.8120 -14.9320 H 0 0 0 0 0 0 0 0 0 0 0 0 0 0 0









|    |     |   |   |   |   |   |
|----|-----|---|---|---|---|---|
| 15 | 18  | 1 | 0 | 0 | 0 | 0 |
| 18 | 19  | 1 | 0 | 0 | 0 | 0 |
| 18 | 20  | 1 | 0 | 0 | 0 | 0 |
| 18 | 21  | 1 | 0 | 0 | 0 | 0 |
| 21 | 22  | 1 | 0 | 0 | 0 | 0 |
| 21 | 38  | 1 | 0 | 0 | 0 | 0 |
| 23 | 24  | 1 | 0 | 0 | 0 | 0 |
| 23 | 25  | 1 | 0 | 0 | 0 | 0 |
| 23 | 26  | 1 | 0 | 0 | 0 | 0 |
| 23 | 35  | 1 | 0 | 0 | 0 | 0 |
| 26 | 27  | 1 | 0 | 0 | 0 | 0 |
| 27 | 28  | 1 | 0 | 0 | 0 | 0 |
| 27 | 34  | 2 | 0 | 0 | 0 | 0 |
| 28 | 29  | 1 | 0 | 0 | 0 | 0 |
| 28 | 30  | 1 | 0 | 0 | 0 | 0 |
| 28 | 31  | 1 | 0 | 0 | 0 | 0 |
| 31 | 32  | 1 | 0 | 0 | 0 | 0 |
| 31 | 33  | 1 | 0 | 0 | 0 | 0 |
| 31 | 79  | 1 | 0 | 0 | 0 | 0 |
| 35 | 36  | 1 | 0 | 0 | 0 | 0 |
| 35 | 37  | 1 | 0 | 0 | 0 | 0 |
| 35 | 56  | 1 | 0 | 0 | 0 | 0 |
| 38 | 39  | 1 | 0 | 0 | 0 | 0 |
| 38 | 40  | 1 | 0 | 0 | 0 | 0 |
| 38 | 41  | 1 | 0 | 0 | 0 | 0 |
| 41 | 42  | 1 | 0 | 0 | 0 | 0 |
| 41 | 43  | 1 | 0 | 0 | 0 | 0 |
| 41 | 44  | 1 | 0 | 0 | 0 | 0 |
| 44 | 45  | 1 | 0 | 0 | 0 | 0 |
| 44 | 52  | 2 | 0 | 0 | 0 | 0 |
| 45 | 46  | 1 | 0 | 0 | 0 | 0 |
| 46 | 47  | 1 | 0 | 0 | 0 | 0 |
| 46 | 48  | 1 | 0 | 0 | 0 | 0 |
| 46 | 49  | 1 | 0 | 0 | 0 | 0 |
| 49 | 50  | 1 | 0 | 0 | 0 | 0 |
| 49 | 51  | 1 | 0 | 0 | 0 | 0 |
| 49 | 53  | 1 | 0 | 0 | 0 | 0 |
| 53 | 54  | 1 | 0 | 0 | 0 | 0 |
| 53 | 55  | 1 | 0 | 0 | 0 | 0 |
| 53 | 56  | 1 | 0 | 0 | 0 | 0 |
| 56 | 57  | 1 | 0 | 0 | 0 | 0 |
| 56 | 58  | 1 | 0 | 0 | 0 | 0 |
| 59 | 60  | 1 | 0 | 0 | 0 | 0 |
| 59 | 61  | 1 | 0 | 0 | 0 | 0 |
| 61 | 62  | 1 | 0 | 0 | 0 | 0 |
| 61 | 63  | 1 | 0 | 0 | 0 | 0 |
| 61 | 64  | 1 | 0 | 0 | 0 | 0 |
| 64 | 65  | 1 | 0 | 0 | 0 | 0 |
| 64 | 66  | 1 | 0 | 0 | 0 | 0 |
| 64 | 67  | 1 | 0 | 0 | 0 | 0 |
| 67 | 68  | 1 | 0 | 0 | 0 | 0 |
| 67 | 69  | 1 | 0 | 0 | 0 | 0 |
| 67 | 70  | 1 | 0 | 0 | 0 | 0 |
| 70 | 71  | 1 | 0 | 0 | 0 | 0 |
| 70 | 72  | 1 | 0 | 0 | 0 | 0 |
| 70 | 73  | 1 | 0 | 0 | 0 | 0 |
| 73 | 74  | 1 | 0 | 0 | 0 | 0 |
| 73 | 75  | 1 | 0 | 0 | 0 | 0 |
| 73 | 76  | 1 | 0 | 0 | 0 | 0 |
| 76 | 77  | 1 | 0 | 0 | 0 | 0 |
| 76 | 78  | 1 | 0 | 0 | 0 | 0 |
| 76 | 79  | 1 | 0 | 0 | 0 | 0 |
| 79 | 95  | 1 | 0 | 0 | 0 | 0 |
| 80 | 81  | 1 | 0 | 0 | 0 | 0 |
| 80 | 82  | 1 | 0 | 0 | 0 | 0 |
| 80 | 83  | 1 | 0 | 0 | 0 | 0 |
| 80 | 92  | 1 | 0 | 0 | 0 | 0 |
| 83 | 84  | 1 | 0 | 0 | 0 | 0 |
| 84 | 85  | 1 | 0 | 0 | 0 | 0 |
| 84 | 91  | 2 | 0 | 0 | 0 | 0 |
| 85 | 86  | 1 | 0 | 0 | 0 | 0 |
| 85 | 87  | 1 | 0 | 0 | 0 | 0 |
| 85 | 88  | 1 | 0 | 0 | 0 | 0 |
| 88 | 89  | 1 | 0 | 0 | 0 | 0 |
| 88 | 90  | 1 | 0 | 0 | 0 | 0 |
| 88 | 136 | 1 | 0 | 0 | 0 | 0 |
| 92 | 93  | 1 | 0 | 0 | 0 | 0 |
| 92 | 94  | 1 | 0 | 0 | 0 | 0 |
| 92 | 113 | 1 | 0 | 0 | 0 | 0 |
| 95 | 96  | 1 | 0 | 0 | 0 | 0 |
| 95 | 97  | 1 | 0 | 0 | 0 | 0 |

|        |   |   |   |   |   |
|--------|---|---|---|---|---|
| 95 98  | 1 | 0 | 0 | 0 | 0 |
| 98 99  | 1 | 0 | 0 | 0 | 0 |
| 98100  | 1 | 0 | 0 | 0 | 0 |
| 98101  | 1 | 0 | 0 | 0 | 0 |
| 101102 | 1 | 0 | 0 | 0 | 0 |
| 101109 | 2 | 0 | 0 | 0 | 0 |
| 102103 | 1 | 0 | 0 | 0 | 0 |
| 103104 | 1 | 0 | 0 | 0 | 0 |
| 103105 | 1 | 0 | 0 | 0 | 0 |
| 103106 | 1 | 0 | 0 | 0 | 0 |
| 106107 | 1 | 0 | 0 | 0 | 0 |
| 106108 | 1 | 0 | 0 | 0 | 0 |
| 106110 | 1 | 0 | 0 | 0 | 0 |
| 110111 | 1 | 0 | 0 | 0 | 0 |
| 110112 | 1 | 0 | 0 | 0 | 0 |
| 110113 | 1 | 0 | 0 | 0 | 0 |
| 113114 | 1 | 0 | 0 | 0 | 0 |
| 113115 | 1 | 0 | 0 | 0 | 0 |
| 116117 | 1 | 0 | 0 | 0 | 0 |
| 116118 | 1 | 0 | 0 | 0 | 0 |
| 118119 | 1 | 0 | 0 | 0 | 0 |
| 118120 | 1 | 0 | 0 | 0 | 0 |
| 118121 | 1 | 0 | 0 | 0 | 0 |
| 121122 | 1 | 0 | 0 | 0 | 0 |
| 121123 | 1 | 0 | 0 | 0 | 0 |
| 121124 | 1 | 0 | 0 | 0 | 0 |
| 124125 | 1 | 0 | 0 | 0 | 0 |
| 124126 | 1 | 0 | 0 | 0 | 0 |
| 124127 | 1 | 0 | 0 | 0 | 0 |
| 127128 | 1 | 0 | 0 | 0 | 0 |
| 127129 | 1 | 0 | 0 | 0 | 0 |
| 127130 | 1 | 0 | 0 | 0 | 0 |
| 130131 | 1 | 0 | 0 | 0 | 0 |
| 130132 | 1 | 0 | 0 | 0 | 0 |
| 130133 | 1 | 0 | 0 | 0 | 0 |
| 133134 | 1 | 0 | 0 | 0 | 0 |
| 133135 | 1 | 0 | 0 | 0 | 0 |
| 133136 | 1 | 0 | 0 | 0 | 0 |
| 136152 | 1 | 0 | 0 | 0 | 0 |
| 137138 | 1 | 0 | 0 | 0 | 0 |
| 137139 | 1 | 0 | 0 | 0 | 0 |
| 137140 | 1 | 0 | 0 | 0 | 0 |
| 137149 | 1 | 0 | 0 | 0 | 0 |
| 140141 | 1 | 0 | 0 | 0 | 0 |
| 141142 | 1 | 0 | 0 | 0 | 0 |
| 141148 | 2 | 0 | 0 | 0 | 0 |
| 142143 | 1 | 0 | 0 | 0 | 0 |
| 142144 | 1 | 0 | 0 | 0 | 0 |
| 142145 | 1 | 0 | 0 | 0 | 0 |
| 145146 | 1 | 0 | 0 | 0 | 0 |
| 145147 | 1 | 0 | 0 | 0 | 0 |
| 145193 | 1 | 0 | 0 | 0 | 0 |
| 149150 | 1 | 0 | 0 | 0 | 0 |
| 149151 | 1 | 0 | 0 | 0 | 0 |
| 149170 | 1 | 0 | 0 | 0 | 0 |
| 152153 | 1 | 0 | 0 | 0 | 0 |
| 152154 | 1 | 0 | 0 | 0 | 0 |
| 152155 | 1 | 0 | 0 | 0 | 0 |
| 155156 | 1 | 0 | 0 | 0 | 0 |
| 155157 | 1 | 0 | 0 | 0 | 0 |
| 155158 | 1 | 0 | 0 | 0 | 0 |
| 158159 | 1 | 0 | 0 | 0 | 0 |
| 158166 | 2 | 0 | 0 | 0 | 0 |
| 159160 | 1 | 0 | 0 | 0 | 0 |
| 160161 | 1 | 0 | 0 | 0 | 0 |
| 160162 | 1 | 0 | 0 | 0 | 0 |
| 160163 | 1 | 0 | 0 | 0 | 0 |
| 163164 | 1 | 0 | 0 | 0 | 0 |
| 163165 | 1 | 0 | 0 | 0 | 0 |
| 163167 | 1 | 0 | 0 | 0 | 0 |
| 167168 | 1 | 0 | 0 | 0 | 0 |
| 167169 | 1 | 0 | 0 | 0 | 0 |
| 167170 | 1 | 0 | 0 | 0 | 0 |
| 170171 | 1 | 0 | 0 | 0 | 0 |
| 170172 | 1 | 0 | 0 | 0 | 0 |
| 173174 | 1 | 0 | 0 | 0 | 0 |
| 173175 | 1 | 0 | 0 | 0 | 0 |
| 175176 | 1 | 0 | 0 | 0 | 0 |
| 175177 | 1 | 0 | 0 | 0 | 0 |
| 175178 | 1 | 0 | 0 | 0 | 0 |
| 178179 | 1 | 0 | 0 | 0 | 0 |

|        |   |   |   |   |   |
|--------|---|---|---|---|---|
| 178180 | 1 | 0 | 0 | 0 | 0 |
| 178181 | 1 | 0 | 0 | 0 | 0 |
| 181182 | 1 | 0 | 0 | 0 | 0 |
| 181183 | 1 | 0 | 0 | 0 | 0 |
| 181184 | 1 | 0 | 0 | 0 | 0 |
| 184185 | 1 | 0 | 0 | 0 | 0 |
| 184186 | 1 | 0 | 0 | 0 | 0 |
| 184187 | 1 | 0 | 0 | 0 | 0 |
| 187188 | 1 | 0 | 0 | 0 | 0 |
| 187189 | 1 | 0 | 0 | 0 | 0 |
| 187190 | 1 | 0 | 0 | 0 | 0 |
| 190191 | 1 | 0 | 0 | 0 | 0 |
| 190192 | 1 | 0 | 0 | 0 | 0 |
| 190193 | 1 | 0 | 0 | 0 | 0 |
| 193209 | 1 | 0 | 0 | 0 | 0 |
| 194195 | 1 | 0 | 0 | 0 | 0 |
| 194196 | 1 | 0 | 0 | 0 | 0 |
| 194197 | 1 | 0 | 0 | 0 | 0 |
| 194206 | 1 | 0 | 0 | 0 | 0 |
| 197198 | 1 | 0 | 0 | 0 | 0 |
| 198199 | 1 | 0 | 0 | 0 | 0 |
| 198205 | 2 | 0 | 0 | 0 | 0 |
| 199200 | 1 | 0 | 0 | 0 | 0 |
| 199201 | 1 | 0 | 0 | 0 | 0 |
| 199202 | 1 | 0 | 0 | 0 | 0 |
| 202203 | 1 | 0 | 0 | 0 | 0 |
| 202204 | 1 | 0 | 0 | 0 | 0 |
| 202250 | 1 | 0 | 0 | 0 | 0 |
| 206207 | 1 | 0 | 0 | 0 | 0 |
| 206208 | 1 | 0 | 0 | 0 | 0 |
| 206227 | 1 | 0 | 0 | 0 | 0 |
| 209210 | 1 | 0 | 0 | 0 | 0 |
| 209211 | 1 | 0 | 0 | 0 | 0 |
| 209212 | 1 | 0 | 0 | 0 | 0 |
| 212213 | 1 | 0 | 0 | 0 | 0 |
| 212214 | 1 | 0 | 0 | 0 | 0 |
| 212215 | 1 | 0 | 0 | 0 | 0 |
| 215216 | 1 | 0 | 0 | 0 | 0 |
| 215223 | 2 | 0 | 0 | 0 | 0 |
| 216217 | 1 | 0 | 0 | 0 | 0 |
| 217218 | 1 | 0 | 0 | 0 | 0 |
| 217219 | 1 | 0 | 0 | 0 | 0 |
| 217220 | 1 | 0 | 0 | 0 | 0 |
| 220221 | 1 | 0 | 0 | 0 | 0 |
| 220222 | 1 | 0 | 0 | 0 | 0 |
| 220224 | 1 | 0 | 0 | 0 | 0 |
| 224225 | 1 | 0 | 0 | 0 | 0 |
| 224226 | 1 | 0 | 0 | 0 | 0 |
| 224227 | 1 | 0 | 0 | 0 | 0 |
| 227228 | 1 | 0 | 0 | 0 | 0 |
| 227229 | 1 | 0 | 0 | 0 | 0 |
| 230231 | 1 | 0 | 0 | 0 | 0 |
| 230232 | 1 | 0 | 0 | 0 | 0 |
| 232233 | 1 | 0 | 0 | 0 | 0 |
| 232234 | 1 | 0 | 0 | 0 | 0 |
| 232235 | 1 | 0 | 0 | 0 | 0 |
| 235236 | 1 | 0 | 0 | 0 | 0 |
| 235237 | 1 | 0 | 0 | 0 | 0 |
| 235238 | 1 | 0 | 0 | 0 | 0 |
| 238239 | 1 | 0 | 0 | 0 | 0 |
| 238240 | 1 | 0 | 0 | 0 | 0 |
| 238241 | 1 | 0 | 0 | 0 | 0 |
| 241242 | 1 | 0 | 0 | 0 | 0 |
| 241243 | 1 | 0 | 0 | 0 | 0 |
| 241244 | 1 | 0 | 0 | 0 | 0 |
| 244245 | 1 | 0 | 0 | 0 | 0 |
| 244246 | 1 | 0 | 0 | 0 | 0 |
| 244247 | 1 | 0 | 0 | 0 | 0 |
| 247248 | 1 | 0 | 0 | 0 | 0 |
| 247249 | 1 | 0 | 0 | 0 | 0 |
| 247250 | 1 | 0 | 0 | 0 | 0 |
| 250267 | 1 | 0 | 0 | 0 | 0 |
| 251252 | 1 | 0 | 0 | 0 | 0 |
| 251253 | 1 | 0 | 0 | 0 | 0 |
| 251254 | 1 | 0 | 0 | 0 | 0 |
| 251264 | 1 | 0 | 0 | 0 | 0 |
| 254255 | 1 | 0 | 0 | 0 | 0 |
| 255256 | 1 | 0 | 0 | 0 | 0 |
| 255263 | 2 | 0 | 0 | 0 | 0 |
| 256257 | 1 | 0 | 0 | 0 | 0 |
| 256258 | 1 | 0 | 0 | 0 | 0 |

256259 1 0 0 0 0  
259260 1 0 0 0 0  
259261 1 0 0 0 0  
259262 1 0 0 0 0  
264265 1 0 0 0 0  
264266 1 0 0 0 0  
264285 1 0 0 0 0  
267268 1 0 0 0 0  
267269 1 0 0 0 0  
267270 1 0 0 0 0  
270271 1 0 0 0 0  
270272 1 0 0 0 0  
270273 1 0 0 0 0  
273274 1 0 0 0 0  
273281 2 0 0 0 0  
274275 1 0 0 0 0  
275276 1 0 0 0 0  
275277 1 0 0 0 0  
275278 1 0 0 0 0  
278279 1 0 0 0 0  
278280 1 0 0 0 0  
278282 1 0 0 0 0  
282283 1 0 0 0 0  
282284 1 0 0 0 0  
282285 1 0 0 0 0  
285286 1 0 0 0 0  
285287 1 0 0 0 0

M END  
> <NAME>  
E36\_1

\$\$\$\$  
E80\_1  
MOE2012 3D

277276 0 0 1 0 0 0 0 0999 V2000  
10.4040 -22.4610 -3.5140 C 0 0 0 0 0 0 0 0 0 0 0 0 0 0 0  
9.9500 -22.9840 -4.3640 H 0 0 0 0 0 0 0 0 0 0 0 0 0 0 0  
9.7060 -22.5010 -2.6700 H 0 0 0 0 0 0 0 0 0 0 0 0 0 0 0  
11.3030 -23.0270 -3.2470 H 0 0 0 0 0 0 0 0 0 0 0 0 0 0 0  
10.7500 -21.0840 -3.8810 N 0 0 0 0 0 0 0 0 0 0 0 0 0 0 0  
11.4200 -20.4130 -2.7480 C 0 0 0 0 0 0 0 0 0 0 0 0 0 0 0  
10.7270 -20.2940 -1.9050 H 0 0 0 0 0 0 0 0 0 0 0 0 0 0 0  
12.2400 -21.0530 -2.3980 H 0 0 0 0 0 0 0 0 0 0 0 0 0 0 0  
12.0310 -19.0510 -3.1170 C 0 0 0 0 0 0 0 0 0 0 0 0 0 0 0  
12.6920 -19.1680 -3.9850 H 0 0 0 0 0 0 0 0 0 0 0 0 0 0 0  
11.2390 -18.3470 -3.4010 H 0 0 0 0 0 0 0 0 0 0 0 0 0 0 0  
12.8230 -18.4550 -1.9420 C 0 0 0 0 0 0 0 0 0 0 0 0 0 0 0  
12.1610 -18.3650 -1.0730 H 0 0 0 0 0 0 0 0 0 0 0 0 0 0 0  
13.6460 -19.1270 -1.6770 H 0 0 0 0 0 0 0 0 0 0 0 0 0 0 0  
9.5440 -20.3720 -4.3100 C 0 0 0 0 0 0 0 0 0 0 0 0 0 0 0  
8.8240 -20.2490 -3.4940 H 0 0 0 0 0 0 0 0 0 0 0 0 0 0 0  
9.0480 -20.9130 -5.1250 H 0 0 0 0 0 0 0 0 0 0 0 0 0 0 0  
9.7880 -19.3850 -4.7130 H 0 0 0 0 0 0 0 0 0 0 0 0 0 0 0  
13.3340 -17.1370 -2.3190 N 0 0 3 0 0 0 0 0 0 0 0 0 0 0 0  
13.9550 -17.2170 -3.1230 H 0 0 0 0 0 0 0 0 0 0 0 0 0 0 0  
24.1270 -15.9800 3.4040 C 0 0 0 0 0 0 0 0 0 0 0 0 0 0 0  
24.6170 -15.9110 2.4260 H 0 0 0 0 0 0 0 0 0 0 0 0 0 0 0  
24.0710 -17.0310 3.7130 H 0 0 0 0 0 0 0 0 0 0 0 0 0 0 0  
24.8890 -15.2390 4.3700 O 0 0 0 0 0 0 0 0 0 0 0 0 0 0 0  
26.1610 -15.6980 4.5580 C 0 0 0 0 0 0 0 0 0 0 0 0 0 0 0  
26.8570 -14.8430 5.5910 C 0 0 0 0 0 0 0 0 0 0 0 0 0 0 0  
26.8610 -13.8150 5.2130 H 0 0 0 0 0 0 0 0 0 0 0 0 0 0 0  
26.2750 -14.8850 6.5170 H 0 0 0 0 0 0 0 0 0 0 0 0 0 0 0  
28.2900 -15.3320 5.8360 C 0 0 0 0 0 0 0 0 0 0 0 0 0 0 0  
28.2700 -16.3910 6.1310 H 0 0 0 0 0 0 0 0 0 0 0 0 0 0 0  
28.8400 -15.3370 4.8860 H 0 0 0 0 0 0 0 0 0 0 0 0 0 0 0  
26.6580 -16.6500 3.9740 O 0 0 0 0 0 0 0 0 0 0 0 0 0 0 0  
22.7260 -15.3820 3.3330 C 0 0 0 0 0 0 0 0 0 0 0 0 0 0 0  
22.2700 -15.4080 4.3310 H 0 0 0 0 0 0 0 0 0 0 0 0 0 0 0  
22.7980 -14.3210 3.0630 H 0 0 0 0 0 0 0 0 0 0 0 0 0 0 0  
13.9990 -16.4240 -1.2250 C 0 0 0 0 0 0 0 0 0 0 0 0 0 0 0  
14.0590 -15.3690 -1.5200 H 0 0 0 0 0 0 0 0 0 0 0 0 0 0 0  
13.3780 -16.4420 -0.3210 H 0 0 0 0 0 0 0 0 0 0 0 0 0 0 0  
15.4100 -16.9300 -0.9220 C 0 0 0 0 0 0 0 0 0 0 0 0 0 0 0  
15.3760 -17.9490 -0.5230 H 0 0 0 0 0 0 0 0 0 0 0 0 0 0 0  
16.0110 -16.9220 -1.8390 H 0 0 0 0 0 0 0 0 0 0 0 0 0 0 0  
16.1010 -16.0500 0.0970 C 0 0 0 0 0 0 0 0 0 0 0 0 0 0 0  
17.3950 -16.4600 0.2490 O 0 0 0 0 0 0 0 0 0 0 0 0 0 0 0  
18.1550 -15.6970 1.1990 C 0 0 0 0 0 0 0 0 0 0 0 0 0 0 0  
18.1960 -14.6510 0.8760 H 0 0 0 0 0 0 0 0 0 0 0 0 0 0 0









|    |     |   |   |   |   |   |
|----|-----|---|---|---|---|---|
| 9  | 12  | 1 | 0 | 0 | 0 | 0 |
| 12 | 13  | 1 | 0 | 0 | 0 | 0 |
| 12 | 14  | 1 | 0 | 0 | 0 | 0 |
| 12 | 19  | 1 | 0 | 0 | 0 | 0 |
| 15 | 16  | 1 | 0 | 0 | 0 | 0 |
| 15 | 17  | 1 | 0 | 0 | 0 | 0 |
| 15 | 18  | 1 | 0 | 0 | 0 | 0 |
| 19 | 20  | 1 | 0 | 0 | 0 | 0 |
| 19 | 36  | 1 | 0 | 0 | 0 | 0 |
| 21 | 22  | 1 | 0 | 0 | 0 | 0 |
| 21 | 23  | 1 | 0 | 0 | 0 | 0 |
| 21 | 24  | 1 | 0 | 0 | 0 | 0 |
| 21 | 33  | 1 | 0 | 0 | 0 | 0 |
| 24 | 25  | 1 | 0 | 0 | 0 | 0 |
| 25 | 26  | 1 | 0 | 0 | 0 | 0 |
| 25 | 32  | 2 | 0 | 0 | 0 | 0 |
| 26 | 27  | 1 | 0 | 0 | 0 | 0 |
| 26 | 28  | 1 | 0 | 0 | 0 | 0 |
| 26 | 29  | 1 | 0 | 0 | 0 | 0 |
| 29 | 30  | 1 | 0 | 0 | 0 | 0 |
| 29 | 31  | 1 | 0 | 0 | 0 | 0 |
| 29 | 75  | 1 | 0 | 0 | 0 | 0 |
| 33 | 34  | 1 | 0 | 0 | 0 | 0 |
| 33 | 35  | 1 | 0 | 0 | 0 | 0 |
| 33 | 54  | 1 | 0 | 0 | 0 | 0 |
| 36 | 37  | 1 | 0 | 0 | 0 | 0 |
| 36 | 38  | 1 | 0 | 0 | 0 | 0 |
| 36 | 39  | 1 | 0 | 0 | 0 | 0 |
| 39 | 40  | 1 | 0 | 0 | 0 | 0 |
| 39 | 41  | 1 | 0 | 0 | 0 | 0 |
| 39 | 42  | 1 | 0 | 0 | 0 | 0 |
| 42 | 43  | 1 | 0 | 0 | 0 | 0 |
| 42 | 50  | 2 | 0 | 0 | 0 | 0 |
| 43 | 44  | 1 | 0 | 0 | 0 | 0 |
| 44 | 45  | 1 | 0 | 0 | 0 | 0 |
| 44 | 46  | 1 | 0 | 0 | 0 | 0 |
| 44 | 47  | 1 | 0 | 0 | 0 | 0 |
| 47 | 48  | 1 | 0 | 0 | 0 | 0 |
| 47 | 49  | 1 | 0 | 0 | 0 | 0 |
| 47 | 51  | 1 | 0 | 0 | 0 | 0 |
| 51 | 52  | 1 | 0 | 0 | 0 | 0 |
| 51 | 53  | 1 | 0 | 0 | 0 | 0 |
| 51 | 54  | 1 | 0 | 0 | 0 | 0 |
| 54 | 55  | 1 | 0 | 0 | 0 | 0 |
| 54 | 56  | 1 | 0 | 0 | 0 | 0 |
| 57 | 58  | 1 | 0 | 0 | 0 | 0 |
| 57 | 59  | 1 | 0 | 0 | 0 | 0 |
| 57 | 60  | 1 | 0 | 0 | 0 | 0 |
| 57 | 61  | 1 | 0 | 0 | 0 | 0 |
| 61 | 62  | 1 | 0 | 0 | 0 | 0 |
| 61 | 71  | 1 | 0 | 0 | 0 | 0 |
| 62 | 63  | 1 | 0 | 0 | 0 | 0 |
| 62 | 64  | 1 | 0 | 0 | 0 | 0 |
| 62 | 65  | 1 | 0 | 0 | 0 | 0 |
| 65 | 66  | 1 | 0 | 0 | 0 | 0 |
| 65 | 67  | 1 | 0 | 0 | 0 | 0 |
| 65 | 68  | 1 | 0 | 0 | 0 | 0 |
| 68 | 69  | 1 | 0 | 0 | 0 | 0 |
| 68 | 70  | 1 | 0 | 0 | 0 | 0 |
| 68 | 75  | 1 | 0 | 0 | 0 | 0 |
| 71 | 72  | 1 | 0 | 0 | 0 | 0 |
| 71 | 73  | 1 | 0 | 0 | 0 | 0 |
| 71 | 74  | 1 | 0 | 0 | 0 | 0 |
| 75 | 91  | 1 | 0 | 0 | 0 | 0 |
| 76 | 77  | 1 | 0 | 0 | 0 | 0 |
| 76 | 78  | 1 | 0 | 0 | 0 | 0 |
| 76 | 79  | 1 | 0 | 0 | 0 | 0 |
| 76 | 88  | 1 | 0 | 0 | 0 | 0 |
| 79 | 80  | 1 | 0 | 0 | 0 | 0 |
| 80 | 81  | 1 | 0 | 0 | 0 | 0 |
| 80 | 87  | 2 | 0 | 0 | 0 | 0 |
| 81 | 82  | 1 | 0 | 0 | 0 | 0 |
| 81 | 83  | 1 | 0 | 0 | 0 | 0 |
| 81 | 84  | 1 | 0 | 0 | 0 | 0 |
| 84 | 85  | 1 | 0 | 0 | 0 | 0 |
| 84 | 86  | 1 | 0 | 0 | 0 | 0 |
| 84 | 130 | 1 | 0 | 0 | 0 | 0 |
| 88 | 89  | 1 | 0 | 0 | 0 | 0 |
| 88 | 90  | 1 | 0 | 0 | 0 | 0 |
| 88 | 109 | 1 | 0 | 0 | 0 | 0 |
| 91 | 92  | 1 | 0 | 0 | 0 | 0 |

|     |     |   |   |   |   |   |
|-----|-----|---|---|---|---|---|
| 91  | 93  | 1 | 0 | 0 | 0 | 0 |
| 91  | 94  | 1 | 0 | 0 | 0 | 0 |
| 94  | 95  | 1 | 0 | 0 | 0 | 0 |
| 94  | 96  | 1 | 0 | 0 | 0 | 0 |
| 94  | 97  | 1 | 0 | 0 | 0 | 0 |
| 97  | 98  | 1 | 0 | 0 | 0 | 0 |
| 97  | 105 | 2 | 0 | 0 | 0 | 0 |
| 98  | 99  | 1 | 0 | 0 | 0 | 0 |
| 99  | 100 | 1 | 0 | 0 | 0 | 0 |
| 99  | 101 | 1 | 0 | 0 | 0 | 0 |
| 99  | 102 | 1 | 0 | 0 | 0 | 0 |
| 102 | 103 | 1 | 0 | 0 | 0 | 0 |
| 102 | 104 | 1 | 0 | 0 | 0 | 0 |
| 102 | 106 | 1 | 0 | 0 | 0 | 0 |
| 106 | 107 | 1 | 0 | 0 | 0 | 0 |
| 106 | 108 | 1 | 0 | 0 | 0 | 0 |
| 106 | 109 | 1 | 0 | 0 | 0 | 0 |
| 109 | 110 | 1 | 0 | 0 | 0 | 0 |
| 109 | 111 | 1 | 0 | 0 | 0 | 0 |
| 112 | 113 | 1 | 0 | 0 | 0 | 0 |
| 112 | 114 | 1 | 0 | 0 | 0 | 0 |
| 112 | 115 | 1 | 0 | 0 | 0 | 0 |
| 112 | 116 | 1 | 0 | 0 | 0 | 0 |
| 116 | 117 | 1 | 0 | 0 | 0 | 0 |
| 116 | 126 | 1 | 0 | 0 | 0 | 0 |
| 117 | 118 | 1 | 0 | 0 | 0 | 0 |
| 117 | 119 | 1 | 0 | 0 | 0 | 0 |
| 117 | 120 | 1 | 0 | 0 | 0 | 0 |
| 120 | 121 | 1 | 0 | 0 | 0 | 0 |
| 120 | 122 | 1 | 0 | 0 | 0 | 0 |
| 120 | 123 | 1 | 0 | 0 | 0 | 0 |
| 123 | 124 | 1 | 0 | 0 | 0 | 0 |
| 123 | 125 | 1 | 0 | 0 | 0 | 0 |
| 123 | 130 | 1 | 0 | 0 | 0 | 0 |
| 126 | 127 | 1 | 0 | 0 | 0 | 0 |
| 126 | 128 | 1 | 0 | 0 | 0 | 0 |
| 126 | 129 | 1 | 0 | 0 | 0 | 0 |
| 130 | 146 | 1 | 0 | 0 | 0 | 0 |
| 131 | 132 | 1 | 0 | 0 | 0 | 0 |
| 131 | 133 | 1 | 0 | 0 | 0 | 0 |
| 131 | 134 | 1 | 0 | 0 | 0 | 0 |
| 131 | 143 | 1 | 0 | 0 | 0 | 0 |
| 134 | 135 | 1 | 0 | 0 | 0 | 0 |
| 135 | 136 | 1 | 0 | 0 | 0 | 0 |
| 135 | 142 | 2 | 0 | 0 | 0 | 0 |
| 136 | 137 | 1 | 0 | 0 | 0 | 0 |
| 136 | 138 | 1 | 0 | 0 | 0 | 0 |
| 136 | 139 | 1 | 0 | 0 | 0 | 0 |
| 139 | 140 | 1 | 0 | 0 | 0 | 0 |
| 139 | 141 | 1 | 0 | 0 | 0 | 0 |
| 139 | 185 | 1 | 0 | 0 | 0 | 0 |
| 143 | 144 | 1 | 0 | 0 | 0 | 0 |
| 143 | 145 | 1 | 0 | 0 | 0 | 0 |
| 143 | 164 | 1 | 0 | 0 | 0 | 0 |
| 146 | 147 | 1 | 0 | 0 | 0 | 0 |
| 146 | 148 | 1 | 0 | 0 | 0 | 0 |
| 146 | 149 | 1 | 0 | 0 | 0 | 0 |
| 149 | 150 | 1 | 0 | 0 | 0 | 0 |
| 149 | 151 | 1 | 0 | 0 | 0 | 0 |
| 149 | 152 | 1 | 0 | 0 | 0 | 0 |
| 152 | 153 | 1 | 0 | 0 | 0 | 0 |
| 152 | 160 | 2 | 0 | 0 | 0 | 0 |
| 153 | 154 | 1 | 0 | 0 | 0 | 0 |
| 154 | 155 | 1 | 0 | 0 | 0 | 0 |
| 154 | 156 | 1 | 0 | 0 | 0 | 0 |
| 154 | 157 | 1 | 0 | 0 | 0 | 0 |
| 157 | 158 | 1 | 0 | 0 | 0 | 0 |
| 157 | 159 | 1 | 0 | 0 | 0 | 0 |
| 157 | 161 | 1 | 0 | 0 | 0 | 0 |
| 161 | 162 | 1 | 0 | 0 | 0 | 0 |
| 161 | 163 | 1 | 0 | 0 | 0 | 0 |
| 161 | 164 | 1 | 0 | 0 | 0 | 0 |
| 164 | 165 | 1 | 0 | 0 | 0 | 0 |
| 164 | 166 | 1 | 0 | 0 | 0 | 0 |
| 167 | 168 | 1 | 0 | 0 | 0 | 0 |
| 167 | 169 | 1 | 0 | 0 | 0 | 0 |
| 167 | 170 | 1 | 0 | 0 | 0 | 0 |
| 167 | 171 | 1 | 0 | 0 | 0 | 0 |
| 171 | 172 | 1 | 0 | 0 | 0 | 0 |
| 171 | 181 | 1 | 0 | 0 | 0 | 0 |
| 172 | 173 | 1 | 0 | 0 | 0 | 0 |

|        |   |   |   |   |   |
|--------|---|---|---|---|---|
| 172174 | 1 | 0 | 0 | 0 | 0 |
| 172175 | 1 | 0 | 0 | 0 | 0 |
| 175176 | 1 | 0 | 0 | 0 | 0 |
| 175177 | 1 | 0 | 0 | 0 | 0 |
| 175178 | 1 | 0 | 0 | 0 | 0 |
| 178179 | 1 | 0 | 0 | 0 | 0 |
| 178180 | 1 | 0 | 0 | 0 | 0 |
| 178185 | 1 | 0 | 0 | 0 | 0 |
| 181182 | 1 | 0 | 0 | 0 | 0 |
| 181183 | 1 | 0 | 0 | 0 | 0 |
| 181184 | 1 | 0 | 0 | 0 | 0 |
| 185201 | 1 | 0 | 0 | 0 | 0 |
| 186187 | 1 | 0 | 0 | 0 | 0 |
| 186188 | 1 | 0 | 0 | 0 | 0 |
| 186189 | 1 | 0 | 0 | 0 | 0 |
| 186198 | 1 | 0 | 0 | 0 | 0 |
| 189190 | 1 | 0 | 0 | 0 | 0 |
| 190191 | 1 | 0 | 0 | 0 | 0 |
| 190197 | 2 | 0 | 0 | 0 | 0 |
| 191192 | 1 | 0 | 0 | 0 | 0 |
| 191193 | 1 | 0 | 0 | 0 | 0 |
| 191194 | 1 | 0 | 0 | 0 | 0 |
| 194195 | 1 | 0 | 0 | 0 | 0 |
| 194196 | 1 | 0 | 0 | 0 | 0 |
| 194240 | 1 | 0 | 0 | 0 | 0 |
| 198199 | 1 | 0 | 0 | 0 | 0 |
| 198200 | 1 | 0 | 0 | 0 | 0 |
| 198219 | 1 | 0 | 0 | 0 | 0 |
| 201202 | 1 | 0 | 0 | 0 | 0 |
| 201203 | 1 | 0 | 0 | 0 | 0 |
| 201204 | 1 | 0 | 0 | 0 | 0 |
| 204205 | 1 | 0 | 0 | 0 | 0 |
| 204206 | 1 | 0 | 0 | 0 | 0 |
| 204207 | 1 | 0 | 0 | 0 | 0 |
| 207208 | 1 | 0 | 0 | 0 | 0 |
| 207215 | 2 | 0 | 0 | 0 | 0 |
| 208209 | 1 | 0 | 0 | 0 | 0 |
| 209210 | 1 | 0 | 0 | 0 | 0 |
| 209211 | 1 | 0 | 0 | 0 | 0 |
| 209212 | 1 | 0 | 0 | 0 | 0 |
| 212213 | 1 | 0 | 0 | 0 | 0 |
| 212214 | 1 | 0 | 0 | 0 | 0 |
| 212216 | 1 | 0 | 0 | 0 | 0 |
| 216217 | 1 | 0 | 0 | 0 | 0 |
| 216218 | 1 | 0 | 0 | 0 | 0 |
| 216219 | 1 | 0 | 0 | 0 | 0 |
| 219220 | 1 | 0 | 0 | 0 | 0 |
| 219221 | 1 | 0 | 0 | 0 | 0 |
| 222223 | 1 | 0 | 0 | 0 | 0 |
| 222224 | 1 | 0 | 0 | 0 | 0 |
| 222225 | 1 | 0 | 0 | 0 | 0 |
| 222226 | 1 | 0 | 0 | 0 | 0 |
| 226227 | 1 | 0 | 0 | 0 | 0 |
| 226236 | 1 | 0 | 0 | 0 | 0 |
| 227228 | 1 | 0 | 0 | 0 | 0 |
| 227229 | 1 | 0 | 0 | 0 | 0 |
| 227230 | 1 | 0 | 0 | 0 | 0 |
| 230231 | 1 | 0 | 0 | 0 | 0 |
| 230232 | 1 | 0 | 0 | 0 | 0 |
| 230233 | 1 | 0 | 0 | 0 | 0 |
| 233234 | 1 | 0 | 0 | 0 | 0 |
| 233235 | 1 | 0 | 0 | 0 | 0 |
| 233240 | 1 | 0 | 0 | 0 | 0 |
| 236237 | 1 | 0 | 0 | 0 | 0 |
| 236238 | 1 | 0 | 0 | 0 | 0 |
| 236239 | 1 | 0 | 0 | 0 | 0 |
| 240257 | 1 | 0 | 0 | 0 | 0 |
| 241242 | 1 | 0 | 0 | 0 | 0 |
| 241243 | 1 | 0 | 0 | 0 | 0 |
| 241244 | 1 | 0 | 0 | 0 | 0 |
| 241254 | 1 | 0 | 0 | 0 | 0 |
| 244245 | 1 | 0 | 0 | 0 | 0 |
| 245246 | 1 | 0 | 0 | 0 | 0 |
| 245253 | 2 | 0 | 0 | 0 | 0 |
| 246247 | 1 | 0 | 0 | 0 | 0 |
| 246248 | 1 | 0 | 0 | 0 | 0 |
| 246249 | 1 | 0 | 0 | 0 | 0 |
| 249250 | 1 | 0 | 0 | 0 | 0 |
| 249251 | 1 | 0 | 0 | 0 | 0 |
| 249252 | 1 | 0 | 0 | 0 | 0 |
| 254255 | 1 | 0 | 0 | 0 | 0 |

254256 1 0 0 0 0  
254275 1 0 0 0 0  
257258 1 0 0 0 0  
257259 1 0 0 0 0  
257260 1 0 0 0 0  
260261 1 0 0 0 0  
260262 1 0 0 0 0  
260263 1 0 0 0 0  
263264 1 0 0 0 0  
263271 2 0 0 0 0  
264265 1 0 0 0 0  
265266 1 0 0 0 0  
265267 1 0 0 0 0  
265268 1 0 0 0 0  
268269 1 0 0 0 0  
268270 1 0 0 0 0  
268272 1 0 0 0 0  
272273 1 0 0 0 0  
272274 1 0 0 0 0  
272275 1 0 0 0 0  
275276 1 0 0 0 0  
275277 1 0 0 0 0

M END  
> <NAME>  
E80\_1

\$\$\$\$  
E86\_1  
MOE2012 3D

302301 0 0 1 0 0 0 0 0999 V2000  
12.5460 9.9060 15.7060 C 0 0 0 0 0 0 0 0 0 0 0 0 0 0 0  
12.8960 9.2330 16.5010 H 0 0 0 0 0 0 0 0 0 0 0 0 0 0 0  
12.9510 10.8950 15.9610 H 0 0 0 0 0 0 0 0 0 0 0 0 0 0 0  
13.0740 9.4390 14.4060 N 0 0 0 0 0 0 0 0 0 0 0 0 0 0 0  
14.5440 9.2980 14.5050 C 0 0 0 0 0 0 0 0 0 0 0 0 0 0 0  
15.0310 10.2830 14.4840 H 0 0 0 0 0 0 0 0 0 0 0 0 0 0 0  
14.8040 8.8410 15.4700 H 0 0 0 0 0 0 0 0 0 0 0 0 0 0 0  
15.1190 8.3750 13.4110 C 0 0 0 0 0 0 0 0 0 0 0 0 0 0 0  
14.6250 7.4010 13.4940 H 0 0 0 0 0 0 0 0 0 0 0 0 0 0 0  
14.9060 8.7740 12.4130 H 0 0 0 0 0 0 0 0 0 0 0 0 0 0 0  
16.5720 8.2370 13.5820 N 0 0 3 0 0 0 0 0 0 0 0 0 0 0 0  
17.0050 9.1500 13.4340 H 0 0 0 0 0 0 0 0 0 0 0 0 0 0 0  
12.6960 10.3460 13.3030 C 0 0 0 0 0 0 0 0 0 0 0 0 0 0 0  
12.3990 11.3380 13.6680 H 0 0 0 0 0 0 0 0 0 0 0 0 0 0 0  
13.5420 10.5570 12.6360 H 0 0 0 0 0 0 0 0 0 0 0 0 0 0 0  
11.0160 9.9430 15.8110 C 0 0 0 0 0 0 0 0 0 0 0 0 0 0 0  
10.5850 10.6920 15.1400 H 0 0 0 0 0 0 0 0 0 0 0 0 0 0 0  
10.5880 8.9620 15.5790 H 0 0 0 0 0 0 0 0 0 0 0 0 0 0 0  
10.6460 10.2880 17.1430 O 0 0 0 0 0 0 0 0 0 0 0 0 0 0 0  
9.6740 10.2940 17.1770 H 0 0 0 0 0 0 0 0 0 0 0 0 0 0 0  
11.5810 9.7430 12.4430 C 0 0 0 0 0 0 0 0 0 0 0 0 0 0 0  
11.9300 8.8350 11.9390 H 0 0 0 0 0 0 0 0 0 0 0 0 0 0 0  
10.6980 9.4960 13.0380 H 0 0 0 0 0 0 0 0 0 0 0 0 0 0 0  
11.1910 10.6880 11.4510 O 0 0 0 0 0 0 0 0 0 0 0 0 0 0 0  
10.4800 10.2780 10.9280 H 0 0 0 0 0 0 0 0 0 0 0 0 0 0 0  
17.7960 -3.7930 11.5310 C 0 0 0 0 0 0 0 0 0 0 0 0 0 0 0  
16.7400 -3.8620 11.2430 H 0 0 0 0 0 0 0 0 0 0 0 0 0 0 0  
17.8960 -3.9660 12.6080 H 0 0 0 0 0 0 0 0 0 0 0 0 0 0 0  
18.5680 -4.7800 10.8290 O 0 0 0 0 0 0 0 0 0 0 0 0 0 0 0  
18.0550 -6.0400 10.8410 C 0 0 0 0 0 0 0 0 0 0 0 0 0 0 0  
18.9270 -6.9730 10.0410 C 0 0 0 0 0 0 0 0 0 0 0 0 0 0 0  
19.8800 -6.4850 9.8050 H 0 0 0 0 0 0 0 0 0 0 0 0 0 0 0  
19.1820 -7.8160 10.6940 H 0 0 0 0 0 0 0 0 0 0 0 0 0 0 0  
18.1970 -7.4670 8.7870 C 0 0 0 0 0 0 0 0 0 0 0 0 0 0 0  
18.1770 -8.5620 8.8540 H 0 0 0 0 0 0 0 0 0 0 0 0 0 0 0  
17.1480 -7.1450 8.7590 H 0 0 0 0 0 0 0 0 0 0 0 0 0 0 0  
17.0230 -6.3800 11.4050 O 0 0 0 0 0 0 0 0 0 0 0 0 0 0 0  
18.3480 -2.4210 11.1550 C 0 0 0 0 0 0 0 0 0 0 0 0 0 0 0  
19.4200 -2.3860 11.3850 H 0 0 0 0 0 0 0 0 0 0 0 0 0 0 0  
18.2710 -2.2900 10.0680 H 0 0 0 0 0 0 0 0 0 0 0 0 0 0 0  
17.1650 7.2790 12.6450 C 0 0 0 0 0 0 0 0 0 0 0 0 0 0 0  
16.8380 7.4820 11.6180 H 0 0 0 0 0 0 0 0 0 0 0 0 0 0 0  
18.2510 7.4370 12.6570 H 0 0 0 0 0 0 0 0 0 0 0 0 0 0 0  
16.8780 5.8310 13.0390 C 0 0 0 0 0 0 0 0 0 0 0 0 0 0 0  
17.2030 5.6510 14.0710 H 0 0 0 0 0 0 0 0 0 0 0 0 0 0 0  
15.8090 5.6110 12.9560 H 0 0 0 0 0 0 0 0 0 0 0 0 0 0 0  
17.6140 4.8690 12.1440 C 0 0 0 0 0 0 0 0 0 0 0 0 0 0 0  
17.3050 3.5900 12.5070 O 0 0 0 0 0 0 0 0 0 0 0 0 0 0 0  
17.9610 2.5770 11.7320 C 0 0 0 0 0 0 0 0 0 0 0 0 0 0 0  
17.7300 2.7190 10.6690 H 0 0 0 0 0 0 0 0 0 0 0 0 0 0 0







|         |          |         |   |   |   |   |   |   |   |   |   |   |   |   |   |
|---------|----------|---------|---|---|---|---|---|---|---|---|---|---|---|---|---|
| 56.6780 | -21.2670 | 10.2800 | H | 0 | 0 | 0 | 0 | 0 | 0 | 0 | 0 | 0 | 0 | 0 | 0 |
| 56.4410 | -20.6650 | 11.9080 | H | 0 | 0 | 0 | 0 | 0 | 0 | 0 | 0 | 0 | 0 | 0 | 0 |
| 52.1020 | -21.3890 | 10.5960 | O | 0 | 0 | 0 | 0 | 0 | 0 | 0 | 0 | 0 | 0 | 0 | 0 |
| 56.8720 | -22.7870 | 11.8140 | C | 0 | 0 | 0 | 0 | 0 | 0 | 0 | 0 | 0 | 0 | 0 | 0 |
| 56.4230 | -23.0240 | 12.7860 | H | 0 | 0 | 0 | 0 | 0 | 0 | 0 | 0 | 0 | 0 | 0 | 0 |
| 56.6610 | -23.6320 | 11.1460 | H | 0 | 0 | 0 | 0 | 0 | 0 | 0 | 0 | 0 | 0 | 0 | 0 |
| 58.3850 | -22.6280 | 11.9740 | C | 0 | 0 | 0 | 0 | 0 | 0 | 0 | 0 | 0 | 0 | 0 | 0 |
| 58.5970 | -21.7850 | 12.6420 | H | 0 | 0 | 0 | 0 | 0 | 0 | 0 | 0 | 0 | 0 | 0 | 0 |
| 58.8330 | -22.3900 | 11.0010 | H | 0 | 0 | 0 | 0 | 0 | 0 | 0 | 0 | 0 | 0 | 0 | 0 |
| 1       | 2        | 1       | 0 | 0 | 0 | 0 | 0 | 0 | 0 | 0 | 0 | 0 | 0 | 0 | 0 |
| 1       | 3        | 1       | 0 | 0 | 0 | 0 | 0 | 0 | 0 | 0 | 0 | 0 | 0 | 0 | 0 |
| 1       | 4        | 1       | 0 | 0 | 0 | 0 | 0 | 0 | 0 | 0 | 0 | 0 | 0 | 0 | 0 |
| 1       | 16       | 1       | 0 | 0 | 0 | 0 | 0 | 0 | 0 | 0 | 0 | 0 | 0 | 0 | 0 |
| 4       | 5        | 1       | 0 | 0 | 0 | 0 | 0 | 0 | 0 | 0 | 0 | 0 | 0 | 0 | 0 |
| 4       | 13       | 1       | 0 | 0 | 0 | 0 | 0 | 0 | 0 | 0 | 0 | 0 | 0 | 0 | 0 |
| 5       | 6        | 1       | 0 | 0 | 0 | 0 | 0 | 0 | 0 | 0 | 0 | 0 | 0 | 0 | 0 |
| 5       | 7        | 1       | 0 | 0 | 0 | 0 | 0 | 0 | 0 | 0 | 0 | 0 | 0 | 0 | 0 |
| 5       | 8        | 1       | 0 | 0 | 0 | 0 | 0 | 0 | 0 | 0 | 0 | 0 | 0 | 0 | 0 |
| 8       | 9        | 1       | 0 | 0 | 0 | 0 | 0 | 0 | 0 | 0 | 0 | 0 | 0 | 0 | 0 |
| 8       | 10       | 1       | 0 | 0 | 0 | 0 | 0 | 0 | 0 | 0 | 0 | 0 | 0 | 0 | 0 |
| 8       | 11       | 1       | 0 | 0 | 0 | 0 | 0 | 0 | 0 | 0 | 0 | 0 | 0 | 0 | 0 |
| 11      | 12       | 1       | 0 | 0 | 0 | 0 | 0 | 0 | 0 | 0 | 0 | 0 | 0 | 0 | 0 |
| 11      | 41       | 1       | 0 | 0 | 0 | 0 | 0 | 0 | 0 | 0 | 0 | 0 | 0 | 0 | 0 |
| 13      | 14       | 1       | 0 | 0 | 0 | 0 | 0 | 0 | 0 | 0 | 0 | 0 | 0 | 0 | 0 |
| 13      | 15       | 1       | 0 | 0 | 0 | 0 | 0 | 0 | 0 | 0 | 0 | 0 | 0 | 0 | 0 |
| 13      | 21       | 1       | 0 | 0 | 0 | 0 | 0 | 0 | 0 | 0 | 0 | 0 | 0 | 0 | 0 |
| 16      | 17       | 1       | 0 | 0 | 0 | 0 | 0 | 0 | 0 | 0 | 0 | 0 | 0 | 0 | 0 |
| 16      | 18       | 1       | 0 | 0 | 0 | 0 | 0 | 0 | 0 | 0 | 0 | 0 | 0 | 0 | 0 |
| 16      | 19       | 1       | 0 | 0 | 0 | 0 | 0 | 0 | 0 | 0 | 0 | 0 | 0 | 0 | 0 |
| 19      | 20       | 1       | 0 | 0 | 0 | 0 | 0 | 0 | 0 | 0 | 0 | 0 | 0 | 0 | 0 |
| 21      | 22       | 1       | 0 | 0 | 0 | 0 | 0 | 0 | 0 | 0 | 0 | 0 | 0 | 0 | 0 |
| 21      | 23       | 1       | 0 | 0 | 0 | 0 | 0 | 0 | 0 | 0 | 0 | 0 | 0 | 0 | 0 |
| 21      | 24       | 1       | 0 | 0 | 0 | 0 | 0 | 0 | 0 | 0 | 0 | 0 | 0 | 0 | 0 |
| 24      | 25       | 1       | 0 | 0 | 0 | 0 | 0 | 0 | 0 | 0 | 0 | 0 | 0 | 0 | 0 |
| 26      | 27       | 1       | 0 | 0 | 0 | 0 | 0 | 0 | 0 | 0 | 0 | 0 | 0 | 0 | 0 |
| 26      | 28       | 1       | 0 | 0 | 0 | 0 | 0 | 0 | 0 | 0 | 0 | 0 | 0 | 0 | 0 |
| 26      | 29       | 1       | 0 | 0 | 0 | 0 | 0 | 0 | 0 | 0 | 0 | 0 | 0 | 0 | 0 |
| 26      | 38       | 1       | 0 | 0 | 0 | 0 | 0 | 0 | 0 | 0 | 0 | 0 | 0 | 0 | 0 |
| 29      | 30       | 1       | 0 | 0 | 0 | 0 | 0 | 0 | 0 | 0 | 0 | 0 | 0 | 0 | 0 |
| 30      | 31       | 1       | 0 | 0 | 0 | 0 | 0 | 0 | 0 | 0 | 0 | 0 | 0 | 0 | 0 |
| 30      | 37       | 2       | 0 | 0 | 0 | 0 | 0 | 0 | 0 | 0 | 0 | 0 | 0 | 0 | 0 |
| 31      | 32       | 1       | 0 | 0 | 0 | 0 | 0 | 0 | 0 | 0 | 0 | 0 | 0 | 0 | 0 |
| 31      | 33       | 1       | 0 | 0 | 0 | 0 | 0 | 0 | 0 | 0 | 0 | 0 | 0 | 0 | 0 |
| 31      | 34       | 1       | 0 | 0 | 0 | 0 | 0 | 0 | 0 | 0 | 0 | 0 | 0 | 0 | 0 |
| 34      | 35       | 1       | 0 | 0 | 0 | 0 | 0 | 0 | 0 | 0 | 0 | 0 | 0 | 0 | 0 |
| 34      | 36       | 1       | 0 | 0 | 0 | 0 | 0 | 0 | 0 | 0 | 0 | 0 | 0 | 0 | 0 |
| 34      | 72       | 1       | 0 | 0 | 0 | 0 | 0 | 0 | 0 | 0 | 0 | 0 | 0 | 0 | 0 |
| 38      | 39       | 1       | 0 | 0 | 0 | 0 | 0 | 0 | 0 | 0 | 0 | 0 | 0 | 0 | 0 |
| 38      | 40       | 1       | 0 | 0 | 0 | 0 | 0 | 0 | 0 | 0 | 0 | 0 | 0 | 0 | 0 |
| 38      | 59       | 1       | 0 | 0 | 0 | 0 | 0 | 0 | 0 | 0 | 0 | 0 | 0 | 0 | 0 |
| 41      | 42       | 1       | 0 | 0 | 0 | 0 | 0 | 0 | 0 | 0 | 0 | 0 | 0 | 0 | 0 |
| 41      | 43       | 1       | 0 | 0 | 0 | 0 | 0 | 0 | 0 | 0 | 0 | 0 | 0 | 0 | 0 |
| 41      | 44       | 1       | 0 | 0 | 0 | 0 | 0 | 0 | 0 | 0 | 0 | 0 | 0 | 0 | 0 |
| 44      | 45       | 1       | 0 | 0 | 0 | 0 | 0 | 0 | 0 | 0 | 0 | 0 | 0 | 0 | 0 |
| 44      | 46       | 1       | 0 | 0 | 0 | 0 | 0 | 0 | 0 | 0 | 0 | 0 | 0 | 0 | 0 |
| 44      | 47       | 1       | 0 | 0 | 0 | 0 | 0 | 0 | 0 | 0 | 0 | 0 | 0 | 0 | 0 |
| 47      | 48       | 1       | 0 | 0 | 0 | 0 | 0 | 0 | 0 | 0 | 0 | 0 | 0 | 0 | 0 |
| 47      | 55       | 2       | 0 | 0 | 0 | 0 | 0 | 0 | 0 | 0 | 0 | 0 | 0 | 0 | 0 |
| 48      | 49       | 1       | 0 | 0 | 0 | 0 | 0 | 0 | 0 | 0 | 0 | 0 | 0 | 0 | 0 |
| 49      | 50       | 1       | 0 | 0 | 0 | 0 | 0 | 0 | 0 | 0 | 0 | 0 | 0 | 0 | 0 |
| 49      | 51       | 1       | 0 | 0 | 0 | 0 | 0 | 0 | 0 | 0 | 0 | 0 | 0 | 0 | 0 |
| 49      | 52       | 1       | 0 | 0 | 0 | 0 | 0 | 0 | 0 | 0 | 0 | 0 | 0 | 0 | 0 |
| 52      | 53       | 1       | 0 | 0 | 0 | 0 | 0 | 0 | 0 | 0 | 0 | 0 | 0 | 0 | 0 |
| 52      | 54       | 1       | 0 | 0 | 0 | 0 | 0 | 0 | 0 | 0 | 0 | 0 | 0 | 0 | 0 |
| 52      | 56       | 1       | 0 | 0 | 0 | 0 | 0 | 0 | 0 | 0 | 0 | 0 | 0 | 0 | 0 |
| 56      | 57       | 1       | 0 | 0 | 0 | 0 | 0 | 0 | 0 | 0 | 0 | 0 | 0 | 0 | 0 |
| 56      | 58       | 1       | 0 | 0 | 0 | 0 | 0 | 0 | 0 | 0 | 0 | 0 | 0 | 0 | 0 |
| 56      | 59       | 1       | 0 | 0 | 0 | 0 | 0 | 0 | 0 | 0 | 0 | 0 | 0 | 0 | 0 |
| 59      | 60       | 1       | 0 | 0 | 0 | 0 | 0 | 0 | 0 | 0 | 0 | 0 | 0 | 0 | 0 |
| 59      | 61       | 1       | 0 | 0 | 0 | 0 | 0 | 0 | 0 | 0 | 0 | 0 | 0 | 0 | 0 |
| 62      | 63       | 1       | 0 | 0 | 0 | 0 | 0 | 0 | 0 | 0 | 0 | 0 | 0 | 0 | 0 |
| 62      | 64       | 1       | 0 | 0 | 0 | 0 | 0 | 0 | 0 | 0 | 0 | 0 | 0 | 0 | 0 |
| 62      | 65       | 1       | 0 | 0 | 0 | 0 | 0 | 0 | 0 | 0 | 0 | 0 | 0 | 0 | 0 |
| 62      | 76       | 1       | 0 | 0 | 0 | 0 | 0 | 0 | 0 | 0 | 0 | 0 | 0 | 0 | 0 |
| 65      | 66       | 1       | 0 | 0 | 0 | 0 | 0 | 0 | 0 | 0 | 0 | 0 | 0 | 0 | 0 |
| 65      | 73       | 1       | 0 | 0 | 0 | 0 | 0 | 0 | 0 | 0 | 0 | 0 | 0 | 0 | 0 |
| 66      | 67       | 1       | 0 | 0 | 0 | 0 | 0 | 0 | 0 | 0 | 0 | 0 | 0 | 0 | 0 |
| 66      | 68       | 1       | 0 | 0 | 0 | 0 | 0 | 0 | 0 | 0 | 0 | 0 | 0 | 0 | 0 |
| 66      | 69       | 1       | 0 | 0 | 0 | 0 | 0 | 0 | 0 | 0 | 0 | 0 | 0 | 0 | 0 |
| 69      | 70       | 1       | 0 | 0 | 0 | 0 | 0 | 0 | 0 | 0 | 0 | 0 | 0 | 0 | 0 |
| 69      | 71       | 1       | 0 | 0 | 0 | 0 | 0 | 0 | 0 | 0 | 0 | 0 | 0 | 0 | 0 |



|     |     |   |   |   |   |   |
|-----|-----|---|---|---|---|---|
| 69  | 72  | 1 | 0 | 0 | 0 | 0 |
| 72  | 101 | 1 | 0 | 0 | 0 | 0 |
| 73  | 74  | 1 | 0 | 0 | 0 | 0 |
| 73  | 75  | 1 | 0 | 0 | 0 | 0 |
| 73  | 81  | 1 | 0 | 0 | 0 | 0 |
| 76  | 77  | 1 | 0 | 0 | 0 | 0 |
| 76  | 78  | 1 | 0 | 0 | 0 | 0 |
| 76  | 79  | 1 | 0 | 0 | 0 | 0 |
| 79  | 80  | 1 | 0 | 0 | 0 | 0 |
| 81  | 82  | 1 | 0 | 0 | 0 | 0 |
| 81  | 83  | 1 | 0 | 0 | 0 | 0 |
| 81  | 84  | 1 | 0 | 0 | 0 | 0 |
| 84  | 85  | 1 | 0 | 0 | 0 | 0 |
| 86  | 87  | 1 | 0 | 0 | 0 | 0 |
| 86  | 88  | 1 | 0 | 0 | 0 | 0 |
| 86  | 89  | 1 | 0 | 0 | 0 | 0 |
| 86  | 98  | 1 | 0 | 0 | 0 | 0 |
| 89  | 90  | 1 | 0 | 0 | 0 | 0 |
| 90  | 91  | 1 | 0 | 0 | 0 | 0 |
| 90  | 97  | 2 | 0 | 0 | 0 | 0 |
| 91  | 92  | 1 | 0 | 0 | 0 | 0 |
| 91  | 93  | 1 | 0 | 0 | 0 | 0 |
| 91  | 94  | 1 | 0 | 0 | 0 | 0 |
| 94  | 95  | 1 | 0 | 0 | 0 | 0 |
| 94  | 96  | 1 | 0 | 0 | 0 | 0 |
| 94  | 132 | 1 | 0 | 0 | 0 | 0 |
| 98  | 99  | 1 | 0 | 0 | 0 | 0 |
| 98  | 100 | 1 | 0 | 0 | 0 | 0 |
| 98  | 119 | 1 | 0 | 0 | 0 | 0 |
| 101 | 102 | 1 | 0 | 0 | 0 | 0 |
| 101 | 103 | 1 | 0 | 0 | 0 | 0 |
| 101 | 104 | 1 | 0 | 0 | 0 | 0 |
| 104 | 105 | 1 | 0 | 0 | 0 | 0 |
| 104 | 106 | 1 | 0 | 0 | 0 | 0 |
| 104 | 107 | 1 | 0 | 0 | 0 | 0 |
| 107 | 108 | 1 | 0 | 0 | 0 | 0 |
| 107 | 115 | 2 | 0 | 0 | 0 | 0 |
| 108 | 109 | 1 | 0 | 0 | 0 | 0 |
| 109 | 110 | 1 | 0 | 0 | 0 | 0 |
| 109 | 111 | 1 | 0 | 0 | 0 | 0 |
| 109 | 112 | 1 | 0 | 0 | 0 | 0 |
| 112 | 113 | 1 | 0 | 0 | 0 | 0 |
| 112 | 114 | 1 | 0 | 0 | 0 | 0 |
| 112 | 116 | 1 | 0 | 0 | 0 | 0 |
| 116 | 117 | 1 | 0 | 0 | 0 | 0 |
| 116 | 118 | 1 | 0 | 0 | 0 | 0 |
| 116 | 119 | 1 | 0 | 0 | 0 | 0 |
| 119 | 120 | 1 | 0 | 0 | 0 | 0 |
| 119 | 121 | 1 | 0 | 0 | 0 | 0 |
| 122 | 123 | 1 | 0 | 0 | 0 | 0 |
| 122 | 124 | 1 | 0 | 0 | 0 | 0 |
| 122 | 125 | 1 | 0 | 0 | 0 | 0 |
| 122 | 136 | 1 | 0 | 0 | 0 | 0 |
| 125 | 126 | 1 | 0 | 0 | 0 | 0 |
| 125 | 133 | 1 | 0 | 0 | 0 | 0 |
| 126 | 127 | 1 | 0 | 0 | 0 | 0 |
| 126 | 128 | 1 | 0 | 0 | 0 | 0 |
| 126 | 129 | 1 | 0 | 0 | 0 | 0 |
| 129 | 130 | 1 | 0 | 0 | 0 | 0 |
| 129 | 131 | 1 | 0 | 0 | 0 | 0 |
| 129 | 132 | 1 | 0 | 0 | 0 | 0 |
| 132 | 161 | 1 | 0 | 0 | 0 | 0 |
| 133 | 134 | 1 | 0 | 0 | 0 | 0 |
| 133 | 135 | 1 | 0 | 0 | 0 | 0 |
| 133 | 141 | 1 | 0 | 0 | 0 | 0 |
| 136 | 137 | 1 | 0 | 0 | 0 | 0 |
| 136 | 138 | 1 | 0 | 0 | 0 | 0 |
| 136 | 139 | 1 | 0 | 0 | 0 | 0 |
| 139 | 140 | 1 | 0 | 0 | 0 | 0 |
| 141 | 142 | 1 | 0 | 0 | 0 | 0 |
| 141 | 143 | 1 | 0 | 0 | 0 | 0 |
| 141 | 144 | 1 | 0 | 0 | 0 | 0 |
| 144 | 145 | 1 | 0 | 0 | 0 | 0 |
| 146 | 147 | 1 | 0 | 0 | 0 | 0 |
| 146 | 148 | 1 | 0 | 0 | 0 | 0 |
| 146 | 149 | 1 | 0 | 0 | 0 | 0 |
| 146 | 158 | 1 | 0 | 0 | 0 | 0 |
| 149 | 150 | 1 | 0 | 0 | 0 | 0 |
| 150 | 151 | 1 | 0 | 0 | 0 | 0 |
| 150 | 157 | 2 | 0 | 0 | 0 | 0 |
| 151 | 152 | 1 | 0 | 0 | 0 | 0 |

|        |   |   |   |   |   |
|--------|---|---|---|---|---|
| 151153 | 1 | 0 | 0 | 0 | 0 |
| 151154 | 1 | 0 | 0 | 0 | 0 |
| 154155 | 1 | 0 | 0 | 0 | 0 |
| 154156 | 1 | 0 | 0 | 0 | 0 |
| 154192 | 1 | 0 | 0 | 0 | 0 |
| 158159 | 1 | 0 | 0 | 0 | 0 |
| 158160 | 1 | 0 | 0 | 0 | 0 |
| 158179 | 1 | 0 | 0 | 0 | 0 |
| 161162 | 1 | 0 | 0 | 0 | 0 |
| 161163 | 1 | 0 | 0 | 0 | 0 |
| 161164 | 1 | 0 | 0 | 0 | 0 |
| 164165 | 1 | 0 | 0 | 0 | 0 |
| 164166 | 1 | 0 | 0 | 0 | 0 |
| 164167 | 1 | 0 | 0 | 0 | 0 |
| 167168 | 1 | 0 | 0 | 0 | 0 |
| 167175 | 2 | 0 | 0 | 0 | 0 |
| 168169 | 1 | 0 | 0 | 0 | 0 |
| 169170 | 1 | 0 | 0 | 0 | 0 |
| 169171 | 1 | 0 | 0 | 0 | 0 |
| 169172 | 1 | 0 | 0 | 0 | 0 |
| 172173 | 1 | 0 | 0 | 0 | 0 |
| 172174 | 1 | 0 | 0 | 0 | 0 |
| 172176 | 1 | 0 | 0 | 0 | 0 |
| 176177 | 1 | 0 | 0 | 0 | 0 |
| 176178 | 1 | 0 | 0 | 0 | 0 |
| 176179 | 1 | 0 | 0 | 0 | 0 |
| 179180 | 1 | 0 | 0 | 0 | 0 |
| 179181 | 1 | 0 | 0 | 0 | 0 |
| 182183 | 1 | 0 | 0 | 0 | 0 |
| 182184 | 1 | 0 | 0 | 0 | 0 |
| 182185 | 1 | 0 | 0 | 0 | 0 |
| 182196 | 1 | 0 | 0 | 0 | 0 |
| 185186 | 1 | 0 | 0 | 0 | 0 |
| 185193 | 1 | 0 | 0 | 0 | 0 |
| 186187 | 1 | 0 | 0 | 0 | 0 |
| 186188 | 1 | 0 | 0 | 0 | 0 |
| 186189 | 1 | 0 | 0 | 0 | 0 |
| 189190 | 1 | 0 | 0 | 0 | 0 |
| 189191 | 1 | 0 | 0 | 0 | 0 |
| 189192 | 1 | 0 | 0 | 0 | 0 |
| 192221 | 1 | 0 | 0 | 0 | 0 |
| 193194 | 1 | 0 | 0 | 0 | 0 |
| 193195 | 1 | 0 | 0 | 0 | 0 |
| 193201 | 1 | 0 | 0 | 0 | 0 |
| 196197 | 1 | 0 | 0 | 0 | 0 |
| 196198 | 1 | 0 | 0 | 0 | 0 |
| 196199 | 1 | 0 | 0 | 0 | 0 |
| 199200 | 1 | 0 | 0 | 0 | 0 |
| 201202 | 1 | 0 | 0 | 0 | 0 |
| 201203 | 1 | 0 | 0 | 0 | 0 |
| 201204 | 1 | 0 | 0 | 0 | 0 |
| 204205 | 1 | 0 | 0 | 0 | 0 |
| 206207 | 1 | 0 | 0 | 0 | 0 |
| 206208 | 1 | 0 | 0 | 0 | 0 |
| 206209 | 1 | 0 | 0 | 0 | 0 |
| 206218 | 1 | 0 | 0 | 0 | 0 |
| 209210 | 1 | 0 | 0 | 0 | 0 |
| 210211 | 1 | 0 | 0 | 0 | 0 |
| 210217 | 2 | 0 | 0 | 0 | 0 |
| 211212 | 1 | 0 | 0 | 0 | 0 |
| 211213 | 1 | 0 | 0 | 0 | 0 |
| 211214 | 1 | 0 | 0 | 0 | 0 |
| 214215 | 1 | 0 | 0 | 0 | 0 |
| 214216 | 1 | 0 | 0 | 0 | 0 |
| 214252 | 1 | 0 | 0 | 0 | 0 |
| 218219 | 1 | 0 | 0 | 0 | 0 |
| 218220 | 1 | 0 | 0 | 0 | 0 |
| 218239 | 1 | 0 | 0 | 0 | 0 |
| 221222 | 1 | 0 | 0 | 0 | 0 |
| 221223 | 1 | 0 | 0 | 0 | 0 |
| 221224 | 1 | 0 | 0 | 0 | 0 |
| 224225 | 1 | 0 | 0 | 0 | 0 |
| 224226 | 1 | 0 | 0 | 0 | 0 |
| 224227 | 1 | 0 | 0 | 0 | 0 |
| 227228 | 1 | 0 | 0 | 0 | 0 |
| 227235 | 2 | 0 | 0 | 0 | 0 |
| 228229 | 1 | 0 | 0 | 0 | 0 |
| 229230 | 1 | 0 | 0 | 0 | 0 |
| 229231 | 1 | 0 | 0 | 0 | 0 |
| 229232 | 1 | 0 | 0 | 0 | 0 |
| 232233 | 1 | 0 | 0 | 0 | 0 |

```

232234 1 0 0 0 0
232236 1 0 0 0 0
236237 1 0 0 0 0
236238 1 0 0 0 0
236239 1 0 0 0 0
239240 1 0 0 0 0
239241 1 0 0 0 0
242243 1 0 0 0 0
242244 1 0 0 0 0
242245 1 0 0 0 0
242256 1 0 0 0 0
245246 1 0 0 0 0
245253 1 0 0 0 0
246247 1 0 0 0 0
246248 1 0 0 0 0
246249 1 0 0 0 0
249250 1 0 0 0 0
249251 1 0 0 0 0
249252 1 0 0 0 0
252282 1 0 0 0 0
253254 1 0 0 0 0
253255 1 0 0 0 0
253261 1 0 0 0 0
256257 1 0 0 0 0
256258 1 0 0 0 0
256259 1 0 0 0 0
259260 1 0 0 0 0
261262 1 0 0 0 0
261263 1 0 0 0 0
261264 1 0 0 0 0
264265 1 0 0 0 0
266267 1 0 0 0 0
266268 1 0 0 0 0
266269 1 0 0 0 0
266279 1 0 0 0 0
269270 1 0 0 0 0
270271 1 0 0 0 0
270278 2 0 0 0 0
271272 1 0 0 0 0
271273 1 0 0 0 0
271274 1 0 0 0 0
274275 1 0 0 0 0
274276 1 0 0 0 0
274277 1 0 0 0 0
279280 1 0 0 0 0
279281 1 0 0 0 0
279300 1 0 0 0 0
282283 1 0 0 0 0
282284 1 0 0 0 0
282285 1 0 0 0 0
285286 1 0 0 0 0
285287 1 0 0 0 0
285288 1 0 0 0 0
288289 1 0 0 0 0
288296 2 0 0 0 0
289290 1 0 0 0 0
290291 1 0 0 0 0
290292 1 0 0 0 0
290293 1 0 0 0 0
293294 1 0 0 0 0
293295 1 0 0 0 0
293297 1 0 0 0 0
297298 1 0 0 0 0
297299 1 0 0 0 0
297300 1 0 0 0 0
300301 1 0 0 0 0
300302 1 0 0 0 0

```

```

M END
> <NAME>
E86_1

```

```

$$$$
F28_1
MOE2012 3D

```

```

242241 0 0 1 0 0 0 0 0 0999 V2000
23.8490 -2.0170 -8.3030 O 0 0 0 0 0 0 0 0 0 0 0 0 0 0 0
23.2900 -1.4600 -8.8710 H 0 0 0 0 0 0 0 0 0 0 0 0 0 0 0
23.0260 -3.0630 -7.8070 C 0 0 0 0 0 0 0 0 0 0 0 0 0 0 0
22.1920 -2.6190 -7.2540 H 0 0 0 0 0 0 0 0 0 0 0 0 0 0 0
22.6310 -3.6260 -8.6580 H 0 0 0 0 0 0 0 0 0 0 0 0 0 0 0

```





|         |          |         |   |   |   |   |   |   |   |   |   |   |   |   |
|---------|----------|---------|---|---|---|---|---|---|---|---|---|---|---|---|
| 42.4580 | -11.9920 | 5.4920  | O | 0 | 0 | 0 | 0 | 0 | 0 | 0 | 0 | 0 | 0 | 0 |
| 43.3610 | -11.8530 | 6.6060  | C | 0 | 0 | 0 | 0 | 0 | 0 | 0 | 0 | 0 | 0 | 0 |
| 43.2930 | -10.8530 | 7.0520  | H | 0 | 0 | 0 | 0 | 0 | 0 | 0 | 0 | 0 | 0 | 0 |
| 43.0040 | -12.5510 | 7.3730  | H | 0 | 0 | 0 | 0 | 0 | 0 | 0 | 0 | 0 | 0 | 0 |
| 44.8230 | -12.1950 | 6.2270  | C | 0 | 0 | 0 | 0 | 0 | 0 | 0 | 0 | 0 | 0 | 0 |
| 45.6860 | -12.0950 | 7.5090  | C | 0 | 0 | 0 | 0 | 0 | 0 | 0 | 0 | 0 | 0 | 0 |
| 45.6160 | -11.0840 | 7.9300  | H | 0 | 0 | 0 | 0 | 0 | 0 | 0 | 0 | 0 | 0 | 0 |
| 45.3280 | -12.8130 | 8.2570  | H | 0 | 0 | 0 | 0 | 0 | 0 | 0 | 0 | 0 | 0 | 0 |
| 47.0660 | -12.3710 | 7.2140  | O | 0 | 0 | 0 | 0 | 0 | 0 | 0 | 0 | 0 | 0 | 0 |
| 47.8950 | -12.3770 | 8.2970  | C | 0 | 0 | 0 | 0 | 0 | 0 | 0 | 0 | 0 | 0 | 0 |
| 49.3110 | -12.6640 | 7.8600  | C | 0 | 0 | 0 | 0 | 0 | 0 | 0 | 0 | 0 | 0 | 0 |
| 49.4340 | -13.7510 | 7.8270  | H | 0 | 0 | 0 | 0 | 0 | 0 | 0 | 0 | 0 | 0 | 0 |
| 49.4550 | -12.2600 | 6.8500  | H | 0 | 0 | 0 | 0 | 0 | 0 | 0 | 0 | 0 | 0 | 0 |
| 50.3080 | -12.0040 | 8.8160  | C | 0 | 0 | 0 | 0 | 0 | 0 | 0 | 0 | 0 | 0 | 0 |
| 50.2270 | -12.4390 | 9.8190  | H | 0 | 0 | 0 | 0 | 0 | 0 | 0 | 0 | 0 | 0 | 0 |
| 49.9960 | -10.9590 | 8.9220  | H | 0 | 0 | 0 | 0 | 0 | 0 | 0 | 0 | 0 | 0 | 0 |
| 42.4440 | -9.7180  | 5.1550  | O | 0 | 0 | 0 | 0 | 0 | 0 | 0 | 0 | 0 | 0 | 0 |
| 47.5430 | -12.2070 | 9.4560  | O | 0 | 0 | 0 | 0 | 0 | 0 | 0 | 0 | 0 | 0 | 0 |
| 44.8990 | -13.6230 | 5.6540  | C | 0 | 0 | 0 | 0 | 0 | 0 | 0 | 0 | 0 | 0 | 0 |
| 45.9270 | -13.8980 | 5.3930  | H | 0 | 0 | 0 | 0 | 0 | 0 | 0 | 0 | 0 | 0 | 0 |
| 44.2950 | -13.7240 | 4.7450  | H | 0 | 0 | 0 | 0 | 0 | 0 | 0 | 0 | 0 | 0 | 0 |
| 44.5330 | -14.3580 | 6.3800  | H | 0 | 0 | 0 | 0 | 0 | 0 | 0 | 0 | 0 | 0 | 0 |
| 45.3550 | -11.2200 | 5.1610  | C | 0 | 0 | 0 | 0 | 0 | 0 | 0 | 0 | 0 | 0 | 0 |
| 44.7800 | -11.2860 | 4.2310  | H | 0 | 0 | 0 | 0 | 0 | 0 | 0 | 0 | 0 | 0 | 0 |
| 46.3990 | -11.4320 | 4.9050  | H | 0 | 0 | 0 | 0 | 0 | 0 | 0 | 0 | 0 | 0 | 0 |
| 45.3060 | -10.1850 | 5.5160  | H | 0 | 0 | 0 | 0 | 0 | 0 | 0 | 0 | 0 | 0 | 0 |
| 54.0030 | -17.4830 | 10.4350 | O | 0 | 0 | 0 | 0 | 0 | 0 | 0 | 0 | 0 | 0 | 0 |
| 54.1200 | -17.9290 | 11.2920 | H | 0 | 0 | 0 | 0 | 0 | 0 | 0 | 0 | 0 | 0 | 0 |
| 53.3310 | -16.2560 | 10.6890 | C | 0 | 0 | 0 | 0 | 0 | 0 | 0 | 0 | 0 | 0 | 0 |
| 52.3720 | -16.4770 | 11.1700 | H | 0 | 0 | 0 | 0 | 0 | 0 | 0 | 0 | 0 | 0 | 0 |
| 53.9430 | -15.6610 | 11.3740 | H | 0 | 0 | 0 | 0 | 0 | 0 | 0 | 0 | 0 | 0 | 0 |
| 53.1190 | -15.5200 | 9.3710  | C | 0 | 0 | 0 | 0 | 0 | 0 | 0 | 0 | 0 | 0 | 0 |
| 54.0880 | -15.3800 | 8.8770  | H | 0 | 0 | 0 | 0 | 0 | 0 | 0 | 0 | 0 | 0 | 0 |
| 52.5260 | -16.1490 | 8.6950  | H | 0 | 0 | 0 | 0 | 0 | 0 | 0 | 0 | 0 | 0 | 0 |
| 52.4300 | -14.1680 | 9.5780  | C | 0 | 0 | 0 | 0 | 0 | 0 | 0 | 0 | 0 | 0 | 0 |
| 51.4550 | -14.3330 | 10.0480 | H | 0 | 0 | 0 | 0 | 0 | 0 | 0 | 0 | 0 | 0 | 0 |
| 53.0320 | -13.5710 | 10.2720 | H | 0 | 0 | 0 | 0 | 0 | 0 | 0 | 0 | 0 | 0 | 0 |
| 52.2580 | -13.4210 | 8.2440  | C | 0 | 0 | 0 | 0 | 0 | 0 | 0 | 0 | 0 | 0 | 0 |
| 53.2330 | -13.3570 | 7.7440  | H | 0 | 0 | 0 | 0 | 0 | 0 | 0 | 0 | 0 | 0 | 0 |
| 51.6480 | -14.0300 | 7.5660  | H | 0 | 0 | 0 | 0 | 0 | 0 | 0 | 0 | 0 | 0 | 0 |
| 51.6950 | -12.0580 | 8.3210  | N | 0 | 0 | 3 | 0 | 0 | 0 | 0 | 0 | 0 | 0 | 0 |
| 52.5950 | -11.1440 | 9.0480  | C | 0 | 0 | 0 | 0 | 0 | 0 | 0 | 0 | 0 | 0 | 0 |
| 53.6340 | -11.3590 | 8.7630  | H | 0 | 0 | 0 | 0 | 0 | 0 | 0 | 0 | 0 | 0 | 0 |
| 52.5260 | -11.3110 | 10.1300 | H | 0 | 0 | 0 | 0 | 0 | 0 | 0 | 0 | 0 | 0 | 0 |
| 52.3540 | -9.6630  | 8.7590  | C | 0 | 0 | 0 | 0 | 0 | 0 | 0 | 0 | 0 | 0 | 0 |
| 51.3840 | -9.3210  | 9.1330  | H | 0 | 0 | 0 | 0 | 0 | 0 | 0 | 0 | 0 | 0 | 0 |
| 53.1010 | -9.0520  | 9.2800  | H | 0 | 0 | 0 | 0 | 0 | 0 | 0 | 0 | 0 | 0 | 0 |
| 52.4770 | -9.3650  | 7.2880  | C | 0 | 0 | 0 | 0 | 0 | 0 | 0 | 0 | 0 | 0 | 0 |
| 51.2460 | -9.1280  | 6.7530  | O | 0 | 0 | 0 | 0 | 0 | 0 | 0 | 0 | 0 | 0 | 0 |
| 51.1760 | -8.8830  | 5.3380  | C | 0 | 0 | 0 | 0 | 0 | 0 | 0 | 0 | 0 | 0 | 0 |
| 52.0840 | -9.2240  | 4.8250  | H | 0 | 0 | 0 | 0 | 0 | 0 | 0 | 0 | 0 | 0 | 0 |
| 50.3570 | -9.5070  | 4.9600  | H | 0 | 0 | 0 | 0 | 0 | 0 | 0 | 0 | 0 | 0 | 0 |
| 50.8900 | -7.3950  | 5.0270  | C | 0 | 0 | 0 | 0 | 0 | 0 | 0 | 0 | 0 | 0 | 0 |
| 50.7830 | -7.2440  | 3.4910  | C | 0 | 0 | 0 | 0 | 0 | 0 | 0 | 0 | 0 | 0 | 0 |
| 51.7140 | -7.5760  | 3.0180  | H | 0 | 0 | 0 | 0 | 0 | 0 | 0 | 0 | 0 | 0 | 0 |
| 49.9860 | -7.8820  | 3.0910  | H | 0 | 0 | 0 | 0 | 0 | 0 | 0 | 0 | 0 | 0 | 0 |
| 50.6100 | -5.8670  | 3.1120  | O | 0 | 0 | 0 | 0 | 0 | 0 | 0 | 0 | 0 | 0 | 0 |
| 49.4070 | -5.5040  | 2.5810  | C | 0 | 0 | 0 | 0 | 0 | 0 | 0 | 0 | 0 | 0 | 0 |
| 49.4410 | -4.0320  | 2.2450  | C | 0 | 0 | 0 | 0 | 0 | 0 | 0 | 0 | 0 | 0 | 0 |
| 49.6500 | -3.4720  | 3.1630  | H | 0 | 0 | 0 | 0 | 0 | 0 | 0 | 0 | 0 | 0 | 0 |
| 50.2510 | -3.8590  | 1.5280  | H | 0 | 0 | 0 | 0 | 0 | 0 | 0 | 0 | 0 | 0 | 0 |
| 48.1300 | -3.5510  | 1.6490  | C | 0 | 0 | 0 | 0 | 0 | 0 | 0 | 0 | 0 | 0 | 0 |
| 47.8960 | -4.0900  | 0.7250  | H | 0 | 0 | 0 | 0 | 0 | 0 | 0 | 0 | 0 | 0 | 0 |
| 48.1860 | -2.4830  | 1.4170  | H | 0 | 0 | 0 | 0 | 0 | 0 | 0 | 0 | 0 | 0 | 0 |
| 47.3000 | -3.7070  | 2.3470  | H | 0 | 0 | 0 | 0 | 0 | 0 | 0 | 0 | 0 | 0 | 0 |
| 53.5390 | -9.3300  | 6.6810  | O | 0 | 0 | 0 | 0 | 0 | 0 | 0 | 0 | 0 | 0 | 0 |
| 48.4490 | -6.2450  | 2.4110  | O | 0 | 0 | 0 | 0 | 0 | 0 | 0 | 0 | 0 | 0 | 0 |
| 49.5740 | -6.9610  | 5.6990  | C | 0 | 0 | 0 | 0 | 0 | 0 | 0 | 0 | 0 | 0 | 0 |
| 49.3500 | -5.9070  | 5.5030  | H | 0 | 0 | 0 | 0 | 0 | 0 | 0 | 0 | 0 | 0 | 0 |
| 49.6180 | -7.0830  | 6.7870  | H | 0 | 0 | 0 | 0 | 0 | 0 | 0 | 0 | 0 | 0 | 0 |
| 48.7300 | -7.5560  | 5.3320  | H | 0 | 0 | 0 | 0 | 0 | 0 | 0 | 0 | 0 | 0 | 0 |
| 52.0240 | -6.5030  | 5.5680  | C | 0 | 0 | 0 | 0 | 0 | 0 | 0 | 0 | 0 | 0 | 0 |
| 52.1120 | -6.5770  | 6.6570  | H | 0 | 0 | 0 | 0 | 0 | 0 | 0 | 0 | 0 | 0 | 0 |
| 51.8510 | -5.4460  | 5.3340  | H | 0 | 0 | 0 | 0 | 0 | 0 | 0 | 0 | 0 | 0 | 0 |
| 52.9880 | -6.7860  | 5.1320  | H | 0 | 0 | 0 | 0 | 0 | 0 | 0 | 0 | 0 | 0 | 0 |

|   |   |   |   |   |   |
|---|---|---|---|---|---|
| 1 | 2 | 1 | 0 | 0 | 0 |
| 1 | 3 | 1 | 0 | 0 | 0 |
| 3 | 4 | 1 | 0 | 0 | 0 |
| 3 | 5 | 1 | 0 | 0 | 0 |
| 3 | 6 | 1 | 0 | 0 | 0 |
| 6 | 7 | 1 | 0 | 0 | 0 |

|    |    |   |   |   |   |   |
|----|----|---|---|---|---|---|
| 6  | 8  | 1 | 0 | 0 | 0 | 0 |
| 6  | 9  | 1 | 0 | 0 | 0 | 0 |
| 9  | 10 | 1 | 0 | 0 | 0 | 0 |
| 9  | 11 | 1 | 0 | 0 | 0 | 0 |
| 9  | 12 | 1 | 0 | 0 | 0 | 0 |
| 12 | 13 | 1 | 0 | 0 | 0 | 0 |
| 12 | 14 | 1 | 0 | 0 | 0 | 0 |
| 12 | 15 | 1 | 0 | 0 | 0 | 0 |
| 15 | 16 | 1 | 0 | 0 | 0 | 0 |
| 15 | 17 | 1 | 0 | 0 | 0 | 0 |
| 17 | 18 | 1 | 0 | 0 | 0 | 0 |
| 17 | 19 | 1 | 0 | 0 | 0 | 0 |
| 17 | 20 | 1 | 0 | 0 | 0 | 0 |
| 20 | 21 | 1 | 0 | 0 | 0 | 0 |
| 20 | 22 | 1 | 0 | 0 | 0 | 0 |
| 20 | 23 | 1 | 0 | 0 | 0 | 0 |
| 23 | 24 | 1 | 0 | 0 | 0 | 0 |
| 23 | 40 | 2 | 0 | 0 | 0 | 0 |
| 24 | 25 | 1 | 0 | 0 | 0 | 0 |
| 25 | 26 | 1 | 0 | 0 | 0 | 0 |
| 25 | 27 | 1 | 0 | 0 | 0 | 0 |
| 25 | 28 | 1 | 0 | 0 | 0 | 0 |
| 28 | 29 | 1 | 0 | 0 | 0 | 0 |
| 28 | 42 | 1 | 0 | 0 | 0 | 0 |
| 28 | 46 | 1 | 0 | 0 | 0 | 0 |
| 29 | 30 | 1 | 0 | 0 | 0 | 0 |
| 29 | 31 | 1 | 0 | 0 | 0 | 0 |
| 29 | 32 | 1 | 0 | 0 | 0 | 0 |
| 32 | 33 | 1 | 0 | 0 | 0 | 0 |
| 33 | 34 | 1 | 0 | 0 | 0 | 0 |
| 33 | 41 | 2 | 0 | 0 | 0 | 0 |
| 34 | 35 | 1 | 0 | 0 | 0 | 0 |
| 34 | 36 | 1 | 0 | 0 | 0 | 0 |
| 34 | 37 | 1 | 0 | 0 | 0 | 0 |
| 37 | 38 | 1 | 0 | 0 | 0 | 0 |
| 37 | 39 | 1 | 0 | 0 | 0 | 0 |
| 37 | 64 | 1 | 0 | 0 | 0 | 0 |
| 42 | 43 | 1 | 0 | 0 | 0 | 0 |
| 42 | 44 | 1 | 0 | 0 | 0 | 0 |
| 42 | 45 | 1 | 0 | 0 | 0 | 0 |
| 46 | 47 | 1 | 0 | 0 | 0 | 0 |
| 46 | 48 | 1 | 0 | 0 | 0 | 0 |
| 46 | 49 | 1 | 0 | 0 | 0 | 0 |
| 50 | 51 | 1 | 0 | 0 | 0 | 0 |
| 50 | 52 | 1 | 0 | 0 | 0 | 0 |
| 52 | 53 | 1 | 0 | 0 | 0 | 0 |
| 52 | 54 | 1 | 0 | 0 | 0 | 0 |
| 52 | 55 | 1 | 0 | 0 | 0 | 0 |
| 55 | 56 | 1 | 0 | 0 | 0 | 0 |
| 55 | 57 | 1 | 0 | 0 | 0 | 0 |
| 55 | 58 | 1 | 0 | 0 | 0 | 0 |
| 58 | 59 | 1 | 0 | 0 | 0 | 0 |
| 58 | 60 | 1 | 0 | 0 | 0 | 0 |
| 58 | 61 | 1 | 0 | 0 | 0 | 0 |
| 61 | 62 | 1 | 0 | 0 | 0 | 0 |
| 61 | 63 | 1 | 0 | 0 | 0 | 0 |
| 61 | 64 | 1 | 0 | 0 | 0 | 0 |
| 64 | 65 | 1 | 0 | 0 | 0 | 0 |
| 65 | 66 | 1 | 0 | 0 | 0 | 0 |
| 65 | 67 | 1 | 0 | 0 | 0 | 0 |
| 65 | 68 | 1 | 0 | 0 | 0 | 0 |
| 68 | 69 | 1 | 0 | 0 | 0 | 0 |
| 68 | 70 | 1 | 0 | 0 | 0 | 0 |
| 68 | 71 | 1 | 0 | 0 | 0 | 0 |
| 71 | 72 | 1 | 0 | 0 | 0 | 0 |
| 71 | 88 | 2 | 0 | 0 | 0 | 0 |
| 72 | 73 | 1 | 0 | 0 | 0 | 0 |
| 73 | 74 | 1 | 0 | 0 | 0 | 0 |
| 73 | 75 | 1 | 0 | 0 | 0 | 0 |
| 73 | 76 | 1 | 0 | 0 | 0 | 0 |
| 76 | 77 | 1 | 0 | 0 | 0 | 0 |
| 76 | 90 | 1 | 0 | 0 | 0 | 0 |
| 76 | 94 | 1 | 0 | 0 | 0 | 0 |
| 77 | 78 | 1 | 0 | 0 | 0 | 0 |
| 77 | 79 | 1 | 0 | 0 | 0 | 0 |
| 77 | 80 | 1 | 0 | 0 | 0 | 0 |
| 80 | 81 | 1 | 0 | 0 | 0 | 0 |
| 81 | 82 | 1 | 0 | 0 | 0 | 0 |
| 81 | 89 | 2 | 0 | 0 | 0 | 0 |
| 82 | 83 | 1 | 0 | 0 | 0 | 0 |
| 82 | 84 | 1 | 0 | 0 | 0 | 0 |

|     |     |   |   |   |   |   |
|-----|-----|---|---|---|---|---|
| 82  | 85  | 1 | 0 | 0 | 0 | 0 |
| 85  | 86  | 1 | 0 | 0 | 0 | 0 |
| 85  | 87  | 1 | 0 | 0 | 0 | 0 |
| 85  | 112 | 1 | 0 | 0 | 0 | 0 |
| 90  | 91  | 1 | 0 | 0 | 0 | 0 |
| 90  | 92  | 1 | 0 | 0 | 0 | 0 |
| 90  | 93  | 1 | 0 | 0 | 0 | 0 |
| 94  | 95  | 1 | 0 | 0 | 0 | 0 |
| 94  | 96  | 1 | 0 | 0 | 0 | 0 |
| 94  | 97  | 1 | 0 | 0 | 0 | 0 |
| 98  | 99  | 1 | 0 | 0 | 0 | 0 |
| 98  | 100 | 1 | 0 | 0 | 0 | 0 |
| 100 | 101 | 1 | 0 | 0 | 0 | 0 |
| 100 | 102 | 1 | 0 | 0 | 0 | 0 |
| 100 | 103 | 1 | 0 | 0 | 0 | 0 |
| 103 | 104 | 1 | 0 | 0 | 0 | 0 |
| 103 | 105 | 1 | 0 | 0 | 0 | 0 |
| 103 | 106 | 1 | 0 | 0 | 0 | 0 |
| 106 | 107 | 1 | 0 | 0 | 0 | 0 |
| 106 | 108 | 1 | 0 | 0 | 0 | 0 |
| 106 | 109 | 1 | 0 | 0 | 0 | 0 |
| 109 | 110 | 1 | 0 | 0 | 0 | 0 |
| 109 | 111 | 1 | 0 | 0 | 0 | 0 |
| 109 | 112 | 1 | 0 | 0 | 0 | 0 |
| 112 | 113 | 1 | 0 | 0 | 0 | 0 |
| 113 | 114 | 1 | 0 | 0 | 0 | 0 |
| 113 | 115 | 1 | 0 | 0 | 0 | 0 |
| 113 | 116 | 1 | 0 | 0 | 0 | 0 |
| 116 | 117 | 1 | 0 | 0 | 0 | 0 |
| 116 | 118 | 1 | 0 | 0 | 0 | 0 |
| 116 | 119 | 1 | 0 | 0 | 0 | 0 |
| 119 | 120 | 1 | 0 | 0 | 0 | 0 |
| 119 | 136 | 2 | 0 | 0 | 0 | 0 |
| 120 | 121 | 1 | 0 | 0 | 0 | 0 |
| 121 | 122 | 1 | 0 | 0 | 0 | 0 |
| 121 | 123 | 1 | 0 | 0 | 0 | 0 |
| 121 | 124 | 1 | 0 | 0 | 0 | 0 |
| 124 | 125 | 1 | 0 | 0 | 0 | 0 |
| 124 | 138 | 1 | 0 | 0 | 0 | 0 |
| 124 | 142 | 1 | 0 | 0 | 0 | 0 |
| 125 | 126 | 1 | 0 | 0 | 0 | 0 |
| 125 | 127 | 1 | 0 | 0 | 0 | 0 |
| 125 | 128 | 1 | 0 | 0 | 0 | 0 |
| 128 | 129 | 1 | 0 | 0 | 0 | 0 |
| 129 | 130 | 1 | 0 | 0 | 0 | 0 |
| 129 | 137 | 2 | 0 | 0 | 0 | 0 |
| 130 | 131 | 1 | 0 | 0 | 0 | 0 |
| 130 | 132 | 1 | 0 | 0 | 0 | 0 |
| 130 | 133 | 1 | 0 | 0 | 0 | 0 |
| 133 | 134 | 1 | 0 | 0 | 0 | 0 |
| 133 | 135 | 1 | 0 | 0 | 0 | 0 |
| 133 | 160 | 1 | 0 | 0 | 0 | 0 |
| 138 | 139 | 1 | 0 | 0 | 0 | 0 |
| 138 | 140 | 1 | 0 | 0 | 0 | 0 |
| 138 | 141 | 1 | 0 | 0 | 0 | 0 |
| 142 | 143 | 1 | 0 | 0 | 0 | 0 |
| 142 | 144 | 1 | 0 | 0 | 0 | 0 |
| 142 | 145 | 1 | 0 | 0 | 0 | 0 |
| 146 | 147 | 1 | 0 | 0 | 0 | 0 |
| 146 | 148 | 1 | 0 | 0 | 0 | 0 |
| 148 | 149 | 1 | 0 | 0 | 0 | 0 |
| 148 | 150 | 1 | 0 | 0 | 0 | 0 |
| 148 | 151 | 1 | 0 | 0 | 0 | 0 |
| 151 | 152 | 1 | 0 | 0 | 0 | 0 |
| 151 | 153 | 1 | 0 | 0 | 0 | 0 |
| 151 | 154 | 1 | 0 | 0 | 0 | 0 |
| 154 | 155 | 1 | 0 | 0 | 0 | 0 |
| 154 | 156 | 1 | 0 | 0 | 0 | 0 |
| 154 | 157 | 1 | 0 | 0 | 0 | 0 |
| 157 | 158 | 1 | 0 | 0 | 0 | 0 |
| 157 | 159 | 1 | 0 | 0 | 0 | 0 |
| 157 | 160 | 1 | 0 | 0 | 0 | 0 |
| 160 | 161 | 1 | 0 | 0 | 0 | 0 |
| 161 | 162 | 1 | 0 | 0 | 0 | 0 |
| 161 | 163 | 1 | 0 | 0 | 0 | 0 |
| 161 | 164 | 1 | 0 | 0 | 0 | 0 |
| 164 | 165 | 1 | 0 | 0 | 0 | 0 |
| 164 | 166 | 1 | 0 | 0 | 0 | 0 |
| 164 | 167 | 1 | 0 | 0 | 0 | 0 |
| 167 | 168 | 1 | 0 | 0 | 0 | 0 |
| 167 | 184 | 2 | 0 | 0 | 0 | 0 |



|        |   |   |   |   |   |
|--------|---|---|---|---|---|
| 168169 | 1 | 0 | 0 | 0 | 0 |
| 169170 | 1 | 0 | 0 | 0 | 0 |
| 169171 | 1 | 0 | 0 | 0 | 0 |
| 169172 | 1 | 0 | 0 | 0 | 0 |
| 172173 | 1 | 0 | 0 | 0 | 0 |
| 172186 | 1 | 0 | 0 | 0 | 0 |
| 172190 | 1 | 0 | 0 | 0 | 0 |
| 173174 | 1 | 0 | 0 | 0 | 0 |
| 173175 | 1 | 0 | 0 | 0 | 0 |
| 173176 | 1 | 0 | 0 | 0 | 0 |
| 176177 | 1 | 0 | 0 | 0 | 0 |
| 177178 | 1 | 0 | 0 | 0 | 0 |
| 177185 | 2 | 0 | 0 | 0 | 0 |
| 178179 | 1 | 0 | 0 | 0 | 0 |
| 178180 | 1 | 0 | 0 | 0 | 0 |
| 178181 | 1 | 0 | 0 | 0 | 0 |
| 181182 | 1 | 0 | 0 | 0 | 0 |
| 181183 | 1 | 0 | 0 | 0 | 0 |
| 181208 | 1 | 0 | 0 | 0 | 0 |
| 186187 | 1 | 0 | 0 | 0 | 0 |
| 186188 | 1 | 0 | 0 | 0 | 0 |
| 186189 | 1 | 0 | 0 | 0 | 0 |
| 190191 | 1 | 0 | 0 | 0 | 0 |
| 190192 | 1 | 0 | 0 | 0 | 0 |
| 190193 | 1 | 0 | 0 | 0 | 0 |
| 194195 | 1 | 0 | 0 | 0 | 0 |
| 194196 | 1 | 0 | 0 | 0 | 0 |
| 196197 | 1 | 0 | 0 | 0 | 0 |
| 196198 | 1 | 0 | 0 | 0 | 0 |
| 196199 | 1 | 0 | 0 | 0 | 0 |
| 199200 | 1 | 0 | 0 | 0 | 0 |
| 199201 | 1 | 0 | 0 | 0 | 0 |
| 199202 | 1 | 0 | 0 | 0 | 0 |
| 202203 | 1 | 0 | 0 | 0 | 0 |
| 202204 | 1 | 0 | 0 | 0 | 0 |
| 202205 | 1 | 0 | 0 | 0 | 0 |
| 205206 | 1 | 0 | 0 | 0 | 0 |
| 205207 | 1 | 0 | 0 | 0 | 0 |
| 205208 | 1 | 0 | 0 | 0 | 0 |
| 208209 | 1 | 0 | 0 | 0 | 0 |
| 209210 | 1 | 0 | 0 | 0 | 0 |
| 209211 | 1 | 0 | 0 | 0 | 0 |
| 209212 | 1 | 0 | 0 | 0 | 0 |
| 212213 | 1 | 0 | 0 | 0 | 0 |
| 212214 | 1 | 0 | 0 | 0 | 0 |
| 212215 | 1 | 0 | 0 | 0 | 0 |
| 215216 | 1 | 0 | 0 | 0 | 0 |
| 215233 | 2 | 0 | 0 | 0 | 0 |
| 216217 | 1 | 0 | 0 | 0 | 0 |
| 217218 | 1 | 0 | 0 | 0 | 0 |
| 217219 | 1 | 0 | 0 | 0 | 0 |
| 217220 | 1 | 0 | 0 | 0 | 0 |
| 220221 | 1 | 0 | 0 | 0 | 0 |
| 220235 | 1 | 0 | 0 | 0 | 0 |
| 220239 | 1 | 0 | 0 | 0 | 0 |
| 221222 | 1 | 0 | 0 | 0 | 0 |
| 221223 | 1 | 0 | 0 | 0 | 0 |
| 221224 | 1 | 0 | 0 | 0 | 0 |
| 224225 | 1 | 0 | 0 | 0 | 0 |
| 225226 | 1 | 0 | 0 | 0 | 0 |
| 225234 | 2 | 0 | 0 | 0 | 0 |
| 226227 | 1 | 0 | 0 | 0 | 0 |
| 226228 | 1 | 0 | 0 | 0 | 0 |
| 226229 | 1 | 0 | 0 | 0 | 0 |
| 229230 | 1 | 0 | 0 | 0 | 0 |
| 229231 | 1 | 0 | 0 | 0 | 0 |
| 229232 | 1 | 0 | 0 | 0 | 0 |
| 235236 | 1 | 0 | 0 | 0 | 0 |
| 235237 | 1 | 0 | 0 | 0 | 0 |
| 235238 | 1 | 0 | 0 | 0 | 0 |
| 239240 | 1 | 0 | 0 | 0 | 0 |
| 239241 | 1 | 0 | 0 | 0 | 0 |
| 239242 | 1 | 0 | 0 | 0 | 0 |

M END  
> <NAME>  
F28\_1

\$\$\$  
F32\_1  
MOE2012

3D



|         |         |         |   |   |   |   |   |   |   |   |   |   |   |   |   |
|---------|---------|---------|---|---|---|---|---|---|---|---|---|---|---|---|---|
| 19.4120 | -4.2130 | -2.4530 | H | 0 | 0 | 0 | 0 | 0 | 0 | 0 | 0 | 0 | 0 | 0 | 0 |
| 20.6930 | -2.5730 | -1.7950 | C | 0 | 0 | 0 | 0 | 0 | 0 | 0 | 0 | 0 | 0 | 0 | 0 |
| 21.8370 | -3.0590 | -2.7200 | C | 0 | 0 | 0 | 0 | 0 | 0 | 0 | 0 | 0 | 0 | 0 | 0 |
| 22.3490 | -3.9160 | -2.2650 | H | 0 | 0 | 0 | 0 | 0 | 0 | 0 | 0 | 0 | 0 | 0 | 0 |
| 21.4250 | -3.3710 | -3.6890 | H | 0 | 0 | 0 | 0 | 0 | 0 | 0 | 0 | 0 | 0 | 0 | 0 |
| 22.8060 | -2.0180 | -2.9260 | O | 0 | 0 | 0 | 0 | 0 | 0 | 0 | 0 | 0 | 0 | 0 | 0 |
| 23.7950 | -2.3210 | -3.8140 | C | 0 | 0 | 0 | 0 | 0 | 0 | 0 | 0 | 0 | 0 | 0 | 0 |
| 24.8380 | -1.2330 | -3.8330 | C | 0 | 0 | 0 | 0 | 0 | 0 | 0 | 0 | 0 | 0 | 0 | 0 |
| 24.9460 | -0.8770 | -4.8620 | H | 0 | 0 | 0 | 0 | 0 | 0 | 0 | 0 | 0 | 0 | 0 | 0 |
| 24.4780 | -0.3880 | -3.2370 | H | 0 | 0 | 0 | 0 | 0 | 0 | 0 | 0 | 0 | 0 | 0 | 0 |
| 26.1510 | -1.7950 | -3.2820 | C | 0 | 0 | 0 | 0 | 0 | 0 | 0 | 0 | 0 | 0 | 0 | 0 |
| 26.5420 | -2.5390 | -3.9910 | H | 0 | 0 | 0 | 0 | 0 | 0 | 0 | 0 | 0 | 0 | 0 | 0 |
| 25.9530 | -2.3880 | -2.3800 | H | 0 | 0 | 0 | 0 | 0 | 0 | 0 | 0 | 0 | 0 | 0 | 0 |
| 18.2880 | -5.5860 | -0.1830 | O | 0 | 0 | 0 | 0 | 0 | 0 | 0 | 0 | 0 | 0 | 0 | 0 |
| 23.8620 | -3.3480 | -4.4780 | O | 0 | 0 | 0 | 0 | 0 | 0 | 0 | 0 | 0 | 0 | 0 | 0 |
| 19.9090 | -1.4420 | -2.4850 | C | 0 | 0 | 0 | 0 | 0 | 0 | 0 | 0 | 0 | 0 | 0 | 0 |
| 20.5580 | -0.5920 | -2.7230 | H | 0 | 0 | 0 | 0 | 0 | 0 | 0 | 0 | 0 | 0 | 0 | 0 |
| 19.1000 | -1.0660 | -1.8490 | H | 0 | 0 | 0 | 0 | 0 | 0 | 0 | 0 | 0 | 0 | 0 | 0 |
| 19.4610 | -1.7910 | -3.4230 | H | 0 | 0 | 0 | 0 | 0 | 0 | 0 | 0 | 0 | 0 | 0 | 0 |
| 21.2620 | -2.0320 | -0.4700 | C | 0 | 0 | 0 | 0 | 0 | 0 | 0 | 0 | 0 | 0 | 0 | 0 |
| 20.4630 | -1.7130 | 0.2080  | H | 0 | 0 | 0 | 0 | 0 | 0 | 0 | 0 | 0 | 0 | 0 | 0 |
| 21.9140 | -1.1670 | -0.6330 | H | 0 | 0 | 0 | 0 | 0 | 0 | 0 | 0 | 0 | 0 | 0 | 0 |
| 21.8500 | -2.7990 | 0.0470  | H | 0 | 0 | 0 | 0 | 0 | 0 | 0 | 0 | 0 | 0 | 0 | 0 |
| 24.7570 | 0.5800  | 3.9040  | O | 0 | 0 | 0 | 0 | 0 | 0 | 0 | 0 | 0 | 0 | 0 | 0 |
| 24.9920 | 1.1430  | 4.6690  | H | 0 | 0 | 0 | 0 | 0 | 0 | 0 | 0 | 0 | 0 | 0 | 0 |
| 25.4560 | 1.1280  | 2.7880  | C | 0 | 0 | 0 | 0 | 0 | 0 | 0 | 0 | 0 | 0 | 0 | 0 |
| 24.9510 | 2.0510  | 2.4870  | H | 0 | 0 | 0 | 0 | 0 | 0 | 0 | 0 | 0 | 0 | 0 | 0 |
| 26.4790 | 1.3660  | 3.0980  | H | 0 | 0 | 0 | 0 | 0 | 0 | 0 | 0 | 0 | 0 | 0 | 0 |
| 25.4630 | 0.1090  | 1.6580  | C | 0 | 0 | 0 | 0 | 0 | 0 | 0 | 0 | 0 | 0 | 0 | 0 |
| 25.9700 | -0.8020 | 1.9990  | H | 0 | 0 | 0 | 0 | 0 | 0 | 0 | 0 | 0 | 0 | 0 | 0 |
| 24.4330 | -0.1900 | 1.4260  | H | 0 | 0 | 0 | 0 | 0 | 0 | 0 | 0 | 0 | 0 | 0 | 0 |
| 26.1440 | 0.6650  | 0.4100  | C | 0 | 0 | 0 | 0 | 0 | 0 | 0 | 0 | 0 | 0 | 0 | 0 |
| 25.5680 | 1.5180  | 0.0290  | H | 0 | 0 | 0 | 0 | 0 | 0 | 0 | 0 | 0 | 0 | 0 | 0 |
| 27.1420 | 1.0400  | 0.6680  | H | 0 | 0 | 0 | 0 | 0 | 0 | 0 | 0 | 0 | 0 | 0 | 0 |
| 26.2700 | -0.4030 | -0.6780 | C | 0 | 0 | 0 | 0 | 0 | 0 | 0 | 0 | 0 | 0 | 0 | 0 |
| 26.9070 | -1.2170 | -0.3110 | H | 0 | 0 | 0 | 0 | 0 | 0 | 0 | 0 | 0 | 0 | 0 | 0 |
| 25.2770 | -0.8240 | -0.8740 | H | 0 | 0 | 0 | 0 | 0 | 0 | 0 | 0 | 0 | 0 | 0 | 0 |
| 26.8660 | 0.1830  | -1.9680 | C | 0 | 0 | 0 | 0 | 0 | 0 | 0 | 0 | 0 | 0 | 0 | 0 |
| 26.1750 | 0.9300  | -2.3790 | H | 0 | 0 | 0 | 0 | 0 | 0 | 0 | 0 | 0 | 0 | 0 | 0 |
| 27.7760 | 0.7200  | -1.6780 | H | 0 | 0 | 0 | 0 | 0 | 0 | 0 | 0 | 0 | 0 | 0 | 0 |
| 27.2170 | -0.8180 | -2.9890 | N | 0 | 0 | 3 | 0 | 0 | 0 | 0 | 0 | 0 | 0 | 0 | 0 |
| 27.7580 | -0.2180 | -4.2230 | C | 0 | 0 | 0 | 0 | 0 | 0 | 0 | 0 | 0 | 0 | 0 | 0 |
| 27.0110 | 0.4540  | -4.6650 | H | 0 | 0 | 0 | 0 | 0 | 0 | 0 | 0 | 0 | 0 | 0 | 0 |
| 27.9360 | -1.0130 | -4.9590 | H | 0 | 0 | 0 | 0 | 0 | 0 | 0 | 0 | 0 | 0 | 0 | 0 |
| 29.0690 | 0.5610  | -4.0650 | C | 0 | 0 | 0 | 0 | 0 | 0 | 0 | 0 | 0 | 0 | 0 | 0 |
| 29.3170 | 1.0190  | -5.0300 | H | 0 | 0 | 0 | 0 | 0 | 0 | 0 | 0 | 0 | 0 | 0 | 0 |
| 28.9610 | 1.3730  | -3.3390 | H | 0 | 0 | 0 | 0 | 0 | 0 | 0 | 0 | 0 | 0 | 0 | 0 |
| 30.2460 | -0.3050 | -3.6800 | C | 0 | 0 | 0 | 0 | 0 | 0 | 0 | 0 | 0 | 0 | 0 | 0 |
| 31.2900 | 0.4980  | -3.3120 | O | 0 | 0 | 0 | 0 | 0 | 0 | 0 | 0 | 0 | 0 | 0 | 0 |
| 32.5060 | -0.1960 | -2.9830 | C | 0 | 0 | 0 | 0 | 0 | 0 | 0 | 0 | 0 | 0 | 0 | 0 |
| 32.3280 | -0.8000 | -2.0850 | H | 0 | 0 | 0 | 0 | 0 | 0 | 0 | 0 | 0 | 0 | 0 | 0 |
| 32.7740 | -0.8650 | -3.8110 | H | 0 | 0 | 0 | 0 | 0 | 0 | 0 | 0 | 0 | 0 | 0 | 0 |
| 33.6550 | 0.8100  | -2.7300 | C | 0 | 0 | 0 | 0 | 0 | 0 | 0 | 0 | 0 | 0 | 0 | 0 |
| 34.9250 | 0.0070  | -2.3670 | C | 0 | 0 | 0 | 0 | 0 | 0 | 0 | 0 | 0 | 0 | 0 | 0 |
| 34.7430 | -0.5820 | -1.4590 | H | 0 | 0 | 0 | 0 | 0 | 0 | 0 | 0 | 0 | 0 | 0 | 0 |
| 35.1820 | -0.6780 | -3.1840 | H | 0 | 0 | 0 | 0 | 0 | 0 | 0 | 0 | 0 | 0 | 0 | 0 |
| 36.0400 | 0.8860  | -2.1410 | O | 0 | 0 | 0 | 0 | 0 | 0 | 0 | 0 | 0 | 0 | 0 | 0 |
| 37.1790 | 0.2570  | -1.7300 | C | 0 | 0 | 0 | 0 | 0 | 0 | 0 | 0 | 0 | 0 | 0 | 0 |
| 38.2880 | 1.2620  | -1.5410 | C | 0 | 0 | 0 | 0 | 0 | 0 | 0 | 0 | 0 | 0 | 0 | 0 |
| 38.4690 | 1.7450  | -2.5050 | H | 0 | 0 | 0 | 0 | 0 | 0 | 0 | 0 | 0 | 0 | 0 | 0 |
| 37.9540 | 2.0140  | -0.8170 | H | 0 | 0 | 0 | 0 | 0 | 0 | 0 | 0 | 0 | 0 | 0 | 0 |
| 39.5480 | 0.5600  | -1.0190 | C | 0 | 0 | 0 | 0 | 0 | 0 | 0 | 0 | 0 | 0 | 0 | 0 |
| 39.8770 | -0.2210 | -1.7180 | H | 0 | 0 | 0 | 0 | 0 | 0 | 0 | 0 | 0 | 0 | 0 | 0 |
| 39.2570 | 0.0400  | -0.0960 | H | 0 | 0 | 0 | 0 | 0 | 0 | 0 | 0 | 0 | 0 | 0 | 0 |
| 30.2900 | -1.5250 | -3.7430 | O | 0 | 0 | 0 | 0 | 0 | 0 | 0 | 0 | 0 | 0 | 0 | 0 |
| 37.2860 | -0.9480 | -1.5500 | O | 0 | 0 | 0 | 0 | 0 | 0 | 0 | 0 | 0 | 0 | 0 | 0 |
| 33.9050 | 1.6540  | -3.9950 | C | 0 | 0 | 0 | 0 | 0 | 0 | 0 | 0 | 0 | 0 | 0 | 0 |
| 34.7180 | 2.3730  | -3.8440 | H | 0 | 0 | 0 | 0 | 0 | 0 | 0 | 0 | 0 | 0 | 0 | 0 |
| 33.0150 | 2.2260  | -4.2790 | H | 0 | 0 | 0 | 0 | 0 | 0 | 0 | 0 | 0 | 0 | 0 | 0 |
| 34.1770 | 1.0170  | -4.8440 | H | 0 | 0 | 0 | 0 | 0 | 0 | 0 | 0 | 0 | 0 | 0 | 0 |
| 33.2840 | 1.7610  | -1.5770 | C | 0 | 0 | 0 | 0 | 0 | 0 | 0 | 0 | 0 | 0 | 0 | 0 |
| 32.3840 | 2.3420  | -1.8070 | H | 0 | 0 | 0 | 0 | 0 | 0 | 0 | 0 | 0 | 0 | 0 | 0 |
| 34.0880 | 2.4760  | -1.3710 | H | 0 | 0 | 0 | 0 | 0 | 0 | 0 | 0 | 0 | 0 | 0 | 0 |
| 33.0910 | 1.2010  | -0.6540 | H | 0 | 0 | 0 | 0 | 0 | 0 | 0 | 0 | 0 | 0 | 0 | 0 |
| 46.3900 | 2.0930  | 3.9860  | O | 0 | 0 | 0 | 0 | 0 | 0 | 0 | 0 | 0 | 0 | 0 | 0 |
| 46.8590 | 1.6360  | 4.7050  | H | 0 | 0 | 0 | 0 | 0 | 0 | 0 | 0 | 0 | 0 | 0 | 0 |
| 45.3760 | 1.2160  | 3.5190  | C | 0 | 0 | 0 | 0 | 0 | 0 | 0 | 0 | 0 | 0 | 0 | 0 |
| 45.8490 | 0.2940  | 3.1660  | H | 0 | 0 | 0 | 0 | 0 | 0 | 0 | 0 | 0 | 0 | 0 | 0 |
| 44.7110 | 0.9770  | 4.3550  | H | 0 | 0 | 0 | 0 | 0 | 0 | 0 | 0 | 0 | 0 | 0 | 0 |
| 44.6140 | 1.9020  | 2.3950  | C | 0 | 0 | 0 | 0 | 0 | 0 | 0 | 0 | 0 | 0 | 0 | 0 |
| 44.1950 | 2.8460  | 2.7650  | H | 0 | 0 | 0 | 0 | 0 | 0 | 0 | 0 | 0 | 0 | 0 | 0 |

|         |         |         |   |   |   |   |   |   |   |   |   |   |   |   |   |
|---------|---------|---------|---|---|---|---|---|---|---|---|---|---|---|---|---|
| 45.3130 | 2.1770  | 1.5960  | H | 0 | 0 | 0 | 0 | 0 | 0 | 0 | 0 | 0 | 0 | 0 | 0 |
| 43.5050 | 1.0090  | 1.8450  | C | 0 | 0 | 0 | 0 | 0 | 0 | 0 | 0 | 0 | 0 | 0 | 0 |
| 43.9370 | 0.0770  | 1.4600  | H | 0 | 0 | 0 | 0 | 0 | 0 | 0 | 0 | 0 | 0 | 0 | 0 |
| 42.8190 | 0.7370  | 2.6570  | H | 0 | 0 | 0 | 0 | 0 | 0 | 0 | 0 | 0 | 0 | 0 | 0 |
| 42.7270 | 1.7140  | 0.7300  | C | 0 | 0 | 0 | 0 | 0 | 0 | 0 | 0 | 0 | 0 | 0 | 0 |
| 42.3010 | 2.6460  | 1.1190  | H | 0 | 0 | 0 | 0 | 0 | 0 | 0 | 0 | 0 | 0 | 0 | 0 |
| 43.4270 | 1.9710  | -0.0720 | H | 0 | 0 | 0 | 0 | 0 | 0 | 0 | 0 | 0 | 0 | 0 | 0 |
| 41.6100 | 0.8170  | 0.1870  | C | 0 | 0 | 0 | 0 | 0 | 0 | 0 | 0 | 0 | 0 | 0 | 0 |
| 42.0480 | -0.0630 | -0.3010 | H | 0 | 0 | 0 | 0 | 0 | 0 | 0 | 0 | 0 | 0 | 0 | 0 |
| 41.0490 | 0.4490  | 1.0560  | H | 0 | 0 | 0 | 0 | 0 | 0 | 0 | 0 | 0 | 0 | 0 | 0 |
| 40.6590 | 1.4940  | -0.7240 | N | 0 | 0 | 3 | 0 | 0 | 0 | 0 | 0 | 0 | 0 | 0 | 0 |
| 41.3020 | 1.9720  | -1.9670 | C | 0 | 0 | 0 | 0 | 0 | 0 | 0 | 0 | 0 | 0 | 0 | 0 |
| 40.6230 | 1.8670  | -2.8220 | H | 0 | 0 | 0 | 0 | 0 | 0 | 0 | 0 | 0 | 0 | 0 | 0 |
| 42.1740 | 1.3560  | -2.2240 | H | 0 | 0 | 0 | 0 | 0 | 0 | 0 | 0 | 0 | 0 | 0 | 0 |
| 41.7050 | 3.4450  | -1.9030 | C | 0 | 0 | 0 | 0 | 0 | 0 | 0 | 0 | 0 | 0 | 0 | 0 |
| 42.5110 | 3.6230  | -1.1860 | H | 0 | 0 | 0 | 0 | 0 | 0 | 0 | 0 | 0 | 0 | 0 | 0 |
| 42.0900 | 3.7750  | -2.8750 | H | 0 | 0 | 0 | 0 | 0 | 0 | 0 | 0 | 0 | 0 | 0 | 0 |
| 40.5240 | 4.3120  | -1.5640 | C | 0 | 0 | 0 | 0 | 0 | 0 | 0 | 0 | 0 | 0 | 0 | 0 |
| 40.7090 | 4.9160  | -0.3580 | O | 0 | 0 | 0 | 0 | 0 | 0 | 0 | 0 | 0 | 0 | 0 | 0 |
| 39.5910 | 5.6840  | 0.1130  | C | 0 | 0 | 0 | 0 | 0 | 0 | 0 | 0 | 0 | 0 | 0 | 0 |
| 39.2610 | 6.3740  | -0.6750 | H | 0 | 0 | 0 | 0 | 0 | 0 | 0 | 0 | 0 | 0 | 0 | 0 |
| 38.7700 | 4.9950  | 0.3430  | H | 0 | 0 | 0 | 0 | 0 | 0 | 0 | 0 | 0 | 0 | 0 | 0 |
| 39.9870 | 6.4840  | 1.3740  | C | 0 | 0 | 0 | 0 | 0 | 0 | 0 | 0 | 0 | 0 | 0 | 0 |
| 38.7450 | 7.2580  | 1.8770  | C | 0 | 0 | 0 | 0 | 0 | 0 | 0 | 0 | 0 | 0 | 0 | 0 |
| 38.3460 | 7.8930  | 1.0770  | H | 0 | 0 | 0 | 0 | 0 | 0 | 0 | 0 | 0 | 0 | 0 | 0 |
| 37.9620 | 6.5600  | 2.1990  | H | 0 | 0 | 0 | 0 | 0 | 0 | 0 | 0 | 0 | 0 | 0 | 0 |
| 39.1160 | 8.0920  | 2.9870  | O | 0 | 0 | 0 | 0 | 0 | 0 | 0 | 0 | 0 | 0 | 0 | 0 |
| 38.1340 | 8.8850  | 3.4980  | C | 0 | 0 | 0 | 0 | 0 | 0 | 0 | 0 | 0 | 0 | 0 | 0 |
| 38.7160 | 9.8000  | 4.5470  | C | 0 | 0 | 0 | 0 | 0 | 0 | 0 | 0 | 0 | 0 | 0 | 0 |
| 38.0030 | 9.8690  | 5.3760  | H | 0 | 0 | 0 | 0 | 0 | 0 | 0 | 0 | 0 | 0 | 0 | 0 |
| 39.6200 | 9.3320  | 4.9510  | H | 0 | 0 | 0 | 0 | 0 | 0 | 0 | 0 | 0 | 0 | 0 | 0 |
| 39.0000 | 11.1700 | 3.9270  | C | 0 | 0 | 0 | 0 | 0 | 0 | 0 | 0 | 0 | 0 | 0 | 0 |
| 38.0410 | 11.6470 | 3.6800  | H | 0 | 0 | 0 | 0 | 0 | 0 | 0 | 0 | 0 | 0 | 0 | 0 |
| 39.4770 | 11.0480 | 2.9470  | H | 0 | 0 | 0 | 0 | 0 | 0 | 0 | 0 | 0 | 0 | 0 | 0 |
| 39.5370 | 4.4380  | -2.2770 | O | 0 | 0 | 0 | 0 | 0 | 0 | 0 | 0 | 0 | 0 | 0 | 0 |
| 36.9650 | 8.9040  | 3.1390  | O | 0 | 0 | 0 | 0 | 0 | 0 | 0 | 0 | 0 | 0 | 0 | 0 |
| 40.4890 | 5.5290  | 2.4750  | C | 0 | 0 | 0 | 0 | 0 | 0 | 0 | 0 | 0 | 0 | 0 | 0 |
| 40.7560 | 6.0730  | 3.3870  | H | 0 | 0 | 0 | 0 | 0 | 0 | 0 | 0 | 0 | 0 | 0 | 0 |
| 41.3800 | 4.9770  | 2.1540  | H | 0 | 0 | 0 | 0 | 0 | 0 | 0 | 0 | 0 | 0 | 0 | 0 |
| 39.7200 | 4.7950  | 2.7370  | H | 0 | 0 | 0 | 0 | 0 | 0 | 0 | 0 | 0 | 0 | 0 | 0 |
| 41.1250 | 7.4670  | 1.0310  | C | 0 | 0 | 0 | 0 | 0 | 0 | 0 | 0 | 0 | 0 | 0 | 0 |
| 42.0080 | 6.9430  | 0.6500  | H | 0 | 0 | 0 | 0 | 0 | 0 | 0 | 0 | 0 | 0 | 0 | 0 |
| 41.4450 | 8.0390  | 1.9090  | H | 0 | 0 | 0 | 0 | 0 | 0 | 0 | 0 | 0 | 0 | 0 | 0 |
| 40.8060 | 8.1830  | 0.2660  | H | 0 | 0 | 0 | 0 | 0 | 0 | 0 | 0 | 0 | 0 | 0 | 0 |
| 45.5250 | 11.2810 | 0.9800  | O | 0 | 0 | 0 | 0 | 0 | 0 | 0 | 0 | 0 | 0 | 0 | 0 |
| 45.8420 | 12.0510 | 0.4760  | H | 0 | 0 | 0 | 0 | 0 | 0 | 0 | 0 | 0 | 0 | 0 | 0 |
| 44.6550 | 11.7620 | 1.9990  | C | 0 | 0 | 0 | 0 | 0 | 0 | 0 | 0 | 0 | 0 | 0 | 0 |
| 45.1700 | 12.5570 | 2.5480  | H | 0 | 0 | 0 | 0 | 0 | 0 | 0 | 0 | 0 | 0 | 0 | 0 |
| 43.7630 | 12.1760 | 1.5210  | H | 0 | 0 | 0 | 0 | 0 | 0 | 0 | 0 | 0 | 0 | 0 | 0 |
| 44.3060 | 10.6040 | 2.9260  | C | 0 | 0 | 0 | 0 | 0 | 0 | 0 | 0 | 0 | 0 | 0 | 0 |
| 43.8120 | 9.8080  | 2.3540  | H | 0 | 0 | 0 | 0 | 0 | 0 | 0 | 0 | 0 | 0 | 0 | 0 |
| 45.2410 | 10.1600 | 3.2940  | H | 0 | 0 | 0 | 0 | 0 | 0 | 0 | 0 | 0 | 0 | 0 | 0 |
| 43.4490 | 11.0070 | 4.1270  | C | 0 | 0 | 0 | 0 | 0 | 0 | 0 | 0 | 0 | 0 | 0 | 0 |
| 43.4280 | 10.1630 | 4.8280  | H | 0 | 0 | 0 | 0 | 0 | 0 | 0 | 0 | 0 | 0 | 0 | 0 |
| 43.9220 | 11.8440 | 4.6550  | H | 0 | 0 | 0 | 0 | 0 | 0 | 0 | 0 | 0 | 0 | 0 | 0 |
| 42.0070 | 11.3720 | 3.7540  | C | 0 | 0 | 0 | 0 | 1 | 0 | 0 | 0 | 0 | 0 | 0 | 0 |
| 41.9990 | 12.2540 | 3.1040  | H | 0 | 0 | 0 | 0 | 0 | 0 | 0 | 0 | 0 | 0 | 0 | 0 |
| 41.5760 | 10.5380 | 3.1890  | H | 0 | 0 | 0 | 0 | 0 | 0 | 0 | 0 | 0 | 0 | 0 | 0 |
| 41.1680 | 11.6570 | 5.0140  | C | 0 | 0 | 0 | 0 | 0 | 0 | 0 | 0 | 0 | 0 | 0 | 0 |
| 41.1620 | 10.7680 | 5.6570  | H | 0 | 0 | 0 | 0 | 0 | 0 | 0 | 0 | 0 | 0 | 0 | 0 |
| 41.6990 | 12.4330 | 5.5760  | H | 0 | 0 | 0 | 0 | 0 | 0 | 0 | 0 | 0 | 0 | 0 | 0 |
| 39.7910 | 12.1170 | 4.7410  | N | 0 | 0 | 3 | 0 | 0 | 0 | 0 | 0 | 0 | 0 | 0 | 0 |
| 39.0770 | 12.4850 | 5.9820  | C | 0 | 0 | 0 | 0 | 0 | 0 | 0 | 0 | 0 | 0 | 0 | 0 |
| 39.2320 | 11.7050 | 6.7400  | H | 0 | 0 | 0 | 0 | 0 | 0 | 0 | 0 | 0 | 0 | 0 | 0 |
| 37.9950 | 12.5160 | 5.7980  | H | 0 | 0 | 0 | 0 | 0 | 0 | 0 | 0 | 0 | 0 | 0 | 0 |
| 39.4970 | 13.8390 | 6.5680  | C | 0 | 0 | 0 | 0 | 0 | 3 | 0 | 0 | 0 | 0 | 0 | 0 |
| 39.1890 | 13.8630 | 7.6210  | H | 0 | 0 | 0 | 0 | 0 | 0 | 0 | 0 | 0 | 0 | 0 | 0 |
| 40.5800 | 13.9820 | 6.5340  | H | 0 | 0 | 0 | 0 | 0 | 0 | 0 | 0 | 0 | 0 | 0 | 0 |
| 38.8270 | 15.0190 | 5.8990  | C | 0 | 0 | 0 | 0 | 0 | 0 | 0 | 0 | 0 | 0 | 0 | 0 |
| 39.3200 | 16.1760 | 6.4370  | O | 0 | 0 | 0 | 0 | 0 | 0 | 0 | 0 | 0 | 0 | 0 | 0 |
| 38.7140 | 17.3830 | 5.9450  | C | 0 | 0 | 0 | 0 | 0 | 0 | 0 | 0 | 0 | 0 | 0 | 0 |
| 38.9260 | 17.4690 | 4.8720  | H | 0 | 0 | 0 | 0 | 0 | 0 | 0 | 0 | 0 | 0 | 0 | 0 |
| 37.6270 | 17.3220 | 6.0860  | H | 0 | 0 | 0 | 0 | 0 | 0 | 0 | 0 | 0 | 0 | 0 | 0 |
| 39.2730 | 18.6130 | 6.6990  | C | 0 | 0 | 0 | 0 | 0 | 0 | 0 | 0 | 0 | 0 | 0 | 0 |
| 38.5860 | 19.8810 | 6.1410  | C | 0 | 0 | 0 | 0 | 0 | 0 | 0 | 0 | 0 | 0 | 0 | 0 |
| 38.7950 | 19.9790 | 5.0680  | H | 0 | 0 | 0 | 0 | 0 | 0 | 0 | 0 | 0 | 0 | 0 | 0 |
| 37.5000 | 19.8120 | 6.2830  | H | 0 | 0 | 0 | 0 | 0 | 0 | 0 | 0 | 0 | 0 | 0 | 0 |
| 39.0680 | 21.0530 | 6.8170  | O | 0 | 0 | 0 | 0 | 0 | 0 | 0 | 0 | 0 | 0 | 0 | 0 |
| 38.5220 | 22.2270 | 6.3880  | C | 0 | 0 | 0 | 0 | 0 | 0 | 0 | 0 | 0 | 0 | 0 | 0 |
| 39.1140 | 23.3690 | 7.1790  | C | 0 | 0 | 0 | 0 | 0 | 0 | 0 | 0 | 0 | 0 | 0 | 0 |
| 38.8950 | 23.2060 | 8.2400  | H | 0 | 0 | 0 | 0 | 0 | 0 | 0 | 0 | 0 | 0 | 0 | 0 |

|         |         |        |   |   |   |   |   |   |   |   |   |   |   |   |
|---------|---------|--------|---|---|---|---|---|---|---|---|---|---|---|---|
| 40.1990 | 23.3660 | 7.0320 | H | 0 | 0 | 0 | 0 | 0 | 0 | 0 | 0 | 0 | 0 | 0 |
| 38.5520 | 24.7130 | 6.7500 | C | 0 | 0 | 0 | 0 | 0 | 0 | 0 | 0 | 0 | 0 | 0 |
| 38.7590 | 24.9060 | 5.6920 | H | 0 | 0 | 0 | 0 | 0 | 0 | 0 | 0 | 0 | 0 | 0 |
| 38.9990 | 25.5190 | 7.3390 | H | 0 | 0 | 0 | 0 | 0 | 0 | 0 | 0 | 0 | 0 | 0 |
| 37.4660 | 24.7480 | 6.8890 | H | 0 | 0 | 0 | 0 | 0 | 0 | 0 | 0 | 0 | 0 | 0 |
| 37.9470 | 14.9620 | 5.0520 | O | 0 | 0 | 0 | 0 | 0 | 0 | 0 | 0 | 0 | 0 | 0 |
| 37.6850 | 22.3340 | 5.5040 | O | 0 | 0 | 0 | 0 | 0 | 0 | 0 | 0 | 0 | 0 | 0 |
| 38.9890 | 18.4800 | 8.2080 | C | 0 | 0 | 0 | 0 | 0 | 0 | 0 | 0 | 0 | 0 | 0 |
| 39.3710 | 19.3420 | 8.7670 | H | 0 | 0 | 0 | 0 | 0 | 0 | 0 | 0 | 0 | 0 | 0 |
| 39.4610 | 17.5860 | 8.6300 | H | 0 | 0 | 0 | 0 | 0 | 0 | 0 | 0 | 0 | 0 | 0 |
| 37.9120 | 18.4100 | 8.3990 | H | 0 | 0 | 0 | 0 | 0 | 0 | 0 | 0 | 0 | 0 | 0 |
| 40.7980 | 18.7070 | 6.4990 | C | 0 | 0 | 0 | 0 | 0 | 0 | 0 | 0 | 0 | 0 | 0 |
| 41.3100 | 17.8170 | 6.8830 | H | 0 | 0 | 0 | 0 | 0 | 0 | 0 | 0 | 0 | 0 | 0 |
| 41.2200 | 19.5730 | 7.0200 | H | 0 | 0 | 0 | 0 | 0 | 0 | 0 | 0 | 0 | 0 | 0 |
| 41.0480 | 18.8030 | 5.4370 | H | 0 | 0 | 0 | 0 | 0 | 0 | 0 | 0 | 0 | 0 | 0 |
| 1 2 1   | 0 0 0   |        |   |   |   |   |   |   |   |   |   |   |   |   |
| 1 3 1   | 0 0 0   |        |   |   |   |   |   |   |   |   |   |   |   |   |
| 3 4 1   | 0 0 0   |        |   |   |   |   |   |   |   |   |   |   |   |   |
| 3 5 1   | 0 0 0   |        |   |   |   |   |   |   |   |   |   |   |   |   |
| 3 6 1   | 0 0 0   |        |   |   |   |   |   |   |   |   |   |   |   |   |
| 6 7 1   | 0 0 0   |        |   |   |   |   |   |   |   |   |   |   |   |   |
| 6 8 1   | 0 0 0   |        |   |   |   |   |   |   |   |   |   |   |   |   |
| 6 9 1   | 0 0 0   |        |   |   |   |   |   |   |   |   |   |   |   |   |
| 9 10 1  | 0 0 0   |        |   |   |   |   |   |   |   |   |   |   |   |   |
| 9 11 1  | 0 0 0   |        |   |   |   |   |   |   |   |   |   |   |   |   |
| 9 12 1  | 0 0 0   |        |   |   |   |   |   |   |   |   |   |   |   |   |
| 12 13 1 | 0 0 0   |        |   |   |   |   |   |   |   |   |   |   |   |   |
| 12 14 1 | 0 0 0   |        |   |   |   |   |   |   |   |   |   |   |   |   |
| 12 15 1 | 0 0 0   |        |   |   |   |   |   |   |   |   |   |   |   |   |
| 15 16 1 | 0 0 0   |        |   |   |   |   |   |   |   |   |   |   |   |   |
| 15 17 1 | 0 0 0   |        |   |   |   |   |   |   |   |   |   |   |   |   |
| 15 18 1 | 0 0 0   |        |   |   |   |   |   |   |   |   |   |   |   |   |
| 18 19 1 | 0 0 0   |        |   |   |   |   |   |   |   |   |   |   |   |   |
| 18 20 1 | 0 0 0   |        |   |   |   |   |   |   |   |   |   |   |   |   |
| 20 21 1 | 0 0 0   |        |   |   |   |   |   |   |   |   |   |   |   |   |
| 20 22 1 | 0 0 0   |        |   |   |   |   |   |   |   |   |   |   |   |   |
| 20 23 1 | 0 0 0   |        |   |   |   |   |   |   |   |   |   |   |   |   |
| 23 24 1 | 0 0 0   |        |   |   |   |   |   |   |   |   |   |   |   |   |
| 23 25 1 | 0 0 0   |        |   |   |   |   |   |   |   |   |   |   |   |   |
| 23 26 1 | 0 0 0   |        |   |   |   |   |   |   |   |   |   |   |   |   |
| 26 27 1 | 0 0 0   |        |   |   |   |   |   |   |   |   |   |   |   |   |
| 26 43 2 | 0 0 0   |        |   |   |   |   |   |   |   |   |   |   |   |   |
| 27 28 1 | 0 0 0   |        |   |   |   |   |   |   |   |   |   |   |   |   |
| 28 29 1 | 0 0 0   |        |   |   |   |   |   |   |   |   |   |   |   |   |
| 28 30 1 | 0 0 0   |        |   |   |   |   |   |   |   |   |   |   |   |   |
| 28 31 1 | 0 0 0   |        |   |   |   |   |   |   |   |   |   |   |   |   |
| 31 32 1 | 0 0 0   |        |   |   |   |   |   |   |   |   |   |   |   |   |
| 31 45 1 | 0 0 0   |        |   |   |   |   |   |   |   |   |   |   |   |   |
| 31 49 1 | 0 0 0   |        |   |   |   |   |   |   |   |   |   |   |   |   |
| 32 33 1 | 0 0 0   |        |   |   |   |   |   |   |   |   |   |   |   |   |
| 32 34 1 | 0 0 0   |        |   |   |   |   |   |   |   |   |   |   |   |   |
| 32 35 1 | 0 0 0   |        |   |   |   |   |   |   |   |   |   |   |   |   |
| 35 36 1 | 0 0 0   |        |   |   |   |   |   |   |   |   |   |   |   |   |
| 36 37 1 | 0 0 0   |        |   |   |   |   |   |   |   |   |   |   |   |   |
| 36 44 2 | 0 0 0   |        |   |   |   |   |   |   |   |   |   |   |   |   |
| 37 38 1 | 0 0 0   |        |   |   |   |   |   |   |   |   |   |   |   |   |
| 37 39 1 | 0 0 0   |        |   |   |   |   |   |   |   |   |   |   |   |   |
| 37 40 1 | 0 0 0   |        |   |   |   |   |   |   |   |   |   |   |   |   |
| 40 41 1 | 0 0 0   |        |   |   |   |   |   |   |   |   |   |   |   |   |
| 40 42 1 | 0 0 0   |        |   |   |   |   |   |   |   |   |   |   |   |   |
| 40 70 1 | 0 0 0   |        |   |   |   |   |   |   |   |   |   |   |   |   |
| 45 46 1 | 0 0 0   |        |   |   |   |   |   |   |   |   |   |   |   |   |
| 45 47 1 | 0 0 0   |        |   |   |   |   |   |   |   |   |   |   |   |   |
| 45 48 1 | 0 0 0   |        |   |   |   |   |   |   |   |   |   |   |   |   |
| 49 50 1 | 0 0 0   |        |   |   |   |   |   |   |   |   |   |   |   |   |
| 49 51 1 | 0 0 0   |        |   |   |   |   |   |   |   |   |   |   |   |   |
| 49 52 1 | 0 0 0   |        |   |   |   |   |   |   |   |   |   |   |   |   |
| 53 54 1 | 0 0 0   |        |   |   |   |   |   |   |   |   |   |   |   |   |
| 53 55 1 | 0 0 0   |        |   |   |   |   |   |   |   |   |   |   |   |   |
| 55 56 1 | 0 0 0   |        |   |   |   |   |   |   |   |   |   |   |   |   |
| 55 57 1 | 0 0 0   |        |   |   |   |   |   |   |   |   |   |   |   |   |
| 55 58 1 | 0 0 0   |        |   |   |   |   |   |   |   |   |   |   |   |   |
| 58 59 1 | 0 0 0   |        |   |   |   |   |   |   |   |   |   |   |   |   |
| 58 60 1 | 0 0 0   |        |   |   |   |   |   |   |   |   |   |   |   |   |
| 58 61 1 | 0 0 0   |        |   |   |   |   |   |   |   |   |   |   |   |   |
| 61 62 1 | 0 0 0   |        |   |   |   |   |   |   |   |   |   |   |   |   |
| 61 63 1 | 0 0 0   |        |   |   |   |   |   |   |   |   |   |   |   |   |
| 61 64 1 | 0 0 0   |        |   |   |   |   |   |   |   |   |   |   |   |   |
| 64 65 1 | 0 0 0   |        |   |   |   |   |   |   |   |   |   |   |   |   |
| 64 66 1 | 0 0 0   |        |   |   |   |   |   |   |   |   |   |   |   |   |
| 64 67 1 | 0 0 0   |        |   |   |   |   |   |   |   |   |   |   |   |   |

|     |     |   |   |   |   |   |
|-----|-----|---|---|---|---|---|
| 67  | 68  | 1 | 0 | 0 | 0 | 0 |
| 67  | 69  | 1 | 0 | 0 | 0 | 0 |
| 67  | 70  | 1 | 0 | 0 | 0 | 0 |
| 70  | 71  | 1 | 0 | 0 | 0 | 0 |
| 71  | 72  | 1 | 0 | 0 | 0 | 0 |
| 71  | 73  | 1 | 0 | 0 | 0 | 0 |
| 71  | 74  | 1 | 0 | 0 | 0 | 0 |
| 74  | 75  | 1 | 0 | 0 | 0 | 0 |
| 74  | 76  | 1 | 0 | 0 | 0 | 0 |
| 74  | 77  | 1 | 0 | 0 | 0 | 0 |
| 77  | 78  | 1 | 0 | 0 | 0 | 0 |
| 77  | 94  | 2 | 0 | 0 | 0 | 0 |
| 78  | 79  | 1 | 0 | 0 | 0 | 0 |
| 79  | 80  | 1 | 0 | 0 | 0 | 0 |
| 79  | 81  | 1 | 0 | 0 | 0 | 0 |
| 79  | 82  | 1 | 0 | 0 | 0 | 0 |
| 82  | 83  | 1 | 0 | 0 | 0 | 0 |
| 82  | 96  | 1 | 0 | 0 | 0 | 0 |
| 82  | 100 | 1 | 0 | 0 | 0 | 0 |
| 83  | 84  | 1 | 0 | 0 | 0 | 0 |
| 83  | 85  | 1 | 0 | 0 | 0 | 0 |
| 83  | 86  | 1 | 0 | 0 | 0 | 0 |
| 86  | 87  | 1 | 0 | 0 | 0 | 0 |
| 87  | 88  | 1 | 0 | 0 | 0 | 0 |
| 87  | 95  | 2 | 0 | 0 | 0 | 0 |
| 88  | 89  | 1 | 0 | 0 | 0 | 0 |
| 88  | 90  | 1 | 0 | 0 | 0 | 0 |
| 88  | 91  | 1 | 0 | 0 | 0 | 0 |
| 91  | 92  | 1 | 0 | 0 | 0 | 0 |
| 91  | 93  | 1 | 0 | 0 | 0 | 0 |
| 91  | 121 | 1 | 0 | 0 | 0 | 0 |
| 96  | 97  | 1 | 0 | 0 | 0 | 0 |
| 96  | 98  | 1 | 0 | 0 | 0 | 0 |
| 96  | 99  | 1 | 0 | 0 | 0 | 0 |
| 100 | 101 | 1 | 0 | 0 | 0 | 0 |
| 100 | 102 | 1 | 0 | 0 | 0 | 0 |
| 100 | 103 | 1 | 0 | 0 | 0 | 0 |
| 104 | 105 | 1 | 0 | 0 | 0 | 0 |
| 104 | 106 | 1 | 0 | 0 | 0 | 0 |
| 106 | 107 | 1 | 0 | 0 | 0 | 0 |
| 106 | 108 | 1 | 0 | 0 | 0 | 0 |
| 106 | 109 | 1 | 0 | 0 | 0 | 0 |
| 109 | 110 | 1 | 0 | 0 | 0 | 0 |
| 109 | 111 | 1 | 0 | 0 | 0 | 0 |
| 109 | 112 | 1 | 0 | 0 | 0 | 0 |
| 112 | 113 | 1 | 0 | 0 | 0 | 0 |
| 112 | 114 | 1 | 0 | 0 | 0 | 0 |
| 112 | 115 | 1 | 0 | 0 | 0 | 0 |
| 115 | 116 | 1 | 0 | 0 | 0 | 0 |
| 115 | 117 | 1 | 0 | 0 | 0 | 0 |
| 115 | 118 | 1 | 0 | 0 | 0 | 0 |
| 118 | 119 | 1 | 0 | 0 | 0 | 0 |
| 118 | 120 | 1 | 0 | 0 | 0 | 0 |
| 118 | 121 | 1 | 0 | 0 | 0 | 0 |
| 121 | 122 | 1 | 0 | 0 | 0 | 0 |
| 122 | 123 | 1 | 0 | 0 | 0 | 0 |
| 122 | 124 | 1 | 0 | 0 | 0 | 0 |
| 122 | 125 | 1 | 0 | 0 | 0 | 0 |
| 125 | 126 | 1 | 0 | 0 | 0 | 0 |
| 125 | 127 | 1 | 0 | 0 | 0 | 0 |
| 125 | 128 | 1 | 0 | 0 | 0 | 0 |
| 128 | 129 | 1 | 0 | 0 | 0 | 0 |
| 128 | 145 | 2 | 0 | 0 | 0 | 0 |
| 129 | 130 | 1 | 0 | 0 | 0 | 0 |
| 130 | 131 | 1 | 0 | 0 | 0 | 0 |
| 130 | 132 | 1 | 0 | 0 | 0 | 0 |
| 130 | 133 | 1 | 0 | 0 | 0 | 0 |
| 133 | 134 | 1 | 0 | 0 | 0 | 0 |
| 133 | 147 | 1 | 0 | 0 | 0 | 0 |
| 133 | 151 | 1 | 0 | 0 | 0 | 0 |
| 134 | 135 | 1 | 0 | 0 | 0 | 0 |
| 134 | 136 | 1 | 0 | 0 | 0 | 0 |
| 134 | 137 | 1 | 0 | 0 | 0 | 0 |
| 137 | 138 | 1 | 0 | 0 | 0 | 0 |
| 138 | 139 | 1 | 0 | 0 | 0 | 0 |
| 138 | 146 | 2 | 0 | 0 | 0 | 0 |
| 139 | 140 | 1 | 0 | 0 | 0 | 0 |
| 139 | 141 | 1 | 0 | 0 | 0 | 0 |
| 139 | 142 | 1 | 0 | 0 | 0 | 0 |
| 142 | 143 | 1 | 0 | 0 | 0 | 0 |
| 142 | 144 | 1 | 0 | 0 | 0 | 0 |

|        |   |   |   |   |   |
|--------|---|---|---|---|---|
| 142172 | 1 | 0 | 0 | 0 | 0 |
| 147148 | 1 | 0 | 0 | 0 | 0 |
| 147149 | 1 | 0 | 0 | 0 | 0 |
| 147150 | 1 | 0 | 0 | 0 | 0 |
| 151152 | 1 | 0 | 0 | 0 | 0 |
| 151153 | 1 | 0 | 0 | 0 | 0 |
| 151154 | 1 | 0 | 0 | 0 | 0 |
| 155156 | 1 | 0 | 0 | 0 | 0 |
| 155157 | 1 | 0 | 0 | 0 | 0 |
| 157158 | 1 | 0 | 0 | 0 | 0 |
| 157159 | 1 | 0 | 0 | 0 | 0 |
| 157160 | 1 | 0 | 0 | 0 | 0 |
| 160161 | 1 | 0 | 0 | 0 | 0 |
| 160162 | 1 | 0 | 0 | 0 | 0 |
| 160163 | 1 | 0 | 0 | 0 | 0 |
| 163164 | 1 | 0 | 0 | 0 | 0 |
| 163165 | 1 | 0 | 0 | 0 | 0 |
| 163166 | 1 | 0 | 0 | 0 | 0 |
| 166167 | 1 | 0 | 0 | 0 | 0 |
| 166168 | 1 | 0 | 0 | 0 | 0 |
| 166169 | 1 | 0 | 0 | 0 | 0 |
| 169170 | 1 | 0 | 0 | 0 | 0 |
| 169171 | 1 | 0 | 0 | 0 | 0 |
| 169172 | 1 | 0 | 0 | 0 | 0 |
| 172173 | 1 | 0 | 0 | 0 | 0 |
| 173174 | 1 | 0 | 0 | 0 | 0 |
| 173175 | 1 | 0 | 0 | 0 | 0 |
| 173176 | 1 | 0 | 0 | 0 | 0 |
| 176177 | 1 | 0 | 0 | 0 | 0 |
| 176178 | 1 | 0 | 0 | 0 | 0 |
| 176179 | 1 | 0 | 0 | 0 | 0 |
| 179180 | 1 | 0 | 0 | 0 | 0 |
| 179196 | 2 | 0 | 0 | 0 | 0 |
| 180181 | 1 | 0 | 0 | 0 | 0 |
| 181182 | 1 | 0 | 0 | 0 | 0 |
| 181183 | 1 | 0 | 0 | 0 | 0 |
| 181184 | 1 | 0 | 0 | 0 | 0 |
| 184185 | 1 | 0 | 0 | 0 | 0 |
| 184198 | 1 | 0 | 0 | 0 | 0 |
| 184202 | 1 | 0 | 0 | 0 | 0 |
| 185186 | 1 | 0 | 0 | 0 | 0 |
| 185187 | 1 | 0 | 0 | 0 | 0 |
| 185188 | 1 | 0 | 0 | 0 | 0 |
| 188189 | 1 | 0 | 0 | 0 | 0 |
| 189190 | 1 | 0 | 0 | 0 | 0 |
| 189197 | 2 | 0 | 0 | 0 | 0 |
| 190191 | 1 | 0 | 0 | 0 | 0 |
| 190192 | 1 | 0 | 0 | 0 | 0 |
| 190193 | 1 | 0 | 0 | 0 | 0 |
| 193194 | 1 | 0 | 0 | 0 | 0 |
| 193195 | 1 | 0 | 0 | 0 | 0 |
| 193223 | 1 | 0 | 0 | 0 | 0 |
| 198199 | 1 | 0 | 0 | 0 | 0 |
| 198200 | 1 | 0 | 0 | 0 | 0 |
| 198201 | 1 | 0 | 0 | 0 | 0 |
| 202203 | 1 | 0 | 0 | 0 | 0 |
| 202204 | 1 | 0 | 0 | 0 | 0 |
| 202205 | 1 | 0 | 0 | 0 | 0 |
| 206207 | 1 | 0 | 0 | 0 | 0 |
| 206208 | 1 | 0 | 0 | 0 | 0 |
| 208209 | 1 | 0 | 0 | 0 | 0 |
| 208210 | 1 | 0 | 0 | 0 | 0 |
| 208211 | 1 | 0 | 0 | 0 | 0 |
| 211212 | 1 | 0 | 0 | 0 | 0 |
| 211213 | 1 | 0 | 0 | 0 | 0 |
| 211214 | 1 | 0 | 0 | 0 | 0 |
| 214215 | 1 | 0 | 0 | 0 | 0 |
| 214216 | 1 | 0 | 0 | 0 | 0 |
| 214217 | 1 | 0 | 0 | 0 | 0 |
| 217218 | 1 | 0 | 0 | 0 | 0 |
| 217219 | 1 | 0 | 0 | 0 | 0 |
| 217220 | 1 | 0 | 0 | 0 | 0 |
| 220221 | 1 | 0 | 0 | 0 | 0 |
| 220222 | 1 | 0 | 0 | 0 | 0 |
| 220223 | 1 | 0 | 0 | 0 | 0 |
| 223224 | 1 | 0 | 0 | 0 | 0 |
| 224225 | 1 | 0 | 0 | 0 | 0 |
| 224226 | 1 | 0 | 0 | 0 | 0 |
| 224227 | 1 | 0 | 0 | 0 | 0 |
| 227228 | 1 | 0 | 0 | 0 | 0 |
| 227229 | 1 | 0 | 0 | 0 | 0 |

227230 1 0 0 0 0  
230231 1 0 0 0 0  
230248 2 0 0 0 0  
231232 1 0 0 0 0  
232233 1 0 0 0 0  
232234 1 0 0 0 0  
232235 1 0 0 0 0  
235236 1 0 0 0 0  
235250 1 0 0 0 0  
235254 1 0 0 0 0  
236237 1 0 0 0 0  
236238 1 0 0 0 0  
236239 1 0 0 0 0  
239240 1 0 0 0 0  
240241 1 0 0 0 0  
240249 2 0 0 0 0  
241242 1 0 0 0 0  
241243 1 0 0 0 0  
241244 1 0 0 0 0  
244245 1 0 0 0 0  
244246 1 0 0 0 0  
244247 1 0 0 0 0  
250251 1 0 0 0 0  
250252 1 0 0 0 0  
250253 1 0 0 0 0  
254255 1 0 0 0 0  
254256 1 0 0 0 0  
254257 1 0 0 0 0

M END  
> <NAME>  
F32\_1

\$\$\$\$  
F86\_1  
MOE2012 3D

287286 0 0 1 0 0 0 0 0999 V2000  
-3.1910 3.3830 4.9330 C 0 0 0 0 0 0 0 0 0 0 0 0 0 0 0  
-3.0880 3.2170 6.0150 H 0 0 0 0 0 0 0 0 0 0 0 0 0 0 0  
-3.1220 4.4710 4.7970 H 0 0 0 0 0 0 0 0 0 0 0 0 0 0 0  
-2.0960 2.6880 4.2230 N 0 0 0 0 0 0 0 0 0 0 0 0 0 0 0  
-0.7980 3.0580 4.8270 C 0 0 0 0 0 0 0 0 0 0 0 0 0 0 0  
-0.5210 4.0850 4.5520 H 0 0 0 0 0 0 0 0 0 0 0 0 0 0 0  
-0.8990 3.0410 5.9190 H 0 0 0 0 0 0 0 0 0 0 0 0 0 0 0  
0.3320 2.0710 4.4570 C 0 0 0 0 0 0 0 0 0 0 0 0 0 0 0  
0.0700 1.0580 4.7890 H 0 0 0 0 0 0 0 0 0 0 0 0 0 0 0  
0.4320 2.0120 3.3670 H 0 0 0 0 0 0 0 0 0 0 0 0 0 0 0  
1.6560 2.4390 4.9760 N 0 0 3 0 0 0 0 0 0 0 0 0 0 0 0  
1.8890 3.3910 4.6910 H 0 0 0 0 0 0 0 0 0 0 0 0 0 0 0  
-2.1210 2.9710 2.7740 C 0 0 0 0 0 0 0 0 0 0 0 0 0 0 0  
-2.7810 3.8130 2.5260 H 0 0 0 0 0 0 0 0 0 0 0 0 0 0 0  
-1.1420 3.2930 2.3960 H 0 0 0 0 0 0 0 0 0 0 0 0 0 0 0  
-4.5960 2.9030 4.5510 C 0 0 0 0 0 0 0 0 0 0 0 0 0 0 0  
-4.8310 3.1330 3.5070 H 0 0 0 0 0 0 0 0 0 0 0 0 0 0 0  
-4.6930 1.8240 4.7100 H 0 0 0 0 0 0 0 0 0 0 0 0 0 0 0  
-5.5570 3.5640 5.3700 O 0 0 0 0 0 0 0 0 0 0 0 0 0 0 0  
-6.4320 3.2270 5.1100 H 0 0 0 0 0 0 0 0 0 0 0 0 0 0 0  
-2.5440 1.7290 1.9850 C 0 0 0 0 0 0 0 0 0 0 0 0 0 0 0  
-1.8170 0.9210 2.1120 H 0 0 0 0 0 0 0 0 0 0 0 0 0 0 0  
-3.5290 1.3710 2.3000 H 0 0 0 0 0 0 0 0 0 0 0 0 0 0 0  
-2.6160 2.0560 0.6000 O 0 0 0 0 0 0 0 0 0 0 0 0 0 0 0  
-2.8910 1.2490 0.1310 H 0 0 0 0 0 0 0 0 0 0 0 0 0 0 0  
1.7630 2.3050 6.4300 C 0 0 0 0 0 0 0 0 0 0 0 0 0 0 0  
1.4520 1.3010 6.7420 H 0 0 0 0 0 0 0 0 0 0 0 0 0 0 0  
1.1060 3.0300 6.9220 H 0 0 0 0 0 0 0 0 0 0 0 0 0 0 0  
3.1910 2.5760 6.8880 C 0 0 0 0 0 0 0 0 0 0 0 0 0 0 0  
3.5680 3.5140 6.4630 H 0 0 0 0 0 0 0 0 0 0 0 0 0 0 0  
3.2240 2.6930 7.9780 H 0 0 0 0 0 0 0 0 0 0 0 0 0 0 0  
4.1090 1.4320 6.5410 C 0 0 0 0 0 0 0 0 0 0 0 0 0 0 0  
5.1580 1.8790 5.7950 O 0 0 0 0 0 0 0 0 0 0 0 0 0 0 0  
6.1280 0.9030 5.3770 C 0 0 0 0 0 0 0 0 0 0 0 0 0 0 0  
5.7220 -0.1150 5.4260 H 0 0 0 0 0 0 0 0 0 0 0 0 0 0 0  
6.3260 1.1030 4.3170 H 0 0 0 0 0 0 0 0 0 0 0 0 0 0 0  
7.4400 1.0170 6.1880 C 0 0 0 0 0 0 0 0 0 0 0 0 0 0 0  
8.4370 -0.0290 5.6350 C 0 0 0 0 0 0 0 0 0 0 0 0 0 0 0  
8.0070 -1.0350 5.7200 H 0 0 0 0 0 0 0 0 0 0 0 0 0 0 0  
8.6510 0.1750 4.5780 H 0 0 0 0 0 0 0 0 0 0 0 0 0 0 0  
9.6660 0.0180 6.3730 O 0 0 0 0 0 0 0 0 0 0 0 0 0 0 0  
10.5840 -0.9230 6.0150 C 0 0 0 0 0 0 0 0 0 0 0 0 0 0 0  
11.7840 -0.8010 6.9180 C 0 0 0 0 0 0 0 0 0 0 0 0 0 0 0  
12.2960 0.1350 6.6730 H 0 0 0 0 0 0 0 0 0 0 0 0 0 0 0









|    |    |   |   |   |   |   |
|----|----|---|---|---|---|---|
| 1  | 2  | 1 | 0 | 0 | 0 | 0 |
| 1  | 3  | 1 | 0 | 0 | 0 | 0 |
| 1  | 4  | 1 | 0 | 0 | 0 | 0 |
| 1  | 16 | 1 | 0 | 0 | 0 | 0 |
| 4  | 5  | 1 | 0 | 0 | 0 | 0 |
| 4  | 13 | 1 | 0 | 0 | 0 | 0 |
| 5  | 6  | 1 | 0 | 0 | 0 | 0 |
| 5  | 7  | 1 | 0 | 0 | 0 | 0 |
| 5  | 8  | 1 | 0 | 0 | 0 | 0 |
| 8  | 9  | 1 | 0 | 0 | 0 | 0 |
| 8  | 10 | 1 | 0 | 0 | 0 | 0 |
| 8  | 11 | 1 | 0 | 0 | 0 | 0 |
| 11 | 12 | 1 | 0 | 0 | 0 | 0 |
| 11 | 26 | 1 | 0 | 0 | 0 | 0 |
| 13 | 14 | 1 | 0 | 0 | 0 | 0 |
| 13 | 15 | 1 | 0 | 0 | 0 | 0 |
| 13 | 21 | 1 | 0 | 0 | 0 | 0 |
| 16 | 17 | 1 | 0 | 0 | 0 | 0 |
| 16 | 18 | 1 | 0 | 0 | 0 | 0 |
| 16 | 19 | 1 | 0 | 0 | 0 | 0 |
| 19 | 20 | 1 | 0 | 0 | 0 | 0 |
| 21 | 22 | 1 | 0 | 0 | 0 | 0 |
| 21 | 23 | 1 | 0 | 0 | 0 | 0 |
| 21 | 24 | 1 | 0 | 0 | 0 | 0 |
| 24 | 25 | 1 | 0 | 0 | 0 | 0 |
| 26 | 27 | 1 | 0 | 0 | 0 | 0 |
| 26 | 28 | 1 | 0 | 0 | 0 | 0 |
| 26 | 29 | 1 | 0 | 0 | 0 | 0 |
| 29 | 30 | 1 | 0 | 0 | 0 | 0 |
| 29 | 31 | 1 | 0 | 0 | 0 | 0 |
| 29 | 32 | 1 | 0 | 0 | 0 | 0 |
| 32 | 33 | 1 | 0 | 0 | 0 | 0 |
| 32 | 49 | 2 | 0 | 0 | 0 | 0 |
| 33 | 34 | 1 | 0 | 0 | 0 | 0 |
| 34 | 35 | 1 | 0 | 0 | 0 | 0 |
| 34 | 36 | 1 | 0 | 0 | 0 | 0 |
| 34 | 37 | 1 | 0 | 0 | 0 | 0 |
| 37 | 38 | 1 | 0 | 0 | 0 | 0 |
| 37 | 51 | 1 | 0 | 0 | 0 | 0 |
| 37 | 55 | 1 | 0 | 0 | 0 | 0 |
| 38 | 39 | 1 | 0 | 0 | 0 | 0 |
| 38 | 40 | 1 | 0 | 0 | 0 | 0 |
| 38 | 41 | 1 | 0 | 0 | 0 | 0 |
| 41 | 42 | 1 | 0 | 0 | 0 | 0 |
| 42 | 43 | 1 | 0 | 0 | 0 | 0 |
| 42 | 50 | 2 | 0 | 0 | 0 | 0 |
| 43 | 44 | 1 | 0 | 0 | 0 | 0 |
| 43 | 45 | 1 | 0 | 0 | 0 | 0 |
| 43 | 46 | 1 | 0 | 0 | 0 | 0 |
| 46 | 47 | 1 | 0 | 0 | 0 | 0 |
| 46 | 48 | 1 | 0 | 0 | 0 | 0 |
| 46 | 69 | 1 | 0 | 0 | 0 | 0 |
| 51 | 52 | 1 | 0 | 0 | 0 | 0 |
| 51 | 53 | 1 | 0 | 0 | 0 | 0 |
| 51 | 54 | 1 | 0 | 0 | 0 | 0 |
| 55 | 56 | 1 | 0 | 0 | 0 | 0 |
| 55 | 57 | 1 | 0 | 0 | 0 | 0 |
| 55 | 58 | 1 | 0 | 0 | 0 | 0 |
| 59 | 60 | 1 | 0 | 0 | 0 | 0 |
| 59 | 61 | 1 | 0 | 0 | 0 | 0 |
| 59 | 62 | 1 | 0 | 0 | 0 | 0 |
| 59 | 73 | 1 | 0 | 0 | 0 | 0 |
| 62 | 63 | 1 | 0 | 0 | 0 | 0 |
| 62 | 70 | 1 | 0 | 0 | 0 | 0 |
| 63 | 64 | 1 | 0 | 0 | 0 | 0 |
| 63 | 65 | 1 | 0 | 0 | 0 | 0 |
| 63 | 66 | 1 | 0 | 0 | 0 | 0 |
| 66 | 67 | 1 | 0 | 0 | 0 | 0 |
| 66 | 68 | 1 | 0 | 0 | 0 | 0 |
| 66 | 69 | 1 | 0 | 0 | 0 | 0 |
| 69 | 83 | 1 | 0 | 0 | 0 | 0 |
| 70 | 71 | 1 | 0 | 0 | 0 | 0 |
| 70 | 72 | 1 | 0 | 0 | 0 | 0 |
| 70 | 78 | 1 | 0 | 0 | 0 | 0 |
| 73 | 74 | 1 | 0 | 0 | 0 | 0 |
| 73 | 75 | 1 | 0 | 0 | 0 | 0 |
| 73 | 76 | 1 | 0 | 0 | 0 | 0 |
| 76 | 77 | 1 | 0 | 0 | 0 | 0 |
| 78 | 79 | 1 | 0 | 0 | 0 | 0 |
| 78 | 80 | 1 | 0 | 0 | 0 | 0 |
| 78 | 81 | 1 | 0 | 0 | 0 | 0 |

|     |     |   |   |   |   |   |
|-----|-----|---|---|---|---|---|
| 81  | 82  | 1 | 0 | 0 | 0 | 0 |
| 83  | 84  | 1 | 0 | 0 | 0 | 0 |
| 83  | 85  | 1 | 0 | 0 | 0 | 0 |
| 83  | 86  | 1 | 0 | 0 | 0 | 0 |
| 86  | 87  | 1 | 0 | 0 | 0 | 0 |
| 86  | 88  | 1 | 0 | 0 | 0 | 0 |
| 86  | 89  | 1 | 0 | 0 | 0 | 0 |
| 89  | 90  | 1 | 0 | 0 | 0 | 0 |
| 89  | 106 | 2 | 0 | 0 | 0 | 0 |
| 90  | 91  | 1 | 0 | 0 | 0 | 0 |
| 91  | 92  | 1 | 0 | 0 | 0 | 0 |
| 91  | 93  | 1 | 0 | 0 | 0 | 0 |
| 91  | 94  | 1 | 0 | 0 | 0 | 0 |
| 94  | 95  | 1 | 0 | 0 | 0 | 0 |
| 94  | 108 | 1 | 0 | 0 | 0 | 0 |
| 94  | 112 | 1 | 0 | 0 | 0 | 0 |
| 95  | 96  | 1 | 0 | 0 | 0 | 0 |
| 95  | 97  | 1 | 0 | 0 | 0 | 0 |
| 95  | 98  | 1 | 0 | 0 | 0 | 0 |
| 98  | 99  | 1 | 0 | 0 | 0 | 0 |
| 99  | 100 | 1 | 0 | 0 | 0 | 0 |
| 99  | 107 | 2 | 0 | 0 | 0 | 0 |
| 100 | 101 | 1 | 0 | 0 | 0 | 0 |
| 100 | 102 | 1 | 0 | 0 | 0 | 0 |
| 100 | 103 | 1 | 0 | 0 | 0 | 0 |
| 103 | 104 | 1 | 0 | 0 | 0 | 0 |
| 103 | 105 | 1 | 0 | 0 | 0 | 0 |
| 103 | 126 | 1 | 0 | 0 | 0 | 0 |
| 108 | 109 | 1 | 0 | 0 | 0 | 0 |
| 108 | 110 | 1 | 0 | 0 | 0 | 0 |
| 108 | 111 | 1 | 0 | 0 | 0 | 0 |
| 112 | 113 | 1 | 0 | 0 | 0 | 0 |
| 112 | 114 | 1 | 0 | 0 | 0 | 0 |
| 112 | 115 | 1 | 0 | 0 | 0 | 0 |
| 116 | 117 | 1 | 0 | 0 | 0 | 0 |
| 116 | 118 | 1 | 0 | 0 | 0 | 0 |
| 116 | 119 | 1 | 0 | 0 | 0 | 0 |
| 116 | 130 | 1 | 0 | 0 | 0 | 0 |
| 119 | 120 | 1 | 0 | 0 | 0 | 0 |
| 119 | 127 | 1 | 0 | 0 | 0 | 0 |
| 120 | 121 | 1 | 0 | 0 | 0 | 0 |
| 120 | 122 | 1 | 0 | 0 | 0 | 0 |
| 120 | 123 | 1 | 0 | 0 | 0 | 0 |
| 123 | 124 | 1 | 0 | 0 | 0 | 0 |
| 123 | 125 | 1 | 0 | 0 | 0 | 0 |
| 123 | 126 | 1 | 0 | 0 | 0 | 0 |
| 126 | 140 | 1 | 0 | 0 | 0 | 0 |
| 127 | 128 | 1 | 0 | 0 | 0 | 0 |
| 127 | 129 | 1 | 0 | 0 | 0 | 0 |
| 127 | 135 | 1 | 0 | 0 | 0 | 0 |
| 130 | 131 | 1 | 0 | 0 | 0 | 0 |
| 130 | 132 | 1 | 0 | 0 | 0 | 0 |
| 130 | 133 | 1 | 0 | 0 | 0 | 0 |
| 133 | 134 | 1 | 0 | 0 | 0 | 0 |
| 135 | 136 | 1 | 0 | 0 | 0 | 0 |
| 135 | 137 | 1 | 0 | 0 | 0 | 0 |
| 135 | 138 | 1 | 0 | 0 | 0 | 0 |
| 138 | 139 | 1 | 0 | 0 | 0 | 0 |
| 140 | 141 | 1 | 0 | 0 | 0 | 0 |
| 140 | 142 | 1 | 0 | 0 | 0 | 0 |
| 140 | 143 | 1 | 0 | 0 | 0 | 0 |
| 143 | 144 | 1 | 0 | 0 | 0 | 0 |
| 143 | 145 | 1 | 0 | 0 | 0 | 0 |
| 143 | 146 | 1 | 0 | 0 | 0 | 0 |
| 146 | 147 | 1 | 0 | 0 | 0 | 0 |
| 146 | 163 | 2 | 0 | 0 | 0 | 0 |
| 147 | 148 | 1 | 0 | 0 | 0 | 0 |
| 148 | 149 | 1 | 0 | 0 | 0 | 0 |
| 148 | 150 | 1 | 0 | 0 | 0 | 0 |
| 148 | 151 | 1 | 0 | 0 | 0 | 0 |
| 151 | 152 | 1 | 0 | 0 | 0 | 0 |
| 151 | 165 | 1 | 0 | 0 | 0 | 0 |
| 151 | 169 | 1 | 0 | 0 | 0 | 0 |
| 152 | 153 | 1 | 0 | 0 | 0 | 0 |
| 152 | 154 | 1 | 0 | 0 | 0 | 0 |
| 152 | 155 | 1 | 0 | 0 | 0 | 0 |
| 155 | 156 | 1 | 0 | 0 | 0 | 0 |
| 156 | 157 | 1 | 0 | 0 | 0 | 0 |
| 156 | 164 | 2 | 0 | 0 | 0 | 0 |
| 157 | 158 | 1 | 0 | 0 | 0 | 0 |
| 157 | 159 | 1 | 0 | 0 | 0 | 0 |

|        |   |   |   |   |   |
|--------|---|---|---|---|---|
| 157160 | 1 | 0 | 0 | 0 | 0 |
| 160161 | 1 | 0 | 0 | 0 | 0 |
| 160162 | 1 | 0 | 0 | 0 | 0 |
| 160183 | 1 | 0 | 0 | 0 | 0 |
| 165166 | 1 | 0 | 0 | 0 | 0 |
| 165167 | 1 | 0 | 0 | 0 | 0 |
| 165168 | 1 | 0 | 0 | 0 | 0 |
| 169170 | 1 | 0 | 0 | 0 | 0 |
| 169171 | 1 | 0 | 0 | 0 | 0 |
| 169172 | 1 | 0 | 0 | 0 | 0 |
| 173174 | 1 | 0 | 0 | 0 | 0 |
| 173175 | 1 | 0 | 0 | 0 | 0 |
| 173176 | 1 | 0 | 0 | 0 | 0 |
| 173187 | 1 | 0 | 0 | 0 | 0 |
| 176177 | 1 | 0 | 0 | 0 | 0 |
| 176184 | 1 | 0 | 0 | 0 | 0 |
| 177178 | 1 | 0 | 0 | 0 | 0 |
| 177179 | 1 | 0 | 0 | 0 | 0 |
| 177180 | 1 | 0 | 0 | 0 | 0 |
| 180181 | 1 | 0 | 0 | 0 | 0 |
| 180182 | 1 | 0 | 0 | 0 | 0 |
| 180183 | 1 | 0 | 0 | 0 | 0 |
| 183197 | 1 | 0 | 0 | 0 | 0 |
| 184185 | 1 | 0 | 0 | 0 | 0 |
| 184186 | 1 | 0 | 0 | 0 | 0 |
| 184192 | 1 | 0 | 0 | 0 | 0 |
| 187188 | 1 | 0 | 0 | 0 | 0 |
| 187189 | 1 | 0 | 0 | 0 | 0 |
| 187190 | 1 | 0 | 0 | 0 | 0 |
| 190191 | 1 | 0 | 0 | 0 | 0 |
| 192193 | 1 | 0 | 0 | 0 | 0 |
| 192194 | 1 | 0 | 0 | 0 | 0 |
| 192195 | 1 | 0 | 0 | 0 | 0 |
| 195196 | 1 | 0 | 0 | 0 | 0 |
| 197198 | 1 | 0 | 0 | 0 | 0 |
| 197199 | 1 | 0 | 0 | 0 | 0 |
| 197200 | 1 | 0 | 0 | 0 | 0 |
| 200201 | 1 | 0 | 0 | 0 | 0 |
| 200202 | 1 | 0 | 0 | 0 | 0 |
| 200203 | 1 | 0 | 0 | 0 | 0 |
| 203204 | 1 | 0 | 0 | 0 | 0 |
| 203220 | 2 | 0 | 0 | 0 | 0 |
| 204205 | 1 | 0 | 0 | 0 | 0 |
| 205206 | 1 | 0 | 0 | 0 | 0 |
| 205207 | 1 | 0 | 0 | 0 | 0 |
| 205208 | 1 | 0 | 0 | 0 | 0 |
| 208209 | 1 | 0 | 0 | 0 | 0 |
| 208222 | 1 | 0 | 0 | 0 | 0 |
| 208226 | 1 | 0 | 0 | 0 | 0 |
| 209210 | 1 | 0 | 0 | 0 | 0 |
| 209211 | 1 | 0 | 0 | 0 | 0 |
| 209212 | 1 | 0 | 0 | 0 | 0 |
| 212213 | 1 | 0 | 0 | 0 | 0 |
| 213214 | 1 | 0 | 0 | 0 | 0 |
| 213221 | 2 | 0 | 0 | 0 | 0 |
| 214215 | 1 | 0 | 0 | 0 | 0 |
| 214216 | 1 | 0 | 0 | 0 | 0 |
| 214217 | 1 | 0 | 0 | 0 | 0 |
| 217218 | 1 | 0 | 0 | 0 | 0 |
| 217219 | 1 | 0 | 0 | 0 | 0 |
| 217240 | 1 | 0 | 0 | 0 | 0 |
| 222223 | 1 | 0 | 0 | 0 | 0 |
| 222224 | 1 | 0 | 0 | 0 | 0 |
| 222225 | 1 | 0 | 0 | 0 | 0 |
| 226227 | 1 | 0 | 0 | 0 | 0 |
| 226228 | 1 | 0 | 0 | 0 | 0 |
| 226229 | 1 | 0 | 0 | 0 | 0 |
| 230231 | 1 | 0 | 0 | 0 | 0 |
| 230232 | 1 | 0 | 0 | 0 | 0 |
| 230233 | 1 | 0 | 0 | 0 | 0 |
| 230244 | 1 | 0 | 0 | 0 | 0 |
| 233234 | 1 | 0 | 0 | 0 | 0 |
| 233241 | 1 | 0 | 0 | 0 | 0 |
| 234235 | 1 | 0 | 0 | 0 | 0 |
| 234236 | 1 | 0 | 0 | 0 | 0 |
| 234237 | 1 | 0 | 0 | 0 | 0 |
| 237238 | 1 | 0 | 0 | 0 | 0 |
| 237239 | 1 | 0 | 0 | 0 | 0 |
| 237240 | 1 | 0 | 0 | 0 | 0 |
| 240254 | 1 | 0 | 0 | 0 | 0 |
| 241242 | 1 | 0 | 0 | 0 | 0 |

241243 1 0 0 0 0  
241249 1 0 0 0 0  
244245 1 0 0 0 0  
244246 1 0 0 0 0  
244247 1 0 0 0 0  
247248 1 0 0 0 0  
249250 1 0 0 0 0  
249251 1 0 0 0 0  
249252 1 0 0 0 0  
252253 1 0 0 0 0  
254255 1 0 0 0 0  
254256 1 0 0 0 0  
254257 1 0 0 0 0  
257258 1 0 0 0 0  
257259 1 0 0 0 0  
257260 1 0 0 0 0  
260261 1 0 0 0 0  
260278 2 0 0 0 0  
261262 1 0 0 0 0  
262263 1 0 0 0 0  
262264 1 0 0 0 0  
262265 1 0 0 0 0  
265266 1 0 0 0 0  
265280 1 0 0 0 0  
265284 1 0 0 0 0  
266267 1 0 0 0 0  
266268 1 0 0 0 0  
266269 1 0 0 0 0  
269270 1 0 0 0 0  
270271 1 0 0 0 0  
270279 2 0 0 0 0  
271272 1 0 0 0 0  
271273 1 0 0 0 0  
271274 1 0 0 0 0  
274275 1 0 0 0 0  
274276 1 0 0 0 0  
274277 1 0 0 0 0  
280281 1 0 0 0 0  
280282 1 0 0 0 0  
280283 1 0 0 0 0  
284285 1 0 0 0 0  
284286 1 0 0 0 0  
284287 1 0 0 0 0

M END  
> <NAME>  
F86\_1

\$\$\$\$  
F94\_1  
MOE2012 3D

242246 0 0 1 0 0 0 0 0999 V2000  
13.4200 -12.5220 -11.2280 N 0 0 0 0 0 0 0 0 0 0 0 0 0 0 0  
13.9010 -13.5020 -12.0490 C 0 0 0 0 0 0 0 0 0 0 0 0 0 0 0  
13.6310 -14.5430 -11.9420 H 0 0 0 0 0 0 0 0 0 0 0 0 0 0 0  
14.7290 -12.8470 -12.9310 C 0 0 0 0 0 0 0 0 0 0 0 0 0 0 0  
15.3040 -13.2750 -13.7400 H 0 0 0 0 0 0 0 0 0 0 0 0 0 0 0  
14.7600 -11.5010 -12.6680 N 0 0 0 0 0 0 0 0 0 0 0 0 0 0 0  
13.9630 -11.3370 -11.6360 C 0 0 0 0 0 0 0 0 0 0 0 0 0 0 0  
13.7490 -10.3930 -11.1510 H 0 0 0 0 0 0 0 0 0 0 0 0 0 0 0  
12.4860 -12.6980 -10.1360 C 0 0 0 0 0 0 0 0 0 0 0 0 0 0 0  
11.7930 -11.8490 -10.1690 H 0 0 0 0 0 0 0 0 0 0 0 0 0 0 0  
11.8980 -13.6010 -10.3370 H 0 0 0 0 0 0 0 0 0 0 0 0 0 0 0  
13.1480 -12.7700 -8.7520 C 0 0 0 0 0 0 0 0 0 0 0 0 0 0 0  
13.7550 -11.8710 -8.5980 H 0 0 0 0 0 0 0 0 0 0 0 0 0 0 0  
12.3500 -12.7710 -8.0000 H 0 0 0 0 0 0 0 0 0 0 0 0 0 0 0  
13.9770 -13.9710 -8.5950 N 0 0 3 0 0 0 0 0 0 0 0 0 0 0 0  
13.4460 -14.7930 -8.8840 H 0 0 0 0 0 0 0 0 0 0 0 0 0 0 0  
14.4360 -14.1780 -7.2170 C 0 0 0 0 0 0 0 0 0 0 0 0 0 0 0  
14.8510 -15.1920 -7.1580 H 0 0 0 0 0 0 0 0 0 0 0 0 0 0 0  
13.5820 -14.1580 -6.5300 H 0 0 0 0 0 0 0 0 0 0 0 0 0 0 0  
15.4950 -13.1850 -6.7540 C 0 0 0 0 0 0 0 0 0 0 0 0 0 0 0  
15.1340 -12.1530 -6.8170 H 0 0 0 0 0 0 0 0 0 0 0 0 0 0 0  
15.7420 -13.3590 -5.7000 H 0 0 0 0 0 0 0 0 0 0 0 0 0 0 0  
16.7700 -13.3460 -7.5400 C 0 0 0 0 0 0 0 0 0 0 0 0 0 0 0  
17.1030 -12.1720 -8.1440 O 0 0 0 0 0 0 0 0 0 0 0 0 0 0 0  
18.3020 -12.2200 -8.9330 C 0 0 0 0 0 0 0 0 0 0 0 0 0 0 0  
19.1390 -12.5200 -8.2900 H 0 0 0 0 0 0 0 0 0 0 0 0 0 0 0  
18.1770 -12.9720 -9.7220 H 0 0 0 0 0 0 0 0 0 0 0 0 0 0 0  
18.5840 -10.8370 -9.5580 C 0 0 0 0 0 0 0 0 0 0 0 0 0 0 0  
19.8810 -10.9380 -10.3900 C 0 0 0 0 0 0 0 0 0 0 0 0 0 0 0

|         |          |          |   |   |   |   |   |   |   |   |   |   |   |   |
|---------|----------|----------|---|---|---|---|---|---|---|---|---|---|---|---|
| 20.7210 | -11.2230 | -9.7430  | H | 0 | 0 | 0 | 0 | 0 | 0 | 0 | 0 | 0 | 0 | 0 |
| 19.7690 | -11.6960 | -11.1760 | H | 0 | 0 | 0 | 0 | 0 | 0 | 0 | 0 | 0 | 0 | 0 |
| 20.1680 | -9.6760  | -11.0080 | O | 0 | 0 | 0 | 0 | 0 | 0 | 0 | 0 | 0 | 0 | 0 |
| 21.3390 | -9.6240  | -11.7020 | C | 0 | 0 | 0 | 0 | 0 | 0 | 0 | 0 | 0 | 0 | 0 |
| 21.5050 | -8.2450  | -12.2890 | C | 0 | 0 | 0 | 0 | 0 | 0 | 0 | 0 | 0 | 0 | 0 |
| 20.7020 | -8.0910  | -13.0160 | H | 0 | 0 | 0 | 0 | 0 | 0 | 0 | 0 | 0 | 0 | 0 |
| 21.3980 | -7.5170  | -11.4760 | H | 0 | 0 | 0 | 0 | 0 | 0 | 0 | 0 | 0 | 0 | 0 |
| 22.8820 | -8.0910  | -12.9370 | C | 0 | 0 | 0 | 0 | 0 | 0 | 0 | 0 | 0 | 0 | 0 |
| 22.9990 | -8.7830  | -13.7810 | H | 0 | 0 | 0 | 0 | 0 | 0 | 0 | 0 | 0 | 0 | 0 |
| 23.6290 | -8.3980  | -12.1950 | H | 0 | 0 | 0 | 0 | 0 | 0 | 0 | 0 | 0 | 0 | 0 |
| 17.4180 | -14.3830 | -7.5980  | O | 0 | 0 | 0 | 0 | 0 | 0 | 0 | 0 | 0 | 0 | 0 |
| 22.1300 | -10.5480 | -11.8300 | O | 0 | 0 | 0 | 0 | 0 | 0 | 0 | 0 | 0 | 0 | 0 |
| 17.4090 | -10.4150 | -10.4590 | C | 0 | 0 | 0 | 0 | 0 | 0 | 0 | 0 | 0 | 0 | 0 |
| 17.5800 | -9.4330  | -10.9140 | H | 0 | 0 | 0 | 0 | 0 | 0 | 0 | 0 | 0 | 0 | 0 |
| 16.4720 | -10.3520 | -9.8950  | H | 0 | 0 | 0 | 0 | 0 | 0 | 0 | 0 | 0 | 0 | 0 |
| 17.2650 | -11.1370 | -11.2710 | H | 0 | 0 | 0 | 0 | 0 | 0 | 0 | 0 | 0 | 0 | 0 |
| 18.7490 | -9.7780  | -8.4490  | C | 0 | 0 | 0 | 0 | 0 | 0 | 0 | 0 | 0 | 0 | 0 |
| 17.8420 | -9.6870  | -7.8420  | H | 0 | 0 | 0 | 0 | 0 | 0 | 0 | 0 | 0 | 0 | 0 |
| 18.9600 | -8.7870  | -8.8670  | H | 0 | 0 | 0 | 0 | 0 | 0 | 0 | 0 | 0 | 0 | 0 |
| 19.5750 | -10.0390 | -7.7780  | H | 0 | 0 | 0 | 0 | 0 | 0 | 0 | 0 | 0 | 0 | 0 |
| 21.4950 | -4.6490  | -16.0970 | N | 0 | 0 | 0 | 0 | 0 | 0 | 0 | 0 | 0 | 0 | 0 |
| 20.1410 | -4.6180  | -16.2680 | C | 0 | 0 | 0 | 0 | 0 | 0 | 0 | 0 | 0 | 0 | 0 |
| 19.4410 | -4.7970  | -15.4630 | H | 0 | 0 | 0 | 0 | 0 | 0 | 0 | 0 | 0 | 0 | 0 |
| 19.9620 | -4.3290  | -17.6020 | C | 0 | 0 | 0 | 0 | 0 | 0 | 0 | 0 | 0 | 0 | 0 |
| 19.0290 | -4.2180  | -18.1370 | H | 0 | 0 | 0 | 0 | 0 | 0 | 0 | 0 | 0 | 0 | 0 |
| 21.1690 | -4.1830  | -18.2390 | N | 0 | 0 | 0 | 0 | 0 | 0 | 0 | 0 | 0 | 0 | 0 |
| 22.0730 | -4.3820  | -17.3050 | C | 0 | 0 | 0 | 0 | 0 | 0 | 0 | 0 | 0 | 0 | 0 |
| 23.1450 | -4.3470  | -17.4480 | H | 0 | 0 | 0 | 0 | 0 | 0 | 0 | 0 | 0 | 0 | 0 |
| 22.1990 | -4.9130  | -14.8540 | C | 0 | 0 | 0 | 0 | 0 | 0 | 0 | 0 | 0 | 0 | 0 |
| 23.1260 | -4.3310  | -14.8840 | H | 0 | 0 | 0 | 0 | 0 | 0 | 0 | 0 | 0 | 0 | 0 |
| 21.5820 | -4.5130  | -14.0400 | H | 0 | 0 | 0 | 0 | 0 | 0 | 0 | 0 | 0 | 0 | 0 |
| 22.4600 | -6.4130  | -14.6540 | C | 0 | 0 | 0 | 0 | 0 | 0 | 0 | 0 | 0 | 0 | 0 |
| 21.4870 | -6.9170  | -14.7000 | H | 0 | 0 | 0 | 0 | 0 | 0 | 0 | 0 | 0 | 0 | 0 |
| 23.0460 | -6.8220  | -15.4870 | H | 0 | 0 | 0 | 0 | 0 | 0 | 0 | 0 | 0 | 0 | 0 |
| 23.1210 | -6.6940  | -13.3600 | N | 0 | 0 | 3 | 0 | 0 | 0 | 0 | 0 | 0 | 0 | 0 |
| 24.5710 | -6.4050  | -13.4340 | C | 0 | 0 | 0 | 0 | 0 | 0 | 0 | 0 | 0 | 0 | 0 |
| 24.7640 | -5.5320  | -14.0680 | H | 0 | 0 | 0 | 0 | 0 | 0 | 0 | 0 | 0 | 0 | 0 |
| 25.0910 | -7.2430  | -13.9160 | H | 0 | 0 | 0 | 0 | 0 | 0 | 0 | 0 | 0 | 0 | 0 |
| 25.2020 | -6.1320  | -12.0630 | C | 0 | 0 | 0 | 0 | 0 | 0 | 0 | 0 | 0 | 0 | 0 |
| 24.9130 | -6.8870  | -11.3260 | H | 0 | 0 | 0 | 0 | 0 | 0 | 0 | 0 | 0 | 0 | 0 |
| 26.2920 | -6.1680  | -12.1760 | H | 0 | 0 | 0 | 0 | 0 | 0 | 0 | 0 | 0 | 0 | 0 |
| 24.8610 | -4.7650  | -11.5150 | C | 0 | 0 | 0 | 0 | 0 | 0 | 0 | 0 | 0 | 0 | 0 |
| 25.4450 | -4.6220  | -10.2870 | O | 0 | 0 | 0 | 0 | 0 | 0 | 0 | 0 | 0 | 0 | 0 |
| 25.2490 | -3.3430  | -9.6610  | C | 0 | 0 | 0 | 0 | 0 | 0 | 0 | 0 | 0 | 0 | 0 |
| 25.5080 | -2.5460  | -10.3700 | H | 0 | 0 | 0 | 0 | 0 | 0 | 0 | 0 | 0 | 0 | 0 |
| 24.1880 | -3.2470  | -9.3960  | H | 0 | 0 | 0 | 0 | 0 | 0 | 0 | 0 | 0 | 0 | 0 |
| 26.1310 | -3.2230  | -8.3950  | C | 0 | 0 | 0 | 0 | 0 | 0 | 0 | 0 | 0 | 0 | 0 |
| 25.8780 | -1.8380  | -7.7520  | C | 0 | 0 | 0 | 0 | 0 | 0 | 0 | 0 | 0 | 0 | 0 |
| 26.1140 | -1.0420  | -8.4690  | H | 0 | 0 | 0 | 0 | 0 | 0 | 0 | 0 | 0 | 0 | 0 |
| 24.8220 | -1.7490  | -7.4630  | H | 0 | 0 | 0 | 0 | 0 | 0 | 0 | 0 | 0 | 0 | 0 |
| 26.7010 | -1.6660  | -6.5880  | O | 0 | 0 | 0 | 0 | 0 | 0 | 0 | 0 | 0 | 0 | 0 |
| 26.4950 | -0.5020  | -5.9110  | C | 0 | 0 | 0 | 0 | 0 | 0 | 0 | 0 | 0 | 0 | 0 |
| 27.4520 | -0.4250  | -4.7520  | C | 0 | 0 | 0 | 0 | 0 | 0 | 0 | 0 | 0 | 0 | 0 |
| 27.4560 | -1.3940  | -4.2370  | H | 0 | 0 | 0 | 0 | 0 | 0 | 0 | 0 | 0 | 0 | 0 |
| 28.4490 | -0.2420  | -5.1630  | H | 0 | 0 | 0 | 0 | 0 | 0 | 0 | 0 | 0 | 0 | 0 |
| 27.0290 | 0.6670   | -3.7680  | C | 0 | 0 | 0 | 0 | 0 | 0 | 0 | 0 | 0 | 0 | 0 |
| 26.0320 | 0.4030   | -3.3990  | H | 0 | 0 | 0 | 0 | 0 | 0 | 0 | 0 | 0 | 0 | 0 |
| 26.9100 | 1.6380   | -4.2680  | H | 0 | 0 | 0 | 0 | 0 | 0 | 0 | 0 | 0 | 0 | 0 |
| 24.1990 | -3.9080  | -12.0820 | O | 0 | 0 | 0 | 0 | 0 | 0 | 0 | 0 | 0 | 0 | 0 |
| 25.6830 | 0.3590   | -6.2160  | O | 0 | 0 | 0 | 0 | 0 | 0 | 0 | 0 | 0 | 0 | 0 |
| 25.7760 | -4.3400  | -7.3940  | C | 0 | 0 | 0 | 0 | 0 | 0 | 0 | 0 | 0 | 0 | 0 |
| 26.3810 | -4.2710  | -6.4830  | H | 0 | 0 | 0 | 0 | 0 | 0 | 0 | 0 | 0 | 0 | 0 |
| 25.9470 | -5.3330  | -7.8220  | H | 0 | 0 | 0 | 0 | 0 | 0 | 0 | 0 | 0 | 0 | 0 |
| 24.7230 | -4.2810  | -7.0990  | H | 0 | 0 | 0 | 0 | 0 | 0 | 0 | 0 | 0 | 0 | 0 |
| 27.6170 | -3.3660  | -8.7750  | C | 0 | 0 | 0 | 0 | 0 | 0 | 0 | 0 | 0 | 0 | 0 |
| 27.8220 | -4.3360  | -9.2410  | H | 0 | 0 | 0 | 0 | 0 | 0 | 0 | 0 | 0 | 0 | 0 |
| 28.2680 | -3.2850  | -7.8970  | H | 0 | 0 | 0 | 0 | 0 | 0 | 0 | 0 | 0 | 0 | 0 |
| 27.9170 | -2.5860  | -9.4840  | H | 0 | 0 | 0 | 0 | 0 | 0 | 0 | 0 | 0 | 0 | 0 |
| 25.8540 | 0.7330   | 0.4590   | N | 0 | 0 | 0 | 0 | 0 | 0 | 0 | 0 | 0 | 0 | 0 |
| 24.6950 | 1.4580   | 0.4680   | C | 0 | 0 | 0 | 0 | 0 | 0 | 0 | 0 | 0 | 0 | 0 |
| 24.1680 | 1.7340   | -0.4340  | H | 0 | 0 | 0 | 0 | 0 | 0 | 0 | 0 | 0 | 0 | 0 |
| 24.4380 | 1.6920   | 1.8000   | C | 0 | 0 | 0 | 0 | 0 | 0 | 0 | 0 | 0 | 0 | 0 |
| 23.6050 | 2.2320   | 2.2290   | H | 0 | 0 | 0 | 0 | 0 | 0 | 0 | 0 | 0 | 0 | 0 |
| 25.4070 | 1.1310   | 2.5920   | N | 0 | 0 | 0 | 0 | 0 | 0 | 0 | 0 | 0 | 0 | 0 |
| 26.2480 | 0.5650   | 1.7550   | C | 0 | 0 | 0 | 0 | 0 | 0 | 0 | 0 | 0 | 0 | 0 |
| 27.1420 | 0.0220   | 2.0320   | H | 0 | 0 | 0 | 0 | 0 | 0 | 0 | 0 | 0 | 0 | 0 |
| 26.5290 | 0.2190   | -0.7180  | C | 0 | 0 | 0 | 0 | 0 | 0 | 0 | 0 | 0 | 0 | 0 |
| 27.1640 | -0.6160  | -0.3990  | H | 0 | 0 | 0 | 0 | 0 | 0 | 0 | 0 | 0 | 0 | 0 |
| 25.7470 | -0.1960  | -1.3620  | H | 0 | 0 | 0 | 0 | 0 | 0 | 0 | 0 | 0 | 0 | 0 |
| 27.3700 | 1.2900   | -1.4320  | C | 0 | 0 | 0 | 0 | 0 | 0 | 0 | 0 | 0 | 0 | 0 |
| 26.7660 | 2.1780   | -1.6600  | H | 0 | 0 | 0 | 0 | 0 | 0 | 0 | 0 | 0 | 0 | 0 |







|     |     |   |   |   |   |   |
|-----|-----|---|---|---|---|---|
| 28  | 42  | 1 | 0 | 0 | 0 | 0 |
| 28  | 46  | 1 | 0 | 0 | 0 | 0 |
| 29  | 30  | 1 | 0 | 0 | 0 | 0 |
| 29  | 31  | 1 | 0 | 0 | 0 | 0 |
| 29  | 32  | 1 | 0 | 0 | 0 | 0 |
| 32  | 33  | 1 | 0 | 0 | 0 | 0 |
| 33  | 34  | 1 | 0 | 0 | 0 | 0 |
| 33  | 41  | 2 | 0 | 0 | 0 | 0 |
| 34  | 35  | 1 | 0 | 0 | 0 | 0 |
| 34  | 36  | 1 | 0 | 0 | 0 | 0 |
| 34  | 37  | 1 | 0 | 0 | 0 | 0 |
| 37  | 38  | 1 | 0 | 0 | 0 | 0 |
| 37  | 39  | 1 | 0 | 0 | 0 | 0 |
| 37  | 64  | 1 | 0 | 0 | 0 | 0 |
| 42  | 43  | 1 | 0 | 0 | 0 | 0 |
| 42  | 44  | 1 | 0 | 0 | 0 | 0 |
| 42  | 45  | 1 | 0 | 0 | 0 | 0 |
| 46  | 47  | 1 | 0 | 0 | 0 | 0 |
| 46  | 48  | 1 | 0 | 0 | 0 | 0 |
| 46  | 49  | 1 | 0 | 0 | 0 | 0 |
| 50  | 51  | 1 | 0 | 0 | 0 | 0 |
| 50  | 56  | 1 | 0 | 0 | 0 | 0 |
| 50  | 58  | 1 | 0 | 0 | 0 | 0 |
| 51  | 52  | 1 | 0 | 0 | 0 | 0 |
| 51  | 53  | 2 | 0 | 0 | 0 | 0 |
| 53  | 54  | 1 | 0 | 0 | 0 | 0 |
| 53  | 55  | 1 | 0 | 0 | 0 | 0 |
| 55  | 56  | 2 | 0 | 0 | 0 | 0 |
| 56  | 57  | 1 | 0 | 0 | 0 | 0 |
| 58  | 59  | 1 | 0 | 0 | 0 | 0 |
| 58  | 60  | 1 | 0 | 0 | 0 | 0 |
| 58  | 61  | 1 | 0 | 0 | 0 | 0 |
| 61  | 62  | 1 | 0 | 0 | 0 | 0 |
| 61  | 63  | 1 | 0 | 0 | 0 | 0 |
| 61  | 64  | 1 | 0 | 0 | 0 | 0 |
| 64  | 65  | 1 | 0 | 0 | 0 | 0 |
| 65  | 66  | 1 | 0 | 0 | 0 | 0 |
| 65  | 67  | 1 | 0 | 0 | 0 | 0 |
| 65  | 68  | 1 | 0 | 0 | 0 | 0 |
| 68  | 69  | 1 | 0 | 0 | 0 | 0 |
| 68  | 70  | 1 | 0 | 0 | 0 | 0 |
| 68  | 71  | 1 | 0 | 0 | 0 | 0 |
| 71  | 72  | 1 | 0 | 0 | 0 | 0 |
| 71  | 88  | 2 | 0 | 0 | 0 | 0 |
| 72  | 73  | 1 | 0 | 0 | 0 | 0 |
| 73  | 74  | 1 | 0 | 0 | 0 | 0 |
| 73  | 75  | 1 | 0 | 0 | 0 | 0 |
| 73  | 76  | 1 | 0 | 0 | 0 | 0 |
| 76  | 77  | 1 | 0 | 0 | 0 | 0 |
| 76  | 90  | 1 | 0 | 0 | 0 | 0 |
| 76  | 94  | 1 | 0 | 0 | 0 | 0 |
| 77  | 78  | 1 | 0 | 0 | 0 | 0 |
| 77  | 79  | 1 | 0 | 0 | 0 | 0 |
| 77  | 80  | 1 | 0 | 0 | 0 | 0 |
| 80  | 81  | 1 | 0 | 0 | 0 | 0 |
| 81  | 82  | 1 | 0 | 0 | 0 | 0 |
| 81  | 89  | 2 | 0 | 0 | 0 | 0 |
| 82  | 83  | 1 | 0 | 0 | 0 | 0 |
| 82  | 84  | 1 | 0 | 0 | 0 | 0 |
| 82  | 85  | 1 | 0 | 0 | 0 | 0 |
| 85  | 86  | 1 | 0 | 0 | 0 | 0 |
| 85  | 87  | 1 | 0 | 0 | 0 | 0 |
| 85  | 112 | 1 | 0 | 0 | 0 | 0 |
| 90  | 91  | 1 | 0 | 0 | 0 | 0 |
| 90  | 92  | 1 | 0 | 0 | 0 | 0 |
| 90  | 93  | 1 | 0 | 0 | 0 | 0 |
| 94  | 95  | 1 | 0 | 0 | 0 | 0 |
| 94  | 96  | 1 | 0 | 0 | 0 | 0 |
| 94  | 97  | 1 | 0 | 0 | 0 | 0 |
| 98  | 99  | 1 | 0 | 0 | 0 | 0 |
| 98  | 104 | 1 | 0 | 0 | 0 | 0 |
| 98  | 106 | 1 | 0 | 0 | 0 | 0 |
| 99  | 100 | 1 | 0 | 0 | 0 | 0 |
| 99  | 101 | 2 | 0 | 0 | 0 | 0 |
| 101 | 102 | 1 | 0 | 0 | 0 | 0 |
| 101 | 103 | 1 | 0 | 0 | 0 | 0 |
| 103 | 104 | 2 | 0 | 0 | 0 | 0 |
| 104 | 105 | 1 | 0 | 0 | 0 | 0 |
| 106 | 107 | 1 | 0 | 0 | 0 | 0 |
| 106 | 108 | 1 | 0 | 0 | 0 | 0 |
| 106 | 109 | 1 | 0 | 0 | 0 | 0 |

|        |   |   |   |   |   |
|--------|---|---|---|---|---|
| 109110 | 1 | 0 | 0 | 0 | 0 |
| 109111 | 1 | 0 | 0 | 0 | 0 |
| 109112 | 1 | 0 | 0 | 0 | 0 |
| 112113 | 1 | 0 | 0 | 0 | 0 |
| 113114 | 1 | 0 | 0 | 0 | 0 |
| 113115 | 1 | 0 | 0 | 0 | 0 |
| 113116 | 1 | 0 | 0 | 0 | 0 |
| 116117 | 1 | 0 | 0 | 0 | 0 |
| 116118 | 1 | 0 | 0 | 0 | 0 |
| 116119 | 1 | 0 | 0 | 0 | 0 |
| 119120 | 1 | 0 | 0 | 0 | 0 |
| 119136 | 2 | 0 | 0 | 0 | 0 |
| 120121 | 1 | 0 | 0 | 0 | 0 |
| 121122 | 1 | 0 | 0 | 0 | 0 |
| 121123 | 1 | 0 | 0 | 0 | 0 |
| 121124 | 1 | 0 | 0 | 0 | 0 |
| 124125 | 1 | 0 | 0 | 0 | 0 |
| 124138 | 1 | 0 | 0 | 0 | 0 |
| 124142 | 1 | 0 | 0 | 0 | 0 |
| 125126 | 1 | 0 | 0 | 0 | 0 |
| 125127 | 1 | 0 | 0 | 0 | 0 |
| 125128 | 1 | 0 | 0 | 0 | 0 |
| 128129 | 1 | 0 | 0 | 0 | 0 |
| 129130 | 1 | 0 | 0 | 0 | 0 |
| 129137 | 2 | 0 | 0 | 0 | 0 |
| 130131 | 1 | 0 | 0 | 0 | 0 |
| 130132 | 1 | 0 | 0 | 0 | 0 |
| 130133 | 1 | 0 | 0 | 0 | 0 |
| 133134 | 1 | 0 | 0 | 0 | 0 |
| 133135 | 1 | 0 | 0 | 0 | 0 |
| 133160 | 1 | 0 | 0 | 0 | 0 |
| 138139 | 1 | 0 | 0 | 0 | 0 |
| 138140 | 1 | 0 | 0 | 0 | 0 |
| 138141 | 1 | 0 | 0 | 0 | 0 |
| 142143 | 1 | 0 | 0 | 0 | 0 |
| 142144 | 1 | 0 | 0 | 0 | 0 |
| 142145 | 1 | 0 | 0 | 0 | 0 |
| 146147 | 1 | 0 | 0 | 0 | 0 |
| 146152 | 1 | 0 | 0 | 0 | 0 |
| 146154 | 1 | 0 | 0 | 0 | 0 |
| 147148 | 1 | 0 | 0 | 0 | 0 |
| 147149 | 2 | 0 | 0 | 0 | 0 |
| 149150 | 1 | 0 | 0 | 0 | 0 |
| 149151 | 1 | 0 | 0 | 0 | 0 |
| 151152 | 2 | 0 | 0 | 0 | 0 |
| 152153 | 1 | 0 | 0 | 0 | 0 |
| 154155 | 1 | 0 | 0 | 0 | 0 |
| 154156 | 1 | 0 | 0 | 0 | 0 |
| 154157 | 1 | 0 | 0 | 0 | 0 |
| 157158 | 1 | 0 | 0 | 0 | 0 |
| 157159 | 1 | 0 | 0 | 0 | 0 |
| 157160 | 1 | 0 | 0 | 0 | 0 |
| 160161 | 1 | 0 | 0 | 0 | 0 |
| 161162 | 1 | 0 | 0 | 0 | 0 |
| 161163 | 1 | 0 | 0 | 0 | 0 |
| 161164 | 1 | 0 | 0 | 0 | 0 |
| 164165 | 1 | 0 | 0 | 0 | 0 |
| 164166 | 1 | 0 | 0 | 0 | 0 |
| 164167 | 1 | 0 | 0 | 0 | 0 |
| 167168 | 1 | 0 | 0 | 0 | 0 |
| 167184 | 2 | 0 | 0 | 0 | 0 |
| 168169 | 1 | 0 | 0 | 0 | 0 |
| 169170 | 1 | 0 | 0 | 0 | 0 |
| 169171 | 1 | 0 | 0 | 0 | 0 |
| 169172 | 1 | 0 | 0 | 0 | 0 |
| 172173 | 1 | 0 | 0 | 0 | 0 |
| 172186 | 1 | 0 | 0 | 0 | 0 |
| 172190 | 1 | 0 | 0 | 0 | 0 |
| 173174 | 1 | 0 | 0 | 0 | 0 |
| 173175 | 1 | 0 | 0 | 0 | 0 |
| 173176 | 1 | 0 | 0 | 0 | 0 |
| 176177 | 1 | 0 | 0 | 0 | 0 |
| 177178 | 1 | 0 | 0 | 0 | 0 |
| 177185 | 2 | 0 | 0 | 0 | 0 |
| 178179 | 1 | 0 | 0 | 0 | 0 |
| 178180 | 1 | 0 | 0 | 0 | 0 |
| 178181 | 1 | 0 | 0 | 0 | 0 |
| 181182 | 1 | 0 | 0 | 0 | 0 |
| 181183 | 1 | 0 | 0 | 0 | 0 |
| 181208 | 1 | 0 | 0 | 0 | 0 |
| 186187 | 1 | 0 | 0 | 0 | 0 |

```

186188 1 0 0 0 0
186189 1 0 0 0 0
190191 1 0 0 0 0
190192 1 0 0 0 0
190193 1 0 0 0 0
194195 1 0 0 0 0
194200 1 0 0 0 0
194202 1 0 0 0 0
195196 1 0 0 0 0
195197 2 0 0 0 0
197198 1 0 0 0 0
197199 1 0 0 0 0
199200 2 0 0 0 0
200201 1 0 0 0 0
202203 1 0 0 0 0
202204 1 0 0 0 0
202205 1 0 0 0 0
205206 1 0 0 0 0
205207 1 0 0 0 0
205208 1 0 0 0 0
208209 1 0 0 0 0
209210 1 0 0 0 0
209211 1 0 0 0 0
209212 1 0 0 0 0
212213 1 0 0 0 0
212214 1 0 0 0 0
212215 1 0 0 0 0
215216 1 0 0 0 0
215233 2 0 0 0 0
216217 1 0 0 0 0
217218 1 0 0 0 0
217219 1 0 0 0 0
217220 1 0 0 0 0
220221 1 0 0 0 0
220235 1 0 0 0 0
220239 1 0 0 0 0
221222 1 0 0 0 0
221223 1 0 0 0 0
221224 1 0 0 0 0
224225 1 0 0 0 0
225226 1 0 0 0 0
225234 2 0 0 0 0
226227 1 0 0 0 0
226228 1 0 0 0 0
226229 1 0 0 0 0
229230 1 0 0 0 0
229231 1 0 0 0 0
229232 1 0 0 0 0
235236 1 0 0 0 0
235237 1 0 0 0 0
235238 1 0 0 0 0
239240 1 0 0 0 0
239241 1 0 0 0 0
239242 1 0 0 0 0

```

```

M END
> <NAME>
F94_1

```

```

$$$$
II28_1
MOE2012 3D

```

```

212211 0 0 1 0 0 0 0 0999 V2000
13.9640 9.2770 -17.6430 O 0 0 0 0 0 0 0 0 0 0 0 0 0 0 0 0
14.7490 8.8800 -18.0590 H 0 0 0 0 0 0 0 0 0 0 0 0 0 0 0 0
13.8240 8.6790 -16.3610 C 0 0 0 0 0 0 0 0 0 0 0 0 0 0 0 0
13.7080 7.5990 -16.4920 H 0 0 0 0 0 0 0 0 0 0 0 0 0 0 0 0
14.7330 8.8740 -15.7840 H 0 0 0 0 0 0 0 0 0 0 0 0 0 0 0 0
12.6050 9.2780 -15.6740 C 0 0 0 0 0 0 0 0 0 0 0 0 0 0 0 0
12.7300 10.3650 -15.5930 H 0 0 0 0 0 0 0 0 0 0 0 0 0 0 0 0
11.7210 9.1250 -16.3060 H 0 0 0 0 0 0 0 0 0 0 0 0 0 0 0 0
12.3760 8.6680 -14.2910 C 0 0 0 0 0 0 0 0 0 0 0 0 0 0 0 0
12.2510 7.5820 -14.3890 H 0 0 0 0 0 0 0 0 0 0 0 0 0 0 0 0
13.2610 8.8370 -13.6640 H 0 0 0 0 0 0 0 0 0 0 0 0 0 0 0 0
11.1420 9.2750 -13.6200 C 0 0 0 0 0 0 0 0 0 0 0 0 0 0 0 0
11.2830 10.3570 -13.5120 H 0 0 0 0 0 0 0 0 0 0 0 0 0 0 0 0
10.2630 9.1090 -14.2550 H 0 0 0 0 0 0 0 0 0 0 0 0 0 0 0 0
10.9370 8.6650 -12.3050 N 0 0 0 3 0 0 0 0 0 0 0 0 0 0 0 0
10.8460 7.6540 -12.4140 H 0 0 0 0 0 0 0 0 0 0 0 0 0 0 0 0
9.7330 9.2000 -11.6620 C 0 0 0 0 0 0 0 0 0 0 0 0 0 0 0 0
9.8020 10.2920 -11.5820 H 0 0 0 0 0 0 0 0 0 0 0 0 0 0 0 0

```

|         |          |          |   |   |   |   |   |   |   |   |   |   |   |   |   |
|---------|----------|----------|---|---|---|---|---|---|---|---|---|---|---|---|---|
| 8.8550  | 8.9640   | -12.2760 | H | 0 | 0 | 0 | 0 | 0 | 0 | 0 | 0 | 0 | 0 | 0 | 0 |
| 9.5400  | 8.5880   | -10.2810 | C | 0 | 0 | 0 | 0 | 0 | 0 | 0 | 0 | 0 | 0 | 0 | 0 |
| 8.5360  | 8.8130   | -9.9020  | H | 0 | 0 | 0 | 0 | 0 | 0 | 0 | 0 | 0 | 0 | 0 | 0 |
| 9.6180  | 7.4940   | -10.3150 | H | 0 | 0 | 0 | 0 | 0 | 0 | 0 | 0 | 0 | 0 | 0 | 0 |
| 10.5230 | 9.1570   | -9.2920  | C | 0 | 0 | 0 | 0 | 0 | 0 | 0 | 0 | 0 | 0 | 0 | 0 |
| 11.3640 | 8.1850   | -8.8400  | O | 0 | 0 | 0 | 0 | 0 | 0 | 0 | 0 | 0 | 0 | 0 | 0 |
| 12.3500 | 8.6330   | -7.8980  | C | 0 | 0 | 0 | 0 | 0 | 0 | 0 | 0 | 0 | 0 | 0 | 0 |
| 12.8830 | 9.5020   | -8.3000  | H | 0 | 0 | 0 | 0 | 0 | 0 | 0 | 0 | 0 | 0 | 0 | 0 |
| 11.8490 | 8.9090   | -6.9630  | H | 0 | 0 | 0 | 0 | 0 | 0 | 0 | 0 | 0 | 0 | 0 | 0 |
| 13.3250 | 7.4900   | -7.6610  | C | 0 | 0 | 0 | 0 | 0 | 0 | 0 | 0 | 0 | 0 | 0 | 0 |
| 12.7850 | 6.5980   | -7.3190  | H | 0 | 0 | 0 | 0 | 0 | 0 | 0 | 0 | 0 | 0 | 0 | 0 |
| 13.7850 | 7.1870   | -8.6110  | H | 0 | 0 | 0 | 0 | 0 | 0 | 0 | 0 | 0 | 0 | 0 | 0 |
| 14.4030 | 7.8630   | -6.6550  | C | 0 | 0 | 0 | 0 | 0 | 0 | 0 | 0 | 0 | 0 | 0 | 0 |
| 14.9680 | 8.7340   | -7.0070  | H | 0 | 0 | 0 | 0 | 0 | 0 | 0 | 0 | 0 | 0 | 0 | 0 |
| 13.9500 | 8.0860   | -5.6820  | H | 0 | 0 | 0 | 0 | 0 | 0 | 0 | 0 | 0 | 0 | 0 | 0 |
| 15.2940 | 6.7450   | -6.5290  | O | 0 | 0 | 0 | 0 | 0 | 0 | 0 | 0 | 0 | 0 | 0 | 0 |
| 16.2760 | 6.8950   | -5.5930  | C | 0 | 0 | 0 | 0 | 0 | 0 | 0 | 0 | 0 | 0 | 0 | 0 |
| 17.1560 | 5.6660   | -5.5830  | C | 0 | 0 | 0 | 0 | 0 | 0 | 0 | 0 | 0 | 0 | 0 | 0 |
| 16.5090 | 4.7810   | -5.5840  | H | 0 | 0 | 0 | 0 | 0 | 0 | 0 | 0 | 0 | 0 | 0 | 0 |
| 17.7460 | 5.6760   | -6.5050  | H | 0 | 0 | 0 | 0 | 0 | 0 | 0 | 0 | 0 | 0 | 0 | 0 |
| 18.0520 | 5.6370   | -4.3400  | C | 0 | 0 | 0 | 0 | 0 | 0 | 0 | 0 | 0 | 0 | 0 | 0 |
| 18.7100 | 6.5170   | -4.3120  | H | 0 | 0 | 0 | 0 | 0 | 0 | 0 | 0 | 0 | 0 | 0 | 0 |
| 17.3910 | 5.7340   | -3.4710  | H | 0 | 0 | 0 | 0 | 0 | 0 | 0 | 0 | 0 | 0 | 0 | 0 |
| 10.5360 | 10.3280  | -8.9340  | O | 0 | 0 | 0 | 0 | 0 | 0 | 0 | 0 | 0 | 0 | 0 | 0 |
| 16.4340 | 7.8840   | -4.8900  | O | 0 | 0 | 0 | 0 | 0 | 0 | 0 | 0 | 0 | 0 | 0 | 0 |
| 18.0620 | 2.1210   | 1.4700   | O | 0 | 0 | 0 | 0 | 0 | 0 | 0 | 0 | 0 | 0 | 0 | 0 |
| 17.3330 | 1.7660   | 2.0080   | H | 0 | 0 | 0 | 0 | 0 | 0 | 0 | 0 | 0 | 0 | 0 | 0 |
| 17.5030 | 2.5430   | 0.2330   | C | 0 | 0 | 0 | 0 | 0 | 0 | 0 | 0 | 0 | 0 | 0 | 0 |
| 17.0460 | 1.6770   | -0.2550  | H | 0 | 0 | 0 | 0 | 0 | 0 | 0 | 0 | 0 | 0 | 0 | 0 |
| 16.7280 | 3.2900   | 0.4350   | H | 0 | 0 | 0 | 0 | 0 | 0 | 0 | 0 | 0 | 0 | 0 | 0 |
| 18.6140 | 3.1300   | -0.6260  | C | 0 | 0 | 0 | 0 | 0 | 0 | 0 | 0 | 0 | 0 | 0 | 0 |
| 19.0640 | 3.9840   | -0.1040  | H | 0 | 0 | 0 | 0 | 0 | 0 | 0 | 0 | 0 | 0 | 0 | 0 |
| 19.4150 | 2.3880   | -0.7320  | H | 0 | 0 | 0 | 0 | 0 | 0 | 0 | 0 | 0 | 0 | 0 | 0 |
| 18.1060 | 3.5610   | -2.0030  | C | 0 | 0 | 0 | 0 | 0 | 0 | 0 | 0 | 0 | 0 | 0 | 0 |
| 17.6630 | 2.6950   | -2.5120  | H | 0 | 0 | 0 | 0 | 0 | 0 | 0 | 0 | 0 | 0 | 0 | 0 |
| 17.3110 | 4.3030   | -1.8750  | H | 0 | 0 | 0 | 0 | 0 | 0 | 0 | 0 | 0 | 0 | 0 | 0 |
| 19.2550 | 4.1230   | -2.8550  | C | 0 | 0 | 0 | 0 | 0 | 0 | 0 | 0 | 0 | 0 | 0 | 0 |
| 19.6760 | 5.0260   | -2.3920  | H | 0 | 0 | 0 | 0 | 0 | 0 | 0 | 0 | 0 | 0 | 0 | 0 |
| 20.0440 | 3.3650   | -2.8330  | H | 0 | 0 | 0 | 0 | 0 | 0 | 0 | 0 | 0 | 0 | 0 | 0 |
| 18.8440 | 4.3870   | -4.2510  | N | 0 | 0 | 3 | 0 | 0 | 0 | 0 | 0 | 0 | 0 | 0 | 0 |
| 20.0340 | 4.4580   | -5.1380  | C | 0 | 0 | 0 | 0 | 0 | 0 | 0 | 0 | 0 | 0 | 0 | 0 |
| 19.7030 | 4.7910   | -6.1290  | H | 0 | 0 | 0 | 0 | 0 | 0 | 0 | 0 | 0 | 0 | 0 | 0 |
| 20.7380 | 5.2200   | -4.7810  | H | 0 | 0 | 0 | 0 | 0 | 0 | 0 | 0 | 0 | 0 | 0 | 0 |
| 20.7150 | 3.0980   | -5.3700  | C | 0 | 0 | 0 | 0 | 0 | 0 | 0 | 0 | 0 | 0 | 0 | 0 |
| 20.0220 | 2.2760   | -5.1580  | H | 0 | 0 | 0 | 0 | 0 | 0 | 0 | 0 | 0 | 0 | 0 | 0 |
| 21.0070 | 3.0260   | -6.4260  | H | 0 | 0 | 0 | 0 | 0 | 0 | 0 | 0 | 0 | 0 | 0 | 0 |
| 21.9800 | 2.9060   | -4.5630  | C | 0 | 0 | 0 | 0 | 0 | 0 | 0 | 0 | 0 | 0 | 0 | 0 |
| 22.3950 | 1.6080   | -4.6640  | O | 0 | 0 | 0 | 0 | 0 | 0 | 0 | 0 | 0 | 0 | 0 | 0 |
| 23.5910 | 1.3000   | -3.9320  | C | 0 | 0 | 0 | 0 | 0 | 0 | 0 | 0 | 0 | 0 | 0 | 0 |
| 24.4150 | 1.9210   | -4.3040  | H | 0 | 0 | 0 | 0 | 0 | 0 | 0 | 0 | 0 | 0 | 0 | 0 |
| 23.4280 | 1.5060   | -2.8680  | H | 0 | 0 | 0 | 0 | 0 | 0 | 0 | 0 | 0 | 0 | 0 | 0 |
| 23.9090 | -0.1730  | -4.1390  | C | 0 | 0 | 0 | 0 | 0 | 0 | 0 | 0 | 0 | 0 | 0 | 0 |
| 23.0540 | -0.7900  | -3.8350  | H | 0 | 0 | 0 | 0 | 0 | 0 | 0 | 0 | 0 | 0 | 0 | 0 |
| 24.0360 | -0.3830  | -5.2090  | H | 0 | 0 | 0 | 0 | 0 | 0 | 0 | 0 | 0 | 0 | 0 | 0 |
| 25.1540 | -0.5960  | -3.3720  | C | 0 | 0 | 0 | 0 | 0 | 0 | 0 | 0 | 0 | 0 | 0 | 0 |
| 26.0170 | -0.0040  | -3.6960  | H | 0 | 0 | 0 | 0 | 0 | 0 | 0 | 0 | 0 | 0 | 0 | 0 |
| 24.9990 | -0.4610  | -2.2950  | H | 0 | 0 | 0 | 0 | 0 | 0 | 0 | 0 | 0 | 0 | 0 | 0 |
| 25.3990 | -1.9840  | -3.6480  | O | 0 | 0 | 0 | 0 | 0 | 0 | 0 | 0 | 0 | 0 | 0 | 0 |
| 26.5030 | -2.5020  | -3.0360  | C | 0 | 0 | 0 | 0 | 0 | 0 | 0 | 0 | 0 | 0 | 0 | 0 |
| 26.6530 | -3.9540  | -3.4130  | C | 0 | 0 | 0 | 0 | 0 | 0 | 0 | 0 | 0 | 0 | 0 | 0 |
| 25.7800 | -4.4880  | -3.0260  | H | 0 | 0 | 0 | 0 | 0 | 0 | 0 | 0 | 0 | 0 | 0 | 0 |
| 26.6610 | -4.0260  | -4.5070  | H | 0 | 0 | 0 | 0 | 0 | 0 | 0 | 0 | 0 | 0 | 0 | 0 |
| 27.9580 | -4.5280  | -2.8500  | C | 0 | 0 | 0 | 0 | 0 | 0 | 0 | 0 | 0 | 0 | 0 | 0 |
| 28.7740 | -3.8990  | -3.2250  | H | 0 | 0 | 0 | 0 | 0 | 0 | 0 | 0 | 0 | 0 | 0 | 0 |
| 27.9870 | -4.4380  | -1.7560  | H | 0 | 0 | 0 | 0 | 0 | 0 | 0 | 0 | 0 | 0 | 0 | 0 |
| 22.5580 | 3.7780   | -3.9290  | O | 0 | 0 | 0 | 0 | 0 | 0 | 0 | 0 | 0 | 0 | 0 | 0 |
| 27.2520 | -1.8830  | -2.2940  | O | 0 | 0 | 0 | 0 | 0 | 0 | 0 | 0 | 0 | 0 | 0 | 0 |
| 25.1170 | -11.2190 | -2.2380  | O | 0 | 0 | 0 | 0 | 0 | 0 | 0 | 0 | 0 | 0 | 0 | 0 |
| 24.9580 | -12.0490 | -2.7200  | H | 0 | 0 | 0 | 0 | 0 | 0 | 0 | 0 | 0 | 0 | 0 | 0 |
| 25.9080 | -10.3910 | -3.0780  | C | 0 | 0 | 0 | 0 | 0 | 0 | 0 | 0 | 0 | 0 | 0 | 0 |
| 26.8360 | -10.9210 | -3.3160  | H | 0 | 0 | 0 | 0 | 0 | 0 | 0 | 0 | 0 | 0 | 0 | 0 |
| 25.3560 | -10.2050 | -4.0050  | H | 0 | 0 | 0 | 0 | 0 | 0 | 0 | 0 | 0 | 0 | 0 | 0 |
| 26.1960 | -9.0900  | -2.3460  | C | 0 | 0 | 0 | 0 | 0 | 0 | 0 | 0 | 0 | 0 | 0 | 0 |
| 25.2490 | -8.6020  | -2.0850  | H | 0 | 0 | 0 | 0 | 0 | 0 | 0 | 0 | 0 | 0 | 0 | 0 |
| 26.6920 | -9.3120  | -1.3920  | H | 0 | 0 | 0 | 0 | 0 | 0 | 0 | 0 | 0 | 0 | 0 | 0 |
| 27.0630 | -8.1570  | -3.1870  | C | 0 | 0 | 0 | 0 | 0 | 0 | 0 | 0 | 0 | 0 | 0 | 0 |
| 27.9950 | -8.6720  | -3.4430  | H | 0 | 0 | 0 | 0 | 0 | 0 | 0 | 0 | 0 | 0 | 0 | 0 |
| 26.5500 | -7.9350  | -4.1320  | H | 0 | 0 | 0 | 0 | 0 | 0 | 0 | 0 | 0 | 0 | 0 | 0 |
| 27.3460 | -6.8470  | -2.4400  | C | 0 | 0 | 0 | 0 | 0 | 0 | 0 | 0 | 0 | 0 | 0 | 0 |
| 26.3740 | -6.3980  | -2.2060  | H | 0 | 0 | 0 | 0 | 0 | 0 | 0 | 0 | 0 | 0 | 0 | 0 |
| 27.8320 | -7.0420  | -1.4750  | H | 0 | 0 | 0 | 0 | 0 | 0 | 0 | 0 | 0 | 0 | 0 | 0 |

|         |         |         |   |   |   |   |   |   |   |   |   |   |   |   |
|---------|---------|---------|---|---|---|---|---|---|---|---|---|---|---|---|
| 28.1600 | -5.9320 | -3.2670 | N | 0 | 0 | 3 | 0 | 0 | 0 | 0 | 0 | 0 | 0 | 0 |
| 29.5910 | -6.2990 | -3.1840 | C | 0 | 0 | 0 | 0 | 0 | 0 | 0 | 0 | 0 | 0 | 0 |
| 30.0450 | -5.9070 | -2.2640 | H | 0 | 0 | 0 | 0 | 0 | 0 | 0 | 0 | 0 | 0 | 0 |
| 29.7090 | -7.3880 | -3.1260 | H | 0 | 0 | 0 | 0 | 0 | 0 | 0 | 0 | 0 | 0 | 0 |
| 30.3630 | -5.8280 | -4.4140 | C | 0 | 0 | 0 | 0 | 0 | 0 | 0 | 0 | 0 | 0 | 0 |
| 29.9430 | -6.2500 | -5.3350 | H | 0 | 0 | 0 | 0 | 0 | 0 | 0 | 0 | 0 | 0 | 0 |
| 30.3340 | -4.7390 | -4.5260 | H | 0 | 0 | 0 | 0 | 0 | 0 | 0 | 0 | 0 | 0 | 0 |
| 31.7970 | -6.2810 | -4.3150 | C | 0 | 0 | 0 | 0 | 0 | 0 | 0 | 0 | 0 | 0 | 0 |
| 32.6170 | -5.2150 | -4.0930 | O | 0 | 0 | 0 | 0 | 0 | 0 | 0 | 0 | 0 | 0 | 0 |
| 34.0120 | -5.5410 | -4.0140 | C | 0 | 0 | 0 | 0 | 0 | 0 | 0 | 0 | 0 | 0 | 0 |
| 34.1760 | -6.2480 | -3.1920 | H | 0 | 0 | 0 | 0 | 0 | 0 | 0 | 0 | 0 | 0 | 0 |
| 34.3290 | -5.9980 | -4.9590 | H | 0 | 0 | 0 | 0 | 0 | 0 | 0 | 0 | 0 | 0 | 0 |
| 34.7940 | -4.2590 | -3.7640 | C | 0 | 0 | 0 | 0 | 0 | 0 | 0 | 0 | 0 | 0 | 0 |
| 34.5600 | -3.5160 | -4.5370 | H | 0 | 0 | 0 | 0 | 0 | 0 | 0 | 0 | 0 | 0 | 0 |
| 34.4660 | -3.7960 | -2.8250 | H | 0 | 0 | 0 | 0 | 0 | 0 | 0 | 0 | 0 | 0 | 0 |
| 36.2940 | -4.5170 | -3.7270 | C | 0 | 0 | 0 | 0 | 0 | 0 | 0 | 0 | 0 | 0 | 0 |
| 36.5350 | -5.2350 | -2.9340 | H | 0 | 0 | 0 | 0 | 0 | 0 | 0 | 0 | 0 | 0 | 0 |
| 36.6300 | -4.9110 | -4.6930 | H | 0 | 0 | 0 | 0 | 0 | 0 | 0 | 0 | 0 | 0 | 0 |
| 36.9630 | -3.2760 | -3.4550 | O | 0 | 0 | 0 | 0 | 0 | 0 | 0 | 0 | 0 | 0 | 0 |
| 38.3260 | -3.3520 | -3.4670 | C | 0 | 0 | 0 | 0 | 0 | 0 | 0 | 0 | 0 | 0 | 0 |
| 38.9060 | -1.9960 | -3.1540 | C | 0 | 0 | 0 | 0 | 0 | 0 | 0 | 0 | 0 | 0 | 0 |
| 38.5510 | -1.3110 | -3.9300 | H | 0 | 0 | 0 | 0 | 0 | 0 | 0 | 0 | 0 | 0 | 0 |
| 38.5200 | -1.6760 | -2.1800 | H | 0 | 0 | 0 | 0 | 0 | 0 | 0 | 0 | 0 | 0 | 0 |
| 40.4370 | -2.0520 | -3.1160 | C | 0 | 0 | 0 | 0 | 0 | 0 | 0 | 0 | 0 | 0 | 0 |
| 40.7060 | -2.8640 | -2.4270 | H | 0 | 0 | 0 | 0 | 0 | 0 | 0 | 0 | 0 | 0 | 0 |
| 40.8330 | -2.3310 | -4.1020 | H | 0 | 0 | 0 | 0 | 0 | 0 | 0 | 0 | 0 | 0 | 0 |
| 32.1580 | -7.4470 | -4.4070 | O | 0 | 0 | 0 | 0 | 0 | 0 | 0 | 0 | 0 | 0 | 0 |
| 38.9720 | -4.3630 | -3.7030 | O | 0 | 0 | 0 | 0 | 0 | 0 | 0 | 0 | 0 | 0 | 0 |
| 44.2630 | 3.8790  | -3.1010 | O | 0 | 0 | 0 | 0 | 0 | 0 | 0 | 0 | 0 | 0 | 0 |
| 44.4820 | 4.6700  | -2.5790 | H | 0 | 0 | 0 | 0 | 0 | 0 | 0 | 0 | 0 | 0 | 0 |
| 42.9400 | 3.5020  | -2.7470 | C | 0 | 0 | 0 | 0 | 0 | 0 | 0 | 0 | 0 | 0 | 0 |
| 42.8830 | 3.4090  | -1.6580 | H | 0 | 0 | 0 | 0 | 0 | 0 | 0 | 0 | 0 | 0 | 0 |
| 42.2530 | 4.2870  | -3.0770 | H | 0 | 0 | 0 | 0 | 0 | 0 | 0 | 0 | 0 | 0 | 0 |
| 42.6210 | 2.1750  | -3.4190 | C | 0 | 0 | 0 | 0 | 0 | 0 | 0 | 0 | 0 | 0 | 0 |
| 42.7440 | 2.2750  | -4.5050 | H | 0 | 0 | 0 | 0 | 0 | 0 | 0 | 0 | 0 | 0 | 0 |
| 43.3720 | 1.4450  | -3.1100 | H | 0 | 0 | 0 | 0 | 0 | 0 | 0 | 0 | 0 | 0 | 0 |
| 41.2010 | 1.7130  | -3.1000 | C | 0 | 0 | 0 | 0 | 0 | 0 | 0 | 0 | 0 | 0 | 0 |
| 40.9890 | 1.7870  | -2.0270 | H | 0 | 0 | 0 | 0 | 0 | 0 | 0 | 0 | 0 | 0 | 0 |
| 40.5100 | 2.4190  | -3.5800 | H | 0 | 0 | 0 | 0 | 0 | 0 | 0 | 0 | 0 | 0 | 0 |
| 40.8680 | 0.3010  | -3.6120 | C | 0 | 0 | 0 | 0 | 0 | 0 | 0 | 0 | 0 | 0 | 0 |
| 39.8050 | 0.3510  | -3.8670 | H | 0 | 0 | 0 | 0 | 0 | 0 | 0 | 0 | 0 | 0 | 0 |
| 41.3950 | 0.0940  | -4.5520 | H | 0 | 0 | 0 | 0 | 0 | 0 | 0 | 0 | 0 | 0 | 0 |
| 41.0660 | -0.7980 | -2.6360 | N | 0 | 0 | 3 | 0 | 0 | 0 | 0 | 0 | 0 | 0 | 0 |
| 42.4980 | -1.0430 | -2.3490 | C | 0 | 0 | 0 | 0 | 0 | 0 | 0 | 0 | 0 | 0 | 0 |
| 42.7020 | -2.1180 | -2.2510 | H | 0 | 0 | 0 | 0 | 0 | 0 | 0 | 0 | 0 | 0 | 0 |
| 43.1340 | -0.7260 | -3.1850 | H | 0 | 0 | 0 | 0 | 0 | 0 | 0 | 0 | 0 | 0 | 0 |
| 42.9160 | -0.4050 | -1.0220 | C | 0 | 0 | 0 | 0 | 0 | 0 | 0 | 0 | 0 | 0 | 0 |
| 42.5410 | 0.6180  | -0.9430 | H | 0 | 0 | 0 | 0 | 0 | 0 | 0 | 0 | 0 | 0 | 0 |
| 42.5170 | -0.9720 | -0.1750 | H | 0 | 0 | 0 | 0 | 0 | 0 | 0 | 0 | 0 | 0 | 0 |
| 44.4200 | -0.3630 | -0.9040 | C | 0 | 0 | 0 | 0 | 0 | 0 | 0 | 0 | 0 | 0 | 0 |
| 44.7920 | 0.7230  | -0.1650 | O | 0 | 0 | 0 | 0 | 0 | 0 | 0 | 0 | 0 | 0 | 0 |
| 46.2080 | 0.9090  | -0.0210 | C | 0 | 0 | 0 | 0 | 0 | 0 | 0 | 0 | 0 | 0 | 0 |
| 46.6170 | 0.0890  | 0.5810  | H | 0 | 0 | 0 | 0 | 0 | 0 | 0 | 0 | 0 | 0 | 0 |
| 46.6840 | 0.9150  | -1.0080 | H | 0 | 0 | 0 | 0 | 0 | 0 | 0 | 0 | 0 | 0 | 0 |
| 46.4300 | 2.2430  | 0.6760  | C | 0 | 0 | 0 | 0 | 0 | 0 | 0 | 0 | 0 | 0 | 0 |
| 45.9640 | 3.0510  | 0.0980  | H | 0 | 0 | 0 | 0 | 0 | 0 | 0 | 0 | 0 | 0 | 0 |
| 45.9020 | 2.2530  | 1.6380  | H | 0 | 0 | 0 | 0 | 0 | 0 | 0 | 0 | 0 | 0 | 0 |
| 47.9070 | 2.5410  | 0.8880  | C | 0 | 0 | 0 | 0 | 0 | 0 | 0 | 0 | 0 | 0 | 0 |
| 48.3680 | 1.7460  | 1.4870  | H | 0 | 0 | 0 | 0 | 0 | 0 | 0 | 0 | 0 | 0 | 0 |
| 48.4230 | 2.6210  | -0.0760 | H | 0 | 0 | 0 | 0 | 0 | 0 | 0 | 0 | 0 | 0 | 0 |
| 48.0100 | 3.7910  | 1.5830  | O | 0 | 0 | 0 | 0 | 0 | 0 | 0 | 0 | 0 | 0 | 0 |
| 49.2690 | 4.1200  | 1.9870  | C | 0 | 0 | 0 | 0 | 0 | 0 | 0 | 0 | 0 | 0 | 0 |
| 49.2410 | 5.3730  | 2.8250  | C | 0 | 0 | 0 | 0 | 0 | 0 | 0 | 0 | 0 | 0 | 0 |
| 50.0010 | 6.0560  | 2.4290  | H | 0 | 0 | 0 | 0 | 0 | 0 | 0 | 0 | 0 | 0 | 0 |
| 48.2810 | 5.8850  | 2.7000  | H | 0 | 0 | 0 | 0 | 0 | 0 | 0 | 0 | 0 | 0 | 0 |
| 49.5300 | 5.0460  | 4.2910  | C | 0 | 0 | 0 | 0 | 0 | 0 | 0 | 0 | 0 | 0 | 0 |
| 49.4950 | 5.9610  | 4.8960  | H | 0 | 0 | 0 | 0 | 0 | 0 | 0 | 0 | 0 | 0 | 0 |
| 50.5660 | 4.6890  | 4.3390  | H | 0 | 0 | 0 | 0 | 0 | 0 | 0 | 0 | 0 | 0 | 0 |
| 45.1860 | -1.1860 | -1.3850 | O | 0 | 0 | 0 | 0 | 0 | 0 | 0 | 0 | 0 | 0 | 0 |
| 50.2840 | 3.4860  | 1.7320  | O | 0 | 0 | 0 | 0 | 0 | 0 | 0 | 0 | 0 | 0 | 0 |
| 43.8660 | 1.8980  | 5.7740  | O | 0 | 0 | 0 | 0 | 0 | 0 | 0 | 0 | 0 | 0 | 0 |
| 43.2220 | 1.2200  | 5.5050  | H | 0 | 0 | 0 | 0 | 0 | 0 | 0 | 0 | 0 | 0 | 0 |
| 43.7360 | 2.9740  | 4.8570  | C | 0 | 0 | 0 | 0 | 0 | 0 | 0 | 0 | 0 | 0 | 0 |
| 43.8360 | 2.5850  | 3.8380  | H | 0 | 0 | 0 | 0 | 0 | 0 | 0 | 0 | 0 | 0 | 0 |
| 42.7370 | 3.4060  | 4.9710  | H | 0 | 0 | 0 | 0 | 0 | 0 | 0 | 0 | 0 | 0 | 0 |
| 44.8000 | 4.0290  | 5.1410  | C | 0 | 0 | 0 | 0 | 0 | 0 | 0 | 0 | 0 | 0 | 0 |
| 44.6400 | 4.8840  | 4.4740  | H | 0 | 0 | 0 | 0 | 0 | 0 | 0 | 0 | 0 | 0 | 0 |
| 44.6960 | 4.3850  | 6.1730  | H | 0 | 0 | 0 | 0 | 0 | 0 | 0 | 0 | 0 | 0 | 0 |
| 46.2150 | 3.4760  | 4.9500  | C | 0 | 0 | 0 | 0 | 0 | 0 | 0 | 0 | 0 | 0 | 0 |
| 46.3860 | 2.6620  | 5.6630  | H | 0 | 0 | 0 | 0 | 0 | 0 | 0 | 0 | 0 | 0 | 0 |
| 46.2990 | 3.0430  | 3.9460  | H | 0 | 0 | 0 | 0 | 0 | 0 | 0 | 0 | 0 | 0 | 0 |

|         |         |        |   |   |   |   |   |   |   |   |   |   |   |   |   |   |
|---------|---------|--------|---|---|---|---|---|---|---|---|---|---|---|---|---|---|
| 47.2770 | 4.5710  | 5.1190 | C | 0 | 0 | 0 | 0 | 0 | 0 | 0 | 0 | 0 | 0 | 0 | 0 | 0 |
| 47.0250 | 5.3770  | 4.4200 | H | 0 | 0 | 0 | 0 | 0 | 0 | 0 | 0 | 0 | 0 | 0 | 0 | 0 |
| 47.2350 | 5.0130  | 6.1230 | H | 0 | 0 | 0 | 0 | 0 | 0 | 0 | 0 | 0 | 0 | 0 | 0 | 0 |
| 48.6150 | 4.0260  | 4.8310 | N | 0 | 0 | 3 | 0 | 0 | 0 | 0 | 0 | 0 | 0 | 0 | 0 | 0 |
| 49.1840 | 3.3360  | 6.0020 | C | 0 | 0 | 0 | 0 | 0 | 0 | 0 | 0 | 0 | 0 | 0 | 0 | 0 |
| 49.6730 | 4.0480  | 6.6810 | H | 0 | 0 | 0 | 0 | 0 | 0 | 0 | 0 | 0 | 0 | 0 | 0 | 0 |
| 48.3910 | 2.8590  | 6.5910 | H | 0 | 0 | 0 | 0 | 0 | 0 | 0 | 0 | 0 | 0 | 0 | 0 | 0 |
| 50.1540 | 2.2360  | 5.5630 | C | 0 | 0 | 0 | 0 | 0 | 0 | 0 | 0 | 0 | 0 | 0 | 0 | 0 |
| 49.6500 | 1.5520  | 4.8700 | H | 0 | 0 | 0 | 0 | 0 | 0 | 0 | 0 | 0 | 0 | 0 | 0 | 0 |
| 51.0350 | 2.6590  | 5.0690 | H | 0 | 0 | 0 | 0 | 0 | 0 | 0 | 0 | 0 | 0 | 0 | 0 | 0 |
| 50.6280 | 1.4340  | 6.7470 | C | 0 | 0 | 0 | 0 | 0 | 0 | 0 | 0 | 0 | 0 | 0 | 0 | 0 |
| 51.4450 | 0.4290  | 6.3180 | O | 0 | 0 | 0 | 0 | 0 | 0 | 0 | 0 | 0 | 0 | 0 | 0 | 0 |
| 51.9680 | -0.4020 | 7.3640 | C | 0 | 0 | 0 | 0 | 0 | 0 | 0 | 0 | 0 | 0 | 0 | 0 | 0 |
| 52.5600 | 0.2110  | 8.0540 | H | 0 | 0 | 0 | 0 | 0 | 0 | 0 | 0 | 0 | 0 | 0 | 0 | 0 |
| 51.1380 | -0.8690 | 7.9080 | H | 0 | 0 | 0 | 0 | 0 | 0 | 0 | 0 | 0 | 0 | 0 | 0 | 0 |
| 52.8440 | -1.4710 | 6.7270 | C | 0 | 0 | 0 | 0 | 0 | 0 | 0 | 0 | 0 | 0 | 0 | 0 | 0 |
| 52.2630 | -2.0470 | 5.9960 | H | 0 | 0 | 0 | 0 | 0 | 0 | 0 | 0 | 0 | 0 | 0 | 0 | 0 |
| 53.6430 | -1.0010 | 6.1390 | H | 0 | 0 | 0 | 0 | 0 | 0 | 0 | 0 | 0 | 0 | 0 | 0 | 0 |
| 53.4410 | -2.4030 | 7.7700 | C | 0 | 0 | 0 | 0 | 0 | 0 | 0 | 0 | 0 | 0 | 0 | 0 | 0 |
| 54.0670 | -1.8350 | 8.4700 | H | 0 | 0 | 0 | 0 | 0 | 0 | 0 | 0 | 0 | 0 | 0 | 0 | 0 |
| 52.6430 | -2.9130 | 8.3230 | H | 0 | 0 | 0 | 0 | 0 | 0 | 0 | 0 | 0 | 0 | 0 | 0 | 0 |
| 54.2490 | -3.3770 | 7.0930 | O | 0 | 0 | 0 | 0 | 0 | 0 | 0 | 0 | 0 | 0 | 0 | 0 | 0 |
| 54.8510 | -4.2850 | 7.9140 | C | 0 | 0 | 0 | 0 | 0 | 0 | 0 | 0 | 0 | 0 | 0 | 0 | 0 |
| 55.6640 | -5.2460 | 7.0800 | C | 0 | 0 | 0 | 0 | 0 | 0 | 0 | 0 | 0 | 0 | 0 | 0 | 0 |
| 54.9940 | -5.7450 | 6.3730 | H | 0 | 0 | 0 | 0 | 0 | 0 | 0 | 0 | 0 | 0 | 0 | 0 | 0 |
| 56.4130 | -4.6730 | 6.5220 | H | 0 | 0 | 0 | 0 | 0 | 0 | 0 | 0 | 0 | 0 | 0 | 0 | 0 |
| 56.3640 | -6.2910 | 7.9320 | C | 0 | 0 | 0 | 0 | 0 | 0 | 0 | 0 | 0 | 0 | 0 | 0 | 0 |
| 57.0470 | -5.8220 | 8.6480 | H | 0 | 0 | 0 | 0 | 0 | 0 | 0 | 0 | 0 | 0 | 0 | 0 | 0 |
| 56.9440 | -6.9720 | 7.3010 | H | 0 | 0 | 0 | 0 | 0 | 0 | 0 | 0 | 0 | 0 | 0 | 0 | 0 |
| 55.6390 | -6.8840 | 8.5000 | H | 0 | 0 | 0 | 0 | 0 | 0 | 0 | 0 | 0 | 0 | 0 | 0 | 0 |
| 50.3350 | 1.6540  | 7.9130 | O | 0 | 0 | 0 | 0 | 0 | 0 | 0 | 0 | 0 | 0 | 0 | 0 | 0 |
| 54.7470 | -4.3140 | 9.1320 | O | 0 | 0 | 0 | 0 | 0 | 0 | 0 | 0 | 0 | 0 | 0 | 0 | 0 |
| 1 2     | 1 0     | 0 0    | 0 | 0 | 0 | 0 | 0 | 0 | 0 | 0 | 0 | 0 | 0 | 0 | 0 | 0 |
| 1 3     | 1 0     | 0 0    | 0 | 0 | 0 | 0 | 0 | 0 | 0 | 0 | 0 | 0 | 0 | 0 | 0 | 0 |
| 3 4     | 1 0     | 0 0    | 0 | 0 | 0 | 0 | 0 | 0 | 0 | 0 | 0 | 0 | 0 | 0 | 0 | 0 |
| 3 5     | 1 0     | 0 0    | 0 | 0 | 0 | 0 | 0 | 0 | 0 | 0 | 0 | 0 | 0 | 0 | 0 | 0 |
| 3 6     | 1 0     | 0 0    | 0 | 0 | 0 | 0 | 0 | 0 | 0 | 0 | 0 | 0 | 0 | 0 | 0 | 0 |
| 6 7     | 1 0     | 0 0    | 0 | 0 | 0 | 0 | 0 | 0 | 0 | 0 | 0 | 0 | 0 | 0 | 0 | 0 |
| 6 8     | 1 0     | 0 0    | 0 | 0 | 0 | 0 | 0 | 0 | 0 | 0 | 0 | 0 | 0 | 0 | 0 | 0 |
| 6 9     | 1 0     | 0 0    | 0 | 0 | 0 | 0 | 0 | 0 | 0 | 0 | 0 | 0 | 0 | 0 | 0 | 0 |
| 9 10    | 1 0     | 0 0    | 0 | 0 | 0 | 0 | 0 | 0 | 0 | 0 | 0 | 0 | 0 | 0 | 0 | 0 |
| 9 11    | 1 0     | 0 0    | 0 | 0 | 0 | 0 | 0 | 0 | 0 | 0 | 0 | 0 | 0 | 0 | 0 | 0 |
| 9 12    | 1 0     | 0 0    | 0 | 0 | 0 | 0 | 0 | 0 | 0 | 0 | 0 | 0 | 0 | 0 | 0 | 0 |
| 12 13   | 1 0     | 0 0    | 0 | 0 | 0 | 0 | 0 | 0 | 0 | 0 | 0 | 0 | 0 | 0 | 0 | 0 |
| 12 14   | 1 0     | 0 0    | 0 | 0 | 0 | 0 | 0 | 0 | 0 | 0 | 0 | 0 | 0 | 0 | 0 | 0 |
| 12 15   | 1 0     | 0 0    | 0 | 0 | 0 | 0 | 0 | 0 | 0 | 0 | 0 | 0 | 0 | 0 | 0 | 0 |
| 15 16   | 1 0     | 0 0    | 0 | 0 | 0 | 0 | 0 | 0 | 0 | 0 | 0 | 0 | 0 | 0 | 0 | 0 |
| 15 17   | 1 0     | 0 0    | 0 | 0 | 0 | 0 | 0 | 0 | 0 | 0 | 0 | 0 | 0 | 0 | 0 | 0 |
| 17 18   | 1 0     | 0 0    | 0 | 0 | 0 | 0 | 0 | 0 | 0 | 0 | 0 | 0 | 0 | 0 | 0 | 0 |
| 17 19   | 1 0     | 0 0    | 0 | 0 | 0 | 0 | 0 | 0 | 0 | 0 | 0 | 0 | 0 | 0 | 0 | 0 |
| 17 20   | 1 0     | 0 0    | 0 | 0 | 0 | 0 | 0 | 0 | 0 | 0 | 0 | 0 | 0 | 0 | 0 | 0 |
| 20 21   | 1 0     | 0 0    | 0 | 0 | 0 | 0 | 0 | 0 | 0 | 0 | 0 | 0 | 0 | 0 | 0 | 0 |
| 20 22   | 1 0     | 0 0    | 0 | 0 | 0 | 0 | 0 | 0 | 0 | 0 | 0 | 0 | 0 | 0 | 0 | 0 |
| 20 23   | 1 0     | 0 0    | 0 | 0 | 0 | 0 | 0 | 0 | 0 | 0 | 0 | 0 | 0 | 0 | 0 | 0 |
| 23 24   | 1 0     | 0 0    | 0 | 0 | 0 | 0 | 0 | 0 | 0 | 0 | 0 | 0 | 0 | 0 | 0 | 0 |
| 23 42   | 2 0     | 0 0    | 0 | 0 | 0 | 0 | 0 | 0 | 0 | 0 | 0 | 0 | 0 | 0 | 0 | 0 |
| 24 25   | 1 0     | 0 0    | 0 | 0 | 0 | 0 | 0 | 0 | 0 | 0 | 0 | 0 | 0 | 0 | 0 | 0 |
| 25 26   | 1 0     | 0 0    | 0 | 0 | 0 | 0 | 0 | 0 | 0 | 0 | 0 | 0 | 0 | 0 | 0 | 0 |
| 25 27   | 1 0     | 0 0    | 0 | 0 | 0 | 0 | 0 | 0 | 0 | 0 | 0 | 0 | 0 | 0 | 0 | 0 |
| 25 28   | 1 0     | 0 0    | 0 | 0 | 0 | 0 | 0 | 0 | 0 | 0 | 0 | 0 | 0 | 0 | 0 | 0 |
| 28 29   | 1 0     | 0 0    | 0 | 0 | 0 | 0 | 0 | 0 | 0 | 0 | 0 | 0 | 0 | 0 | 0 | 0 |
| 28 30   | 1 0     | 0 0    | 0 | 0 | 0 | 0 | 0 | 0 | 0 | 0 | 0 | 0 | 0 | 0 | 0 | 0 |
| 28 31   | 1 0     | 0 0    | 0 | 0 | 0 | 0 | 0 | 0 | 0 | 0 | 0 | 0 | 0 | 0 | 0 | 0 |
| 31 32   | 1 0     | 0 0    | 0 | 0 | 0 | 0 | 0 | 0 | 0 | 0 | 0 | 0 | 0 | 0 | 0 | 0 |
| 31 33   | 1 0     | 0 0    | 0 | 0 | 0 | 0 | 0 | 0 | 0 | 0 | 0 | 0 | 0 | 0 | 0 | 0 |
| 31 34   | 1 0     | 0 0    | 0 | 0 | 0 | 0 | 0 | 0 | 0 | 0 | 0 | 0 | 0 | 0 | 0 | 0 |
| 34 35   | 1 0     | 0 0    | 0 | 0 | 0 | 0 | 0 | 0 | 0 | 0 | 0 | 0 | 0 | 0 | 0 | 0 |
| 35 36   | 1 0     | 0 0    | 0 | 0 | 0 | 0 | 0 | 0 | 0 | 0 | 0 | 0 | 0 | 0 | 0 | 0 |
| 35 43   | 2 0     | 0 0    | 0 | 0 | 0 | 0 | 0 | 0 | 0 | 0 | 0 | 0 | 0 | 0 | 0 | 0 |
| 36 37   | 1 0     | 0 0    | 0 | 0 | 0 | 0 | 0 | 0 | 0 | 0 | 0 | 0 | 0 | 0 | 0 | 0 |
| 36 38   | 1 0     | 0 0    | 0 | 0 | 0 | 0 | 0 | 0 | 0 | 0 | 0 | 0 | 0 | 0 | 0 | 0 |
| 36 39   | 1 0     | 0 0    | 0 | 0 | 0 | 0 | 0 | 0 | 0 | 0 | 0 | 0 | 0 | 0 | 0 | 0 |
| 39 40   | 1 0     | 0 0    | 0 | 0 | 0 | 0 | 0 | 0 | 0 | 0 | 0 | 0 | 0 | 0 | 0 | 0 |
| 39 41   | 1 0     | 0 0    | 0 | 0 | 0 | 0 | 0 | 0 | 0 | 0 | 0 | 0 | 0 | 0 | 0 | 0 |
| 39 58   | 1 0     | 0 0    | 0 | 0 | 0 | 0 | 0 | 0 | 0 | 0 | 0 | 0 | 0 | 0 | 0 | 0 |
| 44 45   | 1 0     | 0 0    | 0 | 0 | 0 | 0 | 0 | 0 | 0 | 0 | 0 | 0 | 0 | 0 | 0 | 0 |
| 44 46   | 1 0     | 0 0    | 0 | 0 | 0 | 0 | 0 | 0 | 0 | 0 | 0 | 0 | 0 | 0 | 0 | 0 |
| 46 47   | 1 0     | 0 0    | 0 | 0 | 0 | 0 | 0 | 0 | 0 | 0 | 0 | 0 | 0 | 0 | 0 | 0 |
| 46 48   | 1 0     | 0 0    | 0 | 0 | 0 | 0 | 0 | 0 | 0 | 0 | 0 | 0 | 0 | 0 | 0 | 0 |
| 46 49   | 1 0     | 0 0    | 0 | 0 | 0 | 0 | 0 | 0 | 0 | 0 | 0 | 0 | 0 | 0 | 0 | 0 |
| 49 50   | 1 0     | 0 0    | 0 | 0 | 0 | 0 | 0 | 0 | 0 | 0 | 0 | 0 | 0 | 0 | 0 | 0 |



|     |     |   |   |   |   |   |
|-----|-----|---|---|---|---|---|
| 49  | 51  | 1 | 0 | 0 | 0 | 0 |
| 49  | 52  | 1 | 0 | 0 | 0 | 0 |
| 52  | 53  | 1 | 0 | 0 | 0 | 0 |
| 52  | 54  | 1 | 0 | 0 | 0 | 0 |
| 52  | 55  | 1 | 0 | 0 | 0 | 0 |
| 55  | 56  | 1 | 0 | 0 | 0 | 0 |
| 55  | 57  | 1 | 0 | 0 | 0 | 0 |
| 55  | 58  | 1 | 0 | 0 | 0 | 0 |
| 58  | 59  | 1 | 0 | 0 | 0 | 0 |
| 59  | 60  | 1 | 0 | 0 | 0 | 0 |
| 59  | 61  | 1 | 0 | 0 | 0 | 0 |
| 59  | 62  | 1 | 0 | 0 | 0 | 0 |
| 62  | 63  | 1 | 0 | 0 | 0 | 0 |
| 62  | 64  | 1 | 0 | 0 | 0 | 0 |
| 62  | 65  | 1 | 0 | 0 | 0 | 0 |
| 65  | 66  | 1 | 0 | 0 | 0 | 0 |
| 65  | 84  | 2 | 0 | 0 | 0 | 0 |
| 66  | 67  | 1 | 0 | 0 | 0 | 0 |
| 67  | 68  | 1 | 0 | 0 | 0 | 0 |
| 67  | 69  | 1 | 0 | 0 | 0 | 0 |
| 67  | 70  | 1 | 0 | 0 | 0 | 0 |
| 70  | 71  | 1 | 0 | 0 | 0 | 0 |
| 70  | 72  | 1 | 0 | 0 | 0 | 0 |
| 70  | 73  | 1 | 0 | 0 | 0 | 0 |
| 73  | 74  | 1 | 0 | 0 | 0 | 0 |
| 73  | 75  | 1 | 0 | 0 | 0 | 0 |
| 73  | 76  | 1 | 0 | 0 | 0 | 0 |
| 76  | 77  | 1 | 0 | 0 | 0 | 0 |
| 77  | 78  | 1 | 0 | 0 | 0 | 0 |
| 77  | 85  | 2 | 0 | 0 | 0 | 0 |
| 78  | 79  | 1 | 0 | 0 | 0 | 0 |
| 78  | 80  | 1 | 0 | 0 | 0 | 0 |
| 78  | 81  | 1 | 0 | 0 | 0 | 0 |
| 81  | 82  | 1 | 0 | 0 | 0 | 0 |
| 81  | 83  | 1 | 0 | 0 | 0 | 0 |
| 81  | 100 | 1 | 0 | 0 | 0 | 0 |
| 86  | 87  | 1 | 0 | 0 | 0 | 0 |
| 86  | 88  | 1 | 0 | 0 | 0 | 0 |
| 88  | 89  | 1 | 0 | 0 | 0 | 0 |
| 88  | 90  | 1 | 0 | 0 | 0 | 0 |
| 88  | 91  | 1 | 0 | 0 | 0 | 0 |
| 91  | 92  | 1 | 0 | 0 | 0 | 0 |
| 91  | 93  | 1 | 0 | 0 | 0 | 0 |
| 91  | 94  | 1 | 0 | 0 | 0 | 0 |
| 94  | 95  | 1 | 0 | 0 | 0 | 0 |
| 94  | 96  | 1 | 0 | 0 | 0 | 0 |
| 94  | 97  | 1 | 0 | 0 | 0 | 0 |
| 97  | 98  | 1 | 0 | 0 | 0 | 0 |
| 97  | 99  | 1 | 0 | 0 | 0 | 0 |
| 97  | 100 | 1 | 0 | 0 | 0 | 0 |
| 100 | 101 | 1 | 0 | 0 | 0 | 0 |
| 101 | 102 | 1 | 0 | 0 | 0 | 0 |
| 101 | 103 | 1 | 0 | 0 | 0 | 0 |
| 101 | 104 | 1 | 0 | 0 | 0 | 0 |
| 104 | 105 | 1 | 0 | 0 | 0 | 0 |
| 104 | 106 | 1 | 0 | 0 | 0 | 0 |
| 104 | 107 | 1 | 0 | 0 | 0 | 0 |
| 107 | 108 | 1 | 0 | 0 | 0 | 0 |
| 107 | 126 | 2 | 0 | 0 | 0 | 0 |
| 108 | 109 | 1 | 0 | 0 | 0 | 0 |
| 109 | 110 | 1 | 0 | 0 | 0 | 0 |
| 109 | 111 | 1 | 0 | 0 | 0 | 0 |
| 109 | 112 | 1 | 0 | 0 | 0 | 0 |
| 112 | 113 | 1 | 0 | 0 | 0 | 0 |
| 112 | 114 | 1 | 0 | 0 | 0 | 0 |
| 112 | 115 | 1 | 0 | 0 | 0 | 0 |
| 115 | 116 | 1 | 0 | 0 | 0 | 0 |
| 115 | 117 | 1 | 0 | 0 | 0 | 0 |
| 115 | 118 | 1 | 0 | 0 | 0 | 0 |
| 118 | 119 | 1 | 0 | 0 | 0 | 0 |
| 119 | 120 | 1 | 0 | 0 | 0 | 0 |
| 119 | 127 | 2 | 0 | 0 | 0 | 0 |
| 120 | 121 | 1 | 0 | 0 | 0 | 0 |
| 120 | 122 | 1 | 0 | 0 | 0 | 0 |
| 120 | 123 | 1 | 0 | 0 | 0 | 0 |
| 123 | 124 | 1 | 0 | 0 | 0 | 0 |
| 123 | 125 | 1 | 0 | 0 | 0 | 0 |
| 123 | 142 | 1 | 0 | 0 | 0 | 0 |
| 128 | 129 | 1 | 0 | 0 | 0 | 0 |
| 128 | 130 | 1 | 0 | 0 | 0 | 0 |
| 130 | 131 | 1 | 0 | 0 | 0 | 0 |

|        |   |   |   |   |   |
|--------|---|---|---|---|---|
| 130132 | 1 | 0 | 0 | 0 | 0 |
| 130133 | 1 | 0 | 0 | 0 | 0 |
| 133134 | 1 | 0 | 0 | 0 | 0 |
| 133135 | 1 | 0 | 0 | 0 | 0 |
| 133136 | 1 | 0 | 0 | 0 | 0 |
| 136137 | 1 | 0 | 0 | 0 | 0 |
| 136138 | 1 | 0 | 0 | 0 | 0 |
| 136139 | 1 | 0 | 0 | 0 | 0 |
| 139140 | 1 | 0 | 0 | 0 | 0 |
| 139141 | 1 | 0 | 0 | 0 | 0 |
| 139142 | 1 | 0 | 0 | 0 | 0 |
| 142143 | 1 | 0 | 0 | 0 | 0 |
| 143144 | 1 | 0 | 0 | 0 | 0 |
| 143145 | 1 | 0 | 0 | 0 | 0 |
| 143146 | 1 | 0 | 0 | 0 | 0 |
| 146147 | 1 | 0 | 0 | 0 | 0 |
| 146148 | 1 | 0 | 0 | 0 | 0 |
| 146149 | 1 | 0 | 0 | 0 | 0 |
| 149150 | 1 | 0 | 0 | 0 | 0 |
| 149168 | 2 | 0 | 0 | 0 | 0 |
| 150151 | 1 | 0 | 0 | 0 | 0 |
| 151152 | 1 | 0 | 0 | 0 | 0 |
| 151153 | 1 | 0 | 0 | 0 | 0 |
| 151154 | 1 | 0 | 0 | 0 | 0 |
| 154155 | 1 | 0 | 0 | 0 | 0 |
| 154156 | 1 | 0 | 0 | 0 | 0 |
| 154157 | 1 | 0 | 0 | 0 | 0 |
| 157158 | 1 | 0 | 0 | 0 | 0 |
| 157159 | 1 | 0 | 0 | 0 | 0 |
| 157160 | 1 | 0 | 0 | 0 | 0 |
| 160161 | 1 | 0 | 0 | 0 | 0 |
| 161162 | 1 | 0 | 0 | 0 | 0 |
| 161169 | 2 | 0 | 0 | 0 | 0 |
| 162163 | 1 | 0 | 0 | 0 | 0 |
| 162164 | 1 | 0 | 0 | 0 | 0 |
| 162165 | 1 | 0 | 0 | 0 | 0 |
| 165166 | 1 | 0 | 0 | 0 | 0 |
| 165167 | 1 | 0 | 0 | 0 | 0 |
| 165184 | 1 | 0 | 0 | 0 | 0 |
| 170171 | 1 | 0 | 0 | 0 | 0 |
| 170172 | 1 | 0 | 0 | 0 | 0 |
| 172173 | 1 | 0 | 0 | 0 | 0 |
| 172174 | 1 | 0 | 0 | 0 | 0 |
| 172175 | 1 | 0 | 0 | 0 | 0 |
| 175176 | 1 | 0 | 0 | 0 | 0 |
| 175177 | 1 | 0 | 0 | 0 | 0 |
| 175178 | 1 | 0 | 0 | 0 | 0 |
| 178179 | 1 | 0 | 0 | 0 | 0 |
| 178180 | 1 | 0 | 0 | 0 | 0 |
| 178181 | 1 | 0 | 0 | 0 | 0 |
| 181182 | 1 | 0 | 0 | 0 | 0 |
| 181183 | 1 | 0 | 0 | 0 | 0 |
| 181184 | 1 | 0 | 0 | 0 | 0 |
| 184185 | 1 | 0 | 0 | 0 | 0 |
| 185186 | 1 | 0 | 0 | 0 | 0 |
| 185187 | 1 | 0 | 0 | 0 | 0 |
| 185188 | 1 | 0 | 0 | 0 | 0 |
| 188189 | 1 | 0 | 0 | 0 | 0 |
| 188190 | 1 | 0 | 0 | 0 | 0 |
| 188191 | 1 | 0 | 0 | 0 | 0 |
| 191192 | 1 | 0 | 0 | 0 | 0 |
| 191211 | 2 | 0 | 0 | 0 | 0 |
| 192193 | 1 | 0 | 0 | 0 | 0 |
| 193194 | 1 | 0 | 0 | 0 | 0 |
| 193195 | 1 | 0 | 0 | 0 | 0 |
| 193196 | 1 | 0 | 0 | 0 | 0 |
| 196197 | 1 | 0 | 0 | 0 | 0 |
| 196198 | 1 | 0 | 0 | 0 | 0 |
| 196199 | 1 | 0 | 0 | 0 | 0 |
| 199200 | 1 | 0 | 0 | 0 | 0 |
| 199201 | 1 | 0 | 0 | 0 | 0 |
| 199202 | 1 | 0 | 0 | 0 | 0 |
| 202203 | 1 | 0 | 0 | 0 | 0 |
| 203204 | 1 | 0 | 0 | 0 | 0 |
| 203212 | 2 | 0 | 0 | 0 | 0 |
| 204205 | 1 | 0 | 0 | 0 | 0 |
| 204206 | 1 | 0 | 0 | 0 | 0 |
| 204207 | 1 | 0 | 0 | 0 | 0 |
| 207208 | 1 | 0 | 0 | 0 | 0 |
| 207209 | 1 | 0 | 0 | 0 | 0 |
| 207210 | 1 | 0 | 0 | 0 | 0 |







|    |    |   |   |   |   |   |
|----|----|---|---|---|---|---|
| 6  | 9  | 1 | 0 | 0 | 0 | 0 |
| 9  | 10 | 1 | 0 | 0 | 0 | 0 |
| 9  | 11 | 1 | 0 | 0 | 0 | 0 |
| 9  | 12 | 1 | 0 | 0 | 0 | 0 |
| 12 | 13 | 1 | 0 | 0 | 0 | 0 |
| 12 | 14 | 1 | 0 | 0 | 0 | 0 |
| 12 | 15 | 1 | 0 | 0 | 0 | 0 |
| 15 | 16 | 1 | 0 | 0 | 0 | 0 |
| 15 | 17 | 1 | 0 | 0 | 0 | 0 |
| 15 | 18 | 1 | 0 | 0 | 0 | 0 |
| 18 | 19 | 1 | 0 | 0 | 0 | 0 |
| 18 | 20 | 1 | 0 | 0 | 0 | 0 |
| 20 | 21 | 1 | 0 | 0 | 0 | 0 |
| 20 | 22 | 1 | 0 | 0 | 0 | 0 |
| 20 | 23 | 1 | 0 | 0 | 0 | 0 |
| 23 | 24 | 1 | 0 | 0 | 0 | 0 |
| 23 | 25 | 1 | 0 | 0 | 0 | 0 |
| 23 | 26 | 1 | 0 | 0 | 0 | 0 |
| 26 | 27 | 1 | 0 | 0 | 0 | 0 |
| 26 | 45 | 2 | 0 | 0 | 0 | 0 |
| 27 | 28 | 1 | 0 | 0 | 0 | 0 |
| 28 | 29 | 1 | 0 | 0 | 0 | 0 |
| 28 | 30 | 1 | 0 | 0 | 0 | 0 |
| 28 | 31 | 1 | 0 | 0 | 0 | 0 |
| 31 | 32 | 1 | 0 | 0 | 0 | 0 |
| 31 | 33 | 1 | 0 | 0 | 0 | 0 |
| 31 | 34 | 1 | 0 | 0 | 0 | 0 |
| 34 | 35 | 1 | 0 | 0 | 0 | 0 |
| 34 | 36 | 1 | 0 | 0 | 0 | 0 |
| 34 | 37 | 1 | 0 | 0 | 0 | 0 |
| 37 | 38 | 1 | 0 | 0 | 0 | 0 |
| 38 | 39 | 1 | 0 | 0 | 0 | 0 |
| 38 | 46 | 2 | 0 | 0 | 0 | 0 |
| 39 | 40 | 1 | 0 | 0 | 0 | 0 |
| 39 | 41 | 1 | 0 | 0 | 0 | 0 |
| 39 | 42 | 1 | 0 | 0 | 0 | 0 |
| 42 | 43 | 1 | 0 | 0 | 0 | 0 |
| 42 | 44 | 1 | 0 | 0 | 0 | 0 |
| 42 | 64 | 1 | 0 | 0 | 0 | 0 |
| 47 | 48 | 1 | 0 | 0 | 0 | 0 |
| 47 | 49 | 1 | 0 | 0 | 0 | 0 |
| 49 | 50 | 1 | 0 | 0 | 0 | 0 |
| 49 | 51 | 1 | 0 | 0 | 0 | 0 |
| 49 | 52 | 1 | 0 | 0 | 0 | 0 |
| 52 | 53 | 1 | 0 | 0 | 0 | 0 |
| 52 | 54 | 1 | 0 | 0 | 0 | 0 |
| 52 | 55 | 1 | 0 | 0 | 0 | 0 |
| 55 | 56 | 1 | 0 | 0 | 0 | 0 |
| 55 | 57 | 1 | 0 | 0 | 0 | 0 |
| 55 | 58 | 1 | 0 | 0 | 0 | 0 |
| 58 | 59 | 1 | 0 | 0 | 0 | 0 |
| 58 | 60 | 1 | 0 | 0 | 0 | 0 |
| 58 | 61 | 1 | 0 | 0 | 0 | 0 |
| 61 | 62 | 1 | 0 | 0 | 0 | 0 |
| 61 | 63 | 1 | 0 | 0 | 0 | 0 |
| 61 | 64 | 1 | 0 | 0 | 0 | 0 |
| 64 | 65 | 1 | 0 | 0 | 0 | 0 |
| 65 | 66 | 1 | 0 | 0 | 0 | 0 |
| 65 | 67 | 1 | 0 | 0 | 0 | 0 |
| 65 | 68 | 1 | 0 | 0 | 0 | 0 |
| 68 | 69 | 1 | 0 | 0 | 0 | 0 |
| 68 | 70 | 1 | 0 | 0 | 0 | 0 |
| 68 | 71 | 1 | 0 | 0 | 0 | 0 |
| 71 | 72 | 1 | 0 | 0 | 0 | 0 |
| 71 | 90 | 2 | 0 | 0 | 0 | 0 |
| 72 | 73 | 1 | 0 | 0 | 0 | 0 |
| 73 | 74 | 1 | 0 | 0 | 0 | 0 |
| 73 | 75 | 1 | 0 | 0 | 0 | 0 |
| 73 | 76 | 1 | 0 | 0 | 0 | 0 |
| 76 | 77 | 1 | 0 | 0 | 0 | 0 |
| 76 | 78 | 1 | 0 | 0 | 0 | 0 |
| 76 | 79 | 1 | 0 | 0 | 0 | 0 |
| 79 | 80 | 1 | 0 | 0 | 0 | 0 |
| 79 | 81 | 1 | 0 | 0 | 0 | 0 |
| 79 | 82 | 1 | 0 | 0 | 0 | 0 |
| 82 | 83 | 1 | 0 | 0 | 0 | 0 |
| 83 | 84 | 1 | 0 | 0 | 0 | 0 |
| 83 | 91 | 2 | 0 | 0 | 0 | 0 |
| 84 | 85 | 1 | 0 | 0 | 0 | 0 |
| 84 | 86 | 1 | 0 | 0 | 0 | 0 |
| 84 | 87 | 1 | 0 | 0 | 0 | 0 |

|     |     |   |   |   |   |   |
|-----|-----|---|---|---|---|---|
| 87  | 88  | 1 | 0 | 0 | 0 | 0 |
| 87  | 89  | 1 | 0 | 0 | 0 | 0 |
| 87  | 109 | 1 | 0 | 0 | 0 | 0 |
| 92  | 93  | 1 | 0 | 0 | 0 | 0 |
| 92  | 94  | 1 | 0 | 0 | 0 | 0 |
| 94  | 95  | 1 | 0 | 0 | 0 | 0 |
| 94  | 96  | 1 | 0 | 0 | 0 | 0 |
| 94  | 97  | 1 | 0 | 0 | 0 | 0 |
| 97  | 98  | 1 | 0 | 0 | 0 | 0 |
| 97  | 99  | 1 | 0 | 0 | 0 | 0 |
| 97  | 100 | 1 | 0 | 0 | 0 | 0 |
| 100 | 101 | 1 | 0 | 0 | 0 | 0 |
| 100 | 102 | 1 | 0 | 0 | 0 | 0 |
| 100 | 103 | 1 | 0 | 0 | 0 | 0 |
| 103 | 104 | 1 | 0 | 0 | 0 | 0 |
| 103 | 105 | 1 | 0 | 0 | 0 | 0 |
| 103 | 106 | 1 | 0 | 0 | 0 | 0 |
| 106 | 107 | 1 | 0 | 0 | 0 | 0 |
| 106 | 108 | 1 | 0 | 0 | 0 | 0 |
| 106 | 109 | 1 | 0 | 0 | 0 | 0 |
| 109 | 110 | 1 | 0 | 0 | 0 | 0 |
| 110 | 111 | 1 | 0 | 0 | 0 | 0 |
| 110 | 112 | 1 | 0 | 0 | 0 | 0 |
| 110 | 113 | 1 | 0 | 0 | 0 | 0 |
| 113 | 114 | 1 | 0 | 0 | 0 | 0 |
| 113 | 115 | 1 | 0 | 0 | 0 | 0 |
| 113 | 116 | 1 | 0 | 0 | 0 | 0 |
| 116 | 117 | 1 | 0 | 0 | 0 | 0 |
| 116 | 135 | 2 | 0 | 0 | 0 | 0 |
| 117 | 118 | 1 | 0 | 0 | 0 | 0 |
| 118 | 119 | 1 | 0 | 0 | 0 | 0 |
| 118 | 120 | 1 | 0 | 0 | 0 | 0 |
| 118 | 121 | 1 | 0 | 0 | 0 | 0 |
| 121 | 122 | 1 | 0 | 0 | 0 | 0 |
| 121 | 123 | 1 | 0 | 0 | 0 | 0 |
| 121 | 124 | 1 | 0 | 0 | 0 | 0 |
| 124 | 125 | 1 | 0 | 0 | 0 | 0 |
| 124 | 126 | 1 | 0 | 0 | 0 | 0 |
| 124 | 127 | 1 | 0 | 0 | 0 | 0 |
| 127 | 128 | 1 | 0 | 0 | 0 | 0 |
| 128 | 129 | 1 | 0 | 0 | 0 | 0 |
| 128 | 136 | 2 | 0 | 0 | 0 | 0 |
| 129 | 130 | 1 | 0 | 0 | 0 | 0 |
| 129 | 131 | 1 | 0 | 0 | 0 | 0 |
| 129 | 132 | 1 | 0 | 0 | 0 | 0 |
| 132 | 133 | 1 | 0 | 0 | 0 | 0 |
| 132 | 134 | 1 | 0 | 0 | 0 | 0 |
| 132 | 154 | 1 | 0 | 0 | 0 | 0 |
| 137 | 138 | 1 | 0 | 0 | 0 | 0 |
| 137 | 139 | 1 | 0 | 0 | 0 | 0 |
| 139 | 140 | 1 | 0 | 0 | 0 | 0 |
| 139 | 141 | 1 | 0 | 0 | 0 | 0 |
| 139 | 142 | 1 | 0 | 0 | 0 | 0 |
| 142 | 143 | 1 | 0 | 0 | 0 | 0 |
| 142 | 144 | 1 | 0 | 0 | 0 | 0 |
| 142 | 145 | 1 | 0 | 0 | 0 | 0 |
| 145 | 146 | 1 | 0 | 0 | 0 | 0 |
| 145 | 147 | 1 | 0 | 0 | 0 | 0 |
| 145 | 148 | 1 | 0 | 0 | 0 | 0 |
| 148 | 149 | 1 | 0 | 0 | 0 | 0 |
| 148 | 150 | 1 | 0 | 0 | 0 | 0 |
| 148 | 151 | 1 | 0 | 0 | 0 | 0 |
| 151 | 152 | 1 | 0 | 0 | 0 | 0 |
| 151 | 153 | 1 | 0 | 0 | 0 | 0 |
| 151 | 154 | 1 | 0 | 0 | 0 | 0 |
| 154 | 155 | 1 | 0 | 0 | 0 | 0 |
| 155 | 156 | 1 | 0 | 0 | 0 | 0 |
| 155 | 157 | 1 | 0 | 0 | 0 | 0 |
| 155 | 158 | 1 | 0 | 0 | 0 | 0 |
| 158 | 159 | 1 | 0 | 0 | 0 | 0 |
| 158 | 160 | 1 | 0 | 0 | 0 | 0 |
| 158 | 161 | 1 | 0 | 0 | 0 | 0 |
| 161 | 162 | 1 | 0 | 0 | 0 | 0 |
| 161 | 180 | 2 | 0 | 0 | 0 | 0 |
| 162 | 163 | 1 | 0 | 0 | 0 | 0 |
| 163 | 164 | 1 | 0 | 0 | 0 | 0 |
| 163 | 165 | 1 | 0 | 0 | 0 | 0 |
| 163 | 166 | 1 | 0 | 0 | 0 | 0 |
| 166 | 167 | 1 | 0 | 0 | 0 | 0 |
| 166 | 168 | 1 | 0 | 0 | 0 | 0 |
| 166 | 169 | 1 | 0 | 0 | 0 | 0 |

```

169170 1 0 0 0 0
169171 1 0 0 0 0
169172 1 0 0 0 0
172173 1 0 0 0 0
173174 1 0 0 0 0
173181 2 0 0 0 0
174175 1 0 0 0 0
174176 1 0 0 0 0
174177 1 0 0 0 0
177178 1 0 0 0 0
177179 1 0 0 0 0
177199 1 0 0 0 0
182183 1 0 0 0 0
182184 1 0 0 0 0
184185 1 0 0 0 0
184186 1 0 0 0 0
184187 1 0 0 0 0
187188 1 0 0 0 0
187189 1 0 0 0 0
187190 1 0 0 0 0
190191 1 0 0 0 0
190192 1 0 0 0 0
190193 1 0 0 0 0
193194 1 0 0 0 0
193195 1 0 0 0 0
193196 1 0 0 0 0
196197 1 0 0 0 0
196198 1 0 0 0 0
196199 1 0 0 0 0
199200 1 0 0 0 0
200201 1 0 0 0 0
200202 1 0 0 0 0
200203 1 0 0 0 0
203204 1 0 0 0 0
203205 1 0 0 0 0
203206 1 0 0 0 0
206207 1 0 0 0 0
206226 2 0 0 0 0
207208 1 0 0 0 0
208209 1 0 0 0 0
208210 1 0 0 0 0
208211 1 0 0 0 0
211212 1 0 0 0 0
211213 1 0 0 0 0
211214 1 0 0 0 0
214215 1 0 0 0 0
214216 1 0 0 0 0
214217 1 0 0 0 0
217218 1 0 0 0 0
218219 1 0 0 0 0
218227 2 0 0 0 0
219220 1 0 0 0 0
219221 1 0 0 0 0
219222 1 0 0 0 0
222223 1 0 0 0 0
222224 1 0 0 0 0
222225 1 0 0 0 0

```

```

M END
> <NAME>
II32_1

```

```

$$$$
II36_1
MOE2012 3D

```

```

242241 0 0 1 0 0 0 0 0 0999 V2000
2.8590 -6.5040 2.4400 O 0 0 0 0 0 0 0 0 0 0 0 0 0 0 0 0 0 0
3.3900 -7.2620 2.7360 H 0 0 0 0 0 0 0 0 0 0 0 0 0 0 0 0 0 0
3.7480 -5.4020 2.3070 C 0 0 0 0 0 0 0 0 0 0 0 0 0 0 0 0 0 0
4.2150 -5.2140 3.2790 H 0 0 0 0 0 0 0 0 0 0 0 0 0 0 0 0 0 0
4.5260 -5.6690 1.5840 H 0 0 0 0 0 0 0 0 0 0 0 0 0 0 0 0 0 0
2.9650 -4.1830 1.8360 C 0 0 0 0 0 0 0 0 0 0 0 0 0 0 0 0 0 0
2.4710 -4.4150 0.8840 H 0 0 0 0 0 0 0 0 0 0 0 0 0 0 0 0 0 0
2.1580 -3.9720 2.5490 H 0 0 0 0 0 0 0 0 0 0 0 0 0 0 0 0 0 0
3.8660 -2.9580 1.6790 C 0 0 0 0 0 0 0 0 0 0 0 0 0 0 0 0 0 0
4.3480 -2.7330 2.6380 H 0 0 0 0 0 0 0 0 0 0 0 0 0 0 0 0 0 0
4.6640 -3.1800 0.9600 H 0 0 0 0 0 0 0 0 0 0 0 0 0 0 0 0 0 0
3.0760 -1.7360 1.2040 C 0 0 0 0 0 0 0 0 0 0 0 0 0 0 0 0 0 0
2.6000 -1.9580 0.2410 H 0 0 0 0 0 0 0 0 0 0 0 0 0 0 0 0 0 0
2.2730 -1.5170 1.9190 H 0 0 0 0 0 0 0 0 0 0 0 0 0 0 0 0 0 0
3.9790 -0.5080 1.0580 C 0 0 0 0 0 0 0 0 0 0 0 0 0 0 0 0 0 0

```









|    |     |   |   |   |   |   |
|----|-----|---|---|---|---|---|
| 15 | 18  | 1 | 0 | 0 | 0 | 0 |
| 18 | 19  | 1 | 0 | 0 | 0 | 0 |
| 18 | 20  | 1 | 0 | 0 | 0 | 0 |
| 18 | 21  | 1 | 0 | 0 | 0 | 0 |
| 21 | 22  | 1 | 0 | 0 | 0 | 0 |
| 21 | 23  | 1 | 0 | 0 | 0 | 0 |
| 23 | 24  | 1 | 0 | 0 | 0 | 0 |
| 23 | 25  | 1 | 0 | 0 | 0 | 0 |
| 23 | 26  | 1 | 0 | 0 | 0 | 0 |
| 26 | 27  | 1 | 0 | 0 | 0 | 0 |
| 26 | 28  | 1 | 0 | 0 | 0 | 0 |
| 26 | 29  | 1 | 0 | 0 | 0 | 0 |
| 29 | 30  | 1 | 0 | 0 | 0 | 0 |
| 29 | 48  | 2 | 0 | 0 | 0 | 0 |
| 30 | 31  | 1 | 0 | 0 | 0 | 0 |
| 31 | 32  | 1 | 0 | 0 | 0 | 0 |
| 31 | 33  | 1 | 0 | 0 | 0 | 0 |
| 31 | 34  | 1 | 0 | 0 | 0 | 0 |
| 34 | 35  | 1 | 0 | 0 | 0 | 0 |
| 34 | 36  | 1 | 0 | 0 | 0 | 0 |
| 34 | 37  | 1 | 0 | 0 | 0 | 0 |
| 37 | 38  | 1 | 0 | 0 | 0 | 0 |
| 37 | 39  | 1 | 0 | 0 | 0 | 0 |
| 37 | 40  | 1 | 0 | 0 | 0 | 0 |
| 40 | 41  | 1 | 0 | 0 | 0 | 0 |
| 41 | 42  | 1 | 0 | 0 | 0 | 0 |
| 41 | 49  | 2 | 0 | 0 | 0 | 0 |
| 42 | 43  | 1 | 0 | 0 | 0 | 0 |
| 42 | 44  | 1 | 0 | 0 | 0 | 0 |
| 42 | 45  | 1 | 0 | 0 | 0 | 0 |
| 45 | 46  | 1 | 0 | 0 | 0 | 0 |
| 45 | 47  | 1 | 0 | 0 | 0 | 0 |
| 45 | 70  | 1 | 0 | 0 | 0 | 0 |
| 50 | 51  | 1 | 0 | 0 | 0 | 0 |
| 50 | 52  | 1 | 0 | 0 | 0 | 0 |
| 52 | 53  | 1 | 0 | 0 | 0 | 0 |
| 52 | 54  | 1 | 0 | 0 | 0 | 0 |
| 52 | 55  | 1 | 0 | 0 | 0 | 0 |
| 55 | 56  | 1 | 0 | 0 | 0 | 0 |
| 55 | 57  | 1 | 0 | 0 | 0 | 0 |
| 55 | 58  | 1 | 0 | 0 | 0 | 0 |
| 58 | 59  | 1 | 0 | 0 | 0 | 0 |
| 58 | 60  | 1 | 0 | 0 | 0 | 0 |
| 58 | 61  | 1 | 0 | 0 | 0 | 0 |
| 61 | 62  | 1 | 0 | 0 | 0 | 0 |
| 61 | 63  | 1 | 0 | 0 | 0 | 0 |
| 61 | 64  | 1 | 0 | 0 | 0 | 0 |
| 64 | 65  | 1 | 0 | 0 | 0 | 0 |
| 64 | 66  | 1 | 0 | 0 | 0 | 0 |
| 64 | 67  | 1 | 0 | 0 | 0 | 0 |
| 67 | 68  | 1 | 0 | 0 | 0 | 0 |
| 67 | 69  | 1 | 0 | 0 | 0 | 0 |
| 67 | 70  | 1 | 0 | 0 | 0 | 0 |
| 70 | 71  | 1 | 0 | 0 | 0 | 0 |
| 71 | 72  | 1 | 0 | 0 | 0 | 0 |
| 71 | 73  | 1 | 0 | 0 | 0 | 0 |
| 71 | 74  | 1 | 0 | 0 | 0 | 0 |
| 74 | 75  | 1 | 0 | 0 | 0 | 0 |
| 74 | 76  | 1 | 0 | 0 | 0 | 0 |
| 74 | 77  | 1 | 0 | 0 | 0 | 0 |
| 77 | 78  | 1 | 0 | 0 | 0 | 0 |
| 77 | 96  | 2 | 0 | 0 | 0 | 0 |
| 78 | 79  | 1 | 0 | 0 | 0 | 0 |
| 79 | 80  | 1 | 0 | 0 | 0 | 0 |
| 79 | 81  | 1 | 0 | 0 | 0 | 0 |
| 79 | 82  | 1 | 0 | 0 | 0 | 0 |
| 82 | 83  | 1 | 0 | 0 | 0 | 0 |
| 82 | 84  | 1 | 0 | 0 | 0 | 0 |
| 82 | 85  | 1 | 0 | 0 | 0 | 0 |
| 85 | 86  | 1 | 0 | 0 | 0 | 0 |
| 85 | 87  | 1 | 0 | 0 | 0 | 0 |
| 85 | 88  | 1 | 0 | 0 | 0 | 0 |
| 88 | 89  | 1 | 0 | 0 | 0 | 0 |
| 89 | 90  | 1 | 0 | 0 | 0 | 0 |
| 89 | 97  | 2 | 0 | 0 | 0 | 0 |
| 90 | 91  | 1 | 0 | 0 | 0 | 0 |
| 90 | 92  | 1 | 0 | 0 | 0 | 0 |
| 90 | 93  | 1 | 0 | 0 | 0 | 0 |
| 93 | 94  | 1 | 0 | 0 | 0 | 0 |
| 93 | 95  | 1 | 0 | 0 | 0 | 0 |
| 93 | 118 | 1 | 0 | 0 | 0 | 0 |

|        |   |   |   |   |   |
|--------|---|---|---|---|---|
| 98 99  | 1 | 0 | 0 | 0 | 0 |
| 98100  | 1 | 0 | 0 | 0 | 0 |
| 100101 | 1 | 0 | 0 | 0 | 0 |
| 100102 | 1 | 0 | 0 | 0 | 0 |
| 100103 | 1 | 0 | 0 | 0 | 0 |
| 103104 | 1 | 0 | 0 | 0 | 0 |
| 103105 | 1 | 0 | 0 | 0 | 0 |
| 103106 | 1 | 0 | 0 | 0 | 0 |
| 106107 | 1 | 0 | 0 | 0 | 0 |
| 106108 | 1 | 0 | 0 | 0 | 0 |
| 106109 | 1 | 0 | 0 | 0 | 0 |
| 109110 | 1 | 0 | 0 | 0 | 0 |
| 109111 | 1 | 0 | 0 | 0 | 0 |
| 109112 | 1 | 0 | 0 | 0 | 0 |
| 112113 | 1 | 0 | 0 | 0 | 0 |
| 112114 | 1 | 0 | 0 | 0 | 0 |
| 112115 | 1 | 0 | 0 | 0 | 0 |
| 115116 | 1 | 0 | 0 | 0 | 0 |
| 115117 | 1 | 0 | 0 | 0 | 0 |
| 115118 | 1 | 0 | 0 | 0 | 0 |
| 118119 | 1 | 0 | 0 | 0 | 0 |
| 119120 | 1 | 0 | 0 | 0 | 0 |
| 119121 | 1 | 0 | 0 | 0 | 0 |
| 119122 | 1 | 0 | 0 | 0 | 0 |
| 122123 | 1 | 0 | 0 | 0 | 0 |
| 122124 | 1 | 0 | 0 | 0 | 0 |
| 122125 | 1 | 0 | 0 | 0 | 0 |
| 125126 | 1 | 0 | 0 | 0 | 0 |
| 125144 | 2 | 0 | 0 | 0 | 0 |
| 126127 | 1 | 0 | 0 | 0 | 0 |
| 127128 | 1 | 0 | 0 | 0 | 0 |
| 127129 | 1 | 0 | 0 | 0 | 0 |
| 127130 | 1 | 0 | 0 | 0 | 0 |
| 130131 | 1 | 0 | 0 | 0 | 0 |
| 130132 | 1 | 0 | 0 | 0 | 0 |
| 130133 | 1 | 0 | 0 | 0 | 0 |
| 133134 | 1 | 0 | 0 | 0 | 0 |
| 133135 | 1 | 0 | 0 | 0 | 0 |
| 133136 | 1 | 0 | 0 | 0 | 0 |
| 136137 | 1 | 0 | 0 | 0 | 0 |
| 137138 | 1 | 0 | 0 | 0 | 0 |
| 137145 | 2 | 0 | 0 | 0 | 0 |
| 138139 | 1 | 0 | 0 | 0 | 0 |
| 138140 | 1 | 0 | 0 | 0 | 0 |
| 138141 | 1 | 0 | 0 | 0 | 0 |
| 141142 | 1 | 0 | 0 | 0 | 0 |
| 141143 | 1 | 0 | 0 | 0 | 0 |
| 141166 | 1 | 0 | 0 | 0 | 0 |
| 146147 | 1 | 0 | 0 | 0 | 0 |
| 146148 | 1 | 0 | 0 | 0 | 0 |
| 148149 | 1 | 0 | 0 | 0 | 0 |
| 148150 | 1 | 0 | 0 | 0 | 0 |
| 148151 | 1 | 0 | 0 | 0 | 0 |
| 151152 | 1 | 0 | 0 | 0 | 0 |
| 151153 | 1 | 0 | 0 | 0 | 0 |
| 151154 | 1 | 0 | 0 | 0 | 0 |
| 154155 | 1 | 0 | 0 | 0 | 0 |
| 154156 | 1 | 0 | 0 | 0 | 0 |
| 154157 | 1 | 0 | 0 | 0 | 0 |
| 157158 | 1 | 0 | 0 | 0 | 0 |
| 157159 | 1 | 0 | 0 | 0 | 0 |
| 157160 | 1 | 0 | 0 | 0 | 0 |
| 160161 | 1 | 0 | 0 | 0 | 0 |
| 160162 | 1 | 0 | 0 | 0 | 0 |
| 160163 | 1 | 0 | 0 | 0 | 0 |
| 163164 | 1 | 0 | 0 | 0 | 0 |
| 163165 | 1 | 0 | 0 | 0 | 0 |
| 163166 | 1 | 0 | 0 | 0 | 0 |
| 166167 | 1 | 0 | 0 | 0 | 0 |
| 167168 | 1 | 0 | 0 | 0 | 0 |
| 167169 | 1 | 0 | 0 | 0 | 0 |
| 167170 | 1 | 0 | 0 | 0 | 0 |
| 170171 | 1 | 0 | 0 | 0 | 0 |
| 170172 | 1 | 0 | 0 | 0 | 0 |
| 170173 | 1 | 0 | 0 | 0 | 0 |
| 173174 | 1 | 0 | 0 | 0 | 0 |
| 173192 | 2 | 0 | 0 | 0 | 0 |
| 174175 | 1 | 0 | 0 | 0 | 0 |
| 175176 | 1 | 0 | 0 | 0 | 0 |
| 175177 | 1 | 0 | 0 | 0 | 0 |
| 175178 | 1 | 0 | 0 | 0 | 0 |

```

178179 1 0 0 0 0
178180 1 0 0 0 0
178181 1 0 0 0 0
181182 1 0 0 0 0
181183 1 0 0 0 0
181184 1 0 0 0 0
184185 1 0 0 0 0
185186 1 0 0 0 0
185193 2 0 0 0 0
186187 1 0 0 0 0
186188 1 0 0 0 0
186189 1 0 0 0 0
189190 1 0 0 0 0
189191 1 0 0 0 0
189214 1 0 0 0 0
194195 1 0 0 0 0
194196 1 0 0 0 0
196197 1 0 0 0 0
196198 1 0 0 0 0
196199 1 0 0 0 0
199200 1 0 0 0 0
199201 1 0 0 0 0
199202 1 0 0 0 0
202203 1 0 0 0 0
202204 1 0 0 0 0
202205 1 0 0 0 0
205206 1 0 0 0 0
205207 1 0 0 0 0
205208 1 0 0 0 0
208209 1 0 0 0 0
208210 1 0 0 0 0
208211 1 0 0 0 0
211212 1 0 0 0 0
211213 1 0 0 0 0
211214 1 0 0 0 0
214215 1 0 0 0 0
215216 1 0 0 0 0
215217 1 0 0 0 0
215218 1 0 0 0 0
218219 1 0 0 0 0
218220 1 0 0 0 0
218221 1 0 0 0 0
221222 1 0 0 0 0
221241 2 0 0 0 0
222223 1 0 0 0 0
223224 1 0 0 0 0
223225 1 0 0 0 0
223226 1 0 0 0 0
226227 1 0 0 0 0
226228 1 0 0 0 0
226229 1 0 0 0 0
229230 1 0 0 0 0
229231 1 0 0 0 0
229232 1 0 0 0 0
232233 1 0 0 0 0
233234 1 0 0 0 0
233242 2 0 0 0 0
234235 1 0 0 0 0
234236 1 0 0 0 0
234237 1 0 0 0 0
237238 1 0 0 0 0
237239 1 0 0 0 0
237240 1 0 0 0 0
M END
> <NAME>
II36_1

```

```

$$$$
JJ20_1
MOE2012 3D

```

```

227226 0 0 1 0 0 0 0 0999 V2000
53.8570 1.2760 -14.6870 O 0 0 0 0 0 0 0 0 0 0 0 0 0 0 0
53.9820 2.2250 -14.5150 H 0 0 0 0 0 0 0 0 0 0 0 0 0 0 0
52.8760 1.1660 -15.7100 C 0 0 0 0 0 0 0 0 0 0 0 0 0 0 0
51.9250 1.5360 -15.3150 H 0 0 0 0 0 0 0 0 0 0 0 0 0 0 0
53.1790 1.7930 -16.5540 H 0 0 0 0 0 0 0 0 0 0 0 0 0 0 0
52.7640 -0.2910 -16.1340 C 0 0 0 0 0 0 0 0 0 0 0 0 0 0 0
53.7350 -0.6320 -16.5160 H 0 0 0 0 0 0 0 0 0 0 0 0 0 0 0
52.5550 -0.9090 -15.2500 H 0 0 0 0 0 0 0 0 0 0 0 0 0 0 0
51.6720 -0.4790 -17.1850 C 0 0 0 0 0 0 0 0 0 0 0 0 0 0 0

```









|     |     |   |   |   |   |   |
|-----|-----|---|---|---|---|---|
| 26  | 27  | 1 | 0 | 0 | 0 | 0 |
| 26  | 28  | 1 | 0 | 0 | 0 | 0 |
| 26  | 44  | 1 | 0 | 0 | 0 | 0 |
| 29  | 30  | 1 | 0 | 0 | 0 | 0 |
| 29  | 31  | 1 | 0 | 0 | 0 | 0 |
| 29  | 32  | 1 | 0 | 0 | 0 | 0 |
| 29  | 44  | 1 | 0 | 0 | 0 | 0 |
| 32  | 33  | 1 | 0 | 0 | 0 | 0 |
| 32  | 34  | 1 | 0 | 0 | 0 | 0 |
| 32  | 35  | 1 | 0 | 0 | 0 | 0 |
| 35  | 36  | 1 | 0 | 0 | 0 | 0 |
| 36  | 37  | 1 | 0 | 0 | 0 | 0 |
| 36  | 43  | 2 | 0 | 0 | 0 | 0 |
| 37  | 38  | 1 | 0 | 0 | 0 | 0 |
| 37  | 39  | 1 | 0 | 0 | 0 | 0 |
| 37  | 40  | 1 | 0 | 0 | 0 | 0 |
| 40  | 41  | 1 | 0 | 0 | 0 | 0 |
| 40  | 42  | 1 | 0 | 0 | 0 | 0 |
| 40  | 58  | 1 | 0 | 0 | 0 | 0 |
| 44  | 45  | 1 | 0 | 0 | 0 | 0 |
| 44  | 46  | 1 | 0 | 0 | 0 | 0 |
| 47  | 48  | 1 | 0 | 0 | 0 | 0 |
| 47  | 49  | 1 | 0 | 0 | 0 | 0 |
| 49  | 50  | 1 | 0 | 0 | 0 | 0 |
| 49  | 51  | 1 | 0 | 0 | 0 | 0 |
| 49  | 52  | 1 | 0 | 0 | 0 | 0 |
| 52  | 53  | 1 | 0 | 0 | 0 | 0 |
| 52  | 54  | 1 | 0 | 0 | 0 | 0 |
| 52  | 55  | 1 | 0 | 0 | 0 | 0 |
| 55  | 56  | 1 | 0 | 0 | 0 | 0 |
| 55  | 57  | 1 | 0 | 0 | 0 | 0 |
| 55  | 58  | 1 | 0 | 0 | 0 | 0 |
| 58  | 59  | 1 | 0 | 0 | 0 | 0 |
| 59  | 60  | 1 | 0 | 0 | 0 | 0 |
| 59  | 61  | 1 | 0 | 0 | 0 | 0 |
| 59  | 62  | 1 | 0 | 0 | 0 | 0 |
| 62  | 63  | 1 | 0 | 0 | 0 | 0 |
| 62  | 64  | 1 | 0 | 0 | 0 | 0 |
| 62  | 65  | 1 | 0 | 0 | 0 | 0 |
| 65  | 66  | 1 | 0 | 0 | 0 | 0 |
| 65  | 70  | 2 | 0 | 0 | 0 | 0 |
| 66  | 67  | 1 | 0 | 0 | 0 | 0 |
| 67  | 68  | 1 | 0 | 0 | 0 | 0 |
| 67  | 69  | 1 | 0 | 0 | 0 | 0 |
| 67  | 71  | 1 | 0 | 0 | 0 | 0 |
| 71  | 72  | 1 | 0 | 0 | 0 | 0 |
| 71  | 73  | 1 | 0 | 0 | 0 | 0 |
| 71  | 89  | 1 | 0 | 0 | 0 | 0 |
| 74  | 75  | 1 | 0 | 0 | 0 | 0 |
| 74  | 76  | 1 | 0 | 0 | 0 | 0 |
| 74  | 77  | 1 | 0 | 0 | 0 | 0 |
| 74  | 89  | 1 | 0 | 0 | 0 | 0 |
| 77  | 78  | 1 | 0 | 0 | 0 | 0 |
| 77  | 79  | 1 | 0 | 0 | 0 | 0 |
| 77  | 80  | 1 | 0 | 0 | 0 | 0 |
| 80  | 81  | 1 | 0 | 0 | 0 | 0 |
| 81  | 82  | 1 | 0 | 0 | 0 | 0 |
| 81  | 88  | 2 | 0 | 0 | 0 | 0 |
| 82  | 83  | 1 | 0 | 0 | 0 | 0 |
| 82  | 84  | 1 | 0 | 0 | 0 | 0 |
| 82  | 85  | 1 | 0 | 0 | 0 | 0 |
| 85  | 86  | 1 | 0 | 0 | 0 | 0 |
| 85  | 87  | 1 | 0 | 0 | 0 | 0 |
| 85  | 103 | 1 | 0 | 0 | 0 | 0 |
| 89  | 90  | 1 | 0 | 0 | 0 | 0 |
| 89  | 91  | 1 | 0 | 0 | 0 | 0 |
| 92  | 93  | 1 | 0 | 0 | 0 | 0 |
| 92  | 94  | 1 | 0 | 0 | 0 | 0 |
| 94  | 95  | 1 | 0 | 0 | 0 | 0 |
| 94  | 96  | 1 | 0 | 0 | 0 | 0 |
| 94  | 97  | 1 | 0 | 0 | 0 | 0 |
| 97  | 98  | 1 | 0 | 0 | 0 | 0 |
| 97  | 99  | 1 | 0 | 0 | 0 | 0 |
| 97  | 100 | 1 | 0 | 0 | 0 | 0 |
| 100 | 101 | 1 | 0 | 0 | 0 | 0 |
| 100 | 102 | 1 | 0 | 0 | 0 | 0 |
| 100 | 103 | 1 | 0 | 0 | 0 | 0 |
| 103 | 104 | 1 | 0 | 0 | 0 | 0 |
| 104 | 105 | 1 | 0 | 0 | 0 | 0 |
| 104 | 106 | 1 | 0 | 0 | 0 | 0 |
| 104 | 107 | 1 | 0 | 0 | 0 | 0 |

|        |   |   |   |   |   |
|--------|---|---|---|---|---|
| 107108 | 1 | 0 | 0 | 0 | 0 |
| 107109 | 1 | 0 | 0 | 0 | 0 |
| 107110 | 1 | 0 | 0 | 0 | 0 |
| 110111 | 1 | 0 | 0 | 0 | 0 |
| 110115 | 2 | 0 | 0 | 0 | 0 |
| 111112 | 1 | 0 | 0 | 0 | 0 |
| 112113 | 1 | 0 | 0 | 0 | 0 |
| 112114 | 1 | 0 | 0 | 0 | 0 |
| 112116 | 1 | 0 | 0 | 0 | 0 |
| 116117 | 1 | 0 | 0 | 0 | 0 |
| 116118 | 1 | 0 | 0 | 0 | 0 |
| 116134 | 1 | 0 | 0 | 0 | 0 |
| 119120 | 1 | 0 | 0 | 0 | 0 |
| 119121 | 1 | 0 | 0 | 0 | 0 |
| 119122 | 1 | 0 | 0 | 0 | 0 |
| 119134 | 1 | 0 | 0 | 0 | 0 |
| 122123 | 1 | 0 | 0 | 0 | 0 |
| 122124 | 1 | 0 | 0 | 0 | 0 |
| 122125 | 1 | 0 | 0 | 0 | 0 |
| 125126 | 1 | 0 | 0 | 0 | 0 |
| 126127 | 1 | 0 | 0 | 0 | 0 |
| 126133 | 2 | 0 | 0 | 0 | 0 |
| 127128 | 1 | 0 | 0 | 0 | 0 |
| 127129 | 1 | 0 | 0 | 0 | 0 |
| 127130 | 1 | 0 | 0 | 0 | 0 |
| 130131 | 1 | 0 | 0 | 0 | 0 |
| 130132 | 1 | 0 | 0 | 0 | 0 |
| 130148 | 1 | 0 | 0 | 0 | 0 |
| 134135 | 1 | 0 | 0 | 0 | 0 |
| 134136 | 1 | 0 | 0 | 0 | 0 |
| 137138 | 1 | 0 | 0 | 0 | 0 |
| 137139 | 1 | 0 | 0 | 0 | 0 |
| 139140 | 1 | 0 | 0 | 0 | 0 |
| 139141 | 1 | 0 | 0 | 0 | 0 |
| 139142 | 1 | 0 | 0 | 0 | 0 |
| 142143 | 1 | 0 | 0 | 0 | 0 |
| 142144 | 1 | 0 | 0 | 0 | 0 |
| 142145 | 1 | 0 | 0 | 0 | 0 |
| 145146 | 1 | 0 | 0 | 0 | 0 |
| 145147 | 1 | 0 | 0 | 0 | 0 |
| 145148 | 1 | 0 | 0 | 0 | 0 |
| 148149 | 1 | 0 | 0 | 0 | 0 |
| 149150 | 1 | 0 | 0 | 0 | 0 |
| 149151 | 1 | 0 | 0 | 0 | 0 |
| 149152 | 1 | 0 | 0 | 0 | 0 |
| 152153 | 1 | 0 | 0 | 0 | 0 |
| 152154 | 1 | 0 | 0 | 0 | 0 |
| 152155 | 1 | 0 | 0 | 0 | 0 |
| 155156 | 1 | 0 | 0 | 0 | 0 |
| 155160 | 2 | 0 | 0 | 0 | 0 |
| 156157 | 1 | 0 | 0 | 0 | 0 |
| 157158 | 1 | 0 | 0 | 0 | 0 |
| 157159 | 1 | 0 | 0 | 0 | 0 |
| 157161 | 1 | 0 | 0 | 0 | 0 |
| 161162 | 1 | 0 | 0 | 0 | 0 |
| 161163 | 1 | 0 | 0 | 0 | 0 |
| 161179 | 1 | 0 | 0 | 0 | 0 |
| 164165 | 1 | 0 | 0 | 0 | 0 |
| 164166 | 1 | 0 | 0 | 0 | 0 |
| 164167 | 1 | 0 | 0 | 0 | 0 |
| 164179 | 1 | 0 | 0 | 0 | 0 |
| 167168 | 1 | 0 | 0 | 0 | 0 |
| 167169 | 1 | 0 | 0 | 0 | 0 |
| 167170 | 1 | 0 | 0 | 0 | 0 |
| 170171 | 1 | 0 | 0 | 0 | 0 |
| 171172 | 1 | 0 | 0 | 0 | 0 |
| 171178 | 2 | 0 | 0 | 0 | 0 |
| 172173 | 1 | 0 | 0 | 0 | 0 |
| 172174 | 1 | 0 | 0 | 0 | 0 |
| 172175 | 1 | 0 | 0 | 0 | 0 |
| 175176 | 1 | 0 | 0 | 0 | 0 |
| 175177 | 1 | 0 | 0 | 0 | 0 |
| 175193 | 1 | 0 | 0 | 0 | 0 |
| 179180 | 1 | 0 | 0 | 0 | 0 |
| 179181 | 1 | 0 | 0 | 0 | 0 |
| 182183 | 1 | 0 | 0 | 0 | 0 |
| 182184 | 1 | 0 | 0 | 0 | 0 |
| 184185 | 1 | 0 | 0 | 0 | 0 |
| 184186 | 1 | 0 | 0 | 0 | 0 |
| 184187 | 1 | 0 | 0 | 0 | 0 |
| 187188 | 1 | 0 | 0 | 0 | 0 |

```

187189 1 0 0 0 0
187190 1 0 0 0 0
190191 1 0 0 0 0
190192 1 0 0 0 0
190193 1 0 0 0 0
193194 1 0 0 0 0
194195 1 0 0 0 0
194196 1 0 0 0 0
194197 1 0 0 0 0
197198 1 0 0 0 0
197199 1 0 0 0 0
197200 1 0 0 0 0
200201 1 0 0 0 0
200205 2 0 0 0 0
201202 1 0 0 0 0
202203 1 0 0 0 0
202204 1 0 0 0 0
202206 1 0 0 0 0
206207 1 0 0 0 0
206208 1 0 0 0 0
206225 1 0 0 0 0
209210 1 0 0 0 0
209211 1 0 0 0 0
209212 1 0 0 0 0
209225 1 0 0 0 0
212213 1 0 0 0 0
212214 1 0 0 0 0
212215 1 0 0 0 0
215216 1 0 0 0 0
216217 1 0 0 0 0
216224 2 0 0 0 0
217218 1 0 0 0 0
217219 1 0 0 0 0
217220 1 0 0 0 0
220221 1 0 0 0 0
220222 1 0 0 0 0
220223 1 0 0 0 0
225226 1 0 0 0 0
225227 1 0 0 0 0

```

```

M END
> <NAME>
JJ20_1

```

```

$$$$
JJ24_1
MOE2012 3D

```

```

232231 0 0 1 0 0 0 0 0999 V2000
27.7670 8.0040 -9.6480 O 0 0 0 0 0 0 0 0 0 0 0 0 0 0 0
27.0100 7.4350 -9.4190 H 0 0 0 0 0 0 0 0 0 0 0 0 0 0 0
28.8670 7.5940 -8.8320 C 0 0 0 0 0 0 0 0 0 0 0 0 0 0 0
28.5990 7.7240 -7.7800 H 0 0 0 0 0 0 0 0 0 0 0 0 0 0 0
29.0530 6.5350 -9.0390 H 0 0 0 0 0 0 0 0 0 0 0 0 0 0 0
30.0820 8.4470 -9.2100 C 0 0 3 0 0 0 0 0 0 0 0 0 0 0 0
29.8610 9.5060 -9.0290 H 0 0 0 0 0 0 0 0 0 0 0 0 0 0 0
31.3270 8.0050 -8.4290 C 0 0 0 0 0 0 0 0 0 0 0 0 0 0 0
31.1050 8.0320 -7.3550 H 0 0 0 0 0 0 0 0 0 0 0 0 0 0 0
31.5860 6.9770 -8.7080 H 0 0 0 0 0 0 0 0 0 0 0 0 0 0 0
32.4720 8.8850 -8.7170 N 0 0 3 0 0 0 0 0 0 0 0 0 0 0 0
32.6510 8.8320 -9.7250 H 0 0 0 0 0 0 0 0 0 0 0 0 0 0 0
30.3030 8.3010 -10.6220 O 0 0 0 0 0 0 0 0 0 0 0 0 0 0 0
29.4120 8.4030 -11.0170 H 0 0 0 0 0 0 0 0 0 0 0 0 0 0 0
33.6500 8.4700 -7.9520 C 0 0 0 0 0 0 0 0 0 0 0 0 0 0 0
33.3880 8.4440 -6.8870 H 0 0 0 0 0 0 0 0 0 0 0 0 0 0 0
33.9520 7.4590 -8.2390 H 0 0 0 0 0 0 0 0 0 0 0 0 0 0 0
34.8200 9.4420 -8.1020 C 0 0 0 0 0 0 0 0 0 0 0 0 0 0 0
34.4770 10.4630 -7.9000 H 0 0 0 0 0 0 0 0 0 0 0 0 0 0 0
35.5860 9.1930 -7.3590 H 0 0 0 0 0 0 0 0 0 0 0 0 0 0 0
35.5020 9.4360 -9.4480 C 0 0 0 0 0 0 0 0 0 0 0 0 0 0 0
35.3630 8.2440 -10.0850 O 0 0 0 0 0 0 0 0 0 0 0 0 0 0 0
35.9580 8.1870 -11.3890 C 0 0 0 0 0 0 0 0 0 0 0 0 0 0 0
35.4250 8.8780 -12.0540 H 0 0 0 0 0 0 0 0 0 0 0 0 0 0 0
37.0150 8.4730 -11.3320 H 0 0 0 0 0 0 0 0 0 0 0 0 0 0 0
36.1460 10.3900 -9.8720 O 0 0 0 0 0 0 0 0 0 0 0 0 0 0 0
35.8340 6.7570 -11.9010 C 0 0 0 0 0 0 0 0 0 0 0 0 0 0 0
36.3770 6.0860 -11.2250 H 0 0 0 0 0 0 0 0 0 0 0 0 0 0 0
34.7840 6.4410 -11.8570 H 0 0 0 0 0 0 0 0 0 0 0 0 0 0 0
36.3330 5.1680 -13.7890 C 0 0 0 0 0 0 0 0 0 0 0 0 0 0 0
35.3170 4.7640 -13.7030 H 0 0 0 0 0 0 0 0 0 0 0 0 0 0 0
36.9600 4.5530 -13.1310 H 0 0 0 0 0 0 0 0 0 0 0 0 0 0 0
36.8110 5.0120 -15.2270 C 0 0 0 0 0 0 0 0 0 0 0 0 0 0 0

```







|     |     |   |   |   |   |   |
|-----|-----|---|---|---|---|---|
| 41  | 58  | 1 | 0 | 0 | 0 | 0 |
| 45  | 46  | 1 | 0 | 0 | 0 | 0 |
| 45  | 47  | 1 | 0 | 0 | 0 | 0 |
| 48  | 49  | 1 | 0 | 0 | 0 | 0 |
| 48  | 50  | 1 | 0 | 0 | 0 | 0 |
| 50  | 51  | 1 | 0 | 0 | 0 | 0 |
| 50  | 52  | 1 | 0 | 0 | 0 | 0 |
| 50  | 53  | 1 | 0 | 0 | 0 | 0 |
| 53  | 54  | 1 | 0 | 0 | 0 | 0 |
| 53  | 55  | 1 | 0 | 0 | 0 | 0 |
| 53  | 59  | 1 | 0 | 0 | 0 | 0 |
| 55  | 56  | 1 | 0 | 0 | 0 | 0 |
| 55  | 57  | 1 | 0 | 0 | 0 | 0 |
| 55  | 58  | 1 | 0 | 0 | 0 | 0 |
| 58  | 61  | 1 | 0 | 0 | 0 | 0 |
| 59  | 60  | 1 | 0 | 0 | 0 | 0 |
| 61  | 62  | 1 | 0 | 0 | 0 | 0 |
| 61  | 63  | 1 | 0 | 0 | 0 | 0 |
| 61  | 64  | 1 | 0 | 0 | 0 | 0 |
| 64  | 65  | 1 | 0 | 0 | 0 | 0 |
| 64  | 66  | 1 | 0 | 0 | 0 | 0 |
| 64  | 67  | 1 | 0 | 0 | 0 | 0 |
| 67  | 68  | 1 | 0 | 0 | 0 | 0 |
| 67  | 72  | 2 | 0 | 0 | 0 | 0 |
| 68  | 69  | 1 | 0 | 0 | 0 | 0 |
| 69  | 70  | 1 | 0 | 0 | 0 | 0 |
| 69  | 71  | 1 | 0 | 0 | 0 | 0 |
| 69  | 73  | 1 | 0 | 0 | 0 | 0 |
| 73  | 74  | 1 | 0 | 0 | 0 | 0 |
| 73  | 75  | 1 | 0 | 0 | 0 | 0 |
| 73  | 91  | 1 | 0 | 0 | 0 | 0 |
| 76  | 77  | 1 | 0 | 0 | 0 | 0 |
| 76  | 78  | 1 | 0 | 0 | 0 | 0 |
| 76  | 79  | 1 | 0 | 0 | 0 | 0 |
| 76  | 91  | 1 | 0 | 0 | 0 | 0 |
| 79  | 80  | 1 | 0 | 0 | 0 | 0 |
| 79  | 81  | 1 | 0 | 0 | 0 | 0 |
| 79  | 82  | 1 | 0 | 0 | 0 | 0 |
| 82  | 83  | 1 | 0 | 0 | 0 | 0 |
| 83  | 84  | 1 | 0 | 0 | 0 | 0 |
| 83  | 90  | 2 | 0 | 0 | 0 | 0 |
| 84  | 85  | 1 | 0 | 0 | 0 | 0 |
| 84  | 86  | 1 | 0 | 0 | 0 | 0 |
| 84  | 87  | 1 | 0 | 0 | 0 | 0 |
| 87  | 88  | 1 | 0 | 0 | 0 | 0 |
| 87  | 89  | 1 | 0 | 0 | 0 | 0 |
| 87  | 104 | 1 | 0 | 0 | 0 | 0 |
| 91  | 92  | 1 | 0 | 0 | 0 | 0 |
| 91  | 93  | 1 | 0 | 0 | 0 | 0 |
| 94  | 95  | 1 | 0 | 0 | 0 | 0 |
| 94  | 96  | 1 | 0 | 0 | 0 | 0 |
| 96  | 97  | 1 | 0 | 0 | 0 | 0 |
| 96  | 98  | 1 | 0 | 0 | 0 | 0 |
| 96  | 99  | 1 | 0 | 0 | 0 | 0 |
| 99  | 100 | 1 | 0 | 0 | 0 | 0 |
| 99  | 101 | 1 | 0 | 0 | 0 | 0 |
| 99  | 105 | 1 | 0 | 0 | 0 | 0 |
| 101 | 102 | 1 | 0 | 0 | 0 | 0 |
| 101 | 103 | 1 | 0 | 0 | 0 | 0 |
| 101 | 104 | 1 | 0 | 0 | 0 | 0 |
| 104 | 107 | 1 | 0 | 0 | 0 | 0 |
| 105 | 106 | 1 | 0 | 0 | 0 | 0 |
| 107 | 108 | 1 | 0 | 0 | 0 | 0 |
| 107 | 109 | 1 | 0 | 0 | 0 | 0 |
| 107 | 110 | 1 | 0 | 0 | 0 | 0 |
| 110 | 111 | 1 | 0 | 0 | 0 | 0 |
| 110 | 112 | 1 | 0 | 0 | 0 | 0 |
| 110 | 113 | 1 | 0 | 0 | 0 | 0 |
| 113 | 114 | 1 | 0 | 0 | 0 | 0 |
| 113 | 118 | 2 | 0 | 0 | 0 | 0 |
| 114 | 115 | 1 | 0 | 0 | 0 | 0 |
| 115 | 116 | 1 | 0 | 0 | 0 | 0 |
| 115 | 117 | 1 | 0 | 0 | 0 | 0 |
| 115 | 119 | 1 | 0 | 0 | 0 | 0 |
| 119 | 120 | 1 | 0 | 0 | 0 | 0 |
| 119 | 121 | 1 | 0 | 0 | 0 | 0 |
| 119 | 137 | 1 | 0 | 0 | 0 | 0 |
| 122 | 123 | 1 | 0 | 0 | 0 | 0 |
| 122 | 124 | 1 | 0 | 0 | 0 | 0 |
| 122 | 125 | 1 | 0 | 0 | 0 | 0 |
| 122 | 137 | 1 | 0 | 0 | 0 | 0 |



|        |   |   |   |   |   |
|--------|---|---|---|---|---|
| 125126 | 1 | 0 | 0 | 0 | 0 |
| 125127 | 1 | 0 | 0 | 0 | 0 |
| 125128 | 1 | 0 | 0 | 0 | 0 |
| 128129 | 1 | 0 | 0 | 0 | 0 |
| 129130 | 1 | 0 | 0 | 0 | 0 |
| 129136 | 2 | 0 | 0 | 0 | 0 |
| 130131 | 1 | 0 | 0 | 0 | 0 |
| 130132 | 1 | 0 | 0 | 0 | 0 |
| 130133 | 1 | 0 | 0 | 0 | 0 |
| 133134 | 1 | 0 | 0 | 0 | 0 |
| 133135 | 1 | 0 | 0 | 0 | 0 |
| 133150 | 1 | 0 | 0 | 0 | 0 |
| 137138 | 1 | 0 | 0 | 0 | 0 |
| 137139 | 1 | 0 | 0 | 0 | 0 |
| 140141 | 1 | 0 | 0 | 0 | 0 |
| 140142 | 1 | 0 | 0 | 0 | 0 |
| 142143 | 1 | 0 | 0 | 0 | 0 |
| 142144 | 1 | 0 | 0 | 0 | 0 |
| 142145 | 1 | 0 | 0 | 0 | 0 |
| 145146 | 1 | 0 | 0 | 0 | 0 |
| 145147 | 1 | 0 | 0 | 0 | 0 |
| 145151 | 1 | 0 | 0 | 0 | 0 |
| 147148 | 1 | 0 | 0 | 0 | 0 |
| 147149 | 1 | 0 | 0 | 0 | 0 |
| 147150 | 1 | 0 | 0 | 0 | 0 |
| 150153 | 1 | 0 | 0 | 0 | 0 |
| 151152 | 1 | 0 | 0 | 0 | 0 |
| 153154 | 1 | 0 | 0 | 0 | 0 |
| 153155 | 1 | 0 | 0 | 0 | 0 |
| 153156 | 1 | 0 | 0 | 0 | 0 |
| 156157 | 1 | 0 | 0 | 0 | 0 |
| 156158 | 1 | 0 | 0 | 0 | 0 |
| 156159 | 1 | 0 | 0 | 0 | 0 |
| 159160 | 1 | 0 | 0 | 0 | 0 |
| 159164 | 2 | 0 | 0 | 0 | 0 |
| 160161 | 1 | 0 | 0 | 0 | 0 |
| 161162 | 1 | 0 | 0 | 0 | 0 |
| 161163 | 1 | 0 | 0 | 0 | 0 |
| 161165 | 1 | 0 | 0 | 0 | 0 |
| 165166 | 1 | 0 | 0 | 0 | 0 |
| 165167 | 1 | 0 | 0 | 0 | 0 |
| 165183 | 1 | 0 | 0 | 0 | 0 |
| 168169 | 1 | 0 | 0 | 0 | 0 |
| 168170 | 1 | 0 | 0 | 0 | 0 |
| 168171 | 1 | 0 | 0 | 0 | 0 |
| 168183 | 1 | 0 | 0 | 0 | 0 |
| 171172 | 1 | 0 | 0 | 0 | 0 |
| 171173 | 1 | 0 | 0 | 0 | 0 |
| 171174 | 1 | 0 | 0 | 0 | 0 |
| 174175 | 1 | 0 | 0 | 0 | 0 |
| 175176 | 1 | 0 | 0 | 0 | 0 |
| 175182 | 2 | 0 | 0 | 0 | 0 |
| 176177 | 1 | 0 | 0 | 0 | 0 |
| 176178 | 1 | 0 | 0 | 0 | 0 |
| 176179 | 1 | 0 | 0 | 0 | 0 |
| 179180 | 1 | 0 | 0 | 0 | 0 |
| 179181 | 1 | 0 | 0 | 0 | 0 |
| 179196 | 1 | 0 | 0 | 0 | 0 |
| 183184 | 1 | 0 | 0 | 0 | 0 |
| 183185 | 1 | 0 | 0 | 0 | 0 |
| 186187 | 1 | 0 | 0 | 0 | 0 |
| 186188 | 1 | 0 | 0 | 0 | 0 |
| 188189 | 1 | 0 | 0 | 0 | 0 |
| 188190 | 1 | 0 | 0 | 0 | 0 |
| 188191 | 1 | 0 | 0 | 0 | 0 |
| 191192 | 1 | 0 | 0 | 0 | 0 |
| 191193 | 1 | 0 | 0 | 0 | 0 |
| 191197 | 1 | 0 | 0 | 0 | 0 |
| 193194 | 1 | 0 | 0 | 0 | 0 |
| 193195 | 1 | 0 | 0 | 0 | 0 |
| 193196 | 1 | 0 | 0 | 0 | 0 |
| 196199 | 1 | 0 | 0 | 0 | 0 |
| 197198 | 1 | 0 | 0 | 0 | 0 |
| 199200 | 1 | 0 | 0 | 0 | 0 |
| 199201 | 1 | 0 | 0 | 0 | 0 |
| 199202 | 1 | 0 | 0 | 0 | 0 |
| 202203 | 1 | 0 | 0 | 0 | 0 |
| 202204 | 1 | 0 | 0 | 0 | 0 |
| 202205 | 1 | 0 | 0 | 0 | 0 |
| 205206 | 1 | 0 | 0 | 0 | 0 |
| 205210 | 2 | 0 | 0 | 0 | 0 |

206207 1 0 0 0 0  
207208 1 0 0 0 0  
207209 1 0 0 0 0  
207211 1 0 0 0 0  
211212 1 0 0 0 0  
211213 1 0 0 0 0  
211230 1 0 0 0 0  
214215 1 0 0 0 0  
214216 1 0 0 0 0  
214217 1 0 0 0 0  
214230 1 0 0 0 0  
217218 1 0 0 0 0  
217219 1 0 0 0 0  
217220 1 0 0 0 0  
220221 1 0 0 0 0  
221222 1 0 0 0 0  
221229 2 0 0 0 0  
222223 1 0 0 0 0  
222224 1 0 0 0 0  
222225 1 0 0 0 0  
225226 1 0 0 0 0  
225227 1 0 0 0 0  
225228 1 0 0 0 0  
230231 1 0 0 0 0  
230232 1 0 0 0 0

M END  
> <NAME>  
JJ24\_1

\$\$\$  
JJ28\_1  
MOE2012 3D

242241 0 0 1 0 0 0 0 0999 V2000  
6.7480 13.8140 -19.6260 O 0 0 0 0 0 0 0 0 0 0 0 0 0 0 0 0  
6.0860 14.5220 -19.5480 H 0 0 0 0 0 0 0 0 0 0 0 0 0 0 0 0  
7.0330 13.3630 -18.3090 C 0 0 0 0 0 0 0 0 0 0 0 0 0 0 0 0  
7.4060 14.2100 -17.7240 H 0 0 0 0 0 0 0 0 0 0 0 0 0 0 0 0  
6.1060 12.9980 -17.8570 H 0 0 0 0 0 0 0 0 0 0 0 0 0 0 0 0  
8.0750 12.2560 -18.3860 C 0 0 0 0 0 0 0 0 0 0 0 0 0 0 0 0  
7.6970 11.4470 -19.0250 H 0 0 0 0 0 0 0 0 0 0 0 0 0 0 0 0  
8.9730 12.6380 -18.8870 H 0 0 0 0 0 0 0 0 0 0 0 0 0 0 0 0  
8.4290 11.7150 -17.0020 C 0 0 0 0 0 0 0 0 0 0 0 0 0 0 0 0  
8.8050 12.5330 -16.3750 H 0 0 0 0 0 0 0 0 0 0 0 0 0 0 0 0  
7.5220 11.3280 -16.5190 H 0 0 0 0 0 0 0 0 0 0 0 0 0 0 0 0  
9.4820 10.6090 -17.0950 C 0 0 0 0 0 0 0 0 0 0 0 0 0 0 0 0  
9.1000 9.7910 -17.7180 H 0 0 0 0 0 0 0 0 0 0 0 0 0 0 0 0  
10.3850 11.0080 -17.5730 H 0 0 0 0 0 0 0 0 0 0 0 0 0 0 0 0  
9.8020 10.1170 -15.7540 N 0 0 3 0 0 0 0 0 0 0 0 0 0 0 0 0  
8.9530 9.7640 -15.3110 H 0 0 0 0 0 0 0 0 0 0 0 0 0 0 0 0  
10.8080 9.0540 -15.8130 C 0 0 0 0 0 0 0 0 0 0 0 0 0 0 0 0  
10.4360 8.2130 -16.4120 H 0 0 0 0 0 0 0 0 0 0 0 0 0 0 0 0  
11.7190 9.4280 -16.2960 H 0 0 0 0 0 0 0 0 0 0 0 0 0 0 0 0  
11.1430 8.5740 -14.4030 C 0 0 0 0 0 0 0 0 0 0 0 0 0 0 0 0  
11.5370 9.4050 -13.8060 H 0 0 0 0 0 0 0 0 0 0 0 0 0 0 0 0  
10.2450 8.1750 -13.9170 H 0 0 0 0 0 0 0 0 0 0 0 0 0 0 0 0  
12.1840 7.4830 -14.4400 C 0 0 0 0 0 0 0 0 0 0 0 0 0 0 0 0  
12.4610 7.0810 -13.1670 O 0 0 0 0 0 0 0 0 0 0 0 0 0 0 0 0  
13.4370 6.0330 -13.0630 C 0 0 0 0 0 0 0 0 0 0 0 0 0 0 0 0  
13.0890 5.1540 -13.6170 H 0 0 0 0 0 0 0 0 0 0 0 0 0 0 0 0  
14.3890 6.3800 -13.4800 H 0 0 0 0 0 0 0 0 0 0 0 0 0 0 0 0  
12.6920 7.0290 -15.4550 O 0 0 0 0 0 0 0 0 0 0 0 0 0 0 0 0  
13.6010 5.6930 -11.5850 C 0 0 0 0 0 0 0 0 0 0 0 0 0 0 0 0  
13.9050 6.5940 -11.0380 H 0 0 0 0 0 0 0 0 0 0 0 0 0 0 0 0  
12.6260 5.4060 -11.1710 H 0 0 0 0 0 0 0 0 0 0 0 0 0 0 0 0  
14.7560 4.2420 -9.8780 C 0 0 0 0 0 0 0 0 0 0 0 0 0 0 0 0  
13.7830 3.9540 -9.4620 H 0 0 0 0 0 0 0 0 0 0 0 0 0 0 0 0  
15.0690 5.1330 -9.3190 H 0 0 0 0 0 0 0 0 0 0 0 0 0 0 0 0  
15.7580 3.1180 -9.6330 C 0 0 0 0 0 0 0 0 0 0 0 0 0 0 0 0  
15.4370 2.2060 -10.1500 H 0 0 0 0 0 0 0 0 0 0 0 0 0 0 0 0  
16.7530 3.4110 -9.9850 H 0 0 0 0 0 0 0 0 0 0 0 0 0 0 0 0  
15.8080 2.8750 -8.2190 O 0 0 0 0 0 0 0 0 0 0 0 0 0 0 0 0  
16.6170 1.8480 -7.8380 C 0 0 0 0 0 0 0 0 0 0 0 0 0 0 0 0  
16.5750 1.7040 -6.3370 C 0 0 0 0 0 0 0 0 0 0 0 0 0 0 0 0  
17.1940 2.4990 -5.9100 H 0 0 0 0 0 0 0 0 0 0 0 0 0 0 0 0  
15.5390 1.8330 -6.0020 H 0 0 0 0 0 0 0 0 0 0 0 0 0 0 0 0  
17.0760 0.3190 -5.9270 C 0 0 0 0 0 0 0 0 0 0 0 0 0 0 0 0  
16.5030 -0.4180 -6.5060 H 0 0 0 0 0 0 0 0 0 0 0 0 0 0 0 0  
18.1220 0.2020 -6.2320 H 0 0 0 0 0 0 0 0 0 0 0 0 0 0 0 0  
17.2960 1.1620 -8.5890 O 0 0 0 0 0 0 0 0 0 0 0 0 0 0 0 0  
14.6170 4.5730 -11.3630 C 0 0 0 0 0 0 0 0 0 0 0 0 0 0 0 0







|     |     |   |   |   |   |   |
|-----|-----|---|---|---|---|---|
| 47  | 49  | 1 | 0 | 0 | 0 | 0 |
| 50  | 51  | 1 | 0 | 0 | 0 | 0 |
| 50  | 52  | 1 | 0 | 0 | 0 | 0 |
| 52  | 53  | 1 | 0 | 0 | 0 | 0 |
| 52  | 54  | 1 | 0 | 0 | 0 | 0 |
| 52  | 55  | 1 | 0 | 0 | 0 | 0 |
| 55  | 56  | 1 | 0 | 0 | 0 | 0 |
| 55  | 57  | 1 | 0 | 0 | 0 | 0 |
| 55  | 58  | 1 | 0 | 0 | 0 | 0 |
| 58  | 59  | 1 | 0 | 0 | 0 | 0 |
| 58  | 60  | 1 | 0 | 0 | 0 | 0 |
| 58  | 61  | 1 | 0 | 0 | 0 | 0 |
| 61  | 62  | 1 | 0 | 0 | 0 | 0 |
| 61  | 63  | 1 | 0 | 0 | 0 | 0 |
| 61  | 64  | 1 | 0 | 0 | 0 | 0 |
| 64  | 65  | 1 | 0 | 0 | 0 | 0 |
| 65  | 66  | 1 | 0 | 0 | 0 | 0 |
| 65  | 67  | 1 | 0 | 0 | 0 | 0 |
| 65  | 68  | 1 | 0 | 0 | 0 | 0 |
| 68  | 69  | 1 | 0 | 0 | 0 | 0 |
| 68  | 70  | 1 | 0 | 0 | 0 | 0 |
| 68  | 71  | 1 | 0 | 0 | 0 | 0 |
| 71  | 72  | 1 | 0 | 0 | 0 | 0 |
| 71  | 76  | 2 | 0 | 0 | 0 | 0 |
| 72  | 73  | 1 | 0 | 0 | 0 | 0 |
| 73  | 74  | 1 | 0 | 0 | 0 | 0 |
| 73  | 75  | 1 | 0 | 0 | 0 | 0 |
| 73  | 77  | 1 | 0 | 0 | 0 | 0 |
| 77  | 78  | 1 | 0 | 0 | 0 | 0 |
| 77  | 79  | 1 | 0 | 0 | 0 | 0 |
| 77  | 95  | 1 | 0 | 0 | 0 | 0 |
| 80  | 81  | 1 | 0 | 0 | 0 | 0 |
| 80  | 82  | 1 | 0 | 0 | 0 | 0 |
| 80  | 83  | 1 | 0 | 0 | 0 | 0 |
| 80  | 95  | 1 | 0 | 0 | 0 | 0 |
| 83  | 84  | 1 | 0 | 0 | 0 | 0 |
| 83  | 85  | 1 | 0 | 0 | 0 | 0 |
| 83  | 86  | 1 | 0 | 0 | 0 | 0 |
| 86  | 87  | 1 | 0 | 0 | 0 | 0 |
| 87  | 88  | 1 | 0 | 0 | 0 | 0 |
| 87  | 94  | 2 | 0 | 0 | 0 | 0 |
| 88  | 89  | 1 | 0 | 0 | 0 | 0 |
| 88  | 90  | 1 | 0 | 0 | 0 | 0 |
| 88  | 91  | 1 | 0 | 0 | 0 | 0 |
| 91  | 92  | 1 | 0 | 0 | 0 | 0 |
| 91  | 93  | 1 | 0 | 0 | 0 | 0 |
| 91  | 112 | 1 | 0 | 0 | 0 | 0 |
| 95  | 96  | 1 | 0 | 0 | 0 | 0 |
| 95  | 97  | 1 | 0 | 0 | 0 | 0 |
| 98  | 99  | 1 | 0 | 0 | 0 | 0 |
| 98  | 100 | 1 | 0 | 0 | 0 | 0 |
| 100 | 101 | 1 | 0 | 0 | 0 | 0 |
| 100 | 102 | 1 | 0 | 0 | 0 | 0 |
| 100 | 103 | 1 | 0 | 0 | 0 | 0 |
| 103 | 104 | 1 | 0 | 0 | 0 | 0 |
| 103 | 105 | 1 | 0 | 0 | 0 | 0 |
| 103 | 106 | 1 | 0 | 0 | 0 | 0 |
| 106 | 107 | 1 | 0 | 0 | 0 | 0 |
| 106 | 108 | 1 | 0 | 0 | 0 | 0 |
| 106 | 109 | 1 | 0 | 0 | 0 | 0 |
| 109 | 110 | 1 | 0 | 0 | 0 | 0 |
| 109 | 111 | 1 | 0 | 0 | 0 | 0 |
| 109 | 112 | 1 | 0 | 0 | 0 | 0 |
| 112 | 113 | 1 | 0 | 0 | 0 | 0 |
| 113 | 114 | 1 | 0 | 0 | 0 | 0 |
| 113 | 115 | 1 | 0 | 0 | 0 | 0 |
| 113 | 116 | 1 | 0 | 0 | 0 | 0 |
| 116 | 117 | 1 | 0 | 0 | 0 | 0 |
| 116 | 118 | 1 | 0 | 0 | 0 | 0 |
| 116 | 119 | 1 | 0 | 0 | 0 | 0 |
| 119 | 120 | 1 | 0 | 0 | 0 | 0 |
| 119 | 124 | 2 | 0 | 0 | 0 | 0 |
| 120 | 121 | 1 | 0 | 0 | 0 | 0 |
| 121 | 122 | 1 | 0 | 0 | 0 | 0 |
| 121 | 123 | 1 | 0 | 0 | 0 | 0 |
| 121 | 125 | 1 | 0 | 0 | 0 | 0 |
| 125 | 126 | 1 | 0 | 0 | 0 | 0 |
| 125 | 127 | 1 | 0 | 0 | 0 | 0 |
| 125 | 143 | 1 | 0 | 0 | 0 | 0 |
| 128 | 129 | 1 | 0 | 0 | 0 | 0 |
| 128 | 130 | 1 | 0 | 0 | 0 | 0 |

|        |   |   |   |   |   |
|--------|---|---|---|---|---|
| 128131 | 1 | 0 | 0 | 0 | 0 |
| 128143 | 1 | 0 | 0 | 0 | 0 |
| 131132 | 1 | 0 | 0 | 0 | 0 |
| 131133 | 1 | 0 | 0 | 0 | 0 |
| 131134 | 1 | 0 | 0 | 0 | 0 |
| 134135 | 1 | 0 | 0 | 0 | 0 |
| 135136 | 1 | 0 | 0 | 0 | 0 |
| 135142 | 2 | 0 | 0 | 0 | 0 |
| 136137 | 1 | 0 | 0 | 0 | 0 |
| 136138 | 1 | 0 | 0 | 0 | 0 |
| 136139 | 1 | 0 | 0 | 0 | 0 |
| 139140 | 1 | 0 | 0 | 0 | 0 |
| 139141 | 1 | 0 | 0 | 0 | 0 |
| 139160 | 1 | 0 | 0 | 0 | 0 |
| 143144 | 1 | 0 | 0 | 0 | 0 |
| 143145 | 1 | 0 | 0 | 0 | 0 |
| 146147 | 1 | 0 | 0 | 0 | 0 |
| 146148 | 1 | 0 | 0 | 0 | 0 |
| 148149 | 1 | 0 | 0 | 0 | 0 |
| 148150 | 1 | 0 | 0 | 0 | 0 |
| 148151 | 1 | 0 | 0 | 0 | 0 |
| 151152 | 1 | 0 | 0 | 0 | 0 |
| 151153 | 1 | 0 | 0 | 0 | 0 |
| 151154 | 1 | 0 | 0 | 0 | 0 |
| 154155 | 1 | 0 | 0 | 0 | 0 |
| 154156 | 1 | 0 | 0 | 0 | 0 |
| 154157 | 1 | 0 | 0 | 0 | 0 |
| 157158 | 1 | 0 | 0 | 0 | 0 |
| 157159 | 1 | 0 | 0 | 0 | 0 |
| 157160 | 1 | 0 | 0 | 0 | 0 |
| 160161 | 1 | 0 | 0 | 0 | 0 |
| 161162 | 1 | 0 | 0 | 0 | 0 |
| 161163 | 1 | 0 | 0 | 0 | 0 |
| 161164 | 1 | 0 | 0 | 0 | 0 |
| 164165 | 1 | 0 | 0 | 0 | 0 |
| 164166 | 1 | 0 | 0 | 0 | 0 |
| 164167 | 1 | 0 | 0 | 0 | 0 |
| 167168 | 1 | 0 | 0 | 0 | 0 |
| 167172 | 2 | 0 | 0 | 0 | 0 |
| 168169 | 1 | 0 | 0 | 0 | 0 |
| 169170 | 1 | 0 | 0 | 0 | 0 |
| 169171 | 1 | 0 | 0 | 0 | 0 |
| 169173 | 1 | 0 | 0 | 0 | 0 |
| 173174 | 1 | 0 | 0 | 0 | 0 |
| 173175 | 1 | 0 | 0 | 0 | 0 |
| 173191 | 1 | 0 | 0 | 0 | 0 |
| 176177 | 1 | 0 | 0 | 0 | 0 |
| 176178 | 1 | 0 | 0 | 0 | 0 |
| 176179 | 1 | 0 | 0 | 0 | 0 |
| 176191 | 1 | 0 | 0 | 0 | 0 |
| 179180 | 1 | 0 | 0 | 0 | 0 |
| 179181 | 1 | 0 | 0 | 0 | 0 |
| 179182 | 1 | 0 | 0 | 0 | 0 |
| 182183 | 1 | 0 | 0 | 0 | 0 |
| 183184 | 1 | 0 | 0 | 0 | 0 |
| 183190 | 2 | 0 | 0 | 0 | 0 |
| 184185 | 1 | 0 | 0 | 0 | 0 |
| 184186 | 1 | 0 | 0 | 0 | 0 |
| 184187 | 1 | 0 | 0 | 0 | 0 |
| 187188 | 1 | 0 | 0 | 0 | 0 |
| 187189 | 1 | 0 | 0 | 0 | 0 |
| 187208 | 1 | 0 | 0 | 0 | 0 |
| 191192 | 1 | 0 | 0 | 0 | 0 |
| 191193 | 1 | 0 | 0 | 0 | 0 |
| 194195 | 1 | 0 | 0 | 0 | 0 |
| 194196 | 1 | 0 | 0 | 0 | 0 |
| 196197 | 1 | 0 | 0 | 0 | 0 |
| 196198 | 1 | 0 | 0 | 0 | 0 |
| 196199 | 1 | 0 | 0 | 0 | 0 |
| 199200 | 1 | 0 | 0 | 0 | 0 |
| 199201 | 1 | 0 | 0 | 0 | 0 |
| 199202 | 1 | 0 | 0 | 0 | 0 |
| 202203 | 1 | 0 | 0 | 0 | 0 |
| 202204 | 1 | 0 | 0 | 0 | 0 |
| 202205 | 1 | 0 | 0 | 0 | 0 |
| 205206 | 1 | 0 | 0 | 0 | 0 |
| 205207 | 1 | 0 | 0 | 0 | 0 |
| 205208 | 1 | 0 | 0 | 0 | 0 |
| 208209 | 1 | 0 | 0 | 0 | 0 |
| 209210 | 1 | 0 | 0 | 0 | 0 |
| 209211 | 1 | 0 | 0 | 0 | 0 |

209212 1 0 0 0 0  
212213 1 0 0 0 0  
212214 1 0 0 0 0  
212215 1 0 0 0 0  
215216 1 0 0 0 0  
215220 2 0 0 0 0  
216217 1 0 0 0 0  
217218 1 0 0 0 0  
217219 1 0 0 0 0  
217221 1 0 0 0 0  
221222 1 0 0 0 0  
221223 1 0 0 0 0  
221240 1 0 0 0 0  
224225 1 0 0 0 0  
224226 1 0 0 0 0  
224227 1 0 0 0 0  
224240 1 0 0 0 0  
227228 1 0 0 0 0  
227229 1 0 0 0 0  
227230 1 0 0 0 0  
230231 1 0 0 0 0  
231232 1 0 0 0 0  
231239 2 0 0 0 0  
232233 1 0 0 0 0  
232234 1 0 0 0 0  
232235 1 0 0 0 0  
235236 1 0 0 0 0  
235237 1 0 0 0 0  
235238 1 0 0 0 0  
240241 1 0 0 0 0  
240242 1 0 0 0 0

M END  
> <NAME>  
JJ28\_1

\$\$\$\$  
JJ32\_1  
MOE2012 3D

257256 0 0 1 0 0 0 0 0999 V2000  
37.9560 16.1710 -13.5870 O 0 0 0 0 0 0 0 0 0 0 0 0 0 0 0  
38.9200 16.0670 -13.6630 H 0 0 0 0 0 0 0 0 0 0 0 0 0 0 0  
37.5810 17.2090 -14.4810 C 0 0 0 0 0 0 0 0 0 0 0 0 0 0 0  
38.1040 18.1250 -14.1900 H 0 0 0 0 0 0 0 0 0 0 0 0 0 0 0  
37.8920 16.9270 -15.4920 H 0 0 0 0 0 0 0 0 0 0 0 0 0 0 0  
36.0720 17.4000 -14.4110 C 0 0 0 0 0 0 0 0 0 0 0 0 0 0 0  
35.5750 16.4530 -14.6570 H 0 0 0 0 0 0 0 0 0 0 0 0 0 0 0  
35.7820 17.6310 -13.3780 H 0 0 0 0 0 0 0 0 0 0 0 0 0 0 0  
35.6020 18.5060 -15.3530 C 0 0 0 0 0 0 0 0 0 0 0 0 0 0 0  
36.1000 19.4470 -15.0920 H 0 0 0 0 0 0 0 0 0 0 0 0 0 0 0  
35.8940 18.2600 -16.3820 H 0 0 0 0 0 0 0 0 0 0 0 0 0 0 0  
34.0850 18.6930 -15.2840 C 0 0 0 0 0 0 0 0 0 0 0 0 0 0 0  
33.5890 17.7490 -15.5440 H 0 0 0 0 0 0 0 0 0 0 0 0 0 0 0  
33.7930 18.9380 -14.2550 H 0 0 0 0 0 0 0 0 0 0 0 0 0 0 0  
33.6230 19.8020 -16.2320 C 0 0 0 0 0 0 0 0 0 0 0 0 0 0 0  
34.1210 20.7400 -15.9610 H 0 0 0 0 0 0 0 0 0 0 0 0 0 0 0  
33.9090 19.5470 -17.2590 H 0 0 0 0 0 0 0 0 0 0 0 0 0 0 0  
32.1710 19.9620 -16.1350 N 0 0 0 3 0 0 0 0 0 0 0 0 0 0 0  
31.7150 19.0780 -16.3610 H 0 0 0 0 0 0 0 0 0 0 0 0 0 0 0  
31.6960 21.0120 -17.0400 C 0 0 0 0 0 0 0 0 0 0 0 0 0 0 0  
32.2050 21.9580 -16.8170 H 0 0 0 0 0 0 0 0 0 0 0 0 0 0 0  
31.9320 20.7410 -18.0760 H 0 0 0 0 0 0 0 0 0 0 0 0 0 0 0  
30.1890 21.1950 -16.9150 C 0 0 0 0 0 0 0 0 0 0 0 0 0 0 0  
29.8180 21.8580 -17.7050 H 0 0 0 0 0 0 0 0 0 0 0 0 0 0 0  
29.6580 20.2440 -17.0380 H 0 0 0 0 0 0 0 0 0 0 0 0 0 0 0  
29.8330 21.8300 -15.5960 C 0 0 0 0 0 0 0 0 0 0 0 0 0 0 0  
29.2100 20.9280 -14.7890 O 0 0 0 0 0 0 0 0 0 0 0 0 0 0 0  
28.8710 21.4180 -13.4840 C 0 0 0 0 0 0 0 0 0 0 0 0 0 0 0  
29.7760 21.7740 -12.9790 H 0 0 0 0 0 0 0 0 0 0 0 0 0 0 0  
28.1540 22.2410 -13.5800 H 0 0 0 0 0 0 0 0 0 0 0 0 0 0 0  
30.0830 22.9930 -15.3080 O 0 0 0 0 0 0 0 0 0 0 0 0 0 0 0  
28.2510 20.2650 -12.7020 C 0 0 0 0 0 0 0 0 0 0 0 0 0 0 0  
27.3750 19.8900 -13.2460 H 0 0 0 0 0 0 0 0 0 0 0 0 0 0 0  
28.9610 19.4290 -12.6680 H 0 0 0 0 0 0 0 0 0 0 0 0 0 0 0  
27.2380 19.5070 -10.5240 C 0 0 0 0 0 0 0 0 0 0 0 0 0 0 0  
27.9450 18.6690 -10.4790 H 0 0 0 0 0 0 0 0 0 0 0 0 0 0 0  
26.3590 19.1290 -11.0610 H 0 0 0 0 0 0 0 0 0 0 0 0 0 0 0  
26.8300 19.8970 -9.1080 C 0 0 0 0 0 0 0 0 0 0 0 0 0 0 0  
27.7070 20.2180 -8.5330 H 0 0 0 0 0 0 0 0 0 0 0 0 0 0 0  
26.0920 20.7070 -9.1360 H 0 0 0 0 0 0 0 0 0 0 0 0 0 0 0  
26.2520 18.7410 -8.4840 O 0 0 0 0 0 0 0 0 0 0 0 0 0 0 0









|     |     |   |   |   |   |   |
|-----|-----|---|---|---|---|---|
| 27  | 28  | 1 | 0 | 0 | 0 | 0 |
| 28  | 29  | 1 | 0 | 0 | 0 | 0 |
| 28  | 30  | 1 | 0 | 0 | 0 | 0 |
| 28  | 32  | 1 | 0 | 0 | 0 | 0 |
| 32  | 33  | 1 | 0 | 0 | 0 | 0 |
| 32  | 34  | 1 | 0 | 0 | 0 | 0 |
| 32  | 50  | 1 | 0 | 0 | 0 | 0 |
| 35  | 36  | 1 | 0 | 0 | 0 | 0 |
| 35  | 37  | 1 | 0 | 0 | 0 | 0 |
| 35  | 38  | 1 | 0 | 0 | 0 | 0 |
| 35  | 50  | 1 | 0 | 0 | 0 | 0 |
| 38  | 39  | 1 | 0 | 0 | 0 | 0 |
| 38  | 40  | 1 | 0 | 0 | 0 | 0 |
| 38  | 41  | 1 | 0 | 0 | 0 | 0 |
| 41  | 42  | 1 | 0 | 0 | 0 | 0 |
| 42  | 43  | 1 | 0 | 0 | 0 | 0 |
| 42  | 49  | 2 | 0 | 0 | 0 | 0 |
| 43  | 44  | 1 | 0 | 0 | 0 | 0 |
| 43  | 45  | 1 | 0 | 0 | 0 | 0 |
| 43  | 46  | 1 | 0 | 0 | 0 | 0 |
| 46  | 47  | 1 | 0 | 0 | 0 | 0 |
| 46  | 48  | 1 | 0 | 0 | 0 | 0 |
| 46  | 70  | 1 | 0 | 0 | 0 | 0 |
| 50  | 51  | 1 | 0 | 0 | 0 | 0 |
| 50  | 52  | 1 | 0 | 0 | 0 | 0 |
| 53  | 54  | 1 | 0 | 0 | 0 | 0 |
| 53  | 55  | 1 | 0 | 0 | 0 | 0 |
| 55  | 56  | 1 | 0 | 0 | 0 | 0 |
| 55  | 57  | 1 | 0 | 0 | 0 | 0 |
| 55  | 58  | 1 | 0 | 0 | 0 | 0 |
| 58  | 59  | 1 | 0 | 0 | 0 | 0 |
| 58  | 60  | 1 | 0 | 0 | 0 | 0 |
| 58  | 61  | 1 | 0 | 0 | 0 | 0 |
| 61  | 62  | 1 | 0 | 0 | 0 | 0 |
| 61  | 63  | 1 | 0 | 0 | 0 | 0 |
| 61  | 64  | 1 | 0 | 0 | 0 | 0 |
| 64  | 65  | 1 | 0 | 0 | 0 | 0 |
| 64  | 66  | 1 | 0 | 0 | 0 | 0 |
| 64  | 67  | 1 | 0 | 0 | 0 | 0 |
| 67  | 68  | 1 | 0 | 0 | 0 | 0 |
| 67  | 69  | 1 | 0 | 0 | 0 | 0 |
| 67  | 70  | 1 | 0 | 0 | 0 | 0 |
| 70  | 71  | 1 | 0 | 0 | 0 | 0 |
| 71  | 72  | 1 | 0 | 0 | 0 | 0 |
| 71  | 73  | 1 | 0 | 0 | 0 | 0 |
| 71  | 74  | 1 | 0 | 0 | 0 | 0 |
| 74  | 75  | 1 | 0 | 0 | 0 | 0 |
| 74  | 76  | 1 | 0 | 0 | 0 | 0 |
| 74  | 77  | 1 | 0 | 0 | 0 | 0 |
| 77  | 78  | 1 | 0 | 0 | 0 | 0 |
| 77  | 82  | 2 | 0 | 0 | 0 | 0 |
| 78  | 79  | 1 | 0 | 0 | 0 | 0 |
| 79  | 80  | 1 | 0 | 0 | 0 | 0 |
| 79  | 81  | 1 | 0 | 0 | 0 | 0 |
| 79  | 83  | 1 | 0 | 0 | 0 | 0 |
| 83  | 84  | 1 | 0 | 0 | 0 | 0 |
| 83  | 85  | 1 | 0 | 0 | 0 | 0 |
| 83  | 101 | 1 | 0 | 0 | 0 | 0 |
| 86  | 87  | 1 | 0 | 0 | 0 | 0 |
| 86  | 88  | 1 | 0 | 0 | 0 | 0 |
| 86  | 89  | 1 | 0 | 0 | 0 | 0 |
| 86  | 101 | 1 | 0 | 0 | 0 | 0 |
| 89  | 90  | 1 | 0 | 0 | 0 | 0 |
| 89  | 91  | 1 | 0 | 0 | 0 | 0 |
| 89  | 92  | 1 | 0 | 0 | 0 | 0 |
| 92  | 93  | 1 | 0 | 0 | 0 | 0 |
| 93  | 94  | 1 | 0 | 0 | 0 | 0 |
| 93  | 100 | 2 | 0 | 0 | 0 | 0 |
| 94  | 95  | 1 | 0 | 0 | 0 | 0 |
| 94  | 96  | 1 | 0 | 0 | 0 | 0 |
| 94  | 97  | 1 | 0 | 0 | 0 | 0 |
| 97  | 98  | 1 | 0 | 0 | 0 | 0 |
| 97  | 99  | 1 | 0 | 0 | 0 | 0 |
| 97  | 121 | 1 | 0 | 0 | 0 | 0 |
| 101 | 102 | 1 | 0 | 0 | 0 | 0 |
| 101 | 103 | 1 | 0 | 0 | 0 | 0 |
| 104 | 105 | 1 | 0 | 0 | 0 | 0 |
| 104 | 106 | 1 | 0 | 0 | 0 | 0 |
| 106 | 107 | 1 | 0 | 0 | 0 | 0 |
| 106 | 108 | 1 | 0 | 0 | 0 | 0 |
| 106 | 109 | 1 | 0 | 0 | 0 | 0 |

|        |   |   |   |   |   |
|--------|---|---|---|---|---|
| 109110 | 1 | 0 | 0 | 0 | 0 |
| 109111 | 1 | 0 | 0 | 0 | 0 |
| 109112 | 1 | 0 | 0 | 0 | 0 |
| 112113 | 1 | 0 | 0 | 0 | 0 |
| 112114 | 1 | 0 | 0 | 0 | 0 |
| 112115 | 1 | 0 | 0 | 0 | 0 |
| 115116 | 1 | 0 | 0 | 0 | 0 |
| 115117 | 1 | 0 | 0 | 0 | 0 |
| 115118 | 1 | 0 | 0 | 0 | 0 |
| 118119 | 1 | 0 | 0 | 0 | 0 |
| 118120 | 1 | 0 | 0 | 0 | 0 |
| 118121 | 1 | 0 | 0 | 0 | 0 |
| 121122 | 1 | 0 | 0 | 0 | 0 |
| 122123 | 1 | 0 | 0 | 0 | 0 |
| 122124 | 1 | 0 | 0 | 0 | 0 |
| 122125 | 1 | 0 | 0 | 0 | 0 |
| 125126 | 1 | 0 | 0 | 0 | 0 |
| 125127 | 1 | 0 | 0 | 0 | 0 |
| 125128 | 1 | 0 | 0 | 0 | 0 |
| 128129 | 1 | 0 | 0 | 0 | 0 |
| 128133 | 2 | 0 | 0 | 0 | 0 |
| 129130 | 1 | 0 | 0 | 0 | 0 |
| 130131 | 1 | 0 | 0 | 0 | 0 |
| 130132 | 1 | 0 | 0 | 0 | 0 |
| 130134 | 1 | 0 | 0 | 0 | 0 |
| 134135 | 1 | 0 | 0 | 0 | 0 |
| 134136 | 1 | 0 | 0 | 0 | 0 |
| 134152 | 1 | 0 | 0 | 0 | 0 |
| 137138 | 1 | 0 | 0 | 0 | 0 |
| 137139 | 1 | 0 | 0 | 0 | 0 |
| 137140 | 1 | 0 | 0 | 0 | 0 |
| 137152 | 1 | 0 | 0 | 0 | 0 |
| 140141 | 1 | 0 | 0 | 0 | 0 |
| 140142 | 1 | 0 | 0 | 0 | 0 |
| 140143 | 1 | 0 | 0 | 0 | 0 |
| 143144 | 1 | 0 | 0 | 0 | 0 |
| 144145 | 1 | 0 | 0 | 0 | 0 |
| 144151 | 2 | 0 | 0 | 0 | 0 |
| 145146 | 1 | 0 | 0 | 0 | 0 |
| 145147 | 1 | 0 | 0 | 0 | 0 |
| 145148 | 1 | 0 | 0 | 0 | 0 |
| 148149 | 1 | 0 | 0 | 0 | 0 |
| 148150 | 1 | 0 | 0 | 0 | 0 |
| 148172 | 1 | 0 | 0 | 0 | 0 |
| 152153 | 1 | 0 | 0 | 0 | 0 |
| 152154 | 1 | 0 | 0 | 0 | 0 |
| 155156 | 1 | 0 | 0 | 0 | 0 |
| 155157 | 1 | 0 | 0 | 0 | 0 |
| 157158 | 1 | 0 | 0 | 0 | 0 |
| 157159 | 1 | 0 | 0 | 0 | 0 |
| 157160 | 1 | 0 | 0 | 0 | 0 |
| 160161 | 1 | 0 | 0 | 0 | 0 |
| 160162 | 1 | 0 | 0 | 0 | 0 |
| 160163 | 1 | 0 | 0 | 0 | 0 |
| 163164 | 1 | 0 | 0 | 0 | 0 |
| 163165 | 1 | 0 | 0 | 0 | 0 |
| 163166 | 1 | 0 | 0 | 0 | 0 |
| 166167 | 1 | 0 | 0 | 0 | 0 |
| 166168 | 1 | 0 | 0 | 0 | 0 |
| 166169 | 1 | 0 | 0 | 0 | 0 |
| 169170 | 1 | 0 | 0 | 0 | 0 |
| 169171 | 1 | 0 | 0 | 0 | 0 |
| 169172 | 1 | 0 | 0 | 0 | 0 |
| 172173 | 1 | 0 | 0 | 0 | 0 |
| 173174 | 1 | 0 | 0 | 0 | 0 |
| 173175 | 1 | 0 | 0 | 0 | 0 |
| 173176 | 1 | 0 | 0 | 0 | 0 |
| 176177 | 1 | 0 | 0 | 0 | 0 |
| 176178 | 1 | 0 | 0 | 0 | 0 |
| 176179 | 1 | 0 | 0 | 0 | 0 |
| 179180 | 1 | 0 | 0 | 0 | 0 |
| 179184 | 2 | 0 | 0 | 0 | 0 |
| 180181 | 1 | 0 | 0 | 0 | 0 |
| 181182 | 1 | 0 | 0 | 0 | 0 |
| 181183 | 1 | 0 | 0 | 0 | 0 |
| 181185 | 1 | 0 | 0 | 0 | 0 |
| 185186 | 1 | 0 | 0 | 0 | 0 |
| 185187 | 1 | 0 | 0 | 0 | 0 |
| 185203 | 1 | 0 | 0 | 0 | 0 |
| 188189 | 1 | 0 | 0 | 0 | 0 |
| 188190 | 1 | 0 | 0 | 0 | 0 |

```

188191 1 0 0 0 0
188203 1 0 0 0 0
191192 1 0 0 0 0
191193 1 0 0 0 0
191194 1 0 0 0 0
194195 1 0 0 0 0
195196 1 0 0 0 0
195202 2 0 0 0 0
196197 1 0 0 0 0
196198 1 0 0 0 0
196199 1 0 0 0 0
199200 1 0 0 0 0
199201 1 0 0 0 0
199223 1 0 0 0 0
203204 1 0 0 0 0
203205 1 0 0 0 0
206207 1 0 0 0 0
206208 1 0 0 0 0
208209 1 0 0 0 0
208210 1 0 0 0 0
208211 1 0 0 0 0
211212 1 0 0 0 0
211213 1 0 0 0 0
211214 1 0 0 0 0
214215 1 0 0 0 0
214216 1 0 0 0 0
214217 1 0 0 0 0
217218 1 0 0 0 0
217219 1 0 0 0 0
217220 1 0 0 0 0
220221 1 0 0 0 0
220222 1 0 0 0 0
220223 1 0 0 0 0
223224 1 0 0 0 0
224225 1 0 0 0 0
224226 1 0 0 0 0
224227 1 0 0 0 0
227228 1 0 0 0 0
227229 1 0 0 0 0
227230 1 0 0 0 0
230231 1 0 0 0 0
230235 2 0 0 0 0
231232 1 0 0 0 0
232233 1 0 0 0 0
232234 1 0 0 0 0
232236 1 0 0 0 0
236237 1 0 0 0 0
236238 1 0 0 0 0
236255 1 0 0 0 0
239240 1 0 0 0 0
239241 1 0 0 0 0
239242 1 0 0 0 0
239255 1 0 0 0 0
242243 1 0 0 0 0
242244 1 0 0 0 0
242245 1 0 0 0 0
245246 1 0 0 0 0
246247 1 0 0 0 0
246254 2 0 0 0 0
247248 1 0 0 0 0
247249 1 0 0 0 0
247250 1 0 0 0 0
250251 1 0 0 0 0
250252 1 0 0 0 0
250253 1 0 0 0 0
255256 1 0 0 0 0
255257 1 0 0 0 0

```

```

M END
> <NAME>
JJ32_1

```

```

$$$$
JJ36_1
MOE2012 3D

```

```

272271 0 0 1 0 0 0 0 0999 V2000
7.1660 -20.3910 16.8300 O 0 0 0 0 0 0 0 0 0 0 0 0 0 0 0
6.8360 -20.5110 17.7360 H 0 0 0 0 0 0 0 0 0 0 0 0 0 0 0
8.5330 -20.7820 16.8290 C 0 0 0 0 0 0 0 0 0 0 0 0 0 0 0
9.0740 -20.1540 17.5440 H 0 0 0 0 0 0 0 0 0 0 0 0 0 0 0
8.5960 -21.8250 17.1530 H 0 0 0 0 0 0 0 0 0 0 0 0 0 0 0

```











|     |     |   |   |   |   |   |
|-----|-----|---|---|---|---|---|
| 58  | 59  | 1 | 0 | 0 | 0 | 0 |
| 58  | 60  | 1 | 0 | 0 | 0 | 0 |
| 58  | 61  | 1 | 0 | 0 | 0 | 0 |
| 61  | 62  | 1 | 0 | 0 | 0 | 0 |
| 61  | 63  | 1 | 0 | 0 | 0 | 0 |
| 61  | 64  | 1 | 0 | 0 | 0 | 0 |
| 64  | 65  | 1 | 0 | 0 | 0 | 0 |
| 64  | 66  | 1 | 0 | 0 | 0 | 0 |
| 64  | 67  | 1 | 0 | 0 | 0 | 0 |
| 67  | 68  | 1 | 0 | 0 | 0 | 0 |
| 67  | 69  | 1 | 0 | 0 | 0 | 0 |
| 67  | 70  | 1 | 0 | 0 | 0 | 0 |
| 70  | 71  | 1 | 0 | 0 | 0 | 0 |
| 70  | 72  | 1 | 0 | 0 | 0 | 0 |
| 70  | 73  | 1 | 0 | 0 | 0 | 0 |
| 73  | 74  | 1 | 0 | 0 | 0 | 0 |
| 73  | 75  | 1 | 0 | 0 | 0 | 0 |
| 73  | 76  | 1 | 0 | 0 | 0 | 0 |
| 76  | 77  | 1 | 0 | 0 | 0 | 0 |
| 77  | 78  | 1 | 0 | 0 | 0 | 0 |
| 77  | 79  | 1 | 0 | 0 | 0 | 0 |
| 77  | 80  | 1 | 0 | 0 | 0 | 0 |
| 80  | 81  | 1 | 0 | 0 | 0 | 0 |
| 80  | 82  | 1 | 0 | 0 | 0 | 0 |
| 80  | 83  | 1 | 0 | 0 | 0 | 0 |
| 83  | 84  | 1 | 0 | 0 | 0 | 0 |
| 83  | 88  | 2 | 0 | 0 | 0 | 0 |
| 84  | 85  | 1 | 0 | 0 | 0 | 0 |
| 85  | 86  | 1 | 0 | 0 | 0 | 0 |
| 85  | 87  | 1 | 0 | 0 | 0 | 0 |
| 85  | 89  | 1 | 0 | 0 | 0 | 0 |
| 89  | 90  | 1 | 0 | 0 | 0 | 0 |
| 89  | 91  | 1 | 0 | 0 | 0 | 0 |
| 89  | 107 | 1 | 0 | 0 | 0 | 0 |
| 92  | 93  | 1 | 0 | 0 | 0 | 0 |
| 92  | 94  | 1 | 0 | 0 | 0 | 0 |
| 92  | 95  | 1 | 0 | 0 | 0 | 0 |
| 92  | 107 | 1 | 0 | 0 | 0 | 0 |
| 95  | 96  | 1 | 0 | 0 | 0 | 0 |
| 95  | 97  | 1 | 0 | 0 | 0 | 0 |
| 95  | 98  | 1 | 0 | 0 | 0 | 0 |
| 98  | 99  | 1 | 0 | 0 | 0 | 0 |
| 99  | 100 | 1 | 0 | 0 | 0 | 0 |
| 99  | 106 | 2 | 0 | 0 | 0 | 0 |
| 100 | 101 | 1 | 0 | 0 | 0 | 0 |
| 100 | 102 | 1 | 0 | 0 | 0 | 0 |
| 100 | 103 | 1 | 0 | 0 | 0 | 0 |
| 103 | 104 | 1 | 0 | 0 | 0 | 0 |
| 103 | 105 | 1 | 0 | 0 | 0 | 0 |
| 103 | 130 | 1 | 0 | 0 | 0 | 0 |
| 107 | 108 | 1 | 0 | 0 | 0 | 0 |
| 107 | 109 | 1 | 0 | 0 | 0 | 0 |
| 110 | 111 | 1 | 0 | 0 | 0 | 0 |
| 110 | 112 | 1 | 0 | 0 | 0 | 0 |
| 112 | 113 | 1 | 0 | 0 | 0 | 0 |
| 112 | 114 | 1 | 0 | 0 | 0 | 0 |
| 112 | 115 | 1 | 0 | 0 | 0 | 0 |
| 115 | 116 | 1 | 0 | 0 | 0 | 0 |
| 115 | 117 | 1 | 0 | 0 | 0 | 0 |
| 115 | 118 | 1 | 0 | 0 | 0 | 0 |
| 118 | 119 | 1 | 0 | 0 | 0 | 0 |
| 118 | 120 | 1 | 0 | 0 | 0 | 0 |
| 118 | 121 | 1 | 0 | 0 | 0 | 0 |
| 121 | 122 | 1 | 0 | 0 | 0 | 0 |
| 121 | 123 | 1 | 0 | 0 | 0 | 0 |
| 121 | 124 | 1 | 0 | 0 | 0 | 0 |
| 124 | 125 | 1 | 0 | 0 | 0 | 0 |
| 124 | 126 | 1 | 0 | 0 | 0 | 0 |
| 124 | 127 | 1 | 0 | 0 | 0 | 0 |
| 127 | 128 | 1 | 0 | 0 | 0 | 0 |
| 127 | 129 | 1 | 0 | 0 | 0 | 0 |
| 127 | 130 | 1 | 0 | 0 | 0 | 0 |
| 130 | 131 | 1 | 0 | 0 | 0 | 0 |
| 131 | 132 | 1 | 0 | 0 | 0 | 0 |
| 131 | 133 | 1 | 0 | 0 | 0 | 0 |
| 131 | 134 | 1 | 0 | 0 | 0 | 0 |
| 134 | 135 | 1 | 0 | 0 | 0 | 0 |
| 134 | 136 | 1 | 0 | 0 | 0 | 0 |
| 134 | 137 | 1 | 0 | 0 | 0 | 0 |
| 137 | 138 | 1 | 0 | 0 | 0 | 0 |
| 137 | 142 | 2 | 0 | 0 | 0 | 0 |

|        |   |   |   |   |   |
|--------|---|---|---|---|---|
| 138139 | 1 | 0 | 0 | 0 | 0 |
| 139140 | 1 | 0 | 0 | 0 | 0 |
| 139141 | 1 | 0 | 0 | 0 | 0 |
| 139143 | 1 | 0 | 0 | 0 | 0 |
| 143144 | 1 | 0 | 0 | 0 | 0 |
| 143145 | 1 | 0 | 0 | 0 | 0 |
| 143161 | 1 | 0 | 0 | 0 | 0 |
| 146147 | 1 | 0 | 0 | 0 | 0 |
| 146148 | 1 | 0 | 0 | 0 | 0 |
| 146149 | 1 | 0 | 0 | 0 | 0 |
| 146161 | 1 | 0 | 0 | 0 | 0 |
| 149150 | 1 | 0 | 0 | 0 | 0 |
| 149151 | 1 | 0 | 0 | 0 | 0 |
| 149152 | 1 | 0 | 0 | 0 | 0 |
| 152153 | 1 | 0 | 0 | 0 | 0 |
| 153154 | 1 | 0 | 0 | 0 | 0 |
| 153160 | 2 | 0 | 0 | 0 | 0 |
| 154155 | 1 | 0 | 0 | 0 | 0 |
| 154156 | 1 | 0 | 0 | 0 | 0 |
| 154157 | 1 | 0 | 0 | 0 | 0 |
| 157158 | 1 | 0 | 0 | 0 | 0 |
| 157159 | 1 | 0 | 0 | 0 | 0 |
| 157184 | 1 | 0 | 0 | 0 | 0 |
| 161162 | 1 | 0 | 0 | 0 | 0 |
| 161163 | 1 | 0 | 0 | 0 | 0 |
| 164165 | 1 | 0 | 0 | 0 | 0 |
| 164166 | 1 | 0 | 0 | 0 | 0 |
| 166167 | 1 | 0 | 0 | 0 | 0 |
| 166168 | 1 | 0 | 0 | 0 | 0 |
| 166169 | 1 | 0 | 0 | 0 | 0 |
| 169170 | 1 | 0 | 0 | 0 | 0 |
| 169171 | 1 | 0 | 0 | 0 | 0 |
| 169172 | 1 | 0 | 0 | 0 | 0 |
| 172173 | 1 | 0 | 0 | 0 | 0 |
| 172174 | 1 | 0 | 0 | 0 | 0 |
| 172175 | 1 | 0 | 0 | 0 | 0 |
| 175176 | 1 | 0 | 0 | 0 | 0 |
| 175177 | 1 | 0 | 0 | 0 | 0 |
| 175178 | 1 | 0 | 0 | 0 | 0 |
| 178179 | 1 | 0 | 0 | 0 | 0 |
| 178180 | 1 | 0 | 0 | 0 | 0 |
| 178181 | 1 | 0 | 0 | 0 | 0 |
| 181182 | 1 | 0 | 0 | 0 | 0 |
| 181183 | 1 | 0 | 0 | 0 | 0 |
| 181184 | 1 | 0 | 0 | 0 | 0 |
| 184185 | 1 | 0 | 0 | 0 | 0 |
| 185186 | 1 | 0 | 0 | 0 | 0 |
| 185187 | 1 | 0 | 0 | 0 | 0 |
| 185188 | 1 | 0 | 0 | 0 | 0 |
| 188189 | 1 | 0 | 0 | 0 | 0 |
| 188190 | 1 | 0 | 0 | 0 | 0 |
| 188191 | 1 | 0 | 0 | 0 | 0 |
| 191192 | 1 | 0 | 0 | 0 | 0 |
| 191196 | 2 | 0 | 0 | 0 | 0 |
| 192193 | 1 | 0 | 0 | 0 | 0 |
| 193194 | 1 | 0 | 0 | 0 | 0 |
| 193195 | 1 | 0 | 0 | 0 | 0 |
| 193197 | 1 | 0 | 0 | 0 | 0 |
| 197198 | 1 | 0 | 0 | 0 | 0 |
| 197199 | 1 | 0 | 0 | 0 | 0 |
| 197215 | 1 | 0 | 0 | 0 | 0 |
| 200201 | 1 | 0 | 0 | 0 | 0 |
| 200202 | 1 | 0 | 0 | 0 | 0 |
| 200203 | 1 | 0 | 0 | 0 | 0 |
| 200215 | 1 | 0 | 0 | 0 | 0 |
| 203204 | 1 | 0 | 0 | 0 | 0 |
| 203205 | 1 | 0 | 0 | 0 | 0 |
| 203206 | 1 | 0 | 0 | 0 | 0 |
| 206207 | 1 | 0 | 0 | 0 | 0 |
| 207208 | 1 | 0 | 0 | 0 | 0 |
| 207214 | 2 | 0 | 0 | 0 | 0 |
| 208209 | 1 | 0 | 0 | 0 | 0 |
| 208210 | 1 | 0 | 0 | 0 | 0 |
| 208211 | 1 | 0 | 0 | 0 | 0 |
| 211212 | 1 | 0 | 0 | 0 | 0 |
| 211213 | 1 | 0 | 0 | 0 | 0 |
| 211238 | 1 | 0 | 0 | 0 | 0 |
| 215216 | 1 | 0 | 0 | 0 | 0 |
| 215217 | 1 | 0 | 0 | 0 | 0 |
| 218219 | 1 | 0 | 0 | 0 | 0 |
| 218220 | 1 | 0 | 0 | 0 | 0 |

```

220221 1 0 0 0 0
220222 1 0 0 0 0
220223 1 0 0 0 0
223224 1 0 0 0 0
223225 1 0 0 0 0
223226 1 0 0 0 0
226227 1 0 0 0 0
226228 1 0 0 0 0
226229 1 0 0 0 0
229230 1 0 0 0 0
229231 1 0 0 0 0
229232 1 0 0 0 0
232233 1 0 0 0 0
232234 1 0 0 0 0
232235 1 0 0 0 0
235236 1 0 0 0 0
235237 1 0 0 0 0
235238 1 0 0 0 0
238239 1 0 0 0 0
239240 1 0 0 0 0
239241 1 0 0 0 0
239242 1 0 0 0 0
242243 1 0 0 0 0
242244 1 0 0 0 0
242245 1 0 0 0 0
245246 1 0 0 0 0
245250 2 0 0 0 0
246247 1 0 0 0 0
247248 1 0 0 0 0
247249 1 0 0 0 0
247251 1 0 0 0 0
251252 1 0 0 0 0
251253 1 0 0 0 0
251270 1 0 0 0 0
254255 1 0 0 0 0
254256 1 0 0 0 0
254257 1 0 0 0 0
254270 1 0 0 0 0
257258 1 0 0 0 0
257259 1 0 0 0 0
257260 1 0 0 0 0
260261 1 0 0 0 0
261262 1 0 0 0 0
261269 2 0 0 0 0
262263 1 0 0 0 0
262264 1 0 0 0 0
262265 1 0 0 0 0
265266 1 0 0 0 0
265267 1 0 0 0 0
265268 1 0 0 0 0
270271 1 0 0 0 0
270272 1 0 0 0 0

```

```

M END
> <NAME>
JJ36_1

```

```

$$$$
JJ80_1
MOE2012 3D

```

```

262261 0 0 1 0 0 0 0 0999 V2000
49.9930 -2.7850 -20.4570 C 0 0 0 0 0 0 0 0 0 0 0 0 0 0 0
50.8510 -3.1860 -21.0090 H 0 0 0 0 0 0 0 0 0 0 0 0 0 0 0
49.7190 -1.8200 -20.8980 H 0 0 0 0 0 0 0 0 0 0 0 0 0 0 0
49.1670 -3.4870 -20.6170 H 0 0 0 0 0 0 0 0 0 0 0 0 0 0 0
50.3050 -2.6720 -19.0290 N 0 0 0 0 0 0 0 0 0 0 0 0 0 0 0
49.1230 -2.1930 -18.2920 C 0 0 0 0 0 0 0 0 0 0 0 0 0 0 0
48.8760 -1.1620 -18.5800 H 0 0 0 0 0 0 0 0 0 0 0 0 0 0 0
48.2620 -2.8150 -18.5680 H 0 0 0 0 0 0 0 0 0 0 0 0 0 0 0
49.2870 -2.2860 -16.7680 C 0 0 0 0 0 0 0 0 0 0 0 0 0 0 0
49.5900 -3.3050 -16.4940 H 0 0 0 0 0 0 0 0 0 0 0 0 0 0 0
50.0760 -1.6060 -16.4270 H 0 0 0 0 0 0 0 0 0 0 0 0 0 0 0
47.9780 -1.9270 -16.0570 C 0 0 0 0 0 0 0 0 0 0 0 0 0 0 0
47.6820 -0.9140 -16.3490 H 0 0 0 0 0 0 0 0 0 0 0 0 0 0 0
47.1890 -2.6190 -16.3740 H 0 0 0 0 0 0 0 0 0 0 0 0 0 0 0
51.4640 -1.7940 -18.8470 C 0 0 0 0 0 0 0 0 0 0 0 0 0 0 0
51.2520 -0.7620 -19.1490 H 0 0 0 0 0 0 0 0 0 0 0 0 0 0 0
52.3150 -2.1550 -19.4370 H 0 0 0 0 0 0 0 0 0 0 0 0 0 0 0
51.8020 -1.7920 -17.8070 H 0 0 0 0 0 0 0 0 0 0 0 0 0 0 0
48.1680 -2.0060 -14.6070 N 0 0 3 0 0 0 0 0 0 0 0 0 0 0 0
48.5340 -2.9300 -14.3720 H 0 0 0 0 0 0 0 0 0 0 0 0 0 0 0

```









|    |    |   |   |   |   |   |
|----|----|---|---|---|---|---|
| 1  | 3  | 1 | 0 | 0 | 0 | 0 |
| 1  | 4  | 1 | 0 | 0 | 0 | 0 |
| 1  | 5  | 1 | 0 | 0 | 0 | 0 |
| 5  | 6  | 1 | 0 | 0 | 0 | 0 |
| 5  | 15 | 1 | 0 | 0 | 0 | 0 |
| 6  | 7  | 1 | 0 | 0 | 0 | 0 |
| 6  | 8  | 1 | 0 | 0 | 0 | 0 |
| 6  | 9  | 1 | 0 | 0 | 0 | 0 |
| 9  | 10 | 1 | 0 | 0 | 0 | 0 |
| 9  | 11 | 1 | 0 | 0 | 0 | 0 |
| 9  | 12 | 1 | 0 | 0 | 0 | 0 |
| 12 | 13 | 1 | 0 | 0 | 0 | 0 |
| 12 | 14 | 1 | 0 | 0 | 0 | 0 |
| 12 | 19 | 1 | 0 | 0 | 0 | 0 |
| 15 | 16 | 1 | 0 | 0 | 0 | 0 |
| 15 | 17 | 1 | 0 | 0 | 0 | 0 |
| 15 | 18 | 1 | 0 | 0 | 0 | 0 |
| 19 | 20 | 1 | 0 | 0 | 0 | 0 |
| 19 | 21 | 1 | 0 | 0 | 0 | 0 |
| 21 | 22 | 1 | 0 | 0 | 0 | 0 |
| 21 | 23 | 1 | 0 | 0 | 0 | 0 |
| 21 | 24 | 1 | 0 | 0 | 0 | 0 |
| 24 | 25 | 1 | 0 | 0 | 0 | 0 |
| 24 | 26 | 1 | 0 | 0 | 0 | 0 |
| 24 | 27 | 1 | 0 | 0 | 0 | 0 |
| 27 | 28 | 1 | 0 | 0 | 0 | 0 |
| 27 | 32 | 2 | 0 | 0 | 0 | 0 |
| 28 | 29 | 1 | 0 | 0 | 0 | 0 |
| 29 | 30 | 1 | 0 | 0 | 0 | 0 |
| 29 | 31 | 1 | 0 | 0 | 0 | 0 |
| 29 | 33 | 1 | 0 | 0 | 0 | 0 |
| 33 | 34 | 1 | 0 | 0 | 0 | 0 |
| 33 | 35 | 1 | 0 | 0 | 0 | 0 |
| 33 | 51 | 1 | 0 | 0 | 0 | 0 |
| 36 | 37 | 1 | 0 | 0 | 0 | 0 |
| 36 | 38 | 1 | 0 | 0 | 0 | 0 |
| 36 | 39 | 1 | 0 | 0 | 0 | 0 |
| 36 | 51 | 1 | 0 | 0 | 0 | 0 |
| 39 | 40 | 1 | 0 | 0 | 0 | 0 |
| 39 | 41 | 1 | 0 | 0 | 0 | 0 |
| 39 | 42 | 1 | 0 | 0 | 0 | 0 |
| 42 | 43 | 1 | 0 | 0 | 0 | 0 |
| 43 | 44 | 1 | 0 | 0 | 0 | 0 |
| 43 | 50 | 2 | 0 | 0 | 0 | 0 |
| 44 | 45 | 1 | 0 | 0 | 0 | 0 |
| 44 | 46 | 1 | 0 | 0 | 0 | 0 |
| 44 | 47 | 1 | 0 | 0 | 0 | 0 |
| 47 | 48 | 1 | 0 | 0 | 0 | 0 |
| 47 | 49 | 1 | 0 | 0 | 0 | 0 |
| 47 | 72 | 1 | 0 | 0 | 0 | 0 |
| 51 | 52 | 1 | 0 | 0 | 0 | 0 |
| 51 | 53 | 1 | 0 | 0 | 0 | 0 |
| 54 | 55 | 1 | 0 | 0 | 0 | 0 |
| 54 | 56 | 1 | 0 | 0 | 0 | 0 |
| 54 | 57 | 1 | 0 | 0 | 0 | 0 |
| 54 | 58 | 1 | 0 | 0 | 0 | 0 |
| 58 | 59 | 1 | 0 | 0 | 0 | 0 |
| 58 | 68 | 1 | 0 | 0 | 0 | 0 |
| 59 | 60 | 1 | 0 | 0 | 0 | 0 |
| 59 | 61 | 1 | 0 | 0 | 0 | 0 |
| 59 | 62 | 1 | 0 | 0 | 0 | 0 |
| 62 | 63 | 1 | 0 | 0 | 0 | 0 |
| 62 | 64 | 1 | 0 | 0 | 0 | 0 |
| 62 | 65 | 1 | 0 | 0 | 0 | 0 |
| 65 | 66 | 1 | 0 | 0 | 0 | 0 |
| 65 | 67 | 1 | 0 | 0 | 0 | 0 |
| 65 | 72 | 1 | 0 | 0 | 0 | 0 |
| 68 | 69 | 1 | 0 | 0 | 0 | 0 |
| 68 | 70 | 1 | 0 | 0 | 0 | 0 |
| 68 | 71 | 1 | 0 | 0 | 0 | 0 |
| 72 | 73 | 1 | 0 | 0 | 0 | 0 |
| 73 | 74 | 1 | 0 | 0 | 0 | 0 |
| 73 | 75 | 1 | 0 | 0 | 0 | 0 |
| 73 | 76 | 1 | 0 | 0 | 0 | 0 |
| 76 | 77 | 1 | 0 | 0 | 0 | 0 |
| 76 | 78 | 1 | 0 | 0 | 0 | 0 |
| 76 | 79 | 1 | 0 | 0 | 0 | 0 |
| 79 | 80 | 1 | 0 | 0 | 0 | 0 |
| 79 | 84 | 2 | 0 | 0 | 0 | 0 |
| 80 | 81 | 1 | 0 | 0 | 0 | 0 |
| 81 | 82 | 1 | 0 | 0 | 0 | 0 |

|     |     |   |   |   |   |   |
|-----|-----|---|---|---|---|---|
| 81  | 83  | 1 | 0 | 0 | 0 | 0 |
| 81  | 85  | 1 | 0 | 0 | 0 | 0 |
| 85  | 86  | 1 | 0 | 0 | 0 | 0 |
| 85  | 87  | 1 | 0 | 0 | 0 | 0 |
| 85  | 103 | 1 | 0 | 0 | 0 | 0 |
| 88  | 89  | 1 | 0 | 0 | 0 | 0 |
| 88  | 90  | 1 | 0 | 0 | 0 | 0 |
| 88  | 91  | 1 | 0 | 0 | 0 | 0 |
| 88  | 103 | 1 | 0 | 0 | 0 | 0 |
| 91  | 92  | 1 | 0 | 0 | 0 | 0 |
| 91  | 93  | 1 | 0 | 0 | 0 | 0 |
| 91  | 94  | 1 | 0 | 0 | 0 | 0 |
| 94  | 95  | 1 | 0 | 0 | 0 | 0 |
| 95  | 96  | 1 | 0 | 0 | 0 | 0 |
| 95  | 102 | 2 | 0 | 0 | 0 | 0 |
| 96  | 97  | 1 | 0 | 0 | 0 | 0 |
| 96  | 98  | 1 | 0 | 0 | 0 | 0 |
| 96  | 99  | 1 | 0 | 0 | 0 | 0 |
| 99  | 100 | 1 | 0 | 0 | 0 | 0 |
| 99  | 101 | 1 | 0 | 0 | 0 | 0 |
| 99  | 124 | 1 | 0 | 0 | 0 | 0 |
| 103 | 104 | 1 | 0 | 0 | 0 | 0 |
| 103 | 105 | 1 | 0 | 0 | 0 | 0 |
| 106 | 107 | 1 | 0 | 0 | 0 | 0 |
| 106 | 108 | 1 | 0 | 0 | 0 | 0 |
| 106 | 109 | 1 | 0 | 0 | 0 | 0 |
| 106 | 110 | 1 | 0 | 0 | 0 | 0 |
| 110 | 111 | 1 | 0 | 0 | 0 | 0 |
| 110 | 120 | 1 | 0 | 0 | 0 | 0 |
| 111 | 112 | 1 | 0 | 0 | 0 | 0 |
| 111 | 113 | 1 | 0 | 0 | 0 | 0 |
| 111 | 114 | 1 | 0 | 0 | 0 | 0 |
| 114 | 115 | 1 | 0 | 0 | 0 | 0 |
| 114 | 116 | 1 | 0 | 0 | 0 | 0 |
| 114 | 117 | 1 | 0 | 0 | 0 | 0 |
| 117 | 118 | 1 | 0 | 0 | 0 | 0 |
| 117 | 119 | 1 | 0 | 0 | 0 | 0 |
| 117 | 124 | 1 | 0 | 0 | 0 | 0 |
| 120 | 121 | 1 | 0 | 0 | 0 | 0 |
| 120 | 122 | 1 | 0 | 0 | 0 | 0 |
| 120 | 123 | 1 | 0 | 0 | 0 | 0 |
| 124 | 125 | 1 | 0 | 0 | 0 | 0 |
| 125 | 126 | 1 | 0 | 0 | 0 | 0 |
| 125 | 127 | 1 | 0 | 0 | 0 | 0 |
| 125 | 128 | 1 | 0 | 0 | 0 | 0 |
| 128 | 129 | 1 | 0 | 0 | 0 | 0 |
| 128 | 130 | 1 | 0 | 0 | 0 | 0 |
| 128 | 131 | 1 | 0 | 0 | 0 | 0 |
| 131 | 132 | 1 | 0 | 0 | 0 | 0 |
| 131 | 136 | 2 | 0 | 0 | 0 | 0 |
| 132 | 133 | 1 | 0 | 0 | 0 | 0 |
| 133 | 134 | 1 | 0 | 0 | 0 | 0 |
| 133 | 135 | 1 | 0 | 0 | 0 | 0 |
| 133 | 137 | 1 | 0 | 0 | 0 | 0 |
| 137 | 138 | 1 | 0 | 0 | 0 | 0 |
| 137 | 139 | 1 | 0 | 0 | 0 | 0 |
| 137 | 155 | 1 | 0 | 0 | 0 | 0 |
| 140 | 141 | 1 | 0 | 0 | 0 | 0 |
| 140 | 142 | 1 | 0 | 0 | 0 | 0 |
| 140 | 143 | 1 | 0 | 0 | 0 | 0 |
| 140 | 155 | 1 | 0 | 0 | 0 | 0 |
| 143 | 144 | 1 | 0 | 0 | 0 | 0 |
| 143 | 145 | 1 | 0 | 0 | 0 | 0 |
| 143 | 146 | 1 | 0 | 0 | 0 | 0 |
| 146 | 147 | 1 | 0 | 0 | 0 | 0 |
| 147 | 148 | 1 | 0 | 0 | 0 | 0 |
| 147 | 154 | 2 | 0 | 0 | 0 | 0 |
| 148 | 149 | 1 | 0 | 0 | 0 | 0 |
| 148 | 150 | 1 | 0 | 0 | 0 | 0 |
| 148 | 151 | 1 | 0 | 0 | 0 | 0 |
| 151 | 152 | 1 | 0 | 0 | 0 | 0 |
| 151 | 153 | 1 | 0 | 0 | 0 | 0 |
| 151 | 176 | 1 | 0 | 0 | 0 | 0 |
| 155 | 156 | 1 | 0 | 0 | 0 | 0 |
| 155 | 157 | 1 | 0 | 0 | 0 | 0 |
| 158 | 159 | 1 | 0 | 0 | 0 | 0 |
| 158 | 160 | 1 | 0 | 0 | 0 | 0 |
| 158 | 161 | 1 | 0 | 0 | 0 | 0 |
| 158 | 162 | 1 | 0 | 0 | 0 | 0 |
| 162 | 163 | 1 | 0 | 0 | 0 | 0 |
| 162 | 172 | 1 | 0 | 0 | 0 | 0 |

|        |   |   |   |   |   |
|--------|---|---|---|---|---|
| 163164 | 1 | 0 | 0 | 0 | 0 |
| 163165 | 1 | 0 | 0 | 0 | 0 |
| 163166 | 1 | 0 | 0 | 0 | 0 |
| 166167 | 1 | 0 | 0 | 0 | 0 |
| 166168 | 1 | 0 | 0 | 0 | 0 |
| 166169 | 1 | 0 | 0 | 0 | 0 |
| 169170 | 1 | 0 | 0 | 0 | 0 |
| 169171 | 1 | 0 | 0 | 0 | 0 |
| 169176 | 1 | 0 | 0 | 0 | 0 |
| 172173 | 1 | 0 | 0 | 0 | 0 |
| 172174 | 1 | 0 | 0 | 0 | 0 |
| 172175 | 1 | 0 | 0 | 0 | 0 |
| 176177 | 1 | 0 | 0 | 0 | 0 |
| 177178 | 1 | 0 | 0 | 0 | 0 |
| 177179 | 1 | 0 | 0 | 0 | 0 |
| 177180 | 1 | 0 | 0 | 0 | 0 |
| 180181 | 1 | 0 | 0 | 0 | 0 |
| 180182 | 1 | 0 | 0 | 0 | 0 |
| 180183 | 1 | 0 | 0 | 0 | 0 |
| 183184 | 1 | 0 | 0 | 0 | 0 |
| 183188 | 2 | 0 | 0 | 0 | 0 |
| 184185 | 1 | 0 | 0 | 0 | 0 |
| 185186 | 1 | 0 | 0 | 0 | 0 |
| 185187 | 1 | 0 | 0 | 0 | 0 |
| 185189 | 1 | 0 | 0 | 0 | 0 |
| 189190 | 1 | 0 | 0 | 0 | 0 |
| 189191 | 1 | 0 | 0 | 0 | 0 |
| 189207 | 1 | 0 | 0 | 0 | 0 |
| 192193 | 1 | 0 | 0 | 0 | 0 |
| 192194 | 1 | 0 | 0 | 0 | 0 |
| 192195 | 1 | 0 | 0 | 0 | 0 |
| 192207 | 1 | 0 | 0 | 0 | 0 |
| 195196 | 1 | 0 | 0 | 0 | 0 |
| 195197 | 1 | 0 | 0 | 0 | 0 |
| 195198 | 1 | 0 | 0 | 0 | 0 |
| 198199 | 1 | 0 | 0 | 0 | 0 |
| 199200 | 1 | 0 | 0 | 0 | 0 |
| 199206 | 2 | 0 | 0 | 0 | 0 |
| 200201 | 1 | 0 | 0 | 0 | 0 |
| 200202 | 1 | 0 | 0 | 0 | 0 |
| 200203 | 1 | 0 | 0 | 0 | 0 |
| 203204 | 1 | 0 | 0 | 0 | 0 |
| 203205 | 1 | 0 | 0 | 0 | 0 |
| 203228 | 1 | 0 | 0 | 0 | 0 |
| 207208 | 1 | 0 | 0 | 0 | 0 |
| 207209 | 1 | 0 | 0 | 0 | 0 |
| 210211 | 1 | 0 | 0 | 0 | 0 |
| 210212 | 1 | 0 | 0 | 0 | 0 |
| 210213 | 1 | 0 | 0 | 0 | 0 |
| 210214 | 1 | 0 | 0 | 0 | 0 |
| 214215 | 1 | 0 | 0 | 0 | 0 |
| 214224 | 1 | 0 | 0 | 0 | 0 |
| 215216 | 1 | 0 | 0 | 0 | 0 |
| 215217 | 1 | 0 | 0 | 0 | 0 |
| 215218 | 1 | 0 | 0 | 0 | 0 |
| 218219 | 1 | 0 | 0 | 0 | 0 |
| 218220 | 1 | 0 | 0 | 0 | 0 |
| 218221 | 1 | 0 | 0 | 0 | 0 |
| 221222 | 1 | 0 | 0 | 0 | 0 |
| 221223 | 1 | 0 | 0 | 0 | 0 |
| 221228 | 1 | 0 | 0 | 0 | 0 |
| 224225 | 1 | 0 | 0 | 0 | 0 |
| 224226 | 1 | 0 | 0 | 0 | 0 |
| 224227 | 1 | 0 | 0 | 0 | 0 |
| 228229 | 1 | 0 | 0 | 0 | 0 |
| 229230 | 1 | 0 | 0 | 0 | 0 |
| 229231 | 1 | 0 | 0 | 0 | 0 |
| 229232 | 1 | 0 | 0 | 0 | 0 |
| 232233 | 1 | 0 | 0 | 0 | 0 |
| 232234 | 1 | 0 | 0 | 0 | 0 |
| 232235 | 1 | 0 | 0 | 0 | 0 |
| 235236 | 1 | 0 | 0 | 0 | 0 |
| 235240 | 2 | 0 | 0 | 0 | 0 |
| 236237 | 1 | 0 | 0 | 0 | 0 |
| 237238 | 1 | 0 | 0 | 0 | 0 |
| 237239 | 1 | 0 | 0 | 0 | 0 |
| 237241 | 1 | 0 | 0 | 0 | 0 |
| 241242 | 1 | 0 | 0 | 0 | 0 |
| 241243 | 1 | 0 | 0 | 0 | 0 |
| 241260 | 1 | 0 | 0 | 0 | 0 |
| 244245 | 1 | 0 | 0 | 0 | 0 |

244246 1 0 0 0 0  
244247 1 0 0 0 0  
244260 1 0 0 0 0  
247248 1 0 0 0 0  
247249 1 0 0 0 0  
247250 1 0 0 0 0  
250251 1 0 0 0 0  
251252 1 0 0 0 0  
251259 2 0 0 0 0  
252253 1 0 0 0 0  
252254 1 0 0 0 0  
252255 1 0 0 0 0  
255256 1 0 0 0 0  
255257 1 0 0 0 0  
255258 1 0 0 0 0  
260261 1 0 0 0 0  
260262 1 0 0 0 0

M END  
> <NAME>  
JJ80\_1

\$\$\$  
JJ86\_1  
MOE2012 3D

287286 0 0 1 0 0 0 0 0999 V2000  
10.5170 20.9300 -15.1090 C 0 0 0 0 0 0 0 0 0 0 0 0 0 0 0 0 0 0  
10.2990 20.7960 -14.0400 H 0 0 0 0 0 0 0 0 0 0 0 0 0 0 0 0 0 0  
11.4920 21.4340 -15.1470 H 0 0 0 0 0 0 0 0 0 0 0 0 0 0 0 0 0 0  
10.5730 19.6110 -15.7710 N 0 0 0 0 0 0 0 0 0 0 0 0 0 0 0 0 0 0  
11.4630 18.7090 -15.0090 C 0 0 0 0 0 0 0 0 0 0 0 0 0 0 0 0 0 0  
12.5120 19.0120 -15.1210 H 0 0 0 0 0 0 0 0 0 0 0 0 0 0 0 0 0 0  
11.2230 18.7900 -13.9400 H 0 0 0 0 0 0 0 0 0 0 0 0 0 0 0 0 0 0  
11.2840 17.2250 -15.3970 C 0 0 0 0 0 0 0 0 0 0 0 0 0 0 0 0 0 0  
10.2290 16.9460 -15.2800 H 0 0 0 0 0 0 0 0 0 0 0 0 0 0 0 0 0 0  
11.5570 17.0760 -16.4470 H 0 0 0 0 0 0 0 0 0 0 0 0 0 0 0 0 0 0  
12.1230 16.3660 -14.5500 N 0 0 3 0 0 0 0 0 0 0 0 0 0 0 0 0 0 0  
11.8560 16.4930 -13.5730 H 0 0 0 0 0 0 0 0 0 0 0 0 0 0 0 0 0 0  
10.9920 19.7270 -17.1820 C 0 0 0 0 0 0 0 0 0 0 0 0 0 0 0 0 0 0  
11.3620 20.7320 -17.4250 H 0 0 0 0 0 0 0 0 0 0 0 0 0 0 0 0 0 0  
11.8440 19.0770 -17.4200 H 0 0 0 0 0 0 0 0 0 0 0 0 0 0 0 0 0 0  
9.4310 21.8610 -15.6620 C 0 0 0 0 0 0 0 0 0 0 0 0 0 0 0 0 0 0  
9.6270 22.1390 -16.7010 H 0 0 0 0 0 0 0 0 0 0 0 0 0 0 0 0 0 0  
8.4460 21.3860 -15.5990 H 0 0 0 0 0 0 0 0 0 0 0 0 0 0 0 0 0 0  
9.4000 23.0560 -14.8870 O 0 0 0 0 0 0 0 0 0 0 0 0 0 0 0 0 0 0  
8.6960 23.6170 -15.2560 H 0 0 0 0 0 0 0 0 0 0 0 0 0 0 0 0 0 0  
9.8370 19.3640 -18.1190 C 0 0 0 0 0 0 0 0 0 0 0 0 0 0 0 0 0 0  
9.5360 18.3200 -17.9810 H 0 0 0 0 0 0 0 0 0 0 0 0 0 0 0 0 0 0  
8.9690 20.0080 -17.9450 H 0 0 0 0 0 0 0 0 0 0 0 0 0 0 0 0 0 0  
10.2530 19.5370 -19.4700 O 0 0 0 0 0 0 0 0 0 0 0 0 0 0 0 0 0 0  
9.4890 19.3230 -20.0340 H 0 0 0 0 0 0 0 0 0 0 0 0 0 0 0 0 0 0  
11.9720 14.9560 -14.9220 C 0 0 0 0 0 0 0 0 0 0 0 0 0 0 0 0 0 0  
10.9350 14.6430 -14.7490 H 0 0 0 0 0 0 0 0 0 0 0 0 0 0 0 0 0 0  
12.1880 14.8180 -15.9880 H 0 0 0 0 0 0 0 0 0 0 0 0 0 0 0 0 0 0  
12.8930 14.0740 -14.0850 C 0 0 0 0 0 0 0 0 0 0 0 0 0 0 0 0 0 0  
12.7740 14.3060 -13.0200 H 0 0 0 0 0 0 0 0 0 0 0 0 0 0 0 0 0 0  
12.6310 13.0180 -14.2210 H 0 0 0 0 0 0 0 0 0 0 0 0 0 0 0 0 0 0  
14.3390 14.2290 -14.4910 C 0 0 0 0 0 0 0 0 0 0 0 0 0 0 0 0 0 0  
15.1360 14.1920 -13.3850 O 0 0 0 0 0 0 0 0 0 0 0 0 0 0 0 0 0 0  
16.5410 14.3120 -13.6500 C 0 0 0 0 0 0 0 0 0 0 0 0 0 0 0 0 0 0  
16.8690 13.4650 -14.2640 H 0 0 0 0 0 0 0 0 0 0 0 0 0 0 0 0 0 0  
16.7340 15.2500 -14.1840 H 0 0 0 0 0 0 0 0 0 0 0 0 0 0 0 0 0 0  
14.7320 14.3250 -15.6460 O 0 0 0 0 0 0 0 0 0 0 0 0 0 0 0 0 0 0  
17.2730 14.3090 -12.3120 C 0 0 0 0 0 0 0 0 0 0 0 0 0 0 0 0 0 0  
16.8900 15.1280 -11.6900 H 0 0 0 0 0 0 0 0 0 0 0 0 0 0 0 0 0 0  
17.0330 13.3850 -11.7710 H 0 0 0 0 0 0 0 0 0 0 0 0 0 0 0 0 0 0  
19.4990 14.4450 -11.1360 C 0 0 0 0 0 0 0 0 0 0 0 0 0 0 0 0 0 0  
19.2740 13.5230 -10.5860 H 0 0 0 0 0 0 0 0 0 0 0 0 0 0 0 0 0 0  
19.1240 15.2650 -10.5110 H 0 0 0 0 0 0 0 0 0 0 0 0 0 0 0 0 0 0  
21.0100 14.5830 -11.2910 C 0 0 0 0 0 0 0 0 0 0 0 0 0 0 0 0 0 0  
21.4110 13.7390 -11.8640 H 0 0 0 0 0 0 0 0 0 0 0 0 0 0 0 0 0 0  
21.2540 15.5230 -11.7990 H 0 0 0 0 0 0 0 0 0 0 0 0 0 0 0 0 0 0  
21.5900 14.5850 -9.9780 O 0 0 0 0 0 0 0 0 0 0 0 0 0 0 0 0 0 0  
22.9480 14.7220 -9.9500 C 0 0 0 0 0 0 0 0 0 0 0 0 0 0 0 0 0 0  
23.4160 14.7140 -8.5170 C 0 0 0 0 0 0 0 0 0 0 0 0 0 0 0 0 0 0  
22.9380 15.5580 -8.0100 H 0 0 0 0 0 0 0 0 0 0 0 0 0 0 0 0 0 0  
23.0830 13.7770 -8.0560 H 0 0 0 0 0 0 0 0 0 0 0 0 0 0 0 0 0 0  
24.9410 14.8200 -8.4340 C 0 0 0 0 0 0 0 0 0 0 0 0 0 0 0 0 0 0  
25.3580 14.0110 -9.0500 H 0 0 0 0 0 0 0 0 0 0 0 0 0 0 0 0 0 0  
25.2830 15.7610 -8.8840 H 0 0 0 0 0 0 0 0 0 0 0 0 0 0 0 0 0 0  
23.6680 14.8400 -10.9310 O 0 0 0 0 0 0 0 0 0 0 0 0 0 0 0 0 0 0







|    |    |   |   |   |   |   |
|----|----|---|---|---|---|---|
| 8  | 11 | 1 | 0 | 0 | 0 | 0 |
| 11 | 12 | 1 | 0 | 0 | 0 | 0 |
| 11 | 26 | 1 | 0 | 0 | 0 | 0 |
| 13 | 14 | 1 | 0 | 0 | 0 | 0 |
| 13 | 15 | 1 | 0 | 0 | 0 | 0 |
| 13 | 21 | 1 | 0 | 0 | 0 | 0 |
| 16 | 17 | 1 | 0 | 0 | 0 | 0 |
| 16 | 18 | 1 | 0 | 0 | 0 | 0 |
| 16 | 19 | 1 | 0 | 0 | 0 | 0 |
| 19 | 20 | 1 | 0 | 0 | 0 | 0 |
| 21 | 22 | 1 | 0 | 0 | 0 | 0 |
| 21 | 23 | 1 | 0 | 0 | 0 | 0 |
| 21 | 24 | 1 | 0 | 0 | 0 | 0 |
| 24 | 25 | 1 | 0 | 0 | 0 | 0 |
| 26 | 27 | 1 | 0 | 0 | 0 | 0 |
| 26 | 28 | 1 | 0 | 0 | 0 | 0 |
| 26 | 29 | 1 | 0 | 0 | 0 | 0 |
| 29 | 30 | 1 | 0 | 0 | 0 | 0 |
| 29 | 31 | 1 | 0 | 0 | 0 | 0 |
| 29 | 32 | 1 | 0 | 0 | 0 | 0 |
| 32 | 33 | 1 | 0 | 0 | 0 | 0 |
| 32 | 37 | 2 | 0 | 0 | 0 | 0 |
| 33 | 34 | 1 | 0 | 0 | 0 | 0 |
| 34 | 35 | 1 | 0 | 0 | 0 | 0 |
| 34 | 36 | 1 | 0 | 0 | 0 | 0 |
| 34 | 38 | 1 | 0 | 0 | 0 | 0 |
| 38 | 39 | 1 | 0 | 0 | 0 | 0 |
| 38 | 40 | 1 | 0 | 0 | 0 | 0 |
| 38 | 56 | 1 | 0 | 0 | 0 | 0 |
| 41 | 42 | 1 | 0 | 0 | 0 | 0 |
| 41 | 43 | 1 | 0 | 0 | 0 | 0 |
| 41 | 44 | 1 | 0 | 0 | 0 | 0 |
| 41 | 56 | 1 | 0 | 0 | 0 | 0 |
| 44 | 45 | 1 | 0 | 0 | 0 | 0 |
| 44 | 46 | 1 | 0 | 0 | 0 | 0 |
| 44 | 47 | 1 | 0 | 0 | 0 | 0 |
| 47 | 48 | 1 | 0 | 0 | 0 | 0 |
| 48 | 49 | 1 | 0 | 0 | 0 | 0 |
| 48 | 55 | 2 | 0 | 0 | 0 | 0 |
| 49 | 50 | 1 | 0 | 0 | 0 | 0 |
| 49 | 51 | 1 | 0 | 0 | 0 | 0 |
| 49 | 52 | 1 | 0 | 0 | 0 | 0 |
| 52 | 53 | 1 | 0 | 0 | 0 | 0 |
| 52 | 54 | 1 | 0 | 0 | 0 | 0 |
| 52 | 69 | 1 | 0 | 0 | 0 | 0 |
| 56 | 57 | 1 | 0 | 0 | 0 | 0 |
| 56 | 58 | 1 | 0 | 0 | 0 | 0 |
| 59 | 60 | 1 | 0 | 0 | 0 | 0 |
| 59 | 61 | 1 | 0 | 0 | 0 | 0 |
| 59 | 62 | 1 | 0 | 0 | 0 | 0 |
| 59 | 73 | 1 | 0 | 0 | 0 | 0 |
| 62 | 63 | 1 | 0 | 0 | 0 | 0 |
| 62 | 70 | 1 | 0 | 0 | 0 | 0 |
| 63 | 64 | 1 | 0 | 0 | 0 | 0 |
| 63 | 65 | 1 | 0 | 0 | 0 | 0 |
| 63 | 66 | 1 | 0 | 0 | 0 | 0 |
| 66 | 67 | 1 | 0 | 0 | 0 | 0 |
| 66 | 68 | 1 | 0 | 0 | 0 | 0 |
| 66 | 69 | 1 | 0 | 0 | 0 | 0 |
| 69 | 83 | 1 | 0 | 0 | 0 | 0 |
| 70 | 71 | 1 | 0 | 0 | 0 | 0 |
| 70 | 72 | 1 | 0 | 0 | 0 | 0 |
| 70 | 78 | 1 | 0 | 0 | 0 | 0 |
| 73 | 74 | 1 | 0 | 0 | 0 | 0 |
| 73 | 75 | 1 | 0 | 0 | 0 | 0 |
| 73 | 76 | 1 | 0 | 0 | 0 | 0 |
| 76 | 77 | 1 | 0 | 0 | 0 | 0 |
| 78 | 79 | 1 | 0 | 0 | 0 | 0 |
| 78 | 80 | 1 | 0 | 0 | 0 | 0 |
| 78 | 81 | 1 | 0 | 0 | 0 | 0 |
| 81 | 82 | 1 | 0 | 0 | 0 | 0 |
| 83 | 84 | 1 | 0 | 0 | 0 | 0 |
| 83 | 85 | 1 | 0 | 0 | 0 | 0 |
| 83 | 86 | 1 | 0 | 0 | 0 | 0 |
| 86 | 87 | 1 | 0 | 0 | 0 | 0 |
| 86 | 88 | 1 | 0 | 0 | 0 | 0 |
| 86 | 89 | 1 | 0 | 0 | 0 | 0 |
| 89 | 90 | 1 | 0 | 0 | 0 | 0 |
| 89 | 94 | 2 | 0 | 0 | 0 | 0 |
| 90 | 91 | 1 | 0 | 0 | 0 | 0 |
| 91 | 92 | 1 | 0 | 0 | 0 | 0 |



|     |     |   |   |   |   |   |
|-----|-----|---|---|---|---|---|
| 91  | 93  | 1 | 0 | 0 | 0 | 0 |
| 91  | 95  | 1 | 0 | 0 | 0 | 0 |
| 95  | 96  | 1 | 0 | 0 | 0 | 0 |
| 95  | 97  | 1 | 0 | 0 | 0 | 0 |
| 95  | 113 | 1 | 0 | 0 | 0 | 0 |
| 98  | 99  | 1 | 0 | 0 | 0 | 0 |
| 98  | 100 | 1 | 0 | 0 | 0 | 0 |
| 98  | 101 | 1 | 0 | 0 | 0 | 0 |
| 98  | 113 | 1 | 0 | 0 | 0 | 0 |
| 101 | 102 | 1 | 0 | 0 | 0 | 0 |
| 101 | 103 | 1 | 0 | 0 | 0 | 0 |
| 101 | 104 | 1 | 0 | 0 | 0 | 0 |
| 104 | 105 | 1 | 0 | 0 | 0 | 0 |
| 105 | 106 | 1 | 0 | 0 | 0 | 0 |
| 105 | 112 | 2 | 0 | 0 | 0 | 0 |
| 106 | 107 | 1 | 0 | 0 | 0 | 0 |
| 106 | 108 | 1 | 0 | 0 | 0 | 0 |
| 106 | 109 | 1 | 0 | 0 | 0 | 0 |
| 109 | 110 | 1 | 0 | 0 | 0 | 0 |
| 109 | 111 | 1 | 0 | 0 | 0 | 0 |
| 109 | 126 | 1 | 0 | 0 | 0 | 0 |
| 113 | 114 | 1 | 0 | 0 | 0 | 0 |
| 113 | 115 | 1 | 0 | 0 | 0 | 0 |
| 116 | 117 | 1 | 0 | 0 | 0 | 0 |
| 116 | 118 | 1 | 0 | 0 | 0 | 0 |
| 116 | 119 | 1 | 0 | 0 | 0 | 0 |
| 116 | 130 | 1 | 0 | 0 | 0 | 0 |
| 119 | 120 | 1 | 0 | 0 | 0 | 0 |
| 119 | 127 | 1 | 0 | 0 | 0 | 0 |
| 120 | 121 | 1 | 0 | 0 | 0 | 0 |
| 120 | 122 | 1 | 0 | 0 | 0 | 0 |
| 120 | 123 | 1 | 0 | 0 | 0 | 0 |
| 123 | 124 | 1 | 0 | 0 | 0 | 0 |
| 123 | 125 | 1 | 0 | 0 | 0 | 0 |
| 123 | 126 | 1 | 0 | 0 | 0 | 0 |
| 126 | 140 | 1 | 0 | 0 | 0 | 0 |
| 127 | 128 | 1 | 0 | 0 | 0 | 0 |
| 127 | 129 | 1 | 0 | 0 | 0 | 0 |
| 127 | 135 | 1 | 0 | 0 | 0 | 0 |
| 130 | 131 | 1 | 0 | 0 | 0 | 0 |
| 130 | 132 | 1 | 0 | 0 | 0 | 0 |
| 130 | 133 | 1 | 0 | 0 | 0 | 0 |
| 133 | 134 | 1 | 0 | 0 | 0 | 0 |
| 135 | 136 | 1 | 0 | 0 | 0 | 0 |
| 135 | 137 | 1 | 0 | 0 | 0 | 0 |
| 135 | 138 | 1 | 0 | 0 | 0 | 0 |
| 138 | 139 | 1 | 0 | 0 | 0 | 0 |
| 140 | 141 | 1 | 0 | 0 | 0 | 0 |
| 140 | 142 | 1 | 0 | 0 | 0 | 0 |
| 140 | 143 | 1 | 0 | 0 | 0 | 0 |
| 143 | 144 | 1 | 0 | 0 | 0 | 0 |
| 143 | 145 | 1 | 0 | 0 | 0 | 0 |
| 143 | 146 | 1 | 0 | 0 | 0 | 0 |
| 146 | 147 | 1 | 0 | 0 | 0 | 0 |
| 146 | 151 | 2 | 0 | 0 | 0 | 0 |
| 147 | 148 | 1 | 0 | 0 | 0 | 0 |
| 148 | 149 | 1 | 0 | 0 | 0 | 0 |
| 148 | 150 | 1 | 0 | 0 | 0 | 0 |
| 148 | 152 | 1 | 0 | 0 | 0 | 0 |
| 152 | 153 | 1 | 0 | 0 | 0 | 0 |
| 152 | 154 | 1 | 0 | 0 | 0 | 0 |
| 152 | 170 | 1 | 0 | 0 | 0 | 0 |
| 155 | 156 | 1 | 0 | 0 | 0 | 0 |
| 155 | 157 | 1 | 0 | 0 | 0 | 0 |
| 155 | 158 | 1 | 0 | 0 | 0 | 0 |
| 155 | 170 | 1 | 0 | 0 | 0 | 0 |
| 158 | 159 | 1 | 0 | 0 | 0 | 0 |
| 158 | 160 | 1 | 0 | 0 | 0 | 0 |
| 158 | 161 | 1 | 0 | 0 | 0 | 0 |
| 161 | 162 | 1 | 0 | 0 | 0 | 0 |
| 162 | 163 | 1 | 0 | 0 | 0 | 0 |
| 162 | 169 | 2 | 0 | 0 | 0 | 0 |
| 163 | 164 | 1 | 0 | 0 | 0 | 0 |
| 163 | 165 | 1 | 0 | 0 | 0 | 0 |
| 163 | 166 | 1 | 0 | 0 | 0 | 0 |
| 166 | 167 | 1 | 0 | 0 | 0 | 0 |
| 166 | 168 | 1 | 0 | 0 | 0 | 0 |
| 166 | 183 | 1 | 0 | 0 | 0 | 0 |
| 170 | 171 | 1 | 0 | 0 | 0 | 0 |
| 170 | 172 | 1 | 0 | 0 | 0 | 0 |
| 173 | 174 | 1 | 0 | 0 | 0 | 0 |

|        |   |   |   |   |   |
|--------|---|---|---|---|---|
| 173175 | 1 | 0 | 0 | 0 | 0 |
| 173176 | 1 | 0 | 0 | 0 | 0 |
| 173187 | 1 | 0 | 0 | 0 | 0 |
| 176177 | 1 | 0 | 0 | 0 | 0 |
| 176184 | 1 | 0 | 0 | 0 | 0 |
| 177178 | 1 | 0 | 0 | 0 | 0 |
| 177179 | 1 | 0 | 0 | 0 | 0 |
| 177180 | 1 | 0 | 0 | 0 | 0 |
| 180181 | 1 | 0 | 0 | 0 | 0 |
| 180182 | 1 | 0 | 0 | 0 | 0 |
| 180183 | 1 | 0 | 0 | 0 | 0 |
| 183197 | 1 | 0 | 0 | 0 | 0 |
| 184185 | 1 | 0 | 0 | 0 | 0 |
| 184186 | 1 | 0 | 0 | 0 | 0 |
| 184192 | 1 | 0 | 0 | 0 | 0 |
| 187188 | 1 | 0 | 0 | 0 | 0 |
| 187189 | 1 | 0 | 0 | 0 | 0 |
| 187190 | 1 | 0 | 0 | 0 | 0 |
| 190191 | 1 | 0 | 0 | 0 | 0 |
| 192193 | 1 | 0 | 0 | 0 | 0 |
| 192194 | 1 | 0 | 0 | 0 | 0 |
| 192195 | 1 | 0 | 0 | 0 | 0 |
| 195196 | 1 | 0 | 0 | 0 | 0 |
| 197198 | 1 | 0 | 0 | 0 | 0 |
| 197199 | 1 | 0 | 0 | 0 | 0 |
| 197200 | 1 | 0 | 0 | 0 | 0 |
| 200201 | 1 | 0 | 0 | 0 | 0 |
| 200202 | 1 | 0 | 0 | 0 | 0 |
| 200203 | 1 | 0 | 0 | 0 | 0 |
| 203204 | 1 | 0 | 0 | 0 | 0 |
| 203208 | 2 | 0 | 0 | 0 | 0 |
| 204205 | 1 | 0 | 0 | 0 | 0 |
| 205206 | 1 | 0 | 0 | 0 | 0 |
| 205207 | 1 | 0 | 0 | 0 | 0 |
| 205209 | 1 | 0 | 0 | 0 | 0 |
| 209210 | 1 | 0 | 0 | 0 | 0 |
| 209211 | 1 | 0 | 0 | 0 | 0 |
| 209227 | 1 | 0 | 0 | 0 | 0 |
| 212213 | 1 | 0 | 0 | 0 | 0 |
| 212214 | 1 | 0 | 0 | 0 | 0 |
| 212215 | 1 | 0 | 0 | 0 | 0 |
| 212227 | 1 | 0 | 0 | 0 | 0 |
| 215216 | 1 | 0 | 0 | 0 | 0 |
| 215217 | 1 | 0 | 0 | 0 | 0 |
| 215218 | 1 | 0 | 0 | 0 | 0 |
| 218219 | 1 | 0 | 0 | 0 | 0 |
| 219220 | 1 | 0 | 0 | 0 | 0 |
| 219226 | 2 | 0 | 0 | 0 | 0 |
| 220221 | 1 | 0 | 0 | 0 | 0 |
| 220222 | 1 | 0 | 0 | 0 | 0 |
| 220223 | 1 | 0 | 0 | 0 | 0 |
| 223224 | 1 | 0 | 0 | 0 | 0 |
| 223225 | 1 | 0 | 0 | 0 | 0 |
| 223240 | 1 | 0 | 0 | 0 | 0 |
| 227228 | 1 | 0 | 0 | 0 | 0 |
| 227229 | 1 | 0 | 0 | 0 | 0 |
| 230231 | 1 | 0 | 0 | 0 | 0 |
| 230232 | 1 | 0 | 0 | 0 | 0 |
| 230233 | 1 | 0 | 0 | 0 | 0 |
| 230244 | 1 | 0 | 0 | 0 | 0 |
| 233234 | 1 | 0 | 0 | 0 | 0 |
| 233241 | 1 | 0 | 0 | 0 | 0 |
| 234235 | 1 | 0 | 0 | 0 | 0 |
| 234236 | 1 | 0 | 0 | 0 | 0 |
| 234237 | 1 | 0 | 0 | 0 | 0 |
| 237238 | 1 | 0 | 0 | 0 | 0 |
| 237239 | 1 | 0 | 0 | 0 | 0 |
| 237240 | 1 | 0 | 0 | 0 | 0 |
| 240254 | 1 | 0 | 0 | 0 | 0 |
| 241242 | 1 | 0 | 0 | 0 | 0 |
| 241243 | 1 | 0 | 0 | 0 | 0 |
| 241249 | 1 | 0 | 0 | 0 | 0 |
| 244245 | 1 | 0 | 0 | 0 | 0 |
| 244246 | 1 | 0 | 0 | 0 | 0 |
| 244247 | 1 | 0 | 0 | 0 | 0 |
| 247248 | 1 | 0 | 0 | 0 | 0 |
| 249250 | 1 | 0 | 0 | 0 | 0 |
| 249251 | 1 | 0 | 0 | 0 | 0 |
| 249252 | 1 | 0 | 0 | 0 | 0 |
| 252253 | 1 | 0 | 0 | 0 | 0 |
| 254255 | 1 | 0 | 0 | 0 | 0 |

```

254256 1 0 0 0 0
254257 1 0 0 0 0
257258 1 0 0 0 0
257259 1 0 0 0 0
257260 1 0 0 0 0
260261 1 0 0 0 0
260265 2 0 0 0 0
261262 1 0 0 0 0
262263 1 0 0 0 0
262264 1 0 0 0 0
262266 1 0 0 0 0
266267 1 0 0 0 0
266268 1 0 0 0 0
266285 1 0 0 0 0
269270 1 0 0 0 0
269271 1 0 0 0 0
269272 1 0 0 0 0
269285 1 0 0 0 0
272273 1 0 0 0 0
272274 1 0 0 0 0
272275 1 0 0 0 0
275276 1 0 0 0 0
276277 1 0 0 0 0
276284 2 0 0 0 0
277278 1 0 0 0 0
277279 1 0 0 0 0
277280 1 0 0 0 0
280281 1 0 0 0 0
280282 1 0 0 0 0
280283 1 0 0 0 0
285286 1 0 0 0 0
285287 1 0 0 0 0

```

```

M END
> <NAME>
JJ86_1

```

```

$$$$
JJ94_1
MOE2012 3D

```

```

242246 0 0 1 0 0 0 0 0999 V2000
20.0270 -14.8510 -17.0890 N 0 0 0 0 0 0 0 0 0 0 0 0 0 0 0
19.5940 -14.9750 -18.3780 C 0 0 0 0 0 0 0 0 0 0 0 0 0 0 0
19.6710 -15.8960 -18.9390 H 0 0 0 0 0 0 0 0 0 0 0 0 0 0 0
19.0990 -13.7330 -18.7020 C 0 0 0 0 0 0 0 0 0 0 0 0 0 0 0
18.6630 -13.4180 -19.6400 H 0 0 0 0 0 0 0 0 0 0 0 0 0 0 0
19.2170 -12.8670 -17.6450 N 0 0 0 0 0 0 0 0 0 0 0 0 0 0 0
19.7740 -13.5710 -16.6860 C 0 0 0 0 0 0 0 0 0 0 0 0 0 0 0
20.0160 -13.2060 -15.6960 H 0 0 0 0 0 0 0 0 0 0 0 0 0 0 0
20.6450 -15.8880 -16.2870 C 0 0 0 0 0 0 0 0 0 0 0 0 0 0 0
20.3700 -15.6990 -15.2420 H 0 0 0 0 0 0 0 0 0 0 0 0 0 0 0
20.1980 -16.8450 -16.5810 H 0 0 0 0 0 0 0 0 0 0 0 0 0 0 0
22.1650 -15.9100 -16.4640 C 0 0 0 0 0 0 0 0 0 0 0 0 0 0 0
22.4040 -16.1400 -17.5090 H 0 0 0 0 0 0 0 0 0 0 0 0 0 0 0
22.5670 -14.9140 -16.2450 H 0 0 0 0 0 0 0 0 0 0 0 0 0 0 0
22.7620 -16.9110 -15.5790 N 0 0 3 0 0 0 0 0 0 0 0 0 0 0 0
22.6050 -16.6420 -14.5980 H 0 0 0 0 0 0 0 0 0 0 0 0 0 0 0
24.2080 -17.0650 -15.7720 C 0 0 0 0 0 0 0 0 0 0 0 0 0 0 0
24.5270 -17.9060 -15.1430 H 0 0 0 0 0 0 0 0 0 0 0 0 0 0 0
24.4110 -17.3670 -16.8060 H 0 0 0 0 0 0 0 0 0 0 0 0 0 0 0
25.0610 -15.8440 -15.4200 C 0 0 0 0 0 0 0 0 0 0 0 0 0 0 0
26.1160 -16.1210 -15.5310 H 0 0 0 0 0 0 0 0 0 0 0 0 0 0 0
24.8540 -15.0120 -16.1010 H 0 0 0 0 0 0 0 0 0 0 0 0 0 0 0
24.8480 -15.3660 -14.0030 C 0 0 0 0 0 0 0 0 0 0 0 0 0 0 0
25.8140 -14.4610 -13.6810 O 0 0 0 0 0 0 0 0 0 0 0 0 0 0 0
25.7000 -13.8960 -12.3660 C 0 0 0 0 0 0 0 0 0 0 0 0 0 0 0
24.7330 -13.3890 -12.2680 H 0 0 0 0 0 0 0 0 0 0 0 0 0 0 0
25.7730 -14.6960 -11.6190 H 0 0 0 0 0 0 0 0 0 0 0 0 0 0 0
23.9240 -15.7110 -13.2770 O 0 0 0 0 0 0 0 0 0 0 0 0 0 0 0
26.8390 -12.8990 -12.1860 C 0 0 0 0 0 0 0 0 0 0 0 0 0 0 0
27.7960 -13.4130 -12.3440 H 0 0 0 0 0 0 0 0 0 0 0 0 0 0 0
26.7770 -12.1350 -12.9710 H 0 0 0 0 0 0 0 0 0 0 0 0 0 0 0
27.9660 -11.2500 -10.6530 C 0 0 0 0 0 0 0 0 0 0 0 0 0 0 0
27.9030 -10.4740 -11.4260 H 0 0 0 0 0 0 0 0 0 0 0 0 0 0 0
28.9260 -11.7570 -10.8170 H 0 0 0 0 0 0 0 0 0 0 0 0 0 0 0
27.9780 -10.5910 -9.2780 C 0 0 0 0 0 0 0 0 0 0 0 0 0 0 0
27.0560 -10.0210 -9.1190 H 0 0 0 0 0 0 0 0 0 0 0 0 0 0 0
28.0820 -11.3520 -8.4960 H 0 0 0 0 0 0 0 0 0 0 0 0 0 0 0
29.0990 -9.6970 -9.2380 O 0 0 0 0 0 0 0 0 0 0 0 0 0 0 0
29.3390 -9.1230 -8.0270 C 0 0 0 0 0 0 0 0 0 0 0 0 0 0 0
30.5670 -8.2550 -8.0940 C 0 0 0 0 0 0 0 0 0 0 0 0 0 0 0

```







|        |    |   |   |   |   |   |
|--------|----|---|---|---|---|---|
| 39     | 46 | 2 | 0 | 0 | 0 | 0 |
| 40     | 41 | 1 | 0 | 0 | 0 | 0 |
| 40     | 42 | 1 | 0 | 0 | 0 | 0 |
| 40     | 43 | 1 | 0 | 0 | 0 | 0 |
| 43     | 44 | 1 | 0 | 0 | 0 | 0 |
| 43     | 45 | 1 | 0 | 0 | 0 | 0 |
| 43     | 64 | 1 | 0 | 0 | 0 | 0 |
| 47     | 48 | 1 | 0 | 0 | 0 | 0 |
| 47     | 49 | 1 | 0 | 0 | 0 | 0 |
| 50     | 51 | 1 | 0 | 0 | 0 | 0 |
| 50     | 56 | 1 | 0 | 0 | 0 | 0 |
| 50     | 58 | 1 | 0 | 0 | 0 | 0 |
| 51     | 52 | 1 | 0 | 0 | 0 | 0 |
| 51     | 53 | 2 | 0 | 0 | 0 | 0 |
| 53     | 54 | 1 | 0 | 0 | 0 | 0 |
| 53     | 55 | 1 | 0 | 0 | 0 | 0 |
| 55     | 56 | 2 | 0 | 0 | 0 | 0 |
| 56     | 57 | 1 | 0 | 0 | 0 | 0 |
| 58     | 59 | 1 | 0 | 0 | 0 | 0 |
| 58     | 60 | 1 | 0 | 0 | 0 | 0 |
| 58     | 61 | 1 | 0 | 0 | 0 | 0 |
| 61     | 62 | 1 | 0 | 0 | 0 | 0 |
| 61     | 63 | 1 | 0 | 0 | 0 | 0 |
| 61     | 64 | 1 | 0 | 0 | 0 | 0 |
| 64     | 65 | 1 | 0 | 0 | 0 | 0 |
| 65     | 66 | 1 | 0 | 0 | 0 | 0 |
| 65     | 67 | 1 | 0 | 0 | 0 | 0 |
| 65     | 68 | 1 | 0 | 0 | 0 | 0 |
| 68     | 69 | 1 | 0 | 0 | 0 | 0 |
| 68     | 70 | 1 | 0 | 0 | 0 | 0 |
| 68     | 71 | 1 | 0 | 0 | 0 | 0 |
| 71     | 72 | 1 | 0 | 0 | 0 | 0 |
| 71     | 76 | 2 | 0 | 0 | 0 | 0 |
| 72     | 73 | 1 | 0 | 0 | 0 | 0 |
| 73     | 74 | 1 | 0 | 0 | 0 | 0 |
| 73     | 75 | 1 | 0 | 0 | 0 | 0 |
| 73     | 77 | 1 | 0 | 0 | 0 | 0 |
| 77     | 78 | 1 | 0 | 0 | 0 | 0 |
| 77     | 79 | 1 | 0 | 0 | 0 | 0 |
| 77     | 95 | 1 | 0 | 0 | 0 | 0 |
| 80     | 81 | 1 | 0 | 0 | 0 | 0 |
| 80     | 82 | 1 | 0 | 0 | 0 | 0 |
| 80     | 83 | 1 | 0 | 0 | 0 | 0 |
| 80     | 95 | 1 | 0 | 0 | 0 | 0 |
| 83     | 84 | 1 | 0 | 0 | 0 | 0 |
| 83     | 85 | 1 | 0 | 0 | 0 | 0 |
| 83     | 86 | 1 | 0 | 0 | 0 | 0 |
| 86     | 87 | 1 | 0 | 0 | 0 | 0 |
| 87     | 88 | 1 | 0 | 0 | 0 | 0 |
| 87     | 94 | 2 | 0 | 0 | 0 | 0 |
| 88     | 89 | 1 | 0 | 0 | 0 | 0 |
| 88     | 90 | 1 | 0 | 0 | 0 | 0 |
| 88     | 91 | 1 | 0 | 0 | 0 | 0 |
| 91     | 92 | 1 | 0 | 0 | 0 | 0 |
| 91     | 93 | 1 | 0 | 0 | 0 | 0 |
| 91112  | 1  | 0 | 0 | 0 | 0 | 0 |
| 95     | 96 | 1 | 0 | 0 | 0 | 0 |
| 95     | 97 | 1 | 0 | 0 | 0 | 0 |
| 98     | 99 | 1 | 0 | 0 | 0 | 0 |
| 98104  | 1  | 0 | 0 | 0 | 0 | 0 |
| 98106  | 1  | 0 | 0 | 0 | 0 | 0 |
| 99100  | 1  | 0 | 0 | 0 | 0 | 0 |
| 99101  | 2  | 0 | 0 | 0 | 0 | 0 |
| 101102 | 1  | 0 | 0 | 0 | 0 | 0 |
| 101103 | 1  | 0 | 0 | 0 | 0 | 0 |
| 103104 | 2  | 0 | 0 | 0 | 0 | 0 |
| 104105 | 1  | 0 | 0 | 0 | 0 | 0 |
| 106107 | 1  | 0 | 0 | 0 | 0 | 0 |
| 106108 | 1  | 0 | 0 | 0 | 0 | 0 |
| 106109 | 1  | 0 | 0 | 0 | 0 | 0 |
| 109110 | 1  | 0 | 0 | 0 | 0 | 0 |
| 109111 | 1  | 0 | 0 | 0 | 0 | 0 |
| 109112 | 1  | 0 | 0 | 0 | 0 | 0 |
| 112113 | 1  | 0 | 0 | 0 | 0 | 0 |
| 113114 | 1  | 0 | 0 | 0 | 0 | 0 |
| 113115 | 1  | 0 | 0 | 0 | 0 | 0 |
| 113116 | 1  | 0 | 0 | 0 | 0 | 0 |
| 116117 | 1  | 0 | 0 | 0 | 0 | 0 |
| 116118 | 1  | 0 | 0 | 0 | 0 | 0 |
| 116119 | 1  | 0 | 0 | 0 | 0 | 0 |
| 119120 | 1  | 0 | 0 | 0 | 0 | 0 |

|        |   |   |   |   |   |
|--------|---|---|---|---|---|
| 119124 | 2 | 0 | 0 | 0 | 0 |
| 120121 | 1 | 0 | 0 | 0 | 0 |
| 121122 | 1 | 0 | 0 | 0 | 0 |
| 121123 | 1 | 0 | 0 | 0 | 0 |
| 121125 | 1 | 0 | 0 | 0 | 0 |
| 125126 | 1 | 0 | 0 | 0 | 0 |
| 125127 | 1 | 0 | 0 | 0 | 0 |
| 125143 | 1 | 0 | 0 | 0 | 0 |
| 128129 | 1 | 0 | 0 | 0 | 0 |
| 128130 | 1 | 0 | 0 | 0 | 0 |
| 128131 | 1 | 0 | 0 | 0 | 0 |
| 128143 | 1 | 0 | 0 | 0 | 0 |
| 131132 | 1 | 0 | 0 | 0 | 0 |
| 131133 | 1 | 0 | 0 | 0 | 0 |
| 131134 | 1 | 0 | 0 | 0 | 0 |
| 134135 | 1 | 0 | 0 | 0 | 0 |
| 135136 | 1 | 0 | 0 | 0 | 0 |
| 135142 | 2 | 0 | 0 | 0 | 0 |
| 136137 | 1 | 0 | 0 | 0 | 0 |
| 136138 | 1 | 0 | 0 | 0 | 0 |
| 136139 | 1 | 0 | 0 | 0 | 0 |
| 139140 | 1 | 0 | 0 | 0 | 0 |
| 139141 | 1 | 0 | 0 | 0 | 0 |
| 139160 | 1 | 0 | 0 | 0 | 0 |
| 143144 | 1 | 0 | 0 | 0 | 0 |
| 143145 | 1 | 0 | 0 | 0 | 0 |
| 146147 | 1 | 0 | 0 | 0 | 0 |
| 146152 | 1 | 0 | 0 | 0 | 0 |
| 146154 | 1 | 0 | 0 | 0 | 0 |
| 147148 | 1 | 0 | 0 | 0 | 0 |
| 147149 | 2 | 0 | 0 | 0 | 0 |
| 149150 | 1 | 0 | 0 | 0 | 0 |
| 149151 | 1 | 0 | 0 | 0 | 0 |
| 151152 | 2 | 0 | 0 | 0 | 0 |
| 152153 | 1 | 0 | 0 | 0 | 0 |
| 154155 | 1 | 0 | 0 | 0 | 0 |
| 154156 | 1 | 0 | 0 | 0 | 0 |
| 154157 | 1 | 0 | 0 | 0 | 0 |
| 157158 | 1 | 0 | 0 | 0 | 0 |
| 157159 | 1 | 0 | 0 | 0 | 0 |
| 157160 | 1 | 0 | 0 | 0 | 0 |
| 160161 | 1 | 0 | 0 | 0 | 0 |
| 161162 | 1 | 0 | 0 | 0 | 0 |
| 161163 | 1 | 0 | 0 | 0 | 0 |
| 161164 | 1 | 0 | 0 | 0 | 0 |
| 164165 | 1 | 0 | 0 | 0 | 0 |
| 164166 | 1 | 0 | 0 | 0 | 0 |
| 164167 | 1 | 0 | 0 | 0 | 0 |
| 167168 | 1 | 0 | 0 | 0 | 0 |
| 167172 | 2 | 0 | 0 | 0 | 0 |
| 168169 | 1 | 0 | 0 | 0 | 0 |
| 169170 | 1 | 0 | 0 | 0 | 0 |
| 169171 | 1 | 0 | 0 | 0 | 0 |
| 169173 | 1 | 0 | 0 | 0 | 0 |
| 173174 | 1 | 0 | 0 | 0 | 0 |
| 173175 | 1 | 0 | 0 | 0 | 0 |
| 173191 | 1 | 0 | 0 | 0 | 0 |
| 176177 | 1 | 0 | 0 | 0 | 0 |
| 176178 | 1 | 0 | 0 | 0 | 0 |
| 176179 | 1 | 0 | 0 | 0 | 0 |
| 176191 | 1 | 0 | 0 | 0 | 0 |
| 179180 | 1 | 0 | 0 | 0 | 0 |
| 179181 | 1 | 0 | 0 | 0 | 0 |
| 179182 | 1 | 0 | 0 | 0 | 0 |
| 182183 | 1 | 0 | 0 | 0 | 0 |
| 183184 | 1 | 0 | 0 | 0 | 0 |
| 183190 | 2 | 0 | 0 | 0 | 0 |
| 184185 | 1 | 0 | 0 | 0 | 0 |
| 184186 | 1 | 0 | 0 | 0 | 0 |
| 184187 | 1 | 0 | 0 | 0 | 0 |
| 187188 | 1 | 0 | 0 | 0 | 0 |
| 187189 | 1 | 0 | 0 | 0 | 0 |
| 187208 | 1 | 0 | 0 | 0 | 0 |
| 191192 | 1 | 0 | 0 | 0 | 0 |
| 191193 | 1 | 0 | 0 | 0 | 0 |
| 194195 | 1 | 0 | 0 | 0 | 0 |
| 194200 | 1 | 0 | 0 | 0 | 0 |
| 194202 | 1 | 0 | 0 | 0 | 0 |
| 195196 | 1 | 0 | 0 | 0 | 0 |
| 195197 | 2 | 0 | 0 | 0 | 0 |
| 197198 | 1 | 0 | 0 | 0 | 0 |



```

197199 1 0 0 0 0
199200 2 0 0 0 0
200201 1 0 0 0 0
202203 1 0 0 0 0
202204 1 0 0 0 0
202205 1 0 0 0 0
205206 1 0 0 0 0
205207 1 0 0 0 0
205208 1 0 0 0 0
208209 1 0 0 0 0
209210 1 0 0 0 0
209211 1 0 0 0 0
209212 1 0 0 0 0
212213 1 0 0 0 0
212214 1 0 0 0 0
212215 1 0 0 0 0
215216 1 0 0 0 0
215220 2 0 0 0 0
216217 1 0 0 0 0
217218 1 0 0 0 0
217219 1 0 0 0 0
217221 1 0 0 0 0
221222 1 0 0 0 0
221223 1 0 0 0 0
221240 1 0 0 0 0
224225 1 0 0 0 0
224226 1 0 0 0 0
224227 1 0 0 0 0
224240 1 0 0 0 0
227228 1 0 0 0 0
227229 1 0 0 0 0
227230 1 0 0 0 0
230231 1 0 0 0 0
231232 1 0 0 0 0
231239 2 0 0 0 0
232233 1 0 0 0 0
232234 1 0 0 0 0
232235 1 0 0 0 0
235236 1 0 0 0 0
235237 1 0 0 0 0
235238 1 0 0 0 0
240241 1 0 0 0 0
240242 1 0 0 0 0

```

```

M END
> <NAME>
JJ94_1

```

```

$$$$
LL6_1
MOE2012 3D

```

```

312316 0 0 1 0 0 0 0 0 0999 V2000
57.2920 -13.7380 19.8980 C 0 0 0 0 0 0 0 0 0 0 0 0 0 0 0
57.6730 -13.6430 20.9210 H 0 0 0 0 0 0 0 0 0 0 0 0 0 0 0
57.1700 -12.4270 19.3300 O 0 0 0 0 0 0 0 0 0 0 0 0 0 0 0
58.3150 -12.3010 18.4890 C 0 0 0 0 0 0 0 0 0 0 0 0 0 0 0
58.1300 -11.5830 17.6860 H 0 0 0 0 0 0 0 0 0 0 0 0 0 0 0
59.1530 -11.9530 19.1030 H 0 0 0 0 0 0 0 0 0 0 0 0 0 0 0
58.5310 -13.7060 17.9980 C 0 0 0 0 0 0 0 0 0 0 0 0 0 0 0
57.8170 -13.9710 17.2100 H 0 0 0 0 0 0 0 0 0 0 0 0 0 0 0
59.5480 -13.8910 17.6430 H 0 0 0 0 0 0 0 0 0 0 0 0 0 0 0
58.2410 -14.5070 19.1430 O 0 0 0 0 0 0 0 0 0 0 0 0 0 0 0
55.9390 -14.4430 19.8890 C 0 0 0 0 0 0 0 0 0 0 0 0 0 0 0
55.5840 -14.5330 18.8530 H 0 0 0 0 0 0 0 0 0 0 0 0 0 0 0
56.0610 -15.4670 20.2640 H 0 0 0 0 0 0 0 0 0 0 0 0 0 0 0
54.9030 -13.6850 20.7190 C 0 0 0 0 0 0 0 0 0 0 0 0 0 0 0
55.2740 -13.5740 21.7450 H 0 0 0 0 0 0 0 0 0 0 0 0 0 0 0
54.7600 -12.6860 20.2960 H 0 0 0 0 0 0 0 0 0 0 0 0 0 0 0
53.6400 -14.4220 20.7190 N 0 0 3 0 0 0 0 0 0 0 0 0 0 0 0
53.2770 -14.4940 19.7680 H 0 0 0 0 0 0 0 0 0 0 0 0 0 0 0
52.6280 -13.8490 21.6110 C 0 0 0 0 0 0 0 0 0 0 0 0 0 0 0
53.0300 -13.7410 22.6250 H 0 0 0 0 0 0 0 0 0 0 0 0 0 0 0
51.8310 -14.5990 21.6860 H 0 0 0 0 0 0 0 0 0 0 0 0 0 0 0
51.9890 -12.5550 21.1060 C 0 0 0 0 0 0 0 0 0 0 0 0 0 0 0
51.8700 -12.5870 20.0170 H 0 0 0 0 0 0 0 0 0 0 0 0 0 0 0
50.9870 -12.4420 21.5360 H 0 0 0 0 0 0 0 0 0 0 0 0 0 0 0
52.7730 -11.3340 21.5130 C 0 0 0 0 0 0 0 0 0 0 0 0 0 0 0
52.8060 -10.4390 20.4860 O 0 0 0 0 0 0 0 0 0 0 0 0 0 0 0
53.5540 -9.2450 20.7570 C 0 0 0 0 0 0 0 0 0 0 0 0 0 0 0
53.0940 -8.7110 21.5970 H 0 0 0 0 0 0 0 0 0 0 0 0 0 0 0
54.5870 -9.5110 21.0110 H 0 0 0 0 0 0 0 0 0 0 0 0 0 0 0

```







|         |         |        |   |   |   |   |   |   |   |   |   |   |   |   |   |   |   |   |
|---------|---------|--------|---|---|---|---|---|---|---|---|---|---|---|---|---|---|---|---|
| 79.6900 | 12.9040 | 3.5940 | C | 0 | 0 | 0 | 0 | 0 | 0 | 0 | 0 | 0 | 0 | 0 | 0 | 0 | 0 | 0 |
| 80.6490 | 13.3310 | 4.4650 | O | 0 | 0 | 0 | 0 | 0 | 0 | 0 | 0 | 0 | 0 | 0 | 0 | 0 | 0 | 0 |
| 82.0120 | 13.1850 | 4.0300 | C | 0 | 0 | 0 | 0 | 0 | 0 | 0 | 0 | 0 | 0 | 0 | 0 | 0 | 0 | 0 |
| 82.1040 | 13.3880 | 2.9560 | H | 0 | 0 | 0 | 0 | 0 | 0 | 0 | 0 | 0 | 0 | 0 | 0 | 0 | 0 | 0 |
| 82.5940 | 13.9510 | 4.5520 | H | 0 | 0 | 0 | 0 | 0 | 0 | 0 | 0 | 0 | 0 | 0 | 0 | 0 | 0 | 0 |
| 79.9010 | 12.3910 | 2.5040 | O | 0 | 0 | 0 | 0 | 0 | 0 | 0 | 0 | 0 | 0 | 0 | 0 | 0 | 0 | 0 |
| 82.5280 | 11.7960 | 4.3920 | C | 0 | 0 | 0 | 0 | 0 | 0 | 0 | 0 | 0 | 0 | 0 | 0 | 0 | 0 | 0 |
| 82.4090 | 11.6360 | 5.4710 | H | 0 | 0 | 0 | 0 | 0 | 0 | 0 | 0 | 0 | 0 | 0 | 0 | 0 | 0 | 0 |
| 81.9090 | 11.0320 | 3.9060 | H | 0 | 0 | 0 | 0 | 0 | 0 | 0 | 0 | 0 | 0 | 0 | 0 | 0 | 0 | 0 |
| 83.9910 | 11.6180 | 3.9880 | C | 0 | 0 | 0 | 0 | 0 | 0 | 0 | 0 | 0 | 0 | 0 | 0 | 0 | 0 | 0 |
| 84.0950 | 11.7780 | 2.9080 | H | 0 | 0 | 0 | 0 | 0 | 0 | 0 | 0 | 0 | 0 | 0 | 0 | 0 | 0 | 0 |
| 84.6050 | 12.3770 | 4.4890 | H | 0 | 0 | 0 | 0 | 0 | 0 | 0 | 0 | 0 | 0 | 0 | 0 | 0 | 0 | 0 |
| 84.5030 | 10.2230 | 4.3510 | C | 0 | 0 | 0 | 0 | 0 | 0 | 0 | 0 | 0 | 0 | 0 | 0 | 0 | 0 | 0 |
| 84.4000 | 10.0630 | 5.4310 | H | 0 | 0 | 0 | 0 | 0 | 0 | 0 | 0 | 0 | 0 | 0 | 0 | 0 | 0 | 0 |
| 83.8880 | 9.4650  | 3.8510 | H | 0 | 0 | 0 | 0 | 0 | 0 | 0 | 0 | 0 | 0 | 0 | 0 | 0 | 0 | 0 |
| 85.9670 | 10.0450 | 3.9430 | C | 0 | 0 | 0 | 0 | 0 | 0 | 0 | 0 | 0 | 0 | 0 | 0 | 0 | 0 | 0 |
| 86.0700 | 10.2090 | 2.8640 | H | 0 | 0 | 0 | 0 | 0 | 0 | 0 | 0 | 0 | 0 | 0 | 0 | 0 | 0 | 0 |
| 86.5820 | 10.8020 | 4.4450 | H | 0 | 0 | 0 | 0 | 0 | 0 | 0 | 0 | 0 | 0 | 0 | 0 | 0 | 0 | 0 |
| 86.4800 | 8.6490  | 4.3010 | C | 0 | 0 | 0 | 0 | 0 | 0 | 0 | 0 | 0 | 0 | 0 | 0 | 0 | 0 | 0 |
| 86.3780 | 8.4860  | 5.3810 | H | 0 | 0 | 0 | 0 | 0 | 0 | 0 | 0 | 0 | 0 | 0 | 0 | 0 | 0 | 0 |
| 85.8640 | 7.8920  | 3.8000 | H | 0 | 0 | 0 | 0 | 0 | 0 | 0 | 0 | 0 | 0 | 0 | 0 | 0 | 0 | 0 |
| 87.9430 | 8.4710  | 3.8920 | C | 0 | 0 | 0 | 0 | 0 | 0 | 0 | 0 | 0 | 0 | 0 | 0 | 0 | 0 | 0 |
| 88.0450 | 8.6360  | 2.8120 | H | 0 | 0 | 0 | 0 | 0 | 0 | 0 | 0 | 0 | 0 | 0 | 0 | 0 | 0 | 0 |
| 88.5590 | 9.2270  | 4.3940 | H | 0 | 0 | 0 | 0 | 0 | 0 | 0 | 0 | 0 | 0 | 0 | 0 | 0 | 0 | 0 |
| 88.4540 | 7.0770  | 4.2460 | C | 0 | 0 | 0 | 0 | 0 | 0 | 0 | 0 | 0 | 0 | 0 | 0 | 0 | 0 | 0 |
| 88.3520 | 6.8960  | 5.3240 | H | 0 | 0 | 0 | 0 | 0 | 0 | 0 | 0 | 0 | 0 | 0 | 0 | 0 | 0 | 0 |
| 87.8410 | 6.3110  | 3.7540 | H | 0 | 0 | 0 | 0 | 0 | 0 | 0 | 0 | 0 | 0 | 0 | 0 | 0 | 0 | 0 |
| 89.9130 | 6.8920  | 3.8410 | C | 0 | 0 | 0 | 0 | 0 | 0 | 0 | 0 | 0 | 0 | 0 | 0 | 0 | 0 | 0 |
| 90.0230 | 7.0210  | 2.7580 | H | 0 | 0 | 0 | 0 | 0 | 0 | 0 | 0 | 0 | 0 | 0 | 0 | 0 | 0 | 0 |
| 90.5450 | 7.6180  | 4.3640 | H | 0 | 0 | 0 | 0 | 0 | 0 | 0 | 0 | 0 | 0 | 0 | 0 | 0 | 0 | 0 |
| 90.3110 | 5.5620  | 4.2050 | O | 0 | 0 | 0 | 0 | 0 | 0 | 0 | 0 | 0 | 0 | 0 | 0 | 0 | 0 | 0 |
| 91.6040 | 5.2530  | 3.8980 | C | 0 | 0 | 0 | 0 | 0 | 0 | 0 | 0 | 0 | 0 | 0 | 0 | 0 | 0 | 0 |
| 91.8910 | 3.8350  | 4.3310 | C | 0 | 0 | 0 | 0 | 0 | 0 | 0 | 0 | 0 | 0 | 0 | 0 | 0 | 0 | 0 |
| 91.7240 | 3.7610  | 5.4110 | H | 0 | 0 | 0 | 0 | 0 | 0 | 0 | 0 | 0 | 0 | 0 | 0 | 0 | 0 | 0 |
| 91.1940 | 3.1660  | 3.8130 | H | 0 | 0 | 0 | 0 | 0 | 0 | 0 | 0 | 0 | 0 | 0 | 0 | 0 | 0 | 0 |
| 93.3160 | 3.4180  | 4.0130 | C | 0 | 0 | 0 | 0 | 0 | 0 | 0 | 0 | 0 | 0 | 0 | 0 | 0 | 0 | 0 |
| 93.5130 | 3.4780  | 2.9370 | H | 0 | 0 | 0 | 0 | 0 | 0 | 0 | 0 | 0 | 0 | 0 | 0 | 0 | 0 | 0 |
| 93.4940 | 2.3880  | 4.3370 | H | 0 | 0 | 0 | 0 | 0 | 0 | 0 | 0 | 0 | 0 | 0 | 0 | 0 | 0 | 0 |
| 94.0380 | 4.0660  | 4.5210 | H | 0 | 0 | 0 | 0 | 0 | 0 | 0 | 0 | 0 | 0 | 0 | 0 | 0 | 0 | 0 |
| 92.4020 | 6.0050  | 3.3590 | O | 0 | 0 | 0 | 0 | 0 | 0 | 0 | 0 | 0 | 0 | 0 | 0 | 0 | 0 | 0 |
| 1       | 2       | 1      | 0 | 0 | 0 | 0 |   |   |   |   |   |   |   |   |   |   |   |   |
| 1       | 3       | 1      | 0 | 0 | 0 | 0 |   |   |   |   |   |   |   |   |   |   |   |   |
| 1       | 10      | 1      | 0 | 0 | 0 | 0 |   |   |   |   |   |   |   |   |   |   |   |   |
| 1       | 11      | 1      | 0 | 0 | 0 | 0 |   |   |   |   |   |   |   |   |   |   |   |   |
| 3       | 4       | 1      | 0 | 0 | 0 | 0 |   |   |   |   |   |   |   |   |   |   |   |   |
| 4       | 5       | 1      | 0 | 0 | 0 | 0 |   |   |   |   |   |   |   |   |   |   |   |   |
| 4       | 6       | 1      | 0 | 0 | 0 | 0 |   |   |   |   |   |   |   |   |   |   |   |   |
| 4       | 7       | 1      | 0 | 0 | 0 | 0 |   |   |   |   |   |   |   |   |   |   |   |   |
| 7       | 8       | 1      | 0 | 0 | 0 | 0 |   |   |   |   |   |   |   |   |   |   |   |   |
| 7       | 9       | 1      | 0 | 0 | 0 | 0 |   |   |   |   |   |   |   |   |   |   |   |   |
| 7       | 10      | 1      | 0 | 0 | 0 | 0 |   |   |   |   |   |   |   |   |   |   |   |   |
| 11      | 12      | 1      | 0 | 0 | 0 | 0 |   |   |   |   |   |   |   |   |   |   |   |   |
| 11      | 13      | 1      | 0 | 0 | 0 | 0 |   |   |   |   |   |   |   |   |   |   |   |   |
| 11      | 14      | 1      | 0 | 0 | 0 | 0 |   |   |   |   |   |   |   |   |   |   |   |   |
| 14      | 15      | 1      | 0 | 0 | 0 | 0 |   |   |   |   |   |   |   |   |   |   |   |   |
| 14      | 16      | 1      | 0 | 0 | 0 | 0 |   |   |   |   |   |   |   |   |   |   |   |   |
| 14      | 17      | 1      | 0 | 0 | 0 | 0 |   |   |   |   |   |   |   |   |   |   |   |   |
| 17      | 18      | 1      | 0 | 0 | 0 | 0 |   |   |   |   |   |   |   |   |   |   |   |   |
| 17      | 19      | 1      | 0 | 0 | 0 | 0 |   |   |   |   |   |   |   |   |   |   |   |   |
| 19      | 20      | 1      | 0 | 0 | 0 | 0 |   |   |   |   |   |   |   |   |   |   |   |   |
| 19      | 21      | 1      | 0 | 0 | 0 | 0 |   |   |   |   |   |   |   |   |   |   |   |   |
| 19      | 22      | 1      | 0 | 0 | 0 | 0 |   |   |   |   |   |   |   |   |   |   |   |   |
| 22      | 23      | 1      | 0 | 0 | 0 | 0 |   |   |   |   |   |   |   |   |   |   |   |   |
| 22      | 24      | 1      | 0 | 0 | 0 | 0 |   |   |   |   |   |   |   |   |   |   |   |   |
| 22      | 25      | 1      | 0 | 0 | 0 | 0 |   |   |   |   |   |   |   |   |   |   |   |   |
| 25      | 26      | 1      | 0 | 0 | 0 | 0 |   |   |   |   |   |   |   |   |   |   |   |   |
| 25      | 30      | 2      | 0 | 0 | 0 | 0 |   |   |   |   |   |   |   |   |   |   |   |   |
| 26      | 27      | 1      | 0 | 0 | 0 | 0 |   |   |   |   |   |   |   |   |   |   |   |   |
| 27      | 28      | 1      | 0 | 0 | 0 | 0 |   |   |   |   |   |   |   |   |   |   |   |   |
| 27      | 29      | 1      | 0 | 0 | 0 | 0 |   |   |   |   |   |   |   |   |   |   |   |   |
| 27      | 31      | 1      | 0 | 0 | 0 | 0 |   |   |   |   |   |   |   |   |   |   |   |   |
| 31      | 32      | 1      | 0 | 0 | 0 | 0 |   |   |   |   |   |   |   |   |   |   |   |   |
| 31      | 33      | 1      | 0 | 0 | 0 | 0 |   |   |   |   |   |   |   |   |   |   |   |   |
| 31      | 34      | 1      | 0 | 0 | 0 | 0 |   |   |   |   |   |   |   |   |   |   |   |   |
| 34      | 35      | 1      | 0 | 0 | 0 | 0 |   |   |   |   |   |   |   |   |   |   |   |   |
| 34      | 36      | 1      | 0 | 0 | 0 | 0 |   |   |   |   |   |   |   |   |   |   |   |   |
| 34      | 37      | 1      | 0 | 0 | 0 | 0 |   |   |   |   |   |   |   |   |   |   |   |   |
| 37      | 38      | 1      | 0 | 0 | 0 | 0 |   |   |   |   |   |   |   |   |   |   |   |   |
| 37      | 39      | 1      | 0 | 0 | 0 | 0 |   |   |   |   |   |   |   |   |   |   |   |   |
| 37      | 40      | 1      | 0 | 0 | 0 | 0 |   |   |   |   |   |   |   |   |   |   |   |   |
| 40      | 41      | 1      | 0 | 0 | 0 | 0 |   |   |   |   |   |   |   |   |   |   |   |   |

|     |     |   |   |   |   |   |
|-----|-----|---|---|---|---|---|
| 40  | 42  | 1 | 0 | 0 | 0 | 0 |
| 40  | 43  | 1 | 0 | 0 | 0 | 0 |
| 43  | 44  | 1 | 0 | 0 | 0 | 0 |
| 43  | 45  | 1 | 0 | 0 | 0 | 0 |
| 43  | 46  | 1 | 0 | 0 | 0 | 0 |
| 46  | 47  | 1 | 0 | 0 | 0 | 0 |
| 46  | 48  | 1 | 0 | 0 | 0 | 0 |
| 46  | 49  | 1 | 0 | 0 | 0 | 0 |
| 49  | 50  | 1 | 0 | 0 | 0 | 0 |
| 49  | 51  | 1 | 0 | 0 | 0 | 0 |
| 49  | 52  | 1 | 0 | 0 | 0 | 0 |
| 52  | 53  | 1 | 0 | 0 | 0 | 0 |
| 52  | 54  | 1 | 0 | 0 | 0 | 0 |
| 52  | 55  | 1 | 0 | 0 | 0 | 0 |
| 55  | 56  | 1 | 0 | 0 | 0 | 0 |
| 56  | 57  | 1 | 0 | 0 | 0 | 0 |
| 56  | 63  | 2 | 0 | 0 | 0 | 0 |
| 57  | 58  | 1 | 0 | 0 | 0 | 0 |
| 57  | 59  | 1 | 0 | 0 | 0 | 0 |
| 57  | 60  | 1 | 0 | 0 | 0 | 0 |
| 60  | 61  | 1 | 0 | 0 | 0 | 0 |
| 60  | 62  | 1 | 0 | 0 | 0 | 0 |
| 60  | 80  | 1 | 0 | 0 | 0 | 0 |
| 64  | 65  | 1 | 0 | 0 | 0 | 0 |
| 64  | 66  | 1 | 0 | 0 | 0 | 0 |
| 64  | 73  | 1 | 0 | 0 | 0 | 0 |
| 64  | 74  | 1 | 0 | 0 | 0 | 0 |
| 66  | 67  | 1 | 0 | 0 | 0 | 0 |
| 67  | 68  | 1 | 0 | 0 | 0 | 0 |
| 67  | 69  | 1 | 0 | 0 | 0 | 0 |
| 67  | 70  | 1 | 0 | 0 | 0 | 0 |
| 70  | 71  | 1 | 0 | 0 | 0 | 0 |
| 70  | 72  | 1 | 0 | 0 | 0 | 0 |
| 70  | 73  | 1 | 0 | 0 | 0 | 0 |
| 74  | 75  | 1 | 0 | 0 | 0 | 0 |
| 74  | 76  | 1 | 0 | 0 | 0 | 0 |
| 74  | 77  | 1 | 0 | 0 | 0 | 0 |
| 77  | 78  | 1 | 0 | 0 | 0 | 0 |
| 77  | 79  | 1 | 0 | 0 | 0 | 0 |
| 77  | 80  | 1 | 0 | 0 | 0 | 0 |
| 80  | 81  | 1 | 0 | 0 | 0 | 0 |
| 81  | 82  | 1 | 0 | 0 | 0 | 0 |
| 81  | 83  | 1 | 0 | 0 | 0 | 0 |
| 81  | 84  | 1 | 0 | 0 | 0 | 0 |
| 84  | 85  | 1 | 0 | 0 | 0 | 0 |
| 84  | 86  | 1 | 0 | 0 | 0 | 0 |
| 84  | 87  | 1 | 0 | 0 | 0 | 0 |
| 87  | 88  | 1 | 0 | 0 | 0 | 0 |
| 87  | 92  | 2 | 0 | 0 | 0 | 0 |
| 88  | 89  | 1 | 0 | 0 | 0 | 0 |
| 89  | 90  | 1 | 0 | 0 | 0 | 0 |
| 89  | 91  | 1 | 0 | 0 | 0 | 0 |
| 89  | 93  | 1 | 0 | 0 | 0 | 0 |
| 93  | 94  | 1 | 0 | 0 | 0 | 0 |
| 93  | 95  | 1 | 0 | 0 | 0 | 0 |
| 93  | 96  | 1 | 0 | 0 | 0 | 0 |
| 96  | 97  | 1 | 0 | 0 | 0 | 0 |
| 96  | 98  | 1 | 0 | 0 | 0 | 0 |
| 96  | 99  | 1 | 0 | 0 | 0 | 0 |
| 99  | 100 | 1 | 0 | 0 | 0 | 0 |
| 99  | 101 | 1 | 0 | 0 | 0 | 0 |
| 99  | 102 | 1 | 0 | 0 | 0 | 0 |
| 102 | 103 | 1 | 0 | 0 | 0 | 0 |
| 102 | 104 | 1 | 0 | 0 | 0 | 0 |
| 102 | 105 | 1 | 0 | 0 | 0 | 0 |
| 105 | 106 | 1 | 0 | 0 | 0 | 0 |
| 105 | 107 | 1 | 0 | 0 | 0 | 0 |
| 105 | 108 | 1 | 0 | 0 | 0 | 0 |
| 108 | 109 | 1 | 0 | 0 | 0 | 0 |
| 108 | 110 | 1 | 0 | 0 | 0 | 0 |
| 108 | 111 | 1 | 0 | 0 | 0 | 0 |
| 111 | 112 | 1 | 0 | 0 | 0 | 0 |
| 111 | 113 | 1 | 0 | 0 | 0 | 0 |
| 111 | 114 | 1 | 0 | 0 | 0 | 0 |
| 114 | 115 | 1 | 0 | 0 | 0 | 0 |
| 114 | 116 | 1 | 0 | 0 | 0 | 0 |
| 114 | 117 | 1 | 0 | 0 | 0 | 0 |
| 117 | 118 | 1 | 0 | 0 | 0 | 0 |
| 118 | 119 | 1 | 0 | 0 | 0 | 0 |
| 118 | 125 | 2 | 0 | 0 | 0 | 0 |
| 119 | 120 | 1 | 0 | 0 | 0 | 0 |

|        |   |   |   |   |   |
|--------|---|---|---|---|---|
| 119121 | 1 | 0 | 0 | 0 | 0 |
| 119122 | 1 | 0 | 0 | 0 | 0 |
| 122123 | 1 | 0 | 0 | 0 | 0 |
| 122124 | 1 | 0 | 0 | 0 | 0 |
| 122142 | 1 | 0 | 0 | 0 | 0 |
| 126127 | 1 | 0 | 0 | 0 | 0 |
| 126128 | 1 | 0 | 0 | 0 | 0 |
| 126135 | 1 | 0 | 0 | 0 | 0 |
| 126136 | 1 | 0 | 0 | 0 | 0 |
| 128129 | 1 | 0 | 0 | 0 | 0 |
| 129130 | 1 | 0 | 0 | 0 | 0 |
| 129131 | 1 | 0 | 0 | 0 | 0 |
| 129132 | 1 | 0 | 0 | 0 | 0 |
| 132133 | 1 | 0 | 0 | 0 | 0 |
| 132134 | 1 | 0 | 0 | 0 | 0 |
| 132135 | 1 | 0 | 0 | 0 | 0 |
| 136137 | 1 | 0 | 0 | 0 | 0 |
| 136138 | 1 | 0 | 0 | 0 | 0 |
| 136139 | 1 | 0 | 0 | 0 | 0 |
| 139140 | 1 | 0 | 0 | 0 | 0 |
| 139141 | 1 | 0 | 0 | 0 | 0 |
| 139142 | 1 | 0 | 0 | 0 | 0 |
| 142143 | 1 | 0 | 0 | 0 | 0 |
| 143144 | 1 | 0 | 0 | 0 | 0 |
| 143145 | 1 | 0 | 0 | 0 | 0 |
| 143146 | 1 | 0 | 0 | 0 | 0 |
| 146147 | 1 | 0 | 0 | 0 | 0 |
| 146148 | 1 | 0 | 0 | 0 | 0 |
| 146149 | 1 | 0 | 0 | 0 | 0 |
| 149150 | 1 | 0 | 0 | 0 | 0 |
| 149154 | 2 | 0 | 0 | 0 | 0 |
| 150151 | 1 | 0 | 0 | 0 | 0 |
| 151152 | 1 | 0 | 0 | 0 | 0 |
| 151153 | 1 | 0 | 0 | 0 | 0 |
| 151155 | 1 | 0 | 0 | 0 | 0 |
| 155156 | 1 | 0 | 0 | 0 | 0 |
| 155157 | 1 | 0 | 0 | 0 | 0 |
| 155158 | 1 | 0 | 0 | 0 | 0 |
| 158159 | 1 | 0 | 0 | 0 | 0 |
| 158160 | 1 | 0 | 0 | 0 | 0 |
| 158161 | 1 | 0 | 0 | 0 | 0 |
| 161162 | 1 | 0 | 0 | 0 | 0 |
| 161163 | 1 | 0 | 0 | 0 | 0 |
| 161164 | 1 | 0 | 0 | 0 | 0 |
| 164165 | 1 | 0 | 0 | 0 | 0 |
| 164166 | 1 | 0 | 0 | 0 | 0 |
| 164167 | 1 | 0 | 0 | 0 | 0 |
| 167168 | 1 | 0 | 0 | 0 | 0 |
| 167169 | 1 | 0 | 0 | 0 | 0 |
| 167170 | 1 | 0 | 0 | 0 | 0 |
| 170171 | 1 | 0 | 0 | 0 | 0 |
| 170172 | 1 | 0 | 0 | 0 | 0 |
| 170173 | 1 | 0 | 0 | 0 | 0 |
| 173174 | 1 | 0 | 0 | 0 | 0 |
| 173175 | 1 | 0 | 0 | 0 | 0 |
| 173176 | 1 | 0 | 0 | 0 | 0 |
| 176177 | 1 | 0 | 0 | 0 | 0 |
| 176178 | 1 | 0 | 0 | 0 | 0 |
| 176179 | 1 | 0 | 0 | 0 | 0 |
| 179180 | 1 | 0 | 0 | 0 | 0 |
| 180181 | 1 | 0 | 0 | 0 | 0 |
| 180187 | 2 | 0 | 0 | 0 | 0 |
| 181182 | 1 | 0 | 0 | 0 | 0 |
| 181183 | 1 | 0 | 0 | 0 | 0 |
| 181184 | 1 | 0 | 0 | 0 | 0 |
| 184185 | 1 | 0 | 0 | 0 | 0 |
| 184186 | 1 | 0 | 0 | 0 | 0 |
| 184204 | 1 | 0 | 0 | 0 | 0 |
| 188189 | 1 | 0 | 0 | 0 | 0 |
| 188190 | 1 | 0 | 0 | 0 | 0 |
| 188197 | 1 | 0 | 0 | 0 | 0 |
| 188198 | 1 | 0 | 0 | 0 | 0 |
| 190191 | 1 | 0 | 0 | 0 | 0 |
| 191192 | 1 | 0 | 0 | 0 | 0 |
| 191193 | 1 | 0 | 0 | 0 | 0 |
| 191194 | 1 | 0 | 0 | 0 | 0 |
| 194195 | 1 | 0 | 0 | 0 | 0 |
| 194196 | 1 | 0 | 0 | 0 | 0 |
| 194197 | 1 | 0 | 0 | 0 | 0 |
| 198199 | 1 | 0 | 0 | 0 | 0 |
| 198200 | 1 | 0 | 0 | 0 | 0 |

|        |   |   |   |   |   |
|--------|---|---|---|---|---|
| 198201 | 1 | 0 | 0 | 0 | 0 |
| 201202 | 1 | 0 | 0 | 0 | 0 |
| 201203 | 1 | 0 | 0 | 0 | 0 |
| 201204 | 1 | 0 | 0 | 0 | 0 |
| 204205 | 1 | 0 | 0 | 0 | 0 |
| 205206 | 1 | 0 | 0 | 0 | 0 |
| 205207 | 1 | 0 | 0 | 0 | 0 |
| 205208 | 1 | 0 | 0 | 0 | 0 |
| 208209 | 1 | 0 | 0 | 0 | 0 |
| 208210 | 1 | 0 | 0 | 0 | 0 |
| 208211 | 1 | 0 | 0 | 0 | 0 |
| 211212 | 1 | 0 | 0 | 0 | 0 |
| 211216 | 2 | 0 | 0 | 0 | 0 |
| 212213 | 1 | 0 | 0 | 0 | 0 |
| 213214 | 1 | 0 | 0 | 0 | 0 |
| 213215 | 1 | 0 | 0 | 0 | 0 |
| 213217 | 1 | 0 | 0 | 0 | 0 |
| 217218 | 1 | 0 | 0 | 0 | 0 |
| 217219 | 1 | 0 | 0 | 0 | 0 |
| 217220 | 1 | 0 | 0 | 0 | 0 |
| 220221 | 1 | 0 | 0 | 0 | 0 |
| 220222 | 1 | 0 | 0 | 0 | 0 |
| 220223 | 1 | 0 | 0 | 0 | 0 |
| 223224 | 1 | 0 | 0 | 0 | 0 |
| 223225 | 1 | 0 | 0 | 0 | 0 |
| 223226 | 1 | 0 | 0 | 0 | 0 |
| 226227 | 1 | 0 | 0 | 0 | 0 |
| 226228 | 1 | 0 | 0 | 0 | 0 |
| 226229 | 1 | 0 | 0 | 0 | 0 |
| 229230 | 1 | 0 | 0 | 0 | 0 |
| 229231 | 1 | 0 | 0 | 0 | 0 |
| 229232 | 1 | 0 | 0 | 0 | 0 |
| 232233 | 1 | 0 | 0 | 0 | 0 |
| 232234 | 1 | 0 | 0 | 0 | 0 |
| 232235 | 1 | 0 | 0 | 0 | 0 |
| 235236 | 1 | 0 | 0 | 0 | 0 |
| 235237 | 1 | 0 | 0 | 0 | 0 |
| 235238 | 1 | 0 | 0 | 0 | 0 |
| 238239 | 1 | 0 | 0 | 0 | 0 |
| 238240 | 1 | 0 | 0 | 0 | 0 |
| 238241 | 1 | 0 | 0 | 0 | 0 |
| 241242 | 1 | 0 | 0 | 0 | 0 |
| 242243 | 1 | 0 | 0 | 0 | 0 |
| 242249 | 2 | 0 | 0 | 0 | 0 |
| 243244 | 1 | 0 | 0 | 0 | 0 |
| 243245 | 1 | 0 | 0 | 0 | 0 |
| 243246 | 1 | 0 | 0 | 0 | 0 |
| 246247 | 1 | 0 | 0 | 0 | 0 |
| 246248 | 1 | 0 | 0 | 0 | 0 |
| 246266 | 1 | 0 | 0 | 0 | 0 |
| 250251 | 1 | 0 | 0 | 0 | 0 |
| 250252 | 1 | 0 | 0 | 0 | 0 |
| 250259 | 1 | 0 | 0 | 0 | 0 |
| 250260 | 1 | 0 | 0 | 0 | 0 |
| 252253 | 1 | 0 | 0 | 0 | 0 |
| 253254 | 1 | 0 | 0 | 0 | 0 |
| 253255 | 1 | 0 | 0 | 0 | 0 |
| 253256 | 1 | 0 | 0 | 0 | 0 |
| 256257 | 1 | 0 | 0 | 0 | 0 |
| 256258 | 1 | 0 | 0 | 0 | 0 |
| 256259 | 1 | 0 | 0 | 0 | 0 |
| 260261 | 1 | 0 | 0 | 0 | 0 |
| 260262 | 1 | 0 | 0 | 0 | 0 |
| 260263 | 1 | 0 | 0 | 0 | 0 |
| 263264 | 1 | 0 | 0 | 0 | 0 |
| 263265 | 1 | 0 | 0 | 0 | 0 |
| 263266 | 1 | 0 | 0 | 0 | 0 |
| 266267 | 1 | 0 | 0 | 0 | 0 |
| 267268 | 1 | 0 | 0 | 0 | 0 |
| 267269 | 1 | 0 | 0 | 0 | 0 |
| 267270 | 1 | 0 | 0 | 0 | 0 |
| 270271 | 1 | 0 | 0 | 0 | 0 |
| 270272 | 1 | 0 | 0 | 0 | 0 |
| 270273 | 1 | 0 | 0 | 0 | 0 |
| 273274 | 1 | 0 | 0 | 0 | 0 |
| 273278 | 2 | 0 | 0 | 0 | 0 |
| 274275 | 1 | 0 | 0 | 0 | 0 |
| 275276 | 1 | 0 | 0 | 0 | 0 |
| 275277 | 1 | 0 | 0 | 0 | 0 |
| 275279 | 1 | 0 | 0 | 0 | 0 |
| 279280 | 1 | 0 | 0 | 0 | 0 |



279281 1 0 0 0 0  
279282 1 0 0 0 0  
282283 1 0 0 0 0  
282284 1 0 0 0 0  
282285 1 0 0 0 0  
285286 1 0 0 0 0  
285287 1 0 0 0 0  
285288 1 0 0 0 0  
288289 1 0 0 0 0  
288290 1 0 0 0 0  
288291 1 0 0 0 0  
291292 1 0 0 0 0  
291293 1 0 0 0 0  
291294 1 0 0 0 0  
294295 1 0 0 0 0  
294296 1 0 0 0 0  
294297 1 0 0 0 0  
297298 1 0 0 0 0  
297299 1 0 0 0 0  
297300 1 0 0 0 0  
300301 1 0 0 0 0  
300302 1 0 0 0 0  
300303 1 0 0 0 0  
303304 1 0 0 0 0  
304305 1 0 0 0 0  
304312 2 0 0 0 0  
305306 1 0 0 0 0  
305307 1 0 0 0 0  
305308 1 0 0 0 0  
308309 1 0 0 0 0  
308310 1 0 0 0 0  
308311 1 0 0 0 0

M END  
> <NAME>  
LL6\_1

\$\$\$\$  
LL8\_1  
MOE2012 3D

337336 0 0 1 0 0 0 0 0999 V2000  
63.1510 -14.5460 -4.5870 C 0 0 0 0 0 0 0 0 0 0 0 0 0 0 0  
63.4800 -13.5080 -4.7230 H 0 0 0 0 0 0 0 0 0 0 0 0 0 0 0  
63.8560 -15.1850 -5.1330 H 0 0 0 0 0 0 0 0 0 0 0 0 0 0 0  
63.1760 -14.9060 -3.0960 C 0 0 0 0 0 0 0 0 0 0 0 0 0 0 0  
62.4660 -14.2680 -2.5590 H 0 0 0 0 0 0 0 0 0 0 0 0 0 0 0  
62.8540 -15.9480 -2.9790 H 0 0 0 0 0 0 0 0 0 0 0 0 0 0 0  
64.5280 -14.7270 -2.5570 N 0 0 3 0 0 0 0 0 0 0 0 0 0 0 0  
65.1830 -15.2420 -3.1480 H 0 0 0 0 0 0 0 0 0 0 0 0 0 0 0  
61.6880 -14.3840 -6.6710 C 0 0 0 0 0 0 0 0 0 0 0 0 0 0 0  
62.1620 -13.4050 -6.8180 H 0 0 0 0 0 0 0 0 0 0 0 0 0 0 0  
60.3410 -14.2490 -7.1360 O 0 0 0 0 0 0 0 0 0 0 0 0 0 0 0  
59.5630 -15.4350 -7.0530 C 0 0 0 0 0 0 0 0 0 0 0 0 0 0 0  
59.3510 -15.6920 -6.0120 H 0 0 0 0 0 0 0 0 0 0 0 0 0 0 0  
60.0540 -16.2720 -7.5590 H 0 0 0 0 0 0 0 0 0 0 0 0 0 0 0  
58.6080 -15.2470 -7.5520 H 0 0 0 0 0 0 0 0 0 0 0 0 0 0 0  
62.6610 -14.9690 -8.7470 C 0 0 0 0 0 0 0 0 0 0 0 0 0 0 0  
63.2490 -14.0470 -8.7780 H 0 0 0 0 0 0 0 0 0 0 0 0 0 0 0  
61.7190 -14.8350 -9.2860 H 0 0 0 0 0 0 0 0 0 0 0 0 0 0 0  
63.2330 -15.7600 -9.2410 H 0 0 0 0 0 0 0 0 0 0 0 0 0 0 0  
62.4260 -15.3660 -7.4020 O 0 0 0 0 0 0 0 0 0 0 0 0 0 0 0  
61.7430 -14.7140 -5.1720 C 0 0 0 0 0 0 0 0 0 0 0 0 0 0 0  
61.4240 -15.7520 -5.0100 H 0 0 0 0 0 0 0 0 0 0 0 0 0 0 0  
61.0350 -14.0750 -4.6300 H 0 0 0 0 0 0 0 0 0 0 0 0 0 0 0  
64.6530 -15.2300 -1.1820 C 0 0 0 0 0 0 0 0 0 0 0 0 0 0 0  
65.7140 -15.4350 -0.9930 H 0 0 0 0 0 0 0 0 0 0 0 0 0 0 0  
64.1440 -16.1970 -1.0910 H 0 0 0 0 0 0 0 0 0 0 0 0 0 0 0  
64.1180 -14.2640 -0.1250 C 0 0 0 0 0 0 0 0 0 0 0 0 0 0 0  
63.1730 -13.8120 -0.4450 H 0 0 0 0 0 0 0 0 0 0 0 0 0 0 0  
63.9220 -14.8220 0.7990 H 0 0 0 0 0 0 0 0 0 0 0 0 0 0 0  
65.1030 -13.1760 0.2310 C 0 0 0 0 0 0 0 0 0 0 0 0 0 0 0  
64.4420 -12.1470 0.8410 O 0 0 0 0 0 0 0 0 0 0 0 0 0 0 0  
65.2840 -11.0760 1.2930 C 0 0 0 0 0 0 0 0 0 0 0 0 0 0 0  
66.0130 -11.4660 2.0120 H 0 0 0 0 0 0 0 0 0 0 0 0 0 0 0  
65.8100 -10.6400 0.4360 H 0 0 0 0 0 0 0 0 0 0 0 0 0 0 0  
66.3160 -13.2310 0.0750 O 0 0 0 0 0 0 0 0 0 0 0 0 0 0 0  
64.3990 -10.0280 1.9580 C 0 0 0 0 0 0 0 0 0 0 0 0 0 0 0  
63.6540 -9.6710 1.2360 H 0 0 0 0 0 0 0 0 0 0 0 0 0 0 0  
63.8290 -10.4980 2.7690 H 0 0 0 0 0 0 0 0 0 0 0 0 0 0 0  
65.2180 -8.8580 2.4980 C 0 0 0 0 0 0 0 0 0 0 0 0 0 0 0  
65.9570 -9.2300 3.2170 H 0 0 0 0 0 0 0 0 0 0 0 0 0 0 0

|         |         |         |   |   |   |   |   |   |   |   |   |   |   |   |
|---------|---------|---------|---|---|---|---|---|---|---|---|---|---|---|---|
| 65.7740 | -8.3870 | 1.6770  | H | 0 | 0 | 0 | 0 | 0 | 0 | 0 | 0 | 0 | 0 | 0 |
| 64.3230 | -7.8180 | 3.1740  | C | 0 | 0 | 0 | 0 | 0 | 0 | 0 | 0 | 0 | 0 | 0 |
| 63.5970 | -7.4300 | 2.4490  | H | 0 | 0 | 0 | 0 | 0 | 0 | 0 | 0 | 0 | 0 | 0 |
| 63.7520 | -8.2940 | 3.9800  | H | 0 | 0 | 0 | 0 | 0 | 0 | 0 | 0 | 0 | 0 | 0 |
| 65.1460 | -6.6620 | 3.7460  | C | 0 | 0 | 0 | 0 | 0 | 0 | 0 | 0 | 0 | 0 | 0 |
| 65.8780 | -7.0540 | 4.4630  | H | 0 | 0 | 0 | 0 | 0 | 0 | 0 | 0 | 0 | 0 | 0 |
| 65.7110 | -6.1770 | 2.9400  | H | 0 | 0 | 0 | 0 | 0 | 0 | 0 | 0 | 0 | 0 | 0 |
| 64.2520 | -5.6320 | 4.4380  | C | 0 | 0 | 0 | 0 | 0 | 0 | 0 | 0 | 0 | 0 | 0 |
| 63.5360 | -5.2220 | 3.7160  | H | 0 | 0 | 0 | 0 | 0 | 0 | 0 | 0 | 0 | 0 | 0 |
| 63.6700 | -6.1230 | 5.2280  | H | 0 | 0 | 0 | 0 | 0 | 0 | 0 | 0 | 0 | 0 | 0 |
| 65.0770 | -4.4960 | 5.0450  | C | 0 | 0 | 0 | 0 | 0 | 0 | 0 | 0 | 0 | 0 | 0 |
| 65.8000 | -4.9080 | 5.7590  | H | 0 | 0 | 0 | 0 | 0 | 0 | 0 | 0 | 0 | 0 | 0 |
| 65.6510 | -3.9950 | 4.2560  | H | 0 | 0 | 0 | 0 | 0 | 0 | 0 | 0 | 0 | 0 | 0 |
| 64.1840 | -3.4790 | 5.7520  | C | 0 | 0 | 0 | 0 | 0 | 0 | 0 | 0 | 0 | 0 | 0 |
| 63.4640 | -3.0510 | 5.0450  | H | 0 | 0 | 0 | 0 | 0 | 0 | 0 | 0 | 0 | 0 | 0 |
| 63.5840 | -3.9730 | 6.5270  | H | 0 | 0 | 0 | 0 | 0 | 0 | 0 | 0 | 0 | 0 | 0 |
| 64.9980 | -2.3580 | 6.3880  | C | 0 | 0 | 0 | 0 | 0 | 0 | 0 | 0 | 0 | 0 | 0 |
| 65.6770 | -2.7650 | 7.1460  | H | 0 | 0 | 0 | 0 | 0 | 0 | 0 | 0 | 0 | 0 | 0 |
| 65.5760 | -1.8290 | 5.6220  | H | 0 | 0 | 0 | 0 | 0 | 0 | 0 | 0 | 0 | 0 | 0 |
| 64.0810 | -1.4470 | 7.0110  | O | 0 | 0 | 0 | 0 | 0 | 0 | 0 | 0 | 0 | 0 | 0 |
| 64.6610 | -0.3600 | 7.5920  | C | 0 | 0 | 0 | 0 | 0 | 0 | 0 | 0 | 0 | 0 | 0 |
| 63.6090 | 0.5250  | 8.2060  | C | 0 | 0 | 0 | 0 | 0 | 0 | 0 | 0 | 0 | 0 | 0 |
| 62.6100 | 0.2380  | 7.8580  | H | 0 | 0 | 0 | 0 | 0 | 0 | 0 | 0 | 0 | 0 | 0 |
| 63.6330 | 0.3290  | 9.2850  | H | 0 | 0 | 0 | 0 | 0 | 0 | 0 | 0 | 0 | 0 | 0 |
| 63.8620 | 2.0130  | 7.9470  | C | 0 | 0 | 0 | 0 | 0 | 0 | 0 | 0 | 0 | 0 | 0 |
| 63.4040 | 2.5350  | 8.7980  | H | 0 | 0 | 0 | 0 | 0 | 0 | 0 | 0 | 0 | 0 | 0 |
| 64.9300 | 2.2610  | 7.9720  | H | 0 | 0 | 0 | 0 | 0 | 0 | 0 | 0 | 0 | 0 | 0 |
| 65.8650 | -0.1440 | 7.6390  | O | 0 | 0 | 0 | 0 | 0 | 0 | 0 | 0 | 0 | 0 | 0 |
| 62.9950 | 1.0600  | 4.7440  | C | 0 | 0 | 0 | 0 | 0 | 0 | 0 | 0 | 0 | 0 | 0 |
| 62.6360 | 0.2760  | 5.4200  | H | 0 | 0 | 0 | 0 | 0 | 0 | 0 | 0 | 0 | 0 | 0 |
| 62.1080 | 1.5950  | 4.3840  | H | 0 | 0 | 0 | 0 | 0 | 0 | 0 | 0 | 0 | 0 | 0 |
| 63.9130 | 2.0350  | 5.4900  | C | 0 | 0 | 0 | 0 | 0 | 0 | 0 | 0 | 0 | 0 | 0 |
| 64.8710 | 1.5560  | 5.7220  | H | 0 | 0 | 0 | 0 | 0 | 0 | 0 | 0 | 0 | 0 | 0 |
| 64.1750 | 2.8560  | 4.8120  | H | 0 | 0 | 0 | 0 | 0 | 0 | 0 | 0 | 0 | 0 | 0 |
| 63.2330 | 2.5170  | 6.7060  | N | 0 | 0 | 3 | 0 | 0 | 0 | 0 | 0 | 0 | 0 | 0 |
| 62.8140 | -0.5950 | 2.8230  | C | 0 | 0 | 0 | 0 | 0 | 0 | 0 | 0 | 0 | 0 | 0 |
| 62.3860 | -1.2800 | 3.5650  | H | 0 | 0 | 0 | 0 | 0 | 0 | 0 | 0 | 0 | 0 | 0 |
| 63.5540 | -1.4080 | 1.9070  | O | 0 | 0 | 0 | 0 | 0 | 0 | 0 | 0 | 0 | 0 | 0 |
| 64.1740 | -0.6850 | 0.8530  | C | 0 | 0 | 0 | 0 | 0 | 0 | 0 | 0 | 0 | 0 | 0 |
| 65.0040 | -0.0810 | 1.2290  | H | 0 | 0 | 0 | 0 | 0 | 0 | 0 | 0 | 0 | 0 | 0 |
| 63.4550 | -0.0580 | 0.3190  | H | 0 | 0 | 0 | 0 | 0 | 0 | 0 | 0 | 0 | 0 | 0 |
| 64.5850 | -1.4110 | 0.1440  | H | 0 | 0 | 0 | 0 | 0 | 0 | 0 | 0 | 0 | 0 | 0 |
| 60.7120 | -0.7400 | 1.7500  | C | 0 | 0 | 0 | 0 | 0 | 0 | 0 | 0 | 0 | 0 | 0 |
| 60.2660 | -1.2700 | 2.5980  | H | 0 | 0 | 0 | 0 | 0 | 0 | 0 | 0 | 0 | 0 | 0 |
| 61.0860 | -1.4550 | 1.0120  | H | 0 | 0 | 0 | 0 | 0 | 0 | 0 | 0 | 0 | 0 | 0 |
| 59.9370 | -0.1300 | 1.2790  | H | 0 | 0 | 0 | 0 | 0 | 0 | 0 | 0 | 0 | 0 | 0 |
| 61.7500 | 0.1240  | 2.1930  | O | 0 | 0 | 0 | 0 | 0 | 0 | 0 | 0 | 0 | 0 | 0 |
| 63.7170 | 0.4030  | 3.5640  | C | 0 | 0 | 0 | 0 | 0 | 0 | 0 | 0 | 0 | 0 | 0 |
| 64.0440 | 1.1940  | 2.8770  | H | 0 | 0 | 0 | 0 | 0 | 0 | 0 | 0 | 0 | 0 | 0 |
| 64.6200 | -0.1120 | 3.9130  | H | 0 | 0 | 0 | 0 | 0 | 0 | 0 | 0 | 0 | 0 | 0 |
| 63.1340 | 3.9900  | 6.7490  | C | 0 | 0 | 0 | 0 | 0 | 0 | 0 | 0 | 0 | 0 | 0 |
| 64.1310 | 4.4410  | 6.6580  | H | 0 | 0 | 0 | 0 | 0 | 0 | 0 | 0 | 0 | 0 | 0 |
| 62.7410 | 4.2990  | 7.7260  | H | 0 | 0 | 0 | 0 | 0 | 0 | 0 | 0 | 0 | 0 | 0 |
| 62.2040 | 4.5830  | 5.6890  | C | 0 | 0 | 0 | 0 | 0 | 0 | 0 | 0 | 0 | 0 | 0 |
| 62.1540 | 5.6720  | 5.8050  | H | 0 | 0 | 0 | 0 | 0 | 0 | 0 | 0 | 0 | 0 | 0 |
| 62.5860 | 4.3860  | 4.6820  | H | 0 | 0 | 0 | 0 | 0 | 0 | 0 | 0 | 0 | 0 | 0 |
| 60.7990 | 4.0510  | 5.8150  | C | 0 | 0 | 0 | 0 | 0 | 0 | 0 | 0 | 0 | 0 | 0 |
| 60.2900 | 3.7990  | 4.5740  | O | 0 | 0 | 0 | 0 | 0 | 0 | 0 | 0 | 0 | 0 | 0 |
| 58.9770 | 3.2280  | 4.5740  | C | 0 | 0 | 0 | 0 | 0 | 0 | 0 | 0 | 0 | 0 | 0 |
| 58.9740 | 2.3160  | 5.1820  | H | 0 | 0 | 0 | 0 | 0 | 0 | 0 | 0 | 0 | 0 | 0 |
| 58.2670 | 3.9510  | 4.9920  | H | 0 | 0 | 0 | 0 | 0 | 0 | 0 | 0 | 0 | 0 | 0 |
| 60.1950 | 3.9000  | 6.8700  | O | 0 | 0 | 0 | 0 | 0 | 0 | 0 | 0 | 0 | 0 | 0 |
| 58.6030 | 2.8950  | 3.1330  | C | 0 | 0 | 0 | 0 | 0 | 0 | 0 | 0 | 0 | 0 | 0 |
| 58.6200 | 3.8130  | 2.5320  | H | 0 | 0 | 0 | 0 | 0 | 0 | 0 | 0 | 0 | 0 | 0 |
| 59.3690 | 2.2390  | 2.7010  | H | 0 | 0 | 0 | 0 | 0 | 0 | 0 | 0 | 0 | 0 | 0 |
| 57.2310 | 2.2310  | 3.0550  | C | 0 | 0 | 0 | 0 | 0 | 0 | 0 | 0 | 0 | 0 | 0 |
| 57.2390 | 1.3060  | 3.6450  | H | 0 | 0 | 0 | 0 | 0 | 0 | 0 | 0 | 0 | 0 | 0 |
| 56.4780 | 2.8910  | 3.5010  | H | 0 | 0 | 0 | 0 | 0 | 0 | 0 | 0 | 0 | 0 | 0 |
| 56.8390 | 1.9120  | 1.6110  | C | 0 | 0 | 0 | 0 | 0 | 0 | 0 | 0 | 0 | 0 | 0 |
| 56.8190 | 2.8380  | 1.0240  | H | 0 | 0 | 0 | 0 | 0 | 0 | 0 | 0 | 0 | 0 | 0 |
| 57.5940 | 1.2580  | 1.1580  | H | 0 | 0 | 0 | 0 | 0 | 0 | 0 | 0 | 0 | 0 | 0 |
| 55.4700 | 1.2320  | 1.5530  | C | 0 | 0 | 0 | 0 | 0 | 0 | 0 | 0 | 0 | 0 | 0 |
| 55.5030 | 0.2910  | 2.1140  | H | 0 | 0 | 0 | 0 | 0 | 0 | 0 | 0 | 0 | 0 | 0 |
| 54.7250 | 1.8730  | 2.0420  | H | 0 | 0 | 0 | 0 | 0 | 0 | 0 | 0 | 0 | 0 | 0 |
| 55.0360 | 0.9560  | 0.1130  | C | 0 | 0 | 0 | 0 | 0 | 0 | 0 | 0 | 0 | 0 | 0 |
| 55.0170 | 1.8970  | -0.4480 | H | 0 | 0 | 0 | 0 | 0 | 0 | 0 | 0 | 0 | 0 | 0 |
| 55.7680 | 0.3030  | -0.3780 | H | 0 | 0 | 0 | 0 | 0 | 0 | 0 | 0 | 0 | 0 | 0 |
| 53.6540 | 0.3000  | 0.0710  | C | 0 | 0 | 0 | 0 | 0 | 0 | 0 | 0 | 0 | 0 | 0 |
| 53.6980 | -0.6820 | 0.5560  | H | 0 | 0 | 0 | 0 | 0 | 0 | 0 | 0 | 0 | 0 | 0 |
| 52.9450 | 0.9100  | 0.6440  | H | 0 | 0 | 0 | 0 | 0 | 0 | 0 | 0 | 0 | 0 | 0 |
| 53.1430 | 0.1470  | -1.3600 | C | 0 | 0 | 0 | 0 | 0 | 0 | 0 | 0 | 0 | 0 | 0 |

|         |         |         |   |   |   |   |   |   |   |   |   |   |   |   |   |
|---------|---------|---------|---|---|---|---|---|---|---|---|---|---|---|---|---|
| 53.1220 | 1.1230  | -1.8590 | H | 0 | 0 | 0 | 0 | 0 | 0 | 0 | 0 | 0 | 0 | 0 | 0 |
| 53.8300 | -0.4730 | -1.9480 | H | 0 | 0 | 0 | 0 | 0 | 0 | 0 | 0 | 0 | 0 | 0 | 0 |
| 51.7490 | -0.4730 | -1.3940 | C | 0 | 0 | 0 | 0 | 0 | 0 | 0 | 0 | 0 | 0 | 0 | 0 |
| 51.7980 | -1.5270 | -1.0990 | H | 0 | 0 | 0 | 0 | 0 | 0 | 0 | 0 | 0 | 0 | 0 | 0 |
| 51.0790 | 0.0670  | -0.7140 | H | 0 | 0 | 0 | 0 | 0 | 0 | 0 | 0 | 0 | 0 | 0 | 0 |
| 51.2420 | -0.3660 | -2.7310 | O | 0 | 0 | 0 | 0 | 0 | 0 | 0 | 0 | 0 | 0 | 0 | 0 |
| 49.9700 | -0.8250 | -2.8930 | C | 0 | 0 | 0 | 0 | 0 | 0 | 0 | 0 | 0 | 0 | 0 | 0 |
| 49.4690 | -0.5020 | -4.2750 | C | 0 | 0 | 0 | 0 | 0 | 0 | 0 | 0 | 0 | 0 | 0 | 0 |
| 50.2160 | 0.0630  | -4.8400 | H | 0 | 0 | 0 | 0 | 0 | 0 | 0 | 0 | 0 | 0 | 0 | 0 |
| 49.3630 | -1.4580 | -4.8010 | H | 0 | 0 | 0 | 0 | 0 | 0 | 0 | 0 | 0 | 0 | 0 | 0 |
| 48.1240 | 0.2260  | -4.2630 | C | 0 | 0 | 0 | 0 | 0 | 0 | 0 | 0 | 0 | 0 | 0 | 0 |
| 47.7780 | 0.2740  | -5.3050 | H | 0 | 0 | 0 | 0 | 0 | 0 | 0 | 0 | 0 | 0 | 0 | 0 |
| 47.3790 | -0.4140 | -3.7770 | H | 0 | 0 | 0 | 0 | 0 | 0 | 0 | 0 | 0 | 0 | 0 | 0 |
| 49.3150 | -1.4110 | -2.0410 | O | 0 | 0 | 0 | 0 | 0 | 0 | 0 | 0 | 0 | 0 | 0 | 0 |
| 46.8350 | 1.0500  | -1.5840 | C | 0 | 0 | 0 | 0 | 0 | 0 | 0 | 0 | 0 | 0 | 0 | 0 |
| 45.9010 | 1.3880  | -2.0500 | H | 0 | 0 | 0 | 0 | 0 | 0 | 0 | 0 | 0 | 0 | 0 | 0 |
| 46.8900 | -0.0360 | -1.7110 | H | 0 | 0 | 0 | 0 | 0 | 0 | 0 | 0 | 0 | 0 | 0 | 0 |
| 48.0260 | 1.7390  | -2.2670 | C | 0 | 0 | 0 | 0 | 0 | 0 | 0 | 0 | 0 | 0 | 0 | 0 |
| 47.9440 | 2.8070  | -2.0280 | H | 0 | 0 | 0 | 0 | 0 | 0 | 0 | 0 | 0 | 0 | 0 | 0 |
| 48.9610 | 1.3900  | -1.8200 | H | 0 | 0 | 0 | 0 | 0 | 0 | 0 | 0 | 0 | 0 | 0 | 0 |
| 48.0410 | 1.5850  | -3.7200 | N | 0 | 0 | 3 | 0 | 0 | 0 | 0 | 0 | 0 | 0 | 0 | 0 |
| 45.5760 | 0.7670  | 0.6130  | C | 0 | 0 | 0 | 0 | 0 | 0 | 0 | 0 | 0 | 0 | 0 | 0 |
| 44.6850 | 1.0860  | 0.0590  | H | 0 | 0 | 0 | 0 | 0 | 0 | 0 | 0 | 0 | 0 | 0 | 0 |
| 45.4190 | 1.2700  | 1.9440  | O | 0 | 0 | 0 | 0 | 0 | 0 | 0 | 0 | 0 | 0 | 0 | 0 |
| 46.4790 | 0.9390  | 2.8300  | C | 0 | 0 | 0 | 0 | 0 | 0 | 0 | 0 | 0 | 0 | 0 | 0 |
| 47.3900 | 1.4870  | 2.5700  | H | 0 | 0 | 0 | 0 | 0 | 0 | 0 | 0 | 0 | 0 | 0 | 0 |
| 46.6720 | -0.1370 | 2.8420  | H | 0 | 0 | 0 | 0 | 0 | 0 | 0 | 0 | 0 | 0 | 0 | 0 |
| 46.1830 | 1.2440  | 3.8380  | H | 0 | 0 | 0 | 0 | 0 | 0 | 0 | 0 | 0 | 0 | 0 | 0 |
| 44.4290 | -1.2780 | 0.9180  | C | 0 | 0 | 0 | 0 | 0 | 0 | 0 | 0 | 0 | 0 | 0 | 0 |
| 43.6390 | -0.9890 | 0.2180  | H | 0 | 0 | 0 | 0 | 0 | 0 | 0 | 0 | 0 | 0 | 0 | 0 |
| 44.1390 | -1.0210 | 1.9410  | H | 0 | 0 | 0 | 0 | 0 | 0 | 0 | 0 | 0 | 0 | 0 | 0 |
| 44.5630 | -2.3610 | 0.8590  | H | 0 | 0 | 0 | 0 | 0 | 0 | 0 | 0 | 0 | 0 | 0 | 0 |
| 45.6590 | -0.6580 | 0.5680  | O | 0 | 0 | 0 | 0 | 0 | 0 | 0 | 0 | 0 | 0 | 0 | 0 |
| 46.8030 | 1.3730  | -0.0850 | C | 0 | 0 | 0 | 0 | 0 | 0 | 0 | 0 | 0 | 0 | 0 | 0 |
| 47.7230 | 0.9820  | 0.3680  | H | 0 | 0 | 0 | 0 | 0 | 0 | 0 | 0 | 0 | 0 | 0 | 0 |
| 46.8080 | 2.4590  | 0.0700  | H | 0 | 0 | 0 | 0 | 0 | 0 | 0 | 0 | 0 | 0 | 0 | 0 |
| 48.7730 | 2.6250  | -4.4530 | C | 0 | 0 | 0 | 0 | 0 | 0 | 0 | 0 | 0 | 0 | 0 | 0 |
| 48.2160 | 3.5640  | -4.3350 | H | 0 | 0 | 0 | 0 | 0 | 0 | 0 | 0 | 0 | 0 | 0 | 0 |
| 48.7100 | 2.4020  | -5.5270 | H | 0 | 0 | 0 | 0 | 0 | 0 | 0 | 0 | 0 | 0 | 0 | 0 |
| 50.2420 | 2.8750  | -4.1090 | C | 0 | 0 | 0 | 0 | 0 | 0 | 0 | 0 | 0 | 0 | 0 | 0 |
| 50.8090 | 1.9480  | -4.0100 | H | 0 | 0 | 0 | 0 | 0 | 0 | 0 | 0 | 0 | 0 | 0 | 0 |
| 50.7200 | 3.4220  | -4.9310 | H | 0 | 0 | 0 | 0 | 0 | 0 | 0 | 0 | 0 | 0 | 0 | 0 |
| 50.4270 | 3.7240  | -2.8780 | C | 0 | 0 | 0 | 0 | 0 | 0 | 0 | 0 | 0 | 0 | 0 | 0 |
| 51.0880 | 3.0160  | -1.9230 | O | 0 | 0 | 0 | 0 | 0 | 0 | 0 | 0 | 0 | 0 | 0 | 0 |
| 51.4040 | 3.6970  | -0.6980 | C | 0 | 0 | 0 | 0 | 0 | 0 | 0 | 0 | 0 | 0 | 0 | 0 |
| 50.6350 | 4.4330  | -0.4360 | H | 0 | 0 | 0 | 0 | 0 | 0 | 0 | 0 | 0 | 0 | 0 | 0 |
| 51.4060 | 2.9370  | 0.0890  | H | 0 | 0 | 0 | 0 | 0 | 0 | 0 | 0 | 0 | 0 | 0 | 0 |
| 50.0380 | 4.8780  | -2.7710 | O | 0 | 0 | 0 | 0 | 0 | 0 | 0 | 0 | 0 | 0 | 0 | 0 |
| 52.7820 | 4.3370  | -0.8260 | C | 0 | 0 | 0 | 0 | 0 | 0 | 0 | 0 | 0 | 0 | 0 | 0 |
| 53.4790 | 3.6130  | -1.2650 | H | 0 | 0 | 0 | 0 | 0 | 0 | 0 | 0 | 0 | 0 | 0 | 0 |
| 52.7310 | 5.1690  | -1.5390 | H | 0 | 0 | 0 | 0 | 0 | 0 | 0 | 0 | 0 | 0 | 0 | 0 |
| 53.3150 | 4.8250  | 0.5190  | C | 0 | 0 | 0 | 0 | 0 | 0 | 0 | 0 | 0 | 0 | 0 | 0 |
| 52.6280 | 5.5680  | 0.9420  | H | 0 | 0 | 0 | 0 | 0 | 0 | 0 | 0 | 0 | 0 | 0 | 0 |
| 53.3600 | 3.9860  | 1.2230  | H | 0 | 0 | 0 | 0 | 0 | 0 | 0 | 0 | 0 | 0 | 0 | 0 |
| 54.7080 | 5.4380  | 0.3640  | C | 0 | 0 | 0 | 0 | 0 | 0 | 0 | 0 | 0 | 0 | 0 | 0 |
| 55.3810 | 4.7090  | -0.1030 | H | 0 | 0 | 0 | 0 | 0 | 0 | 0 | 0 | 0 | 0 | 0 | 0 |
| 54.6510 | 6.3010  | -0.3110 | H | 0 | 0 | 0 | 0 | 0 | 0 | 0 | 0 | 0 | 0 | 0 | 0 |
| 55.2890 | 5.8760  | 1.7100  | C | 0 | 0 | 0 | 0 | 0 | 0 | 0 | 0 | 0 | 0 | 0 | 0 |
| 54.6050 | 6.5830  | 2.1940  | H | 0 | 0 | 0 | 0 | 0 | 0 | 0 | 0 | 0 | 0 | 0 | 0 |
| 55.3820 | 5.0070  | 2.3730  | H | 0 | 0 | 0 | 0 | 0 | 0 | 0 | 0 | 0 | 0 | 0 | 0 |
| 56.6590 | 6.5330  | 1.5250  | C | 0 | 0 | 0 | 0 | 0 | 0 | 0 | 0 | 0 | 0 | 0 | 0 |
| 57.3440 | 5.8280  | 1.0380  | H | 0 | 0 | 0 | 0 | 0 | 0 | 0 | 0 | 0 | 0 | 0 | 0 |
| 56.5570 | 7.3960  | 0.8550  | H | 0 | 0 | 0 | 0 | 0 | 0 | 0 | 0 | 0 | 0 | 0 | 0 |
| 57.2570 | 6.9880  | 2.8570  | C | 0 | 0 | 0 | 0 | 0 | 0 | 0 | 0 | 0 | 0 | 0 | 0 |
| 56.5440 | 7.6370  | 3.3790  | H | 0 | 0 | 0 | 0 | 0 | 0 | 0 | 0 | 0 | 0 | 0 | 0 |
| 57.4350 | 6.1180  | 3.5000  | H | 0 | 0 | 0 | 0 | 0 | 0 | 0 | 0 | 0 | 0 | 0 | 0 |
| 58.5650 | 7.7460  | 2.6340  | C | 0 | 0 | 0 | 0 | 0 | 0 | 0 | 0 | 0 | 0 | 0 | 0 |
| 59.2810 | 7.1080  | 2.1010  | H | 0 | 0 | 0 | 0 | 0 | 0 | 0 | 0 | 0 | 0 | 0 | 0 |
| 58.3900 | 8.6090  | 1.9790  | H | 0 | 0 | 0 | 0 | 0 | 0 | 0 | 0 | 0 | 0 | 0 | 0 |
| 59.1850 | 8.2270  | 3.9420  | C | 0 | 0 | 0 | 0 | 0 | 0 | 0 | 0 | 0 | 0 | 0 | 0 |
| 58.4600 | 8.8200  | 4.5100  | H | 0 | 0 | 0 | 0 | 0 | 0 | 0 | 0 | 0 | 0 | 0 | 0 |
| 59.4930 | 7.3910  | 4.5810  | H | 0 | 0 | 0 | 0 | 0 | 0 | 0 | 0 | 0 | 0 | 0 | 0 |
| 60.2940 | 9.0980  | 3.6550  | O | 0 | 0 | 0 | 0 | 0 | 0 | 0 | 0 | 0 | 0 | 0 | 0 |
| 61.4950 | 8.4990  | 3.4260  | C | 0 | 0 | 0 | 0 | 0 | 0 | 0 | 0 | 0 | 0 | 0 | 0 |
| 62.5310 | 9.5250  | 3.0510  | C | 0 | 0 | 0 | 0 | 0 | 0 | 0 | 0 | 0 | 0 | 0 | 0 |
| 62.0700 | 10.5140 | 2.9730  | H | 0 | 0 | 0 | 0 | 0 | 0 | 0 | 0 | 0 | 0 | 0 | 0 |
| 63.2320 | 9.5780  | 3.8930  | H | 0 | 0 | 0 | 0 | 0 | 0 | 0 | 0 | 0 | 0 | 0 | 0 |
| 63.2880 | 9.1430  | 1.7720  | C | 0 | 0 | 0 | 0 | 0 | 0 | 0 | 0 | 0 | 0 | 0 | 0 |
| 64.3010 | 9.5600  | 1.8430  | H | 0 | 0 | 0 | 0 | 0 | 0 | 0 | 0 | 0 | 0 | 0 | 0 |
| 63.4400 | 8.0570  | 1.7270  | H | 0 | 0 | 0 | 0 | 0 | 0 | 0 | 0 | 0 | 0 | 0 | 0 |
| 61.7160 | 7.2980  | 3.5150  | O | 0 | 0 | 0 | 0 | 0 | 0 | 0 | 0 | 0 | 0 | 0 | 0 |





|     |     |   |   |   |   |   |
|-----|-----|---|---|---|---|---|
| 27  | 29  | 1 | 0 | 0 | 0 | 0 |
| 27  | 30  | 1 | 0 | 0 | 0 | 0 |
| 30  | 31  | 1 | 0 | 0 | 0 | 0 |
| 30  | 35  | 2 | 0 | 0 | 0 | 0 |
| 31  | 32  | 1 | 0 | 0 | 0 | 0 |
| 32  | 33  | 1 | 0 | 0 | 0 | 0 |
| 32  | 34  | 1 | 0 | 0 | 0 | 0 |
| 32  | 36  | 1 | 0 | 0 | 0 | 0 |
| 36  | 37  | 1 | 0 | 0 | 0 | 0 |
| 36  | 38  | 1 | 0 | 0 | 0 | 0 |
| 36  | 39  | 1 | 0 | 0 | 0 | 0 |
| 39  | 40  | 1 | 0 | 0 | 0 | 0 |
| 39  | 41  | 1 | 0 | 0 | 0 | 0 |
| 39  | 42  | 1 | 0 | 0 | 0 | 0 |
| 42  | 43  | 1 | 0 | 0 | 0 | 0 |
| 42  | 44  | 1 | 0 | 0 | 0 | 0 |
| 42  | 45  | 1 | 0 | 0 | 0 | 0 |
| 45  | 46  | 1 | 0 | 0 | 0 | 0 |
| 45  | 47  | 1 | 0 | 0 | 0 | 0 |
| 45  | 48  | 1 | 0 | 0 | 0 | 0 |
| 48  | 49  | 1 | 0 | 0 | 0 | 0 |
| 48  | 50  | 1 | 0 | 0 | 0 | 0 |
| 48  | 51  | 1 | 0 | 0 | 0 | 0 |
| 51  | 52  | 1 | 0 | 0 | 0 | 0 |
| 51  | 53  | 1 | 0 | 0 | 0 | 0 |
| 51  | 54  | 1 | 0 | 0 | 0 | 0 |
| 54  | 55  | 1 | 0 | 0 | 0 | 0 |
| 54  | 56  | 1 | 0 | 0 | 0 | 0 |
| 54  | 57  | 1 | 0 | 0 | 0 | 0 |
| 57  | 58  | 1 | 0 | 0 | 0 | 0 |
| 57  | 59  | 1 | 0 | 0 | 0 | 0 |
| 57  | 60  | 1 | 0 | 0 | 0 | 0 |
| 60  | 61  | 1 | 0 | 0 | 0 | 0 |
| 61  | 62  | 1 | 0 | 0 | 0 | 0 |
| 61  | 68  | 2 | 0 | 0 | 0 | 0 |
| 62  | 63  | 1 | 0 | 0 | 0 | 0 |
| 62  | 64  | 1 | 0 | 0 | 0 | 0 |
| 62  | 65  | 1 | 0 | 0 | 0 | 0 |
| 65  | 66  | 1 | 0 | 0 | 0 | 0 |
| 65  | 67  | 1 | 0 | 0 | 0 | 0 |
| 65  | 75  | 1 | 0 | 0 | 0 | 0 |
| 69  | 70  | 1 | 0 | 0 | 0 | 0 |
| 69  | 71  | 1 | 0 | 0 | 0 | 0 |
| 69  | 72  | 1 | 0 | 0 | 0 | 0 |
| 69  | 88  | 1 | 0 | 0 | 0 | 0 |
| 72  | 73  | 1 | 0 | 0 | 0 | 0 |
| 72  | 74  | 1 | 0 | 0 | 0 | 0 |
| 72  | 75  | 1 | 0 | 0 | 0 | 0 |
| 75  | 91  | 1 | 0 | 0 | 0 | 0 |
| 76  | 77  | 1 | 0 | 0 | 0 | 0 |
| 76  | 78  | 1 | 0 | 0 | 0 | 0 |
| 76  | 87  | 1 | 0 | 0 | 0 | 0 |
| 76  | 88  | 1 | 0 | 0 | 0 | 0 |
| 78  | 79  | 1 | 0 | 0 | 0 | 0 |
| 79  | 80  | 1 | 0 | 0 | 0 | 0 |
| 79  | 81  | 1 | 0 | 0 | 0 | 0 |
| 79  | 82  | 1 | 0 | 0 | 0 | 0 |
| 83  | 84  | 1 | 0 | 0 | 0 | 0 |
| 83  | 85  | 1 | 0 | 0 | 0 | 0 |
| 83  | 86  | 1 | 0 | 0 | 0 | 0 |
| 83  | 87  | 1 | 0 | 0 | 0 | 0 |
| 88  | 89  | 1 | 0 | 0 | 0 | 0 |
| 88  | 90  | 1 | 0 | 0 | 0 | 0 |
| 91  | 92  | 1 | 0 | 0 | 0 | 0 |
| 91  | 93  | 1 | 0 | 0 | 0 | 0 |
| 91  | 94  | 1 | 0 | 0 | 0 | 0 |
| 94  | 95  | 1 | 0 | 0 | 0 | 0 |
| 94  | 96  | 1 | 0 | 0 | 0 | 0 |
| 94  | 97  | 1 | 0 | 0 | 0 | 0 |
| 97  | 98  | 1 | 0 | 0 | 0 | 0 |
| 97  | 102 | 2 | 0 | 0 | 0 | 0 |
| 98  | 99  | 1 | 0 | 0 | 0 | 0 |
| 99  | 100 | 1 | 0 | 0 | 0 | 0 |
| 99  | 101 | 1 | 0 | 0 | 0 | 0 |
| 99  | 103 | 1 | 0 | 0 | 0 | 0 |
| 103 | 104 | 1 | 0 | 0 | 0 | 0 |
| 103 | 105 | 1 | 0 | 0 | 0 | 0 |
| 103 | 106 | 1 | 0 | 0 | 0 | 0 |
| 106 | 107 | 1 | 0 | 0 | 0 | 0 |
| 106 | 108 | 1 | 0 | 0 | 0 | 0 |
| 106 | 109 | 1 | 0 | 0 | 0 | 0 |

|        |   |   |   |   |   |
|--------|---|---|---|---|---|
| 109110 | 1 | 0 | 0 | 0 | 0 |
| 109111 | 1 | 0 | 0 | 0 | 0 |
| 109112 | 1 | 0 | 0 | 0 | 0 |
| 112113 | 1 | 0 | 0 | 0 | 0 |
| 112114 | 1 | 0 | 0 | 0 | 0 |
| 112115 | 1 | 0 | 0 | 0 | 0 |
| 115116 | 1 | 0 | 0 | 0 | 0 |
| 115117 | 1 | 0 | 0 | 0 | 0 |
| 115118 | 1 | 0 | 0 | 0 | 0 |
| 118119 | 1 | 0 | 0 | 0 | 0 |
| 118120 | 1 | 0 | 0 | 0 | 0 |
| 118121 | 1 | 0 | 0 | 0 | 0 |
| 121122 | 1 | 0 | 0 | 0 | 0 |
| 121123 | 1 | 0 | 0 | 0 | 0 |
| 121124 | 1 | 0 | 0 | 0 | 0 |
| 124125 | 1 | 0 | 0 | 0 | 0 |
| 124126 | 1 | 0 | 0 | 0 | 0 |
| 124127 | 1 | 0 | 0 | 0 | 0 |
| 127128 | 1 | 0 | 0 | 0 | 0 |
| 128129 | 1 | 0 | 0 | 0 | 0 |
| 128135 | 2 | 0 | 0 | 0 | 0 |
| 129130 | 1 | 0 | 0 | 0 | 0 |
| 129131 | 1 | 0 | 0 | 0 | 0 |
| 129132 | 1 | 0 | 0 | 0 | 0 |
| 132133 | 1 | 0 | 0 | 0 | 0 |
| 132134 | 1 | 0 | 0 | 0 | 0 |
| 132142 | 1 | 0 | 0 | 0 | 0 |
| 136137 | 1 | 0 | 0 | 0 | 0 |
| 136138 | 1 | 0 | 0 | 0 | 0 |
| 136139 | 1 | 0 | 0 | 0 | 0 |
| 136155 | 1 | 0 | 0 | 0 | 0 |
| 139140 | 1 | 0 | 0 | 0 | 0 |
| 139141 | 1 | 0 | 0 | 0 | 0 |
| 139142 | 1 | 0 | 0 | 0 | 0 |
| 142158 | 1 | 0 | 0 | 0 | 0 |
| 143144 | 1 | 0 | 0 | 0 | 0 |
| 143145 | 1 | 0 | 0 | 0 | 0 |
| 143154 | 1 | 0 | 0 | 0 | 0 |
| 143155 | 1 | 0 | 0 | 0 | 0 |
| 145146 | 1 | 0 | 0 | 0 | 0 |
| 146147 | 1 | 0 | 0 | 0 | 0 |
| 146148 | 1 | 0 | 0 | 0 | 0 |
| 146149 | 1 | 0 | 0 | 0 | 0 |
| 150151 | 1 | 0 | 0 | 0 | 0 |
| 150152 | 1 | 0 | 0 | 0 | 0 |
| 150153 | 1 | 0 | 0 | 0 | 0 |
| 150154 | 1 | 0 | 0 | 0 | 0 |
| 155156 | 1 | 0 | 0 | 0 | 0 |
| 155157 | 1 | 0 | 0 | 0 | 0 |
| 158159 | 1 | 0 | 0 | 0 | 0 |
| 158160 | 1 | 0 | 0 | 0 | 0 |
| 158161 | 1 | 0 | 0 | 0 | 0 |
| 161162 | 1 | 0 | 0 | 0 | 0 |
| 161163 | 1 | 0 | 0 | 0 | 0 |
| 161164 | 1 | 0 | 0 | 0 | 0 |
| 164165 | 1 | 0 | 0 | 0 | 0 |
| 164169 | 2 | 0 | 0 | 0 | 0 |
| 165166 | 1 | 0 | 0 | 0 | 0 |
| 166167 | 1 | 0 | 0 | 0 | 0 |
| 166168 | 1 | 0 | 0 | 0 | 0 |
| 166170 | 1 | 0 | 0 | 0 | 0 |
| 170171 | 1 | 0 | 0 | 0 | 0 |
| 170172 | 1 | 0 | 0 | 0 | 0 |
| 170173 | 1 | 0 | 0 | 0 | 0 |
| 173174 | 1 | 0 | 0 | 0 | 0 |
| 173175 | 1 | 0 | 0 | 0 | 0 |
| 173176 | 1 | 0 | 0 | 0 | 0 |
| 176177 | 1 | 0 | 0 | 0 | 0 |
| 176178 | 1 | 0 | 0 | 0 | 0 |
| 176179 | 1 | 0 | 0 | 0 | 0 |
| 179180 | 1 | 0 | 0 | 0 | 0 |
| 179181 | 1 | 0 | 0 | 0 | 0 |
| 179182 | 1 | 0 | 0 | 0 | 0 |
| 182183 | 1 | 0 | 0 | 0 | 0 |
| 182184 | 1 | 0 | 0 | 0 | 0 |
| 182185 | 1 | 0 | 0 | 0 | 0 |
| 185186 | 1 | 0 | 0 | 0 | 0 |
| 185187 | 1 | 0 | 0 | 0 | 0 |
| 185188 | 1 | 0 | 0 | 0 | 0 |
| 188189 | 1 | 0 | 0 | 0 | 0 |
| 188190 | 1 | 0 | 0 | 0 | 0 |

|        |   |   |   |   |   |
|--------|---|---|---|---|---|
| 188191 | 1 | 0 | 0 | 0 | 0 |
| 191192 | 1 | 0 | 0 | 0 | 0 |
| 191193 | 1 | 0 | 0 | 0 | 0 |
| 191194 | 1 | 0 | 0 | 0 | 0 |
| 194195 | 1 | 0 | 0 | 0 | 0 |
| 195196 | 1 | 0 | 0 | 0 | 0 |
| 195202 | 2 | 0 | 0 | 0 | 0 |
| 196197 | 1 | 0 | 0 | 0 | 0 |
| 196198 | 1 | 0 | 0 | 0 | 0 |
| 196199 | 1 | 0 | 0 | 0 | 0 |
| 199200 | 1 | 0 | 0 | 0 | 0 |
| 199201 | 1 | 0 | 0 | 0 | 0 |
| 199209 | 1 | 0 | 0 | 0 | 0 |
| 203204 | 1 | 0 | 0 | 0 | 0 |
| 203205 | 1 | 0 | 0 | 0 | 0 |
| 203206 | 1 | 0 | 0 | 0 | 0 |
| 203222 | 1 | 0 | 0 | 0 | 0 |
| 206207 | 1 | 0 | 0 | 0 | 0 |
| 206208 | 1 | 0 | 0 | 0 | 0 |
| 206209 | 1 | 0 | 0 | 0 | 0 |
| 209225 | 1 | 0 | 0 | 0 | 0 |
| 210211 | 1 | 0 | 0 | 0 | 0 |
| 210212 | 1 | 0 | 0 | 0 | 0 |
| 210221 | 1 | 0 | 0 | 0 | 0 |
| 210222 | 1 | 0 | 0 | 0 | 0 |
| 212213 | 1 | 0 | 0 | 0 | 0 |
| 213214 | 1 | 0 | 0 | 0 | 0 |
| 213215 | 1 | 0 | 0 | 0 | 0 |
| 213216 | 1 | 0 | 0 | 0 | 0 |
| 217218 | 1 | 0 | 0 | 0 | 0 |
| 217219 | 1 | 0 | 0 | 0 | 0 |
| 217220 | 1 | 0 | 0 | 0 | 0 |
| 217221 | 1 | 0 | 0 | 0 | 0 |
| 222223 | 1 | 0 | 0 | 0 | 0 |
| 222224 | 1 | 0 | 0 | 0 | 0 |
| 225226 | 1 | 0 | 0 | 0 | 0 |
| 225227 | 1 | 0 | 0 | 0 | 0 |
| 225228 | 1 | 0 | 0 | 0 | 0 |
| 228229 | 1 | 0 | 0 | 0 | 0 |
| 228230 | 1 | 0 | 0 | 0 | 0 |
| 228231 | 1 | 0 | 0 | 0 | 0 |
| 231232 | 1 | 0 | 0 | 0 | 0 |
| 231236 | 2 | 0 | 0 | 0 | 0 |
| 232233 | 1 | 0 | 0 | 0 | 0 |
| 233234 | 1 | 0 | 0 | 0 | 0 |
| 233235 | 1 | 0 | 0 | 0 | 0 |
| 233237 | 1 | 0 | 0 | 0 | 0 |
| 237238 | 1 | 0 | 0 | 0 | 0 |
| 237239 | 1 | 0 | 0 | 0 | 0 |
| 237240 | 1 | 0 | 0 | 0 | 0 |
| 240241 | 1 | 0 | 0 | 0 | 0 |
| 240242 | 1 | 0 | 0 | 0 | 0 |
| 240243 | 1 | 0 | 0 | 0 | 0 |
| 243244 | 1 | 0 | 0 | 0 | 0 |
| 243245 | 1 | 0 | 0 | 0 | 0 |
| 243246 | 1 | 0 | 0 | 0 | 0 |
| 246247 | 1 | 0 | 0 | 0 | 0 |
| 246248 | 1 | 0 | 0 | 0 | 0 |
| 246249 | 1 | 0 | 0 | 0 | 0 |
| 249250 | 1 | 0 | 0 | 0 | 0 |
| 249251 | 1 | 0 | 0 | 0 | 0 |
| 249252 | 1 | 0 | 0 | 0 | 0 |
| 252253 | 1 | 0 | 0 | 0 | 0 |
| 252254 | 1 | 0 | 0 | 0 | 0 |
| 252255 | 1 | 0 | 0 | 0 | 0 |
| 255256 | 1 | 0 | 0 | 0 | 0 |
| 255257 | 1 | 0 | 0 | 0 | 0 |
| 255258 | 1 | 0 | 0 | 0 | 0 |
| 258259 | 1 | 0 | 0 | 0 | 0 |
| 258260 | 1 | 0 | 0 | 0 | 0 |
| 258261 | 1 | 0 | 0 | 0 | 0 |
| 261262 | 1 | 0 | 0 | 0 | 0 |
| 262263 | 1 | 0 | 0 | 0 | 0 |
| 262269 | 2 | 0 | 0 | 0 | 0 |
| 263264 | 1 | 0 | 0 | 0 | 0 |
| 263265 | 1 | 0 | 0 | 0 | 0 |
| 263266 | 1 | 0 | 0 | 0 | 0 |
| 266267 | 1 | 0 | 0 | 0 | 0 |
| 266268 | 1 | 0 | 0 | 0 | 0 |
| 266276 | 1 | 0 | 0 | 0 | 0 |
| 270271 | 1 | 0 | 0 | 0 | 0 |



```

270272 1 0 0 0 0
270273 1 0 0 0 0
270289 1 0 0 0 0
273274 1 0 0 0 0
273275 1 0 0 0 0
273276 1 0 0 0 0
276292 1 0 0 0 0
277278 1 0 0 0 0
277279 1 0 0 0 0
277288 1 0 0 0 0
277289 1 0 0 0 0
279280 1 0 0 0 0
280281 1 0 0 0 0
280282 1 0 0 0 0
280283 1 0 0 0 0
284285 1 0 0 0 0
284286 1 0 0 0 0
284287 1 0 0 0 0
284288 1 0 0 0 0
289290 1 0 0 0 0
289291 1 0 0 0 0
292293 1 0 0 0 0
292294 1 0 0 0 0
292295 1 0 0 0 0
295296 1 0 0 0 0
295297 1 0 0 0 0
295298 1 0 0 0 0
298299 1 0 0 0 0
298303 2 0 0 0 0
299300 1 0 0 0 0
300301 1 0 0 0 0
300302 1 0 0 0 0
300304 1 0 0 0 0
304305 1 0 0 0 0
304306 1 0 0 0 0
304307 1 0 0 0 0
307308 1 0 0 0 0
307309 1 0 0 0 0
307310 1 0 0 0 0
310311 1 0 0 0 0
310312 1 0 0 0 0
310313 1 0 0 0 0
313314 1 0 0 0 0
313315 1 0 0 0 0
313316 1 0 0 0 0
316317 1 0 0 0 0
316318 1 0 0 0 0
316319 1 0 0 0 0
319320 1 0 0 0 0
319321 1 0 0 0 0
319322 1 0 0 0 0
322323 1 0 0 0 0
322324 1 0 0 0 0
322325 1 0 0 0 0
325326 1 0 0 0 0
325327 1 0 0 0 0
325328 1 0 0 0 0
328329 1 0 0 0 0
329330 1 0 0 0 0
329337 2 0 0 0 0
330331 1 0 0 0 0
330332 1 0 0 0 0
330333 1 0 0 0 0
333334 1 0 0 0 0
333335 1 0 0 0 0
333336 1 0 0 0 0

```

```

M END
> <NAME>
LL8_1

```

```

$$$$
M17_1
MOE2012 3D

```

```

367371 0 0 1 0 0 0 0 0999 V2000
 32.8660 -9.9140 5.6990 C 0 0 0 0 0 0 0 0 0 0 0 0 0 0 0
 31.7170 -10.5760 6.1450 C 0 0 0 0 0 0 0 0 0 0 0 0 0 0 0
 30.4600 -10.0440 5.8300 C 0 0 0 0 0 0 0 0 0 0 0 0 0 0 0
 29.5690 -10.5450 6.2020 H 0 0 0 0 0 0 0 0 0 0 0 0 0 0 0
 30.3400 -8.8930 5.0380 C 0 0 0 0 0 0 0 0 0 0 0 0 0 0 0
 31.5000 -8.2770 4.5540 C 0 0 0 0 0 0 0 0 0 0 0 0 0 0 0

```











|     |     |   |   |   |   |   |
|-----|-----|---|---|---|---|---|
| 43  | 44  | 1 | 0 | 0 | 0 | 0 |
| 43  | 45  | 1 | 0 | 0 | 0 | 0 |
| 43  | 46  | 1 | 0 | 0 | 0 | 0 |
| 46  | 47  | 1 | 0 | 0 | 0 | 0 |
| 46  | 51  | 2 | 0 | 0 | 0 | 0 |
| 47  | 48  | 1 | 0 | 0 | 0 | 0 |
| 48  | 49  | 1 | 0 | 0 | 0 | 0 |
| 48  | 50  | 1 | 0 | 0 | 0 | 0 |
| 48  | 52  | 1 | 0 | 0 | 0 | 0 |
| 52  | 53  | 1 | 0 | 0 | 0 | 0 |
| 52  | 54  | 1 | 0 | 0 | 0 | 0 |
| 52  | 55  | 1 | 0 | 0 | 0 | 0 |
| 55  | 56  | 1 | 0 | 0 | 0 | 0 |
| 55  | 57  | 1 | 0 | 0 | 0 | 0 |
| 55  | 58  | 1 | 0 | 0 | 0 | 0 |
| 58  | 59  | 1 | 0 | 0 | 0 | 0 |
| 59  | 60  | 1 | 0 | 0 | 0 | 0 |
| 59  | 61  | 1 | 0 | 0 | 0 | 0 |
| 59  | 62  | 1 | 0 | 0 | 0 | 0 |
| 62  | 63  | 1 | 0 | 0 | 0 | 0 |
| 62  | 64  | 1 | 0 | 0 | 0 | 0 |
| 62  | 65  | 1 | 0 | 0 | 0 | 0 |
| 65  | 66  | 1 | 0 | 0 | 0 | 0 |
| 65  | 67  | 1 | 0 | 0 | 0 | 0 |
| 65  | 68  | 1 | 0 | 0 | 0 | 0 |
| 68  | 69  | 1 | 0 | 0 | 0 | 0 |
| 69  | 70  | 1 | 0 | 0 | 0 | 0 |
| 69  | 71  | 1 | 0 | 0 | 0 | 0 |
| 69  | 72  | 1 | 0 | 0 | 0 | 0 |
| 72  | 73  | 1 | 0 | 0 | 0 | 0 |
| 72  | 74  | 1 | 0 | 0 | 0 | 0 |
| 75  | 76  | 1 | 0 | 0 | 0 | 0 |
| 75  | 82  | 2 | 0 | 0 | 0 | 0 |
| 75  | 84  | 1 | 0 | 0 | 0 | 0 |
| 76  | 77  | 2 | 0 | 0 | 0 | 0 |
| 76  | 85  | 1 | 0 | 0 | 0 | 0 |
| 77  | 78  | 1 | 0 | 0 | 0 | 0 |
| 77  | 79  | 1 | 0 | 0 | 0 | 0 |
| 79  | 80  | 2 | 0 | 0 | 0 | 0 |
| 79  | 94  | 1 | 0 | 0 | 0 | 0 |
| 80  | 81  | 1 | 0 | 0 | 0 | 0 |
| 80  | 82  | 1 | 0 | 0 | 0 | 0 |
| 82  | 83  | 1 | 0 | 0 | 0 | 0 |
| 84  | 90  | 1 | 0 | 0 | 0 | 0 |
| 85  | 86  | 1 | 0 | 0 | 0 | 0 |
| 86  | 87  | 1 | 0 | 0 | 0 | 0 |
| 86  | 88  | 1 | 0 | 0 | 0 | 0 |
| 86  | 89  | 1 | 0 | 0 | 0 | 0 |
| 90  | 91  | 1 | 0 | 0 | 0 | 0 |
| 90  | 92  | 1 | 0 | 0 | 0 | 0 |
| 90  | 93  | 1 | 0 | 0 | 0 | 0 |
| 94  | 95  | 1 | 0 | 0 | 0 | 0 |
| 94  | 96  | 1 | 0 | 0 | 0 | 0 |
| 94  | 97  | 1 | 0 | 0 | 0 | 0 |
| 97  | 98  | 1 | 0 | 0 | 0 | 0 |
| 97  | 99  | 1 | 0 | 0 | 0 | 0 |
| 97  | 100 | 1 | 0 | 0 | 0 | 0 |
| 100 | 113 | 1 | 0 | 0 | 0 | 0 |
| 101 | 102 | 1 | 0 | 0 | 0 | 0 |
| 101 | 103 | 1 | 0 | 0 | 0 | 0 |
| 101 | 104 | 1 | 0 | 0 | 0 | 0 |
| 101 | 145 | 1 | 0 | 0 | 0 | 0 |
| 104 | 105 | 1 | 0 | 0 | 0 | 0 |
| 105 | 106 | 1 | 0 | 0 | 0 | 0 |
| 105 | 112 | 2 | 0 | 0 | 0 | 0 |
| 106 | 107 | 1 | 0 | 0 | 0 | 0 |
| 106 | 108 | 1 | 0 | 0 | 0 | 0 |
| 106 | 109 | 1 | 0 | 0 | 0 | 0 |
| 109 | 110 | 1 | 0 | 0 | 0 | 0 |
| 109 | 111 | 1 | 0 | 0 | 0 | 0 |
| 109 | 173 | 1 | 0 | 0 | 0 | 0 |
| 113 | 114 | 1 | 0 | 0 | 0 | 0 |
| 113 | 115 | 1 | 0 | 0 | 0 | 0 |
| 113 | 116 | 1 | 0 | 0 | 0 | 0 |
| 116 | 117 | 1 | 0 | 0 | 0 | 0 |
| 116 | 118 | 1 | 0 | 0 | 0 | 0 |
| 116 | 119 | 1 | 0 | 0 | 0 | 0 |
| 119 | 120 | 1 | 0 | 0 | 0 | 0 |
| 119 | 124 | 2 | 0 | 0 | 0 | 0 |
| 120 | 121 | 1 | 0 | 0 | 0 | 0 |
| 121 | 122 | 1 | 0 | 0 | 0 | 0 |

|        |   |   |   |   |   |
|--------|---|---|---|---|---|
| 121123 | 1 | 0 | 0 | 0 | 0 |
| 121125 | 1 | 0 | 0 | 0 | 0 |
| 125126 | 1 | 0 | 0 | 0 | 0 |
| 125127 | 1 | 0 | 0 | 0 | 0 |
| 125128 | 1 | 0 | 0 | 0 | 0 |
| 128129 | 1 | 0 | 0 | 0 | 0 |
| 128130 | 1 | 0 | 0 | 0 | 0 |
| 128131 | 1 | 0 | 0 | 0 | 0 |
| 131132 | 1 | 0 | 0 | 0 | 0 |
| 132133 | 1 | 0 | 0 | 0 | 0 |
| 132134 | 1 | 0 | 0 | 0 | 0 |
| 132135 | 1 | 0 | 0 | 0 | 0 |
| 135136 | 1 | 0 | 0 | 0 | 0 |
| 135137 | 1 | 0 | 0 | 0 | 0 |
| 135138 | 1 | 0 | 0 | 0 | 0 |
| 138139 | 1 | 0 | 0 | 0 | 0 |
| 138140 | 1 | 0 | 0 | 0 | 0 |
| 138141 | 1 | 0 | 0 | 0 | 0 |
| 141142 | 1 | 0 | 0 | 0 | 0 |
| 142143 | 1 | 0 | 0 | 0 | 0 |
| 142144 | 1 | 0 | 0 | 0 | 0 |
| 142145 | 1 | 0 | 0 | 0 | 0 |
| 145146 | 1 | 0 | 0 | 0 | 0 |
| 145147 | 1 | 0 | 0 | 0 | 0 |
| 148149 | 1 | 0 | 0 | 0 | 0 |
| 148155 | 2 | 0 | 0 | 0 | 0 |
| 148157 | 1 | 0 | 0 | 0 | 0 |
| 149150 | 2 | 0 | 0 | 0 | 0 |
| 149158 | 1 | 0 | 0 | 0 | 0 |
| 150151 | 1 | 0 | 0 | 0 | 0 |
| 150152 | 1 | 0 | 0 | 0 | 0 |
| 152153 | 2 | 0 | 0 | 0 | 0 |
| 152167 | 1 | 0 | 0 | 0 | 0 |
| 153154 | 1 | 0 | 0 | 0 | 0 |
| 153155 | 1 | 0 | 0 | 0 | 0 |
| 155156 | 1 | 0 | 0 | 0 | 0 |
| 157163 | 1 | 0 | 0 | 0 | 0 |
| 158159 | 1 | 0 | 0 | 0 | 0 |
| 159160 | 1 | 0 | 0 | 0 | 0 |
| 159161 | 1 | 0 | 0 | 0 | 0 |
| 159162 | 1 | 0 | 0 | 0 | 0 |
| 163164 | 1 | 0 | 0 | 0 | 0 |
| 163165 | 1 | 0 | 0 | 0 | 0 |
| 163166 | 1 | 0 | 0 | 0 | 0 |
| 167168 | 1 | 0 | 0 | 0 | 0 |
| 167169 | 1 | 0 | 0 | 0 | 0 |
| 167170 | 1 | 0 | 0 | 0 | 0 |
| 170171 | 1 | 0 | 0 | 0 | 0 |
| 170172 | 1 | 0 | 0 | 0 | 0 |
| 170173 | 1 | 0 | 0 | 0 | 0 |
| 173186 | 1 | 0 | 0 | 0 | 0 |
| 174175 | 1 | 0 | 0 | 0 | 0 |
| 174176 | 1 | 0 | 0 | 0 | 0 |
| 174177 | 1 | 0 | 0 | 0 | 0 |
| 174218 | 1 | 0 | 0 | 0 | 0 |
| 177178 | 1 | 0 | 0 | 0 | 0 |
| 178179 | 1 | 0 | 0 | 0 | 0 |
| 178185 | 2 | 0 | 0 | 0 | 0 |
| 179180 | 1 | 0 | 0 | 0 | 0 |
| 179181 | 1 | 0 | 0 | 0 | 0 |
| 179182 | 1 | 0 | 0 | 0 | 0 |
| 182183 | 1 | 0 | 0 | 0 | 0 |
| 182184 | 1 | 0 | 0 | 0 | 0 |
| 182246 | 1 | 0 | 0 | 0 | 0 |
| 186187 | 1 | 0 | 0 | 0 | 0 |
| 186188 | 1 | 0 | 0 | 0 | 0 |
| 186189 | 1 | 0 | 0 | 0 | 0 |
| 189190 | 1 | 0 | 0 | 0 | 0 |
| 189191 | 1 | 0 | 0 | 0 | 0 |
| 189192 | 1 | 0 | 0 | 0 | 0 |
| 192193 | 1 | 0 | 0 | 0 | 0 |
| 192197 | 2 | 0 | 0 | 0 | 0 |
| 193194 | 1 | 0 | 0 | 0 | 0 |
| 194195 | 1 | 0 | 0 | 0 | 0 |
| 194196 | 1 | 0 | 0 | 0 | 0 |
| 194198 | 1 | 0 | 0 | 0 | 0 |
| 198199 | 1 | 0 | 0 | 0 | 0 |
| 198200 | 1 | 0 | 0 | 0 | 0 |
| 198201 | 1 | 0 | 0 | 0 | 0 |
| 201202 | 1 | 0 | 0 | 0 | 0 |
| 201203 | 1 | 0 | 0 | 0 | 0 |



|        |   |   |   |   |   |
|--------|---|---|---|---|---|
| 201204 | 1 | 0 | 0 | 0 | 0 |
| 204205 | 1 | 0 | 0 | 0 | 0 |
| 205206 | 1 | 0 | 0 | 0 | 0 |
| 205207 | 1 | 0 | 0 | 0 | 0 |
| 205208 | 1 | 0 | 0 | 0 | 0 |
| 208209 | 1 | 0 | 0 | 0 | 0 |
| 208210 | 1 | 0 | 0 | 0 | 0 |
| 208211 | 1 | 0 | 0 | 0 | 0 |
| 211212 | 1 | 0 | 0 | 0 | 0 |
| 211213 | 1 | 0 | 0 | 0 | 0 |
| 211214 | 1 | 0 | 0 | 0 | 0 |
| 214215 | 1 | 0 | 0 | 0 | 0 |
| 215216 | 1 | 0 | 0 | 0 | 0 |
| 215217 | 1 | 0 | 0 | 0 | 0 |
| 215218 | 1 | 0 | 0 | 0 | 0 |
| 218219 | 1 | 0 | 0 | 0 | 0 |
| 218220 | 1 | 0 | 0 | 0 | 0 |
| 221222 | 1 | 0 | 0 | 0 | 0 |
| 221228 | 2 | 0 | 0 | 0 | 0 |
| 221230 | 1 | 0 | 0 | 0 | 0 |
| 222223 | 2 | 0 | 0 | 0 | 0 |
| 222231 | 1 | 0 | 0 | 0 | 0 |
| 223224 | 1 | 0 | 0 | 0 | 0 |
| 223225 | 1 | 0 | 0 | 0 | 0 |
| 225226 | 2 | 0 | 0 | 0 | 0 |
| 225240 | 1 | 0 | 0 | 0 | 0 |
| 226227 | 1 | 0 | 0 | 0 | 0 |
| 226228 | 1 | 0 | 0 | 0 | 0 |
| 228229 | 1 | 0 | 0 | 0 | 0 |
| 230236 | 1 | 0 | 0 | 0 | 0 |
| 231232 | 1 | 0 | 0 | 0 | 0 |
| 232233 | 1 | 0 | 0 | 0 | 0 |
| 232234 | 1 | 0 | 0 | 0 | 0 |
| 232235 | 1 | 0 | 0 | 0 | 0 |
| 236237 | 1 | 0 | 0 | 0 | 0 |
| 236238 | 1 | 0 | 0 | 0 | 0 |
| 236239 | 1 | 0 | 0 | 0 | 0 |
| 240241 | 1 | 0 | 0 | 0 | 0 |
| 240242 | 1 | 0 | 0 | 0 | 0 |
| 240243 | 1 | 0 | 0 | 0 | 0 |
| 243244 | 1 | 0 | 0 | 0 | 0 |
| 243245 | 1 | 0 | 0 | 0 | 0 |
| 243246 | 1 | 0 | 0 | 0 | 0 |
| 246259 | 1 | 0 | 0 | 0 | 0 |
| 247248 | 1 | 0 | 0 | 0 | 0 |
| 247249 | 1 | 0 | 0 | 0 | 0 |
| 247250 | 1 | 0 | 0 | 0 | 0 |
| 247291 | 1 | 0 | 0 | 0 | 0 |
| 250251 | 1 | 0 | 0 | 0 | 0 |
| 251252 | 1 | 0 | 0 | 0 | 0 |
| 251258 | 2 | 0 | 0 | 0 | 0 |
| 252253 | 1 | 0 | 0 | 0 | 0 |
| 252254 | 1 | 0 | 0 | 0 | 0 |
| 252255 | 1 | 0 | 0 | 0 | 0 |
| 255256 | 1 | 0 | 0 | 0 | 0 |
| 255257 | 1 | 0 | 0 | 0 | 0 |
| 255319 | 1 | 0 | 0 | 0 | 0 |
| 259260 | 1 | 0 | 0 | 0 | 0 |
| 259261 | 1 | 0 | 0 | 0 | 0 |
| 259262 | 1 | 0 | 0 | 0 | 0 |
| 262263 | 1 | 0 | 0 | 0 | 0 |
| 262264 | 1 | 0 | 0 | 0 | 0 |
| 262265 | 1 | 0 | 0 | 0 | 0 |
| 265266 | 1 | 0 | 0 | 0 | 0 |
| 265270 | 2 | 0 | 0 | 0 | 0 |
| 266267 | 1 | 0 | 0 | 0 | 0 |
| 267268 | 1 | 0 | 0 | 0 | 0 |
| 267269 | 1 | 0 | 0 | 0 | 0 |
| 267271 | 1 | 0 | 0 | 0 | 0 |
| 271272 | 1 | 0 | 0 | 0 | 0 |
| 271273 | 1 | 0 | 0 | 0 | 0 |
| 271274 | 1 | 0 | 0 | 0 | 0 |
| 274275 | 1 | 0 | 0 | 0 | 0 |
| 274276 | 1 | 0 | 0 | 0 | 0 |
| 274277 | 1 | 0 | 0 | 0 | 0 |
| 277278 | 1 | 0 | 0 | 0 | 0 |
| 278279 | 1 | 0 | 0 | 0 | 0 |
| 278280 | 1 | 0 | 0 | 0 | 0 |
| 278281 | 1 | 0 | 0 | 0 | 0 |
| 281282 | 1 | 0 | 0 | 0 | 0 |
| 281283 | 1 | 0 | 0 | 0 | 0 |

|        |   |   |   |   |   |
|--------|---|---|---|---|---|
| 281284 | 1 | 0 | 0 | 0 | 0 |
| 284285 | 1 | 0 | 0 | 0 | 0 |
| 284286 | 1 | 0 | 0 | 0 | 0 |
| 284287 | 1 | 0 | 0 | 0 | 0 |
| 287288 | 1 | 0 | 0 | 0 | 0 |
| 288289 | 1 | 0 | 0 | 0 | 0 |
| 288290 | 1 | 0 | 0 | 0 | 0 |
| 288291 | 1 | 0 | 0 | 0 | 0 |
| 291292 | 1 | 0 | 0 | 0 | 0 |
| 291293 | 1 | 0 | 0 | 0 | 0 |
| 294295 | 1 | 0 | 0 | 0 | 0 |
| 294301 | 2 | 0 | 0 | 0 | 0 |
| 294303 | 1 | 0 | 0 | 0 | 0 |
| 295296 | 2 | 0 | 0 | 0 | 0 |
| 295304 | 1 | 0 | 0 | 0 | 0 |
| 296297 | 1 | 0 | 0 | 0 | 0 |
| 296298 | 1 | 0 | 0 | 0 | 0 |
| 298299 | 2 | 0 | 0 | 0 | 0 |
| 298313 | 1 | 0 | 0 | 0 | 0 |
| 299300 | 1 | 0 | 0 | 0 | 0 |
| 299301 | 1 | 0 | 0 | 0 | 0 |
| 301302 | 1 | 0 | 0 | 0 | 0 |
| 303309 | 1 | 0 | 0 | 0 | 0 |
| 304305 | 1 | 0 | 0 | 0 | 0 |
| 305306 | 1 | 0 | 0 | 0 | 0 |
| 305307 | 1 | 0 | 0 | 0 | 0 |
| 305308 | 1 | 0 | 0 | 0 | 0 |
| 309310 | 1 | 0 | 0 | 0 | 0 |
| 309311 | 1 | 0 | 0 | 0 | 0 |
| 309312 | 1 | 0 | 0 | 0 | 0 |
| 313314 | 1 | 0 | 0 | 0 | 0 |
| 313315 | 1 | 0 | 0 | 0 | 0 |
| 313316 | 1 | 0 | 0 | 0 | 0 |
| 316317 | 1 | 0 | 0 | 0 | 0 |
| 316318 | 1 | 0 | 0 | 0 | 0 |
| 316319 | 1 | 0 | 0 | 0 | 0 |
| 319333 | 1 | 0 | 0 | 0 | 0 |
| 320321 | 1 | 0 | 0 | 0 | 0 |
| 320322 | 1 | 0 | 0 | 0 | 0 |
| 320323 | 1 | 0 | 0 | 0 | 0 |
| 320365 | 1 | 0 | 0 | 0 | 0 |
| 323324 | 1 | 0 | 0 | 0 | 0 |
| 324325 | 1 | 0 | 0 | 0 | 0 |
| 324332 | 2 | 0 | 0 | 0 | 0 |
| 325326 | 1 | 0 | 0 | 0 | 0 |
| 325327 | 1 | 0 | 0 | 0 | 0 |
| 325328 | 1 | 0 | 0 | 0 | 0 |
| 328329 | 1 | 0 | 0 | 0 | 0 |
| 328330 | 1 | 0 | 0 | 0 | 0 |
| 328331 | 1 | 0 | 0 | 0 | 0 |
| 333334 | 1 | 0 | 0 | 0 | 0 |
| 333335 | 1 | 0 | 0 | 0 | 0 |
| 333336 | 1 | 0 | 0 | 0 | 0 |
| 336337 | 1 | 0 | 0 | 0 | 0 |
| 336338 | 1 | 0 | 0 | 0 | 0 |
| 336339 | 1 | 0 | 0 | 0 | 0 |
| 339340 | 1 | 0 | 0 | 0 | 0 |
| 339344 | 2 | 0 | 0 | 0 | 0 |
| 340341 | 1 | 0 | 0 | 0 | 0 |
| 341342 | 1 | 0 | 0 | 0 | 0 |
| 341343 | 1 | 0 | 0 | 0 | 0 |
| 341345 | 1 | 0 | 0 | 0 | 0 |
| 345346 | 1 | 0 | 0 | 0 | 0 |
| 345347 | 1 | 0 | 0 | 0 | 0 |
| 345348 | 1 | 0 | 0 | 0 | 0 |
| 348349 | 1 | 0 | 0 | 0 | 0 |
| 348350 | 1 | 0 | 0 | 0 | 0 |
| 348351 | 1 | 0 | 0 | 0 | 0 |
| 351352 | 1 | 0 | 0 | 0 | 0 |
| 352353 | 1 | 0 | 0 | 0 | 0 |
| 352354 | 1 | 0 | 0 | 0 | 0 |
| 352355 | 1 | 0 | 0 | 0 | 0 |
| 355356 | 1 | 0 | 0 | 0 | 0 |
| 355357 | 1 | 0 | 0 | 0 | 0 |
| 355358 | 1 | 0 | 0 | 0 | 0 |
| 358359 | 1 | 0 | 0 | 0 | 0 |
| 358360 | 1 | 0 | 0 | 0 | 0 |
| 358361 | 1 | 0 | 0 | 0 | 0 |
| 361362 | 1 | 0 | 0 | 0 | 0 |
| 362363 | 1 | 0 | 0 | 0 | 0 |
| 362364 | 1 | 0 | 0 | 0 | 0 |

362365 1 0 0 0 0  
365366 1 0 0 0 0  
365367 1 0 0 0 0

M END  
> <NAME>  
M17\_1

\$\$\$  
O24\_1  
MOE2012 3D

322326 0 0 1 0 0 0 0 0999 V2000  
30.4200 -3.9000 -16.2330 O 0 0 0 0 0 0 0 0 0 0 0 0 0 0 0 0  
31.0400 -4.4750 -16.7150 H 0 0 0 0 0 0 0 0 0 0 0 0 0 0 0 0  
31.1930 -3.1380 -15.3030 C 0 0 0 0 0 0 0 0 0 0 0 0 0 0 0 0  
31.7220 -3.8210 -14.6310 H 0 0 0 0 0 0 0 0 0 0 0 0 0 0 0 0  
31.9150 -2.5510 -15.8780 H 0 0 0 0 0 0 0 0 0 0 0 0 0 0 0 0  
30.2320 -2.2320 -14.5350 C 0 0 0 3 0 0 0 0 0 0 0 0 0 0 0 0  
29.4960 -2.8420 -13.9970 H 0 0 0 0 0 0 0 0 0 0 0 0 0 0 0 0  
30.9750 -1.2940 -13.5720 C 0 0 0 0 0 0 0 0 0 0 0 0 0 0 0 0  
31.5460 -1.8840 -12.8490 H 0 0 0 0 0 0 0 0 0 0 0 0 0 0 0 0  
31.6660 -0.6680 -14.1500 H 0 0 0 0 0 0 0 0 0 0 0 0 0 0 0 0  
29.9980 -0.4410 -12.8790 N 0 0 0 3 0 0 0 0 0 0 0 0 0 0 0 0  
29.3720 -0.0790 -13.6060 H 0 0 0 0 0 0 0 0 0 0 0 0 0 0 0 0  
29.5020 -1.4490 -15.4940 O 0 0 0 0 0 0 0 0 0 0 0 0 0 0 0 0  
29.2460 -2.0930 -16.1870 H 0 0 0 0 0 0 0 0 0 0 0 0 0 0 0 0  
37.2100 -5.4660 -7.6710 C 0 0 0 0 0 0 0 0 0 0 0 0 0 0 0 0  
36.5920 -5.1990 -6.8060 H 0 0 0 0 0 0 0 0 0 0 0 0 0 0 0 0  
38.0210 -4.7340 -7.7650 H 0 0 0 0 0 0 0 0 0 0 0 0 0 0 0 0  
37.7920 -6.7610 -7.4380 O 0 0 0 0 0 0 0 0 0 0 0 0 0 0 0 0  
38.3650 -6.9260 -6.2120 C 0 0 0 0 0 0 0 0 0 0 0 0 0 0 0 0  
38.7790 -8.3640 -6.0290 C 0 0 0 0 0 0 0 0 0 0 0 0 0 0 0 0  
39.1070 -8.7500 -7.0040 H 0 0 0 0 0 0 0 0 0 0 0 0 0 0 0 0  
39.6710 -8.4030 -5.3940 H 0 0 0 0 0 0 0 0 0 0 0 0 0 0 0 0  
37.6160 -9.2080 -5.4950 C 0 0 0 0 0 0 0 0 0 0 0 0 0 0 0 0  
37.5850 -10.1090 -6.1230 H 0 0 0 0 0 0 0 0 0 0 0 0 0 0 0 0  
36.6520 -8.7060 -5.6410 H 0 0 0 0 0 0 0 0 0 0 0 0 0 0 0 0  
38.4940 -6.0570 -5.3610 O 0 0 0 0 0 0 0 0 0 0 0 0 0 0 0 0  
34.9160 -1.5200 -8.3520 C 0 0 0 0 0 0 0 0 0 0 0 0 0 0 0 0  
33.9970 -2.7420 -8.1230 C 0 0 0 0 0 0 0 0 0 0 0 0 0 0 0 0  
33.4170 -2.6440 -7.2010 H 0 0 0 0 0 0 0 0 0 0 0 0 0 0 0 0  
33.2730 -2.8940 -8.9320 H 0 0 0 0 0 0 0 0 0 0 0 0 0 0 0 0  
34.7620 -3.9380 -7.9860 O 0 0 0 0 0 0 0 0 0 0 0 0 0 0 0 0  
35.6010 -4.1500 -9.1210 C 0 0 0 0 0 0 0 0 0 0 0 0 0 0 0 0  
34.9690 -4.2040 -10.0180 H 0 0 0 0 0 0 0 0 0 0 0 0 0 0 0 0  
36.5340 -3.0850 -9.3330 O 0 0 0 0 0 0 0 0 0 0 0 0 0 0 0 0  
36.3770 -2.0180 -8.4010 C 0 0 0 0 0 0 0 0 0 0 0 0 0 0 0 0  
37.0540 -1.2120 -8.7070 H 0 0 0 0 0 0 0 0 0 0 0 0 0 0 0 0  
36.7240 -2.3610 -7.4180 H 0 0 0 0 0 0 0 0 0 0 0 0 0 0 0 0  
34.5730 -0.8580 -9.7120 C 0 0 0 0 0 0 0 0 0 0 0 0 0 0 0 0  
35.1460 0.0690 -9.8380 H 0 0 0 0 0 0 0 0 0 0 0 0 0 0 0 0  
34.8220 -1.5350 -10.5390 H 0 0 0 0 0 0 0 0 0 0 0 0 0 0 0 0  
34.8100 -0.5010 -7.1800 C 0 0 0 0 0 0 0 0 0 0 0 0 0 0 0 0  
35.0630 -1.0150 -6.2440 H 0 0 0 0 0 0 0 0 0 0 0 0 0 0 0 0  
35.5730 0.2790 -7.3090 H 0 0 0 0 0 0 0 0 0 0 0 0 0 0 0 0  
33.4680 0.1920 -6.9780 C 0 0 0 0 0 0 0 0 0 0 0 0 0 0 0 0  
32.6380 -0.5170 -6.9390 H 0 0 0 0 0 0 0 0 0 0 0 0 0 0 0 0  
33.2730 0.9220 -7.7690 H 0 0 0 0 0 0 0 0 0 0 0 0 0 0 0 0  
33.4780 0.7450 -6.0320 H 0 0 0 0 0 0 0 0 0 0 0 0 0 0 0 0  
30.6150 0.6840 -12.1710 C 0 0 0 0 0 0 0 0 0 0 0 0 0 0 0 0  
31.2950 1.2420 -12.8250 H 0 0 0 0 0 0 0 0 0 0 0 0 0 0 0 0  
29.7970 1.3730 -11.9280 H 0 0 0 0 0 0 0 0 0 0 0 0 0 0 0 0  
31.2670 0.2810 -10.8510 C 0 0 0 0 0 0 0 0 0 0 0 0 0 0 0 0  
31.1960 1.1250 -10.1540 H 0 0 0 0 0 0 0 0 0 0 0 0 0 0 0 0  
30.7410 -0.5710 -10.4030 H 0 0 0 0 0 0 0 0 0 0 0 0 0 0 0 0  
32.7340 -0.0510 -10.9750 C 0 0 0 0 0 0 0 0 0 0 0 0 0 0 0 0  
33.1710 -0.5540 -9.7840 O 0 0 0 0 0 0 0 0 0 0 0 0 0 0 0 0  
33.4310 0.1320 -11.9620 O 0 0 0 0 0 0 0 0 0 0 0 0 0 0 0 0  
36.3470 -5.5000 -8.9540 C 0 0 0 0 0 0 0 0 0 0 0 0 0 0 0 0  
37.2480 -5.7650 -10.1760 C 0 0 0 0 0 0 0 0 0 0 0 0 0 0 0 0  
38.0400 -5.0130 -10.2630 H 0 0 0 0 0 0 0 0 0 0 0 0 0 0 0 0  
36.6660 -5.7470 -11.1040 H 0 0 0 0 0 0 0 0 0 0 0 0 0 0 0 0  
37.7330 -6.7460 -10.1120 H 0 0 0 0 0 0 0 0 0 0 0 0 0 0 0 0  
35.3140 -6.6440 -8.8530 C 0 0 0 0 0 0 0 0 0 0 0 0 0 0 0 0  
34.7030 -6.5550 -7.9480 H 0 0 0 0 0 0 0 0 0 0 0 0 0 0 0 0  
35.7990 -7.6270 -8.8270 H 0 0 0 0 0 0 0 0 0 0 0 0 0 0 0 0  
34.6370 -6.6390 -9.7150 H 0 0 0 0 0 0 0 0 0 0 0 0 0 0 0 0  
36.2160 -13.1200 -0.9360 O 0 0 0 0 0 0 0 0 0 0 0 0 0 0 0 0  
35.7390 -13.9690 -0.9010 H 0 0 0 0 0 0 0 0 0 0 0 0 0 0 0 0  
36.1350 -12.6510 -2.2850 C 0 0 0 0 0 0 0 0 0 0 0 0 0 0 0 0  
36.5640 -13.4030 -2.9540 H 0 0 0 0 0 0 0 0 0 0 0 0 0 0 0 0







|         |         |          |   |   |   |   |   |   |   |   |   |   |   |   |   |
|---------|---------|----------|---|---|---|---|---|---|---|---|---|---|---|---|---|
| 54.3730 | 8.0750  | -20.4690 | O | 0 | 0 | 0 | 0 | 0 | 0 | 0 | 0 | 0 | 0 | 0 | 0 |
| 51.6410 | 12.4350 | -15.0910 | C | 0 | 0 | 0 | 0 | 0 | 0 | 0 | 0 | 0 | 0 | 0 | 0 |
| 53.0060 | 12.9470 | -14.5860 | C | 0 | 0 | 0 | 0 | 0 | 0 | 0 | 0 | 0 | 0 | 0 | 0 |
| 53.5420 | 13.4990 | -15.3670 | H | 0 | 0 | 0 | 0 | 0 | 0 | 0 | 0 | 0 | 0 | 0 | 0 |
| 53.6440 | 12.1150 | -14.2670 | H | 0 | 0 | 0 | 0 | 0 | 0 | 0 | 0 | 0 | 0 | 0 | 0 |
| 52.8920 | 13.6200 | -13.7280 | H | 0 | 0 | 0 | 0 | 0 | 0 | 0 | 0 | 0 | 0 | 0 | 0 |
| 50.9130 | 11.7510 | -13.9140 | C | 0 | 0 | 0 | 0 | 0 | 0 | 0 | 0 | 0 | 0 | 0 | 0 |
| 49.9010 | 11.4380 | -14.1960 | H | 0 | 0 | 0 | 0 | 0 | 0 | 0 | 0 | 0 | 0 | 0 | 0 |
| 50.8220 | 12.4200 | -13.0510 | H | 0 | 0 | 0 | 0 | 0 | 0 | 0 | 0 | 0 | 0 | 0 | 0 |
| 51.4570 | 10.8600 | -13.5800 | H | 0 | 0 | 0 | 0 | 0 | 0 | 0 | 0 | 0 | 0 | 0 | 0 |
| 1       | 2       | 1        | 0 | 0 | 0 | 0 |   |   |   |   |   |   |   |   |   |
| 1       | 3       | 1        | 0 | 0 | 0 | 0 |   |   |   |   |   |   |   |   |   |
| 3       | 4       | 1        | 0 | 0 | 0 | 0 |   |   |   |   |   |   |   |   |   |
| 3       | 5       | 1        | 0 | 0 | 0 | 0 |   |   |   |   |   |   |   |   |   |
| 3       | 6       | 1        | 0 | 0 | 0 | 0 |   |   |   |   |   |   |   |   |   |
| 6       | 7       | 1        | 0 | 0 | 0 | 0 |   |   |   |   |   |   |   |   |   |
| 6       | 8       | 1        | 0 | 0 | 0 | 0 |   |   |   |   |   |   |   |   |   |
| 6       | 13      | 1        | 0 | 0 | 0 | 0 |   |   |   |   |   |   |   |   |   |
| 8       | 9       | 1        | 0 | 0 | 0 | 0 |   |   |   |   |   |   |   |   |   |
| 8       | 10      | 1        | 0 | 0 | 0 | 0 |   |   |   |   |   |   |   |   |   |
| 8       | 11      | 1        | 0 | 0 | 0 | 0 |   |   |   |   |   |   |   |   |   |
| 11      | 12      | 1        | 0 | 0 | 0 | 0 |   |   |   |   |   |   |   |   |   |
| 11      | 48      | 1        | 0 | 0 | 0 | 0 |   |   |   |   |   |   |   |   |   |
| 13      | 14      | 1        | 0 | 0 | 0 | 0 |   |   |   |   |   |   |   |   |   |
| 15      | 16      | 1        | 0 | 0 | 0 | 0 |   |   |   |   |   |   |   |   |   |
| 15      | 17      | 1        | 0 | 0 | 0 | 0 |   |   |   |   |   |   |   |   |   |
| 15      | 18      | 1        | 0 | 0 | 0 | 0 |   |   |   |   |   |   |   |   |   |
| 15      | 57      | 1        | 0 | 0 | 0 | 0 |   |   |   |   |   |   |   |   |   |
| 18      | 19      | 1        | 0 | 0 | 0 | 0 |   |   |   |   |   |   |   |   |   |
| 19      | 20      | 1        | 0 | 0 | 0 | 0 |   |   |   |   |   |   |   |   |   |
| 19      | 26      | 2        | 0 | 0 | 0 | 0 |   |   |   |   |   |   |   |   |   |
| 20      | 21      | 1        | 0 | 0 | 0 | 0 |   |   |   |   |   |   |   |   |   |
| 20      | 22      | 1        | 0 | 0 | 0 | 0 |   |   |   |   |   |   |   |   |   |
| 20      | 23      | 1        | 0 | 0 | 0 | 0 |   |   |   |   |   |   |   |   |   |
| 23      | 24      | 1        | 0 | 0 | 0 | 0 |   |   |   |   |   |   |   |   |   |
| 23      | 25      | 1        | 0 | 0 | 0 | 0 |   |   |   |   |   |   |   |   |   |
| 23      | 76      | 1        | 0 | 0 | 0 | 0 |   |   |   |   |   |   |   |   |   |
| 27      | 28      | 1        | 0 | 0 | 0 | 0 |   |   |   |   |   |   |   |   |   |
| 27      | 35      | 1        | 0 | 0 | 0 | 0 |   |   |   |   |   |   |   |   |   |
| 27      | 38      | 1        | 0 | 0 | 0 | 0 |   |   |   |   |   |   |   |   |   |
| 27      | 41      | 1        | 0 | 0 | 0 | 0 |   |   |   |   |   |   |   |   |   |
| 28      | 29      | 1        | 0 | 0 | 0 | 0 |   |   |   |   |   |   |   |   |   |
| 28      | 30      | 1        | 0 | 0 | 0 | 0 |   |   |   |   |   |   |   |   |   |
| 28      | 31      | 1        | 0 | 0 | 0 | 0 |   |   |   |   |   |   |   |   |   |
| 31      | 32      | 1        | 0 | 0 | 0 | 0 |   |   |   |   |   |   |   |   |   |
| 32      | 33      | 1        | 0 | 0 | 0 | 0 |   |   |   |   |   |   |   |   |   |
| 32      | 34      | 1        | 0 | 0 | 0 | 0 |   |   |   |   |   |   |   |   |   |
| 32      | 57      | 1        | 0 | 0 | 0 | 0 |   |   |   |   |   |   |   |   |   |
| 34      | 35      | 1        | 0 | 0 | 0 | 0 |   |   |   |   |   |   |   |   |   |
| 35      | 36      | 1        | 0 | 0 | 0 | 0 |   |   |   |   |   |   |   |   |   |
| 35      | 37      | 1        | 0 | 0 | 0 | 0 |   |   |   |   |   |   |   |   |   |
| 38      | 39      | 1        | 0 | 0 | 0 | 0 |   |   |   |   |   |   |   |   |   |
| 38      | 40      | 1        | 0 | 0 | 0 | 0 |   |   |   |   |   |   |   |   |   |
| 38      | 55      | 1        | 0 | 0 | 0 | 0 |   |   |   |   |   |   |   |   |   |
| 41      | 42      | 1        | 0 | 0 | 0 | 0 |   |   |   |   |   |   |   |   |   |
| 41      | 43      | 1        | 0 | 0 | 0 | 0 |   |   |   |   |   |   |   |   |   |
| 41      | 44      | 1        | 0 | 0 | 0 | 0 |   |   |   |   |   |   |   |   |   |
| 44      | 45      | 1        | 0 | 0 | 0 | 0 |   |   |   |   |   |   |   |   |   |
| 44      | 46      | 1        | 0 | 0 | 0 | 0 |   |   |   |   |   |   |   |   |   |
| 44      | 47      | 1        | 0 | 0 | 0 | 0 |   |   |   |   |   |   |   |   |   |
| 48      | 49      | 1        | 0 | 0 | 0 | 0 |   |   |   |   |   |   |   |   |   |
| 48      | 50      | 1        | 0 | 0 | 0 | 0 |   |   |   |   |   |   |   |   |   |
| 48      | 51      | 1        | 0 | 0 | 0 | 0 |   |   |   |   |   |   |   |   |   |
| 51      | 52      | 1        | 0 | 0 | 0 | 0 |   |   |   |   |   |   |   |   |   |
| 51      | 53      | 1        | 0 | 0 | 0 | 0 |   |   |   |   |   |   |   |   |   |
| 51      | 54      | 1        | 0 | 0 | 0 | 0 |   |   |   |   |   |   |   |   |   |
| 54      | 55      | 1        | 0 | 0 | 0 | 0 |   |   |   |   |   |   |   |   |   |
| 54      | 56      | 2        | 0 | 0 | 0 | 0 |   |   |   |   |   |   |   |   |   |
| 57      | 58      | 1        | 0 | 0 | 0 | 0 |   |   |   |   |   |   |   |   |   |
| 57      | 62      | 1        | 0 | 0 | 0 | 0 |   |   |   |   |   |   |   |   |   |
| 58      | 59      | 1        | 0 | 0 | 0 | 0 |   |   |   |   |   |   |   |   |   |
| 58      | 60      | 1        | 0 | 0 | 0 | 0 |   |   |   |   |   |   |   |   |   |
| 58      | 61      | 1        | 0 | 0 | 0 | 0 |   |   |   |   |   |   |   |   |   |
| 62      | 63      | 1        | 0 | 0 | 0 | 0 |   |   |   |   |   |   |   |   |   |
| 62      | 64      | 1        | 0 | 0 | 0 | 0 |   |   |   |   |   |   |   |   |   |
| 62      | 65      | 1        | 0 | 0 | 0 | 0 |   |   |   |   |   |   |   |   |   |
| 66      | 67      | 1        | 0 | 0 | 0 | 0 |   |   |   |   |   |   |   |   |   |
| 66      | 68      | 1        | 0 | 0 | 0 | 0 |   |   |   |   |   |   |   |   |   |
| 68      | 69      | 1        | 0 | 0 | 0 | 0 |   |   |   |   |   |   |   |   |   |
| 68      | 70      | 1        | 0 | 0 | 0 | 0 |   |   |   |   |   |   |   |   |   |
| 68      | 71      | 1        | 0 | 0 | 0 | 0 |   |   |   |   |   |   |   |   |   |

|     |     |   |   |   |   |   |
|-----|-----|---|---|---|---|---|
| 71  | 72  | 1 | 0 | 0 | 0 | 0 |
| 71  | 73  | 1 | 0 | 0 | 0 | 0 |
| 71  | 77  | 1 | 0 | 0 | 0 | 0 |
| 73  | 74  | 1 | 0 | 0 | 0 | 0 |
| 73  | 75  | 1 | 0 | 0 | 0 | 0 |
| 73  | 76  | 1 | 0 | 0 | 0 | 0 |
| 76  | 112 | 1 | 0 | 0 | 0 | 0 |
| 77  | 78  | 1 | 0 | 0 | 0 | 0 |
| 79  | 80  | 1 | 0 | 0 | 0 | 0 |
| 79  | 81  | 1 | 0 | 0 | 0 | 0 |
| 79  | 82  | 1 | 0 | 0 | 0 | 0 |
| 79  | 121 | 1 | 0 | 0 | 0 | 0 |
| 82  | 83  | 1 | 0 | 0 | 0 | 0 |
| 83  | 84  | 1 | 0 | 0 | 0 | 0 |
| 83  | 90  | 2 | 0 | 0 | 0 | 0 |
| 84  | 85  | 1 | 0 | 0 | 0 | 0 |
| 84  | 86  | 1 | 0 | 0 | 0 | 0 |
| 84  | 87  | 1 | 0 | 0 | 0 | 0 |
| 87  | 88  | 1 | 0 | 0 | 0 | 0 |
| 87  | 89  | 1 | 0 | 0 | 0 | 0 |
| 87  | 140 | 1 | 0 | 0 | 0 | 0 |
| 91  | 92  | 1 | 0 | 0 | 0 | 0 |
| 91  | 99  | 1 | 0 | 0 | 0 | 0 |
| 91  | 102 | 1 | 0 | 0 | 0 | 0 |
| 91  | 105 | 1 | 0 | 0 | 0 | 0 |
| 92  | 93  | 1 | 0 | 0 | 0 | 0 |
| 92  | 94  | 1 | 0 | 0 | 0 | 0 |
| 92  | 95  | 1 | 0 | 0 | 0 | 0 |
| 95  | 96  | 1 | 0 | 0 | 0 | 0 |
| 96  | 97  | 1 | 0 | 0 | 0 | 0 |
| 96  | 98  | 1 | 0 | 0 | 0 | 0 |
| 96  | 121 | 1 | 0 | 0 | 0 | 0 |
| 98  | 99  | 1 | 0 | 0 | 0 | 0 |
| 99  | 100 | 1 | 0 | 0 | 0 | 0 |
| 99  | 101 | 1 | 0 | 0 | 0 | 0 |
| 102 | 103 | 1 | 0 | 0 | 0 | 0 |
| 102 | 104 | 1 | 0 | 0 | 0 | 0 |
| 102 | 119 | 1 | 0 | 0 | 0 | 0 |
| 105 | 106 | 1 | 0 | 0 | 0 | 0 |
| 105 | 107 | 1 | 0 | 0 | 0 | 0 |
| 105 | 108 | 1 | 0 | 0 | 0 | 0 |
| 108 | 109 | 1 | 0 | 0 | 0 | 0 |
| 108 | 110 | 1 | 0 | 0 | 0 | 0 |
| 108 | 111 | 1 | 0 | 0 | 0 | 0 |
| 112 | 113 | 1 | 0 | 0 | 0 | 0 |
| 112 | 114 | 1 | 0 | 0 | 0 | 0 |
| 112 | 115 | 1 | 0 | 0 | 0 | 0 |
| 115 | 116 | 1 | 0 | 0 | 0 | 0 |
| 115 | 117 | 1 | 0 | 0 | 0 | 0 |
| 115 | 118 | 1 | 0 | 0 | 0 | 0 |
| 118 | 119 | 1 | 0 | 0 | 0 | 0 |
| 118 | 120 | 2 | 0 | 0 | 0 | 0 |
| 121 | 122 | 1 | 0 | 0 | 0 | 0 |
| 121 | 126 | 1 | 0 | 0 | 0 | 0 |
| 122 | 123 | 1 | 0 | 0 | 0 | 0 |
| 122 | 124 | 1 | 0 | 0 | 0 | 0 |
| 122 | 125 | 1 | 0 | 0 | 0 | 0 |
| 126 | 127 | 1 | 0 | 0 | 0 | 0 |
| 126 | 128 | 1 | 0 | 0 | 0 | 0 |
| 126 | 129 | 1 | 0 | 0 | 0 | 0 |
| 130 | 131 | 1 | 0 | 0 | 0 | 0 |
| 130 | 132 | 1 | 0 | 0 | 0 | 0 |
| 132 | 133 | 1 | 0 | 0 | 0 | 0 |
| 132 | 134 | 1 | 0 | 0 | 0 | 0 |
| 132 | 135 | 1 | 0 | 0 | 0 | 0 |
| 135 | 136 | 1 | 0 | 0 | 0 | 0 |
| 135 | 137 | 1 | 0 | 0 | 0 | 0 |
| 135 | 141 | 1 | 0 | 0 | 0 | 0 |
| 137 | 138 | 1 | 0 | 0 | 0 | 0 |
| 137 | 139 | 1 | 0 | 0 | 0 | 0 |
| 137 | 140 | 1 | 0 | 0 | 0 | 0 |
| 140 | 176 | 1 | 0 | 0 | 0 | 0 |
| 141 | 142 | 1 | 0 | 0 | 0 | 0 |
| 143 | 144 | 1 | 0 | 0 | 0 | 0 |
| 143 | 145 | 1 | 0 | 0 | 0 | 0 |
| 143 | 146 | 1 | 0 | 0 | 0 | 0 |
| 143 | 185 | 1 | 0 | 0 | 0 | 0 |
| 146 | 147 | 1 | 0 | 0 | 0 | 0 |
| 147 | 148 | 1 | 0 | 0 | 0 | 0 |
| 147 | 154 | 2 | 0 | 0 | 0 | 0 |
| 148 | 149 | 1 | 0 | 0 | 0 | 0 |



|        |   |   |   |   |   |
|--------|---|---|---|---|---|
| 148150 | 1 | 0 | 0 | 0 | 0 |
| 148151 | 1 | 0 | 0 | 0 | 0 |
| 151152 | 1 | 0 | 0 | 0 | 0 |
| 151153 | 1 | 0 | 0 | 0 | 0 |
| 151204 | 1 | 0 | 0 | 0 | 0 |
| 155156 | 1 | 0 | 0 | 0 | 0 |
| 155163 | 1 | 0 | 0 | 0 | 0 |
| 155166 | 1 | 0 | 0 | 0 | 0 |
| 155169 | 1 | 0 | 0 | 0 | 0 |
| 156157 | 1 | 0 | 0 | 0 | 0 |
| 156158 | 1 | 0 | 0 | 0 | 0 |
| 156159 | 1 | 0 | 0 | 0 | 0 |
| 159160 | 1 | 0 | 0 | 0 | 0 |
| 160161 | 1 | 0 | 0 | 0 | 0 |
| 160162 | 1 | 0 | 0 | 0 | 0 |
| 160185 | 1 | 0 | 0 | 0 | 0 |
| 162163 | 1 | 0 | 0 | 0 | 0 |
| 163164 | 1 | 0 | 0 | 0 | 0 |
| 163165 | 1 | 0 | 0 | 0 | 0 |
| 166167 | 1 | 0 | 0 | 0 | 0 |
| 166168 | 1 | 0 | 0 | 0 | 0 |
| 166183 | 1 | 0 | 0 | 0 | 0 |
| 169170 | 1 | 0 | 0 | 0 | 0 |
| 169171 | 1 | 0 | 0 | 0 | 0 |
| 169172 | 1 | 0 | 0 | 0 | 0 |
| 172173 | 1 | 0 | 0 | 0 | 0 |
| 172174 | 1 | 0 | 0 | 0 | 0 |
| 172175 | 1 | 0 | 0 | 0 | 0 |
| 176177 | 1 | 0 | 0 | 0 | 0 |
| 176178 | 1 | 0 | 0 | 0 | 0 |
| 176179 | 1 | 0 | 0 | 0 | 0 |
| 179180 | 1 | 0 | 0 | 0 | 0 |
| 179181 | 1 | 0 | 0 | 0 | 0 |
| 179182 | 1 | 0 | 0 | 0 | 0 |
| 182183 | 1 | 0 | 0 | 0 | 0 |
| 182184 | 2 | 0 | 0 | 0 | 0 |
| 185186 | 1 | 0 | 0 | 0 | 0 |
| 185190 | 1 | 0 | 0 | 0 | 0 |
| 186187 | 1 | 0 | 0 | 0 | 0 |
| 186188 | 1 | 0 | 0 | 0 | 0 |
| 186189 | 1 | 0 | 0 | 0 | 0 |
| 190191 | 1 | 0 | 0 | 0 | 0 |
| 190192 | 1 | 0 | 0 | 0 | 0 |
| 190193 | 1 | 0 | 0 | 0 | 0 |
| 194195 | 1 | 0 | 0 | 0 | 0 |
| 194196 | 1 | 0 | 0 | 0 | 0 |
| 196197 | 1 | 0 | 0 | 0 | 0 |
| 196198 | 1 | 0 | 0 | 0 | 0 |
| 196199 | 1 | 0 | 0 | 0 | 0 |
| 199200 | 1 | 0 | 0 | 0 | 0 |
| 199201 | 1 | 0 | 0 | 0 | 0 |
| 199205 | 1 | 0 | 0 | 0 | 0 |
| 201202 | 1 | 0 | 0 | 0 | 0 |
| 201203 | 1 | 0 | 0 | 0 | 0 |
| 201204 | 1 | 0 | 0 | 0 | 0 |
| 204240 | 1 | 0 | 0 | 0 | 0 |
| 205206 | 1 | 0 | 0 | 0 | 0 |
| 207208 | 1 | 0 | 0 | 0 | 0 |
| 207209 | 1 | 0 | 0 | 0 | 0 |
| 207210 | 1 | 0 | 0 | 0 | 0 |
| 207249 | 1 | 0 | 0 | 0 | 0 |
| 210211 | 1 | 0 | 0 | 0 | 0 |
| 211212 | 1 | 0 | 0 | 0 | 0 |
| 211218 | 2 | 0 | 0 | 0 | 0 |
| 212213 | 1 | 0 | 0 | 0 | 0 |
| 212214 | 1 | 0 | 0 | 0 | 0 |
| 212215 | 1 | 0 | 0 | 0 | 0 |
| 215216 | 1 | 0 | 0 | 0 | 0 |
| 215217 | 1 | 0 | 0 | 0 | 0 |
| 215268 | 1 | 0 | 0 | 0 | 0 |
| 219220 | 1 | 0 | 0 | 0 | 0 |
| 219227 | 1 | 0 | 0 | 0 | 0 |
| 219230 | 1 | 0 | 0 | 0 | 0 |
| 219233 | 1 | 0 | 0 | 0 | 0 |
| 220221 | 1 | 0 | 0 | 0 | 0 |
| 220222 | 1 | 0 | 0 | 0 | 0 |
| 220223 | 1 | 0 | 0 | 0 | 0 |
| 223224 | 1 | 0 | 0 | 0 | 0 |
| 224225 | 1 | 0 | 0 | 0 | 0 |
| 224226 | 1 | 0 | 0 | 0 | 0 |
| 224249 | 1 | 0 | 0 | 0 | 0 |

|        |   |   |   |   |   |
|--------|---|---|---|---|---|
| 226227 | 1 | 0 | 0 | 0 | 0 |
| 227228 | 1 | 0 | 0 | 0 | 0 |
| 227229 | 1 | 0 | 0 | 0 | 0 |
| 230231 | 1 | 0 | 0 | 0 | 0 |
| 230232 | 1 | 0 | 0 | 0 | 0 |
| 230247 | 1 | 0 | 0 | 0 | 0 |
| 233234 | 1 | 0 | 0 | 0 | 0 |
| 233235 | 1 | 0 | 0 | 0 | 0 |
| 233236 | 1 | 0 | 0 | 0 | 0 |
| 236237 | 1 | 0 | 0 | 0 | 0 |
| 236238 | 1 | 0 | 0 | 0 | 0 |
| 236239 | 1 | 0 | 0 | 0 | 0 |
| 240241 | 1 | 0 | 0 | 0 | 0 |
| 240242 | 1 | 0 | 0 | 0 | 0 |
| 240243 | 1 | 0 | 0 | 0 | 0 |
| 243244 | 1 | 0 | 0 | 0 | 0 |
| 243245 | 1 | 0 | 0 | 0 | 0 |
| 243246 | 1 | 0 | 0 | 0 | 0 |
| 246247 | 1 | 0 | 0 | 0 | 0 |
| 246248 | 2 | 0 | 0 | 0 | 0 |
| 249250 | 1 | 0 | 0 | 0 | 0 |
| 249254 | 1 | 0 | 0 | 0 | 0 |
| 250251 | 1 | 0 | 0 | 0 | 0 |
| 250252 | 1 | 0 | 0 | 0 | 0 |
| 250253 | 1 | 0 | 0 | 0 | 0 |
| 254255 | 1 | 0 | 0 | 0 | 0 |
| 254256 | 1 | 0 | 0 | 0 | 0 |
| 254257 | 1 | 0 | 0 | 0 | 0 |
| 258259 | 1 | 0 | 0 | 0 | 0 |
| 258260 | 1 | 0 | 0 | 0 | 0 |
| 260261 | 1 | 0 | 0 | 0 | 0 |
| 260262 | 1 | 0 | 0 | 0 | 0 |
| 260263 | 1 | 0 | 0 | 0 | 0 |
| 263264 | 1 | 0 | 0 | 0 | 0 |
| 263265 | 1 | 0 | 0 | 0 | 0 |
| 263269 | 1 | 0 | 0 | 0 | 0 |
| 265266 | 1 | 0 | 0 | 0 | 0 |
| 265267 | 1 | 0 | 0 | 0 | 0 |
| 265268 | 1 | 0 | 0 | 0 | 0 |
| 268305 | 1 | 0 | 0 | 0 | 0 |
| 269270 | 1 | 0 | 0 | 0 | 0 |
| 271272 | 1 | 0 | 0 | 0 | 0 |
| 271273 | 1 | 0 | 0 | 0 | 0 |
| 271274 | 1 | 0 | 0 | 0 | 0 |
| 271314 | 1 | 0 | 0 | 0 | 0 |
| 274275 | 1 | 0 | 0 | 0 | 0 |
| 275276 | 1 | 0 | 0 | 0 | 0 |
| 275283 | 2 | 0 | 0 | 0 | 0 |
| 276277 | 1 | 0 | 0 | 0 | 0 |
| 276278 | 1 | 0 | 0 | 0 | 0 |
| 276279 | 1 | 0 | 0 | 0 | 0 |
| 279280 | 1 | 0 | 0 | 0 | 0 |
| 279281 | 1 | 0 | 0 | 0 | 0 |
| 279282 | 1 | 0 | 0 | 0 | 0 |
| 284285 | 1 | 0 | 0 | 0 | 0 |
| 284292 | 1 | 0 | 0 | 0 | 0 |
| 284295 | 1 | 0 | 0 | 0 | 0 |
| 284298 | 1 | 0 | 0 | 0 | 0 |
| 285286 | 1 | 0 | 0 | 0 | 0 |
| 285287 | 1 | 0 | 0 | 0 | 0 |
| 285288 | 1 | 0 | 0 | 0 | 0 |
| 288289 | 1 | 0 | 0 | 0 | 0 |
| 289290 | 1 | 0 | 0 | 0 | 0 |
| 289291 | 1 | 0 | 0 | 0 | 0 |
| 289314 | 1 | 0 | 0 | 0 | 0 |
| 291292 | 1 | 0 | 0 | 0 | 0 |
| 292293 | 1 | 0 | 0 | 0 | 0 |
| 292294 | 1 | 0 | 0 | 0 | 0 |
| 295296 | 1 | 0 | 0 | 0 | 0 |
| 295297 | 1 | 0 | 0 | 0 | 0 |
| 295312 | 1 | 0 | 0 | 0 | 0 |
| 298299 | 1 | 0 | 0 | 0 | 0 |
| 298300 | 1 | 0 | 0 | 0 | 0 |
| 298301 | 1 | 0 | 0 | 0 | 0 |
| 301302 | 1 | 0 | 0 | 0 | 0 |
| 301303 | 1 | 0 | 0 | 0 | 0 |
| 301304 | 1 | 0 | 0 | 0 | 0 |
| 305306 | 1 | 0 | 0 | 0 | 0 |
| 305307 | 1 | 0 | 0 | 0 | 0 |
| 305308 | 1 | 0 | 0 | 0 | 0 |
| 308309 | 1 | 0 | 0 | 0 | 0 |

308310 1 0 0 0 0  
308311 1 0 0 0 0  
311312 1 0 0 0 0  
311313 2 0 0 0 0  
314315 1 0 0 0 0  
314319 1 0 0 0 0  
315316 1 0 0 0 0  
315317 1 0 0 0 0  
315318 1 0 0 0 0  
319320 1 0 0 0 0  
319321 1 0 0 0 0  
319322 1 0 0 0 0

M END  
> <NAME>  
O24\_1

\$\$\$\$  
U25\_1  
MOE2012 3D

```
317316 0 0 1 0 0 0 0 0999 V2000  
23.0620 -25.7420 10.1690 O 0 0 0 0 0 0 0 0 0 0 0 0 0 0 0  
22.3830 -26.6600 10.1970 H 0 0 0 0 0 0 0 0 0 0 0 0 0 0 0  
22.9320 -25.3880 8.7960 C 0 0 0 0 0 0 0 0 0 0 0 0 0 0 0  
23.9080 -25.5440 8.3230 H 0 0 0 0 0 0 0 0 0 0 0 0 0 0 0  
22.2060 -26.0620 8.3280 H 0 0 0 0 0 0 0 0 0 0 0 0 0 0 0  
22.4930 -23.9160 8.6690 C 0 0 0 0 0 0 0 0 0 0 0 0 0 0 0  
23.1930 -23.3070 9.2550 H 0 0 0 0 0 0 0 0 0 0 0 0 0 0 0  
21.0780 -23.7470 9.2680 C 0 0 0 0 0 0 0 0 0 0 0 0 0 0 0  
20.3100 -24.0890 8.5650 H 0 0 0 0 0 0 0 0 0 0 0 0 0 0 0  
20.9690 -24.3230 10.1920 H 0 0 0 0 0 0 0 0 0 0 0 0 0 0 0  
20.8240 -22.3830 9.5990 O 0 0 0 0 0 0 0 0 0 0 0 0 0 0 0  
19.9180 -22.3430 9.9520 H 0 0 0 0 0 0 0 0 0 0 0 0 0 0 0  
22.5910 -23.5410 7.2400 N 0 0 3 0 0 0 0 0 0 0 0 0 0 0 0  
23.5420 -23.7160 6.9140 H 0 0 0 0 0 0 0 0 0 0 0 0 0 0 0  
25.8640 -12.0740 14.5360 C 0 0 0 0 0 0 0 0 0 0 0 0 0 0 0  
26.2580 -11.4130 13.7540 H 0 0 0 0 0 0 0 0 0 0 0 0 0 0 0  
25.4380 -12.9360 14.0140 H 0 0 0 0 0 0 0 0 0 0 0 0 0 0 0  
26.9160 -12.5840 15.3680 O 0 0 0 0 0 0 0 0 0 0 0 0 0 0 0  
27.9140 -11.7070 15.6680 C 0 0 0 0 0 0 0 0 0 0 0 0 0 0 0  
29.0220 -12.4170 16.4040 C 0 0 0 0 0 0 0 0 0 0 0 0 0 0 0  
28.8700 -12.2110 17.4700 H 0 0 0 0 0 0 0 0 0 0 0 0 0 0 0  
28.9420 -13.5020 16.2720 H 0 0 0 0 0 0 0 0 0 0 0 0 0 0 0  
30.4080 -11.9230 15.9720 C 0 0 0 0 0 0 0 0 0 0 0 0 0 0 0  
31.0530 -12.0400 16.8540 H 0 0 0 0 0 0 0 0 0 0 0 0 0 0 0  
30.3920 -10.8510 15.7490 H 0 0 0 0 0 0 0 0 0 0 0 0 0 0 0  
27.9170 -10.5140 15.4000 O 0 0 0 0 0 0 0 0 0 0 0 0 0 0 0  
21.1930 -18.0250 7.2510 C 0 0 0 0 0 0 0 0 0 0 0 0 0 0 0  
21.3400 -17.8420 6.1790 H 0 0 0 0 0 0 0 0 0 0 0 0 0 0 0  
20.1110 -17.9840 7.4160 H 0 0 0 0 0 0 0 0 0 0 0 0 0 0 0  
22.2380 -22.1540 6.9300 C 0 0 0 0 0 0 0 0 0 0 0 0 0 0 0  
22.2940 -22.0450 5.8390 H 0 0 0 0 0 0 0 0 0 0 0 0 0 0 0  
21.1890 -21.9550 7.1710 H 0 0 0 0 0 0 0 0 0 0 0 0 0 0 0  
23.1650 -21.1250 7.5660 C 0 0 0 0 0 0 0 0 0 0 0 0 0 0 0  
23.1150 -21.1240 8.6590 H 0 0 0 0 0 0 0 0 0 0 0 0 0 0 0  
24.2090 -21.3250 7.2940 H 0 0 0 0 0 0 0 0 0 0 0 0 0 0 0  
22.8170 -19.7460 7.0830 C 0 0 0 0 0 0 0 0 0 0 0 0 0 0 0  
21.6330 -19.3410 7.6170 O 0 0 0 0 0 0 0 0 0 0 0 0 0 0 0  
23.5210 -19.0890 6.3290 O 0 0 0 0 0 0 0 0 0 0 0 0 0 0 0  
21.8860 -16.9660 8.0990 C 0 0 0 0 0 0 0 0 0 0 0 0 0 0 0  
21.7310 -17.1910 9.1600 H 0 0 0 0 0 0 0 0 0 0 0 0 0 0 0  
22.9650 -16.9760 7.9100 H 0 0 0 0 0 0 0 0 0 0 0 0 0 0 0  
21.3380 -15.6900 7.7790 O 0 0 0 0 0 0 0 0 0 0 0 0 0 0 0  
22.0600 -14.6010 8.3550 C 0 0 0 0 0 0 0 0 0 0 0 0 0 0 0  
23.1330 -14.7160 8.1640 H 0 0 0 0 0 0 0 0 0 0 0 0 0 0 0  
21.7340 -13.6970 7.8290 H 0 0 0 0 0 0 0 0 0 0 0 0 0 0 0  
21.7680 -14.4480 9.8460 C 0 0 0 0 0 0 0 0 0 0 0 0 0 0 0  
20.6840 -14.3700 10.0000 H 0 0 0 0 0 0 0 0 0 0 0 0 0 0 0  
22.0850 -15.3480 10.3840 H 0 0 0 0 0 0 0 0 0 0 0 0 0 0 0  
22.4790 -13.2280 10.4310 C 0 0 0 0 0 0 0 0 0 0 0 0 0 0 0  
23.5560 -13.3110 10.2400 H 0 0 0 0 0 0 0 0 0 0 0 0 0 0 0  
22.1300 -12.3180 9.9280 H 0 0 0 0 0 0 0 0 0 0 0 0 0 0 0  
22.2350 -13.1080 11.9370 C 0 0 0 0 0 0 0 0 0 0 0 0 0 0 0  
21.1650 -12.9670 12.1300 H 0 0 0 0 0 0 0 0 0 0 0 0 0 0 0  
22.5340 -14.0420 12.4290 H 0 0 0 0 0 0 0 0 0 0 0 0 0 0 0  
23.0260 -11.9460 12.5350 C 0 0 0 0 0 0 0 0 0 0 0 0 0 0 0  
24.0880 -12.0480 12.2830 H 0 0 0 0 0 0 0 0 0 0 0 0 0 0 0  
22.7070 -10.9970 12.0860 H 0 0 0 0 0 0 0 0 0 0 0 0 0 0 0  
22.8570 -11.8680 14.0500 C 0 0 0 0 0 0 0 0 0 0 0 0 0 0 0  
21.8300 -11.5700 14.2880 H 0 0 0 0 0 0 0 0 0 0 0 0 0 0 0  
23.0320 -12.8420 14.5230 H 0 0 0 0 0 0 0 0 0 0 0 0 0 0 0
```

|         |          |         |   |   |   |   |   |   |   |   |   |   |   |   |   |   |
|---------|----------|---------|---|---|---|---|---|---|---|---|---|---|---|---|---|---|
| 23.7250 | -10.8630 | 14.5720 | O | 0 | 0 | 0 | 0 | 0 | 0 | 0 | 0 | 0 | 0 | 0 | 0 | 0 |
| 24.7940 | -11.3740 | 15.3690 | C | 0 | 0 | 0 | 0 | 0 | 0 | 0 | 0 | 0 | 0 | 0 | 0 | 0 |
| 24.4050 | -12.0350 | 16.1520 | H | 0 | 0 | 0 | 0 | 0 | 0 | 0 | 0 | 0 | 0 | 0 | 0 | 0 |
| 25.2380 | -10.5210 | 15.8930 | H | 0 | 0 | 0 | 0 | 0 | 0 | 0 | 0 | 0 | 0 | 0 | 0 | 0 |
| 29.8740 | -14.1720 | 11.6410 | O | 0 | 0 | 0 | 0 | 0 | 0 | 0 | 0 | 0 | 0 | 0 | 0 | 0 |
| 30.2550 | -14.9000 | 11.1220 | H | 0 | 0 | 0 | 0 | 0 | 0 | 0 | 0 | 0 | 0 | 0 | 0 | 0 |
| 30.8200 | -13.8260 | 12.6480 | C | 0 | 0 | 0 | 0 | 0 | 0 | 0 | 0 | 0 | 0 | 0 | 0 | 0 |
| 31.0400 | -14.7410 | 13.2090 | H | 0 | 0 | 0 | 0 | 0 | 0 | 0 | 0 | 0 | 0 | 0 | 0 | 0 |
| 31.7350 | -13.4940 | 12.1470 | H | 0 | 0 | 0 | 0 | 0 | 0 | 0 | 0 | 0 | 0 | 0 | 0 | 0 |
| 30.2620 | -12.7360 | 13.6020 | C | 0 | 0 | 0 | 0 | 0 | 0 | 0 | 0 | 0 | 0 | 0 | 0 | 0 |
| 29.2490 | -13.0860 | 13.8350 | H | 0 | 0 | 0 | 0 | 0 | 0 | 0 | 0 | 0 | 0 | 0 | 0 | 0 |
| 30.1090 | -11.3870 | 12.8610 | C | 0 | 0 | 0 | 0 | 0 | 0 | 0 | 0 | 0 | 0 | 0 | 0 | 0 |
| 30.0290 | -10.5520 | 13.5610 | H | 0 | 0 | 0 | 0 | 0 | 0 | 0 | 0 | 0 | 0 | 0 | 0 | 0 |
| 30.9590 | -11.1990 | 12.1970 | H | 0 | 0 | 0 | 0 | 0 | 0 | 0 | 0 | 0 | 0 | 0 | 0 | 0 |
| 28.9180 | -11.3630 | 12.0770 | O | 0 | 0 | 0 | 0 | 0 | 0 | 0 | 0 | 0 | 0 | 0 | 0 | 0 |
| 28.8760 | -10.4860 | 11.6590 | H | 0 | 0 | 0 | 0 | 0 | 0 | 0 | 0 | 0 | 0 | 0 | 0 | 0 |
| 31.0260 | -12.6900 | 14.8750 | N | 0 | 0 | 3 | 0 | 0 | 0 | 0 | 0 | 0 | 0 | 0 | 0 | 0 |
| 36.4550 | 0.2370   | 8.9430  | C | 0 | 0 | 0 | 0 | 0 | 0 | 0 | 0 | 0 | 0 | 0 | 0 | 0 |
| 37.3790 | 0.3930   | 9.5130  | H | 0 | 0 | 0 | 0 | 0 | 0 | 0 | 0 | 0 | 0 | 0 | 0 | 0 |
| 35.9570 | -0.6230  | 9.4020  | H | 0 | 0 | 0 | 0 | 0 | 0 | 0 | 0 | 0 | 0 | 0 | 0 | 0 |
| 35.5570 | 1.3510   | 9.0780  | O | 0 | 0 | 0 | 0 | 0 | 0 | 0 | 0 | 0 | 0 | 0 | 0 | 0 |
| 36.1390 | 2.5820   | 9.1180  | C | 0 | 0 | 0 | 0 | 0 | 0 | 0 | 0 | 0 | 0 | 0 | 0 | 0 |
| 35.0930 | 3.6570   | 9.2600  | C | 0 | 0 | 0 | 0 | 0 | 0 | 0 | 0 | 0 | 0 | 0 | 0 | 0 |
| 35.1310 | 4.2570   | 8.3430  | H | 0 | 0 | 0 | 0 | 0 | 0 | 0 | 0 | 0 | 0 | 0 | 0 | 0 |
| 34.0960 | 3.2080   | 9.2890  | H | 0 | 0 | 0 | 0 | 0 | 0 | 0 | 0 | 0 | 0 | 0 | 0 | 0 |
| 35.3510 | 4.5490   | 10.4750 | C | 0 | 0 | 0 | 0 | 0 | 0 | 0 | 0 | 0 | 0 | 0 | 0 | 0 |
| 34.7880 | 5.4810   | 10.3500 | H | 0 | 0 | 0 | 0 | 0 | 0 | 0 | 0 | 0 | 0 | 0 | 0 | 0 |
| 36.4050 | 4.8560   | 10.4710 | H | 0 | 0 | 0 | 0 | 0 | 0 | 0 | 0 | 0 | 0 | 0 | 0 | 0 |
| 37.3380 | 2.8040   | 9.0190  | O | 0 | 0 | 0 | 0 | 0 | 0 | 0 | 0 | 0 | 0 | 0 | 0 | 0 |
| 36.1210 | -9.4970  | 13.5710 | C | 0 | 0 | 0 | 0 | 0 | 0 | 0 | 0 | 0 | 0 | 0 | 0 | 0 |
| 36.7490 | -9.6460  | 14.4570 | H | 0 | 0 | 0 | 0 | 0 | 0 | 0 | 0 | 0 | 0 | 0 | 0 | 0 |
| 36.4230 | -10.2240 | 12.8070 | H | 0 | 0 | 0 | 0 | 0 | 0 | 0 | 0 | 0 | 0 | 0 | 0 | 0 |
| 32.4770 | -12.4520 | 14.7660 | C | 0 | 0 | 0 | 0 | 0 | 0 | 0 | 0 | 0 | 0 | 0 | 0 | 0 |
| 32.9410 | -12.8630 | 15.6740 | H | 0 | 0 | 0 | 0 | 0 | 0 | 0 | 0 | 0 | 0 | 0 | 0 | 0 |
| 32.9060 | -13.0620 | 13.9630 | H | 0 | 0 | 0 | 0 | 0 | 0 | 0 | 0 | 0 | 0 | 0 | 0 | 0 |
| 32.9400 | -11.0000 | 14.6190 | C | 0 | 0 | 0 | 0 | 0 | 0 | 0 | 0 | 0 | 0 | 0 | 0 | 0 |
| 32.4400 | -10.5200 | 13.7750 | H | 0 | 0 | 0 | 0 | 0 | 0 | 0 | 0 | 0 | 0 | 0 | 0 | 0 |
| 32.7320 | -10.4270 | 15.5290 | H | 0 | 0 | 0 | 0 | 0 | 0 | 0 | 0 | 0 | 0 | 0 | 0 | 0 |
| 34.4260 | -10.9290 | 14.3600 | C | 0 | 0 | 0 | 0 | 0 | 0 | 0 | 0 | 0 | 0 | 0 | 0 | 0 |
| 34.7410 | -9.6820  | 13.9090 | O | 0 | 0 | 0 | 0 | 0 | 0 | 0 | 0 | 0 | 0 | 0 | 0 | 0 |
| 35.2190 | -11.8430 | 14.5330 | O | 0 | 0 | 0 | 0 | 0 | 0 | 0 | 0 | 0 | 0 | 0 | 0 | 0 |
| 36.3030 | -8.0820  | 13.0370 | C | 0 | 0 | 0 | 0 | 0 | 0 | 0 | 0 | 0 | 0 | 0 | 0 | 0 |
| 35.6360 | -7.9230  | 12.1830 | H | 0 | 0 | 0 | 0 | 0 | 0 | 0 | 0 | 0 | 0 | 0 | 0 | 0 |
| 36.0320 | -7.3570  | 13.8150 | H | 0 | 0 | 0 | 0 | 0 | 0 | 0 | 0 | 0 | 0 | 0 | 0 | 0 |
| 37.6610 | -7.9120  | 12.6440 | O | 0 | 0 | 0 | 0 | 0 | 0 | 0 | 0 | 0 | 0 | 0 | 0 | 0 |
| 38.0020 | -6.5660  | 12.3160 | C | 0 | 0 | 0 | 0 | 0 | 0 | 0 | 0 | 0 | 0 | 0 | 0 | 0 |
| 37.6770 | -5.8890  | 13.1150 | H | 0 | 0 | 0 | 0 | 0 | 0 | 0 | 0 | 0 | 0 | 0 | 0 | 0 |
| 39.0970 | -6.5230  | 12.2830 | H | 0 | 0 | 0 | 0 | 0 | 0 | 0 | 0 | 0 | 0 | 0 | 0 | 0 |
| 37.4380 | -6.1440  | 10.9610 | C | 0 | 0 | 0 | 0 | 0 | 0 | 0 | 0 | 0 | 0 | 0 | 0 | 0 |
| 37.7030 | -6.8930  | 10.2040 | H | 0 | 0 | 0 | 0 | 0 | 0 | 0 | 0 | 0 | 0 | 0 | 0 | 0 |
| 36.3430 | -6.1270  | 11.0020 | H | 0 | 0 | 0 | 0 | 0 | 0 | 0 | 0 | 0 | 0 | 0 | 0 | 0 |
| 37.9570 | -4.7670  | 10.5490 | C | 0 | 0 | 0 | 0 | 0 | 0 | 0 | 0 | 0 | 0 | 0 | 0 | 0 |
| 37.7230 | -4.0390  | 11.3360 | H | 0 | 0 | 0 | 0 | 0 | 0 | 0 | 0 | 0 | 0 | 0 | 0 | 0 |
| 39.0500 | -4.7990  | 10.4550 | H | 0 | 0 | 0 | 0 | 0 | 0 | 0 | 0 | 0 | 0 | 0 | 0 | 0 |
| 37.3410 | -4.3050  | 9.2280  | C | 0 | 0 | 0 | 0 | 0 | 0 | 0 | 0 | 0 | 0 | 0 | 0 | 0 |
| 37.5740 | -5.0260  | 8.4360  | H | 0 | 0 | 0 | 0 | 0 | 0 | 0 | 0 | 0 | 0 | 0 | 0 | 0 |
| 36.2490 | -4.2730  | 9.3270  | H | 0 | 0 | 0 | 0 | 0 | 0 | 0 | 0 | 0 | 0 | 0 | 0 | 0 |
| 37.8600 | -2.9230  | 8.8350  | C | 0 | 0 | 0 | 0 | 0 | 0 | 0 | 0 | 0 | 0 | 0 | 0 | 0 |
| 37.7020 | -2.2170  | 9.6580  | H | 0 | 0 | 0 | 0 | 0 | 0 | 0 | 0 | 0 | 0 | 0 | 0 | 0 |
| 38.9450 | -2.9560  | 8.6790  | H | 0 | 0 | 0 | 0 | 0 | 0 | 0 | 0 | 0 | 0 | 0 | 0 | 0 |
| 37.1860 | -2.4010  | 7.5690  | C | 0 | 0 | 0 | 0 | 0 | 0 | 0 | 0 | 0 | 0 | 0 | 0 | 0 |
| 37.4450 | -3.0470  | 6.7230  | H | 0 | 0 | 0 | 0 | 0 | 0 | 0 | 0 | 0 | 0 | 0 | 0 | 0 |
| 36.0940 | -2.4050  | 7.6640  | H | 0 | 0 | 0 | 0 | 0 | 0 | 0 | 0 | 0 | 0 | 0 | 0 | 0 |
| 37.6860 | -1.0970  | 7.2730  | O | 0 | 0 | 0 | 0 | 0 | 0 | 0 | 0 | 0 | 0 | 0 | 0 | 0 |
| 36.7450 | -0.0430  | 7.4700  | C | 0 | 0 | 0 | 0 | 0 | 0 | 0 | 0 | 0 | 0 | 0 | 0 | 0 |
| 35.8200 | -0.2500  | 6.9180  | H | 0 | 0 | 0 | 0 | 0 | 0 | 0 | 0 | 0 | 0 | 0 | 0 | 0 |
| 37.1710 | 0.8540   | 7.0070  | H | 0 | 0 | 0 | 0 | 0 | 0 | 0 | 0 | 0 | 0 | 0 | 0 | 0 |
| 31.2570 | 4.0610   | 12.0960 | O | 0 | 0 | 0 | 0 | 0 | 0 | 0 | 0 | 0 | 0 | 0 | 0 | 0 |
| 30.5720 | 3.6580   | 11.5370 | H | 0 | 0 | 0 | 0 | 0 | 0 | 0 | 0 | 0 | 0 | 0 | 0 | 0 |
| 32.5020 | 3.8680   | 11.4330 | C | 0 | 0 | 0 | 0 | 0 | 0 | 0 | 0 | 0 | 0 | 0 | 0 | 0 |
| 32.5880 | 2.8000   | 11.2000 | H | 0 | 0 | 0 | 0 | 0 | 0 | 0 | 0 | 0 | 0 | 0 | 0 | 0 |
| 32.4710 | 4.4300   | 10.4950 | H | 0 | 0 | 0 | 0 | 0 | 0 | 0 | 0 | 0 | 0 | 0 | 0 | 0 |
| 33.6880 | 4.3120   | 12.3210 | C | 0 | 0 | 0 | 0 | 0 | 0 | 0 | 0 | 0 | 0 | 0 | 0 | 0 |
| 33.5480 | 3.7600   | 13.2620 | H | 0 | 0 | 0 | 0 | 0 | 0 | 0 | 0 | 0 | 0 | 0 | 0 | 0 |
| 33.5870 | 5.8240   | 12.6570 | C | 0 | 0 | 0 | 0 | 0 | 0 | 0 | 0 | 0 | 0 | 0 | 0 | 0 |
| 34.5720 | 6.2780   | 12.8000 | H | 0 | 0 | 0 | 0 | 0 | 0 | 0 | 0 | 0 | 0 | 0 | 0 | 0 |
| 33.0780 | 6.3770   | 11.8610 | H | 0 | 0 | 0 | 0 | 0 | 0 | 0 | 0 | 0 | 0 | 0 | 0 | 0 |
| 32.8800 | 6.0160   | 13.8790 | O | 0 | 0 | 0 | 0 | 0 | 0 | 0 | 0 | 0 | 0 | 0 | 0 | 0 |
| 32.6740 | 6.9630   | 13.9500 | H | 0 | 0 | 0 | 0 | 0 | 0 | 0 | 0 | 0 | 0 | 0 | 0 | 0 |
| 34.9930 | 3.8760   | 11.7400 | N | 0 | 0 | 3 | 0 | 0 | 0 | 0 | 0 | 0 | 0 | 0 | 0 | 0 |
| 49.2280 | 8.4740   | 9.1350  | C | 0 | 0 | 0 | 0 | 0 | 0 | 0 | 0 | 0 | 0 | 0 | 0 | 0 |



|         |         |         |   |   |   |   |   |   |   |   |   |   |   |   |   |   |   |
|---------|---------|---------|---|---|---|---|---|---|---|---|---|---|---|---|---|---|---|
| 50.1810 | 13.0820 | 8.3060  | H | 0 | 0 | 0 | 0 | 0 | 0 | 0 | 0 | 0 | 0 | 0 | 0 | 0 | 0 |
| 51.9160 | 12.8910 | 8.0670  | H | 0 | 0 | 0 | 0 | 0 | 0 | 0 | 0 | 0 | 0 | 0 | 0 | 0 | 0 |
| 51.2110 | 14.8590 | 7.7540  | C | 0 | 0 | 0 | 0 | 0 | 0 | 0 | 0 | 0 | 0 | 0 | 0 | 0 | 0 |
| 50.0320 | 15.5000 | 7.5230  | O | 0 | 0 | 0 | 0 | 0 | 0 | 0 | 0 | 0 | 0 | 0 | 0 | 0 | 0 |
| 52.2840 | 15.4010 | 7.9800  | O | 0 | 0 | 0 | 0 | 0 | 0 | 0 | 0 | 0 | 0 | 0 | 0 | 0 | 0 |
| 50.0620 | 17.5280 | 8.8780  | C | 0 | 0 | 0 | 0 | 0 | 0 | 0 | 0 | 0 | 0 | 0 | 0 | 0 | 0 |
| 49.1810 | 17.1580 | 9.4140  | H | 0 | 0 | 0 | 0 | 0 | 0 | 0 | 0 | 0 | 0 | 0 | 0 | 0 | 0 |
| 50.9510 | 17.2200 | 9.4400  | H | 0 | 0 | 0 | 0 | 0 | 0 | 0 | 0 | 0 | 0 | 0 | 0 | 0 | 0 |
| 50.0110 | 18.9460 | 8.7630  | O | 0 | 0 | 0 | 0 | 0 | 0 | 0 | 0 | 0 | 0 | 0 | 0 | 0 | 0 |
| 50.2070 | 19.6250 | 10.0030 | C | 0 | 0 | 0 | 0 | 0 | 0 | 0 | 0 | 0 | 0 | 0 | 0 | 0 | 0 |
| 51.0980 | 19.2360 | 10.5100 | H | 0 | 0 | 0 | 0 | 0 | 0 | 0 | 0 | 0 | 0 | 0 | 0 | 0 | 0 |
| 50.4100 | 20.6720 | 9.7560  | H | 0 | 0 | 0 | 0 | 0 | 0 | 0 | 0 | 0 | 0 | 0 | 0 | 0 | 0 |
| 48.9740 | 19.5480 | 10.9010 | C | 0 | 0 | 0 | 0 | 0 | 0 | 0 | 0 | 0 | 0 | 0 | 0 | 0 | 0 |
| 48.0930 | 19.8850 | 10.3410 | H | 0 | 0 | 0 | 0 | 0 | 0 | 0 | 0 | 0 | 0 | 0 | 0 | 0 | 0 |
| 48.7770 | 18.5060 | 11.1780 | H | 0 | 0 | 0 | 0 | 0 | 0 | 0 | 0 | 0 | 0 | 0 | 0 | 0 | 0 |
| 49.1540 | 20.3870 | 12.1650 | C | 0 | 0 | 0 | 0 | 0 | 0 | 0 | 0 | 0 | 0 | 0 | 0 | 0 | 0 |
| 50.0550 | 20.0560 | 12.6970 | H | 0 | 0 | 0 | 0 | 0 | 0 | 0 | 0 | 0 | 0 | 0 | 0 | 0 | 0 |
| 49.3090 | 21.4380 | 11.8920 | H | 0 | 0 | 0 | 0 | 0 | 0 | 0 | 0 | 0 | 0 | 0 | 0 | 0 | 0 |
| 47.9430 | 20.2720 | 13.0930 | C | 0 | 0 | 0 | 0 | 0 | 0 | 0 | 0 | 0 | 0 | 0 | 0 | 0 | 0 |
| 47.0440 | 20.6280 | 12.5760 | H | 0 | 0 | 0 | 0 | 0 | 0 | 0 | 0 | 0 | 0 | 0 | 0 | 0 | 0 |
| 47.7760 | 19.2170 | 13.3450 | H | 0 | 0 | 0 | 0 | 0 | 0 | 0 | 0 | 0 | 0 | 0 | 0 | 0 | 0 |
| 48.1520 | 21.0750 | 14.3750 | C | 0 | 0 | 0 | 0 | 0 | 0 | 0 | 0 | 0 | 0 | 0 | 0 | 0 | 0 |
| 49.0840 | 20.7640 | 14.8620 | H | 0 | 0 | 0 | 0 | 0 | 0 | 0 | 0 | 0 | 0 | 0 | 0 | 0 | 0 |
| 48.2830 | 22.1390 | 14.1400 | H | 0 | 0 | 0 | 0 | 0 | 0 | 0 | 0 | 0 | 0 | 0 | 0 | 0 | 0 |
| 46.9830 | 20.9140 | 15.3420 | C | 0 | 0 | 0 | 0 | 0 | 0 | 0 | 0 | 0 | 0 | 0 | 0 | 0 | 0 |
| 46.0820 | 21.3540 | 14.9040 | H | 0 | 0 | 0 | 0 | 0 | 0 | 0 | 0 | 0 | 0 | 0 | 0 | 0 | 0 |
| 46.7690 | 19.8570 | 15.5400 | H | 0 | 0 | 0 | 0 | 0 | 0 | 0 | 0 | 0 | 0 | 0 | 0 | 0 | 0 |
| 47.2640 | 21.6310 | 16.5440 | O | 0 | 0 | 0 | 0 | 0 | 0 | 0 | 0 | 0 | 0 | 0 | 0 | 0 | 0 |
| 47.4860 | 20.8060 | 17.6860 | C | 0 | 0 | 0 | 0 | 0 | 0 | 0 | 0 | 0 | 0 | 0 | 0 | 0 | 0 |
| 46.6510 | 20.1070 | 17.8210 | H | 0 | 0 | 0 | 0 | 0 | 0 | 0 | 0 | 0 | 0 | 0 | 0 | 0 | 0 |
| 47.4680 | 21.4620 | 18.5620 | H | 0 | 0 | 0 | 0 | 0 | 0 | 0 | 0 | 0 | 0 | 0 | 0 | 0 | 0 |
| 49.8920 | 15.3820 | 23.6990 | O | 0 | 0 | 0 | 0 | 0 | 0 | 0 | 0 | 0 | 0 | 0 | 0 | 0 | 0 |
| 49.8300 | 14.5420 | 23.2060 | H | 0 | 0 | 0 | 0 | 0 | 0 | 0 | 0 | 0 | 0 | 0 | 0 | 0 | 0 |
| 48.9910 | 16.2930 | 23.0590 | C | 0 | 0 | 0 | 0 | 0 | 0 | 0 | 0 | 0 | 0 | 0 | 0 | 0 | 0 |
| 49.2550 | 16.3190 | 21.9990 | H | 0 | 0 | 0 | 0 | 0 | 0 | 0 | 0 | 0 | 0 | 0 | 0 | 0 | 0 |
| 47.9770 | 15.8890 | 23.1590 | H | 0 | 0 | 0 | 0 | 0 | 0 | 0 | 0 | 0 | 0 | 0 | 0 | 0 | 0 |
| 49.0900 | 17.6990 | 23.7140 | C | 0 | 0 | 0 | 0 | 0 | 0 | 0 | 0 | 0 | 0 | 0 | 0 | 0 | 0 |
| 50.1130 | 18.0610 | 23.5520 | H | 0 | 0 | 0 | 0 | 0 | 0 | 0 | 0 | 0 | 0 | 0 | 0 | 0 | 0 |
| 48.9440 | 17.5230 | 25.2530 | C | 0 | 0 | 0 | 0 | 0 | 0 | 0 | 0 | 0 | 0 | 0 | 0 | 0 | 0 |
| 49.0220 | 18.4750 | 25.7830 | H | 0 | 0 | 0 | 0 | 0 | 0 | 0 | 0 | 0 | 0 | 0 | 0 | 0 | 0 |
| 47.9820 | 17.0660 | 25.5080 | H | 0 | 0 | 0 | 0 | 0 | 0 | 0 | 0 | 0 | 0 | 0 | 0 | 0 | 0 |
| 49.9840 | 16.6980 | 25.7840 | O | 0 | 0 | 0 | 0 | 0 | 0 | 0 | 0 | 0 | 0 | 0 | 0 | 0 | 0 |
| 50.1140 | 15.9690 | 25.1260 | H | 0 | 0 | 0 | 0 | 0 | 0 | 0 | 0 | 0 | 0 | 0 | 0 | 0 | 0 |
| 48.1110 | 18.6310 | 23.1110 | N | 0 | 0 | 3 | 0 | 0 | 0 | 0 | 0 | 0 | 0 | 0 | 0 | 0 | 0 |
| 35.9340 | 24.8300 | 22.0710 | C | 0 | 0 | 0 | 0 | 0 | 0 | 0 | 0 | 0 | 0 | 0 | 0 | 0 | 0 |
| 35.5980 | 24.1930 | 22.8990 | H | 0 | 0 | 0 | 0 | 0 | 0 | 0 | 0 | 0 | 0 | 0 | 0 | 0 | 0 |
| 36.7810 | 24.3070 | 21.6180 | H | 0 | 0 | 0 | 0 | 0 | 0 | 0 | 0 | 0 | 0 | 0 | 0 | 0 | 0 |
| 34.9240 | 24.9440 | 21.0560 | O | 0 | 0 | 0 | 0 | 0 | 0 | 0 | 0 | 0 | 0 | 0 | 0 | 0 | 0 |
| 33.6390 | 25.0610 | 21.4990 | C | 0 | 0 | 0 | 0 | 0 | 0 | 0 | 0 | 0 | 0 | 0 | 0 | 0 | 0 |
| 32.7100 | 25.1470 | 20.3120 | C | 0 | 0 | 0 | 0 | 0 | 0 | 0 | 0 | 0 | 0 | 0 | 0 | 0 | 0 |
| 32.9930 | 26.0180 | 19.7120 | H | 0 | 0 | 0 | 0 | 0 | 0 | 0 | 0 | 0 | 0 | 0 | 0 | 0 | 0 |
| 32.8340 | 24.2410 | 19.7090 | H | 0 | 0 | 0 | 0 | 0 | 0 | 0 | 0 | 0 | 0 | 0 | 0 | 0 | 0 |
| 31.2570 | 25.2760 | 20.7320 | C | 0 | 0 | 0 | 0 | 0 | 0 | 0 | 0 | 0 | 0 | 0 | 0 | 0 | 0 |
| 30.9420 | 24.4150 | 21.3320 | H | 0 | 0 | 0 | 0 | 0 | 0 | 0 | 0 | 0 | 0 | 0 | 0 | 0 | 0 |
| 30.6090 | 25.3360 | 19.8520 | H | 0 | 0 | 0 | 0 | 0 | 0 | 0 | 0 | 0 | 0 | 0 | 0 | 0 | 0 |
| 31.1000 | 26.1780 | 21.3340 | H | 0 | 0 | 0 | 0 | 0 | 0 | 0 | 0 | 0 | 0 | 0 | 0 | 0 | 0 |
| 33.2960 | 25.0960 | 22.6720 | O | 0 | 0 | 0 | 0 | 0 | 0 | 0 | 0 | 0 | 0 | 0 | 0 | 0 | 0 |
| 47.7940 | 24.2810 | 24.3410 | C | 0 | 0 | 0 | 0 | 0 | 0 | 0 | 0 | 0 | 0 | 0 | 0 | 0 | 0 |
| 48.3880 | 24.5730 | 25.2160 | H | 0 | 0 | 0 | 0 | 0 | 0 | 0 | 0 | 0 | 0 | 0 | 0 | 0 | 0 |
| 47.9720 | 25.0560 | 23.5880 | H | 0 | 0 | 0 | 0 | 0 | 0 | 0 | 0 | 0 | 0 | 0 | 0 | 0 | 0 |
| 47.8670 | 19.8890 | 23.8340 | C | 0 | 0 | 0 | 0 | 0 | 0 | 0 | 0 | 0 | 0 | 0 | 0 | 0 | 0 |
| 47.0370 | 20.4200 | 23.3470 | H | 0 | 0 | 0 | 0 | 0 | 0 | 0 | 0 | 0 | 0 | 0 | 0 | 0 | 0 |
| 47.4580 | 19.6650 | 24.8270 | H | 0 | 0 | 0 | 0 | 0 | 0 | 0 | 0 | 0 | 0 | 0 | 0 | 0 | 0 |
| 49.0520 | 20.8400 | 23.9670 | C | 0 | 0 | 0 | 0 | 0 | 0 | 0 | 0 | 0 | 0 | 0 | 0 | 0 | 0 |
| 49.8820 | 20.3970 | 24.5270 | H | 0 | 0 | 0 | 0 | 0 | 0 | 0 | 0 | 0 | 0 | 0 | 0 | 0 | 0 |
| 49.4490 | 21.1430 | 22.9950 | H | 0 | 0 | 0 | 0 | 0 | 0 | 0 | 0 | 0 | 0 | 0 | 0 | 0 | 0 |
| 48.6040 | 22.0790 | 24.6910 | C | 0 | 0 | 0 | 0 | 0 | 0 | 0 | 0 | 0 | 0 | 0 | 0 | 0 | 0 |
| 48.2510 | 23.0370 | 23.7910 | O | 0 | 0 | 0 | 0 | 0 | 0 | 0 | 0 | 0 | 0 | 0 | 0 | 0 | 0 |
| 48.5320 | 22.1750 | 25.9070 | O | 0 | 0 | 0 | 0 | 0 | 0 | 0 | 0 | 0 | 0 | 0 | 0 | 0 | 0 |
| 46.3080 | 24.2160 | 24.6720 | C | 0 | 0 | 0 | 0 | 0 | 0 | 0 | 0 | 0 | 0 | 0 | 0 | 0 | 0 |
| 45.7480 | 23.9190 | 23.7800 | H | 0 | 0 | 0 | 0 | 0 | 0 | 0 | 0 | 0 | 0 | 0 | 0 | 0 | 0 |
| 46.1260 | 23.4640 | 25.4480 | H | 0 | 0 | 0 | 0 | 0 | 0 | 0 | 0 | 0 | 0 | 0 | 0 | 0 | 0 |
| 45.8870 | 25.5000 | 25.1240 | O | 0 | 0 | 0 | 0 | 0 | 0 | 0 | 0 | 0 | 0 | 0 | 0 | 0 | 0 |
| 44.5310 | 25.5340 | 25.5700 | C | 0 | 0 | 0 | 0 | 0 | 0 | 0 | 0 | 0 | 0 | 0 | 0 | 0 | 0 |
| 44.3260 | 24.6820 | 26.2290 | H | 0 | 0 | 0 | 0 | 0 | 0 | 0 | 0 | 0 | 0 | 0 | 0 | 0 | 0 |
| 44.4240 | 26.4420 | 26.1740 | H | 0 | 0 | 0 | 0 | 0 | 0 | 0 | 0 | 0 | 0 | 0 | 0 | 0 | 0 |
| 43.5500 | 25.5880 | 24.3990 | C | 0 | 0 | 0 | 0 | 0 | 0 | 0 | 0 | 0 | 0 | 0 | 0 | 0 | 0 |
| 43.8220 | 26.4190 | 23.7370 | H | 0 | 0 | 0 | 0 | 0 | 0 | 0 | 0 | 0 | 0 | 0 | 0 | 0 | 0 |
| 43.6370 | 24.6780 | 23.7940 | H | 0 | 0 | 0 | 0 | 0 | 0 | 0 | 0 | 0 | 0 | 0 | 0 | 0 | 0 |
| 42.1060 | 25.7440 | 24.8810 | C | 0 | 0 | 0 | 0 | 0 | 0 | 0 | 0 | 0 | 0 | 0 | 0 | 0 | 0 |
| 41.8490 | 24.9070 | 25.5420 | H | 0 | 0 | 0 | 0 | 0 | 0 | 0 | 0 | 0 | 0 | 0 | 0 | 0 | 0 |

|         |         |         |   |   |   |   |   |   |   |   |   |   |   |   |   |
|---------|---------|---------|---|---|---|---|---|---|---|---|---|---|---|---|---|
| 42.0140 | 26.6630 | 25.4730 | H | 0 | 0 | 0 | 0 | 0 | 0 | 0 | 0 | 0 | 0 | 0 | 0 |
| 41.1230 | 25.7900 | 23.7080 | C | 0 | 0 | 0 | 0 | 0 | 0 | 0 | 0 | 0 | 0 | 0 | 0 |
| 41.3770 | 26.6300 | 23.0500 | H | 0 | 0 | 0 | 0 | 0 | 0 | 0 | 0 | 0 | 0 | 0 | 0 |
| 41.2180 | 24.8740 | 23.1130 | H | 0 | 0 | 0 | 0 | 0 | 0 | 0 | 0 | 0 | 0 | 0 | 0 |
| 39.6810 | 25.9360 | 24.1920 | C | 0 | 0 | 0 | 0 | 0 | 0 | 0 | 0 | 0 | 0 | 0 | 0 |
| 39.4180 | 25.1040 | 24.8570 | H | 0 | 0 | 0 | 0 | 0 | 0 | 0 | 0 | 0 | 0 | 0 | 0 |
| 39.5740 | 26.8470 | 24.7960 | H | 0 | 0 | 0 | 0 | 0 | 0 | 0 | 0 | 0 | 0 | 0 | 0 |
| 38.6920 | 25.9830 | 23.0310 | C | 0 | 0 | 0 | 0 | 0 | 0 | 0 | 0 | 0 | 0 | 0 | 0 |
| 38.9130 | 26.8400 | 22.3830 | H | 0 | 0 | 0 | 0 | 0 | 0 | 0 | 0 | 0 | 0 | 0 | 0 |
| 38.7620 | 25.0630 | 22.4420 | H | 0 | 0 | 0 | 0 | 0 | 0 | 0 | 0 | 0 | 0 | 0 | 0 |
| 37.3760 | 26.1210 | 23.5690 | O | 0 | 0 | 0 | 0 | 0 | 0 | 0 | 0 | 0 | 0 | 0 | 0 |
| 36.3620 | 26.2080 | 22.5690 | C | 0 | 0 | 0 | 0 | 0 | 0 | 0 | 0 | 0 | 0 | 0 | 0 |
| 36.6810 | 26.8490 | 21.7380 | H | 0 | 0 | 0 | 0 | 0 | 0 | 0 | 0 | 0 | 0 | 0 | 0 |
| 35.5040 | 26.7130 | 23.0250 | H | 0 | 0 | 0 | 0 | 0 | 0 | 0 | 0 | 0 | 0 | 0 | 0 |

|    |    |   |   |   |   |   |
|----|----|---|---|---|---|---|
| 1  | 2  | 1 | 0 | 0 | 0 | 0 |
| 1  | 3  | 1 | 0 | 0 | 0 | 0 |
| 3  | 4  | 1 | 0 | 0 | 0 | 0 |
| 3  | 5  | 1 | 0 | 0 | 0 | 0 |
| 3  | 6  | 1 | 0 | 0 | 0 | 0 |
| 6  | 7  | 1 | 0 | 0 | 0 | 0 |
| 6  | 8  | 1 | 0 | 0 | 0 | 0 |
| 6  | 13 | 1 | 0 | 0 | 0 | 0 |
| 8  | 9  | 1 | 0 | 0 | 0 | 0 |
| 8  | 10 | 1 | 0 | 0 | 0 | 0 |
| 8  | 11 | 1 | 0 | 0 | 0 | 0 |
| 11 | 12 | 1 | 0 | 0 | 0 | 0 |
| 13 | 14 | 1 | 0 | 0 | 0 | 0 |
| 13 | 30 | 1 | 0 | 0 | 0 | 0 |
| 15 | 16 | 1 | 0 | 0 | 0 | 0 |
| 15 | 17 | 1 | 0 | 0 | 0 | 0 |
| 15 | 18 | 1 | 0 | 0 | 0 | 0 |
| 15 | 62 | 1 | 0 | 0 | 0 | 0 |
| 18 | 19 | 1 | 0 | 0 | 0 | 0 |
| 19 | 20 | 1 | 0 | 0 | 0 | 0 |
| 19 | 26 | 2 | 0 | 0 | 0 | 0 |
| 20 | 21 | 1 | 0 | 0 | 0 | 0 |
| 20 | 22 | 1 | 0 | 0 | 0 | 0 |
| 20 | 23 | 1 | 0 | 0 | 0 | 0 |
| 23 | 24 | 1 | 0 | 0 | 0 | 0 |
| 23 | 25 | 1 | 0 | 0 | 0 | 0 |
| 23 | 77 | 1 | 0 | 0 | 0 | 0 |
| 27 | 28 | 1 | 0 | 0 | 0 | 0 |
| 27 | 29 | 1 | 0 | 0 | 0 | 0 |
| 27 | 37 | 1 | 0 | 0 | 0 | 0 |
| 27 | 39 | 1 | 0 | 0 | 0 | 0 |
| 30 | 31 | 1 | 0 | 0 | 0 | 0 |
| 30 | 32 | 1 | 0 | 0 | 0 | 0 |
| 30 | 33 | 1 | 0 | 0 | 0 | 0 |
| 33 | 34 | 1 | 0 | 0 | 0 | 0 |
| 33 | 35 | 1 | 0 | 0 | 0 | 0 |
| 33 | 36 | 1 | 0 | 0 | 0 | 0 |
| 36 | 37 | 1 | 0 | 0 | 0 | 0 |
| 36 | 38 | 2 | 0 | 0 | 0 | 0 |
| 39 | 40 | 1 | 0 | 0 | 0 | 0 |
| 39 | 41 | 1 | 0 | 0 | 0 | 0 |
| 39 | 42 | 1 | 0 | 0 | 0 | 0 |
| 42 | 43 | 1 | 0 | 0 | 0 | 0 |
| 43 | 44 | 1 | 0 | 0 | 0 | 0 |
| 43 | 45 | 1 | 0 | 0 | 0 | 0 |
| 43 | 46 | 1 | 0 | 0 | 0 | 0 |
| 46 | 47 | 1 | 0 | 0 | 0 | 0 |
| 46 | 48 | 1 | 0 | 0 | 0 | 0 |
| 46 | 49 | 1 | 0 | 0 | 0 | 0 |
| 49 | 50 | 1 | 0 | 0 | 0 | 0 |
| 49 | 51 | 1 | 0 | 0 | 0 | 0 |
| 49 | 52 | 1 | 0 | 0 | 0 | 0 |
| 52 | 53 | 1 | 0 | 0 | 0 | 0 |
| 52 | 54 | 1 | 0 | 0 | 0 | 0 |
| 52 | 55 | 1 | 0 | 0 | 0 | 0 |
| 55 | 56 | 1 | 0 | 0 | 0 | 0 |
| 55 | 57 | 1 | 0 | 0 | 0 | 0 |
| 55 | 58 | 1 | 0 | 0 | 0 | 0 |
| 58 | 59 | 1 | 0 | 0 | 0 | 0 |
| 58 | 60 | 1 | 0 | 0 | 0 | 0 |
| 58 | 61 | 1 | 0 | 0 | 0 | 0 |
| 61 | 62 | 1 | 0 | 0 | 0 | 0 |
| 62 | 63 | 1 | 0 | 0 | 0 | 0 |
| 62 | 64 | 1 | 0 | 0 | 0 | 0 |
| 65 | 66 | 1 | 0 | 0 | 0 | 0 |
| 65 | 67 | 1 | 0 | 0 | 0 | 0 |
| 67 | 68 | 1 | 0 | 0 | 0 | 0 |

|     |     |   |   |   |   |   |
|-----|-----|---|---|---|---|---|
| 67  | 69  | 1 | 0 | 0 | 0 | 0 |
| 67  | 70  | 1 | 0 | 0 | 0 | 0 |
| 70  | 71  | 1 | 0 | 0 | 0 | 0 |
| 70  | 72  | 1 | 0 | 0 | 0 | 0 |
| 70  | 77  | 1 | 0 | 0 | 0 | 0 |
| 72  | 73  | 1 | 0 | 0 | 0 | 0 |
| 72  | 74  | 1 | 0 | 0 | 0 | 0 |
| 72  | 75  | 1 | 0 | 0 | 0 | 0 |
| 75  | 76  | 1 | 0 | 0 | 0 | 0 |
| 77  | 93  | 1 | 0 | 0 | 0 | 0 |
| 78  | 79  | 1 | 0 | 0 | 0 | 0 |
| 78  | 80  | 1 | 0 | 0 | 0 | 0 |
| 78  | 81  | 1 | 0 | 0 | 0 | 0 |
| 78  | 125 | 1 | 0 | 0 | 0 | 0 |
| 81  | 82  | 1 | 0 | 0 | 0 | 0 |
| 82  | 83  | 1 | 0 | 0 | 0 | 0 |
| 82  | 89  | 2 | 0 | 0 | 0 | 0 |
| 83  | 84  | 1 | 0 | 0 | 0 | 0 |
| 83  | 85  | 1 | 0 | 0 | 0 | 0 |
| 83  | 86  | 1 | 0 | 0 | 0 | 0 |
| 86  | 87  | 1 | 0 | 0 | 0 | 0 |
| 86  | 88  | 1 | 0 | 0 | 0 | 0 |
| 86  | 140 | 1 | 0 | 0 | 0 | 0 |
| 90  | 91  | 1 | 0 | 0 | 0 | 0 |
| 90  | 92  | 1 | 0 | 0 | 0 | 0 |
| 90  | 100 | 1 | 0 | 0 | 0 | 0 |
| 90  | 102 | 1 | 0 | 0 | 0 | 0 |
| 93  | 94  | 1 | 0 | 0 | 0 | 0 |
| 93  | 95  | 1 | 0 | 0 | 0 | 0 |
| 93  | 96  | 1 | 0 | 0 | 0 | 0 |
| 96  | 97  | 1 | 0 | 0 | 0 | 0 |
| 96  | 98  | 1 | 0 | 0 | 0 | 0 |
| 96  | 99  | 1 | 0 | 0 | 0 | 0 |
| 99  | 100 | 1 | 0 | 0 | 0 | 0 |
| 99  | 101 | 2 | 0 | 0 | 0 | 0 |
| 102 | 103 | 1 | 0 | 0 | 0 | 0 |
| 102 | 104 | 1 | 0 | 0 | 0 | 0 |
| 102 | 105 | 1 | 0 | 0 | 0 | 0 |
| 105 | 106 | 1 | 0 | 0 | 0 | 0 |
| 106 | 107 | 1 | 0 | 0 | 0 | 0 |
| 106 | 108 | 1 | 0 | 0 | 0 | 0 |
| 106 | 109 | 1 | 0 | 0 | 0 | 0 |
| 109 | 110 | 1 | 0 | 0 | 0 | 0 |
| 109 | 111 | 1 | 0 | 0 | 0 | 0 |
| 109 | 112 | 1 | 0 | 0 | 0 | 0 |
| 112 | 113 | 1 | 0 | 0 | 0 | 0 |
| 112 | 114 | 1 | 0 | 0 | 0 | 0 |
| 112 | 115 | 1 | 0 | 0 | 0 | 0 |
| 115 | 116 | 1 | 0 | 0 | 0 | 0 |
| 115 | 117 | 1 | 0 | 0 | 0 | 0 |
| 115 | 118 | 1 | 0 | 0 | 0 | 0 |
| 118 | 119 | 1 | 0 | 0 | 0 | 0 |
| 118 | 120 | 1 | 0 | 0 | 0 | 0 |
| 118 | 121 | 1 | 0 | 0 | 0 | 0 |
| 121 | 122 | 1 | 0 | 0 | 0 | 0 |
| 121 | 123 | 1 | 0 | 0 | 0 | 0 |
| 121 | 124 | 1 | 0 | 0 | 0 | 0 |
| 124 | 125 | 1 | 0 | 0 | 0 | 0 |
| 125 | 126 | 1 | 0 | 0 | 0 | 0 |
| 125 | 127 | 1 | 0 | 0 | 0 | 0 |
| 128 | 129 | 1 | 0 | 0 | 0 | 0 |
| 128 | 130 | 1 | 0 | 0 | 0 | 0 |
| 130 | 131 | 1 | 0 | 0 | 0 | 0 |
| 130 | 132 | 1 | 0 | 0 | 0 | 0 |
| 130 | 133 | 1 | 0 | 0 | 0 | 0 |
| 133 | 134 | 1 | 0 | 0 | 0 | 0 |
| 133 | 135 | 1 | 0 | 0 | 0 | 0 |
| 133 | 140 | 1 | 0 | 0 | 0 | 0 |
| 135 | 136 | 1 | 0 | 0 | 0 | 0 |
| 135 | 137 | 1 | 0 | 0 | 0 | 0 |
| 135 | 138 | 1 | 0 | 0 | 0 | 0 |
| 138 | 139 | 1 | 0 | 0 | 0 | 0 |
| 140 | 156 | 1 | 0 | 0 | 0 | 0 |
| 141 | 142 | 1 | 0 | 0 | 0 | 0 |
| 141 | 143 | 1 | 0 | 0 | 0 | 0 |
| 141 | 144 | 1 | 0 | 0 | 0 | 0 |
| 141 | 188 | 1 | 0 | 0 | 0 | 0 |
| 144 | 145 | 1 | 0 | 0 | 0 | 0 |
| 145 | 146 | 1 | 0 | 0 | 0 | 0 |
| 145 | 152 | 2 | 0 | 0 | 0 | 0 |
| 146 | 147 | 1 | 0 | 0 | 0 | 0 |



|        |   |   |   |   |   |
|--------|---|---|---|---|---|
| 146148 | 1 | 0 | 0 | 0 | 0 |
| 146149 | 1 | 0 | 0 | 0 | 0 |
| 149150 | 1 | 0 | 0 | 0 | 0 |
| 149151 | 1 | 0 | 0 | 0 | 0 |
| 149203 | 1 | 0 | 0 | 0 | 0 |
| 153154 | 1 | 0 | 0 | 0 | 0 |
| 153155 | 1 | 0 | 0 | 0 | 0 |
| 153163 | 1 | 0 | 0 | 0 | 0 |
| 153165 | 1 | 0 | 0 | 0 | 0 |
| 156157 | 1 | 0 | 0 | 0 | 0 |
| 156158 | 1 | 0 | 0 | 0 | 0 |
| 156159 | 1 | 0 | 0 | 0 | 0 |
| 159160 | 1 | 0 | 0 | 0 | 0 |
| 159161 | 1 | 0 | 0 | 0 | 0 |
| 159162 | 1 | 0 | 0 | 0 | 0 |
| 162163 | 1 | 0 | 0 | 0 | 0 |
| 162164 | 2 | 0 | 0 | 0 | 0 |
| 165166 | 1 | 0 | 0 | 0 | 0 |
| 165167 | 1 | 0 | 0 | 0 | 0 |
| 165168 | 1 | 0 | 0 | 0 | 0 |
| 168169 | 1 | 0 | 0 | 0 | 0 |
| 169170 | 1 | 0 | 0 | 0 | 0 |
| 169171 | 1 | 0 | 0 | 0 | 0 |
| 169172 | 1 | 0 | 0 | 0 | 0 |
| 172173 | 1 | 0 | 0 | 0 | 0 |
| 172174 | 1 | 0 | 0 | 0 | 0 |
| 172175 | 1 | 0 | 0 | 0 | 0 |
| 175176 | 1 | 0 | 0 | 0 | 0 |
| 175177 | 1 | 0 | 0 | 0 | 0 |
| 175178 | 1 | 0 | 0 | 0 | 0 |
| 178179 | 1 | 0 | 0 | 0 | 0 |
| 178180 | 1 | 0 | 0 | 0 | 0 |
| 178181 | 1 | 0 | 0 | 0 | 0 |
| 181182 | 1 | 0 | 0 | 0 | 0 |
| 181183 | 1 | 0 | 0 | 0 | 0 |
| 181184 | 1 | 0 | 0 | 0 | 0 |
| 184185 | 1 | 0 | 0 | 0 | 0 |
| 184186 | 1 | 0 | 0 | 0 | 0 |
| 184187 | 1 | 0 | 0 | 0 | 0 |
| 187188 | 1 | 0 | 0 | 0 | 0 |
| 188189 | 1 | 0 | 0 | 0 | 0 |
| 188190 | 1 | 0 | 0 | 0 | 0 |
| 191192 | 1 | 0 | 0 | 0 | 0 |
| 191193 | 1 | 0 | 0 | 0 | 0 |
| 193194 | 1 | 0 | 0 | 0 | 0 |
| 193195 | 1 | 0 | 0 | 0 | 0 |
| 193196 | 1 | 0 | 0 | 0 | 0 |
| 196197 | 1 | 0 | 0 | 0 | 0 |
| 196198 | 1 | 0 | 0 | 0 | 0 |
| 196203 | 1 | 0 | 0 | 0 | 0 |
| 198199 | 1 | 0 | 0 | 0 | 0 |
| 198200 | 1 | 0 | 0 | 0 | 0 |
| 198201 | 1 | 0 | 0 | 0 | 0 |
| 201202 | 1 | 0 | 0 | 0 | 0 |
| 203219 | 1 | 0 | 0 | 0 | 0 |
| 204205 | 1 | 0 | 0 | 0 | 0 |
| 204206 | 1 | 0 | 0 | 0 | 0 |
| 204207 | 1 | 0 | 0 | 0 | 0 |
| 204251 | 1 | 0 | 0 | 0 | 0 |
| 207208 | 1 | 0 | 0 | 0 | 0 |
| 208209 | 1 | 0 | 0 | 0 | 0 |
| 208215 | 2 | 0 | 0 | 0 | 0 |
| 209210 | 1 | 0 | 0 | 0 | 0 |
| 209211 | 1 | 0 | 0 | 0 | 0 |
| 209212 | 1 | 0 | 0 | 0 | 0 |
| 212213 | 1 | 0 | 0 | 0 | 0 |
| 212214 | 1 | 0 | 0 | 0 | 0 |
| 212266 | 1 | 0 | 0 | 0 | 0 |
| 216217 | 1 | 0 | 0 | 0 | 0 |
| 216218 | 1 | 0 | 0 | 0 | 0 |
| 216226 | 1 | 0 | 0 | 0 | 0 |
| 216228 | 1 | 0 | 0 | 0 | 0 |
| 219220 | 1 | 0 | 0 | 0 | 0 |
| 219221 | 1 | 0 | 0 | 0 | 0 |
| 219222 | 1 | 0 | 0 | 0 | 0 |
| 222223 | 1 | 0 | 0 | 0 | 0 |
| 222224 | 1 | 0 | 0 | 0 | 0 |
| 222225 | 1 | 0 | 0 | 0 | 0 |
| 225226 | 1 | 0 | 0 | 0 | 0 |
| 225227 | 2 | 0 | 0 | 0 | 0 |
| 228229 | 1 | 0 | 0 | 0 | 0 |

|        |   |   |   |   |   |
|--------|---|---|---|---|---|
| 228230 | 1 | 0 | 0 | 0 | 0 |
| 228231 | 1 | 0 | 0 | 0 | 0 |
| 231232 | 1 | 0 | 0 | 0 | 0 |
| 232233 | 1 | 0 | 0 | 0 | 0 |
| 232234 | 1 | 0 | 0 | 0 | 0 |
| 232235 | 1 | 0 | 0 | 0 | 0 |
| 235236 | 1 | 0 | 0 | 0 | 0 |
| 235237 | 1 | 0 | 0 | 0 | 0 |
| 235238 | 1 | 0 | 0 | 0 | 0 |
| 238239 | 1 | 0 | 0 | 0 | 0 |
| 238240 | 1 | 0 | 0 | 0 | 0 |
| 238241 | 1 | 0 | 0 | 0 | 0 |
| 241242 | 1 | 0 | 0 | 0 | 0 |
| 241243 | 1 | 0 | 0 | 0 | 0 |
| 241244 | 1 | 0 | 0 | 0 | 0 |
| 244245 | 1 | 0 | 0 | 0 | 0 |
| 244246 | 1 | 0 | 0 | 0 | 0 |
| 244247 | 1 | 0 | 0 | 0 | 0 |
| 247248 | 1 | 0 | 0 | 0 | 0 |
| 247249 | 1 | 0 | 0 | 0 | 0 |
| 247250 | 1 | 0 | 0 | 0 | 0 |
| 250251 | 1 | 0 | 0 | 0 | 0 |
| 251252 | 1 | 0 | 0 | 0 | 0 |
| 251253 | 1 | 0 | 0 | 0 | 0 |
| 254255 | 1 | 0 | 0 | 0 | 0 |
| 254256 | 1 | 0 | 0 | 0 | 0 |
| 256257 | 1 | 0 | 0 | 0 | 0 |
| 256258 | 1 | 0 | 0 | 0 | 0 |
| 256259 | 1 | 0 | 0 | 0 | 0 |
| 259260 | 1 | 0 | 0 | 0 | 0 |
| 259261 | 1 | 0 | 0 | 0 | 0 |
| 259266 | 1 | 0 | 0 | 0 | 0 |
| 261262 | 1 | 0 | 0 | 0 | 0 |
| 261263 | 1 | 0 | 0 | 0 | 0 |
| 261264 | 1 | 0 | 0 | 0 | 0 |
| 264265 | 1 | 0 | 0 | 0 | 0 |
| 266283 | 1 | 0 | 0 | 0 | 0 |
| 267268 | 1 | 0 | 0 | 0 | 0 |
| 267269 | 1 | 0 | 0 | 0 | 0 |
| 267270 | 1 | 0 | 0 | 0 | 0 |
| 267315 | 1 | 0 | 0 | 0 | 0 |
| 270271 | 1 | 0 | 0 | 0 | 0 |
| 271272 | 1 | 0 | 0 | 0 | 0 |
| 271279 | 2 | 0 | 0 | 0 | 0 |
| 272273 | 1 | 0 | 0 | 0 | 0 |
| 272274 | 1 | 0 | 0 | 0 | 0 |
| 272275 | 1 | 0 | 0 | 0 | 0 |
| 275276 | 1 | 0 | 0 | 0 | 0 |
| 275277 | 1 | 0 | 0 | 0 | 0 |
| 275278 | 1 | 0 | 0 | 0 | 0 |
| 280281 | 1 | 0 | 0 | 0 | 0 |
| 280282 | 1 | 0 | 0 | 0 | 0 |
| 280290 | 1 | 0 | 0 | 0 | 0 |
| 280292 | 1 | 0 | 0 | 0 | 0 |
| 283284 | 1 | 0 | 0 | 0 | 0 |
| 283285 | 1 | 0 | 0 | 0 | 0 |
| 283286 | 1 | 0 | 0 | 0 | 0 |
| 286287 | 1 | 0 | 0 | 0 | 0 |
| 286288 | 1 | 0 | 0 | 0 | 0 |
| 286289 | 1 | 0 | 0 | 0 | 0 |
| 289290 | 1 | 0 | 0 | 0 | 0 |
| 289291 | 2 | 0 | 0 | 0 | 0 |
| 292293 | 1 | 0 | 0 | 0 | 0 |
| 292294 | 1 | 0 | 0 | 0 | 0 |
| 292295 | 1 | 0 | 0 | 0 | 0 |
| 295296 | 1 | 0 | 0 | 0 | 0 |
| 296297 | 1 | 0 | 0 | 0 | 0 |
| 296298 | 1 | 0 | 0 | 0 | 0 |
| 296299 | 1 | 0 | 0 | 0 | 0 |
| 299300 | 1 | 0 | 0 | 0 | 0 |
| 299301 | 1 | 0 | 0 | 0 | 0 |
| 299302 | 1 | 0 | 0 | 0 | 0 |
| 302303 | 1 | 0 | 0 | 0 | 0 |
| 302304 | 1 | 0 | 0 | 0 | 0 |
| 302305 | 1 | 0 | 0 | 0 | 0 |
| 305306 | 1 | 0 | 0 | 0 | 0 |
| 305307 | 1 | 0 | 0 | 0 | 0 |
| 305308 | 1 | 0 | 0 | 0 | 0 |
| 308309 | 1 | 0 | 0 | 0 | 0 |
| 308310 | 1 | 0 | 0 | 0 | 0 |
| 308311 | 1 | 0 | 0 | 0 | 0 |

311312 1 0 0 0 0  
311313 1 0 0 0 0  
311314 1 0 0 0 0  
314315 1 0 0 0 0  
315316 1 0 0 0 0  
315317 1 0 0 0 0

M END  
> <NAME>  
U25\_1

\$\$\$\$  
U28\_1  
MOE2012 3D

327326 0 0 1 0 0 0 0 0999 V2000  
12.9260 6.7500 -17.6330 O 0 0 0 0 0 0 0 0 0 0 0 0 0 0 0 0  
12.3450 6.9830 -18.3760 H 0 0 0 0 0 0 0 0 0 0 0 0 0 0 0 0  
13.3910 5.4280 -17.8650 C 0 0 0 0 0 0 0 0 0 0 0 0 0 0 0 0  
12.5270 4.7590 -17.9240 H 0 0 0 0 0 0 0 0 0 0 0 0 0 0 0 0  
13.9250 5.4090 -18.8200 H 0 0 0 0 0 0 0 0 0 0 0 0 0 0 0 0  
14.3080 5.0330 -16.7200 C 0 0 0 0 0 0 0 0 0 0 0 0 0 0 0 0  
15.1300 5.7570 -16.6490 H 0 0 0 0 0 0 0 0 0 0 0 0 0 0 0 0  
13.7610 5.1090 -15.7720 H 0 0 0 0 0 0 0 0 0 0 0 0 0 0 0 0  
14.8600 3.6220 -16.9000 C 0 0 0 0 0 0 0 0 0 0 0 0 0 0 0 0  
14.0300 2.9050 -16.9450 H 0 0 0 0 0 0 0 0 0 0 0 0 0 0 0 0  
15.3960 3.5580 -17.8560 H 0 0 0 0 0 0 0 0 0 0 0 0 0 0 0 0  
15.8030 3.2610 -15.7520 C 0 0 0 0 0 0 0 0 0 0 0 0 0 0 0 0  
16.6070 4.0040 -15.7140 H 0 0 0 0 0 0 0 0 0 0 0 0 0 0 0 0  
15.2550 3.3030 -14.8030 H 0 0 0 0 0 0 0 0 0 0 0 0 0 0 0 0  
16.3500 1.9210 -15.9640 N 0 0 3 0 0 0 0 0 0 0 0 0 0 0 0 0  
15.5760 1.2600 -16.0470 H 0 0 0 0 0 0 0 0 0 0 0 0 0 0 0 0  
20.6930 10.7460 -4.2640 C 0 0 0 0 0 0 0 0 0 0 0 0 0 0 0 0  
19.8550 10.3950 -3.6500 H 0 0 0 0 0 0 0 0 0 0 0 0 0 0 0 0  
20.3750 10.6250 -5.3040 H 0 0 0 0 0 0 0 0 0 0 0 0 0 0 0 0  
20.9460 12.1430 -4.0640 O 0 0 0 0 0 0 0 0 0 0 0 0 0 0 0 0  
20.8960 12.5810 -2.7750 C 0 0 0 0 0 0 0 0 0 0 0 0 0 0 0 0  
21.4180 13.9910 -2.6860 C 0 0 0 0 0 0 0 0 0 0 0 0 0 0 0 0  
21.3690 14.4800 -3.6650 H 0 0 0 0 0 0 0 0 0 0 0 0 0 0 0 0  
20.7410 14.5550 -2.0330 H 0 0 0 0 0 0 0 0 0 0 0 0 0 0 0 0  
22.8340 13.9930 -2.1100 C 0 0 0 0 0 0 0 0 0 0 0 0 0 0 0 0  
22.7630 13.5800 -1.0960 H 0 0 0 0 0 0 0 0 0 0 0 0 0 0 0 0  
23.1810 15.0260 -1.9840 H 0 0 0 0 0 0 0 0 0 0 0 0 0 0 0 0  
20.5340 11.9200 -1.8100 O 0 0 0 0 0 0 0 0 0 0 0 0 0 0 0 0  
21.5040 2.0540 -12.6580 C 0 0 0 0 0 0 0 0 0 0 0 0 0 0 0 0  
21.5810 0.9640 -12.5560 H 0 0 0 0 0 0 0 0 0 0 0 0 0 0 0 0  
22.4980 2.3970 -12.9650 H 0 0 0 0 0 0 0 0 0 0 0 0 0 0 0 0  
17.2130 1.4890 -14.8630 C 0 0 0 0 0 0 0 0 0 0 0 0 0 0 0 0  
16.6970 1.6020 -13.9010 H 0 0 0 0 0 0 0 0 0 0 0 0 0 0 0 0  
17.3930 0.4130 -14.9860 H 0 0 0 0 0 0 0 0 0 0 0 0 0 0 0 0  
18.5590 2.2100 -14.8550 C 0 0 0 0 0 0 0 0 0 0 0 0 0 0 0 0  
19.0880 2.0360 -15.7990 H 0 0 0 0 0 0 0 0 0 0 0 0 0 0 0 0  
18.4240 3.2870 -14.7110 H 0 0 0 0 0 0 0 0 0 0 0 0 0 0 0 0  
19.4170 1.7090 -13.7270 C 0 0 0 0 0 0 0 0 0 0 0 0 0 0 0 0  
20.5850 2.4130 -13.7000 O 0 0 0 0 0 0 0 0 0 0 0 0 0 0 0 0  
19.1100 0.8190 -12.9470 O 0 0 0 0 0 0 0 0 0 0 0 0 0 0 0 0  
21.1170 2.7130 -11.3380 C 0 0 0 0 0 0 0 0 0 0 0 0 0 0 0 0  
21.0690 3.7990 -11.4760 H 0 0 0 0 0 0 0 0 0 0 0 0 0 0 0 0  
20.1270 2.3730 -11.0180 H 0 0 0 0 0 0 0 0 0 0 0 0 0 0 0 0  
22.0930 2.3780 -10.3560 O 0 0 0 0 0 0 0 0 0 0 0 0 0 0 0 0  
21.7520 2.8220 -9.0420 C 0 0 0 0 0 0 0 0 0 0 0 0 0 0 0 0  
20.7170 2.5500 -8.8050 H 0 0 0 0 0 0 0 0 0 0 0 0 0 0 0 0  
22.3970 2.2700 -8.3500 H 0 0 0 0 0 0 0 0 0 0 0 0 0 0 0 0  
21.9920 4.3220 -8.8670 C 0 0 0 0 0 0 0 0 0 0 0 0 0 0 0 0  
23.0140 4.5640 -9.1820 H 0 0 0 0 0 0 0 0 0 0 0 0 0 0 0 0  
21.3290 4.8870 -9.5320 H 0 0 0 0 0 0 0 0 0 0 0 0 0 0 0 0  
21.7640 4.7660 -7.4210 C 0 0 0 0 0 0 0 0 0 0 0 0 0 0 0 0  
20.7410 4.5140 -7.1170 H 0 0 0 0 0 0 0 0 0 0 0 0 0 0 0 0  
22.4440 4.2180 -6.7570 H 0 0 0 0 0 0 0 0 0 0 0 0 0 0 0 0  
21.9900 6.2710 -7.2560 C 0 0 0 0 0 0 0 0 0 0 0 0 0 0 0 0  
23.0120 6.5250 -7.5640 H 0 0 0 0 0 0 0 0 0 0 0 0 0 0 0 0  
21.3080 6.8190 -7.9170 H 0 0 0 0 0 0 0 0 0 0 0 0 0 0 0 0  
21.7670 6.7180 -5.8100 C 0 0 0 0 0 0 0 0 0 0 0 0 0 0 0 0  
20.7510 6.4610 -5.4860 H 0 0 0 0 0 0 0 0 0 0 0 0 0 0 0 0  
22.4430 6.1750 -5.1380 H 0 0 0 0 0 0 0 0 0 0 0 0 0 0 0 0  
21.9850 8.2190 -5.6410 C 0 0 0 0 0 0 0 0 0 0 0 0 0 0 0 0  
23.0100 8.4840 -5.9260 H 0 0 0 0 0 0 0 0 0 0 0 0 0 0 0 0  
21.2850 8.7730 -6.2740 H 0 0 0 0 0 0 0 0 0 0 0 0 0 0 0 0  
21.7740 8.5520 -4.2690 O 0 0 0 0 0 0 0 0 0 0 0 0 0 0 0 0  
21.9620 9.9390 -3.9930 C 0 0 0 0 0 0 0 0 0 0 0 0 0 0 0 0  
22.8180 10.3410 -4.5500 H 0 0 0 0 0 0 0 0 0 0 0 0 0 0 0 0  
22.2250 10.0240 -2.9340 H 0 0 0 0 0 0 0 0 0 0 0 0 0 0 0 0

|         |         |         |   |   |   |   |   |   |   |   |   |   |   |   |   |   |
|---------|---------|---------|---|---|---|---|---|---|---|---|---|---|---|---|---|---|
| 27.9500 | 16.8160 | -4.0320 | O | 0 | 0 | 0 | 0 | 0 | 0 | 0 | 0 | 0 | 0 | 0 | 0 | 0 |
| 28.2770 | 17.6760 | -4.3470 | H | 0 | 0 | 0 | 0 | 0 | 0 | 0 | 0 | 0 | 0 | 0 | 0 | 0 |
| 26.5920 | 16.7090 | -4.4390 | C | 0 | 0 | 0 | 0 | 0 | 0 | 0 | 0 | 0 | 0 | 0 | 0 | 0 |
| 26.0260 | 17.5320 | -3.9920 | H | 0 | 0 | 0 | 0 | 0 | 0 | 0 | 0 | 0 | 0 | 0 | 0 | 0 |
| 26.5500 | 16.7980 | -5.5300 | H | 0 | 0 | 0 | 0 | 0 | 0 | 0 | 0 | 0 | 0 | 0 | 0 | 0 |
| 26.0470 | 15.3620 | -3.9800 | C | 0 | 0 | 0 | 0 | 0 | 0 | 0 | 0 | 0 | 0 | 0 | 0 | 0 |
| 26.6840 | 14.5630 | -4.3790 | H | 0 | 0 | 0 | 0 | 0 | 0 | 0 | 0 | 0 | 0 | 0 | 0 | 0 |
| 26.1320 | 15.3080 | -2.8910 | H | 0 | 0 | 0 | 0 | 0 | 0 | 0 | 0 | 0 | 0 | 0 | 0 | 0 |
| 24.5990 | 15.1570 | -4.4220 | C | 0 | 0 | 0 | 0 | 0 | 0 | 0 | 0 | 0 | 0 | 0 | 0 | 0 |
| 23.9470 | 15.8790 | -3.9180 | H | 0 | 0 | 0 | 0 | 0 | 0 | 0 | 0 | 0 | 0 | 0 | 0 | 0 |
| 24.5290 | 15.3930 | -5.4920 | H | 0 | 0 | 0 | 0 | 0 | 0 | 0 | 0 | 0 | 0 | 0 | 0 | 0 |
| 24.0690 | 13.7240 | -4.2450 | C | 0 | 0 | 0 | 0 | 0 | 0 | 0 | 0 | 0 | 0 | 0 | 0 | 0 |
| 23.1400 | 13.6510 | -4.8230 | H | 0 | 0 | 0 | 0 | 0 | 0 | 0 | 0 | 0 | 0 | 0 | 0 | 0 |
| 24.7460 | 13.0300 | -4.7610 | H | 0 | 0 | 0 | 0 | 0 | 0 | 0 | 0 | 0 | 0 | 0 | 0 | 0 |
| 23.8000 | 13.2070 | -2.8950 | N | 0 | 0 | 3 | 0 | 0 | 0 | 0 | 0 | 0 | 0 | 0 | 0 | 0 |
| 32.4790 | 0.3430  | 0.5870  | C | 0 | 0 | 0 | 0 | 0 | 0 | 0 | 0 | 0 | 0 | 0 | 0 | 0 |
| 33.1810 | 0.5310  | -0.2330 | H | 0 | 0 | 0 | 0 | 0 | 0 | 0 | 0 | 0 | 0 | 0 | 0 | 0 |
| 31.6980 | -0.3540 | 0.2660  | H | 0 | 0 | 0 | 0 | 0 | 0 | 0 | 0 | 0 | 0 | 0 | 0 | 0 |
| 33.1940 | -0.2280 | 1.6960  | O | 0 | 0 | 0 | 0 | 0 | 0 | 0 | 0 | 0 | 0 | 0 | 0 | 0 |
| 33.8970 | -1.3570 | 1.4120  | C | 0 | 0 | 0 | 0 | 0 | 0 | 0 | 0 | 0 | 0 | 0 | 0 | 0 |
| 34.7560 | -1.7380 | 2.5920  | C | 0 | 0 | 0 | 0 | 0 | 0 | 0 | 0 | 0 | 0 | 0 | 0 | 0 |
| 34.4650 | -1.1170 | 3.4450  | H | 0 | 0 | 0 | 0 | 0 | 0 | 0 | 0 | 0 | 0 | 0 | 0 | 0 |
| 34.5360 | -2.7740 | 2.8710  | H | 0 | 0 | 0 | 0 | 0 | 0 | 0 | 0 | 0 | 0 | 0 | 0 | 0 |
| 36.2290 | -1.5560 | 2.2180  | C | 0 | 0 | 0 | 0 | 0 | 0 | 0 | 0 | 0 | 0 | 0 | 0 | 0 |
| 36.3440 | -0.7610 | 1.4700  | H | 0 | 0 | 0 | 0 | 0 | 0 | 0 | 0 | 0 | 0 | 0 | 0 | 0 |
| 36.5610 | -2.4530 | 1.6780  | H | 0 | 0 | 0 | 0 | 0 | 0 | 0 | 0 | 0 | 0 | 0 | 0 | 0 |
| 33.8810 | -1.9550 | 0.3460  | O | 0 | 0 | 0 | 0 | 0 | 0 | 0 | 0 | 0 | 0 | 0 | 0 | 0 |
| 28.0090 | 10.0280 | -0.5300 | C | 0 | 0 | 0 | 0 | 0 | 0 | 0 | 0 | 0 | 0 | 0 | 0 | 0 |
| 27.9790 | 10.0650 | 0.5660  | H | 0 | 0 | 0 | 0 | 0 | 0 | 0 | 0 | 0 | 0 | 0 | 0 | 0 |
| 28.2040 | 8.9830  | -0.7900 | H | 0 | 0 | 0 | 0 | 0 | 0 | 0 | 0 | 0 | 0 | 0 | 0 | 0 |
| 25.0110 | 12.8840 | -2.1330 | C | 0 | 0 | 0 | 0 | 0 | 0 | 0 | 0 | 0 | 0 | 0 | 0 | 0 |
| 25.8360 | 12.6310 | -2.8120 | H | 0 | 0 | 0 | 0 | 0 | 0 | 0 | 0 | 0 | 0 | 0 | 0 | 0 |
| 25.3500 | 13.7430 | -1.5410 | H | 0 | 0 | 0 | 0 | 0 | 0 | 0 | 0 | 0 | 0 | 0 | 0 | 0 |
| 24.7830 | 11.6750 | -1.2280 | C | 0 | 0 | 0 | 0 | 0 | 0 | 0 | 0 | 0 | 0 | 0 | 0 | 0 |
| 24.0000 | 11.8450 | -0.4810 | H | 0 | 0 | 0 | 0 | 0 | 0 | 0 | 0 | 0 | 0 | 0 | 0 | 0 |
| 24.4770 | 10.7970 | -1.8080 | H | 0 | 0 | 0 | 0 | 0 | 0 | 0 | 0 | 0 | 0 | 0 | 0 | 0 |
| 26.0560 | 11.3720 | -0.4890 | C | 0 | 0 | 0 | 0 | 0 | 0 | 0 | 0 | 0 | 0 | 0 | 0 | 0 |
| 26.7370 | 10.3680 | -1.1050 | O | 0 | 0 | 0 | 0 | 0 | 0 | 0 | 0 | 0 | 0 | 0 | 0 | 0 |
| 26.4340 | 11.9890 | 0.4980  | O | 0 | 0 | 0 | 0 | 0 | 0 | 0 | 0 | 0 | 0 | 0 | 0 | 0 |
| 29.1040 | 10.9320 | -1.0910 | C | 0 | 0 | 0 | 0 | 0 | 0 | 0 | 0 | 0 | 0 | 0 | 0 | 0 |
| 29.1440 | 10.8730 | -2.1860 | H | 0 | 0 | 0 | 0 | 0 | 0 | 0 | 0 | 0 | 0 | 0 | 0 | 0 |
| 28.8690 | 11.9770 | -0.8590 | H | 0 | 0 | 0 | 0 | 0 | 0 | 0 | 0 | 0 | 0 | 0 | 0 | 0 |
| 30.3860 | 10.6590 | -0.5320 | O | 0 | 0 | 0 | 0 | 0 | 0 | 0 | 0 | 0 | 0 | 0 | 0 | 0 |
| 30.9690 | 9.4340  | -0.9750 | C | 0 | 0 | 0 | 0 | 0 | 0 | 0 | 0 | 0 | 0 | 0 | 0 | 0 |
| 30.3990 | 8.9830  | -1.7950 | H | 0 | 0 | 0 | 0 | 0 | 0 | 0 | 0 | 0 | 0 | 0 | 0 | 0 |
| 31.9680 | 9.6660  | -1.3580 | H | 0 | 0 | 0 | 0 | 0 | 0 | 0 | 0 | 0 | 0 | 0 | 0 | 0 |
| 31.0840 | 8.4810  | 0.2110  | C | 0 | 0 | 0 | 0 | 0 | 0 | 0 | 0 | 0 | 0 | 0 | 0 | 0 |
| 31.7360 | 8.9290  | 0.9710  | H | 0 | 0 | 0 | 0 | 0 | 0 | 0 | 0 | 0 | 0 | 0 | 0 | 0 |
| 30.1050 | 8.3650  | 0.6910  | H | 0 | 0 | 0 | 0 | 0 | 0 | 0 | 0 | 0 | 0 | 0 | 0 | 0 |
| 31.6210 | 7.1150  | -0.2100 | C | 0 | 0 | 0 | 0 | 0 | 0 | 0 | 0 | 0 | 0 | 0 | 0 | 0 |
| 30.9500 | 6.6730  | -0.9580 | H | 0 | 0 | 0 | 0 | 0 | 0 | 0 | 0 | 0 | 0 | 0 | 0 | 0 |
| 32.6020 | 7.2330  | -0.6850 | H | 0 | 0 | 0 | 0 | 0 | 0 | 0 | 0 | 0 | 0 | 0 | 0 | 0 |
| 31.7420 | 6.1730  | 0.9890  | C | 0 | 0 | 0 | 0 | 0 | 0 | 0 | 0 | 0 | 0 | 0 | 0 | 0 |
| 32.4430 | 6.5990  | 1.7170  | H | 0 | 0 | 0 | 0 | 0 | 0 | 0 | 0 | 0 | 0 | 0 | 0 | 0 |
| 30.7690 | 6.0860  | 1.4890  | H | 0 | 0 | 0 | 0 | 0 | 0 | 0 | 0 | 0 | 0 | 0 | 0 | 0 |
| 32.2190 | 4.7860  | 0.5640  | C | 0 | 0 | 0 | 0 | 0 | 0 | 0 | 0 | 0 | 0 | 0 | 0 | 0 |
| 31.5110 | 4.3480  | -0.1490 | H | 0 | 0 | 0 | 0 | 0 | 0 | 0 | 0 | 0 | 0 | 0 | 0 | 0 |
| 33.1760 | 4.8590  | 0.0320  | H | 0 | 0 | 0 | 0 | 0 | 0 | 0 | 0 | 0 | 0 | 0 | 0 | 0 |
| 32.3850 | 3.8610  | 1.7670  | C | 0 | 0 | 0 | 0 | 0 | 0 | 0 | 0 | 0 | 0 | 0 | 0 | 0 |
| 33.1260 | 4.2860  | 2.4520  | H | 0 | 0 | 0 | 0 | 0 | 0 | 0 | 0 | 0 | 0 | 0 | 0 | 0 |
| 31.4490 | 3.7510  | 2.3280  | H | 0 | 0 | 0 | 0 | 0 | 0 | 0 | 0 | 0 | 0 | 0 | 0 | 0 |
| 32.8860 | 2.5920  | 1.3500  | O | 0 | 0 | 0 | 0 | 0 | 0 | 0 | 0 | 0 | 0 | 0 | 0 | 0 |
| 31.8480 | 1.6560  | 1.0430  | C | 0 | 0 | 0 | 0 | 0 | 0 | 0 | 0 | 0 | 0 | 0 | 0 | 0 |
| 31.2120 | 2.0550  | 0.2460  | H | 0 | 0 | 0 | 0 | 0 | 0 | 0 | 0 | 0 | 0 | 0 | 0 | 0 |
| 31.2470 | 1.4870  | 1.9440  | H | 0 | 0 | 0 | 0 | 0 | 0 | 0 | 0 | 0 | 0 | 0 | 0 | 0 |
| 36.2570 | 4.8190  | 3.9790  | O | 0 | 0 | 0 | 0 | 0 | 0 | 0 | 0 | 0 | 0 | 0 | 0 | 0 |
| 36.0810 | 5.5750  | 3.3920  | H | 0 | 0 | 0 | 0 | 0 | 0 | 0 | 0 | 0 | 0 | 0 | 0 | 0 |
| 36.4480 | 3.6860  | 3.1450  | C | 0 | 0 | 0 | 0 | 0 | 0 | 0 | 0 | 0 | 0 | 0 | 0 | 0 |
| 35.5770 | 3.5840  | 2.4910  | H | 0 | 0 | 0 | 0 | 0 | 0 | 0 | 0 | 0 | 0 | 0 | 0 | 0 |
| 37.3370 | 3.8520  | 2.5280  | H | 0 | 0 | 0 | 0 | 0 | 0 | 0 | 0 | 0 | 0 | 0 | 0 | 0 |
| 36.6150 | 2.4560  | 4.0220  | C | 0 | 0 | 0 | 0 | 0 | 0 | 0 | 0 | 0 | 0 | 0 | 0 | 0 |
| 37.4860 | 2.5890  | 4.6760  | H | 0 | 0 | 0 | 0 | 0 | 0 | 0 | 0 | 0 | 0 | 0 | 0 | 0 |
| 35.7490 | 2.3640  | 4.6900  | H | 0 | 0 | 0 | 0 | 0 | 0 | 0 | 0 | 0 | 0 | 0 | 0 | 0 |
| 36.7670 | 1.1930  | 3.1770  | C | 0 | 0 | 0 | 0 | 0 | 0 | 0 | 0 | 0 | 0 | 0 | 0 | 0 |
| 35.8850 | 1.1060  | 2.5320  | H | 0 | 0 | 0 | 0 | 0 | 0 | 0 | 0 | 0 | 0 | 0 | 0 | 0 |
| 37.6460 | 1.2880  | 2.5280  | H | 0 | 0 | 0 | 0 | 0 | 0 | 0 | 0 | 0 | 0 | 0 | 0 | 0 |
| 36.9080 | -0.0510 | 4.0650  | C | 0 | 0 | 0 | 0 | 0 | 0 | 0 | 0 | 0 | 0 | 0 | 0 | 0 |
| 37.7490 | 0.1410  | 4.7410  | H | 0 | 0 | 0 | 0 | 0 | 0 | 0 | 0 | 0 | 0 | 0 | 0 | 0 |
| 36.0170 | -0.1480 | 4.6970  | H | 0 | 0 | 0 | 0 | 0 | 0 | 0 | 0 | 0 | 0 | 0 | 0 | 0 |
| 37.1670 | -1.3030 | 3.3280  | N | 0 | 0 | 3 | 0 | 0 | 0 | 0 | 0 | 0 | 0 | 0 | 0 | 0 |
| 49.7040 | -2.2360 | 11.1040 | C | 0 | 0 | 0 | 0 | 0 | 0 | 0 | 0 | 0 | 0 | 0 | 0 | 0 |

|         |          |         |   |   |   |   |   |   |   |   |   |   |   |   |
|---------|----------|---------|---|---|---|---|---|---|---|---|---|---|---|---|
| 49.4890 | -1.5880  | 11.9620 | H | 0 | 0 | 0 | 0 | 0 | 0 | 0 | 0 | 0 | 0 | 0 |
| 49.0500 | -1.9410  | 10.2760 | H | 0 | 0 | 0 | 0 | 0 | 0 | 0 | 0 | 0 | 0 | 0 |
| 51.0710 | -2.0980  | 10.6990 | O | 0 | 0 | 0 | 0 | 0 | 0 | 0 | 0 | 0 | 0 | 0 |
| 51.4790 | -0.8160  | 10.4870 | C | 0 | 0 | 0 | 0 | 0 | 0 | 0 | 0 | 0 | 0 | 0 |
| 52.9460 | -0.7830  | 10.1590 | C | 0 | 0 | 0 | 0 | 0 | 0 | 0 | 0 | 0 | 0 | 0 |
| 53.2900 | -1.7830  | 9.8690  | H | 0 | 0 | 0 | 0 | 0 | 0 | 0 | 0 | 0 | 0 | 0 |
| 53.0700 | -0.1500  | 9.2720  | H | 0 | 0 | 0 | 0 | 0 | 0 | 0 | 0 | 0 | 0 | 0 |
| 53.7680 | -0.2330  | 11.3210 | C | 0 | 0 | 0 | 0 | 0 | 0 | 0 | 0 | 0 | 0 | 0 |
| 53.4260 | 0.7750   | 11.5890 | H | 0 | 0 | 0 | 0 | 0 | 0 | 0 | 0 | 0 | 0 | 0 |
| 54.7960 | -0.1000  | 10.9600 | H | 0 | 0 | 0 | 0 | 0 | 0 | 0 | 0 | 0 | 0 | 0 |
| 50.7720 | 0.1790   | 10.5710 | O | 0 | 0 | 0 | 0 | 0 | 0 | 0 | 0 | 0 | 0 | 0 |
| 40.1260 | -4.8470  | 7.3680  | C | 0 | 0 | 0 | 0 | 0 | 0 | 0 | 0 | 0 | 0 | 0 |
| 39.6900 | -5.7660  | 6.9560  | H | 0 | 0 | 0 | 0 | 0 | 0 | 0 | 0 | 0 | 0 | 0 |
| 41.2080 | -5.0120  | 7.3750  | H | 0 | 0 | 0 | 0 | 0 | 0 | 0 | 0 | 0 | 0 | 0 |
| 37.2650 | -2.4630  | 4.2330  | C | 0 | 0 | 0 | 0 | 0 | 0 | 0 | 0 | 0 | 0 | 0 |
| 36.3700 | -2.5430  | 4.8630  | H | 0 | 0 | 0 | 0 | 0 | 0 | 0 | 0 | 0 | 0 | 0 |
| 37.3070 | -3.3850  | 3.6370  | H | 0 | 0 | 0 | 0 | 0 | 0 | 0 | 0 | 0 | 0 | 0 |
| 38.5280 | -2.4220  | 5.1000  | C | 0 | 0 | 0 | 0 | 0 | 0 | 0 | 0 | 0 | 0 | 0 |
| 39.4130 | -2.3580  | 4.4570  | H | 0 | 0 | 0 | 0 | 0 | 0 | 0 | 0 | 0 | 0 | 0 |
| 38.5170 | -1.5700  | 5.7860  | H | 0 | 0 | 0 | 0 | 0 | 0 | 0 | 0 | 0 | 0 | 0 |
| 38.6380 | -3.6640  | 5.9440  | C | 0 | 0 | 0 | 0 | 0 | 0 | 0 | 0 | 0 | 0 | 0 |
| 39.8760 | -3.7190  | 6.5160  | O | 0 | 0 | 0 | 0 | 0 | 0 | 0 | 0 | 0 | 0 | 0 |
| 37.7430 | -4.4790  | 6.1140  | O | 0 | 0 | 0 | 0 | 0 | 0 | 0 | 0 | 0 | 0 | 0 |
| 39.6170 | -4.5770  | 8.7800  | C | 0 | 0 | 0 | 0 | 0 | 0 | 0 | 0 | 0 | 0 | 0 |
| 39.9770 | -3.6080  | 9.1490  | H | 0 | 0 | 0 | 0 | 0 | 0 | 0 | 0 | 0 | 0 | 0 |
| 38.5240 | -4.5100  | 8.7700  | H | 0 | 0 | 0 | 0 | 0 | 0 | 0 | 0 | 0 | 0 | 0 |
| 39.9720 | -5.6550  | 9.6410  | O | 0 | 0 | 0 | 0 | 0 | 0 | 0 | 0 | 0 | 0 | 0 |
| 40.9310 | -5.3130  | 10.6420 | C | 0 | 0 | 0 | 0 | 0 | 0 | 0 | 0 | 0 | 0 | 0 |
| 40.5870 | -4.4360  | 11.2040 | H | 0 | 0 | 0 | 0 | 0 | 0 | 0 | 0 | 0 | 0 | 0 |
| 40.9650 | -6.1530  | 11.3430 | H | 0 | 0 | 0 | 0 | 0 | 0 | 0 | 0 | 0 | 0 | 0 |
| 42.3220 | -5.0900  | 10.0480 | C | 0 | 0 | 0 | 0 | 0 | 0 | 0 | 0 | 0 | 0 | 0 |
| 42.5960 | -5.9570  | 9.4350  | H | 0 | 0 | 0 | 0 | 0 | 0 | 0 | 0 | 0 | 0 | 0 |
| 42.3010 | -4.2310  | 9.3680  | H | 0 | 0 | 0 | 0 | 0 | 0 | 0 | 0 | 0 | 0 | 0 |
| 43.3780 | -4.8520  | 11.1270 | C | 0 | 0 | 0 | 0 | 0 | 0 | 0 | 0 | 0 | 0 | 0 |
| 43.0900 | -3.9920  | 11.7420 | H | 0 | 0 | 0 | 0 | 0 | 0 | 0 | 0 | 0 | 0 | 0 |
| 43.4300 | -5.7240  | 11.7910 | H | 0 | 0 | 0 | 0 | 0 | 0 | 0 | 0 | 0 | 0 | 0 |
| 44.7510 | -4.5990  | 10.4990 | C | 0 | 0 | 0 | 0 | 0 | 0 | 0 | 0 | 0 | 0 | 0 |
| 45.0340 | -5.4580  | 9.8790  | H | 0 | 0 | 0 | 0 | 0 | 0 | 0 | 0 | 0 | 0 | 0 |
| 44.6930 | -3.7280  | 9.8340  | H | 0 | 0 | 0 | 0 | 0 | 0 | 0 | 0 | 0 | 0 | 0 |
| 45.8240 | -4.3600  | 11.5590 | C | 0 | 0 | 0 | 0 | 0 | 0 | 0 | 0 | 0 | 0 | 0 |
| 45.5490 | -3.5080  | 12.1940 | H | 0 | 0 | 0 | 0 | 0 | 0 | 0 | 0 | 0 | 0 | 0 |
| 45.8950 | -5.2250  | 12.2290 | H | 0 | 0 | 0 | 0 | 0 | 0 | 0 | 0 | 0 | 0 | 0 |
| 47.1860 | -4.0970  | 10.9240 | C | 0 | 0 | 0 | 0 | 0 | 0 | 0 | 0 | 0 | 0 | 0 |
| 47.4860 | -4.9540  | 10.3100 | H | 0 | 0 | 0 | 0 | 0 | 0 | 0 | 0 | 0 | 0 | 0 |
| 47.1400 | -3.2040  | 10.2930 | H | 0 | 0 | 0 | 0 | 0 | 0 | 0 | 0 | 0 | 0 | 0 |
| 48.1390 | -3.9060  | 11.9690 | O | 0 | 0 | 0 | 0 | 0 | 0 | 0 | 0 | 0 | 0 | 0 |
| 49.4650 | -3.6920  | 11.4900 | C | 0 | 0 | 0 | 0 | 0 | 0 | 0 | 0 | 0 | 0 | 0 |
| 49.7000 | -4.3690  | 10.6600 | H | 0 | 0 | 0 | 0 | 0 | 0 | 0 | 0 | 0 | 0 | 0 |
| 50.1510 | -3.9600  | 12.3010 | H | 0 | 0 | 0 | 0 | 0 | 0 | 0 | 0 | 0 | 0 | 0 |
| 50.2660 | -1.5830  | 17.5920 | O | 0 | 0 | 0 | 0 | 0 | 0 | 0 | 0 | 0 | 0 | 0 |
| 49.8630 | -2.2940  | 18.1200 | H | 0 | 0 | 0 | 0 | 0 | 0 | 0 | 0 | 0 | 0 | 0 |
| 50.9590 | -2.1960  | 16.5150 | C | 0 | 0 | 0 | 0 | 0 | 0 | 0 | 0 | 0 | 0 | 0 |
| 51.7520 | -2.8270  | 16.9270 | H | 0 | 0 | 0 | 0 | 0 | 0 | 0 | 0 | 0 | 0 | 0 |
| 50.2570 | -2.8240  | 15.9570 | H | 0 | 0 | 0 | 0 | 0 | 0 | 0 | 0 | 0 | 0 | 0 |
| 51.5350 | -1.1040  | 15.6250 | C | 0 | 0 | 0 | 0 | 0 | 0 | 0 | 0 | 0 | 0 | 0 |
| 50.7180 | -0.4850  | 15.2340 | H | 0 | 0 | 0 | 0 | 0 | 0 | 0 | 0 | 0 | 0 | 0 |
| 52.1580 | -0.4330  | 16.2290 | H | 0 | 0 | 0 | 0 | 0 | 0 | 0 | 0 | 0 | 0 | 0 |
| 52.3530 | -1.6920  | 14.4780 | C | 0 | 0 | 0 | 0 | 0 | 0 | 0 | 0 | 0 | 0 | 0 |
| 53.1540 | -2.3100  | 14.8980 | H | 0 | 0 | 0 | 0 | 0 | 0 | 0 | 0 | 0 | 0 | 0 |
| 51.7180 | -2.3570  | 13.8790 | H | 0 | 0 | 0 | 0 | 0 | 0 | 0 | 0 | 0 | 0 | 0 |
| 52.9230 | -0.5850  | 13.5790 | C | 0 | 0 | 0 | 0 | 0 | 0 | 0 | 0 | 0 | 0 | 0 |
| 52.0640 | -0.0290  | 13.1820 | H | 0 | 0 | 0 | 0 | 0 | 0 | 0 | 0 | 0 | 0 | 0 |
| 53.5180 | 0.1300   | 14.1610 | H | 0 | 0 | 0 | 0 | 0 | 0 | 0 | 0 | 0 | 0 | 0 |
| 53.7150 | -1.1540  | 12.4740 | N | 0 | 0 | 3 | 0 | 0 | 0 | 0 | 0 | 0 | 0 | 0 |
| 58.3790 | -14.0060 | 11.3330 | C | 0 | 0 | 0 | 0 | 0 | 0 | 0 | 0 | 0 | 0 | 0 |
| 59.1890 | -13.8920 | 10.6030 | H | 0 | 0 | 0 | 0 | 0 | 0 | 0 | 0 | 0 | 0 | 0 |
| 58.0860 | -13.0110 | 11.6850 | H | 0 | 0 | 0 | 0 | 0 | 0 | 0 | 0 | 0 | 0 | 0 |
| 57.2420 | -14.6390 | 10.7290 | O | 0 | 0 | 0 | 0 | 0 | 0 | 0 | 0 | 0 | 0 | 0 |
| 56.7710 | -14.0310 | 9.6030  | C | 0 | 0 | 0 | 0 | 0 | 0 | 0 | 0 | 0 | 0 | 0 |
| 55.5390 | -14.7380 | 9.1020  | C | 0 | 0 | 0 | 0 | 0 | 0 | 0 | 0 | 0 | 0 | 0 |
| 55.0740 | -15.3040 | 9.9150  | H | 0 | 0 | 0 | 0 | 0 | 0 | 0 | 0 | 0 | 0 | 0 |
| 54.8080 | -13.9640 | 8.8380  | H | 0 | 0 | 0 | 0 | 0 | 0 | 0 | 0 | 0 | 0 | 0 |
| 55.8270 | -15.6110 | 7.8810  | C | 0 | 0 | 0 | 0 | 0 | 0 | 0 | 0 | 0 | 0 | 0 |
| 56.1360 | -14.9370 | 7.0700  | H | 0 | 0 | 0 | 0 | 0 | 0 | 0 | 0 | 0 | 0 | 0 |
| 54.8850 | -16.0750 | 7.5650  | H | 0 | 0 | 0 | 0 | 0 | 0 | 0 | 0 | 0 | 0 | 0 |
| 57.2500 | -13.0320 | 9.0830  | O | 0 | 0 | 0 | 0 | 0 | 0 | 0 | 0 | 0 | 0 | 0 |
| 58.2300 | -4.0470  | 14.2130 | C | 0 | 0 | 0 | 0 | 0 | 0 | 0 | 0 | 0 | 0 | 0 |
| 58.9670 | -3.2400  | 14.1160 | H | 0 | 0 | 0 | 0 | 0 | 0 | 0 | 0 | 0 | 0 | 0 |
| 58.0840 | -4.1920  | 15.2890 | H | 0 | 0 | 0 | 0 | 0 | 0 | 0 | 0 | 0 | 0 | 0 |
| 55.0620 | -1.5430  | 12.9220 | C | 0 | 0 | 0 | 0 | 0 | 0 | 0 | 0 | 0 | 0 | 0 |
| 55.7320 | -0.6730  | 12.9760 | H | 0 | 0 | 0 | 0 | 0 | 0 | 0 | 0 | 0 | 0 | 0 |

|         |          |         |   |   |   |   |   |   |   |   |   |   |   |   |   |
|---------|----------|---------|---|---|---|---|---|---|---|---|---|---|---|---|---|
| 55.0320 | -1.9470  | 13.9400 | H | 0 | 0 | 0 | 0 | 0 | 0 | 0 | 0 | 0 | 0 | 0 | 0 |
| 55.6330 | -2.6260  | 12.0130 | C | 0 | 0 | 0 | 0 | 0 | 0 | 0 | 0 | 0 | 0 | 0 | 0 |
| 55.0080 | -3.5260  | 12.0100 | H | 0 | 0 | 0 | 0 | 0 | 0 | 0 | 0 | 0 | 0 | 0 | 0 |
| 55.7070 | -2.2860  | 10.9730 | H | 0 | 0 | 0 | 0 | 0 | 0 | 0 | 0 | 0 | 0 | 0 | 0 |
| 57.0130 | -2.9980  | 12.4700 | C | 0 | 0 | 0 | 0 | 0 | 0 | 0 | 0 | 0 | 0 | 0 | 0 |
| 56.9640 | -3.6620  | 13.6570 | O | 0 | 0 | 0 | 0 | 0 | 0 | 0 | 0 | 0 | 0 | 0 | 0 |
| 58.0300 | -2.7320  | 11.8450 | O | 0 | 0 | 0 | 0 | 0 | 0 | 0 | 0 | 0 | 0 | 0 | 0 |
| 58.7310 | -5.3410  | 13.5820 | C | 0 | 0 | 0 | 0 | 0 | 0 | 0 | 0 | 0 | 0 | 0 | 0 |
| 57.9700 | -6.1210  | 13.6970 | H | 0 | 0 | 0 | 0 | 0 | 0 | 0 | 0 | 0 | 0 | 0 | 0 |
| 58.9020 | -5.1990  | 12.5090 | H | 0 | 0 | 0 | 0 | 0 | 0 | 0 | 0 | 0 | 0 | 0 | 0 |
| 59.9450 | -5.7220  | 14.2230 | O | 0 | 0 | 0 | 0 | 0 | 0 | 0 | 0 | 0 | 0 | 0 | 0 |
| 60.5280 | -6.8980  | 13.6600 | C | 0 | 0 | 0 | 0 | 0 | 0 | 0 | 0 | 0 | 0 | 0 | 0 |
| 60.4570 | -6.8740  | 12.5660 | H | 0 | 0 | 0 | 0 | 0 | 0 | 0 | 0 | 0 | 0 | 0 | 0 |
| 61.5930 | -6.8770  | 13.9150 | H | 0 | 0 | 0 | 0 | 0 | 0 | 0 | 0 | 0 | 0 | 0 | 0 |
| 59.8990 | -8.1640  | 14.2390 | C | 0 | 0 | 0 | 0 | 0 | 0 | 0 | 0 | 0 | 0 | 0 | 0 |
| 60.0470 | -8.1760  | 15.3260 | H | 0 | 0 | 0 | 0 | 0 | 0 | 0 | 0 | 0 | 0 | 0 | 0 |
| 58.8140 | -8.1510  | 14.0850 | H | 0 | 0 | 0 | 0 | 0 | 0 | 0 | 0 | 0 | 0 | 0 | 0 |
| 60.4880 | -9.4260  | 13.6070 | C | 0 | 0 | 0 | 0 | 0 | 0 | 0 | 0 | 0 | 0 | 0 | 0 |
| 60.3240 | -9.3960  | 12.5230 | H | 0 | 0 | 0 | 0 | 0 | 0 | 0 | 0 | 0 | 0 | 0 | 0 |
| 61.5730 | -9.4530  | 13.7680 | H | 0 | 0 | 0 | 0 | 0 | 0 | 0 | 0 | 0 | 0 | 0 | 0 |
| 59.8520 | -10.6910 | 14.1880 | C | 0 | 0 | 0 | 0 | 0 | 0 | 0 | 0 | 0 | 0 | 0 | 0 |
| 60.1020 | -10.7730 | 15.2520 | H | 0 | 0 | 0 | 0 | 0 | 0 | 0 | 0 | 0 | 0 | 0 | 0 |
| 58.7600 | -10.6150 | 14.1170 | H | 0 | 0 | 0 | 0 | 0 | 0 | 0 | 0 | 0 | 0 | 0 | 0 |
| 60.3170 | -11.9450 | 13.4480 | C | 0 | 0 | 0 | 0 | 0 | 0 | 0 | 0 | 0 | 0 | 0 | 0 |
| 60.0880 | -11.8540 | 12.3790 | H | 0 | 0 | 0 | 0 | 0 | 0 | 0 | 0 | 0 | 0 | 0 | 0 |
| 61.4070 | -12.0450 | 13.5110 | H | 0 | 0 | 0 | 0 | 0 | 0 | 0 | 0 | 0 | 0 | 0 | 0 |
| 59.6620 | -13.2030 | 14.0120 | C | 0 | 0 | 0 | 0 | 0 | 0 | 0 | 0 | 0 | 0 | 0 | 0 |
| 60.0670 | -13.4110 | 15.0090 | H | 0 | 0 | 0 | 0 | 0 | 0 | 0 | 0 | 0 | 0 | 0 | 0 |
| 58.5780 | -13.0740 | 14.1200 | H | 0 | 0 | 0 | 0 | 0 | 0 | 0 | 0 | 0 | 0 | 0 | 0 |
| 59.9780 | -14.3220 | 13.1810 | O | 0 | 0 | 0 | 0 | 0 | 0 | 0 | 0 | 0 | 0 | 0 | 0 |
| 58.8520 | -14.8710 | 12.4980 | C | 0 | 0 | 0 | 0 | 0 | 0 | 0 | 0 | 0 | 0 | 0 | 0 |
| 58.0370 | -15.0750 | 13.2040 | H | 0 | 0 | 0 | 0 | 0 | 0 | 0 | 0 | 0 | 0 | 0 | 0 |
| 59.1550 | -15.8500 | 12.1070 | H | 0 | 0 | 0 | 0 | 0 | 0 | 0 | 0 | 0 | 0 | 0 | 0 |
| 56.4110 | -19.3830 | 2.4620  | O | 0 | 0 | 0 | 0 | 0 | 0 | 0 | 0 | 0 | 0 | 0 | 0 |
| 55.7230 | -19.8050 | 1.9200  | H | 0 | 0 | 0 | 0 | 0 | 0 | 0 | 0 | 0 | 0 | 0 | 0 |
| 55.8270 | -19.0710 | 3.7210  | C | 0 | 0 | 0 | 0 | 0 | 0 | 0 | 0 | 0 | 0 | 0 | 0 |
| 54.9650 | -18.4190 | 3.5490  | H | 0 | 0 | 0 | 0 | 0 | 0 | 0 | 0 | 0 | 0 | 0 | 0 |
| 55.4850 | -20.0000 | 4.1870  | H | 0 | 0 | 0 | 0 | 0 | 0 | 0 | 0 | 0 | 0 | 0 | 0 |
| 56.8670 | -18.3770 | 4.5940  | C | 0 | 0 | 0 | 0 | 0 | 0 | 0 | 0 | 0 | 0 | 0 | 0 |
| 57.7260 | -19.0440 | 4.7390  | H | 0 | 0 | 0 | 0 | 0 | 0 | 0 | 0 | 0 | 0 | 0 | 0 |
| 57.2550 | -17.5010 | 4.0600  | H | 0 | 0 | 0 | 0 | 0 | 0 | 0 | 0 | 0 | 0 | 0 | 0 |
| 56.2880 | -17.9560 | 5.9480  | C | 0 | 0 | 0 | 0 | 0 | 0 | 0 | 0 | 0 | 0 | 0 | 0 |
| 55.4080 | -17.3290 | 5.7690  | H | 0 | 0 | 0 | 0 | 0 | 0 | 0 | 0 | 0 | 0 | 0 | 0 |
| 55.9520 | -18.8460 | 6.4910  | H | 0 | 0 | 0 | 0 | 0 | 0 | 0 | 0 | 0 | 0 | 0 | 0 |
| 57.3300 | -17.1880 | 6.7800  | C | 0 | 0 | 0 | 0 | 0 | 0 | 0 | 0 | 0 | 0 | 0 | 0 |
| 58.2010 | -17.8320 | 6.9480  | H | 0 | 0 | 0 | 0 | 0 | 0 | 0 | 0 | 0 | 0 | 0 | 0 |
| 57.7200 | -16.3570 | 6.1770  | H | 0 | 0 | 0 | 0 | 0 | 0 | 0 | 0 | 0 | 0 | 0 | 0 |
| 56.8700 | -16.6350 | 8.0680  | N | 0 | 0 | 3 | 0 | 0 | 0 | 0 | 0 | 0 | 0 | 0 | 0 |
| 66.4440 | -12.6110 | 17.7460 | C | 0 | 0 | 0 | 0 | 0 | 0 | 0 | 0 | 0 | 0 | 0 | 0 |
| 66.0070 | -11.8120 | 17.1340 | H | 0 | 0 | 0 | 0 | 0 | 0 | 0 | 0 | 0 | 0 | 0 | 0 |
| 66.5740 | -13.4660 | 17.0740 | H | 0 | 0 | 0 | 0 | 0 | 0 | 0 | 0 | 0 | 0 | 0 | 0 |
| 67.7530 | -12.2570 | 18.2200 | O | 0 | 0 | 0 | 0 | 0 | 0 | 0 | 0 | 0 | 0 | 0 | 0 |
| 67.9180 | -10.9560 | 18.5960 | C | 0 | 0 | 0 | 0 | 0 | 0 | 0 | 0 | 0 | 0 | 0 | 0 |
| 69.3440 | -10.7460 | 19.0470 | C | 0 | 0 | 0 | 0 | 0 | 0 | 0 | 0 | 0 | 0 | 0 | 0 |
| 69.5430 | -11.4160 | 19.8900 | H | 0 | 0 | 0 | 0 | 0 | 0 | 0 | 0 | 0 | 0 | 0 | 0 |
| 70.0110 | -11.0030 | 18.2180 | H | 0 | 0 | 0 | 0 | 0 | 0 | 0 | 0 | 0 | 0 | 0 | 0 |
| 69.6020 | -9.3110  | 19.4730 | C | 0 | 0 | 0 | 0 | 0 | 0 | 0 | 0 | 0 | 0 | 0 | 0 |
| 69.4140 | -8.6160  | 18.6480 | H | 0 | 0 | 0 | 0 | 0 | 0 | 0 | 0 | 0 | 0 | 0 | 0 |
| 70.6410 | -9.1890  | 19.7930 | H | 0 | 0 | 0 | 0 | 0 | 0 | 0 | 0 | 0 | 0 | 0 | 0 |
| 68.9510 | -9.0250  | 20.3060 | H | 0 | 0 | 0 | 0 | 0 | 0 | 0 | 0 | 0 | 0 | 0 | 0 |
| 67.0460 | -10.0990 | 18.5760 | O | 0 | 0 | 0 | 0 | 0 | 0 | 0 | 0 | 0 | 0 | 0 | 0 |
| 58.6860 | -19.9940 | 12.7030 | C | 0 | 0 | 0 | 0 | 0 | 0 | 0 | 0 | 0 | 0 | 0 | 0 |
| 57.7950 | -20.5840 | 12.9490 | H | 0 | 0 | 0 | 0 | 0 | 0 | 0 | 0 | 0 | 0 | 0 | 0 |
| 59.5420 | -20.6630 | 12.8420 | H | 0 | 0 | 0 | 0 | 0 | 0 | 0 | 0 | 0 | 0 | 0 | 0 |
| 56.5110 | -17.6480 | 9.0740  | C | 0 | 0 | 0 | 0 | 0 | 0 | 0 | 0 | 0 | 0 | 0 | 0 |
| 56.1670 | -17.1430 | 9.9820  | H | 0 | 0 | 0 | 0 | 0 | 0 | 0 | 0 | 0 | 0 | 0 | 0 |
| 55.6710 | -18.2670 | 8.7370  | H | 0 | 0 | 0 | 0 | 0 | 0 | 0 | 0 | 0 | 0 | 0 | 0 |
| 57.6950 | -18.5370 | 9.4700  | C | 0 | 0 | 0 | 0 | 0 | 0 | 0 | 0 | 0 | 0 | 0 | 0 |
| 57.8400 | -19.3470 | 8.7470  | H | 0 | 0 | 0 | 0 | 0 | 0 | 0 | 0 | 0 | 0 | 0 | 0 |
| 58.6070 | -17.9290 | 9.5160  | H | 0 | 0 | 0 | 0 | 0 | 0 | 0 | 0 | 0 | 0 | 0 | 0 |
| 57.4870 | -19.1390 | 10.8400 | C | 0 | 0 | 0 | 0 | 0 | 0 | 0 | 0 | 0 | 0 | 0 | 0 |
| 58.6840 | -19.5740 | 11.3290 | O | 0 | 0 | 0 | 0 | 0 | 0 | 0 | 0 | 0 | 0 | 0 | 0 |
| 56.4190 | -19.2030 | 11.4310 | O | 0 | 0 | 0 | 0 | 0 | 0 | 0 | 0 | 0 | 0 | 0 | 0 |
| 58.8260 | -18.7760 | 13.6090 | C | 0 | 0 | 0 | 0 | 0 | 0 | 0 | 0 | 0 | 0 | 0 | 0 |
| 59.7020 | -18.1970 | 13.2980 | H | 0 | 0 | 0 | 0 | 0 | 0 | 0 | 0 | 0 | 0 | 0 | 0 |
| 57.9490 | -18.1270 | 13.5030 | H | 0 | 0 | 0 | 0 | 0 | 0 | 0 | 0 | 0 | 0 | 0 | 0 |
| 58.9500 | -19.1930 | 14.9660 | O | 0 | 0 | 0 | 0 | 0 | 0 | 0 | 0 | 0 | 0 | 0 | 0 |
| 59.1520 | -18.0920 | 15.8550 | C | 0 | 0 | 0 | 0 | 0 | 0 | 0 | 0 | 0 | 0 | 0 | 0 |
| 58.5260 | -17.2400 | 15.5610 | H | 0 | 0 | 0 | 0 | 0 | 0 | 0 | 0 | 0 | 0 | 0 | 0 |
| 58.8160 | -18.4150 | 16.8460 | H | 0 | 0 | 0 | 0 | 0 | 0 | 0 | 0 | 0 | 0 | 0 | 0 |
| 60.6310 | -17.7100 | 15.9240 | C | 0 | 0 | 0 | 0 | 0 | 0 | 0 | 0 | 0 | 0 | 0 | 0 |

|         |          |         |   |   |   |   |   |   |   |   |   |   |   |   |   |
|---------|----------|---------|---|---|---|---|---|---|---|---|---|---|---|---|---|
| 61.2030 | -18.5660 | 16.3010 | H | 0 | 0 | 0 | 0 | 0 | 0 | 0 | 0 | 0 | 0 | 0 | 0 |
| 61.0200 | -17.5110 | 14.9200 | H | 0 | 0 | 0 | 0 | 0 | 0 | 0 | 0 | 0 | 0 | 0 | 0 |
| 60.8610 | -16.4840 | 16.8080 | C | 0 | 0 | 0 | 0 | 0 | 0 | 0 | 0 | 0 | 0 | 0 | 0 |
| 60.3050 | -15.6320 | 16.3990 | H | 0 | 0 | 0 | 0 | 0 | 0 | 0 | 0 | 0 | 0 | 0 | 0 |
| 60.4700 | -16.6730 | 17.8150 | H | 0 | 0 | 0 | 0 | 0 | 0 | 0 | 0 | 0 | 0 | 0 | 0 |
| 62.3490 | -16.1350 | 16.8940 | C | 0 | 0 | 0 | 0 | 0 | 0 | 0 | 0 | 0 | 0 | 0 | 0 |
| 62.8890 | -16.9620 | 17.3720 | H | 0 | 0 | 0 | 0 | 0 | 0 | 0 | 0 | 0 | 0 | 0 | 0 |
| 62.7610 | -16.0220 | 15.8840 | H | 0 | 0 | 0 | 0 | 0 | 0 | 0 | 0 | 0 | 0 | 0 | 0 |
| 62.5800 | -14.8450 | 17.6790 | C | 0 | 0 | 0 | 0 | 0 | 0 | 0 | 0 | 0 | 0 | 0 | 0 |
| 62.0810 | -14.0050 | 17.1790 | H | 0 | 0 | 0 | 0 | 0 | 0 | 0 | 0 | 0 | 0 | 0 | 0 |
| 62.1240 | -14.9160 | 18.6740 | H | 0 | 0 | 0 | 0 | 0 | 0 | 0 | 0 | 0 | 0 | 0 | 0 |
| 64.0670 | -14.5360 | 17.8310 | C | 0 | 0 | 0 | 0 | 0 | 0 | 0 | 0 | 0 | 0 | 0 | 0 |
| 64.5550 | -15.3240 | 18.4160 | H | 0 | 0 | 0 | 0 | 0 | 0 | 0 | 0 | 0 | 0 | 0 | 0 |
| 64.5390 | -14.4760 | 16.8450 | H | 0 | 0 | 0 | 0 | 0 | 0 | 0 | 0 | 0 | 0 | 0 | 0 |
| 64.1960 | -13.2800 | 18.4960 | O | 0 | 0 | 0 | 0 | 0 | 0 | 0 | 0 | 0 | 0 | 0 | 0 |
| 65.5300 | -12.9850 | 18.9100 | C | 0 | 0 | 0 | 0 | 0 | 0 | 0 | 0 | 0 | 0 | 0 | 0 |
| 65.9480 | -13.8210 | 19.4850 | H | 0 | 0 | 0 | 0 | 0 | 0 | 0 | 0 | 0 | 0 | 0 | 0 |
| 65.4680 | -12.1440 | 19.6100 | H | 0 | 0 | 0 | 0 | 0 | 0 | 0 | 0 | 0 | 0 | 0 | 0 |
| 1       | 2        | 1       | 0 | 0 | 0 | 0 |   |   |   |   |   |   |   |   |   |
| 1       | 3        | 1       | 0 | 0 | 0 | 0 |   |   |   |   |   |   |   |   |   |
| 3       | 4        | 1       | 0 | 0 | 0 | 0 |   |   |   |   |   |   |   |   |   |
| 3       | 5        | 1       | 0 | 0 | 0 | 0 |   |   |   |   |   |   |   |   |   |
| 3       | 6        | 1       | 0 | 0 | 0 | 0 |   |   |   |   |   |   |   |   |   |
| 6       | 7        | 1       | 0 | 0 | 0 | 0 |   |   |   |   |   |   |   |   |   |
| 6       | 8        | 1       | 0 | 0 | 0 | 0 |   |   |   |   |   |   |   |   |   |
| 6       | 9        | 1       | 0 | 0 | 0 | 0 |   |   |   |   |   |   |   |   |   |
| 9       | 10       | 1       | 0 | 0 | 0 | 0 |   |   |   |   |   |   |   |   |   |
| 9       | 11       | 1       | 0 | 0 | 0 | 0 |   |   |   |   |   |   |   |   |   |
| 9       | 12       | 1       | 0 | 0 | 0 | 0 |   |   |   |   |   |   |   |   |   |
| 12      | 13       | 1       | 0 | 0 | 0 | 0 |   |   |   |   |   |   |   |   |   |
| 12      | 14       | 1       | 0 | 0 | 0 | 0 |   |   |   |   |   |   |   |   |   |
| 12      | 15       | 1       | 0 | 0 | 0 | 0 |   |   |   |   |   |   |   |   |   |
| 15      | 16       | 1       | 0 | 0 | 0 | 0 |   |   |   |   |   |   |   |   |   |
| 15      | 32       | 1       | 0 | 0 | 0 | 0 |   |   |   |   |   |   |   |   |   |
| 17      | 18       | 1       | 0 | 0 | 0 | 0 |   |   |   |   |   |   |   |   |   |
| 17      | 19       | 1       | 0 | 0 | 0 | 0 |   |   |   |   |   |   |   |   |   |
| 17      | 20       | 1       | 0 | 0 | 0 | 0 |   |   |   |   |   |   |   |   |   |
| 17      | 64       | 1       | 0 | 0 | 0 | 0 |   |   |   |   |   |   |   |   |   |
| 20      | 21       | 1       | 0 | 0 | 0 | 0 |   |   |   |   |   |   |   |   |   |
| 21      | 22       | 1       | 0 | 0 | 0 | 0 |   |   |   |   |   |   |   |   |   |
| 21      | 28       | 2       | 0 | 0 | 0 | 0 |   |   |   |   |   |   |   |   |   |
| 22      | 23       | 1       | 0 | 0 | 0 | 0 |   |   |   |   |   |   |   |   |   |
| 22      | 24       | 1       | 0 | 0 | 0 | 0 |   |   |   |   |   |   |   |   |   |
| 22      | 25       | 1       | 0 | 0 | 0 | 0 |   |   |   |   |   |   |   |   |   |
| 25      | 26       | 1       | 0 | 0 | 0 | 0 |   |   |   |   |   |   |   |   |   |
| 25      | 27       | 1       | 0 | 0 | 0 | 0 |   |   |   |   |   |   |   |   |   |
| 25      | 81       | 1       | 0 | 0 | 0 | 0 |   |   |   |   |   |   |   |   |   |
| 29      | 30       | 1       | 0 | 0 | 0 | 0 |   |   |   |   |   |   |   |   |   |
| 29      | 31       | 1       | 0 | 0 | 0 | 0 |   |   |   |   |   |   |   |   |   |
| 29      | 39       | 1       | 0 | 0 | 0 | 0 |   |   |   |   |   |   |   |   |   |
| 29      | 41       | 1       | 0 | 0 | 0 | 0 |   |   |   |   |   |   |   |   |   |
| 32      | 33       | 1       | 0 | 0 | 0 | 0 |   |   |   |   |   |   |   |   |   |
| 32      | 34       | 1       | 0 | 0 | 0 | 0 |   |   |   |   |   |   |   |   |   |
| 32      | 35       | 1       | 0 | 0 | 0 | 0 |   |   |   |   |   |   |   |   |   |
| 35      | 36       | 1       | 0 | 0 | 0 | 0 |   |   |   |   |   |   |   |   |   |
| 35      | 37       | 1       | 0 | 0 | 0 | 0 |   |   |   |   |   |   |   |   |   |
| 35      | 38       | 1       | 0 | 0 | 0 | 0 |   |   |   |   |   |   |   |   |   |
| 38      | 39       | 1       | 0 | 0 | 0 | 0 |   |   |   |   |   |   |   |   |   |
| 38      | 40       | 2       | 0 | 0 | 0 | 0 |   |   |   |   |   |   |   |   |   |
| 41      | 42       | 1       | 0 | 0 | 0 | 0 |   |   |   |   |   |   |   |   |   |
| 41      | 43       | 1       | 0 | 0 | 0 | 0 |   |   |   |   |   |   |   |   |   |
| 41      | 44       | 1       | 0 | 0 | 0 | 0 |   |   |   |   |   |   |   |   |   |
| 44      | 45       | 1       | 0 | 0 | 0 | 0 |   |   |   |   |   |   |   |   |   |
| 45      | 46       | 1       | 0 | 0 | 0 | 0 |   |   |   |   |   |   |   |   |   |
| 45      | 47       | 1       | 0 | 0 | 0 | 0 |   |   |   |   |   |   |   |   |   |
| 45      | 48       | 1       | 0 | 0 | 0 | 0 |   |   |   |   |   |   |   |   |   |
| 48      | 49       | 1       | 0 | 0 | 0 | 0 |   |   |   |   |   |   |   |   |   |
| 48      | 50       | 1       | 0 | 0 | 0 | 0 |   |   |   |   |   |   |   |   |   |
| 48      | 51       | 1       | 0 | 0 | 0 | 0 |   |   |   |   |   |   |   |   |   |
| 51      | 52       | 1       | 0 | 0 | 0 | 0 |   |   |   |   |   |   |   |   |   |
| 51      | 53       | 1       | 0 | 0 | 0 | 0 |   |   |   |   |   |   |   |   |   |
| 51      | 54       | 1       | 0 | 0 | 0 | 0 |   |   |   |   |   |   |   |   |   |
| 54      | 55       | 1       | 0 | 0 | 0 | 0 |   |   |   |   |   |   |   |   |   |
| 54      | 56       | 1       | 0 | 0 | 0 | 0 |   |   |   |   |   |   |   |   |   |
| 54      | 57       | 1       | 0 | 0 | 0 | 0 |   |   |   |   |   |   |   |   |   |
| 57      | 58       | 1       | 0 | 0 | 0 | 0 |   |   |   |   |   |   |   |   |   |
| 57      | 59       | 1       | 0 | 0 | 0 | 0 |   |   |   |   |   |   |   |   |   |
| 57      | 60       | 1       | 0 | 0 | 0 | 0 |   |   |   |   |   |   |   |   |   |
| 60      | 61       | 1       | 0 | 0 | 0 | 0 |   |   |   |   |   |   |   |   |   |
| 60      | 62       | 1       | 0 | 0 | 0 | 0 |   |   |   |   |   |   |   |   |   |
| 60      | 63       | 1       | 0 | 0 | 0 | 0 |   |   |   |   |   |   |   |   |   |

|     |     |   |   |   |   |   |
|-----|-----|---|---|---|---|---|
| 63  | 64  | 1 | 0 | 0 | 0 | 0 |
| 64  | 65  | 1 | 0 | 0 | 0 | 0 |
| 64  | 66  | 1 | 0 | 0 | 0 | 0 |
| 67  | 68  | 1 | 0 | 0 | 0 | 0 |
| 67  | 69  | 1 | 0 | 0 | 0 | 0 |
| 69  | 70  | 1 | 0 | 0 | 0 | 0 |
| 69  | 71  | 1 | 0 | 0 | 0 | 0 |
| 69  | 72  | 1 | 0 | 0 | 0 | 0 |
| 72  | 73  | 1 | 0 | 0 | 0 | 0 |
| 72  | 74  | 1 | 0 | 0 | 0 | 0 |
| 72  | 75  | 1 | 0 | 0 | 0 | 0 |
| 75  | 76  | 1 | 0 | 0 | 0 | 0 |
| 75  | 77  | 1 | 0 | 0 | 0 | 0 |
| 75  | 78  | 1 | 0 | 0 | 0 | 0 |
| 78  | 79  | 1 | 0 | 0 | 0 | 0 |
| 78  | 80  | 1 | 0 | 0 | 0 | 0 |
| 78  | 81  | 1 | 0 | 0 | 0 | 0 |
| 81  | 97  | 1 | 0 | 0 | 0 | 0 |
| 82  | 83  | 1 | 0 | 0 | 0 | 0 |
| 82  | 84  | 1 | 0 | 0 | 0 | 0 |
| 82  | 85  | 1 | 0 | 0 | 0 | 0 |
| 82  | 129 | 1 | 0 | 0 | 0 | 0 |
| 85  | 86  | 1 | 0 | 0 | 0 | 0 |
| 86  | 87  | 1 | 0 | 0 | 0 | 0 |
| 86  | 93  | 2 | 0 | 0 | 0 | 0 |
| 87  | 88  | 1 | 0 | 0 | 0 | 0 |
| 87  | 89  | 1 | 0 | 0 | 0 | 0 |
| 87  | 90  | 1 | 0 | 0 | 0 | 0 |
| 90  | 91  | 1 | 0 | 0 | 0 | 0 |
| 90  | 92  | 1 | 0 | 0 | 0 | 0 |
| 90  | 146 | 1 | 0 | 0 | 0 | 0 |
| 94  | 95  | 1 | 0 | 0 | 0 | 0 |
| 94  | 96  | 1 | 0 | 0 | 0 | 0 |
| 94  | 104 | 1 | 0 | 0 | 0 | 0 |
| 94  | 106 | 1 | 0 | 0 | 0 | 0 |
| 97  | 98  | 1 | 0 | 0 | 0 | 0 |
| 97  | 99  | 1 | 0 | 0 | 0 | 0 |
| 97  | 100 | 1 | 0 | 0 | 0 | 0 |
| 100 | 101 | 1 | 0 | 0 | 0 | 0 |
| 100 | 102 | 1 | 0 | 0 | 0 | 0 |
| 100 | 103 | 1 | 0 | 0 | 0 | 0 |
| 103 | 104 | 1 | 0 | 0 | 0 | 0 |
| 103 | 105 | 2 | 0 | 0 | 0 | 0 |
| 106 | 107 | 1 | 0 | 0 | 0 | 0 |
| 106 | 108 | 1 | 0 | 0 | 0 | 0 |
| 106 | 109 | 1 | 0 | 0 | 0 | 0 |
| 109 | 110 | 1 | 0 | 0 | 0 | 0 |
| 110 | 111 | 1 | 0 | 0 | 0 | 0 |
| 110 | 112 | 1 | 0 | 0 | 0 | 0 |
| 110 | 113 | 1 | 0 | 0 | 0 | 0 |
| 113 | 114 | 1 | 0 | 0 | 0 | 0 |
| 113 | 115 | 1 | 0 | 0 | 0 | 0 |
| 113 | 116 | 1 | 0 | 0 | 0 | 0 |
| 116 | 117 | 1 | 0 | 0 | 0 | 0 |
| 116 | 118 | 1 | 0 | 0 | 0 | 0 |
| 116 | 119 | 1 | 0 | 0 | 0 | 0 |
| 119 | 120 | 1 | 0 | 0 | 0 | 0 |
| 119 | 121 | 1 | 0 | 0 | 0 | 0 |
| 119 | 122 | 1 | 0 | 0 | 0 | 0 |
| 122 | 123 | 1 | 0 | 0 | 0 | 0 |
| 122 | 124 | 1 | 0 | 0 | 0 | 0 |
| 122 | 125 | 1 | 0 | 0 | 0 | 0 |
| 125 | 126 | 1 | 0 | 0 | 0 | 0 |
| 125 | 127 | 1 | 0 | 0 | 0 | 0 |
| 125 | 128 | 1 | 0 | 0 | 0 | 0 |
| 128 | 129 | 1 | 0 | 0 | 0 | 0 |
| 129 | 130 | 1 | 0 | 0 | 0 | 0 |
| 129 | 131 | 1 | 0 | 0 | 0 | 0 |
| 132 | 133 | 1 | 0 | 0 | 0 | 0 |
| 132 | 134 | 1 | 0 | 0 | 0 | 0 |
| 134 | 135 | 1 | 0 | 0 | 0 | 0 |
| 134 | 136 | 1 | 0 | 0 | 0 | 0 |
| 134 | 137 | 1 | 0 | 0 | 0 | 0 |
| 137 | 138 | 1 | 0 | 0 | 0 | 0 |
| 137 | 139 | 1 | 0 | 0 | 0 | 0 |
| 137 | 140 | 1 | 0 | 0 | 0 | 0 |
| 140 | 141 | 1 | 0 | 0 | 0 | 0 |
| 140 | 142 | 1 | 0 | 0 | 0 | 0 |
| 140 | 143 | 1 | 0 | 0 | 0 | 0 |
| 143 | 144 | 1 | 0 | 0 | 0 | 0 |
| 143 | 145 | 1 | 0 | 0 | 0 | 0 |



|        |   |   |   |   |   |
|--------|---|---|---|---|---|
| 143146 | 1 | 0 | 0 | 0 | 0 |
| 146162 | 1 | 0 | 0 | 0 | 0 |
| 147148 | 1 | 0 | 0 | 0 | 0 |
| 147149 | 1 | 0 | 0 | 0 | 0 |
| 147150 | 1 | 0 | 0 | 0 | 0 |
| 147194 | 1 | 0 | 0 | 0 | 0 |
| 150151 | 1 | 0 | 0 | 0 | 0 |
| 151152 | 1 | 0 | 0 | 0 | 0 |
| 151158 | 2 | 0 | 0 | 0 | 0 |
| 152153 | 1 | 0 | 0 | 0 | 0 |
| 152154 | 1 | 0 | 0 | 0 | 0 |
| 152155 | 1 | 0 | 0 | 0 | 0 |
| 155156 | 1 | 0 | 0 | 0 | 0 |
| 155157 | 1 | 0 | 0 | 0 | 0 |
| 155211 | 1 | 0 | 0 | 0 | 0 |
| 159160 | 1 | 0 | 0 | 0 | 0 |
| 159161 | 1 | 0 | 0 | 0 | 0 |
| 159169 | 1 | 0 | 0 | 0 | 0 |
| 159171 | 1 | 0 | 0 | 0 | 0 |
| 162163 | 1 | 0 | 0 | 0 | 0 |
| 162164 | 1 | 0 | 0 | 0 | 0 |
| 162165 | 1 | 0 | 0 | 0 | 0 |
| 165166 | 1 | 0 | 0 | 0 | 0 |
| 165167 | 1 | 0 | 0 | 0 | 0 |
| 165168 | 1 | 0 | 0 | 0 | 0 |
| 168169 | 1 | 0 | 0 | 0 | 0 |
| 168170 | 2 | 0 | 0 | 0 | 0 |
| 171172 | 1 | 0 | 0 | 0 | 0 |
| 171173 | 1 | 0 | 0 | 0 | 0 |
| 171174 | 1 | 0 | 0 | 0 | 0 |
| 174175 | 1 | 0 | 0 | 0 | 0 |
| 175176 | 1 | 0 | 0 | 0 | 0 |
| 175177 | 1 | 0 | 0 | 0 | 0 |
| 175178 | 1 | 0 | 0 | 0 | 0 |
| 178179 | 1 | 0 | 0 | 0 | 0 |
| 178180 | 1 | 0 | 0 | 0 | 0 |
| 178181 | 1 | 0 | 0 | 0 | 0 |
| 181182 | 1 | 0 | 0 | 0 | 0 |
| 181183 | 1 | 0 | 0 | 0 | 0 |
| 181184 | 1 | 0 | 0 | 0 | 0 |
| 184185 | 1 | 0 | 0 | 0 | 0 |
| 184186 | 1 | 0 | 0 | 0 | 0 |
| 184187 | 1 | 0 | 0 | 0 | 0 |
| 187188 | 1 | 0 | 0 | 0 | 0 |
| 187189 | 1 | 0 | 0 | 0 | 0 |
| 187190 | 1 | 0 | 0 | 0 | 0 |
| 190191 | 1 | 0 | 0 | 0 | 0 |
| 190192 | 1 | 0 | 0 | 0 | 0 |
| 190193 | 1 | 0 | 0 | 0 | 0 |
| 193194 | 1 | 0 | 0 | 0 | 0 |
| 194195 | 1 | 0 | 0 | 0 | 0 |
| 194196 | 1 | 0 | 0 | 0 | 0 |
| 197198 | 1 | 0 | 0 | 0 | 0 |
| 197199 | 1 | 0 | 0 | 0 | 0 |
| 199200 | 1 | 0 | 0 | 0 | 0 |
| 199201 | 1 | 0 | 0 | 0 | 0 |
| 199202 | 1 | 0 | 0 | 0 | 0 |
| 202203 | 1 | 0 | 0 | 0 | 0 |
| 202204 | 1 | 0 | 0 | 0 | 0 |
| 202205 | 1 | 0 | 0 | 0 | 0 |
| 205206 | 1 | 0 | 0 | 0 | 0 |
| 205207 | 1 | 0 | 0 | 0 | 0 |
| 205208 | 1 | 0 | 0 | 0 | 0 |
| 208209 | 1 | 0 | 0 | 0 | 0 |
| 208210 | 1 | 0 | 0 | 0 | 0 |
| 208211 | 1 | 0 | 0 | 0 | 0 |
| 211227 | 1 | 0 | 0 | 0 | 0 |
| 212213 | 1 | 0 | 0 | 0 | 0 |
| 212214 | 1 | 0 | 0 | 0 | 0 |
| 212215 | 1 | 0 | 0 | 0 | 0 |
| 212259 | 1 | 0 | 0 | 0 | 0 |
| 215216 | 1 | 0 | 0 | 0 | 0 |
| 216217 | 1 | 0 | 0 | 0 | 0 |
| 216223 | 2 | 0 | 0 | 0 | 0 |
| 217218 | 1 | 0 | 0 | 0 | 0 |
| 217219 | 1 | 0 | 0 | 0 | 0 |
| 217220 | 1 | 0 | 0 | 0 | 0 |
| 220221 | 1 | 0 | 0 | 0 | 0 |
| 220222 | 1 | 0 | 0 | 0 | 0 |
| 220276 | 1 | 0 | 0 | 0 | 0 |
| 224225 | 1 | 0 | 0 | 0 | 0 |

|        |   |   |   |   |   |
|--------|---|---|---|---|---|
| 224226 | 1 | 0 | 0 | 0 | 0 |
| 224234 | 1 | 0 | 0 | 0 | 0 |
| 224236 | 1 | 0 | 0 | 0 | 0 |
| 227228 | 1 | 0 | 0 | 0 | 0 |
| 227229 | 1 | 0 | 0 | 0 | 0 |
| 227230 | 1 | 0 | 0 | 0 | 0 |
| 230231 | 1 | 0 | 0 | 0 | 0 |
| 230232 | 1 | 0 | 0 | 0 | 0 |
| 230233 | 1 | 0 | 0 | 0 | 0 |
| 233234 | 1 | 0 | 0 | 0 | 0 |
| 233235 | 2 | 0 | 0 | 0 | 0 |
| 236237 | 1 | 0 | 0 | 0 | 0 |
| 236238 | 1 | 0 | 0 | 0 | 0 |
| 236239 | 1 | 0 | 0 | 0 | 0 |
| 239240 | 1 | 0 | 0 | 0 | 0 |
| 240241 | 1 | 0 | 0 | 0 | 0 |
| 240242 | 1 | 0 | 0 | 0 | 0 |
| 240243 | 1 | 0 | 0 | 0 | 0 |
| 243244 | 1 | 0 | 0 | 0 | 0 |
| 243245 | 1 | 0 | 0 | 0 | 0 |
| 243246 | 1 | 0 | 0 | 0 | 0 |
| 246247 | 1 | 0 | 0 | 0 | 0 |
| 246248 | 1 | 0 | 0 | 0 | 0 |
| 246249 | 1 | 0 | 0 | 0 | 0 |
| 249250 | 1 | 0 | 0 | 0 | 0 |
| 249251 | 1 | 0 | 0 | 0 | 0 |
| 249252 | 1 | 0 | 0 | 0 | 0 |
| 252253 | 1 | 0 | 0 | 0 | 0 |
| 252254 | 1 | 0 | 0 | 0 | 0 |
| 252255 | 1 | 0 | 0 | 0 | 0 |
| 255256 | 1 | 0 | 0 | 0 | 0 |
| 255257 | 1 | 0 | 0 | 0 | 0 |
| 255258 | 1 | 0 | 0 | 0 | 0 |
| 258259 | 1 | 0 | 0 | 0 | 0 |
| 259260 | 1 | 0 | 0 | 0 | 0 |
| 259261 | 1 | 0 | 0 | 0 | 0 |
| 262263 | 1 | 0 | 0 | 0 | 0 |
| 262264 | 1 | 0 | 0 | 0 | 0 |
| 264265 | 1 | 0 | 0 | 0 | 0 |
| 264266 | 1 | 0 | 0 | 0 | 0 |
| 264267 | 1 | 0 | 0 | 0 | 0 |
| 267268 | 1 | 0 | 0 | 0 | 0 |
| 267269 | 1 | 0 | 0 | 0 | 0 |
| 267270 | 1 | 0 | 0 | 0 | 0 |
| 270271 | 1 | 0 | 0 | 0 | 0 |
| 270272 | 1 | 0 | 0 | 0 | 0 |
| 270273 | 1 | 0 | 0 | 0 | 0 |
| 273274 | 1 | 0 | 0 | 0 | 0 |
| 273275 | 1 | 0 | 0 | 0 | 0 |
| 273276 | 1 | 0 | 0 | 0 | 0 |
| 276293 | 1 | 0 | 0 | 0 | 0 |
| 277278 | 1 | 0 | 0 | 0 | 0 |
| 277279 | 1 | 0 | 0 | 0 | 0 |
| 277280 | 1 | 0 | 0 | 0 | 0 |
| 277325 | 1 | 0 | 0 | 0 | 0 |
| 280281 | 1 | 0 | 0 | 0 | 0 |
| 281282 | 1 | 0 | 0 | 0 | 0 |
| 281289 | 2 | 0 | 0 | 0 | 0 |
| 282283 | 1 | 0 | 0 | 0 | 0 |
| 282284 | 1 | 0 | 0 | 0 | 0 |
| 282285 | 1 | 0 | 0 | 0 | 0 |
| 285286 | 1 | 0 | 0 | 0 | 0 |
| 285287 | 1 | 0 | 0 | 0 | 0 |
| 285288 | 1 | 0 | 0 | 0 | 0 |
| 290291 | 1 | 0 | 0 | 0 | 0 |
| 290292 | 1 | 0 | 0 | 0 | 0 |
| 290300 | 1 | 0 | 0 | 0 | 0 |
| 290302 | 1 | 0 | 0 | 0 | 0 |
| 293294 | 1 | 0 | 0 | 0 | 0 |
| 293295 | 1 | 0 | 0 | 0 | 0 |
| 293296 | 1 | 0 | 0 | 0 | 0 |
| 296297 | 1 | 0 | 0 | 0 | 0 |
| 296298 | 1 | 0 | 0 | 0 | 0 |
| 296299 | 1 | 0 | 0 | 0 | 0 |
| 299300 | 1 | 0 | 0 | 0 | 0 |
| 299301 | 2 | 0 | 0 | 0 | 0 |
| 302303 | 1 | 0 | 0 | 0 | 0 |
| 302304 | 1 | 0 | 0 | 0 | 0 |
| 302305 | 1 | 0 | 0 | 0 | 0 |
| 305306 | 1 | 0 | 0 | 0 | 0 |
| 306307 | 1 | 0 | 0 | 0 | 0 |





|         |         |         |   |   |   |   |   |   |   |   |   |   |   |   |   |
|---------|---------|---------|---|---|---|---|---|---|---|---|---|---|---|---|---|
| 28.0270 | 2.8940  | 6.4010  | O | 0 | 0 | 0 | 0 | 0 | 0 | 0 | 0 | 0 | 0 | 0 | 0 |
| 29.3220 | 2.4550  | 5.9910  | C | 0 | 0 | 0 | 0 | 0 | 0 | 0 | 0 | 0 | 0 | 0 | 0 |
| 29.2630 | 1.5030  | 5.4490  | H | 0 | 0 | 0 | 0 | 0 | 0 | 0 | 0 | 0 | 0 | 0 | 0 |
| 29.9020 | 2.2540  | 6.8980  | H | 0 | 0 | 0 | 0 | 0 | 0 | 0 | 0 | 0 | 0 | 0 | 0 |
| 29.1090 | 5.3890  | -2.2710 | O | 0 | 0 | 0 | 0 | 0 | 0 | 0 | 0 | 0 | 0 | 0 | 0 |
| 28.9190 | 5.0150  | -3.1490 | H | 0 | 0 | 0 | 0 | 0 | 0 | 0 | 0 | 0 | 0 | 0 | 0 |
| 30.2310 | 4.6930  | -1.7490 | C | 0 | 0 | 0 | 0 | 0 | 0 | 0 | 0 | 0 | 0 | 0 | 0 |
| 29.9460 | 3.6490  | -1.5850 | H | 0 | 0 | 0 | 0 | 0 | 0 | 0 | 0 | 0 | 0 | 0 | 0 |
| 31.0400 | 4.7300  | -2.4860 | H | 0 | 0 | 0 | 0 | 0 | 0 | 0 | 0 | 0 | 0 | 0 | 0 |
| 30.6560 | 5.3560  | -0.4480 | C | 0 | 0 | 0 | 0 | 0 | 0 | 0 | 0 | 0 | 0 | 0 | 0 |
| 30.9020 | 6.4080  | -0.6390 | H | 0 | 0 | 0 | 0 | 0 | 0 | 0 | 0 | 0 | 0 | 0 | 0 |
| 29.8070 | 5.3690  | 0.2470  | H | 0 | 0 | 0 | 0 | 0 | 0 | 0 | 0 | 0 | 0 | 0 | 0 |
| 31.8460 | 4.6390  | 0.1840  | C | 0 | 0 | 0 | 0 | 0 | 0 | 0 | 0 | 0 | 0 | 0 | 0 |
| 31.5810 | 3.5900  | 0.3650  | H | 0 | 0 | 0 | 0 | 0 | 0 | 0 | 0 | 0 | 0 | 0 | 0 |
| 32.6950 | 4.6440  | -0.5100 | H | 0 | 0 | 0 | 0 | 0 | 0 | 0 | 0 | 0 | 0 | 0 | 0 |
| 32.2550 | 5.3020  | 1.5010  | C | 0 | 0 | 0 | 0 | 0 | 0 | 0 | 0 | 0 | 0 | 0 | 0 |
| 32.5630 | 6.3340  | 1.2980  | H | 0 | 0 | 0 | 0 | 0 | 0 | 0 | 0 | 0 | 0 | 0 | 0 |
| 31.3860 | 5.3440  | 2.1700  | H | 0 | 0 | 0 | 0 | 0 | 0 | 0 | 0 | 0 | 0 | 0 | 0 |
| 33.3890 | 4.5250  | 2.1820  | C | 0 | 0 | 0 | 0 | 0 | 0 | 0 | 0 | 0 | 0 | 0 | 0 |
| 33.0720 | 3.4770  | 2.2190  | H | 0 | 0 | 0 | 0 | 0 | 0 | 0 | 0 | 0 | 0 | 0 | 0 |
| 34.2940 | 4.5430  | 1.5640  | H | 0 | 0 | 0 | 0 | 0 | 0 | 0 | 0 | 0 | 0 | 0 | 0 |
| 33.6520 | 5.0090  | 3.5440  | N | 0 | 0 | 3 | 0 | 0 | 0 | 0 | 0 | 0 | 0 | 0 | 0 |
| 48.9300 | 9.6600  | 5.4160  | C | 0 | 0 | 0 | 0 | 0 | 0 | 0 | 0 | 0 | 0 | 0 | 0 |
| 49.1280 | 9.8860  | 4.3610  | H | 0 | 0 | 0 | 0 | 0 | 0 | 0 | 0 | 0 | 0 | 0 | 0 |
| 48.1900 | 8.8520  | 5.4140  | H | 0 | 0 | 0 | 0 | 0 | 0 | 0 | 0 | 0 | 0 | 0 | 0 |
| 50.1030 | 9.1490  | 6.0690  | O | 0 | 0 | 0 | 0 | 0 | 0 | 0 | 0 | 0 | 0 | 0 | 0 |
| 51.2750 | 9.7830  | 5.7660  | C | 0 | 0 | 0 | 0 | 0 | 0 | 0 | 0 | 0 | 0 | 0 | 0 |
| 52.4050 | 9.1460  | 6.5390  | C | 0 | 0 | 0 | 0 | 0 | 0 | 0 | 0 | 0 | 0 | 0 | 0 |
| 52.2160 | 9.2780  | 7.6100  | H | 0 | 0 | 0 | 0 | 0 | 0 | 0 | 0 | 0 | 0 | 0 | 0 |
| 52.3770 | 8.0700  | 6.3240  | H | 0 | 0 | 0 | 0 | 0 | 0 | 0 | 0 | 0 | 0 | 0 | 0 |
| 53.7880 | 9.6840  | 6.1370  | C | 0 | 0 | 0 | 0 | 0 | 0 | 0 | 0 | 0 | 0 | 0 | 0 |
| 53.7690 | 10.2480 | 5.1970  | H | 0 | 0 | 0 | 0 | 0 | 0 | 0 | 0 | 0 | 0 | 0 | 0 |
| 54.4020 | 8.7980  | 5.9410  | H | 0 | 0 | 0 | 0 | 0 | 0 | 0 | 0 | 0 | 0 | 0 | 0 |
| 51.3850 | 10.7310 | 5.0020  | O | 0 | 0 | 0 | 0 | 0 | 0 | 0 | 0 | 0 | 0 | 0 | 0 |
| 36.7740 | 9.5110  | 4.8460  | C | 0 | 0 | 0 | 0 | 0 | 0 | 0 | 0 | 0 | 0 | 0 | 0 |
| 36.0980 | 10.2540 | 4.4030  | H | 0 | 0 | 0 | 0 | 0 | 0 | 0 | 0 | 0 | 0 | 0 | 0 |
| 36.6500 | 9.6060  | 5.9310  | H | 0 | 0 | 0 | 0 | 0 | 0 | 0 | 0 | 0 | 0 | 0 | 0 |
| 34.2040 | 6.3710  | 3.6120  | C | 0 | 0 | 0 | 0 | 0 | 0 | 0 | 0 | 0 | 0 | 0 | 0 |
| 33.4890 | 7.0790  | 3.1750  | H | 0 | 0 | 0 | 0 | 0 | 0 | 0 | 0 | 0 | 0 | 0 | 0 |
| 34.2440 | 6.6700  | 4.6690  | H | 0 | 0 | 0 | 0 | 0 | 0 | 0 | 0 | 0 | 0 | 0 | 0 |
| 35.5730 | 6.5760  | 2.9690  | C | 0 | 0 | 0 | 0 | 0 | 0 | 0 | 0 | 0 | 0 | 0 | 0 |
| 36.3350 | 5.9060  | 3.3810  | H | 0 | 0 | 0 | 0 | 0 | 0 | 0 | 0 | 0 | 0 | 0 | 0 |
| 35.5390 | 6.4000  | 1.8880  | H | 0 | 0 | 0 | 0 | 0 | 0 | 0 | 0 | 0 | 0 | 0 | 0 |
| 36.0240 | 7.9950  | 3.1850  | C | 0 | 0 | 0 | 0 | 0 | 0 | 0 | 0 | 0 | 0 | 0 | 0 |
| 36.3800 | 8.1790  | 4.4870  | O | 0 | 0 | 0 | 0 | 0 | 0 | 0 | 0 | 0 | 0 | 0 | 0 |
| 36.0590 | 8.8490  | 2.3100  | O | 0 | 0 | 0 | 0 | 0 | 0 | 0 | 0 | 0 | 0 | 0 | 0 |
| 38.2250 | 9.7820  | 4.4690  | C | 0 | 0 | 0 | 0 | 0 | 0 | 0 | 0 | 0 | 0 | 0 | 0 |
| 38.8700 | 9.0290  | 4.9350  | H | 0 | 0 | 0 | 0 | 0 | 0 | 0 | 0 | 0 | 0 | 0 | 0 |
| 38.3560 | 9.7100  | 3.3830  | H | 0 | 0 | 0 | 0 | 0 | 0 | 0 | 0 | 0 | 0 | 0 | 0 |
| 38.5750 | 11.0860 | 4.9240  | O | 0 | 0 | 0 | 0 | 0 | 0 | 0 | 0 | 0 | 0 | 0 | 0 |
| 39.8500 | 11.5290 | 4.4600  | C | 0 | 0 | 0 | 0 | 0 | 0 | 0 | 0 | 0 | 0 | 0 | 0 |
| 39.9360 | 11.3710 | 3.3780  | H | 0 | 0 | 0 | 0 | 0 | 0 | 0 | 0 | 0 | 0 | 0 | 0 |
| 39.8840 | 12.6100 | 4.6310  | H | 0 | 0 | 0 | 0 | 0 | 0 | 0 | 0 | 0 | 0 | 0 | 0 |
| 40.9990 | 10.8620 | 5.2170  | C | 0 | 0 | 0 | 0 | 0 | 0 | 0 | 0 | 0 | 0 | 0 | 0 |
| 40.8350 | 10.9720 | 6.2960  | H | 0 | 0 | 0 | 0 | 0 | 0 | 0 | 0 | 0 | 0 | 0 | 0 |
| 41.0030 | 9.7850  | 5.0180  | H | 0 | 0 | 0 | 0 | 0 | 0 | 0 | 0 | 0 | 0 | 0 | 0 |
| 42.3510 | 11.4600 | 4.8230  | C | 0 | 0 | 0 | 0 | 0 | 0 | 0 | 0 | 0 | 0 | 0 | 0 |
| 42.5000 | 11.3480 | 3.7420  | H | 0 | 0 | 0 | 0 | 0 | 0 | 0 | 0 | 0 | 0 | 0 | 0 |
| 42.3530 | 12.5350 | 5.0390  | H | 0 | 0 | 0 | 0 | 0 | 0 | 0 | 0 | 0 | 0 | 0 | 0 |
| 43.5060 | 10.7870 | 5.5700  | C | 0 | 0 | 0 | 0 | 0 | 0 | 0 | 0 | 0 | 0 | 0 | 0 |
| 43.3530 | 10.8880 | 6.6510  | H | 0 | 0 | 0 | 0 | 0 | 0 | 0 | 0 | 0 | 0 | 0 | 0 |
| 43.5150 | 9.7140  | 5.3430  | H | 0 | 0 | 0 | 0 | 0 | 0 | 0 | 0 | 0 | 0 | 0 | 0 |
| 44.8510 | 11.4030 | 5.1850  | C | 0 | 0 | 0 | 0 | 0 | 0 | 0 | 0 | 0 | 0 | 0 | 0 |
| 45.0110 | 11.3180 | 4.1020  | H | 0 | 0 | 0 | 0 | 0 | 0 | 0 | 0 | 0 | 0 | 0 | 0 |
| 44.8500 | 12.4790 | 5.4030  | H | 0 | 0 | 0 | 0 | 0 | 0 | 0 | 0 | 0 | 0 | 0 | 0 |
| 46.0160 | 10.7430 | 5.9170  | C | 0 | 0 | 0 | 0 | 0 | 0 | 0 | 0 | 0 | 0 | 0 | 0 |
| 45.8860 | 10.8460 | 7.0010  | H | 0 | 0 | 0 | 0 | 0 | 0 | 0 | 0 | 0 | 0 | 0 | 0 |
| 46.0650 | 9.6790  | 5.6630  | H | 0 | 0 | 0 | 0 | 0 | 0 | 0 | 0 | 0 | 0 | 0 | 0 |
| 47.2190 | 11.3990 | 5.5190  | O | 0 | 0 | 0 | 0 | 0 | 0 | 0 | 0 | 0 | 0 | 0 | 0 |
| 48.3840 | 10.8790 | 6.1550  | C | 0 | 0 | 0 | 0 | 0 | 0 | 0 | 0 | 0 | 0 | 0 | 0 |
| 48.1930 | 10.6520 | 7.2100  | H | 0 | 0 | 0 | 0 | 0 | 0 | 0 | 0 | 0 | 0 | 0 | 0 |
| 49.1350 | 11.6760 | 6.1500  | H | 0 | 0 | 0 | 0 | 0 | 0 | 0 | 0 | 0 | 0 | 0 | 0 |
| 54.1090 | 17.2700 | 7.8690  | O | 0 | 0 | 0 | 0 | 0 | 0 | 0 | 0 | 0 | 0 | 0 | 0 |
| 53.7090 | 18.1180 | 8.1340  | H | 0 | 0 | 0 | 0 | 0 | 0 | 0 | 0 | 0 | 0 | 0 | 0 |
| 53.4030 | 16.2420 | 8.5530  | C | 0 | 0 | 0 | 0 | 0 | 0 | 0 | 0 | 0 | 0 | 0 | 0 |
| 53.4690 | 16.4350 | 9.6280  | H | 0 | 0 | 0 | 0 | 0 | 0 | 0 | 0 | 0 | 0 | 0 | 0 |
| 52.3520 | 16.2790 | 8.2480  | H | 0 | 0 | 0 | 0 | 0 | 0 | 0 | 0 | 0 | 0 | 0 | 0 |
| 54.0210 | 14.8920 | 8.2050  | C | 0 | 0 | 0 | 0 | 0 | 0 | 0 | 0 | 0 | 0 | 0 | 0 |
| 53.9570 | 14.7370 | 7.1220  | H | 0 | 0 | 0 | 0 | 0 | 0 | 0 | 0 | 0 | 0 | 0 | 0 |
| 55.0920 | 14.9150 | 8.4430  | H | 0 | 0 | 0 | 0 | 0 | 0 | 0 | 0 | 0 | 0 | 0 | 0 |
| 53.3370 | 13.7500 | 8.9580  | C | 0 | 0 | 0 | 0 | 0 | 0 | 0 | 0 | 0 | 0 | 0 | 0 |

|         |         |          |   |   |   |   |   |   |   |   |   |   |   |   |   |   |   |   |   |   |
|---------|---------|----------|---|---|---|---|---|---|---|---|---|---|---|---|---|---|---|---|---|---|
| 53.3550 | 13.9750 | 10.0320  | H | 0 | 0 | 0 | 0 | 0 | 0 | 0 | 0 | 0 | 0 | 0 | 0 | 0 | 0 | 0 | 0 | 0 |
| 52.2810 | 13.6870 | 8.6670   | H | 0 | 0 | 0 | 0 | 0 | 0 | 0 | 0 | 0 | 0 | 0 | 0 | 0 | 0 | 0 | 0 | 0 |
| 54.0200 | 12.3930 | 8.7490   | C | 0 | 0 | 0 | 0 | 0 | 0 | 0 | 0 | 0 | 0 | 0 | 0 | 0 | 0 | 0 | 0 | 0 |
| 55.0870 | 12.4960 | 8.9710   | H | 0 | 0 | 0 | 0 | 0 | 0 | 0 | 0 | 0 | 0 | 0 | 0 | 0 | 0 | 0 | 0 | 0 |
| 53.6150 | 11.6910 | 9.4910   | H | 0 | 0 | 0 | 0 | 0 | 0 | 0 | 0 | 0 | 0 | 0 | 0 | 0 | 0 | 0 | 0 | 0 |
| 53.7890 | 11.8040 | 7.3470   | C | 0 | 0 | 0 | 0 | 0 | 0 | 0 | 0 | 0 | 0 | 0 | 0 | 0 | 0 | 0 | 0 | 0 |
| 52.7040 | 11.7160 | 7.2250   | H | 0 | 0 | 0 | 0 | 0 | 0 | 0 | 0 | 0 | 0 | 0 | 0 | 0 | 0 | 0 | 0 | 0 |
| 54.1360 | 12.4860 | 6.5620   | H | 0 | 0 | 0 | 0 | 0 | 0 | 0 | 0 | 0 | 0 | 0 | 0 | 0 | 0 | 0 | 0 | 0 |
| 54.4350 | 10.4780 | 7.2100   | N | 0 | 0 | 3 | 0 | 0 | 0 | 0 | 0 | 0 | 0 | 0 | 0 | 0 | 0 | 0 | 0 | 0 |
| 60.4540 | 22.2160 | 3.8790   | C | 0 | 0 | 0 | 0 | 0 | 0 | 0 | 0 | 0 | 0 | 0 | 0 | 0 | 0 | 0 | 0 | 0 |
| 60.7850 | 22.7120 | 4.8000   | H | 0 | 0 | 0 | 0 | 0 | 0 | 0 | 0 | 0 | 0 | 0 | 0 | 0 | 0 | 0 | 0 | 0 |
| 59.6880 | 21.4960 | 4.1840   | H | 0 | 0 | 0 | 0 | 0 | 0 | 0 | 0 | 0 | 0 | 0 | 0 | 0 | 0 | 0 | 0 | 0 |
| 59.8200 | 23.1510 | 2.9890   | O | 0 | 0 | 0 | 0 | 0 | 0 | 0 | 0 | 0 | 0 | 0 | 0 | 0 | 0 | 0 | 0 | 0 |
| 60.4510 | 24.3480 | 2.8110   | C | 0 | 0 | 0 | 0 | 0 | 0 | 0 | 0 | 0 | 0 | 0 | 0 | 0 | 0 | 0 | 0 | 0 |
| 59.6590 | 25.2020 | 1.8500   | C | 0 | 0 | 0 | 0 | 0 | 0 | 0 | 0 | 0 | 0 | 0 | 0 | 0 | 0 | 0 | 0 | 0 |
| 59.0950 | 24.5640 | 1.1600   | H | 0 | 0 | 0 | 0 | 0 | 0 | 0 | 0 | 0 | 0 | 0 | 0 | 0 | 0 | 0 | 0 | 0 |
| 58.9250 | 25.7460 | 2.4580   | H | 0 | 0 | 0 | 0 | 0 | 0 | 0 | 0 | 0 | 0 | 0 | 0 | 0 | 0 | 0 | 0 | 0 |
| 60.5070 | 26.2120 | 1.0640   | C | 0 | 0 | 0 | 0 | 0 | 0 | 0 | 0 | 0 | 0 | 0 | 0 | 0 | 0 | 0 | 0 | 0 |
| 61.3490 | 26.5980 | 1.6520   | H | 0 | 0 | 0 | 0 | 0 | 0 | 0 | 0 | 0 | 0 | 0 | 0 | 0 | 0 | 0 | 0 | 0 |
| 59.8420 | 27.0680 | 0.8850   | H | 0 | 0 | 0 | 0 | 0 | 0 | 0 | 0 | 0 | 0 | 0 | 0 | 0 | 0 | 0 | 0 | 0 |
| 61.4800 | 24.6900 | 3.3740   | O | 0 | 0 | 0 | 0 | 0 | 0 | 0 | 0 | 0 | 0 | 0 | 0 | 0 | 0 | 0 | 0 | 0 |
| 59.8730 | 10.1880 | 5.5810   | C | 0 | 0 | 0 | 0 | 0 | 0 | 0 | 0 | 0 | 0 | 0 | 0 | 0 | 0 | 0 | 0 | 0 |
| 60.5270 | 9.5020  | 6.1340   | H | 0 | 0 | 0 | 0 | 0 | 0 | 0 | 0 | 0 | 0 | 0 | 0 | 0 | 0 | 0 | 0 | 0 |
| 60.0430 | 9.9730  | 4.5200   | H | 0 | 0 | 0 | 0 | 0 | 0 | 0 | 0 | 0 | 0 | 0 | 0 | 0 | 0 | 0 | 0 | 0 |
| 55.8820 | 10.6420 | 6.9320   | C | 0 | 0 | 0 | 0 | 0 | 0 | 0 | 0 | 0 | 0 | 0 | 0 | 0 | 0 | 0 | 0 | 0 |
| 56.0420 | 10.9270 | 5.8840   | H | 0 | 0 | 0 | 0 | 0 | 0 | 0 | 0 | 0 | 0 | 0 | 0 | 0 | 0 | 0 | 0 | 0 |
| 56.2960 | 11.4670 | 7.5250   | H | 0 | 0 | 0 | 0 | 0 | 0 | 0 | 0 | 0 | 0 | 0 | 0 | 0 | 0 | 0 | 0 | 0 |
| 56.6910 | 9.3930  | 7.2880   | C | 0 | 0 | 0 | 0 | 0 | 0 | 0 | 0 | 0 | 0 | 0 | 0 | 0 | 0 | 0 | 0 | 0 |
| 56.4980 | 9.1010  | 8.3280   | H | 0 | 0 | 0 | 0 | 0 | 0 | 0 | 0 | 0 | 0 | 0 | 0 | 0 | 0 | 0 | 0 | 0 |
| 56.4430 | 8.5320  | 6.6590   | H | 0 | 0 | 0 | 0 | 0 | 0 | 0 | 0 | 0 | 0 | 0 | 0 | 0 | 0 | 0 | 0 | 0 |
| 58.1700 | 9.6580  | 7.1520   | C | 0 | 0 | 0 | 0 | 0 | 0 | 0 | 0 | 0 | 0 | 0 | 0 | 0 | 0 | 0 | 0 | 0 |
| 58.4880 | 9.9200  | 5.8530   | O | 0 | 0 | 0 | 0 | 0 | 0 | 0 | 0 | 0 | 0 | 0 | 0 | 0 | 0 | 0 | 0 | 0 |
| 58.9650 | 9.6220  | 8.0810   | O | 0 | 0 | 0 | 0 | 0 | 0 | 0 | 0 | 0 | 0 | 0 | 0 | 0 | 0 | 0 | 0 | 0 |
| 60.2150 | 11.6450 | 5.8730   | C | 0 | 0 | 0 | 0 | 0 | 0 | 0 | 0 | 0 | 0 | 0 | 0 | 0 | 0 | 0 | 0 | 0 |
| 59.5210 | 12.2940 | 5.3290   | H | 0 | 0 | 0 | 0 | 0 | 0 | 0 | 0 | 0 | 0 | 0 | 0 | 0 | 0 | 0 | 0 | 0 |
| 60.1000 | 11.8530 | 6.9430   | H | 0 | 0 | 0 | 0 | 0 | 0 | 0 | 0 | 0 | 0 | 0 | 0 | 0 | 0 | 0 | 0 | 0 |
| 61.5570 | 11.8960 | 5.4630   | O | 0 | 0 | 0 | 0 | 0 | 0 | 0 | 0 | 0 | 0 | 0 | 0 | 0 | 0 | 0 | 0 | 0 |
| 62.0250 | 13.1990 | 5.8180   | C | 0 | 0 | 0 | 0 | 0 | 0 | 0 | 0 | 0 | 0 | 0 | 0 | 0 | 0 | 0 | 0 | 0 |
| 61.8170 | 13.4010 | 6.8750   | H | 0 | 0 | 0 | 0 | 0 | 0 | 0 | 0 | 0 | 0 | 0 | 0 | 0 | 0 | 0 | 0 | 0 |
| 63.1150 | 13.1800 | 5.7020   | H | 0 | 0 | 0 | 0 | 0 | 0 | 0 | 0 | 0 | 0 | 0 | 0 | 0 | 0 | 0 | 0 | 0 |
| 61.4400 | 14.2860 | 4.9150   | C | 0 | 0 | 0 | 0 | 0 | 0 | 0 | 0 | 0 | 0 | 0 | 0 | 0 | 0 | 0 | 0 | 0 |
| 61.5970 | 14.0080 | 3.8660   | H | 0 | 0 | 0 | 0 | 0 | 0 | 0 | 0 | 0 | 0 | 0 | 0 | 0 | 0 | 0 | 0 | 0 |
| 60.3550 | 14.3430 | 5.0550   | H | 0 | 0 | 0 | 0 | 0 | 0 | 0 | 0 | 0 | 0 | 0 | 0 | 0 | 0 | 0 | 0 | 0 |
| 62.0620 | 15.6540 | 5.2000   | C | 0 | 0 | 0 | 0 | 0 | 0 | 0 | 0 | 0 | 0 | 0 | 0 | 0 | 0 | 0 | 0 | 0 |
| 61.9120 | 15.9130 | 6.2560   | H | 0 | 0 | 0 | 0 | 0 | 0 | 0 | 0 | 0 | 0 | 0 | 0 | 0 | 0 | 0 | 0 | 0 |
| 63.1440 | 15.6080 | 5.0280   | H | 0 | 0 | 0 | 0 | 0 | 0 | 0 | 0 | 0 | 0 | 0 | 0 | 0 | 0 | 0 | 0 | 0 |
| 61.4470 | 16.7410 | 4.3150   | C | 0 | 0 | 0 | 0 | 0 | 0 | 0 | 0 | 0 | 0 | 0 | 0 | 0 | 0 | 0 | 0 | 0 |
| 61.5830 | 16.4740 | 3.2600   | H | 0 | 0 | 0 | 0 | 0 | 0 | 0 | 0 | 0 | 0 | 0 | 0 | 0 | 0 | 0 | 0 | 0 |
| 60.3670 | 16.7940 | 4.4980   | H | 0 | 0 | 0 | 0 | 0 | 0 | 0 | 0 | 0 | 0 | 0 | 0 | 0 | 0 | 0 | 0 | 0 |
| 62.0770 | 18.1080 | 4.5800   | C | 0 | 0 | 0 | 0 | 0 | 0 | 0 | 0 | 0 | 0 | 0 | 0 | 0 | 0 | 0 | 0 | 0 |
| 61.9590 | 18.3850 | 5.6350   | H | 0 | 0 | 0 | 0 | 0 | 0 | 0 | 0 | 0 | 0 | 0 | 0 | 0 | 0 | 0 | 0 | 0 |
| 63.1580 | 18.0690 | 4.3990   | H | 0 | 0 | 0 | 0 | 0 | 0 | 0 | 0 | 0 | 0 | 0 | 0 | 0 | 0 | 0 | 0 | 0 |
| 61.4570 | 19.1920 | 3.7030   | C | 0 | 0 | 0 | 0 | 0 | 0 | 0 | 0 | 0 | 0 | 0 | 0 | 0 | 0 | 0 | 0 | 0 |
| 61.5830 | 18.9320 | 2.6450   | H | 0 | 0 | 0 | 0 | 0 | 0 | 0 | 0 | 0 | 0 | 0 | 0 | 0 | 0 | 0 | 0 | 0 |
| 60.3880 | 19.2880 | 3.9210   | H | 0 | 0 | 0 | 0 | 0 | 0 | 0 | 0 | 0 | 0 | 0 | 0 | 0 | 0 | 0 | 0 | 0 |
| 62.1220 | 20.4290 | 3.9670   | O | 0 | 0 | 0 | 0 | 0 | 0 | 0 | 0 | 0 | 0 | 0 | 0 | 0 | 0 | 0 | 0 | 0 |
| 61.6110 | 21.5040 | 3.1830   | C | 0 | 0 | 0 | 0 | 0 | 0 | 0 | 0 | 0 | 0 | 0 | 0 | 0 | 0 | 0 | 0 | 0 |
| 61.3180 | 21.1620 | 2.1840   | H | 0 | 0 | 0 | 0 | 0 | 0 | 0 | 0 | 0 | 0 | 0 | 0 | 0 | 0 | 0 | 0 | 0 |
| 62.4330 | 22.2110 | 3.0320   | H | 0 | 0 | 0 | 0 | 0 | 0 | 0 | 0 | 0 | 0 | 0 | 0 | 0 | 0 | 0 | 0 | 0 |
| 62.7870 | 18.6060 | -0.9930  | O | 0 | 0 | 0 | 0 | 0 | 0 | 0 | 0 | 0 | 0 | 0 | 0 | 0 | 0 | 0 | 0 | 0 |
| 63.4760 | 17.9450 | -0.8030  | H | 0 | 0 | 0 | 0 | 0 | 0 | 0 | 0 | 0 | 0 | 0 | 0 | 0 | 0 | 0 | 0 | 0 |
| 63.3180 | 19.8790 | -0.6560  | C | 0 | 0 | 0 | 0 | 0 | 0 | 0 | 0 | 0 | 0 | 0 | 0 | 0 | 0 | 0 | 0 | 0 |
| 63.6500 | 19.8510 | 0.3870   | H | 0 | 0 | 0 | 0 | 0 | 0 | 0 | 0 | 0 | 0 | 0 | 0 | 0 | 0 | 0 | 0 | 0 |
| 64.1790 | 20.0820 | -1.3000  | H | 0 | 0 | 0 | 0 | 0 | 0 | 0 | 0 | 0 | 0 | 0 | 0 | 0 | 0 | 0 | 0 | 0 |
| 62.2310 | 20.9260 | -0.8500  | C | 0 | 0 | 0 | 0 | 0 | 0 | 0 | 0 | 0 | 0 | 0 | 0 | 0 | 0 | 0 | 0 | 0 |
| 61.8970 | 20.9170 | -1.8950  | H | 0 | 0 | 0 | 0 | 0 | 0 | 0 | 0 | 0 | 0 | 0 | 0 | 0 | 0 | 0 | 0 | 0 |
| 61.3520 | 20.6470 | -0.2540  | H | 0 | 0 | 0 | 0 | 0 | 0 | 0 | 0 | 0 | 0 | 0 | 0 | 0 | 0 | 0 | 0 | 0 |
| 62.7160 | 22.3190 | -0.4610  | C | 0 | 0 | 0 | 0 | 0 | 0 | 0 | 0 | 0 | 0 | 0 | 0 | 0 | 0 | 0 | 0 | 0 |
| 63.1020 | 22.3030 | 0.5650   | H | 0 | 0 | 0 | 0 | 0 | 0 | 0 | 0 | 0 | 0 | 0 | 0 | 0 | 0 | 0 | 0 | 0 |
| 63.5490 | 22.6130 | -1.1120  | H | 0 | 0 | 0 | 0 | 0 | 0 | 0 | 0 | 0 | 0 | 0 | 0 | 0 | 0 | 0 | 0 | 0 |
| 61.5890 | 23.3490 | -0.5680  | C | 0 | 0 | 0 | 0 | 0 | 0 | 0 | 0 | 0 | 0 | 0 | 0 | 0 | 0 | 0 | 0 | 0 |
| 61.2360 | 23.3930 | -1.6060  | H | 0 | 0 | 0 | 0 | 0 | 0 | 0 | 0 | 0 | 0 | 0 | 0 | 0 | 0 | 0 | 0 | 0 |
| 60.7420 | 23.0240 | 0.0470   | H | 0 | 0 | 0 | 0 | 0 | 0 | 0 | 0 | 0 | 0 | 0 | 0 | 0 | 0 | 0 | 0 | 0 |
| 62.0640 | 24.7330 | -0.1170  | C | 0 | 0 | 0 | 0 | 0 | 0 | 0 | 0 | 0 | 0 | 0 | 0 | 0 | 0 | 0 | 0 | 0 |
| 62.4440 | 24.6800 | 0.9090   | H | 0 | 0 | 0 | 0 | 0 | 0 | 0 | 0 | 0 | 0 | 0 | 0 | 0 | 0 | 0 | 0 | 0 |
| 62.9370 | 25.0210 | -0.7170  | H | 0 | 0 | 0 | 0 | 0 | 0 | 0 | 0 | 0 | 0 | 0 | 0 | 0 | 0 | 0 | 0 | 0 |
| 60.9610 | 25.7030 | -0.2510  | N | 0 | 0 | 3 | 0 | 0 | 0 | 0 | 0 | 0 | 0 | 0 | 0 | 0 | 0 | 0 | 0 | 0 |
| 50.6500 | 31.6320 | -9.4490  | C | 0 | 0 | 0 | 0 | 0 | 0 | 0 | 0 | 0 | 0 | 0 | 0 | 0 | 0 | 0 | 0 | 0 |
| 50.3650 | 32.2240 | -8.5700  | H | 0 | 0 | 0 | 0 | 0 | 0 | 0 | 0 | 0 | 0 | 0 | 0 | 0 | 0 | 0 | 0 | 0 |
| 51.0860 | 30.7080 | -9.0560  | H | 0 | 0 | 0 | 0 | 0 | 0 | 0 | 0 | 0 | 0 | 0 | 0 | 0 | 0 | 0 | 0 | 0 |
| 49.4990 | 31.2520 | -10.2210 | O | 0 | 0 | 0 | 0 | 0 | 0 | 0 | 0 | 0 | 0 | 0 | 0 | 0 | 0 | 0 | 0 | 0 |

|         |         |          |   |   |   |   |   |   |   |   |   |   |   |   |   |   |   |   |
|---------|---------|----------|---|---|---|---|---|---|---|---|---|---|---|---|---|---|---|---|
| 48.5280 | 32.2000 | -10.3530 | C | 0 | 0 | 0 | 0 | 0 | 0 | 0 | 0 | 0 | 0 | 0 | 0 | 0 | 0 | 0 |
| 47.3890 | 31.6340 | -11.1680 | C | 0 | 0 | 0 | 0 | 0 | 0 | 0 | 0 | 0 | 0 | 0 | 0 | 0 | 0 | 0 |
| 47.7780 | 31.3420 | -12.1500 | H | 0 | 0 | 0 | 0 | 0 | 0 | 0 | 0 | 0 | 0 | 0 | 0 | 0 | 0 | 0 |
| 47.0040 | 30.7460 | -10.6560 | H | 0 | 0 | 0 | 0 | 0 | 0 | 0 | 0 | 0 | 0 | 0 | 0 | 0 | 0 | 0 |
| 46.2640 | 32.6370 | -11.3500 | C | 0 | 0 | 0 | 0 | 0 | 0 | 0 | 0 | 0 | 0 | 0 | 0 | 0 | 0 | 0 |
| 45.8520 | 32.9460 | -10.3840 | H | 0 | 0 | 0 | 0 | 0 | 0 | 0 | 0 | 0 | 0 | 0 | 0 | 0 | 0 | 0 |
| 45.4550 | 32.1990 | -11.9430 | H | 0 | 0 | 0 | 0 | 0 | 0 | 0 | 0 | 0 | 0 | 0 | 0 | 0 | 0 | 0 |
| 46.6170 | 33.5360 | -11.8660 | H | 0 | 0 | 0 | 0 | 0 | 0 | 0 | 0 | 0 | 0 | 0 | 0 | 0 | 0 | 0 |
| 48.5750 | 33.3300 | -9.8900  | O | 0 | 0 | 0 | 0 | 0 | 0 | 0 | 0 | 0 | 0 | 0 | 0 | 0 | 0 | 0 |
| 61.6560 | 28.2910 | -5.7550  | C | 0 | 0 | 0 | 0 | 0 | 0 | 0 | 0 | 0 | 0 | 0 | 0 | 0 | 0 | 0 |
| 62.5770 | 28.8530 | -5.5550  | H | 0 | 0 | 0 | 0 | 0 | 0 | 0 | 0 | 0 | 0 | 0 | 0 | 0 | 0 | 0 |
| 61.7980 | 27.8200 | -6.7340  | H | 0 | 0 | 0 | 0 | 0 | 0 | 0 | 0 | 0 | 0 | 0 | 0 | 0 | 0 | 0 |
| 61.3330 | 26.8240 | -1.1400  | C | 0 | 0 | 0 | 0 | 0 | 0 | 0 | 0 | 0 | 0 | 0 | 0 | 0 | 0 | 0 |
| 60.5570 | 27.5990 | -1.0950  | H | 0 | 0 | 0 | 0 | 0 | 0 | 0 | 0 | 0 | 0 | 0 | 0 | 0 | 0 | 0 |
| 62.2630 | 27.2980 | -0.7990  | H | 0 | 0 | 0 | 0 | 0 | 0 | 0 | 0 | 0 | 0 | 0 | 0 | 0 | 0 | 0 |
| 61.4460 | 26.3860 | -2.6060  | C | 0 | 0 | 0 | 0 | 0 | 0 | 0 | 0 | 0 | 0 | 0 | 0 | 0 | 0 | 0 |
| 62.2540 | 25.6630 | -2.7540  | H | 0 | 0 | 0 | 0 | 0 | 0 | 0 | 0 | 0 | 0 | 0 | 0 | 0 | 0 | 0 |
| 60.4990 | 25.9300 | -2.9200  | H | 0 | 0 | 0 | 0 | 0 | 0 | 0 | 0 | 0 | 0 | 0 | 0 | 0 | 0 | 0 |
| 61.7240 | 27.5700 | -3.4970  | C | 0 | 0 | 0 | 0 | 0 | 0 | 0 | 0 | 0 | 0 | 0 | 0 | 0 | 0 | 0 |
| 61.4690 | 27.2400 | -4.7950  | O | 0 | 0 | 0 | 0 | 0 | 0 | 0 | 0 | 0 | 0 | 0 | 0 | 0 | 0 | 0 |
| 62.1240 | 28.6590 | -3.1100  | O | 0 | 0 | 0 | 0 | 0 | 0 | 0 | 0 | 0 | 0 | 0 | 0 | 0 | 0 | 0 |
| 60.4380 | 29.2060 | -5.7940  | C | 0 | 0 | 0 | 0 | 0 | 0 | 0 | 0 | 0 | 0 | 0 | 0 | 0 | 0 | 0 |
| 59.5450 | 28.6120 | -6.0140  | H | 0 | 0 | 0 | 0 | 0 | 0 | 0 | 0 | 0 | 0 | 0 | 0 | 0 | 0 | 0 |
| 60.2890 | 29.6830 | -4.8190  | H | 0 | 0 | 0 | 0 | 0 | 0 | 0 | 0 | 0 | 0 | 0 | 0 | 0 | 0 | 0 |
| 60.6390 | 30.1980 | -6.7960  | O | 0 | 0 | 0 | 0 | 0 | 0 | 0 | 0 | 0 | 0 | 0 | 0 | 0 | 0 | 0 |
| 59.5880 | 31.1630 | -6.8540  | C | 0 | 0 | 0 | 0 | 0 | 0 | 0 | 0 | 0 | 0 | 0 | 0 | 0 | 0 | 0 |
| 59.3170 | 31.4970 | -5.8450  | H | 0 | 0 | 0 | 0 | 0 | 0 | 0 | 0 | 0 | 0 | 0 | 0 | 0 | 0 | 0 |
| 59.9910 | 32.0320 | -7.3850  | H | 0 | 0 | 0 | 0 | 0 | 0 | 0 | 0 | 0 | 0 | 0 | 0 | 0 | 0 | 0 |
| 58.3740 | 30.6280 | -7.6140  | C | 0 | 0 | 0 | 0 | 0 | 0 | 0 | 0 | 0 | 0 | 0 | 0 | 0 | 0 | 0 |
| 58.6970 | 30.2570 | -8.5950  | H | 0 | 0 | 0 | 0 | 0 | 0 | 0 | 0 | 0 | 0 | 0 | 0 | 0 | 0 | 0 |
| 57.9530 | 29.7640 | -7.0880  | H | 0 | 0 | 0 | 0 | 0 | 0 | 0 | 0 | 0 | 0 | 0 | 0 | 0 | 0 | 0 |
| 57.2940 | 31.6990 | -7.7820  | C | 0 | 0 | 0 | 0 | 0 | 0 | 0 | 0 | 0 | 0 | 0 | 0 | 0 | 0 | 0 |
| 56.9790 | 32.0580 | -6.7950  | H | 0 | 0 | 0 | 0 | 0 | 0 | 0 | 0 | 0 | 0 | 0 | 0 | 0 | 0 | 0 |
| 57.7100 | 32.5580 | -8.3210  | H | 0 | 0 | 0 | 0 | 0 | 0 | 0 | 0 | 0 | 0 | 0 | 0 | 0 | 0 | 0 |
| 56.0800 | 31.1570 | -8.5420  | C | 0 | 0 | 0 | 0 | 0 | 0 | 0 | 0 | 0 | 0 | 0 | 0 | 0 | 0 | 0 |
| 56.3960 | 30.8020 | -9.5300  | H | 0 | 0 | 0 | 0 | 0 | 0 | 0 | 0 | 0 | 0 | 0 | 0 | 0 | 0 | 0 |
| 55.6670 | 30.2940 | -8.0060  | H | 0 | 0 | 0 | 0 | 0 | 0 | 0 | 0 | 0 | 0 | 0 | 0 | 0 | 0 | 0 |
| 54.9970 | 32.2230 | -8.7040  | C | 0 | 0 | 0 | 0 | 0 | 0 | 0 | 0 | 0 | 0 | 0 | 0 | 0 | 0 | 0 |
| 54.6740 | 32.5870 | -7.7200  | H | 0 | 0 | 0 | 0 | 0 | 0 | 0 | 0 | 0 | 0 | 0 | 0 | 0 | 0 | 0 |
| 55.4010 | 33.0980 | -9.2290  | H | 0 | 0 | 0 | 0 | 0 | 0 | 0 | 0 | 0 | 0 | 0 | 0 | 0 | 0 | 0 |
| 53.7870 | 31.6920 | -9.4670  | C | 0 | 0 | 0 | 0 | 0 | 0 | 0 | 0 | 0 | 0 | 0 | 0 | 0 | 0 | 0 |
| 54.0890 | 31.3680 | -10.4700 | H | 0 | 0 | 0 | 0 | 0 | 0 | 0 | 0 | 0 | 0 | 0 | 0 | 0 | 0 | 0 |
| 53.3510 | 30.8410 | -8.9330  | H | 0 | 0 | 0 | 0 | 0 | 0 | 0 | 0 | 0 | 0 | 0 | 0 | 0 | 0 | 0 |
| 52.8270 | 32.7440 | -9.5750  | O | 0 | 0 | 0 | 0 | 0 | 0 | 0 | 0 | 0 | 0 | 0 | 0 | 0 | 0 | 0 |
| 51.6640 | 32.3750 | -10.3140 | C | 0 | 0 | 0 | 0 | 0 | 0 | 0 | 0 | 0 | 0 | 0 | 0 | 0 | 0 | 0 |
| 51.9310 | 31.7900 | -11.2030 | H | 0 | 0 | 0 | 0 | 0 | 0 | 0 | 0 | 0 | 0 | 0 | 0 | 0 | 0 | 0 |
| 51.2140 | 33.3010 | -10.6880 | H | 0 | 0 | 0 | 0 | 0 | 0 | 0 | 0 | 0 | 0 | 0 | 0 | 0 | 0 | 0 |
| 1       | 2       | 1        | 0 | 0 | 0 | 0 | 0 | 0 | 0 | 0 | 0 | 0 | 0 | 0 | 0 | 0 | 0 | 0 |
| 1       | 3       | 1        | 0 | 0 | 0 | 0 | 0 | 0 | 0 | 0 | 0 | 0 | 0 | 0 | 0 | 0 | 0 | 0 |
| 3       | 4       | 1        | 0 | 0 | 0 | 0 | 0 | 0 | 0 | 0 | 0 | 0 | 0 | 0 | 0 | 0 | 0 | 0 |
| 3       | 5       | 1        | 0 | 0 | 0 | 0 | 0 | 0 | 0 | 0 | 0 | 0 | 0 | 0 | 0 | 0 | 0 | 0 |
| 3       | 6       | 1        | 0 | 0 | 0 | 0 | 0 | 0 | 0 | 0 | 0 | 0 | 0 | 0 | 0 | 0 | 0 | 0 |
| 6       | 7       | 1        | 0 | 0 | 0 | 0 | 0 | 0 | 0 | 0 | 0 | 0 | 0 | 0 | 0 | 0 | 0 | 0 |
| 6       | 8       | 1        | 0 | 0 | 0 | 0 | 0 | 0 | 0 | 0 | 0 | 0 | 0 | 0 | 0 | 0 | 0 | 0 |
| 6       | 9       | 1        | 0 | 0 | 0 | 0 | 0 | 0 | 0 | 0 | 0 | 0 | 0 | 0 | 0 | 0 | 0 | 0 |
| 9       | 10      | 1        | 0 | 0 | 0 | 0 | 0 | 0 | 0 | 0 | 0 | 0 | 0 | 0 | 0 | 0 | 0 | 0 |
| 9       | 11      | 1        | 0 | 0 | 0 | 0 | 0 | 0 | 0 | 0 | 0 | 0 | 0 | 0 | 0 | 0 | 0 | 0 |
| 9       | 12      | 1        | 0 | 0 | 0 | 0 | 0 | 0 | 0 | 0 | 0 | 0 | 0 | 0 | 0 | 0 | 0 | 0 |
| 12      | 13      | 1        | 0 | 0 | 0 | 0 | 0 | 0 | 0 | 0 | 0 | 0 | 0 | 0 | 0 | 0 | 0 | 0 |
| 12      | 14      | 1        | 0 | 0 | 0 | 0 | 0 | 0 | 0 | 0 | 0 | 0 | 0 | 0 | 0 | 0 | 0 | 0 |
| 12      | 15      | 1        | 0 | 0 | 0 | 0 | 0 | 0 | 0 | 0 | 0 | 0 | 0 | 0 | 0 | 0 | 0 | 0 |
| 15      | 16      | 1        | 0 | 0 | 0 | 0 | 0 | 0 | 0 | 0 | 0 | 0 | 0 | 0 | 0 | 0 | 0 | 0 |
| 15      | 17      | 1        | 0 | 0 | 0 | 0 | 0 | 0 | 0 | 0 | 0 | 0 | 0 | 0 | 0 | 0 | 0 | 0 |
| 15      | 18      | 1        | 0 | 0 | 0 | 0 | 0 | 0 | 0 | 0 | 0 | 0 | 0 | 0 | 0 | 0 | 0 | 0 |
| 18      | 19      | 1        | 0 | 0 | 0 | 0 | 0 | 0 | 0 | 0 | 0 | 0 | 0 | 0 | 0 | 0 | 0 | 0 |
| 18      | 35      | 1        | 0 | 0 | 0 | 0 | 0 | 0 | 0 | 0 | 0 | 0 | 0 | 0 | 0 | 0 | 0 | 0 |
| 20      | 21      | 1        | 0 | 0 | 0 | 0 | 0 | 0 | 0 | 0 | 0 | 0 | 0 | 0 | 0 | 0 | 0 | 0 |
| 20      | 22      | 1        | 0 | 0 | 0 | 0 | 0 | 0 | 0 | 0 | 0 | 0 | 0 | 0 | 0 | 0 | 0 | 0 |
| 20      | 23      | 1        | 0 | 0 | 0 | 0 | 0 | 0 | 0 | 0 | 0 | 0 | 0 | 0 | 0 | 0 | 0 | 0 |
| 20      | 67      | 1        | 0 | 0 | 0 | 0 | 0 | 0 | 0 | 0 | 0 | 0 | 0 | 0 | 0 | 0 | 0 | 0 |
| 23      | 24      | 1        | 0 | 0 | 0 | 0 | 0 | 0 | 0 | 0 | 0 | 0 | 0 | 0 | 0 | 0 | 0 | 0 |
| 24      | 25      | 1        | 0 | 0 | 0 | 0 | 0 | 0 | 0 | 0 | 0 | 0 | 0 | 0 | 0 | 0 | 0 | 0 |
| 24      | 31      | 2        | 0 | 0 | 0 | 0 | 0 | 0 | 0 | 0 | 0 | 0 | 0 | 0 | 0 | 0 | 0 | 0 |
| 25      | 26      | 1        | 0 | 0 | 0 | 0 | 0 | 0 | 0 | 0 | 0 | 0 | 0 | 0 | 0 | 0 | 0 | 0 |
| 25      | 27      | 1        | 0 | 0 | 0 | 0 | 0 | 0 | 0 | 0 | 0 | 0 | 0 | 0 | 0 | 0 | 0 | 0 |
| 25      | 28      | 1        | 0 | 0 | 0 | 0 | 0 | 0 | 0 | 0 | 0 | 0 | 0 | 0 | 0 | 0 | 0 | 0 |
| 28      | 29      | 1        | 0 | 0 | 0 | 0 | 0 | 0 | 0 | 0 | 0 | 0 | 0 | 0 | 0 | 0 | 0 | 0 |
| 28      | 30      | 1        | 0 | 0 | 0 | 0 | 0 | 0 | 0 | 0 | 0 | 0 | 0 | 0 | 0 | 0 | 0 | 0 |
| 28      | 87      | 1        | 0 | 0 | 0 | 0 | 0 | 0 | 0 | 0 | 0 | 0 | 0 | 0 | 0 | 0 | 0 | 0 |
| 32      | 33      | 1        | 0 | 0 | 0 | 0 | 0 | 0 | 0 | 0 | 0 | 0 | 0 | 0 | 0 | 0 | 0 | 0 |
| 32      | 34      | 1        | 0 | 0 | 0 | 0 | 0 | 0 | 0 | 0 | 0 | 0 | 0 | 0 | 0 | 0 | 0 | 0 |

|     |     |   |   |   |   |   |
|-----|-----|---|---|---|---|---|
| 32  | 42  | 1 | 0 | 0 | 0 | 0 |
| 32  | 44  | 1 | 0 | 0 | 0 | 0 |
| 35  | 36  | 1 | 0 | 0 | 0 | 0 |
| 35  | 37  | 1 | 0 | 0 | 0 | 0 |
| 35  | 38  | 1 | 0 | 0 | 0 | 0 |
| 38  | 39  | 1 | 0 | 0 | 0 | 0 |
| 38  | 40  | 1 | 0 | 0 | 0 | 0 |
| 38  | 41  | 1 | 0 | 0 | 0 | 0 |
| 41  | 42  | 1 | 0 | 0 | 0 | 0 |
| 41  | 43  | 2 | 0 | 0 | 0 | 0 |
| 44  | 45  | 1 | 0 | 0 | 0 | 0 |
| 44  | 46  | 1 | 0 | 0 | 0 | 0 |
| 44  | 47  | 1 | 0 | 0 | 0 | 0 |
| 47  | 48  | 1 | 0 | 0 | 0 | 0 |
| 48  | 49  | 1 | 0 | 0 | 0 | 0 |
| 48  | 50  | 1 | 0 | 0 | 0 | 0 |
| 48  | 51  | 1 | 0 | 0 | 0 | 0 |
| 51  | 52  | 1 | 0 | 0 | 0 | 0 |
| 51  | 53  | 1 | 0 | 0 | 0 | 0 |
| 51  | 54  | 1 | 0 | 0 | 0 | 0 |
| 54  | 55  | 1 | 0 | 0 | 0 | 0 |
| 54  | 56  | 1 | 0 | 0 | 0 | 0 |
| 54  | 57  | 1 | 0 | 0 | 0 | 0 |
| 57  | 58  | 1 | 0 | 0 | 0 | 0 |
| 57  | 59  | 1 | 0 | 0 | 0 | 0 |
| 57  | 60  | 1 | 0 | 0 | 0 | 0 |
| 60  | 61  | 1 | 0 | 0 | 0 | 0 |
| 60  | 62  | 1 | 0 | 0 | 0 | 0 |
| 60  | 63  | 1 | 0 | 0 | 0 | 0 |
| 63  | 64  | 1 | 0 | 0 | 0 | 0 |
| 63  | 65  | 1 | 0 | 0 | 0 | 0 |
| 63  | 66  | 1 | 0 | 0 | 0 | 0 |
| 66  | 67  | 1 | 0 | 0 | 0 | 0 |
| 67  | 68  | 1 | 0 | 0 | 0 | 0 |
| 67  | 69  | 1 | 0 | 0 | 0 | 0 |
| 70  | 71  | 1 | 0 | 0 | 0 | 0 |
| 70  | 72  | 1 | 0 | 0 | 0 | 0 |
| 72  | 73  | 1 | 0 | 0 | 0 | 0 |
| 72  | 74  | 1 | 0 | 0 | 0 | 0 |
| 72  | 75  | 1 | 0 | 0 | 0 | 0 |
| 75  | 76  | 1 | 0 | 0 | 0 | 0 |
| 75  | 77  | 1 | 0 | 0 | 0 | 0 |
| 75  | 78  | 1 | 0 | 0 | 0 | 0 |
| 78  | 79  | 1 | 0 | 0 | 0 | 0 |
| 78  | 80  | 1 | 0 | 0 | 0 | 0 |
| 78  | 81  | 1 | 0 | 0 | 0 | 0 |
| 81  | 82  | 1 | 0 | 0 | 0 | 0 |
| 81  | 83  | 1 | 0 | 0 | 0 | 0 |
| 81  | 84  | 1 | 0 | 0 | 0 | 0 |
| 84  | 85  | 1 | 0 | 0 | 0 | 0 |
| 84  | 86  | 1 | 0 | 0 | 0 | 0 |
| 84  | 87  | 1 | 0 | 0 | 0 | 0 |
| 87  | 103 | 1 | 0 | 0 | 0 | 0 |
| 88  | 89  | 1 | 0 | 0 | 0 | 0 |
| 88  | 90  | 1 | 0 | 0 | 0 | 0 |
| 88  | 91  | 1 | 0 | 0 | 0 | 0 |
| 88  | 135 | 1 | 0 | 0 | 0 | 0 |
| 91  | 92  | 1 | 0 | 0 | 0 | 0 |
| 92  | 93  | 1 | 0 | 0 | 0 | 0 |
| 92  | 99  | 2 | 0 | 0 | 0 | 0 |
| 93  | 94  | 1 | 0 | 0 | 0 | 0 |
| 93  | 95  | 1 | 0 | 0 | 0 | 0 |
| 93  | 96  | 1 | 0 | 0 | 0 | 0 |
| 96  | 97  | 1 | 0 | 0 | 0 | 0 |
| 96  | 98  | 1 | 0 | 0 | 0 | 0 |
| 96  | 155 | 1 | 0 | 0 | 0 | 0 |
| 100 | 101 | 1 | 0 | 0 | 0 | 0 |
| 100 | 102 | 1 | 0 | 0 | 0 | 0 |
| 100 | 110 | 1 | 0 | 0 | 0 | 0 |
| 100 | 112 | 1 | 0 | 0 | 0 | 0 |
| 103 | 104 | 1 | 0 | 0 | 0 | 0 |
| 103 | 105 | 1 | 0 | 0 | 0 | 0 |
| 103 | 106 | 1 | 0 | 0 | 0 | 0 |
| 106 | 107 | 1 | 0 | 0 | 0 | 0 |
| 106 | 108 | 1 | 0 | 0 | 0 | 0 |
| 106 | 109 | 1 | 0 | 0 | 0 | 0 |
| 109 | 110 | 1 | 0 | 0 | 0 | 0 |
| 109 | 111 | 2 | 0 | 0 | 0 | 0 |
| 112 | 113 | 1 | 0 | 0 | 0 | 0 |
| 112 | 114 | 1 | 0 | 0 | 0 | 0 |
| 112 | 115 | 1 | 0 | 0 | 0 | 0 |



|        |   |   |   |   |   |
|--------|---|---|---|---|---|
| 115116 | 1 | 0 | 0 | 0 | 0 |
| 116117 | 1 | 0 | 0 | 0 | 0 |
| 116118 | 1 | 0 | 0 | 0 | 0 |
| 116119 | 1 | 0 | 0 | 0 | 0 |
| 119120 | 1 | 0 | 0 | 0 | 0 |
| 119121 | 1 | 0 | 0 | 0 | 0 |
| 119122 | 1 | 0 | 0 | 0 | 0 |
| 122123 | 1 | 0 | 0 | 0 | 0 |
| 122124 | 1 | 0 | 0 | 0 | 0 |
| 122125 | 1 | 0 | 0 | 0 | 0 |
| 125126 | 1 | 0 | 0 | 0 | 0 |
| 125127 | 1 | 0 | 0 | 0 | 0 |
| 125128 | 1 | 0 | 0 | 0 | 0 |
| 128129 | 1 | 0 | 0 | 0 | 0 |
| 128130 | 1 | 0 | 0 | 0 | 0 |
| 128131 | 1 | 0 | 0 | 0 | 0 |
| 131132 | 1 | 0 | 0 | 0 | 0 |
| 131133 | 1 | 0 | 0 | 0 | 0 |
| 131134 | 1 | 0 | 0 | 0 | 0 |
| 134135 | 1 | 0 | 0 | 0 | 0 |
| 135136 | 1 | 0 | 0 | 0 | 0 |
| 135137 | 1 | 0 | 0 | 0 | 0 |
| 138139 | 1 | 0 | 0 | 0 | 0 |
| 138140 | 1 | 0 | 0 | 0 | 0 |
| 140141 | 1 | 0 | 0 | 0 | 0 |
| 140142 | 1 | 0 | 0 | 0 | 0 |
| 140143 | 1 | 0 | 0 | 0 | 0 |
| 143144 | 1 | 0 | 0 | 0 | 0 |
| 143145 | 1 | 0 | 0 | 0 | 0 |
| 143146 | 1 | 0 | 0 | 0 | 0 |
| 146147 | 1 | 0 | 0 | 0 | 0 |
| 146148 | 1 | 0 | 0 | 0 | 0 |
| 146149 | 1 | 0 | 0 | 0 | 0 |
| 149150 | 1 | 0 | 0 | 0 | 0 |
| 149151 | 1 | 0 | 0 | 0 | 0 |
| 149152 | 1 | 0 | 0 | 0 | 0 |
| 152153 | 1 | 0 | 0 | 0 | 0 |
| 152154 | 1 | 0 | 0 | 0 | 0 |
| 152155 | 1 | 0 | 0 | 0 | 0 |
| 155171 | 1 | 0 | 0 | 0 | 0 |
| 156157 | 1 | 0 | 0 | 0 | 0 |
| 156158 | 1 | 0 | 0 | 0 | 0 |
| 156159 | 1 | 0 | 0 | 0 | 0 |
| 156203 | 1 | 0 | 0 | 0 | 0 |
| 159160 | 1 | 0 | 0 | 0 | 0 |
| 160161 | 1 | 0 | 0 | 0 | 0 |
| 160167 | 2 | 0 | 0 | 0 | 0 |
| 161162 | 1 | 0 | 0 | 0 | 0 |
| 161163 | 1 | 0 | 0 | 0 | 0 |
| 161164 | 1 | 0 | 0 | 0 | 0 |
| 164165 | 1 | 0 | 0 | 0 | 0 |
| 164166 | 1 | 0 | 0 | 0 | 0 |
| 164223 | 1 | 0 | 0 | 0 | 0 |
| 168169 | 1 | 0 | 0 | 0 | 0 |
| 168170 | 1 | 0 | 0 | 0 | 0 |
| 168178 | 1 | 0 | 0 | 0 | 0 |
| 168180 | 1 | 0 | 0 | 0 | 0 |
| 171172 | 1 | 0 | 0 | 0 | 0 |
| 171173 | 1 | 0 | 0 | 0 | 0 |
| 171174 | 1 | 0 | 0 | 0 | 0 |
| 174175 | 1 | 0 | 0 | 0 | 0 |
| 174176 | 1 | 0 | 0 | 0 | 0 |
| 174177 | 1 | 0 | 0 | 0 | 0 |
| 177178 | 1 | 0 | 0 | 0 | 0 |
| 177179 | 2 | 0 | 0 | 0 | 0 |
| 180181 | 1 | 0 | 0 | 0 | 0 |
| 180182 | 1 | 0 | 0 | 0 | 0 |
| 180183 | 1 | 0 | 0 | 0 | 0 |
| 183184 | 1 | 0 | 0 | 0 | 0 |
| 184185 | 1 | 0 | 0 | 0 | 0 |
| 184186 | 1 | 0 | 0 | 0 | 0 |
| 184187 | 1 | 0 | 0 | 0 | 0 |
| 187188 | 1 | 0 | 0 | 0 | 0 |
| 187189 | 1 | 0 | 0 | 0 | 0 |
| 187190 | 1 | 0 | 0 | 0 | 0 |
| 190191 | 1 | 0 | 0 | 0 | 0 |
| 190192 | 1 | 0 | 0 | 0 | 0 |
| 190193 | 1 | 0 | 0 | 0 | 0 |
| 193194 | 1 | 0 | 0 | 0 | 0 |
| 193195 | 1 | 0 | 0 | 0 | 0 |
| 193196 | 1 | 0 | 0 | 0 | 0 |

|        |   |   |   |   |   |
|--------|---|---|---|---|---|
| 196197 | 1 | 0 | 0 | 0 | 0 |
| 196198 | 1 | 0 | 0 | 0 | 0 |
| 196199 | 1 | 0 | 0 | 0 | 0 |
| 199200 | 1 | 0 | 0 | 0 | 0 |
| 199201 | 1 | 0 | 0 | 0 | 0 |
| 199202 | 1 | 0 | 0 | 0 | 0 |
| 202203 | 1 | 0 | 0 | 0 | 0 |
| 203204 | 1 | 0 | 0 | 0 | 0 |
| 203205 | 1 | 0 | 0 | 0 | 0 |
| 206207 | 1 | 0 | 0 | 0 | 0 |
| 206208 | 1 | 0 | 0 | 0 | 0 |
| 208209 | 1 | 0 | 0 | 0 | 0 |
| 208210 | 1 | 0 | 0 | 0 | 0 |
| 208211 | 1 | 0 | 0 | 0 | 0 |
| 211212 | 1 | 0 | 0 | 0 | 0 |
| 211213 | 1 | 0 | 0 | 0 | 0 |
| 211214 | 1 | 0 | 0 | 0 | 0 |
| 214215 | 1 | 0 | 0 | 0 | 0 |
| 214216 | 1 | 0 | 0 | 0 | 0 |
| 214217 | 1 | 0 | 0 | 0 | 0 |
| 217218 | 1 | 0 | 0 | 0 | 0 |
| 217219 | 1 | 0 | 0 | 0 | 0 |
| 217220 | 1 | 0 | 0 | 0 | 0 |
| 220221 | 1 | 0 | 0 | 0 | 0 |
| 220222 | 1 | 0 | 0 | 0 | 0 |
| 220223 | 1 | 0 | 0 | 0 | 0 |
| 223239 | 1 | 0 | 0 | 0 | 0 |
| 224225 | 1 | 0 | 0 | 0 | 0 |
| 224226 | 1 | 0 | 0 | 0 | 0 |
| 224227 | 1 | 0 | 0 | 0 | 0 |
| 224271 | 1 | 0 | 0 | 0 | 0 |
| 227228 | 1 | 0 | 0 | 0 | 0 |
| 228229 | 1 | 0 | 0 | 0 | 0 |
| 228235 | 2 | 0 | 0 | 0 | 0 |
| 229230 | 1 | 0 | 0 | 0 | 0 |
| 229231 | 1 | 0 | 0 | 0 | 0 |
| 229232 | 1 | 0 | 0 | 0 | 0 |
| 232233 | 1 | 0 | 0 | 0 | 0 |
| 232234 | 1 | 0 | 0 | 0 | 0 |
| 232291 | 1 | 0 | 0 | 0 | 0 |
| 236237 | 1 | 0 | 0 | 0 | 0 |
| 236238 | 1 | 0 | 0 | 0 | 0 |
| 236246 | 1 | 0 | 0 | 0 | 0 |
| 236248 | 1 | 0 | 0 | 0 | 0 |
| 239240 | 1 | 0 | 0 | 0 | 0 |
| 239241 | 1 | 0 | 0 | 0 | 0 |
| 239242 | 1 | 0 | 0 | 0 | 0 |
| 242243 | 1 | 0 | 0 | 0 | 0 |
| 242244 | 1 | 0 | 0 | 0 | 0 |
| 242245 | 1 | 0 | 0 | 0 | 0 |
| 245246 | 1 | 0 | 0 | 0 | 0 |
| 245247 | 2 | 0 | 0 | 0 | 0 |
| 248249 | 1 | 0 | 0 | 0 | 0 |
| 248250 | 1 | 0 | 0 | 0 | 0 |
| 248251 | 1 | 0 | 0 | 0 | 0 |
| 251252 | 1 | 0 | 0 | 0 | 0 |
| 252253 | 1 | 0 | 0 | 0 | 0 |
| 252254 | 1 | 0 | 0 | 0 | 0 |
| 252255 | 1 | 0 | 0 | 0 | 0 |
| 255256 | 1 | 0 | 0 | 0 | 0 |
| 255257 | 1 | 0 | 0 | 0 | 0 |
| 255258 | 1 | 0 | 0 | 0 | 0 |
| 258259 | 1 | 0 | 0 | 0 | 0 |
| 258260 | 1 | 0 | 0 | 0 | 0 |
| 258261 | 1 | 0 | 0 | 0 | 0 |
| 261262 | 1 | 0 | 0 | 0 | 0 |
| 261263 | 1 | 0 | 0 | 0 | 0 |
| 261264 | 1 | 0 | 0 | 0 | 0 |
| 264265 | 1 | 0 | 0 | 0 | 0 |
| 264266 | 1 | 0 | 0 | 0 | 0 |
| 264267 | 1 | 0 | 0 | 0 | 0 |
| 267268 | 1 | 0 | 0 | 0 | 0 |
| 267269 | 1 | 0 | 0 | 0 | 0 |
| 267270 | 1 | 0 | 0 | 0 | 0 |
| 270271 | 1 | 0 | 0 | 0 | 0 |
| 271272 | 1 | 0 | 0 | 0 | 0 |
| 271273 | 1 | 0 | 0 | 0 | 0 |
| 274275 | 1 | 0 | 0 | 0 | 0 |
| 274276 | 1 | 0 | 0 | 0 | 0 |
| 276277 | 1 | 0 | 0 | 0 | 0 |
| 276278 | 1 | 0 | 0 | 0 | 0 |

```

276279 1 0 0 0 0
279280 1 0 0 0 0
279281 1 0 0 0 0
279282 1 0 0 0 0
282283 1 0 0 0 0
282284 1 0 0 0 0
282285 1 0 0 0 0
285286 1 0 0 0 0
285287 1 0 0 0 0
285288 1 0 0 0 0
288289 1 0 0 0 0
288290 1 0 0 0 0
288291 1 0 0 0 0
291308 1 0 0 0 0
292293 1 0 0 0 0
292294 1 0 0 0 0
292295 1 0 0 0 0
292340 1 0 0 0 0
295296 1 0 0 0 0
296297 1 0 0 0 0
296304 2 0 0 0 0
297298 1 0 0 0 0
297299 1 0 0 0 0
297300 1 0 0 0 0
300301 1 0 0 0 0
300302 1 0 0 0 0
300303 1 0 0 0 0
305306 1 0 0 0 0
305307 1 0 0 0 0
305315 1 0 0 0 0
305317 1 0 0 0 0
308309 1 0 0 0 0
308310 1 0 0 0 0
308311 1 0 0 0 0
311312 1 0 0 0 0
311313 1 0 0 0 0
311314 1 0 0 0 0
314315 1 0 0 0 0
314316 2 0 0 0 0
317318 1 0 0 0 0
317319 1 0 0 0 0
317320 1 0 0 0 0
320321 1 0 0 0 0
321322 1 0 0 0 0
321323 1 0 0 0 0
321324 1 0 0 0 0
324325 1 0 0 0 0
324326 1 0 0 0 0
324327 1 0 0 0 0
327328 1 0 0 0 0
327329 1 0 0 0 0
327330 1 0 0 0 0
330331 1 0 0 0 0
330332 1 0 0 0 0
330333 1 0 0 0 0
333334 1 0 0 0 0
333335 1 0 0 0 0
333336 1 0 0 0 0
336337 1 0 0 0 0
336338 1 0 0 0 0
336339 1 0 0 0 0
339340 1 0 0 0 0
340341 1 0 0 0 0
340342 1 0 0 0 0

```

```

M END
> <NAME>
U32_1

```

```

$$$$
U36_1
MOE2012 3D

```

```

357356 0 0 1 0 0 0 0 0999 V2000
19.7990 14.0460 -5.4030 O 0 0 0 0 0 0 0 0 0 0 0 0 0 0 0
20.0780 14.9660 -5.5470 H 0 0 0 0 0 0 0 0 0 0 0 0 0 0 0
20.9830 13.2670 -5.2900 C 0 0 0 0 0 0 0 0 0 0 0 0 0 0 0
21.5620 13.3790 -6.2120 H 0 0 0 0 0 0 0 0 0 0 0 0 0 0 0
21.5710 13.6510 -4.4510 H 0 0 0 0 0 0 0 0 0 0 0 0 0 0 0
20.6010 11.8100 -5.0640 C 0 0 0 0 0 0 0 0 0 0 0 0 0 0 0
19.9750 11.7350 -4.1650 H 0 0 0 0 0 0 0 0 0 0 0 0 0 0 0
19.9740 11.4650 -5.8950 H 0 0 0 0 0 0 0 0 0 0 0 0 0 0 0

```

|         |         |         |   |   |   |   |   |   |   |   |   |   |   |   |   |   |   |
|---------|---------|---------|---|---|---|---|---|---|---|---|---|---|---|---|---|---|---|
| 21.8340 | 10.9190 | -4.9250 | C | 0 | 0 | 0 | 0 | 0 | 0 | 0 | 0 | 0 | 0 | 0 | 0 | 0 | 0 |
| 22.4440 | 10.9930 | -5.8340 | H | 0 | 0 | 0 | 0 | 0 | 0 | 0 | 0 | 0 | 0 | 0 | 0 | 0 | 0 |
| 22.4520 | 11.2770 | -4.0920 | H | 0 | 0 | 0 | 0 | 0 | 0 | 0 | 0 | 0 | 0 | 0 | 0 | 0 | 0 |
| 21.4480 | 9.4580  | -4.6850 | C | 0 | 0 | 0 | 0 | 0 | 0 | 0 | 0 | 0 | 0 | 0 | 0 | 0 | 0 |
| 20.8290 | 9.3860  | -3.7820 | H | 0 | 0 | 0 | 0 | 0 | 0 | 0 | 0 | 0 | 0 | 0 | 0 | 0 | 0 |
| 20.8410 | 9.0950  | -5.5230 | H | 0 | 0 | 0 | 0 | 0 | 0 | 0 | 0 | 0 | 0 | 0 | 0 | 0 | 0 |
| 22.6890 | 8.5730  | -4.5260 | C | 0 | 0 | 0 | 0 | 0 | 0 | 0 | 0 | 0 | 0 | 0 | 0 | 0 | 0 |
| 23.2980 | 8.6310  | -5.4360 | H | 0 | 0 | 0 | 0 | 0 | 0 | 0 | 0 | 0 | 0 | 0 | 0 | 0 | 0 |
| 23.2960 | 8.9640  | -3.7020 | H | 0 | 0 | 0 | 0 | 0 | 0 | 0 | 0 | 0 | 0 | 0 | 0 | 0 | 0 |
| 22.3000 | 7.1150  | -4.2570 | C | 0 | 0 | 0 | 0 | 0 | 0 | 0 | 0 | 0 | 0 | 0 | 0 | 0 | 0 |
| 21.7000 | 7.0370  | -3.3410 | H | 0 | 0 | 0 | 0 | 0 | 0 | 0 | 0 | 0 | 0 | 0 | 0 | 0 | 0 |
| 21.6580 | 6.7710  | -5.0770 | H | 0 | 0 | 0 | 0 | 0 | 0 | 0 | 0 | 0 | 0 | 0 | 0 | 0 | 0 |
| 23.4510 | 6.2070  | -4.1920 | N | 0 | 0 | 3 | 0 | 0 | 0 | 0 | 0 | 0 | 0 | 0 | 0 | 0 | 0 |
| 23.1010 | 5.2480  | -4.2000 | H | 0 | 0 | 0 | 0 | 0 | 0 | 0 | 0 | 0 | 0 | 0 | 0 | 0 | 0 |
| 37.8150 | 10.0230 | -6.0140 | C | 0 | 0 | 0 | 0 | 0 | 0 | 0 | 0 | 0 | 0 | 0 | 0 | 0 | 0 |
| 37.0130 | 10.6600 | -6.4060 | H | 0 | 0 | 0 | 0 | 0 | 0 | 0 | 0 | 0 | 0 | 0 | 0 | 0 | 0 |
| 37.4390 | 8.9960  | -6.0810 | H | 0 | 0 | 0 | 0 | 0 | 0 | 0 | 0 | 0 | 0 | 0 | 0 | 0 | 0 |
| 38.9900 | 10.0840 | -6.8370 | O | 0 | 0 | 0 | 0 | 0 | 0 | 0 | 0 | 0 | 0 | 0 | 0 | 0 | 0 |
| 39.2700 | 11.3080 | -7.3700 | C | 0 | 0 | 0 | 0 | 0 | 0 | 0 | 0 | 0 | 0 | 0 | 0 | 0 | 0 |
| 40.4710 | 11.2250 | -8.2760 | C | 0 | 0 | 0 | 0 | 0 | 0 | 0 | 0 | 0 | 0 | 0 | 0 | 0 | 0 |
| 40.9380 | 10.2380 | -8.1920 | H | 0 | 0 | 0 | 0 | 0 | 0 | 0 | 0 | 0 | 0 | 0 | 0 | 0 | 0 |
| 40.1060 | 11.3120 | -9.3060 | H | 0 | 0 | 0 | 0 | 0 | 0 | 0 | 0 | 0 | 0 | 0 | 0 | 0 | 0 |
| 41.4660 | 12.3470 | -7.9770 | C | 0 | 0 | 0 | 0 | 0 | 0 | 0 | 0 | 0 | 0 | 0 | 0 | 0 | 0 |
| 40.9240 | 13.2990 | -8.0450 | H | 0 | 0 | 0 | 0 | 0 | 0 | 0 | 0 | 0 | 0 | 0 | 0 | 0 | 0 |
| 42.2380 | 12.3760 | -8.7570 | H | 0 | 0 | 0 | 0 | 0 | 0 | 0 | 0 | 0 | 0 | 0 | 0 | 0 | 0 |
| 38.6200 | 12.3270 | -7.1800 | O | 0 | 0 | 0 | 0 | 0 | 0 | 0 | 0 | 0 | 0 | 0 | 0 | 0 | 0 |
| 28.4280 | 5.1420  | -0.8850 | C | 0 | 0 | 0 | 0 | 0 | 0 | 0 | 0 | 0 | 0 | 0 | 0 | 0 | 0 |
| 27.9640 | 5.1400  | 0.1100  | H | 0 | 0 | 0 | 0 | 0 | 0 | 0 | 0 | 0 | 0 | 0 | 0 | 0 | 0 |
| 29.1000 | 4.2770  | -0.9030 | H | 0 | 0 | 0 | 0 | 0 | 0 | 0 | 0 | 0 | 0 | 0 | 0 | 0 | 0 |
| 24.2600 | 6.4120  | -2.9890 | C | 0 | 0 | 0 | 0 | 0 | 0 | 0 | 0 | 0 | 0 | 0 | 0 | 0 | 0 |
| 24.7020 | 7.4140  | -2.9880 | H | 0 | 0 | 0 | 0 | 0 | 0 | 0 | 0 | 0 | 0 | 0 | 0 | 0 | 0 |
| 23.6370 | 6.3200  | -2.0900 | H | 0 | 0 | 0 | 0 | 0 | 0 | 0 | 0 | 0 | 0 | 0 | 0 | 0 | 0 |
| 25.3830 | 5.3790  | -2.9410 | C | 0 | 0 | 0 | 0 | 0 | 0 | 0 | 0 | 0 | 0 | 0 | 0 | 0 | 0 |
| 24.9780 | 4.3640  | -2.8550 | H | 0 | 0 | 0 | 0 | 0 | 0 | 0 | 0 | 0 | 0 | 0 | 0 | 0 | 0 |
| 25.9850 | 5.4480  | -3.8550 | H | 0 | 0 | 0 | 0 | 0 | 0 | 0 | 0 | 0 | 0 | 0 | 0 | 0 | 0 |
| 26.2810 | 5.6340  | -1.7590 | C | 0 | 0 | 0 | 0 | 0 | 0 | 0 | 0 | 0 | 0 | 0 | 0 | 0 | 0 |
| 27.4510 | 4.9510  | -1.9190 | O | 0 | 0 | 0 | 0 | 0 | 0 | 0 | 0 | 0 | 0 | 0 | 0 | 0 | 0 |
| 26.0010 | 6.3400  | -0.8010 | O | 0 | 0 | 0 | 0 | 0 | 0 | 0 | 0 | 0 | 0 | 0 | 0 | 0 | 0 |
| 29.2240 | 6.4190  | -1.1310 | C | 0 | 0 | 0 | 0 | 0 | 0 | 0 | 0 | 0 | 0 | 0 | 0 | 0 | 0 |
| 29.7080 | 6.3630  | -2.1120 | H | 0 | 0 | 0 | 0 | 0 | 0 | 0 | 0 | 0 | 0 | 0 | 0 | 0 | 0 |
| 28.5560 | 7.2880  | -1.1420 | H | 0 | 0 | 0 | 0 | 0 | 0 | 0 | 0 | 0 | 0 | 0 | 0 | 0 | 0 |
| 30.1910 | 6.5700  | -0.0960 | O | 0 | 0 | 0 | 0 | 0 | 0 | 0 | 0 | 0 | 0 | 0 | 0 | 0 | 0 |
| 31.0170 | 7.7230  | -0.2710 | C | 0 | 0 | 0 | 0 | 0 | 0 | 0 | 0 | 0 | 0 | 0 | 0 | 0 | 0 |
| 30.4300 | 8.5650  | -0.6580 | H | 0 | 0 | 0 | 0 | 0 | 0 | 0 | 0 | 0 | 0 | 0 | 0 | 0 | 0 |
| 31.3780 | 8.0080  | 0.7230  | H | 0 | 0 | 0 | 0 | 0 | 0 | 0 | 0 | 0 | 0 | 0 | 0 | 0 | 0 |
| 32.2130 | 7.4070  | -1.1690 | C | 0 | 0 | 0 | 0 | 0 | 0 | 0 | 0 | 0 | 0 | 0 | 0 | 0 | 0 |
| 32.7870 | 6.5830  | -0.7270 | H | 0 | 0 | 0 | 0 | 0 | 0 | 0 | 0 | 0 | 0 | 0 | 0 | 0 | 0 |
| 31.8670 | 7.0420  | -2.1430 | H | 0 | 0 | 0 | 0 | 0 | 0 | 0 | 0 | 0 | 0 | 0 | 0 | 0 | 0 |
| 33.1090 | 8.6300  | -1.3680 | C | 0 | 0 | 0 | 0 | 0 | 0 | 0 | 0 | 0 | 0 | 0 | 0 | 0 | 0 |
| 32.5220 | 9.4370  | -1.8240 | H | 0 | 0 | 0 | 0 | 0 | 0 | 0 | 0 | 0 | 0 | 0 | 0 | 0 | 0 |
| 33.4590 | 8.9960  | -0.3950 | H | 0 | 0 | 0 | 0 | 0 | 0 | 0 | 0 | 0 | 0 | 0 | 0 | 0 | 0 |
| 34.3150 | 8.3090  | -2.2570 | C | 0 | 0 | 0 | 0 | 0 | 0 | 0 | 0 | 0 | 0 | 0 | 0 | 0 | 0 |
| 34.9410 | 7.5530  | -1.7680 | H | 0 | 0 | 0 | 0 | 0 | 0 | 0 | 0 | 0 | 0 | 0 | 0 | 0 | 0 |
| 33.9670 | 7.8790  | -3.2040 | H | 0 | 0 | 0 | 0 | 0 | 0 | 0 | 0 | 0 | 0 | 0 | 0 | 0 | 0 |
| 35.1450 | 9.5600  | -2.5430 | C | 0 | 0 | 0 | 0 | 0 | 0 | 0 | 0 | 0 | 0 | 0 | 0 | 0 | 0 |
| 34.5180 | 10.3230 | -3.0240 | H | 0 | 0 | 0 | 0 | 0 | 0 | 0 | 0 | 0 | 0 | 0 | 0 | 0 | 0 |
| 35.4950 | 10.0090 | -1.6050 | H | 0 | 0 | 0 | 0 | 0 | 0 | 0 | 0 | 0 | 0 | 0 | 0 | 0 | 0 |
| 36.3460 | 9.2620  | -3.4380 | C | 0 | 0 | 0 | 0 | 0 | 0 | 0 | 0 | 0 | 0 | 0 | 0 | 0 | 0 |
| 37.0540 | 8.6070  | -2.9180 | H | 0 | 0 | 0 | 0 | 0 | 0 | 0 | 0 | 0 | 0 | 0 | 0 | 0 | 0 |
| 36.0080 | 8.7710  | -4.3560 | H | 0 | 0 | 0 | 0 | 0 | 0 | 0 | 0 | 0 | 0 | 0 | 0 | 0 | 0 |
| 36.9770 | 10.5020 | -3.7540 | O | 0 | 0 | 0 | 0 | 0 | 0 | 0 | 0 | 0 | 0 | 0 | 0 | 0 | 0 |
| 38.1450 | 10.3690 | -4.5640 | C | 0 | 0 | 0 | 0 | 0 | 0 | 0 | 0 | 0 | 0 | 0 | 0 | 0 | 0 |
| 38.8320 | 9.6330  | -4.1310 | H | 0 | 0 | 0 | 0 | 0 | 0 | 0 | 0 | 0 | 0 | 0 | 0 | 0 | 0 |
| 38.6710 | 11.3300 | -4.5270 | H | 0 | 0 | 0 | 0 | 0 | 0 | 0 | 0 | 0 | 0 | 0 | 0 | 0 | 0 |
| 45.8380 | 17.5890 | -0.8400 | O | 0 | 0 | 0 | 0 | 0 | 0 | 0 | 0 | 0 | 0 | 0 | 0 | 0 | 0 |
| 46.1360 | 17.5640 | 0.0850  | H | 0 | 0 | 0 | 0 | 0 | 0 | 0 | 0 | 0 | 0 | 0 | 0 | 0 | 0 |
| 45.2960 | 16.3080 | -1.1360 | C | 0 | 0 | 0 | 0 | 0 | 0 | 0 | 0 | 0 | 0 | 0 | 0 | 0 | 0 |
| 46.0770 | 15.5570 | -0.9820 | H | 0 | 0 | 0 | 0 | 0 | 0 | 0 | 0 | 0 | 0 | 0 | 0 | 0 | 0 |
| 44.4710 | 16.1110 | -0.4430 | H | 0 | 0 | 0 | 0 | 0 | 0 | 0 | 0 | 0 | 0 | 0 | 0 | 0 | 0 |
| 44.8060 | 16.2940 | -2.5790 | C | 0 | 0 | 0 | 0 | 0 | 0 | 0 | 0 | 0 | 0 | 0 | 0 | 0 | 0 |
| 44.0570 | 17.0840 | -2.7170 | H | 0 | 0 | 0 | 0 | 0 | 0 | 0 | 0 | 0 | 0 | 0 | 0 | 0 | 0 |
| 45.6380 | 16.5500 | -3.2460 | H | 0 | 0 | 0 | 0 | 0 | 0 | 0 | 0 | 0 | 0 | 0 | 0 | 0 | 0 |
| 44.2200 | 14.9360 | -2.9610 | C | 0 | 0 | 0 | 0 | 0 | 0 | 0 | 0 | 0 | 0 | 0 | 0 | 0 | 0 |
| 44.9790 | 14.1570 | -2.8150 | H | 0 | 0 | 0 | 0 | 0 | 0 | 0 | 0 | 0 | 0 | 0 | 0 | 0 | 0 |
| 43.3820 | 14.6970 | -2.2950 | H | 0 | 0 | 0 | 0 | 0 | 0 | 0 | 0 | 0 | 0 | 0 | 0 | 0 | 0 |
| 43.7400 | 14.9150 | -4.4150 | C | 0 | 0 | 0 | 0 | 0 | 0 | 0 | 0 | 0 | 0 | 0 | 0 | 0 | 0 |
| 42.9690 | 15.6820 | -4.5580 | H | 0 | 0 | 0 | 0 | 0 | 0 | 0 | 0 | 0 | 0 | 0 | 0 | 0 | 0 |
| 44.5750 | 15.1650 | -5.0810 | H | 0 | 0 | 0 | 0 | 0 | 0 | 0 | 0 | 0 | 0 | 0 | 0 | 0 | 0 |
| 43.1780 | 13.5400 | -4.7930 | C | 0 | 0 | 0 | 0 | 0 | 0 | 0 | 0 | 0 | 0 | 0 | 0 | 0 | 0 |
| 43.9530 | 12.7880 | -4.6150 | H | 0 | 0 | 0 | 0 | 0 | 0 | 0 | 0 | 0 | 0 | 0 | 0 | 0 | 0 |
| 42.3320 | 13.3000 | -4.1360 | H | 0 | 0 | 0 | 0 | 0 | 0 | 0 | 0 | 0 | 0 | 0 | 0 | 0 | 0 |

|         |         |         |   |   |   |   |   |   |   |   |   |   |   |   |
|---------|---------|---------|---|---|---|---|---|---|---|---|---|---|---|---|
| 42.7180 | 13.5030 | -6.2590 | C | 0 | 0 | 0 | 0 | 0 | 0 | 0 | 0 | 0 | 0 | 0 |
| 41.9860 | 14.3110 | -6.3860 | H | 0 | 0 | 0 | 0 | 0 | 0 | 0 | 0 | 0 | 0 | 0 |
| 43.5610 | 13.7310 | -6.9230 | H | 0 | 0 | 0 | 0 | 0 | 0 | 0 | 0 | 0 | 0 | 0 |
| 42.0880 | 12.2230 | -6.6430 | N | 0 | 0 | 3 | 0 | 0 | 0 | 0 | 0 | 0 | 0 | 0 |
| 40.7360 | 2.7650  | 3.6530  | C | 0 | 0 | 0 | 0 | 0 | 0 | 0 | 0 | 0 | 0 | 0 |
| 40.4920 | 1.7800  | 3.2380  | H | 0 | 0 | 0 | 0 | 0 | 0 | 0 | 0 | 0 | 0 | 0 |
| 40.8330 | 3.4740  | 2.8230  | H | 0 | 0 | 0 | 0 | 0 | 0 | 0 | 0 | 0 | 0 | 0 |
| 39.6890 | 3.1960  | 4.5330  | O | 0 | 0 | 0 | 0 | 0 | 0 | 0 | 0 | 0 | 0 | 0 |
| 38.4850 | 3.3920  | 3.9230  | C | 0 | 0 | 0 | 0 | 0 | 0 | 0 | 0 | 0 | 0 | 0 |
| 37.4670 | 3.8950  | 4.9140  | C | 0 | 0 | 0 | 0 | 0 | 0 | 0 | 0 | 0 | 0 | 0 |
| 37.8980 | 3.9300  | 5.9190  | H | 0 | 0 | 0 | 0 | 0 | 0 | 0 | 0 | 0 | 0 | 0 |
| 37.2440 | 4.9340  | 4.6420  | H | 0 | 0 | 0 | 0 | 0 | 0 | 0 | 0 | 0 | 0 | 0 |
| 36.1870 | 3.0600  | 4.8710  | C | 0 | 0 | 0 | 0 | 0 | 0 | 0 | 0 | 0 | 0 | 0 |
| 35.8340 | 3.0500  | 3.8310  | H | 0 | 0 | 0 | 0 | 0 | 0 | 0 | 0 | 0 | 0 | 0 |
| 35.4080 | 3.5660  | 5.4560  | H | 0 | 0 | 0 | 0 | 0 | 0 | 0 | 0 | 0 | 0 | 0 |
| 38.2660 | 3.2330  | 2.7290  | O | 0 | 0 | 0 | 0 | 0 | 0 | 0 | 0 | 0 | 0 | 0 |
| 44.1910 | 7.1110  | -4.0920 | C | 0 | 0 | 0 | 0 | 0 | 0 | 0 | 0 | 0 | 0 | 0 |
| 45.1780 | 7.1950  | -4.5630 | H | 0 | 0 | 0 | 0 | 0 | 0 | 0 | 0 | 0 | 0 | 0 |
| 44.3880 | 6.9600  | -3.0260 | H | 0 | 0 | 0 | 0 | 0 | 0 | 0 | 0 | 0 | 0 | 0 |
| 43.0400 | 11.0990 | -6.5880 | C | 0 | 0 | 0 | 0 | 0 | 0 | 0 | 0 | 0 | 0 | 0 |
| 43.0340 | 10.5210 | -7.5210 | H | 0 | 0 | 0 | 0 | 0 | 0 | 0 | 0 | 0 | 0 | 0 |
| 44.0790 | 11.4410 | -6.4900 | H | 0 | 0 | 0 | 0 | 0 | 0 | 0 | 0 | 0 | 0 | 0 |
| 42.6720 | 10.1780 | -5.4270 | C | 0 | 0 | 0 | 0 | 0 | 0 | 0 | 0 | 0 | 0 | 0 |
| 42.7700 | 10.7060 | -4.4730 | H | 0 | 0 | 0 | 0 | 0 | 0 | 0 | 0 | 0 | 0 | 0 |
| 41.6410 | 9.8200  | -5.5280 | H | 0 | 0 | 0 | 0 | 0 | 0 | 0 | 0 | 0 | 0 | 0 |
| 43.5750 | 8.9760  | -5.4060 | C | 0 | 0 | 0 | 0 | 0 | 0 | 0 | 0 | 0 | 0 | 0 |
| 43.4390 | 8.3260  | -4.2150 | O | 0 | 0 | 0 | 0 | 0 | 0 | 0 | 0 | 0 | 0 | 0 |
| 44.2910 | 8.6190  | -6.3300 | O | 0 | 0 | 0 | 0 | 0 | 0 | 0 | 0 | 0 | 0 | 0 |
| 43.3960 | 5.9420  | -4.6650 | C | 0 | 0 | 0 | 0 | 0 | 0 | 0 | 0 | 0 | 0 | 0 |
| 42.4210 | 5.8500  | -4.1720 | H | 0 | 0 | 0 | 0 | 0 | 0 | 0 | 0 | 0 | 0 | 0 |
| 43.1830 | 6.1270  | -5.7230 | H | 0 | 0 | 0 | 0 | 0 | 0 | 0 | 0 | 0 | 0 | 0 |
| 44.1610 | 4.7440  | -4.5920 | O | 0 | 0 | 0 | 0 | 0 | 0 | 0 | 0 | 0 | 0 | 0 |
| 43.6860 | 3.7960  | -3.6360 | C | 0 | 0 | 0 | 0 | 0 | 0 | 0 | 0 | 0 | 0 | 0 |
| 42.6220 | 3.5940  | -3.8070 | H | 0 | 0 | 0 | 0 | 0 | 0 | 0 | 0 | 0 | 0 | 0 |
| 44.2270 | 2.8620  | -3.8260 | H | 0 | 0 | 0 | 0 | 0 | 0 | 0 | 0 | 0 | 0 | 0 |
| 43.9490 | 4.2510  | -2.2030 | C | 0 | 0 | 0 | 0 | 0 | 0 | 0 | 0 | 0 | 0 | 0 |
| 45.0070 | 4.5190  | -2.0960 | H | 0 | 0 | 0 | 0 | 0 | 0 | 0 | 0 | 0 | 0 | 0 |
| 43.3800 | 5.1650  | -1.9960 | H | 0 | 0 | 0 | 0 | 0 | 0 | 0 | 0 | 0 | 0 | 0 |
| 43.5660 | 3.1840  | -1.1800 | C | 0 | 0 | 0 | 0 | 0 | 0 | 0 | 0 | 0 | 0 | 0 |
| 42.5060 | 2.9290  | -1.2960 | H | 0 | 0 | 0 | 0 | 0 | 0 | 0 | 0 | 0 | 0 | 0 |
| 44.1430 | 2.2700  | -1.3600 | H | 0 | 0 | 0 | 0 | 0 | 0 | 0 | 0 | 0 | 0 | 0 |
| 43.8240 | 3.6840  | 0.2430  | C | 0 | 0 | 0 | 0 | 0 | 0 | 0 | 0 | 0 | 0 | 0 |
| 44.8920 | 3.9010  | 0.3680  | H | 0 | 0 | 0 | 0 | 0 | 0 | 0 | 0 | 0 | 0 | 0 |
| 43.2830 | 4.6260  | 0.4020  | H | 0 | 0 | 0 | 0 | 0 | 0 | 0 | 0 | 0 | 0 | 0 |
| 43.3810 | 2.6650  | 1.2880  | C | 0 | 0 | 0 | 0 | 0 | 0 | 0 | 0 | 0 | 0 | 0 |
| 42.3190 | 2.4270  | 1.1550  | H | 0 | 0 | 0 | 0 | 0 | 0 | 0 | 0 | 0 | 0 | 0 |
| 43.9190 | 1.7190  | 1.1530  | H | 0 | 0 | 0 | 0 | 0 | 0 | 0 | 0 | 0 | 0 | 0 |
| 43.6200 | 3.1850  | 2.7030  | C | 0 | 0 | 0 | 0 | 0 | 0 | 0 | 0 | 0 | 0 | 0 |
| 44.6950 | 3.2970  | 2.8790  | H | 0 | 0 | 0 | 0 | 0 | 0 | 0 | 0 | 0 | 0 | 0 |
| 43.1580 | 4.1690  | 2.8490  | H | 0 | 0 | 0 | 0 | 0 | 0 | 0 | 0 | 0 | 0 | 0 |
| 43.1340 | 2.2250  | 3.6420  | O | 0 | 0 | 0 | 0 | 0 | 0 | 0 | 0 | 0 | 0 | 0 |
| 42.0430 | 2.6870  | 4.4360  | C | 0 | 0 | 0 | 0 | 0 | 0 | 0 | 0 | 0 | 0 | 0 |
| 42.2880 | 3.6490  | 4.9020  | H | 0 | 0 | 0 | 0 | 0 | 0 | 0 | 0 | 0 | 0 | 0 |
| 41.9190 | 1.9780  | 5.2640  | H | 0 | 0 | 0 | 0 | 0 | 0 | 0 | 0 | 0 | 0 | 0 |
| 28.2100 | -1.3770 | 4.2980  | O | 0 | 0 | 0 | 0 | 0 | 0 | 0 | 0 | 0 | 0 | 0 |
| 27.2950 | -1.0830 | 4.4480  | H | 0 | 0 | 0 | 0 | 0 | 0 | 0 | 0 | 0 | 0 | 0 |
| 29.0580 | -0.3530 | 4.8010  | C | 0 | 0 | 0 | 0 | 0 | 0 | 0 | 0 | 0 | 0 | 0 |
| 28.7600 | 0.6000  | 4.3510  | H | 0 | 0 | 0 | 0 | 0 | 0 | 0 | 0 | 0 | 0 | 0 |
| 28.9210 | -0.2920 | 5.8850  | H | 0 | 0 | 0 | 0 | 0 | 0 | 0 | 0 | 0 | 0 | 0 |
| 30.5020 | -0.6850 | 4.4500  | C | 0 | 0 | 0 | 0 | 0 | 0 | 0 | 0 | 0 | 0 | 0 |
| 30.7510 | -1.6830 | 4.8320  | H | 0 | 0 | 0 | 0 | 0 | 0 | 0 | 0 | 0 | 0 | 0 |
| 30.6040 | -0.7480 | 3.3590  | H | 0 | 0 | 0 | 0 | 0 | 0 | 0 | 0 | 0 | 0 | 0 |
| 31.4720 | 0.3520  | 5.0150  | C | 0 | 0 | 0 | 0 | 0 | 0 | 0 | 0 | 0 | 0 | 0 |
| 31.1950 | 1.3500  | 4.6540  | H | 0 | 0 | 0 | 0 | 0 | 0 | 0 | 0 | 0 | 0 | 0 |
| 31.3880 | 0.3700  | 6.1090  | H | 0 | 0 | 0 | 0 | 0 | 0 | 0 | 0 | 0 | 0 | 0 |
| 32.9180 | 0.0490  | 4.6140  | C | 0 | 0 | 0 | 0 | 0 | 0 | 0 | 0 | 0 | 0 | 0 |
| 33.1850 | -0.9650 | 4.9360  | H | 0 | 0 | 0 | 0 | 0 | 0 | 0 | 0 | 0 | 0 | 0 |
| 33.0070 | 0.0770  | 3.5220  | H | 0 | 0 | 0 | 0 | 0 | 0 | 0 | 0 | 0 | 0 | 0 |
| 33.8910 | 1.0550  | 5.2390  | C | 0 | 0 | 0 | 0 | 0 | 0 | 0 | 0 | 0 | 0 | 0 |
| 33.5930 | 2.0690  | 4.9480  | H | 0 | 0 | 0 | 0 | 0 | 0 | 0 | 0 | 0 | 0 | 0 |
| 33.8080 | 0.9900  | 6.3290  | H | 0 | 0 | 0 | 0 | 0 | 0 | 0 | 0 | 0 | 0 | 0 |
| 35.3360 | 0.7810  | 4.7940  | C | 0 | 0 | 0 | 0 | 0 | 0 | 0 | 0 | 0 | 0 | 0 |
| 35.5970 | -0.2600 | 5.0200  | H | 0 | 0 | 0 | 0 | 0 | 0 | 0 | 0 | 0 | 0 | 0 |
| 35.3860 | 0.8340  | 3.6970  | H | 0 | 0 | 0 | 0 | 0 | 0 | 0 | 0 | 0 | 0 | 0 |
| 36.3740 | 1.6750  | 5.3480  | N | 0 | 0 | 3 | 0 | 0 | 0 | 0 | 0 | 0 | 0 | 0 |
| 49.4590 | 0.3650  | 9.7330  | C | 0 | 0 | 0 | 0 | 0 | 0 | 0 | 0 | 0 | 0 | 0 |
| 49.7230 | 1.3530  | 9.3370  | H | 0 | 0 | 0 | 0 | 0 | 0 | 0 | 0 | 0 | 0 | 0 |
| 48.5830 | 0.0380  | 9.1650  | H | 0 | 0 | 0 | 0 | 0 | 0 | 0 | 0 | 0 | 0 | 0 |
| 50.4990 | -0.5970 | 9.4860  | O | 0 | 0 | 0 | 0 | 0 | 0 | 0 | 0 | 0 | 0 | 0 |
| 51.7820 | -0.1590 | 9.6410  | C | 0 | 0 | 0 | 0 | 0 | 0 | 0 | 0 | 0 | 0 | 0 |
| 52.7460 | -1.2770 | 9.3240  | C | 0 | 0 | 0 | 0 | 0 | 0 | 0 | 0 | 0 | 0 | 0 |

|         |          |         |   |   |   |   |   |   |   |   |   |   |   |   |   |   |   |
|---------|----------|---------|---|---|---|---|---|---|---|---|---|---|---|---|---|---|---|
| 52.2660 | -2.2500  | 9.4770  | H | 0 | 0 | 0 | 0 | 0 | 0 | 0 | 0 | 0 | 0 | 0 | 0 | 0 | 0 |
| 52.9600 | -1.1960  | 8.2500  | H | 0 | 0 | 0 | 0 | 0 | 0 | 0 | 0 | 0 | 0 | 0 | 0 | 0 | 0 |
| 54.0620 | -1.1940  | 10.1080 | C | 0 | 0 | 0 | 0 | 0 | 0 | 0 | 0 | 0 | 0 | 0 | 0 | 0 | 0 |
| 54.3400 | -0.1600  | 10.3470 | H | 0 | 0 | 0 | 0 | 0 | 0 | 0 | 0 | 0 | 0 | 0 | 0 | 0 | 0 |
| 54.8310 | -1.5650  | 9.4180  | H | 0 | 0 | 0 | 0 | 0 | 0 | 0 | 0 | 0 | 0 | 0 | 0 | 0 | 0 |
| 52.1060 | 0.9800   | 9.9470  | O | 0 | 0 | 0 | 0 | 0 | 0 | 0 | 0 | 0 | 0 | 0 | 0 | 0 | 0 |
| 38.8270 | 0.3530   | 10.4350 | C | 0 | 0 | 0 | 0 | 0 | 0 | 0 | 0 | 0 | 0 | 0 | 0 | 0 | 0 |
| 38.1320 | -0.1760  | 11.1000 | H | 0 | 0 | 0 | 0 | 0 | 0 | 0 | 0 | 0 | 0 | 0 | 0 | 0 | 0 |
| 39.7850 | -0.1690  | 10.5350 | H | 0 | 0 | 0 | 0 | 0 | 0 | 0 | 0 | 0 | 0 | 0 | 0 | 0 | 0 |
| 36.4890 | 1.6110   | 6.8170  | C | 0 | 0 | 0 | 0 | 0 | 0 | 0 | 0 | 0 | 0 | 0 | 0 | 0 | 0 |
| 37.3020 | 2.2710   | 7.1430  | H | 0 | 0 | 0 | 0 | 0 | 0 | 0 | 0 | 0 | 0 | 0 | 0 | 0 | 0 |
| 35.5830 | 1.9970   | 7.3020  | H | 0 | 0 | 0 | 0 | 0 | 0 | 0 | 0 | 0 | 0 | 0 | 0 | 0 | 0 |
| 36.8100 | 0.2150   | 7.3490  | C | 0 | 0 | 0 | 0 | 0 | 0 | 0 | 0 | 0 | 0 | 0 | 0 | 0 | 0 |
| 35.9780 | -0.4850  | 7.2160  | H | 0 | 0 | 0 | 0 | 0 | 0 | 0 | 0 | 0 | 0 | 0 | 0 | 0 | 0 |
| 37.6780 | -0.2150  | 6.8370  | H | 0 | 0 | 0 | 0 | 0 | 0 | 0 | 0 | 0 | 0 | 0 | 0 | 0 | 0 |
| 37.0870 | 0.3060   | 8.8250  | C | 0 | 0 | 0 | 0 | 0 | 0 | 0 | 0 | 0 | 0 | 0 | 0 | 0 | 0 |
| 38.4270 | 0.2450   | 9.0610  | O | 0 | 0 | 0 | 0 | 0 | 0 | 0 | 0 | 0 | 0 | 0 | 0 | 0 | 0 |
| 36.2180 | 0.4560   | 9.6720  | O | 0 | 0 | 0 | 0 | 0 | 0 | 0 | 0 | 0 | 0 | 0 | 0 | 0 | 0 |
| 38.9760 | 1.8160   | 10.8360 | C | 0 | 0 | 0 | 0 | 0 | 0 | 0 | 0 | 0 | 0 | 0 | 0 | 0 | 0 |
| 39.6290 | 2.3500   | 10.1340 | H | 0 | 0 | 0 | 0 | 0 | 0 | 0 | 0 | 0 | 0 | 0 | 0 | 0 | 0 |
| 38.0020 | 2.3130   | 10.7840 | H | 0 | 0 | 0 | 0 | 0 | 0 | 0 | 0 | 0 | 0 | 0 | 0 | 0 | 0 |
| 39.4300 | 1.9040   | 12.1840 | O | 0 | 0 | 0 | 0 | 0 | 0 | 0 | 0 | 0 | 0 | 0 | 0 | 0 | 0 |
| 40.7320 | 2.4750   | 12.3280 | C | 0 | 0 | 0 | 0 | 0 | 0 | 0 | 0 | 0 | 0 | 0 | 0 | 0 | 0 |
| 40.7790 | 3.4350   | 11.8010 | H | 0 | 0 | 0 | 0 | 0 | 0 | 0 | 0 | 0 | 0 | 0 | 0 | 0 | 0 |
| 40.8680 | 2.6850   | 13.3950 | H | 0 | 0 | 0 | 0 | 0 | 0 | 0 | 0 | 0 | 0 | 0 | 0 | 0 | 0 |
| 41.8260 | 1.5180   | 11.8570 | C | 0 | 0 | 0 | 0 | 0 | 0 | 0 | 0 | 0 | 0 | 0 | 0 | 0 | 0 |
| 41.7170 | 0.5600   | 12.3800 | H | 0 | 0 | 0 | 0 | 0 | 0 | 0 | 0 | 0 | 0 | 0 | 0 | 0 | 0 |
| 41.6940 | 1.2960   | 10.7910 | H | 0 | 0 | 0 | 0 | 0 | 0 | 0 | 0 | 0 | 0 | 0 | 0 | 0 | 0 |
| 43.2240 | 2.0910   | 12.0830 | C | 0 | 0 | 0 | 0 | 0 | 0 | 0 | 0 | 0 | 0 | 0 | 0 | 0 | 0 |
| 43.3210 | 3.0440   | 11.5480 | H | 0 | 0 | 0 | 0 | 0 | 0 | 0 | 0 | 0 | 0 | 0 | 0 | 0 | 0 |
| 43.3710 | 2.3000   | 13.1490 | H | 0 | 0 | 0 | 0 | 0 | 0 | 0 | 0 | 0 | 0 | 0 | 0 | 0 | 0 |
| 44.3000 | 1.1170   | 11.5980 | C | 0 | 0 | 0 | 0 | 0 | 0 | 0 | 0 | 0 | 0 | 0 | 0 | 0 | 0 |
| 44.2140 | 0.1730   | 12.1500 | H | 0 | 0 | 0 | 0 | 0 | 0 | 0 | 0 | 0 | 0 | 0 | 0 | 0 | 0 |
| 44.1370 | 0.8860   | 10.5380 | H | 0 | 0 | 0 | 0 | 0 | 0 | 0 | 0 | 0 | 0 | 0 | 0 | 0 | 0 |
| 45.7040 | 1.6900   | 11.7810 | C | 0 | 0 | 0 | 0 | 0 | 0 | 0 | 0 | 0 | 0 | 0 | 0 | 0 | 0 |
| 45.8080 | 2.6290   | 11.2230 | H | 0 | 0 | 0 | 0 | 0 | 0 | 0 | 0 | 0 | 0 | 0 | 0 | 0 | 0 |
| 45.8770 | 1.9440   | 12.8340 | H | 0 | 0 | 0 | 0 | 0 | 0 | 0 | 0 | 0 | 0 | 0 | 0 | 0 | 0 |
| 46.7740 | 0.7050   | 11.3180 | C | 0 | 0 | 0 | 0 | 0 | 0 | 0 | 0 | 0 | 0 | 0 | 0 | 0 | 0 |
| 46.7090 | -0.2180  | 11.9040 | H | 0 | 0 | 0 | 0 | 0 | 0 | 0 | 0 | 0 | 0 | 0 | 0 | 0 | 0 |
| 46.6320 | 0.4670   | 10.2590 | H | 0 | 0 | 0 | 0 | 0 | 0 | 0 | 0 | 0 | 0 | 0 | 0 | 0 | 0 |
| 48.0530 | 1.3090   | 11.5110 | O | 0 | 0 | 0 | 0 | 0 | 0 | 0 | 0 | 0 | 0 | 0 | 0 | 0 | 0 |
| 49.1380 | 0.4300   | 11.2240 | C | 0 | 0 | 0 | 0 | 0 | 0 | 0 | 0 | 0 | 0 | 0 | 0 | 0 | 0 |
| 48.9490 | -0.5710  | 11.6300 | H | 0 | 0 | 0 | 0 | 0 | 0 | 0 | 0 | 0 | 0 | 0 | 0 | 0 | 0 |
| 50.0120 | 0.8120   | 11.7630 | H | 0 | 0 | 0 | 0 | 0 | 0 | 0 | 0 | 0 | 0 | 0 | 0 | 0 | 0 |
| 46.8090 | -2.5330  | 16.0630 | O | 0 | 0 | 0 | 0 | 0 | 0 | 0 | 0 | 0 | 0 | 0 | 0 | 0 | 0 |
| 46.0060 | -3.0810  | 16.0980 | H | 0 | 0 | 0 | 0 | 0 | 0 | 0 | 0 | 0 | 0 | 0 | 0 | 0 | 0 |
| 47.6500 | -3.0900  | 15.0610 | C | 0 | 0 | 0 | 0 | 0 | 0 | 0 | 0 | 0 | 0 | 0 | 0 | 0 | 0 |
| 47.9030 | -4.1150  | 15.3490 | H | 0 | 0 | 0 | 0 | 0 | 0 | 0 | 0 | 0 | 0 | 0 | 0 | 0 | 0 |
| 47.0950 | -3.1120  | 14.1170 | H | 0 | 0 | 0 | 0 | 0 | 0 | 0 | 0 | 0 | 0 | 0 | 0 | 0 | 0 |
| 48.9060 | -2.2360  | 14.9290 | C | 0 | 0 | 0 | 0 | 0 | 0 | 0 | 0 | 0 | 0 | 0 | 0 | 0 | 0 |
| 48.6180 | -1.2030  | 14.6960 | H | 0 | 0 | 0 | 0 | 0 | 0 | 0 | 0 | 0 | 0 | 0 | 0 | 0 | 0 |
| 49.4200 | -2.1930  | 15.8970 | H | 0 | 0 | 0 | 0 | 0 | 0 | 0 | 0 | 0 | 0 | 0 | 0 | 0 | 0 |
| 49.8480 | -2.7770  | 13.8530 | C | 0 | 0 | 0 | 0 | 0 | 0 | 0 | 0 | 0 | 0 | 0 | 0 | 0 | 0 |
| 50.1400 | -3.8040  | 14.1010 | H | 0 | 0 | 0 | 0 | 0 | 0 | 0 | 0 | 0 | 0 | 0 | 0 | 0 | 0 |
| 49.3190 | -2.8160  | 12.8930 | H | 0 | 0 | 0 | 0 | 0 | 0 | 0 | 0 | 0 | 0 | 0 | 0 | 0 | 0 |
| 51.1030 | -1.9100  | 13.7110 | C | 0 | 0 | 0 | 0 | 0 | 0 | 0 | 0 | 0 | 0 | 0 | 0 | 0 | 0 |
| 50.8120 | -0.8740  | 13.5060 | H | 0 | 0 | 0 | 0 | 0 | 0 | 0 | 0 | 0 | 0 | 0 | 0 | 0 | 0 |
| 51.6560 | -1.9070  | 14.6580 | H | 0 | 0 | 0 | 0 | 0 | 0 | 0 | 0 | 0 | 0 | 0 | 0 | 0 | 0 |
| 52.0110 | -2.4200  | 12.5870 | C | 0 | 0 | 0 | 0 | 0 | 0 | 0 | 0 | 0 | 0 | 0 | 0 | 0 | 0 |
| 52.3390 | -3.4410  | 12.8220 | H | 0 | 0 | 0 | 0 | 0 | 0 | 0 | 0 | 0 | 0 | 0 | 0 | 0 | 0 |
| 51.4330 | -2.4750  | 11.6580 | H | 0 | 0 | 0 | 0 | 0 | 0 | 0 | 0 | 0 | 0 | 0 | 0 | 0 | 0 |
| 53.2350 | -1.5150  | 12.3970 | C | 0 | 0 | 0 | 0 | 0 | 0 | 0 | 0 | 0 | 0 | 0 | 0 | 0 | 0 |
| 52.9150 | -0.4860  | 12.1930 | H | 0 | 0 | 0 | 0 | 0 | 0 | 0 | 0 | 0 | 0 | 0 | 0 | 0 | 0 |
| 53.7690 | -1.4530  | 13.3540 | H | 0 | 0 | 0 | 0 | 0 | 0 | 0 | 0 | 0 | 0 | 0 | 0 | 0 | 0 |
| 54.1000 | -2.0440  | 11.3220 | N | 0 | 0 | 3 | 0 | 0 | 0 | 0 | 0 | 0 | 0 | 0 | 0 | 0 | 0 |
| 56.2690 | -15.2180 | 16.4810 | C | 0 | 0 | 0 | 0 | 0 | 0 | 0 | 0 | 0 | 0 | 0 | 0 | 0 | 0 |
| 55.9200 | -15.4740 | 15.4730 | H | 0 | 0 | 0 | 0 | 0 | 0 | 0 | 0 | 0 | 0 | 0 | 0 | 0 | 0 |
| 55.8860 | -14.2120 | 16.6830 | H | 0 | 0 | 0 | 0 | 0 | 0 | 0 | 0 | 0 | 0 | 0 | 0 | 0 | 0 |
| 55.7010 | -16.0830 | 17.4770 | O | 0 | 0 | 0 | 0 | 0 | 0 | 0 | 0 | 0 | 0 | 0 | 0 | 0 | 0 |
| 55.5360 | -17.3870 | 17.1130 | C | 0 | 0 | 0 | 0 | 0 | 0 | 0 | 0 | 0 | 0 | 0 | 0 | 0 | 0 |
| 54.9170 | -18.1560 | 18.2520 | C | 0 | 0 | 0 | 0 | 0 | 0 | 0 | 0 | 0 | 0 | 0 | 0 | 0 | 0 |
| 54.9260 | -17.5510 | 19.1650 | H | 0 | 0 | 0 | 0 | 0 | 0 | 0 | 0 | 0 | 0 | 0 | 0 | 0 | 0 |
| 53.8610 | -18.2970 | 17.9910 | H | 0 | 0 | 0 | 0 | 0 | 0 | 0 | 0 | 0 | 0 | 0 | 0 | 0 | 0 |
| 55.5680 | -19.5220 | 18.4910 | C | 0 | 0 | 0 | 0 | 0 | 0 | 0 | 0 | 0 | 0 | 0 | 0 | 0 | 0 |
| 55.6360 | -20.0770 | 17.5490 | H | 0 | 0 | 0 | 0 | 0 | 0 | 0 | 0 | 0 | 0 | 0 | 0 | 0 | 0 |
| 54.8570 | -20.1130 | 19.0860 | H | 0 | 0 | 0 | 0 | 0 | 0 | 0 | 0 | 0 | 0 | 0 | 0 | 0 | 0 |
| 55.8250 | -17.8630 | 16.0250 | O | 0 | 0 | 0 | 0 | 0 | 0 | 0 | 0 | 0 | 0 | 0 | 0 | 0 | 0 |
| 58.5890 | -5.2130  | 14.0240 | C | 0 | 0 | 0 | 0 | 0 | 0 | 0 | 0 | 0 | 0 | 0 | 0 | 0 | 0 |
| 59.1720 | -4.3770  | 14.4280 | H | 0 | 0 | 0 | 0 | 0 | 0 | 0 | 0 | 0 | 0 | 0 | 0 | 0 | 0 |
| 58.5280 | -5.9510  | 14.8310 | H | 0 | 0 | 0 | 0 | 0 | 0 | 0 | 0 | 0 | 0 | 0 | 0 | 0 | 0 |
| 55.4980 | -2.2050  | 11.7790 | C | 0 | 0 | 0 | 0 | 0 | 0 | 0 | 0 | 0 | 0 | 0 | 0 | 0 | 0 |

|         |          |         |   |   |   |   |   |   |   |   |   |   |   |   |   |   |
|---------|----------|---------|---|---|---|---|---|---|---|---|---|---|---|---|---|---|
| 56.1380 | -2.4300  | 10.9150 | H | 0 | 0 | 0 | 0 | 0 | 0 | 0 | 0 | 0 | 0 | 0 | 0 | 0 |
| 55.8790 | -1.2700  | 12.2100 | H | 0 | 0 | 0 | 0 | 0 | 0 | 0 | 0 | 0 | 0 | 0 | 0 | 0 |
| 55.6570 | -3.3660  | 12.7670 | C | 0 | 0 | 0 | 0 | 0 | 0 | 0 | 0 | 0 | 0 | 0 | 0 | 0 |
| 55.1430 | -3.1660  | 13.7120 | H | 0 | 0 | 0 | 0 | 0 | 0 | 0 | 0 | 0 | 0 | 0 | 0 | 0 |
| 55.2430 | -4.2790  | 12.3220 | H | 0 | 0 | 0 | 0 | 0 | 0 | 0 | 0 | 0 | 0 | 0 | 0 | 0 |
| 57.1140 | -3.6140  | 13.0770 | C | 0 | 0 | 0 | 0 | 0 | 0 | 0 | 0 | 0 | 0 | 0 | 0 | 0 |
| 57.2460 | -4.8120  | 13.7150 | O | 0 | 0 | 0 | 0 | 0 | 0 | 0 | 0 | 0 | 0 | 0 | 0 | 0 |
| 58.0330 | -2.8560  | 12.7990 | O | 0 | 0 | 0 | 0 | 0 | 0 | 0 | 0 | 0 | 0 | 0 | 0 | 0 |
| 59.2600 | -5.8220  | 12.7980 | C | 0 | 0 | 0 | 0 | 0 | 0 | 0 | 0 | 0 | 0 | 0 | 0 | 0 |
| 58.6000 | -6.5550  | 12.3170 | H | 0 | 0 | 0 | 0 | 0 | 0 | 0 | 0 | 0 | 0 | 0 | 0 | 0 |
| 59.4450 | -5.0440  | 12.0500 | H | 0 | 0 | 0 | 0 | 0 | 0 | 0 | 0 | 0 | 0 | 0 | 0 | 0 |
| 60.5210 | -6.3750  | 13.1620 | O | 0 | 0 | 0 | 0 | 0 | 0 | 0 | 0 | 0 | 0 | 0 | 0 | 0 |
| 60.6030 | -7.7890  | 12.9780 | C | 0 | 0 | 0 | 0 | 0 | 0 | 0 | 0 | 0 | 0 | 0 | 0 | 0 |
| 60.2790 | -8.0550  | 11.9650 | H | 0 | 0 | 0 | 0 | 0 | 0 | 0 | 0 | 0 | 0 | 0 | 0 | 0 |
| 61.6630 | -8.0570  | 13.0590 | H | 0 | 0 | 0 | 0 | 0 | 0 | 0 | 0 | 0 | 0 | 0 | 0 | 0 |
| 59.8080 | -8.5420  | 14.0450 | C | 0 | 0 | 0 | 0 | 0 | 0 | 0 | 0 | 0 | 0 | 0 | 0 | 0 |
| 60.1610 | -8.2380  | 15.0380 | H | 0 | 0 | 0 | 0 | 0 | 0 | 0 | 0 | 0 | 0 | 0 | 0 | 0 |
| 58.7520 | -8.2520  | 13.9990 | H | 0 | 0 | 0 | 0 | 0 | 0 | 0 | 0 | 0 | 0 | 0 | 0 | 0 |
| 59.9230 | -10.0570 | 13.8810 | C | 0 | 0 | 0 | 0 | 0 | 0 | 0 | 0 | 0 | 0 | 0 | 0 | 0 |
| 59.5620 | -10.3460 | 12.8870 | H | 0 | 0 | 0 | 0 | 0 | 0 | 0 | 0 | 0 | 0 | 0 | 0 | 0 |
| 60.9750 | -10.3590 | 13.9460 | H | 0 | 0 | 0 | 0 | 0 | 0 | 0 | 0 | 0 | 0 | 0 | 0 | 0 |
| 59.1120 | -10.7880 | 14.9540 | C | 0 | 0 | 0 | 0 | 0 | 0 | 0 | 0 | 0 | 0 | 0 | 0 | 0 |
| 59.5020 | -10.5310 | 15.9460 | H | 0 | 0 | 0 | 0 | 0 | 0 | 0 | 0 | 0 | 0 | 0 | 0 | 0 |
| 58.0690 | -10.4490 | 14.9200 | H | 0 | 0 | 0 | 0 | 0 | 0 | 0 | 0 | 0 | 0 | 0 | 0 | 0 |
| 59.1570 | -12.3030 | 14.7610 | C | 0 | 0 | 0 | 0 | 0 | 0 | 0 | 0 | 0 | 0 | 0 | 0 | 0 |
| 58.7650 | -12.5700 | 13.7710 | H | 0 | 0 | 0 | 0 | 0 | 0 | 0 | 0 | 0 | 0 | 0 | 0 | 0 |
| 60.1950 | -12.6580 | 14.7790 | H | 0 | 0 | 0 | 0 | 0 | 0 | 0 | 0 | 0 | 0 | 0 | 0 | 0 |
| 58.3550 | -13.0300 | 15.8350 | C | 0 | 0 | 0 | 0 | 0 | 0 | 0 | 0 | 0 | 0 | 0 | 0 | 0 |
| 58.7840 | -12.8320 | 16.8240 | H | 0 | 0 | 0 | 0 | 0 | 0 | 0 | 0 | 0 | 0 | 0 | 0 | 0 |
| 57.3150 | -12.6870 | 15.8200 | H | 0 | 0 | 0 | 0 | 0 | 0 | 0 | 0 | 0 | 0 | 0 | 0 | 0 |
| 58.4050 | -14.4290 | 15.5590 | O | 0 | 0 | 0 | 0 | 0 | 0 | 0 | 0 | 0 | 0 | 0 | 0 | 0 |
| 57.7920 | -15.2340 | 16.5630 | C | 0 | 0 | 0 | 0 | 0 | 0 | 0 | 0 | 0 | 0 | 0 | 0 | 0 |
| 58.1380 | -14.9410 | 17.5620 | H | 0 | 0 | 0 | 0 | 0 | 0 | 0 | 0 | 0 | 0 | 0 | 0 | 0 |
| 58.1490 | -16.2570 | 16.4110 | H | 0 | 0 | 0 | 0 | 0 | 0 | 0 | 0 | 0 | 0 | 0 | 0 | 0 |
| 62.3400 | -19.7960 | 12.4070 | O | 0 | 0 | 0 | 0 | 0 | 0 | 0 | 0 | 0 | 0 | 0 | 0 | 0 |
| 62.5000 | -20.3310 | 11.6100 | H | 0 | 0 | 0 | 0 | 0 | 0 | 0 | 0 | 0 | 0 | 0 | 0 | 0 |
| 61.2500 | -20.3930 | 13.0970 | C | 0 | 0 | 0 | 0 | 0 | 0 | 0 | 0 | 0 | 0 | 0 | 0 | 0 |
| 60.3710 | -20.3650 | 12.4460 | H | 0 | 0 | 0 | 0 | 0 | 0 | 0 | 0 | 0 | 0 | 0 | 0 | 0 |
| 61.5020 | -21.4370 | 13.3100 | H | 0 | 0 | 0 | 0 | 0 | 0 | 0 | 0 | 0 | 0 | 0 | 0 | 0 |
| 60.9980 | -19.6230 | 14.3870 | C | 0 | 0 | 0 | 0 | 0 | 0 | 0 | 0 | 0 | 0 | 0 | 0 | 0 |
| 61.9040 | -19.6430 | 15.0060 | H | 0 | 0 | 0 | 0 | 0 | 0 | 0 | 0 | 0 | 0 | 0 | 0 | 0 |
| 60.8210 | -18.5660 | 14.1490 | H | 0 | 0 | 0 | 0 | 0 | 0 | 0 | 0 | 0 | 0 | 0 | 0 | 0 |
| 59.8130 | -20.1940 | 15.1640 | C | 0 | 0 | 0 | 0 | 0 | 0 | 0 | 0 | 0 | 0 | 0 | 0 | 0 |
| 58.9180 | -20.1690 | 14.5300 | H | 0 | 0 | 0 | 0 | 0 | 0 | 0 | 0 | 0 | 0 | 0 | 0 | 0 |
| 60.0040 | -21.2450 | 15.4110 | H | 0 | 0 | 0 | 0 | 0 | 0 | 0 | 0 | 0 | 0 | 0 | 0 | 0 |
| 59.5520 | -19.4050 | 16.4490 | C | 0 | 0 | 0 | 0 | 0 | 0 | 0 | 0 | 0 | 0 | 0 | 0 | 0 |
| 60.4280 | -19.4680 | 17.1060 | H | 0 | 0 | 0 | 0 | 0 | 0 | 0 | 0 | 0 | 0 | 0 | 0 | 0 |
| 59.4080 | -18.3460 | 16.2030 | H | 0 | 0 | 0 | 0 | 0 | 0 | 0 | 0 | 0 | 0 | 0 | 0 | 0 |
| 58.3140 | -19.9300 | 17.1860 | C | 0 | 0 | 0 | 0 | 0 | 0 | 0 | 0 | 0 | 0 | 0 | 0 | 0 |
| 57.4700 | -19.9130 | 16.4900 | H | 0 | 0 | 0 | 0 | 0 | 0 | 0 | 0 | 0 | 0 | 0 | 0 | 0 |
| 58.4750 | -20.9760 | 17.4740 | H | 0 | 0 | 0 | 0 | 0 | 0 | 0 | 0 | 0 | 0 | 0 | 0 | 0 |
| 58.0110 | -19.0910 | 18.4380 | C | 0 | 0 | 0 | 0 | 0 | 0 | 0 | 0 | 0 | 0 | 0 | 0 | 0 |
| 58.9110 | -19.1340 | 19.0610 | H | 0 | 0 | 0 | 0 | 0 | 0 | 0 | 0 | 0 | 0 | 0 | 0 | 0 |
| 57.8870 | -18.0370 | 18.1680 | H | 0 | 0 | 0 | 0 | 0 | 0 | 0 | 0 | 0 | 0 | 0 | 0 | 0 |
| 56.8550 | -19.5730 | 19.2130 | N | 0 | 0 | 3 | 0 | 0 | 0 | 0 | 0 | 0 | 0 | 0 | 0 | 0 |
| 67.8470 | -14.8620 | 26.9870 | C | 0 | 0 | 0 | 0 | 0 | 0 | 0 | 0 | 0 | 0 | 0 | 0 | 0 |
| 67.3760 | -13.8850 | 27.1500 | H | 0 | 0 | 0 | 0 | 0 | 0 | 0 | 0 | 0 | 0 | 0 | 0 | 0 |
| 67.0830 | -15.4880 | 26.5150 | H | 0 | 0 | 0 | 0 | 0 | 0 | 0 | 0 | 0 | 0 | 0 | 0 | 0 |
| 68.9350 | -14.7710 | 26.0540 | O | 0 | 0 | 0 | 0 | 0 | 0 | 0 | 0 | 0 | 0 | 0 | 0 | 0 |
| 69.7320 | -13.6700 | 26.1690 | C | 0 | 0 | 0 | 0 | 0 | 0 | 0 | 0 | 0 | 0 | 0 | 0 | 0 |
| 70.8050 | -13.7210 | 25.1090 | C | 0 | 0 | 0 | 0 | 0 | 0 | 0 | 0 | 0 | 0 | 0 | 0 | 0 |
| 71.3860 | -14.6390 | 25.2470 | H | 0 | 0 | 0 | 0 | 0 | 0 | 0 | 0 | 0 | 0 | 0 | 0 | 0 |
| 70.3210 | -13.7460 | 24.1270 | H | 0 | 0 | 0 | 0 | 0 | 0 | 0 | 0 | 0 | 0 | 0 | 0 | 0 |
| 71.7360 | -12.5220 | 25.1810 | C | 0 | 0 | 0 | 0 | 0 | 0 | 0 | 0 | 0 | 0 | 0 | 0 | 0 |
| 71.1840 | -11.5870 | 25.0420 | H | 0 | 0 | 0 | 0 | 0 | 0 | 0 | 0 | 0 | 0 | 0 | 0 | 0 |
| 72.5010 | -12.5870 | 24.4010 | H | 0 | 0 | 0 | 0 | 0 | 0 | 0 | 0 | 0 | 0 | 0 | 0 | 0 |
| 72.2390 | -12.4730 | 26.1520 | H | 0 | 0 | 0 | 0 | 0 | 0 | 0 | 0 | 0 | 0 | 0 | 0 | 0 |
| 69.5990 | -12.7860 | 27.0030 | O | 0 | 0 | 0 | 0 | 0 | 0 | 0 | 0 | 0 | 0 | 0 | 0 | 0 |
| 58.2080 | -19.1400 | 25.1650 | C | 0 | 0 | 0 | 0 | 0 | 0 | 0 | 0 | 0 | 0 | 0 | 0 | 0 |
| 57.2110 | -18.7510 | 25.4070 | H | 0 | 0 | 0 | 0 | 0 | 0 | 0 | 0 | 0 | 0 | 0 | 0 | 0 |
| 58.3640 | -19.9970 | 25.8310 | H | 0 | 0 | 0 | 0 | 0 | 0 | 0 | 0 | 0 | 0 | 0 | 0 | 0 |
| 56.7700 | -18.9290 | 20.5360 | C | 0 | 0 | 0 | 0 | 0 | 0 | 0 | 0 | 0 | 0 | 0 | 0 | 0 |
| 56.8980 | -17.8420 | 20.4500 | H | 0 | 0 | 0 | 0 | 0 | 0 | 0 | 0 | 0 | 0 | 0 | 0 | 0 |
| 55.7700 | -19.0900 | 20.9630 | H | 0 | 0 | 0 | 0 | 0 | 0 | 0 | 0 | 0 | 0 | 0 | 0 | 0 |
| 57.7780 | -19.5150 | 21.5270 | C | 0 | 0 | 0 | 0 | 0 | 0 | 0 | 0 | 0 | 0 | 0 | 0 | 0 |
| 57.6120 | -20.5940 | 21.6210 | H | 0 | 0 | 0 | 0 | 0 | 0 | 0 | 0 | 0 | 0 | 0 | 0 | 0 |
| 58.8100 | -19.3390 | 21.2100 | H | 0 | 0 | 0 | 0 | 0 | 0 | 0 | 0 | 0 | 0 | 0 | 0 | 0 |
| 57.6110 | -18.8820 | 22.8840 | C | 0 | 0 | 0 | 0 | 0 | 0 | 0 | 0 | 0 | 0 | 0 | 0 | 0 |
| 58.2680 | -19.6280 | 23.8160 | O | 0 | 0 | 0 | 0 | 0 | 0 | 0 | 0 | 0 | 0 | 0 | 0 | 0 |
| 57.0070 | -17.8420 | 23.1070 | O | 0 | 0 | 0 | 0 | 0 | 0 | 0 | 0 | 0 | 0 | 0 | 0 | 0 |
| 59.2910 | -18.0960 | 25.4090 | C | 0 | 0 | 0 | 0 | 0 | 0 | 0 | 0 | 0 | 0 | 0 | 0 | 0 |

|         |          |         |   |   |   |   |   |   |   |   |   |   |   |   |   |   |   |
|---------|----------|---------|---|---|---|---|---|---|---|---|---|---|---|---|---|---|---|
| 60.2720 | -18.5290 | 25.1860 | H | 0 | 0 | 0 | 0 | 0 | 0 | 0 | 0 | 0 | 0 | 0 | 0 | 0 | 0 |
| 59.1470 | -17.2380 | 24.7430 | H | 0 | 0 | 0 | 0 | 0 | 0 | 0 | 0 | 0 | 0 | 0 | 0 | 0 | 0 |
| 59.2230 | -17.6700 | 26.7670 | O | 0 | 0 | 0 | 0 | 0 | 0 | 0 | 0 | 0 | 0 | 0 | 0 | 0 | 0 |
| 60.2070 | -16.6910 | 27.0980 | C | 0 | 0 | 0 | 0 | 0 | 0 | 0 | 0 | 0 | 0 | 0 | 0 | 0 | 0 |
| 60.3260 | -15.9680 | 26.2820 | H | 0 | 0 | 0 | 0 | 0 | 0 | 0 | 0 | 0 | 0 | 0 | 0 | 0 | 0 |
| 59.8260 | -16.1430 | 27.9660 | H | 0 | 0 | 0 | 0 | 0 | 0 | 0 | 0 | 0 | 0 | 0 | 0 | 0 | 0 |
| 61.5340 | -17.3540 | 27.4630 | C | 0 | 0 | 0 | 0 | 0 | 0 | 0 | 0 | 0 | 0 | 0 | 0 | 0 | 0 |
| 61.3640 | -18.0890 | 28.2600 | H | 0 | 0 | 0 | 0 | 0 | 0 | 0 | 0 | 0 | 0 | 0 | 0 | 0 | 0 |
| 61.9170 | -17.9220 | 26.6080 | H | 0 | 0 | 0 | 0 | 0 | 0 | 0 | 0 | 0 | 0 | 0 | 0 | 0 | 0 |
| 62.5720 | -16.3240 | 27.9050 | C | 0 | 0 | 0 | 0 | 0 | 0 | 0 | 0 | 0 | 0 | 0 | 0 | 0 | 0 |
| 62.7290 | -15.5960 | 27.0990 | H | 0 | 0 | 0 | 0 | 0 | 0 | 0 | 0 | 0 | 0 | 0 | 0 | 0 | 0 |
| 62.1970 | -15.7700 | 28.7740 | H | 0 | 0 | 0 | 0 | 0 | 0 | 0 | 0 | 0 | 0 | 0 | 0 | 0 | 0 |
| 63.9030 | -16.9910 | 28.2580 | C | 0 | 0 | 0 | 0 | 0 | 0 | 0 | 0 | 0 | 0 | 0 | 0 | 0 | 0 |
| 63.7550 | -17.6990 | 29.0820 | H | 0 | 0 | 0 | 0 | 0 | 0 | 0 | 0 | 0 | 0 | 0 | 0 | 0 | 0 |
| 64.2620 | -17.5680 | 27.3970 | H | 0 | 0 | 0 | 0 | 0 | 0 | 0 | 0 | 0 | 0 | 0 | 0 | 0 | 0 |
| 64.9550 | -15.9560 | 28.6510 | C | 0 | 0 | 0 | 0 | 0 | 0 | 0 | 0 | 0 | 0 | 0 | 0 | 0 | 0 |
| 65.0780 | -15.2220 | 27.8470 | H | 0 | 0 | 0 | 0 | 0 | 0 | 0 | 0 | 0 | 0 | 0 | 0 | 0 | 0 |
| 64.6190 | -15.3840 | 29.5250 | H | 0 | 0 | 0 | 0 | 0 | 0 | 0 | 0 | 0 | 0 | 0 | 0 | 0 | 0 |
| 66.2990 | -16.6090 | 28.9640 | C | 0 | 0 | 0 | 0 | 0 | 0 | 0 | 0 | 0 | 0 | 0 | 0 | 0 | 0 |
| 66.2030 | -17.2360 | 29.8570 | H | 0 | 0 | 0 | 0 | 0 | 0 | 0 | 0 | 0 | 0 | 0 | 0 | 0 | 0 |
| 66.6290 | -17.2550 | 28.1430 | H | 0 | 0 | 0 | 0 | 0 | 0 | 0 | 0 | 0 | 0 | 0 | 0 | 0 | 0 |
| 67.2560 | -15.5920 | 29.2600 | O | 0 | 0 | 0 | 0 | 0 | 0 | 0 | 0 | 0 | 0 | 0 | 0 | 0 | 0 |
| 68.3080 | -15.4850 | 28.3020 | C | 0 | 0 | 0 | 0 | 0 | 0 | 0 | 0 | 0 | 0 | 0 | 0 | 0 | 0 |
| 68.7750 | -16.4640 | 28.1350 | H | 0 | 0 | 0 | 0 | 0 | 0 | 0 | 0 | 0 | 0 | 0 | 0 | 0 | 0 |
| 69.0860 | -14.8580 | 28.7500 | H | 0 | 0 | 0 | 0 | 0 | 0 | 0 | 0 | 0 | 0 | 0 | 0 | 0 | 0 |
| 1       | 2        | 1       | 0 | 0 | 0 | 0 | 0 | 0 | 0 | 0 | 0 | 0 | 0 | 0 | 0 | 0 | 0 |
| 1       | 3        | 1       | 0 | 0 | 0 | 0 | 0 | 0 | 0 | 0 | 0 | 0 | 0 | 0 | 0 | 0 | 0 |
| 3       | 4        | 1       | 0 | 0 | 0 | 0 | 0 | 0 | 0 | 0 | 0 | 0 | 0 | 0 | 0 | 0 | 0 |
| 3       | 5        | 1       | 0 | 0 | 0 | 0 | 0 | 0 | 0 | 0 | 0 | 0 | 0 | 0 | 0 | 0 | 0 |
| 3       | 6        | 1       | 0 | 0 | 0 | 0 | 0 | 0 | 0 | 0 | 0 | 0 | 0 | 0 | 0 | 0 | 0 |
| 6       | 7        | 1       | 0 | 0 | 0 | 0 | 0 | 0 | 0 | 0 | 0 | 0 | 0 | 0 | 0 | 0 | 0 |
| 6       | 8        | 1       | 0 | 0 | 0 | 0 | 0 | 0 | 0 | 0 | 0 | 0 | 0 | 0 | 0 | 0 | 0 |
| 6       | 9        | 1       | 0 | 0 | 0 | 0 | 0 | 0 | 0 | 0 | 0 | 0 | 0 | 0 | 0 | 0 | 0 |
| 9       | 10       | 1       | 0 | 0 | 0 | 0 | 0 | 0 | 0 | 0 | 0 | 0 | 0 | 0 | 0 | 0 | 0 |
| 9       | 11       | 1       | 0 | 0 | 0 | 0 | 0 | 0 | 0 | 0 | 0 | 0 | 0 | 0 | 0 | 0 | 0 |
| 9       | 12       | 1       | 0 | 0 | 0 | 0 | 0 | 0 | 0 | 0 | 0 | 0 | 0 | 0 | 0 | 0 | 0 |
| 12      | 13       | 1       | 0 | 0 | 0 | 0 | 0 | 0 | 0 | 0 | 0 | 0 | 0 | 0 | 0 | 0 | 0 |
| 12      | 14       | 1       | 0 | 0 | 0 | 0 | 0 | 0 | 0 | 0 | 0 | 0 | 0 | 0 | 0 | 0 | 0 |
| 12      | 15       | 1       | 0 | 0 | 0 | 0 | 0 | 0 | 0 | 0 | 0 | 0 | 0 | 0 | 0 | 0 | 0 |
| 15      | 16       | 1       | 0 | 0 | 0 | 0 | 0 | 0 | 0 | 0 | 0 | 0 | 0 | 0 | 0 | 0 | 0 |
| 15      | 17       | 1       | 0 | 0 | 0 | 0 | 0 | 0 | 0 | 0 | 0 | 0 | 0 | 0 | 0 | 0 | 0 |
| 15      | 18       | 1       | 0 | 0 | 0 | 0 | 0 | 0 | 0 | 0 | 0 | 0 | 0 | 0 | 0 | 0 | 0 |
| 18      | 19       | 1       | 0 | 0 | 0 | 0 | 0 | 0 | 0 | 0 | 0 | 0 | 0 | 0 | 0 | 0 | 0 |
| 18      | 20       | 1       | 0 | 0 | 0 | 0 | 0 | 0 | 0 | 0 | 0 | 0 | 0 | 0 | 0 | 0 | 0 |
| 18      | 21       | 1       | 0 | 0 | 0 | 0 | 0 | 0 | 0 | 0 | 0 | 0 | 0 | 0 | 0 | 0 | 0 |
| 21      | 22       | 1       | 0 | 0 | 0 | 0 | 0 | 0 | 0 | 0 | 0 | 0 | 0 | 0 | 0 | 0 | 0 |
| 21      | 38       | 1       | 0 | 0 | 0 | 0 | 0 | 0 | 0 | 0 | 0 | 0 | 0 | 0 | 0 | 0 | 0 |
| 23      | 24       | 1       | 0 | 0 | 0 | 0 | 0 | 0 | 0 | 0 | 0 | 0 | 0 | 0 | 0 | 0 | 0 |
| 23      | 25       | 1       | 0 | 0 | 0 | 0 | 0 | 0 | 0 | 0 | 0 | 0 | 0 | 0 | 0 | 0 | 0 |
| 23      | 26       | 1       | 0 | 0 | 0 | 0 | 0 | 0 | 0 | 0 | 0 | 0 | 0 | 0 | 0 | 0 | 0 |
| 23      | 70       | 1       | 0 | 0 | 0 | 0 | 0 | 0 | 0 | 0 | 0 | 0 | 0 | 0 | 0 | 0 | 0 |
| 26      | 27       | 1       | 0 | 0 | 0 | 0 | 0 | 0 | 0 | 0 | 0 | 0 | 0 | 0 | 0 | 0 | 0 |
| 27      | 28       | 1       | 0 | 0 | 0 | 0 | 0 | 0 | 0 | 0 | 0 | 0 | 0 | 0 | 0 | 0 | 0 |
| 27      | 34       | 2       | 0 | 0 | 0 | 0 | 0 | 0 | 0 | 0 | 0 | 0 | 0 | 0 | 0 | 0 | 0 |
| 28      | 29       | 1       | 0 | 0 | 0 | 0 | 0 | 0 | 0 | 0 | 0 | 0 | 0 | 0 | 0 | 0 | 0 |
| 28      | 30       | 1       | 0 | 0 | 0 | 0 | 0 | 0 | 0 | 0 | 0 | 0 | 0 | 0 | 0 | 0 | 0 |
| 28      | 31       | 1       | 0 | 0 | 0 | 0 | 0 | 0 | 0 | 0 | 0 | 0 | 0 | 0 | 0 | 0 | 0 |
| 31      | 32       | 1       | 0 | 0 | 0 | 0 | 0 | 0 | 0 | 0 | 0 | 0 | 0 | 0 | 0 | 0 | 0 |
| 31      | 33       | 1       | 0 | 0 | 0 | 0 | 0 | 0 | 0 | 0 | 0 | 0 | 0 | 0 | 0 | 0 | 0 |
| 31      | 93       | 1       | 0 | 0 | 0 | 0 | 0 | 0 | 0 | 0 | 0 | 0 | 0 | 0 | 0 | 0 | 0 |
| 35      | 36       | 1       | 0 | 0 | 0 | 0 | 0 | 0 | 0 | 0 | 0 | 0 | 0 | 0 | 0 | 0 | 0 |
| 35      | 37       | 1       | 0 | 0 | 0 | 0 | 0 | 0 | 0 | 0 | 0 | 0 | 0 | 0 | 0 | 0 | 0 |
| 35      | 45       | 1       | 0 | 0 | 0 | 0 | 0 | 0 | 0 | 0 | 0 | 0 | 0 | 0 | 0 | 0 | 0 |
| 35      | 47       | 1       | 0 | 0 | 0 | 0 | 0 | 0 | 0 | 0 | 0 | 0 | 0 | 0 | 0 | 0 | 0 |
| 38      | 39       | 1       | 0 | 0 | 0 | 0 | 0 | 0 | 0 | 0 | 0 | 0 | 0 | 0 | 0 | 0 | 0 |
| 38      | 40       | 1       | 0 | 0 | 0 | 0 | 0 | 0 | 0 | 0 | 0 | 0 | 0 | 0 | 0 | 0 | 0 |
| 38      | 41       | 1       | 0 | 0 | 0 | 0 | 0 | 0 | 0 | 0 | 0 | 0 | 0 | 0 | 0 | 0 | 0 |
| 41      | 42       | 1       | 0 | 0 | 0 | 0 | 0 | 0 | 0 | 0 | 0 | 0 | 0 | 0 | 0 | 0 | 0 |
| 41      | 43       | 1       | 0 | 0 | 0 | 0 | 0 | 0 | 0 | 0 | 0 | 0 | 0 | 0 | 0 | 0 | 0 |
| 41      | 44       | 1       | 0 | 0 | 0 | 0 | 0 | 0 | 0 | 0 | 0 | 0 | 0 | 0 | 0 | 0 | 0 |
| 44      | 45       | 1       | 0 | 0 | 0 | 0 | 0 | 0 | 0 | 0 | 0 | 0 | 0 | 0 | 0 | 0 | 0 |
| 44      | 46       | 2       | 0 | 0 | 0 | 0 | 0 | 0 | 0 | 0 | 0 | 0 | 0 | 0 | 0 | 0 | 0 |
| 47      | 48       | 1       | 0 | 0 | 0 | 0 | 0 | 0 | 0 | 0 | 0 | 0 | 0 | 0 | 0 | 0 | 0 |
| 47      | 49       | 1       | 0 | 0 | 0 | 0 | 0 | 0 | 0 | 0 | 0 | 0 | 0 | 0 | 0 | 0 | 0 |
| 47      | 50       | 1       | 0 | 0 | 0 | 0 | 0 | 0 | 0 | 0 | 0 | 0 | 0 | 0 | 0 | 0 | 0 |
| 50      | 51       | 1       | 0 | 0 | 0 | 0 | 0 | 0 | 0 | 0 | 0 | 0 | 0 | 0 | 0 | 0 | 0 |
| 51      | 52       | 1       | 0 | 0 | 0 | 0 | 0 | 0 | 0 | 0 | 0 | 0 | 0 | 0 | 0 | 0 | 0 |
| 51      | 53       | 1       | 0 | 0 | 0 | 0 | 0 | 0 | 0 | 0 | 0 | 0 | 0 | 0 | 0 | 0 | 0 |
| 51      | 54       | 1       | 0 | 0 | 0 | 0 | 0 | 0 | 0 | 0 | 0 | 0 | 0 | 0 | 0 | 0 | 0 |
| 54      | 55       | 1       | 0 | 0 | 0 | 0 | 0 | 0 | 0 | 0 | 0 | 0 | 0 | 0 | 0 | 0 | 0 |
| 54      | 56       | 1       | 0 | 0 | 0 | 0 | 0 | 0 | 0 | 0 | 0 | 0 | 0 | 0 | 0 | 0 | 0 |



|     |     |   |   |   |   |   |
|-----|-----|---|---|---|---|---|
| 54  | 57  | 1 | 0 | 0 | 0 | 0 |
| 57  | 58  | 1 | 0 | 0 | 0 | 0 |
| 57  | 59  | 1 | 0 | 0 | 0 | 0 |
| 57  | 60  | 1 | 0 | 0 | 0 | 0 |
| 60  | 61  | 1 | 0 | 0 | 0 | 0 |
| 60  | 62  | 1 | 0 | 0 | 0 | 0 |
| 60  | 63  | 1 | 0 | 0 | 0 | 0 |
| 63  | 64  | 1 | 0 | 0 | 0 | 0 |
| 63  | 65  | 1 | 0 | 0 | 0 | 0 |
| 63  | 66  | 1 | 0 | 0 | 0 | 0 |
| 66  | 67  | 1 | 0 | 0 | 0 | 0 |
| 66  | 68  | 1 | 0 | 0 | 0 | 0 |
| 66  | 69  | 1 | 0 | 0 | 0 | 0 |
| 69  | 70  | 1 | 0 | 0 | 0 | 0 |
| 70  | 71  | 1 | 0 | 0 | 0 | 0 |
| 70  | 72  | 1 | 0 | 0 | 0 | 0 |
| 73  | 74  | 1 | 0 | 0 | 0 | 0 |
| 73  | 75  | 1 | 0 | 0 | 0 | 0 |
| 75  | 76  | 1 | 0 | 0 | 0 | 0 |
| 75  | 77  | 1 | 0 | 0 | 0 | 0 |
| 75  | 78  | 1 | 0 | 0 | 0 | 0 |
| 78  | 79  | 1 | 0 | 0 | 0 | 0 |
| 78  | 80  | 1 | 0 | 0 | 0 | 0 |
| 78  | 81  | 1 | 0 | 0 | 0 | 0 |
| 81  | 82  | 1 | 0 | 0 | 0 | 0 |
| 81  | 83  | 1 | 0 | 0 | 0 | 0 |
| 81  | 84  | 1 | 0 | 0 | 0 | 0 |
| 84  | 85  | 1 | 0 | 0 | 0 | 0 |
| 84  | 86  | 1 | 0 | 0 | 0 | 0 |
| 84  | 87  | 1 | 0 | 0 | 0 | 0 |
| 87  | 88  | 1 | 0 | 0 | 0 | 0 |
| 87  | 89  | 1 | 0 | 0 | 0 | 0 |
| 87  | 90  | 1 | 0 | 0 | 0 | 0 |
| 90  | 91  | 1 | 0 | 0 | 0 | 0 |
| 90  | 92  | 1 | 0 | 0 | 0 | 0 |
| 90  | 93  | 1 | 0 | 0 | 0 | 0 |
| 93  | 109 | 1 | 0 | 0 | 0 | 0 |
| 94  | 95  | 1 | 0 | 0 | 0 | 0 |
| 94  | 96  | 1 | 0 | 0 | 0 | 0 |
| 94  | 97  | 1 | 0 | 0 | 0 | 0 |
| 94  | 141 | 1 | 0 | 0 | 0 | 0 |
| 97  | 98  | 1 | 0 | 0 | 0 | 0 |
| 98  | 99  | 1 | 0 | 0 | 0 | 0 |
| 98  | 105 | 2 | 0 | 0 | 0 | 0 |
| 99  | 100 | 1 | 0 | 0 | 0 | 0 |
| 99  | 101 | 1 | 0 | 0 | 0 | 0 |
| 99  | 102 | 1 | 0 | 0 | 0 | 0 |
| 102 | 103 | 1 | 0 | 0 | 0 | 0 |
| 102 | 104 | 1 | 0 | 0 | 0 | 0 |
| 102 | 164 | 1 | 0 | 0 | 0 | 0 |
| 106 | 107 | 1 | 0 | 0 | 0 | 0 |
| 106 | 108 | 1 | 0 | 0 | 0 | 0 |
| 106 | 116 | 1 | 0 | 0 | 0 | 0 |
| 106 | 118 | 1 | 0 | 0 | 0 | 0 |
| 109 | 110 | 1 | 0 | 0 | 0 | 0 |
| 109 | 111 | 1 | 0 | 0 | 0 | 0 |
| 109 | 112 | 1 | 0 | 0 | 0 | 0 |
| 112 | 113 | 1 | 0 | 0 | 0 | 0 |
| 112 | 114 | 1 | 0 | 0 | 0 | 0 |
| 112 | 115 | 1 | 0 | 0 | 0 | 0 |
| 115 | 116 | 1 | 0 | 0 | 0 | 0 |
| 115 | 117 | 2 | 0 | 0 | 0 | 0 |
| 118 | 119 | 1 | 0 | 0 | 0 | 0 |
| 118 | 120 | 1 | 0 | 0 | 0 | 0 |
| 118 | 121 | 1 | 0 | 0 | 0 | 0 |
| 121 | 122 | 1 | 0 | 0 | 0 | 0 |
| 122 | 123 | 1 | 0 | 0 | 0 | 0 |
| 122 | 124 | 1 | 0 | 0 | 0 | 0 |
| 122 | 125 | 1 | 0 | 0 | 0 | 0 |
| 125 | 126 | 1 | 0 | 0 | 0 | 0 |
| 125 | 127 | 1 | 0 | 0 | 0 | 0 |
| 125 | 128 | 1 | 0 | 0 | 0 | 0 |
| 128 | 129 | 1 | 0 | 0 | 0 | 0 |
| 128 | 130 | 1 | 0 | 0 | 0 | 0 |
| 128 | 131 | 1 | 0 | 0 | 0 | 0 |
| 131 | 132 | 1 | 0 | 0 | 0 | 0 |
| 131 | 133 | 1 | 0 | 0 | 0 | 0 |
| 131 | 134 | 1 | 0 | 0 | 0 | 0 |
| 134 | 135 | 1 | 0 | 0 | 0 | 0 |
| 134 | 136 | 1 | 0 | 0 | 0 | 0 |
| 134 | 137 | 1 | 0 | 0 | 0 | 0 |

|        |   |   |   |   |   |
|--------|---|---|---|---|---|
| 137138 | 1 | 0 | 0 | 0 | 0 |
| 137139 | 1 | 0 | 0 | 0 | 0 |
| 137140 | 1 | 0 | 0 | 0 | 0 |
| 140141 | 1 | 0 | 0 | 0 | 0 |
| 141142 | 1 | 0 | 0 | 0 | 0 |
| 141143 | 1 | 0 | 0 | 0 | 0 |
| 144145 | 1 | 0 | 0 | 0 | 0 |
| 144146 | 1 | 0 | 0 | 0 | 0 |
| 146147 | 1 | 0 | 0 | 0 | 0 |
| 146148 | 1 | 0 | 0 | 0 | 0 |
| 146149 | 1 | 0 | 0 | 0 | 0 |
| 149150 | 1 | 0 | 0 | 0 | 0 |
| 149151 | 1 | 0 | 0 | 0 | 0 |
| 149152 | 1 | 0 | 0 | 0 | 0 |
| 152153 | 1 | 0 | 0 | 0 | 0 |
| 152154 | 1 | 0 | 0 | 0 | 0 |
| 152155 | 1 | 0 | 0 | 0 | 0 |
| 155156 | 1 | 0 | 0 | 0 | 0 |
| 155157 | 1 | 0 | 0 | 0 | 0 |
| 155158 | 1 | 0 | 0 | 0 | 0 |
| 158159 | 1 | 0 | 0 | 0 | 0 |
| 158160 | 1 | 0 | 0 | 0 | 0 |
| 158161 | 1 | 0 | 0 | 0 | 0 |
| 161162 | 1 | 0 | 0 | 0 | 0 |
| 161163 | 1 | 0 | 0 | 0 | 0 |
| 161164 | 1 | 0 | 0 | 0 | 0 |
| 164180 | 1 | 0 | 0 | 0 | 0 |
| 165166 | 1 | 0 | 0 | 0 | 0 |
| 165167 | 1 | 0 | 0 | 0 | 0 |
| 165168 | 1 | 0 | 0 | 0 | 0 |
| 165212 | 1 | 0 | 0 | 0 | 0 |
| 168169 | 1 | 0 | 0 | 0 | 0 |
| 169170 | 1 | 0 | 0 | 0 | 0 |
| 169176 | 2 | 0 | 0 | 0 | 0 |
| 170171 | 1 | 0 | 0 | 0 | 0 |
| 170172 | 1 | 0 | 0 | 0 | 0 |
| 170173 | 1 | 0 | 0 | 0 | 0 |
| 173174 | 1 | 0 | 0 | 0 | 0 |
| 173175 | 1 | 0 | 0 | 0 | 0 |
| 173235 | 1 | 0 | 0 | 0 | 0 |
| 177178 | 1 | 0 | 0 | 0 | 0 |
| 177179 | 1 | 0 | 0 | 0 | 0 |
| 177187 | 1 | 0 | 0 | 0 | 0 |
| 177189 | 1 | 0 | 0 | 0 | 0 |
| 180181 | 1 | 0 | 0 | 0 | 0 |
| 180182 | 1 | 0 | 0 | 0 | 0 |
| 180183 | 1 | 0 | 0 | 0 | 0 |
| 183184 | 1 | 0 | 0 | 0 | 0 |
| 183185 | 1 | 0 | 0 | 0 | 0 |
| 183186 | 1 | 0 | 0 | 0 | 0 |
| 186187 | 1 | 0 | 0 | 0 | 0 |
| 186188 | 2 | 0 | 0 | 0 | 0 |
| 189190 | 1 | 0 | 0 | 0 | 0 |
| 189191 | 1 | 0 | 0 | 0 | 0 |
| 189192 | 1 | 0 | 0 | 0 | 0 |
| 192193 | 1 | 0 | 0 | 0 | 0 |
| 193194 | 1 | 0 | 0 | 0 | 0 |
| 193195 | 1 | 0 | 0 | 0 | 0 |
| 193196 | 1 | 0 | 0 | 0 | 0 |
| 196197 | 1 | 0 | 0 | 0 | 0 |
| 196198 | 1 | 0 | 0 | 0 | 0 |
| 196199 | 1 | 0 | 0 | 0 | 0 |
| 199200 | 1 | 0 | 0 | 0 | 0 |
| 199201 | 1 | 0 | 0 | 0 | 0 |
| 199202 | 1 | 0 | 0 | 0 | 0 |
| 202203 | 1 | 0 | 0 | 0 | 0 |
| 202204 | 1 | 0 | 0 | 0 | 0 |
| 202205 | 1 | 0 | 0 | 0 | 0 |
| 205206 | 1 | 0 | 0 | 0 | 0 |
| 205207 | 1 | 0 | 0 | 0 | 0 |
| 205208 | 1 | 0 | 0 | 0 | 0 |
| 208209 | 1 | 0 | 0 | 0 | 0 |
| 208210 | 1 | 0 | 0 | 0 | 0 |
| 208211 | 1 | 0 | 0 | 0 | 0 |
| 211212 | 1 | 0 | 0 | 0 | 0 |
| 212213 | 1 | 0 | 0 | 0 | 0 |
| 212214 | 1 | 0 | 0 | 0 | 0 |
| 215216 | 1 | 0 | 0 | 0 | 0 |
| 215217 | 1 | 0 | 0 | 0 | 0 |
| 217218 | 1 | 0 | 0 | 0 | 0 |
| 217219 | 1 | 0 | 0 | 0 | 0 |

|        |   |   |   |   |   |
|--------|---|---|---|---|---|
| 217220 | 1 | 0 | 0 | 0 | 0 |
| 220221 | 1 | 0 | 0 | 0 | 0 |
| 220222 | 1 | 0 | 0 | 0 | 0 |
| 220223 | 1 | 0 | 0 | 0 | 0 |
| 223224 | 1 | 0 | 0 | 0 | 0 |
| 223225 | 1 | 0 | 0 | 0 | 0 |
| 223226 | 1 | 0 | 0 | 0 | 0 |
| 226227 | 1 | 0 | 0 | 0 | 0 |
| 226228 | 1 | 0 | 0 | 0 | 0 |
| 226229 | 1 | 0 | 0 | 0 | 0 |
| 229230 | 1 | 0 | 0 | 0 | 0 |
| 229231 | 1 | 0 | 0 | 0 | 0 |
| 229232 | 1 | 0 | 0 | 0 | 0 |
| 232233 | 1 | 0 | 0 | 0 | 0 |
| 232234 | 1 | 0 | 0 | 0 | 0 |
| 232235 | 1 | 0 | 0 | 0 | 0 |
| 235251 | 1 | 0 | 0 | 0 | 0 |
| 236237 | 1 | 0 | 0 | 0 | 0 |
| 236238 | 1 | 0 | 0 | 0 | 0 |
| 236239 | 1 | 0 | 0 | 0 | 0 |
| 236283 | 1 | 0 | 0 | 0 | 0 |
| 239240 | 1 | 0 | 0 | 0 | 0 |
| 240241 | 1 | 0 | 0 | 0 | 0 |
| 240247 | 2 | 0 | 0 | 0 | 0 |
| 241242 | 1 | 0 | 0 | 0 | 0 |
| 241243 | 1 | 0 | 0 | 0 | 0 |
| 241244 | 1 | 0 | 0 | 0 | 0 |
| 244245 | 1 | 0 | 0 | 0 | 0 |
| 244246 | 1 | 0 | 0 | 0 | 0 |
| 244306 | 1 | 0 | 0 | 0 | 0 |
| 248249 | 1 | 0 | 0 | 0 | 0 |
| 248250 | 1 | 0 | 0 | 0 | 0 |
| 248258 | 1 | 0 | 0 | 0 | 0 |
| 248260 | 1 | 0 | 0 | 0 | 0 |
| 251252 | 1 | 0 | 0 | 0 | 0 |
| 251253 | 1 | 0 | 0 | 0 | 0 |
| 251254 | 1 | 0 | 0 | 0 | 0 |
| 254255 | 1 | 0 | 0 | 0 | 0 |
| 254256 | 1 | 0 | 0 | 0 | 0 |
| 254257 | 1 | 0 | 0 | 0 | 0 |
| 257258 | 1 | 0 | 0 | 0 | 0 |
| 257259 | 2 | 0 | 0 | 0 | 0 |
| 260261 | 1 | 0 | 0 | 0 | 0 |
| 260262 | 1 | 0 | 0 | 0 | 0 |
| 260263 | 1 | 0 | 0 | 0 | 0 |
| 263264 | 1 | 0 | 0 | 0 | 0 |
| 264265 | 1 | 0 | 0 | 0 | 0 |
| 264266 | 1 | 0 | 0 | 0 | 0 |
| 264267 | 1 | 0 | 0 | 0 | 0 |
| 267268 | 1 | 0 | 0 | 0 | 0 |
| 267269 | 1 | 0 | 0 | 0 | 0 |
| 267270 | 1 | 0 | 0 | 0 | 0 |
| 270271 | 1 | 0 | 0 | 0 | 0 |
| 270272 | 1 | 0 | 0 | 0 | 0 |
| 270273 | 1 | 0 | 0 | 0 | 0 |
| 273274 | 1 | 0 | 0 | 0 | 0 |
| 273275 | 1 | 0 | 0 | 0 | 0 |
| 273276 | 1 | 0 | 0 | 0 | 0 |
| 276277 | 1 | 0 | 0 | 0 | 0 |
| 276278 | 1 | 0 | 0 | 0 | 0 |
| 276279 | 1 | 0 | 0 | 0 | 0 |
| 279280 | 1 | 0 | 0 | 0 | 0 |
| 279281 | 1 | 0 | 0 | 0 | 0 |
| 279282 | 1 | 0 | 0 | 0 | 0 |
| 282283 | 1 | 0 | 0 | 0 | 0 |
| 283284 | 1 | 0 | 0 | 0 | 0 |
| 283285 | 1 | 0 | 0 | 0 | 0 |
| 286287 | 1 | 0 | 0 | 0 | 0 |
| 286288 | 1 | 0 | 0 | 0 | 0 |
| 288289 | 1 | 0 | 0 | 0 | 0 |
| 288290 | 1 | 0 | 0 | 0 | 0 |
| 288291 | 1 | 0 | 0 | 0 | 0 |
| 291292 | 1 | 0 | 0 | 0 | 0 |
| 291293 | 1 | 0 | 0 | 0 | 0 |
| 291294 | 1 | 0 | 0 | 0 | 0 |
| 294295 | 1 | 0 | 0 | 0 | 0 |
| 294296 | 1 | 0 | 0 | 0 | 0 |
| 294297 | 1 | 0 | 0 | 0 | 0 |
| 297298 | 1 | 0 | 0 | 0 | 0 |
| 297299 | 1 | 0 | 0 | 0 | 0 |
| 297300 | 1 | 0 | 0 | 0 | 0 |

```

300301 1 0 0 0 0
300302 1 0 0 0 0
300303 1 0 0 0 0
303304 1 0 0 0 0
303305 1 0 0 0 0
303306 1 0 0 0 0
306323 1 0 0 0 0
307308 1 0 0 0 0
307309 1 0 0 0 0
307310 1 0 0 0 0
307355 1 0 0 0 0
310311 1 0 0 0 0
311312 1 0 0 0 0
311319 2 0 0 0 0
312313 1 0 0 0 0
312314 1 0 0 0 0
312315 1 0 0 0 0
315316 1 0 0 0 0
315317 1 0 0 0 0
315318 1 0 0 0 0
320321 1 0 0 0 0
320322 1 0 0 0 0
320330 1 0 0 0 0
320332 1 0 0 0 0
323324 1 0 0 0 0
323325 1 0 0 0 0
323326 1 0 0 0 0
326327 1 0 0 0 0
326328 1 0 0 0 0
326329 1 0 0 0 0
329330 1 0 0 0 0
329331 2 0 0 0 0
332333 1 0 0 0 0
332334 1 0 0 0 0
332335 1 0 0 0 0
335336 1 0 0 0 0
336337 1 0 0 0 0
336338 1 0 0 0 0
336339 1 0 0 0 0
339340 1 0 0 0 0
339341 1 0 0 0 0
339342 1 0 0 0 0
342343 1 0 0 0 0
342344 1 0 0 0 0
342345 1 0 0 0 0
345346 1 0 0 0 0
345347 1 0 0 0 0
345348 1 0 0 0 0
348349 1 0 0 0 0
348350 1 0 0 0 0
348351 1 0 0 0 0
351352 1 0 0 0 0
351353 1 0 0 0 0
351354 1 0 0 0 0
354355 1 0 0 0 0
355356 1 0 0 0 0
355357 1 0 0 0 0

```

```

M END
> <NAME>
U36_1

```

```

$$$$
U75_1
MOE2012 3D

```

```

362361 0 0 1 0 0 0 0 0 0999 V2000
43.4270 9.0650 -26.3390 C 0 0 0 0 0 0 0 0 0 0 0 0 0 0 0 0
43.8830 8.8770 -25.3610 H 0 0 0 0 0 0 0 0 0 0 0 0 0 0 0 0
44.2230 9.2870 -27.0560 H 0 0 0 0 0 0 0 0 0 0 0 0 0 0 0 0
42.9420 8.1380 -26.6650 H 0 0 0 0 0 0 0 0 0 0 0 0 0 0 0 0
42.3980 10.1880 -26.2580 C 0 0 0 0 0 0 0 0 0 0 0 0 0 0 0 0
41.9630 10.3670 -27.2490 H 0 0 0 0 0 0 0 0 0 0 0 0 0 0 0 0
41.5870 9.8170 -25.6170 H 0 0 0 0 0 0 0 0 0 0 0 0 0 0 0 0
42.9400 11.4330 -25.6850 N 0 0 0 0 0 0 0 0 0 0 0 0 0 0 0 0
41.8370 12.3750 -25.4000 C 0 0 0 0 0 0 0 0 0 0 0 0 0 0 0 0
41.4510 12.8180 -26.3280 H 0 0 0 0 0 0 0 0 0 0 0 0 0 0 0 0
41.0010 11.8300 -24.9400 H 0 0 0 0 0 0 0 0 0 0 0 0 0 0 0 0
42.2600 13.4680 -24.4000 C 0 0 0 0 0 0 0 0 0 0 0 0 0 0 0 0
42.6210 12.9770 -23.4900 H 0 0 0 0 0 0 0 0 0 0 0 0 0 0 0 0
43.0840 14.0660 -24.8040 H 0 0 0 0 0 0 0 0 0 0 0 0 0 0 0 0
41.1240 14.3540 -24.0970 N 0 0 3 0 0 0 0 0 0 0 0 0 0 0 0 0

```

|         |         |          |   |   |   |   |   |   |   |   |   |   |   |   |   |   |   |
|---------|---------|----------|---|---|---|---|---|---|---|---|---|---|---|---|---|---|---|
| 40.8860 | 14.8700 | -24.9450 | H | 0 | 0 | 0 | 0 | 0 | 0 | 0 | 0 | 0 | 0 | 0 | 0 | 0 | 0 |
| 43.9650 | 12.0420 | -26.5520 | C | 0 | 0 | 0 | 0 | 0 | 0 | 0 | 0 | 0 | 0 | 0 | 0 | 0 | 0 |
| 44.0040 | 11.5720 | -27.5420 | H | 0 | 0 | 0 | 0 | 0 | 0 | 0 | 0 | 0 | 0 | 0 | 0 | 0 | 0 |
| 43.7600 | 13.1010 | -26.7490 | H | 0 | 0 | 0 | 0 | 0 | 0 | 0 | 0 | 0 | 0 | 0 | 0 | 0 | 0 |
| 45.3300 | 11.9430 | -25.8830 | C | 0 | 0 | 0 | 0 | 0 | 0 | 0 | 0 | 0 | 0 | 0 | 0 | 0 | 0 |
| 45.6240 | 10.9030 | -25.7120 | H | 0 | 0 | 0 | 0 | 0 | 0 | 0 | 0 | 0 | 0 | 0 | 0 | 0 | 0 |
| 45.3370 | 12.4640 | -24.9200 | H | 0 | 0 | 0 | 0 | 0 | 0 | 0 | 0 | 0 | 0 | 0 | 0 | 0 | 0 |
| 46.0930 | 12.4060 | -26.5180 | H | 0 | 0 | 0 | 0 | 0 | 0 | 0 | 0 | 0 | 0 | 0 | 0 | 0 | 0 |
| 44.8110 | 7.7500  | -11.6690 | C | 0 | 0 | 0 | 0 | 0 | 0 | 0 | 0 | 0 | 0 | 0 | 0 | 0 | 0 |
| 45.8150 | 7.4160  | -11.9580 | H | 0 | 0 | 0 | 0 | 0 | 0 | 0 | 0 | 0 | 0 | 0 | 0 | 0 | 0 |
| 44.2680 | 7.9080  | -12.6060 | H | 0 | 0 | 0 | 0 | 0 | 0 | 0 | 0 | 0 | 0 | 0 | 0 | 0 | 0 |
| 44.1080 | 6.7250  | -10.9480 | O | 0 | 0 | 0 | 0 | 0 | 0 | 0 | 0 | 0 | 0 | 0 | 0 | 0 | 0 |
| 44.8360 | 6.0340  | -10.0220 | C | 0 | 0 | 0 | 0 | 0 | 0 | 0 | 0 | 0 | 0 | 0 | 0 | 0 | 0 |
| 43.9570 | 4.9960  | -9.3640  | C | 0 | 0 | 0 | 0 | 0 | 0 | 0 | 0 | 0 | 0 | 0 | 0 | 0 | 0 |
| 43.0110 | 5.4570  | -9.0570  | H | 0 | 0 | 0 | 0 | 0 | 0 | 0 | 0 | 0 | 0 | 0 | 0 | 0 | 0 |
| 43.7330 | 4.2460  | -10.1320 | H | 0 | 0 | 0 | 0 | 0 | 0 | 0 | 0 | 0 | 0 | 0 | 0 | 0 | 0 |
| 44.6290 | 4.2930  | -8.1750  | C | 0 | 0 | 0 | 0 | 0 | 0 | 0 | 0 | 0 | 0 | 0 | 0 | 0 | 0 |
| 45.7180 | 4.2370  | -8.2970  | H | 0 | 0 | 0 | 0 | 0 | 0 | 0 | 0 | 0 | 0 | 0 | 0 | 0 | 0 |
| 44.2590 | 3.2590  | -8.1980  | H | 0 | 0 | 0 | 0 | 0 | 0 | 0 | 0 | 0 | 0 | 0 | 0 | 0 | 0 |
| 46.0190 | 6.2210  | -9.7750  | O | 0 | 0 | 0 | 0 | 0 | 0 | 0 | 0 | 0 | 0 | 0 | 0 | 0 | 0 |
| 42.4400 | 15.7740 | -18.3250 | C | 0 | 0 | 0 | 0 | 0 | 0 | 0 | 0 | 0 | 0 | 0 | 0 | 0 | 0 |
| 41.9570 | 16.7580 | -18.2750 | H | 0 | 0 | 0 | 0 | 0 | 0 | 0 | 0 | 0 | 0 | 0 | 0 | 0 | 0 |
| 42.1590 | 15.2590 | -17.4010 | H | 0 | 0 | 0 | 0 | 0 | 0 | 0 | 0 | 0 | 0 | 0 | 0 | 0 | 0 |
| 41.4470 | 15.3150 | -23.0400 | C | 0 | 0 | 0 | 0 | 0 | 0 | 0 | 0 | 0 | 0 | 0 | 0 | 0 | 0 |
| 42.4410 | 15.7530 | -23.1980 | H | 0 | 0 | 0 | 0 | 0 | 0 | 0 | 0 | 0 | 0 | 0 | 0 | 0 | 0 |
| 40.7350 | 16.1470 | -23.1120 | H | 0 | 0 | 0 | 0 | 0 | 0 | 0 | 0 | 0 | 0 | 0 | 0 | 0 | 0 |
| 41.3190 | 14.6900 | -21.6540 | C | 0 | 0 | 0 | 0 | 0 | 0 | 0 | 0 | 0 | 0 | 0 | 0 | 0 | 0 |
| 40.2800 | 14.4100 | -21.4520 | H | 0 | 0 | 0 | 0 | 0 | 0 | 0 | 0 | 0 | 0 | 0 | 0 | 0 | 0 |
| 41.9490 | 13.7980 | -21.5720 | H | 0 | 0 | 0 | 0 | 0 | 0 | 0 | 0 | 0 | 0 | 0 | 0 | 0 | 0 |
| 41.7680 | 15.6610 | -20.5950 | C | 0 | 0 | 0 | 0 | 0 | 0 | 0 | 0 | 0 | 0 | 0 | 0 | 0 | 0 |
| 41.9290 | 14.9950 | -19.4160 | O | 0 | 0 | 0 | 0 | 0 | 0 | 0 | 0 | 0 | 0 | 0 | 0 | 0 | 0 |
| 41.9680 | 16.8530 | -20.7690 | O | 0 | 0 | 0 | 0 | 0 | 0 | 0 | 0 | 0 | 0 | 0 | 0 | 0 | 0 |
| 43.9560 | 15.9000 | -18.4230 | C | 0 | 0 | 0 | 0 | 0 | 0 | 0 | 0 | 0 | 0 | 0 | 0 | 0 | 0 |
| 44.4200 | 14.9210 | -18.5960 | H | 0 | 0 | 0 | 0 | 0 | 0 | 0 | 0 | 0 | 0 | 0 | 0 | 0 | 0 |
| 44.2230 | 16.5180 | -19.2870 | H | 0 | 0 | 0 | 0 | 0 | 0 | 0 | 0 | 0 | 0 | 0 | 0 | 0 | 0 |
| 44.4620 | 16.5490 | -17.2600 | O | 0 | 0 | 0 | 0 | 0 | 0 | 0 | 0 | 0 | 0 | 0 | 0 | 0 | 0 |
| 45.3080 | 15.7250 | -16.4570 | C | 0 | 0 | 0 | 0 | 0 | 0 | 0 | 0 | 0 | 0 | 0 | 0 | 0 | 0 |
| 46.1010 | 15.2890 | -17.0750 | H | 0 | 0 | 0 | 0 | 0 | 0 | 0 | 0 | 0 | 0 | 0 | 0 | 0 | 0 |
| 45.7910 | 16.3860 | -15.7290 | H | 0 | 0 | 0 | 0 | 0 | 0 | 0 | 0 | 0 | 0 | 0 | 0 | 0 | 0 |
| 44.5140 | 14.6490 | -15.7170 | C | 0 | 0 | 0 | 0 | 0 | 0 | 0 | 0 | 0 | 0 | 0 | 0 | 0 | 0 |
| 43.7000 | 15.1230 | -15.1540 | H | 0 | 0 | 0 | 0 | 0 | 0 | 0 | 0 | 0 | 0 | 0 | 0 | 0 | 0 |
| 44.0310 | 13.9790 | -16.4380 | H | 0 | 0 | 0 | 0 | 0 | 0 | 0 | 0 | 0 | 0 | 0 | 0 | 0 | 0 |
| 45.3980 | 13.8290 | -14.7780 | C | 0 | 0 | 0 | 0 | 0 | 0 | 0 | 0 | 0 | 0 | 0 | 0 | 0 | 0 |
| 46.2160 | 13.3730 | -15.3480 | H | 0 | 0 | 0 | 0 | 0 | 0 | 0 | 0 | 0 | 0 | 0 | 0 | 0 | 0 |
| 45.8510 | 14.4880 | -14.0290 | H | 0 | 0 | 0 | 0 | 0 | 0 | 0 | 0 | 0 | 0 | 0 | 0 | 0 | 0 |
| 44.5880 | 12.7330 | -14.0800 | C | 0 | 0 | 0 | 0 | 0 | 0 | 0 | 0 | 0 | 0 | 0 | 0 | 0 | 0 |
| 43.7680 | 13.1900 | -13.5110 | H | 0 | 0 | 0 | 0 | 0 | 0 | 0 | 0 | 0 | 0 | 0 | 0 | 0 | 0 |
| 44.1320 | 12.0790 | -14.8330 | H | 0 | 0 | 0 | 0 | 0 | 0 | 0 | 0 | 0 | 0 | 0 | 0 | 0 | 0 |
| 45.4580 | 11.9000 | -13.1410 | C | 0 | 0 | 0 | 0 | 0 | 0 | 0 | 0 | 0 | 0 | 0 | 0 | 0 | 0 |
| 46.2900 | 11.4470 | -13.6950 | H | 0 | 0 | 0 | 0 | 0 | 0 | 0 | 0 | 0 | 0 | 0 | 0 | 0 | 0 |
| 45.9180 | 12.5430 | -12.3800 | H | 0 | 0 | 0 | 0 | 0 | 0 | 0 | 0 | 0 | 0 | 0 | 0 | 0 | 0 |
| 44.6520 | 10.8020 | -12.4550 | C | 0 | 0 | 0 | 0 | 0 | 0 | 0 | 0 | 0 | 0 | 0 | 0 | 0 | 0 |
| 43.8340 | 11.2430 | -11.8740 | H | 0 | 0 | 0 | 0 | 0 | 0 | 0 | 0 | 0 | 0 | 0 | 0 | 0 | 0 |
| 44.2310 | 10.1220 | -13.2030 | H | 0 | 0 | 0 | 0 | 0 | 0 | 0 | 0 | 0 | 0 | 0 | 0 | 0 | 0 |
| 45.5230 | 10.0860 | -11.5810 | O | 0 | 0 | 0 | 0 | 0 | 0 | 0 | 0 | 0 | 0 | 0 | 0 | 0 | 0 |
| 44.8670 | 9.0440  | -10.8610 | C | 0 | 0 | 0 | 0 | 0 | 0 | 0 | 0 | 0 | 0 | 0 | 0 | 0 | 0 |
| 43.8660 | 9.3550  | -10.5370 | H | 0 | 0 | 0 | 0 | 0 | 0 | 0 | 0 | 0 | 0 | 0 | 0 | 0 | 0 |
| 45.4410 | 8.8760  | -9.9440  | H | 0 | 0 | 0 | 0 | 0 | 0 | 0 | 0 | 0 | 0 | 0 | 0 | 0 | 0 |
| 43.9150 | 10.5330 | -4.3200  | C | 0 | 0 | 0 | 0 | 0 | 0 | 0 | 0 | 0 | 0 | 0 | 0 | 0 | 0 |
| 43.4170 | 10.8300 | -5.2490  | H | 0 | 0 | 0 | 0 | 0 | 0 | 0 | 0 | 0 | 0 | 0 | 0 | 0 | 0 |
| 44.9070 | 10.9940 | -4.3000  | H | 0 | 0 | 0 | 0 | 0 | 0 | 0 | 0 | 0 | 0 | 0 | 0 | 0 | 0 |
| 43.3410 | 10.9490 | -3.4860  | H | 0 | 0 | 0 | 0 | 0 | 0 | 0 | 0 | 0 | 0 | 0 | 0 | 0 | 0 |
| 43.9780 | 9.0130  | -4.1980  | C | 0 | 0 | 0 | 0 | 0 | 0 | 0 | 0 | 0 | 0 | 0 | 0 | 0 | 0 |
| 44.4680 | 8.7250  | -3.2590  | H | 0 | 0 | 0 | 0 | 0 | 0 | 0 | 0 | 0 | 0 | 0 | 0 | 0 | 0 |
| 42.9400 | 8.6640  | -4.1340  | H | 0 | 0 | 0 | 0 | 0 | 0 | 0 | 0 | 0 | 0 | 0 | 0 | 0 | 0 |
| 44.6410 | 8.3900  | -5.3580  | N | 0 | 0 | 0 | 0 | 0 | 0 | 0 | 0 | 0 | 0 | 0 | 0 | 0 | 0 |
| 44.3260 | 6.9410  | -5.3910  | C | 0 | 0 | 0 | 0 | 0 | 0 | 0 | 0 | 0 | 0 | 0 | 0 | 0 | 0 |
| 44.7600 | 6.4480  | -4.5120  | H | 0 | 0 | 0 | 0 | 0 | 0 | 0 | 0 | 0 | 0 | 0 | 0 | 0 | 0 |
| 43.2370 | 6.8210  | -5.3250  | H | 0 | 0 | 0 | 0 | 0 | 0 | 0 | 0 | 0 | 0 | 0 | 0 | 0 | 0 |
| 44.7760 | 6.2370  | -6.6930  | C | 0 | 0 | 0 | 0 | 0 | 0 | 0 | 0 | 0 | 0 | 0 | 0 | 0 | 0 |
| 44.3810 | 6.8450  | -7.5140  | H | 0 | 0 | 0 | 0 | 0 | 0 | 0 | 0 | 0 | 0 | 0 | 0 | 0 | 0 |
| 45.8690 | 6.2460  | -6.7760  | H | 0 | 0 | 0 | 0 | 0 | 0 | 0 | 0 | 0 | 0 | 0 | 0 | 0 | 0 |
| 44.2790 | 4.8480  | -6.8450  | N | 0 | 0 | 3 | 0 | 0 | 0 | 0 | 0 | 0 | 0 | 0 | 0 | 0 | 0 |
| 46.0940 | 8.6400  | -5.3590  | C | 0 | 0 | 0 | 0 | 0 | 0 | 0 | 0 | 0 | 0 | 0 | 0 | 0 | 0 |
| 46.3920 | 9.3390  | -4.5680  | H | 0 | 0 | 0 | 0 | 0 | 0 | 0 | 0 | 0 | 0 | 0 | 0 | 0 | 0 |
| 46.6700 | 7.7280  | -5.1600  | H | 0 | 0 | 0 | 0 | 0 | 0 | 0 | 0 | 0 | 0 | 0 | 0 | 0 | 0 |
| 46.5170 | 9.2370  | -6.6950  | C | 0 | 0 | 0 | 0 | 0 | 0 | 0 | 0 | 0 | 0 | 0 | 0 | 0 | 0 |
| 45.9960 | 10.1810 | -6.8890  | H | 0 | 0 | 0 | 0 | 0 | 0 | 0 | 0 | 0 | 0 | 0 | 0 | 0 | 0 |
| 46.3130 | 8.5570  | -7.5270  | H | 0 | 0 | 0 | 0 | 0 | 0 | 0 | 0 | 0 | 0 | 0 | 0 | 0 | 0 |
| 47.5920 | 9.4430  | -6.6890  | H | 0 | 0 | 0 | 0 | 0 | 0 | 0 | 0 | 0 | 0 | 0 | 0 | 0 | 0 |
| 35.4970 | 0.3900  | 5.7430   | C | 0 | 0 | 0 | 0 | 0 | 0 | 0 | 0 | 0 | 0 | 0 | 0 | 0 | 0 |

|         |         |         |   |   |   |   |   |   |   |   |   |   |   |   |   |
|---------|---------|---------|---|---|---|---|---|---|---|---|---|---|---|---|---|
| 35.1730 | -0.6150 | 5.4480  | H | 0 | 0 | 0 | 0 | 0 | 0 | 0 | 0 | 0 | 0 | 0 | 0 |
| 35.6760 | 0.9320  | 4.8090  | H | 0 | 0 | 0 | 0 | 0 | 0 | 0 | 0 | 0 | 0 | 0 | 0 |
| 34.4570 | 1.0930  | 6.4390  | O | 0 | 0 | 0 | 0 | 0 | 0 | 0 | 0 | 0 | 0 | 0 | 0 |
| 33.7410 | 0.3670  | 7.3420  | C | 0 | 0 | 0 | 0 | 0 | 0 | 0 | 0 | 0 | 0 | 0 | 0 |
| 32.7300 | 1.2460  | 8.0300  | C | 0 | 0 | 0 | 0 | 0 | 0 | 0 | 0 | 0 | 0 | 0 | 0 |
| 32.7300 | 2.2390  | 7.5710  | H | 0 | 0 | 0 | 0 | 0 | 0 | 0 | 0 | 0 | 0 | 0 | 0 |
| 31.7380 | 0.8210  | 7.8410  | H | 0 | 0 | 0 | 0 | 0 | 0 | 0 | 0 | 0 | 0 | 0 | 0 |
| 33.0020 | 1.3170  | 9.5310  | C | 0 | 0 | 0 | 0 | 0 | 0 | 0 | 0 | 0 | 0 | 0 | 0 |
| 32.8780 | 0.3030  | 9.9330  | H | 0 | 0 | 0 | 0 | 0 | 0 | 0 | 0 | 0 | 0 | 0 | 0 |
| 32.2240 | 1.9150  | 10.0220 | H | 0 | 0 | 0 | 0 | 0 | 0 | 0 | 0 | 0 | 0 | 0 | 0 |
| 33.8930 | -0.8240 | 7.5800  | O | 0 | 0 | 0 | 0 | 0 | 0 | 0 | 0 | 0 | 0 | 0 | 0 |
| 44.9370 | 2.6220  | -1.4870 | C | 0 | 0 | 0 | 0 | 0 | 0 | 0 | 0 | 0 | 0 | 0 | 0 |
| 45.7450 | 1.9600  | -1.8220 | H | 0 | 0 | 0 | 0 | 0 | 0 | 0 | 0 | 0 | 0 | 0 | 0 |
| 45.4010 | 3.3320  | -0.7920 | H | 0 | 0 | 0 | 0 | 0 | 0 | 0 | 0 | 0 | 0 | 0 | 0 |
| 44.7880 | 3.9590  | -5.7790 | C | 0 | 0 | 0 | 0 | 0 | 0 | 0 | 0 | 0 | 0 | 0 | 0 |
| 45.1790 | 3.0200  | -6.1940 | H | 0 | 0 | 0 | 0 | 0 | 0 | 0 | 0 | 0 | 0 | 0 | 0 |
| 45.6410 | 4.4000  | -5.2470 | H | 0 | 0 | 0 | 0 | 0 | 0 | 0 | 0 | 0 | 0 | 0 | 0 |
| 43.6650 | 3.6090  | -4.8080 | C | 0 | 0 | 0 | 0 | 0 | 0 | 0 | 0 | 0 | 0 | 0 | 0 |
| 43.2300 | 4.5010  | -4.3440 | H | 0 | 0 | 0 | 0 | 0 | 0 | 0 | 0 | 0 | 0 | 0 | 0 |
| 42.8420 | 3.0930  | -5.3180 | H | 0 | 0 | 0 | 0 | 0 | 0 | 0 | 0 | 0 | 0 | 0 | 0 |
| 44.1890 | 2.6920  | -3.7360 | C | 0 | 0 | 0 | 0 | 0 | 0 | 0 | 0 | 0 | 0 | 0 | 0 |
| 44.4040 | 3.3830  | -2.5820 | O | 0 | 0 | 0 | 0 | 0 | 0 | 0 | 0 | 0 | 0 | 0 | 0 |
| 44.4060 | 1.4990  | -3.8990 | O | 0 | 0 | 0 | 0 | 0 | 0 | 0 | 0 | 0 | 0 | 0 | 0 |
| 43.8380 | 1.8450  | -0.7700 | C | 0 | 0 | 0 | 0 | 0 | 0 | 0 | 0 | 0 | 0 | 0 | 0 |
| 43.0490 | 2.5390  | -0.4590 | H | 0 | 0 | 0 | 0 | 0 | 0 | 0 | 0 | 0 | 0 | 0 | 0 |
| 43.3880 | 1.1100  | -1.4460 | H | 0 | 0 | 0 | 0 | 0 | 0 | 0 | 0 | 0 | 0 | 0 | 0 |
| 44.4030 | 1.1920  | 0.3630  | O | 0 | 0 | 0 | 0 | 0 | 0 | 0 | 0 | 0 | 0 | 0 | 0 |
| 43.4960 | 0.3060  | 1.0200  | C | 0 | 0 | 0 | 0 | 0 | 0 | 0 | 0 | 0 | 0 | 0 | 0 |
| 43.0280 | -0.3660 | 0.2920  | H | 0 | 0 | 0 | 0 | 0 | 0 | 0 | 0 | 0 | 0 | 0 | 0 |
| 44.1000 | -0.3150 | 1.6910  | H | 0 | 0 | 0 | 0 | 0 | 0 | 0 | 0 | 0 | 0 | 0 | 0 |
| 42.4470 | 1.0610  | 1.8380  | C | 0 | 0 | 0 | 0 | 0 | 0 | 0 | 0 | 0 | 0 | 0 | 0 |
| 42.9490 | 1.7890  | 2.4880  | H | 0 | 0 | 0 | 0 | 0 | 0 | 0 | 0 | 0 | 0 | 0 | 0 |
| 41.8030 | 1.6440  | 1.1710  | H | 0 | 0 | 0 | 0 | 0 | 0 | 0 | 0 | 0 | 0 | 0 | 0 |
| 41.5870 | 0.1110  | 2.6740  | C | 0 | 0 | 0 | 0 | 0 | 0 | 0 | 0 | 0 | 0 | 0 | 0 |
| 41.1080 | -0.6240 | 2.0160  | H | 0 | 0 | 0 | 0 | 0 | 0 | 0 | 0 | 0 | 0 | 0 | 0 |
| 42.2260 | -0.4450 | 3.3710  | H | 0 | 0 | 0 | 0 | 0 | 0 | 0 | 0 | 0 | 0 | 0 | 0 |
| 40.5130 | 0.8720  | 3.4560  | C | 0 | 0 | 0 | 0 | 0 | 0 | 0 | 0 | 0 | 0 | 0 | 0 |
| 40.9900 | 1.6200  | 4.1020  | H | 0 | 0 | 0 | 0 | 0 | 0 | 0 | 0 | 0 | 0 | 0 | 0 |
| 39.8670 | 1.4160  | 2.7560  | H | 0 | 0 | 0 | 0 | 0 | 0 | 0 | 0 | 0 | 0 | 0 | 0 |
| 39.6640 | -0.0700 | 4.3100  | C | 0 | 0 | 0 | 0 | 0 | 0 | 0 | 0 | 0 | 0 | 0 | 0 |
| 39.2010 | -0.8400 | 3.6800  | H | 0 | 0 | 0 | 0 | 0 | 0 | 0 | 0 | 0 | 0 | 0 | 0 |
| 40.2990 | -0.6080 | 5.0250  | H | 0 | 0 | 0 | 0 | 0 | 0 | 0 | 0 | 0 | 0 | 0 | 0 |
| 38.5730 | 0.6820  | 5.0680  | C | 0 | 0 | 0 | 0 | 0 | 0 | 0 | 0 | 0 | 0 | 0 | 0 |
| 39.0220 | 1.4380  | 5.7220  | H | 0 | 0 | 0 | 0 | 0 | 0 | 0 | 0 | 0 | 0 | 0 | 0 |
| 37.9000 | 1.1780  | 4.3600  | H | 0 | 0 | 0 | 0 | 0 | 0 | 0 | 0 | 0 | 0 | 0 | 0 |
| 37.8470 | -0.2550 | 5.8630  | O | 0 | 0 | 0 | 0 | 0 | 0 | 0 | 0 | 0 | 0 | 0 | 0 |
| 36.7700 | 0.3390  | 6.5850  | C | 0 | 0 | 0 | 0 | 0 | 0 | 0 | 0 | 0 | 0 | 0 | 0 |
| 37.0420 | 1.3340  | 6.9590  | H | 0 | 0 | 0 | 0 | 0 | 0 | 0 | 0 | 0 | 0 | 0 | 0 |
| 36.5930 | -0.2800 | 7.4720  | H | 0 | 0 | 0 | 0 | 0 | 0 | 0 | 0 | 0 | 0 | 0 | 0 |
| 34.5660 | 7.9430  | 8.6360  | C | 0 | 0 | 0 | 0 | 0 | 0 | 0 | 0 | 0 | 0 | 0 | 0 |
| 35.5580 | 7.9340  | 9.1000  | H | 0 | 0 | 0 | 0 | 0 | 0 | 0 | 0 | 0 | 0 | 0 | 0 |
| 33.8800 | 8.4840  | 9.2950  | H | 0 | 0 | 0 | 0 | 0 | 0 | 0 | 0 | 0 | 0 | 0 | 0 |
| 34.6390 | 8.5090  | 7.7020  | H | 0 | 0 | 0 | 0 | 0 | 0 | 0 | 0 | 0 | 0 | 0 | 0 |
| 34.0850 | 6.5240  | 8.3460  | C | 0 | 0 | 0 | 0 | 0 | 0 | 0 | 0 | 0 | 0 | 0 | 0 |
| 33.0880 | 6.5530  | 7.8880  | H | 0 | 0 | 0 | 0 | 0 | 0 | 0 | 0 | 0 | 0 | 0 | 0 |
| 34.7690 | 6.1140  | 7.5910  | H | 0 | 0 | 0 | 0 | 0 | 0 | 0 | 0 | 0 | 0 | 0 | 0 |
| 34.0960 | 5.6570  | 9.5370  | N | 0 | 0 | 0 | 0 | 0 | 0 | 0 | 0 | 0 | 0 | 0 | 0 |
| 33.8940 | 4.2480  | 9.1360  | C | 0 | 0 | 0 | 0 | 0 | 0 | 0 | 0 | 0 | 0 | 0 | 0 |
| 32.8520 | 4.0900  | 8.8370  | H | 0 | 0 | 0 | 0 | 0 | 0 | 0 | 0 | 0 | 0 | 0 | 0 |
| 34.5220 | 4.0260  | 8.2620  | H | 0 | 0 | 0 | 0 | 0 | 0 | 0 | 0 | 0 | 0 | 0 | 0 |
| 34.3140 | 3.2630  | 10.2500 | C | 0 | 0 | 0 | 0 | 0 | 0 | 0 | 0 | 0 | 0 | 0 | 0 |
| 35.3130 | 3.5750  | 10.5710 | H | 0 | 0 | 0 | 0 | 0 | 0 | 0 | 0 | 0 | 0 | 0 | 0 |
| 33.6630 | 3.3670  | 11.1280 | H | 0 | 0 | 0 | 0 | 0 | 0 | 0 | 0 | 0 | 0 | 0 | 0 |
| 34.3540 | 1.8450  | 9.8170  | N | 0 | 0 | 3 | 0 | 0 | 0 | 0 | 0 | 0 | 0 | 0 | 0 |
| 33.1080 | 6.0850  | 10.5440 | C | 0 | 0 | 0 | 0 | 0 | 0 | 0 | 0 | 0 | 0 | 0 | 0 |
| 32.4430 | 6.8710  | 10.1650 | H | 0 | 0 | 0 | 0 | 0 | 0 | 0 | 0 | 0 | 0 | 0 | 0 |
| 32.4390 | 5.2680  | 10.8390 | H | 0 | 0 | 0 | 0 | 0 | 0 | 0 | 0 | 0 | 0 | 0 | 0 |
| 33.8290 | 6.5850  | 11.7890 | C | 0 | 0 | 0 | 0 | 0 | 0 | 0 | 0 | 0 | 0 | 0 | 0 |
| 34.4700 | 7.4430  | 11.5680 | H | 0 | 0 | 0 | 0 | 0 | 0 | 0 | 0 | 0 | 0 | 0 | 0 |
| 34.4500 | 5.7980  | 12.2300 | H | 0 | 0 | 0 | 0 | 0 | 0 | 0 | 0 | 0 | 0 | 0 | 0 |
| 33.1000 | 6.8970  | 12.5440 | H | 0 | 0 | 0 | 0 | 0 | 0 | 0 | 0 | 0 | 0 | 0 | 0 |
| 48.7720 | 4.1270  | 10.9990 | C | 0 | 0 | 0 | 0 | 0 | 0 | 0 | 0 | 0 | 0 | 0 | 0 |
| 48.4710 | 5.1610  | 11.2070 | H | 0 | 0 | 0 | 0 | 0 | 0 | 0 | 0 | 0 | 0 | 0 | 0 |
| 47.9430 | 3.6820  | 10.4400 | H | 0 | 0 | 0 | 0 | 0 | 0 | 0 | 0 | 0 | 0 | 0 | 0 |
| 49.9230 | 4.0770  | 10.1380 | O | 0 | 0 | 0 | 0 | 0 | 0 | 0 | 0 | 0 | 0 | 0 | 0 |
| 50.8880 | 5.0090  | 10.3800 | C | 0 | 0 | 0 | 0 | 0 | 0 | 0 | 0 | 0 | 0 | 0 | 0 |
| 52.0060 | 4.8670  | 9.3790  | C | 0 | 0 | 0 | 0 | 0 | 0 | 0 | 0 | 0 | 0 | 0 | 0 |
| 51.9890 | 3.8660  | 8.9380  | H | 0 | 0 | 0 | 0 | 0 | 0 | 0 | 0 | 0 | 0 | 0 | 0 |
| 51.7810 | 5.5710  | 8.5680  | H | 0 | 0 | 0 | 0 | 0 | 0 | 0 | 0 | 0 | 0 | 0 | 0 |
| 53.3830 | 5.2010  | 9.9670  | C | 0 | 0 | 0 | 0 | 0 | 0 | 0 | 0 | 0 | 0 | 0 | 0 |
| 53.3100 | 6.0370  | 10.6750 | H | 0 | 0 | 0 | 0 | 0 | 0 | 0 | 0 | 0 | 0 | 0 | 0 |

|         |         |         |   |   |   |   |   |   |   |   |   |   |   |   |   |   |   |   |   |
|---------|---------|---------|---|---|---|---|---|---|---|---|---|---|---|---|---|---|---|---|---|
| 54.0040 | 5.5930  | 9.1490  | H | 0 | 0 | 0 | 0 | 0 | 0 | 0 | 0 | 0 | 0 | 0 | 0 | 0 | 0 | 0 | 0 |
| 50.8430 | 5.8600  | 11.2580 | O | 0 | 0 | 0 | 0 | 0 | 0 | 0 | 0 | 0 | 0 | 0 | 0 | 0 | 0 | 0 | 0 |
| 39.2970 | -0.1650 | 12.8480 | C | 0 | 0 | 0 | 0 | 0 | 0 | 0 | 0 | 0 | 0 | 0 | 0 | 0 | 0 | 0 | 0 |
| 38.9230 | -1.1820 | 13.0190 | H | 0 | 0 | 0 | 0 | 0 | 0 | 0 | 0 | 0 | 0 | 0 | 0 | 0 | 0 | 0 | 0 |
| 40.3190 | -0.2840 | 12.4740 | H | 0 | 0 | 0 | 0 | 0 | 0 | 0 | 0 | 0 | 0 | 0 | 0 | 0 | 0 | 0 | 0 |
| 35.0280 | 1.0090  | 10.8330 | C | 0 | 0 | 0 | 0 | 0 | 0 | 0 | 0 | 0 | 0 | 0 | 0 | 0 | 0 | 0 | 0 |
| 34.6170 | 1.2050  | 11.8320 | H | 0 | 0 | 0 | 0 | 0 | 0 | 0 | 0 | 0 | 0 | 0 | 0 | 0 | 0 | 0 | 0 |
| 34.8400 | -0.0520 | 10.6230 | H | 0 | 0 | 0 | 0 | 0 | 0 | 0 | 0 | 0 | 0 | 0 | 0 | 0 | 0 | 0 | 0 |
| 36.5490 | 1.1840  | 10.8130 | C | 0 | 0 | 0 | 0 | 0 | 0 | 0 | 0 | 0 | 0 | 0 | 0 | 0 | 0 | 0 | 0 |
| 36.9470 | 0.8800  | 9.8380  | H | 0 | 0 | 0 | 0 | 0 | 0 | 0 | 0 | 0 | 0 | 0 | 0 | 0 | 0 | 0 | 0 |
| 36.8390 | 2.2210  | 11.0080 | H | 0 | 0 | 0 | 0 | 0 | 0 | 0 | 0 | 0 | 0 | 0 | 0 | 0 | 0 | 0 | 0 |
| 37.1940 | 0.3390  | 11.8790 | C | 0 | 0 | 0 | 0 | 0 | 0 | 0 | 0 | 0 | 0 | 0 | 0 | 0 | 0 | 0 | 0 |
| 38.5460 | 0.5070  | 11.8270 | O | 0 | 0 | 0 | 0 | 0 | 0 | 0 | 0 | 0 | 0 | 0 | 0 | 0 | 0 | 0 | 0 |
| 36.5980 | -0.3590 | 12.6860 | O | 0 | 0 | 0 | 0 | 0 | 0 | 0 | 0 | 0 | 0 | 0 | 0 | 0 | 0 | 0 | 0 |
| 39.2950 | 0.6540  | 14.1350 | C | 0 | 0 | 0 | 0 | 0 | 0 | 0 | 0 | 0 | 0 | 0 | 0 | 0 | 0 | 0 | 0 |
| 39.5590 | 1.6990  | 13.9310 | H | 0 | 0 | 0 | 0 | 0 | 0 | 0 | 0 | 0 | 0 | 0 | 0 | 0 | 0 | 0 | 0 |
| 38.2860 | 0.6740  | 14.5600 | H | 0 | 0 | 0 | 0 | 0 | 0 | 0 | 0 | 0 | 0 | 0 | 0 | 0 | 0 | 0 | 0 |
| 40.1530 | 0.0490  | 15.0980 | O | 0 | 0 | 0 | 0 | 0 | 0 | 0 | 0 | 0 | 0 | 0 | 0 | 0 | 0 | 0 | 0 |
| 41.2790 | 0.8530  | 15.4530 | C | 0 | 0 | 0 | 0 | 0 | 0 | 0 | 0 | 0 | 0 | 0 | 0 | 0 | 0 | 0 | 0 |
| 40.9490 | 1.8610  | 15.7280 | H | 0 | 0 | 0 | 0 | 0 | 0 | 0 | 0 | 0 | 0 | 0 | 0 | 0 | 0 | 0 | 0 |
| 41.7190 | 0.4020  | 16.3490 | H | 0 | 0 | 0 | 0 | 0 | 0 | 0 | 0 | 0 | 0 | 0 | 0 | 0 | 0 | 0 | 0 |
| 42.3230 | 0.8820  | 14.3370 | C | 0 | 0 | 0 | 0 | 0 | 0 | 0 | 0 | 0 | 0 | 0 | 0 | 0 | 0 | 0 | 0 |
| 42.6090 | -0.1470 | 14.0840 | H | 0 | 0 | 0 | 0 | 0 | 0 | 0 | 0 | 0 | 0 | 0 | 0 | 0 | 0 | 0 | 0 |
| 41.8850 | 1.3050  | 13.4260 | H | 0 | 0 | 0 | 0 | 0 | 0 | 0 | 0 | 0 | 0 | 0 | 0 | 0 | 0 | 0 | 0 |
| 43.5570 | 1.6960  | 14.7260 | C | 0 | 0 | 0 | 0 | 0 | 0 | 0 | 0 | 0 | 0 | 0 | 0 | 0 | 0 | 0 | 0 |
| 43.2580 | 2.7250  | 14.9590 | H | 0 | 0 | 0 | 0 | 0 | 0 | 0 | 0 | 0 | 0 | 0 | 0 | 0 | 0 | 0 | 0 |
| 44.0090 | 1.2750  | 15.6320 | H | 0 | 0 | 0 | 0 | 0 | 0 | 0 | 0 | 0 | 0 | 0 | 0 | 0 | 0 | 0 | 0 |
| 44.5860 | 1.7030  | 13.5940 | C | 0 | 0 | 0 | 0 | 0 | 0 | 0 | 0 | 0 | 0 | 0 | 0 | 0 | 0 | 0 | 0 |
| 44.9130 | 0.6750  | 13.3910 | H | 0 | 0 | 0 | 0 | 0 | 0 | 0 | 0 | 0 | 0 | 0 | 0 | 0 | 0 | 0 | 0 |
| 44.1200 | 2.0790  | 12.6750 | H | 0 | 0 | 0 | 0 | 0 | 0 | 0 | 0 | 0 | 0 | 0 | 0 | 0 | 0 | 0 | 0 |
| 45.7980 | 2.5680  | 13.9360 | C | 0 | 0 | 0 | 0 | 0 | 0 | 0 | 0 | 0 | 0 | 0 | 0 | 0 | 0 | 0 | 0 |
| 45.4840 | 3.6020  | 14.1240 | H | 0 | 0 | 0 | 0 | 0 | 0 | 0 | 0 | 0 | 0 | 0 | 0 | 0 | 0 | 0 | 0 |
| 46.2640 | 2.2200  | 14.8660 | H | 0 | 0 | 0 | 0 | 0 | 0 | 0 | 0 | 0 | 0 | 0 | 0 | 0 | 0 | 0 | 0 |
| 46.8330 | 2.5480  | 12.8150 | C | 0 | 0 | 0 | 0 | 0 | 0 | 0 | 0 | 0 | 0 | 0 | 0 | 0 | 0 | 0 | 0 |
| 47.2040 | 1.5280  | 12.6660 | H | 0 | 0 | 0 | 0 | 0 | 0 | 0 | 0 | 0 | 0 | 0 | 0 | 0 | 0 | 0 | 0 |
| 46.3810 | 2.9040  | 11.8830 | H | 0 | 0 | 0 | 0 | 0 | 0 | 0 | 0 | 0 | 0 | 0 | 0 | 0 | 0 | 0 | 0 |
| 47.9110 | 3.4070  | 13.1840 | O | 0 | 0 | 0 | 0 | 0 | 0 | 0 | 0 | 0 | 0 | 0 | 0 | 0 | 0 | 0 | 0 |
| 49.0210 | 3.3490  | 12.2890 | C | 0 | 0 | 0 | 0 | 0 | 0 | 0 | 0 | 0 | 0 | 0 | 0 | 0 | 0 | 0 | 0 |
| 49.2960 | 2.3090  | 12.0770 | H | 0 | 0 | 0 | 0 | 0 | 0 | 0 | 0 | 0 | 0 | 0 | 0 | 0 | 0 | 0 | 0 |
| 49.8790 | 3.7820  | 12.8160 | H | 0 | 0 | 0 | 0 | 0 | 0 | 0 | 0 | 0 | 0 | 0 | 0 | 0 | 0 | 0 | 0 |
| 58.0550 | -0.1550 | 8.3270  | C | 0 | 0 | 0 | 0 | 0 | 0 | 0 | 0 | 0 | 0 | 0 | 0 | 0 | 0 | 0 | 0 |
| 58.2080 | 0.5360  | 7.4910  | H | 0 | 0 | 0 | 0 | 0 | 0 | 0 | 0 | 0 | 0 | 0 | 0 | 0 | 0 | 0 | 0 |
| 57.4920 | -1.0180 | 7.9610  | H | 0 | 0 | 0 | 0 | 0 | 0 | 0 | 0 | 0 | 0 | 0 | 0 | 0 | 0 | 0 | 0 |
| 59.0380 | -0.5150 | 8.6480  | H | 0 | 0 | 0 | 0 | 0 | 0 | 0 | 0 | 0 | 0 | 0 | 0 | 0 | 0 | 0 | 0 |
| 57.3530 | 0.5410  | 9.4900  | C | 0 | 0 | 0 | 0 | 0 | 0 | 0 | 0 | 0 | 0 | 0 | 0 | 0 | 0 | 0 | 0 |
| 57.2090 | -0.1610 | 10.3210 | H | 0 | 0 | 0 | 0 | 0 | 0 | 0 | 0 | 0 | 0 | 0 | 0 | 0 | 0 | 0 | 0 |
| 58.0420 | 1.3180  | 9.8470  | H | 0 | 0 | 0 | 0 | 0 | 0 | 0 | 0 | 0 | 0 | 0 | 0 | 0 | 0 | 0 | 0 |
| 56.0780 | 1.1600  | 9.0910  | N | 0 | 0 | 0 | 0 | 0 | 0 | 0 | 0 | 0 | 0 | 0 | 0 | 0 | 0 | 0 | 0 |
| 55.6140 | 2.0960  | 10.1390 | C | 0 | 0 | 0 | 0 | 0 | 0 | 0 | 0 | 0 | 0 | 0 | 0 | 0 | 0 | 0 | 0 |
| 55.3020 | 1.5320  | 11.0260 | H | 0 | 0 | 0 | 0 | 0 | 0 | 0 | 0 | 0 | 0 | 0 | 0 | 0 | 0 | 0 | 0 |
| 56.4530 | 2.7390  | 10.4390 | H | 0 | 0 | 0 | 0 | 0 | 0 | 0 | 0 | 0 | 0 | 0 | 0 | 0 | 0 | 0 | 0 |
| 54.4820 | 3.0310  | 9.6530  | C | 0 | 0 | 0 | 0 | 0 | 0 | 0 | 0 | 0 | 0 | 0 | 0 | 0 | 0 | 0 | 0 |
| 54.8220 | 3.4840  | 8.7120  | H | 0 | 0 | 0 | 0 | 0 | 0 | 0 | 0 | 0 | 0 | 0 | 0 | 0 | 0 | 0 | 0 |
| 53.5880 | 2.4430  | 9.4180  | H | 0 | 0 | 0 | 0 | 0 | 0 | 0 | 0 | 0 | 0 | 0 | 0 | 0 | 0 | 0 | 0 |
| 54.1470 | 4.1110  | 10.6020 | N | 0 | 0 | 3 | 0 | 0 | 0 | 0 | 0 | 0 | 0 | 0 | 0 | 0 | 0 | 0 | 0 |
| 55.0530 | 0.1540  | 8.7580  | C | 0 | 0 | 0 | 0 | 0 | 0 | 0 | 0 | 0 | 0 | 0 | 0 | 0 | 0 | 0 | 0 |
| 55.4170 | -0.8710 | 8.8990  | H | 0 | 0 | 0 | 0 | 0 | 0 | 0 | 0 | 0 | 0 | 0 | 0 | 0 | 0 | 0 | 0 |
| 54.1710 | 0.2310  | 9.4060  | H | 0 | 0 | 0 | 0 | 0 | 0 | 0 | 0 | 0 | 0 | 0 | 0 | 0 | 0 | 0 | 0 |
| 54.6210 | 0.3260  | 7.3080  | C | 0 | 0 | 0 | 0 | 0 | 0 | 0 | 0 | 0 | 0 | 0 | 0 | 0 | 0 | 0 | 0 |
| 55.4640 | 0.1930  | 6.6220  | H | 0 | 0 | 0 | 0 | 0 | 0 | 0 | 0 | 0 | 0 | 0 | 0 | 0 | 0 | 0 | 0 |
| 54.1900 | 1.3170  | 7.1330  | H | 0 | 0 | 0 | 0 | 0 | 0 | 0 | 0 | 0 | 0 | 0 | 0 | 0 | 0 | 0 | 0 |
| 53.8610 | -0.4200 | 7.0520  | H | 0 | 0 | 0 | 0 | 0 | 0 | 0 | 0 | 0 | 0 | 0 | 0 | 0 | 0 | 0 | 0 |
| 58.2120 | 11.0850 | 20.7490 | C | 0 | 0 | 0 | 0 | 0 | 0 | 0 | 0 | 0 | 0 | 0 | 0 | 0 | 0 | 0 | 0 |
| 57.3180 | 11.3680 | 21.3170 | H | 0 | 0 | 0 | 0 | 0 | 0 | 0 | 0 | 0 | 0 | 0 | 0 | 0 | 0 | 0 | 0 |
| 57.9100 | 10.4260 | 19.9280 | H | 0 | 0 | 0 | 0 | 0 | 0 | 0 | 0 | 0 | 0 | 0 | 0 | 0 | 0 | 0 | 0 |
| 58.8490 | 12.2490 | 20.2050 | O | 0 | 0 | 0 | 0 | 0 | 0 | 0 | 0 | 0 | 0 | 0 | 0 | 0 | 0 | 0 | 0 |
| 58.0240 | 13.0820 | 19.5140 | C | 0 | 0 | 0 | 0 | 0 | 0 | 0 | 0 | 0 | 0 | 0 | 0 | 0 | 0 | 0 | 0 |
| 58.7590 | 14.3200 | 19.0810 | C | 0 | 0 | 0 | 0 | 0 | 0 | 0 | 0 | 0 | 0 | 0 | 0 | 0 | 0 | 0 | 0 |
| 59.8420 | 14.1530 | 19.1140 | H | 0 | 0 | 0 | 0 | 0 | 0 | 0 | 0 | 0 | 0 | 0 | 0 | 0 | 0 | 0 | 0 |
| 58.5150 | 14.4780 | 18.0230 | H | 0 | 0 | 0 | 0 | 0 | 0 | 0 | 0 | 0 | 0 | 0 | 0 | 0 | 0 | 0 | 0 |
| 58.3550 | 15.5480 | 19.8960 | C | 0 | 0 | 0 | 0 | 0 | 0 | 0 | 0 | 0 | 0 | 0 | 0 | 0 | 0 | 0 | 0 |
| 57.2670 | 15.6170 | 20.0210 | H | 0 | 0 | 0 | 0 | 0 | 0 | 0 | 0 | 0 | 0 | 0 | 0 | 0 | 0 | 0 | 0 |
| 58.6400 | 16.4190 | 19.2930 | H | 0 | 0 | 0 | 0 | 0 | 0 | 0 | 0 | 0 | 0 | 0 | 0 | 0 | 0 | 0 | 0 |
| 56.8390 | 12.8790 | 19.2850 | O | 0 | 0 | 0 | 0 | 0 | 0 | 0 | 0 | 0 | 0 | 0 | 0 | 0 | 0 | 0 | 0 |
| 54.2640 | 3.3400  | 16.6240 | C | 0 | 0 | 0 | 0 | 0 | 0 | 0 | 0 | 0 | 0 | 0 | 0 | 0 | 0 | 0 | 0 |
| 53.8870 | 2.3110  | 16.6880 | H | 0 | 0 | 0 | 0 | 0 | 0 | 0 | 0 | 0 | 0 | 0 | 0 | 0 | 0 | 0 | 0 |
| 55.1200 | 3.3860  | 17.3060 | H | 0 | 0 | 0 | 0 | 0 | 0 | 0 | 0 | 0 | 0 | 0 | 0 | 0 | 0 | 0 | 0 |
| 53.5520 | 3.6330  | 11.8550 | C | 0 | 0 | 0 | 0 | 0 | 0 | 0 | 0 | 0 | 0 | 0 | 0 | 0 | 0 | 0 | 0 |
| 52.7320 | 4.2830  | 12.1790 | H | 0 | 0 | 0 | 0 | 0 | 0 | 0 | 0 | 0 | 0 | 0 | 0 | 0 | 0 | 0 | 0 |
| 53.1060 | 2.6370  | 11.7380 | H | 0 | 0 | 0 | 0 | 0 | 0 | 0 | 0 | 0 | 0 | 0 | 0 | 0 | 0 | 0 | 0 |
| 54.5930 | 3.6490  | 12.9740 | C | 0 | 0 | 0 | 0 | 0 | 0 | 0 | 0 | 0 | 0 | 0 | 0 | 0 | 0 | 0 | 0 |





|         |         |         |   |   |   |   |   |   |   |   |   |   |   |   |   |
|---------|---------|---------|---|---|---|---|---|---|---|---|---|---|---|---|---|
| 57.8450 | 12.5720 | 28.5600 | O | 0 | 0 | 0 | 0 | 0 | 0 | 0 | 0 | 0 | 0 | 0 | 0 |
| 57.5250 | 13.4170 | 29.6650 | C | 0 | 0 | 0 | 0 | 0 | 0 | 0 | 0 | 0 | 0 | 0 | 0 |
| 57.0380 | 14.3360 | 29.3180 | H | 0 | 0 | 0 | 0 | 0 | 0 | 0 | 0 | 0 | 0 | 0 | 0 |
| 56.7950 | 12.8730 | 30.2740 | H | 0 | 0 | 0 | 0 | 0 | 0 | 0 | 0 | 0 | 0 | 0 | 0 |
| 58.7620 | 13.7170 | 30.5090 | C | 0 | 0 | 0 | 0 | 0 | 0 | 0 | 0 | 0 | 0 | 0 | 0 |
| 59.2400 | 12.7740 | 30.8010 | H | 0 | 0 | 0 | 0 | 0 | 0 | 0 | 0 | 0 | 0 | 0 | 0 |
| 59.5030 | 14.2580 | 29.9100 | H | 0 | 0 | 0 | 0 | 0 | 0 | 0 | 0 | 0 | 0 | 0 | 0 |
| 58.4060 | 14.5370 | 31.7480 | C | 0 | 0 | 0 | 0 | 0 | 0 | 0 | 0 | 0 | 0 | 0 | 0 |
| 57.9210 | 15.4710 | 31.4400 | H | 0 | 0 | 0 | 0 | 0 | 0 | 0 | 0 | 0 | 0 | 0 | 0 |
| 57.6850 | 13.9850 | 32.3630 | H | 0 | 0 | 0 | 0 | 0 | 0 | 0 | 0 | 0 | 0 | 0 | 0 |
| 59.6490 | 14.8570 | 32.5810 | C | 0 | 0 | 0 | 0 | 0 | 0 | 0 | 0 | 0 | 0 | 0 | 0 |
| 60.1200 | 13.9250 | 32.9160 | H | 0 | 0 | 0 | 0 | 0 | 0 | 0 | 0 | 0 | 0 | 0 | 0 |
| 60.3810 | 15.3840 | 31.9570 | H | 0 | 0 | 0 | 0 | 0 | 0 | 0 | 0 | 0 | 0 | 0 | 0 |
| 59.2980 | 15.7200 | 33.7910 | C | 0 | 0 | 0 | 0 | 0 | 0 | 0 | 0 | 0 | 0 | 0 | 0 |
| 58.7860 | 16.6320 | 33.4650 | H | 0 | 0 | 0 | 0 | 0 | 0 | 0 | 0 | 0 | 0 | 0 | 0 |
| 58.5840 | 15.1950 | 34.4380 | H | 0 | 0 | 0 | 0 | 0 | 0 | 0 | 0 | 0 | 0 | 0 | 0 |
| 60.5380 | 16.0850 | 34.6030 | C | 0 | 0 | 0 | 0 | 0 | 0 | 0 | 0 | 0 | 0 | 0 | 0 |
| 60.9640 | 15.1800 | 35.0500 | H | 0 | 0 | 0 | 0 | 0 | 0 | 0 | 0 | 0 | 0 | 0 | 0 |
| 61.3120 | 16.5340 | 33.9700 | H | 0 | 0 | 0 | 0 | 0 | 0 | 0 | 0 | 0 | 0 | 0 | 0 |
| 60.1590 | 16.9490 | 35.6740 | O | 0 | 0 | 0 | 0 | 0 | 0 | 0 | 0 | 0 | 0 | 0 | 0 |
| 60.6750 | 18.2740 | 35.5660 | C | 0 | 0 | 0 | 0 | 0 | 0 | 0 | 0 | 0 | 0 | 0 | 0 |
| 61.7620 | 18.2500 | 35.4150 | H | 0 | 0 | 0 | 0 | 0 | 0 | 0 | 0 | 0 | 0 | 0 | 0 |
| 60.5200 | 18.7590 | 36.5360 | H | 0 | 0 | 0 | 0 | 0 | 0 | 0 | 0 | 0 | 0 | 0 | 0 |
| 1       | 2       | 1       | 0 | 0 | 0 | 0 | 0 | 0 | 0 | 0 | 0 | 0 | 0 | 0 | 0 |
| 1       | 3       | 1       | 0 | 0 | 0 | 0 | 0 | 0 | 0 | 0 | 0 | 0 | 0 | 0 | 0 |
| 1       | 4       | 1       | 0 | 0 | 0 | 0 | 0 | 0 | 0 | 0 | 0 | 0 | 0 | 0 | 0 |
| 1       | 5       | 1       | 0 | 0 | 0 | 0 | 0 | 0 | 0 | 0 | 0 | 0 | 0 | 0 | 0 |
| 5       | 6       | 1       | 0 | 0 | 0 | 0 | 0 | 0 | 0 | 0 | 0 | 0 | 0 | 0 | 0 |
| 5       | 7       | 1       | 0 | 0 | 0 | 0 | 0 | 0 | 0 | 0 | 0 | 0 | 0 | 0 | 0 |
| 5       | 8       | 1       | 0 | 0 | 0 | 0 | 0 | 0 | 0 | 0 | 0 | 0 | 0 | 0 | 0 |
| 8       | 9       | 1       | 0 | 0 | 0 | 0 | 0 | 0 | 0 | 0 | 0 | 0 | 0 | 0 | 0 |
| 8       | 17      | 1       | 0 | 0 | 0 | 0 | 0 | 0 | 0 | 0 | 0 | 0 | 0 | 0 | 0 |
| 9       | 10      | 1       | 0 | 0 | 0 | 0 | 0 | 0 | 0 | 0 | 0 | 0 | 0 | 0 | 0 |
| 9       | 11      | 1       | 0 | 0 | 0 | 0 | 0 | 0 | 0 | 0 | 0 | 0 | 0 | 0 | 0 |
| 9       | 12      | 1       | 0 | 0 | 0 | 0 | 0 | 0 | 0 | 0 | 0 | 0 | 0 | 0 | 0 |
| 12      | 13      | 1       | 0 | 0 | 0 | 0 | 0 | 0 | 0 | 0 | 0 | 0 | 0 | 0 | 0 |
| 12      | 14      | 1       | 0 | 0 | 0 | 0 | 0 | 0 | 0 | 0 | 0 | 0 | 0 | 0 | 0 |
| 12      | 15      | 1       | 0 | 0 | 0 | 0 | 0 | 0 | 0 | 0 | 0 | 0 | 0 | 0 | 0 |
| 15      | 16      | 1       | 0 | 0 | 0 | 0 | 0 | 0 | 0 | 0 | 0 | 0 | 0 | 0 | 0 |
| 15      | 39      | 1       | 0 | 0 | 0 | 0 | 0 | 0 | 0 | 0 | 0 | 0 | 0 | 0 | 0 |
| 17      | 18      | 1       | 0 | 0 | 0 | 0 | 0 | 0 | 0 | 0 | 0 | 0 | 0 | 0 | 0 |
| 17      | 19      | 1       | 0 | 0 | 0 | 0 | 0 | 0 | 0 | 0 | 0 | 0 | 0 | 0 | 0 |
| 17      | 20      | 1       | 0 | 0 | 0 | 0 | 0 | 0 | 0 | 0 | 0 | 0 | 0 | 0 | 0 |
| 20      | 21      | 1       | 0 | 0 | 0 | 0 | 0 | 0 | 0 | 0 | 0 | 0 | 0 | 0 | 0 |
| 20      | 22      | 1       | 0 | 0 | 0 | 0 | 0 | 0 | 0 | 0 | 0 | 0 | 0 | 0 | 0 |
| 20      | 23      | 1       | 0 | 0 | 0 | 0 | 0 | 0 | 0 | 0 | 0 | 0 | 0 | 0 | 0 |
| 24      | 25      | 1       | 0 | 0 | 0 | 0 | 0 | 0 | 0 | 0 | 0 | 0 | 0 | 0 | 0 |
| 24      | 26      | 1       | 0 | 0 | 0 | 0 | 0 | 0 | 0 | 0 | 0 | 0 | 0 | 0 | 0 |
| 24      | 27      | 1       | 0 | 0 | 0 | 0 | 0 | 0 | 0 | 0 | 0 | 0 | 0 | 0 | 0 |
| 24      | 71      | 1       | 0 | 0 | 0 | 0 | 0 | 0 | 0 | 0 | 0 | 0 | 0 | 0 | 0 |
| 27      | 28      | 1       | 0 | 0 | 0 | 0 | 0 | 0 | 0 | 0 | 0 | 0 | 0 | 0 | 0 |
| 28      | 29      | 1       | 0 | 0 | 0 | 0 | 0 | 0 | 0 | 0 | 0 | 0 | 0 | 0 | 0 |
| 28      | 35      | 2       | 0 | 0 | 0 | 0 | 0 | 0 | 0 | 0 | 0 | 0 | 0 | 0 | 0 |
| 29      | 30      | 1       | 0 | 0 | 0 | 0 | 0 | 0 | 0 | 0 | 0 | 0 | 0 | 0 | 0 |
| 29      | 31      | 1       | 0 | 0 | 0 | 0 | 0 | 0 | 0 | 0 | 0 | 0 | 0 | 0 | 0 |
| 29      | 32      | 1       | 0 | 0 | 0 | 0 | 0 | 0 | 0 | 0 | 0 | 0 | 0 | 0 | 0 |
| 32      | 33      | 1       | 0 | 0 | 0 | 0 | 0 | 0 | 0 | 0 | 0 | 0 | 0 | 0 | 0 |
| 32      | 34      | 1       | 0 | 0 | 0 | 0 | 0 | 0 | 0 | 0 | 0 | 0 | 0 | 0 | 0 |
| 32      | 88      | 1       | 0 | 0 | 0 | 0 | 0 | 0 | 0 | 0 | 0 | 0 | 0 | 0 | 0 |
| 36      | 37      | 1       | 0 | 0 | 0 | 0 | 0 | 0 | 0 | 0 | 0 | 0 | 0 | 0 | 0 |
| 36      | 38      | 1       | 0 | 0 | 0 | 0 | 0 | 0 | 0 | 0 | 0 | 0 | 0 | 0 | 0 |
| 36      | 46      | 1       | 0 | 0 | 0 | 0 | 0 | 0 | 0 | 0 | 0 | 0 | 0 | 0 | 0 |
| 36      | 48      | 1       | 0 | 0 | 0 | 0 | 0 | 0 | 0 | 0 | 0 | 0 | 0 | 0 | 0 |
| 39      | 40      | 1       | 0 | 0 | 0 | 0 | 0 | 0 | 0 | 0 | 0 | 0 | 0 | 0 | 0 |
| 39      | 41      | 1       | 0 | 0 | 0 | 0 | 0 | 0 | 0 | 0 | 0 | 0 | 0 | 0 | 0 |
| 39      | 42      | 1       | 0 | 0 | 0 | 0 | 0 | 0 | 0 | 0 | 0 | 0 | 0 | 0 | 0 |
| 42      | 43      | 1       | 0 | 0 | 0 | 0 | 0 | 0 | 0 | 0 | 0 | 0 | 0 | 0 | 0 |
| 42      | 44      | 1       | 0 | 0 | 0 | 0 | 0 | 0 | 0 | 0 | 0 | 0 | 0 | 0 | 0 |
| 42      | 45      | 1       | 0 | 0 | 0 | 0 | 0 | 0 | 0 | 0 | 0 | 0 | 0 | 0 | 0 |
| 45      | 46      | 1       | 0 | 0 | 0 | 0 | 0 | 0 | 0 | 0 | 0 | 0 | 0 | 0 | 0 |
| 45      | 47      | 2       | 0 | 0 | 0 | 0 | 0 | 0 | 0 | 0 | 0 | 0 | 0 | 0 | 0 |
| 48      | 49      | 1       | 0 | 0 | 0 | 0 | 0 | 0 | 0 | 0 | 0 | 0 | 0 | 0 | 0 |
| 48      | 50      | 1       | 0 | 0 | 0 | 0 | 0 | 0 | 0 | 0 | 0 | 0 | 0 | 0 | 0 |
| 48      | 51      | 1       | 0 | 0 | 0 | 0 | 0 | 0 | 0 | 0 | 0 | 0 | 0 | 0 | 0 |
| 51      | 52      | 1       | 0 | 0 | 0 | 0 | 0 | 0 | 0 | 0 | 0 | 0 | 0 | 0 | 0 |
| 52      | 53      | 1       | 0 | 0 | 0 | 0 | 0 | 0 | 0 | 0 | 0 | 0 | 0 | 0 | 0 |
| 52      | 54      | 1       | 0 | 0 | 0 | 0 | 0 | 0 | 0 | 0 | 0 | 0 | 0 | 0 | 0 |
| 52      | 55      | 1       | 0 | 0 | 0 | 0 | 0 | 0 | 0 | 0 | 0 | 0 | 0 | 0 | 0 |
| 55      | 56      | 1       | 0 | 0 | 0 | 0 | 0 | 0 | 0 | 0 | 0 | 0 | 0 | 0 | 0 |
| 55      | 57      | 1       | 0 | 0 | 0 | 0 | 0 | 0 | 0 | 0 | 0 | 0 | 0 | 0 | 0 |
| 55      | 58      | 1       | 0 | 0 | 0 | 0 | 0 | 0 | 0 | 0 | 0 | 0 | 0 | 0 | 0 |

|     |     |   |   |   |   |   |
|-----|-----|---|---|---|---|---|
| 58  | 59  | 1 | 0 | 0 | 0 | 0 |
| 58  | 60  | 1 | 0 | 0 | 0 | 0 |
| 58  | 61  | 1 | 0 | 0 | 0 | 0 |
| 61  | 62  | 1 | 0 | 0 | 0 | 0 |
| 61  | 63  | 1 | 0 | 0 | 0 | 0 |
| 61  | 64  | 1 | 0 | 0 | 0 | 0 |
| 64  | 65  | 1 | 0 | 0 | 0 | 0 |
| 64  | 66  | 1 | 0 | 0 | 0 | 0 |
| 64  | 67  | 1 | 0 | 0 | 0 | 0 |
| 67  | 68  | 1 | 0 | 0 | 0 | 0 |
| 67  | 69  | 1 | 0 | 0 | 0 | 0 |
| 67  | 70  | 1 | 0 | 0 | 0 | 0 |
| 70  | 71  | 1 | 0 | 0 | 0 | 0 |
| 71  | 72  | 1 | 0 | 0 | 0 | 0 |
| 71  | 73  | 1 | 0 | 0 | 0 | 0 |
| 74  | 75  | 1 | 0 | 0 | 0 | 0 |
| 74  | 76  | 1 | 0 | 0 | 0 | 0 |
| 74  | 77  | 1 | 0 | 0 | 0 | 0 |
| 74  | 78  | 1 | 0 | 0 | 0 | 0 |
| 78  | 79  | 1 | 0 | 0 | 0 | 0 |
| 78  | 80  | 1 | 0 | 0 | 0 | 0 |
| 78  | 81  | 1 | 0 | 0 | 0 | 0 |
| 81  | 82  | 1 | 0 | 0 | 0 | 0 |
| 81  | 89  | 1 | 0 | 0 | 0 | 0 |
| 82  | 83  | 1 | 0 | 0 | 0 | 0 |
| 82  | 84  | 1 | 0 | 0 | 0 | 0 |
| 82  | 85  | 1 | 0 | 0 | 0 | 0 |
| 85  | 86  | 1 | 0 | 0 | 0 | 0 |
| 85  | 87  | 1 | 0 | 0 | 0 | 0 |
| 85  | 88  | 1 | 0 | 0 | 0 | 0 |
| 88  | 111 | 1 | 0 | 0 | 0 | 0 |
| 89  | 90  | 1 | 0 | 0 | 0 | 0 |
| 89  | 91  | 1 | 0 | 0 | 0 | 0 |
| 89  | 92  | 1 | 0 | 0 | 0 | 0 |
| 92  | 93  | 1 | 0 | 0 | 0 | 0 |
| 92  | 94  | 1 | 0 | 0 | 0 | 0 |
| 92  | 95  | 1 | 0 | 0 | 0 | 0 |
| 96  | 97  | 1 | 0 | 0 | 0 | 0 |
| 96  | 98  | 1 | 0 | 0 | 0 | 0 |
| 96  | 99  | 1 | 0 | 0 | 0 | 0 |
| 96  | 143 | 1 | 0 | 0 | 0 | 0 |
| 99  | 100 | 1 | 0 | 0 | 0 | 0 |
| 100 | 101 | 1 | 0 | 0 | 0 | 0 |
| 100 | 107 | 2 | 0 | 0 | 0 | 0 |
| 101 | 102 | 1 | 0 | 0 | 0 | 0 |
| 101 | 103 | 1 | 0 | 0 | 0 | 0 |
| 101 | 104 | 1 | 0 | 0 | 0 | 0 |
| 104 | 105 | 1 | 0 | 0 | 0 | 0 |
| 104 | 106 | 1 | 0 | 0 | 0 | 0 |
| 104 | 160 | 1 | 0 | 0 | 0 | 0 |
| 108 | 109 | 1 | 0 | 0 | 0 | 0 |
| 108 | 110 | 1 | 0 | 0 | 0 | 0 |
| 108 | 118 | 1 | 0 | 0 | 0 | 0 |
| 108 | 120 | 1 | 0 | 0 | 0 | 0 |
| 111 | 112 | 1 | 0 | 0 | 0 | 0 |
| 111 | 113 | 1 | 0 | 0 | 0 | 0 |
| 111 | 114 | 1 | 0 | 0 | 0 | 0 |
| 114 | 115 | 1 | 0 | 0 | 0 | 0 |
| 114 | 116 | 1 | 0 | 0 | 0 | 0 |
| 114 | 117 | 1 | 0 | 0 | 0 | 0 |
| 117 | 118 | 1 | 0 | 0 | 0 | 0 |
| 117 | 119 | 2 | 0 | 0 | 0 | 0 |
| 120 | 121 | 1 | 0 | 0 | 0 | 0 |
| 120 | 122 | 1 | 0 | 0 | 0 | 0 |
| 120 | 123 | 1 | 0 | 0 | 0 | 0 |
| 123 | 124 | 1 | 0 | 0 | 0 | 0 |
| 124 | 125 | 1 | 0 | 0 | 0 | 0 |
| 124 | 126 | 1 | 0 | 0 | 0 | 0 |
| 124 | 127 | 1 | 0 | 0 | 0 | 0 |
| 127 | 128 | 1 | 0 | 0 | 0 | 0 |
| 127 | 129 | 1 | 0 | 0 | 0 | 0 |
| 127 | 130 | 1 | 0 | 0 | 0 | 0 |
| 130 | 131 | 1 | 0 | 0 | 0 | 0 |
| 130 | 132 | 1 | 0 | 0 | 0 | 0 |
| 130 | 133 | 1 | 0 | 0 | 0 | 0 |
| 133 | 134 | 1 | 0 | 0 | 0 | 0 |
| 133 | 135 | 1 | 0 | 0 | 0 | 0 |
| 133 | 136 | 1 | 0 | 0 | 0 | 0 |
| 136 | 137 | 1 | 0 | 0 | 0 | 0 |
| 136 | 138 | 1 | 0 | 0 | 0 | 0 |
| 136 | 139 | 1 | 0 | 0 | 0 | 0 |

|        |   |   |   |   |   |
|--------|---|---|---|---|---|
| 139140 | 1 | 0 | 0 | 0 | 0 |
| 139141 | 1 | 0 | 0 | 0 | 0 |
| 139142 | 1 | 0 | 0 | 0 | 0 |
| 142143 | 1 | 0 | 0 | 0 | 0 |
| 143144 | 1 | 0 | 0 | 0 | 0 |
| 143145 | 1 | 0 | 0 | 0 | 0 |
| 146147 | 1 | 0 | 0 | 0 | 0 |
| 146148 | 1 | 0 | 0 | 0 | 0 |
| 146149 | 1 | 0 | 0 | 0 | 0 |
| 146150 | 1 | 0 | 0 | 0 | 0 |
| 150151 | 1 | 0 | 0 | 0 | 0 |
| 150152 | 1 | 0 | 0 | 0 | 0 |
| 150153 | 1 | 0 | 0 | 0 | 0 |
| 153154 | 1 | 0 | 0 | 0 | 0 |
| 153161 | 1 | 0 | 0 | 0 | 0 |
| 154155 | 1 | 0 | 0 | 0 | 0 |
| 154156 | 1 | 0 | 0 | 0 | 0 |
| 154157 | 1 | 0 | 0 | 0 | 0 |
| 157158 | 1 | 0 | 0 | 0 | 0 |
| 157159 | 1 | 0 | 0 | 0 | 0 |
| 157160 | 1 | 0 | 0 | 0 | 0 |
| 160183 | 1 | 0 | 0 | 0 | 0 |
| 161162 | 1 | 0 | 0 | 0 | 0 |
| 161163 | 1 | 0 | 0 | 0 | 0 |
| 161164 | 1 | 0 | 0 | 0 | 0 |
| 164165 | 1 | 0 | 0 | 0 | 0 |
| 164166 | 1 | 0 | 0 | 0 | 0 |
| 164167 | 1 | 0 | 0 | 0 | 0 |
| 168169 | 1 | 0 | 0 | 0 | 0 |
| 168170 | 1 | 0 | 0 | 0 | 0 |
| 168171 | 1 | 0 | 0 | 0 | 0 |
| 168215 | 1 | 0 | 0 | 0 | 0 |
| 171172 | 1 | 0 | 0 | 0 | 0 |
| 172173 | 1 | 0 | 0 | 0 | 0 |
| 172179 | 2 | 0 | 0 | 0 | 0 |
| 173174 | 1 | 0 | 0 | 0 | 0 |
| 173175 | 1 | 0 | 0 | 0 | 0 |
| 173176 | 1 | 0 | 0 | 0 | 0 |
| 176177 | 1 | 0 | 0 | 0 | 0 |
| 176178 | 1 | 0 | 0 | 0 | 0 |
| 176232 | 1 | 0 | 0 | 0 | 0 |
| 180181 | 1 | 0 | 0 | 0 | 0 |
| 180182 | 1 | 0 | 0 | 0 | 0 |
| 180190 | 1 | 0 | 0 | 0 | 0 |
| 180192 | 1 | 0 | 0 | 0 | 0 |
| 183184 | 1 | 0 | 0 | 0 | 0 |
| 183185 | 1 | 0 | 0 | 0 | 0 |
| 183186 | 1 | 0 | 0 | 0 | 0 |
| 186187 | 1 | 0 | 0 | 0 | 0 |
| 186188 | 1 | 0 | 0 | 0 | 0 |
| 186189 | 1 | 0 | 0 | 0 | 0 |
| 189190 | 1 | 0 | 0 | 0 | 0 |
| 189191 | 2 | 0 | 0 | 0 | 0 |
| 192193 | 1 | 0 | 0 | 0 | 0 |
| 192194 | 1 | 0 | 0 | 0 | 0 |
| 192195 | 1 | 0 | 0 | 0 | 0 |
| 195196 | 1 | 0 | 0 | 0 | 0 |
| 196197 | 1 | 0 | 0 | 0 | 0 |
| 196198 | 1 | 0 | 0 | 0 | 0 |
| 196199 | 1 | 0 | 0 | 0 | 0 |
| 199200 | 1 | 0 | 0 | 0 | 0 |
| 199201 | 1 | 0 | 0 | 0 | 0 |
| 199202 | 1 | 0 | 0 | 0 | 0 |
| 202203 | 1 | 0 | 0 | 0 | 0 |
| 202204 | 1 | 0 | 0 | 0 | 0 |
| 202205 | 1 | 0 | 0 | 0 | 0 |
| 205206 | 1 | 0 | 0 | 0 | 0 |
| 205207 | 1 | 0 | 0 | 0 | 0 |
| 205208 | 1 | 0 | 0 | 0 | 0 |
| 208209 | 1 | 0 | 0 | 0 | 0 |
| 208210 | 1 | 0 | 0 | 0 | 0 |
| 208211 | 1 | 0 | 0 | 0 | 0 |
| 211212 | 1 | 0 | 0 | 0 | 0 |
| 211213 | 1 | 0 | 0 | 0 | 0 |
| 211214 | 1 | 0 | 0 | 0 | 0 |
| 214215 | 1 | 0 | 0 | 0 | 0 |
| 215216 | 1 | 0 | 0 | 0 | 0 |
| 215217 | 1 | 0 | 0 | 0 | 0 |
| 218219 | 1 | 0 | 0 | 0 | 0 |
| 218220 | 1 | 0 | 0 | 0 | 0 |
| 218221 | 1 | 0 | 0 | 0 | 0 |

|        |   |   |   |   |   |
|--------|---|---|---|---|---|
| 218222 | 1 | 0 | 0 | 0 | 0 |
| 222223 | 1 | 0 | 0 | 0 | 0 |
| 222224 | 1 | 0 | 0 | 0 | 0 |
| 222225 | 1 | 0 | 0 | 0 | 0 |
| 225226 | 1 | 0 | 0 | 0 | 0 |
| 225233 | 1 | 0 | 0 | 0 | 0 |
| 226227 | 1 | 0 | 0 | 0 | 0 |
| 226228 | 1 | 0 | 0 | 0 | 0 |
| 226229 | 1 | 0 | 0 | 0 | 0 |
| 229230 | 1 | 0 | 0 | 0 | 0 |
| 229231 | 1 | 0 | 0 | 0 | 0 |
| 229232 | 1 | 0 | 0 | 0 | 0 |
| 232255 | 1 | 0 | 0 | 0 | 0 |
| 233234 | 1 | 0 | 0 | 0 | 0 |
| 233235 | 1 | 0 | 0 | 0 | 0 |
| 233236 | 1 | 0 | 0 | 0 | 0 |
| 236237 | 1 | 0 | 0 | 0 | 0 |
| 236238 | 1 | 0 | 0 | 0 | 0 |
| 236239 | 1 | 0 | 0 | 0 | 0 |
| 240241 | 1 | 0 | 0 | 0 | 0 |
| 240242 | 1 | 0 | 0 | 0 | 0 |
| 240243 | 1 | 0 | 0 | 0 | 0 |
| 240287 | 1 | 0 | 0 | 0 | 0 |
| 243244 | 1 | 0 | 0 | 0 | 0 |
| 244245 | 1 | 0 | 0 | 0 | 0 |
| 244251 | 2 | 0 | 0 | 0 | 0 |
| 245246 | 1 | 0 | 0 | 0 | 0 |
| 245247 | 1 | 0 | 0 | 0 | 0 |
| 245248 | 1 | 0 | 0 | 0 | 0 |
| 248249 | 1 | 0 | 0 | 0 | 0 |
| 248250 | 1 | 0 | 0 | 0 | 0 |
| 248304 | 1 | 0 | 0 | 0 | 0 |
| 252253 | 1 | 0 | 0 | 0 | 0 |
| 252254 | 1 | 0 | 0 | 0 | 0 |
| 252262 | 1 | 0 | 0 | 0 | 0 |
| 252264 | 1 | 0 | 0 | 0 | 0 |
| 255256 | 1 | 0 | 0 | 0 | 0 |
| 255257 | 1 | 0 | 0 | 0 | 0 |
| 255258 | 1 | 0 | 0 | 0 | 0 |
| 258259 | 1 | 0 | 0 | 0 | 0 |
| 258260 | 1 | 0 | 0 | 0 | 0 |
| 258261 | 1 | 0 | 0 | 0 | 0 |
| 261262 | 1 | 0 | 0 | 0 | 0 |
| 261263 | 2 | 0 | 0 | 0 | 0 |
| 264265 | 1 | 0 | 0 | 0 | 0 |
| 264266 | 1 | 0 | 0 | 0 | 0 |
| 264267 | 1 | 0 | 0 | 0 | 0 |
| 267268 | 1 | 0 | 0 | 0 | 0 |
| 268269 | 1 | 0 | 0 | 0 | 0 |
| 268270 | 1 | 0 | 0 | 0 | 0 |
| 268271 | 1 | 0 | 0 | 0 | 0 |
| 271272 | 1 | 0 | 0 | 0 | 0 |
| 271273 | 1 | 0 | 0 | 0 | 0 |
| 271274 | 1 | 0 | 0 | 0 | 0 |
| 274275 | 1 | 0 | 0 | 0 | 0 |
| 274276 | 1 | 0 | 0 | 0 | 0 |
| 274277 | 1 | 0 | 0 | 0 | 0 |
| 277278 | 1 | 0 | 0 | 0 | 0 |
| 277279 | 1 | 0 | 0 | 0 | 0 |
| 277280 | 1 | 0 | 0 | 0 | 0 |
| 280281 | 1 | 0 | 0 | 0 | 0 |
| 280282 | 1 | 0 | 0 | 0 | 0 |
| 280283 | 1 | 0 | 0 | 0 | 0 |
| 283284 | 1 | 0 | 0 | 0 | 0 |
| 283285 | 1 | 0 | 0 | 0 | 0 |
| 283286 | 1 | 0 | 0 | 0 | 0 |
| 286287 | 1 | 0 | 0 | 0 | 0 |
| 287288 | 1 | 0 | 0 | 0 | 0 |
| 287289 | 1 | 0 | 0 | 0 | 0 |
| 290291 | 1 | 0 | 0 | 0 | 0 |
| 290292 | 1 | 0 | 0 | 0 | 0 |
| 290293 | 1 | 0 | 0 | 0 | 0 |
| 290294 | 1 | 0 | 0 | 0 | 0 |
| 294295 | 1 | 0 | 0 | 0 | 0 |
| 294296 | 1 | 0 | 0 | 0 | 0 |
| 294297 | 1 | 0 | 0 | 0 | 0 |
| 297298 | 1 | 0 | 0 | 0 | 0 |
| 297305 | 1 | 0 | 0 | 0 | 0 |
| 298299 | 1 | 0 | 0 | 0 | 0 |
| 298300 | 1 | 0 | 0 | 0 | 0 |
| 298301 | 1 | 0 | 0 | 0 | 0 |

```

301302 1 0 0 0 0
301303 1 0 0 0 0
301304 1 0 0 0 0
304328 1 0 0 0 0
305306 1 0 0 0 0
305307 1 0 0 0 0
305308 1 0 0 0 0
308309 1 0 0 0 0
308310 1 0 0 0 0
308311 1 0 0 0 0
312313 1 0 0 0 0
312314 1 0 0 0 0
312315 1 0 0 0 0
312360 1 0 0 0 0
315316 1 0 0 0 0
316317 1 0 0 0 0
316324 2 0 0 0 0
317318 1 0 0 0 0
317319 1 0 0 0 0
317320 1 0 0 0 0
320321 1 0 0 0 0
320322 1 0 0 0 0
320323 1 0 0 0 0
325326 1 0 0 0 0
325327 1 0 0 0 0
325335 1 0 0 0 0
325337 1 0 0 0 0
328329 1 0 0 0 0
328330 1 0 0 0 0
328331 1 0 0 0 0
331332 1 0 0 0 0
331333 1 0 0 0 0
331334 1 0 0 0 0
334335 1 0 0 0 0
334336 2 0 0 0 0
337338 1 0 0 0 0
337339 1 0 0 0 0
337340 1 0 0 0 0
340341 1 0 0 0 0
341342 1 0 0 0 0
341343 1 0 0 0 0
341344 1 0 0 0 0
344345 1 0 0 0 0
344346 1 0 0 0 0
344347 1 0 0 0 0
347348 1 0 0 0 0
347349 1 0 0 0 0
347350 1 0 0 0 0
350351 1 0 0 0 0
350352 1 0 0 0 0
350353 1 0 0 0 0
353354 1 0 0 0 0
353355 1 0 0 0 0
353356 1 0 0 0 0
356357 1 0 0 0 0
356358 1 0 0 0 0
356359 1 0 0 0 0
359360 1 0 0 0 0
360361 1 0 0 0 0
360362 1 0 0 0 0

```

```

M END
> <NAME>
U75_1

```

```

$$$$
U80_1
MOE2012 3D

```

```

347346 0 0 1 0 0 0 0 0999 V2000
24.5790 -16.9610 -17.4080 C 0 0 0 0 0 0 0 0 0 0 0 0 0 0 0
25.3270 -17.3050 -18.1330 H 0 0 0 0 0 0 0 0 0 0 0 0 0 0 0
23.8440 -16.3440 -17.9370 H 0 0 0 0 0 0 0 0 0 0 0 0 0 0 0
24.0740 -17.8590 -17.0350 H 0 0 0 0 0 0 0 0 0 0 0 0 0 0 0
25.2220 -16.2350 -16.3090 N 0 0 0 0 0 0 0 0 0 0 0 0 0 0 0
24.2120 -15.8330 -15.3150 C 0 0 0 0 0 0 0 0 0 0 0 0 0 0 0
23.5270 -15.0820 -15.7310 H 0 0 0 0 0 0 0 0 0 0 0 0 0 0 0
23.6040 -16.7110 -15.0580 H 0 0 0 0 0 0 0 0 0 0 0 0 0 0 0
24.8400 -15.3120 -14.0160 C 0 0 0 0 0 0 0 0 0 0 0 0 0 0 0
25.5900 -16.0300 -13.6650 H 0 0 0 0 0 0 0 0 0 0 0 0 0 0 0
25.3620 -14.3650 -14.1980 H 0 0 0 0 0 0 0 0 0 0 0 0 0 0 0
23.7690 -15.0900 -12.9420 C 0 0 0 0 0 0 0 0 0 0 0 0 0 0 0

```



|         |          |         |   |   |   |   |   |   |   |   |   |   |   |   |   |   |
|---------|----------|---------|---|---|---|---|---|---|---|---|---|---|---|---|---|---|
| 40.1080 | 5.0460   | -0.2900 | C | 0 | 0 | 0 | 0 | 0 | 0 | 0 | 0 | 0 | 0 | 0 | 0 | 0 |
| 38.9580 | 5.9930   | -0.0890 | C | 0 | 0 | 0 | 0 | 0 | 0 | 0 | 0 | 0 | 0 | 0 | 0 | 0 |
| 39.1470 | 6.8880   | -0.6890 | H | 0 | 0 | 0 | 0 | 0 | 0 | 0 | 0 | 0 | 0 | 0 | 0 | 0 |
| 38.0340 | 5.5310   | -0.4580 | H | 0 | 0 | 0 | 0 | 0 | 0 | 0 | 0 | 0 | 0 | 0 | 0 | 0 |
| 38.8300 | 6.3030   | 1.3990  | C | 0 | 0 | 0 | 0 | 0 | 0 | 0 | 0 | 0 | 0 | 0 | 0 | 0 |
| 39.7190 | 6.8340   | 1.7580  | H | 0 | 0 | 0 | 0 | 0 | 0 | 0 | 0 | 0 | 0 | 0 | 0 | 0 |
| 38.8400 | 5.3480   | 1.9400  | H | 0 | 0 | 0 | 0 | 0 | 0 | 0 | 0 | 0 | 0 | 0 | 0 | 0 |
| 41.2370 | 5.2330   | 0.1430  | O | 0 | 0 | 0 | 0 | 0 | 0 | 0 | 0 | 0 | 0 | 0 | 0 | 0 |
| 43.2850 | -7.3630  | -7.0950 | C | 0 | 0 | 0 | 0 | 0 | 0 | 0 | 0 | 0 | 0 | 0 | 0 | 0 |
| 44.2550 | -7.8070  | -7.3520 | H | 0 | 0 | 0 | 0 | 0 | 0 | 0 | 0 | 0 | 0 | 0 | 0 | 0 |
| 42.8730 | -6.9810  | -8.0360 | H | 0 | 0 | 0 | 0 | 0 | 0 | 0 | 0 | 0 | 0 | 0 | 0 | 0 |
| 42.3620 | -11.2720 | -4.3230 | C | 0 | 0 | 0 | 0 | 0 | 0 | 0 | 0 | 0 | 0 | 0 | 0 | 0 |
| 42.8130 | -10.7590 | -3.4640 | H | 0 | 0 | 0 | 0 | 0 | 0 | 0 | 0 | 0 | 0 | 0 | 0 | 0 |
| 43.2100 | -11.7990 | -4.7800 | H | 0 | 0 | 0 | 0 | 0 | 0 | 0 | 0 | 0 | 0 | 0 | 0 | 0 |
| 41.8210 | -10.2380 | -5.3160 | C | 0 | 0 | 0 | 0 | 0 | 0 | 0 | 0 | 0 | 0 | 0 | 0 | 0 |
| 41.4570 | -10.7330 | -6.2230 | H | 0 | 0 | 0 | 0 | 0 | 0 | 0 | 0 | 0 | 0 | 0 | 0 | 0 |
| 41.0070 | -9.6600  | -4.8670 | H | 0 | 0 | 0 | 0 | 0 | 0 | 0 | 0 | 0 | 0 | 0 | 0 | 0 |
| 42.8980 | -9.2610  | -5.7240 | C | 0 | 0 | 0 | 0 | 0 | 0 | 0 | 0 | 0 | 0 | 0 | 0 | 0 |
| 42.3740 | -8.3570  | -6.6010 | O | 0 | 0 | 0 | 0 | 0 | 0 | 0 | 0 | 0 | 0 | 0 | 0 | 0 |
| 44.0540 | -9.2700  | -5.3250 | O | 0 | 0 | 0 | 0 | 0 | 0 | 0 | 0 | 0 | 0 | 0 | 0 | 0 |
| 43.4400 | -6.2200  | -6.0990 | C | 0 | 0 | 0 | 0 | 0 | 0 | 0 | 0 | 0 | 0 | 0 | 0 | 0 |
| 42.4550 | -5.7980  | -5.8740 | H | 0 | 0 | 0 | 0 | 0 | 0 | 0 | 0 | 0 | 0 | 0 | 0 | 0 |
| 43.8660 | -6.5900  | -5.1600 | H | 0 | 0 | 0 | 0 | 0 | 0 | 0 | 0 | 0 | 0 | 0 | 0 | 0 |
| 44.2890 | -5.2290  | -6.6690 | O | 0 | 0 | 0 | 0 | 0 | 0 | 0 | 0 | 0 | 0 | 0 | 0 | 0 |
| 44.6320 | -4.1850  | -5.7560 | C | 0 | 0 | 0 | 0 | 0 | 0 | 0 | 0 | 0 | 0 | 0 | 0 | 0 |
| 44.9620 | -4.6080  | -4.8000 | H | 0 | 0 | 0 | 0 | 0 | 0 | 0 | 0 | 0 | 0 | 0 | 0 | 0 |
| 45.4910 | -3.6630  | -6.1910 | H | 0 | 0 | 0 | 0 | 0 | 0 | 0 | 0 | 0 | 0 | 0 | 0 | 0 |
| 43.4830 | -3.1940  | -5.5650 | C | 0 | 0 | 0 | 0 | 0 | 0 | 0 | 0 | 0 | 0 | 0 | 0 | 0 |
| 43.1320 | -2.8540  | -6.5470 | H | 0 | 0 | 0 | 0 | 0 | 0 | 0 | 0 | 0 | 0 | 0 | 0 | 0 |
| 42.6300 | -3.6950  | -5.0950 | H | 0 | 0 | 0 | 0 | 0 | 0 | 0 | 0 | 0 | 0 | 0 | 0 | 0 |
| 43.9070 | -1.9980  | -4.7100 | C | 0 | 0 | 0 | 0 | 0 | 0 | 0 | 0 | 0 | 0 | 0 | 0 | 0 |
| 44.2590 | -2.3520  | -3.7340 | H | 0 | 0 | 0 | 0 | 0 | 0 | 0 | 0 | 0 | 0 | 0 | 0 | 0 |
| 44.7490 | -1.4840  | -5.1910 | H | 0 | 0 | 0 | 0 | 0 | 0 | 0 | 0 | 0 | 0 | 0 | 0 | 0 |
| 42.7530 | -1.0120  | -4.5110 | C | 0 | 0 | 0 | 0 | 0 | 0 | 0 | 0 | 0 | 0 | 0 | 0 | 0 |
| 42.3940 | -0.6650  | -5.4880 | H | 0 | 0 | 0 | 0 | 0 | 0 | 0 | 0 | 0 | 0 | 0 | 0 | 0 |
| 41.9150 | -1.5220  | -4.0210 | H | 0 | 0 | 0 | 0 | 0 | 0 | 0 | 0 | 0 | 0 | 0 | 0 | 0 |
| 43.1830 | 0.1900   | -3.6700 | C | 0 | 0 | 0 | 0 | 0 | 0 | 0 | 0 | 0 | 0 | 0 | 0 | 0 |
| 43.5530 | -0.1440  | -2.6930 | H | 0 | 0 | 0 | 0 | 0 | 0 | 0 | 0 | 0 | 0 | 0 | 0 | 0 |
| 44.0260 | 0.7040   | -4.1490 | H | 0 | 0 | 0 | 0 | 0 | 0 | 0 | 0 | 0 | 0 | 0 | 0 | 0 |
| 42.0410 | 1.1810   | -3.4630 | C | 0 | 0 | 0 | 0 | 0 | 0 | 0 | 0 | 0 | 0 | 0 | 0 | 0 |
| 41.6820 | 1.5480   | -4.4320 | H | 0 | 0 | 0 | 0 | 0 | 0 | 0 | 0 | 0 | 0 | 0 | 0 | 0 |
| 41.2130 | 0.6940   | -2.9360 | H | 0 | 0 | 0 | 0 | 0 | 0 | 0 | 0 | 0 | 0 | 0 | 0 | 0 |
| 42.5350 | 2.2760   | -2.6940 | O | 0 | 0 | 0 | 0 | 0 | 0 | 0 | 0 | 0 | 0 | 0 | 0 | 0 |
| 41.5570 | 3.2850   | -2.4560 | C | 0 | 0 | 0 | 0 | 0 | 0 | 0 | 0 | 0 | 0 | 0 | 0 | 0 |
| 40.9390 | 3.4590   | -3.3460 | H | 0 | 0 | 0 | 0 | 0 | 0 | 0 | 0 | 0 | 0 | 0 | 0 | 0 |
| 42.0950 | 4.2210   | -2.2750 | H | 0 | 0 | 0 | 0 | 0 | 0 | 0 | 0 | 0 | 0 | 0 | 0 | 0 |
| 36.9170 | 2.5990   | 1.8940  | C | 0 | 0 | 0 | 0 | 0 | 0 | 0 | 0 | 0 | 0 | 0 | 0 | 0 |
| 36.1540 | 1.9600   | 2.3520  | H | 0 | 0 | 0 | 0 | 0 | 0 | 0 | 0 | 0 | 0 | 0 | 0 | 0 |
| 37.8550 | 2.4710   | 2.4470  | H | 0 | 0 | 0 | 0 | 0 | 0 | 0 | 0 | 0 | 0 | 0 | 0 | 0 |
| 37.1060 | 2.2380   | 0.8770  | H | 0 | 0 | 0 | 0 | 0 | 0 | 0 | 0 | 0 | 0 | 0 | 0 | 0 |
| 36.5190 | 4.0080   | 1.8740  | N | 0 | 0 | 0 | 0 | 0 | 0 | 0 | 0 | 0 | 0 | 0 | 0 | 0 |
| 36.3490 | 4.5110   | 3.2470  | C | 0 | 0 | 0 | 0 | 0 | 0 | 0 | 0 | 0 | 0 | 0 | 0 | 0 |
| 35.5270 | 3.9670   | 3.7320  | H | 0 | 0 | 0 | 0 | 0 | 0 | 0 | 0 | 0 | 0 | 0 | 0 | 0 |
| 37.2520 | 4.2810   | 3.8270  | H | 0 | 0 | 0 | 0 | 0 | 0 | 0 | 0 | 0 | 0 | 0 | 0 | 0 |
| 36.0790 | 6.0190   | 3.4120  | C | 0 | 0 | 0 | 0 | 0 | 0 | 0 | 0 | 0 | 0 | 0 | 0 | 0 |
| 35.2060 | 6.3290   | 2.8270  | H | 0 | 0 | 0 | 0 | 0 | 0 | 0 | 0 | 0 | 0 | 0 | 0 | 0 |
| 35.7890 | 6.1740   | 4.4600  | H | 0 | 0 | 0 | 0 | 0 | 0 | 0 | 0 | 0 | 0 | 0 | 0 | 0 |
| 37.2600 | 6.9640   | 3.1350  | C | 0 | 0 | 0 | 0 | 0 | 0 | 0 | 0 | 0 | 0 | 0 | 0 | 0 |
| 36.9610 | 7.9490   | 3.5150  | H | 0 | 0 | 0 | 0 | 0 | 0 | 0 | 0 | 0 | 0 | 0 | 0 | 0 |
| 38.1230 | 6.6730   | 3.7490  | H | 0 | 0 | 0 | 0 | 0 | 0 | 0 | 0 | 0 | 0 | 0 | 0 | 0 |
| 35.3140 | 4.1770   | 1.0640  | C | 0 | 0 | 0 | 0 | 0 | 0 | 0 | 0 | 0 | 0 | 0 | 0 | 0 |
| 34.4440 | 3.6820   | 1.5090  | H | 0 | 0 | 0 | 0 | 0 | 0 | 0 | 0 | 0 | 0 | 0 | 0 | 0 |
| 35.4650 | 3.7640   | 0.0590  | H | 0 | 0 | 0 | 0 | 0 | 0 | 0 | 0 | 0 | 0 | 0 | 0 | 0 |
| 35.0770 | 5.2350   | 0.9170  | H | 0 | 0 | 0 | 0 | 0 | 0 | 0 | 0 | 0 | 0 | 0 | 0 | 0 |
| 37.6030 | 7.0410   | 1.7130  | N | 0 | 0 | 3 | 0 | 0 | 0 | 0 | 0 | 0 | 0 | 0 | 0 | 0 |
| 51.9560 | 11.5170  | 4.3740  | C | 0 | 0 | 0 | 0 | 0 | 0 | 0 | 0 | 0 | 0 | 0 | 0 | 0 |
| 51.8670 | 12.4570  | 3.8150  | H | 0 | 0 | 0 | 0 | 0 | 0 | 0 | 0 | 0 | 0 | 0 | 0 | 0 |
| 51.2880 | 10.8080  | 3.8750  | H | 0 | 0 | 0 | 0 | 0 | 0 | 0 | 0 | 0 | 0 | 0 | 0 | 0 |
| 53.2820 | 10.9720  | 4.2830  | O | 0 | 0 | 0 | 0 | 0 | 0 | 0 | 0 | 0 | 0 | 0 | 0 | 0 |
| 54.3030 | 11.8740  | 4.2960  | C | 0 | 0 | 0 | 0 | 0 | 0 | 0 | 0 | 0 | 0 | 0 | 0 | 0 |
| 55.6320 | 11.1660  | 4.2130  | C | 0 | 0 | 0 | 0 | 0 | 0 | 0 | 0 | 0 | 0 | 0 | 0 | 0 |
| 55.5030 | 10.2180  | 3.6770  | H | 0 | 0 | 0 | 0 | 0 | 0 | 0 | 0 | 0 | 0 | 0 | 0 | 0 |
| 56.3030 | 11.7810  | 3.6040  | H | 0 | 0 | 0 | 0 | 0 | 0 | 0 | 0 | 0 | 0 | 0 | 0 | 0 |
| 56.1720 | 10.9370  | 5.6230  | C | 0 | 0 | 0 | 0 | 0 | 0 | 0 | 0 | 0 | 0 | 0 | 0 | 0 |
| 55.3800 | 10.4370  | 6.1930  | H | 0 | 0 | 0 | 0 | 0 | 0 | 0 | 0 | 0 | 0 | 0 | 0 | 0 |
| 56.3350 | 11.8940  | 6.1380  | H | 0 | 0 | 0 | 0 | 0 | 0 | 0 | 0 | 0 | 0 | 0 | 0 | 0 |
| 54.1820 | 13.0860  | 4.4060  | O | 0 | 0 | 0 | 0 | 0 | 0 | 0 | 0 | 0 | 0 | 0 | 0 | 0 |
| 40.1930 | 9.3770   | 4.6700  | C | 0 | 0 | 0 | 0 | 0 | 0 | 0 | 0 | 0 | 0 | 0 | 0 | 0 |
| 39.3210 | 9.7280   | 5.2350  | H | 0 | 0 | 0 | 0 | 0 | 0 | 0 | 0 | 0 | 0 | 0 | 0 | 0 |
| 40.5180 | 8.4530   | 5.1620  | H | 0 | 0 | 0 | 0 | 0 | 0 | 0 | 0 | 0 | 0 | 0 | 0 | 0 |
| 37.5000 | 8.3860   | 1.1360  | C | 0 | 0 | 0 | 0 | 0 | 0 | 0 | 0 | 0 | 0 | 0 | 0 | 0 |

|         |         |         |   |   |   |   |   |   |   |   |   |   |   |   |   |   |   |   |   |
|---------|---------|---------|---|---|---|---|---|---|---|---|---|---|---|---|---|---|---|---|---|
| 37.3290 | 8.2670  | 0.0580  | H | 0 | 0 | 0 | 0 | 0 | 0 | 0 | 0 | 0 | 0 | 0 | 0 | 0 | 0 | 0 | 0 |
| 36.5820 | 8.8680  | 1.5000  | H | 0 | 0 | 0 | 0 | 0 | 0 | 0 | 0 | 0 | 0 | 0 | 0 | 0 | 0 | 0 | 0 |
| 38.6790 | 9.3430  | 1.3050  | C | 0 | 0 | 0 | 0 | 0 | 0 | 0 | 0 | 0 | 0 | 0 | 0 | 0 | 0 | 0 | 0 |
| 39.6120 | 8.9300  | 0.9050  | H | 0 | 0 | 0 | 0 | 0 | 0 | 0 | 0 | 0 | 0 | 0 | 0 | 0 | 0 | 0 | 0 |
| 38.4970 | 10.2510 | 0.7160  | H | 0 | 0 | 0 | 0 | 0 | 0 | 0 | 0 | 0 | 0 | 0 | 0 | 0 | 0 | 0 | 0 |
| 38.8780 | 9.7840  | 2.7290  | C | 0 | 0 | 0 | 0 | 0 | 0 | 0 | 0 | 0 | 0 | 0 | 0 | 0 | 0 | 0 | 0 |
| 39.8610 | 9.0470  | 3.3140  | O | 0 | 0 | 0 | 0 | 0 | 0 | 0 | 0 | 0 | 0 | 0 | 0 | 0 | 0 | 0 | 0 |
| 38.2390 | 10.6770 | 3.2650  | O | 0 | 0 | 0 | 0 | 0 | 0 | 0 | 0 | 0 | 0 | 0 | 0 | 0 | 0 | 0 | 0 |
| 41.3200 | 10.3990 | 4.6880  | C | 0 | 0 | 0 | 0 | 0 | 0 | 0 | 0 | 0 | 0 | 0 | 0 | 0 | 0 | 0 | 0 |
| 42.1540 | 10.0320 | 4.0800  | H | 0 | 0 | 0 | 0 | 0 | 0 | 0 | 0 | 0 | 0 | 0 | 0 | 0 | 0 | 0 | 0 |
| 40.9780 | 11.3420 | 4.2480  | H | 0 | 0 | 0 | 0 | 0 | 0 | 0 | 0 | 0 | 0 | 0 | 0 | 0 | 0 | 0 | 0 |
| 41.7330 | 10.6140 | 6.0350  | O | 0 | 0 | 0 | 0 | 0 | 0 | 0 | 0 | 0 | 0 | 0 | 0 | 0 | 0 | 0 | 0 |
| 42.8210 | 11.5320 | 6.1480  | C | 0 | 0 | 0 | 0 | 0 | 0 | 0 | 0 | 0 | 0 | 0 | 0 | 0 | 0 | 0 | 0 |
| 42.6820 | 12.3800 | 5.4680  | H | 0 | 0 | 0 | 0 | 0 | 0 | 0 | 0 | 0 | 0 | 0 | 0 | 0 | 0 | 0 | 0 |
| 42.7950 | 11.9260 | 7.1690  | H | 0 | 0 | 0 | 0 | 0 | 0 | 0 | 0 | 0 | 0 | 0 | 0 | 0 | 0 | 0 | 0 |
| 44.1600 | 10.8330 | 5.9110  | C | 0 | 0 | 0 | 0 | 0 | 0 | 0 | 0 | 0 | 0 | 0 | 0 | 0 | 0 | 0 | 0 |
| 44.2450 | 9.9780  | 6.5930  | H | 0 | 0 | 0 | 0 | 0 | 0 | 0 | 0 | 0 | 0 | 0 | 0 | 0 | 0 | 0 | 0 |
| 44.1920 | 10.4130 | 4.9000  | H | 0 | 0 | 0 | 0 | 0 | 0 | 0 | 0 | 0 | 0 | 0 | 0 | 0 | 0 | 0 | 0 |
| 45.3410 | 11.7850 | 6.1070  | C | 0 | 0 | 0 | 0 | 0 | 0 | 0 | 0 | 0 | 0 | 0 | 0 | 0 | 0 | 0 | 0 |
| 45.2450 | 12.6330 | 5.4190  | H | 0 | 0 | 0 | 0 | 0 | 0 | 0 | 0 | 0 | 0 | 0 | 0 | 0 | 0 | 0 | 0 |
| 45.3230 | 12.1900 | 7.1260  | H | 0 | 0 | 0 | 0 | 0 | 0 | 0 | 0 | 0 | 0 | 0 | 0 | 0 | 0 | 0 | 0 |
| 46.6760 | 11.0750 | 5.8620  | C | 0 | 0 | 0 | 0 | 0 | 0 | 0 | 0 | 0 | 0 | 0 | 0 | 0 | 0 | 0 | 0 |
| 46.7760 | 10.2340 | 6.5590  | H | 0 | 0 | 0 | 0 | 0 | 0 | 0 | 0 | 0 | 0 | 0 | 0 | 0 | 0 | 0 | 0 |
| 46.6880 | 10.6570 | 4.8480  | H | 0 | 0 | 0 | 0 | 0 | 0 | 0 | 0 | 0 | 0 | 0 | 0 | 0 | 0 | 0 | 0 |
| 47.8610 | 12.0250 | 6.0350  | C | 0 | 0 | 0 | 0 | 0 | 0 | 0 | 0 | 0 | 0 | 0 | 0 | 0 | 0 | 0 | 0 |
| 47.7710 | 12.8730 | 5.3450  | H | 0 | 0 | 0 | 0 | 0 | 0 | 0 | 0 | 0 | 0 | 0 | 0 | 0 | 0 | 0 | 0 |
| 47.8580 | 12.4570 | 7.0440  | H | 0 | 0 | 0 | 0 | 0 | 0 | 0 | 0 | 0 | 0 | 0 | 0 | 0 | 0 | 0 | 0 |
| 49.1920 | 11.3170 | 5.7930  | C | 0 | 0 | 0 | 0 | 0 | 0 | 0 | 0 | 0 | 0 | 0 | 0 | 0 | 0 | 0 | 0 |
| 49.3160 | 10.4980 | 6.5100  | H | 0 | 0 | 0 | 0 | 0 | 0 | 0 | 0 | 0 | 0 | 0 | 0 | 0 | 0 | 0 | 0 |
| 49.2170 | 10.9100 | 4.7770  | H | 0 | 0 | 0 | 0 | 0 | 0 | 0 | 0 | 0 | 0 | 0 | 0 | 0 | 0 | 0 | 0 |
| 50.2460 | 12.2650 | 5.9640  | O | 0 | 0 | 0 | 0 | 0 | 0 | 0 | 0 | 0 | 0 | 0 | 0 | 0 | 0 | 0 | 0 |
| 51.5480 | 11.6980 | 5.8340  | C | 0 | 0 | 0 | 0 | 0 | 0 | 0 | 0 | 0 | 0 | 0 | 0 | 0 | 0 | 0 | 0 |
| 51.6210 | 10.7530 | 6.3860  | H | 0 | 0 | 0 | 0 | 0 | 0 | 0 | 0 | 0 | 0 | 0 | 0 | 0 | 0 | 0 | 0 |
| 52.2480 | 12.3860 | 6.3230  | H | 0 | 0 | 0 | 0 | 0 | 0 | 0 | 0 | 0 | 0 | 0 | 0 | 0 | 0 | 0 | 0 |
| 63.1460 | 11.4510 | 3.5090  | C | 0 | 0 | 0 | 0 | 0 | 0 | 0 | 0 | 0 | 0 | 0 | 0 | 0 | 0 | 0 | 0 |
| 64.0000 | 10.9650 | 3.0230  | H | 0 | 0 | 0 | 0 | 0 | 0 | 0 | 0 | 0 | 0 | 0 | 0 | 0 | 0 | 0 | 0 |
| 63.5210 | 12.0660 | 4.3350  | H | 0 | 0 | 0 | 0 | 0 | 0 | 0 | 0 | 0 | 0 | 0 | 0 | 0 | 0 | 0 | 0 |
| 62.6990 | 12.1140 | 2.7590  | H | 0 | 0 | 0 | 0 | 0 | 0 | 0 | 0 | 0 | 0 | 0 | 0 | 0 | 0 | 0 | 0 |
| 62.1720 | 10.4530 | 3.9610  | N | 0 | 0 | 0 | 0 | 0 | 0 | 0 | 0 | 0 | 0 | 0 | 0 | 0 | 0 | 0 | 0 |
| 60.9970 | 11.1240 | 4.5550  | C | 0 | 0 | 0 | 0 | 0 | 0 | 0 | 0 | 0 | 0 | 0 | 0 | 0 | 0 | 0 | 0 |
| 61.2820 | 11.6590 | 5.4710  | H | 0 | 0 | 0 | 0 | 0 | 0 | 0 | 0 | 0 | 0 | 0 | 0 | 0 | 0 | 0 | 0 |
| 60.6370 | 11.8820 | 3.8460  | H | 0 | 0 | 0 | 0 | 0 | 0 | 0 | 0 | 0 | 0 | 0 | 0 | 0 | 0 | 0 | 0 |
| 59.8150 | 10.1810 | 4.8550  | C | 0 | 0 | 0 | 0 | 0 | 0 | 0 | 0 | 0 | 0 | 0 | 0 | 0 | 0 | 0 | 0 |
| 59.5480 | 9.6270  | 3.9460  | H | 0 | 0 | 0 | 0 | 0 | 0 | 0 | 0 | 0 | 0 | 0 | 0 | 0 | 0 | 0 | 0 |
| 60.1130 | 9.4460  | 5.6080  | H | 0 | 0 | 0 | 0 | 0 | 0 | 0 | 0 | 0 | 0 | 0 | 0 | 0 | 0 | 0 | 0 |
| 58.5890 | 10.9770 | 5.3460  | C | 0 | 0 | 0 | 0 | 0 | 0 | 0 | 0 | 0 | 0 | 0 | 0 | 0 | 0 | 0 | 0 |
| 58.8490 | 11.5670 | 6.2350  | H | 0 | 0 | 0 | 0 | 0 | 0 | 0 | 0 | 0 | 0 | 0 | 0 | 0 | 0 | 0 | 0 |
| 58.3460 | 11.6980 | 4.5560  | H | 0 | 0 | 0 | 0 | 0 | 0 | 0 | 0 | 0 | 0 | 0 | 0 | 0 | 0 | 0 | 0 |
| 62.8110 | 9.5290  | 4.9010  | C | 0 | 0 | 0 | 0 | 0 | 0 | 0 | 0 | 0 | 0 | 0 | 0 | 0 | 0 | 0 | 0 |
| 63.1160 | 10.0280 | 5.8280  | H | 0 | 0 | 0 | 0 | 0 | 0 | 0 | 0 | 0 | 0 | 0 | 0 | 0 | 0 | 0 | 0 |
| 63.7000 | 9.0750  | 4.4490  | H | 0 | 0 | 0 | 0 | 0 | 0 | 0 | 0 | 0 | 0 | 0 | 0 | 0 | 0 | 0 | 0 |
| 62.1470 | 8.6970  | 5.1540  | H | 0 | 0 | 0 | 0 | 0 | 0 | 0 | 0 | 0 | 0 | 0 | 0 | 0 | 0 | 0 | 0 |
| 57.4100 | 10.1210 | 5.6190  | N | 0 | 0 | 3 | 0 | 0 | 0 | 0 | 0 | 0 | 0 | 0 | 0 | 0 | 0 | 0 | 0 |
| 63.8650 | -4.1320 | 8.9180  | C | 0 | 0 | 0 | 0 | 0 | 0 | 0 | 0 | 0 | 0 | 0 | 0 | 0 | 0 | 0 | 0 |
| 64.7640 | -3.6990 | 8.4620  | H | 0 | 0 | 0 | 0 | 0 | 0 | 0 | 0 | 0 | 0 | 0 | 0 | 0 | 0 | 0 | 0 |
| 63.0180 | -3.6870 | 8.3870  | H | 0 | 0 | 0 | 0 | 0 | 0 | 0 | 0 | 0 | 0 | 0 | 0 | 0 | 0 | 0 | 0 |
| 63.7940 | -5.5490 | 8.6980  | O | 0 | 0 | 0 | 0 | 0 | 0 | 0 | 0 | 0 | 0 | 0 | 0 | 0 | 0 | 0 | 0 |
| 64.9730 | -6.2260 | 8.8080  | C | 0 | 0 | 0 | 0 | 0 | 0 | 0 | 0 | 0 | 0 | 0 | 0 | 0 | 0 | 0 | 0 |
| 64.7320 | -7.6890 | 8.5340  | C | 0 | 0 | 0 | 0 | 0 | 0 | 0 | 0 | 0 | 0 | 0 | 0 | 0 | 0 | 0 | 0 |
| 63.9760 | -8.0430 | 9.2390  | H | 0 | 0 | 0 | 0 | 0 | 0 | 0 | 0 | 0 | 0 | 0 | 0 | 0 | 0 | 0 | 0 |
| 64.3350 | -7.7670 | 7.5170  | H | 0 | 0 | 0 | 0 | 0 | 0 | 0 | 0 | 0 | 0 | 0 | 0 | 0 | 0 | 0 | 0 |
| 66.0330 | -8.4860 | 8.6750  | C | 0 | 0 | 0 | 0 | 0 | 0 | 0 | 0 | 0 | 0 | 0 | 0 | 0 | 0 | 0 | 0 |
| 66.4820 | -8.2860 | 9.6580  | H | 0 | 0 | 0 | 0 | 0 | 0 | 0 | 0 | 0 | 0 | 0 | 0 | 0 | 0 | 0 | 0 |
| 66.7630 | -8.0800 | 7.9630  | H | 0 | 0 | 0 | 0 | 0 | 0 | 0 | 0 | 0 | 0 | 0 | 0 | 0 | 0 | 0 | 0 |
| 66.0540 | -5.7260 | 9.0820  | O | 0 | 0 | 0 | 0 | 0 | 0 | 0 | 0 | 0 | 0 | 0 | 0 | 0 | 0 | 0 | 0 |
| 58.0460 | 6.3440  | 9.8470  | C | 0 | 0 | 0 | 0 | 0 | 0 | 0 | 0 | 0 | 0 | 0 | 0 | 0 | 0 | 0 | 0 |
| 58.0280 | 7.1330  | 10.6080 | H | 0 | 0 | 0 | 0 | 0 | 0 | 0 | 0 | 0 | 0 | 0 | 0 | 0 | 0 | 0 | 0 |
| 57.2220 | 5.6490  | 10.0520 | H | 0 | 0 | 0 | 0 | 0 | 0 | 0 | 0 | 0 | 0 | 0 | 0 | 0 | 0 | 0 | 0 |
| 57.5510 | 9.4160  | 6.9120  | C | 0 | 0 | 0 | 0 | 0 | 0 | 0 | 0 | 0 | 0 | 0 | 0 | 0 | 0 | 0 | 0 |
| 58.5860 | 9.0900  | 7.0660  | H | 0 | 0 | 0 | 0 | 0 | 0 | 0 | 0 | 0 | 0 | 0 | 0 | 0 | 0 | 0 | 0 |
| 57.3270 | 10.0890 | 7.7510  | H | 0 | 0 | 0 | 0 | 0 | 0 | 0 | 0 | 0 | 0 | 0 | 0 | 0 | 0 | 0 | 0 |
| 56.6750 | 8.1630  | 6.9630  | C | 0 | 0 | 0 | 0 | 0 | 0 | 0 | 0 | 0 | 0 | 0 | 0 | 0 | 0 | 0 | 0 |
| 55.6250 | 8.3740  | 6.7320  | H | 0 | 0 | 0 | 0 | 0 | 0 | 0 | 0 | 0 | 0 | 0 | 0 | 0 | 0 | 0 | 0 |
| 57.0070 | 7.4120  | 6.2370  | H | 0 | 0 | 0 | 0 | 0 | 0 | 0 | 0 | 0 | 0 | 0 | 0 | 0 | 0 | 0 | 0 |
| 56.7120 | 7.5640  | 8.3430  | C | 0 | 0 | 0 | 0 | 0 | 0 | 0 | 0 | 0 | 0 | 0 | 0 | 0 | 0 | 0 | 0 |
| 57.8960 | 6.9220  | 8.5440  | O | 0 | 0 | 0 | 0 | 0 | 0 | 0 | 0 | 0 | 0 | 0 | 0 | 0 | 0 | 0 | 0 |
| 55.8060 | 7.6630  | 9.1600  | O | 0 | 0 | 0 | 0 | 0 | 0 | 0 | 0 | 0 | 0 | 0 | 0 | 0 | 0 | 0 | 0 |
| 59.3720 | 5.5990  | 9.9010  | C | 0 | 0 | 0 | 0 | 0 | 0 | 0 | 0 | 0 | 0 | 0 | 0 | 0 | 0 | 0 | 0 |
| 59.3770 | 4.8040  | 9.1480  | H | 0 | 0 | 0 | 0 | 0 | 0 | 0 | 0 | 0 | 0 | 0 | 0 | 0 | 0 | 0 | 0 |
| 60.1940 | 6.2860  | 9.6670  | H | 0 | 0 | 0 | 0 | 0 | 0 | 0 | 0 | 0 | 0 | 0 | 0 | 0 | 0 | 0 | 0 |
| 59.5440 | 5.0630  | 11.2090 | O | 0 | 0 | 0 | 0 | 0 | 0 | 0 | 0 | 0 | 0 | 0 | 0 | 0 | 0 | 0 | 0 |



|         |          |         |   |   |   |   |   |   |   |   |   |   |   |   |   |   |
|---------|----------|---------|---|---|---|---|---|---|---|---|---|---|---|---|---|---|
| 60.7500 | 4.3140   | 11.3540 | C | 0 | 0 | 0 | 0 | 0 | 0 | 0 | 0 | 0 | 0 | 0 | 0 | 0 |
| 61.5780 | 4.8070   | 10.8300 | H | 0 | 0 | 0 | 0 | 0 | 0 | 0 | 0 | 0 | 0 | 0 | 0 | 0 |
| 60.9950 | 4.3150   | 12.4220 | H | 0 | 0 | 0 | 0 | 0 | 0 | 0 | 0 | 0 | 0 | 0 | 0 | 0 |
| 60.5620 | 2.8720   | 10.8830 | C | 0 | 0 | 0 | 0 | 0 | 0 | 0 | 0 | 0 | 0 | 0 | 0 | 0 |
| 59.7090 | 2.4300   | 11.4120 | H | 0 | 0 | 0 | 0 | 0 | 0 | 0 | 0 | 0 | 0 | 0 | 0 | 0 |
| 60.2960 | 2.8560   | 9.8200  | H | 0 | 0 | 0 | 0 | 0 | 0 | 0 | 0 | 0 | 0 | 0 | 0 | 0 |
| 61.8190 | 2.0320   | 11.1110 | C | 0 | 0 | 0 | 0 | 0 | 0 | 0 | 0 | 0 | 0 | 0 | 0 | 0 |
| 62.6600 | 2.4750   | 10.5620 | H | 0 | 0 | 0 | 0 | 0 | 0 | 0 | 0 | 0 | 0 | 0 | 0 | 0 |
| 62.0830 | 2.0470   | 12.1750 | H | 0 | 0 | 0 | 0 | 0 | 0 | 0 | 0 | 0 | 0 | 0 | 0 | 0 |
| 61.6160 | 0.5840   | 10.6560 | C | 0 | 0 | 0 | 0 | 0 | 0 | 0 | 0 | 0 | 0 | 0 | 0 | 0 |
| 60.7810 | 0.1400   | 11.2120 | H | 0 | 0 | 0 | 0 | 0 | 0 | 0 | 0 | 0 | 0 | 0 | 0 | 0 |
| 61.3420 | 0.5680   | 9.5940  | H | 0 | 0 | 0 | 0 | 0 | 0 | 0 | 0 | 0 | 0 | 0 | 0 | 0 |
| 62.8760 | -0.2550  | 10.8700 | C | 0 | 0 | 0 | 0 | 0 | 0 | 0 | 0 | 0 | 0 | 0 | 0 | 0 |
| 63.7160 | 0.1750   | 10.3100 | H | 0 | 0 | 0 | 0 | 0 | 0 | 0 | 0 | 0 | 0 | 0 | 0 | 0 |
| 63.1740 | -0.2290  | 11.9250 | H | 0 | 0 | 0 | 0 | 0 | 0 | 0 | 0 | 0 | 0 | 0 | 0 | 0 |
| 62.6720 | -1.7050  | 10.4410 | C | 0 | 0 | 0 | 0 | 0 | 0 | 0 | 0 | 0 | 0 | 0 | 0 | 0 |
| 61.8650 | -2.1590  | 11.0280 | H | 0 | 0 | 0 | 0 | 0 | 0 | 0 | 0 | 0 | 0 | 0 | 0 | 0 |
| 62.4090 | -1.7460  | 9.3790  | H | 0 | 0 | 0 | 0 | 0 | 0 | 0 | 0 | 0 | 0 | 0 | 0 | 0 |
| 63.8890 | -2.4160  | 10.6670 | O | 0 | 0 | 0 | 0 | 0 | 0 | 0 | 0 | 0 | 0 | 0 | 0 | 0 |
| 63.7870 | -3.8140  | 10.4090 | C | 0 | 0 | 0 | 0 | 0 | 0 | 0 | 0 | 0 | 0 | 0 | 0 | 0 |
| 62.8750 | -4.2290  | 10.8550 | H | 0 | 0 | 0 | 0 | 0 | 0 | 0 | 0 | 0 | 0 | 0 | 0 | 0 |
| 64.6210 | -4.2970  | 10.9290 | H | 0 | 0 | 0 | 0 | 0 | 0 | 0 | 0 | 0 | 0 | 0 | 0 | 0 |
| 61.9520 | -12.2880 | 11.4130 | C | 0 | 0 | 0 | 0 | 0 | 0 | 0 | 0 | 0 | 0 | 0 | 0 | 0 |
| 61.6550 | -11.6200 | 10.5960 | H | 0 | 0 | 0 | 0 | 0 | 0 | 0 | 0 | 0 | 0 | 0 | 0 | 0 |
| 61.0660 | -12.4830 | 12.0270 | H | 0 | 0 | 0 | 0 | 0 | 0 | 0 | 0 | 0 | 0 | 0 | 0 | 0 |
| 62.2510 | -13.2500 | 10.9830 | H | 0 | 0 | 0 | 0 | 0 | 0 | 0 | 0 | 0 | 0 | 0 | 0 | 0 |
| 63.0240 | -11.7310 | 12.2340 | N | 0 | 0 | 0 | 0 | 0 | 0 | 0 | 0 | 0 | 0 | 0 | 0 | 0 |
| 64.3030 | -11.6420 | 11.5150 | C | 0 | 0 | 0 | 0 | 0 | 0 | 0 | 0 | 0 | 0 | 0 | 0 | 0 |
| 65.0820 | -11.3600 | 12.2370 | H | 0 | 0 | 0 | 0 | 0 | 0 | 0 | 0 | 0 | 0 | 0 | 0 | 0 |
| 64.5790 | -12.6510 | 11.1810 | H | 0 | 0 | 0 | 0 | 0 | 0 | 0 | 0 | 0 | 0 | 0 | 0 | 0 |
| 64.3680 | -10.6790 | 10.3140 | C | 0 | 0 | 0 | 0 | 0 | 0 | 0 | 0 | 0 | 0 | 0 | 0 | 0 |
| 63.6000 | -10.9410 | 9.5790  | H | 0 | 0 | 0 | 0 | 0 | 0 | 0 | 0 | 0 | 0 | 0 | 0 | 0 |
| 64.1730 | -9.6610  | 10.6610 | H | 0 | 0 | 0 | 0 | 0 | 0 | 0 | 0 | 0 | 0 | 0 | 0 | 0 |
| 65.7550 | -10.7400 | 9.6580  | C | 0 | 0 | 0 | 0 | 0 | 0 | 0 | 0 | 0 | 0 | 0 | 0 | 0 |
| 66.5140 | -10.4610 | 10.4020 | H | 0 | 0 | 0 | 0 | 0 | 0 | 0 | 0 | 0 | 0 | 0 | 0 | 0 |
| 65.9850 | -11.7850 | 9.4120  | H | 0 | 0 | 0 | 0 | 0 | 0 | 0 | 0 | 0 | 0 | 0 | 0 | 0 |
| 62.6200 | -10.4650 | 12.8390 | C | 0 | 0 | 0 | 0 | 0 | 0 | 0 | 0 | 0 | 0 | 0 | 0 | 0 |
| 61.7540 | -10.6160 | 13.4920 | H | 0 | 0 | 0 | 0 | 0 | 0 | 0 | 0 | 0 | 0 | 0 | 0 | 0 |
| 62.3520 | -9.7080  | 12.0940 | H | 0 | 0 | 0 | 0 | 0 | 0 | 0 | 0 | 0 | 0 | 0 | 0 | 0 |
| 63.4210 | -10.0630 | 13.4700 | H | 0 | 0 | 0 | 0 | 0 | 0 | 0 | 0 | 0 | 0 | 0 | 0 | 0 |
| 65.9630 | -9.9340  | 8.4510  | N | 0 | 0 | 3 | 0 | 0 | 0 | 0 | 0 | 0 | 0 | 0 | 0 | 0 |
| 69.0580 | -20.6220 | 1.1200  | C | 0 | 0 | 0 | 0 | 0 | 0 | 0 | 0 | 0 | 0 | 0 | 0 | 0 |
| 68.0280 | -20.9850 | 1.0230  | H | 0 | 0 | 0 | 0 | 0 | 0 | 0 | 0 | 0 | 0 | 0 | 0 | 0 |
| 68.9840 | -19.6120 | 1.5350  | H | 0 | 0 | 0 | 0 | 0 | 0 | 0 | 0 | 0 | 0 | 0 | 0 | 0 |
| 69.8030 | -21.4000 | 2.0690  | O | 0 | 0 | 0 | 0 | 0 | 0 | 0 | 0 | 0 | 0 | 0 | 0 | 0 |
| 69.5770 | -22.7450 | 2.0490  | C | 0 | 0 | 0 | 0 | 0 | 0 | 0 | 0 | 0 | 0 | 0 | 0 | 0 |
| 70.4180 | -23.4060 | 3.1150  | C | 0 | 0 | 0 | 0 | 0 | 0 | 0 | 0 | 0 | 0 | 0 | 0 | 0 |
| 71.4720 | -23.1900 | 2.9080  | H | 0 | 0 | 0 | 0 | 0 | 0 | 0 | 0 | 0 | 0 | 0 | 0 | 0 |
| 70.1470 | -22.9770 | 4.0860  | H | 0 | 0 | 0 | 0 | 0 | 0 | 0 | 0 | 0 | 0 | 0 | 0 | 0 |
| 70.2110 | -24.9100 | 3.1540  | C | 0 | 0 | 0 | 0 | 0 | 0 | 0 | 0 | 0 | 0 | 0 | 0 | 0 |
| 69.1650 | -25.1580 | 3.3630  | H | 0 | 0 | 0 | 0 | 0 | 0 | 0 | 0 | 0 | 0 | 0 | 0 | 0 |
| 70.8330 | -25.3600 | 3.9350  | H | 0 | 0 | 0 | 0 | 0 | 0 | 0 | 0 | 0 | 0 | 0 | 0 | 0 |
| 70.4790 | -25.3690 | 2.1970  | H | 0 | 0 | 0 | 0 | 0 | 0 | 0 | 0 | 0 | 0 | 0 | 0 | 0 |
| 68.8170 | -23.3230 | 1.2860  | O | 0 | 0 | 0 | 0 | 0 | 0 | 0 | 0 | 0 | 0 | 0 | 0 | 0 |
| 65.1490 | -10.6880 | 2.4380  | C | 0 | 0 | 0 | 0 | 0 | 0 | 0 | 0 | 0 | 0 | 0 | 0 | 0 |
| 64.0770 | -10.4530 | 2.4060  | H | 0 | 0 | 0 | 0 | 0 | 0 | 0 | 0 | 0 | 0 | 0 | 0 | 0 |
| 65.6010 | -10.1360 | 1.6070  | H | 0 | 0 | 0 | 0 | 0 | 0 | 0 | 0 | 0 | 0 | 0 | 0 | 0 |
| 65.1940 | -10.3820 | 7.2890  | C | 0 | 0 | 0 | 0 | 0 | 0 | 0 | 0 | 0 | 0 | 0 | 0 | 0 |
| 65.1980 | -11.4800 | 7.2550  | H | 0 | 0 | 0 | 0 | 0 | 0 | 0 | 0 | 0 | 0 | 0 | 0 | 0 |
| 64.1400 | -10.0900 | 7.3710  | H | 0 | 0 | 0 | 0 | 0 | 0 | 0 | 0 | 0 | 0 | 0 | 0 | 0 |
| 65.7960 | -9.8820  | 5.9720  | C | 0 | 0 | 0 | 0 | 0 | 0 | 0 | 0 | 0 | 0 | 0 | 0 | 0 |
| 65.7690 | -8.7900  | 5.9050  | H | 0 | 0 | 0 | 0 | 0 | 0 | 0 | 0 | 0 | 0 | 0 | 0 | 0 |
| 66.8370 | -10.2180 | 5.8980  | H | 0 | 0 | 0 | 0 | 0 | 0 | 0 | 0 | 0 | 0 | 0 | 0 | 0 |
| 65.0360 | -10.4290 | 4.7920  | C | 0 | 0 | 0 | 0 | 0 | 0 | 0 | 0 | 0 | 0 | 0 | 0 | 0 |
| 65.7480 | -10.2070 | 3.6510  | O | 0 | 0 | 0 | 0 | 0 | 0 | 0 | 0 | 0 | 0 | 0 | 0 | 0 |
| 63.9420 | -10.9730 | 4.8520  | O | 0 | 0 | 0 | 0 | 0 | 0 | 0 | 0 | 0 | 0 | 0 | 0 | 0 |
| 65.4010 | -12.1810 | 2.2640  | C | 0 | 0 | 0 | 0 | 0 | 0 | 0 | 0 | 0 | 0 | 0 | 0 | 0 |
| 66.4790 | -12.3710 | 2.2710  | H | 0 | 0 | 0 | 0 | 0 | 0 | 0 | 0 | 0 | 0 | 0 | 0 | 0 |
| 64.9580 | -12.7410 | 3.0950  | H | 0 | 0 | 0 | 0 | 0 | 0 | 0 | 0 | 0 | 0 | 0 | 0 | 0 |
| 64.8280 | -12.6020 | 1.0300  | O | 0 | 0 | 0 | 0 | 0 | 0 | 0 | 0 | 0 | 0 | 0 | 0 | 0 |
| 64.8790 | -14.0150 | 0.8340  | C | 0 | 0 | 0 | 0 | 0 | 0 | 0 | 0 | 0 | 0 | 0 | 0 | 0 |
| 64.5530 | -14.5390 | 1.7400  | H | 0 | 0 | 0 | 0 | 0 | 0 | 0 | 0 | 0 | 0 | 0 | 0 | 0 |
| 64.1520 | -14.2460 | 0.0480  | H | 0 | 0 | 0 | 0 | 0 | 0 | 0 | 0 | 0 | 0 | 0 | 0 | 0 |
| 66.2660 | -14.4730 | 0.3870  | C | 0 | 0 | 0 | 0 | 0 | 0 | 0 | 0 | 0 | 0 | 0 | 0 | 0 |
| 66.5810 | -13.8850 | -0.4840 | H | 0 | 0 | 0 | 0 | 0 | 0 | 0 | 0 | 0 | 0 | 0 | 0 | 0 |
| 67.0000 | -14.2650 | 1.1740  | H | 0 | 0 | 0 | 0 | 0 | 0 | 0 | 0 | 0 | 0 | 0 | 0 | 0 |
| 66.2800 | -15.9640 | 0.0550  | C | 0 | 0 | 0 | 0 | 0 | 0 | 0 | 0 | 0 | 0 | 0 | 0 | 0 |
| 65.9450 | -16.5360 | 0.9290  | H | 0 | 0 | 0 | 0 | 0 | 0 | 0 | 0 | 0 | 0 | 0 | 0 | 0 |
| 65.5690 | -16.1680 | -0.7560 | H | 0 | 0 | 0 | 0 | 0 | 0 | 0 | 0 | 0 | 0 | 0 | 0 | 0 |
| 67.6760 | -16.4330 | -0.3580 | C | 0 | 0 | 0 | 0 | 0 | 0 | 0 | 0 | 0 | 0 | 0 | 0 | 0 |
| 68.0050 | -15.8800 | -1.2450 | H | 0 | 0 | 0 | 0 | 0 | 0 | 0 | 0 | 0 | 0 | 0 | 0 | 0 |

|         |          |         |   |   |   |   |   |   |   |   |   |   |   |   |   |
|---------|----------|---------|---|---|---|---|---|---|---|---|---|---|---|---|---|
| 68.3880 | -16.2100 | 0.4460  | H | 0 | 0 | 0 | 0 | 0 | 0 | 0 | 0 | 0 | 0 | 0 | 0 |
| 67.6910 | -17.9320 | -0.6510 | C | 0 | 0 | 0 | 0 | 0 | 0 | 0 | 0 | 0 | 0 | 0 | 0 |
| 67.3120 | -18.4860 | 0.2160  | H | 0 | 0 | 0 | 0 | 0 | 0 | 0 | 0 | 0 | 0 | 0 | 0 |
| 67.0050 | -18.1660 | -1.4740 | H | 0 | 0 | 0 | 0 | 0 | 0 | 0 | 0 | 0 | 0 | 0 | 0 |
| 69.0910 | -18.4240 | -1.0070 | C | 0 | 0 | 0 | 0 | 0 | 0 | 0 | 0 | 0 | 0 | 0 | 0 |
| 69.4120 | -17.9670 | -1.9490 | H | 0 | 0 | 0 | 0 | 0 | 0 | 0 | 0 | 0 | 0 | 0 | 0 |
| 69.8220 | -18.1430 | -0.2390 | H | 0 | 0 | 0 | 0 | 0 | 0 | 0 | 0 | 0 | 0 | 0 | 0 |
| 69.0540 | -19.8360 | -1.2120 | O | 0 | 0 | 0 | 0 | 0 | 0 | 0 | 0 | 0 | 0 | 0 | 0 |
| 69.7670 | -20.5890 | -0.2330 | C | 0 | 0 | 0 | 0 | 0 | 0 | 0 | 0 | 0 | 0 | 0 | 0 |
| 70.7930 | -20.2140 | -0.1330 | H | 0 | 0 | 0 | 0 | 0 | 0 | 0 | 0 | 0 | 0 | 0 | 0 |
| 69.8610 | -21.6100 | -0.6200 | H | 0 | 0 | 0 | 0 | 0 | 0 | 0 | 0 | 0 | 0 | 0 | 0 |
| 1       | 2        | 1       | 0 | 0 | 0 | 0 | 0 | 0 | 0 | 0 | 0 | 0 | 0 | 0 | 0 |
| 1       | 3        | 1       | 0 | 0 | 0 | 0 | 0 | 0 | 0 | 0 | 0 | 0 | 0 | 0 | 0 |
| 1       | 4        | 1       | 0 | 0 | 0 | 0 | 0 | 0 | 0 | 0 | 0 | 0 | 0 | 0 | 0 |
| 1       | 5        | 1       | 0 | 0 | 0 | 0 | 0 | 0 | 0 | 0 | 0 | 0 | 0 | 0 | 0 |
| 5       | 6        | 1       | 0 | 0 | 0 | 0 | 0 | 0 | 0 | 0 | 0 | 0 | 0 | 0 | 0 |
| 5       | 15       | 1       | 0 | 0 | 0 | 0 | 0 | 0 | 0 | 0 | 0 | 0 | 0 | 0 | 0 |
| 6       | 7        | 1       | 0 | 0 | 0 | 0 | 0 | 0 | 0 | 0 | 0 | 0 | 0 | 0 | 0 |
| 6       | 8        | 1       | 0 | 0 | 0 | 0 | 0 | 0 | 0 | 0 | 0 | 0 | 0 | 0 | 0 |
| 6       | 9        | 1       | 0 | 0 | 0 | 0 | 0 | 0 | 0 | 0 | 0 | 0 | 0 | 0 | 0 |
| 9       | 10       | 1       | 0 | 0 | 0 | 0 | 0 | 0 | 0 | 0 | 0 | 0 | 0 | 0 | 0 |
| 9       | 11       | 1       | 0 | 0 | 0 | 0 | 0 | 0 | 0 | 0 | 0 | 0 | 0 | 0 | 0 |
| 9       | 12       | 1       | 0 | 0 | 0 | 0 | 0 | 0 | 0 | 0 | 0 | 0 | 0 | 0 | 0 |
| 12      | 13       | 1       | 0 | 0 | 0 | 0 | 0 | 0 | 0 | 0 | 0 | 0 | 0 | 0 | 0 |
| 12      | 14       | 1       | 0 | 0 | 0 | 0 | 0 | 0 | 0 | 0 | 0 | 0 | 0 | 0 | 0 |
| 12      | 19       | 1       | 0 | 0 | 0 | 0 | 0 | 0 | 0 | 0 | 0 | 0 | 0 | 0 | 0 |
| 15      | 16       | 1       | 0 | 0 | 0 | 0 | 0 | 0 | 0 | 0 | 0 | 0 | 0 | 0 | 0 |
| 15      | 17       | 1       | 0 | 0 | 0 | 0 | 0 | 0 | 0 | 0 | 0 | 0 | 0 | 0 | 0 |
| 15      | 18       | 1       | 0 | 0 | 0 | 0 | 0 | 0 | 0 | 0 | 0 | 0 | 0 | 0 | 0 |
| 19      | 20       | 1       | 0 | 0 | 0 | 0 | 0 | 0 | 0 | 0 | 0 | 0 | 0 | 0 | 0 |
| 19      | 36       | 1       | 0 | 0 | 0 | 0 | 0 | 0 | 0 | 0 | 0 | 0 | 0 | 0 | 0 |
| 21      | 22       | 1       | 0 | 0 | 0 | 0 | 0 | 0 | 0 | 0 | 0 | 0 | 0 | 0 | 0 |
| 21      | 23       | 1       | 0 | 0 | 0 | 0 | 0 | 0 | 0 | 0 | 0 | 0 | 0 | 0 | 0 |
| 21      | 24       | 1       | 0 | 0 | 0 | 0 | 0 | 0 | 0 | 0 | 0 | 0 | 0 | 0 | 0 |
| 21      | 68       | 1       | 0 | 0 | 0 | 0 | 0 | 0 | 0 | 0 | 0 | 0 | 0 | 0 | 0 |
| 24      | 25       | 1       | 0 | 0 | 0 | 0 | 0 | 0 | 0 | 0 | 0 | 0 | 0 | 0 | 0 |
| 25      | 26       | 1       | 0 | 0 | 0 | 0 | 0 | 0 | 0 | 0 | 0 | 0 | 0 | 0 | 0 |
| 25      | 32       | 2       | 0 | 0 | 0 | 0 | 0 | 0 | 0 | 0 | 0 | 0 | 0 | 0 | 0 |
| 26      | 27       | 1       | 0 | 0 | 0 | 0 | 0 | 0 | 0 | 0 | 0 | 0 | 0 | 0 | 0 |
| 26      | 28       | 1       | 0 | 0 | 0 | 0 | 0 | 0 | 0 | 0 | 0 | 0 | 0 | 0 | 0 |
| 26      | 29       | 1       | 0 | 0 | 0 | 0 | 0 | 0 | 0 | 0 | 0 | 0 | 0 | 0 | 0 |
| 29      | 30       | 1       | 0 | 0 | 0 | 0 | 0 | 0 | 0 | 0 | 0 | 0 | 0 | 0 | 0 |
| 29      | 31       | 1       | 0 | 0 | 0 | 0 | 0 | 0 | 0 | 0 | 0 | 0 | 0 | 0 | 0 |
| 29      | 89       | 1       | 0 | 0 | 0 | 0 | 0 | 0 | 0 | 0 | 0 | 0 | 0 | 0 | 0 |
| 33      | 34       | 1       | 0 | 0 | 0 | 0 | 0 | 0 | 0 | 0 | 0 | 0 | 0 | 0 | 0 |
| 33      | 35       | 1       | 0 | 0 | 0 | 0 | 0 | 0 | 0 | 0 | 0 | 0 | 0 | 0 | 0 |
| 33      | 43       | 1       | 0 | 0 | 0 | 0 | 0 | 0 | 0 | 0 | 0 | 0 | 0 | 0 | 0 |
| 33      | 45       | 1       | 0 | 0 | 0 | 0 | 0 | 0 | 0 | 0 | 0 | 0 | 0 | 0 | 0 |
| 36      | 37       | 1       | 0 | 0 | 0 | 0 | 0 | 0 | 0 | 0 | 0 | 0 | 0 | 0 | 0 |
| 36      | 38       | 1       | 0 | 0 | 0 | 0 | 0 | 0 | 0 | 0 | 0 | 0 | 0 | 0 | 0 |
| 36      | 39       | 1       | 0 | 0 | 0 | 0 | 0 | 0 | 0 | 0 | 0 | 0 | 0 | 0 | 0 |
| 39      | 40       | 1       | 0 | 0 | 0 | 0 | 0 | 0 | 0 | 0 | 0 | 0 | 0 | 0 | 0 |
| 39      | 41       | 1       | 0 | 0 | 0 | 0 | 0 | 0 | 0 | 0 | 0 | 0 | 0 | 0 | 0 |
| 39      | 42       | 1       | 0 | 0 | 0 | 0 | 0 | 0 | 0 | 0 | 0 | 0 | 0 | 0 | 0 |
| 42      | 43       | 1       | 0 | 0 | 0 | 0 | 0 | 0 | 0 | 0 | 0 | 0 | 0 | 0 | 0 |
| 42      | 44       | 2       | 0 | 0 | 0 | 0 | 0 | 0 | 0 | 0 | 0 | 0 | 0 | 0 | 0 |
| 45      | 46       | 1       | 0 | 0 | 0 | 0 | 0 | 0 | 0 | 0 | 0 | 0 | 0 | 0 | 0 |
| 45      | 47       | 1       | 0 | 0 | 0 | 0 | 0 | 0 | 0 | 0 | 0 | 0 | 0 | 0 | 0 |
| 45      | 48       | 1       | 0 | 0 | 0 | 0 | 0 | 0 | 0 | 0 | 0 | 0 | 0 | 0 | 0 |
| 48      | 49       | 1       | 0 | 0 | 0 | 0 | 0 | 0 | 0 | 0 | 0 | 0 | 0 | 0 | 0 |
| 49      | 50       | 1       | 0 | 0 | 0 | 0 | 0 | 0 | 0 | 0 | 0 | 0 | 0 | 0 | 0 |
| 49      | 51       | 1       | 0 | 0 | 0 | 0 | 0 | 0 | 0 | 0 | 0 | 0 | 0 | 0 | 0 |
| 49      | 52       | 1       | 0 | 0 | 0 | 0 | 0 | 0 | 0 | 0 | 0 | 0 | 0 | 0 | 0 |
| 52      | 53       | 1       | 0 | 0 | 0 | 0 | 0 | 0 | 0 | 0 | 0 | 0 | 0 | 0 | 0 |
| 52      | 54       | 1       | 0 | 0 | 0 | 0 | 0 | 0 | 0 | 0 | 0 | 0 | 0 | 0 | 0 |
| 52      | 55       | 1       | 0 | 0 | 0 | 0 | 0 | 0 | 0 | 0 | 0 | 0 | 0 | 0 | 0 |
| 55      | 56       | 1       | 0 | 0 | 0 | 0 | 0 | 0 | 0 | 0 | 0 | 0 | 0 | 0 | 0 |
| 55      | 57       | 1       | 0 | 0 | 0 | 0 | 0 | 0 | 0 | 0 | 0 | 0 | 0 | 0 | 0 |
| 55      | 58       | 1       | 0 | 0 | 0 | 0 | 0 | 0 | 0 | 0 | 0 | 0 | 0 | 0 | 0 |
| 58      | 59       | 1       | 0 | 0 | 0 | 0 | 0 | 0 | 0 | 0 | 0 | 0 | 0 | 0 | 0 |
| 58      | 60       | 1       | 0 | 0 | 0 | 0 | 0 | 0 | 0 | 0 | 0 | 0 | 0 | 0 | 0 |
| 58      | 61       | 1       | 0 | 0 | 0 | 0 | 0 | 0 | 0 | 0 | 0 | 0 | 0 | 0 | 0 |
| 61      | 62       | 1       | 0 | 0 | 0 | 0 | 0 | 0 | 0 | 0 | 0 | 0 | 0 | 0 | 0 |
| 61      | 63       | 1       | 0 | 0 | 0 | 0 | 0 | 0 | 0 | 0 | 0 | 0 | 0 | 0 | 0 |
| 61      | 64       | 1       | 0 | 0 | 0 | 0 | 0 | 0 | 0 | 0 | 0 | 0 | 0 | 0 | 0 |
| 64      | 65       | 1       | 0 | 0 | 0 | 0 | 0 | 0 | 0 | 0 | 0 | 0 | 0 | 0 | 0 |
| 64      | 66       | 1       | 0 | 0 | 0 | 0 | 0 | 0 | 0 | 0 | 0 | 0 | 0 | 0 | 0 |
| 64      | 67       | 1       | 0 | 0 | 0 | 0 | 0 | 0 | 0 | 0 | 0 | 0 | 0 | 0 | 0 |
| 67      | 68       | 1       | 0 | 0 | 0 | 0 | 0 | 0 | 0 | 0 | 0 | 0 | 0 | 0 | 0 |
| 68      | 69       | 1       | 0 | 0 | 0 | 0 | 0 | 0 | 0 | 0 | 0 | 0 | 0 | 0 | 0 |
| 68      | 70       | 1       | 0 | 0 | 0 | 0 | 0 | 0 | 0 | 0 | 0 | 0 | 0 | 0 | 0 |

|     |     |   |   |   |   |   |
|-----|-----|---|---|---|---|---|
| 71  | 72  | 1 | 0 | 0 | 0 | 0 |
| 71  | 73  | 1 | 0 | 0 | 0 | 0 |
| 71  | 74  | 1 | 0 | 0 | 0 | 0 |
| 71  | 75  | 1 | 0 | 0 | 0 | 0 |
| 75  | 76  | 1 | 0 | 0 | 0 | 0 |
| 75  | 85  | 1 | 0 | 0 | 0 | 0 |
| 76  | 77  | 1 | 0 | 0 | 0 | 0 |
| 76  | 78  | 1 | 0 | 0 | 0 | 0 |
| 76  | 79  | 1 | 0 | 0 | 0 | 0 |
| 79  | 80  | 1 | 0 | 0 | 0 | 0 |
| 79  | 81  | 1 | 0 | 0 | 0 | 0 |
| 79  | 82  | 1 | 0 | 0 | 0 | 0 |
| 82  | 83  | 1 | 0 | 0 | 0 | 0 |
| 82  | 84  | 1 | 0 | 0 | 0 | 0 |
| 82  | 89  | 1 | 0 | 0 | 0 | 0 |
| 85  | 86  | 1 | 0 | 0 | 0 | 0 |
| 85  | 87  | 1 | 0 | 0 | 0 | 0 |
| 85  | 88  | 1 | 0 | 0 | 0 | 0 |
| 89  | 105 | 1 | 0 | 0 | 0 | 0 |
| 90  | 91  | 1 | 0 | 0 | 0 | 0 |
| 90  | 92  | 1 | 0 | 0 | 0 | 0 |
| 90  | 93  | 1 | 0 | 0 | 0 | 0 |
| 90  | 137 | 1 | 0 | 0 | 0 | 0 |
| 93  | 94  | 1 | 0 | 0 | 0 | 0 |
| 94  | 95  | 1 | 0 | 0 | 0 | 0 |
| 94  | 101 | 2 | 0 | 0 | 0 | 0 |
| 95  | 96  | 1 | 0 | 0 | 0 | 0 |
| 95  | 97  | 1 | 0 | 0 | 0 | 0 |
| 95  | 98  | 1 | 0 | 0 | 0 | 0 |
| 98  | 99  | 1 | 0 | 0 | 0 | 0 |
| 98  | 100 | 1 | 0 | 0 | 0 | 0 |
| 98  | 158 | 1 | 0 | 0 | 0 | 0 |
| 102 | 103 | 1 | 0 | 0 | 0 | 0 |
| 102 | 104 | 1 | 0 | 0 | 0 | 0 |
| 102 | 112 | 1 | 0 | 0 | 0 | 0 |
| 102 | 114 | 1 | 0 | 0 | 0 | 0 |
| 105 | 106 | 1 | 0 | 0 | 0 | 0 |
| 105 | 107 | 1 | 0 | 0 | 0 | 0 |
| 105 | 108 | 1 | 0 | 0 | 0 | 0 |
| 108 | 109 | 1 | 0 | 0 | 0 | 0 |
| 108 | 110 | 1 | 0 | 0 | 0 | 0 |
| 108 | 111 | 1 | 0 | 0 | 0 | 0 |
| 111 | 112 | 1 | 0 | 0 | 0 | 0 |
| 111 | 113 | 2 | 0 | 0 | 0 | 0 |
| 114 | 115 | 1 | 0 | 0 | 0 | 0 |
| 114 | 116 | 1 | 0 | 0 | 0 | 0 |
| 114 | 117 | 1 | 0 | 0 | 0 | 0 |
| 117 | 118 | 1 | 0 | 0 | 0 | 0 |
| 118 | 119 | 1 | 0 | 0 | 0 | 0 |
| 118 | 120 | 1 | 0 | 0 | 0 | 0 |
| 118 | 121 | 1 | 0 | 0 | 0 | 0 |
| 121 | 122 | 1 | 0 | 0 | 0 | 0 |
| 121 | 123 | 1 | 0 | 0 | 0 | 0 |
| 121 | 124 | 1 | 0 | 0 | 0 | 0 |
| 124 | 125 | 1 | 0 | 0 | 0 | 0 |
| 124 | 126 | 1 | 0 | 0 | 0 | 0 |
| 124 | 127 | 1 | 0 | 0 | 0 | 0 |
| 127 | 128 | 1 | 0 | 0 | 0 | 0 |
| 127 | 129 | 1 | 0 | 0 | 0 | 0 |
| 127 | 130 | 1 | 0 | 0 | 0 | 0 |
| 130 | 131 | 1 | 0 | 0 | 0 | 0 |
| 130 | 132 | 1 | 0 | 0 | 0 | 0 |
| 130 | 133 | 1 | 0 | 0 | 0 | 0 |
| 133 | 134 | 1 | 0 | 0 | 0 | 0 |
| 133 | 135 | 1 | 0 | 0 | 0 | 0 |
| 133 | 136 | 1 | 0 | 0 | 0 | 0 |
| 136 | 137 | 1 | 0 | 0 | 0 | 0 |
| 137 | 138 | 1 | 0 | 0 | 0 | 0 |
| 137 | 139 | 1 | 0 | 0 | 0 | 0 |
| 140 | 141 | 1 | 0 | 0 | 0 | 0 |
| 140 | 142 | 1 | 0 | 0 | 0 | 0 |
| 140 | 143 | 1 | 0 | 0 | 0 | 0 |
| 140 | 144 | 1 | 0 | 0 | 0 | 0 |
| 144 | 145 | 1 | 0 | 0 | 0 | 0 |
| 144 | 154 | 1 | 0 | 0 | 0 | 0 |
| 145 | 146 | 1 | 0 | 0 | 0 | 0 |
| 145 | 147 | 1 | 0 | 0 | 0 | 0 |
| 145 | 148 | 1 | 0 | 0 | 0 | 0 |
| 148 | 149 | 1 | 0 | 0 | 0 | 0 |
| 148 | 150 | 1 | 0 | 0 | 0 | 0 |
| 148 | 151 | 1 | 0 | 0 | 0 | 0 |

|        |   |   |   |   |   |
|--------|---|---|---|---|---|
| 151152 | 1 | 0 | 0 | 0 | 0 |
| 151153 | 1 | 0 | 0 | 0 | 0 |
| 151158 | 1 | 0 | 0 | 0 | 0 |
| 154155 | 1 | 0 | 0 | 0 | 0 |
| 154156 | 1 | 0 | 0 | 0 | 0 |
| 154157 | 1 | 0 | 0 | 0 | 0 |
| 158174 | 1 | 0 | 0 | 0 | 0 |
| 159160 | 1 | 0 | 0 | 0 | 0 |
| 159161 | 1 | 0 | 0 | 0 | 0 |
| 159162 | 1 | 0 | 0 | 0 | 0 |
| 159206 | 1 | 0 | 0 | 0 | 0 |
| 162163 | 1 | 0 | 0 | 0 | 0 |
| 163164 | 1 | 0 | 0 | 0 | 0 |
| 163170 | 2 | 0 | 0 | 0 | 0 |
| 164165 | 1 | 0 | 0 | 0 | 0 |
| 164166 | 1 | 0 | 0 | 0 | 0 |
| 164167 | 1 | 0 | 0 | 0 | 0 |
| 167168 | 1 | 0 | 0 | 0 | 0 |
| 167169 | 1 | 0 | 0 | 0 | 0 |
| 167227 | 1 | 0 | 0 | 0 | 0 |
| 171172 | 1 | 0 | 0 | 0 | 0 |
| 171173 | 1 | 0 | 0 | 0 | 0 |
| 171181 | 1 | 0 | 0 | 0 | 0 |
| 171183 | 1 | 0 | 0 | 0 | 0 |
| 174175 | 1 | 0 | 0 | 0 | 0 |
| 174176 | 1 | 0 | 0 | 0 | 0 |
| 174177 | 1 | 0 | 0 | 0 | 0 |
| 177178 | 1 | 0 | 0 | 0 | 0 |
| 177179 | 1 | 0 | 0 | 0 | 0 |
| 177180 | 1 | 0 | 0 | 0 | 0 |
| 180181 | 1 | 0 | 0 | 0 | 0 |
| 180182 | 2 | 0 | 0 | 0 | 0 |
| 183184 | 1 | 0 | 0 | 0 | 0 |
| 183185 | 1 | 0 | 0 | 0 | 0 |
| 183186 | 1 | 0 | 0 | 0 | 0 |
| 186187 | 1 | 0 | 0 | 0 | 0 |
| 187188 | 1 | 0 | 0 | 0 | 0 |
| 187189 | 1 | 0 | 0 | 0 | 0 |
| 187190 | 1 | 0 | 0 | 0 | 0 |
| 190191 | 1 | 0 | 0 | 0 | 0 |
| 190192 | 1 | 0 | 0 | 0 | 0 |
| 190193 | 1 | 0 | 0 | 0 | 0 |
| 193194 | 1 | 0 | 0 | 0 | 0 |
| 193195 | 1 | 0 | 0 | 0 | 0 |
| 193196 | 1 | 0 | 0 | 0 | 0 |
| 196197 | 1 | 0 | 0 | 0 | 0 |
| 196198 | 1 | 0 | 0 | 0 | 0 |
| 196199 | 1 | 0 | 0 | 0 | 0 |
| 199200 | 1 | 0 | 0 | 0 | 0 |
| 199201 | 1 | 0 | 0 | 0 | 0 |
| 199202 | 1 | 0 | 0 | 0 | 0 |
| 202203 | 1 | 0 | 0 | 0 | 0 |
| 202204 | 1 | 0 | 0 | 0 | 0 |
| 202205 | 1 | 0 | 0 | 0 | 0 |
| 205206 | 1 | 0 | 0 | 0 | 0 |
| 206207 | 1 | 0 | 0 | 0 | 0 |
| 206208 | 1 | 0 | 0 | 0 | 0 |
| 209210 | 1 | 0 | 0 | 0 | 0 |
| 209211 | 1 | 0 | 0 | 0 | 0 |
| 209212 | 1 | 0 | 0 | 0 | 0 |
| 209213 | 1 | 0 | 0 | 0 | 0 |
| 213214 | 1 | 0 | 0 | 0 | 0 |
| 213223 | 1 | 0 | 0 | 0 | 0 |
| 214215 | 1 | 0 | 0 | 0 | 0 |
| 214216 | 1 | 0 | 0 | 0 | 0 |
| 214217 | 1 | 0 | 0 | 0 | 0 |
| 217218 | 1 | 0 | 0 | 0 | 0 |
| 217219 | 1 | 0 | 0 | 0 | 0 |
| 217220 | 1 | 0 | 0 | 0 | 0 |
| 220221 | 1 | 0 | 0 | 0 | 0 |
| 220222 | 1 | 0 | 0 | 0 | 0 |
| 220227 | 1 | 0 | 0 | 0 | 0 |
| 223224 | 1 | 0 | 0 | 0 | 0 |
| 223225 | 1 | 0 | 0 | 0 | 0 |
| 223226 | 1 | 0 | 0 | 0 | 0 |
| 227243 | 1 | 0 | 0 | 0 | 0 |
| 228229 | 1 | 0 | 0 | 0 | 0 |
| 228230 | 1 | 0 | 0 | 0 | 0 |
| 228231 | 1 | 0 | 0 | 0 | 0 |
| 228275 | 1 | 0 | 0 | 0 | 0 |
| 231232 | 1 | 0 | 0 | 0 | 0 |

|        |   |   |   |   |   |
|--------|---|---|---|---|---|
| 232233 | 1 | 0 | 0 | 0 | 0 |
| 232239 | 2 | 0 | 0 | 0 | 0 |
| 233234 | 1 | 0 | 0 | 0 | 0 |
| 233235 | 1 | 0 | 0 | 0 | 0 |
| 233236 | 1 | 0 | 0 | 0 | 0 |
| 236237 | 1 | 0 | 0 | 0 | 0 |
| 236238 | 1 | 0 | 0 | 0 | 0 |
| 236296 | 1 | 0 | 0 | 0 | 0 |
| 240241 | 1 | 0 | 0 | 0 | 0 |
| 240242 | 1 | 0 | 0 | 0 | 0 |
| 240250 | 1 | 0 | 0 | 0 | 0 |
| 240252 | 1 | 0 | 0 | 0 | 0 |
| 243244 | 1 | 0 | 0 | 0 | 0 |
| 243245 | 1 | 0 | 0 | 0 | 0 |
| 243246 | 1 | 0 | 0 | 0 | 0 |
| 246247 | 1 | 0 | 0 | 0 | 0 |
| 246248 | 1 | 0 | 0 | 0 | 0 |
| 246249 | 1 | 0 | 0 | 0 | 0 |
| 249250 | 1 | 0 | 0 | 0 | 0 |
| 249251 | 2 | 0 | 0 | 0 | 0 |
| 252253 | 1 | 0 | 0 | 0 | 0 |
| 252254 | 1 | 0 | 0 | 0 | 0 |
| 252255 | 1 | 0 | 0 | 0 | 0 |
| 255256 | 1 | 0 | 0 | 0 | 0 |
| 256257 | 1 | 0 | 0 | 0 | 0 |
| 256258 | 1 | 0 | 0 | 0 | 0 |
| 256259 | 1 | 0 | 0 | 0 | 0 |
| 259260 | 1 | 0 | 0 | 0 | 0 |
| 259261 | 1 | 0 | 0 | 0 | 0 |
| 259262 | 1 | 0 | 0 | 0 | 0 |
| 262263 | 1 | 0 | 0 | 0 | 0 |
| 262264 | 1 | 0 | 0 | 0 | 0 |
| 262265 | 1 | 0 | 0 | 0 | 0 |
| 265266 | 1 | 0 | 0 | 0 | 0 |
| 265267 | 1 | 0 | 0 | 0 | 0 |
| 265268 | 1 | 0 | 0 | 0 | 0 |
| 268269 | 1 | 0 | 0 | 0 | 0 |
| 268270 | 1 | 0 | 0 | 0 | 0 |
| 268271 | 1 | 0 | 0 | 0 | 0 |
| 271272 | 1 | 0 | 0 | 0 | 0 |
| 271273 | 1 | 0 | 0 | 0 | 0 |
| 271274 | 1 | 0 | 0 | 0 | 0 |
| 274275 | 1 | 0 | 0 | 0 | 0 |
| 275276 | 1 | 0 | 0 | 0 | 0 |
| 275277 | 1 | 0 | 0 | 0 | 0 |
| 278279 | 1 | 0 | 0 | 0 | 0 |
| 278280 | 1 | 0 | 0 | 0 | 0 |
| 278281 | 1 | 0 | 0 | 0 | 0 |
| 278282 | 1 | 0 | 0 | 0 | 0 |
| 282283 | 1 | 0 | 0 | 0 | 0 |
| 282292 | 1 | 0 | 0 | 0 | 0 |
| 283284 | 1 | 0 | 0 | 0 | 0 |
| 283285 | 1 | 0 | 0 | 0 | 0 |
| 283286 | 1 | 0 | 0 | 0 | 0 |
| 286287 | 1 | 0 | 0 | 0 | 0 |
| 286288 | 1 | 0 | 0 | 0 | 0 |
| 286289 | 1 | 0 | 0 | 0 | 0 |
| 289290 | 1 | 0 | 0 | 0 | 0 |
| 289291 | 1 | 0 | 0 | 0 | 0 |
| 289296 | 1 | 0 | 0 | 0 | 0 |
| 292293 | 1 | 0 | 0 | 0 | 0 |
| 292294 | 1 | 0 | 0 | 0 | 0 |
| 292295 | 1 | 0 | 0 | 0 | 0 |
| 296313 | 1 | 0 | 0 | 0 | 0 |
| 297298 | 1 | 0 | 0 | 0 | 0 |
| 297299 | 1 | 0 | 0 | 0 | 0 |
| 297300 | 1 | 0 | 0 | 0 | 0 |
| 297345 | 1 | 0 | 0 | 0 | 0 |
| 300301 | 1 | 0 | 0 | 0 | 0 |
| 301302 | 1 | 0 | 0 | 0 | 0 |
| 301309 | 2 | 0 | 0 | 0 | 0 |
| 302303 | 1 | 0 | 0 | 0 | 0 |
| 302304 | 1 | 0 | 0 | 0 | 0 |
| 302305 | 1 | 0 | 0 | 0 | 0 |
| 305306 | 1 | 0 | 0 | 0 | 0 |
| 305307 | 1 | 0 | 0 | 0 | 0 |
| 305308 | 1 | 0 | 0 | 0 | 0 |
| 310311 | 1 | 0 | 0 | 0 | 0 |
| 310312 | 1 | 0 | 0 | 0 | 0 |
| 310320 | 1 | 0 | 0 | 0 | 0 |
| 310322 | 1 | 0 | 0 | 0 | 0 |



|         |         |         |   |   |   |   |   |   |   |   |   |   |   |   |
|---------|---------|---------|---|---|---|---|---|---|---|---|---|---|---|---|
| 48.2210 | 26.6400 | 6.5000  | H | 0 | 0 | 0 | 0 | 0 | 0 | 0 | 0 | 0 | 0 | 0 |
| 48.4320 | 30.8910 | 2.7210  | C | 0 | 0 | 0 | 0 | 0 | 0 | 0 | 0 | 0 | 0 | 0 |
| 48.3770 | 30.2160 | 1.8570  | H | 0 | 0 | 0 | 0 | 0 | 0 | 0 | 0 | 0 | 0 | 0 |
| 49.4930 | 31.1370 | 2.8480  | H | 0 | 0 | 0 | 0 | 0 | 0 | 0 | 0 | 0 | 0 | 0 |
| 47.9340 | 30.2150 | 3.9960  | C | 0 | 0 | 0 | 0 | 0 | 0 | 0 | 0 | 0 | 0 | 0 |
| 48.0850 | 30.8690 | 4.8620  | H | 0 | 0 | 0 | 0 | 0 | 0 | 0 | 0 | 0 | 0 | 0 |
| 46.8690 | 29.9760 | 3.9130  | H | 0 | 0 | 0 | 0 | 0 | 0 | 0 | 0 | 0 | 0 | 0 |
| 48.6760 | 28.9280 | 4.2410  | C | 0 | 0 | 0 | 0 | 0 | 0 | 0 | 0 | 0 | 0 | 0 |
| 48.0200 | 28.2090 | 5.1970  | O | 0 | 0 | 0 | 0 | 0 | 0 | 0 | 0 | 0 | 0 | 0 |
| 49.7000 | 28.5810 | 3.6710  | O | 0 | 0 | 0 | 0 | 0 | 0 | 0 | 0 | 0 | 0 | 0 |
| 48.1470 | 25.8860 | 4.4800  | C | 0 | 0 | 0 | 0 | 0 | 0 | 0 | 0 | 0 | 0 | 0 |
| 47.0540 | 25.8520 | 4.4390  | H | 0 | 0 | 0 | 0 | 0 | 0 | 0 | 0 | 0 | 0 | 0 |
| 48.5100 | 26.1600 | 3.4830  | H | 0 | 0 | 0 | 0 | 0 | 0 | 0 | 0 | 0 | 0 | 0 |
| 48.6730 | 24.6180 | 4.8600  | O | 0 | 0 | 0 | 0 | 0 | 0 | 0 | 0 | 0 | 0 | 0 |
| 48.4330 | 23.5920 | 3.8950  | C | 0 | 0 | 0 | 0 | 0 | 0 | 0 | 0 | 0 | 0 | 0 |
| 48.6850 | 23.9500 | 2.8900  | H | 0 | 0 | 0 | 0 | 0 | 0 | 0 | 0 | 0 | 0 | 0 |
| 49.1250 | 22.7760 | 4.1300  | H | 0 | 0 | 0 | 0 | 0 | 0 | 0 | 0 | 0 | 0 | 0 |
| 46.9980 | 23.0690 | 3.9620  | C | 0 | 0 | 0 | 0 | 0 | 0 | 0 | 0 | 0 | 0 | 0 |
| 46.7710 | 22.7620 | 4.9900  | H | 0 | 0 | 0 | 0 | 0 | 0 | 0 | 0 | 0 | 0 | 0 |
| 46.2930 | 23.8740 | 3.7240  | H | 0 | 0 | 0 | 0 | 0 | 0 | 0 | 0 | 0 | 0 | 0 |
| 46.7800 | 21.9010 | 2.9980  | C | 0 | 0 | 0 | 0 | 0 | 0 | 0 | 0 | 0 | 0 | 0 |
| 47.0140 | 22.2220 | 1.9760  | H | 0 | 0 | 0 | 0 | 0 | 0 | 0 | 0 | 0 | 0 | 0 |
| 47.4710 | 21.0860 | 3.2470  | H | 0 | 0 | 0 | 0 | 0 | 0 | 0 | 0 | 0 | 0 | 0 |
| 45.3400 | 21.3840 | 3.0540  | C | 0 | 0 | 0 | 0 | 0 | 0 | 0 | 0 | 0 | 0 | 0 |
| 45.1100 | 21.0450 | 4.0720  | H | 0 | 0 | 0 | 0 | 0 | 0 | 0 | 0 | 0 | 0 | 0 |
| 44.6470 | 22.2020 | 2.8220  | H | 0 | 0 | 0 | 0 | 0 | 0 | 0 | 0 | 0 | 0 | 0 |
| 45.1200 | 20.2350 | 2.0700  | C | 0 | 0 | 0 | 0 | 0 | 0 | 0 | 0 | 0 | 0 | 0 |
| 45.3550 | 20.5610 | 1.0490  | H | 0 | 0 | 0 | 0 | 0 | 0 | 0 | 0 | 0 | 0 | 0 |
| 45.8120 | 19.4110 | 2.2880  | H | 0 | 0 | 0 | 0 | 0 | 0 | 0 | 0 | 0 | 0 | 0 |
| 43.6870 | 19.7120 | 2.1120  | C | 0 | 0 | 0 | 0 | 0 | 0 | 0 | 0 | 0 | 0 | 0 |
| 43.4570 | 19.3250 | 3.1110  | H | 0 | 0 | 0 | 0 | 0 | 0 | 0 | 0 | 0 | 0 | 0 |
| 42.9850 | 20.5170 | 1.8710  | H | 0 | 0 | 0 | 0 | 0 | 0 | 0 | 0 | 0 | 0 | 0 |
| 43.5680 | 18.6560 | 1.1560  | O | 0 | 0 | 0 | 0 | 0 | 0 | 0 | 0 | 0 | 0 | 0 |
| 42.2460 | 18.1220 | 1.0900  | C | 0 | 0 | 0 | 0 | 0 | 0 | 0 | 0 | 0 | 0 | 0 |
| 41.7700 | 18.1160 | 2.0770  | H | 0 | 0 | 0 | 0 | 0 | 0 | 0 | 0 | 0 | 0 | 0 |
| 42.3330 | 17.0720 | 0.7890  | H | 0 | 0 | 0 | 0 | 0 | 0 | 0 | 0 | 0 | 0 | 0 |
| 38.7530 | 16.6180 | 6.4410  | C | 0 | 0 | 0 | 0 | 0 | 0 | 0 | 0 | 0 | 0 | 0 |
| 38.0250 | 15.7990 | 6.5140  | H | 0 | 0 | 0 | 0 | 0 | 0 | 0 | 0 | 0 | 0 | 0 |
| 39.7240 | 16.1680 | 6.6890  | H | 0 | 0 | 0 | 0 | 0 | 0 | 0 | 0 | 0 | 0 | 0 |
| 38.7520 | 17.1730 | 5.0720  | N | 0 | 0 | 0 | 0 | 0 | 0 | 0 | 0 | 0 | 0 | 0 |
| 38.7820 | 16.0460 | 4.1080  | C | 0 | 0 | 0 | 0 | 0 | 0 | 0 | 0 | 0 | 0 | 0 |
| 39.7190 | 15.4880 | 4.2280  | H | 0 | 0 | 0 | 0 | 0 | 0 | 0 | 0 | 0 | 0 | 0 |
| 37.9670 | 15.3500 | 4.3490  | H | 0 | 0 | 0 | 0 | 0 | 0 | 0 | 0 | 0 | 0 | 0 |
| 38.5760 | 16.4790 | 2.6400  | C | 0 | 0 | 0 | 0 | 0 | 0 | 0 | 0 | 0 | 0 | 0 |
| 37.6070 | 16.9910 | 2.5890  | H | 0 | 0 | 0 | 0 | 0 | 0 | 0 | 0 | 0 | 0 | 0 |
| 39.3440 | 17.2010 | 2.3510  | H | 0 | 0 | 0 | 0 | 0 | 0 | 0 | 0 | 0 | 0 | 0 |
| 38.5780 | 15.3540 | 1.6940  | N | 0 | 0 | 3 | 0 | 0 | 0 | 0 | 0 | 0 | 0 | 0 |
| 39.8920 | 18.0920 | 4.8690  | C | 0 | 0 | 0 | 0 | 0 | 0 | 0 | 0 | 0 | 0 | 0 |
| 40.4440 | 18.2810 | 5.7990  | H | 0 | 0 | 0 | 0 | 0 | 0 | 0 | 0 | 0 | 0 | 0 |
| 40.6550 | 17.6700 | 4.2030  | H | 0 | 0 | 0 | 0 | 0 | 0 | 0 | 0 | 0 | 0 | 0 |
| 38.3580 | 17.6430 | 7.5070  | C | 0 | 0 | 0 | 0 | 0 | 0 | 0 | 0 | 0 | 0 | 0 |
| 39.0560 | 18.4830 | 7.5510  | H | 0 | 0 | 0 | 0 | 0 | 0 | 0 | 0 | 0 | 0 | 0 |
| 37.3510 | 18.0290 | 7.3170  | H | 0 | 0 | 0 | 0 | 0 | 0 | 0 | 0 | 0 | 0 | 0 |
| 38.3630 | 17.0000 | 8.7770  | O | 0 | 0 | 0 | 0 | 0 | 0 | 0 | 0 | 0 | 0 | 0 |
| 38.0660 | 17.6560 | 9.4320  | H | 0 | 0 | 0 | 0 | 0 | 0 | 0 | 0 | 0 | 0 | 0 |
| 39.4140 | 19.4430 | 4.3270  | C | 0 | 0 | 0 | 0 | 0 | 0 | 0 | 0 | 0 | 0 | 0 |
| 38.8990 | 19.3330 | 3.3680  | H | 0 | 0 | 0 | 0 | 0 | 0 | 0 | 0 | 0 | 0 | 0 |
| 38.7340 | 19.9240 | 5.0390  | H | 0 | 0 | 0 | 0 | 0 | 0 | 0 | 0 | 0 | 0 | 0 |
| 40.5350 | 20.3010 | 4.1310  | O | 0 | 0 | 0 | 0 | 0 | 0 | 0 | 0 | 0 | 0 | 0 |
| 40.1830 | 21.1760 | 3.8890  | H | 0 | 0 | 0 | 0 | 0 | 0 | 0 | 0 | 0 | 0 | 0 |
| 39.0860 | 4.2360  | 9.3020  | C | 0 | 0 | 0 | 0 | 0 | 0 | 0 | 0 | 0 | 0 | 0 |
| 39.3380 | 3.5420  | 8.4910  | H | 0 | 0 | 0 | 0 | 0 | 0 | 0 | 0 | 0 | 0 | 0 |
| 39.2370 | 5.2590  | 8.9450  | H | 0 | 0 | 0 | 0 | 0 | 0 | 0 | 0 | 0 | 0 | 0 |
| 37.7170 | 4.0800  | 9.6980  | O | 0 | 0 | 0 | 0 | 0 | 0 | 0 | 0 | 0 | 0 | 0 |
| 36.8110 | 4.0670  | 8.6800  | C | 0 | 0 | 0 | 0 | 0 | 0 | 0 | 0 | 0 | 0 | 0 |
| 35.4260 | 3.8220  | 9.2200  | C | 0 | 0 | 0 | 0 | 0 | 0 | 0 | 0 | 0 | 0 | 0 |
| 35.4100 | 3.9720  | 10.3050 | H | 0 | 0 | 0 | 0 | 0 | 0 | 0 | 0 | 0 | 0 | 0 |
| 34.7710 | 4.5990  | 8.8070  | H | 0 | 0 | 0 | 0 | 0 | 0 | 0 | 0 | 0 | 0 | 0 |
| 34.9050 | 2.4370  | 8.8330  | C | 0 | 0 | 0 | 0 | 0 | 0 | 0 | 0 | 0 | 0 | 0 |
| 34.7740 | 2.4350  | 7.7430  | H | 0 | 0 | 0 | 0 | 0 | 0 | 0 | 0 | 0 | 0 | 0 |
| 33.9070 | 2.3100  | 9.2710  | H | 0 | 0 | 0 | 0 | 0 | 0 | 0 | 0 | 0 | 0 | 0 |
| 37.0680 | 4.2260  | 7.4940  | O | 0 | 0 | 0 | 0 | 0 | 0 | 0 | 0 | 0 | 0 | 0 |
| 42.7480 | 12.0460 | 3.6170  | C | 0 | 0 | 0 | 0 | 0 | 0 | 0 | 0 | 0 | 0 | 0 |
| 43.3860 | 12.0240 | 2.7250  | H | 0 | 0 | 0 | 0 | 0 | 0 | 0 | 0 | 0 | 0 | 0 |
| 43.2980 | 12.6290 | 4.3650  | H | 0 | 0 | 0 | 0 | 0 | 0 | 0 | 0 | 0 | 0 | 0 |
| 39.8520 | 14.6290 | 1.6130  | C | 0 | 0 | 0 | 0 | 0 | 0 | 0 | 0 | 0 | 0 | 0 |
| 40.2680 | 14.6290 | 0.5980  | H | 0 | 0 | 0 | 0 | 0 | 0 | 0 | 0 | 0 | 0 | 0 |
| 40.6290 | 15.0970 | 2.2290  | H | 0 | 0 | 0 | 0 | 0 | 0 | 0 | 0 | 0 | 0 | 0 |
| 39.6120 | 13.1910 | 2.0560  | C | 0 | 0 | 0 | 0 | 0 | 0 | 0 | 0 | 0 | 0 | 0 |
| 39.1010 | 13.1380 | 3.0250  | H | 0 | 0 | 0 | 0 | 0 | 0 | 0 | 0 | 0 | 0 | 0 |
| 38.9720 | 12.6600 | 1.3400  | H | 0 | 0 | 0 | 0 | 0 | 0 | 0 | 0 | 0 | 0 | 0 |









|         |         |         |   |   |   |   |   |   |   |   |   |   |   |   |   |
|---------|---------|---------|---|---|---|---|---|---|---|---|---|---|---|---|---|
| 56.5280 | -3.0270 | 35.0840 | H | 0 | 0 | 0 | 0 | 0 | 0 | 0 | 0 | 0 | 0 | 0 | 0 |
| 56.6080 | -4.0140 | 36.5280 | H | 0 | 0 | 0 | 0 | 0 | 0 | 0 | 0 | 0 | 0 | 0 | 0 |
| 57.7330 | -2.1820 | 36.6560 | C | 0 | 0 | 0 | 0 | 0 | 0 | 0 | 0 | 0 | 0 | 0 | 0 |
| 58.3820 | -2.5240 | 37.4710 | H | 0 | 0 | 0 | 0 | 0 | 0 | 0 | 0 | 0 | 0 | 0 | 0 |
| 58.3060 | -1.5210 | 35.9970 | H | 0 | 0 | 0 | 0 | 0 | 0 | 0 | 0 | 0 | 0 | 0 | 0 |
| 56.6150 | -1.4810 | 37.1990 | O | 0 | 0 | 0 | 0 | 0 | 0 | 0 | 0 | 0 | 0 | 0 | 0 |
| 56.9840 | -0.3600 | 38.0010 | C | 0 | 0 | 0 | 0 | 0 | 0 | 0 | 0 | 0 | 0 | 0 | 0 |
| 57.8400 | -0.6010 | 38.6440 | H | 0 | 0 | 0 | 0 | 0 | 0 | 0 | 0 | 0 | 0 | 0 | 0 |
| 56.1470 | -0.1590 | 38.6780 | H | 0 | 0 | 0 | 0 | 0 | 0 | 0 | 0 | 0 | 0 | 0 | 0 |
| 1       | 2       | 1       | 0 | 0 | 0 | 0 |   |   |   |   |   |   |   |   |   |
| 1       | 3       | 1       | 0 | 0 | 0 | 0 |   |   |   |   |   |   |   |   |   |
| 1       | 4       | 1       | 0 | 0 | 0 | 0 |   |   |   |   |   |   |   |   |   |
| 1       | 16      | 1       | 0 | 0 | 0 | 0 |   |   |   |   |   |   |   |   |   |
| 4       | 5       | 1       | 0 | 0 | 0 | 0 |   |   |   |   |   |   |   |   |   |
| 4       | 13      | 1       | 0 | 0 | 0 | 0 |   |   |   |   |   |   |   |   |   |
| 5       | 6       | 1       | 0 | 0 | 0 | 0 |   |   |   |   |   |   |   |   |   |
| 5       | 7       | 1       | 0 | 0 | 0 | 0 |   |   |   |   |   |   |   |   |   |
| 5       | 8       | 1       | 0 | 0 | 0 | 0 |   |   |   |   |   |   |   |   |   |
| 8       | 9       | 1       | 0 | 0 | 0 | 0 |   |   |   |   |   |   |   |   |   |
| 8       | 10      | 1       | 0 | 0 | 0 | 0 |   |   |   |   |   |   |   |   |   |
| 8       | 11      | 1       | 0 | 0 | 0 | 0 |   |   |   |   |   |   |   |   |   |
| 11      | 12      | 1       | 0 | 0 | 0 | 0 |   |   |   |   |   |   |   |   |   |
| 11      | 41      | 1       | 0 | 0 | 0 | 0 |   |   |   |   |   |   |   |   |   |
| 13      | 14      | 1       | 0 | 0 | 0 | 0 |   |   |   |   |   |   |   |   |   |
| 13      | 15      | 1       | 0 | 0 | 0 | 0 |   |   |   |   |   |   |   |   |   |
| 13      | 21      | 1       | 0 | 0 | 0 | 0 |   |   |   |   |   |   |   |   |   |
| 16      | 17      | 1       | 0 | 0 | 0 | 0 |   |   |   |   |   |   |   |   |   |
| 16      | 18      | 1       | 0 | 0 | 0 | 0 |   |   |   |   |   |   |   |   |   |
| 16      | 19      | 1       | 0 | 0 | 0 | 0 |   |   |   |   |   |   |   |   |   |
| 19      | 20      | 1       | 0 | 0 | 0 | 0 |   |   |   |   |   |   |   |   |   |
| 21      | 22      | 1       | 0 | 0 | 0 | 0 |   |   |   |   |   |   |   |   |   |
| 21      | 23      | 1       | 0 | 0 | 0 | 0 |   |   |   |   |   |   |   |   |   |
| 21      | 24      | 1       | 0 | 0 | 0 | 0 |   |   |   |   |   |   |   |   |   |
| 24      | 25      | 1       | 0 | 0 | 0 | 0 |   |   |   |   |   |   |   |   |   |
| 26      | 27      | 1       | 0 | 0 | 0 | 0 |   |   |   |   |   |   |   |   |   |
| 26      | 28      | 1       | 0 | 0 | 0 | 0 |   |   |   |   |   |   |   |   |   |
| 26      | 29      | 1       | 0 | 0 | 0 | 0 |   |   |   |   |   |   |   |   |   |
| 26      | 73      | 1       | 0 | 0 | 0 | 0 |   |   |   |   |   |   |   |   |   |
| 29      | 30      | 1       | 0 | 0 | 0 | 0 |   |   |   |   |   |   |   |   |   |
| 30      | 31      | 1       | 0 | 0 | 0 | 0 |   |   |   |   |   |   |   |   |   |
| 30      | 37      | 2       | 0 | 0 | 0 | 0 |   |   |   |   |   |   |   |   |   |
| 31      | 32      | 1       | 0 | 0 | 0 | 0 |   |   |   |   |   |   |   |   |   |
| 31      | 33      | 1       | 0 | 0 | 0 | 0 |   |   |   |   |   |   |   |   |   |
| 31      | 34      | 1       | 0 | 0 | 0 | 0 |   |   |   |   |   |   |   |   |   |
| 34      | 35      | 1       | 0 | 0 | 0 | 0 |   |   |   |   |   |   |   |   |   |
| 34      | 36      | 1       | 0 | 0 | 0 | 0 |   |   |   |   |   |   |   |   |   |
| 34      | 86      | 1       | 0 | 0 | 0 | 0 |   |   |   |   |   |   |   |   |   |
| 38      | 39      | 1       | 0 | 0 | 0 | 0 |   |   |   |   |   |   |   |   |   |
| 38      | 40      | 1       | 0 | 0 | 0 | 0 |   |   |   |   |   |   |   |   |   |
| 38      | 48      | 1       | 0 | 0 | 0 | 0 |   |   |   |   |   |   |   |   |   |
| 38      | 50      | 1       | 0 | 0 | 0 | 0 |   |   |   |   |   |   |   |   |   |
| 41      | 42      | 1       | 0 | 0 | 0 | 0 |   |   |   |   |   |   |   |   |   |
| 41      | 43      | 1       | 0 | 0 | 0 | 0 |   |   |   |   |   |   |   |   |   |
| 41      | 44      | 1       | 0 | 0 | 0 | 0 |   |   |   |   |   |   |   |   |   |
| 44      | 45      | 1       | 0 | 0 | 0 | 0 |   |   |   |   |   |   |   |   |   |
| 44      | 46      | 1       | 0 | 0 | 0 | 0 |   |   |   |   |   |   |   |   |   |
| 44      | 47      | 1       | 0 | 0 | 0 | 0 |   |   |   |   |   |   |   |   |   |
| 47      | 48      | 1       | 0 | 0 | 0 | 0 |   |   |   |   |   |   |   |   |   |
| 47      | 49      | 2       | 0 | 0 | 0 | 0 |   |   |   |   |   |   |   |   |   |
| 50      | 51      | 1       | 0 | 0 | 0 | 0 |   |   |   |   |   |   |   |   |   |
| 50      | 52      | 1       | 0 | 0 | 0 | 0 |   |   |   |   |   |   |   |   |   |
| 50      | 53      | 1       | 0 | 0 | 0 | 0 |   |   |   |   |   |   |   |   |   |
| 53      | 54      | 1       | 0 | 0 | 0 | 0 |   |   |   |   |   |   |   |   |   |
| 54      | 55      | 1       | 0 | 0 | 0 | 0 |   |   |   |   |   |   |   |   |   |
| 54      | 56      | 1       | 0 | 0 | 0 | 0 |   |   |   |   |   |   |   |   |   |
| 54      | 57      | 1       | 0 | 0 | 0 | 0 |   |   |   |   |   |   |   |   |   |
| 57      | 58      | 1       | 0 | 0 | 0 | 0 |   |   |   |   |   |   |   |   |   |
| 57      | 59      | 1       | 0 | 0 | 0 | 0 |   |   |   |   |   |   |   |   |   |
| 57      | 60      | 1       | 0 | 0 | 0 | 0 |   |   |   |   |   |   |   |   |   |
| 60      | 61      | 1       | 0 | 0 | 0 | 0 |   |   |   |   |   |   |   |   |   |
| 60      | 62      | 1       | 0 | 0 | 0 | 0 |   |   |   |   |   |   |   |   |   |
| 60      | 63      | 1       | 0 | 0 | 0 | 0 |   |   |   |   |   |   |   |   |   |
| 63      | 64      | 1       | 0 | 0 | 0 | 0 |   |   |   |   |   |   |   |   |   |
| 63      | 65      | 1       | 0 | 0 | 0 | 0 |   |   |   |   |   |   |   |   |   |
| 63      | 66      | 1       | 0 | 0 | 0 | 0 |   |   |   |   |   |   |   |   |   |
| 66      | 67      | 1       | 0 | 0 | 0 | 0 |   |   |   |   |   |   |   |   |   |
| 66      | 68      | 1       | 0 | 0 | 0 | 0 |   |   |   |   |   |   |   |   |   |
| 66      | 69      | 1       | 0 | 0 | 0 | 0 |   |   |   |   |   |   |   |   |   |
| 69      | 70      | 1       | 0 | 0 | 0 | 0 |   |   |   |   |   |   |   |   |   |
| 69      | 71      | 1       | 0 | 0 | 0 | 0 |   |   |   |   |   |   |   |   |   |
| 69      | 72      | 1       | 0 | 0 | 0 | 0 |   |   |   |   |   |   |   |   |   |

|     |     |   |   |   |   |   |
|-----|-----|---|---|---|---|---|
| 72  | 73  | 1 | 0 | 0 | 0 | 0 |
| 73  | 74  | 1 | 0 | 0 | 0 | 0 |
| 73  | 75  | 1 | 0 | 0 | 0 | 0 |
| 76  | 77  | 1 | 0 | 0 | 0 | 0 |
| 76  | 78  | 1 | 0 | 0 | 0 | 0 |
| 76  | 79  | 1 | 0 | 0 | 0 | 0 |
| 76  | 90  | 1 | 0 | 0 | 0 | 0 |
| 79  | 80  | 1 | 0 | 0 | 0 | 0 |
| 79  | 87  | 1 | 0 | 0 | 0 | 0 |
| 80  | 81  | 1 | 0 | 0 | 0 | 0 |
| 80  | 82  | 1 | 0 | 0 | 0 | 0 |
| 80  | 83  | 1 | 0 | 0 | 0 | 0 |
| 83  | 84  | 1 | 0 | 0 | 0 | 0 |
| 83  | 85  | 1 | 0 | 0 | 0 | 0 |
| 83  | 86  | 1 | 0 | 0 | 0 | 0 |
| 86  | 115 | 1 | 0 | 0 | 0 | 0 |
| 87  | 88  | 1 | 0 | 0 | 0 | 0 |
| 87  | 89  | 1 | 0 | 0 | 0 | 0 |
| 87  | 95  | 1 | 0 | 0 | 0 | 0 |
| 90  | 91  | 1 | 0 | 0 | 0 | 0 |
| 90  | 92  | 1 | 0 | 0 | 0 | 0 |
| 90  | 93  | 1 | 0 | 0 | 0 | 0 |
| 93  | 94  | 1 | 0 | 0 | 0 | 0 |
| 95  | 96  | 1 | 0 | 0 | 0 | 0 |
| 95  | 97  | 1 | 0 | 0 | 0 | 0 |
| 95  | 98  | 1 | 0 | 0 | 0 | 0 |
| 98  | 99  | 1 | 0 | 0 | 0 | 0 |
| 100 | 101 | 1 | 0 | 0 | 0 | 0 |
| 100 | 102 | 1 | 0 | 0 | 0 | 0 |
| 100 | 103 | 1 | 0 | 0 | 0 | 0 |
| 100 | 147 | 1 | 0 | 0 | 0 | 0 |
| 103 | 104 | 1 | 0 | 0 | 0 | 0 |
| 104 | 105 | 1 | 0 | 0 | 0 | 0 |
| 104 | 111 | 2 | 0 | 0 | 0 | 0 |
| 105 | 106 | 1 | 0 | 0 | 0 | 0 |
| 105 | 107 | 1 | 0 | 0 | 0 | 0 |
| 105 | 108 | 1 | 0 | 0 | 0 | 0 |
| 108 | 109 | 1 | 0 | 0 | 0 | 0 |
| 108 | 110 | 1 | 0 | 0 | 0 | 0 |
| 108 | 160 | 1 | 0 | 0 | 0 | 0 |
| 112 | 113 | 1 | 0 | 0 | 0 | 0 |
| 112 | 114 | 1 | 0 | 0 | 0 | 0 |
| 112 | 122 | 1 | 0 | 0 | 0 | 0 |
| 112 | 124 | 1 | 0 | 0 | 0 | 0 |
| 115 | 116 | 1 | 0 | 0 | 0 | 0 |
| 115 | 117 | 1 | 0 | 0 | 0 | 0 |
| 115 | 118 | 1 | 0 | 0 | 0 | 0 |
| 118 | 119 | 1 | 0 | 0 | 0 | 0 |
| 118 | 120 | 1 | 0 | 0 | 0 | 0 |
| 118 | 121 | 1 | 0 | 0 | 0 | 0 |
| 121 | 122 | 1 | 0 | 0 | 0 | 0 |
| 121 | 123 | 2 | 0 | 0 | 0 | 0 |
| 124 | 125 | 1 | 0 | 0 | 0 | 0 |
| 124 | 126 | 1 | 0 | 0 | 0 | 0 |
| 124 | 127 | 1 | 0 | 0 | 0 | 0 |
| 127 | 128 | 1 | 0 | 0 | 0 | 0 |
| 128 | 129 | 1 | 0 | 0 | 0 | 0 |
| 128 | 130 | 1 | 0 | 0 | 0 | 0 |
| 128 | 131 | 1 | 0 | 0 | 0 | 0 |
| 131 | 132 | 1 | 0 | 0 | 0 | 0 |
| 131 | 133 | 1 | 0 | 0 | 0 | 0 |
| 131 | 134 | 1 | 0 | 0 | 0 | 0 |
| 134 | 135 | 1 | 0 | 0 | 0 | 0 |
| 134 | 136 | 1 | 0 | 0 | 0 | 0 |
| 134 | 137 | 1 | 0 | 0 | 0 | 0 |
| 137 | 138 | 1 | 0 | 0 | 0 | 0 |
| 137 | 139 | 1 | 0 | 0 | 0 | 0 |
| 137 | 140 | 1 | 0 | 0 | 0 | 0 |
| 140 | 141 | 1 | 0 | 0 | 0 | 0 |
| 140 | 142 | 1 | 0 | 0 | 0 | 0 |
| 140 | 143 | 1 | 0 | 0 | 0 | 0 |
| 143 | 144 | 1 | 0 | 0 | 0 | 0 |
| 143 | 145 | 1 | 0 | 0 | 0 | 0 |
| 143 | 146 | 1 | 0 | 0 | 0 | 0 |
| 146 | 147 | 1 | 0 | 0 | 0 | 0 |
| 147 | 148 | 1 | 0 | 0 | 0 | 0 |
| 147 | 149 | 1 | 0 | 0 | 0 | 0 |
| 150 | 151 | 1 | 0 | 0 | 0 | 0 |
| 150 | 152 | 1 | 0 | 0 | 0 | 0 |
| 150 | 153 | 1 | 0 | 0 | 0 | 0 |
| 150 | 164 | 1 | 0 | 0 | 0 | 0 |

|        |   |   |   |   |   |
|--------|---|---|---|---|---|
| 153154 | 1 | 0 | 0 | 0 | 0 |
| 153161 | 1 | 0 | 0 | 0 | 0 |
| 154155 | 1 | 0 | 0 | 0 | 0 |
| 154156 | 1 | 0 | 0 | 0 | 0 |
| 154157 | 1 | 0 | 0 | 0 | 0 |
| 157158 | 1 | 0 | 0 | 0 | 0 |
| 157159 | 1 | 0 | 0 | 0 | 0 |
| 157160 | 1 | 0 | 0 | 0 | 0 |
| 160189 | 1 | 0 | 0 | 0 | 0 |
| 161162 | 1 | 0 | 0 | 0 | 0 |
| 161163 | 1 | 0 | 0 | 0 | 0 |
| 161169 | 1 | 0 | 0 | 0 | 0 |
| 164165 | 1 | 0 | 0 | 0 | 0 |
| 164166 | 1 | 0 | 0 | 0 | 0 |
| 164167 | 1 | 0 | 0 | 0 | 0 |
| 167168 | 1 | 0 | 0 | 0 | 0 |
| 169170 | 1 | 0 | 0 | 0 | 0 |
| 169171 | 1 | 0 | 0 | 0 | 0 |
| 169172 | 1 | 0 | 0 | 0 | 0 |
| 172173 | 1 | 0 | 0 | 0 | 0 |
| 174175 | 1 | 0 | 0 | 0 | 0 |
| 174176 | 1 | 0 | 0 | 0 | 0 |
| 174177 | 1 | 0 | 0 | 0 | 0 |
| 174221 | 1 | 0 | 0 | 0 | 0 |
| 177178 | 1 | 0 | 0 | 0 | 0 |
| 178179 | 1 | 0 | 0 | 0 | 0 |
| 178185 | 2 | 0 | 0 | 0 | 0 |
| 179180 | 1 | 0 | 0 | 0 | 0 |
| 179181 | 1 | 0 | 0 | 0 | 0 |
| 179182 | 1 | 0 | 0 | 0 | 0 |
| 182183 | 1 | 0 | 0 | 0 | 0 |
| 182184 | 1 | 0 | 0 | 0 | 0 |
| 182234 | 1 | 0 | 0 | 0 | 0 |
| 186187 | 1 | 0 | 0 | 0 | 0 |
| 186188 | 1 | 0 | 0 | 0 | 0 |
| 186196 | 1 | 0 | 0 | 0 | 0 |
| 186198 | 1 | 0 | 0 | 0 | 0 |
| 189190 | 1 | 0 | 0 | 0 | 0 |
| 189191 | 1 | 0 | 0 | 0 | 0 |
| 189192 | 1 | 0 | 0 | 0 | 0 |
| 192193 | 1 | 0 | 0 | 0 | 0 |
| 192194 | 1 | 0 | 0 | 0 | 0 |
| 192195 | 1 | 0 | 0 | 0 | 0 |
| 195196 | 1 | 0 | 0 | 0 | 0 |
| 195197 | 2 | 0 | 0 | 0 | 0 |
| 198199 | 1 | 0 | 0 | 0 | 0 |
| 198200 | 1 | 0 | 0 | 0 | 0 |
| 198201 | 1 | 0 | 0 | 0 | 0 |
| 201202 | 1 | 0 | 0 | 0 | 0 |
| 202203 | 1 | 0 | 0 | 0 | 0 |
| 202204 | 1 | 0 | 0 | 0 | 0 |
| 202205 | 1 | 0 | 0 | 0 | 0 |
| 205206 | 1 | 0 | 0 | 0 | 0 |
| 205207 | 1 | 0 | 0 | 0 | 0 |
| 205208 | 1 | 0 | 0 | 0 | 0 |
| 208209 | 1 | 0 | 0 | 0 | 0 |
| 208210 | 1 | 0 | 0 | 0 | 0 |
| 208211 | 1 | 0 | 0 | 0 | 0 |
| 211212 | 1 | 0 | 0 | 0 | 0 |
| 211213 | 1 | 0 | 0 | 0 | 0 |
| 211214 | 1 | 0 | 0 | 0 | 0 |
| 214215 | 1 | 0 | 0 | 0 | 0 |
| 214216 | 1 | 0 | 0 | 0 | 0 |
| 214217 | 1 | 0 | 0 | 0 | 0 |
| 217218 | 1 | 0 | 0 | 0 | 0 |
| 217219 | 1 | 0 | 0 | 0 | 0 |
| 217220 | 1 | 0 | 0 | 0 | 0 |
| 220221 | 1 | 0 | 0 | 0 | 0 |
| 221222 | 1 | 0 | 0 | 0 | 0 |
| 221223 | 1 | 0 | 0 | 0 | 0 |
| 224225 | 1 | 0 | 0 | 0 | 0 |
| 224226 | 1 | 0 | 0 | 0 | 0 |
| 224227 | 1 | 0 | 0 | 0 | 0 |
| 224238 | 1 | 0 | 0 | 0 | 0 |
| 227228 | 1 | 0 | 0 | 0 | 0 |
| 227235 | 1 | 0 | 0 | 0 | 0 |
| 228229 | 1 | 0 | 0 | 0 | 0 |
| 228230 | 1 | 0 | 0 | 0 | 0 |
| 228231 | 1 | 0 | 0 | 0 | 0 |
| 231232 | 1 | 0 | 0 | 0 | 0 |
| 231233 | 1 | 0 | 0 | 0 | 0 |

|        |   |   |   |   |   |
|--------|---|---|---|---|---|
| 231234 | 1 | 0 | 0 | 0 | 0 |
| 234263 | 1 | 0 | 0 | 0 | 0 |
| 235236 | 1 | 0 | 0 | 0 | 0 |
| 235237 | 1 | 0 | 0 | 0 | 0 |
| 235243 | 1 | 0 | 0 | 0 | 0 |
| 238239 | 1 | 0 | 0 | 0 | 0 |
| 238240 | 1 | 0 | 0 | 0 | 0 |
| 238241 | 1 | 0 | 0 | 0 | 0 |
| 241242 | 1 | 0 | 0 | 0 | 0 |
| 243244 | 1 | 0 | 0 | 0 | 0 |
| 243245 | 1 | 0 | 0 | 0 | 0 |
| 243246 | 1 | 0 | 0 | 0 | 0 |
| 246247 | 1 | 0 | 0 | 0 | 0 |
| 248249 | 1 | 0 | 0 | 0 | 0 |
| 248250 | 1 | 0 | 0 | 0 | 0 |
| 248251 | 1 | 0 | 0 | 0 | 0 |
| 248295 | 1 | 0 | 0 | 0 | 0 |
| 251252 | 1 | 0 | 0 | 0 | 0 |
| 252253 | 1 | 0 | 0 | 0 | 0 |
| 252259 | 2 | 0 | 0 | 0 | 0 |
| 253254 | 1 | 0 | 0 | 0 | 0 |
| 253255 | 1 | 0 | 0 | 0 | 0 |
| 253256 | 1 | 0 | 0 | 0 | 0 |
| 256257 | 1 | 0 | 0 | 0 | 0 |
| 256258 | 1 | 0 | 0 | 0 | 0 |
| 256308 | 1 | 0 | 0 | 0 | 0 |
| 260261 | 1 | 0 | 0 | 0 | 0 |
| 260262 | 1 | 0 | 0 | 0 | 0 |
| 260270 | 1 | 0 | 0 | 0 | 0 |
| 260272 | 1 | 0 | 0 | 0 | 0 |
| 263264 | 1 | 0 | 0 | 0 | 0 |
| 263265 | 1 | 0 | 0 | 0 | 0 |
| 263266 | 1 | 0 | 0 | 0 | 0 |
| 266267 | 1 | 0 | 0 | 0 | 0 |
| 266268 | 1 | 0 | 0 | 0 | 0 |
| 266269 | 1 | 0 | 0 | 0 | 0 |
| 269270 | 1 | 0 | 0 | 0 | 0 |
| 269271 | 2 | 0 | 0 | 0 | 0 |
| 272273 | 1 | 0 | 0 | 0 | 0 |
| 272274 | 1 | 0 | 0 | 0 | 0 |
| 272275 | 1 | 0 | 0 | 0 | 0 |
| 275276 | 1 | 0 | 0 | 0 | 0 |
| 276277 | 1 | 0 | 0 | 0 | 0 |
| 276278 | 1 | 0 | 0 | 0 | 0 |
| 276279 | 1 | 0 | 0 | 0 | 0 |
| 279280 | 1 | 0 | 0 | 0 | 0 |
| 279281 | 1 | 0 | 0 | 0 | 0 |
| 279282 | 1 | 0 | 0 | 0 | 0 |
| 282283 | 1 | 0 | 0 | 0 | 0 |
| 282284 | 1 | 0 | 0 | 0 | 0 |
| 282285 | 1 | 0 | 0 | 0 | 0 |
| 285286 | 1 | 0 | 0 | 0 | 0 |
| 285287 | 1 | 0 | 0 | 0 | 0 |
| 285288 | 1 | 0 | 0 | 0 | 0 |
| 288289 | 1 | 0 | 0 | 0 | 0 |
| 288290 | 1 | 0 | 0 | 0 | 0 |
| 288291 | 1 | 0 | 0 | 0 | 0 |
| 291292 | 1 | 0 | 0 | 0 | 0 |
| 291293 | 1 | 0 | 0 | 0 | 0 |
| 291294 | 1 | 0 | 0 | 0 | 0 |
| 294295 | 1 | 0 | 0 | 0 | 0 |
| 295296 | 1 | 0 | 0 | 0 | 0 |
| 295297 | 1 | 0 | 0 | 0 | 0 |
| 298299 | 1 | 0 | 0 | 0 | 0 |
| 298300 | 1 | 0 | 0 | 0 | 0 |
| 298301 | 1 | 0 | 0 | 0 | 0 |
| 298312 | 1 | 0 | 0 | 0 | 0 |
| 301302 | 1 | 0 | 0 | 0 | 0 |
| 301309 | 1 | 0 | 0 | 0 | 0 |
| 302303 | 1 | 0 | 0 | 0 | 0 |
| 302304 | 1 | 0 | 0 | 0 | 0 |
| 302305 | 1 | 0 | 0 | 0 | 0 |
| 305306 | 1 | 0 | 0 | 0 | 0 |
| 305307 | 1 | 0 | 0 | 0 | 0 |
| 305308 | 1 | 0 | 0 | 0 | 0 |
| 308338 | 1 | 0 | 0 | 0 | 0 |
| 309310 | 1 | 0 | 0 | 0 | 0 |
| 309311 | 1 | 0 | 0 | 0 | 0 |
| 309317 | 1 | 0 | 0 | 0 | 0 |
| 312313 | 1 | 0 | 0 | 0 | 0 |
| 312314 | 1 | 0 | 0 | 0 | 0 |

```

312315 1 0 0 0 0
315316 1 0 0 0 0
317318 1 0 0 0 0
317319 1 0 0 0 0
317320 1 0 0 0 0
320321 1 0 0 0 0
322323 1 0 0 0 0
322324 1 0 0 0 0
322325 1 0 0 0 0
322370 1 0 0 0 0
325326 1 0 0 0 0
326327 1 0 0 0 0
326334 2 0 0 0 0
327328 1 0 0 0 0
327329 1 0 0 0 0
327330 1 0 0 0 0
330331 1 0 0 0 0
330332 1 0 0 0 0
330333 1 0 0 0 0
335336 1 0 0 0 0
335337 1 0 0 0 0
335345 1 0 0 0 0
335347 1 0 0 0 0
338339 1 0 0 0 0
338340 1 0 0 0 0
338341 1 0 0 0 0
341342 1 0 0 0 0
341343 1 0 0 0 0
341344 1 0 0 0 0
344345 1 0 0 0 0
344346 2 0 0 0 0
347348 1 0 0 0 0
347349 1 0 0 0 0
347350 1 0 0 0 0
350351 1 0 0 0 0
351352 1 0 0 0 0
351353 1 0 0 0 0
351354 1 0 0 0 0
354355 1 0 0 0 0
354356 1 0 0 0 0
354357 1 0 0 0 0
357358 1 0 0 0 0
357359 1 0 0 0 0
357360 1 0 0 0 0
360361 1 0 0 0 0
360362 1 0 0 0 0
360363 1 0 0 0 0
363364 1 0 0 0 0
363365 1 0 0 0 0
363366 1 0 0 0 0
366367 1 0 0 0 0
366368 1 0 0 0 0
366369 1 0 0 0 0
369370 1 0 0 0 0
370371 1 0 0 0 0
370372 1 0 0 0 0

```

```

M END
> <NAME>
U86_1

```

```

$$$$
U87_1
MOE2012 3D

```

```

387386 0 0 1 0 0 0 0 0999 V2000
50.4510 9.5420 -29.9490 C 0 0 0 0 0 0 0 0 0 0 0 0 0 0 0
51.3910 9.0940 -30.2940 H 0 0 0 0 0 0 0 0 0 0 0 0 0 0 0
50.5440 10.6110 -30.1830 H 0 0 0 0 0 0 0 0 0 0 0 0 0 0 0
49.2940 8.9380 -30.6440 N 0 0 0 0 0 0 0 0 0 0 0 0 0 0 0
48.1020 9.8020 -30.5140 C 0 0 0 0 0 0 0 0 0 0 0 0 0 0 0
48.0550 10.2400 -29.5100 H 0 0 0 0 0 0 0 0 0 0 0 0 0 0 0
48.1540 10.6470 -31.2140 H 0 0 0 0 0 0 0 0 0 0 0 0 0 0 0
46.8000 9.0110 -30.7130 C 0 0 0 0 0 0 0 0 0 0 0 0 0 0 0
46.7640 8.5640 -31.7130 H 0 0 0 0 0 0 0 0 0 0 0 0 0 0 0
46.7630 8.1850 -29.9900 H 0 0 0 0 0 0 0 0 0 0 0 0 0 0 0
45.5790 9.9170 -30.5230 C 0 0 0 0 0 0 0 0 0 0 0 0 0 0 0
45.6060 10.3560 -29.5180 H 0 0 0 0 0 0 0 0 0 0 0 0 0 0 0
45.6120 10.7330 -31.2540 H 0 0 0 0 0 0 0 0 0 0 0 0 0 0 0
49.6140 8.7070 -32.0690 C 0 0 0 0 0 0 0 0 0 0 0 0 0 0 0
48.7000 8.5720 -32.6600 H 0 0 0 0 0 0 0 0 0 0 0 0 0 0 0
50.1100 9.5800 -32.5140 H 0 0 0 0 0 0 0 0 0 0 0 0 0 0 0

```

|         |         |          |   |   |   |   |   |   |   |   |   |   |   |   |   |
|---------|---------|----------|---|---|---|---|---|---|---|---|---|---|---|---|---|
| 44.3550 | 9.1340  | -30.6910 | N | 0 | 0 | 3 | 0 | 0 | 0 | 0 | 0 | 0 | 0 | 0 | 0 |
| 44.3480 | 8.7050  | -31.6170 | H | 0 | 0 | 0 | 0 | 0 | 0 | 0 | 0 | 0 | 0 | 0 | 0 |
| 50.4070 | 9.3310  | -28.4300 | C | 0 | 0 | 0 | 0 | 0 | 0 | 0 | 0 | 0 | 0 | 0 | 0 |
| 49.5420 | 9.8200  | -27.9720 | H | 0 | 0 | 0 | 0 | 0 | 0 | 0 | 0 | 0 | 0 | 0 | 0 |
| 50.3780 | 8.2630  | -28.1910 | H | 0 | 0 | 0 | 0 | 0 | 0 | 0 | 0 | 0 | 0 | 0 | 0 |
| 51.5820 | 9.8890  | -27.8490 | O | 0 | 0 | 0 | 0 | 0 | 0 | 0 | 0 | 0 | 0 | 0 | 0 |
| 51.5490 | 9.6970  | -26.8950 | H | 0 | 0 | 0 | 0 | 0 | 0 | 0 | 0 | 0 | 0 | 0 | 0 |
| 50.4590 | 7.4470  | -32.2900 | C | 0 | 0 | 0 | 0 | 0 | 0 | 0 | 0 | 0 | 0 | 0 | 0 |
| 51.4480 | 7.5320  | -31.8310 | H | 0 | 0 | 0 | 0 | 0 | 0 | 0 | 0 | 0 | 0 | 0 | 0 |
| 49.9530 | 6.5670  | -31.8810 | H | 0 | 0 | 0 | 0 | 0 | 0 | 0 | 0 | 0 | 0 | 0 | 0 |
| 50.6420 | 7.2470  | -33.6890 | O | 0 | 0 | 0 | 0 | 0 | 0 | 0 | 0 | 0 | 0 | 0 | 0 |
| 51.1740 | 6.4390  | -33.7920 | H | 0 | 0 | 0 | 0 | 0 | 0 | 0 | 0 | 0 | 0 | 0 | 0 |
| 37.1360 | 9.2660  | -17.7270 | C | 0 | 0 | 0 | 0 | 0 | 0 | 0 | 0 | 0 | 0 | 0 | 0 |
| 37.5820 | 10.2130 | -17.4000 | H | 0 | 0 | 0 | 0 | 0 | 0 | 0 | 0 | 0 | 0 | 0 | 0 |
| 37.8110 | 8.8020  | -18.4550 | H | 0 | 0 | 0 | 0 | 0 | 0 | 0 | 0 | 0 | 0 | 0 | 0 |
| 36.9640 | 8.3850  | -16.6100 | O | 0 | 0 | 0 | 0 | 0 | 0 | 0 | 0 | 0 | 0 | 0 | 0 |
| 38.1030 | 8.1170  | -15.9110 | C | 0 | 0 | 0 | 0 | 0 | 0 | 0 | 0 | 0 | 0 | 0 | 0 |
| 37.8060 | 7.1440  | -14.8010 | C | 0 | 0 | 0 | 0 | 0 | 0 | 0 | 0 | 0 | 0 | 0 | 0 |
| 36.7400 | 7.1540  | -14.5540 | H | 0 | 0 | 0 | 0 | 0 | 0 | 0 | 0 | 0 | 0 | 0 | 0 |
| 38.0170 | 6.1430  | -15.1990 | H | 0 | 0 | 0 | 0 | 0 | 0 | 0 | 0 | 0 | 0 | 0 | 0 |
| 38.6510 | 7.3740  | -13.5490 | C | 0 | 0 | 0 | 0 | 0 | 0 | 0 | 0 | 0 | 0 | 0 | 0 |
| 39.7140 | 7.2840  | -13.8070 | H | 0 | 0 | 0 | 0 | 0 | 0 | 0 | 0 | 0 | 0 | 0 | 0 |
| 38.4690 | 6.5210  | -12.8810 | H | 0 | 0 | 0 | 0 | 0 | 0 | 0 | 0 | 0 | 0 | 0 | 0 |
| 39.2140 | 8.5540  | -16.1790 | O | 0 | 0 | 0 | 0 | 0 | 0 | 0 | 0 | 0 | 0 | 0 | 0 |
| 38.3890 | 9.7090  | -29.7820 | C | 0 | 0 | 0 | 0 | 0 | 0 | 0 | 0 | 0 | 0 | 0 | 0 |
| 38.1730 | 10.5130 | -30.4970 | H | 0 | 0 | 0 | 0 | 0 | 0 | 0 | 0 | 0 | 0 | 0 | 0 |
| 37.6020 | 8.9600  | -29.9270 | H | 0 | 0 | 0 | 0 | 0 | 0 | 0 | 0 | 0 | 0 | 0 | 0 |
| 43.1650 | 9.9690  | -30.5230 | C | 0 | 0 | 0 | 0 | 0 | 0 | 0 | 0 | 0 | 0 | 0 | 0 |
| 43.1780 | 10.4500 | -29.5370 | H | 0 | 0 | 0 | 0 | 0 | 0 | 0 | 0 | 0 | 0 | 0 | 0 |
| 43.1460 | 10.7630 | -31.2800 | H | 0 | 0 | 0 | 0 | 0 | 0 | 0 | 0 | 0 | 0 | 0 | 0 |
| 41.9160 | 9.1030  | -30.6470 | C | 0 | 0 | 0 | 0 | 0 | 0 | 0 | 0 | 0 | 0 | 0 | 0 |
| 41.8380 | 8.6680  | -31.6500 | H | 0 | 0 | 0 | 0 | 0 | 0 | 0 | 0 | 0 | 0 | 0 | 0 |
| 41.9610 | 8.2900  | -29.9110 | H | 0 | 0 | 0 | 0 | 0 | 0 | 0 | 0 | 0 | 0 | 0 | 0 |
| 40.6740 | 9.9130  | -30.3850 | C | 0 | 0 | 0 | 0 | 0 | 0 | 0 | 0 | 0 | 0 | 0 | 0 |
| 39.6430 | 9.0760  | -30.0770 | O | 0 | 0 | 0 | 0 | 0 | 0 | 0 | 0 | 0 | 0 | 0 | 0 |
| 40.5960 | 11.1320 | -30.4510 | O | 0 | 0 | 0 | 0 | 0 | 0 | 0 | 0 | 0 | 0 | 0 | 0 |
| 38.3600 | 10.2160 | -28.3440 | C | 0 | 0 | 0 | 0 | 0 | 0 | 0 | 0 | 0 | 0 | 0 | 0 |
| 38.5750 | 9.3850  | -27.6640 | H | 0 | 0 | 0 | 0 | 0 | 0 | 0 | 0 | 0 | 0 | 0 | 0 |
| 39.1310 | 10.9790 | -28.1940 | H | 0 | 0 | 0 | 0 | 0 | 0 | 0 | 0 | 0 | 0 | 0 | 0 |
| 37.0710 | 10.7600 | -28.0760 | O | 0 | 0 | 0 | 0 | 0 | 0 | 0 | 0 | 0 | 0 | 0 | 0 |
| 36.9750 | 11.3930 | -26.7990 | C | 0 | 0 | 0 | 0 | 0 | 0 | 0 | 0 | 0 | 0 | 0 | 0 |
| 37.8200 | 12.0760 | -26.6490 | H | 0 | 0 | 0 | 0 | 0 | 0 | 0 | 0 | 0 | 0 | 0 | 0 |
| 36.0660 | 12.0030 | -26.8230 | H | 0 | 0 | 0 | 0 | 0 | 0 | 0 | 0 | 0 | 0 | 0 | 0 |
| 36.8700 | 10.3740 | -25.6630 | C | 0 | 0 | 0 | 0 | 0 | 0 | 0 | 0 | 0 | 0 | 0 | 0 |
| 36.0710 | 9.6590  | -25.8910 | H | 0 | 0 | 0 | 0 | 0 | 0 | 0 | 0 | 0 | 0 | 0 | 0 |
| 37.7930 | 9.7880  | -25.6010 | H | 0 | 0 | 0 | 0 | 0 | 0 | 0 | 0 | 0 | 0 | 0 | 0 |
| 36.6050 | 11.0530 | -24.3180 | C | 0 | 0 | 0 | 0 | 0 | 0 | 0 | 0 | 0 | 0 | 0 | 0 |
| 37.4050 | 11.7730 | -24.1060 | H | 0 | 0 | 0 | 0 | 0 | 0 | 0 | 0 | 0 | 0 | 0 | 0 |
| 35.6670 | 11.6180 | -24.3700 | H | 0 | 0 | 0 | 0 | 0 | 0 | 0 | 0 | 0 | 0 | 0 | 0 |
| 36.5250 | 10.0300 | -23.1810 | C | 0 | 0 | 0 | 0 | 0 | 0 | 0 | 0 | 0 | 0 | 0 | 0 |
| 35.7350 | 9.3010  | -23.3990 | H | 0 | 0 | 0 | 0 | 0 | 0 | 0 | 0 | 0 | 0 | 0 | 0 |
| 37.4690 | 9.4750  | -23.1200 | H | 0 | 0 | 0 | 0 | 0 | 0 | 0 | 0 | 0 | 0 | 0 | 0 |
| 36.2400 | 10.7040 | -21.8380 | C | 0 | 0 | 0 | 0 | 0 | 0 | 0 | 0 | 0 | 0 | 0 | 0 |
| 37.0150 | 11.4470 | -21.6140 | H | 0 | 0 | 0 | 0 | 0 | 0 | 0 | 0 | 0 | 0 | 0 | 0 |
| 35.2960 | 11.2600 | -21.8870 | H | 0 | 0 | 0 | 0 | 0 | 0 | 0 | 0 | 0 | 0 | 0 | 0 |
| 36.1700 | 9.6900  | -20.6990 | C | 0 | 0 | 0 | 0 | 0 | 0 | 0 | 0 | 0 | 0 | 0 | 0 |
| 35.3810 | 8.9550  | -20.8980 | H | 0 | 0 | 0 | 0 | 0 | 0 | 0 | 0 | 0 | 0 | 0 | 0 |
| 37.1280 | 9.1680  | -20.6030 | H | 0 | 0 | 0 | 0 | 0 | 0 | 0 | 0 | 0 | 0 | 0 | 0 |
| 35.8700 | 10.3910 | -19.4910 | O | 0 | 0 | 0 | 0 | 0 | 0 | 0 | 0 | 0 | 0 | 0 | 0 |
| 35.7720 | 9.5330  | -18.3550 | C | 0 | 0 | 0 | 0 | 0 | 0 | 0 | 0 | 0 | 0 | 0 | 0 |
| 35.2550 | 8.5990  | -18.6060 | H | 0 | 0 | 0 | 0 | 0 | 0 | 0 | 0 | 0 | 0 | 0 | 0 |
| 35.1410 | 10.0400 | -17.6180 | H | 0 | 0 | 0 | 0 | 0 | 0 | 0 | 0 | 0 | 0 | 0 | 0 |
| 32.6790 | 10.9480 | -12.6090 | C | 0 | 0 | 0 | 0 | 0 | 0 | 0 | 0 | 0 | 0 | 0 | 0 |
| 31.8550 | 11.2850 | -13.2480 | H | 0 | 0 | 0 | 0 | 0 | 0 | 0 | 0 | 0 | 0 | 0 | 0 |
| 32.2400 | 10.1760 | -11.9620 | H | 0 | 0 | 0 | 0 | 0 | 0 | 0 | 0 | 0 | 0 | 0 | 0 |
| 33.7890 | 10.4060 | -13.4160 | N | 0 | 0 | 0 | 0 | 0 | 0 | 0 | 0 | 0 | 0 | 0 | 0 |
| 34.7020 | 9.6060  | -12.5720 | C | 0 | 0 | 0 | 0 | 0 | 0 | 0 | 0 | 0 | 0 | 0 | 0 |
| 34.7750 | 10.0270 | -11.5630 | H | 0 | 0 | 0 | 0 | 0 | 0 | 0 | 0 | 0 | 0 | 0 | 0 |
| 34.3240 | 8.5830  | -12.4470 | H | 0 | 0 | 0 | 0 | 0 | 0 | 0 | 0 | 0 | 0 | 0 | 0 |
| 36.1210 | 9.6010  | -13.1550 | C | 0 | 0 | 0 | 0 | 0 | 0 | 0 | 0 | 0 | 0 | 0 | 0 |
| 36.1060 | 9.1980  | -14.1680 | H | 0 | 0 | 0 | 0 | 0 | 0 | 0 | 0 | 0 | 0 | 0 | 0 |
| 36.4680 | 10.6350 | -13.2390 | H | 0 | 0 | 0 | 0 | 0 | 0 | 0 | 0 | 0 | 0 | 0 | 0 |
| 37.0730 | 8.7880  | -12.2630 | C | 0 | 0 | 0 | 0 | 0 | 0 | 0 | 0 | 0 | 0 | 0 | 0 |
| 37.1320 | 9.2790  | -11.2840 | H | 0 | 0 | 0 | 0 | 0 | 0 | 0 | 0 | 0 | 0 | 0 | 0 |
| 36.6210 | 7.8100  | -12.0470 | H | 0 | 0 | 0 | 0 | 0 | 0 | 0 | 0 | 0 | 0 | 0 | 0 |
| 33.2790 | 9.5900  | -14.5390 | C | 0 | 0 | 0 | 0 | 0 | 0 | 0 | 0 | 0 | 0 | 0 | 0 |
| 34.0830 | 8.9810  | -14.9700 | H | 0 | 0 | 0 | 0 | 0 | 0 | 0 | 0 | 0 | 0 | 0 | 0 |
| 32.5270 | 8.8670  | -14.1950 | H | 0 | 0 | 0 | 0 | 0 | 0 | 0 | 0 | 0 | 0 | 0 | 0 |
| 38.4400 | 8.5880  | -12.7500 | N | 0 | 0 | 3 | 0 | 0 | 0 | 0 | 0 | 0 | 0 | 0 | 0 |
| 33.1050 | 12.1630 | -11.7780 | C | 0 | 0 | 0 | 0 | 0 | 0 | 0 | 0 | 0 | 0 | 0 | 0 |
| 33.8800 | 11.9120 | -11.0500 | H | 0 | 0 | 0 | 0 | 0 | 0 | 0 | 0 | 0 | 0 | 0 | 0 |







|         |         |         |   |   |   |   |   |   |   |   |   |   |   |   |   |   |
|---------|---------|---------|---|---|---|---|---|---|---|---|---|---|---|---|---|---|
| 54.8920 | 9.2780  | 21.7990 | C | 0 | 0 | 0 | 0 | 0 | 0 | 0 | 0 | 0 | 0 | 0 | 0 | 0 |
| 55.1090 | 8.6430  | 22.6650 | H | 0 | 0 | 0 | 0 | 0 | 0 | 0 | 0 | 0 | 0 | 0 | 0 | 0 |
| 55.6040 | 9.0110  | 21.0100 | H | 0 | 0 | 0 | 0 | 0 | 0 | 0 | 0 | 0 | 0 | 0 | 0 | 0 |
| 53.5740 | 8.9970  | 21.2900 | O | 0 | 0 | 0 | 0 | 0 | 0 | 0 | 0 | 0 | 0 | 0 | 0 | 0 |
| 52.6430 | 8.6480  | 22.2240 | C | 0 | 0 | 0 | 0 | 0 | 0 | 0 | 0 | 0 | 0 | 0 | 0 | 0 |
| 51.3050 | 8.4530  | 21.5610 | C | 0 | 0 | 0 | 0 | 0 | 0 | 0 | 0 | 0 | 0 | 0 | 0 | 0 |
| 51.2940 | 8.9570  | 20.5890 | H | 0 | 0 | 0 | 0 | 0 | 0 | 0 | 0 | 0 | 0 | 0 | 0 | 0 |
| 51.1850 | 7.3810  | 21.3680 | H | 0 | 0 | 0 | 0 | 0 | 0 | 0 | 0 | 0 | 0 | 0 | 0 | 0 |
| 50.1620 | 8.9570  | 22.4440 | C | 0 | 0 | 0 | 0 | 0 | 0 | 0 | 0 | 0 | 0 | 0 | 0 | 0 |
| 50.1680 | 8.3460  | 23.3570 | H | 0 | 0 | 0 | 0 | 0 | 0 | 0 | 0 | 0 | 0 | 0 | 0 | 0 |
| 49.2070 | 8.7510  | 21.9460 | H | 0 | 0 | 0 | 0 | 0 | 0 | 0 | 0 | 0 | 0 | 0 | 0 | 0 |
| 52.8600 | 8.4950  | 23.4180 | O | 0 | 0 | 0 | 0 | 0 | 0 | 0 | 0 | 0 | 0 | 0 | 0 | 0 |
| 53.0480 | 14.6540 | 11.1930 | C | 0 | 0 | 0 | 0 | 0 | 0 | 0 | 0 | 0 | 0 | 0 | 0 | 0 |
| 53.6430 | 15.4490 | 10.7280 | H | 0 | 0 | 0 | 0 | 0 | 0 | 0 | 0 | 0 | 0 | 0 | 0 | 0 |
| 52.0870 | 15.1110 | 11.4530 | H | 0 | 0 | 0 | 0 | 0 | 0 | 0 | 0 | 0 | 0 | 0 | 0 | 0 |
| 54.5580 | 11.2360 | 8.1260  | C | 0 | 0 | 0 | 0 | 0 | 0 | 0 | 0 | 0 | 0 | 0 | 0 | 0 |
| 55.1780 | 11.0480 | 9.0090  | H | 0 | 0 | 0 | 0 | 0 | 0 | 0 | 0 | 0 | 0 | 0 | 0 | 0 |
| 55.1940 | 11.7940 | 7.4260  | H | 0 | 0 | 0 | 0 | 0 | 0 | 0 | 0 | 0 | 0 | 0 | 0 | 0 |
| 53.3670 | 12.0830 | 8.5770  | C | 0 | 0 | 0 | 0 | 0 | 0 | 0 | 0 | 0 | 0 | 0 | 0 | 0 |
| 52.8240 | 12.5110 | 7.7290  | H | 0 | 0 | 0 | 0 | 0 | 0 | 0 | 0 | 0 | 0 | 0 | 0 | 0 |
| 52.6760 | 11.4540 | 9.1540  | H | 0 | 0 | 0 | 0 | 0 | 0 | 0 | 0 | 0 | 0 | 0 | 0 | 0 |
| 53.8190 | 13.2150 | 9.4630  | C | 0 | 0 | 0 | 0 | 0 | 0 | 0 | 0 | 0 | 0 | 0 | 0 | 0 |
| 52.7820 | 13.5950 | 10.2620 | O | 0 | 0 | 0 | 0 | 0 | 0 | 0 | 0 | 0 | 0 | 0 | 0 | 0 |
| 54.9330 | 13.7180 | 9.4580  | O | 0 | 0 | 0 | 0 | 0 | 0 | 0 | 0 | 0 | 0 | 0 | 0 | 0 |
| 53.7200 | 14.1180 | 12.4520 | C | 0 | 0 | 0 | 0 | 0 | 0 | 0 | 0 | 0 | 0 | 0 | 0 | 0 |
| 53.0910 | 13.3440 | 12.9050 | H | 0 | 0 | 0 | 0 | 0 | 0 | 0 | 0 | 0 | 0 | 0 | 0 | 0 |
| 54.6820 | 13.6600 | 12.1970 | H | 0 | 0 | 0 | 0 | 0 | 0 | 0 | 0 | 0 | 0 | 0 | 0 | 0 |
| 53.9070 | 15.1970 | 13.3640 | O | 0 | 0 | 0 | 0 | 0 | 0 | 0 | 0 | 0 | 0 | 0 | 0 | 0 |
| 54.7500 | 14.8660 | 14.4680 | C | 0 | 0 | 0 | 0 | 0 | 0 | 0 | 0 | 0 | 0 | 0 | 0 | 0 |
| 55.6560 | 14.3580 | 14.1170 | H | 0 | 0 | 0 | 0 | 0 | 0 | 0 | 0 | 0 | 0 | 0 | 0 | 0 |
| 55.0670 | 15.8160 | 14.9120 | H | 0 | 0 | 0 | 0 | 0 | 0 | 0 | 0 | 0 | 0 | 0 | 0 | 0 |
| 54.0180 | 14.0390 | 15.5260 | C | 0 | 0 | 0 | 0 | 0 | 0 | 0 | 0 | 0 | 0 | 0 | 0 | 0 |
| 53.1040 | 14.5640 | 15.8290 | H | 0 | 0 | 0 | 0 | 0 | 0 | 0 | 0 | 0 | 0 | 0 | 0 | 0 |
| 53.6950 | 13.0840 | 15.0980 | H | 0 | 0 | 0 | 0 | 0 | 0 | 0 | 0 | 0 | 0 | 0 | 0 | 0 |
| 54.9100 | 13.7820 | 16.7420 | C | 0 | 0 | 0 | 0 | 0 | 0 | 0 | 0 | 0 | 0 | 0 | 0 | 0 |
| 55.8220 | 13.2670 | 16.4190 | H | 0 | 0 | 0 | 0 | 0 | 0 | 0 | 0 | 0 | 0 | 0 | 0 | 0 |
| 55.2190 | 14.7400 | 17.1790 | H | 0 | 0 | 0 | 0 | 0 | 0 | 0 | 0 | 0 | 0 | 0 | 0 | 0 |
| 54.2020 | 12.9410 | 17.8100 | C | 0 | 0 | 0 | 0 | 0 | 0 | 0 | 0 | 0 | 0 | 0 | 0 | 0 |
| 53.3070 | 13.4670 | 18.1620 | H | 0 | 0 | 0 | 0 | 0 | 0 | 0 | 0 | 0 | 0 | 0 | 0 | 0 |
| 53.8720 | 11.9920 | 17.3710 | H | 0 | 0 | 0 | 0 | 0 | 0 | 0 | 0 | 0 | 0 | 0 | 0 | 0 |
| 55.1340 | 12.6640 | 18.9890 | C | 0 | 0 | 0 | 0 | 0 | 0 | 0 | 0 | 0 | 0 | 0 | 0 | 0 |
| 56.0500 | 12.1740 | 18.6340 | H | 0 | 0 | 0 | 0 | 0 | 0 | 0 | 0 | 0 | 0 | 0 | 0 | 0 |
| 55.4600 | 13.6080 | 19.4440 | H | 0 | 0 | 0 | 0 | 0 | 0 | 0 | 0 | 0 | 0 | 0 | 0 | 0 |
| 54.4870 | 11.7880 | 20.0600 | C | 0 | 0 | 0 | 0 | 0 | 0 | 0 | 0 | 0 | 0 | 0 | 0 | 0 |
| 53.6250 | 12.2980 | 20.5030 | H | 0 | 0 | 0 | 0 | 0 | 0 | 0 | 0 | 0 | 0 | 0 | 0 | 0 |
| 54.1620 | 10.8430 | 19.6150 | H | 0 | 0 | 0 | 0 | 0 | 0 | 0 | 0 | 0 | 0 | 0 | 0 | 0 |
| 55.4730 | 11.5460 | 21.0620 | O | 0 | 0 | 0 | 0 | 0 | 0 | 0 | 0 | 0 | 0 | 0 | 0 | 0 |
| 55.0140 | 10.7570 | 22.1650 | C | 0 | 0 | 0 | 0 | 0 | 0 | 0 | 0 | 0 | 0 | 0 | 0 | 0 |
| 54.0790 | 11.1730 | 22.5570 | H | 0 | 0 | 0 | 0 | 0 | 0 | 0 | 0 | 0 | 0 | 0 | 0 | 0 |
| 55.7810 | 10.8610 | 22.9390 | H | 0 | 0 | 0 | 0 | 0 | 0 | 0 | 0 | 0 | 0 | 0 | 0 | 0 |
| 49.0620 | 12.8350 | 17.2240 | C | 0 | 0 | 0 | 0 | 0 | 0 | 0 | 0 | 0 | 0 | 0 | 0 | 0 |
| 48.2940 | 12.8850 | 16.4420 | H | 0 | 0 | 0 | 0 | 0 | 0 | 0 | 0 | 0 | 0 | 0 | 0 | 0 |
| 49.2460 | 13.8800 | 17.5080 | H | 0 | 0 | 0 | 0 | 0 | 0 | 0 | 0 | 0 | 0 | 0 | 0 | 0 |
| 48.5900 | 12.0400 | 18.3750 | N | 0 | 0 | 0 | 0 | 0 | 0 | 0 | 0 | 0 | 0 | 0 | 0 | 0 |
| 49.4250 | 12.2990 | 19.5640 | C | 0 | 0 | 0 | 0 | 0 | 0 | 0 | 0 | 0 | 0 | 0 | 0 | 0 |
| 50.4830 | 12.3010 | 19.2830 | H | 0 | 0 | 0 | 0 | 0 | 0 | 0 | 0 | 0 | 0 | 0 | 0 | 0 |
| 49.2120 | 13.2890 | 19.9860 | H | 0 | 0 | 0 | 0 | 0 | 0 | 0 | 0 | 0 | 0 | 0 | 0 | 0 |
| 49.2470 | 11.2110 | 20.6350 | C | 0 | 0 | 0 | 0 | 0 | 0 | 0 | 0 | 0 | 0 | 0 | 0 | 0 |
| 48.2610 | 11.2990 | 21.1020 | H | 0 | 0 | 0 | 0 | 0 | 0 | 0 | 0 | 0 | 0 | 0 | 0 | 0 |
| 49.2930 | 10.2280 | 20.1530 | H | 0 | 0 | 0 | 0 | 0 | 0 | 0 | 0 | 0 | 0 | 0 | 0 | 0 |
| 50.3400 | 11.3220 | 21.7080 | C | 0 | 0 | 0 | 0 | 0 | 0 | 0 | 0 | 0 | 0 | 0 | 0 | 0 |
| 51.3180 | 11.1890 | 21.2290 | H | 0 | 0 | 0 | 0 | 0 | 0 | 0 | 0 | 0 | 0 | 0 | 0 | 0 |
| 50.3710 | 12.3510 | 22.0850 | H | 0 | 0 | 0 | 0 | 0 | 0 | 0 | 0 | 0 | 0 | 0 | 0 | 0 |
| 47.1650 | 12.3140 | 18.6460 | C | 0 | 0 | 0 | 0 | 0 | 0 | 0 | 0 | 0 | 0 | 0 | 0 | 0 |
| 46.8850 | 12.0090 | 19.6610 | H | 0 | 0 | 0 | 0 | 0 | 0 | 0 | 0 | 0 | 0 | 0 | 0 | 0 |
| 46.9470 | 13.3900 | 18.6060 | H | 0 | 0 | 0 | 0 | 0 | 0 | 0 | 0 | 0 | 0 | 0 | 0 | 0 |
| 50.2480 | 10.3780 | 22.8330 | N | 0 | 0 | 3 | 0 | 0 | 0 | 0 | 0 | 0 | 0 | 0 | 0 | 0 |
| 50.3110 | 12.2380 | 16.5630 | C | 0 | 0 | 0 | 0 | 0 | 0 | 0 | 0 | 0 | 0 | 0 | 0 | 0 |
| 51.1650 | 12.2240 | 17.2440 | H | 0 | 0 | 0 | 0 | 0 | 0 | 0 | 0 | 0 | 0 | 0 | 0 | 0 |
| 50.1300 | 11.2120 | 16.2250 | H | 0 | 0 | 0 | 0 | 0 | 0 | 0 | 0 | 0 | 0 | 0 | 0 | 0 |
| 50.6900 | 13.0230 | 15.4370 | O | 0 | 0 | 0 | 0 | 0 | 0 | 0 | 0 | 0 | 0 | 0 | 0 | 0 |
| 50.0350 | 12.8750 | 14.7320 | H | 0 | 0 | 0 | 0 | 0 | 0 | 0 | 0 | 0 | 0 | 0 | 0 | 0 |
| 46.2410 | 11.5430 | 17.6970 | C | 0 | 0 | 0 | 0 | 0 | 0 | 0 | 0 | 0 | 0 | 0 | 0 | 0 |
| 46.3390 | 11.8850 | 16.6640 | H | 0 | 0 | 0 | 0 | 0 | 0 | 0 | 0 | 0 | 0 | 0 | 0 | 0 |
| 46.4550 | 10.4690 | 17.7370 | H | 0 | 0 | 0 | 0 | 0 | 0 | 0 | 0 | 0 | 0 | 0 | 0 | 0 |
| 44.8900 | 11.7390 | 18.1010 | O | 0 | 0 | 0 | 0 | 0 | 0 | 0 | 0 | 0 | 0 | 0 | 0 | 0 |
| 44.3350 | 11.2410 | 17.4750 | H | 0 | 0 | 0 | 0 | 0 | 0 | 0 | 0 | 0 | 0 | 0 | 0 | 0 |
| 53.7360 | 11.8080 | 38.3630 | C | 0 | 0 | 0 | 0 | 0 | 0 | 0 | 0 | 0 | 0 | 0 | 0 | 0 |
| 54.3390 | 12.7240 | 38.3160 | H | 0 | 0 | 0 | 0 | 0 | 0 | 0 | 0 | 0 | 0 | 0 | 0 | 0 |
| 53.8250 | 11.3430 | 37.3760 | H | 0 | 0 | 0 | 0 | 0 | 0 | 0 | 0 | 0 | 0 | 0 | 0 | 0 |
| 54.2730 | 10.8740 | 39.3130 | O | 0 | 0 | 0 | 0 | 0 | 0 | 0 | 0 | 0 | 0 | 0 | 0 | 0 |

|         |         |         |   |   |   |   |   |   |   |   |   |   |   |   |   |
|---------|---------|---------|---|---|---|---|---|---|---|---|---|---|---|---|---|
| 54.7490 | 11.4080 | 40.4750 | C | 0 | 0 | 0 | 0 | 0 | 0 | 0 | 0 | 0 | 0 | 0 | 0 |
| 55.2920 | 10.3000 | 41.3450 | C | 0 | 0 | 0 | 0 | 0 | 0 | 0 | 0 | 0 | 0 | 0 | 0 |
| 54.4840 | 9.5880  | 41.5440 | H | 0 | 0 | 0 | 0 | 0 | 0 | 0 | 0 | 0 | 0 | 0 | 0 |
| 56.0930 | 9.7910  | 40.7980 | H | 0 | 0 | 0 | 0 | 0 | 0 | 0 | 0 | 0 | 0 | 0 | 0 |
| 55.8370 | 10.8240 | 42.6620 | C | 0 | 0 | 0 | 0 | 0 | 0 | 0 | 0 | 0 | 0 | 0 | 0 |
| 56.6510 | 11.5370 | 42.4960 | H | 0 | 0 | 0 | 0 | 0 | 0 | 0 | 0 | 0 | 0 | 0 | 0 |
| 56.2240 | 10.0000 | 43.2700 | H | 0 | 0 | 0 | 0 | 0 | 0 | 0 | 0 | 0 | 0 | 0 | 0 |
| 55.0560 | 11.3350 | 43.2360 | H | 0 | 0 | 0 | 0 | 0 | 0 | 0 | 0 | 0 | 0 | 0 | 0 |
| 54.7320 | 12.5950 | 40.7670 | O | 0 | 0 | 0 | 0 | 0 | 0 | 0 | 0 | 0 | 0 | 0 | 0 |
| 47.9840 | 13.0070 | 27.8200 | C | 0 | 0 | 0 | 0 | 0 | 0 | 0 | 0 | 0 | 0 | 0 | 0 |
| 47.2430 | 13.7300 | 27.4590 | H | 0 | 0 | 0 | 0 | 0 | 0 | 0 | 0 | 0 | 0 | 0 | 0 |
| 47.4590 | 12.0860 | 28.1000 | H | 0 | 0 | 0 | 0 | 0 | 0 | 0 | 0 | 0 | 0 | 0 | 0 |
| 49.1760 | 10.7120 | 23.7890 | C | 0 | 0 | 0 | 0 | 0 | 0 | 0 | 0 | 0 | 0 | 0 | 0 |
| 48.2140 | 10.8410 | 23.2790 | H | 0 | 0 | 0 | 0 | 0 | 0 | 0 | 0 | 0 | 0 | 0 | 0 |
| 49.0320 | 9.8730  | 24.4840 | H | 0 | 0 | 0 | 0 | 0 | 0 | 0 | 0 | 0 | 0 | 0 | 0 |
| 49.5110 | 11.9360 | 24.6460 | C | 0 | 0 | 0 | 0 | 0 | 0 | 0 | 0 | 0 | 0 | 0 | 0 |
| 50.4630 | 11.7660 | 25.1650 | H | 0 | 0 | 0 | 0 | 0 | 0 | 0 | 0 | 0 | 0 | 0 | 0 |
| 49.5930 | 12.8510 | 24.0530 | H | 0 | 0 | 0 | 0 | 0 | 0 | 0 | 0 | 0 | 0 | 0 | 0 |
| 48.4260 | 12.1580 | 25.6690 | C | 0 | 0 | 0 | 0 | 0 | 0 | 0 | 0 | 0 | 0 | 0 | 0 |
| 48.9430 | 12.7370 | 26.7890 | O | 0 | 0 | 0 | 0 | 0 | 0 | 0 | 0 | 0 | 0 | 0 | 0 |
| 47.2470 | 11.8840 | 25.4920 | O | 0 | 0 | 0 | 0 | 0 | 0 | 0 | 0 | 0 | 0 | 0 | 0 |
| 48.7130 | 13.5730 | 29.0320 | C | 0 | 0 | 0 | 0 | 0 | 0 | 0 | 0 | 0 | 0 | 0 | 0 |
| 49.4590 | 12.8500 | 29.3800 | H | 0 | 0 | 0 | 0 | 0 | 0 | 0 | 0 | 0 | 0 | 0 | 0 |
| 49.2430 | 14.4900 | 28.7500 | H | 0 | 0 | 0 | 0 | 0 | 0 | 0 | 0 | 0 | 0 | 0 | 0 |
| 47.7620 | 13.8500 | 30.0560 | O | 0 | 0 | 0 | 0 | 0 | 0 | 0 | 0 | 0 | 0 | 0 | 0 |
| 48.3450 | 14.4230 | 31.2280 | C | 0 | 0 | 0 | 0 | 0 | 0 | 0 | 0 | 0 | 0 | 0 | 0 |
| 49.0760 | 15.1930 | 30.9560 | H | 0 | 0 | 0 | 0 | 0 | 0 | 0 | 0 | 0 | 0 | 0 | 0 |
| 47.5330 | 14.9220 | 31.7680 | H | 0 | 0 | 0 | 0 | 0 | 0 | 0 | 0 | 0 | 0 | 0 | 0 |
| 48.9630 | 13.3510 | 32.1260 | C | 0 | 0 | 0 | 0 | 0 | 0 | 0 | 0 | 0 | 0 | 0 | 0 |
| 48.2130 | 12.5780 | 32.3340 | H | 0 | 0 | 0 | 0 | 0 | 0 | 0 | 0 | 0 | 0 | 0 | 0 |
| 49.7790 | 12.8450 | 31.6000 | H | 0 | 0 | 0 | 0 | 0 | 0 | 0 | 0 | 0 | 0 | 0 | 0 |
| 49.4880 | 13.9450 | 33.4350 | C | 0 | 0 | 0 | 0 | 0 | 0 | 0 | 0 | 0 | 0 | 0 | 0 |
| 50.2390 | 14.7130 | 33.2120 | H | 0 | 0 | 0 | 0 | 0 | 0 | 0 | 0 | 0 | 0 | 0 | 0 |
| 48.6680 | 14.4400 | 33.9680 | H | 0 | 0 | 0 | 0 | 0 | 0 | 0 | 0 | 0 | 0 | 0 | 0 |
| 50.1060 | 12.8690 | 34.3310 | C | 0 | 0 | 0 | 0 | 0 | 0 | 0 | 0 | 0 | 0 | 0 | 0 |
| 49.3540 | 12.1030 | 34.5560 | H | 0 | 0 | 0 | 0 | 0 | 0 | 0 | 0 | 0 | 0 | 0 | 0 |
| 50.9250 | 12.3720 | 33.7970 | H | 0 | 0 | 0 | 0 | 0 | 0 | 0 | 0 | 0 | 0 | 0 | 0 |
| 50.6360 | 13.4630 | 35.6370 | C | 0 | 0 | 0 | 0 | 0 | 0 | 0 | 0 | 0 | 0 | 0 | 0 |
| 51.3880 | 14.2340 | 35.4250 | H | 0 | 0 | 0 | 0 | 0 | 0 | 0 | 0 | 0 | 0 | 0 | 0 |
| 49.8280 | 13.9740 | 36.1760 | H | 0 | 0 | 0 | 0 | 0 | 0 | 0 | 0 | 0 | 0 | 0 | 0 |
| 51.2490 | 12.3970 | 36.5400 | C | 0 | 0 | 0 | 0 | 0 | 0 | 0 | 0 | 0 | 0 | 0 | 0 |
| 50.4950 | 11.6430 | 36.7960 | H | 0 | 0 | 0 | 0 | 0 | 0 | 0 | 0 | 0 | 0 | 0 | 0 |
| 52.0830 | 11.9070 | 36.0270 | H | 0 | 0 | 0 | 0 | 0 | 0 | 0 | 0 | 0 | 0 | 0 | 0 |
| 51.7130 | 13.0310 | 37.7320 | O | 0 | 0 | 0 | 0 | 0 | 0 | 0 | 0 | 0 | 0 | 0 | 0 |
| 52.2750 | 12.1210 | 38.6750 | C | 0 | 0 | 0 | 0 | 0 | 0 | 0 | 0 | 0 | 0 | 0 | 0 |
| 51.6780 | 11.2030 | 38.7420 | H | 0 | 0 | 0 | 0 | 0 | 0 | 0 | 0 | 0 | 0 | 0 | 0 |
| 52.2080 | 12.5960 | 39.6600 | H | 0 | 0 | 0 | 0 | 0 | 0 | 0 | 0 | 0 | 0 | 0 | 0 |
| 1       | 2       | 1       | 0 | 0 | 0 | 0 |   |   |   |   |   |   |   |   |   |
| 1       | 3       | 1       | 0 | 0 | 0 | 0 |   |   |   |   |   |   |   |   |   |
| 1       | 4       | 1       | 0 | 0 | 0 | 0 |   |   |   |   |   |   |   |   |   |
| 1       | 19      | 1       | 0 | 0 | 0 | 0 |   |   |   |   |   |   |   |   |   |
| 4       | 5       | 1       | 0 | 0 | 0 | 0 |   |   |   |   |   |   |   |   |   |
| 4       | 14      | 1       | 0 | 0 | 0 | 0 |   |   |   |   |   |   |   |   |   |
| 5       | 6       | 1       | 0 | 0 | 0 | 0 |   |   |   |   |   |   |   |   |   |
| 5       | 7       | 1       | 0 | 0 | 0 | 0 |   |   |   |   |   |   |   |   |   |
| 5       | 8       | 1       | 0 | 0 | 0 | 0 |   |   |   |   |   |   |   |   |   |
| 8       | 9       | 1       | 0 | 0 | 0 | 0 |   |   |   |   |   |   |   |   |   |
| 8       | 10      | 1       | 0 | 0 | 0 | 0 |   |   |   |   |   |   |   |   |   |
| 8       | 11      | 1       | 0 | 0 | 0 | 0 |   |   |   |   |   |   |   |   |   |
| 11      | 12      | 1       | 0 | 0 | 0 | 0 |   |   |   |   |   |   |   |   |   |
| 11      | 13      | 1       | 0 | 0 | 0 | 0 |   |   |   |   |   |   |   |   |   |
| 11      | 17      | 1       | 0 | 0 | 0 | 0 |   |   |   |   |   |   |   |   |   |
| 14      | 15      | 1       | 0 | 0 | 0 | 0 |   |   |   |   |   |   |   |   |   |
| 14      | 16      | 1       | 0 | 0 | 0 | 0 |   |   |   |   |   |   |   |   |   |
| 14      | 24      | 1       | 0 | 0 | 0 | 0 |   |   |   |   |   |   |   |   |   |
| 17      | 18      | 1       | 0 | 0 | 0 | 0 |   |   |   |   |   |   |   |   |   |
| 17      | 44      | 1       | 0 | 0 | 0 | 0 |   |   |   |   |   |   |   |   |   |
| 19      | 20      | 1       | 0 | 0 | 0 | 0 |   |   |   |   |   |   |   |   |   |
| 19      | 21      | 1       | 0 | 0 | 0 | 0 |   |   |   |   |   |   |   |   |   |
| 19      | 22      | 1       | 0 | 0 | 0 | 0 |   |   |   |   |   |   |   |   |   |
| 22      | 23      | 1       | 0 | 0 | 0 | 0 |   |   |   |   |   |   |   |   |   |
| 24      | 25      | 1       | 0 | 0 | 0 | 0 |   |   |   |   |   |   |   |   |   |
| 24      | 26      | 1       | 0 | 0 | 0 | 0 |   |   |   |   |   |   |   |   |   |
| 24      | 27      | 1       | 0 | 0 | 0 | 0 |   |   |   |   |   |   |   |   |   |
| 27      | 28      | 1       | 0 | 0 | 0 | 0 |   |   |   |   |   |   |   |   |   |
| 29      | 30      | 1       | 0 | 0 | 0 | 0 |   |   |   |   |   |   |   |   |   |
| 29      | 31      | 1       | 0 | 0 | 0 | 0 |   |   |   |   |   |   |   |   |   |
| 29      | 32      | 1       | 0 | 0 | 0 | 0 |   |   |   |   |   |   |   |   |   |
| 29      | 76      | 1       | 0 | 0 | 0 | 0 |   |   |   |   |   |   |   |   |   |
| 32      | 33      | 1       | 0 | 0 | 0 | 0 |   |   |   |   |   |   |   |   |   |
| 33      | 34      | 1       | 0 | 0 | 0 | 0 |   |   |   |   |   |   |   |   |   |

|     |     |   |   |   |   |   |
|-----|-----|---|---|---|---|---|
| 33  | 40  | 2 | 0 | 0 | 0 | 0 |
| 34  | 35  | 1 | 0 | 0 | 0 | 0 |
| 34  | 36  | 1 | 0 | 0 | 0 | 0 |
| 34  | 37  | 1 | 0 | 0 | 0 | 0 |
| 37  | 38  | 1 | 0 | 0 | 0 | 0 |
| 37  | 39  | 1 | 0 | 0 | 0 | 0 |
| 37  | 95  | 1 | 0 | 0 | 0 | 0 |
| 41  | 42  | 1 | 0 | 0 | 0 | 0 |
| 41  | 43  | 1 | 0 | 0 | 0 | 0 |
| 41  | 51  | 1 | 0 | 0 | 0 | 0 |
| 41  | 53  | 1 | 0 | 0 | 0 | 0 |
| 44  | 45  | 1 | 0 | 0 | 0 | 0 |
| 44  | 46  | 1 | 0 | 0 | 0 | 0 |
| 44  | 47  | 1 | 0 | 0 | 0 | 0 |
| 47  | 48  | 1 | 0 | 0 | 0 | 0 |
| 47  | 49  | 1 | 0 | 0 | 0 | 0 |
| 47  | 50  | 1 | 0 | 0 | 0 | 0 |
| 50  | 51  | 1 | 0 | 0 | 0 | 0 |
| 50  | 52  | 2 | 0 | 0 | 0 | 0 |
| 53  | 54  | 1 | 0 | 0 | 0 | 0 |
| 53  | 55  | 1 | 0 | 0 | 0 | 0 |
| 53  | 56  | 1 | 0 | 0 | 0 | 0 |
| 56  | 57  | 1 | 0 | 0 | 0 | 0 |
| 57  | 58  | 1 | 0 | 0 | 0 | 0 |
| 57  | 59  | 1 | 0 | 0 | 0 | 0 |
| 57  | 60  | 1 | 0 | 0 | 0 | 0 |
| 60  | 61  | 1 | 0 | 0 | 0 | 0 |
| 60  | 62  | 1 | 0 | 0 | 0 | 0 |
| 60  | 63  | 1 | 0 | 0 | 0 | 0 |
| 63  | 64  | 1 | 0 | 0 | 0 | 0 |
| 63  | 65  | 1 | 0 | 0 | 0 | 0 |
| 63  | 66  | 1 | 0 | 0 | 0 | 0 |
| 66  | 67  | 1 | 0 | 0 | 0 | 0 |
| 66  | 68  | 1 | 0 | 0 | 0 | 0 |
| 66  | 69  | 1 | 0 | 0 | 0 | 0 |
| 69  | 70  | 1 | 0 | 0 | 0 | 0 |
| 69  | 71  | 1 | 0 | 0 | 0 | 0 |
| 69  | 72  | 1 | 0 | 0 | 0 | 0 |
| 72  | 73  | 1 | 0 | 0 | 0 | 0 |
| 72  | 74  | 1 | 0 | 0 | 0 | 0 |
| 72  | 75  | 1 | 0 | 0 | 0 | 0 |
| 75  | 76  | 1 | 0 | 0 | 0 | 0 |
| 76  | 77  | 1 | 0 | 0 | 0 | 0 |
| 76  | 78  | 1 | 0 | 0 | 0 | 0 |
| 79  | 80  | 1 | 0 | 0 | 0 | 0 |
| 79  | 81  | 1 | 0 | 0 | 0 | 0 |
| 79  | 82  | 1 | 0 | 0 | 0 | 0 |
| 79  | 96  | 1 | 0 | 0 | 0 | 0 |
| 82  | 83  | 1 | 0 | 0 | 0 | 0 |
| 82  | 92  | 1 | 0 | 0 | 0 | 0 |
| 83  | 84  | 1 | 0 | 0 | 0 | 0 |
| 83  | 85  | 1 | 0 | 0 | 0 | 0 |
| 83  | 86  | 1 | 0 | 0 | 0 | 0 |
| 86  | 87  | 1 | 0 | 0 | 0 | 0 |
| 86  | 88  | 1 | 0 | 0 | 0 | 0 |
| 86  | 89  | 1 | 0 | 0 | 0 | 0 |
| 89  | 90  | 1 | 0 | 0 | 0 | 0 |
| 89  | 91  | 1 | 0 | 0 | 0 | 0 |
| 89  | 95  | 1 | 0 | 0 | 0 | 0 |
| 92  | 93  | 1 | 0 | 0 | 0 | 0 |
| 92  | 94  | 1 | 0 | 0 | 0 | 0 |
| 92  | 101 | 1 | 0 | 0 | 0 | 0 |
| 95  | 121 | 1 | 0 | 0 | 0 | 0 |
| 96  | 97  | 1 | 0 | 0 | 0 | 0 |
| 96  | 98  | 1 | 0 | 0 | 0 | 0 |
| 96  | 99  | 1 | 0 | 0 | 0 | 0 |
| 99  | 100 | 1 | 0 | 0 | 0 | 0 |
| 101 | 102 | 1 | 0 | 0 | 0 | 0 |
| 101 | 103 | 1 | 0 | 0 | 0 | 0 |
| 101 | 104 | 1 | 0 | 0 | 0 | 0 |
| 104 | 105 | 1 | 0 | 0 | 0 | 0 |
| 106 | 107 | 1 | 0 | 0 | 0 | 0 |
| 106 | 108 | 1 | 0 | 0 | 0 | 0 |
| 106 | 109 | 1 | 0 | 0 | 0 | 0 |
| 106 | 153 | 1 | 0 | 0 | 0 | 0 |
| 109 | 110 | 1 | 0 | 0 | 0 | 0 |
| 110 | 111 | 1 | 0 | 0 | 0 | 0 |
| 110 | 117 | 2 | 0 | 0 | 0 | 0 |
| 111 | 112 | 1 | 0 | 0 | 0 | 0 |
| 111 | 113 | 1 | 0 | 0 | 0 | 0 |
| 111 | 114 | 1 | 0 | 0 | 0 | 0 |

|        |   |   |   |   |   |
|--------|---|---|---|---|---|
| 114115 | 1 | 0 | 0 | 0 | 0 |
| 114116 | 1 | 0 | 0 | 0 | 0 |
| 114172 | 1 | 0 | 0 | 0 | 0 |
| 118119 | 1 | 0 | 0 | 0 | 0 |
| 118120 | 1 | 0 | 0 | 0 | 0 |
| 118128 | 1 | 0 | 0 | 0 | 0 |
| 118130 | 1 | 0 | 0 | 0 | 0 |
| 121122 | 1 | 0 | 0 | 0 | 0 |
| 121123 | 1 | 0 | 0 | 0 | 0 |
| 121124 | 1 | 0 | 0 | 0 | 0 |
| 124125 | 1 | 0 | 0 | 0 | 0 |
| 124126 | 1 | 0 | 0 | 0 | 0 |
| 124127 | 1 | 0 | 0 | 0 | 0 |
| 127128 | 1 | 0 | 0 | 0 | 0 |
| 127129 | 2 | 0 | 0 | 0 | 0 |
| 130131 | 1 | 0 | 0 | 0 | 0 |
| 130132 | 1 | 0 | 0 | 0 | 0 |
| 130133 | 1 | 0 | 0 | 0 | 0 |
| 133134 | 1 | 0 | 0 | 0 | 0 |
| 134135 | 1 | 0 | 0 | 0 | 0 |
| 134136 | 1 | 0 | 0 | 0 | 0 |
| 134137 | 1 | 0 | 0 | 0 | 0 |
| 137138 | 1 | 0 | 0 | 0 | 0 |
| 137139 | 1 | 0 | 0 | 0 | 0 |
| 137140 | 1 | 0 | 0 | 0 | 0 |
| 140141 | 1 | 0 | 0 | 0 | 0 |
| 140142 | 1 | 0 | 0 | 0 | 0 |
| 140143 | 1 | 0 | 0 | 0 | 0 |
| 143144 | 1 | 0 | 0 | 0 | 0 |
| 143145 | 1 | 0 | 0 | 0 | 0 |
| 143146 | 1 | 0 | 0 | 0 | 0 |
| 146147 | 1 | 0 | 0 | 0 | 0 |
| 146148 | 1 | 0 | 0 | 0 | 0 |
| 146149 | 1 | 0 | 0 | 0 | 0 |
| 149150 | 1 | 0 | 0 | 0 | 0 |
| 149151 | 1 | 0 | 0 | 0 | 0 |
| 149152 | 1 | 0 | 0 | 0 | 0 |
| 152153 | 1 | 0 | 0 | 0 | 0 |
| 153154 | 1 | 0 | 0 | 0 | 0 |
| 153155 | 1 | 0 | 0 | 0 | 0 |
| 156157 | 1 | 0 | 0 | 0 | 0 |
| 156158 | 1 | 0 | 0 | 0 | 0 |
| 156159 | 1 | 0 | 0 | 0 | 0 |
| 156173 | 1 | 0 | 0 | 0 | 0 |
| 159160 | 1 | 0 | 0 | 0 | 0 |
| 159169 | 1 | 0 | 0 | 0 | 0 |
| 160161 | 1 | 0 | 0 | 0 | 0 |
| 160162 | 1 | 0 | 0 | 0 | 0 |
| 160163 | 1 | 0 | 0 | 0 | 0 |
| 163164 | 1 | 0 | 0 | 0 | 0 |
| 163165 | 1 | 0 | 0 | 0 | 0 |
| 163166 | 1 | 0 | 0 | 0 | 0 |
| 166167 | 1 | 0 | 0 | 0 | 0 |
| 166168 | 1 | 0 | 0 | 0 | 0 |
| 166172 | 1 | 0 | 0 | 0 | 0 |
| 169170 | 1 | 0 | 0 | 0 | 0 |
| 169171 | 1 | 0 | 0 | 0 | 0 |
| 169178 | 1 | 0 | 0 | 0 | 0 |
| 172198 | 1 | 0 | 0 | 0 | 0 |
| 173174 | 1 | 0 | 0 | 0 | 0 |
| 173175 | 1 | 0 | 0 | 0 | 0 |
| 173176 | 1 | 0 | 0 | 0 | 0 |
| 176177 | 1 | 0 | 0 | 0 | 0 |
| 178179 | 1 | 0 | 0 | 0 | 0 |
| 178180 | 1 | 0 | 0 | 0 | 0 |
| 178181 | 1 | 0 | 0 | 0 | 0 |
| 181182 | 1 | 0 | 0 | 0 | 0 |
| 183184 | 1 | 0 | 0 | 0 | 0 |
| 183185 | 1 | 0 | 0 | 0 | 0 |
| 183186 | 1 | 0 | 0 | 0 | 0 |
| 183230 | 1 | 0 | 0 | 0 | 0 |
| 186187 | 1 | 0 | 0 | 0 | 0 |
| 187188 | 1 | 0 | 0 | 0 | 0 |
| 187194 | 2 | 0 | 0 | 0 | 0 |
| 188189 | 1 | 0 | 0 | 0 | 0 |
| 188190 | 1 | 0 | 0 | 0 | 0 |
| 188191 | 1 | 0 | 0 | 0 | 0 |
| 191192 | 1 | 0 | 0 | 0 | 0 |
| 191193 | 1 | 0 | 0 | 0 | 0 |
| 191249 | 1 | 0 | 0 | 0 | 0 |
| 195196 | 1 | 0 | 0 | 0 | 0 |

|        |   |   |   |   |   |
|--------|---|---|---|---|---|
| 195197 | 1 | 0 | 0 | 0 | 0 |
| 195205 | 1 | 0 | 0 | 0 | 0 |
| 195207 | 1 | 0 | 0 | 0 | 0 |
| 198199 | 1 | 0 | 0 | 0 | 0 |
| 198200 | 1 | 0 | 0 | 0 | 0 |
| 198201 | 1 | 0 | 0 | 0 | 0 |
| 201202 | 1 | 0 | 0 | 0 | 0 |
| 201203 | 1 | 0 | 0 | 0 | 0 |
| 201204 | 1 | 0 | 0 | 0 | 0 |
| 204205 | 1 | 0 | 0 | 0 | 0 |
| 204206 | 2 | 0 | 0 | 0 | 0 |
| 207208 | 1 | 0 | 0 | 0 | 0 |
| 207209 | 1 | 0 | 0 | 0 | 0 |
| 207210 | 1 | 0 | 0 | 0 | 0 |
| 210211 | 1 | 0 | 0 | 0 | 0 |
| 211212 | 1 | 0 | 0 | 0 | 0 |
| 211213 | 1 | 0 | 0 | 0 | 0 |
| 211214 | 1 | 0 | 0 | 0 | 0 |
| 214215 | 1 | 0 | 0 | 0 | 0 |
| 214216 | 1 | 0 | 0 | 0 | 0 |
| 214217 | 1 | 0 | 0 | 0 | 0 |
| 217218 | 1 | 0 | 0 | 0 | 0 |
| 217219 | 1 | 0 | 0 | 0 | 0 |
| 217220 | 1 | 0 | 0 | 0 | 0 |
| 220221 | 1 | 0 | 0 | 0 | 0 |
| 220222 | 1 | 0 | 0 | 0 | 0 |
| 220223 | 1 | 0 | 0 | 0 | 0 |
| 223224 | 1 | 0 | 0 | 0 | 0 |
| 223225 | 1 | 0 | 0 | 0 | 0 |
| 223226 | 1 | 0 | 0 | 0 | 0 |
| 226227 | 1 | 0 | 0 | 0 | 0 |
| 226228 | 1 | 0 | 0 | 0 | 0 |
| 226229 | 1 | 0 | 0 | 0 | 0 |
| 229230 | 1 | 0 | 0 | 0 | 0 |
| 230231 | 1 | 0 | 0 | 0 | 0 |
| 230232 | 1 | 0 | 0 | 0 | 0 |
| 233234 | 1 | 0 | 0 | 0 | 0 |
| 233235 | 1 | 0 | 0 | 0 | 0 |
| 233236 | 1 | 0 | 0 | 0 | 0 |
| 233250 | 1 | 0 | 0 | 0 | 0 |
| 236237 | 1 | 0 | 0 | 0 | 0 |
| 236246 | 1 | 0 | 0 | 0 | 0 |
| 237238 | 1 | 0 | 0 | 0 | 0 |
| 237239 | 1 | 0 | 0 | 0 | 0 |
| 237240 | 1 | 0 | 0 | 0 | 0 |
| 240241 | 1 | 0 | 0 | 0 | 0 |
| 240242 | 1 | 0 | 0 | 0 | 0 |
| 240243 | 1 | 0 | 0 | 0 | 0 |
| 243244 | 1 | 0 | 0 | 0 | 0 |
| 243245 | 1 | 0 | 0 | 0 | 0 |
| 243249 | 1 | 0 | 0 | 0 | 0 |
| 246247 | 1 | 0 | 0 | 0 | 0 |
| 246248 | 1 | 0 | 0 | 0 | 0 |
| 246255 | 1 | 0 | 0 | 0 | 0 |
| 249275 | 1 | 0 | 0 | 0 | 0 |
| 250251 | 1 | 0 | 0 | 0 | 0 |
| 250252 | 1 | 0 | 0 | 0 | 0 |
| 250253 | 1 | 0 | 0 | 0 | 0 |
| 253254 | 1 | 0 | 0 | 0 | 0 |
| 255256 | 1 | 0 | 0 | 0 | 0 |
| 255257 | 1 | 0 | 0 | 0 | 0 |
| 255258 | 1 | 0 | 0 | 0 | 0 |
| 258259 | 1 | 0 | 0 | 0 | 0 |
| 260261 | 1 | 0 | 0 | 0 | 0 |
| 260262 | 1 | 0 | 0 | 0 | 0 |
| 260263 | 1 | 0 | 0 | 0 | 0 |
| 260307 | 1 | 0 | 0 | 0 | 0 |
| 263264 | 1 | 0 | 0 | 0 | 0 |
| 264265 | 1 | 0 | 0 | 0 | 0 |
| 264271 | 2 | 0 | 0 | 0 | 0 |
| 265266 | 1 | 0 | 0 | 0 | 0 |
| 265267 | 1 | 0 | 0 | 0 | 0 |
| 265268 | 1 | 0 | 0 | 0 | 0 |
| 268269 | 1 | 0 | 0 | 0 | 0 |
| 268270 | 1 | 0 | 0 | 0 | 0 |
| 268326 | 1 | 0 | 0 | 0 | 0 |
| 272273 | 1 | 0 | 0 | 0 | 0 |
| 272274 | 1 | 0 | 0 | 0 | 0 |
| 272282 | 1 | 0 | 0 | 0 | 0 |
| 272284 | 1 | 0 | 0 | 0 | 0 |
| 275276 | 1 | 0 | 0 | 0 | 0 |

|        |   |   |   |   |   |
|--------|---|---|---|---|---|
| 275277 | 1 | 0 | 0 | 0 | 0 |
| 275278 | 1 | 0 | 0 | 0 | 0 |
| 278279 | 1 | 0 | 0 | 0 | 0 |
| 278280 | 1 | 0 | 0 | 0 | 0 |
| 278281 | 1 | 0 | 0 | 0 | 0 |
| 281282 | 1 | 0 | 0 | 0 | 0 |
| 281283 | 2 | 0 | 0 | 0 | 0 |
| 284285 | 1 | 0 | 0 | 0 | 0 |
| 284286 | 1 | 0 | 0 | 0 | 0 |
| 284287 | 1 | 0 | 0 | 0 | 0 |
| 287288 | 1 | 0 | 0 | 0 | 0 |
| 288289 | 1 | 0 | 0 | 0 | 0 |
| 288290 | 1 | 0 | 0 | 0 | 0 |
| 288291 | 1 | 0 | 0 | 0 | 0 |
| 291292 | 1 | 0 | 0 | 0 | 0 |
| 291293 | 1 | 0 | 0 | 0 | 0 |
| 291294 | 1 | 0 | 0 | 0 | 0 |
| 294295 | 1 | 0 | 0 | 0 | 0 |
| 294296 | 1 | 0 | 0 | 0 | 0 |
| 294297 | 1 | 0 | 0 | 0 | 0 |
| 297298 | 1 | 0 | 0 | 0 | 0 |
| 297299 | 1 | 0 | 0 | 0 | 0 |
| 297300 | 1 | 0 | 0 | 0 | 0 |
| 300301 | 1 | 0 | 0 | 0 | 0 |
| 300302 | 1 | 0 | 0 | 0 | 0 |
| 300303 | 1 | 0 | 0 | 0 | 0 |
| 303304 | 1 | 0 | 0 | 0 | 0 |
| 303305 | 1 | 0 | 0 | 0 | 0 |
| 303306 | 1 | 0 | 0 | 0 | 0 |
| 306307 | 1 | 0 | 0 | 0 | 0 |
| 307308 | 1 | 0 | 0 | 0 | 0 |
| 307309 | 1 | 0 | 0 | 0 | 0 |
| 310311 | 1 | 0 | 0 | 0 | 0 |
| 310312 | 1 | 0 | 0 | 0 | 0 |
| 310313 | 1 | 0 | 0 | 0 | 0 |
| 310327 | 1 | 0 | 0 | 0 | 0 |
| 313314 | 1 | 0 | 0 | 0 | 0 |
| 313323 | 1 | 0 | 0 | 0 | 0 |
| 314315 | 1 | 0 | 0 | 0 | 0 |
| 314316 | 1 | 0 | 0 | 0 | 0 |
| 314317 | 1 | 0 | 0 | 0 | 0 |
| 317318 | 1 | 0 | 0 | 0 | 0 |
| 317319 | 1 | 0 | 0 | 0 | 0 |
| 317320 | 1 | 0 | 0 | 0 | 0 |
| 320321 | 1 | 0 | 0 | 0 | 0 |
| 320322 | 1 | 0 | 0 | 0 | 0 |
| 320326 | 1 | 0 | 0 | 0 | 0 |
| 323324 | 1 | 0 | 0 | 0 | 0 |
| 323325 | 1 | 0 | 0 | 0 | 0 |
| 323332 | 1 | 0 | 0 | 0 | 0 |
| 326353 | 1 | 0 | 0 | 0 | 0 |
| 327328 | 1 | 0 | 0 | 0 | 0 |
| 327329 | 1 | 0 | 0 | 0 | 0 |
| 327330 | 1 | 0 | 0 | 0 | 0 |
| 330331 | 1 | 0 | 0 | 0 | 0 |
| 332333 | 1 | 0 | 0 | 0 | 0 |
| 332334 | 1 | 0 | 0 | 0 | 0 |
| 332335 | 1 | 0 | 0 | 0 | 0 |
| 335336 | 1 | 0 | 0 | 0 | 0 |
| 337338 | 1 | 0 | 0 | 0 | 0 |
| 337339 | 1 | 0 | 0 | 0 | 0 |
| 337340 | 1 | 0 | 0 | 0 | 0 |
| 337385 | 1 | 0 | 0 | 0 | 0 |
| 340341 | 1 | 0 | 0 | 0 | 0 |
| 341342 | 1 | 0 | 0 | 0 | 0 |
| 341349 | 2 | 0 | 0 | 0 | 0 |
| 342343 | 1 | 0 | 0 | 0 | 0 |
| 342344 | 1 | 0 | 0 | 0 | 0 |
| 342345 | 1 | 0 | 0 | 0 | 0 |
| 345346 | 1 | 0 | 0 | 0 | 0 |
| 345347 | 1 | 0 | 0 | 0 | 0 |
| 345348 | 1 | 0 | 0 | 0 | 0 |
| 350351 | 1 | 0 | 0 | 0 | 0 |
| 350352 | 1 | 0 | 0 | 0 | 0 |
| 350360 | 1 | 0 | 0 | 0 | 0 |
| 350362 | 1 | 0 | 0 | 0 | 0 |
| 353354 | 1 | 0 | 0 | 0 | 0 |
| 353355 | 1 | 0 | 0 | 0 | 0 |
| 353356 | 1 | 0 | 0 | 0 | 0 |
| 356357 | 1 | 0 | 0 | 0 | 0 |
| 356358 | 1 | 0 | 0 | 0 | 0 |











|         |          |         |   |   |   |   |   |   |   |   |   |   |   |   |   |   |   |   |   |   |
|---------|----------|---------|---|---|---|---|---|---|---|---|---|---|---|---|---|---|---|---|---|---|
| 59.6440 | -18.8570 | 12.8000 | C | 0 | 0 | 0 | 0 | 0 | 0 | 0 | 0 | 0 | 0 | 0 | 0 | 0 | 0 | 0 | 0 | 0 |
| 59.8690 | -19.6470 | 13.5290 | H | 0 | 0 | 0 | 0 | 0 | 0 | 0 | 0 | 0 | 0 | 0 | 0 | 0 | 0 | 0 | 0 | 0 |
| 59.7870 | -19.3420 | 11.8250 | H | 0 | 0 | 0 | 0 | 0 | 0 | 0 | 0 | 0 | 0 | 0 | 0 | 0 | 0 | 0 | 0 | 0 |
| 60.6480 | -17.8050 | 12.9810 | N | 0 | 0 | 3 | 0 | 0 | 0 | 0 | 0 | 0 | 0 | 0 | 0 | 0 | 0 | 0 | 0 | 0 |
| 72.4790 | -11.7740 | 19.5780 | C | 0 | 0 | 0 | 0 | 0 | 0 | 0 | 0 | 0 | 0 | 0 | 0 | 0 | 0 | 0 | 0 | 0 |
| 72.4260 | -11.0730 | 18.7360 | H | 0 | 0 | 0 | 0 | 0 | 0 | 0 | 0 | 0 | 0 | 0 | 0 | 0 | 0 | 0 | 0 | 0 |
| 72.0390 | -12.7090 | 19.2160 | H | 0 | 0 | 0 | 0 | 0 | 0 | 0 | 0 | 0 | 0 | 0 | 0 | 0 | 0 | 0 | 0 | 0 |
| 73.8400 | -12.0670 | 19.9330 | O | 0 | 0 | 0 | 0 | 0 | 0 | 0 | 0 | 0 | 0 | 0 | 0 | 0 | 0 | 0 | 0 | 0 |
| 74.7080 | -11.0150 | 19.8950 | C | 0 | 0 | 0 | 0 | 0 | 0 | 0 | 0 | 0 | 0 | 0 | 0 | 0 | 0 | 0 | 0 | 0 |
| 76.0890 | -11.4980 | 20.2720 | C | 0 | 0 | 0 | 0 | 0 | 0 | 0 | 0 | 0 | 0 | 0 | 0 | 0 | 0 | 0 | 0 | 0 |
| 76.0460 | -11.9180 | 21.2820 | H | 0 | 0 | 0 | 0 | 0 | 0 | 0 | 0 | 0 | 0 | 0 | 0 | 0 | 0 | 0 | 0 | 0 |
| 76.3860 | -12.2830 | 19.5690 | H | 0 | 0 | 0 | 0 | 0 | 0 | 0 | 0 | 0 | 0 | 0 | 0 | 0 | 0 | 0 | 0 | 0 |
| 77.1150 | -10.3780 | 20.2360 | C | 0 | 0 | 0 | 0 | 0 | 0 | 0 | 0 | 0 | 0 | 0 | 0 | 0 | 0 | 0 | 0 | 0 |
| 77.1820 | -9.9380  | 19.2350 | H | 0 | 0 | 0 | 0 | 0 | 0 | 0 | 0 | 0 | 0 | 0 | 0 | 0 | 0 | 0 | 0 | 0 |
| 78.1040 | -10.7580 | 20.5090 | H | 0 | 0 | 0 | 0 | 0 | 0 | 0 | 0 | 0 | 0 | 0 | 0 | 0 | 0 | 0 | 0 | 0 |
| 76.8490 | -9.5790  | 20.9360 | H | 0 | 0 | 0 | 0 | 0 | 0 | 0 | 0 | 0 | 0 | 0 | 0 | 0 | 0 | 0 | 0 | 0 |
| 74.4130 | -9.8650  | 19.6080 | O | 0 | 0 | 0 | 0 | 0 | 0 | 0 | 0 | 0 | 0 | 0 | 0 | 0 | 0 | 0 | 0 | 0 |
| 61.3060 | -16.2320 | 18.7830 | C | 0 | 0 | 0 | 0 | 0 | 0 | 0 | 0 | 0 | 0 | 0 | 0 | 0 | 0 | 0 | 0 | 0 |
| 60.3110 | -15.8310 | 19.0170 | H | 0 | 0 | 0 | 0 | 0 | 0 | 0 | 0 | 0 | 0 | 0 | 0 | 0 | 0 | 0 | 0 | 0 |
| 61.5930 | -16.8410 | 19.6480 | H | 0 | 0 | 0 | 0 | 0 | 0 | 0 | 0 | 0 | 0 | 0 | 0 | 0 | 0 | 0 | 0 | 0 |
| 60.4820 | -16.9160 | 14.1270 | C | 0 | 0 | 0 | 0 | 0 | 0 | 0 | 0 | 0 | 0 | 0 | 0 | 0 | 0 | 0 | 0 | 0 |
| 61.2850 | -16.1670 | 14.1230 | H | 0 | 0 | 0 | 0 | 0 | 0 | 0 | 0 | 0 | 0 | 0 | 0 | 0 | 0 | 0 | 0 | 0 |
| 59.5430 | -16.3540 | 14.0560 | H | 0 | 0 | 0 | 0 | 0 | 0 | 0 | 0 | 0 | 0 | 0 | 0 | 0 | 0 | 0 | 0 | 0 |
| 60.5670 | -17.6550 | 15.4640 | C | 0 | 0 | 0 | 0 | 0 | 0 | 0 | 0 | 0 | 0 | 0 | 0 | 0 | 0 | 0 | 0 | 0 |
| 59.7490 | -18.3690 | 15.5990 | H | 0 | 0 | 0 | 0 | 0 | 0 | 0 | 0 | 0 | 0 | 0 | 0 | 0 | 0 | 0 | 0 | 0 |
| 61.5170 | -18.2010 | 15.5150 | H | 0 | 0 | 0 | 0 | 0 | 0 | 0 | 0 | 0 | 0 | 0 | 0 | 0 | 0 | 0 | 0 | 0 |
| 60.5070 | -16.6650 | 16.5960 | C | 0 | 0 | 0 | 0 | 0 | 0 | 0 | 0 | 0 | 0 | 0 | 0 | 0 | 0 | 0 | 0 | 0 |
| 61.2610 | -17.1030 | 17.6420 | O | 0 | 0 | 0 | 0 | 0 | 0 | 0 | 0 | 0 | 0 | 0 | 0 | 0 | 0 | 0 | 0 | 0 |
| 59.8610 | -15.6260 | 16.5750 | O | 0 | 0 | 0 | 0 | 0 | 0 | 0 | 0 | 0 | 0 | 0 | 0 | 0 | 0 | 0 | 0 | 0 |
| 62.3260 | -15.1180 | 18.5770 | C | 0 | 0 | 0 | 0 | 0 | 0 | 0 | 0 | 0 | 0 | 0 | 0 | 0 | 0 | 0 | 0 | 0 |
| 63.3080 | -15.5570 | 18.3720 | H | 0 | 0 | 0 | 0 | 0 | 0 | 0 | 0 | 0 | 0 | 0 | 0 | 0 | 0 | 0 | 0 | 0 |
| 62.0490 | -14.5030 | 17.7130 | H | 0 | 0 | 0 | 0 | 0 | 0 | 0 | 0 | 0 | 0 | 0 | 0 | 0 | 0 | 0 | 0 | 0 |
| 62.3680 | -14.3120 | 19.7510 | O | 0 | 0 | 0 | 0 | 0 | 0 | 0 | 0 | 0 | 0 | 0 | 0 | 0 | 0 | 0 | 0 | 0 |
| 63.2710 | -13.2110 | 19.6480 | C | 0 | 0 | 0 | 0 | 0 | 0 | 0 | 0 | 0 | 0 | 0 | 0 | 0 | 0 | 0 | 0 | 0 |
| 63.1810 | -12.7290 | 18.6670 | H | 0 | 0 | 0 | 0 | 0 | 0 | 0 | 0 | 0 | 0 | 0 | 0 | 0 | 0 | 0 | 0 | 0 |
| 62.9590 | -12.4780 | 20.3990 | H | 0 | 0 | 0 | 0 | 0 | 0 | 0 | 0 | 0 | 0 | 0 | 0 | 0 | 0 | 0 | 0 | 0 |
| 64.7100 | -13.6430 | 19.9320 | C | 0 | 0 | 0 | 0 | 0 | 0 | 0 | 0 | 0 | 0 | 0 | 0 | 0 | 0 | 0 | 0 | 0 |
| 64.7470 | -14.1560 | 20.9010 | H | 0 | 0 | 0 | 0 | 0 | 0 | 0 | 0 | 0 | 0 | 0 | 0 | 0 | 0 | 0 | 0 | 0 |
| 65.0350 | -14.3800 | 19.1900 | H | 0 | 0 | 0 | 0 | 0 | 0 | 0 | 0 | 0 | 0 | 0 | 0 | 0 | 0 | 0 | 0 | 0 |
| 65.6710 | -12.4530 | 19.9260 | C | 0 | 0 | 0 | 0 | 0 | 0 | 0 | 0 | 0 | 0 | 0 | 0 | 0 | 0 | 0 | 0 | 0 |
| 65.6310 | -11.9550 | 18.9490 | H | 0 | 0 | 0 | 0 | 0 | 0 | 0 | 0 | 0 | 0 | 0 | 0 | 0 | 0 | 0 | 0 | 0 |
| 65.3520 | -11.7190 | 20.6760 | H | 0 | 0 | 0 | 0 | 0 | 0 | 0 | 0 | 0 | 0 | 0 | 0 | 0 | 0 | 0 | 0 | 0 |
| 67.1080 | -12.8920 | 20.2190 | C | 0 | 0 | 0 | 0 | 0 | 0 | 0 | 0 | 0 | 0 | 0 | 0 | 0 | 0 | 0 | 0 | 0 |
| 67.1480 | -13.3830 | 21.1990 | H | 0 | 0 | 0 | 0 | 0 | 0 | 0 | 0 | 0 | 0 | 0 | 0 | 0 | 0 | 0 | 0 | 0 |
| 67.4250 | -13.6320 | 19.4740 | H | 0 | 0 | 0 | 0 | 0 | 0 | 0 | 0 | 0 | 0 | 0 | 0 | 0 | 0 | 0 | 0 | 0 |
| 68.0730 | -11.7060 | 20.2020 | C | 0 | 0 | 0 | 0 | 0 | 0 | 0 | 0 | 0 | 0 | 0 | 0 | 0 | 0 | 0 | 0 | 0 |
| 68.0430 | -11.2080 | 19.2250 | H | 0 | 0 | 0 | 0 | 0 | 0 | 0 | 0 | 0 | 0 | 0 | 0 | 0 | 0 | 0 | 0 | 0 |
| 67.7590 | -10.9510 | 20.9340 | H | 0 | 0 | 0 | 0 | 0 | 0 | 0 | 0 | 0 | 0 | 0 | 0 | 0 | 0 | 0 | 0 | 0 |
| 69.5060 | -12.1370 | 20.5040 | C | 0 | 0 | 0 | 0 | 0 | 0 | 0 | 0 | 0 | 0 | 0 | 0 | 0 | 0 | 0 | 0 | 0 |
| 69.5580 | -12.5920 | 21.5000 | H | 0 | 0 | 0 | 0 | 0 | 0 | 0 | 0 | 0 | 0 | 0 | 0 | 0 | 0 | 0 | 0 | 0 |
| 69.8420 | -12.8650 | 19.7600 | H | 0 | 0 | 0 | 0 | 0 | 0 | 0 | 0 | 0 | 0 | 0 | 0 | 0 | 0 | 0 | 0 | 0 |
| 70.3400 | -10.9790 | 20.4660 | O | 0 | 0 | 0 | 0 | 0 | 0 | 0 | 0 | 0 | 0 | 0 | 0 | 0 | 0 | 0 | 0 | 0 |
| 71.7040 | -11.2530 | 20.7850 | C | 0 | 0 | 0 | 0 | 0 | 0 | 0 | 0 | 0 | 0 | 0 | 0 | 0 | 0 | 0 | 0 | 0 |
| 71.7780 | -11.9430 | 21.6340 | H | 0 | 0 | 0 | 0 | 0 | 0 | 0 | 0 | 0 | 0 | 0 | 0 | 0 | 0 | 0 | 0 | 0 |
| 72.1500 | -10.3110 | 21.1240 | H | 0 | 0 | 0 | 0 | 0 | 0 | 0 | 0 | 0 | 0 | 0 | 0 | 0 | 0 | 0 | 0 | 0 |
| 1       | 2        | 1       | 0 | 0 | 0 | 0 | 0 | 0 | 0 | 0 | 0 | 0 | 0 | 0 | 0 | 0 | 0 | 0 | 0 | 0 |
| 1       | 7        | 1       | 0 | 0 | 0 | 0 | 0 | 0 | 0 | 0 | 0 | 0 | 0 | 0 | 0 | 0 | 0 | 0 | 0 | 0 |
| 1       | 9        | 1       | 0 | 0 | 0 | 0 | 0 | 0 | 0 | 0 | 0 | 0 | 0 | 0 | 0 | 0 | 0 | 0 | 0 | 0 |
| 2       | 3        | 1       | 0 | 0 | 0 | 0 | 0 | 0 | 0 | 0 | 0 | 0 | 0 | 0 | 0 | 0 | 0 | 0 | 0 | 0 |
| 2       | 4        | 2       | 0 | 0 | 0 | 0 | 0 | 0 | 0 | 0 | 0 | 0 | 0 | 0 | 0 | 0 | 0 | 0 | 0 | 0 |
| 4       | 5        | 1       | 0 | 0 | 0 | 0 | 0 | 0 | 0 | 0 | 0 | 0 | 0 | 0 | 0 | 0 | 0 | 0 | 0 | 0 |
| 4       | 6        | 1       | 0 | 0 | 0 | 0 | 0 | 0 | 0 | 0 | 0 | 0 | 0 | 0 | 0 | 0 | 0 | 0 | 0 | 0 |
| 6       | 7        | 2       | 0 | 0 | 0 | 0 | 0 | 0 | 0 | 0 | 0 | 0 | 0 | 0 | 0 | 0 | 0 | 0 | 0 | 0 |
| 7       | 8        | 1       | 0 | 0 | 0 | 0 | 0 | 0 | 0 | 0 | 0 | 0 | 0 | 0 | 0 | 0 | 0 | 0 | 0 | 0 |
| 9       | 10       | 1       | 0 | 0 | 0 | 0 | 0 | 0 | 0 | 0 | 0 | 0 | 0 | 0 | 0 | 0 | 0 | 0 | 0 | 0 |
| 9       | 11       | 1       | 0 | 0 | 0 | 0 | 0 | 0 | 0 | 0 | 0 | 0 | 0 | 0 | 0 | 0 | 0 | 0 | 0 | 0 |
| 9       | 12       | 1       | 0 | 0 | 0 | 0 | 0 | 0 | 0 | 0 | 0 | 0 | 0 | 0 | 0 | 0 | 0 | 0 | 0 | 0 |
| 12      | 13       | 1       | 0 | 0 | 0 | 0 | 0 | 0 | 0 | 0 | 0 | 0 | 0 | 0 | 0 | 0 | 0 | 0 | 0 | 0 |
| 12      | 14       | 1       | 0 | 0 | 0 | 0 | 0 | 0 | 0 | 0 | 0 | 0 | 0 | 0 | 0 | 0 | 0 | 0 | 0 | 0 |
| 12      | 15       | 1       | 0 | 0 | 0 | 0 | 0 | 0 | 0 | 0 | 0 | 0 | 0 | 0 | 0 | 0 | 0 | 0 | 0 | 0 |
| 15      | 16       | 1       | 0 | 0 | 0 | 0 | 0 | 0 | 0 | 0 | 0 | 0 | 0 | 0 | 0 | 0 | 0 | 0 | 0 | 0 |
| 15      | 17       | 1       | 0 | 0 | 0 | 0 | 0 | 0 | 0 | 0 | 0 | 0 | 0 | 0 | 0 | 0 | 0 | 0 | 0 | 0 |
| 15      | 18       | 1       | 0 | 0 | 0 | 0 | 0 | 0 | 0 | 0 | 0 | 0 | 0 | 0 | 0 | 0 | 0 | 0 | 0 | 0 |
| 18      | 19       | 1       | 0 | 0 | 0 | 0 | 0 | 0 | 0 | 0 | 0 | 0 | 0 | 0 | 0 | 0 | 0 | 0 | 0 | 0 |
| 18      | 35       | 1       | 0 | 0 | 0 | 0 | 0 | 0 | 0 | 0 | 0 | 0 | 0 | 0 | 0 | 0 | 0 | 0 | 0 | 0 |
| 20      | 21       | 1       | 0 | 0 | 0 | 0 | 0 | 0 | 0 | 0 | 0 | 0 | 0 | 0 | 0 | 0 | 0 | 0 | 0 | 0 |
| 20      | 22       | 1       | 0 | 0 | 0 | 0 | 0 | 0 | 0 | 0 | 0 | 0 | 0 | 0 | 0 | 0 | 0 | 0 | 0 | 0 |
| 20      | 23       | 1       | 0 | 0 | 0 | 0 | 0 | 0 | 0 | 0 | 0 | 0 | 0 | 0 | 0 | 0 | 0 | 0 | 0 | 0 |
| 20      | 67       | 1       | 0 | 0 | 0 | 0 | 0 | 0 | 0 | 0 | 0 | 0 | 0 | 0 | 0 | 0 | 0 | 0 | 0 | 0 |
| 23      | 24       | 1       | 0 | 0 | 0 | 0 | 0 | 0 | 0 | 0 | 0 | 0 | 0 | 0 | 0 | 0 | 0 | 0 | 0 | 0 |
| 24      | 25       | 1       | 0 | 0 | 0 | 0 | 0 | 0 | 0 | 0 | 0 | 0 | 0 | 0 | 0 | 0 | 0 | 0 | 0 | 0 |

|     |     |   |   |   |   |   |
|-----|-----|---|---|---|---|---|
| 24  | 31  | 2 | 0 | 0 | 0 | 0 |
| 25  | 26  | 1 | 0 | 0 | 0 | 0 |
| 25  | 27  | 1 | 0 | 0 | 0 | 0 |
| 25  | 28  | 1 | 0 | 0 | 0 | 0 |
| 28  | 29  | 1 | 0 | 0 | 0 | 0 |
| 28  | 30  | 1 | 0 | 0 | 0 | 0 |
| 28  | 87  | 1 | 0 | 0 | 0 | 0 |
| 32  | 33  | 1 | 0 | 0 | 0 | 0 |
| 32  | 34  | 1 | 0 | 0 | 0 | 0 |
| 32  | 42  | 1 | 0 | 0 | 0 | 0 |
| 32  | 44  | 1 | 0 | 0 | 0 | 0 |
| 35  | 36  | 1 | 0 | 0 | 0 | 0 |
| 35  | 37  | 1 | 0 | 0 | 0 | 0 |
| 35  | 38  | 1 | 0 | 0 | 0 | 0 |
| 38  | 39  | 1 | 0 | 0 | 0 | 0 |
| 38  | 40  | 1 | 0 | 0 | 0 | 0 |
| 38  | 41  | 1 | 0 | 0 | 0 | 0 |
| 41  | 42  | 1 | 0 | 0 | 0 | 0 |
| 41  | 43  | 2 | 0 | 0 | 0 | 0 |
| 44  | 45  | 1 | 0 | 0 | 0 | 0 |
| 44  | 46  | 1 | 0 | 0 | 0 | 0 |
| 44  | 47  | 1 | 0 | 0 | 0 | 0 |
| 47  | 48  | 1 | 0 | 0 | 0 | 0 |
| 48  | 49  | 1 | 0 | 0 | 0 | 0 |
| 48  | 50  | 1 | 0 | 0 | 0 | 0 |
| 48  | 51  | 1 | 0 | 0 | 0 | 0 |
| 51  | 52  | 1 | 0 | 0 | 0 | 0 |
| 51  | 53  | 1 | 0 | 0 | 0 | 0 |
| 51  | 54  | 1 | 0 | 0 | 0 | 0 |
| 54  | 55  | 1 | 0 | 0 | 0 | 0 |
| 54  | 56  | 1 | 0 | 0 | 0 | 0 |
| 54  | 57  | 1 | 0 | 0 | 0 | 0 |
| 57  | 58  | 1 | 0 | 0 | 0 | 0 |
| 57  | 59  | 1 | 0 | 0 | 0 | 0 |
| 57  | 60  | 1 | 0 | 0 | 0 | 0 |
| 60  | 61  | 1 | 0 | 0 | 0 | 0 |
| 60  | 62  | 1 | 0 | 0 | 0 | 0 |
| 60  | 63  | 1 | 0 | 0 | 0 | 0 |
| 63  | 64  | 1 | 0 | 0 | 0 | 0 |
| 63  | 65  | 1 | 0 | 0 | 0 | 0 |
| 63  | 66  | 1 | 0 | 0 | 0 | 0 |
| 66  | 67  | 1 | 0 | 0 | 0 | 0 |
| 67  | 68  | 1 | 0 | 0 | 0 | 0 |
| 67  | 69  | 1 | 0 | 0 | 0 | 0 |
| 70  | 71  | 1 | 0 | 0 | 0 | 0 |
| 70  | 76  | 1 | 0 | 0 | 0 | 0 |
| 70  | 78  | 1 | 0 | 0 | 0 | 0 |
| 71  | 72  | 1 | 0 | 0 | 0 | 0 |
| 71  | 73  | 2 | 0 | 0 | 0 | 0 |
| 73  | 74  | 1 | 0 | 0 | 0 | 0 |
| 73  | 75  | 1 | 0 | 0 | 0 | 0 |
| 75  | 76  | 2 | 0 | 0 | 0 | 0 |
| 76  | 77  | 1 | 0 | 0 | 0 | 0 |
| 78  | 79  | 1 | 0 | 0 | 0 | 0 |
| 78  | 80  | 1 | 0 | 0 | 0 | 0 |
| 78  | 81  | 1 | 0 | 0 | 0 | 0 |
| 81  | 82  | 1 | 0 | 0 | 0 | 0 |
| 81  | 83  | 1 | 0 | 0 | 0 | 0 |
| 81  | 84  | 1 | 0 | 0 | 0 | 0 |
| 84  | 85  | 1 | 0 | 0 | 0 | 0 |
| 84  | 86  | 1 | 0 | 0 | 0 | 0 |
| 84  | 87  | 1 | 0 | 0 | 0 | 0 |
| 87  | 103 | 1 | 0 | 0 | 0 | 0 |
| 88  | 89  | 1 | 0 | 0 | 0 | 0 |
| 88  | 90  | 1 | 0 | 0 | 0 | 0 |
| 88  | 91  | 1 | 0 | 0 | 0 | 0 |
| 88  | 135 | 1 | 0 | 0 | 0 | 0 |
| 91  | 92  | 1 | 0 | 0 | 0 | 0 |
| 92  | 93  | 1 | 0 | 0 | 0 | 0 |
| 92  | 99  | 2 | 0 | 0 | 0 | 0 |
| 93  | 94  | 1 | 0 | 0 | 0 | 0 |
| 93  | 95  | 1 | 0 | 0 | 0 | 0 |
| 93  | 96  | 1 | 0 | 0 | 0 | 0 |
| 96  | 97  | 1 | 0 | 0 | 0 | 0 |
| 96  | 98  | 1 | 0 | 0 | 0 | 0 |
| 96  | 155 | 1 | 0 | 0 | 0 | 0 |
| 100 | 101 | 1 | 0 | 0 | 0 | 0 |
| 100 | 102 | 1 | 0 | 0 | 0 | 0 |
| 100 | 110 | 1 | 0 | 0 | 0 | 0 |
| 100 | 112 | 1 | 0 | 0 | 0 | 0 |
| 103 | 104 | 1 | 0 | 0 | 0 | 0 |

|        |   |   |   |   |   |
|--------|---|---|---|---|---|
| 103105 | 1 | 0 | 0 | 0 | 0 |
| 103106 | 1 | 0 | 0 | 0 | 0 |
| 106107 | 1 | 0 | 0 | 0 | 0 |
| 106108 | 1 | 0 | 0 | 0 | 0 |
| 106109 | 1 | 0 | 0 | 0 | 0 |
| 109110 | 1 | 0 | 0 | 0 | 0 |
| 109111 | 2 | 0 | 0 | 0 | 0 |
| 112113 | 1 | 0 | 0 | 0 | 0 |
| 112114 | 1 | 0 | 0 | 0 | 0 |
| 112115 | 1 | 0 | 0 | 0 | 0 |
| 115116 | 1 | 0 | 0 | 0 | 0 |
| 116117 | 1 | 0 | 0 | 0 | 0 |
| 116118 | 1 | 0 | 0 | 0 | 0 |
| 116119 | 1 | 0 | 0 | 0 | 0 |
| 119120 | 1 | 0 | 0 | 0 | 0 |
| 119121 | 1 | 0 | 0 | 0 | 0 |
| 119122 | 1 | 0 | 0 | 0 | 0 |
| 122123 | 1 | 0 | 0 | 0 | 0 |
| 122124 | 1 | 0 | 0 | 0 | 0 |
| 122125 | 1 | 0 | 0 | 0 | 0 |
| 125126 | 1 | 0 | 0 | 0 | 0 |
| 125127 | 1 | 0 | 0 | 0 | 0 |
| 125128 | 1 | 0 | 0 | 0 | 0 |
| 128129 | 1 | 0 | 0 | 0 | 0 |
| 128130 | 1 | 0 | 0 | 0 | 0 |
| 128131 | 1 | 0 | 0 | 0 | 0 |
| 131132 | 1 | 0 | 0 | 0 | 0 |
| 131133 | 1 | 0 | 0 | 0 | 0 |
| 131134 | 1 | 0 | 0 | 0 | 0 |
| 134135 | 1 | 0 | 0 | 0 | 0 |
| 135136 | 1 | 0 | 0 | 0 | 0 |
| 135137 | 1 | 0 | 0 | 0 | 0 |
| 138139 | 1 | 0 | 0 | 0 | 0 |
| 138144 | 1 | 0 | 0 | 0 | 0 |
| 138146 | 1 | 0 | 0 | 0 | 0 |
| 139140 | 1 | 0 | 0 | 0 | 0 |
| 139141 | 2 | 0 | 0 | 0 | 0 |
| 141142 | 1 | 0 | 0 | 0 | 0 |
| 141143 | 1 | 0 | 0 | 0 | 0 |
| 143144 | 2 | 0 | 0 | 0 | 0 |
| 144145 | 1 | 0 | 0 | 0 | 0 |
| 146147 | 1 | 0 | 0 | 0 | 0 |
| 146148 | 1 | 0 | 0 | 0 | 0 |
| 146149 | 1 | 0 | 0 | 0 | 0 |
| 149150 | 1 | 0 | 0 | 0 | 0 |
| 149151 | 1 | 0 | 0 | 0 | 0 |
| 149152 | 1 | 0 | 0 | 0 | 0 |
| 152153 | 1 | 0 | 0 | 0 | 0 |
| 152154 | 1 | 0 | 0 | 0 | 0 |
| 152155 | 1 | 0 | 0 | 0 | 0 |
| 155171 | 1 | 0 | 0 | 0 | 0 |
| 156157 | 1 | 0 | 0 | 0 | 0 |
| 156158 | 1 | 0 | 0 | 0 | 0 |
| 156159 | 1 | 0 | 0 | 0 | 0 |
| 156203 | 1 | 0 | 0 | 0 | 0 |
| 159160 | 1 | 0 | 0 | 0 | 0 |
| 160161 | 1 | 0 | 0 | 0 | 0 |
| 160167 | 2 | 0 | 0 | 0 | 0 |
| 161162 | 1 | 0 | 0 | 0 | 0 |
| 161163 | 1 | 0 | 0 | 0 | 0 |
| 161164 | 1 | 0 | 0 | 0 | 0 |
| 164165 | 1 | 0 | 0 | 0 | 0 |
| 164166 | 1 | 0 | 0 | 0 | 0 |
| 164223 | 1 | 0 | 0 | 0 | 0 |
| 168169 | 1 | 0 | 0 | 0 | 0 |
| 168170 | 1 | 0 | 0 | 0 | 0 |
| 168178 | 1 | 0 | 0 | 0 | 0 |
| 168180 | 1 | 0 | 0 | 0 | 0 |
| 171172 | 1 | 0 | 0 | 0 | 0 |
| 171173 | 1 | 0 | 0 | 0 | 0 |
| 171174 | 1 | 0 | 0 | 0 | 0 |
| 174175 | 1 | 0 | 0 | 0 | 0 |
| 174176 | 1 | 0 | 0 | 0 | 0 |
| 174177 | 1 | 0 | 0 | 0 | 0 |
| 177178 | 1 | 0 | 0 | 0 | 0 |
| 177179 | 2 | 0 | 0 | 0 | 0 |
| 180181 | 1 | 0 | 0 | 0 | 0 |
| 180182 | 1 | 0 | 0 | 0 | 0 |
| 180183 | 1 | 0 | 0 | 0 | 0 |
| 183184 | 1 | 0 | 0 | 0 | 0 |
| 184185 | 1 | 0 | 0 | 0 | 0 |

|        |   |   |   |   |   |
|--------|---|---|---|---|---|
| 184186 | 1 | 0 | 0 | 0 | 0 |
| 184187 | 1 | 0 | 0 | 0 | 0 |
| 187188 | 1 | 0 | 0 | 0 | 0 |
| 187189 | 1 | 0 | 0 | 0 | 0 |
| 187190 | 1 | 0 | 0 | 0 | 0 |
| 190191 | 1 | 0 | 0 | 0 | 0 |
| 190192 | 1 | 0 | 0 | 0 | 0 |
| 190193 | 1 | 0 | 0 | 0 | 0 |
| 193194 | 1 | 0 | 0 | 0 | 0 |
| 193195 | 1 | 0 | 0 | 0 | 0 |
| 193196 | 1 | 0 | 0 | 0 | 0 |
| 196197 | 1 | 0 | 0 | 0 | 0 |
| 196198 | 1 | 0 | 0 | 0 | 0 |
| 196199 | 1 | 0 | 0 | 0 | 0 |
| 199200 | 1 | 0 | 0 | 0 | 0 |
| 199201 | 1 | 0 | 0 | 0 | 0 |
| 199202 | 1 | 0 | 0 | 0 | 0 |
| 202203 | 1 | 0 | 0 | 0 | 0 |
| 203204 | 1 | 0 | 0 | 0 | 0 |
| 203205 | 1 | 0 | 0 | 0 | 0 |
| 206207 | 1 | 0 | 0 | 0 | 0 |
| 206212 | 1 | 0 | 0 | 0 | 0 |
| 206214 | 1 | 0 | 0 | 0 | 0 |
| 207208 | 1 | 0 | 0 | 0 | 0 |
| 207209 | 2 | 0 | 0 | 0 | 0 |
| 209210 | 1 | 0 | 0 | 0 | 0 |
| 209211 | 1 | 0 | 0 | 0 | 0 |
| 211212 | 2 | 0 | 0 | 0 | 0 |
| 212213 | 1 | 0 | 0 | 0 | 0 |
| 214215 | 1 | 0 | 0 | 0 | 0 |
| 214216 | 1 | 0 | 0 | 0 | 0 |
| 214217 | 1 | 0 | 0 | 0 | 0 |
| 217218 | 1 | 0 | 0 | 0 | 0 |
| 217219 | 1 | 0 | 0 | 0 | 0 |
| 217220 | 1 | 0 | 0 | 0 | 0 |
| 220221 | 1 | 0 | 0 | 0 | 0 |
| 220222 | 1 | 0 | 0 | 0 | 0 |
| 220223 | 1 | 0 | 0 | 0 | 0 |
| 223239 | 1 | 0 | 0 | 0 | 0 |
| 224225 | 1 | 0 | 0 | 0 | 0 |
| 224226 | 1 | 0 | 0 | 0 | 0 |
| 224227 | 1 | 0 | 0 | 0 | 0 |
| 224271 | 1 | 0 | 0 | 0 | 0 |
| 227228 | 1 | 0 | 0 | 0 | 0 |
| 228229 | 1 | 0 | 0 | 0 | 0 |
| 228235 | 2 | 0 | 0 | 0 | 0 |
| 229230 | 1 | 0 | 0 | 0 | 0 |
| 229231 | 1 | 0 | 0 | 0 | 0 |
| 229232 | 1 | 0 | 0 | 0 | 0 |
| 232233 | 1 | 0 | 0 | 0 | 0 |
| 232234 | 1 | 0 | 0 | 0 | 0 |
| 232291 | 1 | 0 | 0 | 0 | 0 |
| 236237 | 1 | 0 | 0 | 0 | 0 |
| 236238 | 1 | 0 | 0 | 0 | 0 |
| 236246 | 1 | 0 | 0 | 0 | 0 |
| 236248 | 1 | 0 | 0 | 0 | 0 |
| 239240 | 1 | 0 | 0 | 0 | 0 |
| 239241 | 1 | 0 | 0 | 0 | 0 |
| 239242 | 1 | 0 | 0 | 0 | 0 |
| 242243 | 1 | 0 | 0 | 0 | 0 |
| 242244 | 1 | 0 | 0 | 0 | 0 |
| 242245 | 1 | 0 | 0 | 0 | 0 |
| 245246 | 1 | 0 | 0 | 0 | 0 |
| 245247 | 2 | 0 | 0 | 0 | 0 |
| 248249 | 1 | 0 | 0 | 0 | 0 |
| 248250 | 1 | 0 | 0 | 0 | 0 |
| 248251 | 1 | 0 | 0 | 0 | 0 |
| 251252 | 1 | 0 | 0 | 0 | 0 |
| 252253 | 1 | 0 | 0 | 0 | 0 |
| 252254 | 1 | 0 | 0 | 0 | 0 |
| 252255 | 1 | 0 | 0 | 0 | 0 |
| 255256 | 1 | 0 | 0 | 0 | 0 |
| 255257 | 1 | 0 | 0 | 0 | 0 |
| 255258 | 1 | 0 | 0 | 0 | 0 |
| 258259 | 1 | 0 | 0 | 0 | 0 |
| 258260 | 1 | 0 | 0 | 0 | 0 |
| 258261 | 1 | 0 | 0 | 0 | 0 |
| 261262 | 1 | 0 | 0 | 0 | 0 |
| 261263 | 1 | 0 | 0 | 0 | 0 |
| 261264 | 1 | 0 | 0 | 0 | 0 |
| 264265 | 1 | 0 | 0 | 0 | 0 |



|        |   |   |   |   |   |
|--------|---|---|---|---|---|
| 264266 | 1 | 0 | 0 | 0 | 0 |
| 264267 | 1 | 0 | 0 | 0 | 0 |
| 267268 | 1 | 0 | 0 | 0 | 0 |
| 267269 | 1 | 0 | 0 | 0 | 0 |
| 267270 | 1 | 0 | 0 | 0 | 0 |
| 270271 | 1 | 0 | 0 | 0 | 0 |
| 271272 | 1 | 0 | 0 | 0 | 0 |
| 271273 | 1 | 0 | 0 | 0 | 0 |
| 274275 | 1 | 0 | 0 | 0 | 0 |
| 274280 | 1 | 0 | 0 | 0 | 0 |
| 274282 | 1 | 0 | 0 | 0 | 0 |
| 275276 | 1 | 0 | 0 | 0 | 0 |
| 275277 | 2 | 0 | 0 | 0 | 0 |
| 277278 | 1 | 0 | 0 | 0 | 0 |
| 277279 | 1 | 0 | 0 | 0 | 0 |
| 279280 | 2 | 0 | 0 | 0 | 0 |
| 280281 | 1 | 0 | 0 | 0 | 0 |
| 282283 | 1 | 0 | 0 | 0 | 0 |
| 282284 | 1 | 0 | 0 | 0 | 0 |
| 282285 | 1 | 0 | 0 | 0 | 0 |
| 285286 | 1 | 0 | 0 | 0 | 0 |
| 285287 | 1 | 0 | 0 | 0 | 0 |
| 285288 | 1 | 0 | 0 | 0 | 0 |
| 288289 | 1 | 0 | 0 | 0 | 0 |
| 288290 | 1 | 0 | 0 | 0 | 0 |
| 288291 | 1 | 0 | 0 | 0 | 0 |
| 291308 | 1 | 0 | 0 | 0 | 0 |
| 292293 | 1 | 0 | 0 | 0 | 0 |
| 292294 | 1 | 0 | 0 | 0 | 0 |
| 292295 | 1 | 0 | 0 | 0 | 0 |
| 292340 | 1 | 0 | 0 | 0 | 0 |
| 295296 | 1 | 0 | 0 | 0 | 0 |
| 296297 | 1 | 0 | 0 | 0 | 0 |
| 296304 | 2 | 0 | 0 | 0 | 0 |
| 297298 | 1 | 0 | 0 | 0 | 0 |
| 297299 | 1 | 0 | 0 | 0 | 0 |
| 297300 | 1 | 0 | 0 | 0 | 0 |
| 300301 | 1 | 0 | 0 | 0 | 0 |
| 300302 | 1 | 0 | 0 | 0 | 0 |
| 300303 | 1 | 0 | 0 | 0 | 0 |
| 305306 | 1 | 0 | 0 | 0 | 0 |
| 305307 | 1 | 0 | 0 | 0 | 0 |
| 305315 | 1 | 0 | 0 | 0 | 0 |
| 305317 | 1 | 0 | 0 | 0 | 0 |
| 308309 | 1 | 0 | 0 | 0 | 0 |
| 308310 | 1 | 0 | 0 | 0 | 0 |
| 308311 | 1 | 0 | 0 | 0 | 0 |
| 311312 | 1 | 0 | 0 | 0 | 0 |
| 311313 | 1 | 0 | 0 | 0 | 0 |
| 311314 | 1 | 0 | 0 | 0 | 0 |
| 314315 | 1 | 0 | 0 | 0 | 0 |
| 314316 | 2 | 0 | 0 | 0 | 0 |
| 317318 | 1 | 0 | 0 | 0 | 0 |
| 317319 | 1 | 0 | 0 | 0 | 0 |
| 317320 | 1 | 0 | 0 | 0 | 0 |
| 320321 | 1 | 0 | 0 | 0 | 0 |
| 321322 | 1 | 0 | 0 | 0 | 0 |
| 321323 | 1 | 0 | 0 | 0 | 0 |
| 321324 | 1 | 0 | 0 | 0 | 0 |
| 324325 | 1 | 0 | 0 | 0 | 0 |
| 324326 | 1 | 0 | 0 | 0 | 0 |
| 324327 | 1 | 0 | 0 | 0 | 0 |
| 327328 | 1 | 0 | 0 | 0 | 0 |
| 327329 | 1 | 0 | 0 | 0 | 0 |
| 327330 | 1 | 0 | 0 | 0 | 0 |
| 330331 | 1 | 0 | 0 | 0 | 0 |
| 330332 | 1 | 0 | 0 | 0 | 0 |
| 330333 | 1 | 0 | 0 | 0 | 0 |
| 333334 | 1 | 0 | 0 | 0 | 0 |
| 333335 | 1 | 0 | 0 | 0 | 0 |
| 333336 | 1 | 0 | 0 | 0 | 0 |
| 336337 | 1 | 0 | 0 | 0 | 0 |
| 336338 | 1 | 0 | 0 | 0 | 0 |
| 336339 | 1 | 0 | 0 | 0 | 0 |
| 339340 | 1 | 0 | 0 | 0 | 0 |
| 340341 | 1 | 0 | 0 | 0 | 0 |
| 340342 | 1 | 0 | 0 | 0 | 0 |

M END  
> <NAME>  
U93\_1

\$\$\$
