# Supplementary material
Source: PubMed Central journal article supplement (PMC4316747)
Supplement: NIHMS582975-supplement-2.pdf [file NIHMS582975-supplement-2.pdf]

|    |     |   |   |   |   |   |
|----|-----|---|---|---|---|---|
| 1  | 2   | 1 | 0 | 0 | 0 | 0 |
| 1  | 3   | 1 | 0 | 0 | 0 | 0 |
| 3  | 4   | 1 | 0 | 0 | 0 | 0 |
| 3  | 5   | 1 | 0 | 0 | 0 | 0 |
| 3  | 6   | 1 | 0 | 0 | 0 | 0 |
| 6  | 7   | 1 | 0 | 0 | 0 | 0 |
| 6  | 8   | 1 | 0 | 0 | 0 | 0 |
| 6  | 9   | 1 | 0 | 0 | 0 | 0 |
| 9  | 10  | 1 | 0 | 0 | 0 | 0 |
| 9  | 11  | 1 | 0 | 0 | 0 | 0 |
| 9  | 12  | 1 | 0 | 0 | 0 | 0 |
| 12 | 13  | 1 | 0 | 0 | 0 | 0 |
| 12 | 25  | 1 | 0 | 0 | 0 | 0 |
| 14 | 15  | 1 | 0 | 0 | 0 | 0 |
| 14 | 23  | 2 | 0 | 0 | 0 | 0 |
| 14 | 61  | 1 | 0 | 0 | 0 | 0 |
| 15 | 16  | 1 | 0 | 0 | 0 | 0 |
| 15 | 17  | 2 | 0 | 0 | 0 | 0 |
| 17 | 18  | 1 | 0 | 0 | 0 | 0 |
| 17 | 19  | 1 | 0 | 0 | 0 | 0 |
| 19 | 20  | 1 | 0 | 0 | 0 | 0 |
| 19 | 21  | 2 | 0 | 0 | 0 | 0 |
| 21 | 22  | 1 | 0 | 0 | 0 | 0 |
| 21 | 23  | 1 | 0 | 0 | 0 | 0 |
| 23 | 24  | 1 | 0 | 0 | 0 | 0 |
| 25 | 26  | 1 | 0 | 0 | 0 | 0 |
| 25 | 27  | 1 | 0 | 0 | 0 | 0 |
| 25 | 28  | 1 | 0 | 0 | 0 | 0 |
| 28 | 29  | 1 | 0 | 0 | 0 | 0 |
| 28 | 30  | 1 | 0 | 0 | 0 | 0 |
| 28 | 31  | 1 | 0 | 0 | 0 | 0 |
| 31 | 32  | 1 | 0 | 0 | 0 | 0 |
| 31 | 48  | 2 | 0 | 0 | 0 | 0 |
| 32 | 33  | 1 | 0 | 0 | 0 | 0 |
| 33 | 34  | 1 | 0 | 0 | 0 | 0 |
| 33 | 35  | 1 | 0 | 0 | 0 | 0 |
| 33 | 36  | 1 | 0 | 0 | 0 | 0 |
| 36 | 37  | 1 | 0 | 0 | 0 | 0 |
| 36 | 50  | 1 | 0 | 0 | 0 | 0 |
| 36 | 53  | 1 | 0 | 0 | 0 | 0 |
| 37 | 38  | 1 | 0 | 0 | 0 | 0 |
| 37 | 39  | 1 | 0 | 0 | 0 | 0 |
| 37 | 40  | 1 | 0 | 0 | 0 | 0 |
| 40 | 41  | 1 | 0 | 0 | 0 | 0 |
| 41 | 42  | 1 | 0 | 0 | 0 | 0 |
| 41 | 49  | 2 | 0 | 0 | 0 | 0 |
| 42 | 43  | 1 | 0 | 0 | 0 | 0 |
| 42 | 44  | 1 | 0 | 0 | 0 | 0 |
| 42 | 45  | 1 | 0 | 0 | 0 | 0 |
| 45 | 46  | 1 | 0 | 0 | 0 | 0 |
| 45 | 47  | 1 | 0 | 0 | 0 | 0 |
| 45 | 74  | 1 | 0 | 0 | 0 | 0 |
| 50 | 51  | 1 | 0 | 0 | 0 | 0 |
| 50 | 52  | 1 | 0 | 0 | 0 | 0 |
| 50 | 56  | 1 | 0 | 0 | 0 | 0 |
| 53 | 54  | 1 | 0 | 0 | 0 | 0 |
| 53 | 55  | 1 | 0 | 0 | 0 | 0 |
| 53 | 60  | 1 | 0 | 0 | 0 | 0 |
| 56 | 57  | 1 | 0 | 0 | 0 | 0 |
| 56 | 58  | 1 | 0 | 0 | 0 | 0 |
| 56 | 59  | 1 | 0 | 0 | 0 | 0 |
| 60 | 61  | 1 | 0 | 0 | 0 | 0 |
| 61 | 62  | 2 | 0 | 0 | 0 | 0 |
| 63 | 64  | 1 | 0 | 0 | 0 | 0 |
| 63 | 65  | 1 | 0 | 0 | 0 | 0 |
| 65 | 66  | 1 | 0 | 0 | 0 | 0 |
| 65 | 67  | 1 | 0 | 0 | 0 | 0 |
| 65 | 68  | 1 | 0 | 0 | 0 | 0 |
| 68 | 69  | 1 | 0 | 0 | 0 | 0 |
| 68 | 70  | 1 | 0 | 0 | 0 | 0 |
| 68 | 71  | 1 | 0 | 0 | 0 | 0 |
| 71 | 72  | 1 | 0 | 0 | 0 | 0 |
| 71 | 73  | 1 | 0 | 0 | 0 | 0 |
| 71 | 74  | 1 | 0 | 0 | 0 | 0 |
| 74 | 86  | 1 | 0 | 0 | 0 | 0 |
| 75 | 76  | 1 | 0 | 0 | 0 | 0 |
| 75 | 84  | 2 | 0 | 0 | 0 | 0 |
| 75 | 122 | 1 | 0 | 0 | 0 | 0 |
| 76 | 77  | 1 | 0 | 0 | 0 | 0 |
| 76 | 78  | 2 | 0 | 0 | 0 | 0 |
| 78 | 79  | 1 | 0 | 0 | 0 | 0 |

|     |     |   |   |   |   |   |
|-----|-----|---|---|---|---|---|
| 78  | 80  | 1 | 0 | 0 | 0 | 0 |
| 80  | 81  | 1 | 0 | 0 | 0 | 0 |
| 80  | 82  | 2 | 0 | 0 | 0 | 0 |
| 82  | 83  | 1 | 0 | 0 | 0 | 0 |
| 82  | 84  | 1 | 0 | 0 | 0 | 0 |
| 84  | 85  | 1 | 0 | 0 | 0 | 0 |
| 86  | 87  | 1 | 0 | 0 | 0 | 0 |
| 86  | 88  | 1 | 0 | 0 | 0 | 0 |
| 86  | 89  | 1 | 0 | 0 | 0 | 0 |
| 89  | 90  | 1 | 0 | 0 | 0 | 0 |
| 89  | 91  | 1 | 0 | 0 | 0 | 0 |
| 89  | 92  | 1 | 0 | 0 | 0 | 0 |
| 92  | 93  | 1 | 0 | 0 | 0 | 0 |
| 92  | 109 | 2 | 0 | 0 | 0 | 0 |
| 93  | 94  | 1 | 0 | 0 | 0 | 0 |
| 94  | 95  | 1 | 0 | 0 | 0 | 0 |
| 94  | 96  | 1 | 0 | 0 | 0 | 0 |
| 94  | 97  | 1 | 0 | 0 | 0 | 0 |
| 97  | 98  | 1 | 0 | 0 | 0 | 0 |
| 97  | 111 | 1 | 0 | 0 | 0 | 0 |
| 97  | 114 | 1 | 0 | 0 | 0 | 0 |
| 98  | 99  | 1 | 0 | 0 | 0 | 0 |
| 98  | 100 | 1 | 0 | 0 | 0 | 0 |
| 98  | 101 | 1 | 0 | 0 | 0 | 0 |
| 101 | 102 | 1 | 0 | 0 | 0 | 0 |
| 102 | 103 | 1 | 0 | 0 | 0 | 0 |
| 102 | 110 | 2 | 0 | 0 | 0 | 0 |
| 103 | 104 | 1 | 0 | 0 | 0 | 0 |
| 103 | 105 | 1 | 0 | 0 | 0 | 0 |
| 103 | 106 | 1 | 0 | 0 | 0 | 0 |
| 106 | 107 | 1 | 0 | 0 | 0 | 0 |
| 106 | 108 | 1 | 0 | 0 | 0 | 0 |
| 106 | 135 | 1 | 0 | 0 | 0 | 0 |
| 111 | 112 | 1 | 0 | 0 | 0 | 0 |
| 111 | 113 | 1 | 0 | 0 | 0 | 0 |
| 111 | 117 | 1 | 0 | 0 | 0 | 0 |
| 114 | 115 | 1 | 0 | 0 | 0 | 0 |
| 114 | 116 | 1 | 0 | 0 | 0 | 0 |
| 114 | 121 | 1 | 0 | 0 | 0 | 0 |
| 117 | 118 | 1 | 0 | 0 | 0 | 0 |
| 117 | 119 | 1 | 0 | 0 | 0 | 0 |
| 117 | 120 | 1 | 0 | 0 | 0 | 0 |
| 121 | 122 | 1 | 0 | 0 | 0 | 0 |
| 122 | 123 | 2 | 0 | 0 | 0 | 0 |
| 124 | 125 | 1 | 0 | 0 | 0 | 0 |
| 124 | 126 | 1 | 0 | 0 | 0 | 0 |
| 126 | 127 | 1 | 0 | 0 | 0 | 0 |
| 126 | 128 | 1 | 0 | 0 | 0 | 0 |
| 126 | 129 | 1 | 0 | 0 | 0 | 0 |
| 129 | 130 | 1 | 0 | 0 | 0 | 0 |
| 129 | 131 | 1 | 0 | 0 | 0 | 0 |
| 129 | 132 | 1 | 0 | 0 | 0 | 0 |
| 132 | 133 | 1 | 0 | 0 | 0 | 0 |
| 132 | 134 | 1 | 0 | 0 | 0 | 0 |
| 132 | 135 | 1 | 0 | 0 | 0 | 0 |
| 135 | 147 | 1 | 0 | 0 | 0 | 0 |
| 136 | 137 | 1 | 0 | 0 | 0 | 0 |
| 136 | 145 | 2 | 0 | 0 | 0 | 0 |
| 136 | 183 | 1 | 0 | 0 | 0 | 0 |
| 137 | 138 | 1 | 0 | 0 | 0 | 0 |
| 137 | 139 | 2 | 0 | 0 | 0 | 0 |
| 139 | 140 | 1 | 0 | 0 | 0 | 0 |
| 139 | 141 | 1 | 0 | 0 | 0 | 0 |
| 141 | 142 | 1 | 0 | 0 | 0 | 0 |
| 141 | 143 | 2 | 0 | 0 | 0 | 0 |
| 143 | 144 | 1 | 0 | 0 | 0 | 0 |
| 143 | 145 | 1 | 0 | 0 | 0 | 0 |
| 145 | 146 | 1 | 0 | 0 | 0 | 0 |
| 147 | 148 | 1 | 0 | 0 | 0 | 0 |
| 147 | 149 | 1 | 0 | 0 | 0 | 0 |
| 147 | 150 | 1 | 0 | 0 | 0 | 0 |
| 150 | 151 | 1 | 0 | 0 | 0 | 0 |
| 150 | 152 | 1 | 0 | 0 | 0 | 0 |
| 150 | 153 | 1 | 0 | 0 | 0 | 0 |
| 153 | 154 | 1 | 0 | 0 | 0 | 0 |
| 153 | 170 | 2 | 0 | 0 | 0 | 0 |
| 154 | 155 | 1 | 0 | 0 | 0 | 0 |
| 155 | 156 | 1 | 0 | 0 | 0 | 0 |
| 155 | 157 | 1 | 0 | 0 | 0 | 0 |
| 155 | 158 | 1 | 0 | 0 | 0 | 0 |
| 158 | 159 | 1 | 0 | 0 | 0 | 0 |

|        |   |   |   |   |   |
|--------|---|---|---|---|---|
| 158172 | 1 | 0 | 0 | 0 | 0 |
| 158175 | 1 | 0 | 0 | 0 | 0 |
| 159160 | 1 | 0 | 0 | 0 | 0 |
| 159161 | 1 | 0 | 0 | 0 | 0 |
| 159162 | 1 | 0 | 0 | 0 | 0 |
| 162163 | 1 | 0 | 0 | 0 | 0 |
| 163164 | 1 | 0 | 0 | 0 | 0 |
| 163171 | 2 | 0 | 0 | 0 | 0 |
| 164165 | 1 | 0 | 0 | 0 | 0 |
| 164166 | 1 | 0 | 0 | 0 | 0 |
| 164167 | 1 | 0 | 0 | 0 | 0 |
| 167168 | 1 | 0 | 0 | 0 | 0 |
| 167169 | 1 | 0 | 0 | 0 | 0 |
| 167196 | 1 | 0 | 0 | 0 | 0 |
| 172173 | 1 | 0 | 0 | 0 | 0 |
| 172174 | 1 | 0 | 0 | 0 | 0 |
| 172178 | 1 | 0 | 0 | 0 | 0 |
| 175176 | 1 | 0 | 0 | 0 | 0 |
| 175177 | 1 | 0 | 0 | 0 | 0 |
| 175182 | 1 | 0 | 0 | 0 | 0 |
| 178179 | 1 | 0 | 0 | 0 | 0 |
| 178180 | 1 | 0 | 0 | 0 | 0 |
| 178181 | 1 | 0 | 0 | 0 | 0 |
| 182183 | 1 | 0 | 0 | 0 | 0 |
| 183184 | 2 | 0 | 0 | 0 | 0 |
| 185186 | 1 | 0 | 0 | 0 | 0 |
| 185187 | 1 | 0 | 0 | 0 | 0 |
| 187188 | 1 | 0 | 0 | 0 | 0 |
| 187189 | 1 | 0 | 0 | 0 | 0 |
| 187190 | 1 | 0 | 0 | 0 | 0 |
| 190191 | 1 | 0 | 0 | 0 | 0 |
| 190192 | 1 | 0 | 0 | 0 | 0 |
| 190193 | 1 | 0 | 0 | 0 | 0 |
| 193194 | 1 | 0 | 0 | 0 | 0 |
| 193195 | 1 | 0 | 0 | 0 | 0 |
| 193196 | 1 | 0 | 0 | 0 | 0 |
| 196208 | 1 | 0 | 0 | 0 | 0 |
| 197198 | 1 | 0 | 0 | 0 | 0 |
| 197206 | 2 | 0 | 0 | 0 | 0 |
| 197244 | 1 | 0 | 0 | 0 | 0 |
| 198199 | 1 | 0 | 0 | 0 | 0 |
| 198200 | 2 | 0 | 0 | 0 | 0 |
| 200201 | 1 | 0 | 0 | 0 | 0 |
| 200202 | 1 | 0 | 0 | 0 | 0 |
| 202203 | 1 | 0 | 0 | 0 | 0 |
| 202204 | 2 | 0 | 0 | 0 | 0 |
| 204205 | 1 | 0 | 0 | 0 | 0 |
| 204206 | 1 | 0 | 0 | 0 | 0 |
| 206207 | 1 | 0 | 0 | 0 | 0 |
| 208209 | 1 | 0 | 0 | 0 | 0 |
| 208210 | 1 | 0 | 0 | 0 | 0 |
| 208211 | 1 | 0 | 0 | 0 | 0 |
| 211212 | 1 | 0 | 0 | 0 | 0 |
| 211213 | 1 | 0 | 0 | 0 | 0 |
| 211214 | 1 | 0 | 0 | 0 | 0 |
| 214215 | 1 | 0 | 0 | 0 | 0 |
| 214231 | 2 | 0 | 0 | 0 | 0 |
| 215216 | 1 | 0 | 0 | 0 | 0 |
| 216217 | 1 | 0 | 0 | 0 | 0 |
| 216218 | 1 | 0 | 0 | 0 | 0 |
| 216219 | 1 | 0 | 0 | 0 | 0 |
| 219220 | 1 | 0 | 0 | 0 | 0 |
| 219233 | 1 | 0 | 0 | 0 | 0 |
| 219236 | 1 | 0 | 0 | 0 | 0 |
| 220221 | 1 | 0 | 0 | 0 | 0 |
| 220222 | 1 | 0 | 0 | 0 | 0 |
| 220223 | 1 | 0 | 0 | 0 | 0 |
| 223224 | 1 | 0 | 0 | 0 | 0 |
| 224225 | 1 | 0 | 0 | 0 | 0 |
| 224232 | 2 | 0 | 0 | 0 | 0 |
| 225226 | 1 | 0 | 0 | 0 | 0 |
| 225227 | 1 | 0 | 0 | 0 | 0 |
| 225228 | 1 | 0 | 0 | 0 | 0 |
| 228229 | 1 | 0 | 0 | 0 | 0 |
| 228230 | 1 | 0 | 0 | 0 | 0 |
| 228257 | 1 | 0 | 0 | 0 | 0 |
| 233234 | 1 | 0 | 0 | 0 | 0 |
| 233235 | 1 | 0 | 0 | 0 | 0 |
| 233239 | 1 | 0 | 0 | 0 | 0 |
| 236237 | 1 | 0 | 0 | 0 | 0 |
| 236238 | 1 | 0 | 0 | 0 | 0 |

|        |   |   |   |   |   |
|--------|---|---|---|---|---|
| 236243 | 1 | 0 | 0 | 0 | 0 |
| 239240 | 1 | 0 | 0 | 0 | 0 |
| 239241 | 1 | 0 | 0 | 0 | 0 |
| 239242 | 1 | 0 | 0 | 0 | 0 |
| 243244 | 1 | 0 | 0 | 0 | 0 |
| 244245 | 2 | 0 | 0 | 0 | 0 |
| 246247 | 1 | 0 | 0 | 0 | 0 |
| 246248 | 1 | 0 | 0 | 0 | 0 |
| 248249 | 1 | 0 | 0 | 0 | 0 |
| 248250 | 1 | 0 | 0 | 0 | 0 |
| 248251 | 1 | 0 | 0 | 0 | 0 |
| 251252 | 1 | 0 | 0 | 0 | 0 |
| 251253 | 1 | 0 | 0 | 0 | 0 |
| 251254 | 1 | 0 | 0 | 0 | 0 |
| 254255 | 1 | 0 | 0 | 0 | 0 |
| 254256 | 1 | 0 | 0 | 0 | 0 |
| 254257 | 1 | 0 | 0 | 0 | 0 |
| 257269 | 1 | 0 | 0 | 0 | 0 |
| 258259 | 1 | 0 | 0 | 0 | 0 |
| 258267 | 2 | 0 | 0 | 0 | 0 |
| 258305 | 1 | 0 | 0 | 0 | 0 |
| 259260 | 1 | 0 | 0 | 0 | 0 |
| 259261 | 2 | 0 | 0 | 0 | 0 |
| 261262 | 1 | 0 | 0 | 0 | 0 |
| 261263 | 1 | 0 | 0 | 0 | 0 |
| 263264 | 1 | 0 | 0 | 0 | 0 |
| 263265 | 2 | 0 | 0 | 0 | 0 |
| 265266 | 1 | 0 | 0 | 0 | 0 |
| 265267 | 1 | 0 | 0 | 0 | 0 |
| 267268 | 1 | 0 | 0 | 0 | 0 |
| 269270 | 1 | 0 | 0 | 0 | 0 |
| 269271 | 1 | 0 | 0 | 0 | 0 |
| 269272 | 1 | 0 | 0 | 0 | 0 |
| 272273 | 1 | 0 | 0 | 0 | 0 |
| 272274 | 1 | 0 | 0 | 0 | 0 |
| 272275 | 1 | 0 | 0 | 0 | 0 |
| 275276 | 1 | 0 | 0 | 0 | 0 |
| 275292 | 2 | 0 | 0 | 0 | 0 |
| 276277 | 1 | 0 | 0 | 0 | 0 |
| 277278 | 1 | 0 | 0 | 0 | 0 |
| 277279 | 1 | 0 | 0 | 0 | 0 |
| 277280 | 1 | 0 | 0 | 0 | 0 |
| 280281 | 1 | 0 | 0 | 0 | 0 |
| 280294 | 1 | 0 | 0 | 0 | 0 |
| 280297 | 1 | 0 | 0 | 0 | 0 |
| 281282 | 1 | 0 | 0 | 0 | 0 |
| 281283 | 1 | 0 | 0 | 0 | 0 |
| 281284 | 1 | 0 | 0 | 0 | 0 |
| 284285 | 1 | 0 | 0 | 0 | 0 |
| 285286 | 1 | 0 | 0 | 0 | 0 |
| 285293 | 2 | 0 | 0 | 0 | 0 |
| 286287 | 1 | 0 | 0 | 0 | 0 |
| 286288 | 1 | 0 | 0 | 0 | 0 |
| 286289 | 1 | 0 | 0 | 0 | 0 |
| 289290 | 1 | 0 | 0 | 0 | 0 |
| 289291 | 1 | 0 | 0 | 0 | 0 |
| 289318 | 1 | 0 | 0 | 0 | 0 |
| 294295 | 1 | 0 | 0 | 0 | 0 |
| 294296 | 1 | 0 | 0 | 0 | 0 |
| 294300 | 1 | 0 | 0 | 0 | 0 |
| 297298 | 1 | 0 | 0 | 0 | 0 |
| 297299 | 1 | 0 | 0 | 0 | 0 |
| 297304 | 1 | 0 | 0 | 0 | 0 |
| 300301 | 1 | 0 | 0 | 0 | 0 |
| 300302 | 1 | 0 | 0 | 0 | 0 |
| 300303 | 1 | 0 | 0 | 0 | 0 |
| 304305 | 1 | 0 | 0 | 0 | 0 |
| 305306 | 2 | 0 | 0 | 0 | 0 |
| 307308 | 1 | 0 | 0 | 0 | 0 |
| 307309 | 1 | 0 | 0 | 0 | 0 |
| 309310 | 1 | 0 | 0 | 0 | 0 |
| 309311 | 1 | 0 | 0 | 0 | 0 |
| 309312 | 1 | 0 | 0 | 0 | 0 |
| 312313 | 1 | 0 | 0 | 0 | 0 |
| 312314 | 1 | 0 | 0 | 0 | 0 |
| 312315 | 1 | 0 | 0 | 0 | 0 |
| 315316 | 1 | 0 | 0 | 0 | 0 |
| 315317 | 1 | 0 | 0 | 0 | 0 |
| 315318 | 1 | 0 | 0 | 0 | 0 |
| 318319 | 1 | 0 | 0 | 0 | 0 |

M END











|         |         |          |   |   |   |   |   |   |   |   |   |   |   |   |   |   |
|---------|---------|----------|---|---|---|---|---|---|---|---|---|---|---|---|---|---|
| 45.8590 | 0.4180  | -18.1690 | C | 0 | 0 | 3 | 0 | 0 | 0 | 0 | 0 | 0 | 0 | 0 | 0 | 0 |
| 45.7460 | 1.3390  | -18.7540 | H | 0 | 0 | 0 | 0 | 0 | 0 | 0 | 0 | 0 | 0 | 0 | 0 | 0 |
| 45.6590 | 0.6970  | -16.6690 | C | 0 | 0 | 0 | 0 | 0 | 0 | 0 | 0 | 0 | 0 | 0 | 0 | 0 |
| 44.6140 | 0.9650  | -16.4810 | H | 0 | 0 | 0 | 0 | 0 | 0 | 0 | 0 | 0 | 0 | 0 | 0 | 0 |
| 45.9010 | -0.2070 | -16.0980 | H | 0 | 0 | 0 | 0 | 0 | 0 | 0 | 0 | 0 | 0 | 0 | 0 | 0 |
| 46.5360 | 1.7980  | -16.2520 | N | 0 | 0 | 3 | 0 | 0 | 0 | 0 | 0 | 0 | 0 | 0 | 0 | 0 |
| 47.4970 | 1.5580  | -16.5090 | H | 0 | 0 | 0 | 0 | 0 | 0 | 0 | 0 | 0 | 0 | 0 | 0 | 0 |
| 47.1950 | -0.0580 | -18.3960 | O | 0 | 0 | 0 | 0 | 0 | 0 | 0 | 0 | 0 | 0 | 0 | 0 | 0 |
| 47.1770 | -0.3930 | -19.3160 | H | 0 | 0 | 0 | 0 | 0 | 0 | 0 | 0 | 0 | 0 | 0 | 0 | 0 |
| 1       | 2       | 1        | 0 | 0 | 0 | 0 |   |   |   |   |   |   |   |   |   |   |
| 1       | 3       | 1        | 0 | 0 | 0 | 0 |   |   |   |   |   |   |   |   |   |   |
| 3       | 4       | 1        | 0 | 0 | 0 | 0 |   |   |   |   |   |   |   |   |   |   |
| 3       | 5       | 1        | 0 | 0 | 0 | 0 |   |   |   |   |   |   |   |   |   |   |
| 3       | 6       | 1        | 0 | 0 | 0 | 0 |   |   |   |   |   |   |   |   |   |   |
| 6       | 7       | 1        | 0 | 0 | 0 | 0 |   |   |   |   |   |   |   |   |   |   |
| 6       | 8       | 1        | 0 | 0 | 0 | 0 |   |   |   |   |   |   |   |   |   |   |
| 6       | 13      | 1        | 0 | 0 | 0 | 0 |   |   |   |   |   |   |   |   |   |   |
| 8       | 9       | 1        | 0 | 0 | 0 | 0 |   |   |   |   |   |   |   |   |   |   |
| 8       | 10      | 1        | 0 | 0 | 0 | 0 |   |   |   |   |   |   |   |   |   |   |
| 8       | 11      | 1        | 0 | 0 | 0 | 0 |   |   |   |   |   |   |   |   |   |   |
| 11      | 12      | 1        | 0 | 0 | 0 | 0 |   |   |   |   |   |   |   |   |   |   |
| 11      | 26      | 1        | 0 | 0 | 0 | 0 |   |   |   |   |   |   |   |   |   |   |
| 13      | 14      | 1        | 0 | 0 | 0 | 0 |   |   |   |   |   |   |   |   |   |   |
| 15      | 16      | 1        | 0 | 0 | 0 | 0 |   |   |   |   |   |   |   |   |   |   |
| 15      | 24      | 2        | 0 | 0 | 0 | 0 |   |   |   |   |   |   |   |   |   |   |
| 15      | 62      | 1        | 0 | 0 | 0 | 0 |   |   |   |   |   |   |   |   |   |   |
| 16      | 17      | 1        | 0 | 0 | 0 | 0 |   |   |   |   |   |   |   |   |   |   |
| 16      | 18      | 2        | 0 | 0 | 0 | 0 |   |   |   |   |   |   |   |   |   |   |
| 18      | 19      | 1        | 0 | 0 | 0 | 0 |   |   |   |   |   |   |   |   |   |   |
| 18      | 20      | 1        | 0 | 0 | 0 | 0 |   |   |   |   |   |   |   |   |   |   |
| 20      | 21      | 1        | 0 | 0 | 0 | 0 |   |   |   |   |   |   |   |   |   |   |
| 20      | 22      | 2        | 0 | 0 | 0 | 0 |   |   |   |   |   |   |   |   |   |   |
| 22      | 23      | 1        | 0 | 0 | 0 | 0 |   |   |   |   |   |   |   |   |   |   |
| 22      | 24      | 1        | 0 | 0 | 0 | 0 |   |   |   |   |   |   |   |   |   |   |
| 24      | 25      | 1        | 0 | 0 | 0 | 0 |   |   |   |   |   |   |   |   |   |   |
| 26      | 27      | 1        | 0 | 0 | 0 | 0 |   |   |   |   |   |   |   |   |   |   |
| 26      | 28      | 1        | 0 | 0 | 0 | 0 |   |   |   |   |   |   |   |   |   |   |
| 26      | 29      | 1        | 0 | 0 | 0 | 0 |   |   |   |   |   |   |   |   |   |   |
| 29      | 30      | 1        | 0 | 0 | 0 | 0 |   |   |   |   |   |   |   |   |   |   |
| 29      | 31      | 1        | 0 | 0 | 0 | 0 |   |   |   |   |   |   |   |   |   |   |
| 29      | 32      | 1        | 0 | 0 | 0 | 0 |   |   |   |   |   |   |   |   |   |   |
| 32      | 33      | 1        | 0 | 0 | 0 | 0 |   |   |   |   |   |   |   |   |   |   |
| 32      | 49      | 2        | 0 | 0 | 0 | 0 |   |   |   |   |   |   |   |   |   |   |
| 33      | 34      | 1        | 0 | 0 | 0 | 0 |   |   |   |   |   |   |   |   |   |   |
| 34      | 35      | 1        | 0 | 0 | 0 | 0 |   |   |   |   |   |   |   |   |   |   |
| 34      | 36      | 1        | 0 | 0 | 0 | 0 |   |   |   |   |   |   |   |   |   |   |
| 34      | 37      | 1        | 0 | 0 | 0 | 0 |   |   |   |   |   |   |   |   |   |   |
| 37      | 38      | 1        | 0 | 0 | 0 | 0 |   |   |   |   |   |   |   |   |   |   |
| 37      | 51      | 1        | 0 | 0 | 0 | 0 |   |   |   |   |   |   |   |   |   |   |
| 37      | 54      | 1        | 0 | 0 | 0 | 0 |   |   |   |   |   |   |   |   |   |   |
| 38      | 39      | 1        | 0 | 0 | 0 | 0 |   |   |   |   |   |   |   |   |   |   |
| 38      | 40      | 1        | 0 | 0 | 0 | 0 |   |   |   |   |   |   |   |   |   |   |
| 38      | 41      | 1        | 0 | 0 | 0 | 0 |   |   |   |   |   |   |   |   |   |   |
| 41      | 42      | 1        | 0 | 0 | 0 | 0 |   |   |   |   |   |   |   |   |   |   |
| 42      | 43      | 1        | 0 | 0 | 0 | 0 |   |   |   |   |   |   |   |   |   |   |
| 42      | 50      | 2        | 0 | 0 | 0 | 0 |   |   |   |   |   |   |   |   |   |   |
| 43      | 44      | 1        | 0 | 0 | 0 | 0 |   |   |   |   |   |   |   |   |   |   |
| 43      | 45      | 1        | 0 | 0 | 0 | 0 |   |   |   |   |   |   |   |   |   |   |
| 43      | 46      | 1        | 0 | 0 | 0 | 0 |   |   |   |   |   |   |   |   |   |   |
| 46      | 47      | 1        | 0 | 0 | 0 | 0 |   |   |   |   |   |   |   |   |   |   |
| 46      | 48      | 1        | 0 | 0 | 0 | 0 |   |   |   |   |   |   |   |   |   |   |
| 46      | 74      | 1        | 0 | 0 | 0 | 0 |   |   |   |   |   |   |   |   |   |   |
| 51      | 52      | 1        | 0 | 0 | 0 | 0 |   |   |   |   |   |   |   |   |   |   |
| 51      | 53      | 1        | 0 | 0 | 0 | 0 |   |   |   |   |   |   |   |   |   |   |
| 51      | 57      | 1        | 0 | 0 | 0 | 0 |   |   |   |   |   |   |   |   |   |   |
| 54      | 55      | 1        | 0 | 0 | 0 | 0 |   |   |   |   |   |   |   |   |   |   |
| 54      | 56      | 1        | 0 | 0 | 0 | 0 |   |   |   |   |   |   |   |   |   |   |
| 54      | 61      | 1        | 0 | 0 | 0 | 0 |   |   |   |   |   |   |   |   |   |   |
| 57      | 58      | 1        | 0 | 0 | 0 | 0 |   |   |   |   |   |   |   |   |   |   |
| 57      | 59      | 1        | 0 | 0 | 0 | 0 |   |   |   |   |   |   |   |   |   |   |
| 57      | 60      | 1        | 0 | 0 | 0 | 0 |   |   |   |   |   |   |   |   |   |   |
| 61      | 62      | 1        | 0 | 0 | 0 | 0 |   |   |   |   |   |   |   |   |   |   |
| 62      | 63      | 2        | 0 | 0 | 0 | 0 |   |   |   |   |   |   |   |   |   |   |
| 64      | 65      | 1        | 0 | 0 | 0 | 0 |   |   |   |   |   |   |   |   |   |   |
| 64      | 66      | 1        | 0 | 0 | 0 | 0 |   |   |   |   |   |   |   |   |   |   |
| 66      | 67      | 1        | 0 | 0 | 0 | 0 |   |   |   |   |   |   |   |   |   |   |
| 66      | 68      | 1        | 0 | 0 | 0 | 0 |   |   |   |   |   |   |   |   |   |   |
| 66      | 69      | 1        | 0 | 0 | 0 | 0 |   |   |   |   |   |   |   |   |   |   |
| 69      | 70      | 1        | 0 | 0 | 0 | 0 |   |   |   |   |   |   |   |   |   |   |
| 69      | 71      | 1        | 0 | 0 | 0 | 0 |   |   |   |   |   |   |   |   |   |   |
| 69      | 75      | 1        | 0 | 0 | 0 | 0 |   |   |   |   |   |   |   |   |   |   |

|        |    |   |   |   |   |   |
|--------|----|---|---|---|---|---|
| 71     | 72 | 1 | 0 | 0 | 0 | 0 |
| 71     | 73 | 1 | 0 | 0 | 0 | 0 |
| 71     | 74 | 1 | 0 | 0 | 0 | 0 |
| 74     | 88 | 1 | 0 | 0 | 0 | 0 |
| 75     | 76 | 1 | 0 | 0 | 0 | 0 |
| 77     | 78 | 1 | 0 | 0 | 0 | 0 |
| 77     | 86 | 2 | 0 | 0 | 0 | 0 |
| 77124  |    | 1 | 0 | 0 | 0 | 0 |
| 78     | 79 | 1 | 0 | 0 | 0 | 0 |
| 78     | 80 | 2 | 0 | 0 | 0 | 0 |
| 80     | 81 | 1 | 0 | 0 | 0 | 0 |
| 80     | 82 | 1 | 0 | 0 | 0 | 0 |
| 82     | 83 | 1 | 0 | 0 | 0 | 0 |
| 82     | 84 | 2 | 0 | 0 | 0 | 0 |
| 84     | 85 | 1 | 0 | 0 | 0 | 0 |
| 84     | 86 | 1 | 0 | 0 | 0 | 0 |
| 86     | 87 | 1 | 0 | 0 | 0 | 0 |
| 88     | 89 | 1 | 0 | 0 | 0 | 0 |
| 88     | 90 | 1 | 0 | 0 | 0 | 0 |
| 88     | 91 | 1 | 0 | 0 | 0 | 0 |
| 91     | 92 | 1 | 0 | 0 | 0 | 0 |
| 91     | 93 | 1 | 0 | 0 | 0 | 0 |
| 91     | 94 | 1 | 0 | 0 | 0 | 0 |
| 94     | 95 | 1 | 0 | 0 | 0 | 0 |
| 94111  |    | 2 | 0 | 0 | 0 | 0 |
| 95     | 96 | 1 | 0 | 0 | 0 | 0 |
| 96     | 97 | 1 | 0 | 0 | 0 | 0 |
| 96     | 98 | 1 | 0 | 0 | 0 | 0 |
| 96     | 99 | 1 | 0 | 0 | 0 | 0 |
| 99100  |    | 1 | 0 | 0 | 0 | 0 |
| 99113  |    | 1 | 0 | 0 | 0 | 0 |
| 99116  |    | 1 | 0 | 0 | 0 | 0 |
| 100101 |    | 1 | 0 | 0 | 0 | 0 |
| 100102 |    | 1 | 0 | 0 | 0 | 0 |
| 100103 |    | 1 | 0 | 0 | 0 | 0 |
| 103104 |    | 1 | 0 | 0 | 0 | 0 |
| 104105 |    | 1 | 0 | 0 | 0 | 0 |
| 104112 |    | 2 | 0 | 0 | 0 | 0 |
| 105106 |    | 1 | 0 | 0 | 0 | 0 |
| 105107 |    | 1 | 0 | 0 | 0 | 0 |
| 105108 |    | 1 | 0 | 0 | 0 | 0 |
| 108109 |    | 1 | 0 | 0 | 0 | 0 |
| 108110 |    | 1 | 0 | 0 | 0 | 0 |
| 108136 |    | 1 | 0 | 0 | 0 | 0 |
| 113114 |    | 1 | 0 | 0 | 0 | 0 |
| 113115 |    | 1 | 0 | 0 | 0 | 0 |
| 113119 |    | 1 | 0 | 0 | 0 | 0 |
| 116117 |    | 1 | 0 | 0 | 0 | 0 |
| 116118 |    | 1 | 0 | 0 | 0 | 0 |
| 116123 |    | 1 | 0 | 0 | 0 | 0 |
| 119120 |    | 1 | 0 | 0 | 0 | 0 |
| 119121 |    | 1 | 0 | 0 | 0 | 0 |
| 119122 |    | 1 | 0 | 0 | 0 | 0 |
| 123124 |    | 1 | 0 | 0 | 0 | 0 |
| 124125 |    | 2 | 0 | 0 | 0 | 0 |
| 126127 |    | 1 | 0 | 0 | 0 | 0 |
| 126128 |    | 1 | 0 | 0 | 0 | 0 |
| 128129 |    | 1 | 0 | 0 | 0 | 0 |
| 128130 |    | 1 | 0 | 0 | 0 | 0 |
| 128131 |    | 1 | 0 | 0 | 0 | 0 |
| 131132 |    | 1 | 0 | 0 | 0 | 0 |
| 131133 |    | 1 | 0 | 0 | 0 | 0 |
| 131137 |    | 1 | 0 | 0 | 0 | 0 |
| 133134 |    | 1 | 0 | 0 | 0 | 0 |
| 133135 |    | 1 | 0 | 0 | 0 | 0 |
| 133136 |    | 1 | 0 | 0 | 0 | 0 |
| 136150 |    | 1 | 0 | 0 | 0 | 0 |
| 137138 |    | 1 | 0 | 0 | 0 | 0 |
| 139140 |    | 1 | 0 | 0 | 0 | 0 |
| 139148 |    | 2 | 0 | 0 | 0 | 0 |
| 139186 |    | 1 | 0 | 0 | 0 | 0 |
| 140141 |    | 1 | 0 | 0 | 0 | 0 |
| 140142 |    | 2 | 0 | 0 | 0 | 0 |
| 142143 |    | 1 | 0 | 0 | 0 | 0 |
| 142144 |    | 1 | 0 | 0 | 0 | 0 |
| 144145 |    | 1 | 0 | 0 | 0 | 0 |
| 144146 |    | 2 | 0 | 0 | 0 | 0 |
| 146147 |    | 1 | 0 | 0 | 0 | 0 |
| 146148 |    | 1 | 0 | 0 | 0 | 0 |
| 148149 |    | 1 | 0 | 0 | 0 | 0 |
| 150151 |    | 1 | 0 | 0 | 0 | 0 |

|        |   |   |   |   |   |
|--------|---|---|---|---|---|
| 150152 | 1 | 0 | 0 | 0 | 0 |
| 150153 | 1 | 0 | 0 | 0 | 0 |
| 153154 | 1 | 0 | 0 | 0 | 0 |
| 153155 | 1 | 0 | 0 | 0 | 0 |
| 153156 | 1 | 0 | 0 | 0 | 0 |
| 156157 | 1 | 0 | 0 | 0 | 0 |
| 156173 | 2 | 0 | 0 | 0 | 0 |
| 157158 | 1 | 0 | 0 | 0 | 0 |
| 158159 | 1 | 0 | 0 | 0 | 0 |
| 158160 | 1 | 0 | 0 | 0 | 0 |
| 158161 | 1 | 0 | 0 | 0 | 0 |
| 161162 | 1 | 0 | 0 | 0 | 0 |
| 161175 | 1 | 0 | 0 | 0 | 0 |
| 161178 | 1 | 0 | 0 | 0 | 0 |
| 162163 | 1 | 0 | 0 | 0 | 0 |
| 162164 | 1 | 0 | 0 | 0 | 0 |
| 162165 | 1 | 0 | 0 | 0 | 0 |
| 165166 | 1 | 0 | 0 | 0 | 0 |
| 166167 | 1 | 0 | 0 | 0 | 0 |
| 166174 | 2 | 0 | 0 | 0 | 0 |
| 167168 | 1 | 0 | 0 | 0 | 0 |
| 167169 | 1 | 0 | 0 | 0 | 0 |
| 167170 | 1 | 0 | 0 | 0 | 0 |
| 170171 | 1 | 0 | 0 | 0 | 0 |
| 170172 | 1 | 0 | 0 | 0 | 0 |
| 170198 | 1 | 0 | 0 | 0 | 0 |
| 175176 | 1 | 0 | 0 | 0 | 0 |
| 175177 | 1 | 0 | 0 | 0 | 0 |
| 175181 | 1 | 0 | 0 | 0 | 0 |
| 178179 | 1 | 0 | 0 | 0 | 0 |
| 178180 | 1 | 0 | 0 | 0 | 0 |
| 178185 | 1 | 0 | 0 | 0 | 0 |
| 181182 | 1 | 0 | 0 | 0 | 0 |
| 181183 | 1 | 0 | 0 | 0 | 0 |
| 181184 | 1 | 0 | 0 | 0 | 0 |
| 185186 | 1 | 0 | 0 | 0 | 0 |
| 186187 | 2 | 0 | 0 | 0 | 0 |
| 188189 | 1 | 0 | 0 | 0 | 0 |
| 188190 | 1 | 0 | 0 | 0 | 0 |
| 190191 | 1 | 0 | 0 | 0 | 0 |
| 190192 | 1 | 0 | 0 | 0 | 0 |
| 190193 | 1 | 0 | 0 | 0 | 0 |
| 193194 | 1 | 0 | 0 | 0 | 0 |
| 193195 | 1 | 0 | 0 | 0 | 0 |
| 193199 | 1 | 0 | 0 | 0 | 0 |
| 195196 | 1 | 0 | 0 | 0 | 0 |
| 195197 | 1 | 0 | 0 | 0 | 0 |
| 195198 | 1 | 0 | 0 | 0 | 0 |
| 198212 | 1 | 0 | 0 | 0 | 0 |
| 199200 | 1 | 0 | 0 | 0 | 0 |
| 201202 | 1 | 0 | 0 | 0 | 0 |
| 201210 | 2 | 0 | 0 | 0 | 0 |
| 201248 | 1 | 0 | 0 | 0 | 0 |
| 202203 | 1 | 0 | 0 | 0 | 0 |
| 202204 | 2 | 0 | 0 | 0 | 0 |
| 204205 | 1 | 0 | 0 | 0 | 0 |
| 204206 | 1 | 0 | 0 | 0 | 0 |
| 206207 | 1 | 0 | 0 | 0 | 0 |
| 206208 | 2 | 0 | 0 | 0 | 0 |
| 208209 | 1 | 0 | 0 | 0 | 0 |
| 208210 | 1 | 0 | 0 | 0 | 0 |
| 210211 | 1 | 0 | 0 | 0 | 0 |
| 212213 | 1 | 0 | 0 | 0 | 0 |
| 212214 | 1 | 0 | 0 | 0 | 0 |
| 212215 | 1 | 0 | 0 | 0 | 0 |
| 215216 | 1 | 0 | 0 | 0 | 0 |
| 215217 | 1 | 0 | 0 | 0 | 0 |
| 215218 | 1 | 0 | 0 | 0 | 0 |
| 218219 | 1 | 0 | 0 | 0 | 0 |
| 218235 | 2 | 0 | 0 | 0 | 0 |
| 219220 | 1 | 0 | 0 | 0 | 0 |
| 220221 | 1 | 0 | 0 | 0 | 0 |
| 220222 | 1 | 0 | 0 | 0 | 0 |
| 220223 | 1 | 0 | 0 | 0 | 0 |
| 223224 | 1 | 0 | 0 | 0 | 0 |
| 223237 | 1 | 0 | 0 | 0 | 0 |
| 223240 | 1 | 0 | 0 | 0 | 0 |
| 224225 | 1 | 0 | 0 | 0 | 0 |
| 224226 | 1 | 0 | 0 | 0 | 0 |
| 224227 | 1 | 0 | 0 | 0 | 0 |
| 227228 | 1 | 0 | 0 | 0 | 0 |

|        |   |   |   |   |   |
|--------|---|---|---|---|---|
| 228229 | 1 | 0 | 0 | 0 | 0 |
| 228236 | 2 | 0 | 0 | 0 | 0 |
| 229230 | 1 | 0 | 0 | 0 | 0 |
| 229231 | 1 | 0 | 0 | 0 | 0 |
| 229232 | 1 | 0 | 0 | 0 | 0 |
| 232233 | 1 | 0 | 0 | 0 | 0 |
| 232234 | 1 | 0 | 0 | 0 | 0 |
| 232260 | 1 | 0 | 0 | 0 | 0 |
| 237238 | 1 | 0 | 0 | 0 | 0 |
| 237239 | 1 | 0 | 0 | 0 | 0 |
| 237243 | 1 | 0 | 0 | 0 | 0 |
| 240241 | 1 | 0 | 0 | 0 | 0 |
| 240242 | 1 | 0 | 0 | 0 | 0 |
| 240247 | 1 | 0 | 0 | 0 | 0 |
| 243244 | 1 | 0 | 0 | 0 | 0 |
| 243245 | 1 | 0 | 0 | 0 | 0 |
| 243246 | 1 | 0 | 0 | 0 | 0 |
| 247248 | 1 | 0 | 0 | 0 | 0 |
| 248249 | 2 | 0 | 0 | 0 | 0 |
| 250251 | 1 | 0 | 0 | 0 | 0 |
| 250252 | 1 | 0 | 0 | 0 | 0 |
| 252253 | 1 | 0 | 0 | 0 | 0 |
| 252254 | 1 | 0 | 0 | 0 | 0 |
| 252255 | 1 | 0 | 0 | 0 | 0 |
| 255256 | 1 | 0 | 0 | 0 | 0 |
| 255257 | 1 | 0 | 0 | 0 | 0 |
| 255261 | 1 | 0 | 0 | 0 | 0 |
| 257258 | 1 | 0 | 0 | 0 | 0 |
| 257259 | 1 | 0 | 0 | 0 | 0 |
| 257260 | 1 | 0 | 0 | 0 | 0 |
| 260274 | 1 | 0 | 0 | 0 | 0 |
| 261262 | 1 | 0 | 0 | 0 | 0 |
| 263264 | 1 | 0 | 0 | 0 | 0 |
| 263272 | 2 | 0 | 0 | 0 | 0 |
| 263310 | 1 | 0 | 0 | 0 | 0 |
| 264265 | 1 | 0 | 0 | 0 | 0 |
| 264266 | 2 | 0 | 0 | 0 | 0 |
| 266267 | 1 | 0 | 0 | 0 | 0 |
| 266268 | 1 | 0 | 0 | 0 | 0 |
| 268269 | 1 | 0 | 0 | 0 | 0 |
| 268270 | 2 | 0 | 0 | 0 | 0 |
| 270271 | 1 | 0 | 0 | 0 | 0 |
| 270272 | 1 | 0 | 0 | 0 | 0 |
| 272273 | 1 | 0 | 0 | 0 | 0 |
| 274275 | 1 | 0 | 0 | 0 | 0 |
| 274276 | 1 | 0 | 0 | 0 | 0 |
| 274277 | 1 | 0 | 0 | 0 | 0 |
| 277278 | 1 | 0 | 0 | 0 | 0 |
| 277279 | 1 | 0 | 0 | 0 | 0 |
| 277280 | 1 | 0 | 0 | 0 | 0 |
| 280281 | 1 | 0 | 0 | 0 | 0 |
| 280297 | 2 | 0 | 0 | 0 | 0 |
| 281282 | 1 | 0 | 0 | 0 | 0 |
| 282283 | 1 | 0 | 0 | 0 | 0 |
| 282284 | 1 | 0 | 0 | 0 | 0 |
| 282285 | 1 | 0 | 0 | 0 | 0 |
| 285286 | 1 | 0 | 0 | 0 | 0 |
| 285299 | 1 | 0 | 0 | 0 | 0 |
| 285302 | 1 | 0 | 0 | 0 | 0 |
| 286287 | 1 | 0 | 0 | 0 | 0 |
| 286288 | 1 | 0 | 0 | 0 | 0 |
| 286289 | 1 | 0 | 0 | 0 | 0 |
| 289290 | 1 | 0 | 0 | 0 | 0 |
| 290291 | 1 | 0 | 0 | 0 | 0 |
| 290298 | 2 | 0 | 0 | 0 | 0 |
| 291292 | 1 | 0 | 0 | 0 | 0 |
| 291293 | 1 | 0 | 0 | 0 | 0 |
| 291294 | 1 | 0 | 0 | 0 | 0 |
| 294295 | 1 | 0 | 0 | 0 | 0 |
| 294296 | 1 | 0 | 0 | 0 | 0 |
| 294322 | 1 | 0 | 0 | 0 | 0 |
| 299300 | 1 | 0 | 0 | 0 | 0 |
| 299301 | 1 | 0 | 0 | 0 | 0 |
| 299305 | 1 | 0 | 0 | 0 | 0 |
| 302303 | 1 | 0 | 0 | 0 | 0 |
| 302304 | 1 | 0 | 0 | 0 | 0 |
| 302309 | 1 | 0 | 0 | 0 | 0 |
| 305306 | 1 | 0 | 0 | 0 | 0 |
| 305307 | 1 | 0 | 0 | 0 | 0 |
| 305308 | 1 | 0 | 0 | 0 | 0 |
| 309310 | 1 | 0 | 0 | 0 | 0 |



310311 2 0 0 0 0  
312313 1 0 0 0 0  
312314 1 0 0 0 0  
314315 1 0 0 0 0  
314316 1 0 0 0 0  
314317 1 0 0 0 0  
317318 1 0 0 0 0  
317319 1 0 0 0 0  
317324 1 0 0 0 0  
319320 1 0 0 0 0  
319321 1 0 0 0 0  
319322 1 0 0 0 0  
322323 1 0 0 0 0  
324325 1 0 0 0 0

M END  
> <NAME>  
AA24\_12

\$\$\$\$  
AA28\_12  
MOE2012 3D

337341 0 0 1 0 0 0 0 0999 V2000  
10.4410 -18.5340 -6.7900 O 0 0 0 0 0 0 0 0 0 0 0 0 0 0 0 0  
9.8060 -18.2480 -7.4690 H 0 0 0 0 0 0 0 0 0 0 0 0 0 0 0 0  
10.0650 -17.9010 -5.5770 C 0 0 0 0 0 0 0 0 0 0 0 0 0 0 0 0  
10.0820 -16.8170 -5.7310 H 0 0 0 0 0 0 0 0 0 0 0 0 0 0 0 0  
9.0460 -18.2090 -5.3210 H 0 0 0 0 0 0 0 0 0 0 0 0 0 0 0 0  
11.0480 -18.3130 -4.4930 C 0 0 0 0 0 0 0 0 0 0 0 0 0 0 0 0  
11.0290 -19.4030 -4.3760 H 0 0 0 0 0 0 0 0 0 0 0 0 0 0 0 0  
12.0670 -18.0630 -4.8140 H 0 0 0 0 0 0 0 0 0 0 0 0 0 0 0 0  
10.7290 -17.6300 -3.1670 C 0 0 0 0 0 0 0 0 0 0 0 0 0 0 0 0  
10.7290 -16.5420 -3.3120 H 0 0 0 0 0 0 0 0 0 0 0 0 0 0 0 0  
9.7190 -17.9110 -2.8410 H 0 0 0 0 0 0 0 0 0 0 0 0 0 0 0 0  
11.7470 -18.0090 -2.0910 C 0 0 0 0 0 0 0 0 0 0 0 0 0 0 0 0  
11.7110 -19.0900 -1.9100 H 0 0 0 0 0 0 0 0 0 0 0 0 0 0 0 0  
12.7550 -17.7530 -2.4380 H 0 0 0 0 0 0 0 0 0 0 0 0 0 0 0 0  
11.4310 -17.2830 -0.8620 N 0 0 0 3 0 0 0 0 0 0 0 0 0 0 0 0  
11.4160 -16.2750 -1.0630 H 0 0 0 0 0 0 0 0 0 0 0 0 0 0 0 0  
11.0400 -9.0050 1.7620 C 0 0 0 0 0 0 0 0 0 0 0 0 0 0 0 0  
11.2910 -9.0980 0.3880 C 0 0 0 0 0 0 0 0 0 0 0 0 0 0 0 0  
12.1700 -9.6140 0.0100 H 0 0 0 0 0 0 0 0 0 0 0 0 0 0 0 0  
10.4100 -8.5170 -0.5260 C 0 0 0 0 0 0 0 0 0 0 0 0 0 0 0 0  
10.6080 -8.5920 -1.5930 H 0 0 0 0 0 0 0 0 0 0 0 0 0 0 0 0  
9.2760 -7.8440 -0.0740 C 0 0 0 0 0 0 0 0 0 0 0 0 0 0 0 0  
8.5920 -7.3910 -0.7870 H 0 0 0 0 0 0 0 0 0 0 0 0 0 0 0 0  
9.0180 -7.7500 1.2920 C 0 0 0 0 0 0 0 0 0 0 0 0 0 0 0 0  
8.1310 -7.2270 1.6410 H 0 0 0 0 0 0 0 0 0 0 0 0 0 0 0 0  
9.8980 -8.3260 2.2100 C 0 0 0 0 0 0 0 0 0 0 0 0 0 0 0 0  
9.6870 -8.2400 3.2740 H 0 0 0 0 0 0 0 0 0 0 0 0 0 0 0 0  
12.4390 -17.5230 0.1750 C 0 0 0 0 0 0 0 0 0 0 0 0 0 0 0 0  
13.4440 -17.3220 -0.2160 H 0 0 0 0 0 0 0 0 0 0 0 0 0 0 0 0  
12.3990 -18.5730 0.4850 H 0 0 0 0 0 0 0 0 0 0 0 0 0 0 0 0  
12.1890 -16.6350 1.3950 C 0 0 0 0 0 0 0 0 0 0 0 0 0 0 0 0  
11.1710 -16.7600 1.7800 H 0 0 0 0 0 0 0 0 0 0 0 0 0 0 0 0  
12.8940 -16.9300 2.1820 H 0 0 0 0 0 0 0 0 0 0 0 0 0 0 0 0  
12.4090 -15.1760 1.0740 C 0 0 0 0 0 0 0 0 0 0 0 0 0 0 0 0  
12.7900 -14.5000 2.1970 O 0 0 0 0 0 0 0 0 0 0 0 0 0 0 0 0  
13.0420 -13.1000 1.9940 C 0 0 0 0 0 0 0 0 0 0 0 0 0 0 0 0  
13.7820 -12.9820 1.1920 H 0 0 0 0 0 0 0 0 0 0 0 0 0 0 0 0  
12.1030 -12.6310 1.6750 H 0 0 0 0 0 0 0 0 0 0 0 0 0 0 0 0  
13.5730 -12.4350 3.2970 C 0 0 0 3 0 0 0 0 0 0 0 0 0 0 0 0  
12.4740 -12.5500 4.3890 C 0 0 0 0 0 0 0 0 0 0 0 0 0 0 0 0  
11.5050 -12.2400 3.9780 H 0 0 0 0 0 0 0 0 0 0 0 0 0 0 0 0  
12.3820 -13.5830 4.7420 H 0 0 0 0 0 0 0 0 0 0 0 0 0 0 0 0  
12.8120 -11.7180 5.5110 O 0 0 0 0 0 0 0 0 0 0 0 0 0 0 0 0  
11.7880 -11.3640 6.3340 C 0 0 0 0 0 0 0 0 0 0 0 0 0 0 0 0  
12.2410 -10.2770 7.2680 C 0 0 0 0 0 0 0 0 0 0 0 0 0 0 0 0  
12.6950 -9.4880 6.6630 H 0 0 0 0 0 0 0 0 0 0 0 0 0 0 0 0  
11.3500 -9.8360 7.7290 H 0 0 0 0 0 0 0 0 0 0 0 0 0 0 0 0  
13.1900 -10.8310 8.3290 C 0 0 0 0 0 0 0 0 0 0 0 0 0 0 0 0  
12.5800 -11.3610 9.0730 H 0 0 0 0 0 0 0 0 0 0 0 0 0 0 0 0  
13.8390 -11.6130 7.9150 H 0 0 0 0 0 0 0 0 0 0 0 0 0 0 0 0  
12.2390 -14.6740 -0.0310 O 0 0 0 0 0 0 0 0 0 0 0 0 0 0 0 0  
10.6590 -11.8350 6.3170 O 0 0 0 0 0 0 0 0 0 0 0 0 0 0 0 0  
14.8660 -13.1930 3.7400 C 0 0 0 0 0 0 0 0 0 0 0 0 0 0 0 0  
14.6180 -14.2350 3.9810 H 0 0 0 0 0 0 0 0 0 0 0 0 0 0 0 0  
15.5540 -13.2380 2.8850 H 0 0 0 0 0 0 0 0 0 0 0 0 0 0 0 0  
13.9090 -10.9470 2.9970 C 0 0 0 0 0 0 0 0 0 0 0 0 0 0 0 0  
14.0880 -10.3550 3.9020 H 0 0 0 0 0 0 0 0 0 0 0 0 0 0 0 0  
14.8380 -10.8950 2.4160 H 0 0 0 0 0 0 0 0 0 0 0 0 0 0 0 0









|        |    |   |   |   |   |   |
|--------|----|---|---|---|---|---|
| 40     | 43 | 1 | 0 | 0 | 0 | 0 |
| 43     | 44 | 1 | 0 | 0 | 0 | 0 |
| 44     | 45 | 1 | 0 | 0 | 0 | 0 |
| 44     | 52 | 2 | 0 | 0 | 0 | 0 |
| 45     | 46 | 1 | 0 | 0 | 0 | 0 |
| 45     | 47 | 1 | 0 | 0 | 0 | 0 |
| 45     | 48 | 1 | 0 | 0 | 0 | 0 |
| 48     | 49 | 1 | 0 | 0 | 0 | 0 |
| 48     | 50 | 1 | 0 | 0 | 0 | 0 |
| 48     | 80 | 1 | 0 | 0 | 0 | 0 |
| 53     | 54 | 1 | 0 | 0 | 0 | 0 |
| 53     | 55 | 1 | 0 | 0 | 0 | 0 |
| 53     | 59 | 1 | 0 | 0 | 0 | 0 |
| 56     | 57 | 1 | 0 | 0 | 0 | 0 |
| 56     | 58 | 1 | 0 | 0 | 0 | 0 |
| 56     | 63 | 1 | 0 | 0 | 0 | 0 |
| 59     | 60 | 1 | 0 | 0 | 0 | 0 |
| 59     | 61 | 1 | 0 | 0 | 0 | 0 |
| 59     | 62 | 1 | 0 | 0 | 0 | 0 |
| 63     | 64 | 1 | 0 | 0 | 0 | 0 |
| 64     | 65 | 2 | 0 | 0 | 0 | 0 |
| 66     | 67 | 1 | 0 | 0 | 0 | 0 |
| 66     | 68 | 1 | 0 | 0 | 0 | 0 |
| 68     | 69 | 1 | 0 | 0 | 0 | 0 |
| 68     | 70 | 1 | 0 | 0 | 0 | 0 |
| 68     | 71 | 1 | 0 | 0 | 0 | 0 |
| 71     | 72 | 1 | 0 | 0 | 0 | 0 |
| 71     | 73 | 1 | 0 | 0 | 0 | 0 |
| 71     | 74 | 1 | 0 | 0 | 0 | 0 |
| 74     | 75 | 1 | 0 | 0 | 0 | 0 |
| 74     | 76 | 1 | 0 | 0 | 0 | 0 |
| 74     | 77 | 1 | 0 | 0 | 0 | 0 |
| 77     | 78 | 1 | 0 | 0 | 0 | 0 |
| 77     | 79 | 1 | 0 | 0 | 0 | 0 |
| 77     | 80 | 1 | 0 | 0 | 0 | 0 |
| 80     | 92 | 1 | 0 | 0 | 0 | 0 |
| 81     | 82 | 1 | 0 | 0 | 0 | 0 |
| 81     | 90 | 2 | 0 | 0 | 0 | 0 |
| 811    | 28 | 1 | 0 | 0 | 0 | 0 |
| 82     | 83 | 1 | 0 | 0 | 0 | 0 |
| 82     | 84 | 2 | 0 | 0 | 0 | 0 |
| 84     | 85 | 1 | 0 | 0 | 0 | 0 |
| 84     | 86 | 1 | 0 | 0 | 0 | 0 |
| 86     | 87 | 1 | 0 | 0 | 0 | 0 |
| 86     | 88 | 2 | 0 | 0 | 0 | 0 |
| 88     | 89 | 1 | 0 | 0 | 0 | 0 |
| 88     | 90 | 1 | 0 | 0 | 0 | 0 |
| 90     | 91 | 1 | 0 | 0 | 0 | 0 |
| 92     | 93 | 1 | 0 | 0 | 0 | 0 |
| 92     | 94 | 1 | 0 | 0 | 0 | 0 |
| 92     | 95 | 1 | 0 | 0 | 0 | 0 |
| 95     | 96 | 1 | 0 | 0 | 0 | 0 |
| 95     | 97 | 1 | 0 | 0 | 0 | 0 |
| 95     | 98 | 1 | 0 | 0 | 0 | 0 |
| 98     | 99 | 1 | 0 | 0 | 0 | 0 |
| 98115  | 2  | 0 | 0 | 0 | 0 | 0 |
| 99100  | 1  | 0 | 0 | 0 | 0 | 0 |
| 100101 | 1  | 0 | 0 | 0 | 0 | 0 |
| 100102 | 1  | 0 | 0 | 0 | 0 | 0 |
| 100103 | 1  | 0 | 0 | 0 | 0 | 0 |
| 103104 | 1  | 0 | 0 | 0 | 0 | 0 |
| 103117 | 1  | 0 | 0 | 0 | 0 | 0 |
| 103120 | 1  | 0 | 0 | 0 | 0 | 0 |
| 104105 | 1  | 0 | 0 | 0 | 0 | 0 |
| 104106 | 1  | 0 | 0 | 0 | 0 | 0 |
| 104107 | 1  | 0 | 0 | 0 | 0 | 0 |
| 107108 | 1  | 0 | 0 | 0 | 0 | 0 |
| 108109 | 1  | 0 | 0 | 0 | 0 | 0 |
| 108116 | 2  | 0 | 0 | 0 | 0 | 0 |
| 109110 | 1  | 0 | 0 | 0 | 0 | 0 |
| 109111 | 1  | 0 | 0 | 0 | 0 | 0 |
| 109112 | 1  | 0 | 0 | 0 | 0 | 0 |
| 112113 | 1  | 0 | 0 | 0 | 0 | 0 |
| 112114 | 1  | 0 | 0 | 0 | 0 | 0 |
| 112144 | 1  | 0 | 0 | 0 | 0 | 0 |
| 117118 | 1  | 0 | 0 | 0 | 0 | 0 |
| 117119 | 1  | 0 | 0 | 0 | 0 | 0 |
| 117123 | 1  | 0 | 0 | 0 | 0 | 0 |
| 120121 | 1  | 0 | 0 | 0 | 0 | 0 |
| 120122 | 1  | 0 | 0 | 0 | 0 | 0 |
| 120127 | 1  | 0 | 0 | 0 | 0 | 0 |

|        |   |   |   |   |   |
|--------|---|---|---|---|---|
| 123124 | 1 | 0 | 0 | 0 | 0 |
| 123125 | 1 | 0 | 0 | 0 | 0 |
| 123126 | 1 | 0 | 0 | 0 | 0 |
| 127128 | 1 | 0 | 0 | 0 | 0 |
| 128129 | 2 | 0 | 0 | 0 | 0 |
| 130131 | 1 | 0 | 0 | 0 | 0 |
| 130132 | 1 | 0 | 0 | 0 | 0 |
| 132133 | 1 | 0 | 0 | 0 | 0 |
| 132134 | 1 | 0 | 0 | 0 | 0 |
| 132135 | 1 | 0 | 0 | 0 | 0 |
| 135136 | 1 | 0 | 0 | 0 | 0 |
| 135137 | 1 | 0 | 0 | 0 | 0 |
| 135138 | 1 | 0 | 0 | 0 | 0 |
| 138139 | 1 | 0 | 0 | 0 | 0 |
| 138140 | 1 | 0 | 0 | 0 | 0 |
| 138141 | 1 | 0 | 0 | 0 | 0 |
| 141142 | 1 | 0 | 0 | 0 | 0 |
| 141143 | 1 | 0 | 0 | 0 | 0 |
| 141144 | 1 | 0 | 0 | 0 | 0 |
| 144156 | 1 | 0 | 0 | 0 | 0 |
| 145146 | 1 | 0 | 0 | 0 | 0 |
| 145154 | 2 | 0 | 0 | 0 | 0 |
| 145192 | 1 | 0 | 0 | 0 | 0 |
| 146147 | 1 | 0 | 0 | 0 | 0 |
| 146148 | 2 | 0 | 0 | 0 | 0 |
| 148149 | 1 | 0 | 0 | 0 | 0 |
| 148150 | 1 | 0 | 0 | 0 | 0 |
| 150151 | 1 | 0 | 0 | 0 | 0 |
| 150152 | 2 | 0 | 0 | 0 | 0 |
| 152153 | 1 | 0 | 0 | 0 | 0 |
| 152154 | 1 | 0 | 0 | 0 | 0 |
| 154155 | 1 | 0 | 0 | 0 | 0 |
| 156157 | 1 | 0 | 0 | 0 | 0 |
| 156158 | 1 | 0 | 0 | 0 | 0 |
| 156159 | 1 | 0 | 0 | 0 | 0 |
| 159160 | 1 | 0 | 0 | 0 | 0 |
| 159161 | 1 | 0 | 0 | 0 | 0 |
| 159162 | 1 | 0 | 0 | 0 | 0 |
| 162163 | 1 | 0 | 0 | 0 | 0 |
| 162179 | 2 | 0 | 0 | 0 | 0 |
| 163164 | 1 | 0 | 0 | 0 | 0 |
| 164165 | 1 | 0 | 0 | 0 | 0 |
| 164166 | 1 | 0 | 0 | 0 | 0 |
| 164167 | 1 | 0 | 0 | 0 | 0 |
| 167168 | 1 | 0 | 0 | 0 | 0 |
| 167181 | 1 | 0 | 0 | 0 | 0 |
| 167184 | 1 | 0 | 0 | 0 | 0 |
| 168169 | 1 | 0 | 0 | 0 | 0 |
| 168170 | 1 | 0 | 0 | 0 | 0 |
| 168171 | 1 | 0 | 0 | 0 | 0 |
| 171172 | 1 | 0 | 0 | 0 | 0 |
| 172173 | 1 | 0 | 0 | 0 | 0 |
| 172180 | 2 | 0 | 0 | 0 | 0 |
| 173174 | 1 | 0 | 0 | 0 | 0 |
| 173175 | 1 | 0 | 0 | 0 | 0 |
| 173176 | 1 | 0 | 0 | 0 | 0 |
| 176177 | 1 | 0 | 0 | 0 | 0 |
| 176178 | 1 | 0 | 0 | 0 | 0 |
| 176208 | 1 | 0 | 0 | 0 | 0 |
| 181182 | 1 | 0 | 0 | 0 | 0 |
| 181183 | 1 | 0 | 0 | 0 | 0 |
| 181187 | 1 | 0 | 0 | 0 | 0 |
| 184185 | 1 | 0 | 0 | 0 | 0 |
| 184186 | 1 | 0 | 0 | 0 | 0 |
| 184191 | 1 | 0 | 0 | 0 | 0 |
| 187188 | 1 | 0 | 0 | 0 | 0 |
| 187189 | 1 | 0 | 0 | 0 | 0 |
| 187190 | 1 | 0 | 0 | 0 | 0 |
| 191192 | 1 | 0 | 0 | 0 | 0 |
| 192193 | 2 | 0 | 0 | 0 | 0 |
| 194195 | 1 | 0 | 0 | 0 | 0 |
| 194196 | 1 | 0 | 0 | 0 | 0 |
| 196197 | 1 | 0 | 0 | 0 | 0 |
| 196198 | 1 | 0 | 0 | 0 | 0 |
| 196199 | 1 | 0 | 0 | 0 | 0 |
| 199200 | 1 | 0 | 0 | 0 | 0 |
| 199201 | 1 | 0 | 0 | 0 | 0 |
| 199202 | 1 | 0 | 0 | 0 | 0 |
| 202203 | 1 | 0 | 0 | 0 | 0 |
| 202204 | 1 | 0 | 0 | 0 | 0 |
| 202205 | 1 | 0 | 0 | 0 | 0 |

|        |   |   |   |   |   |
|--------|---|---|---|---|---|
| 205206 | 1 | 0 | 0 | 0 | 0 |
| 205207 | 1 | 0 | 0 | 0 | 0 |
| 205208 | 1 | 0 | 0 | 0 | 0 |
| 208220 | 1 | 0 | 0 | 0 | 0 |
| 209210 | 1 | 0 | 0 | 0 | 0 |
| 209218 | 2 | 0 | 0 | 0 | 0 |
| 209256 | 1 | 0 | 0 | 0 | 0 |
| 210211 | 1 | 0 | 0 | 0 | 0 |
| 210212 | 2 | 0 | 0 | 0 | 0 |
| 212213 | 1 | 0 | 0 | 0 | 0 |
| 212214 | 1 | 0 | 0 | 0 | 0 |
| 214215 | 1 | 0 | 0 | 0 | 0 |
| 214216 | 2 | 0 | 0 | 0 | 0 |
| 216217 | 1 | 0 | 0 | 0 | 0 |
| 216218 | 1 | 0 | 0 | 0 | 0 |
| 218219 | 1 | 0 | 0 | 0 | 0 |
| 220221 | 1 | 0 | 0 | 0 | 0 |
| 220222 | 1 | 0 | 0 | 0 | 0 |
| 220223 | 1 | 0 | 0 | 0 | 0 |
| 223224 | 1 | 0 | 0 | 0 | 0 |
| 223225 | 1 | 0 | 0 | 0 | 0 |
| 223226 | 1 | 0 | 0 | 0 | 0 |
| 226227 | 1 | 0 | 0 | 0 | 0 |
| 226243 | 2 | 0 | 0 | 0 | 0 |
| 227228 | 1 | 0 | 0 | 0 | 0 |
| 228229 | 1 | 0 | 0 | 0 | 0 |
| 228230 | 1 | 0 | 0 | 0 | 0 |
| 228231 | 1 | 0 | 0 | 0 | 0 |
| 231232 | 1 | 0 | 0 | 0 | 0 |
| 231245 | 1 | 0 | 0 | 0 | 0 |
| 231248 | 1 | 0 | 0 | 0 | 0 |
| 232233 | 1 | 0 | 0 | 0 | 0 |
| 232234 | 1 | 0 | 0 | 0 | 0 |
| 232235 | 1 | 0 | 0 | 0 | 0 |
| 235236 | 1 | 0 | 0 | 0 | 0 |
| 236237 | 1 | 0 | 0 | 0 | 0 |
| 236244 | 2 | 0 | 0 | 0 | 0 |
| 237238 | 1 | 0 | 0 | 0 | 0 |
| 237239 | 1 | 0 | 0 | 0 | 0 |
| 237240 | 1 | 0 | 0 | 0 | 0 |
| 240241 | 1 | 0 | 0 | 0 | 0 |
| 240242 | 1 | 0 | 0 | 0 | 0 |
| 240272 | 1 | 0 | 0 | 0 | 0 |
| 245246 | 1 | 0 | 0 | 0 | 0 |
| 245247 | 1 | 0 | 0 | 0 | 0 |
| 245251 | 1 | 0 | 0 | 0 | 0 |
| 248249 | 1 | 0 | 0 | 0 | 0 |
| 248250 | 1 | 0 | 0 | 0 | 0 |
| 248255 | 1 | 0 | 0 | 0 | 0 |
| 251252 | 1 | 0 | 0 | 0 | 0 |
| 251253 | 1 | 0 | 0 | 0 | 0 |
| 251254 | 1 | 0 | 0 | 0 | 0 |
| 255256 | 1 | 0 | 0 | 0 | 0 |
| 256257 | 2 | 0 | 0 | 0 | 0 |
| 258259 | 1 | 0 | 0 | 0 | 0 |
| 258260 | 1 | 0 | 0 | 0 | 0 |
| 260261 | 1 | 0 | 0 | 0 | 0 |
| 260262 | 1 | 0 | 0 | 0 | 0 |
| 260263 | 1 | 0 | 0 | 0 | 0 |
| 263264 | 1 | 0 | 0 | 0 | 0 |
| 263265 | 1 | 0 | 0 | 0 | 0 |
| 263266 | 1 | 0 | 0 | 0 | 0 |
| 266267 | 1 | 0 | 0 | 0 | 0 |
| 266268 | 1 | 0 | 0 | 0 | 0 |
| 266269 | 1 | 0 | 0 | 0 | 0 |
| 269270 | 1 | 0 | 0 | 0 | 0 |
| 269271 | 1 | 0 | 0 | 0 | 0 |
| 269272 | 1 | 0 | 0 | 0 | 0 |
| 272284 | 1 | 0 | 0 | 0 | 0 |
| 273274 | 1 | 0 | 0 | 0 | 0 |
| 273282 | 2 | 0 | 0 | 0 | 0 |
| 273320 | 1 | 0 | 0 | 0 | 0 |
| 274275 | 1 | 0 | 0 | 0 | 0 |
| 274276 | 2 | 0 | 0 | 0 | 0 |
| 276277 | 1 | 0 | 0 | 0 | 0 |
| 276278 | 1 | 0 | 0 | 0 | 0 |
| 278279 | 1 | 0 | 0 | 0 | 0 |
| 278280 | 2 | 0 | 0 | 0 | 0 |
| 280281 | 1 | 0 | 0 | 0 | 0 |
| 280282 | 1 | 0 | 0 | 0 | 0 |
| 282283 | 1 | 0 | 0 | 0 | 0 |



```

284285 1 0 0 0 0
284286 1 0 0 0 0
284287 1 0 0 0 0
287288 1 0 0 0 0
287289 1 0 0 0 0
287290 1 0 0 0 0
290291 1 0 0 0 0
290307 2 0 0 0 0
291292 1 0 0 0 0
292293 1 0 0 0 0
292294 1 0 0 0 0
292295 1 0 0 0 0
295296 1 0 0 0 0
295309 1 0 0 0 0
295312 1 0 0 0 0
296297 1 0 0 0 0
296298 1 0 0 0 0
296299 1 0 0 0 0
299300 1 0 0 0 0
300301 1 0 0 0 0
300308 2 0 0 0 0
301302 1 0 0 0 0
301303 1 0 0 0 0
301304 1 0 0 0 0
304305 1 0 0 0 0
304306 1 0 0 0 0
304336 1 0 0 0 0
309310 1 0 0 0 0
309311 1 0 0 0 0
309315 1 0 0 0 0
312313 1 0 0 0 0
312314 1 0 0 0 0
312319 1 0 0 0 0
315316 1 0 0 0 0
315317 1 0 0 0 0
315318 1 0 0 0 0
319320 1 0 0 0 0
320321 2 0 0 0 0
322323 1 0 0 0 0
322324 1 0 0 0 0
324325 1 0 0 0 0
324326 1 0 0 0 0
324327 1 0 0 0 0
327328 1 0 0 0 0
327329 1 0 0 0 0
327330 1 0 0 0 0
330331 1 0 0 0 0
330332 1 0 0 0 0
330333 1 0 0 0 0
333334 1 0 0 0 0
333335 1 0 0 0 0
333336 1 0 0 0 0
336337 1 0 0 0 0

```

```

M END
> <NAME>
AA28_12

```

```

$$$$
AA28_12
MOE2012 3D

```

```

337341 0 0 1 0 0 0 0 0 0999 V2000
10.0310 -23.4240 0.4090 O 0 0 0 0 0 0 0 0 0 0 0 0 0 0 0 0
10.2940 -24.2500 0.8490 H 0 0 0 0 0 0 0 0 0 0 0 0 0 0 0 0
10.8920 -22.4020 0.8870 C 0 0 0 0 0 0 0 0 0 0 0 0 0 0 0 0
10.7730 -22.3280 1.9720 H 0 0 0 0 0 0 0 0 0 0 0 0 0 0 0 0
11.9270 -22.6790 0.6590 H 0 0 0 0 0 0 0 0 0 0 0 0 0 0 0 0
10.5160 -21.0960 0.2050 C 0 0 0 0 0 0 0 0 0 0 0 0 0 0 0 0
10.6320 -21.2030 -0.8810 H 0 0 0 0 0 0 0 0 0 0 0 0 0 0 0 0
9.4500 -20.8950 0.3740 H 0 0 0 0 0 0 0 0 0 0 0 0 0 0 0 0
11.3610 -19.9350 0.7180 C 0 0 0 0 0 0 0 0 0 0 0 0 0 0 0 0
11.2510 -19.8640 1.8080 H 0 0 0 0 0 0 0 0 0 0 0 0 0 0 0 0
12.4220 -20.1290 0.5130 H 0 0 0 0 0 0 0 0 0 0 0 0 0 0 0 0
10.9380 -18.6170 0.0680 C 0 0 0 0 0 0 0 0 0 0 0 0 0 0 0 0
11.1120 -18.6630 -1.0130 H 0 0 0 0 0 0 0 0 0 0 0 0 0 0 0 0
9.8660 -18.4600 0.2360 H 0 0 0 0 0 0 0 0 0 0 0 0 0 0 0 0
11.7100 -17.5210 0.6560 N 0 0 3 0 0 0 0 0 0 0 0 0 0 0 0 0
11.5870 -17.5430 1.6750 H 0 0 0 0 0 0 0 0 0 0 0 0 0 0 0 0
12.1750 -15.9700 8.7950 C 0 0 0 0 0 0 0 0 0 0 0 0 0 0 0 0
11.5780 -16.8580 7.8900 C 0 0 0 0 0 0 0 0 0 0 0 0 0 0 0 0
11.5510 -16.6470 6.8240 H 0 0 0 0 0 0 0 0 0 0 0 0 0 0 0 0

```





|         |          |         |   |   |   |   |   |   |   |   |   |   |   |   |   |   |
|---------|----------|---------|---|---|---|---|---|---|---|---|---|---|---|---|---|---|
| 30.1220 | -4.3880  | 6.7660  | H | 0 | 0 | 0 | 0 | 0 | 0 | 0 | 0 | 0 | 0 | 0 | 0 | 0 |
| 29.5920 | -5.8320  | 7.6120  | H | 0 | 0 | 0 | 0 | 0 | 0 | 0 | 0 | 0 | 0 | 0 | 0 | 0 |
| 30.7600 | -7.7210  | 5.9070  | C | 0 | 0 | 0 | 0 | 0 | 0 | 0 | 0 | 0 | 0 | 0 | 0 | 0 |
| 31.7700 | -7.8210  | 6.3150  | H | 0 | 0 | 0 | 0 | 0 | 0 | 0 | 0 | 0 | 0 | 0 | 0 | 0 |
| 30.0660 | -8.1500  | 6.6400  | H | 0 | 0 | 0 | 0 | 0 | 0 | 0 | 0 | 0 | 0 | 0 | 0 | 0 |
| 31.6710 | -5.4210  | 7.7910  | C | 0 | 0 | 0 | 0 | 0 | 0 | 0 | 0 | 0 | 0 | 0 | 0 | 0 |
| 32.4800 | -4.9000  | 7.2740  | H | 0 | 0 | 0 | 0 | 0 | 0 | 0 | 0 | 0 | 0 | 0 | 0 | 0 |
| 32.0040 | -6.4290  | 8.0500  | H | 0 | 0 | 0 | 0 | 0 | 0 | 0 | 0 | 0 | 0 | 0 | 0 | 0 |
| 31.4980 | -4.8850  | 8.7310  | H | 0 | 0 | 0 | 0 | 0 | 0 | 0 | 0 | 0 | 0 | 0 | 0 | 0 |
| 30.7500 | -8.4530  | 4.6660  | O | 0 | 0 | 0 | 0 | 0 | 0 | 0 | 0 | 0 | 0 | 0 | 0 | 0 |
| 30.0210 | -9.5960  | 4.6110  | C | 0 | 0 | 0 | 0 | 0 | 0 | 0 | 0 | 0 | 0 | 0 | 0 | 0 |
| 29.4200 | -10.1270 | 5.5340  | O | 0 | 0 | 0 | 0 | 0 | 0 | 0 | 0 | 0 | 0 | 0 | 0 | 0 |
| 40.2600 | -3.8890  | 9.2060  | O | 0 | 0 | 0 | 0 | 0 | 0 | 0 | 0 | 0 | 0 | 0 | 0 | 0 |
| 40.6220 | -4.3120  | 10.0030 | H | 0 | 0 | 0 | 0 | 0 | 0 | 0 | 0 | 0 | 0 | 0 | 0 | 0 |
| 39.5690 | -4.9010  | 8.4840  | C | 0 | 0 | 0 | 0 | 0 | 0 | 0 | 0 | 0 | 0 | 0 | 0 | 0 |
| 40.2380 | -5.7570  | 8.3590  | H | 0 | 0 | 0 | 0 | 0 | 0 | 0 | 0 | 0 | 0 | 0 | 0 | 0 |
| 38.7010 | -5.2170  | 9.0700  | H | 0 | 0 | 0 | 0 | 0 | 0 | 0 | 0 | 0 | 0 | 0 | 0 | 0 |
| 39.1390 | -4.3490  | 7.1300  | C | 0 | 0 | 0 | 0 | 0 | 0 | 0 | 0 | 0 | 0 | 0 | 0 | 0 |
| 38.4520 | -3.5080  | 7.2830  | H | 0 | 0 | 0 | 0 | 0 | 0 | 0 | 0 | 0 | 0 | 0 | 0 | 0 |
| 40.0120 | -3.9330  | 6.6130  | H | 0 | 0 | 0 | 0 | 0 | 0 | 0 | 0 | 0 | 0 | 0 | 0 | 0 |
| 38.4800 | -5.4240  | 6.2630  | C | 0 | 0 | 0 | 0 | 0 | 0 | 0 | 0 | 0 | 0 | 0 | 0 | 0 |
| 39.1840 | -6.2530  | 6.1270  | H | 0 | 0 | 0 | 0 | 0 | 0 | 0 | 0 | 0 | 0 | 0 | 0 | 0 |
| 37.6050 | -5.8320  | 6.7860  | H | 0 | 0 | 0 | 0 | 0 | 0 | 0 | 0 | 0 | 0 | 0 | 0 | 0 |
| 38.0500 | -4.8600  | 4.9030  | C | 0 | 0 | 0 | 0 | 0 | 0 | 0 | 0 | 0 | 0 | 0 | 0 | 0 |
| 37.3080 | -4.0700  | 5.0750  | H | 0 | 0 | 0 | 0 | 0 | 0 | 0 | 0 | 0 | 0 | 0 | 0 | 0 |
| 38.8950 | -4.3530  | 4.4210  | H | 0 | 0 | 0 | 0 | 0 | 0 | 0 | 0 | 0 | 0 | 0 | 0 | 0 |
| 37.5080 | -5.9420  | 4.0570  | N | 0 | 0 | 3 | 0 | 0 | 0 | 0 | 0 | 0 | 0 | 0 | 0 | 0 |
| 43.1270 | -5.5520  | 6.4380  | C | 0 | 0 | 0 | 0 | 0 | 0 | 0 | 0 | 0 | 0 | 0 | 0 | 0 |
| 43.2390 | -5.4430  | 5.0460  | C | 0 | 0 | 0 | 0 | 0 | 0 | 0 | 0 | 0 | 0 | 0 | 0 | 0 |
| 43.1450 | -6.3160  | 4.4040  | H | 0 | 0 | 0 | 0 | 0 | 0 | 0 | 0 | 0 | 0 | 0 | 0 | 0 |
| 43.4770 | -4.2000  | 4.4560  | C | 0 | 0 | 0 | 0 | 0 | 0 | 0 | 0 | 0 | 0 | 0 | 0 | 0 |
| 43.5610 | -4.1180  | 3.3750  | H | 0 | 0 | 0 | 0 | 0 | 0 | 0 | 0 | 0 | 0 | 0 | 0 | 0 |
| 43.6060 | -3.0630  | 5.2510  | C | 0 | 0 | 0 | 0 | 0 | 0 | 0 | 0 | 0 | 0 | 0 | 0 | 0 |
| 43.7910 | -2.0950  | 4.7910  | H | 0 | 0 | 0 | 0 | 0 | 0 | 0 | 0 | 0 | 0 | 0 | 0 | 0 |
| 43.4940 | -3.1630  | 6.6370  | C | 0 | 0 | 0 | 0 | 0 | 0 | 0 | 0 | 0 | 0 | 0 | 0 | 0 |
| 43.5880 | -2.2760  | 7.2570  | H | 0 | 0 | 0 | 0 | 0 | 0 | 0 | 0 | 0 | 0 | 0 | 0 | 0 |
| 43.2550 | -4.4040  | 7.2300  | C | 0 | 0 | 0 | 0 | 0 | 0 | 0 | 0 | 0 | 0 | 0 | 0 | 0 |
| 43.1640 | -4.4640  | 8.3130  | H | 0 | 0 | 0 | 0 | 0 | 0 | 0 | 0 | 0 | 0 | 0 | 0 | 0 |
| 38.3910 | -6.2440  | 2.9070  | C | 0 | 0 | 0 | 0 | 0 | 0 | 0 | 0 | 0 | 0 | 0 | 0 | 0 |
| 38.5440 | -5.3350  | 2.3100  | H | 0 | 0 | 0 | 0 | 0 | 0 | 0 | 0 | 0 | 0 | 0 | 0 | 0 |
| 37.8910 | -6.9650  | 2.2460  | H | 0 | 0 | 0 | 0 | 0 | 0 | 0 | 0 | 0 | 0 | 0 | 0 | 0 |
| 39.7540 | -6.8350  | 3.2740  | C | 0 | 0 | 0 | 0 | 0 | 0 | 0 | 0 | 0 | 0 | 0 | 0 | 0 |
| 40.3660 | -6.8960  | 2.3660  | H | 0 | 0 | 0 | 0 | 0 | 0 | 0 | 0 | 0 | 0 | 0 | 0 | 0 |
| 40.2810 | -6.1940  | 3.9870  | H | 0 | 0 | 0 | 0 | 0 | 0 | 0 | 0 | 0 | 0 | 0 | 0 | 0 |
| 39.6580 | -8.2340  | 3.8360  | C | 0 | 0 | 0 | 0 | 0 | 0 | 0 | 0 | 0 | 0 | 0 | 0 | 0 |
| 40.8670 | -8.5820  | 4.3690  | O | 0 | 0 | 0 | 0 | 0 | 0 | 0 | 0 | 0 | 0 | 0 | 0 | 0 |
| 40.9140 | -9.8840  | 4.9740  | C | 0 | 0 | 0 | 0 | 0 | 0 | 0 | 0 | 0 | 0 | 0 | 0 | 0 |
| 40.1350 | -9.9290  | 5.7430  | H | 0 | 0 | 0 | 0 | 0 | 0 | 0 | 0 | 0 | 0 | 0 | 0 | 0 |
| 40.6940 | -10.6370 | 4.2060  | H | 0 | 0 | 0 | 0 | 0 | 0 | 0 | 0 | 0 | 0 | 0 | 0 | 0 |
| 42.3070 | -10.1670 | 5.6030  | C | 0 | 0 | 3 | 0 | 0 | 0 | 0 | 0 | 0 | 0 | 0 | 0 | 0 |
| 43.3850 | -10.0420 | 4.4910  | C | 0 | 0 | 0 | 0 | 0 | 0 | 0 | 0 | 0 | 0 | 0 | 0 | 0 |
| 43.1860 | -10.7580 | 3.6850  | H | 0 | 0 | 0 | 0 | 0 | 0 | 0 | 0 | 0 | 0 | 0 | 0 | 0 |
| 43.3660 | -9.0490  | 4.0280  | H | 0 | 0 | 0 | 0 | 0 | 0 | 0 | 0 | 0 | 0 | 0 | 0 | 0 |
| 44.7120 | -10.2030 | 5.0350  | O | 0 | 0 | 0 | 0 | 0 | 0 | 0 | 0 | 0 | 0 | 0 | 0 | 0 |
| 45.4480 | -11.2750 | 4.6180  | C | 0 | 0 | 0 | 0 | 0 | 0 | 0 | 0 | 0 | 0 | 0 | 0 | 0 |
| 46.8160 | -11.2140 | 5.2600  | C | 0 | 0 | 0 | 0 | 0 | 0 | 0 | 0 | 0 | 0 | 0 | 0 | 0 |
| 47.2330 | -10.2200 | 5.0650  | H | 0 | 0 | 0 | 0 | 0 | 0 | 0 | 0 | 0 | 0 | 0 | 0 | 0 |
| 46.6790 | -11.3370 | 6.3390  | H | 0 | 0 | 0 | 0 | 0 | 0 | 0 | 0 | 0 | 0 | 0 | 0 | 0 |
| 47.7570 | -12.2830 | 4.6860  | C | 0 | 0 | 0 | 0 | 0 | 0 | 0 | 0 | 0 | 0 | 0 | 0 | 0 |
| 47.3590 | -13.2910 | 4.8630  | H | 0 | 0 | 0 | 0 | 0 | 0 | 0 | 0 | 0 | 0 | 0 | 0 | 0 |
| 47.7640 | -12.1420 | 3.5970  | H | 0 | 0 | 0 | 0 | 0 | 0 | 0 | 0 | 0 | 0 | 0 | 0 | 0 |
| 38.6790 | -8.9640  | 3.7900  | O | 0 | 0 | 0 | 0 | 0 | 0 | 0 | 0 | 0 | 0 | 0 | 0 | 0 |
| 45.0600 | -12.1510 | 3.8600  | O | 0 | 0 | 0 | 0 | 0 | 0 | 0 | 0 | 0 | 0 | 0 | 0 | 0 |
| 42.3470 | -11.6170 | 6.1730  | C | 0 | 0 | 0 | 0 | 0 | 0 | 0 | 0 | 0 | 0 | 0 | 0 | 0 |
| 42.2200 | -12.3310 | 5.3490  | H | 0 | 0 | 0 | 0 | 0 | 0 | 0 | 0 | 0 | 0 | 0 | 0 | 0 |
| 43.3390 | -11.8160 | 6.5990  | H | 0 | 0 | 0 | 0 | 0 | 0 | 0 | 0 | 0 | 0 | 0 | 0 | 0 |
| 42.5930 | -9.1530  | 6.7430  | C | 0 | 0 | 0 | 0 | 0 | 0 | 0 | 0 | 0 | 0 | 0 | 0 | 0 |
| 41.7410 | -9.1130  | 7.4330  | H | 0 | 0 | 0 | 0 | 0 | 0 | 0 | 0 | 0 | 0 | 0 | 0 | 0 |
| 43.4840 | -9.4540  | 7.3080  | H | 0 | 0 | 0 | 0 | 0 | 0 | 0 | 0 | 0 | 0 | 0 | 0 | 0 |
| 41.3150 | -11.9480 | 7.2450  | C | 0 | 0 | 0 | 0 | 0 | 0 | 0 | 0 | 0 | 0 | 0 | 0 | 0 |
| 40.2930 | -11.8750 | 6.8610  | H | 0 | 0 | 0 | 0 | 0 | 0 | 0 | 0 | 0 | 0 | 0 | 0 | 0 |
| 41.4110 | -11.2950 | 8.1160  | H | 0 | 0 | 0 | 0 | 0 | 0 | 0 | 0 | 0 | 0 | 0 | 0 | 0 |
| 41.4590 | -12.9770 | 7.5900  | H | 0 | 0 | 0 | 0 | 0 | 0 | 0 | 0 | 0 | 0 | 0 | 0 | 0 |
| 42.8310 | -7.8430  | 6.2070  | O | 0 | 0 | 0 | 0 | 0 | 0 | 0 | 0 | 0 | 0 | 0 | 0 | 0 |
| 42.8690 | -6.8350  | 7.1120  | C | 0 | 0 | 0 | 0 | 0 | 0 | 0 | 0 | 0 | 0 | 0 | 0 | 0 |
| 42.7080 | -6.9430  | 8.3190  | O | 0 | 0 | 0 | 0 | 0 | 0 | 0 | 0 | 0 | 0 | 0 | 0 | 0 |
| 49.7930 | -8.0860  | 7.0350  | O | 0 | 0 | 0 | 0 | 0 | 0 | 0 | 0 | 0 | 0 | 0 | 0 | 0 |
| 50.3860 | -7.8840  | 7.7790  | H | 0 | 0 | 0 | 0 | 0 | 0 | 0 | 0 | 0 | 0 | 0 | 0 | 0 |
| 50.0740 | -9.4210  | 6.6270  | C | 0 | 0 | 0 | 0 | 0 | 0 | 0 | 0 | 0 | 0 | 0 | 0 | 0 |
| 49.5010 | -9.6110  | 5.7190  | H | 0 | 0 | 0 | 0 | 0 | 0 | 0 | 0 | 0 | 0 | 0 | 0 | 0 |
| 51.1390 | -9.4850  | 6.3820  | H | 0 | 0 | 0 | 0 | 0 | 0 | 0 | 0 | 0 | 0 | 0 | 0 | 0 |

|         |          |         |   |   |   |   |   |   |   |   |   |   |   |   |   |   |   |   |   |
|---------|----------|---------|---|---|---|---|---|---|---|---|---|---|---|---|---|---|---|---|---|
| 49.7020 | -10.3810 | 7.7500  | C | 0 | 0 | 0 | 0 | 0 | 0 | 0 | 0 | 0 | 0 | 0 | 0 | 0 | 0 | 0 | 0 |
| 50.1780 | -10.0270 | 8.6740  | H | 0 | 0 | 0 | 0 | 0 | 0 | 0 | 0 | 0 | 0 | 0 | 0 | 0 | 0 | 0 | 0 |
| 48.6240 | -10.3300 | 7.9450  | H | 0 | 0 | 0 | 0 | 0 | 0 | 0 | 0 | 0 | 0 | 0 | 0 | 0 | 0 | 0 | 0 |
| 50.1440 | -11.8270 | 7.5120  | C | 0 | 0 | 0 | 0 | 0 | 0 | 0 | 0 | 0 | 0 | 0 | 0 | 0 | 0 | 0 | 0 |
| 51.1780 | -11.8400 | 7.1620  | H | 0 | 0 | 0 | 0 | 0 | 0 | 0 | 0 | 0 | 0 | 0 | 0 | 0 | 0 | 0 | 0 |
| 50.1560 | -12.3310 | 8.4880  | H | 0 | 0 | 0 | 0 | 0 | 0 | 0 | 0 | 0 | 0 | 0 | 0 | 0 | 0 | 0 | 0 |
| 49.2240 | -12.6530 | 6.6000  | C | 0 | 0 | 0 | 0 | 0 | 0 | 0 | 0 | 0 | 0 | 0 | 0 | 0 | 0 | 0 | 0 |
| 49.5300 | -13.7060 | 6.6280  | H | 0 | 0 | 0 | 0 | 0 | 0 | 0 | 0 | 0 | 0 | 0 | 0 | 0 | 0 | 0 | 0 |
| 48.2360 | -12.6490 | 7.0770  | H | 0 | 0 | 0 | 0 | 0 | 0 | 0 | 0 | 0 | 0 | 0 | 0 | 0 | 0 | 0 | 0 |
| 49.1430 | -12.1640 | 5.2100  | N | 0 | 0 | 3 | 0 | 0 | 0 | 0 | 0 | 0 | 0 | 0 | 0 | 0 | 0 | 0 | 0 |
| 56.6470 | -17.2540 | 8.2630  | C | 0 | 0 | 0 | 0 | 0 | 0 | 0 | 0 | 0 | 0 | 0 | 0 | 0 | 0 | 0 | 0 |
| 56.9320 | -17.4110 | 6.9000  | C | 0 | 0 | 0 | 0 | 0 | 0 | 0 | 0 | 0 | 0 | 0 | 0 | 0 | 0 | 0 | 0 |
| 56.9520 | -16.5590 | 6.2250  | H | 0 | 0 | 0 | 0 | 0 | 0 | 0 | 0 | 0 | 0 | 0 | 0 | 0 | 0 | 0 | 0 |
| 57.1980 | -18.6800 | 6.3800  | C | 0 | 0 | 0 | 0 | 0 | 0 | 0 | 0 | 0 | 0 | 0 | 0 | 0 | 0 | 0 | 0 |
| 57.4220 | -18.7970 | 5.3230  | H | 0 | 0 | 0 | 0 | 0 | 0 | 0 | 0 | 0 | 0 | 0 | 0 | 0 | 0 | 0 | 0 |
| 57.1780 | -19.7950 | 7.2160  | C | 0 | 0 | 0 | 0 | 0 | 0 | 0 | 0 | 0 | 0 | 0 | 0 | 0 | 0 | 0 | 0 |
| 57.3840 | -20.7830 | 6.8100  | H | 0 | 0 | 0 | 0 | 0 | 0 | 0 | 0 | 0 | 0 | 0 | 0 | 0 | 0 | 0 | 0 |
| 56.8920 | -19.6460 | 8.5720  | C | 0 | 0 | 0 | 0 | 0 | 0 | 0 | 0 | 0 | 0 | 0 | 0 | 0 | 0 | 0 | 0 |
| 56.8740 | -20.5170 | 9.2230  | H | 0 | 0 | 0 | 0 | 0 | 0 | 0 | 0 | 0 | 0 | 0 | 0 | 0 | 0 | 0 | 0 |
| 56.6270 | -18.3800 | 9.0960  | C | 0 | 0 | 0 | 0 | 0 | 0 | 0 | 0 | 0 | 0 | 0 | 0 | 0 | 0 | 0 | 0 |
| 56.4040 | -18.2800 | 10.1570 | H | 0 | 0 | 0 | 0 | 0 | 0 | 0 | 0 | 0 | 0 | 0 | 0 | 0 | 0 | 0 | 0 |
| 50.0700 | -12.8960 | 4.3070  | C | 0 | 0 | 0 | 0 | 0 | 0 | 0 | 0 | 0 | 0 | 0 | 0 | 0 | 0 | 0 | 0 |
| 49.8240 | -12.6040 | 3.2770  | H | 0 | 0 | 0 | 0 | 0 | 0 | 0 | 0 | 0 | 0 | 0 | 0 | 0 | 0 | 0 | 0 |
| 49.8980 | -13.9780 | 4.3610  | H | 0 | 0 | 0 | 0 | 0 | 0 | 0 | 0 | 0 | 0 | 0 | 0 | 0 | 0 | 0 | 0 |
| 51.5540 | -12.5390 | 4.4660  | C | 0 | 0 | 0 | 0 | 0 | 0 | 0 | 0 | 0 | 0 | 0 | 0 | 0 | 0 | 0 | 0 |
| 52.0460 | -12.6280 | 3.4890  | H | 0 | 0 | 0 | 0 | 0 | 0 | 0 | 0 | 0 | 0 | 0 | 0 | 0 | 0 | 0 | 0 |
| 51.6630 | -11.5010 | 4.7950  | H | 0 | 0 | 0 | 0 | 0 | 0 | 0 | 0 | 0 | 0 | 0 | 0 | 0 | 0 | 0 | 0 |
| 52.3040 | -13.4570 | 5.3990  | C | 0 | 0 | 0 | 0 | 0 | 0 | 0 | 0 | 0 | 0 | 0 | 0 | 0 | 0 | 0 | 0 |
| 53.4840 | -12.8690 | 5.7680  | O | 0 | 0 | 0 | 0 | 0 | 0 | 0 | 0 | 0 | 0 | 0 | 0 | 0 | 0 | 0 | 0 |
| 54.2230 | -13.6010 | 6.7590  | C | 0 | 0 | 0 | 0 | 0 | 0 | 0 | 0 | 0 | 0 | 0 | 0 | 0 | 0 | 0 | 0 |
| 53.5820 | -13.7300 | 7.6410  | H | 0 | 0 | 0 | 0 | 0 | 0 | 0 | 0 | 0 | 0 | 0 | 0 | 0 | 0 | 0 | 0 |
| 54.4610 | -14.5930 | 6.3560  | H | 0 | 0 | 0 | 0 | 0 | 0 | 0 | 0 | 0 | 0 | 0 | 0 | 0 | 0 | 0 | 0 |
| 55.5240 | -12.8470 | 7.1670  | C | 0 | 0 | 3 | 0 | 0 | 0 | 0 | 0 | 0 | 0 | 0 | 0 | 0 | 0 | 0 | 0 |
| 56.4760 | -12.8340 | 5.9410  | C | 0 | 0 | 0 | 0 | 0 | 0 | 0 | 0 | 0 | 0 | 0 | 0 | 0 | 0 | 0 | 0 |
| 56.5260 | -13.8360 | 5.4960  | H | 0 | 0 | 0 | 0 | 0 | 0 | 0 | 0 | 0 | 0 | 0 | 0 | 0 | 0 | 0 | 0 |
| 56.1070 | -12.1370 | 5.1780  | H | 0 | 0 | 0 | 0 | 0 | 0 | 0 | 0 | 0 | 0 | 0 | 0 | 0 | 0 | 0 | 0 |
| 57.8060 | -12.4350 | 6.3230  | O | 0 | 0 | 0 | 0 | 0 | 0 | 0 | 0 | 0 | 0 | 0 | 0 | 0 | 0 | 0 | 0 |
| 58.7560 | -12.5730 | 5.3520  | C | 0 | 0 | 0 | 0 | 0 | 0 | 0 | 0 | 0 | 0 | 0 | 0 | 0 | 0 | 0 | 0 |
| 60.0910 | -12.1310 | 5.8920  | C | 0 | 0 | 0 | 0 | 0 | 0 | 0 | 0 | 0 | 0 | 0 | 0 | 0 | 0 | 0 | 0 |
| 60.0060 | -11.0880 | 6.2150  | H | 0 | 0 | 0 | 0 | 0 | 0 | 0 | 0 | 0 | 0 | 0 | 0 | 0 | 0 | 0 | 0 |
| 60.3160 | -12.7590 | 6.7600  | H | 0 | 0 | 0 | 0 | 0 | 0 | 0 | 0 | 0 | 0 | 0 | 0 | 0 | 0 | 0 | 0 |
| 61.1830 | -12.2620 | 4.8270  | C | 0 | 0 | 0 | 0 | 0 | 0 | 0 | 0 | 0 | 0 | 0 | 0 | 0 | 0 | 0 | 0 |
| 61.2330 | -13.2880 | 4.4430  | H | 0 | 0 | 0 | 0 | 0 | 0 | 0 | 0 | 0 | 0 | 0 | 0 | 0 | 0 | 0 | 0 |
| 60.9140 | -11.6360 | 3.9670  | H | 0 | 0 | 0 | 0 | 0 | 0 | 0 | 0 | 0 | 0 | 0 | 0 | 0 | 0 | 0 | 0 |
| 51.9300 | -14.5620 | 5.7640  | O | 0 | 0 | 0 | 0 | 0 | 0 | 0 | 0 | 0 | 0 | 0 | 0 | 0 | 0 | 0 | 0 |
| 58.5530 | -12.9930 | 4.2220  | O | 0 | 0 | 0 | 0 | 0 | 0 | 0 | 0 | 0 | 0 | 0 | 0 | 0 | 0 | 0 | 0 |
| 55.1450 | -11.4030 | 7.6110  | C | 0 | 0 | 0 | 0 | 0 | 0 | 0 | 0 | 0 | 0 | 0 | 0 | 0 | 0 | 0 | 0 |
| 54.6680 | -10.8730 | 6.7760  | H | 0 | 0 | 0 | 0 | 0 | 0 | 0 | 0 | 0 | 0 | 0 | 0 | 0 | 0 | 0 | 0 |
| 54.3850 | -11.4660 | 8.4010  | H | 0 | 0 | 0 | 0 | 0 | 0 | 0 | 0 | 0 | 0 | 0 | 0 | 0 | 0 | 0 | 0 |
| 56.1600 | -13.6240 | 8.3450  | C | 0 | 0 | 0 | 0 | 0 | 0 | 0 | 0 | 0 | 0 | 0 | 0 | 0 | 0 | 0 | 0 |
| 57.1080 | -13.1800 | 8.6630  | H | 0 | 0 | 0 | 0 | 0 | 0 | 0 | 0 | 0 | 0 | 0 | 0 | 0 | 0 | 0 | 0 |
| 55.4760 | -13.6170 | 9.2030  | H | 0 | 0 | 0 | 0 | 0 | 0 | 0 | 0 | 0 | 0 | 0 | 0 | 0 | 0 | 0 | 0 |
| 56.2750 | -10.5200 | 8.1250  | C | 0 | 0 | 0 | 0 | 0 | 0 | 0 | 0 | 0 | 0 | 0 | 0 | 0 | 0 | 0 | 0 |
| 57.0060 | -10.3000 | 7.3430  | H | 0 | 0 | 0 | 0 | 0 | 0 | 0 | 0 | 0 | 0 | 0 | 0 | 0 | 0 | 0 | 0 |
| 56.7920 | -10.9690 | 8.9780  | H | 0 | 0 | 0 | 0 | 0 | 0 | 0 | 0 | 0 | 0 | 0 | 0 | 0 | 0 | 0 | 0 |
| 55.8670 | -9.5600  | 8.4610  | H | 0 | 0 | 0 | 0 | 0 | 0 | 0 | 0 | 0 | 0 | 0 | 0 | 0 | 0 | 0 | 0 |
| 56.4410 | -14.9690 | 7.9200  | O | 0 | 0 | 0 | 0 | 0 | 0 | 0 | 0 | 0 | 0 | 0 | 0 | 0 | 0 | 0 | 0 |
| 56.3610 | -15.9400 | 8.8630  | C | 0 | 0 | 0 | 0 | 0 | 0 | 0 | 0 | 0 | 0 | 0 | 0 | 0 | 0 | 0 | 0 |
| 56.0950 | -15.7810 | 10.0450 | O | 0 | 0 | 0 | 0 | 0 | 0 | 0 | 0 | 0 | 0 | 0 | 0 | 0 | 0 | 0 | 0 |
| 67.0440 | -13.7320 | 8.9720  | O | 0 | 0 | 0 | 0 | 0 | 0 | 0 | 0 | 0 | 0 | 0 | 0 | 0 | 0 | 0 | 0 |
| 67.9290 | -13.4200 | 9.2270  | H | 0 | 0 | 0 | 0 | 0 | 0 | 0 | 0 | 0 | 0 | 0 | 0 | 0 | 0 | 0 | 0 |
| 66.5240 | -12.7960 | 8.0390  | C | 0 | 0 | 0 | 0 | 0 | 0 | 0 | 0 | 0 | 0 | 0 | 0 | 0 | 0 | 0 | 0 |
| 66.4750 | -11.8150 | 8.5210  | H | 0 | 0 | 0 | 0 | 0 | 0 | 0 | 0 | 0 | 0 | 0 | 0 | 0 | 0 | 0 | 0 |
| 67.2030 | -12.7410 | 7.1830  | H | 0 | 0 | 0 | 0 | 0 | 0 | 0 | 0 | 0 | 0 | 0 | 0 | 0 | 0 | 0 | 0 |
| 65.1430 | -13.2630 | 7.6110  | C | 0 | 0 | 0 | 0 | 0 | 0 | 0 | 0 | 0 | 0 | 0 | 0 | 0 | 0 | 0 | 0 |
| 65.2180 | -14.2650 | 7.1700  | H | 0 | 0 | 0 | 0 | 0 | 0 | 0 | 0 | 0 | 0 | 0 | 0 | 0 | 0 | 0 | 0 |
| 64.5070 | -13.3740 | 8.4980  | H | 0 | 0 | 0 | 0 | 0 | 0 | 0 | 0 | 0 | 0 | 0 | 0 | 0 | 0 | 0 | 0 |
| 64.5030 | -12.2950 | 6.6190  | C | 0 | 0 | 0 | 0 | 0 | 0 | 0 | 0 | 0 | 0 | 0 | 0 | 0 | 0 | 0 | 0 |
| 64.4370 | -11.2980 | 7.0730  | H | 0 | 0 | 0 | 0 | 0 | 0 | 0 | 0 | 0 | 0 | 0 | 0 | 0 | 0 | 0 | 0 |
| 65.1380 | -12.2050 | 5.7290  | H | 0 | 0 | 0 | 0 | 0 | 0 | 0 | 0 | 0 | 0 | 0 | 0 | 0 | 0 | 0 | 0 |
| 63.1090 | -12.7790 | 6.2190  | C | 0 | 0 | 0 | 0 | 0 | 0 | 0 | 0 | 0 | 0 | 0 | 0 | 0 | 0 | 0 | 0 |
| 63.1900 | -13.7660 | 5.7480  | H | 0 | 0 | 0 | 0 | 0 | 0 | 0 | 0 | 0 | 0 | 0 | 0 | 0 | 0 | 0 | 0 |
| 62.4980 | -12.8830 | 7.1220  | H | 0 | 0 | 0 | 0 | 0 | 0 | 0 | 0 | 0 | 0 | 0 | 0 | 0 | 0 | 0 | 0 |
| 62.5060 | -11.8270 | 5.2870  | N | 0 | 0 | 3 | 0 | 0 | 0 | 0 | 0 | 0 | 0 | 0 | 0 | 0 | 0 | 0 | 0 |
| 62.4390 | -10.9080 | 5.7220  | H | 0 | 0 | 0 | 0 | 0 | 0 | 0 | 0 | 0 | 0 | 0 | 0 | 0 | 0 | 0 | 0 |
| 1       | 2        | 1       | 0 | 0 | 0 | 0 | 0 | 0 | 0 | 0 | 0 | 0 | 0 | 0 | 0 | 0 | 0 | 0 | 0 |
| 1       | 3        | 1       | 0 | 0 | 0 | 0 | 0 | 0 | 0 | 0 | 0 | 0 | 0 | 0 | 0 | 0 | 0 | 0 | 0 |
| 3       | 4        | 1       | 0 | 0 | 0 | 0 | 0 | 0 | 0 | 0 | 0 | 0 | 0 | 0 | 0 | 0 | 0 | 0 | 0 |
| 3       | 5        | 1       | 0 | 0 | 0 | 0 | 0 | 0 | 0 | 0 | 0 | 0 | 0 | 0 | 0 | 0 | 0 | 0 | 0 |
| 3       | 6        | 1       | 0 | 0 | 0 | 0 | 0 | 0 | 0 | 0 | 0 | 0 | 0 | 0 | 0 | 0 | 0 | 0 | 0 |
| 6       | 7        | 1       | 0 | 0 | 0 | 0 | 0 | 0 | 0 | 0 | 0 | 0 | 0 | 0 | 0 | 0 | 0 | 0 | 0 |

|    |     |   |   |   |   |   |
|----|-----|---|---|---|---|---|
| 6  | 8   | 1 | 0 | 0 | 0 | 0 |
| 6  | 9   | 1 | 0 | 0 | 0 | 0 |
| 9  | 10  | 1 | 0 | 0 | 0 | 0 |
| 9  | 11  | 1 | 0 | 0 | 0 | 0 |
| 9  | 12  | 1 | 0 | 0 | 0 | 0 |
| 12 | 13  | 1 | 0 | 0 | 0 | 0 |
| 12 | 14  | 1 | 0 | 0 | 0 | 0 |
| 12 | 15  | 1 | 0 | 0 | 0 | 0 |
| 15 | 16  | 1 | 0 | 0 | 0 | 0 |
| 15 | 28  | 1 | 0 | 0 | 0 | 0 |
| 17 | 18  | 1 | 0 | 0 | 0 | 0 |
| 17 | 26  | 2 | 0 | 0 | 0 | 0 |
| 17 | 64  | 1 | 0 | 0 | 0 | 0 |
| 18 | 19  | 1 | 0 | 0 | 0 | 0 |
| 18 | 20  | 2 | 0 | 0 | 0 | 0 |
| 20 | 21  | 1 | 0 | 0 | 0 | 0 |
| 20 | 22  | 1 | 0 | 0 | 0 | 0 |
| 22 | 23  | 1 | 0 | 0 | 0 | 0 |
| 22 | 24  | 2 | 0 | 0 | 0 | 0 |
| 24 | 25  | 1 | 0 | 0 | 0 | 0 |
| 24 | 26  | 1 | 0 | 0 | 0 | 0 |
| 26 | 27  | 1 | 0 | 0 | 0 | 0 |
| 28 | 29  | 1 | 0 | 0 | 0 | 0 |
| 28 | 30  | 1 | 0 | 0 | 0 | 0 |
| 28 | 31  | 1 | 0 | 0 | 0 | 0 |
| 31 | 32  | 1 | 0 | 0 | 0 | 0 |
| 31 | 33  | 1 | 0 | 0 | 0 | 0 |
| 31 | 34  | 1 | 0 | 0 | 0 | 0 |
| 34 | 35  | 1 | 0 | 0 | 0 | 0 |
| 34 | 51  | 2 | 0 | 0 | 0 | 0 |
| 35 | 36  | 1 | 0 | 0 | 0 | 0 |
| 36 | 37  | 1 | 0 | 0 | 0 | 0 |
| 36 | 38  | 1 | 0 | 0 | 0 | 0 |
| 36 | 39  | 1 | 0 | 0 | 0 | 0 |
| 39 | 40  | 1 | 0 | 0 | 0 | 0 |
| 39 | 53  | 1 | 0 | 0 | 0 | 0 |
| 39 | 56  | 1 | 0 | 0 | 0 | 0 |
| 40 | 41  | 1 | 0 | 0 | 0 | 0 |
| 40 | 42  | 1 | 0 | 0 | 0 | 0 |
| 40 | 43  | 1 | 0 | 0 | 0 | 0 |
| 43 | 44  | 1 | 0 | 0 | 0 | 0 |
| 44 | 45  | 1 | 0 | 0 | 0 | 0 |
| 44 | 52  | 2 | 0 | 0 | 0 | 0 |
| 45 | 46  | 1 | 0 | 0 | 0 | 0 |
| 45 | 47  | 1 | 0 | 0 | 0 | 0 |
| 45 | 48  | 1 | 0 | 0 | 0 | 0 |
| 48 | 49  | 1 | 0 | 0 | 0 | 0 |
| 48 | 50  | 1 | 0 | 0 | 0 | 0 |
| 48 | 80  | 1 | 0 | 0 | 0 | 0 |
| 53 | 54  | 1 | 0 | 0 | 0 | 0 |
| 53 | 55  | 1 | 0 | 0 | 0 | 0 |
| 53 | 59  | 1 | 0 | 0 | 0 | 0 |
| 56 | 57  | 1 | 0 | 0 | 0 | 0 |
| 56 | 58  | 1 | 0 | 0 | 0 | 0 |
| 56 | 63  | 1 | 0 | 0 | 0 | 0 |
| 59 | 60  | 1 | 0 | 0 | 0 | 0 |
| 59 | 61  | 1 | 0 | 0 | 0 | 0 |
| 59 | 62  | 1 | 0 | 0 | 0 | 0 |
| 63 | 64  | 1 | 0 | 0 | 0 | 0 |
| 64 | 65  | 2 | 0 | 0 | 0 | 0 |
| 66 | 67  | 1 | 0 | 0 | 0 | 0 |
| 66 | 68  | 1 | 0 | 0 | 0 | 0 |
| 68 | 69  | 1 | 0 | 0 | 0 | 0 |
| 68 | 70  | 1 | 0 | 0 | 0 | 0 |
| 68 | 71  | 1 | 0 | 0 | 0 | 0 |
| 71 | 72  | 1 | 0 | 0 | 0 | 0 |
| 71 | 73  | 1 | 0 | 0 | 0 | 0 |
| 71 | 74  | 1 | 0 | 0 | 0 | 0 |
| 74 | 75  | 1 | 0 | 0 | 0 | 0 |
| 74 | 76  | 1 | 0 | 0 | 0 | 0 |
| 74 | 77  | 1 | 0 | 0 | 0 | 0 |
| 77 | 78  | 1 | 0 | 0 | 0 | 0 |
| 77 | 79  | 1 | 0 | 0 | 0 | 0 |
| 77 | 80  | 1 | 0 | 0 | 0 | 0 |
| 80 | 92  | 1 | 0 | 0 | 0 | 0 |
| 81 | 82  | 1 | 0 | 0 | 0 | 0 |
| 81 | 90  | 2 | 0 | 0 | 0 | 0 |
| 81 | 128 | 1 | 0 | 0 | 0 | 0 |
| 82 | 83  | 1 | 0 | 0 | 0 | 0 |
| 82 | 84  | 2 | 0 | 0 | 0 | 0 |
| 84 | 85  | 1 | 0 | 0 | 0 | 0 |

|     |     |   |   |   |   |   |
|-----|-----|---|---|---|---|---|
| 84  | 86  | 1 | 0 | 0 | 0 | 0 |
| 86  | 87  | 1 | 0 | 0 | 0 | 0 |
| 86  | 88  | 2 | 0 | 0 | 0 | 0 |
| 88  | 89  | 1 | 0 | 0 | 0 | 0 |
| 88  | 90  | 1 | 0 | 0 | 0 | 0 |
| 90  | 91  | 1 | 0 | 0 | 0 | 0 |
| 92  | 93  | 1 | 0 | 0 | 0 | 0 |
| 92  | 94  | 1 | 0 | 0 | 0 | 0 |
| 92  | 95  | 1 | 0 | 0 | 0 | 0 |
| 95  | 96  | 1 | 0 | 0 | 0 | 0 |
| 95  | 97  | 1 | 0 | 0 | 0 | 0 |
| 95  | 98  | 1 | 0 | 0 | 0 | 0 |
| 98  | 99  | 1 | 0 | 0 | 0 | 0 |
| 98  | 115 | 2 | 0 | 0 | 0 | 0 |
| 99  | 100 | 1 | 0 | 0 | 0 | 0 |
| 100 | 101 | 1 | 0 | 0 | 0 | 0 |
| 100 | 102 | 1 | 0 | 0 | 0 | 0 |
| 100 | 103 | 1 | 0 | 0 | 0 | 0 |
| 103 | 104 | 1 | 0 | 0 | 0 | 0 |
| 103 | 117 | 1 | 0 | 0 | 0 | 0 |
| 103 | 120 | 1 | 0 | 0 | 0 | 0 |
| 104 | 105 | 1 | 0 | 0 | 0 | 0 |
| 104 | 106 | 1 | 0 | 0 | 0 | 0 |
| 104 | 107 | 1 | 0 | 0 | 0 | 0 |
| 107 | 108 | 1 | 0 | 0 | 0 | 0 |
| 108 | 109 | 1 | 0 | 0 | 0 | 0 |
| 108 | 116 | 2 | 0 | 0 | 0 | 0 |
| 109 | 110 | 1 | 0 | 0 | 0 | 0 |
| 109 | 111 | 1 | 0 | 0 | 0 | 0 |
| 109 | 112 | 1 | 0 | 0 | 0 | 0 |
| 112 | 113 | 1 | 0 | 0 | 0 | 0 |
| 112 | 114 | 1 | 0 | 0 | 0 | 0 |
| 112 | 144 | 1 | 0 | 0 | 0 | 0 |
| 117 | 118 | 1 | 0 | 0 | 0 | 0 |
| 117 | 119 | 1 | 0 | 0 | 0 | 0 |
| 117 | 123 | 1 | 0 | 0 | 0 | 0 |
| 120 | 121 | 1 | 0 | 0 | 0 | 0 |
| 120 | 122 | 1 | 0 | 0 | 0 | 0 |
| 120 | 127 | 1 | 0 | 0 | 0 | 0 |
| 123 | 124 | 1 | 0 | 0 | 0 | 0 |
| 123 | 125 | 1 | 0 | 0 | 0 | 0 |
| 123 | 126 | 1 | 0 | 0 | 0 | 0 |
| 127 | 128 | 1 | 0 | 0 | 0 | 0 |
| 128 | 129 | 2 | 0 | 0 | 0 | 0 |
| 130 | 131 | 1 | 0 | 0 | 0 | 0 |
| 130 | 132 | 1 | 0 | 0 | 0 | 0 |
| 132 | 133 | 1 | 0 | 0 | 0 | 0 |
| 132 | 134 | 1 | 0 | 0 | 0 | 0 |
| 132 | 135 | 1 | 0 | 0 | 0 | 0 |
| 135 | 136 | 1 | 0 | 0 | 0 | 0 |
| 135 | 137 | 1 | 0 | 0 | 0 | 0 |
| 135 | 138 | 1 | 0 | 0 | 0 | 0 |
| 138 | 139 | 1 | 0 | 0 | 0 | 0 |
| 138 | 140 | 1 | 0 | 0 | 0 | 0 |
| 138 | 141 | 1 | 0 | 0 | 0 | 0 |
| 141 | 142 | 1 | 0 | 0 | 0 | 0 |
| 141 | 143 | 1 | 0 | 0 | 0 | 0 |
| 141 | 144 | 1 | 0 | 0 | 0 | 0 |
| 144 | 156 | 1 | 0 | 0 | 0 | 0 |
| 145 | 146 | 1 | 0 | 0 | 0 | 0 |
| 145 | 154 | 2 | 0 | 0 | 0 | 0 |
| 145 | 192 | 1 | 0 | 0 | 0 | 0 |
| 146 | 147 | 1 | 0 | 0 | 0 | 0 |
| 146 | 148 | 2 | 0 | 0 | 0 | 0 |
| 148 | 149 | 1 | 0 | 0 | 0 | 0 |
| 148 | 150 | 1 | 0 | 0 | 0 | 0 |
| 150 | 151 | 1 | 0 | 0 | 0 | 0 |
| 150 | 152 | 2 | 0 | 0 | 0 | 0 |
| 152 | 153 | 1 | 0 | 0 | 0 | 0 |
| 152 | 154 | 1 | 0 | 0 | 0 | 0 |
| 154 | 155 | 1 | 0 | 0 | 0 | 0 |
| 156 | 157 | 1 | 0 | 0 | 0 | 0 |
| 156 | 158 | 1 | 0 | 0 | 0 | 0 |
| 156 | 159 | 1 | 0 | 0 | 0 | 0 |
| 159 | 160 | 1 | 0 | 0 | 0 | 0 |
| 159 | 161 | 1 | 0 | 0 | 0 | 0 |
| 159 | 162 | 1 | 0 | 0 | 0 | 0 |
| 162 | 163 | 1 | 0 | 0 | 0 | 0 |
| 162 | 179 | 2 | 0 | 0 | 0 | 0 |
| 163 | 164 | 1 | 0 | 0 | 0 | 0 |
| 164 | 165 | 1 | 0 | 0 | 0 | 0 |

|        |   |   |   |   |   |
|--------|---|---|---|---|---|
| 164166 | 1 | 0 | 0 | 0 | 0 |
| 164167 | 1 | 0 | 0 | 0 | 0 |
| 167168 | 1 | 0 | 0 | 0 | 0 |
| 167181 | 1 | 0 | 0 | 0 | 0 |
| 167184 | 1 | 0 | 0 | 0 | 0 |
| 168169 | 1 | 0 | 0 | 0 | 0 |
| 168170 | 1 | 0 | 0 | 0 | 0 |
| 168171 | 1 | 0 | 0 | 0 | 0 |
| 171172 | 1 | 0 | 0 | 0 | 0 |
| 172173 | 1 | 0 | 0 | 0 | 0 |
| 172180 | 2 | 0 | 0 | 0 | 0 |
| 173174 | 1 | 0 | 0 | 0 | 0 |
| 173175 | 1 | 0 | 0 | 0 | 0 |
| 173176 | 1 | 0 | 0 | 0 | 0 |
| 176177 | 1 | 0 | 0 | 0 | 0 |
| 176178 | 1 | 0 | 0 | 0 | 0 |
| 176208 | 1 | 0 | 0 | 0 | 0 |
| 181182 | 1 | 0 | 0 | 0 | 0 |
| 181183 | 1 | 0 | 0 | 0 | 0 |
| 181187 | 1 | 0 | 0 | 0 | 0 |
| 184185 | 1 | 0 | 0 | 0 | 0 |
| 184186 | 1 | 0 | 0 | 0 | 0 |
| 184191 | 1 | 0 | 0 | 0 | 0 |
| 187188 | 1 | 0 | 0 | 0 | 0 |
| 187189 | 1 | 0 | 0 | 0 | 0 |
| 187190 | 1 | 0 | 0 | 0 | 0 |
| 191192 | 1 | 0 | 0 | 0 | 0 |
| 192193 | 2 | 0 | 0 | 0 | 0 |
| 194195 | 1 | 0 | 0 | 0 | 0 |
| 194196 | 1 | 0 | 0 | 0 | 0 |
| 196197 | 1 | 0 | 0 | 0 | 0 |
| 196198 | 1 | 0 | 0 | 0 | 0 |
| 196199 | 1 | 0 | 0 | 0 | 0 |
| 199200 | 1 | 0 | 0 | 0 | 0 |
| 199201 | 1 | 0 | 0 | 0 | 0 |
| 199202 | 1 | 0 | 0 | 0 | 0 |
| 202203 | 1 | 0 | 0 | 0 | 0 |
| 202204 | 1 | 0 | 0 | 0 | 0 |
| 202205 | 1 | 0 | 0 | 0 | 0 |
| 205206 | 1 | 0 | 0 | 0 | 0 |
| 205207 | 1 | 0 | 0 | 0 | 0 |
| 205208 | 1 | 0 | 0 | 0 | 0 |
| 208220 | 1 | 0 | 0 | 0 | 0 |
| 209210 | 1 | 0 | 0 | 0 | 0 |
| 209218 | 2 | 0 | 0 | 0 | 0 |
| 209256 | 1 | 0 | 0 | 0 | 0 |
| 210211 | 1 | 0 | 0 | 0 | 0 |
| 210212 | 2 | 0 | 0 | 0 | 0 |
| 212213 | 1 | 0 | 0 | 0 | 0 |
| 212214 | 1 | 0 | 0 | 0 | 0 |
| 214215 | 1 | 0 | 0 | 0 | 0 |
| 214216 | 2 | 0 | 0 | 0 | 0 |
| 216217 | 1 | 0 | 0 | 0 | 0 |
| 216218 | 1 | 0 | 0 | 0 | 0 |
| 218219 | 1 | 0 | 0 | 0 | 0 |
| 220221 | 1 | 0 | 0 | 0 | 0 |
| 220222 | 1 | 0 | 0 | 0 | 0 |
| 220223 | 1 | 0 | 0 | 0 | 0 |
| 223224 | 1 | 0 | 0 | 0 | 0 |
| 223225 | 1 | 0 | 0 | 0 | 0 |
| 223226 | 1 | 0 | 0 | 0 | 0 |
| 226227 | 1 | 0 | 0 | 0 | 0 |
| 226243 | 2 | 0 | 0 | 0 | 0 |
| 227228 | 1 | 0 | 0 | 0 | 0 |
| 228229 | 1 | 0 | 0 | 0 | 0 |
| 228230 | 1 | 0 | 0 | 0 | 0 |
| 228231 | 1 | 0 | 0 | 0 | 0 |
| 231232 | 1 | 0 | 0 | 0 | 0 |
| 231245 | 1 | 0 | 0 | 0 | 0 |
| 231248 | 1 | 0 | 0 | 0 | 0 |
| 232233 | 1 | 0 | 0 | 0 | 0 |
| 232234 | 1 | 0 | 0 | 0 | 0 |
| 232235 | 1 | 0 | 0 | 0 | 0 |
| 235236 | 1 | 0 | 0 | 0 | 0 |
| 236237 | 1 | 0 | 0 | 0 | 0 |
| 236244 | 2 | 0 | 0 | 0 | 0 |
| 237238 | 1 | 0 | 0 | 0 | 0 |
| 237239 | 1 | 0 | 0 | 0 | 0 |
| 237240 | 1 | 0 | 0 | 0 | 0 |
| 240241 | 1 | 0 | 0 | 0 | 0 |
| 240242 | 1 | 0 | 0 | 0 | 0 |



|        |   |   |   |   |   |
|--------|---|---|---|---|---|
| 240272 | 1 | 0 | 0 | 0 | 0 |
| 245246 | 1 | 0 | 0 | 0 | 0 |
| 245247 | 1 | 0 | 0 | 0 | 0 |
| 245251 | 1 | 0 | 0 | 0 | 0 |
| 248249 | 1 | 0 | 0 | 0 | 0 |
| 248250 | 1 | 0 | 0 | 0 | 0 |
| 248255 | 1 | 0 | 0 | 0 | 0 |
| 251252 | 1 | 0 | 0 | 0 | 0 |
| 251253 | 1 | 0 | 0 | 0 | 0 |
| 251254 | 1 | 0 | 0 | 0 | 0 |
| 255256 | 1 | 0 | 0 | 0 | 0 |
| 256257 | 2 | 0 | 0 | 0 | 0 |
| 258259 | 1 | 0 | 0 | 0 | 0 |
| 258260 | 1 | 0 | 0 | 0 | 0 |
| 260261 | 1 | 0 | 0 | 0 | 0 |
| 260262 | 1 | 0 | 0 | 0 | 0 |
| 260263 | 1 | 0 | 0 | 0 | 0 |
| 263264 | 1 | 0 | 0 | 0 | 0 |
| 263265 | 1 | 0 | 0 | 0 | 0 |
| 263266 | 1 | 0 | 0 | 0 | 0 |
| 266267 | 1 | 0 | 0 | 0 | 0 |
| 266268 | 1 | 0 | 0 | 0 | 0 |
| 266269 | 1 | 0 | 0 | 0 | 0 |
| 269270 | 1 | 0 | 0 | 0 | 0 |
| 269271 | 1 | 0 | 0 | 0 | 0 |
| 269272 | 1 | 0 | 0 | 0 | 0 |
| 272284 | 1 | 0 | 0 | 0 | 0 |
| 273274 | 1 | 0 | 0 | 0 | 0 |
| 273282 | 2 | 0 | 0 | 0 | 0 |
| 273320 | 1 | 0 | 0 | 0 | 0 |
| 274275 | 1 | 0 | 0 | 0 | 0 |
| 274276 | 2 | 0 | 0 | 0 | 0 |
| 276277 | 1 | 0 | 0 | 0 | 0 |
| 276278 | 1 | 0 | 0 | 0 | 0 |
| 278279 | 1 | 0 | 0 | 0 | 0 |
| 278280 | 2 | 0 | 0 | 0 | 0 |
| 280281 | 1 | 0 | 0 | 0 | 0 |
| 280282 | 1 | 0 | 0 | 0 | 0 |
| 282283 | 1 | 0 | 0 | 0 | 0 |
| 284285 | 1 | 0 | 0 | 0 | 0 |
| 284286 | 1 | 0 | 0 | 0 | 0 |
| 284287 | 1 | 0 | 0 | 0 | 0 |
| 287288 | 1 | 0 | 0 | 0 | 0 |
| 287289 | 1 | 0 | 0 | 0 | 0 |
| 287290 | 1 | 0 | 0 | 0 | 0 |
| 290291 | 1 | 0 | 0 | 0 | 0 |
| 290307 | 2 | 0 | 0 | 0 | 0 |
| 291292 | 1 | 0 | 0 | 0 | 0 |
| 292293 | 1 | 0 | 0 | 0 | 0 |
| 292294 | 1 | 0 | 0 | 0 | 0 |
| 292295 | 1 | 0 | 0 | 0 | 0 |
| 295296 | 1 | 0 | 0 | 0 | 0 |
| 295309 | 1 | 0 | 0 | 0 | 0 |
| 295312 | 1 | 0 | 0 | 0 | 0 |
| 296297 | 1 | 0 | 0 | 0 | 0 |
| 296298 | 1 | 0 | 0 | 0 | 0 |
| 296299 | 1 | 0 | 0 | 0 | 0 |
| 299300 | 1 | 0 | 0 | 0 | 0 |
| 300301 | 1 | 0 | 0 | 0 | 0 |
| 300308 | 2 | 0 | 0 | 0 | 0 |
| 301302 | 1 | 0 | 0 | 0 | 0 |
| 301303 | 1 | 0 | 0 | 0 | 0 |
| 301304 | 1 | 0 | 0 | 0 | 0 |
| 304305 | 1 | 0 | 0 | 0 | 0 |
| 304306 | 1 | 0 | 0 | 0 | 0 |
| 304336 | 1 | 0 | 0 | 0 | 0 |
| 309310 | 1 | 0 | 0 | 0 | 0 |
| 309311 | 1 | 0 | 0 | 0 | 0 |
| 309315 | 1 | 0 | 0 | 0 | 0 |
| 312313 | 1 | 0 | 0 | 0 | 0 |
| 312314 | 1 | 0 | 0 | 0 | 0 |
| 312319 | 1 | 0 | 0 | 0 | 0 |
| 315316 | 1 | 0 | 0 | 0 | 0 |
| 315317 | 1 | 0 | 0 | 0 | 0 |
| 315318 | 1 | 0 | 0 | 0 | 0 |
| 319320 | 1 | 0 | 0 | 0 | 0 |
| 320321 | 2 | 0 | 0 | 0 | 0 |
| 322323 | 1 | 0 | 0 | 0 | 0 |
| 322324 | 1 | 0 | 0 | 0 | 0 |
| 324325 | 1 | 0 | 0 | 0 | 0 |
| 324326 | 1 | 0 | 0 | 0 | 0 |

324327 1 0 0 0 0  
327328 1 0 0 0 0  
327329 1 0 0 0 0  
327330 1 0 0 0 0  
330331 1 0 0 0 0  
330332 1 0 0 0 0  
330333 1 0 0 0 0  
333334 1 0 0 0 0  
333335 1 0 0 0 0  
333336 1 0 0 0 0  
336337 1 0 0 0 0

M END  
> <NAME>  
AA28\_12

\$\$\$  
AA36\_12  
MOE2012 3D

373377 0 0 1 0 0 0 0 0999 V2000  
36.8500 -21.7820 21.8410 O 0 0 0 0 0 0 0 0 0 0 0 0 0 0 0  
37.3650 -21.1520 22.3730 H 0 0 0 0 0 0 0 0 0 0 0 0 0 0 0  
35.9170 -21.0210 21.0850 C 0 0 0 0 0 0 0 0 0 0 0 0 0 0 0  
35.2870 -20.4550 21.7790 H 0 0 0 0 0 0 0 0 0 0 0 0 0 0 0  
36.4720 -20.3190 20.4540 H 0 0 0 0 0 0 0 0 0 0 0 0 0 0 0  
35.0760 -21.9650 20.2360 C 0 0 0 0 0 0 0 0 0 0 0 0 0 0 0  
35.7350 -22.5600 19.5910 H 0 0 0 0 0 0 0 0 0 0 0 0 0 0 0  
34.5670 -22.6850 20.8890 H 0 0 0 0 0 0 0 0 0 0 0 0 0 0 0  
34.0550 -21.2050 19.3890 C 0 0 0 0 0 0 0 0 0 0 0 0 0 0 0  
33.4030 -20.6140 20.0440 H 0 0 0 0 0 0 0 0 0 0 0 0 0 0 0  
34.5770 -20.5000 18.7310 H 0 0 0 0 0 0 0 0 0 0 0 0 0 0 0  
33.2030 -22.1580 18.5460 C 0 0 0 0 0 0 0 0 0 0 0 0 0 0 0  
33.8520 -22.7500 17.8900 H 0 0 0 0 0 0 0 0 0 0 0 0 0 0 0  
32.6800 -22.8620 19.2050 H 0 0 0 0 0 0 0 0 0 0 0 0 0 0 0  
32.1810 -21.3920 17.7000 C 0 0 0 0 0 0 0 0 0 0 0 0 0 0 0  
31.5420 -20.7890 18.3580 H 0 0 0 0 0 0 0 0 0 0 0 0 0 0 0  
32.7080 -20.6970 17.0350 H 0 0 0 0 0 0 0 0 0 0 0 0 0 0 0  
31.3130 -22.3470 16.8730 C 0 0 0 0 0 0 0 0 0 0 0 0 0 0 0  
31.9510 -22.9340 16.2030 H 0 0 0 0 0 0 0 0 0 0 0 0 0 0 0  
30.8040 -23.0360 17.5550 H 0 0 0 0 0 0 0 0 0 0 0 0 0 0 0  
30.3350 -21.5760 16.0980 N 0 0 3 0 0 0 0 0 0 0 0 0 0 0 0  
30.8390 -20.8800 15.5460 H 0 0 0 0 0 0 0 0 0 0 0 0 0 0 0  
23.2860 -18.6450 19.8810 C 0 0 0 0 0 0 0 0 0 0 0 0 0 0 0  
24.6680 -18.4680 20.0310 C 0 0 0 0 0 0 0 0 0 0 0 0 0 0 0  
25.3720 -18.8930 19.3200 H 0 0 0 0 0 0 0 0 0 0 0 0 0 0 0  
25.1680 -17.7360 21.1100 C 0 0 0 0 0 0 0 0 0 0 0 0 0 0 0  
26.2410 -17.5980 21.2220 H 0 0 0 0 0 0 0 0 0 0 0 0 0 0 0  
24.2940 -17.1800 22.0420 C 0 0 0 0 0 0 0 0 0 0 0 0 0 0 0  
24.6850 -16.6100 22.8810 H 0 0 0 0 0 0 0 0 0 0 0 0 0 0 0  
22.9180 -17.3550 21.9000 C 0 0 0 0 0 0 0 0 0 0 0 0 0 0 0  
22.2380 -16.9240 22.6300 H 0 0 0 0 0 0 0 0 0 0 0 0 0 0 0  
22.4140 -18.0860 20.8240 C 0 0 0 0 0 0 0 0 0 0 0 0 0 0 0  
21.3370 -18.2140 20.7260 H 0 0 0 0 0 0 0 0 0 0 0 0 0 0 0  
29.5290 -22.4010 15.1940 C 0 0 0 0 0 0 0 0 0 0 0 0 0 0 0  
30.1860 -22.9140 14.4810 H 0 0 0 0 0 0 0 0 0 0 0 0 0 0 0  
28.9040 -21.7210 14.6020 H 0 0 0 0 0 0 0 0 0 0 0 0 0 0 0  
28.6280 -23.4260 15.8760 C 0 0 0 0 0 0 0 0 0 0 0 0 0 0 0  
28.0830 -24.0070 15.1220 H 0 0 0 0 0 0 0 0 0 0 0 0 0 0 0  
29.2080 -24.1590 16.4480 H 0 0 0 0 0 0 0 0 0 0 0 0 0 0 0  
27.6150 -22.7940 16.7940 C 0 0 0 0 0 0 0 0 0 0 0 0 0 0 0  
26.6360 -22.1780 16.0700 O 0 0 0 0 0 0 0 0 0 0 0 0 0 0 0  
25.5500 -21.6580 16.8550 C 0 0 0 0 0 0 0 0 0 0 0 0 0 0 0  
25.1240 -22.4770 17.4490 H 0 0 0 0 0 0 0 0 0 0 0 0 0 0 0  
25.9490 -20.9010 17.5420 H 0 0 0 0 0 0 0 0 0 0 0 0 0 0 0  
24.4440 -21.0490 15.9430 C 0 0 3 0 0 0 0 0 0 0 0 0 0 0 0  
25.0350 -19.7910 15.2560 C 0 0 0 0 0 0 0 0 0 0 0 0 0 0 0  
25.4960 -19.1350 16.0050 H 0 0 0 0 0 0 0 0 0 0 0 0 0 0 0  
25.8020 -20.0770 14.5260 H 0 0 0 0 0 0 0 0 0 0 0 0 0 0 0  
24.0040 -19.0570 14.5730 O 0 0 0 0 0 0 0 0 0 0 0 0 0 0 0  
24.3810 -17.8500 14.0640 C 0 0 0 0 0 0 0 0 0 0 0 0 0 0 0  
23.2070 -17.2080 13.3640 C 0 0 0 0 0 0 0 0 0 0 0 0 0 0 0  
23.0340 -17.7650 12.4370 H 0 0 0 0 0 0 0 0 0 0 0 0 0 0 0  
22.3260 -17.3050 14.0090 H 0 0 0 0 0 0 0 0 0 0 0 0 0 0 0  
23.4760 -15.7240 13.0880 C 0 0 0 0 0 0 0 0 0 0 0 0 0 0 0  
23.7540 -15.2680 14.0470 H 0 0 0 0 0 0 0 0 0 0 0 0 0 0 0  
24.3450 -15.6110 12.4270 H 0 0 0 0 0 0 0 0 0 0 0 0 0 0 0  
27.6490 -22.8700 18.0150 O 0 0 0 0 0 0 0 0 0 0 0 0 0 0 0  
25.5030 -17.3700 14.1430 O 0 0 0 0 0 0 0 0 0 0 0 0 0 0 0  
24.0170 -22.1230 14.8960 C 0 0 0 0 0 0 0 0 0 0 0 0 0 0 0  
24.8740 -22.3790 14.2600 H 0 0 0 0 0 0 0 0 0 0 0 0 0 0 0  
23.7520 -23.0450 15.4310 H 0 0 0 0 0 0 0 0 0 0 0 0 0 0 0









|       |    |   |   |   |   |   |
|-------|----|---|---|---|---|---|
| 12    | 14 | 1 | 0 | 0 | 0 | 0 |
| 12    | 15 | 1 | 0 | 0 | 0 | 0 |
| 15    | 16 | 1 | 0 | 0 | 0 | 0 |
| 15    | 17 | 1 | 0 | 0 | 0 | 0 |
| 15    | 18 | 1 | 0 | 0 | 0 | 0 |
| 18    | 19 | 1 | 0 | 0 | 0 | 0 |
| 18    | 20 | 1 | 0 | 0 | 0 | 0 |
| 18    | 21 | 1 | 0 | 0 | 0 | 0 |
| 21    | 22 | 1 | 0 | 0 | 0 | 0 |
| 21    | 34 | 1 | 0 | 0 | 0 | 0 |
| 23    | 24 | 1 | 0 | 0 | 0 | 0 |
| 23    | 32 | 2 | 0 | 0 | 0 | 0 |
| 23    | 70 | 1 | 0 | 0 | 0 | 0 |
| 24    | 25 | 1 | 0 | 0 | 0 | 0 |
| 24    | 26 | 2 | 0 | 0 | 0 | 0 |
| 26    | 27 | 1 | 0 | 0 | 0 | 0 |
| 26    | 28 | 1 | 0 | 0 | 0 | 0 |
| 28    | 29 | 1 | 0 | 0 | 0 | 0 |
| 28    | 30 | 2 | 0 | 0 | 0 | 0 |
| 30    | 31 | 1 | 0 | 0 | 0 | 0 |
| 30    | 32 | 1 | 0 | 0 | 0 | 0 |
| 32    | 33 | 1 | 0 | 0 | 0 | 0 |
| 34    | 35 | 1 | 0 | 0 | 0 | 0 |
| 34    | 36 | 1 | 0 | 0 | 0 | 0 |
| 34    | 37 | 1 | 0 | 0 | 0 | 0 |
| 37    | 38 | 1 | 0 | 0 | 0 | 0 |
| 37    | 39 | 1 | 0 | 0 | 0 | 0 |
| 37    | 40 | 1 | 0 | 0 | 0 | 0 |
| 40    | 41 | 1 | 0 | 0 | 0 | 0 |
| 40    | 57 | 2 | 0 | 0 | 0 | 0 |
| 41    | 42 | 1 | 0 | 0 | 0 | 0 |
| 42    | 43 | 1 | 0 | 0 | 0 | 0 |
| 42    | 44 | 1 | 0 | 0 | 0 | 0 |
| 42    | 45 | 1 | 0 | 0 | 0 | 0 |
| 45    | 46 | 1 | 0 | 0 | 0 | 0 |
| 45    | 59 | 1 | 0 | 0 | 0 | 0 |
| 45    | 62 | 1 | 0 | 0 | 0 | 0 |
| 46    | 47 | 1 | 0 | 0 | 0 | 0 |
| 46    | 48 | 1 | 0 | 0 | 0 | 0 |
| 46    | 49 | 1 | 0 | 0 | 0 | 0 |
| 49    | 50 | 1 | 0 | 0 | 0 | 0 |
| 50    | 51 | 1 | 0 | 0 | 0 | 0 |
| 50    | 58 | 2 | 0 | 0 | 0 | 0 |
| 51    | 52 | 1 | 0 | 0 | 0 | 0 |
| 51    | 53 | 1 | 0 | 0 | 0 | 0 |
| 51    | 54 | 1 | 0 | 0 | 0 | 0 |
| 54    | 55 | 1 | 0 | 0 | 0 | 0 |
| 54    | 56 | 1 | 0 | 0 | 0 | 0 |
| 54    | 92 | 1 | 0 | 0 | 0 | 0 |
| 59    | 60 | 1 | 0 | 0 | 0 | 0 |
| 59    | 61 | 1 | 0 | 0 | 0 | 0 |
| 59    | 65 | 1 | 0 | 0 | 0 | 0 |
| 62    | 63 | 1 | 0 | 0 | 0 | 0 |
| 62    | 64 | 1 | 0 | 0 | 0 | 0 |
| 62    | 69 | 1 | 0 | 0 | 0 | 0 |
| 65    | 66 | 1 | 0 | 0 | 0 | 0 |
| 65    | 67 | 1 | 0 | 0 | 0 | 0 |
| 65    | 68 | 1 | 0 | 0 | 0 | 0 |
| 69    | 70 | 1 | 0 | 0 | 0 | 0 |
| 70    | 71 | 2 | 0 | 0 | 0 | 0 |
| 72    | 73 | 1 | 0 | 0 | 0 | 0 |
| 72    | 74 | 1 | 0 | 0 | 0 | 0 |
| 74    | 75 | 1 | 0 | 0 | 0 | 0 |
| 74    | 76 | 1 | 0 | 0 | 0 | 0 |
| 74    | 77 | 1 | 0 | 0 | 0 | 0 |
| 77    | 78 | 1 | 0 | 0 | 0 | 0 |
| 77    | 79 | 1 | 0 | 0 | 0 | 0 |
| 77    | 80 | 1 | 0 | 0 | 0 | 0 |
| 80    | 81 | 1 | 0 | 0 | 0 | 0 |
| 80    | 82 | 1 | 0 | 0 | 0 | 0 |
| 80    | 83 | 1 | 0 | 0 | 0 | 0 |
| 83    | 84 | 1 | 0 | 0 | 0 | 0 |
| 83    | 85 | 1 | 0 | 0 | 0 | 0 |
| 83    | 86 | 1 | 0 | 0 | 0 | 0 |
| 86    | 87 | 1 | 0 | 0 | 0 | 0 |
| 86    | 88 | 1 | 0 | 0 | 0 | 0 |
| 86    | 89 | 1 | 0 | 0 | 0 | 0 |
| 89    | 90 | 1 | 0 | 0 | 0 | 0 |
| 89    | 91 | 1 | 0 | 0 | 0 | 0 |
| 89    | 92 | 1 | 0 | 0 | 0 | 0 |
| 92104 |    | 1 | 0 | 0 | 0 | 0 |

|        |   |   |   |   |   |
|--------|---|---|---|---|---|
| 93 94  | 1 | 0 | 0 | 0 | 0 |
| 93102  | 2 | 0 | 0 | 0 | 0 |
| 93140  | 1 | 0 | 0 | 0 | 0 |
| 94 95  | 1 | 0 | 0 | 0 | 0 |
| 94 96  | 2 | 0 | 0 | 0 | 0 |
| 96 97  | 1 | 0 | 0 | 0 | 0 |
| 96 98  | 1 | 0 | 0 | 0 | 0 |
| 98 99  | 1 | 0 | 0 | 0 | 0 |
| 98100  | 2 | 0 | 0 | 0 | 0 |
| 100101 | 1 | 0 | 0 | 0 | 0 |
| 100102 | 1 | 0 | 0 | 0 | 0 |
| 102103 | 1 | 0 | 0 | 0 | 0 |
| 104105 | 1 | 0 | 0 | 0 | 0 |
| 104106 | 1 | 0 | 0 | 0 | 0 |
| 104107 | 1 | 0 | 0 | 0 | 0 |
| 107108 | 1 | 0 | 0 | 0 | 0 |
| 107109 | 1 | 0 | 0 | 0 | 0 |
| 107110 | 1 | 0 | 0 | 0 | 0 |
| 110111 | 1 | 0 | 0 | 0 | 0 |
| 110127 | 2 | 0 | 0 | 0 | 0 |
| 111112 | 1 | 0 | 0 | 0 | 0 |
| 112113 | 1 | 0 | 0 | 0 | 0 |
| 112114 | 1 | 0 | 0 | 0 | 0 |
| 112115 | 1 | 0 | 0 | 0 | 0 |
| 115116 | 1 | 0 | 0 | 0 | 0 |
| 115129 | 1 | 0 | 0 | 0 | 0 |
| 115132 | 1 | 0 | 0 | 0 | 0 |
| 116117 | 1 | 0 | 0 | 0 | 0 |
| 116118 | 1 | 0 | 0 | 0 | 0 |
| 116119 | 1 | 0 | 0 | 0 | 0 |
| 119120 | 1 | 0 | 0 | 0 | 0 |
| 120121 | 1 | 0 | 0 | 0 | 0 |
| 120128 | 2 | 0 | 0 | 0 | 0 |
| 121122 | 1 | 0 | 0 | 0 | 0 |
| 121123 | 1 | 0 | 0 | 0 | 0 |
| 121124 | 1 | 0 | 0 | 0 | 0 |
| 124125 | 1 | 0 | 0 | 0 | 0 |
| 124126 | 1 | 0 | 0 | 0 | 0 |
| 124162 | 1 | 0 | 0 | 0 | 0 |
| 129130 | 1 | 0 | 0 | 0 | 0 |
| 129131 | 1 | 0 | 0 | 0 | 0 |
| 129135 | 1 | 0 | 0 | 0 | 0 |
| 132133 | 1 | 0 | 0 | 0 | 0 |
| 132134 | 1 | 0 | 0 | 0 | 0 |
| 132139 | 1 | 0 | 0 | 0 | 0 |
| 135136 | 1 | 0 | 0 | 0 | 0 |
| 135137 | 1 | 0 | 0 | 0 | 0 |
| 135138 | 1 | 0 | 0 | 0 | 0 |
| 139140 | 1 | 0 | 0 | 0 | 0 |
| 140141 | 2 | 0 | 0 | 0 | 0 |
| 142143 | 1 | 0 | 0 | 0 | 0 |
| 142144 | 1 | 0 | 0 | 0 | 0 |
| 144145 | 1 | 0 | 0 | 0 | 0 |
| 144146 | 1 | 0 | 0 | 0 | 0 |
| 144147 | 1 | 0 | 0 | 0 | 0 |
| 147148 | 1 | 0 | 0 | 0 | 0 |
| 147149 | 1 | 0 | 0 | 0 | 0 |
| 147150 | 1 | 0 | 0 | 0 | 0 |
| 150151 | 1 | 0 | 0 | 0 | 0 |
| 150152 | 1 | 0 | 0 | 0 | 0 |
| 150153 | 1 | 0 | 0 | 0 | 0 |
| 153154 | 1 | 0 | 0 | 0 | 0 |
| 153155 | 1 | 0 | 0 | 0 | 0 |
| 153156 | 1 | 0 | 0 | 0 | 0 |
| 156157 | 1 | 0 | 0 | 0 | 0 |
| 156158 | 1 | 0 | 0 | 0 | 0 |
| 156159 | 1 | 0 | 0 | 0 | 0 |
| 159160 | 1 | 0 | 0 | 0 | 0 |
| 159161 | 1 | 0 | 0 | 0 | 0 |
| 159162 | 1 | 0 | 0 | 0 | 0 |
| 162174 | 1 | 0 | 0 | 0 | 0 |
| 163164 | 1 | 0 | 0 | 0 | 0 |
| 163172 | 2 | 0 | 0 | 0 | 0 |
| 163210 | 1 | 0 | 0 | 0 | 0 |
| 164165 | 1 | 0 | 0 | 0 | 0 |
| 164166 | 2 | 0 | 0 | 0 | 0 |
| 166167 | 1 | 0 | 0 | 0 | 0 |
| 166168 | 1 | 0 | 0 | 0 | 0 |
| 168169 | 1 | 0 | 0 | 0 | 0 |
| 168170 | 2 | 0 | 0 | 0 | 0 |
| 170171 | 1 | 0 | 0 | 0 | 0 |



|        |   |   |   |   |   |
|--------|---|---|---|---|---|
| 170172 | 1 | 0 | 0 | 0 | 0 |
| 172173 | 1 | 0 | 0 | 0 | 0 |
| 174175 | 1 | 0 | 0 | 0 | 0 |
| 174176 | 1 | 0 | 0 | 0 | 0 |
| 174177 | 1 | 0 | 0 | 0 | 0 |
| 177178 | 1 | 0 | 0 | 0 | 0 |
| 177179 | 1 | 0 | 0 | 0 | 0 |
| 177180 | 1 | 0 | 0 | 0 | 0 |
| 180181 | 1 | 0 | 0 | 0 | 0 |
| 180197 | 2 | 0 | 0 | 0 | 0 |
| 181182 | 1 | 0 | 0 | 0 | 0 |
| 182183 | 1 | 0 | 0 | 0 | 0 |
| 182184 | 1 | 0 | 0 | 0 | 0 |
| 182185 | 1 | 0 | 0 | 0 | 0 |
| 185186 | 1 | 0 | 0 | 0 | 0 |
| 185199 | 1 | 0 | 0 | 0 | 0 |
| 185202 | 1 | 0 | 0 | 0 | 0 |
| 186187 | 1 | 0 | 0 | 0 | 0 |
| 186188 | 1 | 0 | 0 | 0 | 0 |
| 186189 | 1 | 0 | 0 | 0 | 0 |
| 189190 | 1 | 0 | 0 | 0 | 0 |
| 190191 | 1 | 0 | 0 | 0 | 0 |
| 190198 | 2 | 0 | 0 | 0 | 0 |
| 191192 | 1 | 0 | 0 | 0 | 0 |
| 191193 | 1 | 0 | 0 | 0 | 0 |
| 191194 | 1 | 0 | 0 | 0 | 0 |
| 194195 | 1 | 0 | 0 | 0 | 0 |
| 194196 | 1 | 0 | 0 | 0 | 0 |
| 194232 | 1 | 0 | 0 | 0 | 0 |
| 199200 | 1 | 0 | 0 | 0 | 0 |
| 199201 | 1 | 0 | 0 | 0 | 0 |
| 199205 | 1 | 0 | 0 | 0 | 0 |
| 202203 | 1 | 0 | 0 | 0 | 0 |
| 202204 | 1 | 0 | 0 | 0 | 0 |
| 202209 | 1 | 0 | 0 | 0 | 0 |
| 205206 | 1 | 0 | 0 | 0 | 0 |
| 205207 | 1 | 0 | 0 | 0 | 0 |
| 205208 | 1 | 0 | 0 | 0 | 0 |
| 209210 | 1 | 0 | 0 | 0 | 0 |
| 210211 | 2 | 0 | 0 | 0 | 0 |
| 212213 | 1 | 0 | 0 | 0 | 0 |
| 212214 | 1 | 0 | 0 | 0 | 0 |
| 214215 | 1 | 0 | 0 | 0 | 0 |
| 214216 | 1 | 0 | 0 | 0 | 0 |
| 214217 | 1 | 0 | 0 | 0 | 0 |
| 217218 | 1 | 0 | 0 | 0 | 0 |
| 217219 | 1 | 0 | 0 | 0 | 0 |
| 217220 | 1 | 0 | 0 | 0 | 0 |
| 220221 | 1 | 0 | 0 | 0 | 0 |
| 220222 | 1 | 0 | 0 | 0 | 0 |
| 220223 | 1 | 0 | 0 | 0 | 0 |
| 223224 | 1 | 0 | 0 | 0 | 0 |
| 223225 | 1 | 0 | 0 | 0 | 0 |
| 223226 | 1 | 0 | 0 | 0 | 0 |
| 226227 | 1 | 0 | 0 | 0 | 0 |
| 226228 | 1 | 0 | 0 | 0 | 0 |
| 226229 | 1 | 0 | 0 | 0 | 0 |
| 229230 | 1 | 0 | 0 | 0 | 0 |
| 229231 | 1 | 0 | 0 | 0 | 0 |
| 229232 | 1 | 0 | 0 | 0 | 0 |
| 232244 | 1 | 0 | 0 | 0 | 0 |
| 233234 | 1 | 0 | 0 | 0 | 0 |
| 233242 | 2 | 0 | 0 | 0 | 0 |
| 233280 | 1 | 0 | 0 | 0 | 0 |
| 234235 | 1 | 0 | 0 | 0 | 0 |
| 234236 | 2 | 0 | 0 | 0 | 0 |
| 236237 | 1 | 0 | 0 | 0 | 0 |
| 236238 | 1 | 0 | 0 | 0 | 0 |
| 238239 | 1 | 0 | 0 | 0 | 0 |
| 238240 | 2 | 0 | 0 | 0 | 0 |
| 240241 | 1 | 0 | 0 | 0 | 0 |
| 240242 | 1 | 0 | 0 | 0 | 0 |
| 242243 | 1 | 0 | 0 | 0 | 0 |
| 244245 | 1 | 0 | 0 | 0 | 0 |
| 244246 | 1 | 0 | 0 | 0 | 0 |
| 244247 | 1 | 0 | 0 | 0 | 0 |
| 247248 | 1 | 0 | 0 | 0 | 0 |
| 247249 | 1 | 0 | 0 | 0 | 0 |
| 247250 | 1 | 0 | 0 | 0 | 0 |
| 250251 | 1 | 0 | 0 | 0 | 0 |
| 250267 | 2 | 0 | 0 | 0 | 0 |

|        |   |   |   |   |   |
|--------|---|---|---|---|---|
| 251252 | 1 | 0 | 0 | 0 | 0 |
| 252253 | 1 | 0 | 0 | 0 | 0 |
| 252254 | 1 | 0 | 0 | 0 | 0 |
| 252255 | 1 | 0 | 0 | 0 | 0 |
| 255256 | 1 | 0 | 0 | 0 | 0 |
| 255269 | 1 | 0 | 0 | 0 | 0 |
| 255272 | 1 | 0 | 0 | 0 | 0 |
| 256257 | 1 | 0 | 0 | 0 | 0 |
| 256258 | 1 | 0 | 0 | 0 | 0 |
| 256259 | 1 | 0 | 0 | 0 | 0 |
| 259260 | 1 | 0 | 0 | 0 | 0 |
| 260261 | 1 | 0 | 0 | 0 | 0 |
| 260268 | 2 | 0 | 0 | 0 | 0 |
| 261262 | 1 | 0 | 0 | 0 | 0 |
| 261263 | 1 | 0 | 0 | 0 | 0 |
| 261264 | 1 | 0 | 0 | 0 | 0 |
| 264265 | 1 | 0 | 0 | 0 | 0 |
| 264266 | 1 | 0 | 0 | 0 | 0 |
| 264302 | 1 | 0 | 0 | 0 | 0 |
| 269270 | 1 | 0 | 0 | 0 | 0 |
| 269271 | 1 | 0 | 0 | 0 | 0 |
| 269275 | 1 | 0 | 0 | 0 | 0 |
| 272273 | 1 | 0 | 0 | 0 | 0 |
| 272274 | 1 | 0 | 0 | 0 | 0 |
| 272279 | 1 | 0 | 0 | 0 | 0 |
| 275276 | 1 | 0 | 0 | 0 | 0 |
| 275277 | 1 | 0 | 0 | 0 | 0 |
| 275278 | 1 | 0 | 0 | 0 | 0 |
| 279280 | 1 | 0 | 0 | 0 | 0 |
| 280281 | 2 | 0 | 0 | 0 | 0 |
| 282283 | 1 | 0 | 0 | 0 | 0 |
| 282284 | 1 | 0 | 0 | 0 | 0 |
| 284285 | 1 | 0 | 0 | 0 | 0 |
| 284286 | 1 | 0 | 0 | 0 | 0 |
| 284287 | 1 | 0 | 0 | 0 | 0 |
| 287288 | 1 | 0 | 0 | 0 | 0 |
| 287289 | 1 | 0 | 0 | 0 | 0 |
| 287290 | 1 | 0 | 0 | 0 | 0 |
| 290291 | 1 | 0 | 0 | 0 | 0 |
| 290292 | 1 | 0 | 0 | 0 | 0 |
| 290293 | 1 | 0 | 0 | 0 | 0 |
| 293294 | 1 | 0 | 0 | 0 | 0 |
| 293295 | 1 | 0 | 0 | 0 | 0 |
| 293296 | 1 | 0 | 0 | 0 | 0 |
| 296297 | 1 | 0 | 0 | 0 | 0 |
| 296298 | 1 | 0 | 0 | 0 | 0 |
| 296299 | 1 | 0 | 0 | 0 | 0 |
| 299300 | 1 | 0 | 0 | 0 | 0 |
| 299301 | 1 | 0 | 0 | 0 | 0 |
| 299302 | 1 | 0 | 0 | 0 | 0 |
| 302314 | 1 | 0 | 0 | 0 | 0 |
| 303304 | 1 | 0 | 0 | 0 | 0 |
| 303312 | 2 | 0 | 0 | 0 | 0 |
| 303350 | 1 | 0 | 0 | 0 | 0 |
| 304305 | 1 | 0 | 0 | 0 | 0 |
| 304306 | 2 | 0 | 0 | 0 | 0 |
| 306307 | 1 | 0 | 0 | 0 | 0 |
| 306308 | 1 | 0 | 0 | 0 | 0 |
| 308309 | 1 | 0 | 0 | 0 | 0 |
| 308310 | 2 | 0 | 0 | 0 | 0 |
| 310311 | 1 | 0 | 0 | 0 | 0 |
| 310312 | 1 | 0 | 0 | 0 | 0 |
| 312313 | 1 | 0 | 0 | 0 | 0 |
| 314315 | 1 | 0 | 0 | 0 | 0 |
| 314316 | 1 | 0 | 0 | 0 | 0 |
| 314317 | 1 | 0 | 0 | 0 | 0 |
| 317318 | 1 | 0 | 0 | 0 | 0 |
| 317319 | 1 | 0 | 0 | 0 | 0 |
| 317320 | 1 | 0 | 0 | 0 | 0 |
| 320321 | 1 | 0 | 0 | 0 | 0 |
| 320337 | 2 | 0 | 0 | 0 | 0 |
| 321322 | 1 | 0 | 0 | 0 | 0 |
| 322323 | 1 | 0 | 0 | 0 | 0 |
| 322324 | 1 | 0 | 0 | 0 | 0 |
| 322325 | 1 | 0 | 0 | 0 | 0 |
| 325326 | 1 | 0 | 0 | 0 | 0 |
| 325339 | 1 | 0 | 0 | 0 | 0 |
| 325342 | 1 | 0 | 0 | 0 | 0 |
| 326327 | 1 | 0 | 0 | 0 | 0 |
| 326328 | 1 | 0 | 0 | 0 | 0 |
| 326329 | 1 | 0 | 0 | 0 | 0 |

```

329330 1 0 0 0 0
330331 1 0 0 0 0
330338 2 0 0 0 0
331332 1 0 0 0 0
331333 1 0 0 0 0
331334 1 0 0 0 0
334335 1 0 0 0 0
334336 1 0 0 0 0
334372 1 0 0 0 0
339340 1 0 0 0 0
339341 1 0 0 0 0
339345 1 0 0 0 0
342343 1 0 0 0 0
342344 1 0 0 0 0
342349 1 0 0 0 0
345346 1 0 0 0 0
345347 1 0 0 0 0
345348 1 0 0 0 0
349350 1 0 0 0 0
350351 2 0 0 0 0
352353 1 0 0 0 0
352354 1 0 0 0 0
354355 1 0 0 0 0
354356 1 0 0 0 0
354357 1 0 0 0 0
357358 1 0 0 0 0
357359 1 0 0 0 0
357360 1 0 0 0 0
360361 1 0 0 0 0
360362 1 0 0 0 0
360363 1 0 0 0 0
363364 1 0 0 0 0
363365 1 0 0 0 0
363366 1 0 0 0 0
366367 1 0 0 0 0
366368 1 0 0 0 0
366369 1 0 0 0 0
369370 1 0 0 0 0
369371 1 0 0 0 0
369372 1 0 0 0 0
372373 1 0 0 0 0

```

```

M END
> <NAME>
AA36_12

```

```

$$$$
AA60_12
MOE2012 3D

```

```

343347 0 0 1 0 0 0 0 0 0999 V2000
21.6980 -7.9880 0.4140 C 0 0 0 0 0 0 0 0 0 0 0 0 0 0 0 0 0 0
20.9730 -8.2970 1.1750 H 0 0 0 0 0 0 0 0 0 0 0 0 0 0 0 0 0 0
22.6660 -7.8090 0.8920 H 0 0 0 0 0 0 0 0 0 0 0 0 0 0 0 0 0 0
21.8250 -8.8200 -0.2860 H 0 0 0 0 0 0 0 0 0 0 0 0 0 0 0 0 0 0
21.2420 -6.8100 -0.3130 N 0 0 3 0 0 0 0 0 0 0 0 0 0 0 0 0 0 0
20.3530 -7.0220 -0.7680 H 0 0 0 0 0 0 0 0 0 0 0 0 0 0 0 0 0 0
21.0650 -5.6700 0.5980 C 0 0 0 0 0 0 0 0 0 0 0 0 0 0 0 0 0 0
20.3120 -5.9280 1.3490 H 0 0 0 0 0 0 0 0 0 0 0 0 0 0 0 0 0 0
22.0080 -5.4600 1.1190 H 0 0 0 0 0 0 0 0 0 0 0 0 0 0 0 0 0 0
20.6390 -4.4100 -0.1870 C 0 0 0 0 0 0 0 0 0 0 0 0 0 0 0 0 0 0
21.4190 -4.2310 -0.9350 H 0 0 0 0 0 0 0 0 0 0 0 0 0 0 0 0 0 0
19.7120 -4.6000 -0.7440 H 0 0 0 0 0 0 0 0 0 0 0 0 0 0 0 0 0 0
20.4870 -3.2240 0.6820 N 0 0 3 0 0 0 0 0 0 0 0 0 0 0 0 0 0 0
19.2600 -3.3110 1.4820 C 0 0 0 0 0 0 0 0 0 0 0 0 0 0 0 0 0 0
19.2700 -4.1850 2.1400 H 0 0 0 0 0 0 0 0 0 0 0 0 0 0 0 0 0 0
18.3620 -3.3580 0.8550 H 0 0 0 0 0 0 0 0 0 0 0 0 0 0 0 0 0 0
19.1700 -2.4420 2.1450 H 0 0 0 0 0 0 0 0 0 0 0 0 0 0 0 0 0 0
28.2960 -5.3050 3.3890 C 0 0 0 0 0 0 0 0 0 0 0 0 0 0 0 0 0 0
27.2650 -6.1430 2.9500 C 0 0 0 0 0 0 0 0 0 0 0 0 0 0 0 0 0 0
26.5060 -5.7900 2.2560 H 0 0 0 0 0 0 0 0 0 0 0 0 0 0 0 0 0 0
27.1970 -7.4640 3.4000 C 0 0 0 0 0 0 0 0 0 0 0 0 0 0 0 0 0 0
26.3950 -8.1140 3.0580 H 0 0 0 0 0 0 0 0 0 0 0 0 0 0 0 0 0 0
28.1540 -7.9510 4.2890 C 0 0 0 0 0 0 0 0 0 0 0 0 0 0 0 0 0 0
28.0950 -8.9790 4.6370 H 0 0 0 0 0 0 0 0 0 0 0 0 0 0 0 0 0 0
29.1850 -7.1220 4.7290 C 0 0 0 0 0 0 0 0 0 0 0 0 0 0 0 0 0 0
29.9310 -7.5020 5.4230 H 0 0 0 0 0 0 0 0 0 0 0 0 0 0 0 0 0 0
29.2570 -5.8020 4.2800 C 0 0 0 0 0 0 0 0 0 0 0 0 0 0 0 0 0 0
30.0680 -5.1660 4.6290 H 0 0 0 0 0 0 0 0 0 0 0 0 0 0 0 0 0 0
20.4810 -1.9640 -0.0870 C 0 0 0 0 0 0 0 0 0 0 0 0 0 0 0 0 0 0
20.1650 -1.1430 0.5710 H 0 0 0 0 0 0 0 0 0 0 0 0 0 0 0 0 0 0
19.7450 -2.0110 -0.9010 H 0 0 0 0 0 0 0 0 0 0 0 0 0 0 0 0 0 0

```









|    |     |   |   |   |   |   |
|----|-----|---|---|---|---|---|
| 13 | 14  | 1 | 0 | 0 | 0 | 0 |
| 13 | 29  | 1 | 0 | 0 | 0 | 0 |
| 14 | 15  | 1 | 0 | 0 | 0 | 0 |
| 14 | 16  | 1 | 0 | 0 | 0 | 0 |
| 14 | 17  | 1 | 0 | 0 | 0 | 0 |
| 18 | 19  | 1 | 0 | 0 | 0 | 0 |
| 18 | 27  | 2 | 0 | 0 | 0 | 0 |
| 18 | 65  | 1 | 0 | 0 | 0 | 0 |
| 19 | 20  | 1 | 0 | 0 | 0 | 0 |
| 19 | 21  | 2 | 0 | 0 | 0 | 0 |
| 21 | 22  | 1 | 0 | 0 | 0 | 0 |
| 21 | 23  | 1 | 0 | 0 | 0 | 0 |
| 23 | 24  | 1 | 0 | 0 | 0 | 0 |
| 23 | 25  | 2 | 0 | 0 | 0 | 0 |
| 25 | 26  | 1 | 0 | 0 | 0 | 0 |
| 25 | 27  | 1 | 0 | 0 | 0 | 0 |
| 27 | 28  | 1 | 0 | 0 | 0 | 0 |
| 29 | 30  | 1 | 0 | 0 | 0 | 0 |
| 29 | 31  | 1 | 0 | 0 | 0 | 0 |
| 29 | 32  | 1 | 0 | 0 | 0 | 0 |
| 32 | 33  | 1 | 0 | 0 | 0 | 0 |
| 32 | 34  | 1 | 0 | 0 | 0 | 0 |
| 32 | 35  | 1 | 0 | 0 | 0 | 0 |
| 35 | 36  | 1 | 0 | 0 | 0 | 0 |
| 35 | 52  | 2 | 0 | 0 | 0 | 0 |
| 36 | 37  | 1 | 0 | 0 | 0 | 0 |
| 37 | 38  | 1 | 0 | 0 | 0 | 0 |
| 37 | 39  | 1 | 0 | 0 | 0 | 0 |
| 37 | 40  | 1 | 0 | 0 | 0 | 0 |
| 40 | 41  | 1 | 0 | 0 | 0 | 0 |
| 40 | 54  | 1 | 0 | 0 | 0 | 0 |
| 40 | 57  | 1 | 0 | 0 | 0 | 0 |
| 41 | 42  | 1 | 0 | 0 | 0 | 0 |
| 41 | 43  | 1 | 0 | 0 | 0 | 0 |
| 41 | 44  | 1 | 0 | 0 | 0 | 0 |
| 44 | 45  | 1 | 0 | 0 | 0 | 0 |
| 45 | 46  | 1 | 0 | 0 | 0 | 0 |
| 45 | 53  | 2 | 0 | 0 | 0 | 0 |
| 46 | 47  | 1 | 0 | 0 | 0 | 0 |
| 46 | 48  | 1 | 0 | 0 | 0 | 0 |
| 46 | 49  | 1 | 0 | 0 | 0 | 0 |
| 49 | 50  | 1 | 0 | 0 | 0 | 0 |
| 49 | 51  | 1 | 0 | 0 | 0 | 0 |
| 49 | 71  | 1 | 0 | 0 | 0 | 0 |
| 54 | 55  | 1 | 0 | 0 | 0 | 0 |
| 54 | 56  | 1 | 0 | 0 | 0 | 0 |
| 54 | 60  | 1 | 0 | 0 | 0 | 0 |
| 57 | 58  | 1 | 0 | 0 | 0 | 0 |
| 57 | 59  | 1 | 0 | 0 | 0 | 0 |
| 57 | 64  | 1 | 0 | 0 | 0 | 0 |
| 60 | 61  | 1 | 0 | 0 | 0 | 0 |
| 60 | 62  | 1 | 0 | 0 | 0 | 0 |
| 60 | 63  | 1 | 0 | 0 | 0 | 0 |
| 64 | 65  | 1 | 0 | 0 | 0 | 0 |
| 65 | 66  | 2 | 0 | 0 | 0 | 0 |
| 67 | 68  | 1 | 0 | 0 | 0 | 0 |
| 67 | 69  | 1 | 0 | 0 | 0 | 0 |
| 67 | 70  | 1 | 0 | 0 | 0 | 0 |
| 67 | 71  | 1 | 0 | 0 | 0 | 0 |
| 71 | 72  | 1 | 0 | 0 | 0 | 0 |
| 72 | 73  | 1 | 0 | 0 | 0 | 0 |
| 72 | 74  | 1 | 0 | 0 | 0 | 0 |
| 72 | 75  | 1 | 0 | 0 | 0 | 0 |
| 75 | 76  | 1 | 0 | 0 | 0 | 0 |
| 75 | 77  | 1 | 0 | 0 | 0 | 0 |
| 75 | 78  | 1 | 0 | 0 | 0 | 0 |
| 78 | 79  | 1 | 0 | 0 | 0 | 0 |
| 78 | 94  | 1 | 0 | 0 | 0 | 0 |
| 79 | 80  | 1 | 0 | 0 | 0 | 0 |
| 79 | 81  | 1 | 0 | 0 | 0 | 0 |
| 79 | 82  | 1 | 0 | 0 | 0 | 0 |
| 83 | 84  | 1 | 0 | 0 | 0 | 0 |
| 83 | 92  | 2 | 0 | 0 | 0 | 0 |
| 83 | 130 | 1 | 0 | 0 | 0 | 0 |
| 84 | 85  | 1 | 0 | 0 | 0 | 0 |
| 84 | 86  | 2 | 0 | 0 | 0 | 0 |
| 86 | 87  | 1 | 0 | 0 | 0 | 0 |
| 86 | 88  | 1 | 0 | 0 | 0 | 0 |
| 88 | 89  | 1 | 0 | 0 | 0 | 0 |
| 88 | 90  | 2 | 0 | 0 | 0 | 0 |
| 90 | 91  | 1 | 0 | 0 | 0 | 0 |



|     |     |   |   |   |   |   |
|-----|-----|---|---|---|---|---|
| 90  | 92  | 1 | 0 | 0 | 0 | 0 |
| 92  | 93  | 1 | 0 | 0 | 0 | 0 |
| 94  | 95  | 1 | 0 | 0 | 0 | 0 |
| 94  | 96  | 1 | 0 | 0 | 0 | 0 |
| 94  | 97  | 1 | 0 | 0 | 0 | 0 |
| 97  | 98  | 1 | 0 | 0 | 0 | 0 |
| 97  | 99  | 1 | 0 | 0 | 0 | 0 |
| 97  | 100 | 1 | 0 | 0 | 0 | 0 |
| 100 | 101 | 1 | 0 | 0 | 0 | 0 |
| 100 | 117 | 2 | 0 | 0 | 0 | 0 |
| 101 | 102 | 1 | 0 | 0 | 0 | 0 |
| 102 | 103 | 1 | 0 | 0 | 0 | 0 |
| 102 | 104 | 1 | 0 | 0 | 0 | 0 |
| 102 | 105 | 1 | 0 | 0 | 0 | 0 |
| 105 | 106 | 1 | 0 | 0 | 0 | 0 |
| 105 | 119 | 1 | 0 | 0 | 0 | 0 |
| 105 | 122 | 1 | 0 | 0 | 0 | 0 |
| 106 | 107 | 1 | 0 | 0 | 0 | 0 |
| 106 | 108 | 1 | 0 | 0 | 0 | 0 |
| 106 | 109 | 1 | 0 | 0 | 0 | 0 |
| 109 | 110 | 1 | 0 | 0 | 0 | 0 |
| 110 | 111 | 1 | 0 | 0 | 0 | 0 |
| 110 | 118 | 2 | 0 | 0 | 0 | 0 |
| 111 | 112 | 1 | 0 | 0 | 0 | 0 |
| 111 | 113 | 1 | 0 | 0 | 0 | 0 |
| 111 | 114 | 1 | 0 | 0 | 0 | 0 |
| 114 | 115 | 1 | 0 | 0 | 0 | 0 |
| 114 | 116 | 1 | 0 | 0 | 0 | 0 |
| 114 | 136 | 1 | 0 | 0 | 0 | 0 |
| 119 | 120 | 1 | 0 | 0 | 0 | 0 |
| 119 | 121 | 1 | 0 | 0 | 0 | 0 |
| 119 | 125 | 1 | 0 | 0 | 0 | 0 |
| 122 | 123 | 1 | 0 | 0 | 0 | 0 |
| 122 | 124 | 1 | 0 | 0 | 0 | 0 |
| 122 | 129 | 1 | 0 | 0 | 0 | 0 |
| 125 | 126 | 1 | 0 | 0 | 0 | 0 |
| 125 | 127 | 1 | 0 | 0 | 0 | 0 |
| 125 | 128 | 1 | 0 | 0 | 0 | 0 |
| 129 | 130 | 1 | 0 | 0 | 0 | 0 |
| 130 | 131 | 2 | 0 | 0 | 0 | 0 |
| 132 | 133 | 1 | 0 | 0 | 0 | 0 |
| 132 | 134 | 1 | 0 | 0 | 0 | 0 |
| 132 | 135 | 1 | 0 | 0 | 0 | 0 |
| 132 | 136 | 1 | 0 | 0 | 0 | 0 |
| 136 | 137 | 1 | 0 | 0 | 0 | 0 |
| 137 | 138 | 1 | 0 | 0 | 0 | 0 |
| 137 | 139 | 1 | 0 | 0 | 0 | 0 |
| 137 | 140 | 1 | 0 | 0 | 0 | 0 |
| 140 | 141 | 1 | 0 | 0 | 0 | 0 |
| 140 | 142 | 1 | 0 | 0 | 0 | 0 |
| 140 | 143 | 1 | 0 | 0 | 0 | 0 |
| 143 | 144 | 1 | 0 | 0 | 0 | 0 |
| 143 | 159 | 1 | 0 | 0 | 0 | 0 |
| 144 | 145 | 1 | 0 | 0 | 0 | 0 |
| 144 | 146 | 1 | 0 | 0 | 0 | 0 |
| 144 | 147 | 1 | 0 | 0 | 0 | 0 |
| 148 | 149 | 1 | 0 | 0 | 0 | 0 |
| 148 | 157 | 2 | 0 | 0 | 0 | 0 |
| 148 | 195 | 1 | 0 | 0 | 0 | 0 |
| 149 | 150 | 1 | 0 | 0 | 0 | 0 |
| 149 | 151 | 2 | 0 | 0 | 0 | 0 |
| 151 | 152 | 1 | 0 | 0 | 0 | 0 |
| 151 | 153 | 1 | 0 | 0 | 0 | 0 |
| 153 | 154 | 1 | 0 | 0 | 0 | 0 |
| 153 | 155 | 2 | 0 | 0 | 0 | 0 |
| 155 | 156 | 1 | 0 | 0 | 0 | 0 |
| 155 | 157 | 1 | 0 | 0 | 0 | 0 |
| 157 | 158 | 1 | 0 | 0 | 0 | 0 |
| 159 | 160 | 1 | 0 | 0 | 0 | 0 |
| 159 | 161 | 1 | 0 | 0 | 0 | 0 |
| 159 | 162 | 1 | 0 | 0 | 0 | 0 |
| 162 | 163 | 1 | 0 | 0 | 0 | 0 |
| 162 | 164 | 1 | 0 | 0 | 0 | 0 |
| 162 | 165 | 1 | 0 | 0 | 0 | 0 |
| 165 | 166 | 1 | 0 | 0 | 0 | 0 |
| 165 | 182 | 2 | 0 | 0 | 0 | 0 |
| 166 | 167 | 1 | 0 | 0 | 0 | 0 |
| 167 | 168 | 1 | 0 | 0 | 0 | 0 |
| 167 | 169 | 1 | 0 | 0 | 0 | 0 |
| 167 | 170 | 1 | 0 | 0 | 0 | 0 |
| 170 | 171 | 1 | 0 | 0 | 0 | 0 |

|        |   |   |   |   |   |
|--------|---|---|---|---|---|
| 170184 | 1 | 0 | 0 | 0 | 0 |
| 170187 | 1 | 0 | 0 | 0 | 0 |
| 171172 | 1 | 0 | 0 | 0 | 0 |
| 171173 | 1 | 0 | 0 | 0 | 0 |
| 171174 | 1 | 0 | 0 | 0 | 0 |
| 174175 | 1 | 0 | 0 | 0 | 0 |
| 175176 | 1 | 0 | 0 | 0 | 0 |
| 175183 | 2 | 0 | 0 | 0 | 0 |
| 176177 | 1 | 0 | 0 | 0 | 0 |
| 176178 | 1 | 0 | 0 | 0 | 0 |
| 176179 | 1 | 0 | 0 | 0 | 0 |
| 179180 | 1 | 0 | 0 | 0 | 0 |
| 179181 | 1 | 0 | 0 | 0 | 0 |
| 179201 | 1 | 0 | 0 | 0 | 0 |
| 184185 | 1 | 0 | 0 | 0 | 0 |
| 184186 | 1 | 0 | 0 | 0 | 0 |
| 184190 | 1 | 0 | 0 | 0 | 0 |
| 187188 | 1 | 0 | 0 | 0 | 0 |
| 187189 | 1 | 0 | 0 | 0 | 0 |
| 187194 | 1 | 0 | 0 | 0 | 0 |
| 190191 | 1 | 0 | 0 | 0 | 0 |
| 190192 | 1 | 0 | 0 | 0 | 0 |
| 190193 | 1 | 0 | 0 | 0 | 0 |
| 194195 | 1 | 0 | 0 | 0 | 0 |
| 195196 | 2 | 0 | 0 | 0 | 0 |
| 197198 | 1 | 0 | 0 | 0 | 0 |
| 197199 | 1 | 0 | 0 | 0 | 0 |
| 197200 | 1 | 0 | 0 | 0 | 0 |
| 197201 | 1 | 0 | 0 | 0 | 0 |
| 201202 | 1 | 0 | 0 | 0 | 0 |
| 202203 | 1 | 0 | 0 | 0 | 0 |
| 202204 | 1 | 0 | 0 | 0 | 0 |
| 202205 | 1 | 0 | 0 | 0 | 0 |
| 205206 | 1 | 0 | 0 | 0 | 0 |
| 205207 | 1 | 0 | 0 | 0 | 0 |
| 205208 | 1 | 0 | 0 | 0 | 0 |
| 208209 | 1 | 0 | 0 | 0 | 0 |
| 208224 | 1 | 0 | 0 | 0 | 0 |
| 209210 | 1 | 0 | 0 | 0 | 0 |
| 209211 | 1 | 0 | 0 | 0 | 0 |
| 209212 | 1 | 0 | 0 | 0 | 0 |
| 213214 | 1 | 0 | 0 | 0 | 0 |
| 213222 | 2 | 0 | 0 | 0 | 0 |
| 213260 | 1 | 0 | 0 | 0 | 0 |
| 214215 | 1 | 0 | 0 | 0 | 0 |
| 214216 | 2 | 0 | 0 | 0 | 0 |
| 216217 | 1 | 0 | 0 | 0 | 0 |
| 216218 | 1 | 0 | 0 | 0 | 0 |
| 218219 | 1 | 0 | 0 | 0 | 0 |
| 218220 | 2 | 0 | 0 | 0 | 0 |
| 220221 | 1 | 0 | 0 | 0 | 0 |
| 220222 | 1 | 0 | 0 | 0 | 0 |
| 222223 | 1 | 0 | 0 | 0 | 0 |
| 224225 | 1 | 0 | 0 | 0 | 0 |
| 224226 | 1 | 0 | 0 | 0 | 0 |
| 224227 | 1 | 0 | 0 | 0 | 0 |
| 227228 | 1 | 0 | 0 | 0 | 0 |
| 227229 | 1 | 0 | 0 | 0 | 0 |
| 227230 | 1 | 0 | 0 | 0 | 0 |
| 230231 | 1 | 0 | 0 | 0 | 0 |
| 230247 | 2 | 0 | 0 | 0 | 0 |
| 231232 | 1 | 0 | 0 | 0 | 0 |
| 232233 | 1 | 0 | 0 | 0 | 0 |
| 232234 | 1 | 0 | 0 | 0 | 0 |
| 232235 | 1 | 0 | 0 | 0 | 0 |
| 235236 | 1 | 0 | 0 | 0 | 0 |
| 235249 | 1 | 0 | 0 | 0 | 0 |
| 235252 | 1 | 0 | 0 | 0 | 0 |
| 236237 | 1 | 0 | 0 | 0 | 0 |
| 236238 | 1 | 0 | 0 | 0 | 0 |
| 236239 | 1 | 0 | 0 | 0 | 0 |
| 239240 | 1 | 0 | 0 | 0 | 0 |
| 240241 | 1 | 0 | 0 | 0 | 0 |
| 240248 | 2 | 0 | 0 | 0 | 0 |
| 241242 | 1 | 0 | 0 | 0 | 0 |
| 241243 | 1 | 0 | 0 | 0 | 0 |
| 241244 | 1 | 0 | 0 | 0 | 0 |
| 244245 | 1 | 0 | 0 | 0 | 0 |
| 244246 | 1 | 0 | 0 | 0 | 0 |
| 244266 | 1 | 0 | 0 | 0 | 0 |
| 249250 | 1 | 0 | 0 | 0 | 0 |

|        |   |   |   |   |   |
|--------|---|---|---|---|---|
| 249251 | 1 | 0 | 0 | 0 | 0 |
| 249255 | 1 | 0 | 0 | 0 | 0 |
| 252253 | 1 | 0 | 0 | 0 | 0 |
| 252254 | 1 | 0 | 0 | 0 | 0 |
| 252259 | 1 | 0 | 0 | 0 | 0 |
| 255256 | 1 | 0 | 0 | 0 | 0 |
| 255257 | 1 | 0 | 0 | 0 | 0 |
| 255258 | 1 | 0 | 0 | 0 | 0 |
| 259260 | 1 | 0 | 0 | 0 | 0 |
| 260261 | 2 | 0 | 0 | 0 | 0 |
| 262263 | 1 | 0 | 0 | 0 | 0 |
| 262264 | 1 | 0 | 0 | 0 | 0 |
| 262265 | 1 | 0 | 0 | 0 | 0 |
| 262266 | 1 | 0 | 0 | 0 | 0 |
| 266267 | 1 | 0 | 0 | 0 | 0 |
| 267268 | 1 | 0 | 0 | 0 | 0 |
| 267269 | 1 | 0 | 0 | 0 | 0 |
| 267270 | 1 | 0 | 0 | 0 | 0 |
| 270271 | 1 | 0 | 0 | 0 | 0 |
| 270272 | 1 | 0 | 0 | 0 | 0 |
| 270273 | 1 | 0 | 0 | 0 | 0 |
| 273274 | 1 | 0 | 0 | 0 | 0 |
| 273289 | 1 | 0 | 0 | 0 | 0 |
| 274275 | 1 | 0 | 0 | 0 | 0 |
| 274276 | 1 | 0 | 0 | 0 | 0 |
| 274277 | 1 | 0 | 0 | 0 | 0 |
| 278279 | 1 | 0 | 0 | 0 | 0 |
| 278287 | 2 | 0 | 0 | 0 | 0 |
| 278325 | 1 | 0 | 0 | 0 | 0 |
| 279280 | 1 | 0 | 0 | 0 | 0 |
| 279281 | 2 | 0 | 0 | 0 | 0 |
| 281282 | 1 | 0 | 0 | 0 | 0 |
| 281283 | 1 | 0 | 0 | 0 | 0 |
| 283284 | 1 | 0 | 0 | 0 | 0 |
| 283285 | 2 | 0 | 0 | 0 | 0 |
| 285286 | 1 | 0 | 0 | 0 | 0 |
| 285287 | 1 | 0 | 0 | 0 | 0 |
| 287288 | 1 | 0 | 0 | 0 | 0 |
| 289290 | 1 | 0 | 0 | 0 | 0 |
| 289291 | 1 | 0 | 0 | 0 | 0 |
| 289292 | 1 | 0 | 0 | 0 | 0 |
| 292293 | 1 | 0 | 0 | 0 | 0 |
| 292294 | 1 | 0 | 0 | 0 | 0 |
| 292295 | 1 | 0 | 0 | 0 | 0 |
| 295296 | 1 | 0 | 0 | 0 | 0 |
| 295312 | 2 | 0 | 0 | 0 | 0 |
| 296297 | 1 | 0 | 0 | 0 | 0 |
| 297298 | 1 | 0 | 0 | 0 | 0 |
| 297299 | 1 | 0 | 0 | 0 | 0 |
| 297300 | 1 | 0 | 0 | 0 | 0 |
| 300301 | 1 | 0 | 0 | 0 | 0 |
| 300314 | 1 | 0 | 0 | 0 | 0 |
| 300317 | 1 | 0 | 0 | 0 | 0 |
| 301302 | 1 | 0 | 0 | 0 | 0 |
| 301303 | 1 | 0 | 0 | 0 | 0 |
| 301304 | 1 | 0 | 0 | 0 | 0 |
| 304305 | 1 | 0 | 0 | 0 | 0 |
| 305306 | 1 | 0 | 0 | 0 | 0 |
| 305313 | 2 | 0 | 0 | 0 | 0 |
| 306307 | 1 | 0 | 0 | 0 | 0 |
| 306308 | 1 | 0 | 0 | 0 | 0 |
| 306309 | 1 | 0 | 0 | 0 | 0 |
| 309310 | 1 | 0 | 0 | 0 | 0 |
| 309311 | 1 | 0 | 0 | 0 | 0 |
| 309331 | 1 | 0 | 0 | 0 | 0 |
| 314315 | 1 | 0 | 0 | 0 | 0 |
| 314316 | 1 | 0 | 0 | 0 | 0 |
| 314320 | 1 | 0 | 0 | 0 | 0 |
| 317318 | 1 | 0 | 0 | 0 | 0 |
| 317319 | 1 | 0 | 0 | 0 | 0 |
| 317324 | 1 | 0 | 0 | 0 | 0 |
| 320321 | 1 | 0 | 0 | 0 | 0 |
| 320322 | 1 | 0 | 0 | 0 | 0 |
| 320323 | 1 | 0 | 0 | 0 | 0 |
| 324325 | 1 | 0 | 0 | 0 | 0 |
| 325326 | 2 | 0 | 0 | 0 | 0 |
| 327328 | 1 | 0 | 0 | 0 | 0 |
| 327329 | 1 | 0 | 0 | 0 | 0 |
| 327330 | 1 | 0 | 0 | 0 | 0 |
| 327331 | 1 | 0 | 0 | 0 | 0 |
| 331332 | 1 | 0 | 0 | 0 | 0 |

332333 1 0 0 0 0  
332334 1 0 0 0 0  
332335 1 0 0 0 0  
335336 1 0 0 0 0  
335337 1 0 0 0 0  
335338 1 0 0 0 0  
338339 1 0 0 0 0  
338340 1 0 0 0 0  
340341 1 0 0 0 0  
340342 1 0 0 0 0  
340343 1 0 0 0 0

M END  
> <NAME>  
AA60\_12

\$\$\$\$  
AA61\_12  
MOE2012 3D

379383 0 0 1 0 0 0 0 0999 V2000  
32.5490 -13.1330 -3.8890 C 0 0 0 0 0 0 0 0 0 0 0 0 0 0 0  
32.7440 -13.2810 -4.9570 H 0 0 0 0 0 0 0 0 0 0 0 0 0 0 0  
33.1270 -12.2650 -3.5530 H 0 0 0 0 0 0 0 0 0 0 0 0 0 0 0  
31.1200 -12.9210 -3.6600 N 0 0 0 3 0 0 0 0 0 0 0 0 0 0 0  
30.9490 -12.8140 -2.6590 H 0 0 0 0 0 0 0 0 0 0 0 0 0 0 0  
30.6480 -11.7240 -4.3680 C 0 0 0 0 0 0 0 0 0 0 0 0 0 0 0  
31.1900 -10.8400 -4.0100 H 0 0 0 0 0 0 0 0 0 0 0 0 0 0 0  
30.8580 -11.8370 -5.4360 H 0 0 0 0 0 0 0 0 0 0 0 0 0 0 0  
29.1360 -11.5180 -4.1340 C 0 0 0 0 0 0 0 0 0 0 0 0 0 0 0  
28.5690 -12.4030 -4.4570 H 0 0 0 0 0 0 0 0 0 0 0 0 0 0 0  
28.9910 -11.4420 -3.0500 H 0 0 0 0 0 0 0 0 0 0 0 0 0 0 0  
28.6280 -10.2990 -4.8060 N 0 0 0 3 0 0 0 0 0 0 0 0 0 0 0  
27.3820 -9.8290 -4.1680 C 0 0 0 0 0 0 0 0 0 0 0 0 0 0 0  
26.8560 -9.1290 -4.8230 H 0 0 0 0 0 0 0 0 0 0 0 0 0 0 0  
26.6920 -10.6610 -3.9840 H 0 0 0 0 0 0 0 0 0 0 0 0 0 0 0  
33.0140 -14.3650 -3.1280 C 0 0 0 0 0 0 0 0 0 0 0 0 0 0 0  
32.8660 -14.2460 -2.0490 H 0 0 0 0 0 0 0 0 0 0 0 0 0 0 0  
32.4720 -15.2600 -3.4530 H 0 0 0 0 0 0 0 0 0 0 0 0 0 0 0  
34.0820 -14.5350 -3.3040 H 0 0 0 0 0 0 0 0 0 0 0 0 0 0 0  
27.6560 -9.0680 -2.8740 C 0 0 0 0 0 0 0 0 0 0 0 0 0 0 0  
28.3360 -8.2280 -3.0500 H 0 0 0 0 0 0 0 0 0 0 0 0 0 0 0  
28.0890 -9.7050 -2.0980 H 0 0 0 0 0 0 0 0 0 0 0 0 0 0 0  
26.7200 -8.6610 -2.4780 H 0 0 0 0 0 0 0 0 0 0 0 0 0 0 0  
20.9000 -7.3580 -6.9420 C 0 0 0 0 0 0 0 0 0 0 0 0 0 0 0  
21.0960 -8.0330 -5.7300 C 0 0 0 0 0 0 0 0 0 0 0 0 0 0 0  
21.9420 -7.8050 -5.0860 H 0 0 0 0 0 0 0 0 0 0 0 0 0 0 0  
20.1940 -9.0200 -5.3240 C 0 0 0 0 0 0 0 0 0 0 0 0 0 0 0  
20.3480 -9.5400 -4.3820 H 0 0 0 0 0 0 0 0 0 0 0 0 0 0 0  
19.0960 -9.3370 -6.1220 C 0 0 0 0 0 0 0 0 0 0 0 0 0 0 0  
18.3950 -10.1040 -5.8040 H 0 0 0 0 0 0 0 0 0 0 0 0 0 0 0  
18.8960 -8.6670 -7.3280 C 0 0 0 0 0 0 0 0 0 0 0 0 0 0 0  
18.0390 -8.9140 -7.9500 H 0 0 0 0 0 0 0 0 0 0 0 0 0 0 0  
19.7930 -7.6800 -7.7380 C 0 0 0 0 0 0 0 0 0 0 0 0 0 0 0  
19.6210 -7.1660 -8.6820 H 0 0 0 0 0 0 0 0 0 0 0 0 0 0 0  
28.4120 -10.5580 -6.2490 C 0 0 0 0 0 0 0 0 0 0 0 0 0 0 0  
27.4800 -11.1150 -6.4110 H 0 0 0 0 0 0 0 0 0 0 0 0 0 0 0  
29.2120 -11.2010 -6.6310 H 0 0 0 0 0 0 0 0 0 0 0 0 0 0 0  
28.4840 -9.2740 -7.0790 C 0 0 0 0 0 0 0 0 0 0 0 0 0 0 0  
29.0130 -8.4740 -6.5480 H 0 0 0 0 0 0 0 0 0 0 0 0 0 0 0  
29.0530 -9.4490 -8.0000 H 0 0 0 0 0 0 0 0 0 0 0 0 0 0 0  
27.1160 -8.8190 -7.5010 C 0 0 0 0 0 0 0 0 0 0 0 0 0 0 0  
26.8500 -7.5830 -6.9950 O 0 0 0 0 0 0 0 0 0 0 0 0 0 0 0  
25.5470 -7.0680 -7.3080 C 0 0 0 0 0 0 0 0 0 0 0 0 0 0 0  
25.5010 -6.8740 -8.3870 H 0 0 0 0 0 0 0 0 0 0 0 0 0 0 0  
24.7930 -7.8260 -7.0590 H 0 0 0 0 0 0 0 0 0 0 0 0 0 0 0  
25.2800 -5.7550 -6.5170 C 0 0 0 3 0 0 0 0 0 0 0 0 0 0 0  
25.3130 -6.1010 -5.0050 C 0 0 0 0 0 0 0 0 0 0 0 0 0 0 0  
24.6860 -6.9800 -4.8070 H 0 0 0 0 0 0 0 0 0 0 0 0 0 0 0  
26.3380 -6.3320 -4.6870 H 0 0 0 0 0 0 0 0 0 0 0 0 0 0 0  
24.8310 -5.0000 -4.2170 O 0 0 0 0 0 0 0 0 0 0 0 0 0 0 0  
24.6610 -5.2650 -2.8900 C 0 0 0 0 0 0 0 0 0 0 0 0 0 0 0  
24.2120 -4.0110 -2.1790 C 0 0 0 0 0 0 0 0 0 0 0 0 0 0 0  
24.9360 -3.2240 -2.4140 H 0 0 0 0 0 0 0 0 0 0 0 0 0 0 0  
23.2270 -3.7310 -2.5680 H 0 0 0 0 0 0 0 0 0 0 0 0 0 0 0  
24.1390 -4.2390 -0.6650 C 0 0 0 0 0 0 0 0 0 0 0 0 0 0 0  
23.5040 -5.1190 -0.4970 H 0 0 0 0 0 0 0 0 0 0 0 0 0 0 0  
25.1320 -4.5050 -0.2810 H 0 0 0 0 0 0 0 0 0 0 0 0 0 0 0  
26.3530 -9.4810 -8.1910 O 0 0 0 0 0 0 0 0 0 0 0 0 0 0 0  
24.8500 -6.3490 -2.3580 O 0 0 0 0 0 0 0 0 0 0 0 0 0 0 0  
26.3850 -4.7220 -6.8920 C 0 0 0 0 0 0 0 0 0 0 0 0 0 0 0  
27.3710 -5.1260 -6.6310 H 0 0 0 0 0 0 0 0 0 0 0 0 0 0 0





|         |         |         |   |   |   |   |   |   |   |   |   |   |   |   |   |   |   |
|---------|---------|---------|---|---|---|---|---|---|---|---|---|---|---|---|---|---|---|
| 45.4260 | 4.8500  | 11.6290 | H | 0 | 0 | 0 | 0 | 0 | 0 | 0 | 0 | 0 | 0 | 0 | 0 | 0 | 0 |
| 47.3580 | 3.9650  | 11.8180 | N | 0 | 0 | 3 | 0 | 0 | 0 | 0 | 0 | 0 | 0 | 0 | 0 | 0 | 0 |
| 46.6110 | 2.7030  | 11.9690 | C | 0 | 0 | 0 | 0 | 0 | 0 | 0 | 0 | 0 | 0 | 0 | 0 | 0 | 0 |
| 47.2980 | 1.9130  | 12.3000 | H | 0 | 0 | 0 | 0 | 0 | 0 | 0 | 0 | 0 | 0 | 0 | 0 | 0 | 0 |
| 45.8380 | 2.7950  | 12.7420 | H | 0 | 0 | 0 | 0 | 0 | 0 | 0 | 0 | 0 | 0 | 0 | 0 | 0 | 0 |
| 47.2720 | 8.5160  | 10.4530 | C | 0 | 0 | 0 | 0 | 0 | 0 | 0 | 0 | 0 | 0 | 0 | 0 | 0 | 0 |
| 47.9500 | 7.8900  | 11.0360 | H | 0 | 0 | 0 | 0 | 0 | 0 | 0 | 0 | 0 | 0 | 0 | 0 | 0 | 0 |
| 47.7360 | 8.7170  | 9.4820  | H | 0 | 0 | 0 | 0 | 0 | 0 | 0 | 0 | 0 | 0 | 0 | 0 | 0 | 0 |
| 47.1690 | 9.4730  | 10.9760 | H | 0 | 0 | 0 | 0 | 0 | 0 | 0 | 0 | 0 | 0 | 0 | 0 | 0 | 0 |
| 45.9850 | 2.2100  | 10.6680 | C | 0 | 0 | 0 | 0 | 0 | 0 | 0 | 0 | 0 | 0 | 0 | 0 | 0 | 0 |
| 46.7380 | 2.1200  | 9.8780  | H | 0 | 0 | 0 | 0 | 0 | 0 | 0 | 0 | 0 | 0 | 0 | 0 | 0 | 0 |
| 45.1910 | 2.8740  | 10.3160 | H | 0 | 0 | 0 | 0 | 0 | 0 | 0 | 0 | 0 | 0 | 0 | 0 | 0 | 0 |
| 45.5410 | 1.2210  | 10.8200 | H | 0 | 0 | 0 | 0 | 0 | 0 | 0 | 0 | 0 | 0 | 0 | 0 | 0 | 0 |
| 50.7850 | 8.8700  | 13.4130 | C | 0 | 0 | 0 | 0 | 0 | 0 | 0 | 0 | 0 | 0 | 0 | 0 | 0 | 0 |
| 49.9630 | 9.8000  | 12.7660 | C | 0 | 0 | 0 | 0 | 0 | 0 | 0 | 0 | 0 | 0 | 0 | 0 | 0 | 0 |
| 50.0620 | 9.9970  | 11.7020 | H | 0 | 0 | 0 | 0 | 0 | 0 | 0 | 0 | 0 | 0 | 0 | 0 | 0 | 0 |
| 48.9890 | 10.4970 | 13.4850 | C | 0 | 0 | 0 | 0 | 0 | 0 | 0 | 0 | 0 | 0 | 0 | 0 | 0 | 0 |
| 48.3630 | 11.2280 | 12.9790 | H | 0 | 0 | 0 | 0 | 0 | 0 | 0 | 0 | 0 | 0 | 0 | 0 | 0 | 0 |
| 48.8250 | 10.2620 | 14.8480 | C | 0 | 0 | 0 | 0 | 0 | 0 | 0 | 0 | 0 | 0 | 0 | 0 | 0 | 0 |
| 48.0700 | 10.8070 | 15.4090 | H | 0 | 0 | 0 | 0 | 0 | 0 | 0 | 0 | 0 | 0 | 0 | 0 | 0 | 0 |
| 49.6330 | 9.3280  | 15.4960 | C | 0 | 0 | 0 | 0 | 0 | 0 | 0 | 0 | 0 | 0 | 0 | 0 | 0 | 0 |
| 49.5030 | 9.1430  | 16.5590 | H | 0 | 0 | 0 | 0 | 0 | 0 | 0 | 0 | 0 | 0 | 0 | 0 | 0 | 0 |
| 50.6100 | 8.6330  | 14.7820 | C | 0 | 0 | 0 | 0 | 0 | 0 | 0 | 0 | 0 | 0 | 0 | 0 | 0 | 0 |
| 51.2330 | 7.9080  | 15.3040 | H | 0 | 0 | 0 | 0 | 0 | 0 | 0 | 0 | 0 | 0 | 0 | 0 | 0 | 0 |
| 48.1600 | 4.2260  | 13.0300 | C | 0 | 0 | 0 | 0 | 0 | 0 | 0 | 0 | 0 | 0 | 0 | 0 | 0 | 0 |
| 48.6680 | 3.3040  | 13.3400 | H | 0 | 0 | 0 | 0 | 0 | 0 | 0 | 0 | 0 | 0 | 0 | 0 | 0 | 0 |
| 47.5070 | 4.5160  | 13.8630 | H | 0 | 0 | 0 | 0 | 0 | 0 | 0 | 0 | 0 | 0 | 0 | 0 | 0 | 0 |
| 49.2370 | 5.2920  | 12.8250 | C | 0 | 0 | 0 | 0 | 0 | 0 | 0 | 0 | 0 | 0 | 0 | 0 | 0 | 0 |
| 48.7930 | 6.2520  | 12.5440 | H | 0 | 0 | 0 | 0 | 0 | 0 | 0 | 0 | 0 | 0 | 0 | 0 | 0 | 0 |
| 49.7810 | 5.4550  | 13.7620 | H | 0 | 0 | 0 | 0 | 0 | 0 | 0 | 0 | 0 | 0 | 0 | 0 | 0 | 0 |
| 50.2480 | 4.8740  | 11.7880 | C | 0 | 0 | 0 | 0 | 0 | 0 | 0 | 0 | 0 | 0 | 0 | 0 | 0 | 0 |
| 50.6330 | 5.9580  | 11.0500 | O | 0 | 0 | 0 | 0 | 0 | 0 | 0 | 0 | 0 | 0 | 0 | 0 | 0 | 0 |
| 51.7070 | 5.7070  | 10.1340 | C | 0 | 0 | 0 | 0 | 0 | 0 | 0 | 0 | 0 | 0 | 0 | 0 | 0 | 0 |
| 52.5150 | 5.1960  | 10.6710 | H | 0 | 0 | 0 | 0 | 0 | 0 | 0 | 0 | 0 | 0 | 0 | 0 | 0 | 0 |
| 51.3340 | 5.0400  | 9.3460  | H | 0 | 0 | 0 | 0 | 0 | 0 | 0 | 0 | 0 | 0 | 0 | 0 | 0 | 0 |
| 52.2430 | 7.0190  | 9.5020  | C | 0 | 0 | 3 | 0 | 0 | 0 | 0 | 0 | 0 | 0 | 0 | 0 | 0 | 0 |
| 51.0620 | 7.7810  | 8.8400  | C | 0 | 0 | 0 | 0 | 0 | 0 | 0 | 0 | 0 | 0 | 0 | 0 | 0 | 0 |
| 50.5920 | 7.1430  | 8.0800  | H | 0 | 0 | 0 | 0 | 0 | 0 | 0 | 0 | 0 | 0 | 0 | 0 | 0 | 0 |
| 50.2990 | 8.0580  | 9.5760  | H | 0 | 0 | 0 | 0 | 0 | 0 | 0 | 0 | 0 | 0 | 0 | 0 | 0 | 0 |
| 51.5460 | 8.9830  | 8.2140  | O | 0 | 0 | 0 | 0 | 0 | 0 | 0 | 0 | 0 | 0 | 0 | 0 | 0 | 0 |
| 50.6420 | 9.6450  | 7.4360  | C | 0 | 0 | 0 | 0 | 0 | 0 | 0 | 0 | 0 | 0 | 0 | 0 | 0 | 0 |
| 51.2920 | 10.8420 | 6.7870  | C | 0 | 0 | 0 | 0 | 0 | 0 | 0 | 0 | 0 | 0 | 0 | 0 | 0 | 0 |
| 52.3500 | 10.8870 | 7.0630  | H | 0 | 0 | 0 | 0 | 0 | 0 | 0 | 0 | 0 | 0 | 0 | 0 | 0 | 0 |
| 51.2710 | 10.6750 | 5.7040  | H | 0 | 0 | 0 | 0 | 0 | 0 | 0 | 0 | 0 | 0 | 0 | 0 | 0 | 0 |
| 50.5610 | 12.1420 | 7.1310  | C | 0 | 0 | 0 | 0 | 0 | 0 | 0 | 0 | 0 | 0 | 0 | 0 | 0 | 0 |
| 51.0350 | 12.9820 | 6.6070  | H | 0 | 0 | 0 | 0 | 0 | 0 | 0 | 0 | 0 | 0 | 0 | 0 | 0 | 0 |
| 49.5490 | 12.0540 | 6.7190  | H | 0 | 0 | 0 | 0 | 0 | 0 | 0 | 0 | 0 | 0 | 0 | 0 | 0 | 0 |
| 50.6990 | 3.7420  | 11.6670 | O | 0 | 0 | 0 | 0 | 0 | 0 | 0 | 0 | 0 | 0 | 0 | 0 | 0 | 0 |
| 49.4800 | 9.3050  | 7.2580  | O | 0 | 0 | 0 | 0 | 0 | 0 | 0 | 0 | 0 | 0 | 0 | 0 | 0 | 0 |
| 53.2890 | 6.6710  | 8.3960  | C | 0 | 0 | 0 | 0 | 0 | 0 | 0 | 0 | 0 | 0 | 0 | 0 | 0 | 0 |
| 52.7930 | 6.1040  | 7.5980  | H | 0 | 0 | 0 | 0 | 0 | 0 | 0 | 0 | 0 | 0 | 0 | 0 | 0 | 0 |
| 53.6540 | 7.5960  | 7.9300  | H | 0 | 0 | 0 | 0 | 0 | 0 | 0 | 0 | 0 | 0 | 0 | 0 | 0 | 0 |
| 52.9150 | 7.9140  | 10.5790 | C | 0 | 0 | 0 | 0 | 0 | 0 | 0 | 0 | 0 | 0 | 0 | 0 | 0 | 0 |
| 53.6470 | 7.3480  | 11.1670 | H | 0 | 0 | 0 | 0 | 0 | 0 | 0 | 0 | 0 | 0 | 0 | 0 | 0 | 0 |
| 53.4730 | 8.7250  | 10.0960 | H | 0 | 0 | 0 | 0 | 0 | 0 | 0 | 0 | 0 | 0 | 0 | 0 | 0 | 0 |
| 54.5090 | 5.8760  | 8.8500  | C | 0 | 0 | 0 | 0 | 0 | 0 | 0 | 0 | 0 | 0 | 0 | 0 | 0 | 0 |
| 54.2310 | 4.8900  | 9.2330  | H | 0 | 0 | 0 | 0 | 0 | 0 | 0 | 0 | 0 | 0 | 0 | 0 | 0 | 0 |
| 55.0750 | 6.4050  | 9.6210  | H | 0 | 0 | 0 | 0 | 0 | 0 | 0 | 0 | 0 | 0 | 0 | 0 | 0 | 0 |
| 55.1810 | 5.7160  | 8.0010  | H | 0 | 0 | 0 | 0 | 0 | 0 | 0 | 0 | 0 | 0 | 0 | 0 | 0 | 0 |
| 51.9500 | 8.5580  | 11.4300 | O | 0 | 0 | 0 | 0 | 0 | 0 | 0 | 0 | 0 | 0 | 0 | 0 | 0 | 0 |
| 51.8300 | 8.1120  | 12.7040 | C | 0 | 0 | 0 | 0 | 0 | 0 | 0 | 0 | 0 | 0 | 0 | 0 | 0 | 0 |
| 52.4680 | 7.2080  | 13.2240 | O | 0 | 0 | 0 | 0 | 0 | 0 | 0 | 0 | 0 | 0 | 0 | 0 | 0 | 0 |
| 49.4810 | 13.4330 | 8.8940  | C | 0 | 0 | 0 | 0 | 0 | 0 | 0 | 0 | 0 | 0 | 0 | 0 | 0 | 0 |
| 49.6360 | 13.8210 | 9.9090  | H | 0 | 0 | 0 | 0 | 0 | 0 | 0 | 0 | 0 | 0 | 0 | 0 | 0 | 0 |
| 49.5600 | 14.2920 | 8.2160  | H | 0 | 0 | 0 | 0 | 0 | 0 | 0 | 0 | 0 | 0 | 0 | 0 | 0 | 0 |
| 50.4960 | 12.4080 | 8.5810  | N | 0 | 0 | 3 | 0 | 0 | 0 | 0 | 0 | 0 | 0 | 0 | 0 | 0 | 0 |
| 51.8140 | 12.8140 | 9.1260  | C | 0 | 0 | 0 | 0 | 0 | 0 | 0 | 0 | 0 | 0 | 0 | 0 | 0 | 0 |
| 52.6230 | 12.4290 | 8.5020  | H | 0 | 0 | 0 | 0 | 0 | 0 | 0 | 0 | 0 | 0 | 0 | 0 | 0 | 0 |
| 51.9280 | 13.9060 | 9.1200  | H | 0 | 0 | 0 | 0 | 0 | 0 | 0 | 0 | 0 | 0 | 0 | 0 | 0 | 0 |
| 51.9830 | 12.2480 | 10.5540 | C | 0 | 0 | 0 | 0 | 0 | 0 | 0 | 0 | 0 | 0 | 0 | 0 | 0 | 0 |
| 51.1360 | 12.6100 | 11.1510 | H | 0 | 0 | 0 | 0 | 0 | 0 | 0 | 0 | 0 | 0 | 0 | 0 | 0 | 0 |
| 51.9070 | 11.1540 | 10.5300 | H | 0 | 0 | 0 | 0 | 0 | 0 | 0 | 0 | 0 | 0 | 0 | 0 | 0 | 0 |
| 53.2440 | 12.6580 | 11.2210 | N | 0 | 0 | 3 | 0 | 0 | 0 | 0 | 0 | 0 | 0 | 0 | 0 | 0 | 0 |
| 53.1140 | 12.3820 | 12.6710 | C | 0 | 0 | 0 | 0 | 0 | 0 | 0 | 0 | 0 | 0 | 0 | 0 | 0 | 0 |
| 52.2020 | 12.8650 | 13.0440 | H | 0 | 0 | 0 | 0 | 0 | 0 | 0 | 0 | 0 | 0 | 0 | 0 | 0 | 0 |
| 53.0000 | 11.3060 | 12.8540 | H | 0 | 0 | 0 | 0 | 0 | 0 | 0 | 0 | 0 | 0 | 0 | 0 | 0 | 0 |
| 48.0680 | 12.8590 | 8.8670  | C | 0 | 0 | 0 | 0 | 0 | 0 | 0 | 0 | 0 | 0 | 0 | 0 | 0 | 0 |
| 47.7620 | 12.5530 | 7.8630  | H | 0 | 0 | 0 | 0 | 0 | 0 | 0 | 0 | 0 | 0 | 0 | 0 | 0 | 0 |
| 47.9830 | 11.9930 | 9.5320  | H | 0 | 0 | 0 | 0 | 0 | 0 | 0 | 0 | 0 | 0 | 0 | 0 | 0 | 0 |
| 47.3530 | 13.6140 | 9.2110  | H | 0 | 0 | 0 | 0 | 0 | 0 | 0 | 0 | 0 | 0 | 0 | 0 | 0 | 0 |
| 54.2590 | 12.9210 | 13.5190 | C | 0 | 0 | 0 | 0 | 0 | 0 | 0 | 0 | 0 | 0 | 0 | 0 | 0 | 0 |





|    |     |   |   |   |   |   |
|----|-----|---|---|---|---|---|
| 6  | 7   | 1 | 0 | 0 | 0 | 0 |
| 6  | 8   | 1 | 0 | 0 | 0 | 0 |
| 6  | 9   | 1 | 0 | 0 | 0 | 0 |
| 9  | 10  | 1 | 0 | 0 | 0 | 0 |
| 9  | 11  | 1 | 0 | 0 | 0 | 0 |
| 9  | 12  | 1 | 0 | 0 | 0 | 0 |
| 12 | 13  | 1 | 0 | 0 | 0 | 0 |
| 12 | 35  | 1 | 0 | 0 | 0 | 0 |
| 13 | 14  | 1 | 0 | 0 | 0 | 0 |
| 13 | 15  | 1 | 0 | 0 | 0 | 0 |
| 13 | 20  | 1 | 0 | 0 | 0 | 0 |
| 16 | 17  | 1 | 0 | 0 | 0 | 0 |
| 16 | 18  | 1 | 0 | 0 | 0 | 0 |
| 16 | 19  | 1 | 0 | 0 | 0 | 0 |
| 20 | 21  | 1 | 0 | 0 | 0 | 0 |
| 20 | 22  | 1 | 0 | 0 | 0 | 0 |
| 20 | 23  | 1 | 0 | 0 | 0 | 0 |
| 24 | 25  | 1 | 0 | 0 | 0 | 0 |
| 24 | 33  | 2 | 0 | 0 | 0 | 0 |
| 24 | 71  | 1 | 0 | 0 | 0 | 0 |
| 25 | 26  | 1 | 0 | 0 | 0 | 0 |
| 25 | 27  | 2 | 0 | 0 | 0 | 0 |
| 27 | 28  | 1 | 0 | 0 | 0 | 0 |
| 27 | 29  | 1 | 0 | 0 | 0 | 0 |
| 29 | 30  | 1 | 0 | 0 | 0 | 0 |
| 29 | 31  | 2 | 0 | 0 | 0 | 0 |
| 31 | 32  | 1 | 0 | 0 | 0 | 0 |
| 31 | 33  | 1 | 0 | 0 | 0 | 0 |
| 33 | 34  | 1 | 0 | 0 | 0 | 0 |
| 35 | 36  | 1 | 0 | 0 | 0 | 0 |
| 35 | 37  | 1 | 0 | 0 | 0 | 0 |
| 35 | 38  | 1 | 0 | 0 | 0 | 0 |
| 38 | 39  | 1 | 0 | 0 | 0 | 0 |
| 38 | 40  | 1 | 0 | 0 | 0 | 0 |
| 38 | 41  | 1 | 0 | 0 | 0 | 0 |
| 41 | 42  | 1 | 0 | 0 | 0 | 0 |
| 41 | 58  | 2 | 0 | 0 | 0 | 0 |
| 42 | 43  | 1 | 0 | 0 | 0 | 0 |
| 43 | 44  | 1 | 0 | 0 | 0 | 0 |
| 43 | 45  | 1 | 0 | 0 | 0 | 0 |
| 43 | 46  | 1 | 0 | 0 | 0 | 0 |
| 46 | 47  | 1 | 0 | 0 | 0 | 0 |
| 46 | 60  | 1 | 0 | 0 | 0 | 0 |
| 46 | 63  | 1 | 0 | 0 | 0 | 0 |
| 47 | 48  | 1 | 0 | 0 | 0 | 0 |
| 47 | 49  | 1 | 0 | 0 | 0 | 0 |
| 47 | 50  | 1 | 0 | 0 | 0 | 0 |
| 50 | 51  | 1 | 0 | 0 | 0 | 0 |
| 51 | 52  | 1 | 0 | 0 | 0 | 0 |
| 51 | 59  | 2 | 0 | 0 | 0 | 0 |
| 52 | 53  | 1 | 0 | 0 | 0 | 0 |
| 52 | 54  | 1 | 0 | 0 | 0 | 0 |
| 52 | 55  | 1 | 0 | 0 | 0 | 0 |
| 55 | 56  | 1 | 0 | 0 | 0 | 0 |
| 55 | 57  | 1 | 0 | 0 | 0 | 0 |
| 55 | 76  | 1 | 0 | 0 | 0 | 0 |
| 60 | 61  | 1 | 0 | 0 | 0 | 0 |
| 60 | 62  | 1 | 0 | 0 | 0 | 0 |
| 60 | 66  | 1 | 0 | 0 | 0 | 0 |
| 63 | 64  | 1 | 0 | 0 | 0 | 0 |
| 63 | 65  | 1 | 0 | 0 | 0 | 0 |
| 63 | 70  | 1 | 0 | 0 | 0 | 0 |
| 66 | 67  | 1 | 0 | 0 | 0 | 0 |
| 66 | 68  | 1 | 0 | 0 | 0 | 0 |
| 66 | 69  | 1 | 0 | 0 | 0 | 0 |
| 70 | 71  | 1 | 0 | 0 | 0 | 0 |
| 71 | 72  | 2 | 0 | 0 | 0 | 0 |
| 73 | 74  | 1 | 0 | 0 | 0 | 0 |
| 73 | 75  | 1 | 0 | 0 | 0 | 0 |
| 73 | 76  | 1 | 0 | 0 | 0 | 0 |
| 73 | 87  | 1 | 0 | 0 | 0 | 0 |
| 76 | 77  | 1 | 0 | 0 | 0 | 0 |
| 77 | 78  | 1 | 0 | 0 | 0 | 0 |
| 77 | 79  | 1 | 0 | 0 | 0 | 0 |
| 77 | 80  | 1 | 0 | 0 | 0 | 0 |
| 80 | 81  | 1 | 0 | 0 | 0 | 0 |
| 80 | 82  | 1 | 0 | 0 | 0 | 0 |
| 80 | 83  | 1 | 0 | 0 | 0 | 0 |
| 83 | 84  | 1 | 0 | 0 | 0 | 0 |
| 83 | 106 | 1 | 0 | 0 | 0 | 0 |
| 84 | 85  | 1 | 0 | 0 | 0 | 0 |

|     |     |   |   |   |   |   |
|-----|-----|---|---|---|---|---|
| 84  | 86  | 1 | 0 | 0 | 0 | 0 |
| 84  | 91  | 1 | 0 | 0 | 0 | 0 |
| 87  | 88  | 1 | 0 | 0 | 0 | 0 |
| 87  | 89  | 1 | 0 | 0 | 0 | 0 |
| 87  | 90  | 1 | 0 | 0 | 0 | 0 |
| 91  | 92  | 1 | 0 | 0 | 0 | 0 |
| 91  | 93  | 1 | 0 | 0 | 0 | 0 |
| 91  | 94  | 1 | 0 | 0 | 0 | 0 |
| 95  | 96  | 1 | 0 | 0 | 0 | 0 |
| 95  | 104 | 2 | 0 | 0 | 0 | 0 |
| 95  | 142 | 1 | 0 | 0 | 0 | 0 |
| 96  | 97  | 1 | 0 | 0 | 0 | 0 |
| 96  | 98  | 2 | 0 | 0 | 0 | 0 |
| 98  | 99  | 1 | 0 | 0 | 0 | 0 |
| 98  | 100 | 1 | 0 | 0 | 0 | 0 |
| 100 | 101 | 1 | 0 | 0 | 0 | 0 |
| 100 | 102 | 2 | 0 | 0 | 0 | 0 |
| 102 | 103 | 1 | 0 | 0 | 0 | 0 |
| 102 | 104 | 1 | 0 | 0 | 0 | 0 |
| 104 | 105 | 1 | 0 | 0 | 0 | 0 |
| 106 | 107 | 1 | 0 | 0 | 0 | 0 |
| 106 | 108 | 1 | 0 | 0 | 0 | 0 |
| 106 | 109 | 1 | 0 | 0 | 0 | 0 |
| 109 | 110 | 1 | 0 | 0 | 0 | 0 |
| 109 | 111 | 1 | 0 | 0 | 0 | 0 |
| 109 | 112 | 1 | 0 | 0 | 0 | 0 |
| 112 | 113 | 1 | 0 | 0 | 0 | 0 |
| 112 | 129 | 2 | 0 | 0 | 0 | 0 |
| 113 | 114 | 1 | 0 | 0 | 0 | 0 |
| 114 | 115 | 1 | 0 | 0 | 0 | 0 |
| 114 | 116 | 1 | 0 | 0 | 0 | 0 |
| 114 | 117 | 1 | 0 | 0 | 0 | 0 |
| 117 | 118 | 1 | 0 | 0 | 0 | 0 |
| 117 | 131 | 1 | 0 | 0 | 0 | 0 |
| 117 | 134 | 1 | 0 | 0 | 0 | 0 |
| 118 | 119 | 1 | 0 | 0 | 0 | 0 |
| 118 | 120 | 1 | 0 | 0 | 0 | 0 |
| 118 | 121 | 1 | 0 | 0 | 0 | 0 |
| 121 | 122 | 1 | 0 | 0 | 0 | 0 |
| 122 | 123 | 1 | 0 | 0 | 0 | 0 |
| 122 | 130 | 2 | 0 | 0 | 0 | 0 |
| 123 | 124 | 1 | 0 | 0 | 0 | 0 |
| 123 | 125 | 1 | 0 | 0 | 0 | 0 |
| 123 | 126 | 1 | 0 | 0 | 0 | 0 |
| 126 | 127 | 1 | 0 | 0 | 0 | 0 |
| 126 | 128 | 1 | 0 | 0 | 0 | 0 |
| 126 | 147 | 1 | 0 | 0 | 0 | 0 |
| 131 | 132 | 1 | 0 | 0 | 0 | 0 |
| 131 | 133 | 1 | 0 | 0 | 0 | 0 |
| 131 | 137 | 1 | 0 | 0 | 0 | 0 |
| 134 | 135 | 1 | 0 | 0 | 0 | 0 |
| 134 | 136 | 1 | 0 | 0 | 0 | 0 |
| 134 | 141 | 1 | 0 | 0 | 0 | 0 |
| 137 | 138 | 1 | 0 | 0 | 0 | 0 |
| 137 | 139 | 1 | 0 | 0 | 0 | 0 |
| 137 | 140 | 1 | 0 | 0 | 0 | 0 |
| 141 | 142 | 1 | 0 | 0 | 0 | 0 |
| 142 | 143 | 2 | 0 | 0 | 0 | 0 |
| 144 | 145 | 1 | 0 | 0 | 0 | 0 |
| 144 | 146 | 1 | 0 | 0 | 0 | 0 |
| 144 | 147 | 1 | 0 | 0 | 0 | 0 |
| 144 | 158 | 1 | 0 | 0 | 0 | 0 |
| 147 | 148 | 1 | 0 | 0 | 0 | 0 |
| 148 | 149 | 1 | 0 | 0 | 0 | 0 |
| 148 | 150 | 1 | 0 | 0 | 0 | 0 |
| 148 | 151 | 1 | 0 | 0 | 0 | 0 |
| 151 | 152 | 1 | 0 | 0 | 0 | 0 |
| 151 | 153 | 1 | 0 | 0 | 0 | 0 |
| 151 | 154 | 1 | 0 | 0 | 0 | 0 |
| 154 | 155 | 1 | 0 | 0 | 0 | 0 |
| 154 | 177 | 1 | 0 | 0 | 0 | 0 |
| 155 | 156 | 1 | 0 | 0 | 0 | 0 |
| 155 | 157 | 1 | 0 | 0 | 0 | 0 |
| 155 | 162 | 1 | 0 | 0 | 0 | 0 |
| 158 | 159 | 1 | 0 | 0 | 0 | 0 |
| 158 | 160 | 1 | 0 | 0 | 0 | 0 |
| 158 | 161 | 1 | 0 | 0 | 0 | 0 |
| 162 | 163 | 1 | 0 | 0 | 0 | 0 |
| 162 | 164 | 1 | 0 | 0 | 0 | 0 |
| 162 | 165 | 1 | 0 | 0 | 0 | 0 |
| 166 | 167 | 1 | 0 | 0 | 0 | 0 |

|        |   |   |   |   |   |
|--------|---|---|---|---|---|
| 166175 | 2 | 0 | 0 | 0 | 0 |
| 166213 | 1 | 0 | 0 | 0 | 0 |
| 167168 | 1 | 0 | 0 | 0 | 0 |
| 167169 | 2 | 0 | 0 | 0 | 0 |
| 169170 | 1 | 0 | 0 | 0 | 0 |
| 169171 | 1 | 0 | 0 | 0 | 0 |
| 171172 | 1 | 0 | 0 | 0 | 0 |
| 171173 | 2 | 0 | 0 | 0 | 0 |
| 173174 | 1 | 0 | 0 | 0 | 0 |
| 173175 | 1 | 0 | 0 | 0 | 0 |
| 175176 | 1 | 0 | 0 | 0 | 0 |
| 177178 | 1 | 0 | 0 | 0 | 0 |
| 177179 | 1 | 0 | 0 | 0 | 0 |
| 177180 | 1 | 0 | 0 | 0 | 0 |
| 180181 | 1 | 0 | 0 | 0 | 0 |
| 180182 | 1 | 0 | 0 | 0 | 0 |
| 180183 | 1 | 0 | 0 | 0 | 0 |
| 183184 | 1 | 0 | 0 | 0 | 0 |
| 183200 | 2 | 0 | 0 | 0 | 0 |
| 184185 | 1 | 0 | 0 | 0 | 0 |
| 185186 | 1 | 0 | 0 | 0 | 0 |
| 185187 | 1 | 0 | 0 | 0 | 0 |
| 185188 | 1 | 0 | 0 | 0 | 0 |
| 188189 | 1 | 0 | 0 | 0 | 0 |
| 188202 | 1 | 0 | 0 | 0 | 0 |
| 188205 | 1 | 0 | 0 | 0 | 0 |
| 189190 | 1 | 0 | 0 | 0 | 0 |
| 189191 | 1 | 0 | 0 | 0 | 0 |
| 189192 | 1 | 0 | 0 | 0 | 0 |
| 192193 | 1 | 0 | 0 | 0 | 0 |
| 193194 | 1 | 0 | 0 | 0 | 0 |
| 193201 | 2 | 0 | 0 | 0 | 0 |
| 194195 | 1 | 0 | 0 | 0 | 0 |
| 194196 | 1 | 0 | 0 | 0 | 0 |
| 194197 | 1 | 0 | 0 | 0 | 0 |
| 197198 | 1 | 0 | 0 | 0 | 0 |
| 197199 | 1 | 0 | 0 | 0 | 0 |
| 197218 | 1 | 0 | 0 | 0 | 0 |
| 202203 | 1 | 0 | 0 | 0 | 0 |
| 202204 | 1 | 0 | 0 | 0 | 0 |
| 202208 | 1 | 0 | 0 | 0 | 0 |
| 205206 | 1 | 0 | 0 | 0 | 0 |
| 205207 | 1 | 0 | 0 | 0 | 0 |
| 205212 | 1 | 0 | 0 | 0 | 0 |
| 208209 | 1 | 0 | 0 | 0 | 0 |
| 208210 | 1 | 0 | 0 | 0 | 0 |
| 208211 | 1 | 0 | 0 | 0 | 0 |
| 212213 | 1 | 0 | 0 | 0 | 0 |
| 213214 | 2 | 0 | 0 | 0 | 0 |
| 215216 | 1 | 0 | 0 | 0 | 0 |
| 215217 | 1 | 0 | 0 | 0 | 0 |
| 215218 | 1 | 0 | 0 | 0 | 0 |
| 215229 | 1 | 0 | 0 | 0 | 0 |
| 218219 | 1 | 0 | 0 | 0 | 0 |
| 219220 | 1 | 0 | 0 | 0 | 0 |
| 219221 | 1 | 0 | 0 | 0 | 0 |
| 219222 | 1 | 0 | 0 | 0 | 0 |
| 222223 | 1 | 0 | 0 | 0 | 0 |
| 222224 | 1 | 0 | 0 | 0 | 0 |
| 222225 | 1 | 0 | 0 | 0 | 0 |
| 225226 | 1 | 0 | 0 | 0 | 0 |
| 225248 | 1 | 0 | 0 | 0 | 0 |
| 226227 | 1 | 0 | 0 | 0 | 0 |
| 226228 | 1 | 0 | 0 | 0 | 0 |
| 226233 | 1 | 0 | 0 | 0 | 0 |
| 229230 | 1 | 0 | 0 | 0 | 0 |
| 229231 | 1 | 0 | 0 | 0 | 0 |
| 229232 | 1 | 0 | 0 | 0 | 0 |
| 233234 | 1 | 0 | 0 | 0 | 0 |
| 233235 | 1 | 0 | 0 | 0 | 0 |
| 233236 | 1 | 0 | 0 | 0 | 0 |
| 237238 | 1 | 0 | 0 | 0 | 0 |
| 237246 | 2 | 0 | 0 | 0 | 0 |
| 237284 | 1 | 0 | 0 | 0 | 0 |
| 238239 | 1 | 0 | 0 | 0 | 0 |
| 238240 | 2 | 0 | 0 | 0 | 0 |
| 240241 | 1 | 0 | 0 | 0 | 0 |
| 240242 | 1 | 0 | 0 | 0 | 0 |
| 242243 | 1 | 0 | 0 | 0 | 0 |
| 242244 | 2 | 0 | 0 | 0 | 0 |
| 244245 | 1 | 0 | 0 | 0 | 0 |

|        |   |   |   |   |   |
|--------|---|---|---|---|---|
| 244246 | 1 | 0 | 0 | 0 | 0 |
| 246247 | 1 | 0 | 0 | 0 | 0 |
| 248249 | 1 | 0 | 0 | 0 | 0 |
| 248250 | 1 | 0 | 0 | 0 | 0 |
| 248251 | 1 | 0 | 0 | 0 | 0 |
| 251252 | 1 | 0 | 0 | 0 | 0 |
| 251253 | 1 | 0 | 0 | 0 | 0 |
| 251254 | 1 | 0 | 0 | 0 | 0 |
| 254255 | 1 | 0 | 0 | 0 | 0 |
| 254271 | 2 | 0 | 0 | 0 | 0 |
| 255256 | 1 | 0 | 0 | 0 | 0 |
| 256257 | 1 | 0 | 0 | 0 | 0 |
| 256258 | 1 | 0 | 0 | 0 | 0 |
| 256259 | 1 | 0 | 0 | 0 | 0 |
| 259260 | 1 | 0 | 0 | 0 | 0 |
| 259273 | 1 | 0 | 0 | 0 | 0 |
| 259276 | 1 | 0 | 0 | 0 | 0 |
| 260261 | 1 | 0 | 0 | 0 | 0 |
| 260262 | 1 | 0 | 0 | 0 | 0 |
| 260263 | 1 | 0 | 0 | 0 | 0 |
| 263264 | 1 | 0 | 0 | 0 | 0 |
| 264265 | 1 | 0 | 0 | 0 | 0 |
| 264272 | 2 | 0 | 0 | 0 | 0 |
| 265266 | 1 | 0 | 0 | 0 | 0 |
| 265267 | 1 | 0 | 0 | 0 | 0 |
| 265268 | 1 | 0 | 0 | 0 | 0 |
| 268269 | 1 | 0 | 0 | 0 | 0 |
| 268270 | 1 | 0 | 0 | 0 | 0 |
| 268289 | 1 | 0 | 0 | 0 | 0 |
| 273274 | 1 | 0 | 0 | 0 | 0 |
| 273275 | 1 | 0 | 0 | 0 | 0 |
| 273279 | 1 | 0 | 0 | 0 | 0 |
| 276277 | 1 | 0 | 0 | 0 | 0 |
| 276278 | 1 | 0 | 0 | 0 | 0 |
| 276283 | 1 | 0 | 0 | 0 | 0 |
| 279280 | 1 | 0 | 0 | 0 | 0 |
| 279281 | 1 | 0 | 0 | 0 | 0 |
| 279282 | 1 | 0 | 0 | 0 | 0 |
| 283284 | 1 | 0 | 0 | 0 | 0 |
| 284285 | 2 | 0 | 0 | 0 | 0 |
| 286287 | 1 | 0 | 0 | 0 | 0 |
| 286288 | 1 | 0 | 0 | 0 | 0 |
| 286289 | 1 | 0 | 0 | 0 | 0 |
| 286300 | 1 | 0 | 0 | 0 | 0 |
| 289290 | 1 | 0 | 0 | 0 | 0 |
| 290291 | 1 | 0 | 0 | 0 | 0 |
| 290292 | 1 | 0 | 0 | 0 | 0 |
| 290293 | 1 | 0 | 0 | 0 | 0 |
| 293294 | 1 | 0 | 0 | 0 | 0 |
| 293295 | 1 | 0 | 0 | 0 | 0 |
| 293296 | 1 | 0 | 0 | 0 | 0 |
| 296297 | 1 | 0 | 0 | 0 | 0 |
| 296319 | 1 | 0 | 0 | 0 | 0 |
| 297298 | 1 | 0 | 0 | 0 | 0 |
| 297299 | 1 | 0 | 0 | 0 | 0 |
| 297304 | 1 | 0 | 0 | 0 | 0 |
| 300301 | 1 | 0 | 0 | 0 | 0 |
| 300302 | 1 | 0 | 0 | 0 | 0 |
| 300303 | 1 | 0 | 0 | 0 | 0 |
| 304305 | 1 | 0 | 0 | 0 | 0 |
| 304306 | 1 | 0 | 0 | 0 | 0 |
| 304307 | 1 | 0 | 0 | 0 | 0 |
| 308309 | 1 | 0 | 0 | 0 | 0 |
| 308317 | 2 | 0 | 0 | 0 | 0 |
| 308355 | 1 | 0 | 0 | 0 | 0 |
| 309310 | 1 | 0 | 0 | 0 | 0 |
| 309311 | 2 | 0 | 0 | 0 | 0 |
| 311312 | 1 | 0 | 0 | 0 | 0 |
| 311313 | 1 | 0 | 0 | 0 | 0 |
| 313314 | 1 | 0 | 0 | 0 | 0 |
| 313315 | 2 | 0 | 0 | 0 | 0 |
| 315316 | 1 | 0 | 0 | 0 | 0 |
| 315317 | 1 | 0 | 0 | 0 | 0 |
| 317318 | 1 | 0 | 0 | 0 | 0 |
| 319320 | 1 | 0 | 0 | 0 | 0 |
| 319321 | 1 | 0 | 0 | 0 | 0 |
| 319322 | 1 | 0 | 0 | 0 | 0 |
| 322323 | 1 | 0 | 0 | 0 | 0 |
| 322324 | 1 | 0 | 0 | 0 | 0 |
| 322325 | 1 | 0 | 0 | 0 | 0 |
| 325326 | 1 | 0 | 0 | 0 | 0 |

```

325342 2 0 0 0 0
326327 1 0 0 0 0
327328 1 0 0 0 0
327329 1 0 0 0 0
327330 1 0 0 0 0
330331 1 0 0 0 0
330344 1 0 0 0 0
330347 1 0 0 0 0
331332 1 0 0 0 0
331333 1 0 0 0 0
331334 1 0 0 0 0
334335 1 0 0 0 0
335336 1 0 0 0 0
335343 2 0 0 0 0
336337 1 0 0 0 0
336338 1 0 0 0 0
336339 1 0 0 0 0
339340 1 0 0 0 0
339341 1 0 0 0 0
339360 1 0 0 0 0
344345 1 0 0 0 0
344346 1 0 0 0 0
344350 1 0 0 0 0
347348 1 0 0 0 0
347349 1 0 0 0 0
347354 1 0 0 0 0
350351 1 0 0 0 0
350352 1 0 0 0 0
350353 1 0 0 0 0
354355 1 0 0 0 0
355356 2 0 0 0 0
357358 1 0 0 0 0
357359 1 0 0 0 0
357360 1 0 0 0 0
357372 1 0 0 0 0
360361 1 0 0 0 0
361362 1 0 0 0 0
361363 1 0 0 0 0
361364 1 0 0 0 0
364365 1 0 0 0 0
364366 1 0 0 0 0
364367 1 0 0 0 0
367368 1 0 0 0 0
367369 1 0 0 0 0
369370 1 0 0 0 0
369371 1 0 0 0 0
369376 1 0 0 0 0
372373 1 0 0 0 0
372374 1 0 0 0 0
372375 1 0 0 0 0
376377 1 0 0 0 0
376378 1 0 0 0 0
376379 1 0 0 0 0

```

```

M END
> <NAME>
AA61_12

```

```

$$$$
AA94_12
MOE2012 3D

```

```

337347 0 0 1 0 0 0 0 0 0999 V2000
26.9270 3.2970 17.3620 N 0 0 0 0 0 0 0 0 0 0 0 0 0 0 0 0
26.5980 4.0110 16.2450 C 0 0 0 0 0 0 0 0 0 0 0 0 0 0 0 0
25.6130 3.9840 15.7980 H 0 0 0 0 0 0 0 0 0 0 0 0 0 0 0 0
27.7510 4.6810 15.9040 C 0 0 0 0 0 0 0 0 0 0 0 0 0 0 0 0
27.9030 5.3520 15.0700 H 0 0 0 0 0 0 0 0 0 0 0 0 0 0 0 0
28.7630 4.3970 16.7870 N 0 0 0 0 0 0 0 0 0 0 0 0 0 0 0 0
28.2350 3.5610 17.6530 C 0 0 0 0 0 0 0 0 0 0 0 0 0 0 0 0
28.7500 3.1230 18.4980 H 0 0 0 0 0 0 0 0 0 0 0 0 0 0 0 0
26.0440 2.4210 18.1080 C 0 0 0 0 0 0 0 0 0 0 0 0 0 0 0 0
26.3700 2.4460 19.1550 H 0 0 0 0 0 0 0 0 0 0 0 0 0 0 0 0
25.0370 2.8540 18.0640 H 0 0 0 0 0 0 0 0 0 0 0 0 0 0 0 0
26.0520 0.9890 17.5630 C 0 0 0 0 0 0 0 0 0 0 0 0 0 0 0 0
25.7160 1.0000 16.5200 H 0 0 0 0 0 0 0 0 0 0 0 0 0 0 0 0
27.0770 0.6000 17.5750 H 0 0 0 0 0 0 0 0 0 0 0 0 0 0 0 0
25.1780 0.1310 18.3750 N 0 0 3 0 0 0 0 0 0 0 0 0 0 0 0 0
25.5170 0.1400 19.3400 H 0 0 0 0 0 0 0 0 0 0 0 0 0 0 0 0
16.6500 0.6880 17.9470 C 0 0 0 0 0 0 0 0 0 0 0 0 0 0 0 0
17.6550 1.6490 18.1160 C 0 0 0 0 0 0 0 0 0 0 0 0 0 0 0 0
18.5910 1.5930 17.5650 H 0 0 0 0 0 0 0 0 0 0 0 0 0 0 0 0

```









|         |         |          |   |   |   |   |   |   |   |   |   |   |   |   |   |   |   |   |   |
|---------|---------|----------|---|---|---|---|---|---|---|---|---|---|---|---|---|---|---|---|---|
| 39.3890 | 10.9060 | -5.0680  | N | 0 | 0 | 0 | 0 | 0 | 0 | 0 | 0 | 0 | 0 | 0 | 0 | 0 | 0 | 0 | 0 |
| 40.1410 | 10.0960 | -5.7810  | C | 0 | 0 | 0 | 0 | 0 | 0 | 0 | 0 | 0 | 0 | 0 | 0 | 0 | 0 | 0 | 0 |
| 40.2170 | 9.0240  | -5.6460  | H | 0 | 0 | 0 | 0 | 0 | 0 | 0 | 0 | 0 | 0 | 0 | 0 | 0 | 0 | 0 | 0 |
| 41.7660 | 10.1930 | -7.6920  | C | 0 | 0 | 0 | 0 | 0 | 0 | 0 | 0 | 0 | 0 | 0 | 0 | 0 | 0 | 0 | 0 |
| 41.3420 | 9.2310  | -7.9940  | H | 0 | 0 | 0 | 0 | 0 | 0 | 0 | 0 | 0 | 0 | 0 | 0 | 0 | 0 | 0 | 0 |
| 41.7740 | 10.8390 | -8.5790  | H | 0 | 0 | 0 | 0 | 0 | 0 | 0 | 0 | 0 | 0 | 0 | 0 | 0 | 0 | 0 | 0 |
| 43.1810 | 10.0620 | -7.1090  | C | 0 | 0 | 0 | 0 | 0 | 0 | 0 | 0 | 0 | 0 | 0 | 0 | 0 | 0 | 0 | 0 |
| 43.4990 | 11.0730 | -6.8280  | H | 0 | 0 | 0 | 0 | 0 | 0 | 0 | 0 | 0 | 0 | 0 | 0 | 0 | 0 | 0 | 0 |
| 43.1680 | 9.4930  | -6.1710  | H | 0 | 0 | 0 | 0 | 0 | 0 | 0 | 0 | 0 | 0 | 0 | 0 | 0 | 0 | 0 | 0 |
| 44.1380 | 9.4850  | -8.0710  | N | 0 | 0 | 3 | 0 | 0 | 0 | 0 | 0 | 0 | 0 | 0 | 0 | 0 | 0 | 0 | 0 |
| 41.5660 | 15.1780 | -14.2150 | C | 0 | 0 | 0 | 0 | 0 | 0 | 0 | 0 | 0 | 0 | 0 | 0 | 0 | 0 | 0 | 0 |
| 40.8340 | 14.6570 | -13.1410 | C | 0 | 0 | 0 | 0 | 0 | 0 | 0 | 0 | 0 | 0 | 0 | 0 | 0 | 0 | 0 | 0 |
| 41.3240 | 14.1350 | -12.3230 | H | 0 | 0 | 0 | 0 | 0 | 0 | 0 | 0 | 0 | 0 | 0 | 0 | 0 | 0 | 0 | 0 |
| 39.4450 | 14.8020 | -13.1040 | C | 0 | 0 | 0 | 0 | 0 | 0 | 0 | 0 | 0 | 0 | 0 | 0 | 0 | 0 | 0 | 0 |
| 38.8790 | 14.3950 | -12.2700 | H | 0 | 0 | 0 | 0 | 0 | 0 | 0 | 0 | 0 | 0 | 0 | 0 | 0 | 0 | 0 | 0 |
| 38.7830 | 15.4650 | -14.1360 | C | 0 | 0 | 0 | 0 | 0 | 0 | 0 | 0 | 0 | 0 | 0 | 0 | 0 | 0 | 0 | 0 |
| 37.7030 | 15.5760 | -14.1040 | H | 0 | 0 | 0 | 0 | 0 | 0 | 0 | 0 | 0 | 0 | 0 | 0 | 0 | 0 | 0 | 0 |
| 39.5060 | 15.9840 | -15.2090 | C | 0 | 0 | 0 | 0 | 0 | 0 | 0 | 0 | 0 | 0 | 0 | 0 | 0 | 0 | 0 | 0 |
| 38.9880 | 16.5000 | -16.0140 | H | 0 | 0 | 0 | 0 | 0 | 0 | 0 | 0 | 0 | 0 | 0 | 0 | 0 | 0 | 0 | 0 |
| 40.8940 | 15.8410 | -15.2500 | C | 0 | 0 | 0 | 0 | 0 | 0 | 0 | 0 | 0 | 0 | 0 | 0 | 0 | 0 | 0 | 0 |
| 41.4450 | 16.2540 | -16.0930 | H | 0 | 0 | 0 | 0 | 0 | 0 | 0 | 0 | 0 | 0 | 0 | 0 | 0 | 0 | 0 | 0 |
| 45.5400 | 9.7750  | -7.7160  | C | 0 | 0 | 0 | 0 | 0 | 0 | 0 | 0 | 0 | 0 | 0 | 0 | 0 | 0 | 0 | 0 |
| 46.2090 | 9.0880  | -8.2520  | H | 0 | 0 | 0 | 0 | 0 | 0 | 0 | 0 | 0 | 0 | 0 | 0 | 0 | 0 | 0 | 0 |
| 45.7180 | 9.6100  | -6.6460  | H | 0 | 0 | 0 | 0 | 0 | 0 | 0 | 0 | 0 | 0 | 0 | 0 | 0 | 0 | 0 | 0 |
| 45.9590 | 11.1970 | -8.0900  | C | 0 | 0 | 0 | 0 | 0 | 0 | 0 | 0 | 0 | 0 | 0 | 0 | 0 | 0 | 0 | 0 |
| 45.3810 | 11.9440 | -7.5360  | H | 0 | 0 | 0 | 0 | 0 | 0 | 0 | 0 | 0 | 0 | 0 | 0 | 0 | 0 | 0 | 0 |
| 47.0100 | 11.3650 | -7.8270  | H | 0 | 0 | 0 | 0 | 0 | 0 | 0 | 0 | 0 | 0 | 0 | 0 | 0 | 0 | 0 | 0 |
| 45.8230 | 11.4310 | -9.5740  | C | 0 | 0 | 0 | 0 | 0 | 0 | 0 | 0 | 0 | 0 | 0 | 0 | 0 | 0 | 0 | 0 |
| 45.0000 | 12.4930 | -9.8050  | O | 0 | 0 | 0 | 0 | 0 | 0 | 0 | 0 | 0 | 0 | 0 | 0 | 0 | 0 | 0 | 0 |
| 44.6880 | 12.8000 | -11.1770 | C | 0 | 0 | 0 | 0 | 0 | 0 | 0 | 0 | 0 | 0 | 0 | 0 | 0 | 0 | 0 | 0 |
| 44.9020 | 11.9510 | -11.8380 | H | 0 | 0 | 0 | 0 | 0 | 0 | 0 | 0 | 0 | 0 | 0 | 0 | 0 | 0 | 0 | 0 |
| 43.6020 | 12.9400 | -11.2060 | H | 0 | 0 | 0 | 0 | 0 | 0 | 0 | 0 | 0 | 0 | 0 | 0 | 0 | 0 | 0 | 0 |
| 45.4180 | 14.0840 | -11.6700 | C | 0 | 0 | 3 | 0 | 0 | 0 | 0 | 0 | 0 | 0 | 0 | 0 | 0 | 0 | 0 | 0 |
| 45.0120 | 15.2600 | -10.7420 | C | 0 | 0 | 0 | 0 | 0 | 0 | 0 | 0 | 0 | 0 | 0 | 0 | 0 | 0 | 0 | 0 |
| 43.9220 | 15.2930 | -10.6260 | H | 0 | 0 | 0 | 0 | 0 | 0 | 0 | 0 | 0 | 0 | 0 | 0 | 0 | 0 | 0 | 0 |
| 45.4640 | 15.1370 | -9.7500  | H | 0 | 0 | 0 | 0 | 0 | 0 | 0 | 0 | 0 | 0 | 0 | 0 | 0 | 0 | 0 | 0 |
| 45.4500 | 16.5110 | -11.2990 | O | 0 | 0 | 0 | 0 | 0 | 0 | 0 | 0 | 0 | 0 | 0 | 0 | 0 | 0 | 0 | 0 |
| 45.1040 | 17.6260 | -10.5950 | C | 0 | 0 | 0 | 0 | 0 | 0 | 0 | 0 | 0 | 0 | 0 | 0 | 0 | 0 | 0 | 0 |
| 45.6450 | 18.8540 | -11.2910 | C | 0 | 0 | 0 | 0 | 0 | 0 | 0 | 0 | 0 | 0 | 0 | 0 | 0 | 0 | 0 | 0 |
| 46.6870 | 18.6580 | -11.5710 | H | 0 | 0 | 0 | 0 | 0 | 0 | 0 | 0 | 0 | 0 | 0 | 0 | 0 | 0 | 0 | 0 |
| 45.0560 | 19.0200 | -12.1990 | H | 0 | 0 | 0 | 0 | 0 | 0 | 0 | 0 | 0 | 0 | 0 | 0 | 0 | 0 | 0 | 0 |
| 45.5850 | 20.0730 | -10.3690 | C | 0 | 0 | 0 | 0 | 0 | 0 | 0 | 0 | 0 | 0 | 0 | 0 | 0 | 0 | 0 | 0 |
| 44.5490 | 20.3000 | -10.0910 | H | 0 | 0 | 0 | 0 | 0 | 0 | 0 | 0 | 0 | 0 | 0 | 0 | 0 | 0 | 0 | 0 |
| 46.0950 | 19.8290 | -9.4290  | H | 0 | 0 | 0 | 0 | 0 | 0 | 0 | 0 | 0 | 0 | 0 | 0 | 0 | 0 | 0 | 0 |
| 46.3940 | 10.7700 | -10.4320 | O | 0 | 0 | 0 | 0 | 0 | 0 | 0 | 0 | 0 | 0 | 0 | 0 | 0 | 0 | 0 | 0 |
| 44.4440 | 17.6310 | -9.5660  | O | 0 | 0 | 0 | 0 | 0 | 0 | 0 | 0 | 0 | 0 | 0 | 0 | 0 | 0 | 0 | 0 |
| 46.9560 | 13.8330 | -11.6260 | C | 0 | 0 | 0 | 0 | 0 | 0 | 0 | 0 | 0 | 0 | 0 | 0 | 0 | 0 | 0 | 0 |
| 47.2650 | 13.6360 | -10.5920 | H | 0 | 0 | 0 | 0 | 0 | 0 | 0 | 0 | 0 | 0 | 0 | 0 | 0 | 0 | 0 | 0 |
| 47.1770 | 12.9180 | -12.1920 | H | 0 | 0 | 0 | 0 | 0 | 0 | 0 | 0 | 0 | 0 | 0 | 0 | 0 | 0 | 0 | 0 |
| 44.9640 | 14.3700 | -13.1250 | C | 0 | 0 | 0 | 0 | 0 | 0 | 0 | 0 | 0 | 0 | 0 | 0 | 0 | 0 | 0 | 0 |
| 45.4350 | 15.2790 | -13.5130 | H | 0 | 0 | 0 | 0 | 0 | 0 | 0 | 0 | 0 | 0 | 0 | 0 | 0 | 0 | 0 | 0 |
| 45.2340 | 13.5320 | -13.7790 | H | 0 | 0 | 0 | 0 | 0 | 0 | 0 | 0 | 0 | 0 | 0 | 0 | 0 | 0 | 0 | 0 |
| 47.8650 | 14.9310 | -12.1660 | C | 0 | 0 | 0 | 0 | 0 | 0 | 0 | 0 | 0 | 0 | 0 | 0 | 0 | 0 | 0 | 0 |
| 47.8080 | 15.8400 | -11.5630 | H | 0 | 0 | 0 | 0 | 0 | 0 | 0 | 0 | 0 | 0 | 0 | 0 | 0 | 0 | 0 | 0 |
| 47.6390 | 15.1780 | -13.2070 | H | 0 | 0 | 0 | 0 | 0 | 0 | 0 | 0 | 0 | 0 | 0 | 0 | 0 | 0 | 0 | 0 |
| 48.9060 | 14.5910 | -12.1330 | H | 0 | 0 | 0 | 0 | 0 | 0 | 0 | 0 | 0 | 0 | 0 | 0 | 0 | 0 | 0 | 0 |
| 43.5330 | 14.5230 | -13.1600 | O | 0 | 0 | 0 | 0 | 0 | 0 | 0 | 0 | 0 | 0 | 0 | 0 | 0 | 0 | 0 | 0 |
| 43.0300 | 15.0540 | -14.3040 | C | 0 | 0 | 0 | 0 | 0 | 0 | 0 | 0 | 0 | 0 | 0 | 0 | 0 | 0 | 0 | 0 |
| 43.6770 | 15.4050 | -15.2800 | O | 0 | 0 | 0 | 0 | 0 | 0 | 0 | 0 | 0 | 0 | 0 | 0 | 0 | 0 | 0 | 0 |
| 45.3560 | 24.0410 | -13.2740 | N | 0 | 0 | 0 | 0 | 0 | 0 | 0 | 0 | 0 | 0 | 0 | 0 | 0 | 0 | 0 | 0 |
| 44.2930 | 24.8580 | -13.0150 | C | 0 | 0 | 0 | 0 | 0 | 0 | 0 | 0 | 0 | 0 | 0 | 0 | 0 | 0 | 0 | 0 |
| 43.8980 | 25.0100 | -12.0190 | H | 0 | 0 | 0 | 0 | 0 | 0 | 0 | 0 | 0 | 0 | 0 | 0 | 0 | 0 | 0 | 0 |
| 43.9300 | 25.3640 | -14.2420 | C | 0 | 0 | 0 | 0 | 0 | 0 | 0 | 0 | 0 | 0 | 0 | 0 | 0 | 0 | 0 | 0 |
| 43.1300 | 26.0570 | -14.4630 | H | 0 | 0 | 0 | 0 | 0 | 0 | 0 | 0 | 0 | 0 | 0 | 0 | 0 | 0 | 0 | 0 |
| 44.7420 | 24.8740 | -15.2330 | N | 0 | 0 | 0 | 0 | 0 | 0 | 0 | 0 | 0 | 0 | 0 | 0 | 0 | 0 | 0 | 0 |
| 45.5890 | 24.0770 | -14.6190 | C | 0 | 0 | 0 | 0 | 0 | 0 | 0 | 0 | 0 | 0 | 0 | 0 | 0 | 0 | 0 | 0 |
| 46.3820 | 23.5160 | -15.0960 | H | 0 | 0 | 0 | 0 | 0 | 0 | 0 | 0 | 0 | 0 | 0 | 0 | 0 | 0 | 0 | 0 |
| 46.1120 | 23.2840 | -12.2960 | C | 0 | 0 | 0 | 0 | 0 | 0 | 0 | 0 | 0 | 0 | 0 | 0 | 0 | 0 | 0 | 0 |
| 47.1200 | 23.1320 | -12.7010 | H | 0 | 0 | 0 | 0 | 0 | 0 | 0 | 0 | 0 | 0 | 0 | 0 | 0 | 0 | 0 | 0 |
| 46.2080 | 23.9180 | -11.4050 | H | 0 | 0 | 0 | 0 | 0 | 0 | 0 | 0 | 0 | 0 | 0 | 0 | 0 | 0 | 0 | 0 |
| 45.4550 | 21.9440 | -11.9460 | C | 0 | 0 | 0 | 0 | 0 | 0 | 0 | 0 | 0 | 0 | 0 | 0 | 0 | 0 | 0 | 0 |
| 44.4370 | 22.1280 | -11.5820 | H | 0 | 0 | 0 | 0 | 0 | 0 | 0 | 0 | 0 | 0 | 0 | 0 | 0 | 0 | 0 | 0 |
| 45.3780 | 21.3230 | -12.8460 | H | 0 | 0 | 0 | 0 | 0 | 0 | 0 | 0 | 0 | 0 | 0 | 0 | 0 | 0 | 0 | 0 |
| 46.2430 | 21.2640 | -10.9160 | N | 0 | 0 | 3 | 0 | 0 | 0 | 0 | 0 | 0 | 0 | 0 | 0 | 0 | 0 | 0 | 0 |
| 47.1670 | 21.0210 | -11.2720 | H | 0 | 0 | 0 | 0 | 0 | 0 | 0 | 0 | 0 | 0 | 0 | 0 | 0 | 0 | 0 | 0 |
| 1       | 2       | 1        | 0 | 0 | 0 | 0 |   |   |   |   |   |   |   |   |   |   |   |   |   |
| 1       | 7       | 1        | 0 | 0 | 0 | 0 |   |   |   |   |   |   |   |   |   |   |   |   |   |
| 1       | 9       | 1        | 0 | 0 | 0 | 0 |   |   |   |   |   |   |   |   |   |   |   |   |   |
| 2       | 3       | 1        | 0 | 0 | 0 | 0 |   |   |   |   |   |   |   |   |   |   |   |   |   |
| 2       | 4       | 2        | 0 | 0 | 0 | 0 |   |   |   |   |   |   |   |   |   |   |   |   |   |
| 4       | 5       | 1        | 0 | 0 | 0 | 0 |   |   |   |   |   |   |   |   |   |   |   |   |   |

|    |     |   |   |   |   |   |
|----|-----|---|---|---|---|---|
| 4  | 6   | 1 | 0 | 0 | 0 | 0 |
| 6  | 7   | 2 | 0 | 0 | 0 | 0 |
| 7  | 8   | 1 | 0 | 0 | 0 | 0 |
| 9  | 10  | 1 | 0 | 0 | 0 | 0 |
| 9  | 11  | 1 | 0 | 0 | 0 | 0 |
| 9  | 12  | 1 | 0 | 0 | 0 | 0 |
| 12 | 13  | 1 | 0 | 0 | 0 | 0 |
| 12 | 14  | 1 | 0 | 0 | 0 | 0 |
| 12 | 15  | 1 | 0 | 0 | 0 | 0 |
| 15 | 16  | 1 | 0 | 0 | 0 | 0 |
| 15 | 28  | 1 | 0 | 0 | 0 | 0 |
| 17 | 18  | 1 | 0 | 0 | 0 | 0 |
| 17 | 26  | 2 | 0 | 0 | 0 | 0 |
| 17 | 64  | 1 | 0 | 0 | 0 | 0 |
| 18 | 19  | 1 | 0 | 0 | 0 | 0 |
| 18 | 20  | 2 | 0 | 0 | 0 | 0 |
| 20 | 21  | 1 | 0 | 0 | 0 | 0 |
| 20 | 22  | 1 | 0 | 0 | 0 | 0 |
| 22 | 23  | 1 | 0 | 0 | 0 | 0 |
| 22 | 24  | 2 | 0 | 0 | 0 | 0 |
| 24 | 25  | 1 | 0 | 0 | 0 | 0 |
| 24 | 26  | 1 | 0 | 0 | 0 | 0 |
| 26 | 27  | 1 | 0 | 0 | 0 | 0 |
| 28 | 29  | 1 | 0 | 0 | 0 | 0 |
| 28 | 30  | 1 | 0 | 0 | 0 | 0 |
| 28 | 31  | 1 | 0 | 0 | 0 | 0 |
| 31 | 32  | 1 | 0 | 0 | 0 | 0 |
| 31 | 33  | 1 | 0 | 0 | 0 | 0 |
| 31 | 34  | 1 | 0 | 0 | 0 | 0 |
| 34 | 35  | 1 | 0 | 0 | 0 | 0 |
| 34 | 51  | 2 | 0 | 0 | 0 | 0 |
| 35 | 36  | 1 | 0 | 0 | 0 | 0 |
| 36 | 37  | 1 | 0 | 0 | 0 | 0 |
| 36 | 38  | 1 | 0 | 0 | 0 | 0 |
| 36 | 39  | 1 | 0 | 0 | 0 | 0 |
| 39 | 40  | 1 | 0 | 0 | 0 | 0 |
| 39 | 53  | 1 | 0 | 0 | 0 | 0 |
| 39 | 56  | 1 | 0 | 0 | 0 | 0 |
| 40 | 41  | 1 | 0 | 0 | 0 | 0 |
| 40 | 42  | 1 | 0 | 0 | 0 | 0 |
| 40 | 43  | 1 | 0 | 0 | 0 | 0 |
| 43 | 44  | 1 | 0 | 0 | 0 | 0 |
| 44 | 45  | 1 | 0 | 0 | 0 | 0 |
| 44 | 52  | 2 | 0 | 0 | 0 | 0 |
| 45 | 46  | 1 | 0 | 0 | 0 | 0 |
| 45 | 47  | 1 | 0 | 0 | 0 | 0 |
| 45 | 48  | 1 | 0 | 0 | 0 | 0 |
| 48 | 49  | 1 | 0 | 0 | 0 | 0 |
| 48 | 50  | 1 | 0 | 0 | 0 | 0 |
| 48 | 80  | 1 | 0 | 0 | 0 | 0 |
| 53 | 54  | 1 | 0 | 0 | 0 | 0 |
| 53 | 55  | 1 | 0 | 0 | 0 | 0 |
| 53 | 59  | 1 | 0 | 0 | 0 | 0 |
| 56 | 57  | 1 | 0 | 0 | 0 | 0 |
| 56 | 58  | 1 | 0 | 0 | 0 | 0 |
| 56 | 63  | 1 | 0 | 0 | 0 | 0 |
| 59 | 60  | 1 | 0 | 0 | 0 | 0 |
| 59 | 61  | 1 | 0 | 0 | 0 | 0 |
| 59 | 62  | 1 | 0 | 0 | 0 | 0 |
| 63 | 64  | 1 | 0 | 0 | 0 | 0 |
| 64 | 65  | 2 | 0 | 0 | 0 | 0 |
| 66 | 67  | 1 | 0 | 0 | 0 | 0 |
| 66 | 72  | 1 | 0 | 0 | 0 | 0 |
| 66 | 74  | 1 | 0 | 0 | 0 | 0 |
| 67 | 68  | 1 | 0 | 0 | 0 | 0 |
| 67 | 69  | 2 | 0 | 0 | 0 | 0 |
| 69 | 70  | 1 | 0 | 0 | 0 | 0 |
| 69 | 71  | 1 | 0 | 0 | 0 | 0 |
| 71 | 72  | 2 | 0 | 0 | 0 | 0 |
| 72 | 73  | 1 | 0 | 0 | 0 | 0 |
| 74 | 75  | 1 | 0 | 0 | 0 | 0 |
| 74 | 76  | 1 | 0 | 0 | 0 | 0 |
| 74 | 77  | 1 | 0 | 0 | 0 | 0 |
| 77 | 78  | 1 | 0 | 0 | 0 | 0 |
| 77 | 79  | 1 | 0 | 0 | 0 | 0 |
| 77 | 80  | 1 | 0 | 0 | 0 | 0 |
| 80 | 92  | 1 | 0 | 0 | 0 | 0 |
| 81 | 82  | 1 | 0 | 0 | 0 | 0 |
| 81 | 90  | 2 | 0 | 0 | 0 | 0 |
| 81 | 128 | 1 | 0 | 0 | 0 | 0 |
| 82 | 83  | 1 | 0 | 0 | 0 | 0 |

|     |     |   |   |   |   |   |
|-----|-----|---|---|---|---|---|
| 82  | 84  | 2 | 0 | 0 | 0 | 0 |
| 84  | 85  | 1 | 0 | 0 | 0 | 0 |
| 84  | 86  | 1 | 0 | 0 | 0 | 0 |
| 86  | 87  | 1 | 0 | 0 | 0 | 0 |
| 86  | 88  | 2 | 0 | 0 | 0 | 0 |
| 88  | 89  | 1 | 0 | 0 | 0 | 0 |
| 88  | 90  | 1 | 0 | 0 | 0 | 0 |
| 90  | 91  | 1 | 0 | 0 | 0 | 0 |
| 92  | 93  | 1 | 0 | 0 | 0 | 0 |
| 92  | 94  | 1 | 0 | 0 | 0 | 0 |
| 92  | 95  | 1 | 0 | 0 | 0 | 0 |
| 95  | 96  | 1 | 0 | 0 | 0 | 0 |
| 95  | 97  | 1 | 0 | 0 | 0 | 0 |
| 95  | 98  | 1 | 0 | 0 | 0 | 0 |
| 98  | 99  | 1 | 0 | 0 | 0 | 0 |
| 98  | 115 | 2 | 0 | 0 | 0 | 0 |
| 99  | 100 | 1 | 0 | 0 | 0 | 0 |
| 100 | 101 | 1 | 0 | 0 | 0 | 0 |
| 100 | 102 | 1 | 0 | 0 | 0 | 0 |
| 100 | 103 | 1 | 0 | 0 | 0 | 0 |
| 103 | 104 | 1 | 0 | 0 | 0 | 0 |
| 103 | 117 | 1 | 0 | 0 | 0 | 0 |
| 103 | 120 | 1 | 0 | 0 | 0 | 0 |
| 104 | 105 | 1 | 0 | 0 | 0 | 0 |
| 104 | 106 | 1 | 0 | 0 | 0 | 0 |
| 104 | 107 | 1 | 0 | 0 | 0 | 0 |
| 107 | 108 | 1 | 0 | 0 | 0 | 0 |
| 108 | 109 | 1 | 0 | 0 | 0 | 0 |
| 108 | 116 | 2 | 0 | 0 | 0 | 0 |
| 109 | 110 | 1 | 0 | 0 | 0 | 0 |
| 109 | 111 | 1 | 0 | 0 | 0 | 0 |
| 109 | 112 | 1 | 0 | 0 | 0 | 0 |
| 112 | 113 | 1 | 0 | 0 | 0 | 0 |
| 112 | 114 | 1 | 0 | 0 | 0 | 0 |
| 112 | 144 | 1 | 0 | 0 | 0 | 0 |
| 117 | 118 | 1 | 0 | 0 | 0 | 0 |
| 117 | 119 | 1 | 0 | 0 | 0 | 0 |
| 117 | 123 | 1 | 0 | 0 | 0 | 0 |
| 120 | 121 | 1 | 0 | 0 | 0 | 0 |
| 120 | 122 | 1 | 0 | 0 | 0 | 0 |
| 120 | 127 | 1 | 0 | 0 | 0 | 0 |
| 123 | 124 | 1 | 0 | 0 | 0 | 0 |
| 123 | 125 | 1 | 0 | 0 | 0 | 0 |
| 123 | 126 | 1 | 0 | 0 | 0 | 0 |
| 127 | 128 | 1 | 0 | 0 | 0 | 0 |
| 128 | 129 | 2 | 0 | 0 | 0 | 0 |
| 130 | 131 | 1 | 0 | 0 | 0 | 0 |
| 130 | 136 | 1 | 0 | 0 | 0 | 0 |
| 130 | 138 | 1 | 0 | 0 | 0 | 0 |
| 131 | 132 | 1 | 0 | 0 | 0 | 0 |
| 131 | 133 | 2 | 0 | 0 | 0 | 0 |
| 133 | 134 | 1 | 0 | 0 | 0 | 0 |
| 133 | 135 | 1 | 0 | 0 | 0 | 0 |
| 135 | 136 | 2 | 0 | 0 | 0 | 0 |
| 136 | 137 | 1 | 0 | 0 | 0 | 0 |
| 138 | 139 | 1 | 0 | 0 | 0 | 0 |
| 138 | 140 | 1 | 0 | 0 | 0 | 0 |
| 138 | 141 | 1 | 0 | 0 | 0 | 0 |
| 141 | 142 | 1 | 0 | 0 | 0 | 0 |
| 141 | 143 | 1 | 0 | 0 | 0 | 0 |
| 141 | 144 | 1 | 0 | 0 | 0 | 0 |
| 144 | 156 | 1 | 0 | 0 | 0 | 0 |
| 145 | 146 | 1 | 0 | 0 | 0 | 0 |
| 145 | 154 | 2 | 0 | 0 | 0 | 0 |
| 145 | 192 | 1 | 0 | 0 | 0 | 0 |
| 146 | 147 | 1 | 0 | 0 | 0 | 0 |
| 146 | 148 | 2 | 0 | 0 | 0 | 0 |
| 148 | 149 | 1 | 0 | 0 | 0 | 0 |
| 148 | 150 | 1 | 0 | 0 | 0 | 0 |
| 150 | 151 | 1 | 0 | 0 | 0 | 0 |
| 150 | 152 | 2 | 0 | 0 | 0 | 0 |
| 152 | 153 | 1 | 0 | 0 | 0 | 0 |
| 152 | 154 | 1 | 0 | 0 | 0 | 0 |
| 154 | 155 | 1 | 0 | 0 | 0 | 0 |
| 156 | 157 | 1 | 0 | 0 | 0 | 0 |
| 156 | 158 | 1 | 0 | 0 | 0 | 0 |
| 156 | 159 | 1 | 0 | 0 | 0 | 0 |
| 159 | 160 | 1 | 0 | 0 | 0 | 0 |
| 159 | 161 | 1 | 0 | 0 | 0 | 0 |
| 159 | 162 | 1 | 0 | 0 | 0 | 0 |
| 162 | 163 | 1 | 0 | 0 | 0 | 0 |

|        |   |   |   |   |   |
|--------|---|---|---|---|---|
| 162179 | 2 | 0 | 0 | 0 | 0 |
| 163164 | 1 | 0 | 0 | 0 | 0 |
| 164165 | 1 | 0 | 0 | 0 | 0 |
| 164166 | 1 | 0 | 0 | 0 | 0 |
| 164167 | 1 | 0 | 0 | 0 | 0 |
| 167168 | 1 | 0 | 0 | 0 | 0 |
| 167181 | 1 | 0 | 0 | 0 | 0 |
| 167184 | 1 | 0 | 0 | 0 | 0 |
| 168169 | 1 | 0 | 0 | 0 | 0 |
| 168170 | 1 | 0 | 0 | 0 | 0 |
| 168171 | 1 | 0 | 0 | 0 | 0 |
| 171172 | 1 | 0 | 0 | 0 | 0 |
| 172173 | 1 | 0 | 0 | 0 | 0 |
| 172180 | 2 | 0 | 0 | 0 | 0 |
| 173174 | 1 | 0 | 0 | 0 | 0 |
| 173175 | 1 | 0 | 0 | 0 | 0 |
| 173176 | 1 | 0 | 0 | 0 | 0 |
| 176177 | 1 | 0 | 0 | 0 | 0 |
| 176178 | 1 | 0 | 0 | 0 | 0 |
| 176208 | 1 | 0 | 0 | 0 | 0 |
| 181182 | 1 | 0 | 0 | 0 | 0 |
| 181183 | 1 | 0 | 0 | 0 | 0 |
| 181187 | 1 | 0 | 0 | 0 | 0 |
| 184185 | 1 | 0 | 0 | 0 | 0 |
| 184186 | 1 | 0 | 0 | 0 | 0 |
| 184191 | 1 | 0 | 0 | 0 | 0 |
| 187188 | 1 | 0 | 0 | 0 | 0 |
| 187189 | 1 | 0 | 0 | 0 | 0 |
| 187190 | 1 | 0 | 0 | 0 | 0 |
| 191192 | 1 | 0 | 0 | 0 | 0 |
| 192193 | 2 | 0 | 0 | 0 | 0 |
| 194195 | 1 | 0 | 0 | 0 | 0 |
| 194200 | 1 | 0 | 0 | 0 | 0 |
| 194202 | 1 | 0 | 0 | 0 | 0 |
| 195196 | 1 | 0 | 0 | 0 | 0 |
| 195197 | 2 | 0 | 0 | 0 | 0 |
| 197198 | 1 | 0 | 0 | 0 | 0 |
| 197199 | 1 | 0 | 0 | 0 | 0 |
| 199200 | 2 | 0 | 0 | 0 | 0 |
| 200201 | 1 | 0 | 0 | 0 | 0 |
| 202203 | 1 | 0 | 0 | 0 | 0 |
| 202204 | 1 | 0 | 0 | 0 | 0 |
| 202205 | 1 | 0 | 0 | 0 | 0 |
| 205206 | 1 | 0 | 0 | 0 | 0 |
| 205207 | 1 | 0 | 0 | 0 | 0 |
| 205208 | 1 | 0 | 0 | 0 | 0 |
| 208220 | 1 | 0 | 0 | 0 | 0 |
| 209210 | 1 | 0 | 0 | 0 | 0 |
| 209218 | 2 | 0 | 0 | 0 | 0 |
| 209256 | 1 | 0 | 0 | 0 | 0 |
| 210211 | 1 | 0 | 0 | 0 | 0 |
| 210212 | 2 | 0 | 0 | 0 | 0 |
| 212213 | 1 | 0 | 0 | 0 | 0 |
| 212214 | 1 | 0 | 0 | 0 | 0 |
| 214215 | 1 | 0 | 0 | 0 | 0 |
| 214216 | 2 | 0 | 0 | 0 | 0 |
| 216217 | 1 | 0 | 0 | 0 | 0 |
| 216218 | 1 | 0 | 0 | 0 | 0 |
| 218219 | 1 | 0 | 0 | 0 | 0 |
| 220221 | 1 | 0 | 0 | 0 | 0 |
| 220222 | 1 | 0 | 0 | 0 | 0 |
| 220223 | 1 | 0 | 0 | 0 | 0 |
| 223224 | 1 | 0 | 0 | 0 | 0 |
| 223225 | 1 | 0 | 0 | 0 | 0 |
| 223226 | 1 | 0 | 0 | 0 | 0 |
| 226227 | 1 | 0 | 0 | 0 | 0 |
| 226243 | 2 | 0 | 0 | 0 | 0 |
| 227228 | 1 | 0 | 0 | 0 | 0 |
| 228229 | 1 | 0 | 0 | 0 | 0 |
| 228230 | 1 | 0 | 0 | 0 | 0 |
| 228231 | 1 | 0 | 0 | 0 | 0 |
| 231232 | 1 | 0 | 0 | 0 | 0 |
| 231245 | 1 | 0 | 0 | 0 | 0 |
| 231248 | 1 | 0 | 0 | 0 | 0 |
| 232233 | 1 | 0 | 0 | 0 | 0 |
| 232234 | 1 | 0 | 0 | 0 | 0 |
| 232235 | 1 | 0 | 0 | 0 | 0 |
| 235236 | 1 | 0 | 0 | 0 | 0 |
| 236237 | 1 | 0 | 0 | 0 | 0 |
| 236244 | 2 | 0 | 0 | 0 | 0 |
| 237238 | 1 | 0 | 0 | 0 | 0 |

|        |   |   |   |   |   |
|--------|---|---|---|---|---|
| 237239 | 1 | 0 | 0 | 0 | 0 |
| 237240 | 1 | 0 | 0 | 0 | 0 |
| 240241 | 1 | 0 | 0 | 0 | 0 |
| 240242 | 1 | 0 | 0 | 0 | 0 |
| 240272 | 1 | 0 | 0 | 0 | 0 |
| 245246 | 1 | 0 | 0 | 0 | 0 |
| 245247 | 1 | 0 | 0 | 0 | 0 |
| 245251 | 1 | 0 | 0 | 0 | 0 |
| 248249 | 1 | 0 | 0 | 0 | 0 |
| 248250 | 1 | 0 | 0 | 0 | 0 |
| 248255 | 1 | 0 | 0 | 0 | 0 |
| 251252 | 1 | 0 | 0 | 0 | 0 |
| 251253 | 1 | 0 | 0 | 0 | 0 |
| 251254 | 1 | 0 | 0 | 0 | 0 |
| 255256 | 1 | 0 | 0 | 0 | 0 |
| 256257 | 2 | 0 | 0 | 0 | 0 |
| 258259 | 1 | 0 | 0 | 0 | 0 |
| 258264 | 1 | 0 | 0 | 0 | 0 |
| 258266 | 1 | 0 | 0 | 0 | 0 |
| 259260 | 1 | 0 | 0 | 0 | 0 |
| 259261 | 2 | 0 | 0 | 0 | 0 |
| 261262 | 1 | 0 | 0 | 0 | 0 |
| 261263 | 1 | 0 | 0 | 0 | 0 |
| 263264 | 2 | 0 | 0 | 0 | 0 |
| 264265 | 1 | 0 | 0 | 0 | 0 |
| 266267 | 1 | 0 | 0 | 0 | 0 |
| 266268 | 1 | 0 | 0 | 0 | 0 |
| 266269 | 1 | 0 | 0 | 0 | 0 |
| 269270 | 1 | 0 | 0 | 0 | 0 |
| 269271 | 1 | 0 | 0 | 0 | 0 |
| 269272 | 1 | 0 | 0 | 0 | 0 |
| 272284 | 1 | 0 | 0 | 0 | 0 |
| 273274 | 1 | 0 | 0 | 0 | 0 |
| 273282 | 2 | 0 | 0 | 0 | 0 |
| 273320 | 1 | 0 | 0 | 0 | 0 |
| 274275 | 1 | 0 | 0 | 0 | 0 |
| 274276 | 2 | 0 | 0 | 0 | 0 |
| 276277 | 1 | 0 | 0 | 0 | 0 |
| 276278 | 1 | 0 | 0 | 0 | 0 |
| 278279 | 1 | 0 | 0 | 0 | 0 |
| 278280 | 2 | 0 | 0 | 0 | 0 |
| 280281 | 1 | 0 | 0 | 0 | 0 |
| 280282 | 1 | 0 | 0 | 0 | 0 |
| 282283 | 1 | 0 | 0 | 0 | 0 |
| 284285 | 1 | 0 | 0 | 0 | 0 |
| 284286 | 1 | 0 | 0 | 0 | 0 |
| 284287 | 1 | 0 | 0 | 0 | 0 |
| 287288 | 1 | 0 | 0 | 0 | 0 |
| 287289 | 1 | 0 | 0 | 0 | 0 |
| 287290 | 1 | 0 | 0 | 0 | 0 |
| 290291 | 1 | 0 | 0 | 0 | 0 |
| 290307 | 2 | 0 | 0 | 0 | 0 |
| 291292 | 1 | 0 | 0 | 0 | 0 |
| 292293 | 1 | 0 | 0 | 0 | 0 |
| 292294 | 1 | 0 | 0 | 0 | 0 |
| 292295 | 1 | 0 | 0 | 0 | 0 |
| 295296 | 1 | 0 | 0 | 0 | 0 |
| 295309 | 1 | 0 | 0 | 0 | 0 |
| 295312 | 1 | 0 | 0 | 0 | 0 |
| 296297 | 1 | 0 | 0 | 0 | 0 |
| 296298 | 1 | 0 | 0 | 0 | 0 |
| 296299 | 1 | 0 | 0 | 0 | 0 |
| 299300 | 1 | 0 | 0 | 0 | 0 |
| 300301 | 1 | 0 | 0 | 0 | 0 |
| 300308 | 2 | 0 | 0 | 0 | 0 |
| 301302 | 1 | 0 | 0 | 0 | 0 |
| 301303 | 1 | 0 | 0 | 0 | 0 |
| 301304 | 1 | 0 | 0 | 0 | 0 |
| 304305 | 1 | 0 | 0 | 0 | 0 |
| 304306 | 1 | 0 | 0 | 0 | 0 |
| 304336 | 1 | 0 | 0 | 0 | 0 |
| 309310 | 1 | 0 | 0 | 0 | 0 |
| 309311 | 1 | 0 | 0 | 0 | 0 |
| 309315 | 1 | 0 | 0 | 0 | 0 |
| 312313 | 1 | 0 | 0 | 0 | 0 |
| 312314 | 1 | 0 | 0 | 0 | 0 |
| 312319 | 1 | 0 | 0 | 0 | 0 |
| 315316 | 1 | 0 | 0 | 0 | 0 |
| 315317 | 1 | 0 | 0 | 0 | 0 |
| 315318 | 1 | 0 | 0 | 0 | 0 |
| 319320 | 1 | 0 | 0 | 0 | 0 |

320321 2 0 0 0 0  
322323 1 0 0 0 0  
322328 1 0 0 0 0  
322330 1 0 0 0 0  
323324 1 0 0 0 0  
323325 2 0 0 0 0  
325326 1 0 0 0 0  
325327 1 0 0 0 0  
327328 2 0 0 0 0  
328329 1 0 0 0 0  
330331 1 0 0 0 0  
330332 1 0 0 0 0  
330333 1 0 0 0 0  
333334 1 0 0 0 0  
333335 1 0 0 0 0  
333336 1 0 0 0 0  
336337 1 0 0 0 0

M END  
> <NAME>  
AA94\_12

\$\$\$  
B17\_12  
MOE2012 3D

308313 0 0 1 0 0 0 0 0999 V2000  
25.3990 -8.7140 -1.5930 C 0 0 0 0 0 0 0 0 0 0 0 0 0 0 0 0  
26.3340 -7.8960 -2.2440 C 0 0 0 0 0 0 0 0 0 0 0 0 0 0 0 0  
26.0410 -7.4440 -3.5360 C 0 0 0 0 0 0 0 0 0 0 0 0 0 0 0 0  
26.7320 -6.8050 -4.0770 H 0 0 0 0 0 0 0 0 0 0 0 0 0 0 0 0  
24.8460 -7.8160 -4.1790 C 0 0 0 0 0 0 0 0 0 0 0 0 0 0 0 0  
23.9350 -8.6440 -3.5130 C 0 0 0 0 0 0 0 0 0 0 0 0 0 0 0 0  
23.0060 -8.9430 -3.9930 H 0 0 0 0 0 0 0 0 0 0 0 0 0 0 0 0  
24.2160 -9.1010 -2.2270 C 0 0 0 0 0 0 0 0 0 0 0 0 0 0 0 0  
23.5170 -9.7590 -1.7190 H 0 0 0 0 0 0 0 0 0 0 0 0 0 0 0 0  
25.6320 -9.2380 -0.3450 O 0 0 0 0 0 0 0 0 0 0 0 0 0 0 0 0  
27.4790 -7.6020 -1.5500 O 0 0 0 0 0 0 0 0 0 0 0 0 0 0 0 0  
28.4720 -6.8380 -2.2240 C 0 0 0 0 0 0 0 0 0 0 0 0 0 0 0 0  
29.3220 -6.7240 -1.5440 H 0 0 0 0 0 0 0 0 0 0 0 0 0 0 0 0  
28.1030 -5.8360 -2.4640 H 0 0 0 0 0 0 0 0 0 0 0 0 0 0 0 0  
28.8300 -7.3560 -3.1200 H 0 0 0 0 0 0 0 0 0 0 0 0 0 0 0 0  
25.3680 -8.2630 0.6640 C 0 0 0 0 0 0 0 0 0 0 0 0 0 0 0 0  
24.4070 -7.7600 0.5050 H 0 0 0 0 0 0 0 0 0 0 0 0 0 0 0 0  
26.1810 -7.5340 0.7210 H 0 0 0 0 0 0 0 0 0 0 0 0 0 0 0 0  
25.3190 -8.7840 1.6250 H 0 0 0 0 0 0 0 0 0 0 0 0 0 0 0 0  
24.5330 -7.3010 -5.5650 C 0 0 0 0 0 0 0 0 0 0 0 0 0 0 0 0  
25.4690 -7.1880 -6.1290 H 0 0 0 0 0 0 0 0 0 0 0 0 0 0 0 0  
23.9410 -8.0490 -6.1090 H 0 0 0 0 0 0 0 0 0 0 0 0 0 0 0 0  
23.7810 -5.9680 -5.5010 C 0 0 0 0 0 0 0 0 0 0 0 0 0 0 0 0  
22.8380 -6.1100 -4.9600 H 0 0 0 0 0 0 0 0 0 0 0 0 0 0 0 0  
24.3850 -5.2460 -4.9420 H 0 0 0 0 0 0 0 0 0 0 0 0 0 0 0 0  
23.5190 -5.4630 -6.8490 N 0 0 0 3 0 0 0 0 0 0 0 0 0 0 0 0  
24.3970 -5.2250 -7.3110 H 0 0 0 0 0 0 0 0 0 0 0 0 0 0 0 0  
22.6090 -4.3130 -6.8710 C 0 0 0 0 0 0 0 0 0 0 0 0 0 0 0 0  
21.6440 -4.5950 -6.4330 H 0 0 0 0 0 0 0 0 0 0 0 0 0 0 0 0  
22.4060 -4.1080 -7.9290 H 0 0 0 0 0 0 0 0 0 0 0 0 0 0 0 0  
23.1700 -3.0370 -6.2470 C 0 0 0 0 0 0 0 0 0 0 0 0 0 0 0 0  
24.2640 -3.0420 -6.1810 H 0 0 0 0 0 0 0 0 0 0 0 0 0 0 0 0  
22.9160 -2.1700 -6.8700 H 0 0 0 0 0 0 0 0 0 0 0 0 0 0 0 0  
22.5580 -2.7890 -4.8930 C 0 0 0 0 0 0 0 0 0 0 0 0 0 0 0 0  
23.4270 -3.1420 -3.9090 O 0 0 0 0 0 0 0 0 0 0 0 0 0 0 0 0  
22.9600 -3.0350 -2.5510 C 0 0 0 3 0 0 0 0 0 0 0 0 0 0 0 0  
22.3920 -2.1040 -2.4260 H 0 0 0 0 0 0 0 0 0 0 0 0 0 0 0 0  
24.1880 -2.9580 -1.6370 C 0 0 0 0 0 0 0 0 0 0 0 0 0 0 0 0  
24.7370 -2.0320 -1.8510 H 0 0 0 0 0 0 0 0 0 0 0 0 0 0 0 0  
23.8690 -2.8800 -0.5930 H 0 0 0 0 0 0 0 0 0 0 0 0 0 0 0 0  
25.1640 -4.1220 -1.8000 C 0 0 0 0 0 0 0 0 0 0 0 0 0 0 0 0  
24.6800 -5.0970 -1.6800 H 0 0 0 0 0 0 0 0 0 0 0 0 0 0 0 0  
25.6130 -4.1080 -2.7990 H 0 0 0 0 0 0 0 0 0 0 0 0 0 0 0 0  
26.2470 -3.9910 -0.8620 O 0 0 0 0 0 0 0 0 0 0 0 0 0 0 0 0  
26.0010 -4.4800 0.3900 C 0 0 0 0 0 0 0 0 0 0 0 0 0 0 0 0  
27.2480 -4.3600 1.2290 C 0 0 0 0 0 0 0 0 0 0 0 0 0 0 0 0  
27.8910 -5.2100 0.9730 H 0 0 0 0 0 0 0 0 0 0 0 0 0 0 0 0  
27.7820 -3.4440 0.9570 H 0 0 0 0 0 0 0 0 0 0 0 0 0 0 0 0  
26.9360 -4.3970 2.7270 C 0 0 0 0 0 0 0 0 0 0 0 0 0 0 0 0  
27.8580 -4.5830 3.2930 H 0 0 0 0 0 0 0 0 0 0 0 0 0 0 0 0  
26.2880 -5.2620 2.9160 H 0 0 0 0 0 0 0 0 0 0 0 0 0 0 0 0  
21.4250 -2.3580 -4.7290 O 0 0 0 0 0 0 0 0 0 0 0 0 0 0 0 0  
24.9510 -4.9930 0.7510 O 0 0 0 0 0 0 0 0 0 0 0 0 0 0 0 0  
22.0660 -4.2270 -2.2130 C 0 0 0 0 0 0 0 0 0 0 0 0 0 0 0 0  
21.1370 -4.1890 -2.7920 H 0 0 0 0 0 0 0 0 0 0 0 0 0 0 0 0









|         |          |         |   |   |   |   |   |   |   |   |   |   |   |   |   |
|---------|----------|---------|---|---|---|---|---|---|---|---|---|---|---|---|---|
| 31.4860 | -9.7820  | 28.4920 | H | 0 | 0 | 0 | 0 | 0 | 0 | 0 | 0 | 0 | 0 | 0 | 0 |
| 29.9940 | -10.5980 | 28.9780 | H | 0 | 0 | 0 | 0 | 0 | 0 | 0 | 0 | 0 | 0 | 0 | 0 |
| 33.1670 | -7.2010  | 23.2700 | C | 0 | 0 | 0 | 0 | 0 | 0 | 0 | 0 | 0 | 0 | 0 | 0 |
| 34.0050 | -6.6850  | 23.7570 | H | 0 | 0 | 0 | 0 | 0 | 0 | 0 | 0 | 0 | 0 | 0 | 0 |
| 33.6160 | -7.9920  | 22.6550 | H | 0 | 0 | 0 | 0 | 0 | 0 | 0 | 0 | 0 | 0 | 0 | 0 |
| 32.3760 | -6.2270  | 22.3870 | C | 0 | 0 | 0 | 0 | 0 | 0 | 0 | 0 | 0 | 0 | 0 | 0 |
| 31.5500 | -6.7680  | 21.9110 | H | 0 | 0 | 0 | 0 | 0 | 0 | 0 | 0 | 0 | 0 | 0 | 0 |
| 31.9420 | -5.4350  | 23.0100 | H | 0 | 0 | 0 | 0 | 0 | 0 | 0 | 0 | 0 | 0 | 0 | 0 |
| 33.2560 | -5.6420  | 21.3710 | N | 0 | 0 | 3 | 0 | 0 | 0 | 0 | 0 | 0 | 0 | 0 | 0 |
| 34.0540 | -5.2060  | 21.8350 | H | 0 | 0 | 0 | 0 | 0 | 0 | 0 | 0 | 0 | 0 | 0 | 0 |
| 1       | 2        | 1       | 0 | 0 | 0 | 0 | 0 | 0 | 0 | 0 | 0 | 0 | 0 | 0 | 0 |
| 1       | 8        | 2       | 0 | 0 | 0 | 0 | 0 | 0 | 0 | 0 | 0 | 0 | 0 | 0 | 0 |
| 1       | 10       | 1       | 0 | 0 | 0 | 0 | 0 | 0 | 0 | 0 | 0 | 0 | 0 | 0 | 0 |
| 2       | 3        | 2       | 0 | 0 | 0 | 0 | 0 | 0 | 0 | 0 | 0 | 0 | 0 | 0 | 0 |
| 2       | 11       | 1       | 0 | 0 | 0 | 0 | 0 | 0 | 0 | 0 | 0 | 0 | 0 | 0 | 0 |
| 3       | 4        | 1       | 0 | 0 | 0 | 0 | 0 | 0 | 0 | 0 | 0 | 0 | 0 | 0 | 0 |
| 3       | 5        | 1       | 0 | 0 | 0 | 0 | 0 | 0 | 0 | 0 | 0 | 0 | 0 | 0 | 0 |
| 5       | 6        | 2       | 0 | 0 | 0 | 0 | 0 | 0 | 0 | 0 | 0 | 0 | 0 | 0 | 0 |
| 5       | 20       | 1       | 0 | 0 | 0 | 0 | 0 | 0 | 0 | 0 | 0 | 0 | 0 | 0 | 0 |
| 6       | 7        | 1       | 0 | 0 | 0 | 0 | 0 | 0 | 0 | 0 | 0 | 0 | 0 | 0 | 0 |
| 6       | 8        | 1       | 0 | 0 | 0 | 0 | 0 | 0 | 0 | 0 | 0 | 0 | 0 | 0 | 0 |
| 8       | 9        | 1       | 0 | 0 | 0 | 0 | 0 | 0 | 0 | 0 | 0 | 0 | 0 | 0 | 0 |
| 10      | 16       | 1       | 0 | 0 | 0 | 0 | 0 | 0 | 0 | 0 | 0 | 0 | 0 | 0 | 0 |
| 11      | 12       | 1       | 0 | 0 | 0 | 0 | 0 | 0 | 0 | 0 | 0 | 0 | 0 | 0 | 0 |
| 12      | 13       | 1       | 0 | 0 | 0 | 0 | 0 | 0 | 0 | 0 | 0 | 0 | 0 | 0 | 0 |
| 12      | 14       | 1       | 0 | 0 | 0 | 0 | 0 | 0 | 0 | 0 | 0 | 0 | 0 | 0 | 0 |
| 12      | 15       | 1       | 0 | 0 | 0 | 0 | 0 | 0 | 0 | 0 | 0 | 0 | 0 | 0 | 0 |
| 16      | 17       | 1       | 0 | 0 | 0 | 0 | 0 | 0 | 0 | 0 | 0 | 0 | 0 | 0 | 0 |
| 16      | 18       | 1       | 0 | 0 | 0 | 0 | 0 | 0 | 0 | 0 | 0 | 0 | 0 | 0 | 0 |
| 16      | 19       | 1       | 0 | 0 | 0 | 0 | 0 | 0 | 0 | 0 | 0 | 0 | 0 | 0 | 0 |
| 20      | 21       | 1       | 0 | 0 | 0 | 0 | 0 | 0 | 0 | 0 | 0 | 0 | 0 | 0 | 0 |
| 20      | 22       | 1       | 0 | 0 | 0 | 0 | 0 | 0 | 0 | 0 | 0 | 0 | 0 | 0 | 0 |
| 20      | 23       | 1       | 0 | 0 | 0 | 0 | 0 | 0 | 0 | 0 | 0 | 0 | 0 | 0 | 0 |
| 23      | 24       | 1       | 0 | 0 | 0 | 0 | 0 | 0 | 0 | 0 | 0 | 0 | 0 | 0 | 0 |
| 23      | 25       | 1       | 0 | 0 | 0 | 0 | 0 | 0 | 0 | 0 | 0 | 0 | 0 | 0 | 0 |
| 23      | 26       | 1       | 0 | 0 | 0 | 0 | 0 | 0 | 0 | 0 | 0 | 0 | 0 | 0 | 0 |
| 26      | 27       | 1       | 0 | 0 | 0 | 0 | 0 | 0 | 0 | 0 | 0 | 0 | 0 | 0 | 0 |
| 26      | 28       | 1       | 0 | 0 | 0 | 0 | 0 | 0 | 0 | 0 | 0 | 0 | 0 | 0 | 0 |
| 28      | 29       | 1       | 0 | 0 | 0 | 0 | 0 | 0 | 0 | 0 | 0 | 0 | 0 | 0 | 0 |
| 28      | 30       | 1       | 0 | 0 | 0 | 0 | 0 | 0 | 0 | 0 | 0 | 0 | 0 | 0 | 0 |
| 28      | 31       | 1       | 0 | 0 | 0 | 0 | 0 | 0 | 0 | 0 | 0 | 0 | 0 | 0 | 0 |
| 31      | 32       | 1       | 0 | 0 | 0 | 0 | 0 | 0 | 0 | 0 | 0 | 0 | 0 | 0 | 0 |
| 31      | 33       | 1       | 0 | 0 | 0 | 0 | 0 | 0 | 0 | 0 | 0 | 0 | 0 | 0 | 0 |
| 31      | 34       | 1       | 0 | 0 | 0 | 0 | 0 | 0 | 0 | 0 | 0 | 0 | 0 | 0 | 0 |
| 34      | 35       | 1       | 0 | 0 | 0 | 0 | 0 | 0 | 0 | 0 | 0 | 0 | 0 | 0 | 0 |
| 34      | 52       | 2       | 0 | 0 | 0 | 0 | 0 | 0 | 0 | 0 | 0 | 0 | 0 | 0 | 0 |
| 35      | 36       | 1       | 0 | 0 | 0 | 0 | 0 | 0 | 0 | 0 | 0 | 0 | 0 | 0 | 0 |
| 36      | 37       | 1       | 0 | 0 | 0 | 0 | 0 | 0 | 0 | 0 | 0 | 0 | 0 | 0 | 0 |
| 36      | 38       | 1       | 0 | 0 | 0 | 0 | 0 | 0 | 0 | 0 | 0 | 0 | 0 | 0 | 0 |
| 36      | 54       | 1       | 0 | 0 | 0 | 0 | 0 | 0 | 0 | 0 | 0 | 0 | 0 | 0 | 0 |
| 38      | 39       | 1       | 0 | 0 | 0 | 0 | 0 | 0 | 0 | 0 | 0 | 0 | 0 | 0 | 0 |
| 38      | 40       | 1       | 0 | 0 | 0 | 0 | 0 | 0 | 0 | 0 | 0 | 0 | 0 | 0 | 0 |
| 38      | 41       | 1       | 0 | 0 | 0 | 0 | 0 | 0 | 0 | 0 | 0 | 0 | 0 | 0 | 0 |
| 41      | 42       | 1       | 0 | 0 | 0 | 0 | 0 | 0 | 0 | 0 | 0 | 0 | 0 | 0 | 0 |
| 41      | 43       | 1       | 0 | 0 | 0 | 0 | 0 | 0 | 0 | 0 | 0 | 0 | 0 | 0 | 0 |
| 41      | 44       | 1       | 0 | 0 | 0 | 0 | 0 | 0 | 0 | 0 | 0 | 0 | 0 | 0 | 0 |
| 44      | 45       | 1       | 0 | 0 | 0 | 0 | 0 | 0 | 0 | 0 | 0 | 0 | 0 | 0 | 0 |
| 45      | 46       | 1       | 0 | 0 | 0 | 0 | 0 | 0 | 0 | 0 | 0 | 0 | 0 | 0 | 0 |
| 45      | 53       | 2       | 0 | 0 | 0 | 0 | 0 | 0 | 0 | 0 | 0 | 0 | 0 | 0 | 0 |
| 46      | 47       | 1       | 0 | 0 | 0 | 0 | 0 | 0 | 0 | 0 | 0 | 0 | 0 | 0 | 0 |
| 46      | 48       | 1       | 0 | 0 | 0 | 0 | 0 | 0 | 0 | 0 | 0 | 0 | 0 | 0 | 0 |
| 46      | 49       | 1       | 0 | 0 | 0 | 0 | 0 | 0 | 0 | 0 | 0 | 0 | 0 | 0 | 0 |
| 49      | 50       | 1       | 0 | 0 | 0 | 0 | 0 | 0 | 0 | 0 | 0 | 0 | 0 | 0 | 0 |
| 49      | 51       | 1       | 0 | 0 | 0 | 0 | 0 | 0 | 0 | 0 | 0 | 0 | 0 | 0 | 0 |
| 49      | 83       | 1       | 0 | 0 | 0 | 0 | 0 | 0 | 0 | 0 | 0 | 0 | 0 | 0 | 0 |
| 54      | 55       | 1       | 0 | 0 | 0 | 0 | 0 | 0 | 0 | 0 | 0 | 0 | 0 | 0 | 0 |
| 54      | 56       | 1       | 0 | 0 | 0 | 0 | 0 | 0 | 0 | 0 | 0 | 0 | 0 | 0 | 0 |
| 54      | 57       | 1       | 0 | 0 | 0 | 0 | 0 | 0 | 0 | 0 | 0 | 0 | 0 | 0 | 0 |
| 58      | 59       | 1       | 0 | 0 | 0 | 0 | 0 | 0 | 0 | 0 | 0 | 0 | 0 | 0 | 0 |
| 58      | 65       | 2       | 0 | 0 | 0 | 0 | 0 | 0 | 0 | 0 | 0 | 0 | 0 | 0 | 0 |
| 58      | 67       | 1       | 0 | 0 | 0 | 0 | 0 | 0 | 0 | 0 | 0 | 0 | 0 | 0 | 0 |
| 59      | 60       | 2       | 0 | 0 | 0 | 0 | 0 | 0 | 0 | 0 | 0 | 0 | 0 | 0 | 0 |
| 59      | 68       | 1       | 0 | 0 | 0 | 0 | 0 | 0 | 0 | 0 | 0 | 0 | 0 | 0 | 0 |
| 60      | 61       | 1       | 0 | 0 | 0 | 0 | 0 | 0 | 0 | 0 | 0 | 0 | 0 | 0 | 0 |
| 60      | 62       | 1       | 0 | 0 | 0 | 0 | 0 | 0 | 0 | 0 | 0 | 0 | 0 | 0 | 0 |
| 62      | 63       | 2       | 0 | 0 | 0 | 0 | 0 | 0 | 0 | 0 | 0 | 0 | 0 | 0 | 0 |
| 62      | 77       | 1       | 0 | 0 | 0 | 0 | 0 | 0 | 0 | 0 | 0 | 0 | 0 | 0 | 0 |
| 63      | 64       | 1       | 0 | 0 | 0 | 0 | 0 | 0 | 0 | 0 | 0 | 0 | 0 | 0 | 0 |
| 63      | 65       | 1       | 0 | 0 | 0 | 0 | 0 | 0 | 0 | 0 | 0 | 0 | 0 | 0 | 0 |
| 65      | 66       | 1       | 0 | 0 | 0 | 0 | 0 | 0 | 0 | 0 | 0 | 0 | 0 | 0 | 0 |
| 67      | 73       | 1       | 0 | 0 | 0 | 0 | 0 | 0 | 0 | 0 | 0 | 0 | 0 | 0 | 0 |

|     |     |   |   |   |   |   |
|-----|-----|---|---|---|---|---|
| 68  | 69  | 1 | 0 | 0 | 0 | 0 |
| 69  | 70  | 1 | 0 | 0 | 0 | 0 |
| 69  | 71  | 1 | 0 | 0 | 0 | 0 |
| 69  | 72  | 1 | 0 | 0 | 0 | 0 |
| 73  | 74  | 1 | 0 | 0 | 0 | 0 |
| 73  | 75  | 1 | 0 | 0 | 0 | 0 |
| 73  | 76  | 1 | 0 | 0 | 0 | 0 |
| 77  | 78  | 1 | 0 | 0 | 0 | 0 |
| 77  | 79  | 1 | 0 | 0 | 0 | 0 |
| 77  | 80  | 1 | 0 | 0 | 0 | 0 |
| 80  | 81  | 1 | 0 | 0 | 0 | 0 |
| 80  | 82  | 1 | 0 | 0 | 0 | 0 |
| 80  | 83  | 1 | 0 | 0 | 0 | 0 |
| 83  | 84  | 1 | 0 | 0 | 0 | 0 |
| 84  | 85  | 1 | 0 | 0 | 0 | 0 |
| 84  | 86  | 1 | 0 | 0 | 0 | 0 |
| 84  | 87  | 1 | 0 | 0 | 0 | 0 |
| 87  | 88  | 1 | 0 | 0 | 0 | 0 |
| 87  | 89  | 1 | 0 | 0 | 0 | 0 |
| 87  | 90  | 1 | 0 | 0 | 0 | 0 |
| 90  | 91  | 1 | 0 | 0 | 0 | 0 |
| 90  | 108 | 2 | 0 | 0 | 0 | 0 |
| 91  | 92  | 1 | 0 | 0 | 0 | 0 |
| 92  | 93  | 1 | 0 | 0 | 0 | 0 |
| 92  | 94  | 1 | 0 | 0 | 0 | 0 |
| 92  | 110 | 1 | 0 | 0 | 0 | 0 |
| 94  | 95  | 1 | 0 | 0 | 0 | 0 |
| 94  | 96  | 1 | 0 | 0 | 0 | 0 |
| 94  | 97  | 1 | 0 | 0 | 0 | 0 |
| 97  | 98  | 1 | 0 | 0 | 0 | 0 |
| 97  | 99  | 1 | 0 | 0 | 0 | 0 |
| 97  | 100 | 1 | 0 | 0 | 0 | 0 |
| 100 | 101 | 1 | 0 | 0 | 0 | 0 |
| 101 | 102 | 1 | 0 | 0 | 0 | 0 |
| 101 | 109 | 2 | 0 | 0 | 0 | 0 |
| 102 | 103 | 1 | 0 | 0 | 0 | 0 |
| 102 | 104 | 1 | 0 | 0 | 0 | 0 |
| 102 | 105 | 1 | 0 | 0 | 0 | 0 |
| 105 | 106 | 1 | 0 | 0 | 0 | 0 |
| 105 | 107 | 1 | 0 | 0 | 0 | 0 |
| 105 | 139 | 1 | 0 | 0 | 0 | 0 |
| 110 | 111 | 1 | 0 | 0 | 0 | 0 |
| 110 | 112 | 1 | 0 | 0 | 0 | 0 |
| 110 | 113 | 1 | 0 | 0 | 0 | 0 |
| 114 | 115 | 1 | 0 | 0 | 0 | 0 |
| 114 | 121 | 2 | 0 | 0 | 0 | 0 |
| 114 | 123 | 1 | 0 | 0 | 0 | 0 |
| 115 | 116 | 2 | 0 | 0 | 0 | 0 |
| 115 | 124 | 1 | 0 | 0 | 0 | 0 |
| 116 | 117 | 1 | 0 | 0 | 0 | 0 |
| 116 | 118 | 1 | 0 | 0 | 0 | 0 |
| 118 | 119 | 2 | 0 | 0 | 0 | 0 |
| 118 | 133 | 1 | 0 | 0 | 0 | 0 |
| 119 | 120 | 1 | 0 | 0 | 0 | 0 |
| 119 | 121 | 1 | 0 | 0 | 0 | 0 |
| 121 | 122 | 1 | 0 | 0 | 0 | 0 |
| 123 | 129 | 1 | 0 | 0 | 0 | 0 |
| 124 | 125 | 1 | 0 | 0 | 0 | 0 |
| 125 | 126 | 1 | 0 | 0 | 0 | 0 |
| 125 | 127 | 1 | 0 | 0 | 0 | 0 |
| 125 | 128 | 1 | 0 | 0 | 0 | 0 |
| 129 | 130 | 1 | 0 | 0 | 0 | 0 |
| 129 | 131 | 1 | 0 | 0 | 0 | 0 |
| 129 | 132 | 1 | 0 | 0 | 0 | 0 |
| 133 | 134 | 1 | 0 | 0 | 0 | 0 |
| 133 | 135 | 1 | 0 | 0 | 0 | 0 |
| 133 | 136 | 1 | 0 | 0 | 0 | 0 |
| 136 | 137 | 1 | 0 | 0 | 0 | 0 |
| 136 | 138 | 1 | 0 | 0 | 0 | 0 |
| 136 | 139 | 1 | 0 | 0 | 0 | 0 |
| 139 | 140 | 1 | 0 | 0 | 0 | 0 |
| 140 | 141 | 1 | 0 | 0 | 0 | 0 |
| 140 | 142 | 1 | 0 | 0 | 0 | 0 |
| 140 | 143 | 1 | 0 | 0 | 0 | 0 |
| 143 | 144 | 1 | 0 | 0 | 0 | 0 |
| 143 | 145 | 1 | 0 | 0 | 0 | 0 |
| 143 | 146 | 1 | 0 | 0 | 0 | 0 |
| 146 | 147 | 1 | 0 | 0 | 0 | 0 |
| 146 | 164 | 2 | 0 | 0 | 0 | 0 |
| 147 | 148 | 1 | 0 | 0 | 0 | 0 |
| 148 | 149 | 1 | 0 | 0 | 0 | 0 |

|        |   |   |   |   |   |
|--------|---|---|---|---|---|
| 148150 | 1 | 0 | 0 | 0 | 0 |
| 148166 | 1 | 0 | 0 | 0 | 0 |
| 150151 | 1 | 0 | 0 | 0 | 0 |
| 150152 | 1 | 0 | 0 | 0 | 0 |
| 150153 | 1 | 0 | 0 | 0 | 0 |
| 153154 | 1 | 0 | 0 | 0 | 0 |
| 153155 | 1 | 0 | 0 | 0 | 0 |
| 153156 | 1 | 0 | 0 | 0 | 0 |
| 156157 | 1 | 0 | 0 | 0 | 0 |
| 157158 | 1 | 0 | 0 | 0 | 0 |
| 157165 | 2 | 0 | 0 | 0 | 0 |
| 158159 | 1 | 0 | 0 | 0 | 0 |
| 158160 | 1 | 0 | 0 | 0 | 0 |
| 158161 | 1 | 0 | 0 | 0 | 0 |
| 161162 | 1 | 0 | 0 | 0 | 0 |
| 161163 | 1 | 0 | 0 | 0 | 0 |
| 161195 | 1 | 0 | 0 | 0 | 0 |
| 166167 | 1 | 0 | 0 | 0 | 0 |
| 166168 | 1 | 0 | 0 | 0 | 0 |
| 166169 | 1 | 0 | 0 | 0 | 0 |
| 170171 | 1 | 0 | 0 | 0 | 0 |
| 170177 | 2 | 0 | 0 | 0 | 0 |
| 170179 | 1 | 0 | 0 | 0 | 0 |
| 171172 | 2 | 0 | 0 | 0 | 0 |
| 171180 | 1 | 0 | 0 | 0 | 0 |
| 172173 | 1 | 0 | 0 | 0 | 0 |
| 172174 | 1 | 0 | 0 | 0 | 0 |
| 174175 | 2 | 0 | 0 | 0 | 0 |
| 174189 | 1 | 0 | 0 | 0 | 0 |
| 175176 | 1 | 0 | 0 | 0 | 0 |
| 175177 | 1 | 0 | 0 | 0 | 0 |
| 177178 | 1 | 0 | 0 | 0 | 0 |
| 179185 | 1 | 0 | 0 | 0 | 0 |
| 180181 | 1 | 0 | 0 | 0 | 0 |
| 181182 | 1 | 0 | 0 | 0 | 0 |
| 181183 | 1 | 0 | 0 | 0 | 0 |
| 181184 | 1 | 0 | 0 | 0 | 0 |
| 185186 | 1 | 0 | 0 | 0 | 0 |
| 185187 | 1 | 0 | 0 | 0 | 0 |
| 185188 | 1 | 0 | 0 | 0 | 0 |
| 189190 | 1 | 0 | 0 | 0 | 0 |
| 189191 | 1 | 0 | 0 | 0 | 0 |
| 189192 | 1 | 0 | 0 | 0 | 0 |
| 192193 | 1 | 0 | 0 | 0 | 0 |
| 192194 | 1 | 0 | 0 | 0 | 0 |
| 192195 | 1 | 0 | 0 | 0 | 0 |
| 195196 | 1 | 0 | 0 | 0 | 0 |
| 196197 | 1 | 0 | 0 | 0 | 0 |
| 196198 | 1 | 0 | 0 | 0 | 0 |
| 196199 | 1 | 0 | 0 | 0 | 0 |
| 199200 | 1 | 0 | 0 | 0 | 0 |
| 199201 | 1 | 0 | 0 | 0 | 0 |
| 199202 | 1 | 0 | 0 | 0 | 0 |
| 202203 | 1 | 0 | 0 | 0 | 0 |
| 202220 | 2 | 0 | 0 | 0 | 0 |
| 203204 | 1 | 0 | 0 | 0 | 0 |
| 204205 | 1 | 0 | 0 | 0 | 0 |
| 204206 | 1 | 0 | 0 | 0 | 0 |
| 204222 | 1 | 0 | 0 | 0 | 0 |
| 206207 | 1 | 0 | 0 | 0 | 0 |
| 206208 | 1 | 0 | 0 | 0 | 0 |
| 206209 | 1 | 0 | 0 | 0 | 0 |
| 209210 | 1 | 0 | 0 | 0 | 0 |
| 209211 | 1 | 0 | 0 | 0 | 0 |
| 209212 | 1 | 0 | 0 | 0 | 0 |
| 212213 | 1 | 0 | 0 | 0 | 0 |
| 213214 | 1 | 0 | 0 | 0 | 0 |
| 213221 | 2 | 0 | 0 | 0 | 0 |
| 214215 | 1 | 0 | 0 | 0 | 0 |
| 214216 | 1 | 0 | 0 | 0 | 0 |
| 214217 | 1 | 0 | 0 | 0 | 0 |
| 217218 | 1 | 0 | 0 | 0 | 0 |
| 217219 | 1 | 0 | 0 | 0 | 0 |
| 217251 | 1 | 0 | 0 | 0 | 0 |
| 222223 | 1 | 0 | 0 | 0 | 0 |
| 222224 | 1 | 0 | 0 | 0 | 0 |
| 222225 | 1 | 0 | 0 | 0 | 0 |
| 226227 | 1 | 0 | 0 | 0 | 0 |
| 226233 | 2 | 0 | 0 | 0 | 0 |
| 226235 | 1 | 0 | 0 | 0 | 0 |
| 227228 | 2 | 0 | 0 | 0 | 0 |

|        |   |   |   |   |   |
|--------|---|---|---|---|---|
| 227236 | 1 | 0 | 0 | 0 | 0 |
| 228229 | 1 | 0 | 0 | 0 | 0 |
| 228230 | 1 | 0 | 0 | 0 | 0 |
| 230231 | 2 | 0 | 0 | 0 | 0 |
| 230245 | 1 | 0 | 0 | 0 | 0 |
| 231232 | 1 | 0 | 0 | 0 | 0 |
| 231233 | 1 | 0 | 0 | 0 | 0 |
| 233234 | 1 | 0 | 0 | 0 | 0 |
| 235241 | 1 | 0 | 0 | 0 | 0 |
| 236237 | 1 | 0 | 0 | 0 | 0 |
| 237238 | 1 | 0 | 0 | 0 | 0 |
| 237239 | 1 | 0 | 0 | 0 | 0 |
| 237240 | 1 | 0 | 0 | 0 | 0 |
| 241242 | 1 | 0 | 0 | 0 | 0 |
| 241243 | 1 | 0 | 0 | 0 | 0 |
| 241244 | 1 | 0 | 0 | 0 | 0 |
| 245246 | 1 | 0 | 0 | 0 | 0 |
| 245247 | 1 | 0 | 0 | 0 | 0 |
| 245248 | 1 | 0 | 0 | 0 | 0 |
| 248249 | 1 | 0 | 0 | 0 | 0 |
| 248250 | 1 | 0 | 0 | 0 | 0 |
| 248251 | 1 | 0 | 0 | 0 | 0 |
| 251252 | 1 | 0 | 0 | 0 | 0 |
| 252253 | 1 | 0 | 0 | 0 | 0 |
| 252254 | 1 | 0 | 0 | 0 | 0 |
| 252255 | 1 | 0 | 0 | 0 | 0 |
| 255256 | 1 | 0 | 0 | 0 | 0 |
| 255257 | 1 | 0 | 0 | 0 | 0 |
| 255258 | 1 | 0 | 0 | 0 | 0 |
| 258259 | 1 | 0 | 0 | 0 | 0 |
| 258276 | 2 | 0 | 0 | 0 | 0 |
| 259260 | 1 | 0 | 0 | 0 | 0 |
| 260261 | 1 | 0 | 0 | 0 | 0 |
| 260262 | 1 | 0 | 0 | 0 | 0 |
| 260278 | 1 | 0 | 0 | 0 | 0 |
| 262263 | 1 | 0 | 0 | 0 | 0 |
| 262264 | 1 | 0 | 0 | 0 | 0 |
| 262265 | 1 | 0 | 0 | 0 | 0 |
| 265266 | 1 | 0 | 0 | 0 | 0 |
| 265267 | 1 | 0 | 0 | 0 | 0 |
| 265268 | 1 | 0 | 0 | 0 | 0 |
| 268269 | 1 | 0 | 0 | 0 | 0 |
| 269270 | 1 | 0 | 0 | 0 | 0 |
| 269277 | 2 | 0 | 0 | 0 | 0 |
| 270271 | 1 | 0 | 0 | 0 | 0 |
| 270272 | 1 | 0 | 0 | 0 | 0 |
| 270273 | 1 | 0 | 0 | 0 | 0 |
| 273274 | 1 | 0 | 0 | 0 | 0 |
| 273275 | 1 | 0 | 0 | 0 | 0 |
| 273307 | 1 | 0 | 0 | 0 | 0 |
| 278279 | 1 | 0 | 0 | 0 | 0 |
| 278280 | 1 | 0 | 0 | 0 | 0 |
| 278281 | 1 | 0 | 0 | 0 | 0 |
| 282283 | 1 | 0 | 0 | 0 | 0 |
| 282289 | 2 | 0 | 0 | 0 | 0 |
| 282291 | 1 | 0 | 0 | 0 | 0 |
| 283284 | 2 | 0 | 0 | 0 | 0 |
| 283292 | 1 | 0 | 0 | 0 | 0 |
| 284285 | 1 | 0 | 0 | 0 | 0 |
| 284286 | 1 | 0 | 0 | 0 | 0 |
| 286287 | 2 | 0 | 0 | 0 | 0 |
| 286301 | 1 | 0 | 0 | 0 | 0 |
| 287288 | 1 | 0 | 0 | 0 | 0 |
| 287289 | 1 | 0 | 0 | 0 | 0 |
| 289290 | 1 | 0 | 0 | 0 | 0 |
| 291297 | 1 | 0 | 0 | 0 | 0 |
| 292293 | 1 | 0 | 0 | 0 | 0 |
| 293294 | 1 | 0 | 0 | 0 | 0 |
| 293295 | 1 | 0 | 0 | 0 | 0 |
| 293296 | 1 | 0 | 0 | 0 | 0 |
| 297298 | 1 | 0 | 0 | 0 | 0 |
| 297299 | 1 | 0 | 0 | 0 | 0 |
| 297300 | 1 | 0 | 0 | 0 | 0 |
| 301302 | 1 | 0 | 0 | 0 | 0 |
| 301303 | 1 | 0 | 0 | 0 | 0 |
| 301304 | 1 | 0 | 0 | 0 | 0 |
| 304305 | 1 | 0 | 0 | 0 | 0 |
| 304306 | 1 | 0 | 0 | 0 | 0 |
| 304307 | 1 | 0 | 0 | 0 | 0 |
| 307308 | 1 | 0 | 0 | 0 | 0 |

M END









|    |    |   |   |   |   |   |
|----|----|---|---|---|---|---|
| 12 | 13 | 1 | 0 | 0 | 0 | 0 |
| 12 | 26 | 1 | 0 | 0 | 0 | 0 |
| 14 | 15 | 1 | 0 | 0 | 0 | 0 |
| 14 | 16 | 1 | 0 | 0 | 0 | 0 |
| 14 | 17 | 1 | 0 | 0 | 0 | 0 |
| 14 | 41 | 1 | 0 | 0 | 0 | 0 |
| 17 | 18 | 1 | 0 | 0 | 0 | 0 |
| 18 | 19 | 1 | 0 | 0 | 0 | 0 |
| 18 | 25 | 2 | 0 | 0 | 0 | 0 |
| 19 | 20 | 1 | 0 | 0 | 0 | 0 |
| 19 | 21 | 1 | 0 | 0 | 0 | 0 |
| 19 | 22 | 1 | 0 | 0 | 0 | 0 |
| 22 | 23 | 1 | 0 | 0 | 0 | 0 |
| 22 | 24 | 1 | 0 | 0 | 0 | 0 |
| 22 | 55 | 1 | 0 | 0 | 0 | 0 |
| 26 | 27 | 1 | 0 | 0 | 0 | 0 |
| 26 | 28 | 1 | 0 | 0 | 0 | 0 |
| 26 | 29 | 1 | 0 | 0 | 0 | 0 |
| 29 | 30 | 1 | 0 | 0 | 0 | 0 |
| 29 | 31 | 1 | 0 | 0 | 0 | 0 |
| 29 | 32 | 1 | 0 | 0 | 0 | 0 |
| 32 | 33 | 1 | 0 | 0 | 0 | 0 |
| 32 | 40 | 2 | 0 | 0 | 0 | 0 |
| 33 | 34 | 1 | 0 | 0 | 0 | 0 |
| 34 | 35 | 1 | 0 | 0 | 0 | 0 |
| 34 | 36 | 1 | 0 | 0 | 0 | 0 |
| 34 | 37 | 1 | 0 | 0 | 0 | 0 |
| 37 | 38 | 1 | 0 | 0 | 0 | 0 |
| 37 | 39 | 1 | 0 | 0 | 0 | 0 |
| 37 | 41 | 1 | 0 | 0 | 0 | 0 |
| 41 | 42 | 1 | 0 | 0 | 0 | 0 |
| 41 | 43 | 1 | 0 | 0 | 0 | 0 |
| 44 | 45 | 1 | 0 | 0 | 0 | 0 |
| 44 | 46 | 1 | 0 | 0 | 0 | 0 |
| 46 | 47 | 1 | 0 | 0 | 0 | 0 |
| 46 | 48 | 1 | 0 | 0 | 0 | 0 |
| 46 | 49 | 1 | 0 | 0 | 0 | 0 |
| 49 | 50 | 1 | 0 | 0 | 0 | 0 |
| 49 | 51 | 1 | 0 | 0 | 0 | 0 |
| 49 | 52 | 1 | 0 | 0 | 0 | 0 |
| 52 | 53 | 1 | 0 | 0 | 0 | 0 |
| 52 | 54 | 1 | 0 | 0 | 0 | 0 |
| 52 | 55 | 1 | 0 | 0 | 0 | 0 |
| 55 | 68 | 1 | 0 | 0 | 0 | 0 |
| 56 | 57 | 1 | 0 | 0 | 0 | 0 |
| 56 | 58 | 1 | 0 | 0 | 0 | 0 |
| 56 | 59 | 1 | 0 | 0 | 0 | 0 |
| 56 | 83 | 1 | 0 | 0 | 0 | 0 |
| 59 | 60 | 1 | 0 | 0 | 0 | 0 |
| 60 | 61 | 1 | 0 | 0 | 0 | 0 |
| 60 | 67 | 2 | 0 | 0 | 0 | 0 |
| 61 | 62 | 1 | 0 | 0 | 0 | 0 |
| 61 | 63 | 1 | 0 | 0 | 0 | 0 |
| 61 | 64 | 1 | 0 | 0 | 0 | 0 |
| 64 | 65 | 1 | 0 | 0 | 0 | 0 |
| 64 | 66 | 1 | 0 | 0 | 0 | 0 |
| 64 | 97 | 1 | 0 | 0 | 0 | 0 |
| 68 | 69 | 1 | 0 | 0 | 0 | 0 |
| 68 | 70 | 1 | 0 | 0 | 0 | 0 |
| 68 | 71 | 1 | 0 | 0 | 0 | 0 |
| 71 | 72 | 1 | 0 | 0 | 0 | 0 |
| 71 | 73 | 1 | 0 | 0 | 0 | 0 |
| 71 | 74 | 1 | 0 | 0 | 0 | 0 |
| 74 | 75 | 1 | 0 | 0 | 0 | 0 |
| 74 | 82 | 2 | 0 | 0 | 0 | 0 |
| 75 | 76 | 1 | 0 | 0 | 0 | 0 |
| 76 | 77 | 1 | 0 | 0 | 0 | 0 |
| 76 | 78 | 1 | 0 | 0 | 0 | 0 |
| 76 | 79 | 1 | 0 | 0 | 0 | 0 |
| 79 | 80 | 1 | 0 | 0 | 0 | 0 |
| 79 | 81 | 1 | 0 | 0 | 0 | 0 |
| 79 | 83 | 1 | 0 | 0 | 0 | 0 |
| 83 | 84 | 1 | 0 | 0 | 0 | 0 |
| 83 | 85 | 1 | 0 | 0 | 0 | 0 |
| 86 | 87 | 1 | 0 | 0 | 0 | 0 |
| 86 | 88 | 1 | 0 | 0 | 0 | 0 |
| 88 | 89 | 1 | 0 | 0 | 0 | 0 |
| 88 | 90 | 1 | 0 | 0 | 0 | 0 |
| 88 | 91 | 1 | 0 | 0 | 0 | 0 |
| 91 | 92 | 1 | 0 | 0 | 0 | 0 |
| 91 | 93 | 1 | 0 | 0 | 0 | 0 |

|     |     |   |   |   |   |   |
|-----|-----|---|---|---|---|---|
| 91  | 94  | 1 | 0 | 0 | 0 | 0 |
| 94  | 95  | 1 | 0 | 0 | 0 | 0 |
| 94  | 96  | 1 | 0 | 0 | 0 | 0 |
| 94  | 97  | 1 | 0 | 0 | 0 | 0 |
| 97  | 110 | 1 | 0 | 0 | 0 | 0 |
| 98  | 99  | 1 | 0 | 0 | 0 | 0 |
| 98  | 100 | 1 | 0 | 0 | 0 | 0 |
| 98  | 101 | 1 | 0 | 0 | 0 | 0 |
| 98  | 125 | 1 | 0 | 0 | 0 | 0 |
| 101 | 102 | 1 | 0 | 0 | 0 | 0 |
| 102 | 103 | 1 | 0 | 0 | 0 | 0 |
| 102 | 109 | 2 | 0 | 0 | 0 | 0 |
| 103 | 104 | 1 | 0 | 0 | 0 | 0 |
| 103 | 105 | 1 | 0 | 0 | 0 | 0 |
| 103 | 106 | 1 | 0 | 0 | 0 | 0 |
| 106 | 107 | 1 | 0 | 0 | 0 | 0 |
| 106 | 108 | 1 | 0 | 0 | 0 | 0 |
| 106 | 139 | 1 | 0 | 0 | 0 | 0 |
| 110 | 111 | 1 | 0 | 0 | 0 | 0 |
| 110 | 112 | 1 | 0 | 0 | 0 | 0 |
| 110 | 113 | 1 | 0 | 0 | 0 | 0 |
| 113 | 114 | 1 | 0 | 0 | 0 | 0 |
| 113 | 115 | 1 | 0 | 0 | 0 | 0 |
| 113 | 116 | 1 | 0 | 0 | 0 | 0 |
| 116 | 117 | 1 | 0 | 0 | 0 | 0 |
| 116 | 124 | 2 | 0 | 0 | 0 | 0 |
| 117 | 118 | 1 | 0 | 0 | 0 | 0 |
| 118 | 119 | 1 | 0 | 0 | 0 | 0 |
| 118 | 120 | 1 | 0 | 0 | 0 | 0 |
| 118 | 121 | 1 | 0 | 0 | 0 | 0 |
| 121 | 122 | 1 | 0 | 0 | 0 | 0 |
| 121 | 123 | 1 | 0 | 0 | 0 | 0 |
| 121 | 125 | 1 | 0 | 0 | 0 | 0 |
| 125 | 126 | 1 | 0 | 0 | 0 | 0 |
| 125 | 127 | 1 | 0 | 0 | 0 | 0 |
| 128 | 129 | 1 | 0 | 0 | 0 | 0 |
| 128 | 130 | 1 | 0 | 0 | 0 | 0 |
| 130 | 131 | 1 | 0 | 0 | 0 | 0 |
| 130 | 132 | 1 | 0 | 0 | 0 | 0 |
| 130 | 133 | 1 | 0 | 0 | 0 | 0 |
| 133 | 134 | 1 | 0 | 0 | 0 | 0 |
| 133 | 135 | 1 | 0 | 0 | 0 | 0 |
| 133 | 136 | 1 | 0 | 0 | 0 | 0 |
| 136 | 137 | 1 | 0 | 0 | 0 | 0 |
| 136 | 138 | 1 | 0 | 0 | 0 | 0 |
| 136 | 139 | 1 | 0 | 0 | 0 | 0 |
| 139 | 152 | 1 | 0 | 0 | 0 | 0 |
| 140 | 141 | 1 | 0 | 0 | 0 | 0 |
| 140 | 142 | 1 | 0 | 0 | 0 | 0 |
| 140 | 143 | 1 | 0 | 0 | 0 | 0 |
| 140 | 167 | 1 | 0 | 0 | 0 | 0 |
| 143 | 144 | 1 | 0 | 0 | 0 | 0 |
| 144 | 145 | 1 | 0 | 0 | 0 | 0 |
| 144 | 151 | 2 | 0 | 0 | 0 | 0 |
| 145 | 146 | 1 | 0 | 0 | 0 | 0 |
| 145 | 147 | 1 | 0 | 0 | 0 | 0 |
| 145 | 148 | 1 | 0 | 0 | 0 | 0 |
| 148 | 149 | 1 | 0 | 0 | 0 | 0 |
| 148 | 150 | 1 | 0 | 0 | 0 | 0 |
| 148 | 181 | 1 | 0 | 0 | 0 | 0 |
| 152 | 153 | 1 | 0 | 0 | 0 | 0 |
| 152 | 154 | 1 | 0 | 0 | 0 | 0 |
| 152 | 155 | 1 | 0 | 0 | 0 | 0 |
| 155 | 156 | 1 | 0 | 0 | 0 | 0 |
| 155 | 157 | 1 | 0 | 0 | 0 | 0 |
| 155 | 158 | 1 | 0 | 0 | 0 | 0 |
| 158 | 159 | 1 | 0 | 0 | 0 | 0 |
| 158 | 166 | 2 | 0 | 0 | 0 | 0 |
| 159 | 160 | 1 | 0 | 0 | 0 | 0 |
| 160 | 161 | 1 | 0 | 0 | 0 | 0 |
| 160 | 162 | 1 | 0 | 0 | 0 | 0 |
| 160 | 163 | 1 | 0 | 0 | 0 | 0 |
| 163 | 164 | 1 | 0 | 0 | 0 | 0 |
| 163 | 165 | 1 | 0 | 0 | 0 | 0 |
| 163 | 167 | 1 | 0 | 0 | 0 | 0 |
| 167 | 168 | 1 | 0 | 0 | 0 | 0 |
| 167 | 169 | 1 | 0 | 0 | 0 | 0 |
| 170 | 171 | 1 | 0 | 0 | 0 | 0 |
| 170 | 172 | 1 | 0 | 0 | 0 | 0 |
| 172 | 173 | 1 | 0 | 0 | 0 | 0 |
| 172 | 174 | 1 | 0 | 0 | 0 | 0 |

```

172175 1 0 0 0 0
175176 1 0 0 0 0
175177 1 0 0 0 0
175178 1 0 0 0 0
178179 1 0 0 0 0
178180 1 0 0 0 0
178181 1 0 0 0 0
181194 1 0 0 0 0
182183 1 0 0 0 0
182184 1 0 0 0 0
182185 1 0 0 0 0
182209 1 0 0 0 0
185186 1 0 0 0 0
186187 1 0 0 0 0
186193 2 0 0 0 0
187188 1 0 0 0 0
187189 1 0 0 0 0
187190 1 0 0 0 0
190191 1 0 0 0 0
190192 1 0 0 0 0
190223 1 0 0 0 0
194195 1 0 0 0 0
194196 1 0 0 0 0
194197 1 0 0 0 0
197198 1 0 0 0 0
197199 1 0 0 0 0
197200 1 0 0 0 0
200201 1 0 0 0 0
200208 2 0 0 0 0
201202 1 0 0 0 0
202203 1 0 0 0 0
202204 1 0 0 0 0
202205 1 0 0 0 0
205206 1 0 0 0 0
205207 1 0 0 0 0
205209 1 0 0 0 0
209210 1 0 0 0 0
209211 1 0 0 0 0
212213 1 0 0 0 0
212214 1 0 0 0 0
214215 1 0 0 0 0
214216 1 0 0 0 0
214217 1 0 0 0 0
217218 1 0 0 0 0
217219 1 0 0 0 0
217220 1 0 0 0 0
220221 1 0 0 0 0
220222 1 0 0 0 0
220223 1 0 0 0 0
223224 1 0 0 0 0

```

```

M END
> <NAME>
C20_12

```

```

$$$$
C25_12
MOE2012 3D

```

```

230229 0 0 1 0 0 0 0 0999 V2000
30.5270 -0.6530 -28.7730 O 0 0 0 0 0 0 0 0 0 0 0 0 0 0 0 0
29.9750 -0.0380 -29.2840 H 0 0 0 0 0 0 0 0 0 0 0 0 0 0 0 0
29.6860 -1.7190 -28.3430 C 0 0 0 0 0 0 0 0 0 0 0 0 0 0 0 0
28.9760 -1.2830 -27.6340 H 0 0 0 0 0 0 0 0 0 0 0 0 0 0 0 0
29.1150 -2.0920 -29.2010 H 0 0 0 0 0 0 0 0 0 0 0 0 0 0 0 0
30.5190 -2.8430 -27.6880 C 0 0 0 0 0 0 0 0 0 0 0 0 0 0 0 0
31.4050 -2.4000 -27.2140 H 0 0 0 0 0 0 0 0 0 0 0 0 0 0 0 0
31.0320 -3.8430 -28.7470 C 0 0 0 0 0 0 0 0 0 0 0 0 0 0 0 0
31.6000 -4.6450 -28.2610 H 0 0 0 0 0 0 0 0 0 0 0 0 0 0 0 0
30.1990 -4.2990 -29.2940 H 0 0 0 0 0 0 0 0 0 0 0 0 0 0 0 0
31.8940 -3.2180 -29.6890 O 0 0 0 0 0 0 0 0 0 0 0 0 0 0 0 0
32.2350 -3.9190 -30.2690 H 0 0 0 0 0 0 0 0 0 0 0 0 0 0 0 0
29.7400 -3.6160 -26.6980 N 0 0 3 0 0 0 0 0 0 0 0 0 0 0 0 0
28.8000 -3.7960 -27.0530 H 0 0 0 0 0 0 0 0 0 0 0 0 0 0 0 0
26.5170 -5.0850 -17.6990 C 0 0 0 0 0 0 0 0 0 0 0 0 0 0 0 0
27.1000 -6.0140 -17.6900 H 0 0 0 0 0 0 0 0 0 0 0 0 0 0 0 0
25.5130 -5.2840 -18.0910 H 0 0 0 0 0 0 0 0 0 0 0 0 0 0 0 0
26.4130 -4.5730 -16.3630 O 0 0 0 0 0 0 0 0 0 0 0 0 0 0 0 0
25.8270 -5.4250 -15.4740 C 0 0 0 0 0 0 0 0 0 0 0 0 0 0 0 0
25.7860 -4.7790 -14.1070 C 0 0 0 0 0 0 0 0 0 0 0 0 0 0 0 0
26.8190 -4.6140 -13.7870 H 0 0 0 0 0 0 0 0 0 0 0 0 0 0 0 0
25.2760 -3.8130 -14.2040 H 0 0 0 0 0 0 0 0 0 0 0 0 0 0 0 0

```





|         |         |          |   |   |   |   |   |   |   |   |   |   |   |   |   |   |
|---------|---------|----------|---|---|---|---|---|---|---|---|---|---|---|---|---|---|
| 41.4290 | 16.1780 | -14.0310 | H | 0 | 0 | 0 | 0 | 0 | 0 | 0 | 0 | 0 | 0 | 0 | 0 | 0 |
| 38.6890 | 15.3330 | -11.4140 | N | 0 | 0 | 3 | 0 | 0 | 0 | 0 | 0 | 0 | 0 | 0 | 0 | 0 |
| 29.0080 | 15.0020 | -12.2260 | C | 0 | 0 | 0 | 0 | 0 | 0 | 0 | 0 | 0 | 0 | 0 | 0 | 0 |
| 28.9330 | 14.7560 | -11.1600 | H | 0 | 0 | 0 | 0 | 0 | 0 | 0 | 0 | 0 | 0 | 0 | 0 | 0 |
| 29.1240 | 14.0810 | -12.8090 | H | 0 | 0 | 0 | 0 | 0 | 0 | 0 | 0 | 0 | 0 | 0 | 0 | 0 |
| 27.8180 | 15.6840 | -12.6430 | O | 0 | 0 | 0 | 0 | 0 | 0 | 0 | 0 | 0 | 0 | 0 | 0 | 0 |
| 26.6700 | 14.9680 | -12.4770 | C | 0 | 0 | 0 | 0 | 0 | 0 | 0 | 0 | 0 | 0 | 0 | 0 | 0 |
| 25.5000 | 15.7880 | -12.9580 | C | 0 | 0 | 0 | 0 | 0 | 0 | 0 | 0 | 0 | 0 | 0 | 0 | 0 |
| 25.4830 | 16.7270 | -12.3930 | H | 0 | 0 | 0 | 0 | 0 | 0 | 0 | 0 | 0 | 0 | 0 | 0 | 0 |
| 25.6650 | 16.0070 | -14.0180 | H | 0 | 0 | 0 | 0 | 0 | 0 | 0 | 0 | 0 | 0 | 0 | 0 | 0 |
| 24.1840 | 15.0370 | -12.7620 | C | 0 | 0 | 0 | 0 | 0 | 0 | 0 | 0 | 0 | 0 | 0 | 0 | 0 |
| 24.1920 | 14.0860 | -13.3060 | H | 0 | 0 | 0 | 0 | 0 | 0 | 0 | 0 | 0 | 0 | 0 | 0 | 0 |
| 24.0880 | 14.7570 | -11.7050 | H | 0 | 0 | 0 | 0 | 0 | 0 | 0 | 0 | 0 | 0 | 0 | 0 | 0 |
| 26.6010 | 13.8390 | -12.0150 | O | 0 | 0 | 0 | 0 | 0 | 0 | 0 | 0 | 0 | 0 | 0 | 0 | 0 |
| 37.5140 | 16.1680 | -11.7450 | C | 0 | 0 | 0 | 0 | 0 | 0 | 0 | 0 | 0 | 0 | 0 | 0 | 0 |
| 37.5430 | 17.1190 | -11.1980 | H | 0 | 0 | 0 | 0 | 0 | 0 | 0 | 0 | 0 | 0 | 0 | 0 | 0 |
| 37.5230 | 16.4310 | -12.8090 | H | 0 | 0 | 0 | 0 | 0 | 0 | 0 | 0 | 0 | 0 | 0 | 0 | 0 |
| 36.1930 | 15.4390 | -11.4810 | C | 0 | 0 | 0 | 0 | 0 | 0 | 0 | 0 | 0 | 0 | 0 | 0 | 0 |
| 36.1870 | 14.4810 | -12.0140 | H | 0 | 0 | 0 | 0 | 0 | 0 | 0 | 0 | 0 | 0 | 0 | 0 | 0 |
| 36.0440 | 15.2570 | -10.4130 | H | 0 | 0 | 0 | 0 | 0 | 0 | 0 | 0 | 0 | 0 | 0 | 0 | 0 |
| 35.0240 | 16.2580 | -11.9750 | C | 0 | 0 | 0 | 0 | 0 | 0 | 0 | 0 | 0 | 0 | 0 | 0 | 0 |
| 33.8770 | 15.5320 | -11.8460 | O | 0 | 0 | 0 | 0 | 0 | 0 | 0 | 0 | 0 | 0 | 0 | 0 | 0 |
| 32.6920 | 16.2120 | -12.2800 | C | 0 | 0 | 0 | 0 | 0 | 0 | 0 | 0 | 0 | 0 | 0 | 0 | 0 |
| 32.5680 | 17.1350 | -11.7020 | H | 0 | 0 | 0 | 0 | 0 | 0 | 0 | 0 | 0 | 0 | 0 | 0 | 0 |
| 32.7780 | 16.4520 | -13.3460 | H | 0 | 0 | 0 | 0 | 0 | 0 | 0 | 0 | 0 | 0 | 0 | 0 | 0 |
| 31.5060 | 15.2830 | -12.0440 | C | 0 | 0 | 0 | 0 | 0 | 0 | 0 | 0 | 0 | 0 | 0 | 0 | 0 |
| 31.6640 | 14.3470 | -12.5930 | H | 0 | 0 | 0 | 0 | 0 | 0 | 0 | 0 | 0 | 0 | 0 | 0 | 0 |
| 31.4680 | 15.0060 | -10.9830 | H | 0 | 0 | 0 | 0 | 0 | 0 | 0 | 0 | 0 | 0 | 0 | 0 | 0 |
| 35.0910 | 17.3980 | -12.4130 | O | 0 | 0 | 0 | 0 | 0 | 0 | 0 | 0 | 0 | 0 | 0 | 0 | 0 |
| 30.1930 | 15.9290 | -12.4680 | C | 0 | 0 | 0 | 0 | 0 | 0 | 0 | 0 | 0 | 0 | 0 | 0 | 0 |
| 30.2280 | 16.2040 | -13.5300 | H | 0 | 0 | 0 | 0 | 0 | 0 | 0 | 0 | 0 | 0 | 0 | 0 | 0 |
| 30.0360 | 16.8680 | -11.9210 | H | 0 | 0 | 0 | 0 | 0 | 0 | 0 | 0 | 0 | 0 | 0 | 0 | 0 |
| 21.4870 | 17.5100 | -16.0470 | O | 0 | 0 | 0 | 0 | 0 | 0 | 0 | 0 | 0 | 0 | 0 | 0 | 0 |
| 20.7370 | 18.1340 | -16.0760 | H | 0 | 0 | 0 | 0 | 0 | 0 | 0 | 0 | 0 | 0 | 0 | 0 | 0 |
| 21.6240 | 17.1090 | -14.6790 | C | 0 | 0 | 0 | 0 | 0 | 0 | 0 | 0 | 0 | 0 | 0 | 0 | 0 |
| 21.6940 | 18.0130 | -14.0630 | H | 0 | 0 | 0 | 0 | 0 | 0 | 0 | 0 | 0 | 0 | 0 | 0 | 0 |
| 20.7210 | 16.5570 | -14.3970 | H | 0 | 0 | 0 | 0 | 0 | 0 | 0 | 0 | 0 | 0 | 0 | 0 | 0 |
| 22.8890 | 16.2350 | -14.5130 | C | 0 | 0 | 0 | 0 | 0 | 0 | 0 | 0 | 0 | 0 | 0 | 0 | 0 |
| 23.7360 | 16.8770 | -14.7850 | H | 0 | 0 | 0 | 0 | 0 | 0 | 0 | 0 | 0 | 0 | 0 | 0 | 0 |
| 22.8460 | 15.0640 | -15.5220 | C | 0 | 0 | 0 | 0 | 0 | 0 | 0 | 0 | 0 | 0 | 0 | 0 | 0 |
| 23.7330 | 14.4300 | -15.4430 | H | 0 | 0 | 0 | 0 | 0 | 0 | 0 | 0 | 0 | 0 | 0 | 0 | 0 |
| 21.9620 | 14.4380 | -15.3610 | H | 0 | 0 | 0 | 0 | 0 | 0 | 0 | 0 | 0 | 0 | 0 | 0 | 0 |
| 22.8110 | 15.5450 | -16.8680 | O | 0 | 0 | 0 | 0 | 0 | 0 | 0 | 0 | 0 | 0 | 0 | 0 | 0 |
| 22.2410 | 16.3540 | -16.8500 | H | 0 | 0 | 0 | 0 | 0 | 0 | 0 | 0 | 0 | 0 | 0 | 0 | 0 |
| 22.9920 | 15.8200 | -13.1050 | N | 0 | 0 | 3 | 0 | 0 | 0 | 0 | 0 | 0 | 0 | 0 | 0 | 0 |
| 22.9550 | 16.6440 | -12.5030 | H | 0 | 0 | 0 | 0 | 0 | 0 | 0 | 0 | 0 | 0 | 0 | 0 | 0 |
| 1       | 2       | 1        | 0 | 0 | 0 | 0 |   |   |   |   |   |   |   |   |   |   |
| 1       | 3       | 1        | 0 | 0 | 0 | 0 |   |   |   |   |   |   |   |   |   |   |
| 3       | 4       | 1        | 0 | 0 | 0 | 0 |   |   |   |   |   |   |   |   |   |   |
| 3       | 5       | 1        | 0 | 0 | 0 | 0 |   |   |   |   |   |   |   |   |   |   |
| 3       | 6       | 1        | 0 | 0 | 0 | 0 |   |   |   |   |   |   |   |   |   |   |
| 6       | 7       | 1        | 0 | 0 | 0 | 0 |   |   |   |   |   |   |   |   |   |   |
| 6       | 8       | 1        | 0 | 0 | 0 | 0 |   |   |   |   |   |   |   |   |   |   |
| 6       | 13      | 1        | 0 | 0 | 0 | 0 |   |   |   |   |   |   |   |   |   |   |
| 8       | 9       | 1        | 0 | 0 | 0 | 0 |   |   |   |   |   |   |   |   |   |   |
| 8       | 10      | 1        | 0 | 0 | 0 | 0 |   |   |   |   |   |   |   |   |   |   |
| 8       | 11      | 1        | 0 | 0 | 0 | 0 |   |   |   |   |   |   |   |   |   |   |
| 11      | 12      | 1        | 0 | 0 | 0 | 0 |   |   |   |   |   |   |   |   |   |   |
| 13      | 14      | 1        | 0 | 0 | 0 | 0 |   |   |   |   |   |   |   |   |   |   |
| 13      | 27      | 1        | 0 | 0 | 0 | 0 |   |   |   |   |   |   |   |   |   |   |
| 15      | 16      | 1        | 0 | 0 | 0 | 0 |   |   |   |   |   |   |   |   |   |   |
| 15      | 17      | 1        | 0 | 0 | 0 | 0 |   |   |   |   |   |   |   |   |   |   |
| 15      | 18      | 1        | 0 | 0 | 0 | 0 |   |   |   |   |   |   |   |   |   |   |
| 15      | 42      | 1        | 0 | 0 | 0 | 0 |   |   |   |   |   |   |   |   |   |   |
| 18      | 19      | 1        | 0 | 0 | 0 | 0 |   |   |   |   |   |   |   |   |   |   |
| 19      | 20      | 1        | 0 | 0 | 0 | 0 |   |   |   |   |   |   |   |   |   |   |
| 19      | 26      | 2        | 0 | 0 | 0 | 0 |   |   |   |   |   |   |   |   |   |   |
| 20      | 21      | 1        | 0 | 0 | 0 | 0 |   |   |   |   |   |   |   |   |   |   |
| 20      | 22      | 1        | 0 | 0 | 0 | 0 |   |   |   |   |   |   |   |   |   |   |
| 20      | 23      | 1        | 0 | 0 | 0 | 0 |   |   |   |   |   |   |   |   |   |   |
| 23      | 24      | 1        | 0 | 0 | 0 | 0 |   |   |   |   |   |   |   |   |   |   |
| 23      | 25      | 1        | 0 | 0 | 0 | 0 |   |   |   |   |   |   |   |   |   |   |
| 23      | 57      | 1        | 0 | 0 | 0 | 0 |   |   |   |   |   |   |   |   |   |   |
| 27      | 28      | 1        | 0 | 0 | 0 | 0 |   |   |   |   |   |   |   |   |   |   |
| 27      | 29      | 1        | 0 | 0 | 0 | 0 |   |   |   |   |   |   |   |   |   |   |
| 27      | 30      | 1        | 0 | 0 | 0 | 0 |   |   |   |   |   |   |   |   |   |   |
| 30      | 31      | 1        | 0 | 0 | 0 | 0 |   |   |   |   |   |   |   |   |   |   |
| 30      | 32      | 1        | 0 | 0 | 0 | 0 |   |   |   |   |   |   |   |   |   |   |
| 30      | 33      | 1        | 0 | 0 | 0 | 0 |   |   |   |   |   |   |   |   |   |   |
| 33      | 34      | 1        | 0 | 0 | 0 | 0 |   |   |   |   |   |   |   |   |   |   |
| 33      | 41      | 2        | 0 | 0 | 0 | 0 |   |   |   |   |   |   |   |   |   |   |

|     |     |   |   |   |   |   |
|-----|-----|---|---|---|---|---|
| 34  | 35  | 1 | 0 | 0 | 0 | 0 |
| 35  | 36  | 1 | 0 | 0 | 0 | 0 |
| 35  | 37  | 1 | 0 | 0 | 0 | 0 |
| 35  | 38  | 1 | 0 | 0 | 0 | 0 |
| 38  | 39  | 1 | 0 | 0 | 0 | 0 |
| 38  | 40  | 1 | 0 | 0 | 0 | 0 |
| 38  | 42  | 1 | 0 | 0 | 0 | 0 |
| 42  | 43  | 1 | 0 | 0 | 0 | 0 |
| 42  | 44  | 1 | 0 | 0 | 0 | 0 |
| 45  | 46  | 1 | 0 | 0 | 0 | 0 |
| 45  | 47  | 1 | 0 | 0 | 0 | 0 |
| 47  | 48  | 1 | 0 | 0 | 0 | 0 |
| 47  | 49  | 1 | 0 | 0 | 0 | 0 |
| 47  | 50  | 1 | 0 | 0 | 0 | 0 |
| 50  | 51  | 1 | 0 | 0 | 0 | 0 |
| 50  | 52  | 1 | 0 | 0 | 0 | 0 |
| 50  | 57  | 1 | 0 | 0 | 0 | 0 |
| 52  | 53  | 1 | 0 | 0 | 0 | 0 |
| 52  | 54  | 1 | 0 | 0 | 0 | 0 |
| 52  | 55  | 1 | 0 | 0 | 0 | 0 |
| 55  | 56  | 1 | 0 | 0 | 0 | 0 |
| 57  | 70  | 1 | 0 | 0 | 0 | 0 |
| 58  | 59  | 1 | 0 | 0 | 0 | 0 |
| 58  | 60  | 1 | 0 | 0 | 0 | 0 |
| 58  | 61  | 1 | 0 | 0 | 0 | 0 |
| 58  | 85  | 1 | 0 | 0 | 0 | 0 |
| 61  | 62  | 1 | 0 | 0 | 0 | 0 |
| 62  | 63  | 1 | 0 | 0 | 0 | 0 |
| 62  | 69  | 2 | 0 | 0 | 0 | 0 |
| 63  | 64  | 1 | 0 | 0 | 0 | 0 |
| 63  | 65  | 1 | 0 | 0 | 0 | 0 |
| 63  | 66  | 1 | 0 | 0 | 0 | 0 |
| 66  | 67  | 1 | 0 | 0 | 0 | 0 |
| 66  | 68  | 1 | 0 | 0 | 0 | 0 |
| 66  | 100 | 1 | 0 | 0 | 0 | 0 |
| 70  | 71  | 1 | 0 | 0 | 0 | 0 |
| 70  | 72  | 1 | 0 | 0 | 0 | 0 |
| 70  | 73  | 1 | 0 | 0 | 0 | 0 |
| 73  | 74  | 1 | 0 | 0 | 0 | 0 |
| 73  | 75  | 1 | 0 | 0 | 0 | 0 |
| 73  | 76  | 1 | 0 | 0 | 0 | 0 |
| 76  | 77  | 1 | 0 | 0 | 0 | 0 |
| 76  | 84  | 2 | 0 | 0 | 0 | 0 |
| 77  | 78  | 1 | 0 | 0 | 0 | 0 |
| 78  | 79  | 1 | 0 | 0 | 0 | 0 |
| 78  | 80  | 1 | 0 | 0 | 0 | 0 |
| 78  | 81  | 1 | 0 | 0 | 0 | 0 |
| 81  | 82  | 1 | 0 | 0 | 0 | 0 |
| 81  | 83  | 1 | 0 | 0 | 0 | 0 |
| 81  | 85  | 1 | 0 | 0 | 0 | 0 |
| 85  | 86  | 1 | 0 | 0 | 0 | 0 |
| 85  | 87  | 1 | 0 | 0 | 0 | 0 |
| 88  | 89  | 1 | 0 | 0 | 0 | 0 |
| 88  | 90  | 1 | 0 | 0 | 0 | 0 |
| 90  | 91  | 1 | 0 | 0 | 0 | 0 |
| 90  | 92  | 1 | 0 | 0 | 0 | 0 |
| 90  | 93  | 1 | 0 | 0 | 0 | 0 |
| 93  | 94  | 1 | 0 | 0 | 0 | 0 |
| 93  | 95  | 1 | 0 | 0 | 0 | 0 |
| 93  | 100 | 1 | 0 | 0 | 0 | 0 |
| 95  | 96  | 1 | 0 | 0 | 0 | 0 |
| 95  | 97  | 1 | 0 | 0 | 0 | 0 |
| 95  | 98  | 1 | 0 | 0 | 0 | 0 |
| 98  | 99  | 1 | 0 | 0 | 0 | 0 |
| 100 | 113 | 1 | 0 | 0 | 0 | 0 |
| 101 | 102 | 1 | 0 | 0 | 0 | 0 |
| 101 | 103 | 1 | 0 | 0 | 0 | 0 |
| 101 | 104 | 1 | 0 | 0 | 0 | 0 |
| 101 | 128 | 1 | 0 | 0 | 0 | 0 |
| 104 | 105 | 1 | 0 | 0 | 0 | 0 |
| 105 | 106 | 1 | 0 | 0 | 0 | 0 |
| 105 | 112 | 2 | 0 | 0 | 0 | 0 |
| 106 | 107 | 1 | 0 | 0 | 0 | 0 |
| 106 | 108 | 1 | 0 | 0 | 0 | 0 |
| 106 | 109 | 1 | 0 | 0 | 0 | 0 |
| 109 | 110 | 1 | 0 | 0 | 0 | 0 |
| 109 | 111 | 1 | 0 | 0 | 0 | 0 |
| 109 | 143 | 1 | 0 | 0 | 0 | 0 |
| 113 | 114 | 1 | 0 | 0 | 0 | 0 |
| 113 | 115 | 1 | 0 | 0 | 0 | 0 |
| 113 | 116 | 1 | 0 | 0 | 0 | 0 |

|        |   |   |   |   |   |
|--------|---|---|---|---|---|
| 116117 | 1 | 0 | 0 | 0 | 0 |
| 116118 | 1 | 0 | 0 | 0 | 0 |
| 116119 | 1 | 0 | 0 | 0 | 0 |
| 119120 | 1 | 0 | 0 | 0 | 0 |
| 119127 | 2 | 0 | 0 | 0 | 0 |
| 120121 | 1 | 0 | 0 | 0 | 0 |
| 121122 | 1 | 0 | 0 | 0 | 0 |
| 121123 | 1 | 0 | 0 | 0 | 0 |
| 121124 | 1 | 0 | 0 | 0 | 0 |
| 124125 | 1 | 0 | 0 | 0 | 0 |
| 124126 | 1 | 0 | 0 | 0 | 0 |
| 124128 | 1 | 0 | 0 | 0 | 0 |
| 128129 | 1 | 0 | 0 | 0 | 0 |
| 128130 | 1 | 0 | 0 | 0 | 0 |
| 131132 | 1 | 0 | 0 | 0 | 0 |
| 131133 | 1 | 0 | 0 | 0 | 0 |
| 133134 | 1 | 0 | 0 | 0 | 0 |
| 133135 | 1 | 0 | 0 | 0 | 0 |
| 133136 | 1 | 0 | 0 | 0 | 0 |
| 136137 | 1 | 0 | 0 | 0 | 0 |
| 136138 | 1 | 0 | 0 | 0 | 0 |
| 136143 | 1 | 0 | 0 | 0 | 0 |
| 138139 | 1 | 0 | 0 | 0 | 0 |
| 138140 | 1 | 0 | 0 | 0 | 0 |
| 138141 | 1 | 0 | 0 | 0 | 0 |
| 141142 | 1 | 0 | 0 | 0 | 0 |
| 143156 | 1 | 0 | 0 | 0 | 0 |
| 144145 | 1 | 0 | 0 | 0 | 0 |
| 144146 | 1 | 0 | 0 | 0 | 0 |
| 144147 | 1 | 0 | 0 | 0 | 0 |
| 144171 | 1 | 0 | 0 | 0 | 0 |
| 147148 | 1 | 0 | 0 | 0 | 0 |
| 148149 | 1 | 0 | 0 | 0 | 0 |
| 148155 | 2 | 0 | 0 | 0 | 0 |
| 149150 | 1 | 0 | 0 | 0 | 0 |
| 149151 | 1 | 0 | 0 | 0 | 0 |
| 149152 | 1 | 0 | 0 | 0 | 0 |
| 152153 | 1 | 0 | 0 | 0 | 0 |
| 152154 | 1 | 0 | 0 | 0 | 0 |
| 152186 | 1 | 0 | 0 | 0 | 0 |
| 156157 | 1 | 0 | 0 | 0 | 0 |
| 156158 | 1 | 0 | 0 | 0 | 0 |
| 156159 | 1 | 0 | 0 | 0 | 0 |
| 159160 | 1 | 0 | 0 | 0 | 0 |
| 159161 | 1 | 0 | 0 | 0 | 0 |
| 159162 | 1 | 0 | 0 | 0 | 0 |
| 162163 | 1 | 0 | 0 | 0 | 0 |
| 162170 | 2 | 0 | 0 | 0 | 0 |
| 163164 | 1 | 0 | 0 | 0 | 0 |
| 164165 | 1 | 0 | 0 | 0 | 0 |
| 164166 | 1 | 0 | 0 | 0 | 0 |
| 164167 | 1 | 0 | 0 | 0 | 0 |
| 167168 | 1 | 0 | 0 | 0 | 0 |
| 167169 | 1 | 0 | 0 | 0 | 0 |
| 167171 | 1 | 0 | 0 | 0 | 0 |
| 171172 | 1 | 0 | 0 | 0 | 0 |
| 171173 | 1 | 0 | 0 | 0 | 0 |
| 174175 | 1 | 0 | 0 | 0 | 0 |
| 174176 | 1 | 0 | 0 | 0 | 0 |
| 176177 | 1 | 0 | 0 | 0 | 0 |
| 176178 | 1 | 0 | 0 | 0 | 0 |
| 176179 | 1 | 0 | 0 | 0 | 0 |
| 179180 | 1 | 0 | 0 | 0 | 0 |
| 179181 | 1 | 0 | 0 | 0 | 0 |
| 179186 | 1 | 0 | 0 | 0 | 0 |
| 181182 | 1 | 0 | 0 | 0 | 0 |
| 181183 | 1 | 0 | 0 | 0 | 0 |
| 181184 | 1 | 0 | 0 | 0 | 0 |
| 184185 | 1 | 0 | 0 | 0 | 0 |
| 186199 | 1 | 0 | 0 | 0 | 0 |
| 187188 | 1 | 0 | 0 | 0 | 0 |
| 187189 | 1 | 0 | 0 | 0 | 0 |
| 187190 | 1 | 0 | 0 | 0 | 0 |
| 187214 | 1 | 0 | 0 | 0 | 0 |
| 190191 | 1 | 0 | 0 | 0 | 0 |
| 191192 | 1 | 0 | 0 | 0 | 0 |
| 191198 | 2 | 0 | 0 | 0 | 0 |
| 192193 | 1 | 0 | 0 | 0 | 0 |
| 192194 | 1 | 0 | 0 | 0 | 0 |
| 192195 | 1 | 0 | 0 | 0 | 0 |
| 195196 | 1 | 0 | 0 | 0 | 0 |









|         |          |         |   |   |   |   |   |   |   |   |   |   |   |   |   |   |   |   |   |
|---------|----------|---------|---|---|---|---|---|---|---|---|---|---|---|---|---|---|---|---|---|
| 65.1810 | -14.9170 | 8.4430  | H | 0 | 0 | 0 | 0 | 0 | 0 | 0 | 0 | 0 | 0 | 0 | 0 | 0 | 0 | 0 | 0 |
| 66.5840 | -13.8200 | 8.3070  | H | 0 | 0 | 0 | 0 | 0 | 0 | 0 | 0 | 0 | 0 | 0 | 0 | 0 | 0 | 0 | 0 |
| 65.6950 | -13.9160 | 10.2900 | C | 0 | 0 | 0 | 0 | 0 | 0 | 0 | 0 | 0 | 0 | 0 | 0 | 0 | 0 | 0 | 0 |
| 66.0550 | -12.9380 | 10.6340 | H | 0 | 0 | 0 | 0 | 0 | 0 | 0 | 0 | 0 | 0 | 0 | 0 | 0 | 0 | 0 | 0 |
| 64.6890 | -14.0270 | 10.7130 | H | 0 | 0 | 0 | 0 | 0 | 0 | 0 | 0 | 0 | 0 | 0 | 0 | 0 | 0 | 0 | 0 |
| 64.1700 | -12.0010 | 8.9420  | O | 0 | 0 | 0 | 0 | 0 | 0 | 0 | 0 | 0 | 0 | 0 | 0 | 0 | 0 | 0 | 0 |
| 60.7260 | -9.6360  | -1.4070 | C | 0 | 0 | 0 | 0 | 0 | 0 | 0 | 0 | 0 | 0 | 0 | 0 | 0 | 0 | 0 | 0 |
| 60.4230 | -10.6700 | -1.6160 | H | 0 | 0 | 0 | 0 | 0 | 0 | 0 | 0 | 0 | 0 | 0 | 0 | 0 | 0 | 0 | 0 |
| 61.6780 | -9.5170  | -1.9440 | H | 0 | 0 | 0 | 0 | 0 | 0 | 0 | 0 | 0 | 0 | 0 | 0 | 0 | 0 | 0 | 0 |
| 61.0050 | -9.4590  | 0.0890  | C | 0 | 0 | 0 | 0 | 0 | 0 | 0 | 0 | 0 | 0 | 0 | 0 | 0 | 0 | 0 | 0 |
| 61.5070 | -8.5040  | 0.2790  | H | 0 | 0 | 0 | 0 | 0 | 0 | 0 | 0 | 0 | 0 | 0 | 0 | 0 | 0 | 0 | 0 |
| 60.0780 | -9.4960  | 0.6660  | H | 0 | 0 | 0 | 0 | 0 | 0 | 0 | 0 | 0 | 0 | 0 | 0 | 0 | 0 | 0 | 0 |
| 61.9080 | -10.5500 | 0.5980  | C | 0 | 0 | 0 | 0 | 0 | 0 | 0 | 0 | 0 | 0 | 0 | 0 | 0 | 0 | 0 | 0 |
| 62.0280 | -10.4430 | 1.9520  | O | 0 | 0 | 0 | 0 | 0 | 0 | 0 | 0 | 0 | 0 | 0 | 0 | 0 | 0 | 0 | 0 |
| 62.8650 | -11.4390 | 2.5550  | C | 0 | 0 | 0 | 0 | 0 | 0 | 0 | 0 | 0 | 0 | 0 | 0 | 0 | 0 | 0 | 0 |
| 62.4580 | -12.4350 | 2.3450  | H | 0 | 0 | 0 | 0 | 0 | 0 | 0 | 0 | 0 | 0 | 0 | 0 | 0 | 0 | 0 | 0 |
| 63.8790 | -11.3620 | 2.1450  | H | 0 | 0 | 0 | 0 | 0 | 0 | 0 | 0 | 0 | 0 | 0 | 0 | 0 | 0 | 0 | 0 |
| 62.8870 | -11.1870 | 4.0580  | C | 0 | 0 | 0 | 0 | 0 | 0 | 0 | 0 | 0 | 0 | 0 | 0 | 0 | 0 | 0 | 0 |
| 63.2530 | -10.1710 | 4.2510  | H | 0 | 0 | 0 | 0 | 0 | 0 | 0 | 0 | 0 | 0 | 0 | 0 | 0 | 0 | 0 | 0 |
| 61.8600 | -11.2140 | 4.4450  | H | 0 | 0 | 0 | 0 | 0 | 0 | 0 | 0 | 0 | 0 | 0 | 0 | 0 | 0 | 0 | 0 |
| 62.4530 | -11.3980 | -0.0930 | O | 0 | 0 | 0 | 0 | 0 | 0 | 0 | 0 | 0 | 0 | 0 | 0 | 0 | 0 | 0 | 0 |
| 63.7530 | -12.2080 | 4.7880  | C | 0 | 0 | 0 | 0 | 0 | 0 | 0 | 0 | 0 | 0 | 0 | 0 | 0 | 0 | 0 | 0 |
| 64.7790 | -12.1810 | 4.4010  | H | 0 | 0 | 0 | 0 | 0 | 0 | 0 | 0 | 0 | 0 | 0 | 0 | 0 | 0 | 0 | 0 |
| 63.3860 | -13.2240 | 4.5950  | H | 0 | 0 | 0 | 0 | 0 | 0 | 0 | 0 | 0 | 0 | 0 | 0 | 0 | 0 | 0 | 0 |
| 72.4450 | -16.5730 | 11.3330 | O | 0 | 0 | 0 | 0 | 0 | 0 | 0 | 0 | 0 | 0 | 0 | 0 | 0 | 0 | 0 | 0 |
| 72.9550 | -17.2970 | 11.7360 | H | 0 | 0 | 0 | 0 | 0 | 0 | 0 | 0 | 0 | 0 | 0 | 0 | 0 | 0 | 0 | 0 |
| 71.0760 | -16.8170 | 11.6200 | C | 0 | 0 | 0 | 0 | 0 | 0 | 0 | 0 | 0 | 0 | 0 | 0 | 0 | 0 | 0 | 0 |
| 70.7970 | -17.7860 | 11.1930 | H | 0 | 0 | 0 | 0 | 0 | 0 | 0 | 0 | 0 | 0 | 0 | 0 | 0 | 0 | 0 | 0 |
| 70.9470 | -16.8550 | 12.7070 | H | 0 | 0 | 0 | 0 | 0 | 0 | 0 | 0 | 0 | 0 | 0 | 0 | 0 | 0 | 0 | 0 |
| 70.2510 | -15.6950 | 11.0130 | C | 0 | 0 | 0 | 0 | 0 | 0 | 0 | 0 | 0 | 0 | 0 | 0 | 0 | 0 | 0 | 0 |
| 70.5810 | -14.7350 | 11.4280 | H | 0 | 0 | 0 | 0 | 0 | 0 | 0 | 0 | 0 | 0 | 0 | 0 | 0 | 0 | 0 | 0 |
| 70.4540 | -15.6400 | 9.9360  | H | 0 | 0 | 0 | 0 | 0 | 0 | 0 | 0 | 0 | 0 | 0 | 0 | 0 | 0 | 0 | 0 |
| 68.7580 | -15.8950 | 11.2600 | C | 0 | 0 | 0 | 0 | 0 | 0 | 0 | 0 | 0 | 0 | 0 | 0 | 0 | 0 | 0 | 0 |
| 68.4450 | -16.8600 | 10.8430 | H | 0 | 0 | 0 | 0 | 0 | 0 | 0 | 0 | 0 | 0 | 0 | 0 | 0 | 0 | 0 | 0 |
| 68.5640 | -15.9280 | 12.3390 | H | 0 | 0 | 0 | 0 | 0 | 0 | 0 | 0 | 0 | 0 | 0 | 0 | 0 | 0 | 0 | 0 |
| 67.9520 | -14.7650 | 10.6200 | C | 0 | 0 | 0 | 0 | 0 | 0 | 0 | 0 | 0 | 0 | 0 | 0 | 0 | 0 | 0 | 0 |
| 68.2570 | -13.8080 | 11.0600 | H | 0 | 0 | 0 | 0 | 0 | 0 | 0 | 0 | 0 | 0 | 0 | 0 | 0 | 0 | 0 | 0 |
| 68.1770 | -14.7330 | 9.5480  | H | 0 | 0 | 0 | 0 | 0 | 0 | 0 | 0 | 0 | 0 | 0 | 0 | 0 | 0 | 0 | 0 |
| 66.5260 | -14.9860 | 10.8460 | N | 0 | 0 | 3 | 0 | 0 | 0 | 0 | 0 | 0 | 0 | 0 | 0 | 0 | 0 | 0 | 0 |
| 66.2450 | -15.8870 | 10.4600 | H | 0 | 0 | 0 | 0 | 0 | 0 | 0 | 0 | 0 | 0 | 0 | 0 | 0 | 0 | 0 | 0 |
| 1       | 2        | 1       | 0 | 0 | 0 | 0 |   |   |   |   |   |   |   |   |   |   |   |   |   |
| 1       | 3        | 1       | 0 | 0 | 0 | 0 |   |   |   |   |   |   |   |   |   |   |   |   |   |
| 3       | 4        | 1       | 0 | 0 | 0 | 0 |   |   |   |   |   |   |   |   |   |   |   |   |   |
| 3       | 5        | 1       | 0 | 0 | 0 | 0 |   |   |   |   |   |   |   |   |   |   |   |   |   |
| 3       | 6        | 1       | 0 | 0 | 0 | 0 |   |   |   |   |   |   |   |   |   |   |   |   |   |
| 6       | 7        | 1       | 0 | 0 | 0 | 0 |   |   |   |   |   |   |   |   |   |   |   |   |   |
| 6       | 8        | 1       | 0 | 0 | 0 | 0 |   |   |   |   |   |   |   |   |   |   |   |   |   |
| 6       | 9        | 1       | 0 | 0 | 0 | 0 |   |   |   |   |   |   |   |   |   |   |   |   |   |
| 9       | 10       | 1       | 0 | 0 | 0 | 0 |   |   |   |   |   |   |   |   |   |   |   |   |   |
| 9       | 11       | 1       | 0 | 0 | 0 | 0 |   |   |   |   |   |   |   |   |   |   |   |   |   |
| 9       | 12       | 1       | 0 | 0 | 0 | 0 |   |   |   |   |   |   |   |   |   |   |   |   |   |
| 12      | 13       | 1       | 0 | 0 | 0 | 0 |   |   |   |   |   |   |   |   |   |   |   |   |   |
| 12      | 14       | 1       | 0 | 0 | 0 | 0 |   |   |   |   |   |   |   |   |   |   |   |   |   |
| 12      | 15       | 1       | 0 | 0 | 0 | 0 |   |   |   |   |   |   |   |   |   |   |   |   |   |
| 15      | 16       | 1       | 0 | 0 | 0 | 0 |   |   |   |   |   |   |   |   |   |   |   |   |   |
| 15      | 29       | 1       | 0 | 0 | 0 | 0 |   |   |   |   |   |   |   |   |   |   |   |   |   |
| 17      | 18       | 1       | 0 | 0 | 0 | 0 |   |   |   |   |   |   |   |   |   |   |   |   |   |
| 17      | 19       | 1       | 0 | 0 | 0 | 0 |   |   |   |   |   |   |   |   |   |   |   |   |   |
| 17      | 20       | 1       | 0 | 0 | 0 | 0 |   |   |   |   |   |   |   |   |   |   |   |   |   |
| 17      | 44       | 1       | 0 | 0 | 0 | 0 |   |   |   |   |   |   |   |   |   |   |   |   |   |
| 20      | 21       | 1       | 0 | 0 | 0 | 0 |   |   |   |   |   |   |   |   |   |   |   |   |   |
| 21      | 22       | 1       | 0 | 0 | 0 | 0 |   |   |   |   |   |   |   |   |   |   |   |   |   |
| 21      | 28       | 2       | 0 | 0 | 0 | 0 |   |   |   |   |   |   |   |   |   |   |   |   |   |
| 22      | 23       | 1       | 0 | 0 | 0 | 0 |   |   |   |   |   |   |   |   |   |   |   |   |   |
| 22      | 24       | 1       | 0 | 0 | 0 | 0 |   |   |   |   |   |   |   |   |   |   |   |   |   |
| 22      | 25       | 1       | 0 | 0 | 0 | 0 |   |   |   |   |   |   |   |   |   |   |   |   |   |
| 25      | 26       | 1       | 0 | 0 | 0 | 0 |   |   |   |   |   |   |   |   |   |   |   |   |   |
| 25      | 27       | 1       | 0 | 0 | 0 | 0 |   |   |   |   |   |   |   |   |   |   |   |   |   |
| 25      | 61       | 1       | 0 | 0 | 0 | 0 |   |   |   |   |   |   |   |   |   |   |   |   |   |
| 29      | 30       | 1       | 0 | 0 | 0 | 0 |   |   |   |   |   |   |   |   |   |   |   |   |   |
| 29      | 31       | 1       | 0 | 0 | 0 | 0 |   |   |   |   |   |   |   |   |   |   |   |   |   |
| 29      | 32       | 1       | 0 | 0 | 0 | 0 |   |   |   |   |   |   |   |   |   |   |   |   |   |
| 32      | 33       | 1       | 0 | 0 | 0 | 0 |   |   |   |   |   |   |   |   |   |   |   |   |   |
| 32      | 34       | 1       | 0 | 0 | 0 | 0 |   |   |   |   |   |   |   |   |   |   |   |   |   |
| 32      | 35       | 1       | 0 | 0 | 0 | 0 |   |   |   |   |   |   |   |   |   |   |   |   |   |
| 35      | 36       | 1       | 0 | 0 | 0 | 0 |   |   |   |   |   |   |   |   |   |   |   |   |   |
| 35      | 43       | 2       | 0 | 0 | 0 | 0 |   |   |   |   |   |   |   |   |   |   |   |   |   |
| 36      | 37       | 1       | 0 | 0 | 0 | 0 |   |   |   |   |   |   |   |   |   |   |   |   |   |
| 37      | 38       | 1       | 0 | 0 | 0 | 0 |   |   |   |   |   |   |   |   |   |   |   |   |   |
| 37      | 39       | 1       | 0 | 0 | 0 | 0 |   |   |   |   |   |   |   |   |   |   |   |   |   |
| 37      | 40       | 1       | 0 | 0 | 0 | 0 |   |   |   |   |   |   |   |   |   |   |   |   |   |

|     |     |   |   |   |   |   |
|-----|-----|---|---|---|---|---|
| 40  | 41  | 1 | 0 | 0 | 0 | 0 |
| 40  | 42  | 1 | 0 | 0 | 0 | 0 |
| 40  | 44  | 1 | 0 | 0 | 0 | 0 |
| 44  | 45  | 1 | 0 | 0 | 0 | 0 |
| 44  | 46  | 1 | 0 | 0 | 0 | 0 |
| 47  | 48  | 1 | 0 | 0 | 0 | 0 |
| 47  | 49  | 1 | 0 | 0 | 0 | 0 |
| 49  | 50  | 1 | 0 | 0 | 0 | 0 |
| 49  | 51  | 1 | 0 | 0 | 0 | 0 |
| 49  | 52  | 1 | 0 | 0 | 0 | 0 |
| 52  | 53  | 1 | 0 | 0 | 0 | 0 |
| 52  | 54  | 1 | 0 | 0 | 0 | 0 |
| 52  | 55  | 1 | 0 | 0 | 0 | 0 |
| 55  | 56  | 1 | 0 | 0 | 0 | 0 |
| 55  | 57  | 1 | 0 | 0 | 0 | 0 |
| 55  | 58  | 1 | 0 | 0 | 0 | 0 |
| 58  | 59  | 1 | 0 | 0 | 0 | 0 |
| 58  | 60  | 1 | 0 | 0 | 0 | 0 |
| 58  | 61  | 1 | 0 | 0 | 0 | 0 |
| 61  | 74  | 1 | 0 | 0 | 0 | 0 |
| 62  | 63  | 1 | 0 | 0 | 0 | 0 |
| 62  | 64  | 1 | 0 | 0 | 0 | 0 |
| 62  | 65  | 1 | 0 | 0 | 0 | 0 |
| 62  | 89  | 1 | 0 | 0 | 0 | 0 |
| 65  | 66  | 1 | 0 | 0 | 0 | 0 |
| 66  | 67  | 1 | 0 | 0 | 0 | 0 |
| 66  | 73  | 2 | 0 | 0 | 0 | 0 |
| 67  | 68  | 1 | 0 | 0 | 0 | 0 |
| 67  | 69  | 1 | 0 | 0 | 0 | 0 |
| 67  | 70  | 1 | 0 | 0 | 0 | 0 |
| 70  | 71  | 1 | 0 | 0 | 0 | 0 |
| 70  | 72  | 1 | 0 | 0 | 0 | 0 |
| 70  | 106 | 1 | 0 | 0 | 0 | 0 |
| 74  | 75  | 1 | 0 | 0 | 0 | 0 |
| 74  | 76  | 1 | 0 | 0 | 0 | 0 |
| 74  | 77  | 1 | 0 | 0 | 0 | 0 |
| 77  | 78  | 1 | 0 | 0 | 0 | 0 |
| 77  | 79  | 1 | 0 | 0 | 0 | 0 |
| 77  | 80  | 1 | 0 | 0 | 0 | 0 |
| 80  | 81  | 1 | 0 | 0 | 0 | 0 |
| 80  | 88  | 2 | 0 | 0 | 0 | 0 |
| 81  | 82  | 1 | 0 | 0 | 0 | 0 |
| 82  | 83  | 1 | 0 | 0 | 0 | 0 |
| 82  | 84  | 1 | 0 | 0 | 0 | 0 |
| 82  | 85  | 1 | 0 | 0 | 0 | 0 |
| 85  | 86  | 1 | 0 | 0 | 0 | 0 |
| 85  | 87  | 1 | 0 | 0 | 0 | 0 |
| 85  | 89  | 1 | 0 | 0 | 0 | 0 |
| 89  | 90  | 1 | 0 | 0 | 0 | 0 |
| 89  | 91  | 1 | 0 | 0 | 0 | 0 |
| 92  | 93  | 1 | 0 | 0 | 0 | 0 |
| 92  | 94  | 1 | 0 | 0 | 0 | 0 |
| 94  | 95  | 1 | 0 | 0 | 0 | 0 |
| 94  | 96  | 1 | 0 | 0 | 0 | 0 |
| 94  | 97  | 1 | 0 | 0 | 0 | 0 |
| 97  | 98  | 1 | 0 | 0 | 0 | 0 |
| 97  | 99  | 1 | 0 | 0 | 0 | 0 |
| 97  | 100 | 1 | 0 | 0 | 0 | 0 |
| 100 | 101 | 1 | 0 | 0 | 0 | 0 |
| 100 | 102 | 1 | 0 | 0 | 0 | 0 |
| 100 | 103 | 1 | 0 | 0 | 0 | 0 |
| 103 | 104 | 1 | 0 | 0 | 0 | 0 |
| 103 | 105 | 1 | 0 | 0 | 0 | 0 |
| 103 | 106 | 1 | 0 | 0 | 0 | 0 |
| 106 | 119 | 1 | 0 | 0 | 0 | 0 |
| 107 | 108 | 1 | 0 | 0 | 0 | 0 |
| 107 | 109 | 1 | 0 | 0 | 0 | 0 |
| 107 | 110 | 1 | 0 | 0 | 0 | 0 |
| 107 | 134 | 1 | 0 | 0 | 0 | 0 |
| 110 | 111 | 1 | 0 | 0 | 0 | 0 |
| 111 | 112 | 1 | 0 | 0 | 0 | 0 |
| 111 | 118 | 2 | 0 | 0 | 0 | 0 |
| 112 | 113 | 1 | 0 | 0 | 0 | 0 |
| 112 | 114 | 1 | 0 | 0 | 0 | 0 |
| 112 | 115 | 1 | 0 | 0 | 0 | 0 |
| 115 | 116 | 1 | 0 | 0 | 0 | 0 |
| 115 | 117 | 1 | 0 | 0 | 0 | 0 |
| 115 | 151 | 1 | 0 | 0 | 0 | 0 |
| 119 | 120 | 1 | 0 | 0 | 0 | 0 |
| 119 | 121 | 1 | 0 | 0 | 0 | 0 |
| 119 | 122 | 1 | 0 | 0 | 0 | 0 |

|        |   |   |   |   |   |
|--------|---|---|---|---|---|
| 122123 | 1 | 0 | 0 | 0 | 0 |
| 122124 | 1 | 0 | 0 | 0 | 0 |
| 122125 | 1 | 0 | 0 | 0 | 0 |
| 125126 | 1 | 0 | 0 | 0 | 0 |
| 125133 | 2 | 0 | 0 | 0 | 0 |
| 126127 | 1 | 0 | 0 | 0 | 0 |
| 127128 | 1 | 0 | 0 | 0 | 0 |
| 127129 | 1 | 0 | 0 | 0 | 0 |
| 127130 | 1 | 0 | 0 | 0 | 0 |
| 130131 | 1 | 0 | 0 | 0 | 0 |
| 130132 | 1 | 0 | 0 | 0 | 0 |
| 130134 | 1 | 0 | 0 | 0 | 0 |
| 134135 | 1 | 0 | 0 | 0 | 0 |
| 134136 | 1 | 0 | 0 | 0 | 0 |
| 137138 | 1 | 0 | 0 | 0 | 0 |
| 137139 | 1 | 0 | 0 | 0 | 0 |
| 139140 | 1 | 0 | 0 | 0 | 0 |
| 139141 | 1 | 0 | 0 | 0 | 0 |
| 139142 | 1 | 0 | 0 | 0 | 0 |
| 142143 | 1 | 0 | 0 | 0 | 0 |
| 142144 | 1 | 0 | 0 | 0 | 0 |
| 142145 | 1 | 0 | 0 | 0 | 0 |
| 145146 | 1 | 0 | 0 | 0 | 0 |
| 145147 | 1 | 0 | 0 | 0 | 0 |
| 145148 | 1 | 0 | 0 | 0 | 0 |
| 148149 | 1 | 0 | 0 | 0 | 0 |
| 148150 | 1 | 0 | 0 | 0 | 0 |
| 148151 | 1 | 0 | 0 | 0 | 0 |
| 151164 | 1 | 0 | 0 | 0 | 0 |
| 152153 | 1 | 0 | 0 | 0 | 0 |
| 152154 | 1 | 0 | 0 | 0 | 0 |
| 152155 | 1 | 0 | 0 | 0 | 0 |
| 152179 | 1 | 0 | 0 | 0 | 0 |
| 155156 | 1 | 0 | 0 | 0 | 0 |
| 156157 | 1 | 0 | 0 | 0 | 0 |
| 156163 | 2 | 0 | 0 | 0 | 0 |
| 157158 | 1 | 0 | 0 | 0 | 0 |
| 157159 | 1 | 0 | 0 | 0 | 0 |
| 157160 | 1 | 0 | 0 | 0 | 0 |
| 160161 | 1 | 0 | 0 | 0 | 0 |
| 160162 | 1 | 0 | 0 | 0 | 0 |
| 160196 | 1 | 0 | 0 | 0 | 0 |
| 164165 | 1 | 0 | 0 | 0 | 0 |
| 164166 | 1 | 0 | 0 | 0 | 0 |
| 164167 | 1 | 0 | 0 | 0 | 0 |
| 167168 | 1 | 0 | 0 | 0 | 0 |
| 167169 | 1 | 0 | 0 | 0 | 0 |
| 167170 | 1 | 0 | 0 | 0 | 0 |
| 170171 | 1 | 0 | 0 | 0 | 0 |
| 170178 | 2 | 0 | 0 | 0 | 0 |
| 171172 | 1 | 0 | 0 | 0 | 0 |
| 172173 | 1 | 0 | 0 | 0 | 0 |
| 172174 | 1 | 0 | 0 | 0 | 0 |
| 172175 | 1 | 0 | 0 | 0 | 0 |
| 175176 | 1 | 0 | 0 | 0 | 0 |
| 175177 | 1 | 0 | 0 | 0 | 0 |
| 175179 | 1 | 0 | 0 | 0 | 0 |
| 179180 | 1 | 0 | 0 | 0 | 0 |
| 179181 | 1 | 0 | 0 | 0 | 0 |
| 182183 | 1 | 0 | 0 | 0 | 0 |
| 182184 | 1 | 0 | 0 | 0 | 0 |
| 184185 | 1 | 0 | 0 | 0 | 0 |
| 184186 | 1 | 0 | 0 | 0 | 0 |
| 184187 | 1 | 0 | 0 | 0 | 0 |
| 187188 | 1 | 0 | 0 | 0 | 0 |
| 187189 | 1 | 0 | 0 | 0 | 0 |
| 187190 | 1 | 0 | 0 | 0 | 0 |
| 190191 | 1 | 0 | 0 | 0 | 0 |
| 190192 | 1 | 0 | 0 | 0 | 0 |
| 190193 | 1 | 0 | 0 | 0 | 0 |
| 193194 | 1 | 0 | 0 | 0 | 0 |
| 193195 | 1 | 0 | 0 | 0 | 0 |
| 193196 | 1 | 0 | 0 | 0 | 0 |
| 196209 | 1 | 0 | 0 | 0 | 0 |
| 197198 | 1 | 0 | 0 | 0 | 0 |
| 197199 | 1 | 0 | 0 | 0 | 0 |
| 197200 | 1 | 0 | 0 | 0 | 0 |
| 197224 | 1 | 0 | 0 | 0 | 0 |
| 200201 | 1 | 0 | 0 | 0 | 0 |
| 201202 | 1 | 0 | 0 | 0 | 0 |
| 201208 | 2 | 0 | 0 | 0 | 0 |

```

202203 1 0 0 0 0
202204 1 0 0 0 0
202205 1 0 0 0 0
205206 1 0 0 0 0
205207 1 0 0 0 0
205241 1 0 0 0 0
209210 1 0 0 0 0
209211 1 0 0 0 0
209212 1 0 0 0 0
212213 1 0 0 0 0
212214 1 0 0 0 0
212215 1 0 0 0 0
215216 1 0 0 0 0
215223 2 0 0 0 0
216217 1 0 0 0 0
217218 1 0 0 0 0
217219 1 0 0 0 0
217220 1 0 0 0 0
220221 1 0 0 0 0
220222 1 0 0 0 0
220224 1 0 0 0 0
224225 1 0 0 0 0
224226 1 0 0 0 0
227228 1 0 0 0 0
227229 1 0 0 0 0
229230 1 0 0 0 0
229231 1 0 0 0 0
229232 1 0 0 0 0
232233 1 0 0 0 0
232234 1 0 0 0 0
232235 1 0 0 0 0
235236 1 0 0 0 0
235237 1 0 0 0 0
235238 1 0 0 0 0
238239 1 0 0 0 0
238240 1 0 0 0 0
238241 1 0 0 0 0
241242 1 0 0 0 0

```

```

M END
> <NAME>
C28_12

```

```

$$$$
C32_12
MOE2012 3D

```

```

260259 0 0 1 0 0 0 0 0999 V2000
42.1300 -27.1300 -11.5470 O 0 0 0 0 0 0 0 0 0 0 0 0 0 0 0 0
42.9290 -26.8190 -12.0050 H 0 0 0 0 0 0 0 0 0 0 0 0 0 0 0 0
41.5220 -25.9930 -10.9500 C 0 0 0 0 0 0 0 0 0 0 0 0 0 0 0 0
42.2350 -25.5430 -10.2520 H 0 0 0 0 0 0 0 0 0 0 0 0 0 0 0 0
41.2870 -25.2700 -11.7370 H 0 0 0 0 0 0 0 0 0 0 0 0 0 0 0 0
40.2590 -26.4380 -10.2260 C 0 0 0 0 0 0 0 0 0 0 0 0 0 0 0 0
39.5870 -26.9320 -10.9390 H 0 0 0 0 0 0 0 0 0 0 0 0 0 0 0 0
40.5180 -27.2020 -9.4810 H 0 0 0 0 0 0 0 0 0 0 0 0 0 0 0 0
39.5470 -25.2660 -9.5540 C 0 0 0 0 0 0 0 0 0 0 0 0 0 0 0 0
40.2240 -24.7860 -8.8370 H 0 0 0 0 0 0 0 0 0 0 0 0 0 0 0 0
39.2870 -24.5130 -10.3080 H 0 0 0 0 0 0 0 0 0 0 0 0 0 0 0 0
38.2790 -25.7270 -8.8320 C 0 0 0 0 0 0 0 0 0 0 0 0 0 0 0 0
37.6030 -26.2060 -9.5510 H 0 0 0 0 0 0 0 0 0 0 0 0 0 0 0 0
38.5430 -26.4860 -8.0830 H 0 0 0 0 0 0 0 0 0 0 0 0 0 0 0 0
37.5660 -24.5540 -8.1530 C 0 0 0 0 0 0 0 0 0 0 0 0 0 0 0 0
38.2430 -24.0890 -7.4270 H 0 0 0 0 0 0 0 0 0 0 0 0 0 0 0 0
37.3100 -23.8070 -8.9110 H 0 0 0 0 0 0 0 0 0 0 0 0 0 0 0 0
36.3570 -25.0390 -7.4830 N 0 0 3 0 0 0 0 0 0 0 0 0 0 0 0 0
36.6140 -25.7980 -6.8500 H 0 0 0 0 0 0 0 0 0 0 0 0 0 0 0 0
30.3950 -17.3990 -8.3010 C 0 0 0 0 0 0 0 0 0 0 0 0 0 0 0 0
29.7250 -18.0190 -8.9080 H 0 0 0 0 0 0 0 0 0 0 0 0 0 0 0 0
31.1290 -16.9070 -8.9500 H 0 0 0 0 0 0 0 0 0 0 0 0 0 0 0 0
29.6290 -16.4060 -7.6070 O 0 0 0 0 0 0 0 0 0 0 0 0 0 0 0 0
28.9530 -15.5440 -8.4180 C 0 0 0 0 0 0 0 0 0 0 0 0 0 0 0 0
28.2190 -14.5350 -7.5710 C 0 0 0 0 0 0 0 0 0 0 0 0 0 0 0 0
27.5340 -15.0730 -6.9060 H 0 0 0 0 0 0 0 0 0 0 0 0 0 0 0 0
28.9730 -14.0130 -6.9730 H 0 0 0 0 0 0 0 0 0 0 0 0 0 0 0 0
27.4360 -13.5520 -8.4450 C 0 0 0 0 0 0 0 0 0 0 0 0 0 0 0 0
28.1190 -13.0400 -9.1360 H 0 0 0 0 0 0 0 0 0 0 0 0 0 0 0 0
26.7580 -14.1440 -9.0750 H 0 0 0 0 0 0 0 0 0 0 0 0 0 0 0 0
28.9560 -15.5750 -9.6400 O 0 0 0 0 0 0 0 0 0 0 0 0 0 0 0 0
35.6780 -23.9960 -6.7080 C 0 0 0 0 0 0 0 0 0 0 0 0 0 0 0 0
34.9320 -24.4930 -6.0750 H 0 0 0 0 0 0 0 0 0 0 0 0 0 0 0 0
36.3800 -23.5070 -6.0210 H 0 0 0 0 0 0 0 0 0 0 0 0 0 0 0 0

```









|    |     |   |   |   |   |   |
|----|-----|---|---|---|---|---|
| 18 | 19  | 1 | 0 | 0 | 0 | 0 |
| 18 | 32  | 1 | 0 | 0 | 0 | 0 |
| 20 | 21  | 1 | 0 | 0 | 0 | 0 |
| 20 | 22  | 1 | 0 | 0 | 0 | 0 |
| 20 | 23  | 1 | 0 | 0 | 0 | 0 |
| 20 | 47  | 1 | 0 | 0 | 0 | 0 |
| 23 | 24  | 1 | 0 | 0 | 0 | 0 |
| 24 | 25  | 1 | 0 | 0 | 0 | 0 |
| 24 | 31  | 2 | 0 | 0 | 0 | 0 |
| 25 | 26  | 1 | 0 | 0 | 0 | 0 |
| 25 | 27  | 1 | 0 | 0 | 0 | 0 |
| 25 | 28  | 1 | 0 | 0 | 0 | 0 |
| 28 | 29  | 1 | 0 | 0 | 0 | 0 |
| 28 | 30  | 1 | 0 | 0 | 0 | 0 |
| 28 | 67  | 1 | 0 | 0 | 0 | 0 |
| 32 | 33  | 1 | 0 | 0 | 0 | 0 |
| 32 | 34  | 1 | 0 | 0 | 0 | 0 |
| 32 | 35  | 1 | 0 | 0 | 0 | 0 |
| 35 | 36  | 1 | 0 | 0 | 0 | 0 |
| 35 | 37  | 1 | 0 | 0 | 0 | 0 |
| 35 | 38  | 1 | 0 | 0 | 0 | 0 |
| 38 | 39  | 1 | 0 | 0 | 0 | 0 |
| 38 | 46  | 2 | 0 | 0 | 0 | 0 |
| 39 | 40  | 1 | 0 | 0 | 0 | 0 |
| 40 | 41  | 1 | 0 | 0 | 0 | 0 |
| 40 | 42  | 1 | 0 | 0 | 0 | 0 |
| 40 | 43  | 1 | 0 | 0 | 0 | 0 |
| 43 | 44  | 1 | 0 | 0 | 0 | 0 |
| 43 | 45  | 1 | 0 | 0 | 0 | 0 |
| 43 | 47  | 1 | 0 | 0 | 0 | 0 |
| 47 | 48  | 1 | 0 | 0 | 0 | 0 |
| 47 | 49  | 1 | 0 | 0 | 0 | 0 |
| 50 | 51  | 1 | 0 | 0 | 0 | 0 |
| 50 | 52  | 1 | 0 | 0 | 0 | 0 |
| 52 | 53  | 1 | 0 | 0 | 0 | 0 |
| 52 | 54  | 1 | 0 | 0 | 0 | 0 |
| 52 | 55  | 1 | 0 | 0 | 0 | 0 |
| 55 | 56  | 1 | 0 | 0 | 0 | 0 |
| 55 | 57  | 1 | 0 | 0 | 0 | 0 |
| 55 | 58  | 1 | 0 | 0 | 0 | 0 |
| 58 | 59  | 1 | 0 | 0 | 0 | 0 |
| 58 | 60  | 1 | 0 | 0 | 0 | 0 |
| 58 | 61  | 1 | 0 | 0 | 0 | 0 |
| 61 | 62  | 1 | 0 | 0 | 0 | 0 |
| 61 | 63  | 1 | 0 | 0 | 0 | 0 |
| 61 | 64  | 1 | 0 | 0 | 0 | 0 |
| 64 | 65  | 1 | 0 | 0 | 0 | 0 |
| 64 | 66  | 1 | 0 | 0 | 0 | 0 |
| 64 | 67  | 1 | 0 | 0 | 0 | 0 |
| 67 | 80  | 1 | 0 | 0 | 0 | 0 |
| 68 | 69  | 1 | 0 | 0 | 0 | 0 |
| 68 | 70  | 1 | 0 | 0 | 0 | 0 |
| 68 | 71  | 1 | 0 | 0 | 0 | 0 |
| 68 | 95  | 1 | 0 | 0 | 0 | 0 |
| 71 | 72  | 1 | 0 | 0 | 0 | 0 |
| 72 | 73  | 1 | 0 | 0 | 0 | 0 |
| 72 | 79  | 2 | 0 | 0 | 0 | 0 |
| 73 | 74  | 1 | 0 | 0 | 0 | 0 |
| 73 | 75  | 1 | 0 | 0 | 0 | 0 |
| 73 | 76  | 1 | 0 | 0 | 0 | 0 |
| 76 | 77  | 1 | 0 | 0 | 0 | 0 |
| 76 | 78  | 1 | 0 | 0 | 0 | 0 |
| 76 | 115 | 1 | 0 | 0 | 0 | 0 |
| 80 | 81  | 1 | 0 | 0 | 0 | 0 |
| 80 | 82  | 1 | 0 | 0 | 0 | 0 |
| 80 | 83  | 1 | 0 | 0 | 0 | 0 |
| 83 | 84  | 1 | 0 | 0 | 0 | 0 |
| 83 | 85  | 1 | 0 | 0 | 0 | 0 |
| 83 | 86  | 1 | 0 | 0 | 0 | 0 |
| 86 | 87  | 1 | 0 | 0 | 0 | 0 |
| 86 | 94  | 2 | 0 | 0 | 0 | 0 |
| 87 | 88  | 1 | 0 | 0 | 0 | 0 |
| 88 | 89  | 1 | 0 | 0 | 0 | 0 |
| 88 | 90  | 1 | 0 | 0 | 0 | 0 |
| 88 | 91  | 1 | 0 | 0 | 0 | 0 |
| 91 | 92  | 1 | 0 | 0 | 0 | 0 |
| 91 | 93  | 1 | 0 | 0 | 0 | 0 |
| 91 | 95  | 1 | 0 | 0 | 0 | 0 |
| 95 | 96  | 1 | 0 | 0 | 0 | 0 |
| 95 | 97  | 1 | 0 | 0 | 0 | 0 |
| 98 | 99  | 1 | 0 | 0 | 0 | 0 |

|        |   |   |   |   |   |
|--------|---|---|---|---|---|
| 98100  | 1 | 0 | 0 | 0 | 0 |
| 100101 | 1 | 0 | 0 | 0 | 0 |
| 100102 | 1 | 0 | 0 | 0 | 0 |
| 100103 | 1 | 0 | 0 | 0 | 0 |
| 103104 | 1 | 0 | 0 | 0 | 0 |
| 103105 | 1 | 0 | 0 | 0 | 0 |
| 103106 | 1 | 0 | 0 | 0 | 0 |
| 106107 | 1 | 0 | 0 | 0 | 0 |
| 106108 | 1 | 0 | 0 | 0 | 0 |
| 106109 | 1 | 0 | 0 | 0 | 0 |
| 109110 | 1 | 0 | 0 | 0 | 0 |
| 109111 | 1 | 0 | 0 | 0 | 0 |
| 109112 | 1 | 0 | 0 | 0 | 0 |
| 112113 | 1 | 0 | 0 | 0 | 0 |
| 112114 | 1 | 0 | 0 | 0 | 0 |
| 112115 | 1 | 0 | 0 | 0 | 0 |
| 115128 | 1 | 0 | 0 | 0 | 0 |
| 116117 | 1 | 0 | 0 | 0 | 0 |
| 116118 | 1 | 0 | 0 | 0 | 0 |
| 116119 | 1 | 0 | 0 | 0 | 0 |
| 116143 | 1 | 0 | 0 | 0 | 0 |
| 119120 | 1 | 0 | 0 | 0 | 0 |
| 120121 | 1 | 0 | 0 | 0 | 0 |
| 120127 | 2 | 0 | 0 | 0 | 0 |
| 121122 | 1 | 0 | 0 | 0 | 0 |
| 121123 | 1 | 0 | 0 | 0 | 0 |
| 121124 | 1 | 0 | 0 | 0 | 0 |
| 124125 | 1 | 0 | 0 | 0 | 0 |
| 124126 | 1 | 0 | 0 | 0 | 0 |
| 124163 | 1 | 0 | 0 | 0 | 0 |
| 128129 | 1 | 0 | 0 | 0 | 0 |
| 128130 | 1 | 0 | 0 | 0 | 0 |
| 128131 | 1 | 0 | 0 | 0 | 0 |
| 131132 | 1 | 0 | 0 | 0 | 0 |
| 131133 | 1 | 0 | 0 | 0 | 0 |
| 131134 | 1 | 0 | 0 | 0 | 0 |
| 134135 | 1 | 0 | 0 | 0 | 0 |
| 134142 | 2 | 0 | 0 | 0 | 0 |
| 135136 | 1 | 0 | 0 | 0 | 0 |
| 136137 | 1 | 0 | 0 | 0 | 0 |
| 136138 | 1 | 0 | 0 | 0 | 0 |
| 136139 | 1 | 0 | 0 | 0 | 0 |
| 139140 | 1 | 0 | 0 | 0 | 0 |
| 139141 | 1 | 0 | 0 | 0 | 0 |
| 139143 | 1 | 0 | 0 | 0 | 0 |
| 143144 | 1 | 0 | 0 | 0 | 0 |
| 143145 | 1 | 0 | 0 | 0 | 0 |
| 146147 | 1 | 0 | 0 | 0 | 0 |
| 146148 | 1 | 0 | 0 | 0 | 0 |
| 148149 | 1 | 0 | 0 | 0 | 0 |
| 148150 | 1 | 0 | 0 | 0 | 0 |
| 148151 | 1 | 0 | 0 | 0 | 0 |
| 151152 | 1 | 0 | 0 | 0 | 0 |
| 151153 | 1 | 0 | 0 | 0 | 0 |
| 151154 | 1 | 0 | 0 | 0 | 0 |
| 154155 | 1 | 0 | 0 | 0 | 0 |
| 154156 | 1 | 0 | 0 | 0 | 0 |
| 154157 | 1 | 0 | 0 | 0 | 0 |
| 157158 | 1 | 0 | 0 | 0 | 0 |
| 157159 | 1 | 0 | 0 | 0 | 0 |
| 157160 | 1 | 0 | 0 | 0 | 0 |
| 160161 | 1 | 0 | 0 | 0 | 0 |
| 160162 | 1 | 0 | 0 | 0 | 0 |
| 160163 | 1 | 0 | 0 | 0 | 0 |
| 163176 | 1 | 0 | 0 | 0 | 0 |
| 164165 | 1 | 0 | 0 | 0 | 0 |
| 164166 | 1 | 0 | 0 | 0 | 0 |
| 164167 | 1 | 0 | 0 | 0 | 0 |
| 164191 | 1 | 0 | 0 | 0 | 0 |
| 167168 | 1 | 0 | 0 | 0 | 0 |
| 168169 | 1 | 0 | 0 | 0 | 0 |
| 168175 | 2 | 0 | 0 | 0 | 0 |
| 169170 | 1 | 0 | 0 | 0 | 0 |
| 169171 | 1 | 0 | 0 | 0 | 0 |
| 169172 | 1 | 0 | 0 | 0 | 0 |
| 172173 | 1 | 0 | 0 | 0 | 0 |
| 172174 | 1 | 0 | 0 | 0 | 0 |
| 172211 | 1 | 0 | 0 | 0 | 0 |
| 176177 | 1 | 0 | 0 | 0 | 0 |
| 176178 | 1 | 0 | 0 | 0 | 0 |
| 176179 | 1 | 0 | 0 | 0 | 0 |

|        |   |   |   |   |   |
|--------|---|---|---|---|---|
| 179180 | 1 | 0 | 0 | 0 | 0 |
| 179181 | 1 | 0 | 0 | 0 | 0 |
| 179182 | 1 | 0 | 0 | 0 | 0 |
| 182183 | 1 | 0 | 0 | 0 | 0 |
| 182190 | 2 | 0 | 0 | 0 | 0 |
| 183184 | 1 | 0 | 0 | 0 | 0 |
| 184185 | 1 | 0 | 0 | 0 | 0 |
| 184186 | 1 | 0 | 0 | 0 | 0 |
| 184187 | 1 | 0 | 0 | 0 | 0 |
| 187188 | 1 | 0 | 0 | 0 | 0 |
| 187189 | 1 | 0 | 0 | 0 | 0 |
| 187191 | 1 | 0 | 0 | 0 | 0 |
| 191192 | 1 | 0 | 0 | 0 | 0 |
| 191193 | 1 | 0 | 0 | 0 | 0 |
| 194195 | 1 | 0 | 0 | 0 | 0 |
| 194196 | 1 | 0 | 0 | 0 | 0 |
| 196197 | 1 | 0 | 0 | 0 | 0 |
| 196198 | 1 | 0 | 0 | 0 | 0 |
| 196199 | 1 | 0 | 0 | 0 | 0 |
| 199200 | 1 | 0 | 0 | 0 | 0 |
| 199201 | 1 | 0 | 0 | 0 | 0 |
| 199202 | 1 | 0 | 0 | 0 | 0 |
| 202203 | 1 | 0 | 0 | 0 | 0 |
| 202204 | 1 | 0 | 0 | 0 | 0 |
| 202205 | 1 | 0 | 0 | 0 | 0 |
| 205206 | 1 | 0 | 0 | 0 | 0 |
| 205207 | 1 | 0 | 0 | 0 | 0 |
| 205208 | 1 | 0 | 0 | 0 | 0 |
| 208209 | 1 | 0 | 0 | 0 | 0 |
| 208210 | 1 | 0 | 0 | 0 | 0 |
| 208211 | 1 | 0 | 0 | 0 | 0 |
| 211224 | 1 | 0 | 0 | 0 | 0 |
| 212213 | 1 | 0 | 0 | 0 | 0 |
| 212214 | 1 | 0 | 0 | 0 | 0 |
| 212215 | 1 | 0 | 0 | 0 | 0 |
| 212239 | 1 | 0 | 0 | 0 | 0 |
| 215216 | 1 | 0 | 0 | 0 | 0 |
| 216217 | 1 | 0 | 0 | 0 | 0 |
| 216223 | 2 | 0 | 0 | 0 | 0 |
| 217218 | 1 | 0 | 0 | 0 | 0 |
| 217219 | 1 | 0 | 0 | 0 | 0 |
| 217220 | 1 | 0 | 0 | 0 | 0 |
| 220221 | 1 | 0 | 0 | 0 | 0 |
| 220222 | 1 | 0 | 0 | 0 | 0 |
| 220259 | 1 | 0 | 0 | 0 | 0 |
| 224225 | 1 | 0 | 0 | 0 | 0 |
| 224226 | 1 | 0 | 0 | 0 | 0 |
| 224227 | 1 | 0 | 0 | 0 | 0 |
| 227228 | 1 | 0 | 0 | 0 | 0 |
| 227229 | 1 | 0 | 0 | 0 | 0 |
| 227230 | 1 | 0 | 0 | 0 | 0 |
| 230231 | 1 | 0 | 0 | 0 | 0 |
| 230238 | 2 | 0 | 0 | 0 | 0 |
| 231232 | 1 | 0 | 0 | 0 | 0 |
| 232233 | 1 | 0 | 0 | 0 | 0 |
| 232234 | 1 | 0 | 0 | 0 | 0 |
| 232235 | 1 | 0 | 0 | 0 | 0 |
| 235236 | 1 | 0 | 0 | 0 | 0 |
| 235237 | 1 | 0 | 0 | 0 | 0 |
| 235239 | 1 | 0 | 0 | 0 | 0 |
| 239240 | 1 | 0 | 0 | 0 | 0 |
| 239241 | 1 | 0 | 0 | 0 | 0 |
| 242243 | 1 | 0 | 0 | 0 | 0 |
| 242244 | 1 | 0 | 0 | 0 | 0 |
| 244245 | 1 | 0 | 0 | 0 | 0 |
| 244246 | 1 | 0 | 0 | 0 | 0 |
| 244247 | 1 | 0 | 0 | 0 | 0 |
| 247248 | 1 | 0 | 0 | 0 | 0 |
| 247249 | 1 | 0 | 0 | 0 | 0 |
| 247250 | 1 | 0 | 0 | 0 | 0 |
| 250251 | 1 | 0 | 0 | 0 | 0 |
| 250252 | 1 | 0 | 0 | 0 | 0 |
| 250253 | 1 | 0 | 0 | 0 | 0 |
| 253254 | 1 | 0 | 0 | 0 | 0 |
| 253255 | 1 | 0 | 0 | 0 | 0 |
| 253256 | 1 | 0 | 0 | 0 | 0 |
| 256257 | 1 | 0 | 0 | 0 | 0 |
| 256258 | 1 | 0 | 0 | 0 | 0 |
| 256259 | 1 | 0 | 0 | 0 | 0 |
| 259260 | 1 | 0 | 0 | 0 | 0 |

M END











|     |     |   |   |   |   |   |
|-----|-----|---|---|---|---|---|
| 38  | 39  | 1 | 0 | 0 | 0 | 0 |
| 38  | 40  | 1 | 0 | 0 | 0 | 0 |
| 38  | 41  | 1 | 0 | 0 | 0 | 0 |
| 41  | 42  | 1 | 0 | 0 | 0 | 0 |
| 41  | 49  | 2 | 0 | 0 | 0 | 0 |
| 42  | 43  | 1 | 0 | 0 | 0 | 0 |
| 43  | 44  | 1 | 0 | 0 | 0 | 0 |
| 43  | 45  | 1 | 0 | 0 | 0 | 0 |
| 43  | 46  | 1 | 0 | 0 | 0 | 0 |
| 46  | 47  | 1 | 0 | 0 | 0 | 0 |
| 46  | 48  | 1 | 0 | 0 | 0 | 0 |
| 46  | 50  | 1 | 0 | 0 | 0 | 0 |
| 50  | 51  | 1 | 0 | 0 | 0 | 0 |
| 50  | 52  | 1 | 0 | 0 | 0 | 0 |
| 53  | 54  | 1 | 0 | 0 | 0 | 0 |
| 53  | 55  | 1 | 0 | 0 | 0 | 0 |
| 55  | 56  | 1 | 0 | 0 | 0 | 0 |
| 55  | 57  | 1 | 0 | 0 | 0 | 0 |
| 55  | 58  | 1 | 0 | 0 | 0 | 0 |
| 58  | 59  | 1 | 0 | 0 | 0 | 0 |
| 58  | 60  | 1 | 0 | 0 | 0 | 0 |
| 58  | 61  | 1 | 0 | 0 | 0 | 0 |
| 61  | 62  | 1 | 0 | 0 | 0 | 0 |
| 61  | 63  | 1 | 0 | 0 | 0 | 0 |
| 61  | 64  | 1 | 0 | 0 | 0 | 0 |
| 64  | 65  | 1 | 0 | 0 | 0 | 0 |
| 64  | 66  | 1 | 0 | 0 | 0 | 0 |
| 64  | 67  | 1 | 0 | 0 | 0 | 0 |
| 67  | 68  | 1 | 0 | 0 | 0 | 0 |
| 67  | 69  | 1 | 0 | 0 | 0 | 0 |
| 67  | 70  | 1 | 0 | 0 | 0 | 0 |
| 70  | 71  | 1 | 0 | 0 | 0 | 0 |
| 70  | 72  | 1 | 0 | 0 | 0 | 0 |
| 70  | 73  | 1 | 0 | 0 | 0 | 0 |
| 73  | 86  | 1 | 0 | 0 | 0 | 0 |
| 74  | 75  | 1 | 0 | 0 | 0 | 0 |
| 74  | 76  | 1 | 0 | 0 | 0 | 0 |
| 74  | 77  | 1 | 0 | 0 | 0 | 0 |
| 74  | 101 | 1 | 0 | 0 | 0 | 0 |
| 77  | 78  | 1 | 0 | 0 | 0 | 0 |
| 78  | 79  | 1 | 0 | 0 | 0 | 0 |
| 78  | 85  | 2 | 0 | 0 | 0 | 0 |
| 79  | 80  | 1 | 0 | 0 | 0 | 0 |
| 79  | 81  | 1 | 0 | 0 | 0 | 0 |
| 79  | 82  | 1 | 0 | 0 | 0 | 0 |
| 82  | 83  | 1 | 0 | 0 | 0 | 0 |
| 82  | 84  | 1 | 0 | 0 | 0 | 0 |
| 82  | 124 | 1 | 0 | 0 | 0 | 0 |
| 86  | 87  | 1 | 0 | 0 | 0 | 0 |
| 86  | 88  | 1 | 0 | 0 | 0 | 0 |
| 86  | 89  | 1 | 0 | 0 | 0 | 0 |
| 89  | 90  | 1 | 0 | 0 | 0 | 0 |
| 89  | 91  | 1 | 0 | 0 | 0 | 0 |
| 89  | 92  | 1 | 0 | 0 | 0 | 0 |
| 92  | 93  | 1 | 0 | 0 | 0 | 0 |
| 92  | 100 | 2 | 0 | 0 | 0 | 0 |
| 93  | 94  | 1 | 0 | 0 | 0 | 0 |
| 94  | 95  | 1 | 0 | 0 | 0 | 0 |
| 94  | 96  | 1 | 0 | 0 | 0 | 0 |
| 94  | 97  | 1 | 0 | 0 | 0 | 0 |
| 97  | 98  | 1 | 0 | 0 | 0 | 0 |
| 97  | 99  | 1 | 0 | 0 | 0 | 0 |
| 97  | 101 | 1 | 0 | 0 | 0 | 0 |
| 101 | 102 | 1 | 0 | 0 | 0 | 0 |
| 101 | 103 | 1 | 0 | 0 | 0 | 0 |
| 104 | 105 | 1 | 0 | 0 | 0 | 0 |
| 104 | 106 | 1 | 0 | 0 | 0 | 0 |
| 106 | 107 | 1 | 0 | 0 | 0 | 0 |
| 106 | 108 | 1 | 0 | 0 | 0 | 0 |
| 106 | 109 | 1 | 0 | 0 | 0 | 0 |
| 109 | 110 | 1 | 0 | 0 | 0 | 0 |
| 109 | 111 | 1 | 0 | 0 | 0 | 0 |
| 109 | 112 | 1 | 0 | 0 | 0 | 0 |
| 112 | 113 | 1 | 0 | 0 | 0 | 0 |
| 112 | 114 | 1 | 0 | 0 | 0 | 0 |
| 112 | 115 | 1 | 0 | 0 | 0 | 0 |
| 115 | 116 | 1 | 0 | 0 | 0 | 0 |
| 115 | 117 | 1 | 0 | 0 | 0 | 0 |
| 115 | 118 | 1 | 0 | 0 | 0 | 0 |
| 118 | 119 | 1 | 0 | 0 | 0 | 0 |
| 118 | 120 | 1 | 0 | 0 | 0 | 0 |

|        |   |   |   |   |   |
|--------|---|---|---|---|---|
| 118121 | 1 | 0 | 0 | 0 | 0 |
| 121122 | 1 | 0 | 0 | 0 | 0 |
| 121123 | 1 | 0 | 0 | 0 | 0 |
| 121124 | 1 | 0 | 0 | 0 | 0 |
| 124137 | 1 | 0 | 0 | 0 | 0 |
| 125126 | 1 | 0 | 0 | 0 | 0 |
| 125127 | 1 | 0 | 0 | 0 | 0 |
| 125128 | 1 | 0 | 0 | 0 | 0 |
| 125152 | 1 | 0 | 0 | 0 | 0 |
| 128129 | 1 | 0 | 0 | 0 | 0 |
| 129130 | 1 | 0 | 0 | 0 | 0 |
| 129136 | 2 | 0 | 0 | 0 | 0 |
| 130131 | 1 | 0 | 0 | 0 | 0 |
| 130132 | 1 | 0 | 0 | 0 | 0 |
| 130133 | 1 | 0 | 0 | 0 | 0 |
| 133134 | 1 | 0 | 0 | 0 | 0 |
| 133135 | 1 | 0 | 0 | 0 | 0 |
| 133175 | 1 | 0 | 0 | 0 | 0 |
| 137138 | 1 | 0 | 0 | 0 | 0 |
| 137139 | 1 | 0 | 0 | 0 | 0 |
| 137140 | 1 | 0 | 0 | 0 | 0 |
| 140141 | 1 | 0 | 0 | 0 | 0 |
| 140142 | 1 | 0 | 0 | 0 | 0 |
| 140143 | 1 | 0 | 0 | 0 | 0 |
| 143144 | 1 | 0 | 0 | 0 | 0 |
| 143151 | 2 | 0 | 0 | 0 | 0 |
| 144145 | 1 | 0 | 0 | 0 | 0 |
| 145146 | 1 | 0 | 0 | 0 | 0 |
| 145147 | 1 | 0 | 0 | 0 | 0 |
| 145148 | 1 | 0 | 0 | 0 | 0 |
| 148149 | 1 | 0 | 0 | 0 | 0 |
| 148150 | 1 | 0 | 0 | 0 | 0 |
| 148152 | 1 | 0 | 0 | 0 | 0 |
| 152153 | 1 | 0 | 0 | 0 | 0 |
| 152154 | 1 | 0 | 0 | 0 | 0 |
| 155156 | 1 | 0 | 0 | 0 | 0 |
| 155157 | 1 | 0 | 0 | 0 | 0 |
| 157158 | 1 | 0 | 0 | 0 | 0 |
| 157159 | 1 | 0 | 0 | 0 | 0 |
| 157160 | 1 | 0 | 0 | 0 | 0 |
| 160161 | 1 | 0 | 0 | 0 | 0 |
| 160162 | 1 | 0 | 0 | 0 | 0 |
| 160163 | 1 | 0 | 0 | 0 | 0 |
| 163164 | 1 | 0 | 0 | 0 | 0 |
| 163165 | 1 | 0 | 0 | 0 | 0 |
| 163166 | 1 | 0 | 0 | 0 | 0 |
| 166167 | 1 | 0 | 0 | 0 | 0 |
| 166168 | 1 | 0 | 0 | 0 | 0 |
| 166169 | 1 | 0 | 0 | 0 | 0 |
| 169170 | 1 | 0 | 0 | 0 | 0 |
| 169171 | 1 | 0 | 0 | 0 | 0 |
| 169172 | 1 | 0 | 0 | 0 | 0 |
| 172173 | 1 | 0 | 0 | 0 | 0 |
| 172174 | 1 | 0 | 0 | 0 | 0 |
| 172175 | 1 | 0 | 0 | 0 | 0 |
| 175188 | 1 | 0 | 0 | 0 | 0 |
| 176177 | 1 | 0 | 0 | 0 | 0 |
| 176178 | 1 | 0 | 0 | 0 | 0 |
| 176179 | 1 | 0 | 0 | 0 | 0 |
| 176203 | 1 | 0 | 0 | 0 | 0 |
| 179180 | 1 | 0 | 0 | 0 | 0 |
| 180181 | 1 | 0 | 0 | 0 | 0 |
| 180187 | 2 | 0 | 0 | 0 | 0 |
| 181182 | 1 | 0 | 0 | 0 | 0 |
| 181183 | 1 | 0 | 0 | 0 | 0 |
| 181184 | 1 | 0 | 0 | 0 | 0 |
| 184185 | 1 | 0 | 0 | 0 | 0 |
| 184186 | 1 | 0 | 0 | 0 | 0 |
| 184226 | 1 | 0 | 0 | 0 | 0 |
| 188189 | 1 | 0 | 0 | 0 | 0 |
| 188190 | 1 | 0 | 0 | 0 | 0 |
| 188191 | 1 | 0 | 0 | 0 | 0 |
| 191192 | 1 | 0 | 0 | 0 | 0 |
| 191193 | 1 | 0 | 0 | 0 | 0 |
| 191194 | 1 | 0 | 0 | 0 | 0 |
| 194195 | 1 | 0 | 0 | 0 | 0 |
| 194202 | 2 | 0 | 0 | 0 | 0 |
| 195196 | 1 | 0 | 0 | 0 | 0 |
| 196197 | 1 | 0 | 0 | 0 | 0 |
| 196198 | 1 | 0 | 0 | 0 | 0 |
| 196199 | 1 | 0 | 0 | 0 | 0 |

|        |   |   |   |   |   |
|--------|---|---|---|---|---|
| 199200 | 1 | 0 | 0 | 0 | 0 |
| 199201 | 1 | 0 | 0 | 0 | 0 |
| 199203 | 1 | 0 | 0 | 0 | 0 |
| 203204 | 1 | 0 | 0 | 0 | 0 |
| 203205 | 1 | 0 | 0 | 0 | 0 |
| 206207 | 1 | 0 | 0 | 0 | 0 |
| 206208 | 1 | 0 | 0 | 0 | 0 |
| 208209 | 1 | 0 | 0 | 0 | 0 |
| 208210 | 1 | 0 | 0 | 0 | 0 |
| 208211 | 1 | 0 | 0 | 0 | 0 |
| 211212 | 1 | 0 | 0 | 0 | 0 |
| 211213 | 1 | 0 | 0 | 0 | 0 |
| 211214 | 1 | 0 | 0 | 0 | 0 |
| 214215 | 1 | 0 | 0 | 0 | 0 |
| 214216 | 1 | 0 | 0 | 0 | 0 |
| 214217 | 1 | 0 | 0 | 0 | 0 |
| 217218 | 1 | 0 | 0 | 0 | 0 |
| 217219 | 1 | 0 | 0 | 0 | 0 |
| 217220 | 1 | 0 | 0 | 0 | 0 |
| 220221 | 1 | 0 | 0 | 0 | 0 |
| 220222 | 1 | 0 | 0 | 0 | 0 |
| 220223 | 1 | 0 | 0 | 0 | 0 |
| 223224 | 1 | 0 | 0 | 0 | 0 |
| 223225 | 1 | 0 | 0 | 0 | 0 |
| 223226 | 1 | 0 | 0 | 0 | 0 |
| 226239 | 1 | 0 | 0 | 0 | 0 |
| 227228 | 1 | 0 | 0 | 0 | 0 |
| 227229 | 1 | 0 | 0 | 0 | 0 |
| 227230 | 1 | 0 | 0 | 0 | 0 |
| 227254 | 1 | 0 | 0 | 0 | 0 |
| 230231 | 1 | 0 | 0 | 0 | 0 |
| 231232 | 1 | 0 | 0 | 0 | 0 |
| 231238 | 2 | 0 | 0 | 0 | 0 |
| 232233 | 1 | 0 | 0 | 0 | 0 |
| 232234 | 1 | 0 | 0 | 0 | 0 |
| 232235 | 1 | 0 | 0 | 0 | 0 |
| 235236 | 1 | 0 | 0 | 0 | 0 |
| 235237 | 1 | 0 | 0 | 0 | 0 |
| 235277 | 1 | 0 | 0 | 0 | 0 |
| 239240 | 1 | 0 | 0 | 0 | 0 |
| 239241 | 1 | 0 | 0 | 0 | 0 |
| 239242 | 1 | 0 | 0 | 0 | 0 |
| 242243 | 1 | 0 | 0 | 0 | 0 |
| 242244 | 1 | 0 | 0 | 0 | 0 |
| 242245 | 1 | 0 | 0 | 0 | 0 |
| 245246 | 1 | 0 | 0 | 0 | 0 |
| 245253 | 2 | 0 | 0 | 0 | 0 |
| 246247 | 1 | 0 | 0 | 0 | 0 |
| 247248 | 1 | 0 | 0 | 0 | 0 |
| 247249 | 1 | 0 | 0 | 0 | 0 |
| 247250 | 1 | 0 | 0 | 0 | 0 |
| 250251 | 1 | 0 | 0 | 0 | 0 |
| 250252 | 1 | 0 | 0 | 0 | 0 |
| 250254 | 1 | 0 | 0 | 0 | 0 |
| 254255 | 1 | 0 | 0 | 0 | 0 |
| 254256 | 1 | 0 | 0 | 0 | 0 |
| 257258 | 1 | 0 | 0 | 0 | 0 |
| 257259 | 1 | 0 | 0 | 0 | 0 |
| 259260 | 1 | 0 | 0 | 0 | 0 |
| 259261 | 1 | 0 | 0 | 0 | 0 |
| 259262 | 1 | 0 | 0 | 0 | 0 |
| 262263 | 1 | 0 | 0 | 0 | 0 |
| 262264 | 1 | 0 | 0 | 0 | 0 |
| 262265 | 1 | 0 | 0 | 0 | 0 |
| 265266 | 1 | 0 | 0 | 0 | 0 |
| 265267 | 1 | 0 | 0 | 0 | 0 |
| 265268 | 1 | 0 | 0 | 0 | 0 |
| 268269 | 1 | 0 | 0 | 0 | 0 |
| 268270 | 1 | 0 | 0 | 0 | 0 |
| 268271 | 1 | 0 | 0 | 0 | 0 |
| 271272 | 1 | 0 | 0 | 0 | 0 |
| 271273 | 1 | 0 | 0 | 0 | 0 |
| 271274 | 1 | 0 | 0 | 0 | 0 |
| 274275 | 1 | 0 | 0 | 0 | 0 |
| 274276 | 1 | 0 | 0 | 0 | 0 |
| 274277 | 1 | 0 | 0 | 0 | 0 |
| 277278 | 1 | 0 | 0 | 0 | 0 |

M END  
> <NAME>  
C36\_12











|     |     |   |   |   |   |   |
|-----|-----|---|---|---|---|---|
| 32  | 68  | 1 | 0 | 0 | 0 | 0 |
| 36  | 37  | 1 | 0 | 0 | 0 | 0 |
| 36  | 38  | 1 | 0 | 0 | 0 | 0 |
| 36  | 39  | 1 | 0 | 0 | 0 | 0 |
| 39  | 40  | 1 | 0 | 0 | 0 | 0 |
| 39  | 41  | 1 | 0 | 0 | 0 | 0 |
| 39  | 42  | 1 | 0 | 0 | 0 | 0 |
| 42  | 43  | 1 | 0 | 0 | 0 | 0 |
| 42  | 50  | 2 | 0 | 0 | 0 | 0 |
| 43  | 44  | 1 | 0 | 0 | 0 | 0 |
| 44  | 45  | 1 | 0 | 0 | 0 | 0 |
| 44  | 46  | 1 | 0 | 0 | 0 | 0 |
| 44  | 47  | 1 | 0 | 0 | 0 | 0 |
| 47  | 48  | 1 | 0 | 0 | 0 | 0 |
| 47  | 49  | 1 | 0 | 0 | 0 | 0 |
| 47  | 51  | 1 | 0 | 0 | 0 | 0 |
| 51  | 52  | 1 | 0 | 0 | 0 | 0 |
| 51  | 53  | 1 | 0 | 0 | 0 | 0 |
| 54  | 55  | 1 | 0 | 0 | 0 | 0 |
| 54  | 56  | 1 | 0 | 0 | 0 | 0 |
| 54  | 57  | 1 | 0 | 0 | 0 | 0 |
| 54  | 58  | 1 | 0 | 0 | 0 | 0 |
| 58  | 59  | 1 | 0 | 0 | 0 | 0 |
| 58  | 60  | 1 | 0 | 0 | 0 | 0 |
| 58  | 61  | 1 | 0 | 0 | 0 | 0 |
| 61  | 62  | 1 | 0 | 0 | 0 | 0 |
| 61  | 69  | 1 | 0 | 0 | 0 | 0 |
| 62  | 63  | 1 | 0 | 0 | 0 | 0 |
| 62  | 64  | 1 | 0 | 0 | 0 | 0 |
| 62  | 65  | 1 | 0 | 0 | 0 | 0 |
| 65  | 66  | 1 | 0 | 0 | 0 | 0 |
| 65  | 67  | 1 | 0 | 0 | 0 | 0 |
| 65  | 68  | 1 | 0 | 0 | 0 | 0 |
| 68  | 88  | 1 | 0 | 0 | 0 | 0 |
| 69  | 70  | 1 | 0 | 0 | 0 | 0 |
| 69  | 71  | 1 | 0 | 0 | 0 | 0 |
| 69  | 72  | 1 | 0 | 0 | 0 | 0 |
| 72  | 73  | 1 | 0 | 0 | 0 | 0 |
| 72  | 74  | 1 | 0 | 0 | 0 | 0 |
| 72  | 75  | 1 | 0 | 0 | 0 | 0 |
| 76  | 77  | 1 | 0 | 0 | 0 | 0 |
| 76  | 78  | 1 | 0 | 0 | 0 | 0 |
| 76  | 79  | 1 | 0 | 0 | 0 | 0 |
| 76  | 103 | 1 | 0 | 0 | 0 | 0 |
| 79  | 80  | 1 | 0 | 0 | 0 | 0 |
| 80  | 81  | 1 | 0 | 0 | 0 | 0 |
| 80  | 87  | 2 | 0 | 0 | 0 | 0 |
| 81  | 82  | 1 | 0 | 0 | 0 | 0 |
| 81  | 83  | 1 | 0 | 0 | 0 | 0 |
| 81  | 84  | 1 | 0 | 0 | 0 | 0 |
| 84  | 85  | 1 | 0 | 0 | 0 | 0 |
| 84  | 86  | 1 | 0 | 0 | 0 | 0 |
| 84  | 120 | 1 | 0 | 0 | 0 | 0 |
| 88  | 89  | 1 | 0 | 0 | 0 | 0 |
| 88  | 90  | 1 | 0 | 0 | 0 | 0 |
| 88  | 91  | 1 | 0 | 0 | 0 | 0 |
| 91  | 92  | 1 | 0 | 0 | 0 | 0 |
| 91  | 93  | 1 | 0 | 0 | 0 | 0 |
| 91  | 94  | 1 | 0 | 0 | 0 | 0 |
| 94  | 95  | 1 | 0 | 0 | 0 | 0 |
| 94  | 102 | 2 | 0 | 0 | 0 | 0 |
| 95  | 96  | 1 | 0 | 0 | 0 | 0 |
| 96  | 97  | 1 | 0 | 0 | 0 | 0 |
| 96  | 98  | 1 | 0 | 0 | 0 | 0 |
| 96  | 99  | 1 | 0 | 0 | 0 | 0 |
| 99  | 100 | 1 | 0 | 0 | 0 | 0 |
| 99  | 101 | 1 | 0 | 0 | 0 | 0 |
| 99  | 103 | 1 | 0 | 0 | 0 | 0 |
| 103 | 104 | 1 | 0 | 0 | 0 | 0 |
| 103 | 105 | 1 | 0 | 0 | 0 | 0 |
| 106 | 107 | 1 | 0 | 0 | 0 | 0 |
| 106 | 108 | 1 | 0 | 0 | 0 | 0 |
| 106 | 109 | 1 | 0 | 0 | 0 | 0 |
| 106 | 110 | 1 | 0 | 0 | 0 | 0 |
| 110 | 111 | 1 | 0 | 0 | 0 | 0 |
| 110 | 112 | 1 | 0 | 0 | 0 | 0 |
| 110 | 113 | 1 | 0 | 0 | 0 | 0 |
| 113 | 114 | 1 | 0 | 0 | 0 | 0 |
| 113 | 121 | 1 | 0 | 0 | 0 | 0 |
| 114 | 115 | 1 | 0 | 0 | 0 | 0 |
| 114 | 116 | 1 | 0 | 0 | 0 | 0 |

|        |   |   |   |   |   |
|--------|---|---|---|---|---|
| 114117 | 1 | 0 | 0 | 0 | 0 |
| 117118 | 1 | 0 | 0 | 0 | 0 |
| 117119 | 1 | 0 | 0 | 0 | 0 |
| 117120 | 1 | 0 | 0 | 0 | 0 |
| 120140 | 1 | 0 | 0 | 0 | 0 |
| 121122 | 1 | 0 | 0 | 0 | 0 |
| 121123 | 1 | 0 | 0 | 0 | 0 |
| 121124 | 1 | 0 | 0 | 0 | 0 |
| 124125 | 1 | 0 | 0 | 0 | 0 |
| 124126 | 1 | 0 | 0 | 0 | 0 |
| 124127 | 1 | 0 | 0 | 0 | 0 |
| 128129 | 1 | 0 | 0 | 0 | 0 |
| 128130 | 1 | 0 | 0 | 0 | 0 |
| 128131 | 1 | 0 | 0 | 0 | 0 |
| 128155 | 1 | 0 | 0 | 0 | 0 |
| 131132 | 1 | 0 | 0 | 0 | 0 |
| 132133 | 1 | 0 | 0 | 0 | 0 |
| 132139 | 2 | 0 | 0 | 0 | 0 |
| 133134 | 1 | 0 | 0 | 0 | 0 |
| 133135 | 1 | 0 | 0 | 0 | 0 |
| 133136 | 1 | 0 | 0 | 0 | 0 |
| 136137 | 1 | 0 | 0 | 0 | 0 |
| 136138 | 1 | 0 | 0 | 0 | 0 |
| 136172 | 1 | 0 | 0 | 0 | 0 |
| 140141 | 1 | 0 | 0 | 0 | 0 |
| 140142 | 1 | 0 | 0 | 0 | 0 |
| 140143 | 1 | 0 | 0 | 0 | 0 |
| 143144 | 1 | 0 | 0 | 0 | 0 |
| 143145 | 1 | 0 | 0 | 0 | 0 |
| 143146 | 1 | 0 | 0 | 0 | 0 |
| 146147 | 1 | 0 | 0 | 0 | 0 |
| 146154 | 2 | 0 | 0 | 0 | 0 |
| 147148 | 1 | 0 | 0 | 0 | 0 |
| 148149 | 1 | 0 | 0 | 0 | 0 |
| 148150 | 1 | 0 | 0 | 0 | 0 |
| 148151 | 1 | 0 | 0 | 0 | 0 |
| 151152 | 1 | 0 | 0 | 0 | 0 |
| 151153 | 1 | 0 | 0 | 0 | 0 |
| 151155 | 1 | 0 | 0 | 0 | 0 |
| 155156 | 1 | 0 | 0 | 0 | 0 |
| 155157 | 1 | 0 | 0 | 0 | 0 |
| 158159 | 1 | 0 | 0 | 0 | 0 |
| 158160 | 1 | 0 | 0 | 0 | 0 |
| 158161 | 1 | 0 | 0 | 0 | 0 |
| 158162 | 1 | 0 | 0 | 0 | 0 |
| 162163 | 1 | 0 | 0 | 0 | 0 |
| 162164 | 1 | 0 | 0 | 0 | 0 |
| 162165 | 1 | 0 | 0 | 0 | 0 |
| 165166 | 1 | 0 | 0 | 0 | 0 |
| 165173 | 1 | 0 | 0 | 0 | 0 |
| 166167 | 1 | 0 | 0 | 0 | 0 |
| 166168 | 1 | 0 | 0 | 0 | 0 |
| 166169 | 1 | 0 | 0 | 0 | 0 |
| 169170 | 1 | 0 | 0 | 0 | 0 |
| 169171 | 1 | 0 | 0 | 0 | 0 |
| 169172 | 1 | 0 | 0 | 0 | 0 |
| 172192 | 1 | 0 | 0 | 0 | 0 |
| 173174 | 1 | 0 | 0 | 0 | 0 |
| 173175 | 1 | 0 | 0 | 0 | 0 |
| 173176 | 1 | 0 | 0 | 0 | 0 |
| 176177 | 1 | 0 | 0 | 0 | 0 |
| 176178 | 1 | 0 | 0 | 0 | 0 |
| 176179 | 1 | 0 | 0 | 0 | 0 |
| 180181 | 1 | 0 | 0 | 0 | 0 |
| 180182 | 1 | 0 | 0 | 0 | 0 |
| 180183 | 1 | 0 | 0 | 0 | 0 |
| 180207 | 1 | 0 | 0 | 0 | 0 |
| 183184 | 1 | 0 | 0 | 0 | 0 |
| 184185 | 1 | 0 | 0 | 0 | 0 |
| 184191 | 2 | 0 | 0 | 0 | 0 |
| 185186 | 1 | 0 | 0 | 0 | 0 |
| 185187 | 1 | 0 | 0 | 0 | 0 |
| 185188 | 1 | 0 | 0 | 0 | 0 |
| 188189 | 1 | 0 | 0 | 0 | 0 |
| 188190 | 1 | 0 | 0 | 0 | 0 |
| 188224 | 1 | 0 | 0 | 0 | 0 |
| 192193 | 1 | 0 | 0 | 0 | 0 |
| 192194 | 1 | 0 | 0 | 0 | 0 |
| 192195 | 1 | 0 | 0 | 0 | 0 |
| 195196 | 1 | 0 | 0 | 0 | 0 |
| 195197 | 1 | 0 | 0 | 0 | 0 |

|        |   |   |   |   |   |
|--------|---|---|---|---|---|
| 195198 | 1 | 0 | 0 | 0 | 0 |
| 198199 | 1 | 0 | 0 | 0 | 0 |
| 198206 | 2 | 0 | 0 | 0 | 0 |
| 199200 | 1 | 0 | 0 | 0 | 0 |
| 200201 | 1 | 0 | 0 | 0 | 0 |
| 200202 | 1 | 0 | 0 | 0 | 0 |
| 200203 | 1 | 0 | 0 | 0 | 0 |
| 203204 | 1 | 0 | 0 | 0 | 0 |
| 203205 | 1 | 0 | 0 | 0 | 0 |
| 203207 | 1 | 0 | 0 | 0 | 0 |
| 207208 | 1 | 0 | 0 | 0 | 0 |
| 207209 | 1 | 0 | 0 | 0 | 0 |
| 210211 | 1 | 0 | 0 | 0 | 0 |
| 210212 | 1 | 0 | 0 | 0 | 0 |
| 210213 | 1 | 0 | 0 | 0 | 0 |
| 210214 | 1 | 0 | 0 | 0 | 0 |
| 214215 | 1 | 0 | 0 | 0 | 0 |
| 214216 | 1 | 0 | 0 | 0 | 0 |
| 214217 | 1 | 0 | 0 | 0 | 0 |
| 217218 | 1 | 0 | 0 | 0 | 0 |
| 217225 | 1 | 0 | 0 | 0 | 0 |
| 218219 | 1 | 0 | 0 | 0 | 0 |
| 218220 | 1 | 0 | 0 | 0 | 0 |
| 218221 | 1 | 0 | 0 | 0 | 0 |
| 221222 | 1 | 0 | 0 | 0 | 0 |
| 221223 | 1 | 0 | 0 | 0 | 0 |
| 221224 | 1 | 0 | 0 | 0 | 0 |
| 224244 | 1 | 0 | 0 | 0 | 0 |
| 225226 | 1 | 0 | 0 | 0 | 0 |
| 225227 | 1 | 0 | 0 | 0 | 0 |
| 225228 | 1 | 0 | 0 | 0 | 0 |
| 228229 | 1 | 0 | 0 | 0 | 0 |
| 228230 | 1 | 0 | 0 | 0 | 0 |
| 228231 | 1 | 0 | 0 | 0 | 0 |
| 232233 | 1 | 0 | 0 | 0 | 0 |
| 232234 | 1 | 0 | 0 | 0 | 0 |
| 232235 | 1 | 0 | 0 | 0 | 0 |
| 232259 | 1 | 0 | 0 | 0 | 0 |
| 235236 | 1 | 0 | 0 | 0 | 0 |
| 236237 | 1 | 0 | 0 | 0 | 0 |
| 236243 | 2 | 0 | 0 | 0 | 0 |
| 237238 | 1 | 0 | 0 | 0 | 0 |
| 237239 | 1 | 0 | 0 | 0 | 0 |
| 237240 | 1 | 0 | 0 | 0 | 0 |
| 240241 | 1 | 0 | 0 | 0 | 0 |
| 240242 | 1 | 0 | 0 | 0 | 0 |
| 240276 | 1 | 0 | 0 | 0 | 0 |
| 244245 | 1 | 0 | 0 | 0 | 0 |
| 244246 | 1 | 0 | 0 | 0 | 0 |
| 244247 | 1 | 0 | 0 | 0 | 0 |
| 247248 | 1 | 0 | 0 | 0 | 0 |
| 247249 | 1 | 0 | 0 | 0 | 0 |
| 247250 | 1 | 0 | 0 | 0 | 0 |
| 250251 | 1 | 0 | 0 | 0 | 0 |
| 250258 | 2 | 0 | 0 | 0 | 0 |
| 251252 | 1 | 0 | 0 | 0 | 0 |
| 252253 | 1 | 0 | 0 | 0 | 0 |
| 252254 | 1 | 0 | 0 | 0 | 0 |
| 252255 | 1 | 0 | 0 | 0 | 0 |
| 255256 | 1 | 0 | 0 | 0 | 0 |
| 255257 | 1 | 0 | 0 | 0 | 0 |
| 255259 | 1 | 0 | 0 | 0 | 0 |
| 259260 | 1 | 0 | 0 | 0 | 0 |
| 259261 | 1 | 0 | 0 | 0 | 0 |
| 262263 | 1 | 0 | 0 | 0 | 0 |
| 262264 | 1 | 0 | 0 | 0 | 0 |
| 262265 | 1 | 0 | 0 | 0 | 0 |
| 262266 | 1 | 0 | 0 | 0 | 0 |
| 266267 | 1 | 0 | 0 | 0 | 0 |
| 266268 | 1 | 0 | 0 | 0 | 0 |
| 266269 | 1 | 0 | 0 | 0 | 0 |
| 269270 | 1 | 0 | 0 | 0 | 0 |
| 269278 | 1 | 0 | 0 | 0 | 0 |
| 270271 | 1 | 0 | 0 | 0 | 0 |
| 270272 | 1 | 0 | 0 | 0 | 0 |
| 270273 | 1 | 0 | 0 | 0 | 0 |
| 273274 | 1 | 0 | 0 | 0 | 0 |
| 273275 | 1 | 0 | 0 | 0 | 0 |
| 273276 | 1 | 0 | 0 | 0 | 0 |
| 276277 | 1 | 0 | 0 | 0 | 0 |
| 278279 | 1 | 0 | 0 | 0 | 0 |

278280 1 0 0 0 0  
278281 1 0 0 0 0  
281282 1 0 0 0 0  
281283 1 0 0 0 0  
281284 1 0 0 0 0  
M END  
> <NAME>  
C75\_12

\$\$\$  
C80\_12  
MOE2012 3D

266265 0 0 1 0 0 0 0 0999 V2000  
19.6340 -6.0220 -25.8050 C 0 0 0 0 0 0 0 0 0 0 0 0 0 0 0 0  
20.4440 -6.7170 -25.5580 H 0 0 0 0 0 0 0 0 0 0 0 0 0 0 0 0  
19.1270 -6.3890 -26.7050 H 0 0 0 0 0 0 0 0 0 0 0 0 0 0 0 0  
18.9270 -6.0610 -24.9690 H 0 0 0 0 0 0 0 0 0 0 0 0 0 0 0 0  
20.1540 -4.6630 -25.9790 N 0 0 0 0 0 0 0 0 0 0 0 0 0 0 0 0  
19.0470 -3.7310 -26.2500 C 0 0 0 0 0 0 0 0 0 0 0 0 0 0 0 0  
18.5860 -3.9420 -27.2240 H 0 0 0 0 0 0 0 0 0 0 0 0 0 0 0 0  
18.2680 -3.8810 -25.4910 H 0 0 0 0 0 0 0 0 0 0 0 0 0 0 0 0  
19.4770 -2.2590 -26.1790 C 0 0 0 0 0 0 0 0 0 0 0 0 0 0 0 0  
19.9950 -2.0860 -25.2290 H 0 0 0 0 0 0 0 0 0 0 0 0 0 0 0 0  
20.1800 -2.0260 -26.9870 H 0 0 0 0 0 0 0 0 0 0 0 0 0 0 0 0  
18.2610 -1.3330 -26.2950 C 0 0 0 0 0 0 0 0 0 0 0 0 0 0 0 0  
17.7310 -1.5620 -27.2280 H 0 0 0 0 0 0 0 0 0 0 0 0 0 0 0 0  
17.5420 -1.5390 -25.4940 H 0 0 0 0 0 0 0 0 0 0 0 0 0 0 0 0  
21.1580 -4.6540 -27.0460 C 0 0 0 0 0 0 0 0 0 0 0 0 0 0 0 0  
20.7250 -4.8960 -28.0230 H 0 0 0 0 0 0 0 0 0 0 0 0 0 0 0 0  
21.9500 -5.3810 -26.8340 H 0 0 0 0 0 0 0 0 0 0 0 0 0 0 0 0  
21.6560 -3.6820 -27.1160 H 0 0 0 0 0 0 0 0 0 0 0 0 0 0 0 0  
18.5920 0.0930 -26.3280 N 0 0 3 0 0 0 0 0 0 0 0 0 0 0 0 0  
19.1770 0.2790 -27.1440 H 0 0 0 0 0 0 0 0 0 0 0 0 0 0 0 0  
17.7160 1.5130 -16.7300 C 0 0 0 0 0 0 0 0 0 0 0 0 0 0 0 0  
17.6070 0.4280 -16.6130 H 0 0 0 0 0 0 0 0 0 0 0 0 0 0 0 0  
16.7300 1.9680 -16.8810 H 0 0 0 0 0 0 0 0 0 0 0 0 0 0 0 0  
18.3160 2.0720 -15.5540 O 0 0 0 0 0 0 0 0 0 0 0 0 0 0 0 0  
17.7030 1.7350 -14.3830 C 0 0 0 0 0 0 0 0 0 0 0 0 0 0 0 0  
18.4560 2.3470 -13.2260 C 0 0 0 0 0 0 0 0 0 0 0 0 0 0 0 0  
19.5230 2.2840 -13.4620 H 0 0 0 0 0 0 0 0 0 0 0 0 0 0 0 0  
18.1720 3.4010 -13.1500 H 0 0 0 0 0 0 0 0 0 0 0 0 0 0 0 0  
18.1570 1.5950 -11.9230 C 0 0 0 0 0 0 0 0 0 0 0 0 0 0 0 0  
17.0860 1.6830 -11.6890 H 0 0 0 0 0 0 0 0 0 0 0 0 0 0 0 0  
18.2990 0.5180 -12.0800 H 0 0 0 0 0 0 0 0 0 0 0 0 0 0 0 0  
16.6950 1.0510 -14.2860 O 0 0 0 0 0 0 0 0 0 0 0 0 0 0 0 0  
19.2740 0.6120 -25.1380 C 0 0 0 0 0 0 0 0 0 0 0 0 0 0 0 0  
20.2650 0.1560 -25.0310 H 0 0 0 0 0 0 0 0 0 0 0 0 0 0 0 0  
19.4600 1.6790 -25.3150 H 0 0 0 0 0 0 0 0 0 0 0 0 0 0 0 0  
18.4700 0.4630 -23.8480 C 0 0 0 0 0 0 0 0 0 0 0 0 0 0 0 0  
17.4900 0.9410 -23.9590 H 0 0 0 0 0 0 0 0 0 0 0 0 0 0 0 0  
18.3320 -0.5940 -23.5980 H 0 0 0 0 0 0 0 0 0 0 0 0 0 0 0 0  
19.1840 1.1120 -22.6890 C 0 0 0 0 0 0 0 0 0 0 0 0 0 0 0 0  
18.4390 0.9570 -21.5580 O 0 0 0 0 0 0 0 0 0 0 0 0 0 0 0 0  
19.0220 1.5280 -20.3790 C 0 0 0 0 0 0 0 0 0 0 0 0 0 0 0 0  
20.0020 1.0710 -20.1970 H 0 0 0 0 0 0 0 0 0 0 0 0 0 0 0 0  
19.1400 2.6090 -20.5180 H 0 0 0 0 0 0 0 0 0 0 0 0 0 0 0 0  
18.0870 1.2460 -19.2090 C 0 0 0 0 0 0 0 0 0 0 0 0 0 0 0 0  
17.0960 1.6650 -19.4260 H 0 0 0 0 0 0 0 0 0 0 0 0 0 0 0 0  
17.9410 0.1630 -19.1160 H 0 0 0 0 0 0 0 0 0 0 0 0 0 0 0 0  
20.2640 1.6810 -22.7510 O 0 0 0 0 0 0 0 0 0 0 0 0 0 0 0 0  
18.6310 1.8210 -17.9080 C 0 0 0 0 0 0 0 0 0 0 0 0 0 0 0 0  
18.7590 2.9070 -17.9950 H 0 0 0 0 0 0 0 0 0 0 0 0 0 0 0 0  
19.6310 1.4180 -17.7040 H 0 0 0 0 0 0 0 0 0 0 0 0 0 0 0 0  
20.2410 3.1310 -5.5800 C 0 0 0 0 0 0 0 0 0 0 0 0 0 0 0 0  
20.6480 2.1140 -5.6230 H 0 0 0 0 0 0 0 0 0 0 0 0 0 0 0 0  
20.0380 3.3780 -4.5320 H 0 0 0 0 0 0 0 0 0 0 0 0 0 0 0 0  
21.0160 3.8280 -5.9190 H 0 0 0 0 0 0 0 0 0 0 0 0 0 0 0 0  
19.0270 3.2760 -6.3890 N 0 0 0 0 0 0 0 0 0 0 0 0 0 0 0 0  
19.3310 3.0030 -7.8090 C 0 0 0 0 0 0 0 0 0 0 0 0 0 0 0 0  
20.1810 3.6310 -8.1060 H 0 0 0 0 0 0 0 0 0 0 0 0 0 0 0 0  
19.6380 1.9570 -7.9370 H 0 0 0 0 0 0 0 0 0 0 0 0 0 0 0 0  
18.1640 3.3290 -8.7520 C 0 0 0 0 0 0 0 0 0 0 0 0 0 0 0 0  
17.3430 2.6170 -8.6010 H 0 0 0 0 0 0 0 0 0 0 0 0 0 0 0 0  
17.7690 4.3220 -8.5010 H 0 0 0 0 0 0 0 0 0 0 0 0 0 0 0 0  
18.5370 3.3390 -10.2450 C 0 0 0 0 0 0 0 0 0 0 0 0 0 0 0 0  
17.6500 3.7020 -10.7810 H 0 0 0 0 0 0 0 0 0 0 0 0 0 0 0 0  
19.3150 4.0900 -10.4330 H 0 0 0 0 0 0 0 0 0 0 0 0 0 0 0 0  
17.9800 2.3910 -5.8720 C 0 0 0 0 0 0 0 0 0 0 0 0 0 0 0 0  
17.8010 2.5880 -4.8090 H 0 0 0 0 0 0 0 0 0 0 0 0 0 0 0 0  
18.2410 1.3330 -5.9850 H 0 0 0 0 0 0 0 0 0 0 0 0 0 0 0 0





|         |          |          |   |   |   |   |   |   |   |   |   |   |   |   |   |   |
|---------|----------|----------|---|---|---|---|---|---|---|---|---|---|---|---|---|---|
| 44.9240 | -3.2810  | -19.7190 | H | 0 | 0 | 0 | 0 | 0 | 0 | 0 | 0 | 0 | 0 | 0 | 0 | 0 |
| 43.4620 | -2.5240  | -20.3120 | H | 0 | 0 | 0 | 0 | 0 | 0 | 0 | 0 | 0 | 0 | 0 | 0 | 0 |
| 45.1610 | -2.3820  | -21.6410 | C | 0 | 0 | 0 | 0 | 0 | 0 | 0 | 0 | 0 | 0 | 0 | 0 | 0 |
| 44.7630 | -1.5690  | -22.2580 | H | 0 | 0 | 0 | 0 | 0 | 0 | 0 | 0 | 0 | 0 | 0 | 0 | 0 |
| 46.2500 | -2.2600  | -21.6100 | H | 0 | 0 | 0 | 0 | 0 | 0 | 0 | 0 | 0 | 0 | 0 | 0 | 0 |
| 44.8290 | -3.6660  | -22.3460 | C | 0 | 0 | 0 | 0 | 0 | 0 | 0 | 0 | 0 | 0 | 0 | 0 | 0 |
| 45.6320 | -4.6690  | -21.9010 | O | 0 | 0 | 0 | 0 | 0 | 0 | 0 | 0 | 0 | 0 | 0 | 0 | 0 |
| 45.3610 | -5.9500  | -22.4810 | C | 0 | 0 | 0 | 0 | 0 | 0 | 0 | 0 | 0 | 0 | 0 | 0 | 0 |
| 44.3010 | -6.1990  | -22.3540 | H | 0 | 0 | 0 | 0 | 0 | 0 | 0 | 0 | 0 | 0 | 0 | 0 | 0 |
| 45.6080 | -5.9240  | -23.5480 | H | 0 | 0 | 0 | 0 | 0 | 0 | 0 | 0 | 0 | 0 | 0 | 0 | 0 |
| 46.2270 | -6.9740  | -21.7600 | C | 0 | 0 | 0 | 0 | 0 | 0 | 0 | 0 | 0 | 0 | 0 | 0 | 0 |
| 47.2840 | -6.7010  | -21.8680 | H | 0 | 0 | 0 | 0 | 0 | 0 | 0 | 0 | 0 | 0 | 0 | 0 | 0 |
| 46.0150 | -6.9340  | -20.6840 | H | 0 | 0 | 0 | 0 | 0 | 0 | 0 | 0 | 0 | 0 | 0 | 0 | 0 |
| 43.9470 | -3.7810  | -23.1860 | O | 0 | 0 | 0 | 0 | 0 | 0 | 0 | 0 | 0 | 0 | 0 | 0 | 0 |
| 45.9850 | -8.3790  | -22.2940 | C | 0 | 0 | 0 | 0 | 0 | 0 | 0 | 0 | 0 | 0 | 0 | 0 | 0 |
| 46.2250 | -8.4280  | -23.3630 | H | 0 | 0 | 0 | 0 | 0 | 0 | 0 | 0 | 0 | 0 | 0 | 0 | 0 |
| 44.9220 | -8.6380  | -22.2130 | H | 0 | 0 | 0 | 0 | 0 | 0 | 0 | 0 | 0 | 0 | 0 | 0 | 0 |
| 43.5040 | -18.6120 | -25.6400 | C | 0 | 0 | 0 | 0 | 0 | 0 | 0 | 0 | 0 | 0 | 0 | 0 | 0 |
| 42.8530 | -19.4370 | -25.9520 | H | 0 | 0 | 0 | 0 | 0 | 0 | 0 | 0 | 0 | 0 | 0 | 0 | 0 |
| 44.5090 | -18.7960 | -26.0370 | H | 0 | 0 | 0 | 0 | 0 | 0 | 0 | 0 | 0 | 0 | 0 | 0 | 0 |
| 43.1050 | -17.7080 | -26.1130 | H | 0 | 0 | 0 | 0 | 0 | 0 | 0 | 0 | 0 | 0 | 0 | 0 | 0 |
| 43.5010 | -18.4760 | -24.1800 | N | 0 | 0 | 0 | 0 | 0 | 0 | 0 | 0 | 0 | 0 | 0 | 0 | 0 |
| 44.3360 | -17.3210 | -23.7810 | C | 0 | 0 | 0 | 0 | 0 | 0 | 0 | 0 | 0 | 0 | 0 | 0 | 0 |
| 45.3940 | -17.5160 | -23.9990 | H | 0 | 0 | 0 | 0 | 0 | 0 | 0 | 0 | 0 | 0 | 0 | 0 | 0 |
| 44.0400 | -16.4570 | -24.3880 | H | 0 | 0 | 0 | 0 | 0 | 0 | 0 | 0 | 0 | 0 | 0 | 0 | 0 |
| 44.1690 | -16.9330 | -22.3030 | C | 0 | 0 | 0 | 0 | 0 | 0 | 0 | 0 | 0 | 0 | 0 | 0 | 0 |
| 43.1110 | -16.7310 | -22.0910 | H | 0 | 0 | 0 | 0 | 0 | 0 | 0 | 0 | 0 | 0 | 0 | 0 | 0 |
| 44.4620 | -17.7720 | -21.6620 | H | 0 | 0 | 0 | 0 | 0 | 0 | 0 | 0 | 0 | 0 | 0 | 0 | 0 |
| 45.0180 | -15.7240 | -21.8750 | C | 0 | 0 | 0 | 0 | 0 | 0 | 0 | 0 | 0 | 0 | 0 | 0 | 0 |
| 44.9200 | -15.6280 | -20.7860 | H | 0 | 0 | 0 | 0 | 0 | 0 | 0 | 0 | 0 | 0 | 0 | 0 | 0 |
| 46.0730 | -15.9210 | -22.0940 | H | 0 | 0 | 0 | 0 | 0 | 0 | 0 | 0 | 0 | 0 | 0 | 0 | 0 |
| 43.9580 | -19.7260 | -23.5700 | C | 0 | 0 | 0 | 0 | 0 | 0 | 0 | 0 | 0 | 0 | 0 | 0 | 0 |
| 45.0050 | -19.9450 | -23.8090 | H | 0 | 0 | 0 | 0 | 0 | 0 | 0 | 0 | 0 | 0 | 0 | 0 | 0 |
| 43.3460 | -20.5680 | -23.9160 | H | 0 | 0 | 0 | 0 | 0 | 0 | 0 | 0 | 0 | 0 | 0 | 0 | 0 |
| 43.8450 | -19.7040 | -22.4820 | H | 0 | 0 | 0 | 0 | 0 | 0 | 0 | 0 | 0 | 0 | 0 | 0 | 0 |
| 44.5840 | -14.4850 | -22.5190 | N | 0 | 0 | 3 | 0 | 0 | 0 | 0 | 0 | 0 | 0 | 0 | 0 | 0 |
| 44.8380 | -14.4920 | -23.5060 | H | 0 | 0 | 0 | 0 | 0 | 0 | 0 | 0 | 0 | 0 | 0 | 0 | 0 |
| 1       | 2        | 1        | 0 | 0 | 0 | 0 |   |   |   |   |   |   |   |   |   |   |
| 1       | 3        | 1        | 0 | 0 | 0 | 0 |   |   |   |   |   |   |   |   |   |   |
| 1       | 4        | 1        | 0 | 0 | 0 | 0 |   |   |   |   |   |   |   |   |   |   |
| 1       | 5        | 1        | 0 | 0 | 0 | 0 |   |   |   |   |   |   |   |   |   |   |
| 5       | 6        | 1        | 0 | 0 | 0 | 0 |   |   |   |   |   |   |   |   |   |   |
| 5       | 15       | 1        | 0 | 0 | 0 | 0 |   |   |   |   |   |   |   |   |   |   |
| 6       | 7        | 1        | 0 | 0 | 0 | 0 |   |   |   |   |   |   |   |   |   |   |
| 6       | 8        | 1        | 0 | 0 | 0 | 0 |   |   |   |   |   |   |   |   |   |   |
| 6       | 9        | 1        | 0 | 0 | 0 | 0 |   |   |   |   |   |   |   |   |   |   |
| 9       | 10       | 1        | 0 | 0 | 0 | 0 |   |   |   |   |   |   |   |   |   |   |
| 9       | 11       | 1        | 0 | 0 | 0 | 0 |   |   |   |   |   |   |   |   |   |   |
| 9       | 12       | 1        | 0 | 0 | 0 | 0 |   |   |   |   |   |   |   |   |   |   |
| 12      | 13       | 1        | 0 | 0 | 0 | 0 |   |   |   |   |   |   |   |   |   |   |
| 12      | 14       | 1        | 0 | 0 | 0 | 0 |   |   |   |   |   |   |   |   |   |   |
| 12      | 19       | 1        | 0 | 0 | 0 | 0 |   |   |   |   |   |   |   |   |   |   |
| 15      | 16       | 1        | 0 | 0 | 0 | 0 |   |   |   |   |   |   |   |   |   |   |
| 15      | 17       | 1        | 0 | 0 | 0 | 0 |   |   |   |   |   |   |   |   |   |   |
| 15      | 18       | 1        | 0 | 0 | 0 | 0 |   |   |   |   |   |   |   |   |   |   |
| 19      | 20       | 1        | 0 | 0 | 0 | 0 |   |   |   |   |   |   |   |   |   |   |
| 19      | 33       | 1        | 0 | 0 | 0 | 0 |   |   |   |   |   |   |   |   |   |   |
| 21      | 22       | 1        | 0 | 0 | 0 | 0 |   |   |   |   |   |   |   |   |   |   |
| 21      | 23       | 1        | 0 | 0 | 0 | 0 |   |   |   |   |   |   |   |   |   |   |
| 21      | 24       | 1        | 0 | 0 | 0 | 0 |   |   |   |   |   |   |   |   |   |   |
| 21      | 48       | 1        | 0 | 0 | 0 | 0 |   |   |   |   |   |   |   |   |   |   |
| 24      | 25       | 1        | 0 | 0 | 0 | 0 |   |   |   |   |   |   |   |   |   |   |
| 25      | 26       | 1        | 0 | 0 | 0 | 0 |   |   |   |   |   |   |   |   |   |   |
| 25      | 32       | 2        | 0 | 0 | 0 | 0 |   |   |   |   |   |   |   |   |   |   |
| 26      | 27       | 1        | 0 | 0 | 0 | 0 |   |   |   |   |   |   |   |   |   |   |
| 26      | 28       | 1        | 0 | 0 | 0 | 0 |   |   |   |   |   |   |   |   |   |   |
| 26      | 29       | 1        | 0 | 0 | 0 | 0 |   |   |   |   |   |   |   |   |   |   |
| 29      | 30       | 1        | 0 | 0 | 0 | 0 |   |   |   |   |   |   |   |   |   |   |
| 29      | 31       | 1        | 0 | 0 | 0 | 0 |   |   |   |   |   |   |   |   |   |   |
| 29      | 69       | 1        | 0 | 0 | 0 | 0 |   |   |   |   |   |   |   |   |   |   |
| 33      | 34       | 1        | 0 | 0 | 0 | 0 |   |   |   |   |   |   |   |   |   |   |
| 33      | 35       | 1        | 0 | 0 | 0 | 0 |   |   |   |   |   |   |   |   |   |   |
| 33      | 36       | 1        | 0 | 0 | 0 | 0 |   |   |   |   |   |   |   |   |   |   |
| 36      | 37       | 1        | 0 | 0 | 0 | 0 |   |   |   |   |   |   |   |   |   |   |
| 36      | 38       | 1        | 0 | 0 | 0 | 0 |   |   |   |   |   |   |   |   |   |   |
| 36      | 39       | 1        | 0 | 0 | 0 | 0 |   |   |   |   |   |   |   |   |   |   |
| 39      | 40       | 1        | 0 | 0 | 0 | 0 |   |   |   |   |   |   |   |   |   |   |
| 39      | 47       | 2        | 0 | 0 | 0 | 0 |   |   |   |   |   |   |   |   |   |   |
| 40      | 41       | 1        | 0 | 0 | 0 | 0 |   |   |   |   |   |   |   |   |   |   |
| 41      | 42       | 1        | 0 | 0 | 0 | 0 |   |   |   |   |   |   |   |   |   |   |
| 41      | 43       | 1        | 0 | 0 | 0 | 0 |   |   |   |   |   |   |   |   |   |   |

|     |     |   |   |   |   |   |
|-----|-----|---|---|---|---|---|
| 41  | 44  | 1 | 0 | 0 | 0 | 0 |
| 44  | 45  | 1 | 0 | 0 | 0 | 0 |
| 44  | 46  | 1 | 0 | 0 | 0 | 0 |
| 44  | 48  | 1 | 0 | 0 | 0 | 0 |
| 48  | 49  | 1 | 0 | 0 | 0 | 0 |
| 48  | 50  | 1 | 0 | 0 | 0 | 0 |
| 51  | 52  | 1 | 0 | 0 | 0 | 0 |
| 51  | 53  | 1 | 0 | 0 | 0 | 0 |
| 51  | 54  | 1 | 0 | 0 | 0 | 0 |
| 51  | 55  | 1 | 0 | 0 | 0 | 0 |
| 55  | 56  | 1 | 0 | 0 | 0 | 0 |
| 55  | 65  | 1 | 0 | 0 | 0 | 0 |
| 56  | 57  | 1 | 0 | 0 | 0 | 0 |
| 56  | 58  | 1 | 0 | 0 | 0 | 0 |
| 56  | 59  | 1 | 0 | 0 | 0 | 0 |
| 59  | 60  | 1 | 0 | 0 | 0 | 0 |
| 59  | 61  | 1 | 0 | 0 | 0 | 0 |
| 59  | 62  | 1 | 0 | 0 | 0 | 0 |
| 62  | 63  | 1 | 0 | 0 | 0 | 0 |
| 62  | 64  | 1 | 0 | 0 | 0 | 0 |
| 62  | 69  | 1 | 0 | 0 | 0 | 0 |
| 65  | 66  | 1 | 0 | 0 | 0 | 0 |
| 65  | 67  | 1 | 0 | 0 | 0 | 0 |
| 65  | 68  | 1 | 0 | 0 | 0 | 0 |
| 69  | 82  | 1 | 0 | 0 | 0 | 0 |
| 70  | 71  | 1 | 0 | 0 | 0 | 0 |
| 70  | 72  | 1 | 0 | 0 | 0 | 0 |
| 70  | 73  | 1 | 0 | 0 | 0 | 0 |
| 70  | 97  | 1 | 0 | 0 | 0 | 0 |
| 73  | 74  | 1 | 0 | 0 | 0 | 0 |
| 74  | 75  | 1 | 0 | 0 | 0 | 0 |
| 74  | 81  | 2 | 0 | 0 | 0 | 0 |
| 75  | 76  | 1 | 0 | 0 | 0 | 0 |
| 75  | 77  | 1 | 0 | 0 | 0 | 0 |
| 75  | 78  | 1 | 0 | 0 | 0 | 0 |
| 78  | 79  | 1 | 0 | 0 | 0 | 0 |
| 78  | 80  | 1 | 0 | 0 | 0 | 0 |
| 78  | 118 | 1 | 0 | 0 | 0 | 0 |
| 82  | 83  | 1 | 0 | 0 | 0 | 0 |
| 82  | 84  | 1 | 0 | 0 | 0 | 0 |
| 82  | 85  | 1 | 0 | 0 | 0 | 0 |
| 85  | 86  | 1 | 0 | 0 | 0 | 0 |
| 85  | 87  | 1 | 0 | 0 | 0 | 0 |
| 85  | 88  | 1 | 0 | 0 | 0 | 0 |
| 88  | 89  | 1 | 0 | 0 | 0 | 0 |
| 88  | 96  | 2 | 0 | 0 | 0 | 0 |
| 89  | 90  | 1 | 0 | 0 | 0 | 0 |
| 90  | 91  | 1 | 0 | 0 | 0 | 0 |
| 90  | 92  | 1 | 0 | 0 | 0 | 0 |
| 90  | 93  | 1 | 0 | 0 | 0 | 0 |
| 93  | 94  | 1 | 0 | 0 | 0 | 0 |
| 93  | 95  | 1 | 0 | 0 | 0 | 0 |
| 93  | 97  | 1 | 0 | 0 | 0 | 0 |
| 97  | 98  | 1 | 0 | 0 | 0 | 0 |
| 97  | 99  | 1 | 0 | 0 | 0 | 0 |
| 100 | 101 | 1 | 0 | 0 | 0 | 0 |
| 100 | 102 | 1 | 0 | 0 | 0 | 0 |
| 100 | 103 | 1 | 0 | 0 | 0 | 0 |
| 100 | 104 | 1 | 0 | 0 | 0 | 0 |
| 104 | 105 | 1 | 0 | 0 | 0 | 0 |
| 104 | 114 | 1 | 0 | 0 | 0 | 0 |
| 105 | 106 | 1 | 0 | 0 | 0 | 0 |
| 105 | 107 | 1 | 0 | 0 | 0 | 0 |
| 105 | 108 | 1 | 0 | 0 | 0 | 0 |
| 108 | 109 | 1 | 0 | 0 | 0 | 0 |
| 108 | 110 | 1 | 0 | 0 | 0 | 0 |
| 108 | 111 | 1 | 0 | 0 | 0 | 0 |
| 111 | 112 | 1 | 0 | 0 | 0 | 0 |
| 111 | 113 | 1 | 0 | 0 | 0 | 0 |
| 111 | 118 | 1 | 0 | 0 | 0 | 0 |
| 114 | 115 | 1 | 0 | 0 | 0 | 0 |
| 114 | 116 | 1 | 0 | 0 | 0 | 0 |
| 114 | 117 | 1 | 0 | 0 | 0 | 0 |
| 118 | 131 | 1 | 0 | 0 | 0 | 0 |
| 119 | 120 | 1 | 0 | 0 | 0 | 0 |
| 119 | 121 | 1 | 0 | 0 | 0 | 0 |
| 119 | 122 | 1 | 0 | 0 | 0 | 0 |
| 119 | 146 | 1 | 0 | 0 | 0 | 0 |
| 122 | 123 | 1 | 0 | 0 | 0 | 0 |
| 123 | 124 | 1 | 0 | 0 | 0 | 0 |
| 123 | 130 | 2 | 0 | 0 | 0 | 0 |



|        |   |   |   |   |   |
|--------|---|---|---|---|---|
| 124125 | 1 | 0 | 0 | 0 | 0 |
| 124126 | 1 | 0 | 0 | 0 | 0 |
| 124127 | 1 | 0 | 0 | 0 | 0 |
| 127128 | 1 | 0 | 0 | 0 | 0 |
| 127129 | 1 | 0 | 0 | 0 | 0 |
| 127167 | 1 | 0 | 0 | 0 | 0 |
| 131132 | 1 | 0 | 0 | 0 | 0 |
| 131133 | 1 | 0 | 0 | 0 | 0 |
| 131134 | 1 | 0 | 0 | 0 | 0 |
| 134135 | 1 | 0 | 0 | 0 | 0 |
| 134136 | 1 | 0 | 0 | 0 | 0 |
| 134137 | 1 | 0 | 0 | 0 | 0 |
| 137138 | 1 | 0 | 0 | 0 | 0 |
| 137145 | 2 | 0 | 0 | 0 | 0 |
| 138139 | 1 | 0 | 0 | 0 | 0 |
| 139140 | 1 | 0 | 0 | 0 | 0 |
| 139141 | 1 | 0 | 0 | 0 | 0 |
| 139142 | 1 | 0 | 0 | 0 | 0 |
| 142143 | 1 | 0 | 0 | 0 | 0 |
| 142144 | 1 | 0 | 0 | 0 | 0 |
| 142146 | 1 | 0 | 0 | 0 | 0 |
| 146147 | 1 | 0 | 0 | 0 | 0 |
| 146148 | 1 | 0 | 0 | 0 | 0 |
| 149150 | 1 | 0 | 0 | 0 | 0 |
| 149151 | 1 | 0 | 0 | 0 | 0 |
| 149152 | 1 | 0 | 0 | 0 | 0 |
| 149153 | 1 | 0 | 0 | 0 | 0 |
| 153154 | 1 | 0 | 0 | 0 | 0 |
| 153163 | 1 | 0 | 0 | 0 | 0 |
| 154155 | 1 | 0 | 0 | 0 | 0 |
| 154156 | 1 | 0 | 0 | 0 | 0 |
| 154157 | 1 | 0 | 0 | 0 | 0 |
| 157158 | 1 | 0 | 0 | 0 | 0 |
| 157159 | 1 | 0 | 0 | 0 | 0 |
| 157160 | 1 | 0 | 0 | 0 | 0 |
| 160161 | 1 | 0 | 0 | 0 | 0 |
| 160162 | 1 | 0 | 0 | 0 | 0 |
| 160167 | 1 | 0 | 0 | 0 | 0 |
| 163164 | 1 | 0 | 0 | 0 | 0 |
| 163165 | 1 | 0 | 0 | 0 | 0 |
| 163166 | 1 | 0 | 0 | 0 | 0 |
| 167180 | 1 | 0 | 0 | 0 | 0 |
| 168169 | 1 | 0 | 0 | 0 | 0 |
| 168170 | 1 | 0 | 0 | 0 | 0 |
| 168171 | 1 | 0 | 0 | 0 | 0 |
| 168195 | 1 | 0 | 0 | 0 | 0 |
| 171172 | 1 | 0 | 0 | 0 | 0 |
| 172173 | 1 | 0 | 0 | 0 | 0 |
| 172179 | 2 | 0 | 0 | 0 | 0 |
| 173174 | 1 | 0 | 0 | 0 | 0 |
| 173175 | 1 | 0 | 0 | 0 | 0 |
| 173176 | 1 | 0 | 0 | 0 | 0 |
| 176177 | 1 | 0 | 0 | 0 | 0 |
| 176178 | 1 | 0 | 0 | 0 | 0 |
| 176216 | 1 | 0 | 0 | 0 | 0 |
| 180181 | 1 | 0 | 0 | 0 | 0 |
| 180182 | 1 | 0 | 0 | 0 | 0 |
| 180183 | 1 | 0 | 0 | 0 | 0 |
| 183184 | 1 | 0 | 0 | 0 | 0 |
| 183185 | 1 | 0 | 0 | 0 | 0 |
| 183186 | 1 | 0 | 0 | 0 | 0 |
| 186187 | 1 | 0 | 0 | 0 | 0 |
| 186194 | 2 | 0 | 0 | 0 | 0 |
| 187188 | 1 | 0 | 0 | 0 | 0 |
| 188189 | 1 | 0 | 0 | 0 | 0 |
| 188190 | 1 | 0 | 0 | 0 | 0 |
| 188191 | 1 | 0 | 0 | 0 | 0 |
| 191192 | 1 | 0 | 0 | 0 | 0 |
| 191193 | 1 | 0 | 0 | 0 | 0 |
| 191195 | 1 | 0 | 0 | 0 | 0 |
| 195196 | 1 | 0 | 0 | 0 | 0 |
| 195197 | 1 | 0 | 0 | 0 | 0 |
| 198199 | 1 | 0 | 0 | 0 | 0 |
| 198200 | 1 | 0 | 0 | 0 | 0 |
| 198201 | 1 | 0 | 0 | 0 | 0 |
| 198202 | 1 | 0 | 0 | 0 | 0 |
| 202203 | 1 | 0 | 0 | 0 | 0 |
| 202212 | 1 | 0 | 0 | 0 | 0 |
| 203204 | 1 | 0 | 0 | 0 | 0 |
| 203205 | 1 | 0 | 0 | 0 | 0 |
| 203206 | 1 | 0 | 0 | 0 | 0 |

```

206207 1 0 0 0 0
206208 1 0 0 0 0
206209 1 0 0 0 0
209210 1 0 0 0 0
209211 1 0 0 0 0
209216 1 0 0 0 0
212213 1 0 0 0 0
212214 1 0 0 0 0
212215 1 0 0 0 0
216229 1 0 0 0 0
217218 1 0 0 0 0
217219 1 0 0 0 0
217220 1 0 0 0 0
217244 1 0 0 0 0
220221 1 0 0 0 0
221222 1 0 0 0 0
221228 2 0 0 0 0
222223 1 0 0 0 0
222224 1 0 0 0 0
222225 1 0 0 0 0
225226 1 0 0 0 0
225227 1 0 0 0 0
225265 1 0 0 0 0
229230 1 0 0 0 0
229231 1 0 0 0 0
229232 1 0 0 0 0
232233 1 0 0 0 0
232234 1 0 0 0 0
232235 1 0 0 0 0
235236 1 0 0 0 0
235243 2 0 0 0 0
236237 1 0 0 0 0
237238 1 0 0 0 0
237239 1 0 0 0 0
237240 1 0 0 0 0
240241 1 0 0 0 0
240242 1 0 0 0 0
240244 1 0 0 0 0
244245 1 0 0 0 0
244246 1 0 0 0 0
247248 1 0 0 0 0
247249 1 0 0 0 0
247250 1 0 0 0 0
247251 1 0 0 0 0
251252 1 0 0 0 0
251261 1 0 0 0 0
252253 1 0 0 0 0
252254 1 0 0 0 0
252255 1 0 0 0 0
255256 1 0 0 0 0
255257 1 0 0 0 0
255258 1 0 0 0 0
258259 1 0 0 0 0
258260 1 0 0 0 0
258265 1 0 0 0 0
261262 1 0 0 0 0
261263 1 0 0 0 0
261264 1 0 0 0 0
265266 1 0 0 0 0

```

```

M END
> <NAME>
C80_12

```

```

$$$$
C86_12
MOE2012 3D

```

```

296295 0 0 1 0 0 0 0 0999 V2000
26.9940 -22.1380 27.7680 C 0 0 0 0 0 0 0 0 0 0 0 0 0 0 0
27.7990 -21.3930 27.7050 H 0 0 0 0 0 0 0 0 0 0 0 0 0 0 0
26.3780 -21.8290 28.6230 H 0 0 0 0 0 0 0 0 0 0 0 0 0 0 0
26.2130 -22.1420 26.5160 N 0 0 0 0 0 0 0 0 0 0 0 0 0 0 0
25.9170 -20.7480 26.1080 C 0 0 0 0 0 0 0 0 0 0 0 0 0 0 0
25.2540 -20.2700 26.8420 H 0 0 0 0 0 0 0 0 0 0 0 0 0 0 0
26.8530 -20.1740 26.1050 H 0 0 0 0 0 0 0 0 0 0 0 0 0 0 0
25.3120 -20.6310 24.6930 C 0 0 0 0 0 0 0 0 0 0 0 0 0 0 0
25.9960 -21.0980 23.9740 H 0 0 0 0 0 0 0 0 0 0 0 0 0 0 0
24.3540 -21.1610 24.6460 H 0 0 0 0 0 0 0 0 0 0 0 0 0 0 0
25.0980 -19.2220 24.3290 N 0 0 3 0 0 0 0 0 0 0 0 0 0 0 0
24.4650 -18.7910 25.0040 H 0 0 0 0 0 0 0 0 0 0 0 0 0 0 0
24.9830 -22.9470 26.6430 C 0 0 0 0 0 0 0 0 0 0 0 0 0 0 0

```









|     |     |   |   |   |   |   |
|-----|-----|---|---|---|---|---|
| 41  | 42  | 1 | 0 | 0 | 0 | 0 |
| 41  | 43  | 1 | 0 | 0 | 0 | 0 |
| 41  | 44  | 1 | 0 | 0 | 0 | 0 |
| 44  | 45  | 1 | 0 | 0 | 0 | 0 |
| 44  | 52  | 2 | 0 | 0 | 0 | 0 |
| 45  | 46  | 1 | 0 | 0 | 0 | 0 |
| 46  | 47  | 1 | 0 | 0 | 0 | 0 |
| 46  | 48  | 1 | 0 | 0 | 0 | 0 |
| 46  | 49  | 1 | 0 | 0 | 0 | 0 |
| 49  | 50  | 1 | 0 | 0 | 0 | 0 |
| 49  | 51  | 1 | 0 | 0 | 0 | 0 |
| 49  | 53  | 1 | 0 | 0 | 0 | 0 |
| 53  | 54  | 1 | 0 | 0 | 0 | 0 |
| 53  | 55  | 1 | 0 | 0 | 0 | 0 |
| 56  | 57  | 1 | 0 | 0 | 0 | 0 |
| 56  | 58  | 1 | 0 | 0 | 0 | 0 |
| 56  | 59  | 1 | 0 | 0 | 0 | 0 |
| 56  | 70  | 1 | 0 | 0 | 0 | 0 |
| 59  | 60  | 1 | 0 | 0 | 0 | 0 |
| 59  | 67  | 1 | 0 | 0 | 0 | 0 |
| 60  | 61  | 1 | 0 | 0 | 0 | 0 |
| 60  | 62  | 1 | 0 | 0 | 0 | 0 |
| 60  | 63  | 1 | 0 | 0 | 0 | 0 |
| 63  | 64  | 1 | 0 | 0 | 0 | 0 |
| 63  | 65  | 1 | 0 | 0 | 0 | 0 |
| 63  | 66  | 1 | 0 | 0 | 0 | 0 |
| 66  | 92  | 1 | 0 | 0 | 0 | 0 |
| 67  | 68  | 1 | 0 | 0 | 0 | 0 |
| 67  | 69  | 1 | 0 | 0 | 0 | 0 |
| 67  | 75  | 1 | 0 | 0 | 0 | 0 |
| 70  | 71  | 1 | 0 | 0 | 0 | 0 |
| 70  | 72  | 1 | 0 | 0 | 0 | 0 |
| 70  | 73  | 1 | 0 | 0 | 0 | 0 |
| 73  | 74  | 1 | 0 | 0 | 0 | 0 |
| 75  | 76  | 1 | 0 | 0 | 0 | 0 |
| 75  | 77  | 1 | 0 | 0 | 0 | 0 |
| 75  | 78  | 1 | 0 | 0 | 0 | 0 |
| 78  | 79  | 1 | 0 | 0 | 0 | 0 |
| 80  | 81  | 1 | 0 | 0 | 0 | 0 |
| 80  | 82  | 1 | 0 | 0 | 0 | 0 |
| 80  | 83  | 1 | 0 | 0 | 0 | 0 |
| 80  | 107 | 1 | 0 | 0 | 0 | 0 |
| 83  | 84  | 1 | 0 | 0 | 0 | 0 |
| 84  | 85  | 1 | 0 | 0 | 0 | 0 |
| 84  | 91  | 2 | 0 | 0 | 0 | 0 |
| 85  | 86  | 1 | 0 | 0 | 0 | 0 |
| 85  | 87  | 1 | 0 | 0 | 0 | 0 |
| 85  | 88  | 1 | 0 | 0 | 0 | 0 |
| 88  | 89  | 1 | 0 | 0 | 0 | 0 |
| 88  | 90  | 1 | 0 | 0 | 0 | 0 |
| 88  | 120 | 1 | 0 | 0 | 0 | 0 |
| 92  | 93  | 1 | 0 | 0 | 0 | 0 |
| 92  | 94  | 1 | 0 | 0 | 0 | 0 |
| 92  | 95  | 1 | 0 | 0 | 0 | 0 |
| 95  | 96  | 1 | 0 | 0 | 0 | 0 |
| 95  | 97  | 1 | 0 | 0 | 0 | 0 |
| 95  | 98  | 1 | 0 | 0 | 0 | 0 |
| 98  | 99  | 1 | 0 | 0 | 0 | 0 |
| 98  | 106 | 2 | 0 | 0 | 0 | 0 |
| 99  | 100 | 1 | 0 | 0 | 0 | 0 |
| 100 | 101 | 1 | 0 | 0 | 0 | 0 |
| 100 | 102 | 1 | 0 | 0 | 0 | 0 |
| 100 | 103 | 1 | 0 | 0 | 0 | 0 |
| 103 | 104 | 1 | 0 | 0 | 0 | 0 |
| 103 | 105 | 1 | 0 | 0 | 0 | 0 |
| 103 | 107 | 1 | 0 | 0 | 0 | 0 |
| 107 | 108 | 1 | 0 | 0 | 0 | 0 |
| 107 | 109 | 1 | 0 | 0 | 0 | 0 |
| 110 | 111 | 1 | 0 | 0 | 0 | 0 |
| 110 | 112 | 1 | 0 | 0 | 0 | 0 |
| 110 | 113 | 1 | 0 | 0 | 0 | 0 |
| 110 | 124 | 1 | 0 | 0 | 0 | 0 |
| 113 | 114 | 1 | 0 | 0 | 0 | 0 |
| 113 | 121 | 1 | 0 | 0 | 0 | 0 |
| 114 | 115 | 1 | 0 | 0 | 0 | 0 |
| 114 | 116 | 1 | 0 | 0 | 0 | 0 |
| 114 | 117 | 1 | 0 | 0 | 0 | 0 |
| 117 | 118 | 1 | 0 | 0 | 0 | 0 |
| 117 | 119 | 1 | 0 | 0 | 0 | 0 |
| 117 | 120 | 1 | 0 | 0 | 0 | 0 |
| 120 | 146 | 1 | 0 | 0 | 0 | 0 |

|        |   |   |   |   |   |
|--------|---|---|---|---|---|
| 121122 | 1 | 0 | 0 | 0 | 0 |
| 121123 | 1 | 0 | 0 | 0 | 0 |
| 121129 | 1 | 0 | 0 | 0 | 0 |
| 124125 | 1 | 0 | 0 | 0 | 0 |
| 124126 | 1 | 0 | 0 | 0 | 0 |
| 124127 | 1 | 0 | 0 | 0 | 0 |
| 127128 | 1 | 0 | 0 | 0 | 0 |
| 129130 | 1 | 0 | 0 | 0 | 0 |
| 129131 | 1 | 0 | 0 | 0 | 0 |
| 129132 | 1 | 0 | 0 | 0 | 0 |
| 132133 | 1 | 0 | 0 | 0 | 0 |
| 134135 | 1 | 0 | 0 | 0 | 0 |
| 134136 | 1 | 0 | 0 | 0 | 0 |
| 134137 | 1 | 0 | 0 | 0 | 0 |
| 134161 | 1 | 0 | 0 | 0 | 0 |
| 137138 | 1 | 0 | 0 | 0 | 0 |
| 138139 | 1 | 0 | 0 | 0 | 0 |
| 138145 | 2 | 0 | 0 | 0 | 0 |
| 139140 | 1 | 0 | 0 | 0 | 0 |
| 139141 | 1 | 0 | 0 | 0 | 0 |
| 139142 | 1 | 0 | 0 | 0 | 0 |
| 142143 | 1 | 0 | 0 | 0 | 0 |
| 142144 | 1 | 0 | 0 | 0 | 0 |
| 142174 | 1 | 0 | 0 | 0 | 0 |
| 146147 | 1 | 0 | 0 | 0 | 0 |
| 146148 | 1 | 0 | 0 | 0 | 0 |
| 146149 | 1 | 0 | 0 | 0 | 0 |
| 149150 | 1 | 0 | 0 | 0 | 0 |
| 149151 | 1 | 0 | 0 | 0 | 0 |
| 149152 | 1 | 0 | 0 | 0 | 0 |
| 152153 | 1 | 0 | 0 | 0 | 0 |
| 152160 | 2 | 0 | 0 | 0 | 0 |
| 153154 | 1 | 0 | 0 | 0 | 0 |
| 154155 | 1 | 0 | 0 | 0 | 0 |
| 154156 | 1 | 0 | 0 | 0 | 0 |
| 154157 | 1 | 0 | 0 | 0 | 0 |
| 157158 | 1 | 0 | 0 | 0 | 0 |
| 157159 | 1 | 0 | 0 | 0 | 0 |
| 157161 | 1 | 0 | 0 | 0 | 0 |
| 161162 | 1 | 0 | 0 | 0 | 0 |
| 161163 | 1 | 0 | 0 | 0 | 0 |
| 164165 | 1 | 0 | 0 | 0 | 0 |
| 164166 | 1 | 0 | 0 | 0 | 0 |
| 164167 | 1 | 0 | 0 | 0 | 0 |
| 164178 | 1 | 0 | 0 | 0 | 0 |
| 167168 | 1 | 0 | 0 | 0 | 0 |
| 167175 | 1 | 0 | 0 | 0 | 0 |
| 168169 | 1 | 0 | 0 | 0 | 0 |
| 168170 | 1 | 0 | 0 | 0 | 0 |
| 168171 | 1 | 0 | 0 | 0 | 0 |
| 171172 | 1 | 0 | 0 | 0 | 0 |
| 171173 | 1 | 0 | 0 | 0 | 0 |
| 171174 | 1 | 0 | 0 | 0 | 0 |
| 174200 | 1 | 0 | 0 | 0 | 0 |
| 175176 | 1 | 0 | 0 | 0 | 0 |
| 175177 | 1 | 0 | 0 | 0 | 0 |
| 175183 | 1 | 0 | 0 | 0 | 0 |
| 178179 | 1 | 0 | 0 | 0 | 0 |
| 178180 | 1 | 0 | 0 | 0 | 0 |
| 178181 | 1 | 0 | 0 | 0 | 0 |
| 181182 | 1 | 0 | 0 | 0 | 0 |
| 183184 | 1 | 0 | 0 | 0 | 0 |
| 183185 | 1 | 0 | 0 | 0 | 0 |
| 183186 | 1 | 0 | 0 | 0 | 0 |
| 186187 | 1 | 0 | 0 | 0 | 0 |
| 188189 | 1 | 0 | 0 | 0 | 0 |
| 188190 | 1 | 0 | 0 | 0 | 0 |
| 188191 | 1 | 0 | 0 | 0 | 0 |
| 188215 | 1 | 0 | 0 | 0 | 0 |
| 191192 | 1 | 0 | 0 | 0 | 0 |
| 192193 | 1 | 0 | 0 | 0 | 0 |
| 192199 | 2 | 0 | 0 | 0 | 0 |
| 193194 | 1 | 0 | 0 | 0 | 0 |
| 193195 | 1 | 0 | 0 | 0 | 0 |
| 193196 | 1 | 0 | 0 | 0 | 0 |
| 196197 | 1 | 0 | 0 | 0 | 0 |
| 196198 | 1 | 0 | 0 | 0 | 0 |
| 196228 | 1 | 0 | 0 | 0 | 0 |
| 200201 | 1 | 0 | 0 | 0 | 0 |
| 200202 | 1 | 0 | 0 | 0 | 0 |
| 200203 | 1 | 0 | 0 | 0 | 0 |



|        |   |   |   |   |   |
|--------|---|---|---|---|---|
| 203204 | 1 | 0 | 0 | 0 | 0 |
| 203205 | 1 | 0 | 0 | 0 | 0 |
| 203206 | 1 | 0 | 0 | 0 | 0 |
| 206207 | 1 | 0 | 0 | 0 | 0 |
| 206214 | 2 | 0 | 0 | 0 | 0 |
| 207208 | 1 | 0 | 0 | 0 | 0 |
| 208209 | 1 | 0 | 0 | 0 | 0 |
| 208210 | 1 | 0 | 0 | 0 | 0 |
| 208211 | 1 | 0 | 0 | 0 | 0 |
| 211212 | 1 | 0 | 0 | 0 | 0 |
| 211213 | 1 | 0 | 0 | 0 | 0 |
| 211215 | 1 | 0 | 0 | 0 | 0 |
| 215216 | 1 | 0 | 0 | 0 | 0 |
| 215217 | 1 | 0 | 0 | 0 | 0 |
| 218219 | 1 | 0 | 0 | 0 | 0 |
| 218220 | 1 | 0 | 0 | 0 | 0 |
| 218221 | 1 | 0 | 0 | 0 | 0 |
| 218232 | 1 | 0 | 0 | 0 | 0 |
| 221222 | 1 | 0 | 0 | 0 | 0 |
| 221229 | 1 | 0 | 0 | 0 | 0 |
| 222223 | 1 | 0 | 0 | 0 | 0 |
| 222224 | 1 | 0 | 0 | 0 | 0 |
| 222225 | 1 | 0 | 0 | 0 | 0 |
| 225226 | 1 | 0 | 0 | 0 | 0 |
| 225227 | 1 | 0 | 0 | 0 | 0 |
| 225228 | 1 | 0 | 0 | 0 | 0 |
| 228254 | 1 | 0 | 0 | 0 | 0 |
| 229230 | 1 | 0 | 0 | 0 | 0 |
| 229231 | 1 | 0 | 0 | 0 | 0 |
| 229237 | 1 | 0 | 0 | 0 | 0 |
| 232233 | 1 | 0 | 0 | 0 | 0 |
| 232234 | 1 | 0 | 0 | 0 | 0 |
| 232235 | 1 | 0 | 0 | 0 | 0 |
| 235236 | 1 | 0 | 0 | 0 | 0 |
| 237238 | 1 | 0 | 0 | 0 | 0 |
| 237239 | 1 | 0 | 0 | 0 | 0 |
| 237240 | 1 | 0 | 0 | 0 | 0 |
| 240241 | 1 | 0 | 0 | 0 | 0 |
| 242243 | 1 | 0 | 0 | 0 | 0 |
| 242244 | 1 | 0 | 0 | 0 | 0 |
| 242245 | 1 | 0 | 0 | 0 | 0 |
| 242269 | 1 | 0 | 0 | 0 | 0 |
| 245246 | 1 | 0 | 0 | 0 | 0 |
| 246247 | 1 | 0 | 0 | 0 | 0 |
| 246253 | 2 | 0 | 0 | 0 | 0 |
| 247248 | 1 | 0 | 0 | 0 | 0 |
| 247249 | 1 | 0 | 0 | 0 | 0 |
| 247250 | 1 | 0 | 0 | 0 | 0 |
| 250251 | 1 | 0 | 0 | 0 | 0 |
| 250252 | 1 | 0 | 0 | 0 | 0 |
| 250282 | 1 | 0 | 0 | 0 | 0 |
| 254255 | 1 | 0 | 0 | 0 | 0 |
| 254256 | 1 | 0 | 0 | 0 | 0 |
| 254257 | 1 | 0 | 0 | 0 | 0 |
| 257258 | 1 | 0 | 0 | 0 | 0 |
| 257259 | 1 | 0 | 0 | 0 | 0 |
| 257260 | 1 | 0 | 0 | 0 | 0 |
| 260261 | 1 | 0 | 0 | 0 | 0 |
| 260268 | 2 | 0 | 0 | 0 | 0 |
| 261262 | 1 | 0 | 0 | 0 | 0 |
| 262263 | 1 | 0 | 0 | 0 | 0 |
| 262264 | 1 | 0 | 0 | 0 | 0 |
| 262265 | 1 | 0 | 0 | 0 | 0 |
| 265266 | 1 | 0 | 0 | 0 | 0 |
| 265267 | 1 | 0 | 0 | 0 | 0 |
| 265269 | 1 | 0 | 0 | 0 | 0 |
| 269270 | 1 | 0 | 0 | 0 | 0 |
| 269271 | 1 | 0 | 0 | 0 | 0 |
| 272273 | 1 | 0 | 0 | 0 | 0 |
| 272274 | 1 | 0 | 0 | 0 | 0 |
| 272275 | 1 | 0 | 0 | 0 | 0 |
| 272287 | 1 | 0 | 0 | 0 | 0 |
| 275276 | 1 | 0 | 0 | 0 | 0 |
| 275284 | 1 | 0 | 0 | 0 | 0 |
| 276277 | 1 | 0 | 0 | 0 | 0 |
| 276278 | 1 | 0 | 0 | 0 | 0 |
| 276279 | 1 | 0 | 0 | 0 | 0 |
| 279280 | 1 | 0 | 0 | 0 | 0 |
| 279281 | 1 | 0 | 0 | 0 | 0 |
| 279282 | 1 | 0 | 0 | 0 | 0 |
| 282283 | 1 | 0 | 0 | 0 | 0 |

284285 1 0 0 0 0  
284286 1 0 0 0 0  
284292 1 0 0 0 0  
287288 1 0 0 0 0  
287289 1 0 0 0 0  
287290 1 0 0 0 0  
290291 1 0 0 0 0  
292293 1 0 0 0 0  
292294 1 0 0 0 0  
292295 1 0 0 0 0  
295296 1 0 0 0 0

M END  
> <NAME>  
C86\_12

\$\$\$  
D24\_12  
MOE2012 3D

385394 0 0 1 0 0 0 0 0999 V2000  
14.3580 -16.5390 -23.0440 O 0 0 0 0 0 0 0 0 0 0 0 0 0 0 0  
14.1300 -17.4740 -22.8930 H 0 0 0 0 0 0 0 0 0 0 0 0 0 0 0  
14.8450 -16.0230 -21.8020 C 0 0 0 0 0 0 0 0 0 0 0 0 0 0 0  
14.0850 -16.1690 -21.0300 H 0 0 0 0 0 0 0 0 0 0 0 0 0 0 0  
15.7480 -16.5860 -21.5440 H 0 0 0 0 0 0 0 0 0 0 0 0 0 0 0  
15.1580 -14.5410 -22.0030 C 0 0 0 3 0 0 0 0 0 0 0 0 0 0 0  
14.2470 -14.0060 -22.2990 H 0 0 0 0 0 0 0 0 0 0 0 0 0 0 0  
15.7790 -13.9130 -20.7480 C 0 0 0 0 0 0 0 0 0 0 0 0 0 0 0  
15.1030 -14.0260 -19.8930 H 0 0 0 0 0 0 0 0 0 0 0 0 0 0 0  
16.7220 -14.4270 -20.5220 H 0 0 0 0 0 0 0 0 0 0 0 0 0 0 0  
16.0430 -12.4890 -20.9950 N 0 0 0 3 0 0 0 0 0 0 0 0 0 0 0  
16.5340 -12.4260 -21.8920 H 0 0 0 0 0 0 0 0 0 0 0 0 0 0 0  
16.0830 -14.4250 -23.0960 O 0 0 0 0 0 0 0 0 0 0 0 0 0 0 0  
15.7230 -15.0280 -23.7790 H 0 0 0 0 0 0 0 0 0 0 0 0 0 0 0  
22.6540 -3.5830 -7.1230 C 0 0 0 0 0 0 0 0 0 0 0 0 0 0 0  
22.7590 -3.1350 -8.1170 H 0 0 0 0 0 0 0 0 0 0 0 0 0 0 0  
23.1870 -4.5410 -7.1740 H 0 0 0 0 0 0 0 0 0 0 0 0 0 0 0  
23.2800 -2.6880 -6.1900 O 0 0 0 0 0 0 0 0 0 0 0 0 0 0 0  
23.7350 -3.2550 -5.0350 C 0 0 0 0 0 0 0 0 0 0 0 0 0 0 0  
24.4160 -2.2080 -4.1850 C 0 0 0 0 0 0 0 0 0 0 0 0 0 0 0  
24.8670 -1.4700 -4.8520 H 0 0 0 0 0 0 0 0 0 0 0 0 0 0 0  
23.6500 -1.7040 -3.5860 H 0 0 0 0 0 0 0 0 0 0 0 0 0 0 0  
25.4780 -2.8560 -3.2900 C 0 0 0 0 0 0 0 0 0 0 0 0 0 0 0  
24.9540 -3.3970 -2.4900 H 0 0 0 0 0 0 0 0 0 0 0 0 0 0 0  
26.0110 -3.6410 -3.8420 H 0 0 0 0 0 0 0 0 0 0 0 0 0 0 0  
23.5940 -4.4290 -4.7250 O 0 0 0 0 0 0 0 0 0 0 0 0 0 0 0  
21.1820 -3.7830 -6.7820 C 0 0 0 0 0 0 0 0 0 0 0 0 0 0 0  
21.1040 -4.2430 -5.7900 H 0 0 0 0 0 0 0 0 0 0 0 0 0 0 0  
20.6420 -2.8340 -6.6870 H 0 0 0 0 0 0 0 0 0 0 0 0 0 0 0  
16.8500 -11.8960 -19.9280 C 0 0 0 0 0 0 0 0 0 0 0 0 0 0 0  
16.3280 -11.9890 -18.9680 H 0 0 0 0 0 0 0 0 0 0 0 0 0 0 0  
17.8090 -12.4220 -19.8370 H 0 0 0 0 0 0 0 0 0 0 0 0 0 0 0  
17.0990 -10.4230 -20.2370 C 0 0 0 0 0 0 0 0 0 0 0 0 0 0 0  
17.6100 -10.3280 -21.2030 H 0 0 0 0 0 0 0 0 0 0 0 0 0 0 0  
16.1510 -9.8750 -20.2800 H 0 0 0 0 0 0 0 0 0 0 0 0 0 0 0  
17.9660 -9.7840 -19.1830 C 0 0 0 0 0 0 0 0 0 0 0 0 0 0 0  
18.3390 -8.5390 -19.5990 O 0 0 0 0 0 0 0 0 0 0 0 0 0 0 0  
19.2240 -7.8240 -18.7250 C 0 0 0 0 0 0 0 0 0 0 0 0 0 0 0  
19.9940 -8.4870 -18.3100 H 0 0 0 0 0 0 0 0 0 0 0 0 0 0 0  
19.7630 -7.0910 -19.3360 H 0 0 0 0 0 0 0 0 0 0 0 0 0 0 0  
18.4530 -7.1070 -17.6230 C 0 0 0 0 0 0 0 0 0 0 0 0 0 0 0  
17.7070 -6.4450 -18.0800 H 0 0 0 0 0 0 0 0 0 0 0 0 0 0 0  
17.9350 -7.8400 -16.9940 H 0 0 0 0 0 0 0 0 0 0 0 0 0 0 0  
18.2760 -10.2880 -18.1130 O 0 0 0 0 0 0 0 0 0 0 0 0 0 0 0  
19.3880 -6.3580 -16.8490 O 0 0 0 0 0 0 0 0 0 0 0 0 0 0 0  
18.8920 -5.6130 -15.8150 C 0 0 0 0 0 0 0 0 0 0 0 0 0 0 0  
19.8480 -4.8830 -15.1100 C 0 0 0 0 0 0 0 0 0 0 0 0 0 0 0  
20.8940 -4.9390 -15.4020 H 0 0 0 0 0 0 0 0 0 0 0 0 0 0 0  
19.4750 -4.0750 -14.0330 C 0 0 0 0 0 0 0 0 0 0 0 0 0 0 0  
20.2520 -3.5220 -13.5080 H 0 0 0 0 0 0 0 0 0 0 0 0 0 0 0  
18.1310 -3.9750 -13.6260 C 0 0 0 0 0 0 0 0 0 0 0 0 0 0 0  
17.1820 -4.7180 -14.3460 C 0 0 0 0 0 0 0 0 0 0 0 0 0 0 0  
16.1260 -4.6860 -14.0910 H 0 0 0 0 0 0 0 0 0 0 0 0 0 0 0  
17.5570 -5.5290 -15.4270 C 0 0 0 0 0 0 0 0 0 0 0 0 0 0 0  
16.7760 -6.0780 -15.9410 H 0 0 0 0 0 0 0 0 0 0 0 0 0 0 0  
17.7560 -3.0580 -12.4380 C 0 0 0 0 0 0 0 0 0 0 0 0 0 0 0  
18.5560 -3.4350 -11.1680 C 0 0 0 0 0 0 0 0 0 0 0 0 0 0 0  
17.9960 -1.6000 -12.9160 C 0 0 0 0 0 0 0 0 0 0 0 0 0 0 0  
19.0530 -1.4000 -13.1270 H 0 0 0 0 0 0 0 0 0 0 0 0 0 0 0  
17.6660 -0.8690 -12.1680 H 0 0 0 0 0 0 0 0 0 0 0 0 0 0 0  
17.4380 -1.3900 -13.8370 H 0 0 0 0 0 0 0 0 0 0 0 0 0 0 0









|    |    |   |   |   |   |   |
|----|----|---|---|---|---|---|
| 1  | 2  | 1 | 0 | 0 | 0 | 0 |
| 1  | 3  | 1 | 0 | 0 | 0 | 0 |
| 3  | 4  | 1 | 0 | 0 | 0 | 0 |
| 3  | 5  | 1 | 0 | 0 | 0 | 0 |
| 3  | 6  | 1 | 0 | 0 | 0 | 0 |
| 6  | 7  | 1 | 0 | 0 | 0 | 0 |
| 6  | 8  | 1 | 0 | 0 | 0 | 0 |
| 6  | 13 | 1 | 0 | 0 | 0 | 0 |
| 8  | 9  | 1 | 0 | 0 | 0 | 0 |
| 8  | 10 | 1 | 0 | 0 | 0 | 0 |
| 8  | 11 | 1 | 0 | 0 | 0 | 0 |
| 11 | 12 | 1 | 0 | 0 | 0 | 0 |
| 11 | 30 | 1 | 0 | 0 | 0 | 0 |
| 13 | 14 | 1 | 0 | 0 | 0 | 0 |
| 15 | 16 | 1 | 0 | 0 | 0 | 0 |
| 15 | 17 | 1 | 0 | 0 | 0 | 0 |
| 15 | 18 | 1 | 0 | 0 | 0 | 0 |
| 15 | 27 | 1 | 0 | 0 | 0 | 0 |
| 18 | 19 | 1 | 0 | 0 | 0 | 0 |
| 19 | 20 | 1 | 0 | 0 | 0 | 0 |
| 19 | 26 | 2 | 0 | 0 | 0 | 0 |
| 20 | 21 | 1 | 0 | 0 | 0 | 0 |
| 20 | 22 | 1 | 0 | 0 | 0 | 0 |
| 20 | 23 | 1 | 0 | 0 | 0 | 0 |
| 23 | 24 | 1 | 0 | 0 | 0 | 0 |
| 23 | 25 | 1 | 0 | 0 | 0 | 0 |
| 23 | 86 | 1 | 0 | 0 | 0 | 0 |
| 27 | 28 | 1 | 0 | 0 | 0 | 0 |
| 27 | 29 | 1 | 0 | 0 | 0 | 0 |
| 27 | 75 | 1 | 0 | 0 | 0 | 0 |
| 30 | 31 | 1 | 0 | 0 | 0 | 0 |
| 30 | 32 | 1 | 0 | 0 | 0 | 0 |
| 30 | 33 | 1 | 0 | 0 | 0 | 0 |
| 33 | 34 | 1 | 0 | 0 | 0 | 0 |
| 33 | 35 | 1 | 0 | 0 | 0 | 0 |
| 33 | 36 | 1 | 0 | 0 | 0 | 0 |
| 36 | 37 | 1 | 0 | 0 | 0 | 0 |
| 36 | 44 | 2 | 0 | 0 | 0 | 0 |
| 37 | 38 | 1 | 0 | 0 | 0 | 0 |
| 38 | 39 | 1 | 0 | 0 | 0 | 0 |
| 38 | 40 | 1 | 0 | 0 | 0 | 0 |
| 38 | 41 | 1 | 0 | 0 | 0 | 0 |
| 41 | 42 | 1 | 0 | 0 | 0 | 0 |
| 41 | 43 | 1 | 0 | 0 | 0 | 0 |
| 41 | 45 | 1 | 0 | 0 | 0 | 0 |
| 45 | 46 | 1 | 0 | 0 | 0 | 0 |
| 46 | 47 | 1 | 0 | 0 | 0 | 0 |
| 46 | 54 | 2 | 0 | 0 | 0 | 0 |
| 47 | 48 | 1 | 0 | 0 | 0 | 0 |
| 47 | 49 | 2 | 0 | 0 | 0 | 0 |
| 49 | 50 | 1 | 0 | 0 | 0 | 0 |
| 49 | 51 | 1 | 0 | 0 | 0 | 0 |
| 51 | 52 | 2 | 0 | 0 | 0 | 0 |
| 51 | 56 | 1 | 0 | 0 | 0 | 0 |
| 52 | 53 | 1 | 0 | 0 | 0 | 0 |
| 52 | 54 | 1 | 0 | 0 | 0 | 0 |
| 54 | 55 | 1 | 0 | 0 | 0 | 0 |
| 56 | 57 | 1 | 0 | 0 | 0 | 0 |
| 56 | 58 | 1 | 0 | 0 | 0 | 0 |
| 56 | 62 | 1 | 0 | 0 | 0 | 0 |
| 57 | 66 | 1 | 0 | 0 | 0 | 0 |
| 57 | 73 | 2 | 0 | 0 | 0 | 0 |
| 58 | 59 | 1 | 0 | 0 | 0 | 0 |
| 58 | 60 | 1 | 0 | 0 | 0 | 0 |
| 58 | 61 | 1 | 0 | 0 | 0 | 0 |
| 62 | 63 | 1 | 0 | 0 | 0 | 0 |
| 62 | 64 | 1 | 0 | 0 | 0 | 0 |
| 62 | 65 | 1 | 0 | 0 | 0 | 0 |
| 66 | 67 | 1 | 0 | 0 | 0 | 0 |
| 66 | 68 | 2 | 0 | 0 | 0 | 0 |
| 68 | 69 | 1 | 0 | 0 | 0 | 0 |
| 68 | 70 | 1 | 0 | 0 | 0 | 0 |
| 70 | 71 | 2 | 0 | 0 | 0 | 0 |
| 70 | 75 | 1 | 0 | 0 | 0 | 0 |
| 71 | 72 | 1 | 0 | 0 | 0 | 0 |
| 71 | 73 | 1 | 0 | 0 | 0 | 0 |
| 73 | 74 | 1 | 0 | 0 | 0 | 0 |
| 76 | 77 | 1 | 0 | 0 | 0 | 0 |
| 76 | 78 | 1 | 0 | 0 | 0 | 0 |
| 78 | 79 | 1 | 0 | 0 | 0 | 0 |
| 78 | 80 | 1 | 0 | 0 | 0 | 0 |

|     |     |   |   |   |   |   |
|-----|-----|---|---|---|---|---|
| 78  | 81  | 1 | 0 | 0 | 0 | 0 |
| 81  | 82  | 1 | 0 | 0 | 0 | 0 |
| 81  | 83  | 1 | 0 | 0 | 0 | 0 |
| 81  | 87  | 1 | 0 | 0 | 0 | 0 |
| 83  | 84  | 1 | 0 | 0 | 0 | 0 |
| 83  | 85  | 1 | 0 | 0 | 0 | 0 |
| 83  | 86  | 1 | 0 | 0 | 0 | 0 |
| 86  | 104 | 1 | 0 | 0 | 0 | 0 |
| 87  | 88  | 1 | 0 | 0 | 0 | 0 |
| 89  | 90  | 1 | 0 | 0 | 0 | 0 |
| 89  | 91  | 1 | 0 | 0 | 0 | 0 |
| 89  | 92  | 1 | 0 | 0 | 0 | 0 |
| 89  | 101 | 1 | 0 | 0 | 0 | 0 |
| 92  | 93  | 1 | 0 | 0 | 0 | 0 |
| 93  | 94  | 1 | 0 | 0 | 0 | 0 |
| 93  | 100 | 2 | 0 | 0 | 0 | 0 |
| 94  | 95  | 1 | 0 | 0 | 0 | 0 |
| 94  | 96  | 1 | 0 | 0 | 0 | 0 |
| 94  | 97  | 1 | 0 | 0 | 0 | 0 |
| 97  | 98  | 1 | 0 | 0 | 0 | 0 |
| 97  | 99  | 1 | 0 | 0 | 0 | 0 |
| 97  | 160 | 1 | 0 | 0 | 0 | 0 |
| 101 | 102 | 1 | 0 | 0 | 0 | 0 |
| 101 | 103 | 1 | 0 | 0 | 0 | 0 |
| 101 | 149 | 1 | 0 | 0 | 0 | 0 |
| 104 | 105 | 1 | 0 | 0 | 0 | 0 |
| 104 | 106 | 1 | 0 | 0 | 0 | 0 |
| 104 | 107 | 1 | 0 | 0 | 0 | 0 |
| 107 | 108 | 1 | 0 | 0 | 0 | 0 |
| 107 | 109 | 1 | 0 | 0 | 0 | 0 |
| 107 | 110 | 1 | 0 | 0 | 0 | 0 |
| 110 | 111 | 1 | 0 | 0 | 0 | 0 |
| 110 | 118 | 2 | 0 | 0 | 0 | 0 |
| 111 | 112 | 1 | 0 | 0 | 0 | 0 |
| 112 | 113 | 1 | 0 | 0 | 0 | 0 |
| 112 | 114 | 1 | 0 | 0 | 0 | 0 |
| 112 | 115 | 1 | 0 | 0 | 0 | 0 |
| 115 | 116 | 1 | 0 | 0 | 0 | 0 |
| 115 | 117 | 1 | 0 | 0 | 0 | 0 |
| 115 | 119 | 1 | 0 | 0 | 0 | 0 |
| 119 | 120 | 1 | 0 | 0 | 0 | 0 |
| 120 | 121 | 1 | 0 | 0 | 0 | 0 |
| 120 | 128 | 2 | 0 | 0 | 0 | 0 |
| 121 | 122 | 1 | 0 | 0 | 0 | 0 |
| 121 | 123 | 2 | 0 | 0 | 0 | 0 |
| 123 | 124 | 1 | 0 | 0 | 0 | 0 |
| 123 | 125 | 1 | 0 | 0 | 0 | 0 |
| 125 | 126 | 2 | 0 | 0 | 0 | 0 |
| 125 | 130 | 1 | 0 | 0 | 0 | 0 |
| 126 | 127 | 1 | 0 | 0 | 0 | 0 |
| 126 | 128 | 1 | 0 | 0 | 0 | 0 |
| 128 | 129 | 1 | 0 | 0 | 0 | 0 |
| 130 | 131 | 1 | 0 | 0 | 0 | 0 |
| 130 | 132 | 1 | 0 | 0 | 0 | 0 |
| 130 | 136 | 1 | 0 | 0 | 0 | 0 |
| 131 | 140 | 1 | 0 | 0 | 0 | 0 |
| 131 | 147 | 2 | 0 | 0 | 0 | 0 |
| 132 | 133 | 1 | 0 | 0 | 0 | 0 |
| 132 | 134 | 1 | 0 | 0 | 0 | 0 |
| 132 | 135 | 1 | 0 | 0 | 0 | 0 |
| 136 | 137 | 1 | 0 | 0 | 0 | 0 |
| 136 | 138 | 1 | 0 | 0 | 0 | 0 |
| 136 | 139 | 1 | 0 | 0 | 0 | 0 |
| 140 | 141 | 1 | 0 | 0 | 0 | 0 |
| 140 | 142 | 2 | 0 | 0 | 0 | 0 |
| 142 | 143 | 1 | 0 | 0 | 0 | 0 |
| 142 | 144 | 1 | 0 | 0 | 0 | 0 |
| 144 | 145 | 2 | 0 | 0 | 0 | 0 |
| 144 | 149 | 1 | 0 | 0 | 0 | 0 |
| 145 | 146 | 1 | 0 | 0 | 0 | 0 |
| 145 | 147 | 1 | 0 | 0 | 0 | 0 |
| 147 | 148 | 1 | 0 | 0 | 0 | 0 |
| 150 | 151 | 1 | 0 | 0 | 0 | 0 |
| 150 | 152 | 1 | 0 | 0 | 0 | 0 |
| 152 | 153 | 1 | 0 | 0 | 0 | 0 |
| 152 | 154 | 1 | 0 | 0 | 0 | 0 |
| 152 | 155 | 1 | 0 | 0 | 0 | 0 |
| 155 | 156 | 1 | 0 | 0 | 0 | 0 |
| 155 | 157 | 1 | 0 | 0 | 0 | 0 |
| 155 | 161 | 1 | 0 | 0 | 0 | 0 |
| 157 | 158 | 1 | 0 | 0 | 0 | 0 |



|        |   |   |   |   |   |
|--------|---|---|---|---|---|
| 157159 | 1 | 0 | 0 | 0 | 0 |
| 157160 | 1 | 0 | 0 | 0 | 0 |
| 160178 | 1 | 0 | 0 | 0 | 0 |
| 161162 | 1 | 0 | 0 | 0 | 0 |
| 163164 | 1 | 0 | 0 | 0 | 0 |
| 163165 | 1 | 0 | 0 | 0 | 0 |
| 163166 | 1 | 0 | 0 | 0 | 0 |
| 163175 | 1 | 0 | 0 | 0 | 0 |
| 166167 | 1 | 0 | 0 | 0 | 0 |
| 167168 | 1 | 0 | 0 | 0 | 0 |
| 167174 | 2 | 0 | 0 | 0 | 0 |
| 168169 | 1 | 0 | 0 | 0 | 0 |
| 168170 | 1 | 0 | 0 | 0 | 0 |
| 168171 | 1 | 0 | 0 | 0 | 0 |
| 171172 | 1 | 0 | 0 | 0 | 0 |
| 171173 | 1 | 0 | 0 | 0 | 0 |
| 171234 | 1 | 0 | 0 | 0 | 0 |
| 175176 | 1 | 0 | 0 | 0 | 0 |
| 175177 | 1 | 0 | 0 | 0 | 0 |
| 175223 | 1 | 0 | 0 | 0 | 0 |
| 178179 | 1 | 0 | 0 | 0 | 0 |
| 178180 | 1 | 0 | 0 | 0 | 0 |
| 178181 | 1 | 0 | 0 | 0 | 0 |
| 181182 | 1 | 0 | 0 | 0 | 0 |
| 181183 | 1 | 0 | 0 | 0 | 0 |
| 181184 | 1 | 0 | 0 | 0 | 0 |
| 184185 | 1 | 0 | 0 | 0 | 0 |
| 184192 | 2 | 0 | 0 | 0 | 0 |
| 185186 | 1 | 0 | 0 | 0 | 0 |
| 186187 | 1 | 0 | 0 | 0 | 0 |
| 186188 | 1 | 0 | 0 | 0 | 0 |
| 186189 | 1 | 0 | 0 | 0 | 0 |
| 189190 | 1 | 0 | 0 | 0 | 0 |
| 189191 | 1 | 0 | 0 | 0 | 0 |
| 189193 | 1 | 0 | 0 | 0 | 0 |
| 193194 | 1 | 0 | 0 | 0 | 0 |
| 194195 | 1 | 0 | 0 | 0 | 0 |
| 194202 | 2 | 0 | 0 | 0 | 0 |
| 195196 | 1 | 0 | 0 | 0 | 0 |
| 195197 | 2 | 0 | 0 | 0 | 0 |
| 197198 | 1 | 0 | 0 | 0 | 0 |
| 197199 | 1 | 0 | 0 | 0 | 0 |
| 199200 | 2 | 0 | 0 | 0 | 0 |
| 199204 | 1 | 0 | 0 | 0 | 0 |
| 200201 | 1 | 0 | 0 | 0 | 0 |
| 200202 | 1 | 0 | 0 | 0 | 0 |
| 202203 | 1 | 0 | 0 | 0 | 0 |
| 204205 | 1 | 0 | 0 | 0 | 0 |
| 204206 | 1 | 0 | 0 | 0 | 0 |
| 204210 | 1 | 0 | 0 | 0 | 0 |
| 205214 | 1 | 0 | 0 | 0 | 0 |
| 205221 | 2 | 0 | 0 | 0 | 0 |
| 206207 | 1 | 0 | 0 | 0 | 0 |
| 206208 | 1 | 0 | 0 | 0 | 0 |
| 206209 | 1 | 0 | 0 | 0 | 0 |
| 210211 | 1 | 0 | 0 | 0 | 0 |
| 210212 | 1 | 0 | 0 | 0 | 0 |
| 210213 | 1 | 0 | 0 | 0 | 0 |
| 214215 | 1 | 0 | 0 | 0 | 0 |
| 214216 | 2 | 0 | 0 | 0 | 0 |
| 216217 | 1 | 0 | 0 | 0 | 0 |
| 216218 | 1 | 0 | 0 | 0 | 0 |
| 218219 | 2 | 0 | 0 | 0 | 0 |
| 218223 | 1 | 0 | 0 | 0 | 0 |
| 219220 | 1 | 0 | 0 | 0 | 0 |
| 219221 | 1 | 0 | 0 | 0 | 0 |
| 221222 | 1 | 0 | 0 | 0 | 0 |
| 224225 | 1 | 0 | 0 | 0 | 0 |
| 224226 | 1 | 0 | 0 | 0 | 0 |
| 226227 | 1 | 0 | 0 | 0 | 0 |
| 226228 | 1 | 0 | 0 | 0 | 0 |
| 226229 | 1 | 0 | 0 | 0 | 0 |
| 229230 | 1 | 0 | 0 | 0 | 0 |
| 229231 | 1 | 0 | 0 | 0 | 0 |
| 229235 | 1 | 0 | 0 | 0 | 0 |
| 231232 | 1 | 0 | 0 | 0 | 0 |
| 231233 | 1 | 0 | 0 | 0 | 0 |
| 231234 | 1 | 0 | 0 | 0 | 0 |
| 234252 | 1 | 0 | 0 | 0 | 0 |
| 235236 | 1 | 0 | 0 | 0 | 0 |
| 237238 | 1 | 0 | 0 | 0 | 0 |

|        |   |   |   |   |   |
|--------|---|---|---|---|---|
| 237239 | 1 | 0 | 0 | 0 | 0 |
| 237240 | 1 | 0 | 0 | 0 | 0 |
| 237249 | 1 | 0 | 0 | 0 | 0 |
| 240241 | 1 | 0 | 0 | 0 | 0 |
| 241242 | 1 | 0 | 0 | 0 | 0 |
| 241248 | 2 | 0 | 0 | 0 | 0 |
| 242243 | 1 | 0 | 0 | 0 | 0 |
| 242244 | 1 | 0 | 0 | 0 | 0 |
| 242245 | 1 | 0 | 0 | 0 | 0 |
| 245246 | 1 | 0 | 0 | 0 | 0 |
| 245247 | 1 | 0 | 0 | 0 | 0 |
| 245308 | 1 | 0 | 0 | 0 | 0 |
| 249250 | 1 | 0 | 0 | 0 | 0 |
| 249251 | 1 | 0 | 0 | 0 | 0 |
| 249297 | 1 | 0 | 0 | 0 | 0 |
| 252253 | 1 | 0 | 0 | 0 | 0 |
| 252254 | 1 | 0 | 0 | 0 | 0 |
| 252255 | 1 | 0 | 0 | 0 | 0 |
| 255256 | 1 | 0 | 0 | 0 | 0 |
| 255257 | 1 | 0 | 0 | 0 | 0 |
| 255258 | 1 | 0 | 0 | 0 | 0 |
| 258259 | 1 | 0 | 0 | 0 | 0 |
| 258266 | 2 | 0 | 0 | 0 | 0 |
| 259260 | 1 | 0 | 0 | 0 | 0 |
| 260261 | 1 | 0 | 0 | 0 | 0 |
| 260262 | 1 | 0 | 0 | 0 | 0 |
| 260263 | 1 | 0 | 0 | 0 | 0 |
| 263264 | 1 | 0 | 0 | 0 | 0 |
| 263265 | 1 | 0 | 0 | 0 | 0 |
| 263267 | 1 | 0 | 0 | 0 | 0 |
| 267268 | 1 | 0 | 0 | 0 | 0 |
| 268269 | 1 | 0 | 0 | 0 | 0 |
| 268276 | 2 | 0 | 0 | 0 | 0 |
| 269270 | 1 | 0 | 0 | 0 | 0 |
| 269271 | 2 | 0 | 0 | 0 | 0 |
| 271272 | 1 | 0 | 0 | 0 | 0 |
| 271273 | 1 | 0 | 0 | 0 | 0 |
| 273274 | 2 | 0 | 0 | 0 | 0 |
| 273278 | 1 | 0 | 0 | 0 | 0 |
| 274275 | 1 | 0 | 0 | 0 | 0 |
| 274276 | 1 | 0 | 0 | 0 | 0 |
| 276277 | 1 | 0 | 0 | 0 | 0 |
| 278279 | 1 | 0 | 0 | 0 | 0 |
| 278280 | 1 | 0 | 0 | 0 | 0 |
| 278284 | 1 | 0 | 0 | 0 | 0 |
| 279288 | 1 | 0 | 0 | 0 | 0 |
| 279295 | 2 | 0 | 0 | 0 | 0 |
| 280281 | 1 | 0 | 0 | 0 | 0 |
| 280282 | 1 | 0 | 0 | 0 | 0 |
| 280283 | 1 | 0 | 0 | 0 | 0 |
| 284285 | 1 | 0 | 0 | 0 | 0 |
| 284286 | 1 | 0 | 0 | 0 | 0 |
| 284287 | 1 | 0 | 0 | 0 | 0 |
| 288289 | 1 | 0 | 0 | 0 | 0 |
| 288290 | 2 | 0 | 0 | 0 | 0 |
| 290291 | 1 | 0 | 0 | 0 | 0 |
| 290292 | 1 | 0 | 0 | 0 | 0 |
| 292293 | 2 | 0 | 0 | 0 | 0 |
| 292297 | 1 | 0 | 0 | 0 | 0 |
| 293294 | 1 | 0 | 0 | 0 | 0 |
| 293295 | 1 | 0 | 0 | 0 | 0 |
| 295296 | 1 | 0 | 0 | 0 | 0 |
| 298299 | 1 | 0 | 0 | 0 | 0 |
| 298300 | 1 | 0 | 0 | 0 | 0 |
| 300301 | 1 | 0 | 0 | 0 | 0 |
| 300302 | 1 | 0 | 0 | 0 | 0 |
| 300303 | 1 | 0 | 0 | 0 | 0 |
| 303304 | 1 | 0 | 0 | 0 | 0 |
| 303305 | 1 | 0 | 0 | 0 | 0 |
| 303309 | 1 | 0 | 0 | 0 | 0 |
| 305306 | 1 | 0 | 0 | 0 | 0 |
| 305307 | 1 | 0 | 0 | 0 | 0 |
| 305308 | 1 | 0 | 0 | 0 | 0 |
| 308326 | 1 | 0 | 0 | 0 | 0 |
| 309310 | 1 | 0 | 0 | 0 | 0 |
| 311312 | 1 | 0 | 0 | 0 | 0 |
| 311313 | 1 | 0 | 0 | 0 | 0 |
| 311314 | 1 | 0 | 0 | 0 | 0 |
| 311323 | 1 | 0 | 0 | 0 | 0 |
| 314315 | 1 | 0 | 0 | 0 | 0 |
| 315316 | 1 | 0 | 0 | 0 | 0 |

315322 2 0 0 0 0  
316317 1 0 0 0 0  
316318 1 0 0 0 0  
316319 1 0 0 0 0  
319320 1 0 0 0 0  
319321 1 0 0 0 0  
319382 1 0 0 0 0  
323324 1 0 0 0 0  
323325 1 0 0 0 0  
323371 1 0 0 0 0  
326327 1 0 0 0 0  
326328 1 0 0 0 0  
326329 1 0 0 0 0  
329330 1 0 0 0 0  
329331 1 0 0 0 0  
329332 1 0 0 0 0  
332333 1 0 0 0 0  
332340 2 0 0 0 0  
333334 1 0 0 0 0  
334335 1 0 0 0 0  
334336 1 0 0 0 0  
334337 1 0 0 0 0  
337338 1 0 0 0 0  
337339 1 0 0 0 0  
337341 1 0 0 0 0  
341342 1 0 0 0 0  
342343 1 0 0 0 0  
342350 2 0 0 0 0  
343344 1 0 0 0 0  
343345 2 0 0 0 0  
345346 1 0 0 0 0  
345347 1 0 0 0 0  
347348 2 0 0 0 0  
347352 1 0 0 0 0  
348349 1 0 0 0 0  
348350 1 0 0 0 0  
350351 1 0 0 0 0  
352353 1 0 0 0 0  
352354 1 0 0 0 0  
352358 1 0 0 0 0  
353362 1 0 0 0 0  
353369 2 0 0 0 0  
354355 1 0 0 0 0  
354356 1 0 0 0 0  
354357 1 0 0 0 0  
358359 1 0 0 0 0  
358360 1 0 0 0 0  
358361 1 0 0 0 0  
362363 1 0 0 0 0  
362364 2 0 0 0 0  
364365 1 0 0 0 0  
364366 1 0 0 0 0  
366367 2 0 0 0 0  
366371 1 0 0 0 0  
367368 1 0 0 0 0  
367369 1 0 0 0 0  
369370 1 0 0 0 0  
372373 1 0 0 0 0  
372374 1 0 0 0 0  
374375 1 0 0 0 0  
374376 1 0 0 0 0  
374377 1 0 0 0 0  
377378 1 0 0 0 0  
377379 1 0 0 0 0  
377384 1 0 0 0 0  
379380 1 0 0 0 0  
379381 1 0 0 0 0  
379382 1 0 0 0 0  
382383 1 0 0 0 0  
384385 1 0 0 0 0

M END  
> <NAME>  
D24\_12

\$\$\$\$  
D25\_12  
MOE2012 3D

385394 0 0 1 0 0 0 0 0999 V2000  
37.9670 22.6400 -12.7110 O 0 0 0 0 0 0 0 0 0 0 0 0 0 0 0  
38.6200 23.3480 -12.8660 H 0 0 0 0 0 0 0 0 0 0 0 0 0 0 0







|          |         |          |   |   |   |   |   |   |   |   |   |   |   |   |   |   |
|----------|---------|----------|---|---|---|---|---|---|---|---|---|---|---|---|---|---|
| 88.2830  | 6.1850  | -17.5090 | H | 0 | 0 | 0 | 0 | 0 | 0 | 0 | 0 | 0 | 0 | 0 | 0 | 0 |
| 87.4110  | 4.7210  | -17.4030 | H | 0 | 0 | 0 | 0 | 0 | 0 | 0 | 0 | 0 | 0 | 0 | 0 | 0 |
| 85.5140  | 6.4820  | -17.8190 | O | 0 | 0 | 0 | 0 | 0 | 0 | 0 | 0 | 0 | 0 | 0 | 0 | 0 |
| 82.9140  | 5.3460  | -19.3660 | C | 0 | 0 | 0 | 0 | 0 | 0 | 0 | 0 | 0 | 0 | 0 | 0 | 0 |
| 83.0530  | 4.5270  | -20.0830 | H | 0 | 0 | 0 | 0 | 0 | 0 | 0 | 0 | 0 | 0 | 0 | 0 | 0 |
| 83.2890  | 5.0230  | -18.3870 | H | 0 | 0 | 0 | 0 | 0 | 0 | 0 | 0 | 0 | 0 | 0 | 0 | 0 |
| 67.7760  | 5.3260  | -14.6190 | C | 0 | 0 | 0 | 0 | 0 | 0 | 0 | 0 | 0 | 0 | 0 | 0 | 0 |
| 68.4460  | 5.0110  | -15.4300 | H | 0 | 0 | 0 | 0 | 0 | 0 | 0 | 0 | 0 | 0 | 0 | 0 | 0 |
| 67.7390  | 6.4220  | -14.6620 | H | 0 | 0 | 0 | 0 | 0 | 0 | 0 | 0 | 0 | 0 | 0 | 0 | 0 |
| 68.4320  | 4.8720  | -13.3120 | C | 0 | 0 | 0 | 0 | 0 | 0 | 0 | 0 | 0 | 0 | 0 | 0 | 0 |
| 67.9820  | 5.3480  | -12.4360 | H | 0 | 0 | 0 | 0 | 0 | 0 | 0 | 0 | 0 | 0 | 0 | 0 | 0 |
| 68.3300  | 3.7840  | -13.2140 | H | 0 | 0 | 0 | 0 | 0 | 0 | 0 | 0 | 0 | 0 | 0 | 0 | 0 |
| 69.9000  | 5.2220  | -13.3330 | C | 0 | 0 | 0 | 0 | 0 | 0 | 0 | 0 | 0 | 0 | 0 | 0 | 0 |
| 70.6120  | 4.2840  | -12.6480 | O | 0 | 0 | 0 | 0 | 0 | 0 | 0 | 0 | 0 | 0 | 0 | 0 | 0 |
| 72.0360  | 4.4640  | -12.6400 | C | 0 | 0 | 0 | 0 | 0 | 0 | 0 | 0 | 0 | 0 | 0 | 0 | 0 |
| 72.3050  | 5.5110  | -12.4550 | H | 0 | 0 | 0 | 0 | 0 | 0 | 0 | 0 | 0 | 0 | 0 | 0 | 0 |
| 72.4310  | 3.8980  | -11.7890 | H | 0 | 0 | 0 | 0 | 0 | 0 | 0 | 0 | 0 | 0 | 0 | 0 | 0 |
| 72.6500  | 3.9450  | -13.9350 | C | 0 | 0 | 0 | 0 | 0 | 0 | 0 | 0 | 0 | 0 | 0 | 0 | 0 |
| 72.3310  | 2.9060  | -14.0880 | H | 0 | 0 | 0 | 0 | 0 | 0 | 0 | 0 | 0 | 0 | 0 | 0 | 0 |
| 72.2960  | 4.5490  | -14.7790 | H | 0 | 0 | 0 | 0 | 0 | 0 | 0 | 0 | 0 | 0 | 0 | 0 | 0 |
| 70.3780  | 6.2010  | -13.8890 | O | 0 | 0 | 0 | 0 | 0 | 0 | 0 | 0 | 0 | 0 | 0 | 0 | 0 |
| 74.0690  | 4.0270  | -13.8290 | O | 0 | 0 | 0 | 0 | 0 | 0 | 0 | 0 | 0 | 0 | 0 | 0 | 0 |
| 74.7940  | 3.5100  | -14.8680 | C | 0 | 0 | 0 | 0 | 0 | 0 | 0 | 0 | 0 | 0 | 0 | 0 | 0 |
| 76.1720  | 3.4650  | -14.6620 | C | 0 | 0 | 0 | 0 | 0 | 0 | 0 | 0 | 0 | 0 | 0 | 0 | 0 |
| 76.5910  | 3.8290  | -13.7280 | H | 0 | 0 | 0 | 0 | 0 | 0 | 0 | 0 | 0 | 0 | 0 | 0 | 0 |
| 77.0210  | 2.9480  | -15.6450 | C | 0 | 0 | 0 | 0 | 0 | 0 | 0 | 0 | 0 | 0 | 0 | 0 | 0 |
| 78.0910  | 2.9260  | -15.4450 | H | 0 | 0 | 0 | 0 | 0 | 0 | 0 | 0 | 0 | 0 | 0 | 0 | 0 |
| 76.5150  | 2.4660  | -16.8680 | C | 0 | 0 | 0 | 0 | 0 | 0 | 0 | 0 | 0 | 0 | 0 | 0 | 0 |
| 75.1270  | 2.5270  | -17.0610 | C | 0 | 0 | 0 | 0 | 0 | 0 | 0 | 0 | 0 | 0 | 0 | 0 | 0 |
| 74.6630  | 2.1720  | -17.9780 | H | 0 | 0 | 0 | 0 | 0 | 0 | 0 | 0 | 0 | 0 | 0 | 0 | 0 |
| 74.2770  | 3.0450  | -16.0750 | C | 0 | 0 | 0 | 0 | 0 | 0 | 0 | 0 | 0 | 0 | 0 | 0 | 0 |
| 73.2130  | 3.0680  | -16.2900 | H | 0 | 0 | 0 | 0 | 0 | 0 | 0 | 0 | 0 | 0 | 0 | 0 | 0 |
| 77.4830  | 1.8770  | -17.9200 | C | 0 | 0 | 0 | 0 | 0 | 0 | 0 | 0 | 0 | 0 | 0 | 0 | 0 |
| 78.6230  | 2.8690  | -18.2510 | C | 0 | 0 | 0 | 0 | 0 | 0 | 0 | 0 | 0 | 0 | 0 | 0 | 0 |
| 77.9800  | 0.5250  | -17.3420 | C | 0 | 0 | 0 | 0 | 0 | 0 | 0 | 0 | 0 | 0 | 0 | 0 | 0 |
| 78.5740  | 0.6570  | -16.4290 | H | 0 | 0 | 0 | 0 | 0 | 0 | 0 | 0 | 0 | 0 | 0 | 0 | 0 |
| 78.5990  | -0.0220 | -18.0630 | H | 0 | 0 | 0 | 0 | 0 | 0 | 0 | 0 | 0 | 0 | 0 | 0 | 0 |
| 77.1370  | -0.1290 | -17.0850 | H | 0 | 0 | 0 | 0 | 0 | 0 | 0 | 0 | 0 | 0 | 0 | 0 | 0 |
| 76.8020  | 1.5370  | -19.2730 | C | 0 | 0 | 0 | 0 | 0 | 0 | 0 | 0 | 0 | 0 | 0 | 0 | 0 |
| 76.0340  | 0.7630  | -19.1570 | H | 0 | 0 | 0 | 0 | 0 | 0 | 0 | 0 | 0 | 0 | 0 | 0 | 0 |
| 76.3230  | 2.4120  | -19.7290 | H | 0 | 0 | 0 | 0 | 0 | 0 | 0 | 0 | 0 | 0 | 0 | 0 | 0 |
| 77.5320  | 1.1560  | -19.9990 | H | 0 | 0 | 0 | 0 | 0 | 0 | 0 | 0 | 0 | 0 | 0 | 0 | 0 |
| 78.3120  | 4.1870  | -18.6360 | C | 0 | 0 | 0 | 0 | 0 | 0 | 0 | 0 | 0 | 0 | 0 | 0 | 0 |
| 77.2760  | 4.5170  | -18.6830 | H | 0 | 0 | 0 | 0 | 0 | 0 | 0 | 0 | 0 | 0 | 0 | 0 | 0 |
| 79.3170  | 5.1020  | -18.9630 | C | 0 | 0 | 0 | 0 | 0 | 0 | 0 | 0 | 0 | 0 | 0 | 0 | 0 |
| 79.0450  | 6.1130  | -19.2560 | H | 0 | 0 | 0 | 0 | 0 | 0 | 0 | 0 | 0 | 0 | 0 | 0 | 0 |
| 80.6590  | 4.7270  | -18.9240 | C | 0 | 0 | 0 | 0 | 0 | 0 | 0 | 0 | 0 | 0 | 0 | 0 | 0 |
| 80.9860  | 3.4270  | -18.5430 | C | 0 | 0 | 0 | 0 | 0 | 0 | 0 | 0 | 0 | 0 | 0 | 0 | 0 |
| 82.0160  | 3.0880  | -18.4910 | H | 0 | 0 | 0 | 0 | 0 | 0 | 0 | 0 | 0 | 0 | 0 | 0 | 0 |
| 79.9800  | 2.5100  | -18.2120 | C | 0 | 0 | 0 | 0 | 0 | 0 | 0 | 0 | 0 | 0 | 0 | 0 | 0 |
| 80.2910  | 1.5080  | -17.9290 | H | 0 | 0 | 0 | 0 | 0 | 0 | 0 | 0 | 0 | 0 | 0 | 0 | 0 |
| 81.5410  | 5.7110  | -19.2750 | O | 0 | 0 | 0 | 0 | 0 | 0 | 0 | 0 | 0 | 0 | 0 | 0 | 0 |
| 87.7760  | 1.0620  | -18.8050 | O | 0 | 0 | 0 | 0 | 0 | 0 | 0 | 0 | 0 | 0 | 0 | 0 | 0 |
| 86.9650  | 0.6730  | -18.4270 | H | 0 | 0 | 0 | 0 | 0 | 0 | 0 | 0 | 0 | 0 | 0 | 0 | 0 |
| 87.8580  | 2.3980  | -18.2880 | C | 0 | 0 | 0 | 0 | 0 | 0 | 0 | 0 | 0 | 0 | 0 | 0 | 0 |
| 86.9040  | 2.8820  | -18.5150 | H | 0 | 0 | 0 | 0 | 0 | 0 | 0 | 0 | 0 | 0 | 0 | 0 | 0 |
| 87.9790  | 2.3280  | -17.2020 | H | 0 | 0 | 0 | 0 | 0 | 0 | 0 | 0 | 0 | 0 | 0 | 0 | 0 |
| 89.0530  | 3.1670  | -18.9310 | C | 0 | 0 | 0 | 0 | 0 | 0 | 0 | 0 | 0 | 0 | 0 | 0 | 0 |
| 88.8210  | 3.2480  | -20.0020 | H | 0 | 0 | 0 | 0 | 0 | 0 | 0 | 0 | 0 | 0 | 0 | 0 | 0 |
| 90.3120  | 2.2610  | -18.8090 | C | 0 | 0 | 0 | 0 | 0 | 0 | 0 | 0 | 0 | 0 | 0 | 0 | 0 |
| 91.2060  | 2.7170  | -19.2370 | H | 0 | 0 | 0 | 0 | 0 | 0 | 0 | 0 | 0 | 0 | 0 | 0 | 0 |
| 90.5240  | 2.0270  | -17.7600 | H | 0 | 0 | 0 | 0 | 0 | 0 | 0 | 0 | 0 | 0 | 0 | 0 | 0 |
| 90.1300  | 1.0310  | -19.5150 | O | 0 | 0 | 0 | 0 | 0 | 0 | 0 | 0 | 0 | 0 | 0 | 0 | 0 |
| 89.1970  | 0.7540  | -19.3310 | H | 0 | 0 | 0 | 0 | 0 | 0 | 0 | 0 | 0 | 0 | 0 | 0 | 0 |
| 89.2840  | 4.5320  | -18.3620 | N | 0 | 0 | 3 | 0 | 0 | 0 | 0 | 0 | 0 | 0 | 0 | 0 | 0 |
| 103.4410 | 8.8100  | -27.5610 | C | 0 | 0 | 0 | 0 | 0 | 0 | 0 | 0 | 0 | 0 | 0 | 0 | 0 |
| 103.2250 | 9.5040  | -26.7400 | H | 0 | 0 | 0 | 0 | 0 | 0 | 0 | 0 | 0 | 0 | 0 | 0 | 0 |
| 102.6360 | 8.8940  | -28.3010 | H | 0 | 0 | 0 | 0 | 0 | 0 | 0 | 0 | 0 | 0 | 0 | 0 | 0 |
| 104.6980 | 9.1450  | -28.1620 | O | 0 | 0 | 0 | 0 | 0 | 0 | 0 | 0 | 0 | 0 | 0 | 0 | 0 |
| 104.7680 | 10.4040 | -28.6820 | C | 0 | 0 | 0 | 0 | 0 | 0 | 0 | 0 | 0 | 0 | 0 | 0 | 0 |
| 106.1440 | 10.6250 | -29.2550 | C | 0 | 0 | 0 | 0 | 0 | 0 | 0 | 0 | 0 | 0 | 0 | 0 | 0 |
| 106.8460 | 10.5740 | -28.4180 | H | 0 | 0 | 0 | 0 | 0 | 0 | 0 | 0 | 0 | 0 | 0 | 0 | 0 |
| 106.3550 | 9.8160  | -29.9630 | H | 0 | 0 | 0 | 0 | 0 | 0 | 0 | 0 | 0 | 0 | 0 | 0 | 0 |
| 106.2410 | 11.9740 | -29.9590 | C | 0 | 0 | 0 | 0 | 0 | 0 | 0 | 0 | 0 | 0 | 0 | 0 | 0 |
| 105.4220 | 12.0410 | -30.6870 | H | 0 | 0 | 0 | 0 | 0 | 0 | 0 | 0 | 0 | 0 | 0 | 0 | 0 |
| 106.0680 | 12.7960 | -29.2540 | H | 0 | 0 | 0 | 0 | 0 | 0 | 0 | 0 | 0 | 0 | 0 | 0 | 0 |
| 103.8650 | 11.2280 | -28.6600 | O | 0 | 0 | 0 | 0 | 0 | 0 | 0 | 0 | 0 | 0 | 0 | 0 | 0 |
| 103.5210 | 7.3790  | -27.0450 | C | 0 | 0 | 0 | 0 | 0 | 0 | 0 | 0 | 0 | 0 | 0 | 0 | 0 |
| 103.7170 | 6.7150  | -27.8970 | H | 0 | 0 | 0 | 0 | 0 | 0 | 0 | 0 | 0 | 0 | 0 | 0 | 0 |
| 104.3730 | 7.2220  | -26.3730 | H | 0 | 0 | 0 | 0 | 0 | 0 | 0 | 0 | 0 | 0 | 0 | 0 | 0 |
| 90.2420  | 5.3040  | -19.1890 | C | 0 | 0 | 0 | 0 | 0 | 0 | 0 | 0 | 0 | 0 | 0 | 0 | 0 |





|    |     |   |   |   |   |   |
|----|-----|---|---|---|---|---|
| 20 | 22  | 1 | 0 | 0 | 0 | 0 |
| 20 | 23  | 1 | 0 | 0 | 0 | 0 |
| 23 | 24  | 1 | 0 | 0 | 0 | 0 |
| 23 | 25  | 1 | 0 | 0 | 0 | 0 |
| 23 | 88  | 1 | 0 | 0 | 0 | 0 |
| 27 | 28  | 1 | 0 | 0 | 0 | 0 |
| 27 | 29  | 1 | 0 | 0 | 0 | 0 |
| 27 | 75  | 1 | 0 | 0 | 0 | 0 |
| 30 | 31  | 1 | 0 | 0 | 0 | 0 |
| 30 | 32  | 1 | 0 | 0 | 0 | 0 |
| 30 | 33  | 1 | 0 | 0 | 0 | 0 |
| 33 | 34  | 1 | 0 | 0 | 0 | 0 |
| 33 | 35  | 1 | 0 | 0 | 0 | 0 |
| 33 | 36  | 1 | 0 | 0 | 0 | 0 |
| 36 | 37  | 1 | 0 | 0 | 0 | 0 |
| 36 | 44  | 2 | 0 | 0 | 0 | 0 |
| 37 | 38  | 1 | 0 | 0 | 0 | 0 |
| 38 | 39  | 1 | 0 | 0 | 0 | 0 |
| 38 | 40  | 1 | 0 | 0 | 0 | 0 |
| 38 | 41  | 1 | 0 | 0 | 0 | 0 |
| 41 | 42  | 1 | 0 | 0 | 0 | 0 |
| 41 | 43  | 1 | 0 | 0 | 0 | 0 |
| 41 | 45  | 1 | 0 | 0 | 0 | 0 |
| 45 | 46  | 1 | 0 | 0 | 0 | 0 |
| 46 | 47  | 1 | 0 | 0 | 0 | 0 |
| 46 | 54  | 2 | 0 | 0 | 0 | 0 |
| 47 | 48  | 1 | 0 | 0 | 0 | 0 |
| 47 | 49  | 2 | 0 | 0 | 0 | 0 |
| 49 | 50  | 1 | 0 | 0 | 0 | 0 |
| 49 | 51  | 1 | 0 | 0 | 0 | 0 |
| 51 | 52  | 2 | 0 | 0 | 0 | 0 |
| 51 | 56  | 1 | 0 | 0 | 0 | 0 |
| 52 | 53  | 1 | 0 | 0 | 0 | 0 |
| 52 | 54  | 1 | 0 | 0 | 0 | 0 |
| 54 | 55  | 1 | 0 | 0 | 0 | 0 |
| 56 | 57  | 1 | 0 | 0 | 0 | 0 |
| 56 | 58  | 1 | 0 | 0 | 0 | 0 |
| 56 | 62  | 1 | 0 | 0 | 0 | 0 |
| 57 | 66  | 1 | 0 | 0 | 0 | 0 |
| 57 | 73  | 2 | 0 | 0 | 0 | 0 |
| 58 | 59  | 1 | 0 | 0 | 0 | 0 |
| 58 | 60  | 1 | 0 | 0 | 0 | 0 |
| 58 | 61  | 1 | 0 | 0 | 0 | 0 |
| 62 | 63  | 1 | 0 | 0 | 0 | 0 |
| 62 | 64  | 1 | 0 | 0 | 0 | 0 |
| 62 | 65  | 1 | 0 | 0 | 0 | 0 |
| 66 | 67  | 1 | 0 | 0 | 0 | 0 |
| 66 | 68  | 2 | 0 | 0 | 0 | 0 |
| 68 | 69  | 1 | 0 | 0 | 0 | 0 |
| 68 | 70  | 1 | 0 | 0 | 0 | 0 |
| 70 | 71  | 2 | 0 | 0 | 0 | 0 |
| 70 | 75  | 1 | 0 | 0 | 0 | 0 |
| 71 | 72  | 1 | 0 | 0 | 0 | 0 |
| 71 | 73  | 1 | 0 | 0 | 0 | 0 |
| 73 | 74  | 1 | 0 | 0 | 0 | 0 |
| 76 | 77  | 1 | 0 | 0 | 0 | 0 |
| 76 | 78  | 1 | 0 | 0 | 0 | 0 |
| 78 | 79  | 1 | 0 | 0 | 0 | 0 |
| 78 | 80  | 1 | 0 | 0 | 0 | 0 |
| 78 | 81  | 1 | 0 | 0 | 0 | 0 |
| 81 | 82  | 1 | 0 | 0 | 0 | 0 |
| 81 | 83  | 1 | 0 | 0 | 0 | 0 |
| 81 | 88  | 1 | 0 | 0 | 0 | 0 |
| 83 | 84  | 1 | 0 | 0 | 0 | 0 |
| 83 | 85  | 1 | 0 | 0 | 0 | 0 |
| 83 | 86  | 1 | 0 | 0 | 0 | 0 |
| 86 | 87  | 1 | 0 | 0 | 0 | 0 |
| 88 | 104 | 1 | 0 | 0 | 0 | 0 |
| 89 | 90  | 1 | 0 | 0 | 0 | 0 |
| 89 | 91  | 1 | 0 | 0 | 0 | 0 |
| 89 | 92  | 1 | 0 | 0 | 0 | 0 |
| 89 | 101 | 1 | 0 | 0 | 0 | 0 |
| 92 | 93  | 1 | 0 | 0 | 0 | 0 |
| 93 | 94  | 1 | 0 | 0 | 0 | 0 |
| 93 | 100 | 2 | 0 | 0 | 0 | 0 |
| 94 | 95  | 1 | 0 | 0 | 0 | 0 |
| 94 | 96  | 1 | 0 | 0 | 0 | 0 |
| 94 | 97  | 1 | 0 | 0 | 0 | 0 |
| 97 | 98  | 1 | 0 | 0 | 0 | 0 |
| 97 | 99  | 1 | 0 | 0 | 0 | 0 |
| 97 | 162 | 1 | 0 | 0 | 0 | 0 |

|        |   |   |   |   |   |
|--------|---|---|---|---|---|
| 101102 | 1 | 0 | 0 | 0 | 0 |
| 101103 | 1 | 0 | 0 | 0 | 0 |
| 101149 | 1 | 0 | 0 | 0 | 0 |
| 104105 | 1 | 0 | 0 | 0 | 0 |
| 104106 | 1 | 0 | 0 | 0 | 0 |
| 104107 | 1 | 0 | 0 | 0 | 0 |
| 107108 | 1 | 0 | 0 | 0 | 0 |
| 107109 | 1 | 0 | 0 | 0 | 0 |
| 107110 | 1 | 0 | 0 | 0 | 0 |
| 110111 | 1 | 0 | 0 | 0 | 0 |
| 110118 | 2 | 0 | 0 | 0 | 0 |
| 111112 | 1 | 0 | 0 | 0 | 0 |
| 112113 | 1 | 0 | 0 | 0 | 0 |
| 112114 | 1 | 0 | 0 | 0 | 0 |
| 112115 | 1 | 0 | 0 | 0 | 0 |
| 115116 | 1 | 0 | 0 | 0 | 0 |
| 115117 | 1 | 0 | 0 | 0 | 0 |
| 115119 | 1 | 0 | 0 | 0 | 0 |
| 119120 | 1 | 0 | 0 | 0 | 0 |
| 120121 | 1 | 0 | 0 | 0 | 0 |
| 120128 | 2 | 0 | 0 | 0 | 0 |
| 121122 | 1 | 0 | 0 | 0 | 0 |
| 121123 | 2 | 0 | 0 | 0 | 0 |
| 123124 | 1 | 0 | 0 | 0 | 0 |
| 123125 | 1 | 0 | 0 | 0 | 0 |
| 125126 | 2 | 0 | 0 | 0 | 0 |
| 125130 | 1 | 0 | 0 | 0 | 0 |
| 126127 | 1 | 0 | 0 | 0 | 0 |
| 126128 | 1 | 0 | 0 | 0 | 0 |
| 128129 | 1 | 0 | 0 | 0 | 0 |
| 130131 | 1 | 0 | 0 | 0 | 0 |
| 130132 | 1 | 0 | 0 | 0 | 0 |
| 130136 | 1 | 0 | 0 | 0 | 0 |
| 131140 | 1 | 0 | 0 | 0 | 0 |
| 131147 | 2 | 0 | 0 | 0 | 0 |
| 132133 | 1 | 0 | 0 | 0 | 0 |
| 132134 | 1 | 0 | 0 | 0 | 0 |
| 132135 | 1 | 0 | 0 | 0 | 0 |
| 136137 | 1 | 0 | 0 | 0 | 0 |
| 136138 | 1 | 0 | 0 | 0 | 0 |
| 136139 | 1 | 0 | 0 | 0 | 0 |
| 140141 | 1 | 0 | 0 | 0 | 0 |
| 140142 | 2 | 0 | 0 | 0 | 0 |
| 142143 | 1 | 0 | 0 | 0 | 0 |
| 142144 | 1 | 0 | 0 | 0 | 0 |
| 144145 | 2 | 0 | 0 | 0 | 0 |
| 144149 | 1 | 0 | 0 | 0 | 0 |
| 145146 | 1 | 0 | 0 | 0 | 0 |
| 145147 | 1 | 0 | 0 | 0 | 0 |
| 147148 | 1 | 0 | 0 | 0 | 0 |
| 150151 | 1 | 0 | 0 | 0 | 0 |
| 150152 | 1 | 0 | 0 | 0 | 0 |
| 152153 | 1 | 0 | 0 | 0 | 0 |
| 152154 | 1 | 0 | 0 | 0 | 0 |
| 152155 | 1 | 0 | 0 | 0 | 0 |
| 155156 | 1 | 0 | 0 | 0 | 0 |
| 155157 | 1 | 0 | 0 | 0 | 0 |
| 155162 | 1 | 0 | 0 | 0 | 0 |
| 157158 | 1 | 0 | 0 | 0 | 0 |
| 157159 | 1 | 0 | 0 | 0 | 0 |
| 157160 | 1 | 0 | 0 | 0 | 0 |
| 160161 | 1 | 0 | 0 | 0 | 0 |
| 162178 | 1 | 0 | 0 | 0 | 0 |
| 163164 | 1 | 0 | 0 | 0 | 0 |
| 163165 | 1 | 0 | 0 | 0 | 0 |
| 163166 | 1 | 0 | 0 | 0 | 0 |
| 163175 | 1 | 0 | 0 | 0 | 0 |
| 166167 | 1 | 0 | 0 | 0 | 0 |
| 167168 | 1 | 0 | 0 | 0 | 0 |
| 167174 | 2 | 0 | 0 | 0 | 0 |
| 168169 | 1 | 0 | 0 | 0 | 0 |
| 168170 | 1 | 0 | 0 | 0 | 0 |
| 168171 | 1 | 0 | 0 | 0 | 0 |
| 171172 | 1 | 0 | 0 | 0 | 0 |
| 171173 | 1 | 0 | 0 | 0 | 0 |
| 171236 | 1 | 0 | 0 | 0 | 0 |
| 175176 | 1 | 0 | 0 | 0 | 0 |
| 175177 | 1 | 0 | 0 | 0 | 0 |
| 175223 | 1 | 0 | 0 | 0 | 0 |
| 178179 | 1 | 0 | 0 | 0 | 0 |
| 178180 | 1 | 0 | 0 | 0 | 0 |

|        |   |   |   |   |   |
|--------|---|---|---|---|---|
| 178181 | 1 | 0 | 0 | 0 | 0 |
| 181182 | 1 | 0 | 0 | 0 | 0 |
| 181183 | 1 | 0 | 0 | 0 | 0 |
| 181184 | 1 | 0 | 0 | 0 | 0 |
| 184185 | 1 | 0 | 0 | 0 | 0 |
| 184192 | 2 | 0 | 0 | 0 | 0 |
| 185186 | 1 | 0 | 0 | 0 | 0 |
| 186187 | 1 | 0 | 0 | 0 | 0 |
| 186188 | 1 | 0 | 0 | 0 | 0 |
| 186189 | 1 | 0 | 0 | 0 | 0 |
| 189190 | 1 | 0 | 0 | 0 | 0 |
| 189191 | 1 | 0 | 0 | 0 | 0 |
| 189193 | 1 | 0 | 0 | 0 | 0 |
| 193194 | 1 | 0 | 0 | 0 | 0 |
| 194195 | 1 | 0 | 0 | 0 | 0 |
| 194202 | 2 | 0 | 0 | 0 | 0 |
| 195196 | 1 | 0 | 0 | 0 | 0 |
| 195197 | 2 | 0 | 0 | 0 | 0 |
| 197198 | 1 | 0 | 0 | 0 | 0 |
| 197199 | 1 | 0 | 0 | 0 | 0 |
| 199200 | 2 | 0 | 0 | 0 | 0 |
| 199204 | 1 | 0 | 0 | 0 | 0 |
| 200201 | 1 | 0 | 0 | 0 | 0 |
| 200202 | 1 | 0 | 0 | 0 | 0 |
| 202203 | 1 | 0 | 0 | 0 | 0 |
| 204205 | 1 | 0 | 0 | 0 | 0 |
| 204206 | 1 | 0 | 0 | 0 | 0 |
| 204210 | 1 | 0 | 0 | 0 | 0 |
| 205214 | 1 | 0 | 0 | 0 | 0 |
| 205221 | 2 | 0 | 0 | 0 | 0 |
| 206207 | 1 | 0 | 0 | 0 | 0 |
| 206208 | 1 | 0 | 0 | 0 | 0 |
| 206209 | 1 | 0 | 0 | 0 | 0 |
| 210211 | 1 | 0 | 0 | 0 | 0 |
| 210212 | 1 | 0 | 0 | 0 | 0 |
| 210213 | 1 | 0 | 0 | 0 | 0 |
| 214215 | 1 | 0 | 0 | 0 | 0 |
| 214216 | 2 | 0 | 0 | 0 | 0 |
| 216217 | 1 | 0 | 0 | 0 | 0 |
| 216218 | 1 | 0 | 0 | 0 | 0 |
| 218219 | 2 | 0 | 0 | 0 | 0 |
| 218223 | 1 | 0 | 0 | 0 | 0 |
| 219220 | 1 | 0 | 0 | 0 | 0 |
| 219221 | 1 | 0 | 0 | 0 | 0 |
| 221222 | 1 | 0 | 0 | 0 | 0 |
| 224225 | 1 | 0 | 0 | 0 | 0 |
| 224226 | 1 | 0 | 0 | 0 | 0 |
| 226227 | 1 | 0 | 0 | 0 | 0 |
| 226228 | 1 | 0 | 0 | 0 | 0 |
| 226229 | 1 | 0 | 0 | 0 | 0 |
| 229230 | 1 | 0 | 0 | 0 | 0 |
| 229231 | 1 | 0 | 0 | 0 | 0 |
| 229236 | 1 | 0 | 0 | 0 | 0 |
| 231232 | 1 | 0 | 0 | 0 | 0 |
| 231233 | 1 | 0 | 0 | 0 | 0 |
| 231234 | 1 | 0 | 0 | 0 | 0 |
| 234235 | 1 | 0 | 0 | 0 | 0 |
| 236252 | 1 | 0 | 0 | 0 | 0 |
| 237238 | 1 | 0 | 0 | 0 | 0 |
| 237239 | 1 | 0 | 0 | 0 | 0 |
| 237240 | 1 | 0 | 0 | 0 | 0 |
| 237249 | 1 | 0 | 0 | 0 | 0 |
| 240241 | 1 | 0 | 0 | 0 | 0 |
| 241242 | 1 | 0 | 0 | 0 | 0 |
| 241248 | 2 | 0 | 0 | 0 | 0 |
| 242243 | 1 | 0 | 0 | 0 | 0 |
| 242244 | 1 | 0 | 0 | 0 | 0 |
| 242245 | 1 | 0 | 0 | 0 | 0 |
| 245246 | 1 | 0 | 0 | 0 | 0 |
| 245247 | 1 | 0 | 0 | 0 | 0 |
| 245310 | 1 | 0 | 0 | 0 | 0 |
| 249250 | 1 | 0 | 0 | 0 | 0 |
| 249251 | 1 | 0 | 0 | 0 | 0 |
| 249297 | 1 | 0 | 0 | 0 | 0 |
| 252253 | 1 | 0 | 0 | 0 | 0 |
| 252254 | 1 | 0 | 0 | 0 | 0 |
| 252255 | 1 | 0 | 0 | 0 | 0 |
| 255256 | 1 | 0 | 0 | 0 | 0 |
| 255257 | 1 | 0 | 0 | 0 | 0 |
| 255258 | 1 | 0 | 0 | 0 | 0 |
| 258259 | 1 | 0 | 0 | 0 | 0 |

|        |   |   |   |   |   |
|--------|---|---|---|---|---|
| 258266 | 2 | 0 | 0 | 0 | 0 |
| 259260 | 1 | 0 | 0 | 0 | 0 |
| 260261 | 1 | 0 | 0 | 0 | 0 |
| 260262 | 1 | 0 | 0 | 0 | 0 |
| 260263 | 1 | 0 | 0 | 0 | 0 |
| 263264 | 1 | 0 | 0 | 0 | 0 |
| 263265 | 1 | 0 | 0 | 0 | 0 |
| 263267 | 1 | 0 | 0 | 0 | 0 |
| 267268 | 1 | 0 | 0 | 0 | 0 |
| 268269 | 1 | 0 | 0 | 0 | 0 |
| 268276 | 2 | 0 | 0 | 0 | 0 |
| 269270 | 1 | 0 | 0 | 0 | 0 |
| 269271 | 2 | 0 | 0 | 0 | 0 |
| 271272 | 1 | 0 | 0 | 0 | 0 |
| 271273 | 1 | 0 | 0 | 0 | 0 |
| 273274 | 2 | 0 | 0 | 0 | 0 |
| 273278 | 1 | 0 | 0 | 0 | 0 |
| 274275 | 1 | 0 | 0 | 0 | 0 |
| 274276 | 1 | 0 | 0 | 0 | 0 |
| 276277 | 1 | 0 | 0 | 0 | 0 |
| 278279 | 1 | 0 | 0 | 0 | 0 |
| 278280 | 1 | 0 | 0 | 0 | 0 |
| 278284 | 1 | 0 | 0 | 0 | 0 |
| 279288 | 1 | 0 | 0 | 0 | 0 |
| 279295 | 2 | 0 | 0 | 0 | 0 |
| 280281 | 1 | 0 | 0 | 0 | 0 |
| 280282 | 1 | 0 | 0 | 0 | 0 |
| 280283 | 1 | 0 | 0 | 0 | 0 |
| 284285 | 1 | 0 | 0 | 0 | 0 |
| 284286 | 1 | 0 | 0 | 0 | 0 |
| 284287 | 1 | 0 | 0 | 0 | 0 |
| 288289 | 1 | 0 | 0 | 0 | 0 |
| 288290 | 2 | 0 | 0 | 0 | 0 |
| 290291 | 1 | 0 | 0 | 0 | 0 |
| 290292 | 1 | 0 | 0 | 0 | 0 |
| 292293 | 2 | 0 | 0 | 0 | 0 |
| 292297 | 1 | 0 | 0 | 0 | 0 |
| 293294 | 1 | 0 | 0 | 0 | 0 |
| 293295 | 1 | 0 | 0 | 0 | 0 |
| 295296 | 1 | 0 | 0 | 0 | 0 |
| 298299 | 1 | 0 | 0 | 0 | 0 |
| 298300 | 1 | 0 | 0 | 0 | 0 |
| 300301 | 1 | 0 | 0 | 0 | 0 |
| 300302 | 1 | 0 | 0 | 0 | 0 |
| 300303 | 1 | 0 | 0 | 0 | 0 |
| 303304 | 1 | 0 | 0 | 0 | 0 |
| 303305 | 1 | 0 | 0 | 0 | 0 |
| 303310 | 1 | 0 | 0 | 0 | 0 |
| 305306 | 1 | 0 | 0 | 0 | 0 |
| 305307 | 1 | 0 | 0 | 0 | 0 |
| 305308 | 1 | 0 | 0 | 0 | 0 |
| 308309 | 1 | 0 | 0 | 0 | 0 |
| 310326 | 1 | 0 | 0 | 0 | 0 |
| 311312 | 1 | 0 | 0 | 0 | 0 |
| 311313 | 1 | 0 | 0 | 0 | 0 |
| 311314 | 1 | 0 | 0 | 0 | 0 |
| 311323 | 1 | 0 | 0 | 0 | 0 |
| 314315 | 1 | 0 | 0 | 0 | 0 |
| 315316 | 1 | 0 | 0 | 0 | 0 |
| 315322 | 2 | 0 | 0 | 0 | 0 |
| 316317 | 1 | 0 | 0 | 0 | 0 |
| 316318 | 1 | 0 | 0 | 0 | 0 |
| 316319 | 1 | 0 | 0 | 0 | 0 |
| 319320 | 1 | 0 | 0 | 0 | 0 |
| 319321 | 1 | 0 | 0 | 0 | 0 |
| 319384 | 1 | 0 | 0 | 0 | 0 |
| 323324 | 1 | 0 | 0 | 0 | 0 |
| 323325 | 1 | 0 | 0 | 0 | 0 |
| 323371 | 1 | 0 | 0 | 0 | 0 |
| 326327 | 1 | 0 | 0 | 0 | 0 |
| 326328 | 1 | 0 | 0 | 0 | 0 |
| 326329 | 1 | 0 | 0 | 0 | 0 |
| 329330 | 1 | 0 | 0 | 0 | 0 |
| 329331 | 1 | 0 | 0 | 0 | 0 |
| 329332 | 1 | 0 | 0 | 0 | 0 |
| 332333 | 1 | 0 | 0 | 0 | 0 |
| 332340 | 2 | 0 | 0 | 0 | 0 |
| 333334 | 1 | 0 | 0 | 0 | 0 |
| 334335 | 1 | 0 | 0 | 0 | 0 |
| 334336 | 1 | 0 | 0 | 0 | 0 |
| 334337 | 1 | 0 | 0 | 0 | 0 |

```

337338 1 0 0 0 0
337339 1 0 0 0 0
337341 1 0 0 0 0
341342 1 0 0 0 0
342343 1 0 0 0 0
342350 2 0 0 0 0
343344 1 0 0 0 0
343345 2 0 0 0 0
345346 1 0 0 0 0
345347 1 0 0 0 0
347348 2 0 0 0 0
347352 1 0 0 0 0
348349 1 0 0 0 0
348350 1 0 0 0 0
350351 1 0 0 0 0
352353 1 0 0 0 0
352354 1 0 0 0 0
352358 1 0 0 0 0
353362 1 0 0 0 0
353369 2 0 0 0 0
354355 1 0 0 0 0
354356 1 0 0 0 0
354357 1 0 0 0 0
358359 1 0 0 0 0
358360 1 0 0 0 0
358361 1 0 0 0 0
362363 1 0 0 0 0
362364 2 0 0 0 0
364365 1 0 0 0 0
364366 1 0 0 0 0
366367 2 0 0 0 0
366371 1 0 0 0 0
367368 1 0 0 0 0
367369 1 0 0 0 0
369370 1 0 0 0 0
372373 1 0 0 0 0
372374 1 0 0 0 0
374375 1 0 0 0 0
374376 1 0 0 0 0
374377 1 0 0 0 0
377378 1 0 0 0 0
377379 1 0 0 0 0
377384 1 0 0 0 0
379380 1 0 0 0 0
379381 1 0 0 0 0
379382 1 0 0 0 0
382383 1 0 0 0 0
384385 1 0 0 0 0

```

```

M END
> <NAME>
D25_12

```

```

$$$$
D28_12
MOE2012 3D

```

```

397406 0 0 1 0 0 0 0 0999 V2000
12.3280 -18.9320 28.4880 O 0 0 0 0 0 0 0 0 0 0 0 0 0 0 0
11.6820 -18.7210 29.1830 H 0 0 0 0 0 0 0 0 0 0 0 0 0 0 0
12.0330 -18.0990 27.3760 C 0 0 0 0 0 0 0 0 0 0 0 0 0 0 0
11.0090 -18.3050 27.0480 H 0 0 0 0 0 0 0 0 0 0 0 0 0 0 0
12.1020 -17.0540 27.6950 H 0 0 0 0 0 0 0 0 0 0 0 0 0 0 0
13.0300 -18.3950 26.2650 C 0 0 0 0 0 0 0 0 0 0 0 0 0 0 0
14.0480 -18.2270 26.6370 H 0 0 0 0 0 0 0 0 0 0 0 0 0 0 0
12.9780 -19.4600 26.0050 H 0 0 0 0 0 0 0 0 0 0 0 0 0 0 0
12.7710 -17.5370 25.0280 C 0 0 0 0 0 0 0 0 0 0 0 0 0 0 0
11.7530 -17.7230 24.6620 H 0 0 0 0 0 0 0 0 0 0 0 0 0 0 0
12.8260 -16.4750 25.3020 H 0 0 0 0 0 0 0 0 0 0 0 0 0 0 0
13.7850 -17.8400 23.9240 C 0 0 0 0 0 0 0 0 0 0 0 0 0 0 0
14.7970 -17.6460 24.2990 H 0 0 0 0 0 0 0 0 0 0 0 0 0 0 0
13.7210 -18.8990 23.6470 H 0 0 0 0 0 0 0 0 0 0 0 0 0 0 0
13.5140 -16.9950 22.7590 N 0 0 3 0 0 0 0 0 0 0 0 0 0 0 0
12.5660 -17.1690 22.4280 H 0 0 0 0 0 0 0 0 0 0 0 0 0 0 0
27.3110 -17.2340 11.4150 C 0 0 0 0 0 0 0 0 0 0 0 0 0 0 0
26.3930 -16.7870 11.0200 H 0 0 0 0 0 0 0 0 0 0 0 0 0 0 0
27.0940 -18.3030 11.5300 H 0 0 0 0 0 0 0 0 0 0 0 0 0 0 0
28.3430 -17.0140 10.4400 O 0 0 0 0 0 0 0 0 0 0 0 0 0 0 0
29.3890 -17.8900 10.4690 C 0 0 0 0 0 0 0 0 0 0 0 0 0 0 0
30.3660 -17.5440 9.3780 C 0 0 0 0 0 0 0 0 0 0 0 0 0 0 0
29.8880 -17.7820 8.4230 H 0 0 0 0 0 0 0 0 0 0 0 0 0 0 0
30.5600 -16.4680 9.4360 H 0 0 0 0 0 0 0 0 0 0 0 0 0 0 0

```













|     |     |   |   |   |   |   |
|-----|-----|---|---|---|---|---|
| 32  | 33  | 1 | 0 | 0 | 0 | 0 |
| 32  | 34  | 1 | 0 | 0 | 0 | 0 |
| 32  | 35  | 1 | 0 | 0 | 0 | 0 |
| 35  | 36  | 1 | 0 | 0 | 0 | 0 |
| 35  | 37  | 1 | 0 | 0 | 0 | 0 |
| 35  | 38  | 1 | 0 | 0 | 0 | 0 |
| 38  | 39  | 1 | 0 | 0 | 0 | 0 |
| 38  | 46  | 2 | 0 | 0 | 0 | 0 |
| 39  | 40  | 1 | 0 | 0 | 0 | 0 |
| 40  | 41  | 1 | 0 | 0 | 0 | 0 |
| 40  | 42  | 1 | 0 | 0 | 0 | 0 |
| 40  | 43  | 1 | 0 | 0 | 0 | 0 |
| 43  | 44  | 1 | 0 | 0 | 0 | 0 |
| 43  | 45  | 1 | 0 | 0 | 0 | 0 |
| 43  | 47  | 1 | 0 | 0 | 0 | 0 |
| 47  | 48  | 1 | 0 | 0 | 0 | 0 |
| 48  | 49  | 1 | 0 | 0 | 0 | 0 |
| 48  | 56  | 2 | 0 | 0 | 0 | 0 |
| 49  | 50  | 1 | 0 | 0 | 0 | 0 |
| 49  | 51  | 2 | 0 | 0 | 0 | 0 |
| 51  | 52  | 1 | 0 | 0 | 0 | 0 |
| 51  | 53  | 1 | 0 | 0 | 0 | 0 |
| 53  | 54  | 2 | 0 | 0 | 0 | 0 |
| 53  | 58  | 1 | 0 | 0 | 0 | 0 |
| 54  | 55  | 1 | 0 | 0 | 0 | 0 |
| 54  | 56  | 1 | 0 | 0 | 0 | 0 |
| 56  | 57  | 1 | 0 | 0 | 0 | 0 |
| 58  | 59  | 1 | 0 | 0 | 0 | 0 |
| 58  | 60  | 1 | 0 | 0 | 0 | 0 |
| 58  | 64  | 1 | 0 | 0 | 0 | 0 |
| 59  | 68  | 1 | 0 | 0 | 0 | 0 |
| 59  | 75  | 2 | 0 | 0 | 0 | 0 |
| 60  | 61  | 1 | 0 | 0 | 0 | 0 |
| 60  | 62  | 1 | 0 | 0 | 0 | 0 |
| 60  | 63  | 1 | 0 | 0 | 0 | 0 |
| 64  | 65  | 1 | 0 | 0 | 0 | 0 |
| 64  | 66  | 1 | 0 | 0 | 0 | 0 |
| 64  | 67  | 1 | 0 | 0 | 0 | 0 |
| 68  | 69  | 1 | 0 | 0 | 0 | 0 |
| 68  | 70  | 2 | 0 | 0 | 0 | 0 |
| 70  | 71  | 1 | 0 | 0 | 0 | 0 |
| 70  | 72  | 1 | 0 | 0 | 0 | 0 |
| 72  | 73  | 2 | 0 | 0 | 0 | 0 |
| 72  | 77  | 1 | 0 | 0 | 0 | 0 |
| 73  | 74  | 1 | 0 | 0 | 0 | 0 |
| 73  | 75  | 1 | 0 | 0 | 0 | 0 |
| 75  | 76  | 1 | 0 | 0 | 0 | 0 |
| 78  | 79  | 1 | 0 | 0 | 0 | 0 |
| 78  | 80  | 1 | 0 | 0 | 0 | 0 |
| 80  | 81  | 1 | 0 | 0 | 0 | 0 |
| 80  | 82  | 1 | 0 | 0 | 0 | 0 |
| 80  | 83  | 1 | 0 | 0 | 0 | 0 |
| 83  | 84  | 1 | 0 | 0 | 0 | 0 |
| 83  | 85  | 1 | 0 | 0 | 0 | 0 |
| 83  | 86  | 1 | 0 | 0 | 0 | 0 |
| 86  | 87  | 1 | 0 | 0 | 0 | 0 |
| 86  | 88  | 1 | 0 | 0 | 0 | 0 |
| 86  | 89  | 1 | 0 | 0 | 0 | 0 |
| 89  | 90  | 1 | 0 | 0 | 0 | 0 |
| 89  | 91  | 1 | 0 | 0 | 0 | 0 |
| 89  | 92  | 1 | 0 | 0 | 0 | 0 |
| 92  | 108 | 1 | 0 | 0 | 0 | 0 |
| 93  | 94  | 1 | 0 | 0 | 0 | 0 |
| 93  | 95  | 1 | 0 | 0 | 0 | 0 |
| 93  | 96  | 1 | 0 | 0 | 0 | 0 |
| 93  | 105 | 1 | 0 | 0 | 0 | 0 |
| 96  | 97  | 1 | 0 | 0 | 0 | 0 |
| 97  | 98  | 1 | 0 | 0 | 0 | 0 |
| 97  | 104 | 2 | 0 | 0 | 0 | 0 |
| 98  | 99  | 1 | 0 | 0 | 0 | 0 |
| 98  | 100 | 1 | 0 | 0 | 0 | 0 |
| 98  | 101 | 1 | 0 | 0 | 0 | 0 |
| 101 | 102 | 1 | 0 | 0 | 0 | 0 |
| 101 | 103 | 1 | 0 | 0 | 0 | 0 |
| 101 | 168 | 1 | 0 | 0 | 0 | 0 |
| 105 | 106 | 1 | 0 | 0 | 0 | 0 |
| 105 | 107 | 1 | 0 | 0 | 0 | 0 |
| 105 | 153 | 1 | 0 | 0 | 0 | 0 |
| 108 | 109 | 1 | 0 | 0 | 0 | 0 |
| 108 | 110 | 1 | 0 | 0 | 0 | 0 |
| 108 | 111 | 1 | 0 | 0 | 0 | 0 |

|        |   |   |   |   |   |
|--------|---|---|---|---|---|
| 111112 | 1 | 0 | 0 | 0 | 0 |
| 111113 | 1 | 0 | 0 | 0 | 0 |
| 111114 | 1 | 0 | 0 | 0 | 0 |
| 114115 | 1 | 0 | 0 | 0 | 0 |
| 114122 | 2 | 0 | 0 | 0 | 0 |
| 115116 | 1 | 0 | 0 | 0 | 0 |
| 116117 | 1 | 0 | 0 | 0 | 0 |
| 116118 | 1 | 0 | 0 | 0 | 0 |
| 116119 | 1 | 0 | 0 | 0 | 0 |
| 119120 | 1 | 0 | 0 | 0 | 0 |
| 119121 | 1 | 0 | 0 | 0 | 0 |
| 119123 | 1 | 0 | 0 | 0 | 0 |
| 123124 | 1 | 0 | 0 | 0 | 0 |
| 124125 | 1 | 0 | 0 | 0 | 0 |
| 124132 | 2 | 0 | 0 | 0 | 0 |
| 125126 | 1 | 0 | 0 | 0 | 0 |
| 125127 | 2 | 0 | 0 | 0 | 0 |
| 127128 | 1 | 0 | 0 | 0 | 0 |
| 127129 | 1 | 0 | 0 | 0 | 0 |
| 129130 | 2 | 0 | 0 | 0 | 0 |
| 129134 | 1 | 0 | 0 | 0 | 0 |
| 130131 | 1 | 0 | 0 | 0 | 0 |
| 130132 | 1 | 0 | 0 | 0 | 0 |
| 132133 | 1 | 0 | 0 | 0 | 0 |
| 134135 | 1 | 0 | 0 | 0 | 0 |
| 134136 | 1 | 0 | 0 | 0 | 0 |
| 134140 | 1 | 0 | 0 | 0 | 0 |
| 135144 | 1 | 0 | 0 | 0 | 0 |
| 135151 | 2 | 0 | 0 | 0 | 0 |
| 136137 | 1 | 0 | 0 | 0 | 0 |
| 136138 | 1 | 0 | 0 | 0 | 0 |
| 136139 | 1 | 0 | 0 | 0 | 0 |
| 140141 | 1 | 0 | 0 | 0 | 0 |
| 140142 | 1 | 0 | 0 | 0 | 0 |
| 140143 | 1 | 0 | 0 | 0 | 0 |
| 144145 | 1 | 0 | 0 | 0 | 0 |
| 144146 | 2 | 0 | 0 | 0 | 0 |
| 146147 | 1 | 0 | 0 | 0 | 0 |
| 146148 | 1 | 0 | 0 | 0 | 0 |
| 148149 | 2 | 0 | 0 | 0 | 0 |
| 148153 | 1 | 0 | 0 | 0 | 0 |
| 149150 | 1 | 0 | 0 | 0 | 0 |
| 149151 | 1 | 0 | 0 | 0 | 0 |
| 151152 | 1 | 0 | 0 | 0 | 0 |
| 154155 | 1 | 0 | 0 | 0 | 0 |
| 154156 | 1 | 0 | 0 | 0 | 0 |
| 156157 | 1 | 0 | 0 | 0 | 0 |
| 156158 | 1 | 0 | 0 | 0 | 0 |
| 156159 | 1 | 0 | 0 | 0 | 0 |
| 159160 | 1 | 0 | 0 | 0 | 0 |
| 159161 | 1 | 0 | 0 | 0 | 0 |
| 159162 | 1 | 0 | 0 | 0 | 0 |
| 162163 | 1 | 0 | 0 | 0 | 0 |
| 162164 | 1 | 0 | 0 | 0 | 0 |
| 162165 | 1 | 0 | 0 | 0 | 0 |
| 165166 | 1 | 0 | 0 | 0 | 0 |
| 165167 | 1 | 0 | 0 | 0 | 0 |
| 165168 | 1 | 0 | 0 | 0 | 0 |
| 168184 | 1 | 0 | 0 | 0 | 0 |
| 169170 | 1 | 0 | 0 | 0 | 0 |
| 169171 | 1 | 0 | 0 | 0 | 0 |
| 169172 | 1 | 0 | 0 | 0 | 0 |
| 169181 | 1 | 0 | 0 | 0 | 0 |
| 172173 | 1 | 0 | 0 | 0 | 0 |
| 173174 | 1 | 0 | 0 | 0 | 0 |
| 173180 | 2 | 0 | 0 | 0 | 0 |
| 174175 | 1 | 0 | 0 | 0 | 0 |
| 174176 | 1 | 0 | 0 | 0 | 0 |
| 174177 | 1 | 0 | 0 | 0 | 0 |
| 177178 | 1 | 0 | 0 | 0 | 0 |
| 177179 | 1 | 0 | 0 | 0 | 0 |
| 177244 | 1 | 0 | 0 | 0 | 0 |
| 181182 | 1 | 0 | 0 | 0 | 0 |
| 181183 | 1 | 0 | 0 | 0 | 0 |
| 181229 | 1 | 0 | 0 | 0 | 0 |
| 184185 | 1 | 0 | 0 | 0 | 0 |
| 184186 | 1 | 0 | 0 | 0 | 0 |
| 184187 | 1 | 0 | 0 | 0 | 0 |
| 187188 | 1 | 0 | 0 | 0 | 0 |
| 187189 | 1 | 0 | 0 | 0 | 0 |
| 187190 | 1 | 0 | 0 | 0 | 0 |

|        |   |   |   |   |   |
|--------|---|---|---|---|---|
| 190191 | 1 | 0 | 0 | 0 | 0 |
| 190198 | 2 | 0 | 0 | 0 | 0 |
| 191192 | 1 | 0 | 0 | 0 | 0 |
| 192193 | 1 | 0 | 0 | 0 | 0 |
| 192194 | 1 | 0 | 0 | 0 | 0 |
| 192195 | 1 | 0 | 0 | 0 | 0 |
| 195196 | 1 | 0 | 0 | 0 | 0 |
| 195197 | 1 | 0 | 0 | 0 | 0 |
| 195199 | 1 | 0 | 0 | 0 | 0 |
| 199200 | 1 | 0 | 0 | 0 | 0 |
| 200201 | 1 | 0 | 0 | 0 | 0 |
| 200208 | 2 | 0 | 0 | 0 | 0 |
| 201202 | 1 | 0 | 0 | 0 | 0 |
| 201203 | 2 | 0 | 0 | 0 | 0 |
| 203204 | 1 | 0 | 0 | 0 | 0 |
| 203205 | 1 | 0 | 0 | 0 | 0 |
| 205206 | 2 | 0 | 0 | 0 | 0 |
| 205210 | 1 | 0 | 0 | 0 | 0 |
| 206207 | 1 | 0 | 0 | 0 | 0 |
| 206208 | 1 | 0 | 0 | 0 | 0 |
| 208209 | 1 | 0 | 0 | 0 | 0 |
| 210211 | 1 | 0 | 0 | 0 | 0 |
| 210212 | 1 | 0 | 0 | 0 | 0 |
| 210216 | 1 | 0 | 0 | 0 | 0 |
| 211220 | 1 | 0 | 0 | 0 | 0 |
| 211227 | 2 | 0 | 0 | 0 | 0 |
| 212213 | 1 | 0 | 0 | 0 | 0 |
| 212214 | 1 | 0 | 0 | 0 | 0 |
| 212215 | 1 | 0 | 0 | 0 | 0 |
| 216217 | 1 | 0 | 0 | 0 | 0 |
| 216218 | 1 | 0 | 0 | 0 | 0 |
| 216219 | 1 | 0 | 0 | 0 | 0 |
| 220221 | 1 | 0 | 0 | 0 | 0 |
| 220222 | 2 | 0 | 0 | 0 | 0 |
| 222223 | 1 | 0 | 0 | 0 | 0 |
| 222224 | 1 | 0 | 0 | 0 | 0 |
| 224225 | 2 | 0 | 0 | 0 | 0 |
| 224229 | 1 | 0 | 0 | 0 | 0 |
| 225226 | 1 | 0 | 0 | 0 | 0 |
| 225227 | 1 | 0 | 0 | 0 | 0 |
| 227228 | 1 | 0 | 0 | 0 | 0 |
| 230231 | 1 | 0 | 0 | 0 | 0 |
| 230232 | 1 | 0 | 0 | 0 | 0 |
| 232233 | 1 | 0 | 0 | 0 | 0 |
| 232234 | 1 | 0 | 0 | 0 | 0 |
| 232235 | 1 | 0 | 0 | 0 | 0 |
| 235236 | 1 | 0 | 0 | 0 | 0 |
| 235237 | 1 | 0 | 0 | 0 | 0 |
| 235238 | 1 | 0 | 0 | 0 | 0 |
| 238239 | 1 | 0 | 0 | 0 | 0 |
| 238240 | 1 | 0 | 0 | 0 | 0 |
| 238241 | 1 | 0 | 0 | 0 | 0 |
| 241242 | 1 | 0 | 0 | 0 | 0 |
| 241243 | 1 | 0 | 0 | 0 | 0 |
| 241244 | 1 | 0 | 0 | 0 | 0 |
| 244260 | 1 | 0 | 0 | 0 | 0 |
| 245246 | 1 | 0 | 0 | 0 | 0 |
| 245247 | 1 | 0 | 0 | 0 | 0 |
| 245248 | 1 | 0 | 0 | 0 | 0 |
| 245257 | 1 | 0 | 0 | 0 | 0 |
| 248249 | 1 | 0 | 0 | 0 | 0 |
| 249250 | 1 | 0 | 0 | 0 | 0 |
| 249256 | 2 | 0 | 0 | 0 | 0 |
| 250251 | 1 | 0 | 0 | 0 | 0 |
| 250252 | 1 | 0 | 0 | 0 | 0 |
| 250253 | 1 | 0 | 0 | 0 | 0 |
| 253254 | 1 | 0 | 0 | 0 | 0 |
| 253255 | 1 | 0 | 0 | 0 | 0 |
| 253320 | 1 | 0 | 0 | 0 | 0 |
| 257258 | 1 | 0 | 0 | 0 | 0 |
| 257259 | 1 | 0 | 0 | 0 | 0 |
| 257305 | 1 | 0 | 0 | 0 | 0 |
| 260261 | 1 | 0 | 0 | 0 | 0 |
| 260262 | 1 | 0 | 0 | 0 | 0 |
| 260263 | 1 | 0 | 0 | 0 | 0 |
| 263264 | 1 | 0 | 0 | 0 | 0 |
| 263265 | 1 | 0 | 0 | 0 | 0 |
| 263266 | 1 | 0 | 0 | 0 | 0 |
| 266267 | 1 | 0 | 0 | 0 | 0 |
| 266274 | 2 | 0 | 0 | 0 | 0 |
| 267268 | 1 | 0 | 0 | 0 | 0 |

|        |   |   |   |   |   |
|--------|---|---|---|---|---|
| 268269 | 1 | 0 | 0 | 0 | 0 |
| 268270 | 1 | 0 | 0 | 0 | 0 |
| 268271 | 1 | 0 | 0 | 0 | 0 |
| 271272 | 1 | 0 | 0 | 0 | 0 |
| 271273 | 1 | 0 | 0 | 0 | 0 |
| 271275 | 1 | 0 | 0 | 0 | 0 |
| 275276 | 1 | 0 | 0 | 0 | 0 |
| 276277 | 1 | 0 | 0 | 0 | 0 |
| 276284 | 2 | 0 | 0 | 0 | 0 |
| 277278 | 1 | 0 | 0 | 0 | 0 |
| 277279 | 2 | 0 | 0 | 0 | 0 |
| 279280 | 1 | 0 | 0 | 0 | 0 |
| 279281 | 1 | 0 | 0 | 0 | 0 |
| 281282 | 2 | 0 | 0 | 0 | 0 |
| 281286 | 1 | 0 | 0 | 0 | 0 |
| 282283 | 1 | 0 | 0 | 0 | 0 |
| 282284 | 1 | 0 | 0 | 0 | 0 |
| 284285 | 1 | 0 | 0 | 0 | 0 |
| 286287 | 1 | 0 | 0 | 0 | 0 |
| 286288 | 1 | 0 | 0 | 0 | 0 |
| 286292 | 1 | 0 | 0 | 0 | 0 |
| 287296 | 1 | 0 | 0 | 0 | 0 |
| 287303 | 2 | 0 | 0 | 0 | 0 |
| 288289 | 1 | 0 | 0 | 0 | 0 |
| 288290 | 1 | 0 | 0 | 0 | 0 |
| 288291 | 1 | 0 | 0 | 0 | 0 |
| 292293 | 1 | 0 | 0 | 0 | 0 |
| 292294 | 1 | 0 | 0 | 0 | 0 |
| 292295 | 1 | 0 | 0 | 0 | 0 |
| 296297 | 1 | 0 | 0 | 0 | 0 |
| 296298 | 2 | 0 | 0 | 0 | 0 |
| 298299 | 1 | 0 | 0 | 0 | 0 |
| 298300 | 1 | 0 | 0 | 0 | 0 |
| 300301 | 2 | 0 | 0 | 0 | 0 |
| 300305 | 1 | 0 | 0 | 0 | 0 |
| 301302 | 1 | 0 | 0 | 0 | 0 |
| 301303 | 1 | 0 | 0 | 0 | 0 |
| 303304 | 1 | 0 | 0 | 0 | 0 |
| 306307 | 1 | 0 | 0 | 0 | 0 |
| 306308 | 1 | 0 | 0 | 0 | 0 |
| 308309 | 1 | 0 | 0 | 0 | 0 |
| 308310 | 1 | 0 | 0 | 0 | 0 |
| 308311 | 1 | 0 | 0 | 0 | 0 |
| 311312 | 1 | 0 | 0 | 0 | 0 |
| 311313 | 1 | 0 | 0 | 0 | 0 |
| 311314 | 1 | 0 | 0 | 0 | 0 |
| 314315 | 1 | 0 | 0 | 0 | 0 |
| 314316 | 1 | 0 | 0 | 0 | 0 |
| 314317 | 1 | 0 | 0 | 0 | 0 |
| 317318 | 1 | 0 | 0 | 0 | 0 |
| 317319 | 1 | 0 | 0 | 0 | 0 |
| 317320 | 1 | 0 | 0 | 0 | 0 |
| 320336 | 1 | 0 | 0 | 0 | 0 |
| 321322 | 1 | 0 | 0 | 0 | 0 |
| 321323 | 1 | 0 | 0 | 0 | 0 |
| 321324 | 1 | 0 | 0 | 0 | 0 |
| 321333 | 1 | 0 | 0 | 0 | 0 |
| 324325 | 1 | 0 | 0 | 0 | 0 |
| 325326 | 1 | 0 | 0 | 0 | 0 |
| 325332 | 2 | 0 | 0 | 0 | 0 |
| 326327 | 1 | 0 | 0 | 0 | 0 |
| 326328 | 1 | 0 | 0 | 0 | 0 |
| 326329 | 1 | 0 | 0 | 0 | 0 |
| 329330 | 1 | 0 | 0 | 0 | 0 |
| 329331 | 1 | 0 | 0 | 0 | 0 |
| 329396 | 1 | 0 | 0 | 0 | 0 |
| 333334 | 1 | 0 | 0 | 0 | 0 |
| 333335 | 1 | 0 | 0 | 0 | 0 |
| 333381 | 1 | 0 | 0 | 0 | 0 |
| 336337 | 1 | 0 | 0 | 0 | 0 |
| 336338 | 1 | 0 | 0 | 0 | 0 |
| 336339 | 1 | 0 | 0 | 0 | 0 |
| 339340 | 1 | 0 | 0 | 0 | 0 |
| 339341 | 1 | 0 | 0 | 0 | 0 |
| 339342 | 1 | 0 | 0 | 0 | 0 |
| 342343 | 1 | 0 | 0 | 0 | 0 |
| 342350 | 2 | 0 | 0 | 0 | 0 |
| 343344 | 1 | 0 | 0 | 0 | 0 |
| 344345 | 1 | 0 | 0 | 0 | 0 |
| 344346 | 1 | 0 | 0 | 0 | 0 |
| 344347 | 1 | 0 | 0 | 0 | 0 |

```

347348 1 0 0 0 0
347349 1 0 0 0 0
347351 1 0 0 0 0
351352 1 0 0 0 0
352353 1 0 0 0 0
352360 2 0 0 0 0
353354 1 0 0 0 0
353355 2 0 0 0 0
355356 1 0 0 0 0
355357 1 0 0 0 0
357358 2 0 0 0 0
357362 1 0 0 0 0
358359 1 0 0 0 0
358360 1 0 0 0 0
360361 1 0 0 0 0
362363 1 0 0 0 0
362364 1 0 0 0 0
362368 1 0 0 0 0
363372 1 0 0 0 0
363379 2 0 0 0 0
364365 1 0 0 0 0
364366 1 0 0 0 0
364367 1 0 0 0 0
368369 1 0 0 0 0
368370 1 0 0 0 0
368371 1 0 0 0 0
372373 1 0 0 0 0
372374 2 0 0 0 0
374375 1 0 0 0 0
374376 1 0 0 0 0
376377 2 0 0 0 0
376381 1 0 0 0 0
377378 1 0 0 0 0
377379 1 0 0 0 0
379380 1 0 0 0 0
382383 1 0 0 0 0
382384 1 0 0 0 0
384385 1 0 0 0 0
384386 1 0 0 0 0
384387 1 0 0 0 0
387388 1 0 0 0 0
387389 1 0 0 0 0
387390 1 0 0 0 0
390391 1 0 0 0 0
390392 1 0 0 0 0
390393 1 0 0 0 0
393394 1 0 0 0 0
393395 1 0 0 0 0
393396 1 0 0 0 0
396397 1 0 0 0 0

```

```

M END
> <NAME>
D28_12

```

```

$$$$
D32_12
MOE2012 3D

```

```

415424 0 0 1 0 0 0 0 0999 V2000
44.2230 9.5370 -56.3820 O 0 0 0 0 0 0 0 0 0 0 0 0 0 0 0 0
44.9710 10.0650 -56.7100 H 0 0 0 0 0 0 0 0 0 0 0 0 0 0 0 0
44.5210 9.1790 -55.0400 C 0 0 0 0 0 0 0 0 0 0 0 0 0 0 0 0
45.4580 8.6130 -55.0290 H 0 0 0 0 0 0 0 0 0 0 0 0 0 0 0 0
44.6510 10.0960 -54.4560 H 0 0 0 0 0 0 0 0 0 0 0 0 0 0 0 0
43.3740 8.3430 -54.4900 C 0 0 0 0 0 0 0 0 0 0 0 0 0 0 0 0
42.4400 8.9140 -54.5650 H 0 0 0 0 0 0 0 0 0 0 0 0 0 0 0 0
43.2350 7.4580 -55.1250 H 0 0 0 0 0 0 0 0 0 0 0 0 0 0 0 0
43.6210 7.9220 -53.0430 C 0 0 0 0 0 0 0 0 0 0 0 0 0 0 0 0
44.5550 7.3500 -52.9810 H 0 0 0 0 0 0 0 0 0 0 0 0 0 0 0 0
43.7450 8.8140 -52.4170 H 0 0 0 0 0 0 0 0 0 0 0 0 0 0 0 0
42.4650 7.0740 -52.5070 C 0 0 0 0 0 0 0 0 0 0 0 0 0 0 0 0
41.5320 7.6480 -52.5720 H 0 0 0 0 0 0 0 0 0 0 0 0 0 0 0 0
42.3420 6.1850 -53.1380 H 0 0 0 0 0 0 0 0 0 0 0 0 0 0 0 0
42.7120 6.6490 -51.0570 C 0 0 0 0 0 0 0 0 0 0 0 0 0 0 0 0
43.6470 6.0790 -51.0020 H 0 0 0 0 0 0 0 0 0 0 0 0 0 0 0 0
42.8190 7.5420 -50.4320 H 0 0 0 0 0 0 0 0 0 0 0 0 0 0 0 0
41.5950 5.8250 -50.5970 N 0 0 3 0 0 0 0 0 0 0 0 0 0 0 0 0
40.7240 6.3520 -50.6500 H 0 0 0 0 0 0 0 0 0 0 0 0 0 0 0 0
39.0030 -1.7200 -34.6170 C 0 0 0 0 0 0 0 0 0 0 0 0 0 0 0 0
39.1910 -0.6420 -34.6480 H 0 0 0 0 0 0 0 0 0 0 0 0 0 0 0 0
39.9390 -2.1920 -34.9430 H 0 0 0 0 0 0 0 0 0 0 0 0 0 0 0 0

```













|    |    |   |   |   |   |   |
|----|----|---|---|---|---|---|
| 12 | 14 | 1 | 0 | 0 | 0 | 0 |
| 12 | 15 | 1 | 0 | 0 | 0 | 0 |
| 15 | 16 | 1 | 0 | 0 | 0 | 0 |
| 15 | 17 | 1 | 0 | 0 | 0 | 0 |
| 15 | 18 | 1 | 0 | 0 | 0 | 0 |
| 18 | 19 | 1 | 0 | 0 | 0 | 0 |
| 18 | 35 | 1 | 0 | 0 | 0 | 0 |
| 20 | 21 | 1 | 0 | 0 | 0 | 0 |
| 20 | 22 | 1 | 0 | 0 | 0 | 0 |
| 20 | 23 | 1 | 0 | 0 | 0 | 0 |
| 20 | 32 | 1 | 0 | 0 | 0 | 0 |
| 23 | 24 | 1 | 0 | 0 | 0 | 0 |
| 24 | 25 | 1 | 0 | 0 | 0 | 0 |
| 24 | 31 | 2 | 0 | 0 | 0 | 0 |
| 25 | 26 | 1 | 0 | 0 | 0 | 0 |
| 25 | 27 | 1 | 0 | 0 | 0 | 0 |
| 25 | 28 | 1 | 0 | 0 | 0 | 0 |
| 28 | 29 | 1 | 0 | 0 | 0 | 0 |
| 28 | 30 | 1 | 0 | 0 | 0 | 0 |
| 28 | 98 | 1 | 0 | 0 | 0 | 0 |
| 32 | 33 | 1 | 0 | 0 | 0 | 0 |
| 32 | 34 | 1 | 0 | 0 | 0 | 0 |
| 32 | 80 | 1 | 0 | 0 | 0 | 0 |
| 35 | 36 | 1 | 0 | 0 | 0 | 0 |
| 35 | 37 | 1 | 0 | 0 | 0 | 0 |
| 35 | 38 | 1 | 0 | 0 | 0 | 0 |
| 38 | 39 | 1 | 0 | 0 | 0 | 0 |
| 38 | 40 | 1 | 0 | 0 | 0 | 0 |
| 38 | 41 | 1 | 0 | 0 | 0 | 0 |
| 41 | 42 | 1 | 0 | 0 | 0 | 0 |
| 41 | 49 | 2 | 0 | 0 | 0 | 0 |
| 42 | 43 | 1 | 0 | 0 | 0 | 0 |
| 43 | 44 | 1 | 0 | 0 | 0 | 0 |
| 43 | 45 | 1 | 0 | 0 | 0 | 0 |
| 43 | 46 | 1 | 0 | 0 | 0 | 0 |
| 46 | 47 | 1 | 0 | 0 | 0 | 0 |
| 46 | 48 | 1 | 0 | 0 | 0 | 0 |
| 46 | 50 | 1 | 0 | 0 | 0 | 0 |
| 50 | 51 | 1 | 0 | 0 | 0 | 0 |
| 51 | 52 | 1 | 0 | 0 | 0 | 0 |
| 51 | 59 | 2 | 0 | 0 | 0 | 0 |
| 52 | 53 | 1 | 0 | 0 | 0 | 0 |
| 52 | 54 | 2 | 0 | 0 | 0 | 0 |
| 54 | 55 | 1 | 0 | 0 | 0 | 0 |
| 54 | 56 | 1 | 0 | 0 | 0 | 0 |
| 56 | 57 | 2 | 0 | 0 | 0 | 0 |
| 56 | 61 | 1 | 0 | 0 | 0 | 0 |
| 57 | 58 | 1 | 0 | 0 | 0 | 0 |
| 57 | 59 | 1 | 0 | 0 | 0 | 0 |
| 59 | 60 | 1 | 0 | 0 | 0 | 0 |
| 61 | 62 | 1 | 0 | 0 | 0 | 0 |
| 61 | 63 | 1 | 0 | 0 | 0 | 0 |
| 61 | 67 | 1 | 0 | 0 | 0 | 0 |
| 62 | 71 | 1 | 0 | 0 | 0 | 0 |
| 62 | 78 | 2 | 0 | 0 | 0 | 0 |
| 63 | 64 | 1 | 0 | 0 | 0 | 0 |
| 63 | 65 | 1 | 0 | 0 | 0 | 0 |
| 63 | 66 | 1 | 0 | 0 | 0 | 0 |
| 67 | 68 | 1 | 0 | 0 | 0 | 0 |
| 67 | 69 | 1 | 0 | 0 | 0 | 0 |
| 67 | 70 | 1 | 0 | 0 | 0 | 0 |
| 71 | 72 | 1 | 0 | 0 | 0 | 0 |
| 71 | 73 | 2 | 0 | 0 | 0 | 0 |
| 73 | 74 | 1 | 0 | 0 | 0 | 0 |
| 73 | 75 | 1 | 0 | 0 | 0 | 0 |
| 75 | 76 | 2 | 0 | 0 | 0 | 0 |
| 75 | 80 | 1 | 0 | 0 | 0 | 0 |
| 76 | 77 | 1 | 0 | 0 | 0 | 0 |
| 76 | 78 | 1 | 0 | 0 | 0 | 0 |
| 78 | 79 | 1 | 0 | 0 | 0 | 0 |
| 81 | 82 | 1 | 0 | 0 | 0 | 0 |
| 81 | 83 | 1 | 0 | 0 | 0 | 0 |
| 83 | 84 | 1 | 0 | 0 | 0 | 0 |
| 83 | 85 | 1 | 0 | 0 | 0 | 0 |
| 83 | 86 | 1 | 0 | 0 | 0 | 0 |
| 86 | 87 | 1 | 0 | 0 | 0 | 0 |
| 86 | 88 | 1 | 0 | 0 | 0 | 0 |
| 86 | 89 | 1 | 0 | 0 | 0 | 0 |
| 89 | 90 | 1 | 0 | 0 | 0 | 0 |
| 89 | 91 | 1 | 0 | 0 | 0 | 0 |
| 89 | 92 | 1 | 0 | 0 | 0 | 0 |

|     |     |   |   |   |   |   |
|-----|-----|---|---|---|---|---|
| 92  | 93  | 1 | 0 | 0 | 0 | 0 |
| 92  | 94  | 1 | 0 | 0 | 0 | 0 |
| 92  | 95  | 1 | 0 | 0 | 0 | 0 |
| 95  | 96  | 1 | 0 | 0 | 0 | 0 |
| 95  | 97  | 1 | 0 | 0 | 0 | 0 |
| 95  | 98  | 1 | 0 | 0 | 0 | 0 |
| 98  | 114 | 1 | 0 | 0 | 0 | 0 |
| 99  | 100 | 1 | 0 | 0 | 0 | 0 |
| 99  | 101 | 1 | 0 | 0 | 0 | 0 |
| 99  | 102 | 1 | 0 | 0 | 0 | 0 |
| 99  | 111 | 1 | 0 | 0 | 0 | 0 |
| 102 | 103 | 1 | 0 | 0 | 0 | 0 |
| 103 | 104 | 1 | 0 | 0 | 0 | 0 |
| 103 | 110 | 2 | 0 | 0 | 0 | 0 |
| 104 | 105 | 1 | 0 | 0 | 0 | 0 |
| 104 | 106 | 1 | 0 | 0 | 0 | 0 |
| 104 | 107 | 1 | 0 | 0 | 0 | 0 |
| 107 | 108 | 1 | 0 | 0 | 0 | 0 |
| 107 | 109 | 1 | 0 | 0 | 0 | 0 |
| 107 | 177 | 1 | 0 | 0 | 0 | 0 |
| 111 | 112 | 1 | 0 | 0 | 0 | 0 |
| 111 | 113 | 1 | 0 | 0 | 0 | 0 |
| 111 | 159 | 1 | 0 | 0 | 0 | 0 |
| 114 | 115 | 1 | 0 | 0 | 0 | 0 |
| 114 | 116 | 1 | 0 | 0 | 0 | 0 |
| 114 | 117 | 1 | 0 | 0 | 0 | 0 |
| 117 | 118 | 1 | 0 | 0 | 0 | 0 |
| 117 | 119 | 1 | 0 | 0 | 0 | 0 |
| 117 | 120 | 1 | 0 | 0 | 0 | 0 |
| 120 | 121 | 1 | 0 | 0 | 0 | 0 |
| 120 | 128 | 2 | 0 | 0 | 0 | 0 |
| 121 | 122 | 1 | 0 | 0 | 0 | 0 |
| 122 | 123 | 1 | 0 | 0 | 0 | 0 |
| 122 | 124 | 1 | 0 | 0 | 0 | 0 |
| 122 | 125 | 1 | 0 | 0 | 0 | 0 |
| 125 | 126 | 1 | 0 | 0 | 0 | 0 |
| 125 | 127 | 1 | 0 | 0 | 0 | 0 |
| 125 | 129 | 1 | 0 | 0 | 0 | 0 |
| 129 | 130 | 1 | 0 | 0 | 0 | 0 |
| 130 | 131 | 1 | 0 | 0 | 0 | 0 |
| 130 | 138 | 2 | 0 | 0 | 0 | 0 |
| 131 | 132 | 1 | 0 | 0 | 0 | 0 |
| 131 | 133 | 2 | 0 | 0 | 0 | 0 |
| 133 | 134 | 1 | 0 | 0 | 0 | 0 |
| 133 | 135 | 1 | 0 | 0 | 0 | 0 |
| 135 | 136 | 2 | 0 | 0 | 0 | 0 |
| 135 | 140 | 1 | 0 | 0 | 0 | 0 |
| 136 | 137 | 1 | 0 | 0 | 0 | 0 |
| 136 | 138 | 1 | 0 | 0 | 0 | 0 |
| 138 | 139 | 1 | 0 | 0 | 0 | 0 |
| 140 | 141 | 1 | 0 | 0 | 0 | 0 |
| 140 | 142 | 1 | 0 | 0 | 0 | 0 |
| 140 | 146 | 1 | 0 | 0 | 0 | 0 |
| 141 | 150 | 1 | 0 | 0 | 0 | 0 |
| 141 | 157 | 2 | 0 | 0 | 0 | 0 |
| 142 | 143 | 1 | 0 | 0 | 0 | 0 |
| 142 | 144 | 1 | 0 | 0 | 0 | 0 |
| 142 | 145 | 1 | 0 | 0 | 0 | 0 |
| 146 | 147 | 1 | 0 | 0 | 0 | 0 |
| 146 | 148 | 1 | 0 | 0 | 0 | 0 |
| 146 | 149 | 1 | 0 | 0 | 0 | 0 |
| 150 | 151 | 1 | 0 | 0 | 0 | 0 |
| 150 | 152 | 2 | 0 | 0 | 0 | 0 |
| 152 | 153 | 1 | 0 | 0 | 0 | 0 |
| 152 | 154 | 1 | 0 | 0 | 0 | 0 |
| 154 | 155 | 2 | 0 | 0 | 0 | 0 |
| 154 | 159 | 1 | 0 | 0 | 0 | 0 |
| 155 | 156 | 1 | 0 | 0 | 0 | 0 |
| 155 | 157 | 1 | 0 | 0 | 0 | 0 |
| 157 | 158 | 1 | 0 | 0 | 0 | 0 |
| 160 | 161 | 1 | 0 | 0 | 0 | 0 |
| 160 | 162 | 1 | 0 | 0 | 0 | 0 |
| 162 | 163 | 1 | 0 | 0 | 0 | 0 |
| 162 | 164 | 1 | 0 | 0 | 0 | 0 |
| 162 | 165 | 1 | 0 | 0 | 0 | 0 |
| 165 | 166 | 1 | 0 | 0 | 0 | 0 |
| 165 | 167 | 1 | 0 | 0 | 0 | 0 |
| 165 | 168 | 1 | 0 | 0 | 0 | 0 |
| 168 | 169 | 1 | 0 | 0 | 0 | 0 |
| 168 | 170 | 1 | 0 | 0 | 0 | 0 |
| 168 | 171 | 1 | 0 | 0 | 0 | 0 |

|        |   |   |   |   |   |
|--------|---|---|---|---|---|
| 171172 | 1 | 0 | 0 | 0 | 0 |
| 171173 | 1 | 0 | 0 | 0 | 0 |
| 171174 | 1 | 0 | 0 | 0 | 0 |
| 174175 | 1 | 0 | 0 | 0 | 0 |
| 174176 | 1 | 0 | 0 | 0 | 0 |
| 174177 | 1 | 0 | 0 | 0 | 0 |
| 177193 | 1 | 0 | 0 | 0 | 0 |
| 178179 | 1 | 0 | 0 | 0 | 0 |
| 178180 | 1 | 0 | 0 | 0 | 0 |
| 178181 | 1 | 0 | 0 | 0 | 0 |
| 178190 | 1 | 0 | 0 | 0 | 0 |
| 181182 | 1 | 0 | 0 | 0 | 0 |
| 182183 | 1 | 0 | 0 | 0 | 0 |
| 182189 | 2 | 0 | 0 | 0 | 0 |
| 183184 | 1 | 0 | 0 | 0 | 0 |
| 183185 | 1 | 0 | 0 | 0 | 0 |
| 183186 | 1 | 0 | 0 | 0 | 0 |
| 186187 | 1 | 0 | 0 | 0 | 0 |
| 186188 | 1 | 0 | 0 | 0 | 0 |
| 186256 | 1 | 0 | 0 | 0 | 0 |
| 190191 | 1 | 0 | 0 | 0 | 0 |
| 190192 | 1 | 0 | 0 | 0 | 0 |
| 190238 | 1 | 0 | 0 | 0 | 0 |
| 193194 | 1 | 0 | 0 | 0 | 0 |
| 193195 | 1 | 0 | 0 | 0 | 0 |
| 193196 | 1 | 0 | 0 | 0 | 0 |
| 196197 | 1 | 0 | 0 | 0 | 0 |
| 196198 | 1 | 0 | 0 | 0 | 0 |
| 196199 | 1 | 0 | 0 | 0 | 0 |
| 199200 | 1 | 0 | 0 | 0 | 0 |
| 199207 | 2 | 0 | 0 | 0 | 0 |
| 200201 | 1 | 0 | 0 | 0 | 0 |
| 201202 | 1 | 0 | 0 | 0 | 0 |
| 201203 | 1 | 0 | 0 | 0 | 0 |
| 201204 | 1 | 0 | 0 | 0 | 0 |
| 204205 | 1 | 0 | 0 | 0 | 0 |
| 204206 | 1 | 0 | 0 | 0 | 0 |
| 204208 | 1 | 0 | 0 | 0 | 0 |
| 208209 | 1 | 0 | 0 | 0 | 0 |
| 209210 | 1 | 0 | 0 | 0 | 0 |
| 209217 | 2 | 0 | 0 | 0 | 0 |
| 210211 | 1 | 0 | 0 | 0 | 0 |
| 210212 | 2 | 0 | 0 | 0 | 0 |
| 212213 | 1 | 0 | 0 | 0 | 0 |
| 212214 | 1 | 0 | 0 | 0 | 0 |
| 214215 | 2 | 0 | 0 | 0 | 0 |
| 214219 | 1 | 0 | 0 | 0 | 0 |
| 215216 | 1 | 0 | 0 | 0 | 0 |
| 215217 | 1 | 0 | 0 | 0 | 0 |
| 217218 | 1 | 0 | 0 | 0 | 0 |
| 219220 | 1 | 0 | 0 | 0 | 0 |
| 219221 | 1 | 0 | 0 | 0 | 0 |
| 219225 | 1 | 0 | 0 | 0 | 0 |
| 220229 | 1 | 0 | 0 | 0 | 0 |
| 220236 | 2 | 0 | 0 | 0 | 0 |
| 221222 | 1 | 0 | 0 | 0 | 0 |
| 221223 | 1 | 0 | 0 | 0 | 0 |
| 221224 | 1 | 0 | 0 | 0 | 0 |
| 225226 | 1 | 0 | 0 | 0 | 0 |
| 225227 | 1 | 0 | 0 | 0 | 0 |
| 225228 | 1 | 0 | 0 | 0 | 0 |
| 229230 | 1 | 0 | 0 | 0 | 0 |
| 229231 | 2 | 0 | 0 | 0 | 0 |
| 231232 | 1 | 0 | 0 | 0 | 0 |
| 231233 | 1 | 0 | 0 | 0 | 0 |
| 233234 | 2 | 0 | 0 | 0 | 0 |
| 233238 | 1 | 0 | 0 | 0 | 0 |
| 234235 | 1 | 0 | 0 | 0 | 0 |
| 234236 | 1 | 0 | 0 | 0 | 0 |
| 236237 | 1 | 0 | 0 | 0 | 0 |
| 239240 | 1 | 0 | 0 | 0 | 0 |
| 239241 | 1 | 0 | 0 | 0 | 0 |
| 241242 | 1 | 0 | 0 | 0 | 0 |
| 241243 | 1 | 0 | 0 | 0 | 0 |
| 241244 | 1 | 0 | 0 | 0 | 0 |
| 244245 | 1 | 0 | 0 | 0 | 0 |
| 244246 | 1 | 0 | 0 | 0 | 0 |
| 244247 | 1 | 0 | 0 | 0 | 0 |
| 247248 | 1 | 0 | 0 | 0 | 0 |
| 247249 | 1 | 0 | 0 | 0 | 0 |
| 247250 | 1 | 0 | 0 | 0 | 0 |

|        |   |   |   |   |   |
|--------|---|---|---|---|---|
| 250251 | 1 | 0 | 0 | 0 | 0 |
| 250252 | 1 | 0 | 0 | 0 | 0 |
| 250253 | 1 | 0 | 0 | 0 | 0 |
| 253254 | 1 | 0 | 0 | 0 | 0 |
| 253255 | 1 | 0 | 0 | 0 | 0 |
| 253256 | 1 | 0 | 0 | 0 | 0 |
| 256272 | 1 | 0 | 0 | 0 | 0 |
| 257258 | 1 | 0 | 0 | 0 | 0 |
| 257259 | 1 | 0 | 0 | 0 | 0 |
| 257260 | 1 | 0 | 0 | 0 | 0 |
| 257269 | 1 | 0 | 0 | 0 | 0 |
| 260261 | 1 | 0 | 0 | 0 | 0 |
| 261262 | 1 | 0 | 0 | 0 | 0 |
| 261268 | 2 | 0 | 0 | 0 | 0 |
| 262263 | 1 | 0 | 0 | 0 | 0 |
| 262264 | 1 | 0 | 0 | 0 | 0 |
| 262265 | 1 | 0 | 0 | 0 | 0 |
| 265266 | 1 | 0 | 0 | 0 | 0 |
| 265267 | 1 | 0 | 0 | 0 | 0 |
| 265335 | 1 | 0 | 0 | 0 | 0 |
| 269270 | 1 | 0 | 0 | 0 | 0 |
| 269271 | 1 | 0 | 0 | 0 | 0 |
| 269317 | 1 | 0 | 0 | 0 | 0 |
| 272273 | 1 | 0 | 0 | 0 | 0 |
| 272274 | 1 | 0 | 0 | 0 | 0 |
| 272275 | 1 | 0 | 0 | 0 | 0 |
| 275276 | 1 | 0 | 0 | 0 | 0 |
| 275277 | 1 | 0 | 0 | 0 | 0 |
| 275278 | 1 | 0 | 0 | 0 | 0 |
| 278279 | 1 | 0 | 0 | 0 | 0 |
| 278286 | 2 | 0 | 0 | 0 | 0 |
| 279280 | 1 | 0 | 0 | 0 | 0 |
| 280281 | 1 | 0 | 0 | 0 | 0 |
| 280282 | 1 | 0 | 0 | 0 | 0 |
| 280283 | 1 | 0 | 0 | 0 | 0 |
| 283284 | 1 | 0 | 0 | 0 | 0 |
| 283285 | 1 | 0 | 0 | 0 | 0 |
| 283287 | 1 | 0 | 0 | 0 | 0 |
| 287288 | 1 | 0 | 0 | 0 | 0 |
| 288289 | 1 | 0 | 0 | 0 | 0 |
| 288296 | 2 | 0 | 0 | 0 | 0 |
| 289290 | 1 | 0 | 0 | 0 | 0 |
| 289291 | 2 | 0 | 0 | 0 | 0 |
| 291292 | 1 | 0 | 0 | 0 | 0 |
| 291293 | 1 | 0 | 0 | 0 | 0 |
| 293294 | 2 | 0 | 0 | 0 | 0 |
| 293298 | 1 | 0 | 0 | 0 | 0 |
| 294295 | 1 | 0 | 0 | 0 | 0 |
| 294296 | 1 | 0 | 0 | 0 | 0 |
| 296297 | 1 | 0 | 0 | 0 | 0 |
| 298299 | 1 | 0 | 0 | 0 | 0 |
| 298300 | 1 | 0 | 0 | 0 | 0 |
| 298304 | 1 | 0 | 0 | 0 | 0 |
| 299308 | 1 | 0 | 0 | 0 | 0 |
| 299315 | 2 | 0 | 0 | 0 | 0 |
| 300301 | 1 | 0 | 0 | 0 | 0 |
| 300302 | 1 | 0 | 0 | 0 | 0 |
| 300303 | 1 | 0 | 0 | 0 | 0 |
| 304305 | 1 | 0 | 0 | 0 | 0 |
| 304306 | 1 | 0 | 0 | 0 | 0 |
| 304307 | 1 | 0 | 0 | 0 | 0 |
| 308309 | 1 | 0 | 0 | 0 | 0 |
| 308310 | 2 | 0 | 0 | 0 | 0 |
| 310311 | 1 | 0 | 0 | 0 | 0 |
| 310312 | 1 | 0 | 0 | 0 | 0 |
| 312313 | 2 | 0 | 0 | 0 | 0 |
| 312317 | 1 | 0 | 0 | 0 | 0 |
| 313314 | 1 | 0 | 0 | 0 | 0 |
| 313315 | 1 | 0 | 0 | 0 | 0 |
| 315316 | 1 | 0 | 0 | 0 | 0 |
| 318319 | 1 | 0 | 0 | 0 | 0 |
| 318320 | 1 | 0 | 0 | 0 | 0 |
| 320321 | 1 | 0 | 0 | 0 | 0 |
| 320322 | 1 | 0 | 0 | 0 | 0 |
| 320323 | 1 | 0 | 0 | 0 | 0 |
| 323324 | 1 | 0 | 0 | 0 | 0 |
| 323325 | 1 | 0 | 0 | 0 | 0 |
| 323326 | 1 | 0 | 0 | 0 | 0 |
| 326327 | 1 | 0 | 0 | 0 | 0 |
| 326328 | 1 | 0 | 0 | 0 | 0 |
| 326329 | 1 | 0 | 0 | 0 | 0 |



|        |   |   |   |   |   |
|--------|---|---|---|---|---|
| 329330 | 1 | 0 | 0 | 0 | 0 |
| 329331 | 1 | 0 | 0 | 0 | 0 |
| 329332 | 1 | 0 | 0 | 0 | 0 |
| 332333 | 1 | 0 | 0 | 0 | 0 |
| 332334 | 1 | 0 | 0 | 0 | 0 |
| 332335 | 1 | 0 | 0 | 0 | 0 |
| 335351 | 1 | 0 | 0 | 0 | 0 |
| 336337 | 1 | 0 | 0 | 0 | 0 |
| 336338 | 1 | 0 | 0 | 0 | 0 |
| 336339 | 1 | 0 | 0 | 0 | 0 |
| 336348 | 1 | 0 | 0 | 0 | 0 |
| 339340 | 1 | 0 | 0 | 0 | 0 |
| 340341 | 1 | 0 | 0 | 0 | 0 |
| 340347 | 2 | 0 | 0 | 0 | 0 |
| 341342 | 1 | 0 | 0 | 0 | 0 |
| 341343 | 1 | 0 | 0 | 0 | 0 |
| 341344 | 1 | 0 | 0 | 0 | 0 |
| 344345 | 1 | 0 | 0 | 0 | 0 |
| 344346 | 1 | 0 | 0 | 0 | 0 |
| 344414 | 1 | 0 | 0 | 0 | 0 |
| 348349 | 1 | 0 | 0 | 0 | 0 |
| 348350 | 1 | 0 | 0 | 0 | 0 |
| 348396 | 1 | 0 | 0 | 0 | 0 |
| 351352 | 1 | 0 | 0 | 0 | 0 |
| 351353 | 1 | 0 | 0 | 0 | 0 |
| 351354 | 1 | 0 | 0 | 0 | 0 |
| 354355 | 1 | 0 | 0 | 0 | 0 |
| 354356 | 1 | 0 | 0 | 0 | 0 |
| 354357 | 1 | 0 | 0 | 0 | 0 |
| 357358 | 1 | 0 | 0 | 0 | 0 |
| 357365 | 2 | 0 | 0 | 0 | 0 |
| 358359 | 1 | 0 | 0 | 0 | 0 |
| 359360 | 1 | 0 | 0 | 0 | 0 |
| 359361 | 1 | 0 | 0 | 0 | 0 |
| 359362 | 1 | 0 | 0 | 0 | 0 |
| 362363 | 1 | 0 | 0 | 0 | 0 |
| 362364 | 1 | 0 | 0 | 0 | 0 |
| 362366 | 1 | 0 | 0 | 0 | 0 |
| 366367 | 1 | 0 | 0 | 0 | 0 |
| 367368 | 1 | 0 | 0 | 0 | 0 |
| 367375 | 2 | 0 | 0 | 0 | 0 |
| 368369 | 1 | 0 | 0 | 0 | 0 |
| 368370 | 2 | 0 | 0 | 0 | 0 |
| 370371 | 1 | 0 | 0 | 0 | 0 |
| 370372 | 1 | 0 | 0 | 0 | 0 |
| 372373 | 2 | 0 | 0 | 0 | 0 |
| 372377 | 1 | 0 | 0 | 0 | 0 |
| 373374 | 1 | 0 | 0 | 0 | 0 |
| 373375 | 1 | 0 | 0 | 0 | 0 |
| 375376 | 1 | 0 | 0 | 0 | 0 |
| 377378 | 1 | 0 | 0 | 0 | 0 |
| 377379 | 1 | 0 | 0 | 0 | 0 |
| 377383 | 1 | 0 | 0 | 0 | 0 |
| 378387 | 1 | 0 | 0 | 0 | 0 |
| 378394 | 2 | 0 | 0 | 0 | 0 |
| 379380 | 1 | 0 | 0 | 0 | 0 |
| 379381 | 1 | 0 | 0 | 0 | 0 |
| 379382 | 1 | 0 | 0 | 0 | 0 |
| 383384 | 1 | 0 | 0 | 0 | 0 |
| 383385 | 1 | 0 | 0 | 0 | 0 |
| 383386 | 1 | 0 | 0 | 0 | 0 |
| 387388 | 1 | 0 | 0 | 0 | 0 |
| 387389 | 2 | 0 | 0 | 0 | 0 |
| 389390 | 1 | 0 | 0 | 0 | 0 |
| 389391 | 1 | 0 | 0 | 0 | 0 |
| 391392 | 2 | 0 | 0 | 0 | 0 |
| 391396 | 1 | 0 | 0 | 0 | 0 |
| 392393 | 1 | 0 | 0 | 0 | 0 |
| 392394 | 1 | 0 | 0 | 0 | 0 |
| 394395 | 1 | 0 | 0 | 0 | 0 |
| 397398 | 1 | 0 | 0 | 0 | 0 |
| 397399 | 1 | 0 | 0 | 0 | 0 |
| 399400 | 1 | 0 | 0 | 0 | 0 |
| 399401 | 1 | 0 | 0 | 0 | 0 |
| 399402 | 1 | 0 | 0 | 0 | 0 |
| 402403 | 1 | 0 | 0 | 0 | 0 |
| 402404 | 1 | 0 | 0 | 0 | 0 |
| 402405 | 1 | 0 | 0 | 0 | 0 |
| 405406 | 1 | 0 | 0 | 0 | 0 |
| 405407 | 1 | 0 | 0 | 0 | 0 |
| 405408 | 1 | 0 | 0 | 0 | 0 |

408409 1 0 0 0 0  
408410 1 0 0 0 0  
408411 1 0 0 0 0  
411412 1 0 0 0 0  
411413 1 0 0 0 0  
411414 1 0 0 0 0  
414415 1 0 0 0 0

M END  
> <NAME>  
D32\_12

\$\$\$  
D36\_12  
MOE2012 3D

433442 0 0 1 0 0 0 0 0999 V2000  
-1.0180 -5.0280 -18.2720 O 0 0 0 0 0 0 0 0 0 0 0 0 0 0 0  
-1.9000 -4.8010 -18.6110 H 0 0 0 0 0 0 0 0 0 0 0 0 0 0 0  
-0.2090 -5.3440 -19.3970 C 0 0 0 0 0 0 0 0 0 0 0 0 0 0 0  
-0.6670 -6.1830 -19.9300 H 0 0 0 0 0 0 0 0 0 0 0 0 0 0 0  
-0.1820 -4.4730 -20.0610 H 0 0 0 0 0 0 0 0 0 0 0 0 0 0 0  
1.1920 -5.7040 -18.9190 C 0 0 0 0 0 0 0 0 0 0 0 0 0 0 0  
1.6080 -4.8640 -18.3500 H 0 0 0 0 0 0 0 0 0 0 0 0 0 0 0  
1.1300 -6.5420 -18.2140 H 0 0 0 0 0 0 0 0 0 0 0 0 0 0 0  
2.1130 -6.0610 -20.0850 C 0 0 0 0 0 0 0 0 0 0 0 0 0 0 0  
1.6880 -6.9050 -20.6420 H 0 0 0 0 0 0 0 0 0 0 0 0 0 0 0  
2.1720 -5.2140 -20.7790 H 0 0 0 0 0 0 0 0 0 0 0 0 0 0 0  
3.5200 -6.4240 -19.6010 C 0 0 0 0 0 0 0 0 0 0 0 0 0 0 0  
3.9480 -5.5780 -19.0510 H 0 0 0 0 0 0 0 0 0 0 0 0 0 0 0  
3.4600 -7.2680 -18.9020 H 0 0 0 0 0 0 0 0 0 0 0 0 0 0 0  
4.4360 -6.7930 -20.7720 C 0 0 0 0 0 0 0 0 0 0 0 0 0 0 0  
4.0000 -7.6360 -21.3220 H 0 0 0 0 0 0 0 0 0 0 0 0 0 0 0  
4.4950 -5.9480 -21.4690 H 0 0 0 0 0 0 0 0 0 0 0 0 0 0 0  
5.8420 -7.1620 -20.2870 C 0 0 0 0 0 0 0 0 0 0 0 0 0 0 0  
6.2750 -6.3110 -19.7490 H 0 0 0 0 0 0 0 0 0 0 0 0 0 0 0  
5.7780 -8.0080 -19.5930 H 0 0 0 0 0 0 0 0 0 0 0 0 0 0 0  
6.6860 -7.5100 -21.4330 N 0 0 3 0 0 0 0 0 0 0 0 0 0 0 0  
6.2530 -8.2780 -21.9460 H 0 0 0 0 0 0 0 0 0 0 0 0 0 0 0  
24.2060 -8.3950 -17.3390 C 0 0 0 0 0 0 0 0 0 0 0 0 0 0 0  
23.8730 -8.7840 -18.3080 H 0 0 0 0 0 0 0 0 0 0 0 0 0 0 0  
23.8110 -9.0920 -16.5890 H 0 0 0 0 0 0 0 0 0 0 0 0 0 0 0  
25.6430 -8.4030 -17.3530 O 0 0 0 0 0 0 0 0 0 0 0 0 0 0 0  
26.2540 -8.4510 -16.1340 C 0 0 0 0 0 0 0 0 0 0 0 0 0 0 0  
27.7520 -8.4660 -16.3240 C 0 0 0 0 0 0 0 0 0 0 0 0 0 0 0  
28.0220 -9.4260 -16.7750 H 0 0 0 0 0 0 0 0 0 0 0 0 0 0 0  
28.0080 -7.6580 -17.0170 H 0 0 0 0 0 0 0 0 0 0 0 0 0 0 0  
28.4700 -8.2620 -14.9840 C 0 0 0 0 0 0 0 0 0 0 0 0 0 0 0  
28.1210 -7.3220 -14.5350 H 0 0 0 0 0 0 0 0 0 0 0 0 0 0 0  
28.1540 -9.0380 -14.2750 H 0 0 0 0 0 0 0 0 0 0 0 0 0 0 0  
25.6780 -8.4800 -15.0560 O 0 0 0 0 0 0 0 0 0 0 0 0 0 0 0  
23.6720 -6.9830 -17.1200 C 0 0 0 0 0 0 0 0 0 0 0 0 0 0 0  
23.9550 -6.6480 -16.1150 H 0 0 0 0 0 0 0 0 0 0 0 0 0 0 0  
24.1360 -6.2530 -17.7940 H 0 0 0 0 0 0 0 0 0 0 0 0 0 0 0  
8.0310 -7.8940 -21.0010 C 0 0 0 0 0 0 0 0 0 0 0 0 0 0 0  
8.4920 -7.0740 -20.4360 H 0 0 0 0 0 0 0 0 0 0 0 0 0 0 0  
7.9820 -8.7670 -20.3390 H 0 0 0 0 0 0 0 0 0 0 0 0 0 0 0  
8.8930 -8.2160 -22.2190 C 0 0 0 0 0 0 0 0 0 0 0 0 0 0 0  
8.4480 -9.0430 -22.7860 H 0 0 0 0 0 0 0 0 0 0 0 0 0 0 0  
8.9720 -7.3370 -22.8690 H 0 0 0 0 0 0 0 0 0 0 0 0 0 0 0  
10.2830 -8.6250 -21.8050 C 0 0 0 0 0 0 0 0 0 0 0 0 0 0 0  
11.0100 -8.9460 -22.9140 O 0 0 0 0 0 0 0 0 0 0 0 0 0 0 0  
12.3440 -9.4170 -22.6750 C 0 0 0 0 0 0 0 0 0 0 0 0 0 0 0  
12.3760 -10.1060 -21.8210 H 0 0 0 0 0 0 0 0 0 0 0 0 0 0 0  
12.6390 -10.0130 -23.5470 H 0 0 0 0 0 0 0 0 0 0 0 0 0 0 0  
13.3180 -8.2580 -22.4930 C 0 0 0 0 0 0 0 0 0 0 0 0 0 0 0  
13.2580 -7.5990 -23.3680 H 0 0 0 0 0 0 0 0 0 0 0 0 0 0 0  
13.0470 -7.6830 -21.6000 H 0 0 0 0 0 0 0 0 0 0 0 0 0 0 0  
10.7000 -8.6600 -20.6560 O 0 0 0 0 0 0 0 0 0 0 0 0 0 0 0  
14.6290 -8.8020 -22.3570 O 0 0 0 0 0 0 0 0 0 0 0 0 0 0 0  
15.6640 -7.9180 -22.2310 C 0 0 0 0 0 0 0 0 0 0 0 0 0 0 0  
16.9280 -8.5020 -22.1700 C 0 0 0 0 0 0 0 0 0 0 0 0 0 0 0  
17.0260 -9.5840 -22.2240 H 0 0 0 0 0 0 0 0 0 0 0 0 0 0 0  
18.0730 -7.7110 -22.0460 C 0 0 0 0 0 0 0 0 0 0 0 0 0 0 0  
19.0420 -8.2060 -22.0040 H 0 0 0 0 0 0 0 0 0 0 0 0 0 0 0  
17.9870 -6.3070 -21.9750 C 0 0 0 0 0 0 0 0 0 0 0 0 0 0 0  
16.7050 -5.7360 -22.0340 C 0 0 0 0 0 0 0 0 0 0 0 0 0 0 0  
16.5630 -4.6600 -21.9890 H 0 0 0 0 0 0 0 0 0 0 0 0 0 0 0  
15.5570 -6.5310 -22.1590 C 0 0 0 0 0 0 0 0 0 0 0 0 0 0 0  
14.5970 -6.0280 -22.1970 H 0 0 0 0 0 0 0 0 0 0 0 0 0 0 0  
19.2780 -5.4650 -21.8550 C 0 0 0 0 0 0 0 0 0 0 0 0 0 0 0  
20.1250 -5.9060 -20.6380 C 0 0 0 0 0 0 0 0 0 0 0 0 0 0 0











|     |     |   |   |   |   |   |
|-----|-----|---|---|---|---|---|
| 35  | 83  | 1 | 0 | 0 | 0 | 0 |
| 38  | 39  | 1 | 0 | 0 | 0 | 0 |
| 38  | 40  | 1 | 0 | 0 | 0 | 0 |
| 38  | 41  | 1 | 0 | 0 | 0 | 0 |
| 41  | 42  | 1 | 0 | 0 | 0 | 0 |
| 41  | 43  | 1 | 0 | 0 | 0 | 0 |
| 41  | 44  | 1 | 0 | 0 | 0 | 0 |
| 44  | 45  | 1 | 0 | 0 | 0 | 0 |
| 44  | 52  | 2 | 0 | 0 | 0 | 0 |
| 45  | 46  | 1 | 0 | 0 | 0 | 0 |
| 46  | 47  | 1 | 0 | 0 | 0 | 0 |
| 46  | 48  | 1 | 0 | 0 | 0 | 0 |
| 46  | 49  | 1 | 0 | 0 | 0 | 0 |
| 49  | 50  | 1 | 0 | 0 | 0 | 0 |
| 49  | 51  | 1 | 0 | 0 | 0 | 0 |
| 49  | 53  | 1 | 0 | 0 | 0 | 0 |
| 53  | 54  | 1 | 0 | 0 | 0 | 0 |
| 54  | 55  | 1 | 0 | 0 | 0 | 0 |
| 54  | 62  | 2 | 0 | 0 | 0 | 0 |
| 55  | 56  | 1 | 0 | 0 | 0 | 0 |
| 55  | 57  | 2 | 0 | 0 | 0 | 0 |
| 57  | 58  | 1 | 0 | 0 | 0 | 0 |
| 57  | 59  | 1 | 0 | 0 | 0 | 0 |
| 59  | 60  | 2 | 0 | 0 | 0 | 0 |
| 59  | 64  | 1 | 0 | 0 | 0 | 0 |
| 60  | 61  | 1 | 0 | 0 | 0 | 0 |
| 60  | 62  | 1 | 0 | 0 | 0 | 0 |
| 62  | 63  | 1 | 0 | 0 | 0 | 0 |
| 64  | 65  | 1 | 0 | 0 | 0 | 0 |
| 64  | 66  | 1 | 0 | 0 | 0 | 0 |
| 64  | 70  | 1 | 0 | 0 | 0 | 0 |
| 65  | 74  | 1 | 0 | 0 | 0 | 0 |
| 65  | 81  | 2 | 0 | 0 | 0 | 0 |
| 66  | 67  | 1 | 0 | 0 | 0 | 0 |
| 66  | 68  | 1 | 0 | 0 | 0 | 0 |
| 66  | 69  | 1 | 0 | 0 | 0 | 0 |
| 70  | 71  | 1 | 0 | 0 | 0 | 0 |
| 70  | 72  | 1 | 0 | 0 | 0 | 0 |
| 70  | 73  | 1 | 0 | 0 | 0 | 0 |
| 74  | 75  | 1 | 0 | 0 | 0 | 0 |
| 74  | 76  | 2 | 0 | 0 | 0 | 0 |
| 76  | 77  | 1 | 0 | 0 | 0 | 0 |
| 76  | 78  | 1 | 0 | 0 | 0 | 0 |
| 78  | 79  | 2 | 0 | 0 | 0 | 0 |
| 78  | 83  | 1 | 0 | 0 | 0 | 0 |
| 79  | 80  | 1 | 0 | 0 | 0 | 0 |
| 79  | 81  | 1 | 0 | 0 | 0 | 0 |
| 81  | 82  | 1 | 0 | 0 | 0 | 0 |
| 84  | 85  | 1 | 0 | 0 | 0 | 0 |
| 84  | 86  | 1 | 0 | 0 | 0 | 0 |
| 86  | 87  | 1 | 0 | 0 | 0 | 0 |
| 86  | 88  | 1 | 0 | 0 | 0 | 0 |
| 86  | 89  | 1 | 0 | 0 | 0 | 0 |
| 89  | 90  | 1 | 0 | 0 | 0 | 0 |
| 89  | 91  | 1 | 0 | 0 | 0 | 0 |
| 89  | 92  | 1 | 0 | 0 | 0 | 0 |
| 92  | 93  | 1 | 0 | 0 | 0 | 0 |
| 92  | 94  | 1 | 0 | 0 | 0 | 0 |
| 92  | 95  | 1 | 0 | 0 | 0 | 0 |
| 95  | 96  | 1 | 0 | 0 | 0 | 0 |
| 95  | 97  | 1 | 0 | 0 | 0 | 0 |
| 95  | 98  | 1 | 0 | 0 | 0 | 0 |
| 98  | 99  | 1 | 0 | 0 | 0 | 0 |
| 98  | 100 | 1 | 0 | 0 | 0 | 0 |
| 98  | 101 | 1 | 0 | 0 | 0 | 0 |
| 101 | 102 | 1 | 0 | 0 | 0 | 0 |
| 101 | 103 | 1 | 0 | 0 | 0 | 0 |
| 101 | 104 | 1 | 0 | 0 | 0 | 0 |
| 104 | 120 | 1 | 0 | 0 | 0 | 0 |
| 105 | 106 | 1 | 0 | 0 | 0 | 0 |
| 105 | 107 | 1 | 0 | 0 | 0 | 0 |
| 105 | 108 | 1 | 0 | 0 | 0 | 0 |
| 105 | 117 | 1 | 0 | 0 | 0 | 0 |
| 108 | 109 | 1 | 0 | 0 | 0 | 0 |
| 109 | 110 | 1 | 0 | 0 | 0 | 0 |
| 109 | 116 | 2 | 0 | 0 | 0 | 0 |
| 110 | 111 | 1 | 0 | 0 | 0 | 0 |
| 110 | 112 | 1 | 0 | 0 | 0 | 0 |
| 110 | 113 | 1 | 0 | 0 | 0 | 0 |
| 113 | 114 | 1 | 0 | 0 | 0 | 0 |
| 113 | 115 | 1 | 0 | 0 | 0 | 0 |



|        |   |   |   |   |   |
|--------|---|---|---|---|---|
| 113186 | 1 | 0 | 0 | 0 | 0 |
| 117118 | 1 | 0 | 0 | 0 | 0 |
| 117119 | 1 | 0 | 0 | 0 | 0 |
| 117165 | 1 | 0 | 0 | 0 | 0 |
| 120121 | 1 | 0 | 0 | 0 | 0 |
| 120122 | 1 | 0 | 0 | 0 | 0 |
| 120123 | 1 | 0 | 0 | 0 | 0 |
| 123124 | 1 | 0 | 0 | 0 | 0 |
| 123125 | 1 | 0 | 0 | 0 | 0 |
| 123126 | 1 | 0 | 0 | 0 | 0 |
| 126127 | 1 | 0 | 0 | 0 | 0 |
| 126134 | 2 | 0 | 0 | 0 | 0 |
| 127128 | 1 | 0 | 0 | 0 | 0 |
| 128129 | 1 | 0 | 0 | 0 | 0 |
| 128130 | 1 | 0 | 0 | 0 | 0 |
| 128131 | 1 | 0 | 0 | 0 | 0 |
| 131132 | 1 | 0 | 0 | 0 | 0 |
| 131133 | 1 | 0 | 0 | 0 | 0 |
| 131135 | 1 | 0 | 0 | 0 | 0 |
| 135136 | 1 | 0 | 0 | 0 | 0 |
| 136137 | 1 | 0 | 0 | 0 | 0 |
| 136144 | 2 | 0 | 0 | 0 | 0 |
| 137138 | 1 | 0 | 0 | 0 | 0 |
| 137139 | 2 | 0 | 0 | 0 | 0 |
| 139140 | 1 | 0 | 0 | 0 | 0 |
| 139141 | 1 | 0 | 0 | 0 | 0 |
| 141142 | 2 | 0 | 0 | 0 | 0 |
| 141146 | 1 | 0 | 0 | 0 | 0 |
| 142143 | 1 | 0 | 0 | 0 | 0 |
| 142144 | 1 | 0 | 0 | 0 | 0 |
| 144145 | 1 | 0 | 0 | 0 | 0 |
| 146147 | 1 | 0 | 0 | 0 | 0 |
| 146148 | 1 | 0 | 0 | 0 | 0 |
| 146152 | 1 | 0 | 0 | 0 | 0 |
| 147156 | 1 | 0 | 0 | 0 | 0 |
| 147163 | 2 | 0 | 0 | 0 | 0 |
| 148149 | 1 | 0 | 0 | 0 | 0 |
| 148150 | 1 | 0 | 0 | 0 | 0 |
| 148151 | 1 | 0 | 0 | 0 | 0 |
| 152153 | 1 | 0 | 0 | 0 | 0 |
| 152154 | 1 | 0 | 0 | 0 | 0 |
| 152155 | 1 | 0 | 0 | 0 | 0 |
| 156157 | 1 | 0 | 0 | 0 | 0 |
| 156158 | 2 | 0 | 0 | 0 | 0 |
| 158159 | 1 | 0 | 0 | 0 | 0 |
| 158160 | 1 | 0 | 0 | 0 | 0 |
| 160161 | 2 | 0 | 0 | 0 | 0 |
| 160165 | 1 | 0 | 0 | 0 | 0 |
| 161162 | 1 | 0 | 0 | 0 | 0 |
| 161163 | 1 | 0 | 0 | 0 | 0 |
| 163164 | 1 | 0 | 0 | 0 | 0 |
| 166167 | 1 | 0 | 0 | 0 | 0 |
| 166168 | 1 | 0 | 0 | 0 | 0 |
| 168169 | 1 | 0 | 0 | 0 | 0 |
| 168170 | 1 | 0 | 0 | 0 | 0 |
| 168171 | 1 | 0 | 0 | 0 | 0 |
| 171172 | 1 | 0 | 0 | 0 | 0 |
| 171173 | 1 | 0 | 0 | 0 | 0 |
| 171174 | 1 | 0 | 0 | 0 | 0 |
| 174175 | 1 | 0 | 0 | 0 | 0 |
| 174176 | 1 | 0 | 0 | 0 | 0 |
| 174177 | 1 | 0 | 0 | 0 | 0 |
| 177178 | 1 | 0 | 0 | 0 | 0 |
| 177179 | 1 | 0 | 0 | 0 | 0 |
| 177180 | 1 | 0 | 0 | 0 | 0 |
| 180181 | 1 | 0 | 0 | 0 | 0 |
| 180182 | 1 | 0 | 0 | 0 | 0 |
| 180183 | 1 | 0 | 0 | 0 | 0 |
| 183184 | 1 | 0 | 0 | 0 | 0 |
| 183185 | 1 | 0 | 0 | 0 | 0 |
| 183186 | 1 | 0 | 0 | 0 | 0 |
| 186202 | 1 | 0 | 0 | 0 | 0 |
| 187188 | 1 | 0 | 0 | 0 | 0 |
| 187189 | 1 | 0 | 0 | 0 | 0 |
| 187190 | 1 | 0 | 0 | 0 | 0 |
| 187199 | 1 | 0 | 0 | 0 | 0 |
| 190191 | 1 | 0 | 0 | 0 | 0 |
| 191192 | 1 | 0 | 0 | 0 | 0 |
| 191198 | 2 | 0 | 0 | 0 | 0 |
| 192193 | 1 | 0 | 0 | 0 | 0 |
| 192194 | 1 | 0 | 0 | 0 | 0 |

|        |   |   |   |   |   |
|--------|---|---|---|---|---|
| 192195 | 1 | 0 | 0 | 0 | 0 |
| 195196 | 1 | 0 | 0 | 0 | 0 |
| 195197 | 1 | 0 | 0 | 0 | 0 |
| 195268 | 1 | 0 | 0 | 0 | 0 |
| 199200 | 1 | 0 | 0 | 0 | 0 |
| 199201 | 1 | 0 | 0 | 0 | 0 |
| 199247 | 1 | 0 | 0 | 0 | 0 |
| 202203 | 1 | 0 | 0 | 0 | 0 |
| 202204 | 1 | 0 | 0 | 0 | 0 |
| 202205 | 1 | 0 | 0 | 0 | 0 |
| 205206 | 1 | 0 | 0 | 0 | 0 |
| 205207 | 1 | 0 | 0 | 0 | 0 |
| 205208 | 1 | 0 | 0 | 0 | 0 |
| 208209 | 1 | 0 | 0 | 0 | 0 |
| 208216 | 2 | 0 | 0 | 0 | 0 |
| 209210 | 1 | 0 | 0 | 0 | 0 |
| 210211 | 1 | 0 | 0 | 0 | 0 |
| 210212 | 1 | 0 | 0 | 0 | 0 |
| 210213 | 1 | 0 | 0 | 0 | 0 |
| 213214 | 1 | 0 | 0 | 0 | 0 |
| 213215 | 1 | 0 | 0 | 0 | 0 |
| 213217 | 1 | 0 | 0 | 0 | 0 |
| 217218 | 1 | 0 | 0 | 0 | 0 |
| 218219 | 1 | 0 | 0 | 0 | 0 |
| 218226 | 2 | 0 | 0 | 0 | 0 |
| 219220 | 1 | 0 | 0 | 0 | 0 |
| 219221 | 2 | 0 | 0 | 0 | 0 |
| 221222 | 1 | 0 | 0 | 0 | 0 |
| 221223 | 1 | 0 | 0 | 0 | 0 |
| 223224 | 2 | 0 | 0 | 0 | 0 |
| 223228 | 1 | 0 | 0 | 0 | 0 |
| 224225 | 1 | 0 | 0 | 0 | 0 |
| 224226 | 1 | 0 | 0 | 0 | 0 |
| 226227 | 1 | 0 | 0 | 0 | 0 |
| 228229 | 1 | 0 | 0 | 0 | 0 |
| 228230 | 1 | 0 | 0 | 0 | 0 |
| 228234 | 1 | 0 | 0 | 0 | 0 |
| 229238 | 1 | 0 | 0 | 0 | 0 |
| 229245 | 2 | 0 | 0 | 0 | 0 |
| 230231 | 1 | 0 | 0 | 0 | 0 |
| 230232 | 1 | 0 | 0 | 0 | 0 |
| 230233 | 1 | 0 | 0 | 0 | 0 |
| 234235 | 1 | 0 | 0 | 0 | 0 |
| 234236 | 1 | 0 | 0 | 0 | 0 |
| 234237 | 1 | 0 | 0 | 0 | 0 |
| 238239 | 1 | 0 | 0 | 0 | 0 |
| 238240 | 2 | 0 | 0 | 0 | 0 |
| 240241 | 1 | 0 | 0 | 0 | 0 |
| 240242 | 1 | 0 | 0 | 0 | 0 |
| 242243 | 2 | 0 | 0 | 0 | 0 |
| 242247 | 1 | 0 | 0 | 0 | 0 |
| 243244 | 1 | 0 | 0 | 0 | 0 |
| 243245 | 1 | 0 | 0 | 0 | 0 |
| 245246 | 1 | 0 | 0 | 0 | 0 |
| 248249 | 1 | 0 | 0 | 0 | 0 |
| 248250 | 1 | 0 | 0 | 0 | 0 |
| 250251 | 1 | 0 | 0 | 0 | 0 |
| 250252 | 1 | 0 | 0 | 0 | 0 |
| 250253 | 1 | 0 | 0 | 0 | 0 |
| 253254 | 1 | 0 | 0 | 0 | 0 |
| 253255 | 1 | 0 | 0 | 0 | 0 |
| 253256 | 1 | 0 | 0 | 0 | 0 |
| 256257 | 1 | 0 | 0 | 0 | 0 |
| 256258 | 1 | 0 | 0 | 0 | 0 |
| 256259 | 1 | 0 | 0 | 0 | 0 |
| 259260 | 1 | 0 | 0 | 0 | 0 |
| 259261 | 1 | 0 | 0 | 0 | 0 |
| 259262 | 1 | 0 | 0 | 0 | 0 |
| 262263 | 1 | 0 | 0 | 0 | 0 |
| 262264 | 1 | 0 | 0 | 0 | 0 |
| 262265 | 1 | 0 | 0 | 0 | 0 |
| 265266 | 1 | 0 | 0 | 0 | 0 |
| 265267 | 1 | 0 | 0 | 0 | 0 |
| 265268 | 1 | 0 | 0 | 0 | 0 |
| 268284 | 1 | 0 | 0 | 0 | 0 |
| 269270 | 1 | 0 | 0 | 0 | 0 |
| 269271 | 1 | 0 | 0 | 0 | 0 |
| 269272 | 1 | 0 | 0 | 0 | 0 |
| 269281 | 1 | 0 | 0 | 0 | 0 |
| 272273 | 1 | 0 | 0 | 0 | 0 |
| 273274 | 1 | 0 | 0 | 0 | 0 |

|        |   |   |   |   |   |
|--------|---|---|---|---|---|
| 273280 | 2 | 0 | 0 | 0 | 0 |
| 274275 | 1 | 0 | 0 | 0 | 0 |
| 274276 | 1 | 0 | 0 | 0 | 0 |
| 274277 | 1 | 0 | 0 | 0 | 0 |
| 277278 | 1 | 0 | 0 | 0 | 0 |
| 277279 | 1 | 0 | 0 | 0 | 0 |
| 277350 | 1 | 0 | 0 | 0 | 0 |
| 281282 | 1 | 0 | 0 | 0 | 0 |
| 281283 | 1 | 0 | 0 | 0 | 0 |
| 281329 | 1 | 0 | 0 | 0 | 0 |
| 284285 | 1 | 0 | 0 | 0 | 0 |
| 284286 | 1 | 0 | 0 | 0 | 0 |
| 284287 | 1 | 0 | 0 | 0 | 0 |
| 287288 | 1 | 0 | 0 | 0 | 0 |
| 287289 | 1 | 0 | 0 | 0 | 0 |
| 287290 | 1 | 0 | 0 | 0 | 0 |
| 290291 | 1 | 0 | 0 | 0 | 0 |
| 290298 | 2 | 0 | 0 | 0 | 0 |
| 291292 | 1 | 0 | 0 | 0 | 0 |
| 292293 | 1 | 0 | 0 | 0 | 0 |
| 292294 | 1 | 0 | 0 | 0 | 0 |
| 292295 | 1 | 0 | 0 | 0 | 0 |
| 295296 | 1 | 0 | 0 | 0 | 0 |
| 295297 | 1 | 0 | 0 | 0 | 0 |
| 295299 | 1 | 0 | 0 | 0 | 0 |
| 299300 | 1 | 0 | 0 | 0 | 0 |
| 300301 | 1 | 0 | 0 | 0 | 0 |
| 300308 | 2 | 0 | 0 | 0 | 0 |
| 301302 | 1 | 0 | 0 | 0 | 0 |
| 301303 | 2 | 0 | 0 | 0 | 0 |
| 303304 | 1 | 0 | 0 | 0 | 0 |
| 303305 | 1 | 0 | 0 | 0 | 0 |
| 305306 | 2 | 0 | 0 | 0 | 0 |
| 305310 | 1 | 0 | 0 | 0 | 0 |
| 306307 | 1 | 0 | 0 | 0 | 0 |
| 306308 | 1 | 0 | 0 | 0 | 0 |
| 308309 | 1 | 0 | 0 | 0 | 0 |
| 310311 | 1 | 0 | 0 | 0 | 0 |
| 310312 | 1 | 0 | 0 | 0 | 0 |
| 310316 | 1 | 0 | 0 | 0 | 0 |
| 311320 | 1 | 0 | 0 | 0 | 0 |
| 311327 | 2 | 0 | 0 | 0 | 0 |
| 312313 | 1 | 0 | 0 | 0 | 0 |
| 312314 | 1 | 0 | 0 | 0 | 0 |
| 312315 | 1 | 0 | 0 | 0 | 0 |
| 316317 | 1 | 0 | 0 | 0 | 0 |
| 316318 | 1 | 0 | 0 | 0 | 0 |
| 316319 | 1 | 0 | 0 | 0 | 0 |
| 320321 | 1 | 0 | 0 | 0 | 0 |
| 320322 | 2 | 0 | 0 | 0 | 0 |
| 322323 | 1 | 0 | 0 | 0 | 0 |
| 322324 | 1 | 0 | 0 | 0 | 0 |
| 324325 | 2 | 0 | 0 | 0 | 0 |
| 324329 | 1 | 0 | 0 | 0 | 0 |
| 325326 | 1 | 0 | 0 | 0 | 0 |
| 325327 | 1 | 0 | 0 | 0 | 0 |
| 327328 | 1 | 0 | 0 | 0 | 0 |
| 330331 | 1 | 0 | 0 | 0 | 0 |
| 330332 | 1 | 0 | 0 | 0 | 0 |
| 332333 | 1 | 0 | 0 | 0 | 0 |
| 332334 | 1 | 0 | 0 | 0 | 0 |
| 332335 | 1 | 0 | 0 | 0 | 0 |
| 335336 | 1 | 0 | 0 | 0 | 0 |
| 335337 | 1 | 0 | 0 | 0 | 0 |
| 335338 | 1 | 0 | 0 | 0 | 0 |
| 338339 | 1 | 0 | 0 | 0 | 0 |
| 338340 | 1 | 0 | 0 | 0 | 0 |
| 338341 | 1 | 0 | 0 | 0 | 0 |
| 341342 | 1 | 0 | 0 | 0 | 0 |
| 341343 | 1 | 0 | 0 | 0 | 0 |
| 341344 | 1 | 0 | 0 | 0 | 0 |
| 344345 | 1 | 0 | 0 | 0 | 0 |
| 344346 | 1 | 0 | 0 | 0 | 0 |
| 344347 | 1 | 0 | 0 | 0 | 0 |
| 347348 | 1 | 0 | 0 | 0 | 0 |
| 347349 | 1 | 0 | 0 | 0 | 0 |
| 347350 | 1 | 0 | 0 | 0 | 0 |
| 350366 | 1 | 0 | 0 | 0 | 0 |
| 351352 | 1 | 0 | 0 | 0 | 0 |
| 351353 | 1 | 0 | 0 | 0 | 0 |
| 351354 | 1 | 0 | 0 | 0 | 0 |

|        |   |   |   |   |   |
|--------|---|---|---|---|---|
| 351363 | 1 | 0 | 0 | 0 | 0 |
| 354355 | 1 | 0 | 0 | 0 | 0 |
| 355356 | 1 | 0 | 0 | 0 | 0 |
| 355362 | 2 | 0 | 0 | 0 | 0 |
| 356357 | 1 | 0 | 0 | 0 | 0 |
| 356358 | 1 | 0 | 0 | 0 | 0 |
| 356359 | 1 | 0 | 0 | 0 | 0 |
| 359360 | 1 | 0 | 0 | 0 | 0 |
| 359361 | 1 | 0 | 0 | 0 | 0 |
| 359432 | 1 | 0 | 0 | 0 | 0 |
| 363364 | 1 | 0 | 0 | 0 | 0 |
| 363365 | 1 | 0 | 0 | 0 | 0 |
| 363411 | 1 | 0 | 0 | 0 | 0 |
| 366367 | 1 | 0 | 0 | 0 | 0 |
| 366368 | 1 | 0 | 0 | 0 | 0 |
| 366369 | 1 | 0 | 0 | 0 | 0 |
| 369370 | 1 | 0 | 0 | 0 | 0 |
| 369371 | 1 | 0 | 0 | 0 | 0 |
| 369372 | 1 | 0 | 0 | 0 | 0 |
| 372373 | 1 | 0 | 0 | 0 | 0 |
| 372380 | 2 | 0 | 0 | 0 | 0 |
| 373374 | 1 | 0 | 0 | 0 | 0 |
| 374375 | 1 | 0 | 0 | 0 | 0 |
| 374376 | 1 | 0 | 0 | 0 | 0 |
| 374377 | 1 | 0 | 0 | 0 | 0 |
| 377378 | 1 | 0 | 0 | 0 | 0 |
| 377379 | 1 | 0 | 0 | 0 | 0 |
| 377381 | 1 | 0 | 0 | 0 | 0 |
| 381382 | 1 | 0 | 0 | 0 | 0 |
| 382383 | 1 | 0 | 0 | 0 | 0 |
| 382390 | 2 | 0 | 0 | 0 | 0 |
| 383384 | 1 | 0 | 0 | 0 | 0 |
| 383385 | 2 | 0 | 0 | 0 | 0 |
| 385386 | 1 | 0 | 0 | 0 | 0 |
| 385387 | 1 | 0 | 0 | 0 | 0 |
| 387388 | 2 | 0 | 0 | 0 | 0 |
| 387392 | 1 | 0 | 0 | 0 | 0 |
| 388389 | 1 | 0 | 0 | 0 | 0 |
| 388390 | 1 | 0 | 0 | 0 | 0 |
| 390391 | 1 | 0 | 0 | 0 | 0 |
| 392393 | 1 | 0 | 0 | 0 | 0 |
| 392394 | 1 | 0 | 0 | 0 | 0 |
| 392398 | 1 | 0 | 0 | 0 | 0 |
| 393402 | 1 | 0 | 0 | 0 | 0 |
| 393409 | 2 | 0 | 0 | 0 | 0 |
| 394395 | 1 | 0 | 0 | 0 | 0 |
| 394396 | 1 | 0 | 0 | 0 | 0 |
| 394397 | 1 | 0 | 0 | 0 | 0 |
| 398399 | 1 | 0 | 0 | 0 | 0 |
| 398400 | 1 | 0 | 0 | 0 | 0 |
| 398401 | 1 | 0 | 0 | 0 | 0 |
| 402403 | 1 | 0 | 0 | 0 | 0 |
| 402404 | 2 | 0 | 0 | 0 | 0 |
| 404405 | 1 | 0 | 0 | 0 | 0 |
| 404406 | 1 | 0 | 0 | 0 | 0 |
| 406407 | 2 | 0 | 0 | 0 | 0 |
| 406411 | 1 | 0 | 0 | 0 | 0 |
| 407408 | 1 | 0 | 0 | 0 | 0 |
| 407409 | 1 | 0 | 0 | 0 | 0 |
| 409410 | 1 | 0 | 0 | 0 | 0 |
| 412413 | 1 | 0 | 0 | 0 | 0 |
| 412414 | 1 | 0 | 0 | 0 | 0 |
| 414415 | 1 | 0 | 0 | 0 | 0 |
| 414416 | 1 | 0 | 0 | 0 | 0 |
| 414417 | 1 | 0 | 0 | 0 | 0 |
| 417418 | 1 | 0 | 0 | 0 | 0 |
| 417419 | 1 | 0 | 0 | 0 | 0 |
| 417420 | 1 | 0 | 0 | 0 | 0 |
| 420421 | 1 | 0 | 0 | 0 | 0 |
| 420422 | 1 | 0 | 0 | 0 | 0 |
| 420423 | 1 | 0 | 0 | 0 | 0 |
| 423424 | 1 | 0 | 0 | 0 | 0 |
| 423425 | 1 | 0 | 0 | 0 | 0 |
| 423426 | 1 | 0 | 0 | 0 | 0 |
| 426427 | 1 | 0 | 0 | 0 | 0 |
| 426428 | 1 | 0 | 0 | 0 | 0 |
| 426429 | 1 | 0 | 0 | 0 | 0 |
| 429430 | 1 | 0 | 0 | 0 | 0 |
| 429431 | 1 | 0 | 0 | 0 | 0 |
| 429432 | 1 | 0 | 0 | 0 | 0 |
| 432433 | 1 | 0 | 0 | 0 | 0 |













|          |         |         |   |   |   |   |   |   |   |   |   |   |   |   |   |
|----------|---------|---------|---|---|---|---|---|---|---|---|---|---|---|---|---|
| 117.9110 | 33.4970 | 9.3350  | H | 0 | 0 | 0 | 0 | 0 | 0 | 0 | 0 | 0 | 0 | 0 | 0 |
| 118.7740 | 34.2060 | 11.0800 | N | 0 | 0 | 3 | 0 | 0 | 0 | 0 | 0 | 0 | 0 | 0 | 0 |
| 119.0540 | 35.4370 | 11.8090 | C | 0 | 0 | 0 | 0 | 0 | 0 | 0 | 0 | 0 | 0 | 0 | 0 |
| 119.3330 | 35.1900 | 12.8380 | H | 0 | 0 | 0 | 0 | 0 | 0 | 0 | 0 | 0 | 0 | 0 | 0 |
| 118.1770 | 36.0910 | 11.8490 | H | 0 | 0 | 0 | 0 | 0 | 0 | 0 | 0 | 0 | 0 | 0 | 0 |
| 119.8940 | 35.9850 | 11.3730 | H | 0 | 0 | 0 | 0 | 0 | 0 | 0 | 0 | 0 | 0 | 0 | 0 |
| 118.0580 | 33.6860 | 11.5880 | H | 0 | 0 | 0 | 0 | 0 | 0 | 0 | 0 | 0 | 0 | 0 | 0 |
| 1        | 2       | 1       | 0 | 0 | 0 | 0 | 0 | 0 | 0 | 0 | 0 | 0 | 0 | 0 | 0 |
| 1        | 3       | 1       | 0 | 0 | 0 | 0 | 0 | 0 | 0 | 0 | 0 | 0 | 0 | 0 | 0 |
| 1        | 4       | 1       | 0 | 0 | 0 | 0 | 0 | 0 | 0 | 0 | 0 | 0 | 0 | 0 | 0 |
| 1        | 5       | 1       | 0 | 0 | 0 | 0 | 0 | 0 | 0 | 0 | 0 | 0 | 0 | 0 | 0 |
| 5        | 6       | 1       | 0 | 0 | 0 | 0 | 0 | 0 | 0 | 0 | 0 | 0 | 0 | 0 | 0 |
| 5        | 7       | 1       | 0 | 0 | 0 | 0 | 0 | 0 | 0 | 0 | 0 | 0 | 0 | 0 | 0 |
| 7        | 8       | 1       | 0 | 0 | 0 | 0 | 0 | 0 | 0 | 0 | 0 | 0 | 0 | 0 | 0 |
| 7        | 9       | 1       | 0 | 0 | 0 | 0 | 0 | 0 | 0 | 0 | 0 | 0 | 0 | 0 | 0 |
| 7        | 10      | 1       | 0 | 0 | 0 | 0 | 0 | 0 | 0 | 0 | 0 | 0 | 0 | 0 | 0 |
| 10       | 11      | 1       | 0 | 0 | 0 | 0 | 0 | 0 | 0 | 0 | 0 | 0 | 0 | 0 | 0 |
| 10       | 12      | 1       | 0 | 0 | 0 | 0 | 0 | 0 | 0 | 0 | 0 | 0 | 0 | 0 | 0 |
| 10       | 13      | 1       | 0 | 0 | 0 | 0 | 0 | 0 | 0 | 0 | 0 | 0 | 0 | 0 | 0 |
| 13       | 14      | 1       | 0 | 0 | 0 | 0 | 0 | 0 | 0 | 0 | 0 | 0 | 0 | 0 | 0 |
| 13       | 33      | 1       | 0 | 0 | 0 | 0 | 0 | 0 | 0 | 0 | 0 | 0 | 0 | 0 | 0 |
| 14       | 15      | 1       | 0 | 0 | 0 | 0 | 0 | 0 | 0 | 0 | 0 | 0 | 0 | 0 | 0 |
| 14       | 16      | 1       | 0 | 0 | 0 | 0 | 0 | 0 | 0 | 0 | 0 | 0 | 0 | 0 | 0 |
| 14       | 17      | 1       | 0 | 0 | 0 | 0 | 0 | 0 | 0 | 0 | 0 | 0 | 0 | 0 | 0 |
| 18       | 19      | 1       | 0 | 0 | 0 | 0 | 0 | 0 | 0 | 0 | 0 | 0 | 0 | 0 | 0 |
| 18       | 20      | 1       | 0 | 0 | 0 | 0 | 0 | 0 | 0 | 0 | 0 | 0 | 0 | 0 | 0 |
| 18       | 21      | 1       | 0 | 0 | 0 | 0 | 0 | 0 | 0 | 0 | 0 | 0 | 0 | 0 | 0 |
| 18       | 30      | 1       | 0 | 0 | 0 | 0 | 0 | 0 | 0 | 0 | 0 | 0 | 0 | 0 | 0 |
| 21       | 22      | 1       | 0 | 0 | 0 | 0 | 0 | 0 | 0 | 0 | 0 | 0 | 0 | 0 | 0 |
| 22       | 23      | 1       | 0 | 0 | 0 | 0 | 0 | 0 | 0 | 0 | 0 | 0 | 0 | 0 | 0 |
| 22       | 29      | 2       | 0 | 0 | 0 | 0 | 0 | 0 | 0 | 0 | 0 | 0 | 0 | 0 | 0 |
| 23       | 24      | 1       | 0 | 0 | 0 | 0 | 0 | 0 | 0 | 0 | 0 | 0 | 0 | 0 | 0 |
| 23       | 25      | 1       | 0 | 0 | 0 | 0 | 0 | 0 | 0 | 0 | 0 | 0 | 0 | 0 | 0 |
| 23       | 26      | 1       | 0 | 0 | 0 | 0 | 0 | 0 | 0 | 0 | 0 | 0 | 0 | 0 | 0 |
| 26       | 27      | 1       | 0 | 0 | 0 | 0 | 0 | 0 | 0 | 0 | 0 | 0 | 0 | 0 | 0 |
| 26       | 28      | 1       | 0 | 0 | 0 | 0 | 0 | 0 | 0 | 0 | 0 | 0 | 0 | 0 | 0 |
| 26       | 83      | 1       | 0 | 0 | 0 | 0 | 0 | 0 | 0 | 0 | 0 | 0 | 0 | 0 | 0 |
| 30       | 31      | 1       | 0 | 0 | 0 | 0 | 0 | 0 | 0 | 0 | 0 | 0 | 0 | 0 | 0 |
| 30       | 32      | 1       | 0 | 0 | 0 | 0 | 0 | 0 | 0 | 0 | 0 | 0 | 0 | 0 | 0 |
| 30       | 78      | 1       | 0 | 0 | 0 | 0 | 0 | 0 | 0 | 0 | 0 | 0 | 0 | 0 | 0 |
| 33       | 34      | 1       | 0 | 0 | 0 | 0 | 0 | 0 | 0 | 0 | 0 | 0 | 0 | 0 | 0 |
| 33       | 35      | 1       | 0 | 0 | 0 | 0 | 0 | 0 | 0 | 0 | 0 | 0 | 0 | 0 | 0 |
| 33       | 36      | 1       | 0 | 0 | 0 | 0 | 0 | 0 | 0 | 0 | 0 | 0 | 0 | 0 | 0 |
| 36       | 37      | 1       | 0 | 0 | 0 | 0 | 0 | 0 | 0 | 0 | 0 | 0 | 0 | 0 | 0 |
| 36       | 38      | 1       | 0 | 0 | 0 | 0 | 0 | 0 | 0 | 0 | 0 | 0 | 0 | 0 | 0 |
| 36       | 39      | 1       | 0 | 0 | 0 | 0 | 0 | 0 | 0 | 0 | 0 | 0 | 0 | 0 | 0 |
| 39       | 40      | 1       | 0 | 0 | 0 | 0 | 0 | 0 | 0 | 0 | 0 | 0 | 0 | 0 | 0 |
| 39       | 47      | 2       | 0 | 0 | 0 | 0 | 0 | 0 | 0 | 0 | 0 | 0 | 0 | 0 | 0 |
| 40       | 41      | 1       | 0 | 0 | 0 | 0 | 0 | 0 | 0 | 0 | 0 | 0 | 0 | 0 | 0 |
| 41       | 42      | 1       | 0 | 0 | 0 | 0 | 0 | 0 | 0 | 0 | 0 | 0 | 0 | 0 | 0 |
| 41       | 43      | 1       | 0 | 0 | 0 | 0 | 0 | 0 | 0 | 0 | 0 | 0 | 0 | 0 | 0 |
| 41       | 44      | 1       | 0 | 0 | 0 | 0 | 0 | 0 | 0 | 0 | 0 | 0 | 0 | 0 | 0 |
| 44       | 45      | 1       | 0 | 0 | 0 | 0 | 0 | 0 | 0 | 0 | 0 | 0 | 0 | 0 | 0 |
| 44       | 46      | 1       | 0 | 0 | 0 | 0 | 0 | 0 | 0 | 0 | 0 | 0 | 0 | 0 | 0 |
| 44       | 48      | 1       | 0 | 0 | 0 | 0 | 0 | 0 | 0 | 0 | 0 | 0 | 0 | 0 | 0 |
| 48       | 49      | 1       | 0 | 0 | 0 | 0 | 0 | 0 | 0 | 0 | 0 | 0 | 0 | 0 | 0 |
| 49       | 50      | 1       | 0 | 0 | 0 | 0 | 0 | 0 | 0 | 0 | 0 | 0 | 0 | 0 | 0 |
| 49       | 57      | 2       | 0 | 0 | 0 | 0 | 0 | 0 | 0 | 0 | 0 | 0 | 0 | 0 | 0 |
| 50       | 51      | 1       | 0 | 0 | 0 | 0 | 0 | 0 | 0 | 0 | 0 | 0 | 0 | 0 | 0 |
| 50       | 52      | 2       | 0 | 0 | 0 | 0 | 0 | 0 | 0 | 0 | 0 | 0 | 0 | 0 | 0 |
| 52       | 53      | 1       | 0 | 0 | 0 | 0 | 0 | 0 | 0 | 0 | 0 | 0 | 0 | 0 | 0 |
| 52       | 54      | 1       | 0 | 0 | 0 | 0 | 0 | 0 | 0 | 0 | 0 | 0 | 0 | 0 | 0 |
| 54       | 55      | 2       | 0 | 0 | 0 | 0 | 0 | 0 | 0 | 0 | 0 | 0 | 0 | 0 | 0 |
| 54       | 59      | 1       | 0 | 0 | 0 | 0 | 0 | 0 | 0 | 0 | 0 | 0 | 0 | 0 | 0 |
| 55       | 56      | 1       | 0 | 0 | 0 | 0 | 0 | 0 | 0 | 0 | 0 | 0 | 0 | 0 | 0 |
| 55       | 57      | 1       | 0 | 0 | 0 | 0 | 0 | 0 | 0 | 0 | 0 | 0 | 0 | 0 | 0 |
| 57       | 58      | 1       | 0 | 0 | 0 | 0 | 0 | 0 | 0 | 0 | 0 | 0 | 0 | 0 | 0 |
| 59       | 60      | 1       | 0 | 0 | 0 | 0 | 0 | 0 | 0 | 0 | 0 | 0 | 0 | 0 | 0 |
| 59       | 61      | 1       | 0 | 0 | 0 | 0 | 0 | 0 | 0 | 0 | 0 | 0 | 0 | 0 | 0 |
| 59       | 65      | 1       | 0 | 0 | 0 | 0 | 0 | 0 | 0 | 0 | 0 | 0 | 0 | 0 | 0 |
| 60       | 69      | 1       | 0 | 0 | 0 | 0 | 0 | 0 | 0 | 0 | 0 | 0 | 0 | 0 | 0 |
| 60       | 76      | 2       | 0 | 0 | 0 | 0 | 0 | 0 | 0 | 0 | 0 | 0 | 0 | 0 | 0 |
| 61       | 62      | 1       | 0 | 0 | 0 | 0 | 0 | 0 | 0 | 0 | 0 | 0 | 0 | 0 | 0 |
| 61       | 63      | 1       | 0 | 0 | 0 | 0 | 0 | 0 | 0 | 0 | 0 | 0 | 0 | 0 | 0 |
| 61       | 64      | 1       | 0 | 0 | 0 | 0 | 0 | 0 | 0 | 0 | 0 | 0 | 0 | 0 | 0 |
| 65       | 66      | 1       | 0 | 0 | 0 | 0 | 0 | 0 | 0 | 0 | 0 | 0 | 0 | 0 | 0 |
| 65       | 67      | 1       | 0 | 0 | 0 | 0 | 0 | 0 | 0 | 0 | 0 | 0 | 0 | 0 | 0 |
| 65       | 68      | 1       | 0 | 0 | 0 | 0 | 0 | 0 | 0 | 0 | 0 | 0 | 0 | 0 | 0 |
| 69       | 70      | 1       | 0 | 0 | 0 | 0 | 0 | 0 | 0 | 0 | 0 | 0 | 0 | 0 | 0 |
| 69       | 71      | 2       | 0 | 0 | 0 | 0 | 0 | 0 | 0 | 0 | 0 | 0 | 0 | 0 | 0 |
| 71       | 72      | 1       | 0 | 0 | 0 | 0 | 0 | 0 | 0 | 0 | 0 | 0 | 0 | 0 | 0 |

|     |     |   |   |   |   |   |
|-----|-----|---|---|---|---|---|
| 71  | 73  | 1 | 0 | 0 | 0 | 0 |
| 73  | 74  | 2 | 0 | 0 | 0 | 0 |
| 73  | 78  | 1 | 0 | 0 | 0 | 0 |
| 74  | 75  | 1 | 0 | 0 | 0 | 0 |
| 74  | 76  | 1 | 0 | 0 | 0 | 0 |
| 76  | 77  | 1 | 0 | 0 | 0 | 0 |
| 79  | 80  | 1 | 0 | 0 | 0 | 0 |
| 79  | 81  | 1 | 0 | 0 | 0 | 0 |
| 79  | 82  | 1 | 0 | 0 | 0 | 0 |
| 79  | 83  | 1 | 0 | 0 | 0 | 0 |
| 83  | 84  | 1 | 0 | 0 | 0 | 0 |
| 84  | 85  | 1 | 0 | 0 | 0 | 0 |
| 84  | 86  | 1 | 0 | 0 | 0 | 0 |
| 84  | 87  | 1 | 0 | 0 | 0 | 0 |
| 87  | 88  | 1 | 0 | 0 | 0 | 0 |
| 87  | 89  | 1 | 0 | 0 | 0 | 0 |
| 87  | 90  | 1 | 0 | 0 | 0 | 0 |
| 90  | 91  | 1 | 0 | 0 | 0 | 0 |
| 90  | 110 | 1 | 0 | 0 | 0 | 0 |
| 91  | 92  | 1 | 0 | 0 | 0 | 0 |
| 91  | 93  | 1 | 0 | 0 | 0 | 0 |
| 91  | 94  | 1 | 0 | 0 | 0 | 0 |
| 95  | 96  | 1 | 0 | 0 | 0 | 0 |
| 95  | 97  | 1 | 0 | 0 | 0 | 0 |
| 95  | 98  | 1 | 0 | 0 | 0 | 0 |
| 95  | 107 | 1 | 0 | 0 | 0 | 0 |
| 98  | 99  | 1 | 0 | 0 | 0 | 0 |
| 99  | 100 | 1 | 0 | 0 | 0 | 0 |
| 99  | 106 | 2 | 0 | 0 | 0 | 0 |
| 100 | 101 | 1 | 0 | 0 | 0 | 0 |
| 100 | 102 | 1 | 0 | 0 | 0 | 0 |
| 100 | 103 | 1 | 0 | 0 | 0 | 0 |
| 103 | 104 | 1 | 0 | 0 | 0 | 0 |
| 103 | 105 | 1 | 0 | 0 | 0 | 0 |
| 103 | 160 | 1 | 0 | 0 | 0 | 0 |
| 107 | 108 | 1 | 0 | 0 | 0 | 0 |
| 107 | 109 | 1 | 0 | 0 | 0 | 0 |
| 107 | 155 | 1 | 0 | 0 | 0 | 0 |
| 110 | 111 | 1 | 0 | 0 | 0 | 0 |
| 110 | 112 | 1 | 0 | 0 | 0 | 0 |
| 110 | 113 | 1 | 0 | 0 | 0 | 0 |
| 113 | 114 | 1 | 0 | 0 | 0 | 0 |
| 113 | 115 | 1 | 0 | 0 | 0 | 0 |
| 113 | 116 | 1 | 0 | 0 | 0 | 0 |
| 116 | 117 | 1 | 0 | 0 | 0 | 0 |
| 116 | 124 | 2 | 0 | 0 | 0 | 0 |
| 117 | 118 | 1 | 0 | 0 | 0 | 0 |
| 118 | 119 | 1 | 0 | 0 | 0 | 0 |
| 118 | 120 | 1 | 0 | 0 | 0 | 0 |
| 118 | 121 | 1 | 0 | 0 | 0 | 0 |
| 121 | 122 | 1 | 0 | 0 | 0 | 0 |
| 121 | 123 | 1 | 0 | 0 | 0 | 0 |
| 121 | 125 | 1 | 0 | 0 | 0 | 0 |
| 125 | 126 | 1 | 0 | 0 | 0 | 0 |
| 126 | 127 | 1 | 0 | 0 | 0 | 0 |
| 126 | 134 | 2 | 0 | 0 | 0 | 0 |
| 127 | 128 | 1 | 0 | 0 | 0 | 0 |
| 127 | 129 | 2 | 0 | 0 | 0 | 0 |
| 129 | 130 | 1 | 0 | 0 | 0 | 0 |
| 129 | 131 | 1 | 0 | 0 | 0 | 0 |
| 131 | 132 | 2 | 0 | 0 | 0 | 0 |
| 131 | 136 | 1 | 0 | 0 | 0 | 0 |
| 132 | 133 | 1 | 0 | 0 | 0 | 0 |
| 132 | 134 | 1 | 0 | 0 | 0 | 0 |
| 134 | 135 | 1 | 0 | 0 | 0 | 0 |
| 136 | 137 | 1 | 0 | 0 | 0 | 0 |
| 136 | 138 | 1 | 0 | 0 | 0 | 0 |
| 136 | 142 | 1 | 0 | 0 | 0 | 0 |
| 137 | 146 | 1 | 0 | 0 | 0 | 0 |
| 137 | 153 | 2 | 0 | 0 | 0 | 0 |
| 138 | 139 | 1 | 0 | 0 | 0 | 0 |
| 138 | 140 | 1 | 0 | 0 | 0 | 0 |
| 138 | 141 | 1 | 0 | 0 | 0 | 0 |
| 142 | 143 | 1 | 0 | 0 | 0 | 0 |
| 142 | 144 | 1 | 0 | 0 | 0 | 0 |
| 142 | 145 | 1 | 0 | 0 | 0 | 0 |
| 146 | 147 | 1 | 0 | 0 | 0 | 0 |
| 146 | 148 | 2 | 0 | 0 | 0 | 0 |
| 148 | 149 | 1 | 0 | 0 | 0 | 0 |
| 148 | 150 | 1 | 0 | 0 | 0 | 0 |
| 150 | 151 | 2 | 0 | 0 | 0 | 0 |

|        |   |   |   |   |   |
|--------|---|---|---|---|---|
| 150155 | 1 | 0 | 0 | 0 | 0 |
| 151152 | 1 | 0 | 0 | 0 | 0 |
| 151153 | 1 | 0 | 0 | 0 | 0 |
| 153154 | 1 | 0 | 0 | 0 | 0 |
| 156157 | 1 | 0 | 0 | 0 | 0 |
| 156158 | 1 | 0 | 0 | 0 | 0 |
| 156159 | 1 | 0 | 0 | 0 | 0 |
| 156160 | 1 | 0 | 0 | 0 | 0 |
| 160161 | 1 | 0 | 0 | 0 | 0 |
| 161162 | 1 | 0 | 0 | 0 | 0 |
| 161163 | 1 | 0 | 0 | 0 | 0 |
| 161164 | 1 | 0 | 0 | 0 | 0 |
| 164165 | 1 | 0 | 0 | 0 | 0 |
| 164166 | 1 | 0 | 0 | 0 | 0 |
| 164167 | 1 | 0 | 0 | 0 | 0 |
| 167168 | 1 | 0 | 0 | 0 | 0 |
| 167187 | 1 | 0 | 0 | 0 | 0 |
| 168169 | 1 | 0 | 0 | 0 | 0 |
| 168170 | 1 | 0 | 0 | 0 | 0 |
| 168171 | 1 | 0 | 0 | 0 | 0 |
| 172173 | 1 | 0 | 0 | 0 | 0 |
| 172174 | 1 | 0 | 0 | 0 | 0 |
| 172175 | 1 | 0 | 0 | 0 | 0 |
| 172184 | 1 | 0 | 0 | 0 | 0 |
| 175176 | 1 | 0 | 0 | 0 | 0 |
| 176177 | 1 | 0 | 0 | 0 | 0 |
| 176183 | 2 | 0 | 0 | 0 | 0 |
| 177178 | 1 | 0 | 0 | 0 | 0 |
| 177179 | 1 | 0 | 0 | 0 | 0 |
| 177180 | 1 | 0 | 0 | 0 | 0 |
| 180181 | 1 | 0 | 0 | 0 | 0 |
| 180182 | 1 | 0 | 0 | 0 | 0 |
| 180237 | 1 | 0 | 0 | 0 | 0 |
| 184185 | 1 | 0 | 0 | 0 | 0 |
| 184186 | 1 | 0 | 0 | 0 | 0 |
| 184232 | 1 | 0 | 0 | 0 | 0 |
| 187188 | 1 | 0 | 0 | 0 | 0 |
| 187189 | 1 | 0 | 0 | 0 | 0 |
| 187190 | 1 | 0 | 0 | 0 | 0 |
| 190191 | 1 | 0 | 0 | 0 | 0 |
| 190192 | 1 | 0 | 0 | 0 | 0 |
| 190193 | 1 | 0 | 0 | 0 | 0 |
| 193194 | 1 | 0 | 0 | 0 | 0 |
| 193201 | 2 | 0 | 0 | 0 | 0 |
| 194195 | 1 | 0 | 0 | 0 | 0 |
| 195196 | 1 | 0 | 0 | 0 | 0 |
| 195197 | 1 | 0 | 0 | 0 | 0 |
| 195198 | 1 | 0 | 0 | 0 | 0 |
| 198199 | 1 | 0 | 0 | 0 | 0 |
| 198200 | 1 | 0 | 0 | 0 | 0 |
| 198202 | 1 | 0 | 0 | 0 | 0 |
| 202203 | 1 | 0 | 0 | 0 | 0 |
| 203204 | 1 | 0 | 0 | 0 | 0 |
| 203211 | 2 | 0 | 0 | 0 | 0 |
| 204205 | 1 | 0 | 0 | 0 | 0 |
| 204206 | 2 | 0 | 0 | 0 | 0 |
| 206207 | 1 | 0 | 0 | 0 | 0 |
| 206208 | 1 | 0 | 0 | 0 | 0 |
| 208209 | 2 | 0 | 0 | 0 | 0 |
| 208213 | 1 | 0 | 0 | 0 | 0 |
| 209210 | 1 | 0 | 0 | 0 | 0 |
| 209211 | 1 | 0 | 0 | 0 | 0 |
| 211212 | 1 | 0 | 0 | 0 | 0 |
| 213214 | 1 | 0 | 0 | 0 | 0 |
| 213215 | 1 | 0 | 0 | 0 | 0 |
| 213219 | 1 | 0 | 0 | 0 | 0 |
| 214223 | 1 | 0 | 0 | 0 | 0 |
| 214230 | 2 | 0 | 0 | 0 | 0 |
| 215216 | 1 | 0 | 0 | 0 | 0 |
| 215217 | 1 | 0 | 0 | 0 | 0 |
| 215218 | 1 | 0 | 0 | 0 | 0 |
| 219220 | 1 | 0 | 0 | 0 | 0 |
| 219221 | 1 | 0 | 0 | 0 | 0 |
| 219222 | 1 | 0 | 0 | 0 | 0 |
| 223224 | 1 | 0 | 0 | 0 | 0 |
| 223225 | 2 | 0 | 0 | 0 | 0 |
| 225226 | 1 | 0 | 0 | 0 | 0 |
| 225227 | 1 | 0 | 0 | 0 | 0 |
| 227228 | 2 | 0 | 0 | 0 | 0 |
| 227232 | 1 | 0 | 0 | 0 | 0 |
| 228229 | 1 | 0 | 0 | 0 | 0 |

|        |   |   |   |   |   |
|--------|---|---|---|---|---|
| 228230 | 1 | 0 | 0 | 0 | 0 |
| 230231 | 1 | 0 | 0 | 0 | 0 |
| 233234 | 1 | 0 | 0 | 0 | 0 |
| 233235 | 1 | 0 | 0 | 0 | 0 |
| 233236 | 1 | 0 | 0 | 0 | 0 |
| 233237 | 1 | 0 | 0 | 0 | 0 |
| 237238 | 1 | 0 | 0 | 0 | 0 |
| 238239 | 1 | 0 | 0 | 0 | 0 |
| 238240 | 1 | 0 | 0 | 0 | 0 |
| 238241 | 1 | 0 | 0 | 0 | 0 |
| 241242 | 1 | 0 | 0 | 0 | 0 |
| 241243 | 1 | 0 | 0 | 0 | 0 |
| 241244 | 1 | 0 | 0 | 0 | 0 |
| 244245 | 1 | 0 | 0 | 0 | 0 |
| 244264 | 1 | 0 | 0 | 0 | 0 |
| 245246 | 1 | 0 | 0 | 0 | 0 |
| 245247 | 1 | 0 | 0 | 0 | 0 |
| 245248 | 1 | 0 | 0 | 0 | 0 |
| 249250 | 1 | 0 | 0 | 0 | 0 |
| 249251 | 1 | 0 | 0 | 0 | 0 |
| 249252 | 1 | 0 | 0 | 0 | 0 |
| 249261 | 1 | 0 | 0 | 0 | 0 |
| 252253 | 1 | 0 | 0 | 0 | 0 |
| 253254 | 1 | 0 | 0 | 0 | 0 |
| 253260 | 2 | 0 | 0 | 0 | 0 |
| 254255 | 1 | 0 | 0 | 0 | 0 |
| 254256 | 1 | 0 | 0 | 0 | 0 |
| 254257 | 1 | 0 | 0 | 0 | 0 |
| 257258 | 1 | 0 | 0 | 0 | 0 |
| 257259 | 1 | 0 | 0 | 0 | 0 |
| 257314 | 1 | 0 | 0 | 0 | 0 |
| 261262 | 1 | 0 | 0 | 0 | 0 |
| 261263 | 1 | 0 | 0 | 0 | 0 |
| 261309 | 1 | 0 | 0 | 0 | 0 |
| 264265 | 1 | 0 | 0 | 0 | 0 |
| 264266 | 1 | 0 | 0 | 0 | 0 |
| 264267 | 1 | 0 | 0 | 0 | 0 |
| 267268 | 1 | 0 | 0 | 0 | 0 |
| 267269 | 1 | 0 | 0 | 0 | 0 |
| 267270 | 1 | 0 | 0 | 0 | 0 |
| 270271 | 1 | 0 | 0 | 0 | 0 |
| 270278 | 2 | 0 | 0 | 0 | 0 |
| 271272 | 1 | 0 | 0 | 0 | 0 |
| 272273 | 1 | 0 | 0 | 0 | 0 |
| 272274 | 1 | 0 | 0 | 0 | 0 |
| 272275 | 1 | 0 | 0 | 0 | 0 |
| 275276 | 1 | 0 | 0 | 0 | 0 |
| 275277 | 1 | 0 | 0 | 0 | 0 |
| 275279 | 1 | 0 | 0 | 0 | 0 |
| 279280 | 1 | 0 | 0 | 0 | 0 |
| 280281 | 1 | 0 | 0 | 0 | 0 |
| 280288 | 2 | 0 | 0 | 0 | 0 |
| 281282 | 1 | 0 | 0 | 0 | 0 |
| 281283 | 2 | 0 | 0 | 0 | 0 |
| 283284 | 1 | 0 | 0 | 0 | 0 |
| 283285 | 1 | 0 | 0 | 0 | 0 |
| 285286 | 2 | 0 | 0 | 0 | 0 |
| 285290 | 1 | 0 | 0 | 0 | 0 |
| 286287 | 1 | 0 | 0 | 0 | 0 |
| 286288 | 1 | 0 | 0 | 0 | 0 |
| 288289 | 1 | 0 | 0 | 0 | 0 |
| 290291 | 1 | 0 | 0 | 0 | 0 |
| 290292 | 1 | 0 | 0 | 0 | 0 |
| 290296 | 1 | 0 | 0 | 0 | 0 |
| 291300 | 1 | 0 | 0 | 0 | 0 |
| 291307 | 2 | 0 | 0 | 0 | 0 |
| 292293 | 1 | 0 | 0 | 0 | 0 |
| 292294 | 1 | 0 | 0 | 0 | 0 |
| 292295 | 1 | 0 | 0 | 0 | 0 |
| 296297 | 1 | 0 | 0 | 0 | 0 |
| 296298 | 1 | 0 | 0 | 0 | 0 |
| 296299 | 1 | 0 | 0 | 0 | 0 |
| 300301 | 1 | 0 | 0 | 0 | 0 |
| 300302 | 2 | 0 | 0 | 0 | 0 |
| 302303 | 1 | 0 | 0 | 0 | 0 |
| 302304 | 1 | 0 | 0 | 0 | 0 |
| 304305 | 2 | 0 | 0 | 0 | 0 |
| 304309 | 1 | 0 | 0 | 0 | 0 |
| 305306 | 1 | 0 | 0 | 0 | 0 |
| 305307 | 1 | 0 | 0 | 0 | 0 |
| 307308 | 1 | 0 | 0 | 0 | 0 |

|        |   |   |   |   |   |
|--------|---|---|---|---|---|
| 310311 | 1 | 0 | 0 | 0 | 0 |
| 310312 | 1 | 0 | 0 | 0 | 0 |
| 310313 | 1 | 0 | 0 | 0 | 0 |
| 310314 | 1 | 0 | 0 | 0 | 0 |
| 314315 | 1 | 0 | 0 | 0 | 0 |
| 315316 | 1 | 0 | 0 | 0 | 0 |
| 315317 | 1 | 0 | 0 | 0 | 0 |
| 315318 | 1 | 0 | 0 | 0 | 0 |
| 318319 | 1 | 0 | 0 | 0 | 0 |
| 318320 | 1 | 0 | 0 | 0 | 0 |
| 318321 | 1 | 0 | 0 | 0 | 0 |
| 321322 | 1 | 0 | 0 | 0 | 0 |
| 321341 | 1 | 0 | 0 | 0 | 0 |
| 322323 | 1 | 0 | 0 | 0 | 0 |
| 322324 | 1 | 0 | 0 | 0 | 0 |
| 322325 | 1 | 0 | 0 | 0 | 0 |
| 326327 | 1 | 0 | 0 | 0 | 0 |
| 326328 | 1 | 0 | 0 | 0 | 0 |
| 326329 | 1 | 0 | 0 | 0 | 0 |
| 326338 | 1 | 0 | 0 | 0 | 0 |
| 329330 | 1 | 0 | 0 | 0 | 0 |
| 330331 | 1 | 0 | 0 | 0 | 0 |
| 330337 | 2 | 0 | 0 | 0 | 0 |
| 331332 | 1 | 0 | 0 | 0 | 0 |
| 331333 | 1 | 0 | 0 | 0 | 0 |
| 331334 | 1 | 0 | 0 | 0 | 0 |
| 334335 | 1 | 0 | 0 | 0 | 0 |
| 334336 | 1 | 0 | 0 | 0 | 0 |
| 334391 | 1 | 0 | 0 | 0 | 0 |
| 338339 | 1 | 0 | 0 | 0 | 0 |
| 338340 | 1 | 0 | 0 | 0 | 0 |
| 338386 | 1 | 0 | 0 | 0 | 0 |
| 341342 | 1 | 0 | 0 | 0 | 0 |
| 341343 | 1 | 0 | 0 | 0 | 0 |
| 341344 | 1 | 0 | 0 | 0 | 0 |
| 344345 | 1 | 0 | 0 | 0 | 0 |
| 344346 | 1 | 0 | 0 | 0 | 0 |
| 344347 | 1 | 0 | 0 | 0 | 0 |
| 347348 | 1 | 0 | 0 | 0 | 0 |
| 347355 | 2 | 0 | 0 | 0 | 0 |
| 348349 | 1 | 0 | 0 | 0 | 0 |
| 349350 | 1 | 0 | 0 | 0 | 0 |
| 349351 | 1 | 0 | 0 | 0 | 0 |
| 349352 | 1 | 0 | 0 | 0 | 0 |
| 352353 | 1 | 0 | 0 | 0 | 0 |
| 352354 | 1 | 0 | 0 | 0 | 0 |
| 352356 | 1 | 0 | 0 | 0 | 0 |
| 356357 | 1 | 0 | 0 | 0 | 0 |
| 357358 | 1 | 0 | 0 | 0 | 0 |
| 357365 | 2 | 0 | 0 | 0 | 0 |
| 358359 | 1 | 0 | 0 | 0 | 0 |
| 358360 | 2 | 0 | 0 | 0 | 0 |
| 360361 | 1 | 0 | 0 | 0 | 0 |
| 360362 | 1 | 0 | 0 | 0 | 0 |
| 362363 | 2 | 0 | 0 | 0 | 0 |
| 362367 | 1 | 0 | 0 | 0 | 0 |
| 363364 | 1 | 0 | 0 | 0 | 0 |
| 363365 | 1 | 0 | 0 | 0 | 0 |
| 365366 | 1 | 0 | 0 | 0 | 0 |
| 367368 | 1 | 0 | 0 | 0 | 0 |
| 367369 | 1 | 0 | 0 | 0 | 0 |
| 367373 | 1 | 0 | 0 | 0 | 0 |
| 368377 | 1 | 0 | 0 | 0 | 0 |
| 368384 | 2 | 0 | 0 | 0 | 0 |
| 369370 | 1 | 0 | 0 | 0 | 0 |
| 369371 | 1 | 0 | 0 | 0 | 0 |
| 369372 | 1 | 0 | 0 | 0 | 0 |
| 373374 | 1 | 0 | 0 | 0 | 0 |
| 373375 | 1 | 0 | 0 | 0 | 0 |
| 373376 | 1 | 0 | 0 | 0 | 0 |
| 377378 | 1 | 0 | 0 | 0 | 0 |
| 377379 | 2 | 0 | 0 | 0 | 0 |
| 379380 | 1 | 0 | 0 | 0 | 0 |
| 379381 | 1 | 0 | 0 | 0 | 0 |
| 381382 | 2 | 0 | 0 | 0 | 0 |
| 381386 | 1 | 0 | 0 | 0 | 0 |
| 382383 | 1 | 0 | 0 | 0 | 0 |
| 382384 | 1 | 0 | 0 | 0 | 0 |
| 384385 | 1 | 0 | 0 | 0 | 0 |
| 387388 | 1 | 0 | 0 | 0 | 0 |
| 387389 | 1 | 0 | 0 | 0 | 0 |

387390 1 0 0 0 0  
387391 1 0 0 0 0  
391392 1 0 0 0 0  
392393 1 0 0 0 0  
392394 1 0 0 0 0  
392395 1 0 0 0 0  
395396 1 0 0 0 0  
395397 1 0 0 0 0  
395398 1 0 0 0 0  
398399 1 0 0 0 0  
398403 1 0 0 0 0  
399400 1 0 0 0 0  
399401 1 0 0 0 0  
399402 1 0 0 0 0

M END  
> <NAME>  
D60\_12

\$\$\$\$  
D61\_12  
MOE2012 3D

445454 0 0 1 0 0 0 0 0999 V2000  
60.0120 -19.8660 -46.5070 C 0 0 0 0 0 0 0 0 0 0 0 0 0 0 0 0  
60.0310 -18.8940 -47.0130 H 0 0 0 0 0 0 0 0 0 0 0 0 0 0 0 0  
60.8270 -19.8850 -45.7730 H 0 0 0 0 0 0 0 0 0 0 0 0 0 0 0 0  
58.7230 -20.0690 -45.8480 N 0 0 0 3 0 0 0 0 0 0 0 0 0 0 0 0  
58.7070 -20.9900 -45.4090 H 0 0 0 0 0 0 0 0 0 0 0 0 0 0 0 0  
58.4750 -19.0340 -44.8360 C 0 0 0 0 0 0 0 0 0 0 0 0 0 0 0 0  
59.2620 -19.0610 -44.0730 H 0 0 0 0 0 0 0 0 0 0 0 0 0 0 0 0  
58.4980 -18.0520 -45.3210 H 0 0 0 0 0 0 0 0 0 0 0 0 0 0 0 0  
57.1040 -19.2530 -44.1630 C 0 0 0 0 0 0 0 0 0 0 0 0 0 0 0 0  
56.3090 -19.2230 -44.9210 H 0 0 0 0 0 0 0 0 0 0 0 0 0 0 0 0  
57.1110 -20.2730 -43.7550 H 0 0 0 0 0 0 0 0 0 0 0 0 0 0 0 0  
56.7970 -18.3100 -43.0590 N 0 0 0 3 0 0 0 0 0 0 0 0 0 0 0 0  
55.5660 -18.7600 -42.3770 C 0 0 0 0 0 0 0 0 0 0 0 0 0 0 0 0  
54.6810 -18.5900 -43.0030 H 0 0 0 0 0 0 0 0 0 0 0 0 0 0 0 0  
55.6230 -19.8410 -42.1950 H 0 0 0 0 0 0 0 0 0 0 0 0 0 0 0 0  
60.2430 -20.9620 -47.5360 C 0 0 0 0 0 0 0 0 0 0 0 0 0 0 0 0  
60.2630 -21.9510 -47.0650 H 0 0 0 0 0 0 0 0 0 0 0 0 0 0 0 0  
59.4580 -20.9610 -48.2990 H 0 0 0 0 0 0 0 0 0 0 0 0 0 0 0 0  
61.2030 -20.8100 -48.0390 H 0 0 0 0 0 0 0 0 0 0 0 0 0 0 0 0  
55.3790 -18.1110 -41.0090 C 0 0 0 0 0 0 0 0 0 0 0 0 0 0 0 0  
55.1620 -17.0420 -41.0850 H 0 0 0 0 0 0 0 0 0 0 0 0 0 0 0 0  
56.2690 -18.2420 -40.3850 H 0 0 0 0 0 0 0 0 0 0 0 0 0 0 0 0  
54.5350 -18.5780 -40.4890 H 0 0 0 0 0 0 0 0 0 0 0 0 0 0 0 0  
58.6810 -8.3120 -29.1790 C 0 0 0 0 0 0 0 0 0 0 0 0 0 0 0 0  
59.2820 -9.2010 -29.3950 H 0 0 0 0 0 0 0 0 0 0 0 0 0 0 0 0  
57.6480 -8.6700 -29.0870 H 0 0 0 0 0 0 0 0 0 0 0 0 0 0 0 0  
59.1570 -7.7720 -27.9360 O 0 0 0 0 0 0 0 0 0 0 0 0 0 0 0 0  
58.2780 -6.9920 -27.2470 C 0 0 0 0 0 0 0 0 0 0 0 0 0 0 0 0  
58.9130 -6.4970 -25.9770 C 0 0 0 0 0 0 0 0 0 0 0 0 0 0 0 0  
58.4820 -7.0890 -25.1610 H 0 0 0 0 0 0 0 0 0 0 0 0 0 0 0 0  
59.9910 -6.6970 -25.9790 H 0 0 0 0 0 0 0 0 0 0 0 0 0 0 0 0  
58.6390 -5.0100 -25.7440 C 0 0 0 0 0 0 0 0 0 0 0 0 0 0 0 0  
57.6460 -4.7170 -26.1050 H 0 0 0 0 0 0 0 0 0 0 0 0 0 0 0 0  
58.6230 -4.8810 -24.6530 H 0 0 0 0 0 0 0 0 0 0 0 0 0 0 0 0  
57.1360 -6.7340 -27.6030 O 0 0 0 0 0 0 0 0 0 0 0 0 0 0 0 0  
58.8170 -7.2910 -30.3050 C 0 0 0 0 0 0 0 0 0 0 0 0 0 0 0 0  
58.1470 -6.4460 -30.1030 H 0 0 0 0 0 0 0 0 0 0 0 0 0 0 0 0  
59.8180 -6.8440 -30.3420 H 0 0 0 0 0 0 0 0 0 0 0 0 0 0 0 0  
56.6770 -16.9170 -43.5410 C 0 0 0 0 0 0 0 0 0 0 0 0 0 0 0 0  
56.5250 -16.8910 -44.6280 H 0 0 0 0 0 0 0 0 0 0 0 0 0 0 0 0  
55.7930 -16.4190 -43.1260 H 0 0 0 0 0 0 0 0 0 0 0 0 0 0 0 0  
57.9160 -16.0970 -43.1850 C 0 0 0 0 0 0 0 0 0 0 0 0 0 0 0 0  
58.8430 -16.6170 -43.4490 H 0 0 0 0 0 0 0 0 0 0 0 0 0 0 0 0  
57.9210 -15.1580 -43.7510 H 0 0 0 0 0 0 0 0 0 0 0 0 0 0 0 0  
57.9270 -15.7290 -41.7250 C 0 0 0 0 0 0 0 0 0 0 0 0 0 0 0 0  
59.0180 -16.2550 -41.1020 O 0 0 0 0 0 0 0 0 0 0 0 0 0 0 0 0  
59.0980 -16.0330 -39.6860 C 0 0 0 0 0 0 0 0 0 0 0 0 0 0 0 0  
58.1200 -16.1690 -39.2080 H 0 0 0 0 0 0 0 0 0 0 0 0 0 0 0 0  
59.7410 -16.8180 -39.2710 H 0 0 0 0 0 0 0 0 0 0 0 0 0 0 0 0  
59.6900 -14.6640 -39.3680 C 0 0 0 0 0 0 0 0 0 0 0 0 0 0 0 0  
60.6630 -14.5690 -39.8650 H 0 0 0 0 0 0 0 0 0 0 0 0 0 0 0 0  
59.0240 -13.8770 -39.7420 H 0 0 0 0 0 0 0 0 0 0 0 0 0 0 0 0  
57.0760 -15.0320 -41.1880 O 0 0 0 0 0 0 0 0 0 0 0 0 0 0 0 0  
59.8350 -14.5630 -37.9520 O 0 0 0 0 0 0 0 0 0 0 0 0 0 0 0 0  
60.3770 -13.4080 -37.4590 C 0 0 0 0 0 0 0 0 0 0 0 0 0 0 0 0  
60.5380 -13.3840 -36.0740 C 0 0 0 0 0 0 0 0 0 0 0 0 0 0 0 0  
60.2390 -14.2460 -35.4820 H 0 0 0 0 0 0 0 0 0 0 0 0 0 0 0 0  
61.0840 -12.2650 -35.4400 C 0 0 0 0 0 0 0 0 0 0 0 0 0 0 0 0













|    |     |   |   |   |   |   |
|----|-----|---|---|---|---|---|
| 16 | 18  | 1 | 0 | 0 | 0 | 0 |
| 16 | 19  | 1 | 0 | 0 | 0 | 0 |
| 20 | 21  | 1 | 0 | 0 | 0 | 0 |
| 20 | 22  | 1 | 0 | 0 | 0 | 0 |
| 20 | 23  | 1 | 0 | 0 | 0 | 0 |
| 24 | 25  | 1 | 0 | 0 | 0 | 0 |
| 24 | 26  | 1 | 0 | 0 | 0 | 0 |
| 24 | 27  | 1 | 0 | 0 | 0 | 0 |
| 24 | 36  | 1 | 0 | 0 | 0 | 0 |
| 27 | 28  | 1 | 0 | 0 | 0 | 0 |
| 28 | 29  | 1 | 0 | 0 | 0 | 0 |
| 28 | 35  | 2 | 0 | 0 | 0 | 0 |
| 29 | 30  | 1 | 0 | 0 | 0 | 0 |
| 29 | 31  | 1 | 0 | 0 | 0 | 0 |
| 29 | 32  | 1 | 0 | 0 | 0 | 0 |
| 32 | 33  | 1 | 0 | 0 | 0 | 0 |
| 32 | 34  | 1 | 0 | 0 | 0 | 0 |
| 32 | 88  | 1 | 0 | 0 | 0 | 0 |
| 36 | 37  | 1 | 0 | 0 | 0 | 0 |
| 36 | 38  | 1 | 0 | 0 | 0 | 0 |
| 36 | 84  | 1 | 0 | 0 | 0 | 0 |
| 39 | 40  | 1 | 0 | 0 | 0 | 0 |
| 39 | 41  | 1 | 0 | 0 | 0 | 0 |
| 39 | 42  | 1 | 0 | 0 | 0 | 0 |
| 42 | 43  | 1 | 0 | 0 | 0 | 0 |
| 42 | 44  | 1 | 0 | 0 | 0 | 0 |
| 42 | 45  | 1 | 0 | 0 | 0 | 0 |
| 45 | 46  | 1 | 0 | 0 | 0 | 0 |
| 45 | 53  | 2 | 0 | 0 | 0 | 0 |
| 46 | 47  | 1 | 0 | 0 | 0 | 0 |
| 47 | 48  | 1 | 0 | 0 | 0 | 0 |
| 47 | 49  | 1 | 0 | 0 | 0 | 0 |
| 47 | 50  | 1 | 0 | 0 | 0 | 0 |
| 50 | 51  | 1 | 0 | 0 | 0 | 0 |
| 50 | 52  | 1 | 0 | 0 | 0 | 0 |
| 50 | 54  | 1 | 0 | 0 | 0 | 0 |
| 54 | 55  | 1 | 0 | 0 | 0 | 0 |
| 55 | 56  | 1 | 0 | 0 | 0 | 0 |
| 55 | 63  | 2 | 0 | 0 | 0 | 0 |
| 56 | 57  | 1 | 0 | 0 | 0 | 0 |
| 56 | 58  | 2 | 0 | 0 | 0 | 0 |
| 58 | 59  | 1 | 0 | 0 | 0 | 0 |
| 58 | 60  | 1 | 0 | 0 | 0 | 0 |
| 60 | 61  | 2 | 0 | 0 | 0 | 0 |
| 60 | 65  | 1 | 0 | 0 | 0 | 0 |
| 61 | 62  | 1 | 0 | 0 | 0 | 0 |
| 61 | 63  | 1 | 0 | 0 | 0 | 0 |
| 63 | 64  | 1 | 0 | 0 | 0 | 0 |
| 65 | 66  | 1 | 0 | 0 | 0 | 0 |
| 65 | 67  | 1 | 0 | 0 | 0 | 0 |
| 65 | 71  | 1 | 0 | 0 | 0 | 0 |
| 66 | 75  | 1 | 0 | 0 | 0 | 0 |
| 66 | 82  | 2 | 0 | 0 | 0 | 0 |
| 67 | 68  | 1 | 0 | 0 | 0 | 0 |
| 67 | 69  | 1 | 0 | 0 | 0 | 0 |
| 67 | 70  | 1 | 0 | 0 | 0 | 0 |
| 71 | 72  | 1 | 0 | 0 | 0 | 0 |
| 71 | 73  | 1 | 0 | 0 | 0 | 0 |
| 71 | 74  | 1 | 0 | 0 | 0 | 0 |
| 75 | 76  | 1 | 0 | 0 | 0 | 0 |
| 75 | 77  | 2 | 0 | 0 | 0 | 0 |
| 77 | 78  | 1 | 0 | 0 | 0 | 0 |
| 77 | 79  | 1 | 0 | 0 | 0 | 0 |
| 79 | 80  | 2 | 0 | 0 | 0 | 0 |
| 79 | 84  | 1 | 0 | 0 | 0 | 0 |
| 80 | 81  | 1 | 0 | 0 | 0 | 0 |
| 80 | 82  | 1 | 0 | 0 | 0 | 0 |
| 82 | 83  | 1 | 0 | 0 | 0 | 0 |
| 85 | 86  | 1 | 0 | 0 | 0 | 0 |
| 85 | 87  | 1 | 0 | 0 | 0 | 0 |
| 85 | 88  | 1 | 0 | 0 | 0 | 0 |
| 85 | 99  | 1 | 0 | 0 | 0 | 0 |
| 88 | 89  | 1 | 0 | 0 | 0 | 0 |
| 89 | 90  | 1 | 0 | 0 | 0 | 0 |
| 89 | 91  | 1 | 0 | 0 | 0 | 0 |
| 89 | 92  | 1 | 0 | 0 | 0 | 0 |
| 92 | 93  | 1 | 0 | 0 | 0 | 0 |
| 92 | 94  | 1 | 0 | 0 | 0 | 0 |
| 92 | 95  | 1 | 0 | 0 | 0 | 0 |
| 95 | 96  | 1 | 0 | 0 | 0 | 0 |
| 95 | 122 | 1 | 0 | 0 | 0 | 0 |

|        |   |   |   |   |   |
|--------|---|---|---|---|---|
| 96 97  | 1 | 0 | 0 | 0 | 0 |
| 96 98  | 1 | 0 | 0 | 0 | 0 |
| 96103  | 1 | 0 | 0 | 0 | 0 |
| 99100  | 1 | 0 | 0 | 0 | 0 |
| 99101  | 1 | 0 | 0 | 0 | 0 |
| 99102  | 1 | 0 | 0 | 0 | 0 |
| 103104 | 1 | 0 | 0 | 0 | 0 |
| 103105 | 1 | 0 | 0 | 0 | 0 |
| 103106 | 1 | 0 | 0 | 0 | 0 |
| 107108 | 1 | 0 | 0 | 0 | 0 |
| 107109 | 1 | 0 | 0 | 0 | 0 |
| 107110 | 1 | 0 | 0 | 0 | 0 |
| 107119 | 1 | 0 | 0 | 0 | 0 |
| 110111 | 1 | 0 | 0 | 0 | 0 |
| 111112 | 1 | 0 | 0 | 0 | 0 |
| 111118 | 2 | 0 | 0 | 0 | 0 |
| 112113 | 1 | 0 | 0 | 0 | 0 |
| 112114 | 1 | 0 | 0 | 0 | 0 |
| 112115 | 1 | 0 | 0 | 0 | 0 |
| 115116 | 1 | 0 | 0 | 0 | 0 |
| 115117 | 1 | 0 | 0 | 0 | 0 |
| 115171 | 1 | 0 | 0 | 0 | 0 |
| 119120 | 1 | 0 | 0 | 0 | 0 |
| 119121 | 1 | 0 | 0 | 0 | 0 |
| 119167 | 1 | 0 | 0 | 0 | 0 |
| 122123 | 1 | 0 | 0 | 0 | 0 |
| 122124 | 1 | 0 | 0 | 0 | 0 |
| 122125 | 1 | 0 | 0 | 0 | 0 |
| 125126 | 1 | 0 | 0 | 0 | 0 |
| 125127 | 1 | 0 | 0 | 0 | 0 |
| 125128 | 1 | 0 | 0 | 0 | 0 |
| 128129 | 1 | 0 | 0 | 0 | 0 |
| 128136 | 2 | 0 | 0 | 0 | 0 |
| 129130 | 1 | 0 | 0 | 0 | 0 |
| 130131 | 1 | 0 | 0 | 0 | 0 |
| 130132 | 1 | 0 | 0 | 0 | 0 |
| 130133 | 1 | 0 | 0 | 0 | 0 |
| 133134 | 1 | 0 | 0 | 0 | 0 |
| 133135 | 1 | 0 | 0 | 0 | 0 |
| 133137 | 1 | 0 | 0 | 0 | 0 |
| 137138 | 1 | 0 | 0 | 0 | 0 |
| 138139 | 1 | 0 | 0 | 0 | 0 |
| 138146 | 2 | 0 | 0 | 0 | 0 |
| 139140 | 1 | 0 | 0 | 0 | 0 |
| 139141 | 2 | 0 | 0 | 0 | 0 |
| 141142 | 1 | 0 | 0 | 0 | 0 |
| 141143 | 1 | 0 | 0 | 0 | 0 |
| 143144 | 2 | 0 | 0 | 0 | 0 |
| 143148 | 1 | 0 | 0 | 0 | 0 |
| 144145 | 1 | 0 | 0 | 0 | 0 |
| 144146 | 1 | 0 | 0 | 0 | 0 |
| 146147 | 1 | 0 | 0 | 0 | 0 |
| 148149 | 1 | 0 | 0 | 0 | 0 |
| 148150 | 1 | 0 | 0 | 0 | 0 |
| 148154 | 1 | 0 | 0 | 0 | 0 |
| 149158 | 1 | 0 | 0 | 0 | 0 |
| 149165 | 2 | 0 | 0 | 0 | 0 |
| 150151 | 1 | 0 | 0 | 0 | 0 |
| 150152 | 1 | 0 | 0 | 0 | 0 |
| 150153 | 1 | 0 | 0 | 0 | 0 |
| 154155 | 1 | 0 | 0 | 0 | 0 |
| 154156 | 1 | 0 | 0 | 0 | 0 |
| 154157 | 1 | 0 | 0 | 0 | 0 |
| 158159 | 1 | 0 | 0 | 0 | 0 |
| 158160 | 2 | 0 | 0 | 0 | 0 |
| 160161 | 1 | 0 | 0 | 0 | 0 |
| 160162 | 1 | 0 | 0 | 0 | 0 |
| 162163 | 2 | 0 | 0 | 0 | 0 |
| 162167 | 1 | 0 | 0 | 0 | 0 |
| 163164 | 1 | 0 | 0 | 0 | 0 |
| 163165 | 1 | 0 | 0 | 0 | 0 |
| 165166 | 1 | 0 | 0 | 0 | 0 |
| 168169 | 1 | 0 | 0 | 0 | 0 |
| 168170 | 1 | 0 | 0 | 0 | 0 |
| 168171 | 1 | 0 | 0 | 0 | 0 |
| 168182 | 1 | 0 | 0 | 0 | 0 |
| 171172 | 1 | 0 | 0 | 0 | 0 |
| 172173 | 1 | 0 | 0 | 0 | 0 |
| 172174 | 1 | 0 | 0 | 0 | 0 |
| 172175 | 1 | 0 | 0 | 0 | 0 |
| 175176 | 1 | 0 | 0 | 0 | 0 |

|        |   |   |   |   |   |
|--------|---|---|---|---|---|
| 175177 | 1 | 0 | 0 | 0 | 0 |
| 175178 | 1 | 0 | 0 | 0 | 0 |
| 178179 | 1 | 0 | 0 | 0 | 0 |
| 178205 | 1 | 0 | 0 | 0 | 0 |
| 179180 | 1 | 0 | 0 | 0 | 0 |
| 179181 | 1 | 0 | 0 | 0 | 0 |
| 179186 | 1 | 0 | 0 | 0 | 0 |
| 182183 | 1 | 0 | 0 | 0 | 0 |
| 182184 | 1 | 0 | 0 | 0 | 0 |
| 182185 | 1 | 0 | 0 | 0 | 0 |
| 186187 | 1 | 0 | 0 | 0 | 0 |
| 186188 | 1 | 0 | 0 | 0 | 0 |
| 186189 | 1 | 0 | 0 | 0 | 0 |
| 190191 | 1 | 0 | 0 | 0 | 0 |
| 190192 | 1 | 0 | 0 | 0 | 0 |
| 190193 | 1 | 0 | 0 | 0 | 0 |
| 190202 | 1 | 0 | 0 | 0 | 0 |
| 193194 | 1 | 0 | 0 | 0 | 0 |
| 194195 | 1 | 0 | 0 | 0 | 0 |
| 194201 | 2 | 0 | 0 | 0 | 0 |
| 195196 | 1 | 0 | 0 | 0 | 0 |
| 195197 | 1 | 0 | 0 | 0 | 0 |
| 195198 | 1 | 0 | 0 | 0 | 0 |
| 198199 | 1 | 0 | 0 | 0 | 0 |
| 198200 | 1 | 0 | 0 | 0 | 0 |
| 198254 | 1 | 0 | 0 | 0 | 0 |
| 202203 | 1 | 0 | 0 | 0 | 0 |
| 202204 | 1 | 0 | 0 | 0 | 0 |
| 202250 | 1 | 0 | 0 | 0 | 0 |
| 205206 | 1 | 0 | 0 | 0 | 0 |
| 205207 | 1 | 0 | 0 | 0 | 0 |
| 205208 | 1 | 0 | 0 | 0 | 0 |
| 208209 | 1 | 0 | 0 | 0 | 0 |
| 208210 | 1 | 0 | 0 | 0 | 0 |
| 208211 | 1 | 0 | 0 | 0 | 0 |
| 211212 | 1 | 0 | 0 | 0 | 0 |
| 211219 | 2 | 0 | 0 | 0 | 0 |
| 212213 | 1 | 0 | 0 | 0 | 0 |
| 213214 | 1 | 0 | 0 | 0 | 0 |
| 213215 | 1 | 0 | 0 | 0 | 0 |
| 213216 | 1 | 0 | 0 | 0 | 0 |
| 216217 | 1 | 0 | 0 | 0 | 0 |
| 216218 | 1 | 0 | 0 | 0 | 0 |
| 216220 | 1 | 0 | 0 | 0 | 0 |
| 220221 | 1 | 0 | 0 | 0 | 0 |
| 221222 | 1 | 0 | 0 | 0 | 0 |
| 221229 | 2 | 0 | 0 | 0 | 0 |
| 222223 | 1 | 0 | 0 | 0 | 0 |
| 222224 | 2 | 0 | 0 | 0 | 0 |
| 224225 | 1 | 0 | 0 | 0 | 0 |
| 224226 | 1 | 0 | 0 | 0 | 0 |
| 226227 | 2 | 0 | 0 | 0 | 0 |
| 226231 | 1 | 0 | 0 | 0 | 0 |
| 227228 | 1 | 0 | 0 | 0 | 0 |
| 227229 | 1 | 0 | 0 | 0 | 0 |
| 229230 | 1 | 0 | 0 | 0 | 0 |
| 231232 | 1 | 0 | 0 | 0 | 0 |
| 231233 | 1 | 0 | 0 | 0 | 0 |
| 231237 | 1 | 0 | 0 | 0 | 0 |
| 232241 | 1 | 0 | 0 | 0 | 0 |
| 232248 | 2 | 0 | 0 | 0 | 0 |
| 233234 | 1 | 0 | 0 | 0 | 0 |
| 233235 | 1 | 0 | 0 | 0 | 0 |
| 233236 | 1 | 0 | 0 | 0 | 0 |
| 237238 | 1 | 0 | 0 | 0 | 0 |
| 237239 | 1 | 0 | 0 | 0 | 0 |
| 237240 | 1 | 0 | 0 | 0 | 0 |
| 241242 | 1 | 0 | 0 | 0 | 0 |
| 241243 | 2 | 0 | 0 | 0 | 0 |
| 243244 | 1 | 0 | 0 | 0 | 0 |
| 243245 | 1 | 0 | 0 | 0 | 0 |
| 245246 | 2 | 0 | 0 | 0 | 0 |
| 245250 | 1 | 0 | 0 | 0 | 0 |
| 246247 | 1 | 0 | 0 | 0 | 0 |
| 246248 | 1 | 0 | 0 | 0 | 0 |
| 248249 | 1 | 0 | 0 | 0 | 0 |
| 251252 | 1 | 0 | 0 | 0 | 0 |
| 251253 | 1 | 0 | 0 | 0 | 0 |
| 251254 | 1 | 0 | 0 | 0 | 0 |
| 251265 | 1 | 0 | 0 | 0 | 0 |
| 254255 | 1 | 0 | 0 | 0 | 0 |

|        |   |   |   |   |   |
|--------|---|---|---|---|---|
| 255256 | 1 | 0 | 0 | 0 | 0 |
| 255257 | 1 | 0 | 0 | 0 | 0 |
| 255258 | 1 | 0 | 0 | 0 | 0 |
| 258259 | 1 | 0 | 0 | 0 | 0 |
| 258260 | 1 | 0 | 0 | 0 | 0 |
| 258261 | 1 | 0 | 0 | 0 | 0 |
| 261262 | 1 | 0 | 0 | 0 | 0 |
| 261288 | 1 | 0 | 0 | 0 | 0 |
| 262263 | 1 | 0 | 0 | 0 | 0 |
| 262264 | 1 | 0 | 0 | 0 | 0 |
| 262269 | 1 | 0 | 0 | 0 | 0 |
| 265266 | 1 | 0 | 0 | 0 | 0 |
| 265267 | 1 | 0 | 0 | 0 | 0 |
| 265268 | 1 | 0 | 0 | 0 | 0 |
| 269270 | 1 | 0 | 0 | 0 | 0 |
| 269271 | 1 | 0 | 0 | 0 | 0 |
| 269272 | 1 | 0 | 0 | 0 | 0 |
| 273274 | 1 | 0 | 0 | 0 | 0 |
| 273275 | 1 | 0 | 0 | 0 | 0 |
| 273276 | 1 | 0 | 0 | 0 | 0 |
| 273285 | 1 | 0 | 0 | 0 | 0 |
| 276277 | 1 | 0 | 0 | 0 | 0 |
| 277278 | 1 | 0 | 0 | 0 | 0 |
| 277284 | 2 | 0 | 0 | 0 | 0 |
| 278279 | 1 | 0 | 0 | 0 | 0 |
| 278280 | 1 | 0 | 0 | 0 | 0 |
| 278281 | 1 | 0 | 0 | 0 | 0 |
| 281282 | 1 | 0 | 0 | 0 | 0 |
| 281283 | 1 | 0 | 0 | 0 | 0 |
| 281337 | 1 | 0 | 0 | 0 | 0 |
| 285286 | 1 | 0 | 0 | 0 | 0 |
| 285287 | 1 | 0 | 0 | 0 | 0 |
| 285333 | 1 | 0 | 0 | 0 | 0 |
| 288289 | 1 | 0 | 0 | 0 | 0 |
| 288290 | 1 | 0 | 0 | 0 | 0 |
| 288291 | 1 | 0 | 0 | 0 | 0 |
| 291292 | 1 | 0 | 0 | 0 | 0 |
| 291293 | 1 | 0 | 0 | 0 | 0 |
| 291294 | 1 | 0 | 0 | 0 | 0 |
| 294295 | 1 | 0 | 0 | 0 | 0 |
| 294302 | 2 | 0 | 0 | 0 | 0 |
| 295296 | 1 | 0 | 0 | 0 | 0 |
| 296297 | 1 | 0 | 0 | 0 | 0 |
| 296298 | 1 | 0 | 0 | 0 | 0 |
| 296299 | 1 | 0 | 0 | 0 | 0 |
| 299300 | 1 | 0 | 0 | 0 | 0 |
| 299301 | 1 | 0 | 0 | 0 | 0 |
| 299303 | 1 | 0 | 0 | 0 | 0 |
| 303304 | 1 | 0 | 0 | 0 | 0 |
| 304305 | 1 | 0 | 0 | 0 | 0 |
| 304312 | 2 | 0 | 0 | 0 | 0 |
| 305306 | 1 | 0 | 0 | 0 | 0 |
| 305307 | 2 | 0 | 0 | 0 | 0 |
| 307308 | 1 | 0 | 0 | 0 | 0 |
| 307309 | 1 | 0 | 0 | 0 | 0 |
| 309310 | 2 | 0 | 0 | 0 | 0 |
| 309314 | 1 | 0 | 0 | 0 | 0 |
| 310311 | 1 | 0 | 0 | 0 | 0 |
| 310312 | 1 | 0 | 0 | 0 | 0 |
| 312313 | 1 | 0 | 0 | 0 | 0 |
| 314315 | 1 | 0 | 0 | 0 | 0 |
| 314316 | 1 | 0 | 0 | 0 | 0 |
| 314320 | 1 | 0 | 0 | 0 | 0 |
| 315324 | 1 | 0 | 0 | 0 | 0 |
| 315331 | 2 | 0 | 0 | 0 | 0 |
| 316317 | 1 | 0 | 0 | 0 | 0 |
| 316318 | 1 | 0 | 0 | 0 | 0 |
| 316319 | 1 | 0 | 0 | 0 | 0 |
| 320321 | 1 | 0 | 0 | 0 | 0 |
| 320322 | 1 | 0 | 0 | 0 | 0 |
| 320323 | 1 | 0 | 0 | 0 | 0 |
| 324325 | 1 | 0 | 0 | 0 | 0 |
| 324326 | 2 | 0 | 0 | 0 | 0 |
| 326327 | 1 | 0 | 0 | 0 | 0 |
| 326328 | 1 | 0 | 0 | 0 | 0 |
| 328329 | 2 | 0 | 0 | 0 | 0 |
| 328333 | 1 | 0 | 0 | 0 | 0 |
| 329330 | 1 | 0 | 0 | 0 | 0 |
| 329331 | 1 | 0 | 0 | 0 | 0 |
| 331332 | 1 | 0 | 0 | 0 | 0 |
| 334335 | 1 | 0 | 0 | 0 | 0 |



|        |   |   |   |   |   |
|--------|---|---|---|---|---|
| 334336 | 1 | 0 | 0 | 0 | 0 |
| 334337 | 1 | 0 | 0 | 0 | 0 |
| 334348 | 1 | 0 | 0 | 0 | 0 |
| 337338 | 1 | 0 | 0 | 0 | 0 |
| 338339 | 1 | 0 | 0 | 0 | 0 |
| 338340 | 1 | 0 | 0 | 0 | 0 |
| 338341 | 1 | 0 | 0 | 0 | 0 |
| 341342 | 1 | 0 | 0 | 0 | 0 |
| 341343 | 1 | 0 | 0 | 0 | 0 |
| 341344 | 1 | 0 | 0 | 0 | 0 |
| 344345 | 1 | 0 | 0 | 0 | 0 |
| 344371 | 1 | 0 | 0 | 0 | 0 |
| 345346 | 1 | 0 | 0 | 0 | 0 |
| 345347 | 1 | 0 | 0 | 0 | 0 |
| 345352 | 1 | 0 | 0 | 0 | 0 |
| 348349 | 1 | 0 | 0 | 0 | 0 |
| 348350 | 1 | 0 | 0 | 0 | 0 |
| 348351 | 1 | 0 | 0 | 0 | 0 |
| 352353 | 1 | 0 | 0 | 0 | 0 |
| 352354 | 1 | 0 | 0 | 0 | 0 |
| 352355 | 1 | 0 | 0 | 0 | 0 |
| 356357 | 1 | 0 | 0 | 0 | 0 |
| 356358 | 1 | 0 | 0 | 0 | 0 |
| 356359 | 1 | 0 | 0 | 0 | 0 |
| 356368 | 1 | 0 | 0 | 0 | 0 |
| 359360 | 1 | 0 | 0 | 0 | 0 |
| 360361 | 1 | 0 | 0 | 0 | 0 |
| 360367 | 2 | 0 | 0 | 0 | 0 |
| 361362 | 1 | 0 | 0 | 0 | 0 |
| 361363 | 1 | 0 | 0 | 0 | 0 |
| 361364 | 1 | 0 | 0 | 0 | 0 |
| 364365 | 1 | 0 | 0 | 0 | 0 |
| 364366 | 1 | 0 | 0 | 0 | 0 |
| 364420 | 1 | 0 | 0 | 0 | 0 |
| 368369 | 1 | 0 | 0 | 0 | 0 |
| 368370 | 1 | 0 | 0 | 0 | 0 |
| 368416 | 1 | 0 | 0 | 0 | 0 |
| 371372 | 1 | 0 | 0 | 0 | 0 |
| 371373 | 1 | 0 | 0 | 0 | 0 |
| 371374 | 1 | 0 | 0 | 0 | 0 |
| 374375 | 1 | 0 | 0 | 0 | 0 |
| 374376 | 1 | 0 | 0 | 0 | 0 |
| 374377 | 1 | 0 | 0 | 0 | 0 |
| 377378 | 1 | 0 | 0 | 0 | 0 |
| 377385 | 2 | 0 | 0 | 0 | 0 |
| 378379 | 1 | 0 | 0 | 0 | 0 |
| 379380 | 1 | 0 | 0 | 0 | 0 |
| 379381 | 1 | 0 | 0 | 0 | 0 |
| 379382 | 1 | 0 | 0 | 0 | 0 |
| 382383 | 1 | 0 | 0 | 0 | 0 |
| 382384 | 1 | 0 | 0 | 0 | 0 |
| 382386 | 1 | 0 | 0 | 0 | 0 |
| 386387 | 1 | 0 | 0 | 0 | 0 |
| 387388 | 1 | 0 | 0 | 0 | 0 |
| 387395 | 2 | 0 | 0 | 0 | 0 |
| 388389 | 1 | 0 | 0 | 0 | 0 |
| 388390 | 2 | 0 | 0 | 0 | 0 |
| 390391 | 1 | 0 | 0 | 0 | 0 |
| 390392 | 1 | 0 | 0 | 0 | 0 |
| 392393 | 2 | 0 | 0 | 0 | 0 |
| 392397 | 1 | 0 | 0 | 0 | 0 |
| 393394 | 1 | 0 | 0 | 0 | 0 |
| 393395 | 1 | 0 | 0 | 0 | 0 |
| 395396 | 1 | 0 | 0 | 0 | 0 |
| 397398 | 1 | 0 | 0 | 0 | 0 |
| 397399 | 1 | 0 | 0 | 0 | 0 |
| 397403 | 1 | 0 | 0 | 0 | 0 |
| 398407 | 1 | 0 | 0 | 0 | 0 |
| 398414 | 2 | 0 | 0 | 0 | 0 |
| 399400 | 1 | 0 | 0 | 0 | 0 |
| 399401 | 1 | 0 | 0 | 0 | 0 |
| 399402 | 1 | 0 | 0 | 0 | 0 |
| 403404 | 1 | 0 | 0 | 0 | 0 |
| 403405 | 1 | 0 | 0 | 0 | 0 |
| 403406 | 1 | 0 | 0 | 0 | 0 |
| 407408 | 1 | 0 | 0 | 0 | 0 |
| 407409 | 2 | 0 | 0 | 0 | 0 |
| 409410 | 1 | 0 | 0 | 0 | 0 |
| 409411 | 1 | 0 | 0 | 0 | 0 |
| 411412 | 2 | 0 | 0 | 0 | 0 |
| 411416 | 1 | 0 | 0 | 0 | 0 |

```

412413 1 0 0 0 0
412414 1 0 0 0 0
414415 1 0 0 0 0
417418 1 0 0 0 0
417419 1 0 0 0 0
417420 1 0 0 0 0
417431 1 0 0 0 0
420421 1 0 0 0 0
421422 1 0 0 0 0
421423 1 0 0 0 0
421424 1 0 0 0 0
424425 1 0 0 0 0
424426 1 0 0 0 0
424427 1 0 0 0 0
427428 1 0 0 0 0
427439 1 0 0 0 0
428429 1 0 0 0 0
428430 1 0 0 0 0
428435 1 0 0 0 0
431432 1 0 0 0 0
431433 1 0 0 0 0
431434 1 0 0 0 0
435436 1 0 0 0 0
435437 1 0 0 0 0
435438 1 0 0 0 0
439440 1 0 0 0 0
439441 1 0 0 0 0
439442 1 0 0 0 0
442443 1 0 0 0 0
442444 1 0 0 0 0
442445 1 0 0 0 0

```

```

M END
> <NAME>
D61_12

```

```

$$$$
D70_12
MOE2012 3D

```

```

409424 0 0 1 0 0 0 0 0999 V2000
19.2820 28.8350 22.7950 C 0 0 0 0 0 0 0 0 0 0 0 0 0 0 0
18.6860 28.5410 21.9210 H 0 0 0 0 0 0 0 0 0 0 0 0 0 0 0
18.5560 29.2300 23.5170 H 0 0 0 0 0 0 0 0 0 0 0 0 0 0 0
19.9400 27.6160 23.4280 C 0 0 0 0 0 0 0 0 0 0 0 0 0 0 0
20.0960 27.8100 24.4980 H 0 0 0 0 0 0 0 0 0 0 0 0 0 0 0
19.2280 26.7830 23.3720 H 0 0 0 0 0 0 0 0 0 0 0 0 0 0 0
21.2770 27.1680 22.8370 C 0 0 0 0 0 0 0 0 0 0 0 0 0 0 0
22.1010 27.7420 23.2830 H 0 0 0 0 0 0 0 0 0 0 0 0 0 0 0
21.4260 26.1400 23.1950 H 0 0 0 0 0 0 0 0 0 0 0 0 0 0 0
20.2250 29.9030 22.4660 N 0 0 3 0 0 0 0 0 0 0 0 0 0 0 0
19.7120 30.7850 22.4650 H 0 0 0 0 0 0 0 0 0 0 0 0 0 0 0
21.3220 27.2180 21.3630 N 0 0 3 0 0 0 0 0 0 0 0 0 0 0 0
20.7700 29.7120 21.1160 C 0 0 0 0 0 0 0 0 0 0 0 0 0 0 0
19.9530 29.6020 20.3910 H 0 0 0 0 0 0 0 0 0 0 0 0 0 0 0
21.2850 30.6410 20.8410 H 0 0 0 0 0 0 0 0 0 0 0 0 0 0 0
21.7810 28.5630 20.9360 C 0 0 0 0 0 0 0 0 0 0 0 0 0 0 0
22.7210 28.8250 21.4420 H 0 0 0 0 0 0 0 0 0 0 0 0 0 0 0
22.0150 28.5550 19.8660 H 0 0 0 0 0 0 0 0 0 0 0 0 0 0 0
34.1630 16.6770 14.5970 C 0 0 0 0 0 0 0 0 0 0 0 0 0 0 0
33.2790 16.8000 13.9630 H 0 0 0 0 0 0 0 0 0 0 0 0 0 0 0
33.8110 16.1660 15.5010 H 0 0 0 0 0 0 0 0 0 0 0 0 0 0 0
35.0980 15.8650 13.8690 O 0 0 0 0 0 0 0 0 0 0 0 0 0 0 0
36.0100 15.1950 14.6260 C 0 0 0 0 0 0 0 0 0 0 0 0 0 0 0
36.9530 14.4130 13.7520 C 0 0 0 0 0 0 0 0 0 0 0 0 0 0 0
36.7290 13.3510 13.8940 H 0 0 0 0 0 0 0 0 0 0 0 0 0 0 0
36.7730 14.6570 12.6990 H 0 0 0 0 0 0 0 0 0 0 0 0 0 0 0
38.3910 14.7650 14.1330 C 0 0 0 0 0 0 0 0 0 0 0 0 0 0 0
38.4950 15.8550 14.0440 H 0 0 0 0 0 0 0 0 0 0 0 0 0 0 0
38.5610 14.5360 15.1890 H 0 0 0 0 0 0 0 0 0 0 0 0 0 0 0
36.0760 15.2260 15.8480 O 0 0 0 0 0 0 0 0 0 0 0 0 0 0 0
34.7730 18.0370 14.9270 C 0 0 0 0 0 0 0 0 0 0 0 0 0 0 0
35.6600 17.8890 15.5540 H 0 0 0 0 0 0 0 0 0 0 0 0 0 0 0
35.1500 18.5500 14.0350 H 0 0 0 0 0 0 0 0 0 0 0 0 0 0 0
22.2390 26.1730 20.8590 C 0 0 0 0 0 0 0 0 0 0 0 0 0 0 0
23.2830 26.4160 21.0970 H 0 0 0 0 0 0 0 0 0 0 0 0 0 0 0
22.0170 25.2240 21.3650 H 0 0 0 0 0 0 0 0 0 0 0 0 0 0 0
22.0670 25.9200 19.3590 C 0 0 0 0 0 0 0 0 0 0 0 0 0 0 0
21.0170 25.6920 19.1420 H 0 0 0 0 0 0 0 0 0 0 0 0 0 0 0
22.3770 26.7850 18.7650 H 0 0 0 0 0 0 0 0 0 0 0 0 0 0 0
22.9050 24.7500 18.9160 C 0 0 0 0 0 0 0 0 0 0 0 0 0 0 0
22.5960 24.4360 17.6250 O 0 0 0 0 0 0 0 0 0 0 0 0 0 0 0

```









|          |         |         |   |   |   |   |   |   |   |   |   |   |   |   |   |   |   |   |   |
|----------|---------|---------|---|---|---|---|---|---|---|---|---|---|---|---|---|---|---|---|---|
| 108.5290 | 22.5230 | -8.7700 | H | 0 | 0 | 0 | 0 | 0 | 0 | 0 | 0 | 0 | 0 | 0 | 0 | 0 | 0 | 0 | 0 |
| 108.4840 | 20.8730 | -7.3580 | C | 0 | 0 | 0 | 0 | 0 | 0 | 0 | 0 | 0 | 0 | 0 | 0 | 0 | 0 | 0 | 0 |
| 108.1980 | 19.5040 | -7.2430 | C | 0 | 0 | 0 | 0 | 0 | 0 | 0 | 0 | 0 | 0 | 0 | 0 | 0 | 0 | 0 | 0 |
| 108.2990 | 18.9800 | -6.2960 | H | 0 | 0 | 0 | 0 | 0 | 0 | 0 | 0 | 0 | 0 | 0 | 0 | 0 | 0 | 0 | 0 |
| 107.7630 | 18.7550 | -8.3450 | C | 0 | 0 | 0 | 0 | 0 | 0 | 0 | 0 | 0 | 0 | 0 | 0 | 0 | 0 | 0 | 0 |
| 107.5590 | 17.7000 | -8.1890 | H | 0 | 0 | 0 | 0 | 0 | 0 | 0 | 0 | 0 | 0 | 0 | 0 | 0 | 0 | 0 | 0 |
| 108.9510 | 21.7370 | -6.1630 | C | 0 | 0 | 0 | 0 | 0 | 0 | 0 | 0 | 0 | 0 | 0 | 0 | 0 | 0 | 0 | 0 |
| 110.2890 | 22.4490 | -6.4760 | C | 0 | 0 | 0 | 0 | 0 | 0 | 0 | 0 | 0 | 0 | 0 | 0 | 0 | 0 | 0 | 0 |
| 107.7850 | 22.7130 | -5.8470 | C | 0 | 0 | 0 | 0 | 0 | 0 | 0 | 0 | 0 | 0 | 0 | 0 | 0 | 0 | 0 | 0 |
| 107.5970 | 23.4170 | -6.6660 | H | 0 | 0 | 0 | 0 | 0 | 0 | 0 | 0 | 0 | 0 | 0 | 0 | 0 | 0 | 0 | 0 |
| 107.9840 | 23.3040 | -4.9440 | H | 0 | 0 | 0 | 0 | 0 | 0 | 0 | 0 | 0 | 0 | 0 | 0 | 0 | 0 | 0 | 0 |
| 106.8500 | 22.1660 | -5.6710 | H | 0 | 0 | 0 | 0 | 0 | 0 | 0 | 0 | 0 | 0 | 0 | 0 | 0 | 0 | 0 | 0 |
| 109.1870 | 20.9260 | -4.8610 | C | 0 | 0 | 0 | 0 | 0 | 0 | 0 | 0 | 0 | 0 | 0 | 0 | 0 | 0 | 0 | 0 |
| 108.2650 | 20.4470 | -4.5100 | H | 0 | 0 | 0 | 0 | 0 | 0 | 0 | 0 | 0 | 0 | 0 | 0 | 0 | 0 | 0 | 0 |
| 109.9390 | 20.1390 | -4.9910 | H | 0 | 0 | 0 | 0 | 0 | 0 | 0 | 0 | 0 | 0 | 0 | 0 | 0 | 0 | 0 | 0 |
| 109.5400 | 21.5750 | -4.0490 | H | 0 | 0 | 0 | 0 | 0 | 0 | 0 | 0 | 0 | 0 | 0 | 0 | 0 | 0 | 0 | 0 |
| 111.3930 | 21.6970 | -6.9190 | C | 0 | 0 | 0 | 0 | 0 | 0 | 0 | 0 | 0 | 0 | 0 | 0 | 0 | 0 | 0 | 0 |
| 111.3050 | 20.6220 | -7.0640 | H | 0 | 0 | 0 | 0 | 0 | 0 | 0 | 0 | 0 | 0 | 0 | 0 | 0 | 0 | 0 | 0 |
| 112.6250 | 22.3040 | -7.1810 | C | 0 | 0 | 0 | 0 | 0 | 0 | 0 | 0 | 0 | 0 | 0 | 0 | 0 | 0 | 0 | 0 |
| 113.4590 | 21.6950 | -7.5220 | H | 0 | 0 | 0 | 0 | 0 | 0 | 0 | 0 | 0 | 0 | 0 | 0 | 0 | 0 | 0 | 0 |
| 112.7980 | 23.6750 | -7.0000 | C | 0 | 0 | 0 | 0 | 0 | 0 | 0 | 0 | 0 | 0 | 0 | 0 | 0 | 0 | 0 | 0 |
| 111.7140 | 24.4380 | -6.5750 | C | 0 | 0 | 0 | 0 | 0 | 0 | 0 | 0 | 0 | 0 | 0 | 0 | 0 | 0 | 0 | 0 |
| 111.7860 | 25.5120 | -6.4390 | H | 0 | 0 | 0 | 0 | 0 | 0 | 0 | 0 | 0 | 0 | 0 | 0 | 0 | 0 | 0 | 0 |
| 110.4760 | 23.8320 | -6.3130 | C | 0 | 0 | 0 | 0 | 0 | 0 | 0 | 0 | 0 | 0 | 0 | 0 | 0 | 0 | 0 | 0 |
| 109.6680 | 24.4750 | -5.9740 | H | 0 | 0 | 0 | 0 | 0 | 0 | 0 | 0 | 0 | 0 | 0 | 0 | 0 | 0 | 0 | 0 |
| 114.0530 | 24.1350 | -7.2860 | O | 0 | 0 | 0 | 0 | 0 | 0 | 0 | 0 | 0 | 0 | 0 | 0 | 0 | 0 | 0 | 0 |
| 118.2210 | 31.7130 | -6.7290 | C | 0 | 0 | 0 | 0 | 0 | 0 | 0 | 0 | 0 | 0 | 0 | 0 | 0 | 0 | 0 | 0 |
| 118.5330 | 32.6090 | -6.1740 | H | 0 | 0 | 0 | 0 | 0 | 0 | 0 | 0 | 0 | 0 | 0 | 0 | 0 | 0 | 0 | 0 |
| 117.2850 | 32.0270 | -7.2110 | H | 0 | 0 | 0 | 0 | 0 | 0 | 0 | 0 | 0 | 0 | 0 | 0 | 0 | 0 | 0 | 0 |
| 119.2460 | 31.4450 | -7.8350 | C | 0 | 0 | 0 | 0 | 0 | 0 | 0 | 0 | 0 | 0 | 0 | 0 | 0 | 0 | 0 | 0 |
| 118.7650 | 30.8850 | -8.6470 | H | 0 | 0 | 0 | 0 | 0 | 0 | 0 | 0 | 0 | 0 | 0 | 0 | 0 | 0 | 0 | 0 |
| 119.5190 | 32.4170 | -8.2660 | H | 0 | 0 | 0 | 0 | 0 | 0 | 0 | 0 | 0 | 0 | 0 | 0 | 0 | 0 | 0 | 0 |
| 120.5310 | 30.7100 | -7.4510 | C | 0 | 0 | 0 | 0 | 0 | 0 | 0 | 0 | 0 | 0 | 0 | 0 | 0 | 0 | 0 | 0 |
| 120.4280 | 29.6350 | -7.6400 | H | 0 | 0 | 0 | 0 | 0 | 0 | 0 | 0 | 0 | 0 | 0 | 0 | 0 | 0 | 0 | 0 |
| 121.3150 | 31.0330 | -8.1470 | H | 0 | 0 | 0 | 0 | 0 | 0 | 0 | 0 | 0 | 0 | 0 | 0 | 0 | 0 | 0 | 0 |
| 117.9140 | 30.6450 | -5.7780 | N | 0 | 0 | 3 | 0 | 0 | 0 | 0 | 0 | 0 | 0 | 0 | 0 | 0 | 0 | 0 | 0 |
| 121.0200 | 30.9490 | -6.1000 | N | 0 | 0 | 3 | 0 | 0 | 0 | 0 | 0 | 0 | 0 | 0 | 0 | 0 | 0 | 0 | 0 |
| 120.9270 | 31.9330 | -5.8510 | H | 0 | 0 | 0 | 0 | 0 | 0 | 0 | 0 | 0 | 0 | 0 | 0 | 0 | 0 | 0 | 0 |
| 118.9250 | 30.5440 | -4.7160 | C | 0 | 0 | 0 | 0 | 0 | 0 | 0 | 0 | 0 | 0 | 0 | 0 | 0 | 0 | 0 | 0 |
| 118.9910 | 31.5140 | -4.2040 | H | 0 | 0 | 0 | 0 | 0 | 0 | 0 | 0 | 0 | 0 | 0 | 0 | 0 | 0 | 0 | 0 |
| 118.5570 | 29.8550 | -3.9450 | H | 0 | 0 | 0 | 0 | 0 | 0 | 0 | 0 | 0 | 0 | 0 | 0 | 0 | 0 | 0 | 0 |
| 120.3460 | 30.1030 | -5.1120 | C | 0 | 0 | 0 | 0 | 0 | 0 | 0 | 0 | 0 | 0 | 0 | 0 | 0 | 0 | 0 | 0 |
| 120.3470 | 29.0550 | -5.4350 | H | 0 | 0 | 0 | 0 | 0 | 0 | 0 | 0 | 0 | 0 | 0 | 0 | 0 | 0 | 0 | 0 |
| 120.9590 | 30.1240 | -4.2030 | H | 0 | 0 | 0 | 0 | 0 | 0 | 0 | 0 | 0 | 0 | 0 | 0 | 0 | 0 | 0 | 0 |
| 1        | 2       | 1       | 0 | 0 | 0 | 0 |   |   |   |   |   |   |   |   |   |   |   |   |   |
| 1        | 3       | 1       | 0 | 0 | 0 | 0 |   |   |   |   |   |   |   |   |   |   |   |   |   |
| 1        | 4       | 1       | 0 | 0 | 0 | 0 |   |   |   |   |   |   |   |   |   |   |   |   |   |
| 1        | 10      | 1       | 0 | 0 | 0 | 0 |   |   |   |   |   |   |   |   |   |   |   |   |   |
| 4        | 5       | 1       | 0 | 0 | 0 | 0 |   |   |   |   |   |   |   |   |   |   |   |   |   |
| 4        | 6       | 1       | 0 | 0 | 0 | 0 |   |   |   |   |   |   |   |   |   |   |   |   |   |
| 4        | 7       | 1       | 0 | 0 | 0 | 0 |   |   |   |   |   |   |   |   |   |   |   |   |   |
| 7        | 8       | 1       | 0 | 0 | 0 | 0 |   |   |   |   |   |   |   |   |   |   |   |   |   |
| 7        | 9       | 1       | 0 | 0 | 0 | 0 |   |   |   |   |   |   |   |   |   |   |   |   |   |
| 7        | 12      | 1       | 0 | 0 | 0 | 0 |   |   |   |   |   |   |   |   |   |   |   |   |   |
| 10       | 11      | 1       | 0 | 0 | 0 | 0 |   |   |   |   |   |   |   |   |   |   |   |   |   |
| 10       | 13      | 1       | 0 | 0 | 0 | 0 |   |   |   |   |   |   |   |   |   |   |   |   |   |
| 12       | 16      | 1       | 0 | 0 | 0 | 0 |   |   |   |   |   |   |   |   |   |   |   |   |   |
| 12       | 34      | 1       | 0 | 0 | 0 | 0 |   |   |   |   |   |   |   |   |   |   |   |   |   |
| 13       | 14      | 1       | 0 | 0 | 0 | 0 |   |   |   |   |   |   |   |   |   |   |   |   |   |
| 13       | 15      | 1       | 0 | 0 | 0 | 0 |   |   |   |   |   |   |   |   |   |   |   |   |   |
| 13       | 16      | 1       | 0 | 0 | 0 | 0 |   |   |   |   |   |   |   |   |   |   |   |   |   |
| 16       | 17      | 1       | 0 | 0 | 0 | 0 |   |   |   |   |   |   |   |   |   |   |   |   |   |
| 16       | 18      | 1       | 0 | 0 | 0 | 0 |   |   |   |   |   |   |   |   |   |   |   |   |   |
| 19       | 20      | 1       | 0 | 0 | 0 | 0 |   |   |   |   |   |   |   |   |   |   |   |   |   |
| 19       | 21      | 1       | 0 | 0 | 0 | 0 |   |   |   |   |   |   |   |   |   |   |   |   |   |
| 19       | 22      | 1       | 0 | 0 | 0 | 0 |   |   |   |   |   |   |   |   |   |   |   |   |   |
| 19       | 31      | 1       | 0 | 0 | 0 | 0 |   |   |   |   |   |   |   |   |   |   |   |   |   |
| 22       | 23      | 1       | 0 | 0 | 0 | 0 |   |   |   |   |   |   |   |   |   |   |   |   |   |
| 23       | 24      | 1       | 0 | 0 | 0 | 0 |   |   |   |   |   |   |   |   |   |   |   |   |   |
| 23       | 30      | 2       | 0 | 0 | 0 | 0 |   |   |   |   |   |   |   |   |   |   |   |   |   |
| 24       | 25      | 1       | 0 | 0 | 0 | 0 |   |   |   |   |   |   |   |   |   |   |   |   |   |
| 24       | 26      | 1       | 0 | 0 | 0 | 0 |   |   |   |   |   |   |   |   |   |   |   |   |   |
| 24       | 27      | 1       | 0 | 0 | 0 | 0 |   |   |   |   |   |   |   |   |   |   |   |   |   |
| 27       | 28      | 1       | 0 | 0 | 0 | 0 |   |   |   |   |   |   |   |   |   |   |   |   |   |
| 27       | 29      | 1       | 0 | 0 | 0 | 0 |   |   |   |   |   |   |   |   |   |   |   |   |   |
| 27       | 89      | 1       | 0 | 0 | 0 | 0 |   |   |   |   |   |   |   |   |   |   |   |   |   |
| 31       | 32      | 1       | 0 | 0 | 0 | 0 |   |   |   |   |   |   |   |   |   |   |   |   |   |
| 31       | 33      | 1       | 0 | 0 | 0 | 0 |   |   |   |   |   |   |   |   |   |   |   |   |   |
| 31       | 79      | 1       | 0 | 0 | 0 | 0 |   |   |   |   |   |   |   |   |   |   |   |   |   |
| 34       | 35      | 1       | 0 | 0 | 0 | 0 |   |   |   |   |   |   |   |   |   |   |   |   |   |
| 34       | 36      | 1       | 0 | 0 | 0 | 0 |   |   |   |   |   |   |   |   |   |   |   |   |   |

|     |     |   |   |   |   |   |
|-----|-----|---|---|---|---|---|
| 34  | 37  | 1 | 0 | 0 | 0 | 0 |
| 37  | 38  | 1 | 0 | 0 | 0 | 0 |
| 37  | 39  | 1 | 0 | 0 | 0 | 0 |
| 37  | 40  | 1 | 0 | 0 | 0 | 0 |
| 40  | 41  | 1 | 0 | 0 | 0 | 0 |
| 40  | 48  | 2 | 0 | 0 | 0 | 0 |
| 41  | 42  | 1 | 0 | 0 | 0 | 0 |
| 42  | 43  | 1 | 0 | 0 | 0 | 0 |
| 42  | 44  | 1 | 0 | 0 | 0 | 0 |
| 42  | 45  | 1 | 0 | 0 | 0 | 0 |
| 45  | 46  | 1 | 0 | 0 | 0 | 0 |
| 45  | 47  | 1 | 0 | 0 | 0 | 0 |
| 45  | 49  | 1 | 0 | 0 | 0 | 0 |
| 49  | 50  | 1 | 0 | 0 | 0 | 0 |
| 50  | 51  | 1 | 0 | 0 | 0 | 0 |
| 50  | 58  | 2 | 0 | 0 | 0 | 0 |
| 51  | 52  | 1 | 0 | 0 | 0 | 0 |
| 51  | 53  | 2 | 0 | 0 | 0 | 0 |
| 53  | 54  | 1 | 0 | 0 | 0 | 0 |
| 53  | 55  | 1 | 0 | 0 | 0 | 0 |
| 55  | 56  | 2 | 0 | 0 | 0 | 0 |
| 55  | 60  | 1 | 0 | 0 | 0 | 0 |
| 56  | 57  | 1 | 0 | 0 | 0 | 0 |
| 56  | 58  | 1 | 0 | 0 | 0 | 0 |
| 58  | 59  | 1 | 0 | 0 | 0 | 0 |
| 60  | 61  | 1 | 0 | 0 | 0 | 0 |
| 60  | 62  | 1 | 0 | 0 | 0 | 0 |
| 60  | 66  | 1 | 0 | 0 | 0 | 0 |
| 61  | 70  | 1 | 0 | 0 | 0 | 0 |
| 61  | 77  | 2 | 0 | 0 | 0 | 0 |
| 62  | 63  | 1 | 0 | 0 | 0 | 0 |
| 62  | 64  | 1 | 0 | 0 | 0 | 0 |
| 62  | 65  | 1 | 0 | 0 | 0 | 0 |
| 66  | 67  | 1 | 0 | 0 | 0 | 0 |
| 66  | 68  | 1 | 0 | 0 | 0 | 0 |
| 66  | 69  | 1 | 0 | 0 | 0 | 0 |
| 70  | 71  | 1 | 0 | 0 | 0 | 0 |
| 70  | 72  | 2 | 0 | 0 | 0 | 0 |
| 72  | 73  | 1 | 0 | 0 | 0 | 0 |
| 72  | 74  | 1 | 0 | 0 | 0 | 0 |
| 74  | 75  | 2 | 0 | 0 | 0 | 0 |
| 74  | 79  | 1 | 0 | 0 | 0 | 0 |
| 75  | 76  | 1 | 0 | 0 | 0 | 0 |
| 75  | 77  | 1 | 0 | 0 | 0 | 0 |
| 77  | 78  | 1 | 0 | 0 | 0 | 0 |
| 80  | 81  | 1 | 0 | 0 | 0 | 0 |
| 80  | 82  | 1 | 0 | 0 | 0 | 0 |
| 80  | 83  | 1 | 0 | 0 | 0 | 0 |
| 80  | 89  | 1 | 0 | 0 | 0 | 0 |
| 83  | 84  | 1 | 0 | 0 | 0 | 0 |
| 83  | 85  | 1 | 0 | 0 | 0 | 0 |
| 83  | 86  | 1 | 0 | 0 | 0 | 0 |
| 86  | 87  | 1 | 0 | 0 | 0 | 0 |
| 86  | 88  | 1 | 0 | 0 | 0 | 0 |
| 86  | 90  | 1 | 0 | 0 | 0 | 0 |
| 89  | 91  | 1 | 0 | 0 | 0 | 0 |
| 90  | 94  | 1 | 0 | 0 | 0 | 0 |
| 90  | 112 | 1 | 0 | 0 | 0 | 0 |
| 91  | 92  | 1 | 0 | 0 | 0 | 0 |
| 91  | 93  | 1 | 0 | 0 | 0 | 0 |
| 91  | 94  | 1 | 0 | 0 | 0 | 0 |
| 94  | 95  | 1 | 0 | 0 | 0 | 0 |
| 94  | 96  | 1 | 0 | 0 | 0 | 0 |
| 97  | 98  | 1 | 0 | 0 | 0 | 0 |
| 97  | 99  | 1 | 0 | 0 | 0 | 0 |
| 97  | 100 | 1 | 0 | 0 | 0 | 0 |
| 97  | 109 | 1 | 0 | 0 | 0 | 0 |
| 100 | 101 | 1 | 0 | 0 | 0 | 0 |
| 101 | 102 | 1 | 0 | 0 | 0 | 0 |
| 101 | 108 | 2 | 0 | 0 | 0 | 0 |
| 102 | 103 | 1 | 0 | 0 | 0 | 0 |
| 102 | 104 | 1 | 0 | 0 | 0 | 0 |
| 102 | 105 | 1 | 0 | 0 | 0 | 0 |
| 105 | 106 | 1 | 0 | 0 | 0 | 0 |
| 105 | 107 | 1 | 0 | 0 | 0 | 0 |
| 105 | 167 | 1 | 0 | 0 | 0 | 0 |
| 109 | 110 | 1 | 0 | 0 | 0 | 0 |
| 109 | 111 | 1 | 0 | 0 | 0 | 0 |
| 109 | 157 | 1 | 0 | 0 | 0 | 0 |
| 112 | 113 | 1 | 0 | 0 | 0 | 0 |
| 112 | 114 | 1 | 0 | 0 | 0 | 0 |



|        |   |   |   |   |   |
|--------|---|---|---|---|---|
| 112115 | 1 | 0 | 0 | 0 | 0 |
| 115116 | 1 | 0 | 0 | 0 | 0 |
| 115117 | 1 | 0 | 0 | 0 | 0 |
| 115118 | 1 | 0 | 0 | 0 | 0 |
| 118119 | 1 | 0 | 0 | 0 | 0 |
| 118126 | 2 | 0 | 0 | 0 | 0 |
| 119120 | 1 | 0 | 0 | 0 | 0 |
| 120121 | 1 | 0 | 0 | 0 | 0 |
| 120122 | 1 | 0 | 0 | 0 | 0 |
| 120123 | 1 | 0 | 0 | 0 | 0 |
| 123124 | 1 | 0 | 0 | 0 | 0 |
| 123125 | 1 | 0 | 0 | 0 | 0 |
| 123127 | 1 | 0 | 0 | 0 | 0 |
| 127128 | 1 | 0 | 0 | 0 | 0 |
| 128129 | 1 | 0 | 0 | 0 | 0 |
| 128136 | 2 | 0 | 0 | 0 | 0 |
| 129130 | 1 | 0 | 0 | 0 | 0 |
| 129131 | 2 | 0 | 0 | 0 | 0 |
| 131132 | 1 | 0 | 0 | 0 | 0 |
| 131133 | 1 | 0 | 0 | 0 | 0 |
| 133134 | 2 | 0 | 0 | 0 | 0 |
| 133138 | 1 | 0 | 0 | 0 | 0 |
| 134135 | 1 | 0 | 0 | 0 | 0 |
| 134136 | 1 | 0 | 0 | 0 | 0 |
| 136137 | 1 | 0 | 0 | 0 | 0 |
| 138139 | 1 | 0 | 0 | 0 | 0 |
| 138140 | 1 | 0 | 0 | 0 | 0 |
| 138144 | 1 | 0 | 0 | 0 | 0 |
| 139148 | 1 | 0 | 0 | 0 | 0 |
| 139155 | 2 | 0 | 0 | 0 | 0 |
| 140141 | 1 | 0 | 0 | 0 | 0 |
| 140142 | 1 | 0 | 0 | 0 | 0 |
| 140143 | 1 | 0 | 0 | 0 | 0 |
| 144145 | 1 | 0 | 0 | 0 | 0 |
| 144146 | 1 | 0 | 0 | 0 | 0 |
| 144147 | 1 | 0 | 0 | 0 | 0 |
| 148149 | 1 | 0 | 0 | 0 | 0 |
| 148150 | 2 | 0 | 0 | 0 | 0 |
| 150151 | 1 | 0 | 0 | 0 | 0 |
| 150152 | 1 | 0 | 0 | 0 | 0 |
| 152153 | 2 | 0 | 0 | 0 | 0 |
| 152157 | 1 | 0 | 0 | 0 | 0 |
| 153154 | 1 | 0 | 0 | 0 | 0 |
| 153155 | 1 | 0 | 0 | 0 | 0 |
| 155156 | 1 | 0 | 0 | 0 | 0 |
| 158159 | 1 | 0 | 0 | 0 | 0 |
| 158160 | 1 | 0 | 0 | 0 | 0 |
| 158161 | 1 | 0 | 0 | 0 | 0 |
| 158167 | 1 | 0 | 0 | 0 | 0 |
| 161162 | 1 | 0 | 0 | 0 | 0 |
| 161163 | 1 | 0 | 0 | 0 | 0 |
| 161164 | 1 | 0 | 0 | 0 | 0 |
| 164165 | 1 | 0 | 0 | 0 | 0 |
| 164166 | 1 | 0 | 0 | 0 | 0 |
| 164168 | 1 | 0 | 0 | 0 | 0 |
| 167169 | 1 | 0 | 0 | 0 | 0 |
| 168172 | 1 | 0 | 0 | 0 | 0 |
| 168190 | 1 | 0 | 0 | 0 | 0 |
| 169170 | 1 | 0 | 0 | 0 | 0 |
| 169171 | 1 | 0 | 0 | 0 | 0 |
| 169172 | 1 | 0 | 0 | 0 | 0 |
| 172173 | 1 | 0 | 0 | 0 | 0 |
| 172174 | 1 | 0 | 0 | 0 | 0 |
| 175176 | 1 | 0 | 0 | 0 | 0 |
| 175177 | 1 | 0 | 0 | 0 | 0 |
| 175178 | 1 | 0 | 0 | 0 | 0 |
| 175187 | 1 | 0 | 0 | 0 | 0 |
| 178179 | 1 | 0 | 0 | 0 | 0 |
| 179180 | 1 | 0 | 0 | 0 | 0 |
| 179186 | 2 | 0 | 0 | 0 | 0 |
| 180181 | 1 | 0 | 0 | 0 | 0 |
| 180182 | 1 | 0 | 0 | 0 | 0 |
| 180183 | 1 | 0 | 0 | 0 | 0 |
| 183184 | 1 | 0 | 0 | 0 | 0 |
| 183185 | 1 | 0 | 0 | 0 | 0 |
| 183245 | 1 | 0 | 0 | 0 | 0 |
| 187188 | 1 | 0 | 0 | 0 | 0 |
| 187189 | 1 | 0 | 0 | 0 | 0 |
| 187235 | 1 | 0 | 0 | 0 | 0 |
| 190191 | 1 | 0 | 0 | 0 | 0 |
| 190192 | 1 | 0 | 0 | 0 | 0 |

|        |   |   |   |   |   |
|--------|---|---|---|---|---|
| 190193 | 1 | 0 | 0 | 0 | 0 |
| 193194 | 1 | 0 | 0 | 0 | 0 |
| 193195 | 1 | 0 | 0 | 0 | 0 |
| 193196 | 1 | 0 | 0 | 0 | 0 |
| 196197 | 1 | 0 | 0 | 0 | 0 |
| 196204 | 2 | 0 | 0 | 0 | 0 |
| 197198 | 1 | 0 | 0 | 0 | 0 |
| 198199 | 1 | 0 | 0 | 0 | 0 |
| 198200 | 1 | 0 | 0 | 0 | 0 |
| 198201 | 1 | 0 | 0 | 0 | 0 |
| 201202 | 1 | 0 | 0 | 0 | 0 |
| 201203 | 1 | 0 | 0 | 0 | 0 |
| 201205 | 1 | 0 | 0 | 0 | 0 |
| 205206 | 1 | 0 | 0 | 0 | 0 |
| 206207 | 1 | 0 | 0 | 0 | 0 |
| 206214 | 2 | 0 | 0 | 0 | 0 |
| 207208 | 1 | 0 | 0 | 0 | 0 |
| 207209 | 2 | 0 | 0 | 0 | 0 |
| 209210 | 1 | 0 | 0 | 0 | 0 |
| 209211 | 1 | 0 | 0 | 0 | 0 |
| 211212 | 2 | 0 | 0 | 0 | 0 |
| 211216 | 1 | 0 | 0 | 0 | 0 |
| 212213 | 1 | 0 | 0 | 0 | 0 |
| 212214 | 1 | 0 | 0 | 0 | 0 |
| 214215 | 1 | 0 | 0 | 0 | 0 |
| 216217 | 1 | 0 | 0 | 0 | 0 |
| 216218 | 1 | 0 | 0 | 0 | 0 |
| 216222 | 1 | 0 | 0 | 0 | 0 |
| 217226 | 1 | 0 | 0 | 0 | 0 |
| 217233 | 2 | 0 | 0 | 0 | 0 |
| 218219 | 1 | 0 | 0 | 0 | 0 |
| 218220 | 1 | 0 | 0 | 0 | 0 |
| 218221 | 1 | 0 | 0 | 0 | 0 |
| 222223 | 1 | 0 | 0 | 0 | 0 |
| 222224 | 1 | 0 | 0 | 0 | 0 |
| 222225 | 1 | 0 | 0 | 0 | 0 |
| 226227 | 1 | 0 | 0 | 0 | 0 |
| 226228 | 2 | 0 | 0 | 0 | 0 |
| 228229 | 1 | 0 | 0 | 0 | 0 |
| 228230 | 1 | 0 | 0 | 0 | 0 |
| 230231 | 2 | 0 | 0 | 0 | 0 |
| 230235 | 1 | 0 | 0 | 0 | 0 |
| 231232 | 1 | 0 | 0 | 0 | 0 |
| 231233 | 1 | 0 | 0 | 0 | 0 |
| 233234 | 1 | 0 | 0 | 0 | 0 |
| 236237 | 1 | 0 | 0 | 0 | 0 |
| 236238 | 1 | 0 | 0 | 0 | 0 |
| 236239 | 1 | 0 | 0 | 0 | 0 |
| 236245 | 1 | 0 | 0 | 0 | 0 |
| 239240 | 1 | 0 | 0 | 0 | 0 |
| 239241 | 1 | 0 | 0 | 0 | 0 |
| 239242 | 1 | 0 | 0 | 0 | 0 |
| 242243 | 1 | 0 | 0 | 0 | 0 |
| 242244 | 1 | 0 | 0 | 0 | 0 |
| 242246 | 1 | 0 | 0 | 0 | 0 |
| 245247 | 1 | 0 | 0 | 0 | 0 |
| 246250 | 1 | 0 | 0 | 0 | 0 |
| 246268 | 1 | 0 | 0 | 0 | 0 |
| 247248 | 1 | 0 | 0 | 0 | 0 |
| 247249 | 1 | 0 | 0 | 0 | 0 |
| 247250 | 1 | 0 | 0 | 0 | 0 |
| 250251 | 1 | 0 | 0 | 0 | 0 |
| 250252 | 1 | 0 | 0 | 0 | 0 |
| 253254 | 1 | 0 | 0 | 0 | 0 |
| 253255 | 1 | 0 | 0 | 0 | 0 |
| 253256 | 1 | 0 | 0 | 0 | 0 |
| 253265 | 1 | 0 | 0 | 0 | 0 |
| 256257 | 1 | 0 | 0 | 0 | 0 |
| 257258 | 1 | 0 | 0 | 0 | 0 |
| 257264 | 2 | 0 | 0 | 0 | 0 |
| 258259 | 1 | 0 | 0 | 0 | 0 |
| 258260 | 1 | 0 | 0 | 0 | 0 |
| 258261 | 1 | 0 | 0 | 0 | 0 |
| 261262 | 1 | 0 | 0 | 0 | 0 |
| 261263 | 1 | 0 | 0 | 0 | 0 |
| 261323 | 1 | 0 | 0 | 0 | 0 |
| 265266 | 1 | 0 | 0 | 0 | 0 |
| 265267 | 1 | 0 | 0 | 0 | 0 |
| 265313 | 1 | 0 | 0 | 0 | 0 |
| 268269 | 1 | 0 | 0 | 0 | 0 |
| 268270 | 1 | 0 | 0 | 0 | 0 |

|        |   |   |   |   |   |
|--------|---|---|---|---|---|
| 268271 | 1 | 0 | 0 | 0 | 0 |
| 271272 | 1 | 0 | 0 | 0 | 0 |
| 271273 | 1 | 0 | 0 | 0 | 0 |
| 271274 | 1 | 0 | 0 | 0 | 0 |
| 274275 | 1 | 0 | 0 | 0 | 0 |
| 274282 | 2 | 0 | 0 | 0 | 0 |
| 275276 | 1 | 0 | 0 | 0 | 0 |
| 276277 | 1 | 0 | 0 | 0 | 0 |
| 276278 | 1 | 0 | 0 | 0 | 0 |
| 276279 | 1 | 0 | 0 | 0 | 0 |
| 279280 | 1 | 0 | 0 | 0 | 0 |
| 279281 | 1 | 0 | 0 | 0 | 0 |
| 279283 | 1 | 0 | 0 | 0 | 0 |
| 283284 | 1 | 0 | 0 | 0 | 0 |
| 284285 | 1 | 0 | 0 | 0 | 0 |
| 284292 | 2 | 0 | 0 | 0 | 0 |
| 285286 | 1 | 0 | 0 | 0 | 0 |
| 285287 | 2 | 0 | 0 | 0 | 0 |
| 287288 | 1 | 0 | 0 | 0 | 0 |
| 287289 | 1 | 0 | 0 | 0 | 0 |
| 289290 | 2 | 0 | 0 | 0 | 0 |
| 289294 | 1 | 0 | 0 | 0 | 0 |
| 290291 | 1 | 0 | 0 | 0 | 0 |
| 290292 | 1 | 0 | 0 | 0 | 0 |
| 292293 | 1 | 0 | 0 | 0 | 0 |
| 294295 | 1 | 0 | 0 | 0 | 0 |
| 294296 | 1 | 0 | 0 | 0 | 0 |
| 294300 | 1 | 0 | 0 | 0 | 0 |
| 295304 | 1 | 0 | 0 | 0 | 0 |
| 295311 | 2 | 0 | 0 | 0 | 0 |
| 296297 | 1 | 0 | 0 | 0 | 0 |
| 296298 | 1 | 0 | 0 | 0 | 0 |
| 296299 | 1 | 0 | 0 | 0 | 0 |
| 300301 | 1 | 0 | 0 | 0 | 0 |
| 300302 | 1 | 0 | 0 | 0 | 0 |
| 300303 | 1 | 0 | 0 | 0 | 0 |
| 304305 | 1 | 0 | 0 | 0 | 0 |
| 304306 | 2 | 0 | 0 | 0 | 0 |
| 306307 | 1 | 0 | 0 | 0 | 0 |
| 306308 | 1 | 0 | 0 | 0 | 0 |
| 308309 | 2 | 0 | 0 | 0 | 0 |
| 308313 | 1 | 0 | 0 | 0 | 0 |
| 309310 | 1 | 0 | 0 | 0 | 0 |
| 309311 | 1 | 0 | 0 | 0 | 0 |
| 311312 | 1 | 0 | 0 | 0 | 0 |
| 314315 | 1 | 0 | 0 | 0 | 0 |
| 314316 | 1 | 0 | 0 | 0 | 0 |
| 314317 | 1 | 0 | 0 | 0 | 0 |
| 314323 | 1 | 0 | 0 | 0 | 0 |
| 317318 | 1 | 0 | 0 | 0 | 0 |
| 317319 | 1 | 0 | 0 | 0 | 0 |
| 317320 | 1 | 0 | 0 | 0 | 0 |
| 320321 | 1 | 0 | 0 | 0 | 0 |
| 320322 | 1 | 0 | 0 | 0 | 0 |
| 320324 | 1 | 0 | 0 | 0 | 0 |
| 323325 | 1 | 0 | 0 | 0 | 0 |
| 324328 | 1 | 0 | 0 | 0 | 0 |
| 324346 | 1 | 0 | 0 | 0 | 0 |
| 325326 | 1 | 0 | 0 | 0 | 0 |
| 325327 | 1 | 0 | 0 | 0 | 0 |
| 325328 | 1 | 0 | 0 | 0 | 0 |
| 328329 | 1 | 0 | 0 | 0 | 0 |
| 328330 | 1 | 0 | 0 | 0 | 0 |
| 331332 | 1 | 0 | 0 | 0 | 0 |
| 331333 | 1 | 0 | 0 | 0 | 0 |
| 331334 | 1 | 0 | 0 | 0 | 0 |
| 331343 | 1 | 0 | 0 | 0 | 0 |
| 334335 | 1 | 0 | 0 | 0 | 0 |
| 335336 | 1 | 0 | 0 | 0 | 0 |
| 335342 | 2 | 0 | 0 | 0 | 0 |
| 336337 | 1 | 0 | 0 | 0 | 0 |
| 336338 | 1 | 0 | 0 | 0 | 0 |
| 336339 | 1 | 0 | 0 | 0 | 0 |
| 339340 | 1 | 0 | 0 | 0 | 0 |
| 339341 | 1 | 0 | 0 | 0 | 0 |
| 339401 | 1 | 0 | 0 | 0 | 0 |
| 343344 | 1 | 0 | 0 | 0 | 0 |
| 343345 | 1 | 0 | 0 | 0 | 0 |
| 343391 | 1 | 0 | 0 | 0 | 0 |
| 346347 | 1 | 0 | 0 | 0 | 0 |
| 346348 | 1 | 0 | 0 | 0 | 0 |

```

346349 1 0 0 0 0
349350 1 0 0 0 0
349351 1 0 0 0 0
349352 1 0 0 0 0
352353 1 0 0 0 0
352360 2 0 0 0 0
353354 1 0 0 0 0
354355 1 0 0 0 0
354356 1 0 0 0 0
354357 1 0 0 0 0
357358 1 0 0 0 0
357359 1 0 0 0 0
357361 1 0 0 0 0
361362 1 0 0 0 0
362363 1 0 0 0 0
362370 2 0 0 0 0
363364 1 0 0 0 0
363365 2 0 0 0 0
365366 1 0 0 0 0
365367 1 0 0 0 0
367368 2 0 0 0 0
367372 1 0 0 0 0
368369 1 0 0 0 0
368370 1 0 0 0 0
370371 1 0 0 0 0
372373 1 0 0 0 0
372374 1 0 0 0 0
372378 1 0 0 0 0
373382 1 0 0 0 0
373389 2 0 0 0 0
374375 1 0 0 0 0
374376 1 0 0 0 0
374377 1 0 0 0 0
378379 1 0 0 0 0
378380 1 0 0 0 0
378381 1 0 0 0 0
382383 1 0 0 0 0
382384 2 0 0 0 0
384385 1 0 0 0 0
384386 1 0 0 0 0
386387 2 0 0 0 0
386391 1 0 0 0 0
387388 1 0 0 0 0
387389 1 0 0 0 0
389390 1 0 0 0 0
392393 1 0 0 0 0
392394 1 0 0 0 0
392395 1 0 0 0 0
392401 1 0 0 0 0
395396 1 0 0 0 0
395397 1 0 0 0 0
395398 1 0 0 0 0
398399 1 0 0 0 0
398400 1 0 0 0 0
398402 1 0 0 0 0
401404 1 0 0 0 0
402403 1 0 0 0 0
402407 1 0 0 0 0
404405 1 0 0 0 0
404406 1 0 0 0 0
404407 1 0 0 0 0
407408 1 0 0 0 0
407409 1 0 0 0 0
M END
> <NAME>
D70_12

```

```

$$$$
D86_12
MOE2012 3D

```

```

451460 0 0 1 0 0 0 0 0999 V2000
28.3950 38.4840 -15.1750 C 0 0 0 0 0 0 0 0 0 0 0 0 0 0 0
27.7830 37.5730 -15.1430 H 0 0 0 0 0 0 0 0 0 0 0 0 0 0 0
27.9220 39.1790 -14.4690 H 0 0 0 0 0 0 0 0 0 0 0 0 0 0 0
29.7800 38.1720 -14.7730 N 0 0 0 0 0 0 0 0 0 0 0 0 0 0 0
29.7660 37.3430 -13.5470 C 0 0 0 0 0 0 0 0 0 0 0 0 0 0 0
29.3940 37.9270 -12.6940 H 0 0 0 0 0 0 0 0 0 0 0 0 0 0 0
29.0670 36.5080 -13.6890 H 0 0 0 0 0 0 0 0 0 0 0 0 0 0 0
31.1410 36.7270 -13.2150 C 0 0 0 0 0 0 0 0 0 0 0 0 0 0 0
31.4790 36.1350 -14.0740 H 0 0 0 0 0 0 0 0 0 0 0 0 0 0 0

```













|          |         |         |   |   |   |   |   |   |   |   |   |   |   |   |   |   |
|----------|---------|---------|---|---|---|---|---|---|---|---|---|---|---|---|---|---|
| 99.7500  | 14.5070 | 0.6790  | H | 0 | 0 | 0 | 0 | 0 | 0 | 0 | 0 | 0 | 0 | 0 | 0 | 0 |
| 100.2910 | 15.3570 | -0.7690 | H | 0 | 0 | 0 | 0 | 0 | 0 | 0 | 0 | 0 | 0 | 0 | 0 | 0 |
| 102.3140 | 13.2680 | 0.9680  | C | 0 | 0 | 0 | 0 | 0 | 0 | 0 | 0 | 0 | 0 | 0 | 0 | 0 |
| 101.5170 | 13.0820 | 1.6860  | H | 0 | 0 | 0 | 0 | 0 | 0 | 0 | 0 | 0 | 0 | 0 | 0 | 0 |
| 103.6190 | 13.4220 | 1.4540  | C | 0 | 0 | 0 | 0 | 0 | 0 | 0 | 0 | 0 | 0 | 0 | 0 | 0 |
| 103.7730 | 13.3520 | 2.5250  | H | 0 | 0 | 0 | 0 | 0 | 0 | 0 | 0 | 0 | 0 | 0 | 0 | 0 |
| 104.6690 | 13.6570 | 0.5700  | C | 0 | 0 | 0 | 0 | 0 | 0 | 0 | 0 | 0 | 0 | 0 | 0 | 0 |
| 104.4000 | 13.7320 | -0.7960 | C | 0 | 0 | 0 | 0 | 0 | 0 | 0 | 0 | 0 | 0 | 0 | 0 | 0 |
| 105.2120 | 13.9150 | -1.4950 | H | 0 | 0 | 0 | 0 | 0 | 0 | 0 | 0 | 0 | 0 | 0 | 0 | 0 |
| 103.0960 | 13.5790 | -1.2830 | C | 0 | 0 | 0 | 0 | 0 | 0 | 0 | 0 | 0 | 0 | 0 | 0 | 0 |
| 102.9510 | 13.6540 | -2.3560 | H | 0 | 0 | 0 | 0 | 0 | 0 | 0 | 0 | 0 | 0 | 0 | 0 | 0 |
| 105.9830 | 13.8310 | 0.9070  | O | 0 | 0 | 0 | 0 | 0 | 0 | 0 | 0 | 0 | 0 | 0 | 0 | 0 |
| 114.2190 | 15.1650 | 11.2840 | C | 0 | 0 | 0 | 0 | 0 | 0 | 0 | 0 | 0 | 0 | 0 | 0 | 0 |
| 113.3310 | 15.7020 | 11.6440 | H | 0 | 0 | 0 | 0 | 0 | 0 | 0 | 0 | 0 | 0 | 0 | 0 | 0 |
| 114.1670 | 14.1710 | 11.7480 | H | 0 | 0 | 0 | 0 | 0 | 0 | 0 | 0 | 0 | 0 | 0 | 0 | 0 |
| 114.1890 | 15.0740 | 9.8110  | N | 0 | 0 | 0 | 0 | 0 | 0 | 0 | 0 | 0 | 0 | 0 | 0 | 0 |
| 112.8350 | 14.6730 | 9.3650  | C | 0 | 0 | 0 | 0 | 0 | 0 | 0 | 0 | 0 | 0 | 0 | 0 | 0 |
| 112.6070 | 13.6550 | 9.7090  | H | 0 | 0 | 0 | 0 | 0 | 0 | 0 | 0 | 0 | 0 | 0 | 0 | 0 |
| 112.0970 | 15.3390 | 9.8320  | H | 0 | 0 | 0 | 0 | 0 | 0 | 0 | 0 | 0 | 0 | 0 | 0 | 0 |
| 112.6290 | 14.7740 | 7.8380  | C | 0 | 0 | 0 | 0 | 0 | 0 | 0 | 0 | 0 | 0 | 0 | 0 | 0 |
| 112.8470 | 15.8000 | 7.5160  | H | 0 | 0 | 0 | 0 | 0 | 0 | 0 | 0 | 0 | 0 | 0 | 0 | 0 |
| 113.3180 | 14.1000 | 7.3180  | H | 0 | 0 | 0 | 0 | 0 | 0 | 0 | 0 | 0 | 0 | 0 | 0 | 0 |
| 111.2480 | 14.4240 | 7.4690  | N | 0 | 0 | 3 | 0 | 0 | 0 | 0 | 0 | 0 | 0 | 0 | 0 | 0 |
| 111.0470 | 13.4730 | 7.7800  | H | 0 | 0 | 0 | 0 | 0 | 0 | 0 | 0 | 0 | 0 | 0 | 0 | 0 |
| 115.2270 | 14.1590 | 9.3000  | C | 0 | 0 | 0 | 0 | 0 | 0 | 0 | 0 | 0 | 0 | 0 | 0 | 0 |
| 115.8820 | 13.7860 | 10.0990 | H | 0 | 0 | 0 | 0 | 0 | 0 | 0 | 0 | 0 | 0 | 0 | 0 | 0 |
| 114.8030 | 13.2420 | 8.8710  | H | 0 | 0 | 0 | 0 | 0 | 0 | 0 | 0 | 0 | 0 | 0 | 0 | 0 |
| 115.4360 | 15.9340 | 11.8140 | C | 0 | 0 | 0 | 0 | 0 | 0 | 0 | 0 | 0 | 0 | 0 | 0 | 0 |
| 116.3760 | 15.4330 | 11.5650 | H | 0 | 0 | 0 | 0 | 0 | 0 | 0 | 0 | 0 | 0 | 0 | 0 | 0 |
| 115.4590 | 16.9490 | 11.4040 | H | 0 | 0 | 0 | 0 | 0 | 0 | 0 | 0 | 0 | 0 | 0 | 0 | 0 |
| 115.3510 | 16.0260 | 13.2330 | O | 0 | 0 | 0 | 0 | 0 | 0 | 0 | 0 | 0 | 0 | 0 | 0 | 0 |
| 116.1260 | 16.5300 | 13.5330 | H | 0 | 0 | 0 | 0 | 0 | 0 | 0 | 0 | 0 | 0 | 0 | 0 | 0 |
| 116.1020 | 14.8630 | 8.2600  | C | 0 | 0 | 0 | 0 | 0 | 0 | 0 | 0 | 0 | 0 | 0 | 0 | 0 |
| 115.5110 | 15.2190 | 7.4110  | H | 0 | 0 | 0 | 0 | 0 | 0 | 0 | 0 | 0 | 0 | 0 | 0 | 0 |
| 116.6260 | 15.7140 | 8.7080  | H | 0 | 0 | 0 | 0 | 0 | 0 | 0 | 0 | 0 | 0 | 0 | 0 | 0 |
| 117.0760 | 13.9470 | 7.7690  | O | 0 | 0 | 0 | 0 | 0 | 0 | 0 | 0 | 0 | 0 | 0 | 0 | 0 |
| 117.6620 | 14.4450 | 7.1730  | H | 0 | 0 | 0 | 0 | 0 | 0 | 0 | 0 | 0 | 0 | 0 | 0 | 0 |
| 1        | 2       | 1       | 0 | 0 | 0 | 0 |   |   |   |   |   |   |   |   |   |   |
| 1        | 3       | 1       | 0 | 0 | 0 | 0 |   |   |   |   |   |   |   |   |   |   |
| 1        | 4       | 1       | 0 | 0 | 0 | 0 |   |   |   |   |   |   |   |   |   |   |
| 1        | 16      | 1       | 0 | 0 | 0 | 0 |   |   |   |   |   |   |   |   |   |   |
| 4        | 5       | 1       | 0 | 0 | 0 | 0 |   |   |   |   |   |   |   |   |   |   |
| 4        | 13      | 1       | 0 | 0 | 0 | 0 |   |   |   |   |   |   |   |   |   |   |
| 5        | 6       | 1       | 0 | 0 | 0 | 0 |   |   |   |   |   |   |   |   |   |   |
| 5        | 7       | 1       | 0 | 0 | 0 | 0 |   |   |   |   |   |   |   |   |   |   |
| 5        | 8       | 1       | 0 | 0 | 0 | 0 |   |   |   |   |   |   |   |   |   |   |
| 8        | 9       | 1       | 0 | 0 | 0 | 0 |   |   |   |   |   |   |   |   |   |   |
| 8        | 10      | 1       | 0 | 0 | 0 | 0 |   |   |   |   |   |   |   |   |   |   |
| 8        | 11      | 1       | 0 | 0 | 0 | 0 |   |   |   |   |   |   |   |   |   |   |
| 11       | 12      | 1       | 0 | 0 | 0 | 0 |   |   |   |   |   |   |   |   |   |   |
| 11       | 41      | 1       | 0 | 0 | 0 | 0 |   |   |   |   |   |   |   |   |   |   |
| 13       | 14      | 1       | 0 | 0 | 0 | 0 |   |   |   |   |   |   |   |   |   |   |
| 13       | 15      | 1       | 0 | 0 | 0 | 0 |   |   |   |   |   |   |   |   |   |   |
| 13       | 21      | 1       | 0 | 0 | 0 | 0 |   |   |   |   |   |   |   |   |   |   |
| 16       | 17      | 1       | 0 | 0 | 0 | 0 |   |   |   |   |   |   |   |   |   |   |
| 16       | 18      | 1       | 0 | 0 | 0 | 0 |   |   |   |   |   |   |   |   |   |   |
| 16       | 19      | 1       | 0 | 0 | 0 | 0 |   |   |   |   |   |   |   |   |   |   |
| 19       | 20      | 1       | 0 | 0 | 0 | 0 |   |   |   |   |   |   |   |   |   |   |
| 21       | 22      | 1       | 0 | 0 | 0 | 0 |   |   |   |   |   |   |   |   |   |   |
| 21       | 23      | 1       | 0 | 0 | 0 | 0 |   |   |   |   |   |   |   |   |   |   |
| 21       | 24      | 1       | 0 | 0 | 0 | 0 |   |   |   |   |   |   |   |   |   |   |
| 24       | 25      | 1       | 0 | 0 | 0 | 0 |   |   |   |   |   |   |   |   |   |   |
| 26       | 27      | 1       | 0 | 0 | 0 | 0 |   |   |   |   |   |   |   |   |   |   |
| 26       | 28      | 1       | 0 | 0 | 0 | 0 |   |   |   |   |   |   |   |   |   |   |
| 26       | 29      | 1       | 0 | 0 | 0 | 0 |   |   |   |   |   |   |   |   |   |   |
| 26       | 38      | 1       | 0 | 0 | 0 | 0 |   |   |   |   |   |   |   |   |   |   |
| 29       | 30      | 1       | 0 | 0 | 0 | 0 |   |   |   |   |   |   |   |   |   |   |
| 30       | 31      | 1       | 0 | 0 | 0 | 0 |   |   |   |   |   |   |   |   |   |   |
| 30       | 37      | 2       | 0 | 0 | 0 | 0 |   |   |   |   |   |   |   |   |   |   |
| 31       | 32      | 1       | 0 | 0 | 0 | 0 |   |   |   |   |   |   |   |   |   |   |
| 31       | 33      | 1       | 0 | 0 | 0 | 0 |   |   |   |   |   |   |   |   |   |   |
| 31       | 34      | 1       | 0 | 0 | 0 | 0 |   |   |   |   |   |   |   |   |   |   |
| 34       | 35      | 1       | 0 | 0 | 0 | 0 |   |   |   |   |   |   |   |   |   |   |
| 34       | 36      | 1       | 0 | 0 | 0 | 0 |   |   |   |   |   |   |   |   |   |   |
| 34       | 97      | 1       | 0 | 0 | 0 | 0 |   |   |   |   |   |   |   |   |   |   |
| 38       | 39      | 1       | 0 | 0 | 0 | 0 |   |   |   |   |   |   |   |   |   |   |
| 38       | 40      | 1       | 0 | 0 | 0 | 0 |   |   |   |   |   |   |   |   |   |   |
| 38       | 86      | 1       | 0 | 0 | 0 | 0 |   |   |   |   |   |   |   |   |   |   |
| 41       | 42      | 1       | 0 | 0 | 0 | 0 |   |   |   |   |   |   |   |   |   |   |
| 41       | 43      | 1       | 0 | 0 | 0 | 0 |   |   |   |   |   |   |   |   |   |   |
| 41       | 44      | 1       | 0 | 0 | 0 | 0 |   |   |   |   |   |   |   |   |   |   |

|     |     |   |   |   |   |   |
|-----|-----|---|---|---|---|---|
| 44  | 45  | 1 | 0 | 0 | 0 | 0 |
| 44  | 46  | 1 | 0 | 0 | 0 | 0 |
| 44  | 47  | 1 | 0 | 0 | 0 | 0 |
| 47  | 48  | 1 | 0 | 0 | 0 | 0 |
| 47  | 55  | 2 | 0 | 0 | 0 | 0 |
| 48  | 49  | 1 | 0 | 0 | 0 | 0 |
| 49  | 50  | 1 | 0 | 0 | 0 | 0 |
| 49  | 51  | 1 | 0 | 0 | 0 | 0 |
| 49  | 52  | 1 | 0 | 0 | 0 | 0 |
| 52  | 53  | 1 | 0 | 0 | 0 | 0 |
| 52  | 54  | 1 | 0 | 0 | 0 | 0 |
| 52  | 56  | 1 | 0 | 0 | 0 | 0 |
| 56  | 57  | 1 | 0 | 0 | 0 | 0 |
| 57  | 58  | 1 | 0 | 0 | 0 | 0 |
| 57  | 65  | 2 | 0 | 0 | 0 | 0 |
| 58  | 59  | 1 | 0 | 0 | 0 | 0 |
| 58  | 60  | 2 | 0 | 0 | 0 | 0 |
| 60  | 61  | 1 | 0 | 0 | 0 | 0 |
| 60  | 62  | 1 | 0 | 0 | 0 | 0 |
| 62  | 63  | 2 | 0 | 0 | 0 | 0 |
| 62  | 67  | 1 | 0 | 0 | 0 | 0 |
| 63  | 64  | 1 | 0 | 0 | 0 | 0 |
| 63  | 65  | 1 | 0 | 0 | 0 | 0 |
| 65  | 66  | 1 | 0 | 0 | 0 | 0 |
| 67  | 68  | 1 | 0 | 0 | 0 | 0 |
| 67  | 69  | 1 | 0 | 0 | 0 | 0 |
| 67  | 73  | 1 | 0 | 0 | 0 | 0 |
| 68  | 77  | 1 | 0 | 0 | 0 | 0 |
| 68  | 84  | 2 | 0 | 0 | 0 | 0 |
| 69  | 70  | 1 | 0 | 0 | 0 | 0 |
| 69  | 71  | 1 | 0 | 0 | 0 | 0 |
| 69  | 72  | 1 | 0 | 0 | 0 | 0 |
| 73  | 74  | 1 | 0 | 0 | 0 | 0 |
| 73  | 75  | 1 | 0 | 0 | 0 | 0 |
| 73  | 76  | 1 | 0 | 0 | 0 | 0 |
| 77  | 78  | 1 | 0 | 0 | 0 | 0 |
| 77  | 79  | 2 | 0 | 0 | 0 | 0 |
| 79  | 80  | 1 | 0 | 0 | 0 | 0 |
| 79  | 81  | 1 | 0 | 0 | 0 | 0 |
| 81  | 82  | 2 | 0 | 0 | 0 | 0 |
| 81  | 86  | 1 | 0 | 0 | 0 | 0 |
| 82  | 83  | 1 | 0 | 0 | 0 | 0 |
| 82  | 84  | 1 | 0 | 0 | 0 | 0 |
| 84  | 85  | 1 | 0 | 0 | 0 | 0 |
| 87  | 88  | 1 | 0 | 0 | 0 | 0 |
| 87  | 89  | 1 | 0 | 0 | 0 | 0 |
| 87  | 90  | 1 | 0 | 0 | 0 | 0 |
| 87  | 101 | 1 | 0 | 0 | 0 | 0 |
| 90  | 91  | 1 | 0 | 0 | 0 | 0 |
| 90  | 98  | 1 | 0 | 0 | 0 | 0 |
| 91  | 92  | 1 | 0 | 0 | 0 | 0 |
| 91  | 93  | 1 | 0 | 0 | 0 | 0 |
| 91  | 94  | 1 | 0 | 0 | 0 | 0 |
| 94  | 95  | 1 | 0 | 0 | 0 | 0 |
| 94  | 96  | 1 | 0 | 0 | 0 | 0 |
| 94  | 97  | 1 | 0 | 0 | 0 | 0 |
| 97  | 126 | 1 | 0 | 0 | 0 | 0 |
| 98  | 99  | 1 | 0 | 0 | 0 | 0 |
| 98  | 100 | 1 | 0 | 0 | 0 | 0 |
| 98  | 106 | 1 | 0 | 0 | 0 | 0 |
| 101 | 102 | 1 | 0 | 0 | 0 | 0 |
| 101 | 103 | 1 | 0 | 0 | 0 | 0 |
| 101 | 104 | 1 | 0 | 0 | 0 | 0 |
| 104 | 105 | 1 | 0 | 0 | 0 | 0 |
| 106 | 107 | 1 | 0 | 0 | 0 | 0 |
| 106 | 108 | 1 | 0 | 0 | 0 | 0 |
| 106 | 109 | 1 | 0 | 0 | 0 | 0 |
| 109 | 110 | 1 | 0 | 0 | 0 | 0 |
| 111 | 112 | 1 | 0 | 0 | 0 | 0 |
| 111 | 113 | 1 | 0 | 0 | 0 | 0 |
| 111 | 114 | 1 | 0 | 0 | 0 | 0 |
| 111 | 123 | 1 | 0 | 0 | 0 | 0 |
| 114 | 115 | 1 | 0 | 0 | 0 | 0 |
| 115 | 116 | 1 | 0 | 0 | 0 | 0 |
| 115 | 122 | 2 | 0 | 0 | 0 | 0 |
| 116 | 117 | 1 | 0 | 0 | 0 | 0 |
| 116 | 118 | 1 | 0 | 0 | 0 | 0 |
| 116 | 119 | 1 | 0 | 0 | 0 | 0 |
| 119 | 120 | 1 | 0 | 0 | 0 | 0 |
| 119 | 121 | 1 | 0 | 0 | 0 | 0 |
| 119 | 182 | 1 | 0 | 0 | 0 | 0 |

|        |   |   |   |   |   |
|--------|---|---|---|---|---|
| 123124 | 1 | 0 | 0 | 0 | 0 |
| 123125 | 1 | 0 | 0 | 0 | 0 |
| 123171 | 1 | 0 | 0 | 0 | 0 |
| 126127 | 1 | 0 | 0 | 0 | 0 |
| 126128 | 1 | 0 | 0 | 0 | 0 |
| 126129 | 1 | 0 | 0 | 0 | 0 |
| 129130 | 1 | 0 | 0 | 0 | 0 |
| 129131 | 1 | 0 | 0 | 0 | 0 |
| 129132 | 1 | 0 | 0 | 0 | 0 |
| 132133 | 1 | 0 | 0 | 0 | 0 |
| 132140 | 2 | 0 | 0 | 0 | 0 |
| 133134 | 1 | 0 | 0 | 0 | 0 |
| 134135 | 1 | 0 | 0 | 0 | 0 |
| 134136 | 1 | 0 | 0 | 0 | 0 |
| 134137 | 1 | 0 | 0 | 0 | 0 |
| 137138 | 1 | 0 | 0 | 0 | 0 |
| 137139 | 1 | 0 | 0 | 0 | 0 |
| 137141 | 1 | 0 | 0 | 0 | 0 |
| 141142 | 1 | 0 | 0 | 0 | 0 |
| 142143 | 1 | 0 | 0 | 0 | 0 |
| 142150 | 2 | 0 | 0 | 0 | 0 |
| 143144 | 1 | 0 | 0 | 0 | 0 |
| 143145 | 2 | 0 | 0 | 0 | 0 |
| 145146 | 1 | 0 | 0 | 0 | 0 |
| 145147 | 1 | 0 | 0 | 0 | 0 |
| 147148 | 2 | 0 | 0 | 0 | 0 |
| 147152 | 1 | 0 | 0 | 0 | 0 |
| 148149 | 1 | 0 | 0 | 0 | 0 |
| 148150 | 1 | 0 | 0 | 0 | 0 |
| 150151 | 1 | 0 | 0 | 0 | 0 |
| 152153 | 1 | 0 | 0 | 0 | 0 |
| 152154 | 1 | 0 | 0 | 0 | 0 |
| 152158 | 1 | 0 | 0 | 0 | 0 |
| 153162 | 1 | 0 | 0 | 0 | 0 |
| 153169 | 2 | 0 | 0 | 0 | 0 |
| 154155 | 1 | 0 | 0 | 0 | 0 |
| 154156 | 1 | 0 | 0 | 0 | 0 |
| 154157 | 1 | 0 | 0 | 0 | 0 |
| 158159 | 1 | 0 | 0 | 0 | 0 |
| 158160 | 1 | 0 | 0 | 0 | 0 |
| 158161 | 1 | 0 | 0 | 0 | 0 |
| 162163 | 1 | 0 | 0 | 0 | 0 |
| 162164 | 2 | 0 | 0 | 0 | 0 |
| 164165 | 1 | 0 | 0 | 0 | 0 |
| 164166 | 1 | 0 | 0 | 0 | 0 |
| 166167 | 2 | 0 | 0 | 0 | 0 |
| 166171 | 1 | 0 | 0 | 0 | 0 |
| 167168 | 1 | 0 | 0 | 0 | 0 |
| 167169 | 1 | 0 | 0 | 0 | 0 |
| 169170 | 1 | 0 | 0 | 0 | 0 |
| 172173 | 1 | 0 | 0 | 0 | 0 |
| 172174 | 1 | 0 | 0 | 0 | 0 |
| 172175 | 1 | 0 | 0 | 0 | 0 |
| 172186 | 1 | 0 | 0 | 0 | 0 |
| 175176 | 1 | 0 | 0 | 0 | 0 |
| 175183 | 1 | 0 | 0 | 0 | 0 |
| 176177 | 1 | 0 | 0 | 0 | 0 |
| 176178 | 1 | 0 | 0 | 0 | 0 |
| 176179 | 1 | 0 | 0 | 0 | 0 |
| 179180 | 1 | 0 | 0 | 0 | 0 |
| 179181 | 1 | 0 | 0 | 0 | 0 |
| 179182 | 1 | 0 | 0 | 0 | 0 |
| 182211 | 1 | 0 | 0 | 0 | 0 |
| 183184 | 1 | 0 | 0 | 0 | 0 |
| 183185 | 1 | 0 | 0 | 0 | 0 |
| 183191 | 1 | 0 | 0 | 0 | 0 |
| 186187 | 1 | 0 | 0 | 0 | 0 |
| 186188 | 1 | 0 | 0 | 0 | 0 |
| 186189 | 1 | 0 | 0 | 0 | 0 |
| 189190 | 1 | 0 | 0 | 0 | 0 |
| 191192 | 1 | 0 | 0 | 0 | 0 |
| 191193 | 1 | 0 | 0 | 0 | 0 |
| 191194 | 1 | 0 | 0 | 0 | 0 |
| 194195 | 1 | 0 | 0 | 0 | 0 |
| 196197 | 1 | 0 | 0 | 0 | 0 |
| 196198 | 1 | 0 | 0 | 0 | 0 |
| 196199 | 1 | 0 | 0 | 0 | 0 |
| 196208 | 1 | 0 | 0 | 0 | 0 |
| 199200 | 1 | 0 | 0 | 0 | 0 |
| 200201 | 1 | 0 | 0 | 0 | 0 |
| 200207 | 2 | 0 | 0 | 0 | 0 |

|        |   |   |   |   |   |
|--------|---|---|---|---|---|
| 201202 | 1 | 0 | 0 | 0 | 0 |
| 201203 | 1 | 0 | 0 | 0 | 0 |
| 201204 | 1 | 0 | 0 | 0 | 0 |
| 204205 | 1 | 0 | 0 | 0 | 0 |
| 204206 | 1 | 0 | 0 | 0 | 0 |
| 204267 | 1 | 0 | 0 | 0 | 0 |
| 208209 | 1 | 0 | 0 | 0 | 0 |
| 208210 | 1 | 0 | 0 | 0 | 0 |
| 208256 | 1 | 0 | 0 | 0 | 0 |
| 211212 | 1 | 0 | 0 | 0 | 0 |
| 211213 | 1 | 0 | 0 | 0 | 0 |
| 211214 | 1 | 0 | 0 | 0 | 0 |
| 214215 | 1 | 0 | 0 | 0 | 0 |
| 214216 | 1 | 0 | 0 | 0 | 0 |
| 214217 | 1 | 0 | 0 | 0 | 0 |
| 217218 | 1 | 0 | 0 | 0 | 0 |
| 217225 | 2 | 0 | 0 | 0 | 0 |
| 218219 | 1 | 0 | 0 | 0 | 0 |
| 219220 | 1 | 0 | 0 | 0 | 0 |
| 219221 | 1 | 0 | 0 | 0 | 0 |
| 219222 | 1 | 0 | 0 | 0 | 0 |
| 222223 | 1 | 0 | 0 | 0 | 0 |
| 222224 | 1 | 0 | 0 | 0 | 0 |
| 222226 | 1 | 0 | 0 | 0 | 0 |
| 226227 | 1 | 0 | 0 | 0 | 0 |
| 227228 | 1 | 0 | 0 | 0 | 0 |
| 227235 | 2 | 0 | 0 | 0 | 0 |
| 228229 | 1 | 0 | 0 | 0 | 0 |
| 228230 | 2 | 0 | 0 | 0 | 0 |
| 230231 | 1 | 0 | 0 | 0 | 0 |
| 230232 | 1 | 0 | 0 | 0 | 0 |
| 232233 | 2 | 0 | 0 | 0 | 0 |
| 232237 | 1 | 0 | 0 | 0 | 0 |
| 233234 | 1 | 0 | 0 | 0 | 0 |
| 233235 | 1 | 0 | 0 | 0 | 0 |
| 235236 | 1 | 0 | 0 | 0 | 0 |
| 237238 | 1 | 0 | 0 | 0 | 0 |
| 237239 | 1 | 0 | 0 | 0 | 0 |
| 237243 | 1 | 0 | 0 | 0 | 0 |
| 238247 | 1 | 0 | 0 | 0 | 0 |
| 238254 | 2 | 0 | 0 | 0 | 0 |
| 239240 | 1 | 0 | 0 | 0 | 0 |
| 239241 | 1 | 0 | 0 | 0 | 0 |
| 239242 | 1 | 0 | 0 | 0 | 0 |
| 243244 | 1 | 0 | 0 | 0 | 0 |
| 243245 | 1 | 0 | 0 | 0 | 0 |
| 243246 | 1 | 0 | 0 | 0 | 0 |
| 247248 | 1 | 0 | 0 | 0 | 0 |
| 247249 | 2 | 0 | 0 | 0 | 0 |
| 249250 | 1 | 0 | 0 | 0 | 0 |
| 249251 | 1 | 0 | 0 | 0 | 0 |
| 251252 | 2 | 0 | 0 | 0 | 0 |
| 251256 | 1 | 0 | 0 | 0 | 0 |
| 252253 | 1 | 0 | 0 | 0 | 0 |
| 252254 | 1 | 0 | 0 | 0 | 0 |
| 254255 | 1 | 0 | 0 | 0 | 0 |
| 257258 | 1 | 0 | 0 | 0 | 0 |
| 257259 | 1 | 0 | 0 | 0 | 0 |
| 257260 | 1 | 0 | 0 | 0 | 0 |
| 257271 | 1 | 0 | 0 | 0 | 0 |
| 260261 | 1 | 0 | 0 | 0 | 0 |
| 260268 | 1 | 0 | 0 | 0 | 0 |
| 261262 | 1 | 0 | 0 | 0 | 0 |
| 261263 | 1 | 0 | 0 | 0 | 0 |
| 261264 | 1 | 0 | 0 | 0 | 0 |
| 264265 | 1 | 0 | 0 | 0 | 0 |
| 264266 | 1 | 0 | 0 | 0 | 0 |
| 264267 | 1 | 0 | 0 | 0 | 0 |
| 267296 | 1 | 0 | 0 | 0 | 0 |
| 268269 | 1 | 0 | 0 | 0 | 0 |
| 268270 | 1 | 0 | 0 | 0 | 0 |
| 268276 | 1 | 0 | 0 | 0 | 0 |
| 271272 | 1 | 0 | 0 | 0 | 0 |
| 271273 | 1 | 0 | 0 | 0 | 0 |
| 271274 | 1 | 0 | 0 | 0 | 0 |
| 274275 | 1 | 0 | 0 | 0 | 0 |
| 276277 | 1 | 0 | 0 | 0 | 0 |
| 276278 | 1 | 0 | 0 | 0 | 0 |
| 276279 | 1 | 0 | 0 | 0 | 0 |
| 279280 | 1 | 0 | 0 | 0 | 0 |
| 281282 | 1 | 0 | 0 | 0 | 0 |

|        |   |   |   |   |   |
|--------|---|---|---|---|---|
| 281283 | 1 | 0 | 0 | 0 | 0 |
| 281284 | 1 | 0 | 0 | 0 | 0 |
| 281293 | 1 | 0 | 0 | 0 | 0 |
| 284285 | 1 | 0 | 0 | 0 | 0 |
| 285286 | 1 | 0 | 0 | 0 | 0 |
| 285292 | 2 | 0 | 0 | 0 | 0 |
| 286287 | 1 | 0 | 0 | 0 | 0 |
| 286288 | 1 | 0 | 0 | 0 | 0 |
| 286289 | 1 | 0 | 0 | 0 | 0 |
| 289290 | 1 | 0 | 0 | 0 | 0 |
| 289291 | 1 | 0 | 0 | 0 | 0 |
| 289352 | 1 | 0 | 0 | 0 | 0 |
| 293294 | 1 | 0 | 0 | 0 | 0 |
| 293295 | 1 | 0 | 0 | 0 | 0 |
| 293341 | 1 | 0 | 0 | 0 | 0 |
| 296297 | 1 | 0 | 0 | 0 | 0 |
| 296298 | 1 | 0 | 0 | 0 | 0 |
| 296299 | 1 | 0 | 0 | 0 | 0 |
| 299300 | 1 | 0 | 0 | 0 | 0 |
| 299301 | 1 | 0 | 0 | 0 | 0 |
| 299302 | 1 | 0 | 0 | 0 | 0 |
| 302303 | 1 | 0 | 0 | 0 | 0 |
| 302310 | 2 | 0 | 0 | 0 | 0 |
| 303304 | 1 | 0 | 0 | 0 | 0 |
| 304305 | 1 | 0 | 0 | 0 | 0 |
| 304306 | 1 | 0 | 0 | 0 | 0 |
| 304307 | 1 | 0 | 0 | 0 | 0 |
| 307308 | 1 | 0 | 0 | 0 | 0 |
| 307309 | 1 | 0 | 0 | 0 | 0 |
| 307311 | 1 | 0 | 0 | 0 | 0 |
| 311312 | 1 | 0 | 0 | 0 | 0 |
| 312313 | 1 | 0 | 0 | 0 | 0 |
| 312320 | 2 | 0 | 0 | 0 | 0 |
| 313314 | 1 | 0 | 0 | 0 | 0 |
| 313315 | 2 | 0 | 0 | 0 | 0 |
| 315316 | 1 | 0 | 0 | 0 | 0 |
| 315317 | 1 | 0 | 0 | 0 | 0 |
| 317318 | 2 | 0 | 0 | 0 | 0 |
| 317322 | 1 | 0 | 0 | 0 | 0 |
| 318319 | 1 | 0 | 0 | 0 | 0 |
| 318320 | 1 | 0 | 0 | 0 | 0 |
| 320321 | 1 | 0 | 0 | 0 | 0 |
| 322323 | 1 | 0 | 0 | 0 | 0 |
| 322324 | 1 | 0 | 0 | 0 | 0 |
| 322328 | 1 | 0 | 0 | 0 | 0 |
| 323332 | 1 | 0 | 0 | 0 | 0 |
| 323339 | 2 | 0 | 0 | 0 | 0 |
| 324325 | 1 | 0 | 0 | 0 | 0 |
| 324326 | 1 | 0 | 0 | 0 | 0 |
| 324327 | 1 | 0 | 0 | 0 | 0 |
| 328329 | 1 | 0 | 0 | 0 | 0 |
| 328330 | 1 | 0 | 0 | 0 | 0 |
| 328331 | 1 | 0 | 0 | 0 | 0 |
| 332333 | 1 | 0 | 0 | 0 | 0 |
| 332334 | 2 | 0 | 0 | 0 | 0 |
| 334335 | 1 | 0 | 0 | 0 | 0 |
| 334336 | 1 | 0 | 0 | 0 | 0 |
| 336337 | 2 | 0 | 0 | 0 | 0 |
| 336341 | 1 | 0 | 0 | 0 | 0 |
| 337338 | 1 | 0 | 0 | 0 | 0 |
| 337339 | 1 | 0 | 0 | 0 | 0 |
| 339340 | 1 | 0 | 0 | 0 | 0 |
| 342343 | 1 | 0 | 0 | 0 | 0 |
| 342344 | 1 | 0 | 0 | 0 | 0 |
| 342345 | 1 | 0 | 0 | 0 | 0 |
| 342356 | 1 | 0 | 0 | 0 | 0 |
| 345346 | 1 | 0 | 0 | 0 | 0 |
| 345353 | 1 | 0 | 0 | 0 | 0 |
| 346347 | 1 | 0 | 0 | 0 | 0 |
| 346348 | 1 | 0 | 0 | 0 | 0 |
| 346349 | 1 | 0 | 0 | 0 | 0 |
| 349350 | 1 | 0 | 0 | 0 | 0 |
| 349351 | 1 | 0 | 0 | 0 | 0 |
| 349352 | 1 | 0 | 0 | 0 | 0 |
| 352381 | 1 | 0 | 0 | 0 | 0 |
| 353354 | 1 | 0 | 0 | 0 | 0 |
| 353355 | 1 | 0 | 0 | 0 | 0 |
| 353361 | 1 | 0 | 0 | 0 | 0 |
| 356357 | 1 | 0 | 0 | 0 | 0 |
| 356358 | 1 | 0 | 0 | 0 | 0 |
| 356359 | 1 | 0 | 0 | 0 | 0 |

|        |   |   |   |   |   |
|--------|---|---|---|---|---|
| 359360 | 1 | 0 | 0 | 0 | 0 |
| 361362 | 1 | 0 | 0 | 0 | 0 |
| 361363 | 1 | 0 | 0 | 0 | 0 |
| 361364 | 1 | 0 | 0 | 0 | 0 |
| 364365 | 1 | 0 | 0 | 0 | 0 |
| 366367 | 1 | 0 | 0 | 0 | 0 |
| 366368 | 1 | 0 | 0 | 0 | 0 |
| 366369 | 1 | 0 | 0 | 0 | 0 |
| 366378 | 1 | 0 | 0 | 0 | 0 |
| 369370 | 1 | 0 | 0 | 0 | 0 |
| 370371 | 1 | 0 | 0 | 0 | 0 |
| 370377 | 2 | 0 | 0 | 0 | 0 |
| 371372 | 1 | 0 | 0 | 0 | 0 |
| 371373 | 1 | 0 | 0 | 0 | 0 |
| 371374 | 1 | 0 | 0 | 0 | 0 |
| 374375 | 1 | 0 | 0 | 0 | 0 |
| 374376 | 1 | 0 | 0 | 0 | 0 |
| 374437 | 1 | 0 | 0 | 0 | 0 |
| 378379 | 1 | 0 | 0 | 0 | 0 |
| 378380 | 1 | 0 | 0 | 0 | 0 |
| 378426 | 1 | 0 | 0 | 0 | 0 |
| 381382 | 1 | 0 | 0 | 0 | 0 |
| 381383 | 1 | 0 | 0 | 0 | 0 |
| 381384 | 1 | 0 | 0 | 0 | 0 |
| 384385 | 1 | 0 | 0 | 0 | 0 |
| 384386 | 1 | 0 | 0 | 0 | 0 |
| 384387 | 1 | 0 | 0 | 0 | 0 |
| 387388 | 1 | 0 | 0 | 0 | 0 |
| 387395 | 2 | 0 | 0 | 0 | 0 |
| 388389 | 1 | 0 | 0 | 0 | 0 |
| 389390 | 1 | 0 | 0 | 0 | 0 |
| 389391 | 1 | 0 | 0 | 0 | 0 |
| 389392 | 1 | 0 | 0 | 0 | 0 |
| 392393 | 1 | 0 | 0 | 0 | 0 |
| 392394 | 1 | 0 | 0 | 0 | 0 |
| 392396 | 1 | 0 | 0 | 0 | 0 |
| 396397 | 1 | 0 | 0 | 0 | 0 |
| 397398 | 1 | 0 | 0 | 0 | 0 |
| 397405 | 2 | 0 | 0 | 0 | 0 |
| 398399 | 1 | 0 | 0 | 0 | 0 |
| 398400 | 2 | 0 | 0 | 0 | 0 |
| 400401 | 1 | 0 | 0 | 0 | 0 |
| 400402 | 1 | 0 | 0 | 0 | 0 |
| 402403 | 2 | 0 | 0 | 0 | 0 |
| 402407 | 1 | 0 | 0 | 0 | 0 |
| 403404 | 1 | 0 | 0 | 0 | 0 |
| 403405 | 1 | 0 | 0 | 0 | 0 |
| 405406 | 1 | 0 | 0 | 0 | 0 |
| 407408 | 1 | 0 | 0 | 0 | 0 |
| 407409 | 1 | 0 | 0 | 0 | 0 |
| 407413 | 1 | 0 | 0 | 0 | 0 |
| 408417 | 1 | 0 | 0 | 0 | 0 |
| 408424 | 2 | 0 | 0 | 0 | 0 |
| 409410 | 1 | 0 | 0 | 0 | 0 |
| 409411 | 1 | 0 | 0 | 0 | 0 |
| 409412 | 1 | 0 | 0 | 0 | 0 |
| 413414 | 1 | 0 | 0 | 0 | 0 |
| 413415 | 1 | 0 | 0 | 0 | 0 |
| 413416 | 1 | 0 | 0 | 0 | 0 |
| 417418 | 1 | 0 | 0 | 0 | 0 |
| 417419 | 2 | 0 | 0 | 0 | 0 |
| 419420 | 1 | 0 | 0 | 0 | 0 |
| 419421 | 1 | 0 | 0 | 0 | 0 |
| 421422 | 2 | 0 | 0 | 0 | 0 |
| 421426 | 1 | 0 | 0 | 0 | 0 |
| 422423 | 1 | 0 | 0 | 0 | 0 |
| 422424 | 1 | 0 | 0 | 0 | 0 |
| 424425 | 1 | 0 | 0 | 0 | 0 |
| 427428 | 1 | 0 | 0 | 0 | 0 |
| 427429 | 1 | 0 | 0 | 0 | 0 |
| 427430 | 1 | 0 | 0 | 0 | 0 |
| 427442 | 1 | 0 | 0 | 0 | 0 |
| 430431 | 1 | 0 | 0 | 0 | 0 |
| 430439 | 1 | 0 | 0 | 0 | 0 |
| 431432 | 1 | 0 | 0 | 0 | 0 |
| 431433 | 1 | 0 | 0 | 0 | 0 |
| 431434 | 1 | 0 | 0 | 0 | 0 |
| 434435 | 1 | 0 | 0 | 0 | 0 |
| 434436 | 1 | 0 | 0 | 0 | 0 |
| 434437 | 1 | 0 | 0 | 0 | 0 |
| 437438 | 1 | 0 | 0 | 0 | 0 |

439440 1 0 0 0 0  
439441 1 0 0 0 0  
439447 1 0 0 0 0  
442443 1 0 0 0 0  
442444 1 0 0 0 0  
442445 1 0 0 0 0  
445446 1 0 0 0 0  
447448 1 0 0 0 0  
447449 1 0 0 0 0  
447450 1 0 0 0 0  
450451 1 0 0 0 0

M END  
> <NAME>  
D86\_12

\$\$\$  
D87\_12  
MOE2012 3D

469478 0 0 1 0 0 0 0 0999 V2000  
74.7210 -0.4400 -37.2580 C 0 0 0 0 0 0 0 0 0 0 0 0 0 0 0  
75.6880 -0.8930 -37.5080 H 0 0 0 0 0 0 0 0 0 0 0 0 0 0 0  
74.3530 -0.0180 -38.2030 H 0 0 0 0 0 0 0 0 0 0 0 0 0 0 0  
73.7870 -1.4530 -36.7210 N 0 0 0 0 0 0 0 0 0 0 0 0 0 0 0  
72.3940 -0.9620 -36.7900 C 0 0 0 0 0 0 0 0 0 0 0 0 0 0 0  
72.3530 0.1060 -36.5430 H 0 0 0 0 0 0 0 0 0 0 0 0 0 0 0  
71.9970 -1.0560 -37.8090 H 0 0 0 0 0 0 0 0 0 0 0 0 0 0 0  
71.4870 -1.6840 -35.7830 C 0 0 0 0 0 0 0 0 0 0 0 0 0 0 0  
71.4580 -2.7600 -35.9860 H 0 0 0 0 0 0 0 0 0 0 0 0 0 0 0  
71.8940 -1.5580 -34.7720 H 0 0 0 0 0 0 0 0 0 0 0 0 0 0 0  
70.0620 -1.1240 -35.8380 C 0 0 0 0 0 0 0 0 0 0 0 0 0 0 0  
70.0840 -0.0490 -35.6230 H 0 0 0 0 0 0 0 0 0 0 0 0 0 0 0  
69.6530 -1.2620 -36.8460 H 0 0 0 0 0 0 0 0 0 0 0 0 0 0 0  
73.9250 -2.7240 -37.4640 C 0 0 0 0 0 0 0 0 0 0 0 0 0 0 0  
73.0480 -3.3650 -37.3130 H 0 0 0 0 0 0 0 0 0 0 0 0 0 0 0  
73.9630 -2.5510 -38.5490 H 0 0 0 0 0 0 0 0 0 0 0 0 0 0 0  
69.2250 -1.8110 -34.8530 N 0 0 0 3 0 0 0 0 0 0 0 0 0 0 0  
69.2310 -2.8140 -35.0410 H 0 0 0 0 0 0 0 0 0 0 0 0 0 0 0  
75.0190 0.6820 -36.2560 C 0 0 0 0 0 0 0 0 0 0 0 0 0 0 0  
74.1240 1.2580 -36.0040 H 0 0 0 0 0 0 0 0 0 0 0 0 0 0 0  
75.4460 0.2720 -35.3350 H 0 0 0 0 0 0 0 0 0 0 0 0 0 0 0  
75.9670 1.5780 -36.8280 O 0 0 0 0 0 0 0 0 0 0 0 0 0 0 0  
76.1730 2.2480 -36.1530 H 0 0 0 0 0 0 0 0 0 0 0 0 0 0 0  
75.1400 -3.5430 -37.0150 C 0 0 0 0 0 0 0 0 0 0 0 0 0 0 0  
76.0820 -3.0320 -37.2330 H 0 0 0 0 0 0 0 0 0 0 0 0 0 0 0  
75.0900 -3.7500 -35.9410 H 0 0 0 0 0 0 0 0 0 0 0 0 0 0 0  
75.1460 -4.7880 -37.7080 O 0 0 0 0 0 0 0 0 0 0 0 0 0 0 0  
75.9230 -5.2830 -37.3950 H 0 0 0 0 0 0 0 0 0 0 0 0 0 0 0  
53.5010 6.7760 -31.7060 C 0 0 0 0 0 0 0 0 0 0 0 0 0 0 0  
53.5930 5.7000 -31.5250 H 0 0 0 0 0 0 0 0 0 0 0 0 0 0 0  
53.2210 6.8830 -32.7610 H 0 0 0 0 0 0 0 0 0 0 0 0 0 0 0  
52.4550 7.2580 -30.8440 O 0 0 0 0 0 0 0 0 0 0 0 0 0 0 0  
51.9260 8.4760 -31.1500 C 0 0 0 0 0 0 0 0 0 0 0 0 0 0 0  
50.9270 8.8850 -30.0940 C 0 0 0 0 0 0 0 0 0 0 0 0 0 0 0  
49.9200 8.7660 -30.5080 H 0 0 0 0 0 0 0 0 0 0 0 0 0 0 0  
51.0220 8.2000 -29.2450 H 0 0 0 0 0 0 0 0 0 0 0 0 0 0 0  
51.1970 10.3290 -29.6580 C 0 0 0 0 0 0 0 0 0 0 0 0 0 0 0  
52.2760 10.4860 -29.5340 H 0 0 0 0 0 0 0 0 0 0 0 0 0 0 0  
50.9350 11.0020 -30.4860 H 0 0 0 0 0 0 0 0 0 0 0 0 0 0 0  
52.2310 9.1550 -32.1190 O 0 0 0 0 0 0 0 0 0 0 0 0 0 0 0  
54.8200 7.4840 -31.4040 C 0 0 0 0 0 0 0 0 0 0 0 0 0 0 0  
54.8050 8.4770 -31.8680 H 0 0 0 0 0 0 0 0 0 0 0 0 0 0 0  
54.9490 7.6800 -30.3320 H 0 0 0 0 0 0 0 0 0 0 0 0 0 0 0  
67.8500 -1.3090 -34.8830 C 0 0 0 0 0 0 0 0 0 0 0 0 0 0 0  
67.8390 -0.2280 -34.6930 H 0 0 0 0 0 0 0 0 0 0 0 0 0 0 0  
67.4050 -1.4780 -35.8710 H 0 0 0 0 0 0 0 0 0 0 0 0 0 0 0  
67.0250 -2.0200 -33.8130 C 0 0 0 0 0 0 0 0 0 0 0 0 0 0 0  
67.0220 -3.1000 -33.9980 H 0 0 0 0 0 0 0 0 0 0 0 0 0 0 0  
67.4500 -1.8270 -32.8210 H 0 0 0 0 0 0 0 0 0 0 0 0 0 0 0  
65.5960 -1.5410 -33.8140 C 0 0 0 0 0 0 0 0 0 0 0 0 0 0 0  
64.8930 -2.2260 -32.8660 O 0 0 0 0 0 0 0 0 0 0 0 0 0 0 0  
63.4910 -1.9290 -32.7870 C 0 0 0 0 0 0 0 0 0 0 0 0 0 0 0  
63.0490 -1.8280 -33.7870 H 0 0 0 0 0 0 0 0 0 0 0 0 0 0 0  
63.0000 -2.7980 -32.3330 H 0 0 0 0 0 0 0 0 0 0 0 0 0 0 0  
63.2330 -0.6910 -31.9360 C 0 0 0 0 0 0 0 0 0 0 0 0 0 0 0  
63.6810 -0.8380 -30.9460 H 0 0 0 0 0 0 0 0 0 0 0 0 0 0 0  
63.6950 0.1850 -32.4060 H 0 0 0 0 0 0 0 0 0 0 0 0 0 0 0  
65.1320 -0.6750 -34.5420 O 0 0 0 0 0 0 0 0 0 0 0 0 0 0 0  
61.8220 -0.5160 -31.8320 O 0 0 0 0 0 0 0 0 0 0 0 0 0 0 0  
61.3740 0.5270 -31.0700 C 0 0 0 0 0 0 0 0 0 0 0 0 0 0 0  
59.9870 0.6190 -30.9630 C 0 0 0 0 0 0 0 0 0 0 0 0 0 0 0













|         |         |          |   |   |   |   |   |   |   |   |   |   |   |   |   |   |
|---------|---------|----------|---|---|---|---|---|---|---|---|---|---|---|---|---|---|
| 57.5560 | 36.6040 | -45.2960 | H | 0 | 0 | 0 | 0 | 0 | 0 | 0 | 0 | 0 | 0 | 0 | 0 | 0 |
| 57.1130 | 37.6170 | -47.0230 | O | 0 | 0 | 0 | 0 | 0 | 0 | 0 | 0 | 0 | 0 | 0 | 0 | 0 |
| 56.5250 | 38.1810 | -46.4900 | H | 0 | 0 | 0 | 0 | 0 | 0 | 0 | 0 | 0 | 0 | 0 | 0 | 0 |
| 1       | 2       | 1        | 0 | 0 | 0 | 0 | 0 | 0 | 0 | 0 | 0 | 0 | 0 | 0 | 0 | 0 |
| 1       | 3       | 1        | 0 | 0 | 0 | 0 | 0 | 0 | 0 | 0 | 0 | 0 | 0 | 0 | 0 | 0 |
| 1       | 4       | 1        | 0 | 0 | 0 | 0 | 0 | 0 | 0 | 0 | 0 | 0 | 0 | 0 | 0 | 0 |
| 1       | 19      | 1        | 0 | 0 | 0 | 0 | 0 | 0 | 0 | 0 | 0 | 0 | 0 | 0 | 0 | 0 |
| 4       | 5       | 1        | 0 | 0 | 0 | 0 | 0 | 0 | 0 | 0 | 0 | 0 | 0 | 0 | 0 | 0 |
| 4       | 14      | 1        | 0 | 0 | 0 | 0 | 0 | 0 | 0 | 0 | 0 | 0 | 0 | 0 | 0 | 0 |
| 5       | 6       | 1        | 0 | 0 | 0 | 0 | 0 | 0 | 0 | 0 | 0 | 0 | 0 | 0 | 0 | 0 |
| 5       | 7       | 1        | 0 | 0 | 0 | 0 | 0 | 0 | 0 | 0 | 0 | 0 | 0 | 0 | 0 | 0 |
| 5       | 8       | 1        | 0 | 0 | 0 | 0 | 0 | 0 | 0 | 0 | 0 | 0 | 0 | 0 | 0 | 0 |
| 8       | 9       | 1        | 0 | 0 | 0 | 0 | 0 | 0 | 0 | 0 | 0 | 0 | 0 | 0 | 0 | 0 |
| 8       | 10      | 1        | 0 | 0 | 0 | 0 | 0 | 0 | 0 | 0 | 0 | 0 | 0 | 0 | 0 | 0 |
| 8       | 11      | 1        | 0 | 0 | 0 | 0 | 0 | 0 | 0 | 0 | 0 | 0 | 0 | 0 | 0 | 0 |
| 11      | 12      | 1        | 0 | 0 | 0 | 0 | 0 | 0 | 0 | 0 | 0 | 0 | 0 | 0 | 0 | 0 |
| 11      | 13      | 1        | 0 | 0 | 0 | 0 | 0 | 0 | 0 | 0 | 0 | 0 | 0 | 0 | 0 | 0 |
| 11      | 17      | 1        | 0 | 0 | 0 | 0 | 0 | 0 | 0 | 0 | 0 | 0 | 0 | 0 | 0 | 0 |
| 14      | 15      | 1        | 0 | 0 | 0 | 0 | 0 | 0 | 0 | 0 | 0 | 0 | 0 | 0 | 0 | 0 |
| 14      | 16      | 1        | 0 | 0 | 0 | 0 | 0 | 0 | 0 | 0 | 0 | 0 | 0 | 0 | 0 | 0 |
| 14      | 24      | 1        | 0 | 0 | 0 | 0 | 0 | 0 | 0 | 0 | 0 | 0 | 0 | 0 | 0 | 0 |
| 17      | 18      | 1        | 0 | 0 | 0 | 0 | 0 | 0 | 0 | 0 | 0 | 0 | 0 | 0 | 0 | 0 |
| 17      | 44      | 1        | 0 | 0 | 0 | 0 | 0 | 0 | 0 | 0 | 0 | 0 | 0 | 0 | 0 | 0 |
| 19      | 20      | 1        | 0 | 0 | 0 | 0 | 0 | 0 | 0 | 0 | 0 | 0 | 0 | 0 | 0 | 0 |
| 19      | 21      | 1        | 0 | 0 | 0 | 0 | 0 | 0 | 0 | 0 | 0 | 0 | 0 | 0 | 0 | 0 |
| 19      | 22      | 1        | 0 | 0 | 0 | 0 | 0 | 0 | 0 | 0 | 0 | 0 | 0 | 0 | 0 | 0 |
| 22      | 23      | 1        | 0 | 0 | 0 | 0 | 0 | 0 | 0 | 0 | 0 | 0 | 0 | 0 | 0 | 0 |
| 24      | 25      | 1        | 0 | 0 | 0 | 0 | 0 | 0 | 0 | 0 | 0 | 0 | 0 | 0 | 0 | 0 |
| 24      | 26      | 1        | 0 | 0 | 0 | 0 | 0 | 0 | 0 | 0 | 0 | 0 | 0 | 0 | 0 | 0 |
| 24      | 27      | 1        | 0 | 0 | 0 | 0 | 0 | 0 | 0 | 0 | 0 | 0 | 0 | 0 | 0 | 0 |
| 27      | 28      | 1        | 0 | 0 | 0 | 0 | 0 | 0 | 0 | 0 | 0 | 0 | 0 | 0 | 0 | 0 |
| 29      | 30      | 1        | 0 | 0 | 0 | 0 | 0 | 0 | 0 | 0 | 0 | 0 | 0 | 0 | 0 | 0 |
| 29      | 31      | 1        | 0 | 0 | 0 | 0 | 0 | 0 | 0 | 0 | 0 | 0 | 0 | 0 | 0 | 0 |
| 29      | 32      | 1        | 0 | 0 | 0 | 0 | 0 | 0 | 0 | 0 | 0 | 0 | 0 | 0 | 0 | 0 |
| 29      | 41      | 1        | 0 | 0 | 0 | 0 | 0 | 0 | 0 | 0 | 0 | 0 | 0 | 0 | 0 | 0 |
| 32      | 33      | 1        | 0 | 0 | 0 | 0 | 0 | 0 | 0 | 0 | 0 | 0 | 0 | 0 | 0 | 0 |
| 33      | 34      | 1        | 0 | 0 | 0 | 0 | 0 | 0 | 0 | 0 | 0 | 0 | 0 | 0 | 0 | 0 |
| 33      | 40      | 2        | 0 | 0 | 0 | 0 | 0 | 0 | 0 | 0 | 0 | 0 | 0 | 0 | 0 | 0 |
| 34      | 35      | 1        | 0 | 0 | 0 | 0 | 0 | 0 | 0 | 0 | 0 | 0 | 0 | 0 | 0 | 0 |
| 34      | 36      | 1        | 0 | 0 | 0 | 0 | 0 | 0 | 0 | 0 | 0 | 0 | 0 | 0 | 0 | 0 |
| 34      | 37      | 1        | 0 | 0 | 0 | 0 | 0 | 0 | 0 | 0 | 0 | 0 | 0 | 0 | 0 | 0 |
| 37      | 38      | 1        | 0 | 0 | 0 | 0 | 0 | 0 | 0 | 0 | 0 | 0 | 0 | 0 | 0 | 0 |
| 37      | 39      | 1        | 0 | 0 | 0 | 0 | 0 | 0 | 0 | 0 | 0 | 0 | 0 | 0 | 0 | 0 |
| 37      | 106     | 1        | 0 | 0 | 0 | 0 | 0 | 0 | 0 | 0 | 0 | 0 | 0 | 0 | 0 | 0 |
| 41      | 42      | 1        | 0 | 0 | 0 | 0 | 0 | 0 | 0 | 0 | 0 | 0 | 0 | 0 | 0 | 0 |
| 41      | 43      | 1        | 0 | 0 | 0 | 0 | 0 | 0 | 0 | 0 | 0 | 0 | 0 | 0 | 0 | 0 |
| 41      | 89      | 1        | 0 | 0 | 0 | 0 | 0 | 0 | 0 | 0 | 0 | 0 | 0 | 0 | 0 | 0 |
| 44      | 45      | 1        | 0 | 0 | 0 | 0 | 0 | 0 | 0 | 0 | 0 | 0 | 0 | 0 | 0 | 0 |
| 44      | 46      | 1        | 0 | 0 | 0 | 0 | 0 | 0 | 0 | 0 | 0 | 0 | 0 | 0 | 0 | 0 |
| 44      | 47      | 1        | 0 | 0 | 0 | 0 | 0 | 0 | 0 | 0 | 0 | 0 | 0 | 0 | 0 | 0 |
| 47      | 48      | 1        | 0 | 0 | 0 | 0 | 0 | 0 | 0 | 0 | 0 | 0 | 0 | 0 | 0 | 0 |
| 47      | 49      | 1        | 0 | 0 | 0 | 0 | 0 | 0 | 0 | 0 | 0 | 0 | 0 | 0 | 0 | 0 |
| 47      | 50      | 1        | 0 | 0 | 0 | 0 | 0 | 0 | 0 | 0 | 0 | 0 | 0 | 0 | 0 | 0 |
| 50      | 51      | 1        | 0 | 0 | 0 | 0 | 0 | 0 | 0 | 0 | 0 | 0 | 0 | 0 | 0 | 0 |
| 50      | 58      | 2        | 0 | 0 | 0 | 0 | 0 | 0 | 0 | 0 | 0 | 0 | 0 | 0 | 0 | 0 |
| 51      | 52      | 1        | 0 | 0 | 0 | 0 | 0 | 0 | 0 | 0 | 0 | 0 | 0 | 0 | 0 | 0 |
| 52      | 53      | 1        | 0 | 0 | 0 | 0 | 0 | 0 | 0 | 0 | 0 | 0 | 0 | 0 | 0 | 0 |
| 52      | 54      | 1        | 0 | 0 | 0 | 0 | 0 | 0 | 0 | 0 | 0 | 0 | 0 | 0 | 0 | 0 |
| 52      | 55      | 1        | 0 | 0 | 0 | 0 | 0 | 0 | 0 | 0 | 0 | 0 | 0 | 0 | 0 | 0 |
| 55      | 56      | 1        | 0 | 0 | 0 | 0 | 0 | 0 | 0 | 0 | 0 | 0 | 0 | 0 | 0 | 0 |
| 55      | 57      | 1        | 0 | 0 | 0 | 0 | 0 | 0 | 0 | 0 | 0 | 0 | 0 | 0 | 0 | 0 |
| 55      | 59      | 1        | 0 | 0 | 0 | 0 | 0 | 0 | 0 | 0 | 0 | 0 | 0 | 0 | 0 | 0 |
| 59      | 60      | 1        | 0 | 0 | 0 | 0 | 0 | 0 | 0 | 0 | 0 | 0 | 0 | 0 | 0 | 0 |
| 60      | 61      | 1        | 0 | 0 | 0 | 0 | 0 | 0 | 0 | 0 | 0 | 0 | 0 | 0 | 0 | 0 |
| 60      | 68      | 2        | 0 | 0 | 0 | 0 | 0 | 0 | 0 | 0 | 0 | 0 | 0 | 0 | 0 | 0 |
| 61      | 62      | 1        | 0 | 0 | 0 | 0 | 0 | 0 | 0 | 0 | 0 | 0 | 0 | 0 | 0 | 0 |
| 61      | 63      | 2        | 0 | 0 | 0 | 0 | 0 | 0 | 0 | 0 | 0 | 0 | 0 | 0 | 0 | 0 |
| 63      | 64      | 1        | 0 | 0 | 0 | 0 | 0 | 0 | 0 | 0 | 0 | 0 | 0 | 0 | 0 | 0 |
| 63      | 65      | 1        | 0 | 0 | 0 | 0 | 0 | 0 | 0 | 0 | 0 | 0 | 0 | 0 | 0 | 0 |
| 65      | 66      | 2        | 0 | 0 | 0 | 0 | 0 | 0 | 0 | 0 | 0 | 0 | 0 | 0 | 0 | 0 |
| 65      | 70      | 1        | 0 | 0 | 0 | 0 | 0 | 0 | 0 | 0 | 0 | 0 | 0 | 0 | 0 | 0 |
| 66      | 67      | 1        | 0 | 0 | 0 | 0 | 0 | 0 | 0 | 0 | 0 | 0 | 0 | 0 | 0 | 0 |
| 66      | 68      | 1        | 0 | 0 | 0 | 0 | 0 | 0 | 0 | 0 | 0 | 0 | 0 | 0 | 0 | 0 |
| 68      | 69      | 1        | 0 | 0 | 0 | 0 | 0 | 0 | 0 | 0 | 0 | 0 | 0 | 0 | 0 | 0 |
| 70      | 71      | 1        | 0 | 0 | 0 | 0 | 0 | 0 | 0 | 0 | 0 | 0 | 0 | 0 | 0 | 0 |
| 70      | 72      | 1        | 0 | 0 | 0 | 0 | 0 | 0 | 0 | 0 | 0 | 0 | 0 | 0 | 0 | 0 |
| 70      | 76      | 1        | 0 | 0 | 0 | 0 | 0 | 0 | 0 | 0 | 0 | 0 | 0 | 0 | 0 | 0 |
| 71      | 80      | 1        | 0 | 0 | 0 | 0 | 0 | 0 | 0 | 0 | 0 | 0 | 0 | 0 | 0 | 0 |
| 71      | 87      | 2        | 0 | 0 | 0 | 0 | 0 | 0 | 0 | 0 | 0 | 0 | 0 | 0 | 0 | 0 |
| 72      | 73      | 1        | 0 | 0 | 0 | 0 | 0 | 0 | 0 | 0 | 0 | 0 | 0 | 0 | 0 | 0 |
| 72      | 74      | 1        | 0 | 0 | 0 | 0 | 0 | 0 | 0 | 0 | 0 | 0 | 0 | 0 | 0 | 0 |

|     |     |   |   |   |   |   |
|-----|-----|---|---|---|---|---|
| 72  | 75  | 1 | 0 | 0 | 0 | 0 |
| 76  | 77  | 1 | 0 | 0 | 0 | 0 |
| 76  | 78  | 1 | 0 | 0 | 0 | 0 |
| 76  | 79  | 1 | 0 | 0 | 0 | 0 |
| 80  | 81  | 1 | 0 | 0 | 0 | 0 |
| 80  | 82  | 2 | 0 | 0 | 0 | 0 |
| 82  | 83  | 1 | 0 | 0 | 0 | 0 |
| 82  | 84  | 1 | 0 | 0 | 0 | 0 |
| 84  | 85  | 2 | 0 | 0 | 0 | 0 |
| 84  | 89  | 1 | 0 | 0 | 0 | 0 |
| 85  | 86  | 1 | 0 | 0 | 0 | 0 |
| 85  | 87  | 1 | 0 | 0 | 0 | 0 |
| 87  | 88  | 1 | 0 | 0 | 0 | 0 |
| 90  | 91  | 1 | 0 | 0 | 0 | 0 |
| 90  | 92  | 1 | 0 | 0 | 0 | 0 |
| 90  | 93  | 1 | 0 | 0 | 0 | 0 |
| 90  | 107 | 1 | 0 | 0 | 0 | 0 |
| 93  | 94  | 1 | 0 | 0 | 0 | 0 |
| 93  | 103 | 1 | 0 | 0 | 0 | 0 |
| 94  | 95  | 1 | 0 | 0 | 0 | 0 |
| 94  | 96  | 1 | 0 | 0 | 0 | 0 |
| 94  | 97  | 1 | 0 | 0 | 0 | 0 |
| 97  | 98  | 1 | 0 | 0 | 0 | 0 |
| 97  | 99  | 1 | 0 | 0 | 0 | 0 |
| 97  | 100 | 1 | 0 | 0 | 0 | 0 |
| 100 | 101 | 1 | 0 | 0 | 0 | 0 |
| 100 | 102 | 1 | 0 | 0 | 0 | 0 |
| 100 | 106 | 1 | 0 | 0 | 0 | 0 |
| 103 | 104 | 1 | 0 | 0 | 0 | 0 |
| 103 | 105 | 1 | 0 | 0 | 0 | 0 |
| 103 | 112 | 1 | 0 | 0 | 0 | 0 |
| 106 | 132 | 1 | 0 | 0 | 0 | 0 |
| 107 | 108 | 1 | 0 | 0 | 0 | 0 |
| 107 | 109 | 1 | 0 | 0 | 0 | 0 |
| 107 | 110 | 1 | 0 | 0 | 0 | 0 |
| 110 | 111 | 1 | 0 | 0 | 0 | 0 |
| 112 | 113 | 1 | 0 | 0 | 0 | 0 |
| 112 | 114 | 1 | 0 | 0 | 0 | 0 |
| 112 | 115 | 1 | 0 | 0 | 0 | 0 |
| 115 | 116 | 1 | 0 | 0 | 0 | 0 |
| 117 | 118 | 1 | 0 | 0 | 0 | 0 |
| 117 | 119 | 1 | 0 | 0 | 0 | 0 |
| 117 | 120 | 1 | 0 | 0 | 0 | 0 |
| 117 | 129 | 1 | 0 | 0 | 0 | 0 |
| 120 | 121 | 1 | 0 | 0 | 0 | 0 |
| 121 | 122 | 1 | 0 | 0 | 0 | 0 |
| 121 | 128 | 2 | 0 | 0 | 0 | 0 |
| 122 | 123 | 1 | 0 | 0 | 0 | 0 |
| 122 | 124 | 1 | 0 | 0 | 0 | 0 |
| 122 | 125 | 1 | 0 | 0 | 0 | 0 |
| 125 | 126 | 1 | 0 | 0 | 0 | 0 |
| 125 | 127 | 1 | 0 | 0 | 0 | 0 |
| 125 | 194 | 1 | 0 | 0 | 0 | 0 |
| 129 | 130 | 1 | 0 | 0 | 0 | 0 |
| 129 | 131 | 1 | 0 | 0 | 0 | 0 |
| 129 | 177 | 1 | 0 | 0 | 0 | 0 |
| 132 | 133 | 1 | 0 | 0 | 0 | 0 |
| 132 | 134 | 1 | 0 | 0 | 0 | 0 |
| 132 | 135 | 1 | 0 | 0 | 0 | 0 |
| 135 | 136 | 1 | 0 | 0 | 0 | 0 |
| 135 | 137 | 1 | 0 | 0 | 0 | 0 |
| 135 | 138 | 1 | 0 | 0 | 0 | 0 |
| 138 | 139 | 1 | 0 | 0 | 0 | 0 |
| 138 | 146 | 2 | 0 | 0 | 0 | 0 |
| 139 | 140 | 1 | 0 | 0 | 0 | 0 |
| 140 | 141 | 1 | 0 | 0 | 0 | 0 |
| 140 | 142 | 1 | 0 | 0 | 0 | 0 |
| 140 | 143 | 1 | 0 | 0 | 0 | 0 |
| 143 | 144 | 1 | 0 | 0 | 0 | 0 |
| 143 | 145 | 1 | 0 | 0 | 0 | 0 |
| 143 | 147 | 1 | 0 | 0 | 0 | 0 |
| 147 | 148 | 1 | 0 | 0 | 0 | 0 |
| 148 | 149 | 1 | 0 | 0 | 0 | 0 |
| 148 | 156 | 2 | 0 | 0 | 0 | 0 |
| 149 | 150 | 1 | 0 | 0 | 0 | 0 |
| 149 | 151 | 2 | 0 | 0 | 0 | 0 |
| 151 | 152 | 1 | 0 | 0 | 0 | 0 |
| 151 | 153 | 1 | 0 | 0 | 0 | 0 |
| 153 | 154 | 2 | 0 | 0 | 0 | 0 |
| 153 | 158 | 1 | 0 | 0 | 0 | 0 |
| 154 | 155 | 1 | 0 | 0 | 0 | 0 |

|        |   |   |   |   |   |
|--------|---|---|---|---|---|
| 154156 | 1 | 0 | 0 | 0 | 0 |
| 156157 | 1 | 0 | 0 | 0 | 0 |
| 158159 | 1 | 0 | 0 | 0 | 0 |
| 158160 | 1 | 0 | 0 | 0 | 0 |
| 158164 | 1 | 0 | 0 | 0 | 0 |
| 159168 | 1 | 0 | 0 | 0 | 0 |
| 159175 | 2 | 0 | 0 | 0 | 0 |
| 160161 | 1 | 0 | 0 | 0 | 0 |
| 160162 | 1 | 0 | 0 | 0 | 0 |
| 160163 | 1 | 0 | 0 | 0 | 0 |
| 164165 | 1 | 0 | 0 | 0 | 0 |
| 164166 | 1 | 0 | 0 | 0 | 0 |
| 164167 | 1 | 0 | 0 | 0 | 0 |
| 168169 | 1 | 0 | 0 | 0 | 0 |
| 168170 | 2 | 0 | 0 | 0 | 0 |
| 170171 | 1 | 0 | 0 | 0 | 0 |
| 170172 | 1 | 0 | 0 | 0 | 0 |
| 172173 | 2 | 0 | 0 | 0 | 0 |
| 172177 | 1 | 0 | 0 | 0 | 0 |
| 173174 | 1 | 0 | 0 | 0 | 0 |
| 173175 | 1 | 0 | 0 | 0 | 0 |
| 175176 | 1 | 0 | 0 | 0 | 0 |
| 178179 | 1 | 0 | 0 | 0 | 0 |
| 178180 | 1 | 0 | 0 | 0 | 0 |
| 178181 | 1 | 0 | 0 | 0 | 0 |
| 178195 | 1 | 0 | 0 | 0 | 0 |
| 181182 | 1 | 0 | 0 | 0 | 0 |
| 181191 | 1 | 0 | 0 | 0 | 0 |
| 182183 | 1 | 0 | 0 | 0 | 0 |
| 182184 | 1 | 0 | 0 | 0 | 0 |
| 182185 | 1 | 0 | 0 | 0 | 0 |
| 185186 | 1 | 0 | 0 | 0 | 0 |
| 185187 | 1 | 0 | 0 | 0 | 0 |
| 185188 | 1 | 0 | 0 | 0 | 0 |
| 188189 | 1 | 0 | 0 | 0 | 0 |
| 188190 | 1 | 0 | 0 | 0 | 0 |
| 188194 | 1 | 0 | 0 | 0 | 0 |
| 191192 | 1 | 0 | 0 | 0 | 0 |
| 191193 | 1 | 0 | 0 | 0 | 0 |
| 191200 | 1 | 0 | 0 | 0 | 0 |
| 194220 | 1 | 0 | 0 | 0 | 0 |
| 195196 | 1 | 0 | 0 | 0 | 0 |
| 195197 | 1 | 0 | 0 | 0 | 0 |
| 195198 | 1 | 0 | 0 | 0 | 0 |
| 198199 | 1 | 0 | 0 | 0 | 0 |
| 200201 | 1 | 0 | 0 | 0 | 0 |
| 200202 | 1 | 0 | 0 | 0 | 0 |
| 200203 | 1 | 0 | 0 | 0 | 0 |
| 203204 | 1 | 0 | 0 | 0 | 0 |
| 205206 | 1 | 0 | 0 | 0 | 0 |
| 205207 | 1 | 0 | 0 | 0 | 0 |
| 205208 | 1 | 0 | 0 | 0 | 0 |
| 205217 | 1 | 0 | 0 | 0 | 0 |
| 208209 | 1 | 0 | 0 | 0 | 0 |
| 209210 | 1 | 0 | 0 | 0 | 0 |
| 209216 | 2 | 0 | 0 | 0 | 0 |
| 210211 | 1 | 0 | 0 | 0 | 0 |
| 210212 | 1 | 0 | 0 | 0 | 0 |
| 210213 | 1 | 0 | 0 | 0 | 0 |
| 213214 | 1 | 0 | 0 | 0 | 0 |
| 213215 | 1 | 0 | 0 | 0 | 0 |
| 213282 | 1 | 0 | 0 | 0 | 0 |
| 217218 | 1 | 0 | 0 | 0 | 0 |
| 217219 | 1 | 0 | 0 | 0 | 0 |
| 217265 | 1 | 0 | 0 | 0 | 0 |
| 220221 | 1 | 0 | 0 | 0 | 0 |
| 220222 | 1 | 0 | 0 | 0 | 0 |
| 220223 | 1 | 0 | 0 | 0 | 0 |
| 223224 | 1 | 0 | 0 | 0 | 0 |
| 223225 | 1 | 0 | 0 | 0 | 0 |
| 223226 | 1 | 0 | 0 | 0 | 0 |
| 226227 | 1 | 0 | 0 | 0 | 0 |
| 226234 | 2 | 0 | 0 | 0 | 0 |
| 227228 | 1 | 0 | 0 | 0 | 0 |
| 228229 | 1 | 0 | 0 | 0 | 0 |
| 228230 | 1 | 0 | 0 | 0 | 0 |
| 228231 | 1 | 0 | 0 | 0 | 0 |
| 231232 | 1 | 0 | 0 | 0 | 0 |
| 231233 | 1 | 0 | 0 | 0 | 0 |
| 231235 | 1 | 0 | 0 | 0 | 0 |
| 235236 | 1 | 0 | 0 | 0 | 0 |



|        |   |   |   |   |   |
|--------|---|---|---|---|---|
| 236237 | 1 | 0 | 0 | 0 | 0 |
| 236244 | 2 | 0 | 0 | 0 | 0 |
| 237238 | 1 | 0 | 0 | 0 | 0 |
| 237239 | 2 | 0 | 0 | 0 | 0 |
| 239240 | 1 | 0 | 0 | 0 | 0 |
| 239241 | 1 | 0 | 0 | 0 | 0 |
| 241242 | 2 | 0 | 0 | 0 | 0 |
| 241246 | 1 | 0 | 0 | 0 | 0 |
| 242243 | 1 | 0 | 0 | 0 | 0 |
| 242244 | 1 | 0 | 0 | 0 | 0 |
| 244245 | 1 | 0 | 0 | 0 | 0 |
| 246247 | 1 | 0 | 0 | 0 | 0 |
| 246248 | 1 | 0 | 0 | 0 | 0 |
| 246252 | 1 | 0 | 0 | 0 | 0 |
| 247256 | 1 | 0 | 0 | 0 | 0 |
| 247263 | 2 | 0 | 0 | 0 | 0 |
| 248249 | 1 | 0 | 0 | 0 | 0 |
| 248250 | 1 | 0 | 0 | 0 | 0 |
| 248251 | 1 | 0 | 0 | 0 | 0 |
| 252253 | 1 | 0 | 0 | 0 | 0 |
| 252254 | 1 | 0 | 0 | 0 | 0 |
| 252255 | 1 | 0 | 0 | 0 | 0 |
| 256257 | 1 | 0 | 0 | 0 | 0 |
| 256258 | 2 | 0 | 0 | 0 | 0 |
| 258259 | 1 | 0 | 0 | 0 | 0 |
| 258260 | 1 | 0 | 0 | 0 | 0 |
| 260261 | 2 | 0 | 0 | 0 | 0 |
| 260265 | 1 | 0 | 0 | 0 | 0 |
| 261262 | 1 | 0 | 0 | 0 | 0 |
| 261263 | 1 | 0 | 0 | 0 | 0 |
| 263264 | 1 | 0 | 0 | 0 | 0 |
| 266267 | 1 | 0 | 0 | 0 | 0 |
| 266268 | 1 | 0 | 0 | 0 | 0 |
| 266269 | 1 | 0 | 0 | 0 | 0 |
| 266283 | 1 | 0 | 0 | 0 | 0 |
| 269270 | 1 | 0 | 0 | 0 | 0 |
| 269279 | 1 | 0 | 0 | 0 | 0 |
| 270271 | 1 | 0 | 0 | 0 | 0 |
| 270272 | 1 | 0 | 0 | 0 | 0 |
| 270273 | 1 | 0 | 0 | 0 | 0 |
| 273274 | 1 | 0 | 0 | 0 | 0 |
| 273275 | 1 | 0 | 0 | 0 | 0 |
| 273276 | 1 | 0 | 0 | 0 | 0 |
| 276277 | 1 | 0 | 0 | 0 | 0 |
| 276278 | 1 | 0 | 0 | 0 | 0 |
| 276282 | 1 | 0 | 0 | 0 | 0 |
| 279280 | 1 | 0 | 0 | 0 | 0 |
| 279281 | 1 | 0 | 0 | 0 | 0 |
| 279288 | 1 | 0 | 0 | 0 | 0 |
| 282308 | 1 | 0 | 0 | 0 | 0 |
| 283284 | 1 | 0 | 0 | 0 | 0 |
| 283285 | 1 | 0 | 0 | 0 | 0 |
| 283286 | 1 | 0 | 0 | 0 | 0 |
| 286287 | 1 | 0 | 0 | 0 | 0 |
| 288289 | 1 | 0 | 0 | 0 | 0 |
| 288290 | 1 | 0 | 0 | 0 | 0 |
| 288291 | 1 | 0 | 0 | 0 | 0 |
| 291292 | 1 | 0 | 0 | 0 | 0 |
| 293294 | 1 | 0 | 0 | 0 | 0 |
| 293295 | 1 | 0 | 0 | 0 | 0 |
| 293296 | 1 | 0 | 0 | 0 | 0 |
| 293305 | 1 | 0 | 0 | 0 | 0 |
| 296297 | 1 | 0 | 0 | 0 | 0 |
| 297298 | 1 | 0 | 0 | 0 | 0 |
| 297304 | 2 | 0 | 0 | 0 | 0 |
| 298299 | 1 | 0 | 0 | 0 | 0 |
| 298300 | 1 | 0 | 0 | 0 | 0 |
| 298301 | 1 | 0 | 0 | 0 | 0 |
| 301302 | 1 | 0 | 0 | 0 | 0 |
| 301303 | 1 | 0 | 0 | 0 | 0 |
| 301370 | 1 | 0 | 0 | 0 | 0 |
| 305306 | 1 | 0 | 0 | 0 | 0 |
| 305307 | 1 | 0 | 0 | 0 | 0 |
| 305353 | 1 | 0 | 0 | 0 | 0 |
| 308309 | 1 | 0 | 0 | 0 | 0 |
| 308310 | 1 | 0 | 0 | 0 | 0 |
| 308311 | 1 | 0 | 0 | 0 | 0 |
| 311312 | 1 | 0 | 0 | 0 | 0 |
| 311313 | 1 | 0 | 0 | 0 | 0 |
| 311314 | 1 | 0 | 0 | 0 | 0 |
| 314315 | 1 | 0 | 0 | 0 | 0 |

|        |   |   |   |   |   |
|--------|---|---|---|---|---|
| 314322 | 2 | 0 | 0 | 0 | 0 |
| 315316 | 1 | 0 | 0 | 0 | 0 |
| 316317 | 1 | 0 | 0 | 0 | 0 |
| 316318 | 1 | 0 | 0 | 0 | 0 |
| 316319 | 1 | 0 | 0 | 0 | 0 |
| 319320 | 1 | 0 | 0 | 0 | 0 |
| 319321 | 1 | 0 | 0 | 0 | 0 |
| 319323 | 1 | 0 | 0 | 0 | 0 |
| 323324 | 1 | 0 | 0 | 0 | 0 |
| 324325 | 1 | 0 | 0 | 0 | 0 |
| 324332 | 2 | 0 | 0 | 0 | 0 |
| 325326 | 1 | 0 | 0 | 0 | 0 |
| 325327 | 2 | 0 | 0 | 0 | 0 |
| 327328 | 1 | 0 | 0 | 0 | 0 |
| 327329 | 1 | 0 | 0 | 0 | 0 |
| 329330 | 2 | 0 | 0 | 0 | 0 |
| 329334 | 1 | 0 | 0 | 0 | 0 |
| 330331 | 1 | 0 | 0 | 0 | 0 |
| 330332 | 1 | 0 | 0 | 0 | 0 |
| 332333 | 1 | 0 | 0 | 0 | 0 |
| 334335 | 1 | 0 | 0 | 0 | 0 |
| 334336 | 1 | 0 | 0 | 0 | 0 |
| 334340 | 1 | 0 | 0 | 0 | 0 |
| 335344 | 1 | 0 | 0 | 0 | 0 |
| 335351 | 2 | 0 | 0 | 0 | 0 |
| 336337 | 1 | 0 | 0 | 0 | 0 |
| 336338 | 1 | 0 | 0 | 0 | 0 |
| 336339 | 1 | 0 | 0 | 0 | 0 |
| 340341 | 1 | 0 | 0 | 0 | 0 |
| 340342 | 1 | 0 | 0 | 0 | 0 |
| 340343 | 1 | 0 | 0 | 0 | 0 |
| 344345 | 1 | 0 | 0 | 0 | 0 |
| 344346 | 2 | 0 | 0 | 0 | 0 |
| 346347 | 1 | 0 | 0 | 0 | 0 |
| 346348 | 1 | 0 | 0 | 0 | 0 |
| 348349 | 2 | 0 | 0 | 0 | 0 |
| 348353 | 1 | 0 | 0 | 0 | 0 |
| 349350 | 1 | 0 | 0 | 0 | 0 |
| 349351 | 1 | 0 | 0 | 0 | 0 |
| 351352 | 1 | 0 | 0 | 0 | 0 |
| 354355 | 1 | 0 | 0 | 0 | 0 |
| 354356 | 1 | 0 | 0 | 0 | 0 |
| 354357 | 1 | 0 | 0 | 0 | 0 |
| 354371 | 1 | 0 | 0 | 0 | 0 |
| 357358 | 1 | 0 | 0 | 0 | 0 |
| 357367 | 1 | 0 | 0 | 0 | 0 |
| 358359 | 1 | 0 | 0 | 0 | 0 |
| 358360 | 1 | 0 | 0 | 0 | 0 |
| 358361 | 1 | 0 | 0 | 0 | 0 |
| 361362 | 1 | 0 | 0 | 0 | 0 |
| 361363 | 1 | 0 | 0 | 0 | 0 |
| 361364 | 1 | 0 | 0 | 0 | 0 |
| 364365 | 1 | 0 | 0 | 0 | 0 |
| 364366 | 1 | 0 | 0 | 0 | 0 |
| 364370 | 1 | 0 | 0 | 0 | 0 |
| 367368 | 1 | 0 | 0 | 0 | 0 |
| 367369 | 1 | 0 | 0 | 0 | 0 |
| 367376 | 1 | 0 | 0 | 0 | 0 |
| 370396 | 1 | 0 | 0 | 0 | 0 |
| 371372 | 1 | 0 | 0 | 0 | 0 |
| 371373 | 1 | 0 | 0 | 0 | 0 |
| 371374 | 1 | 0 | 0 | 0 | 0 |
| 374375 | 1 | 0 | 0 | 0 | 0 |
| 376377 | 1 | 0 | 0 | 0 | 0 |
| 376378 | 1 | 0 | 0 | 0 | 0 |
| 376379 | 1 | 0 | 0 | 0 | 0 |
| 379380 | 1 | 0 | 0 | 0 | 0 |
| 381382 | 1 | 0 | 0 | 0 | 0 |
| 381383 | 1 | 0 | 0 | 0 | 0 |
| 381384 | 1 | 0 | 0 | 0 | 0 |
| 381393 | 1 | 0 | 0 | 0 | 0 |
| 384385 | 1 | 0 | 0 | 0 | 0 |
| 385386 | 1 | 0 | 0 | 0 | 0 |
| 385392 | 2 | 0 | 0 | 0 | 0 |
| 386387 | 1 | 0 | 0 | 0 | 0 |
| 386388 | 1 | 0 | 0 | 0 | 0 |
| 386389 | 1 | 0 | 0 | 0 | 0 |
| 389390 | 1 | 0 | 0 | 0 | 0 |
| 389391 | 1 | 0 | 0 | 0 | 0 |
| 389458 | 1 | 0 | 0 | 0 | 0 |
| 393394 | 1 | 0 | 0 | 0 | 0 |

|        |   |   |   |   |   |
|--------|---|---|---|---|---|
| 393395 | 1 | 0 | 0 | 0 | 0 |
| 393441 | 1 | 0 | 0 | 0 | 0 |
| 396397 | 1 | 0 | 0 | 0 | 0 |
| 396398 | 1 | 0 | 0 | 0 | 0 |
| 396399 | 1 | 0 | 0 | 0 | 0 |
| 399400 | 1 | 0 | 0 | 0 | 0 |
| 399401 | 1 | 0 | 0 | 0 | 0 |
| 399402 | 1 | 0 | 0 | 0 | 0 |
| 402403 | 1 | 0 | 0 | 0 | 0 |
| 402410 | 2 | 0 | 0 | 0 | 0 |
| 403404 | 1 | 0 | 0 | 0 | 0 |
| 404405 | 1 | 0 | 0 | 0 | 0 |
| 404406 | 1 | 0 | 0 | 0 | 0 |
| 404407 | 1 | 0 | 0 | 0 | 0 |
| 407408 | 1 | 0 | 0 | 0 | 0 |
| 407409 | 1 | 0 | 0 | 0 | 0 |
| 407411 | 1 | 0 | 0 | 0 | 0 |
| 411412 | 1 | 0 | 0 | 0 | 0 |
| 412413 | 1 | 0 | 0 | 0 | 0 |
| 412420 | 2 | 0 | 0 | 0 | 0 |
| 413414 | 1 | 0 | 0 | 0 | 0 |
| 413415 | 2 | 0 | 0 | 0 | 0 |
| 415416 | 1 | 0 | 0 | 0 | 0 |
| 415417 | 1 | 0 | 0 | 0 | 0 |
| 417418 | 2 | 0 | 0 | 0 | 0 |
| 417422 | 1 | 0 | 0 | 0 | 0 |
| 418419 | 1 | 0 | 0 | 0 | 0 |
| 418420 | 1 | 0 | 0 | 0 | 0 |
| 420421 | 1 | 0 | 0 | 0 | 0 |
| 422423 | 1 | 0 | 0 | 0 | 0 |
| 422424 | 1 | 0 | 0 | 0 | 0 |
| 422428 | 1 | 0 | 0 | 0 | 0 |
| 423432 | 1 | 0 | 0 | 0 | 0 |
| 423439 | 2 | 0 | 0 | 0 | 0 |
| 424425 | 1 | 0 | 0 | 0 | 0 |
| 424426 | 1 | 0 | 0 | 0 | 0 |
| 424427 | 1 | 0 | 0 | 0 | 0 |
| 428429 | 1 | 0 | 0 | 0 | 0 |
| 428430 | 1 | 0 | 0 | 0 | 0 |
| 428431 | 1 | 0 | 0 | 0 | 0 |
| 432433 | 1 | 0 | 0 | 0 | 0 |
| 432434 | 2 | 0 | 0 | 0 | 0 |
| 434435 | 1 | 0 | 0 | 0 | 0 |
| 434436 | 1 | 0 | 0 | 0 | 0 |
| 436437 | 2 | 0 | 0 | 0 | 0 |
| 436441 | 1 | 0 | 0 | 0 | 0 |
| 437438 | 1 | 0 | 0 | 0 | 0 |
| 437439 | 1 | 0 | 0 | 0 | 0 |
| 439440 | 1 | 0 | 0 | 0 | 0 |
| 442443 | 1 | 0 | 0 | 0 | 0 |
| 442444 | 1 | 0 | 0 | 0 | 0 |
| 442445 | 1 | 0 | 0 | 0 | 0 |
| 442460 | 1 | 0 | 0 | 0 | 0 |
| 445446 | 1 | 0 | 0 | 0 | 0 |
| 445455 | 1 | 0 | 0 | 0 | 0 |
| 446447 | 1 | 0 | 0 | 0 | 0 |
| 446448 | 1 | 0 | 0 | 0 | 0 |
| 446449 | 1 | 0 | 0 | 0 | 0 |
| 449450 | 1 | 0 | 0 | 0 | 0 |
| 449451 | 1 | 0 | 0 | 0 | 0 |
| 449452 | 1 | 0 | 0 | 0 | 0 |
| 452453 | 1 | 0 | 0 | 0 | 0 |
| 452454 | 1 | 0 | 0 | 0 | 0 |
| 452458 | 1 | 0 | 0 | 0 | 0 |
| 455456 | 1 | 0 | 0 | 0 | 0 |
| 455457 | 1 | 0 | 0 | 0 | 0 |
| 455465 | 1 | 0 | 0 | 0 | 0 |
| 458459 | 1 | 0 | 0 | 0 | 0 |
| 460461 | 1 | 0 | 0 | 0 | 0 |
| 460462 | 1 | 0 | 0 | 0 | 0 |
| 460463 | 1 | 0 | 0 | 0 | 0 |
| 463464 | 1 | 0 | 0 | 0 | 0 |
| 465466 | 1 | 0 | 0 | 0 | 0 |
| 465467 | 1 | 0 | 0 | 0 | 0 |
| 465468 | 1 | 0 | 0 | 0 | 0 |
| 468469 | 1 | 0 | 0 | 0 | 0 |

M END  
> <NAME>  
D87\_12

\$\$\$\$













|         |         |         |   |   |   |   |   |   |   |   |   |   |   |   |   |
|---------|---------|---------|---|---|---|---|---|---|---|---|---|---|---|---|---|
| 33.8870 | 19.6600 | 1.5950  | N | 0 | 0 | 0 | 0 | 0 | 0 | 0 | 0 | 0 | 0 | 0 | 0 |
| 35.1590 | 19.7250 | 1.2720  | C | 0 | 0 | 0 | 0 | 0 | 0 | 0 | 0 | 0 | 0 | 0 | 0 |
| 35.7090 | 18.9800 | 0.7120  | H | 0 | 0 | 0 | 0 | 0 | 0 | 0 | 0 | 0 | 0 | 0 | 0 |
| 37.1190 | 21.2600 | 1.5580  | C | 0 | 0 | 0 | 0 | 0 | 0 | 0 | 0 | 0 | 0 | 0 | 0 |
| 37.3970 | 21.8970 | 2.4060  | H | 0 | 0 | 0 | 0 | 0 | 0 | 0 | 0 | 0 | 0 | 0 | 0 |
| 37.7120 | 20.3410 | 1.6240  | H | 0 | 0 | 0 | 0 | 0 | 0 | 0 | 0 | 0 | 0 | 0 | 0 |
| 37.3450 | 21.9880 | 0.2340  | C | 0 | 0 | 0 | 0 | 0 | 0 | 0 | 0 | 0 | 0 | 0 | 0 |
| 37.0090 | 21.3600 | -0.6020 | H | 0 | 0 | 0 | 0 | 0 | 0 | 0 | 0 | 0 | 0 | 0 | 0 |
| 36.7190 | 22.8890 | 0.2070  | H | 0 | 0 | 0 | 0 | 0 | 0 | 0 | 0 | 0 | 0 | 0 | 0 |
| 38.8010 | 22.4020 | -0.0110 | C | 0 | 0 | 0 | 0 | 0 | 0 | 0 | 0 | 0 | 0 | 0 | 0 |
| 38.8390 | 23.0060 | -0.9040 | H | 0 | 0 | 0 | 0 | 0 | 0 | 0 | 0 | 0 | 0 | 0 | 0 |
| 39.1430 | 23.0330 | -0.8400 | H | 0 | 0 | 0 | 0 | 0 | 0 | 0 | 0 | 0 | 0 | 0 | 0 |
| 39.6700 | 21.2330 | -0.1310 | N | 0 | 0 | 3 | 0 | 0 | 0 | 0 | 0 | 0 | 0 | 0 | 0 |
| 39.7340 | 20.7330 | 0.7550  | H | 0 | 0 | 0 | 0 | 0 | 0 | 0 | 0 | 0 | 0 | 0 | 0 |
| 1       | 2       | 1       | 0 | 0 | 0 | 0 |   |   |   |   |   |   |   |   |   |
| 1       | 7       | 1       | 0 | 0 | 0 | 0 |   |   |   |   |   |   |   |   |   |
| 1       | 9       | 1       | 0 | 0 | 0 | 0 |   |   |   |   |   |   |   |   |   |
| 2       | 3       | 1       | 0 | 0 | 0 | 0 |   |   |   |   |   |   |   |   |   |
| 2       | 4       | 2       | 0 | 0 | 0 | 0 |   |   |   |   |   |   |   |   |   |
| 4       | 5       | 1       | 0 | 0 | 0 | 0 |   |   |   |   |   |   |   |   |   |
| 4       | 6       | 1       | 0 | 0 | 0 | 0 |   |   |   |   |   |   |   |   |   |
| 6       | 7       | 2       | 0 | 0 | 0 | 0 |   |   |   |   |   |   |   |   |   |
| 7       | 8       | 1       | 0 | 0 | 0 | 0 |   |   |   |   |   |   |   |   |   |
| 9       | 10      | 1       | 0 | 0 | 0 | 0 |   |   |   |   |   |   |   |   |   |
| 9       | 11      | 1       | 0 | 0 | 0 | 0 |   |   |   |   |   |   |   |   |   |
| 9       | 12      | 1       | 0 | 0 | 0 | 0 |   |   |   |   |   |   |   |   |   |
| 12      | 13      | 1       | 0 | 0 | 0 | 0 |   |   |   |   |   |   |   |   |   |
| 12      | 14      | 1       | 0 | 0 | 0 | 0 |   |   |   |   |   |   |   |   |   |
| 12      | 15      | 1       | 0 | 0 | 0 | 0 |   |   |   |   |   |   |   |   |   |
| 15      | 16      | 1       | 0 | 0 | 0 | 0 |   |   |   |   |   |   |   |   |   |
| 15      | 17      | 1       | 0 | 0 | 0 | 0 |   |   |   |   |   |   |   |   |   |
| 15      | 18      | 1       | 0 | 0 | 0 | 0 |   |   |   |   |   |   |   |   |   |
| 18      | 19      | 1       | 0 | 0 | 0 | 0 |   |   |   |   |   |   |   |   |   |
| 18      | 35      | 1       | 0 | 0 | 0 | 0 |   |   |   |   |   |   |   |   |   |
| 20      | 21      | 1       | 0 | 0 | 0 | 0 |   |   |   |   |   |   |   |   |   |
| 20      | 22      | 1       | 0 | 0 | 0 | 0 |   |   |   |   |   |   |   |   |   |
| 20      | 23      | 1       | 0 | 0 | 0 | 0 |   |   |   |   |   |   |   |   |   |
| 20      | 32      | 1       | 0 | 0 | 0 | 0 |   |   |   |   |   |   |   |   |   |
| 23      | 24      | 1       | 0 | 0 | 0 | 0 |   |   |   |   |   |   |   |   |   |
| 24      | 25      | 1       | 0 | 0 | 0 | 0 |   |   |   |   |   |   |   |   |   |
| 24      | 31      | 2       | 0 | 0 | 0 | 0 |   |   |   |   |   |   |   |   |   |
| 25      | 26      | 1       | 0 | 0 | 0 | 0 |   |   |   |   |   |   |   |   |   |
| 25      | 27      | 1       | 0 | 0 | 0 | 0 |   |   |   |   |   |   |   |   |   |
| 25      | 28      | 1       | 0 | 0 | 0 | 0 |   |   |   |   |   |   |   |   |   |
| 28      | 29      | 1       | 0 | 0 | 0 | 0 |   |   |   |   |   |   |   |   |   |
| 28      | 30      | 1       | 0 | 0 | 0 | 0 |   |   |   |   |   |   |   |   |   |
| 28      | 98      | 1       | 0 | 0 | 0 | 0 |   |   |   |   |   |   |   |   |   |
| 32      | 33      | 1       | 0 | 0 | 0 | 0 |   |   |   |   |   |   |   |   |   |
| 32      | 34      | 1       | 0 | 0 | 0 | 0 |   |   |   |   |   |   |   |   |   |
| 32      | 80      | 1       | 0 | 0 | 0 | 0 |   |   |   |   |   |   |   |   |   |
| 35      | 36      | 1       | 0 | 0 | 0 | 0 |   |   |   |   |   |   |   |   |   |
| 35      | 37      | 1       | 0 | 0 | 0 | 0 |   |   |   |   |   |   |   |   |   |
| 35      | 38      | 1       | 0 | 0 | 0 | 0 |   |   |   |   |   |   |   |   |   |
| 38      | 39      | 1       | 0 | 0 | 0 | 0 |   |   |   |   |   |   |   |   |   |
| 38      | 40      | 1       | 0 | 0 | 0 | 0 |   |   |   |   |   |   |   |   |   |
| 38      | 41      | 1       | 0 | 0 | 0 | 0 |   |   |   |   |   |   |   |   |   |
| 41      | 42      | 1       | 0 | 0 | 0 | 0 |   |   |   |   |   |   |   |   |   |
| 41      | 49      | 2       | 0 | 0 | 0 | 0 |   |   |   |   |   |   |   |   |   |
| 42      | 43      | 1       | 0 | 0 | 0 | 0 |   |   |   |   |   |   |   |   |   |
| 43      | 44      | 1       | 0 | 0 | 0 | 0 |   |   |   |   |   |   |   |   |   |
| 43      | 45      | 1       | 0 | 0 | 0 | 0 |   |   |   |   |   |   |   |   |   |
| 43      | 46      | 1       | 0 | 0 | 0 | 0 |   |   |   |   |   |   |   |   |   |
| 46      | 47      | 1       | 0 | 0 | 0 | 0 |   |   |   |   |   |   |   |   |   |
| 46      | 48      | 1       | 0 | 0 | 0 | 0 |   |   |   |   |   |   |   |   |   |
| 46      | 50      | 1       | 0 | 0 | 0 | 0 |   |   |   |   |   |   |   |   |   |
| 50      | 51      | 1       | 0 | 0 | 0 | 0 |   |   |   |   |   |   |   |   |   |
| 51      | 52      | 1       | 0 | 0 | 0 | 0 |   |   |   |   |   |   |   |   |   |
| 51      | 59      | 2       | 0 | 0 | 0 | 0 |   |   |   |   |   |   |   |   |   |
| 52      | 53      | 1       | 0 | 0 | 0 | 0 |   |   |   |   |   |   |   |   |   |
| 52      | 54      | 2       | 0 | 0 | 0 | 0 |   |   |   |   |   |   |   |   |   |
| 54      | 55      | 1       | 0 | 0 | 0 | 0 |   |   |   |   |   |   |   |   |   |
| 54      | 56      | 1       | 0 | 0 | 0 | 0 |   |   |   |   |   |   |   |   |   |
| 56      | 57      | 2       | 0 | 0 | 0 | 0 |   |   |   |   |   |   |   |   |   |
| 56      | 61      | 1       | 0 | 0 | 0 | 0 |   |   |   |   |   |   |   |   |   |
| 57      | 58      | 1       | 0 | 0 | 0 | 0 |   |   |   |   |   |   |   |   |   |
| 57      | 59      | 1       | 0 | 0 | 0 | 0 |   |   |   |   |   |   |   |   |   |
| 59      | 60      | 1       | 0 | 0 | 0 | 0 |   |   |   |   |   |   |   |   |   |
| 61      | 62      | 1       | 0 | 0 | 0 | 0 |   |   |   |   |   |   |   |   |   |
| 61      | 63      | 1       | 0 | 0 | 0 | 0 |   |   |   |   |   |   |   |   |   |
| 61      | 67      | 1       | 0 | 0 | 0 | 0 |   |   |   |   |   |   |   |   |   |
| 62      | 71      | 1       | 0 | 0 | 0 | 0 |   |   |   |   |   |   |   |   |   |

|     |     |   |   |   |   |   |
|-----|-----|---|---|---|---|---|
| 62  | 78  | 2 | 0 | 0 | 0 | 0 |
| 63  | 64  | 1 | 0 | 0 | 0 | 0 |
| 63  | 65  | 1 | 0 | 0 | 0 | 0 |
| 63  | 66  | 1 | 0 | 0 | 0 | 0 |
| 67  | 68  | 1 | 0 | 0 | 0 | 0 |
| 67  | 69  | 1 | 0 | 0 | 0 | 0 |
| 67  | 70  | 1 | 0 | 0 | 0 | 0 |
| 71  | 72  | 1 | 0 | 0 | 0 | 0 |
| 71  | 73  | 2 | 0 | 0 | 0 | 0 |
| 73  | 74  | 1 | 0 | 0 | 0 | 0 |
| 73  | 75  | 1 | 0 | 0 | 0 | 0 |
| 75  | 76  | 2 | 0 | 0 | 0 | 0 |
| 75  | 80  | 1 | 0 | 0 | 0 | 0 |
| 76  | 77  | 1 | 0 | 0 | 0 | 0 |
| 76  | 78  | 1 | 0 | 0 | 0 | 0 |
| 78  | 79  | 1 | 0 | 0 | 0 | 0 |
| 81  | 82  | 1 | 0 | 0 | 0 | 0 |
| 81  | 87  | 1 | 0 | 0 | 0 | 0 |
| 81  | 89  | 1 | 0 | 0 | 0 | 0 |
| 82  | 83  | 1 | 0 | 0 | 0 | 0 |
| 82  | 84  | 2 | 0 | 0 | 0 | 0 |
| 84  | 85  | 1 | 0 | 0 | 0 | 0 |
| 84  | 86  | 1 | 0 | 0 | 0 | 0 |
| 86  | 87  | 2 | 0 | 0 | 0 | 0 |
| 87  | 88  | 1 | 0 | 0 | 0 | 0 |
| 89  | 90  | 1 | 0 | 0 | 0 | 0 |
| 89  | 91  | 1 | 0 | 0 | 0 | 0 |
| 89  | 92  | 1 | 0 | 0 | 0 | 0 |
| 92  | 93  | 1 | 0 | 0 | 0 | 0 |
| 92  | 94  | 1 | 0 | 0 | 0 | 0 |
| 92  | 95  | 1 | 0 | 0 | 0 | 0 |
| 95  | 96  | 1 | 0 | 0 | 0 | 0 |
| 95  | 97  | 1 | 0 | 0 | 0 | 0 |
| 95  | 98  | 1 | 0 | 0 | 0 | 0 |
| 98  | 114 | 1 | 0 | 0 | 0 | 0 |
| 99  | 100 | 1 | 0 | 0 | 0 | 0 |
| 99  | 101 | 1 | 0 | 0 | 0 | 0 |
| 99  | 102 | 1 | 0 | 0 | 0 | 0 |
| 99  | 111 | 1 | 0 | 0 | 0 | 0 |
| 102 | 103 | 1 | 0 | 0 | 0 | 0 |
| 103 | 104 | 1 | 0 | 0 | 0 | 0 |
| 103 | 110 | 2 | 0 | 0 | 0 | 0 |
| 104 | 105 | 1 | 0 | 0 | 0 | 0 |
| 104 | 106 | 1 | 0 | 0 | 0 | 0 |
| 104 | 107 | 1 | 0 | 0 | 0 | 0 |
| 107 | 108 | 1 | 0 | 0 | 0 | 0 |
| 107 | 109 | 1 | 0 | 0 | 0 | 0 |
| 107 | 177 | 1 | 0 | 0 | 0 | 0 |
| 111 | 112 | 1 | 0 | 0 | 0 | 0 |
| 111 | 113 | 1 | 0 | 0 | 0 | 0 |
| 111 | 159 | 1 | 0 | 0 | 0 | 0 |
| 114 | 115 | 1 | 0 | 0 | 0 | 0 |
| 114 | 116 | 1 | 0 | 0 | 0 | 0 |
| 114 | 117 | 1 | 0 | 0 | 0 | 0 |
| 117 | 118 | 1 | 0 | 0 | 0 | 0 |
| 117 | 119 | 1 | 0 | 0 | 0 | 0 |
| 117 | 120 | 1 | 0 | 0 | 0 | 0 |
| 120 | 121 | 1 | 0 | 0 | 0 | 0 |
| 120 | 128 | 2 | 0 | 0 | 0 | 0 |
| 121 | 122 | 1 | 0 | 0 | 0 | 0 |
| 122 | 123 | 1 | 0 | 0 | 0 | 0 |
| 122 | 124 | 1 | 0 | 0 | 0 | 0 |
| 122 | 125 | 1 | 0 | 0 | 0 | 0 |
| 125 | 126 | 1 | 0 | 0 | 0 | 0 |
| 125 | 127 | 1 | 0 | 0 | 0 | 0 |
| 125 | 129 | 1 | 0 | 0 | 0 | 0 |
| 129 | 130 | 1 | 0 | 0 | 0 | 0 |
| 130 | 131 | 1 | 0 | 0 | 0 | 0 |
| 130 | 138 | 2 | 0 | 0 | 0 | 0 |
| 131 | 132 | 1 | 0 | 0 | 0 | 0 |
| 131 | 133 | 2 | 0 | 0 | 0 | 0 |
| 133 | 134 | 1 | 0 | 0 | 0 | 0 |
| 133 | 135 | 1 | 0 | 0 | 0 | 0 |
| 135 | 136 | 2 | 0 | 0 | 0 | 0 |
| 135 | 140 | 1 | 0 | 0 | 0 | 0 |
| 136 | 137 | 1 | 0 | 0 | 0 | 0 |
| 136 | 138 | 1 | 0 | 0 | 0 | 0 |
| 138 | 139 | 1 | 0 | 0 | 0 | 0 |
| 140 | 141 | 1 | 0 | 0 | 0 | 0 |
| 140 | 142 | 1 | 0 | 0 | 0 | 0 |
| 140 | 146 | 1 | 0 | 0 | 0 | 0 |

|        |   |   |   |   |   |
|--------|---|---|---|---|---|
| 141150 | 1 | 0 | 0 | 0 | 0 |
| 141157 | 2 | 0 | 0 | 0 | 0 |
| 142143 | 1 | 0 | 0 | 0 | 0 |
| 142144 | 1 | 0 | 0 | 0 | 0 |
| 142145 | 1 | 0 | 0 | 0 | 0 |
| 146147 | 1 | 0 | 0 | 0 | 0 |
| 146148 | 1 | 0 | 0 | 0 | 0 |
| 146149 | 1 | 0 | 0 | 0 | 0 |
| 150151 | 1 | 0 | 0 | 0 | 0 |
| 150152 | 2 | 0 | 0 | 0 | 0 |
| 152153 | 1 | 0 | 0 | 0 | 0 |
| 152154 | 1 | 0 | 0 | 0 | 0 |
| 154155 | 2 | 0 | 0 | 0 | 0 |
| 154159 | 1 | 0 | 0 | 0 | 0 |
| 155156 | 1 | 0 | 0 | 0 | 0 |
| 155157 | 1 | 0 | 0 | 0 | 0 |
| 157158 | 1 | 0 | 0 | 0 | 0 |
| 160161 | 1 | 0 | 0 | 0 | 0 |
| 160166 | 1 | 0 | 0 | 0 | 0 |
| 160168 | 1 | 0 | 0 | 0 | 0 |
| 161162 | 1 | 0 | 0 | 0 | 0 |
| 161163 | 2 | 0 | 0 | 0 | 0 |
| 163164 | 1 | 0 | 0 | 0 | 0 |
| 163165 | 1 | 0 | 0 | 0 | 0 |
| 165166 | 2 | 0 | 0 | 0 | 0 |
| 166167 | 1 | 0 | 0 | 0 | 0 |
| 168169 | 1 | 0 | 0 | 0 | 0 |
| 168170 | 1 | 0 | 0 | 0 | 0 |
| 168171 | 1 | 0 | 0 | 0 | 0 |
| 171172 | 1 | 0 | 0 | 0 | 0 |
| 171173 | 1 | 0 | 0 | 0 | 0 |
| 171174 | 1 | 0 | 0 | 0 | 0 |
| 174175 | 1 | 0 | 0 | 0 | 0 |
| 174176 | 1 | 0 | 0 | 0 | 0 |
| 174177 | 1 | 0 | 0 | 0 | 0 |
| 177193 | 1 | 0 | 0 | 0 | 0 |
| 178179 | 1 | 0 | 0 | 0 | 0 |
| 178180 | 1 | 0 | 0 | 0 | 0 |
| 178181 | 1 | 0 | 0 | 0 | 0 |
| 178190 | 1 | 0 | 0 | 0 | 0 |
| 181182 | 1 | 0 | 0 | 0 | 0 |
| 182183 | 1 | 0 | 0 | 0 | 0 |
| 182189 | 2 | 0 | 0 | 0 | 0 |
| 183184 | 1 | 0 | 0 | 0 | 0 |
| 183185 | 1 | 0 | 0 | 0 | 0 |
| 183186 | 1 | 0 | 0 | 0 | 0 |
| 186187 | 1 | 0 | 0 | 0 | 0 |
| 186188 | 1 | 0 | 0 | 0 | 0 |
| 186256 | 1 | 0 | 0 | 0 | 0 |
| 190191 | 1 | 0 | 0 | 0 | 0 |
| 190192 | 1 | 0 | 0 | 0 | 0 |
| 190238 | 1 | 0 | 0 | 0 | 0 |
| 193194 | 1 | 0 | 0 | 0 | 0 |
| 193195 | 1 | 0 | 0 | 0 | 0 |
| 193196 | 1 | 0 | 0 | 0 | 0 |
| 196197 | 1 | 0 | 0 | 0 | 0 |
| 196198 | 1 | 0 | 0 | 0 | 0 |
| 196199 | 1 | 0 | 0 | 0 | 0 |
| 199200 | 1 | 0 | 0 | 0 | 0 |
| 199207 | 2 | 0 | 0 | 0 | 0 |
| 200201 | 1 | 0 | 0 | 0 | 0 |
| 201202 | 1 | 0 | 0 | 0 | 0 |
| 201203 | 1 | 0 | 0 | 0 | 0 |
| 201204 | 1 | 0 | 0 | 0 | 0 |
| 204205 | 1 | 0 | 0 | 0 | 0 |
| 204206 | 1 | 0 | 0 | 0 | 0 |
| 204208 | 1 | 0 | 0 | 0 | 0 |
| 208209 | 1 | 0 | 0 | 0 | 0 |
| 209210 | 1 | 0 | 0 | 0 | 0 |
| 209217 | 2 | 0 | 0 | 0 | 0 |
| 210211 | 1 | 0 | 0 | 0 | 0 |
| 210212 | 2 | 0 | 0 | 0 | 0 |
| 212213 | 1 | 0 | 0 | 0 | 0 |
| 212214 | 1 | 0 | 0 | 0 | 0 |
| 214215 | 2 | 0 | 0 | 0 | 0 |
| 214219 | 1 | 0 | 0 | 0 | 0 |
| 215216 | 1 | 0 | 0 | 0 | 0 |
| 215217 | 1 | 0 | 0 | 0 | 0 |
| 217218 | 1 | 0 | 0 | 0 | 0 |
| 219220 | 1 | 0 | 0 | 0 | 0 |
| 219221 | 1 | 0 | 0 | 0 | 0 |

|        |   |   |   |   |   |
|--------|---|---|---|---|---|
| 219225 | 1 | 0 | 0 | 0 | 0 |
| 220229 | 1 | 0 | 0 | 0 | 0 |
| 220236 | 2 | 0 | 0 | 0 | 0 |
| 221222 | 1 | 0 | 0 | 0 | 0 |
| 221223 | 1 | 0 | 0 | 0 | 0 |
| 221224 | 1 | 0 | 0 | 0 | 0 |
| 225226 | 1 | 0 | 0 | 0 | 0 |
| 225227 | 1 | 0 | 0 | 0 | 0 |
| 225228 | 1 | 0 | 0 | 0 | 0 |
| 229230 | 1 | 0 | 0 | 0 | 0 |
| 229231 | 2 | 0 | 0 | 0 | 0 |
| 231232 | 1 | 0 | 0 | 0 | 0 |
| 231233 | 1 | 0 | 0 | 0 | 0 |
| 233234 | 2 | 0 | 0 | 0 | 0 |
| 233238 | 1 | 0 | 0 | 0 | 0 |
| 234235 | 1 | 0 | 0 | 0 | 0 |
| 234236 | 1 | 0 | 0 | 0 | 0 |
| 236237 | 1 | 0 | 0 | 0 | 0 |
| 239240 | 1 | 0 | 0 | 0 | 0 |
| 239245 | 1 | 0 | 0 | 0 | 0 |
| 239247 | 1 | 0 | 0 | 0 | 0 |
| 240241 | 1 | 0 | 0 | 0 | 0 |
| 240242 | 2 | 0 | 0 | 0 | 0 |
| 242243 | 1 | 0 | 0 | 0 | 0 |
| 242244 | 1 | 0 | 0 | 0 | 0 |
| 244245 | 2 | 0 | 0 | 0 | 0 |
| 245246 | 1 | 0 | 0 | 0 | 0 |
| 247248 | 1 | 0 | 0 | 0 | 0 |
| 247249 | 1 | 0 | 0 | 0 | 0 |
| 247250 | 1 | 0 | 0 | 0 | 0 |
| 250251 | 1 | 0 | 0 | 0 | 0 |
| 250252 | 1 | 0 | 0 | 0 | 0 |
| 250253 | 1 | 0 | 0 | 0 | 0 |
| 253254 | 1 | 0 | 0 | 0 | 0 |
| 253255 | 1 | 0 | 0 | 0 | 0 |
| 253256 | 1 | 0 | 0 | 0 | 0 |
| 256272 | 1 | 0 | 0 | 0 | 0 |
| 257258 | 1 | 0 | 0 | 0 | 0 |
| 257259 | 1 | 0 | 0 | 0 | 0 |
| 257260 | 1 | 0 | 0 | 0 | 0 |
| 257269 | 1 | 0 | 0 | 0 | 0 |
| 260261 | 1 | 0 | 0 | 0 | 0 |
| 261262 | 1 | 0 | 0 | 0 | 0 |
| 261268 | 2 | 0 | 0 | 0 | 0 |
| 262263 | 1 | 0 | 0 | 0 | 0 |
| 262264 | 1 | 0 | 0 | 0 | 0 |
| 262265 | 1 | 0 | 0 | 0 | 0 |
| 265266 | 1 | 0 | 0 | 0 | 0 |
| 265267 | 1 | 0 | 0 | 0 | 0 |
| 265335 | 1 | 0 | 0 | 0 | 0 |
| 269270 | 1 | 0 | 0 | 0 | 0 |
| 269271 | 1 | 0 | 0 | 0 | 0 |
| 269317 | 1 | 0 | 0 | 0 | 0 |
| 272273 | 1 | 0 | 0 | 0 | 0 |
| 272274 | 1 | 0 | 0 | 0 | 0 |
| 272275 | 1 | 0 | 0 | 0 | 0 |
| 275276 | 1 | 0 | 0 | 0 | 0 |
| 275277 | 1 | 0 | 0 | 0 | 0 |
| 275278 | 1 | 0 | 0 | 0 | 0 |
| 278279 | 1 | 0 | 0 | 0 | 0 |
| 278286 | 2 | 0 | 0 | 0 | 0 |
| 279280 | 1 | 0 | 0 | 0 | 0 |
| 280281 | 1 | 0 | 0 | 0 | 0 |
| 280282 | 1 | 0 | 0 | 0 | 0 |
| 280283 | 1 | 0 | 0 | 0 | 0 |
| 283284 | 1 | 0 | 0 | 0 | 0 |
| 283285 | 1 | 0 | 0 | 0 | 0 |
| 283287 | 1 | 0 | 0 | 0 | 0 |
| 287288 | 1 | 0 | 0 | 0 | 0 |
| 288289 | 1 | 0 | 0 | 0 | 0 |
| 288296 | 2 | 0 | 0 | 0 | 0 |
| 289290 | 1 | 0 | 0 | 0 | 0 |
| 289291 | 2 | 0 | 0 | 0 | 0 |
| 291292 | 1 | 0 | 0 | 0 | 0 |
| 291293 | 1 | 0 | 0 | 0 | 0 |
| 293294 | 2 | 0 | 0 | 0 | 0 |
| 293298 | 1 | 0 | 0 | 0 | 0 |
| 294295 | 1 | 0 | 0 | 0 | 0 |
| 294296 | 1 | 0 | 0 | 0 | 0 |
| 296297 | 1 | 0 | 0 | 0 | 0 |
| 298299 | 1 | 0 | 0 | 0 | 0 |

|        |   |   |   |   |   |
|--------|---|---|---|---|---|
| 298300 | 1 | 0 | 0 | 0 | 0 |
| 298304 | 1 | 0 | 0 | 0 | 0 |
| 299308 | 1 | 0 | 0 | 0 | 0 |
| 299315 | 2 | 0 | 0 | 0 | 0 |
| 300301 | 1 | 0 | 0 | 0 | 0 |
| 300302 | 1 | 0 | 0 | 0 | 0 |
| 300303 | 1 | 0 | 0 | 0 | 0 |
| 304305 | 1 | 0 | 0 | 0 | 0 |
| 304306 | 1 | 0 | 0 | 0 | 0 |
| 304307 | 1 | 0 | 0 | 0 | 0 |
| 308309 | 1 | 0 | 0 | 0 | 0 |
| 308310 | 2 | 0 | 0 | 0 | 0 |
| 310311 | 1 | 0 | 0 | 0 | 0 |
| 310312 | 1 | 0 | 0 | 0 | 0 |
| 312313 | 2 | 0 | 0 | 0 | 0 |
| 312317 | 1 | 0 | 0 | 0 | 0 |
| 313314 | 1 | 0 | 0 | 0 | 0 |
| 313315 | 1 | 0 | 0 | 0 | 0 |
| 315316 | 1 | 0 | 0 | 0 | 0 |
| 318319 | 1 | 0 | 0 | 0 | 0 |
| 318324 | 1 | 0 | 0 | 0 | 0 |
| 318326 | 1 | 0 | 0 | 0 | 0 |
| 319320 | 1 | 0 | 0 | 0 | 0 |
| 319321 | 2 | 0 | 0 | 0 | 0 |
| 321322 | 1 | 0 | 0 | 0 | 0 |
| 321323 | 1 | 0 | 0 | 0 | 0 |
| 323324 | 2 | 0 | 0 | 0 | 0 |
| 324325 | 1 | 0 | 0 | 0 | 0 |
| 326327 | 1 | 0 | 0 | 0 | 0 |
| 326328 | 1 | 0 | 0 | 0 | 0 |
| 326329 | 1 | 0 | 0 | 0 | 0 |
| 329330 | 1 | 0 | 0 | 0 | 0 |
| 329331 | 1 | 0 | 0 | 0 | 0 |
| 329332 | 1 | 0 | 0 | 0 | 0 |
| 332333 | 1 | 0 | 0 | 0 | 0 |
| 332334 | 1 | 0 | 0 | 0 | 0 |
| 332335 | 1 | 0 | 0 | 0 | 0 |
| 335351 | 1 | 0 | 0 | 0 | 0 |
| 336337 | 1 | 0 | 0 | 0 | 0 |
| 336338 | 1 | 0 | 0 | 0 | 0 |
| 336339 | 1 | 0 | 0 | 0 | 0 |
| 336348 | 1 | 0 | 0 | 0 | 0 |
| 339340 | 1 | 0 | 0 | 0 | 0 |
| 340341 | 1 | 0 | 0 | 0 | 0 |
| 340347 | 2 | 0 | 0 | 0 | 0 |
| 341342 | 1 | 0 | 0 | 0 | 0 |
| 341343 | 1 | 0 | 0 | 0 | 0 |
| 341344 | 1 | 0 | 0 | 0 | 0 |
| 344345 | 1 | 0 | 0 | 0 | 0 |
| 344346 | 1 | 0 | 0 | 0 | 0 |
| 344414 | 1 | 0 | 0 | 0 | 0 |
| 348349 | 1 | 0 | 0 | 0 | 0 |
| 348350 | 1 | 0 | 0 | 0 | 0 |
| 348396 | 1 | 0 | 0 | 0 | 0 |
| 351352 | 1 | 0 | 0 | 0 | 0 |
| 351353 | 1 | 0 | 0 | 0 | 0 |
| 351354 | 1 | 0 | 0 | 0 | 0 |
| 354355 | 1 | 0 | 0 | 0 | 0 |
| 354356 | 1 | 0 | 0 | 0 | 0 |
| 354357 | 1 | 0 | 0 | 0 | 0 |
| 357358 | 1 | 0 | 0 | 0 | 0 |
| 357365 | 2 | 0 | 0 | 0 | 0 |
| 358359 | 1 | 0 | 0 | 0 | 0 |
| 359360 | 1 | 0 | 0 | 0 | 0 |
| 359361 | 1 | 0 | 0 | 0 | 0 |
| 359362 | 1 | 0 | 0 | 0 | 0 |
| 362363 | 1 | 0 | 0 | 0 | 0 |
| 362364 | 1 | 0 | 0 | 0 | 0 |
| 362366 | 1 | 0 | 0 | 0 | 0 |
| 366367 | 1 | 0 | 0 | 0 | 0 |
| 367368 | 1 | 0 | 0 | 0 | 0 |
| 367375 | 2 | 0 | 0 | 0 | 0 |
| 368369 | 1 | 0 | 0 | 0 | 0 |
| 368370 | 2 | 0 | 0 | 0 | 0 |
| 370371 | 1 | 0 | 0 | 0 | 0 |
| 370372 | 1 | 0 | 0 | 0 | 0 |
| 372373 | 2 | 0 | 0 | 0 | 0 |
| 372377 | 1 | 0 | 0 | 0 | 0 |
| 373374 | 1 | 0 | 0 | 0 | 0 |
| 373375 | 1 | 0 | 0 | 0 | 0 |
| 375376 | 1 | 0 | 0 | 0 | 0 |

377378 1 0 0 0 0  
377379 1 0 0 0 0  
377383 1 0 0 0 0  
378387 1 0 0 0 0  
378394 2 0 0 0 0  
379380 1 0 0 0 0  
379381 1 0 0 0 0  
379382 1 0 0 0 0  
383384 1 0 0 0 0  
383385 1 0 0 0 0  
383386 1 0 0 0 0  
387388 1 0 0 0 0  
387389 2 0 0 0 0  
389390 1 0 0 0 0  
389391 1 0 0 0 0  
391392 2 0 0 0 0  
391396 1 0 0 0 0  
392393 1 0 0 0 0  
392394 1 0 0 0 0  
394395 1 0 0 0 0  
397398 1 0 0 0 0  
397403 1 0 0 0 0  
397405 1 0 0 0 0  
398399 1 0 0 0 0  
398400 2 0 0 0 0  
400401 1 0 0 0 0  
400402 1 0 0 0 0  
402403 2 0 0 0 0  
403404 1 0 0 0 0  
405406 1 0 0 0 0  
405407 1 0 0 0 0  
405408 1 0 0 0 0  
408409 1 0 0 0 0  
408410 1 0 0 0 0  
408411 1 0 0 0 0  
411412 1 0 0 0 0  
411413 1 0 0 0 0  
411414 1 0 0 0 0  
414415 1 0 0 0 0

M END  
> <NAME>  
D93\_12

\$\$\$  
D94\_12  
MOE2012 3D

397412 0 0 1 0 0 0 0 0999 V2000  
60.1240 -6.2000 31.1950 N 0 0 0 0 0 0 0 0 0 0 0 0 0 0 0  
61.2630 -6.9020 30.9200 C 0 0 0 0 0 0 0 0 0 0 0 0 0 0 0  
61.8490 -6.7430 30.0250 H 0 0 0 0 0 0 0 0 0 0 0 0 0 0 0  
61.4120 -7.7580 31.9860 C 0 0 0 0 0 0 0 0 0 0 0 0 0 0 0  
62.1970 -8.4850 32.1470 H 0 0 0 0 0 0 0 0 0 0 0 0 0 0 0  
60.3980 -7.5920 32.8950 N 0 0 0 0 0 0 0 0 0 0 0 0 0 0 0  
59.6390 -6.6450 32.3910 C 0 0 0 0 0 0 0 0 0 0 0 0 0 0 0  
58.7380 -6.2520 32.8450 H 0 0 0 0 0 0 0 0 0 0 0 0 0 0 0  
59.5330 -5.1650 30.3720 C 0 0 0 0 0 0 0 0 0 0 0 0 0 0 0  
59.0810 -4.4290 31.0480 H 0 0 0 0 0 0 0 0 0 0 0 0 0 0 0  
60.3470 -4.6640 29.8330 H 0 0 0 0 0 0 0 0 0 0 0 0 0 0 0  
58.4960 -5.7300 29.3980 C 0 0 0 0 0 0 0 0 0 0 0 0 0 0 0  
58.9830 -6.4550 28.7330 H 0 0 0 0 0 0 0 0 0 0 0 0 0 0 0  
57.7180 -6.2670 29.9550 H 0 0 0 0 0 0 0 0 0 0 0 0 0 0 0  
57.8940 -4.6510 28.6080 N 0 0 3 0 0 0 0 0 0 0 0 0 0 0 0  
57.4190 -3.9940 29.2290 H 0 0 0 0 0 0 0 0 0 0 0 0 0 0 0  
49.0200 -10.1020 13.8930 C 0 0 0 0 0 0 0 0 0 0 0 0 0 0 0  
48.8050 -9.1230 14.3340 H 0 0 0 0 0 0 0 0 0 0 0 0 0 0 0  
48.6230 -10.8400 14.6000 H 0 0 0 0 0 0 0 0 0 0 0 0 0 0 0  
48.3260 -10.1600 12.6360 O 0 0 0 0 0 0 0 0 0 0 0 0 0 0 0  
48.0520 -11.4080 12.1560 C 0 0 0 0 0 0 0 0 0 0 0 0 0 0 0  
47.3480 -11.2800 10.8290 C 0 0 0 0 0 0 0 0 0 0 0 0 0 0 0  
46.4040 -10.7480 10.9880 H 0 0 0 0 0 0 0 0 0 0 0 0 0 0 0  
47.9990 -10.6850 10.1800 H 0 0 0 0 0 0 0 0 0 0 0 0 0 0 0  
47.0800 -12.6550 10.2110 C 0 0 0 0 0 0 0 0 0 0 0 0 0 0 0  
48.0250 -13.1960 10.0760 H 0 0 0 0 0 0 0 0 0 0 0 0 0 0 0  
46.5000 -13.2350 10.9430 H 0 0 0 0 0 0 0 0 0 0 0 0 0 0 0  
48.3550 -12.4560 12.7050 O 0 0 0 0 0 0 0 0 0 0 0 0 0 0 0  
50.5230 -10.2770 13.6920 C 0 0 0 0 0 0 0 0 0 0 0 0 0 0 0  
50.7190 -11.3020 13.3540 H 0 0 0 0 0 0 0 0 0 0 0 0 0 0 0  
50.9130 -9.6440 12.8860 H 0 0 0 0 0 0 0 0 0 0 0 0 0 0 0  
56.9340 -5.1830 27.6350 C 0 0 0 0 0 0 0 0 0 0 0 0 0 0 0  
57.4390 -5.8780 26.9530 H 0 0 0 0 0 0 0 0 0 0 0 0 0 0 0











|          |          |          |   |   |   |   |   |   |   |   |   |   |   |   |   |   |   |   |   |
|----------|----------|----------|---|---|---|---|---|---|---|---|---|---|---|---|---|---|---|---|---|
| 95.3800  | -4.4510  | -11.9290 | C | 0 | 0 | 0 | 0 | 0 | 0 | 0 | 0 | 0 | 0 | 0 | 0 | 0 | 0 | 0 | 0 |
| 94.4450  | -4.2180  | -11.4260 | H | 0 | 0 | 0 | 0 | 0 | 0 | 0 | 0 | 0 | 0 | 0 | 0 | 0 | 0 | 0 | 0 |
| 95.3400  | -4.6050  | -13.3220 | C | 0 | 0 | 0 | 0 | 0 | 0 | 0 | 0 | 0 | 0 | 0 | 0 | 0 | 0 | 0 | 0 |
| 94.3810  | -4.4900  | -13.8160 | H | 0 | 0 | 0 | 0 | 0 | 0 | 0 | 0 | 0 | 0 | 0 | 0 | 0 | 0 | 0 | 0 |
| 96.6680  | -4.4100  | -9.6780  | C | 0 | 0 | 0 | 0 | 0 | 0 | 0 | 0 | 0 | 0 | 0 | 0 | 0 | 0 | 0 | 0 |
| 97.2940  | -5.6550  | -9.0050  | C | 0 | 0 | 0 | 0 | 0 | 0 | 0 | 0 | 0 | 0 | 0 | 0 | 0 | 0 | 0 | 0 |
| 97.4670  | -3.1010  | -9.4350  | C | 0 | 0 | 0 | 0 | 0 | 0 | 0 | 0 | 0 | 0 | 0 | 0 | 0 | 0 | 0 | 0 |
| 98.5040  | -3.1750  | -9.7840  | H | 0 | 0 | 0 | 0 | 0 | 0 | 0 | 0 | 0 | 0 | 0 | 0 | 0 | 0 | 0 | 0 |
| 97.4970  | -2.8360  | -8.3710  | H | 0 | 0 | 0 | 0 | 0 | 0 | 0 | 0 | 0 | 0 | 0 | 0 | 0 | 0 | 0 | 0 |
| 97.0090  | -2.2550  | -9.9620  | H | 0 | 0 | 0 | 0 | 0 | 0 | 0 | 0 | 0 | 0 | 0 | 0 | 0 | 0 | 0 | 0 |
| 95.2900  | -4.1970  | -8.9950  | C | 0 | 0 | 0 | 0 | 0 | 0 | 0 | 0 | 0 | 0 | 0 | 0 | 0 | 0 | 0 | 0 |
| 94.8000  | -3.2810  | -9.3480  | H | 0 | 0 | 0 | 0 | 0 | 0 | 0 | 0 | 0 | 0 | 0 | 0 | 0 | 0 | 0 | 0 |
| 94.6020  | -5.0310  | -9.1770  | H | 0 | 0 | 0 | 0 | 0 | 0 | 0 | 0 | 0 | 0 | 0 | 0 | 0 | 0 | 0 | 0 |
| 95.3990  | -4.1020  | -7.9070  | H | 0 | 0 | 0 | 0 | 0 | 0 | 0 | 0 | 0 | 0 | 0 | 0 | 0 | 0 | 0 | 0 |
| 96.7580  | -6.9310  | -9.2610  | C | 0 | 0 | 0 | 0 | 0 | 0 | 0 | 0 | 0 | 0 | 0 | 0 | 0 | 0 | 0 | 0 |
| 95.9210  | -7.0500  | -9.9460  | H | 0 | 0 | 0 | 0 | 0 | 0 | 0 | 0 | 0 | 0 | 0 | 0 | 0 | 0 | 0 | 0 |
| 97.2810  | -8.0730  | -8.6470  | C | 0 | 0 | 0 | 0 | 0 | 0 | 0 | 0 | 0 | 0 | 0 | 0 | 0 | 0 | 0 | 0 |
| 96.8450  | -9.0450  | -8.8650  | H | 0 | 0 | 0 | 0 | 0 | 0 | 0 | 0 | 0 | 0 | 0 | 0 | 0 | 0 | 0 | 0 |
| 98.3460  | -7.9780  | -7.7510  | C | 0 | 0 | 0 | 0 | 0 | 0 | 0 | 0 | 0 | 0 | 0 | 0 | 0 | 0 | 0 | 0 |
| 98.8970  | -6.7260  | -7.4940  | C | 0 | 0 | 0 | 0 | 0 | 0 | 0 | 0 | 0 | 0 | 0 | 0 | 0 | 0 | 0 | 0 |
| 99.7380  | -6.5960  | -6.8220  | H | 0 | 0 | 0 | 0 | 0 | 0 | 0 | 0 | 0 | 0 | 0 | 0 | 0 | 0 | 0 | 0 |
| 98.3750  | -5.5780  | -8.1120  | C | 0 | 0 | 0 | 0 | 0 | 0 | 0 | 0 | 0 | 0 | 0 | 0 | 0 | 0 | 0 | 0 |
| 98.8380  | -4.6270  | -7.8650  | H | 0 | 0 | 0 | 0 | 0 | 0 | 0 | 0 | 0 | 0 | 0 | 0 | 0 | 0 | 0 | 0 |
| 98.7530  | -9.1700  | -7.2210  | O | 0 | 0 | 0 | 0 | 0 | 0 | 0 | 0 | 0 | 0 | 0 | 0 | 0 | 0 | 0 | 0 |
| 107.8300 | -11.0760 | -1.0090  | N | 0 | 0 | 0 | 0 | 0 | 0 | 0 | 0 | 0 | 0 | 0 | 0 | 0 | 0 | 0 | 0 |
| 108.4730 | -9.8720  | -1.0600  | C | 0 | 0 | 0 | 0 | 0 | 0 | 0 | 0 | 0 | 0 | 0 | 0 | 0 | 0 | 0 | 0 |
| 107.9660 | -8.9270  | -0.9300  | H | 0 | 0 | 0 | 0 | 0 | 0 | 0 | 0 | 0 | 0 | 0 | 0 | 0 | 0 | 0 | 0 |
| 109.7920 | -10.1900 | -1.2900  | C | 0 | 0 | 0 | 0 | 0 | 0 | 0 | 0 | 0 | 0 | 0 | 0 | 0 | 0 | 0 | 0 |
| 110.6290 | -9.5120  | -1.3920  | H | 0 | 0 | 0 | 0 | 0 | 0 | 0 | 0 | 0 | 0 | 0 | 0 | 0 | 0 | 0 | 0 |
| 109.9620 | -11.5480 | -1.3810  | N | 0 | 0 | 0 | 0 | 0 | 0 | 0 | 0 | 0 | 0 | 0 | 0 | 0 | 0 | 0 | 0 |
| 108.7610 | -12.0550 | -1.2090  | C | 0 | 0 | 0 | 0 | 0 | 0 | 0 | 0 | 0 | 0 | 0 | 0 | 0 | 0 | 0 | 0 |
| 108.5150 | -13.1080 | -1.2190  | H | 0 | 0 | 0 | 0 | 0 | 0 | 0 | 0 | 0 | 0 | 0 | 0 | 0 | 0 | 0 | 0 |
| 106.4150 | -11.2830 | -0.7730  | C | 0 | 0 | 0 | 0 | 0 | 0 | 0 | 0 | 0 | 0 | 0 | 0 | 0 | 0 | 0 | 0 |
| 106.3120 | -12.2130 | -0.2000  | H | 0 | 0 | 0 | 0 | 0 | 0 | 0 | 0 | 0 | 0 | 0 | 0 | 0 | 0 | 0 | 0 |
| 106.0630 | -10.4620 | -0.1370  | H | 0 | 0 | 0 | 0 | 0 | 0 | 0 | 0 | 0 | 0 | 0 | 0 | 0 | 0 | 0 | 0 |
| 105.6110 | -11.3480 | -2.0770  | C | 0 | 0 | 0 | 0 | 0 | 0 | 0 | 0 | 0 | 0 | 0 | 0 | 0 | 0 | 0 | 0 |
| 105.7550 | -10.4110 | -2.6270  | H | 0 | 0 | 0 | 0 | 0 | 0 | 0 | 0 | 0 | 0 | 0 | 0 | 0 | 0 | 0 | 0 |
| 105.9940 | -12.1630 | -2.7040  | H | 0 | 0 | 0 | 0 | 0 | 0 | 0 | 0 | 0 | 0 | 0 | 0 | 0 | 0 | 0 | 0 |
| 104.1890 | -11.5600 | -1.7860  | N | 0 | 0 | 3 | 0 | 0 | 0 | 0 | 0 | 0 | 0 | 0 | 0 | 0 | 0 | 0 | 0 |
| 104.0820 | -12.4180 | -1.2420  | H | 0 | 0 | 0 | 0 | 0 | 0 | 0 | 0 | 0 | 0 | 0 | 0 | 0 | 0 | 0 | 0 |
| 1        | 2        | 1        | 0 | 0 | 0 | 0 |   |   |   |   |   |   |   |   |   |   |   |   |   |
| 1        | 7        | 1        | 0 | 0 | 0 | 0 |   |   |   |   |   |   |   |   |   |   |   |   |   |
| 1        | 9        | 1        | 0 | 0 | 0 | 0 |   |   |   |   |   |   |   |   |   |   |   |   |   |
| 2        | 3        | 1        | 0 | 0 | 0 | 0 |   |   |   |   |   |   |   |   |   |   |   |   |   |
| 2        | 4        | 2        | 0 | 0 | 0 | 0 |   |   |   |   |   |   |   |   |   |   |   |   |   |
| 4        | 5        | 1        | 0 | 0 | 0 | 0 |   |   |   |   |   |   |   |   |   |   |   |   |   |
| 4        | 6        | 1        | 0 | 0 | 0 | 0 |   |   |   |   |   |   |   |   |   |   |   |   |   |
| 6        | 7        | 2        | 0 | 0 | 0 | 0 |   |   |   |   |   |   |   |   |   |   |   |   |   |
| 7        | 8        | 1        | 0 | 0 | 0 | 0 |   |   |   |   |   |   |   |   |   |   |   |   |   |
| 9        | 10       | 1        | 0 | 0 | 0 | 0 |   |   |   |   |   |   |   |   |   |   |   |   |   |
| 9        | 11       | 1        | 0 | 0 | 0 | 0 |   |   |   |   |   |   |   |   |   |   |   |   |   |
| 9        | 12       | 1        | 0 | 0 | 0 | 0 |   |   |   |   |   |   |   |   |   |   |   |   |   |
| 12       | 13       | 1        | 0 | 0 | 0 | 0 |   |   |   |   |   |   |   |   |   |   |   |   |   |
| 12       | 14       | 1        | 0 | 0 | 0 | 0 |   |   |   |   |   |   |   |   |   |   |   |   |   |
| 12       | 15       | 1        | 0 | 0 | 0 | 0 |   |   |   |   |   |   |   |   |   |   |   |   |   |
| 15       | 16       | 1        | 0 | 0 | 0 | 0 |   |   |   |   |   |   |   |   |   |   |   |   |   |
| 15       | 32       | 1        | 0 | 0 | 0 | 0 |   |   |   |   |   |   |   |   |   |   |   |   |   |
| 17       | 18       | 1        | 0 | 0 | 0 | 0 |   |   |   |   |   |   |   |   |   |   |   |   |   |
| 17       | 19       | 1        | 0 | 0 | 0 | 0 |   |   |   |   |   |   |   |   |   |   |   |   |   |
| 17       | 20       | 1        | 0 | 0 | 0 | 0 |   |   |   |   |   |   |   |   |   |   |   |   |   |
| 17       | 29       | 1        | 0 | 0 | 0 | 0 |   |   |   |   |   |   |   |   |   |   |   |   |   |
| 20       | 21       | 1        | 0 | 0 | 0 | 0 |   |   |   |   |   |   |   |   |   |   |   |   |   |
| 21       | 22       | 1        | 0 | 0 | 0 | 0 |   |   |   |   |   |   |   |   |   |   |   |   |   |
| 21       | 28       | 2        | 0 | 0 | 0 | 0 |   |   |   |   |   |   |   |   |   |   |   |   |   |
| 22       | 23       | 1        | 0 | 0 | 0 | 0 |   |   |   |   |   |   |   |   |   |   |   |   |   |
| 22       | 24       | 1        | 0 | 0 | 0 | 0 |   |   |   |   |   |   |   |   |   |   |   |   |   |
| 22       | 25       | 1        | 0 | 0 | 0 | 0 |   |   |   |   |   |   |   |   |   |   |   |   |   |
| 25       | 26       | 1        | 0 | 0 | 0 | 0 |   |   |   |   |   |   |   |   |   |   |   |   |   |
| 25       | 27       | 1        | 0 | 0 | 0 | 0 |   |   |   |   |   |   |   |   |   |   |   |   |   |
| 25       | 92       | 1        | 0 | 0 | 0 | 0 |   |   |   |   |   |   |   |   |   |   |   |   |   |
| 29       | 30       | 1        | 0 | 0 | 0 | 0 |   |   |   |   |   |   |   |   |   |   |   |   |   |
| 29       | 31       | 1        | 0 | 0 | 0 | 0 |   |   |   |   |   |   |   |   |   |   |   |   |   |
| 29       | 77       | 1        | 0 | 0 | 0 | 0 |   |   |   |   |   |   |   |   |   |   |   |   |   |
| 32       | 33       | 1        | 0 | 0 | 0 | 0 |   |   |   |   |   |   |   |   |   |   |   |   |   |
| 32       | 34       | 1        | 0 | 0 | 0 | 0 |   |   |   |   |   |   |   |   |   |   |   |   |   |
| 32       | 35       | 1        | 0 | 0 | 0 | 0 |   |   |   |   |   |   |   |   |   |   |   |   |   |
| 35       | 36       | 1        | 0 | 0 | 0 | 0 |   |   |   |   |   |   |   |   |   |   |   |   |   |
| 35       | 37       | 1        | 0 | 0 | 0 | 0 |   |   |   |   |   |   |   |   |   |   |   |   |   |
| 35       | 38       | 1        | 0 | 0 | 0 | 0 |   |   |   |   |   |   |   |   |   |   |   |   |   |
| 38       | 39       | 1        | 0 | 0 | 0 | 0 |   |   |   |   |   |   |   |   |   |   |   |   |   |
| 38       | 46       | 2        | 0 | 0 | 0 | 0 |   |   |   |   |   |   |   |   |   |   |   |   |   |

|     |     |   |   |   |   |   |
|-----|-----|---|---|---|---|---|
| 39  | 40  | 1 | 0 | 0 | 0 | 0 |
| 40  | 41  | 1 | 0 | 0 | 0 | 0 |
| 40  | 42  | 1 | 0 | 0 | 0 | 0 |
| 40  | 43  | 1 | 0 | 0 | 0 | 0 |
| 43  | 44  | 1 | 0 | 0 | 0 | 0 |
| 43  | 45  | 1 | 0 | 0 | 0 | 0 |
| 43  | 47  | 1 | 0 | 0 | 0 | 0 |
| 47  | 48  | 1 | 0 | 0 | 0 | 0 |
| 48  | 49  | 1 | 0 | 0 | 0 | 0 |
| 48  | 56  | 2 | 0 | 0 | 0 | 0 |
| 49  | 50  | 1 | 0 | 0 | 0 | 0 |
| 49  | 51  | 2 | 0 | 0 | 0 | 0 |
| 51  | 52  | 1 | 0 | 0 | 0 | 0 |
| 51  | 53  | 1 | 0 | 0 | 0 | 0 |
| 53  | 54  | 2 | 0 | 0 | 0 | 0 |
| 53  | 58  | 1 | 0 | 0 | 0 | 0 |
| 54  | 55  | 1 | 0 | 0 | 0 | 0 |
| 54  | 56  | 1 | 0 | 0 | 0 | 0 |
| 56  | 57  | 1 | 0 | 0 | 0 | 0 |
| 58  | 59  | 1 | 0 | 0 | 0 | 0 |
| 58  | 60  | 1 | 0 | 0 | 0 | 0 |
| 58  | 64  | 1 | 0 | 0 | 0 | 0 |
| 59  | 68  | 1 | 0 | 0 | 0 | 0 |
| 59  | 75  | 2 | 0 | 0 | 0 | 0 |
| 60  | 61  | 1 | 0 | 0 | 0 | 0 |
| 60  | 62  | 1 | 0 | 0 | 0 | 0 |
| 60  | 63  | 1 | 0 | 0 | 0 | 0 |
| 64  | 65  | 1 | 0 | 0 | 0 | 0 |
| 64  | 66  | 1 | 0 | 0 | 0 | 0 |
| 64  | 67  | 1 | 0 | 0 | 0 | 0 |
| 68  | 69  | 1 | 0 | 0 | 0 | 0 |
| 68  | 70  | 2 | 0 | 0 | 0 | 0 |
| 70  | 71  | 1 | 0 | 0 | 0 | 0 |
| 70  | 72  | 1 | 0 | 0 | 0 | 0 |
| 72  | 73  | 2 | 0 | 0 | 0 | 0 |
| 72  | 77  | 1 | 0 | 0 | 0 | 0 |
| 73  | 74  | 1 | 0 | 0 | 0 | 0 |
| 73  | 75  | 1 | 0 | 0 | 0 | 0 |
| 75  | 76  | 1 | 0 | 0 | 0 | 0 |
| 78  | 79  | 1 | 0 | 0 | 0 | 0 |
| 78  | 84  | 1 | 0 | 0 | 0 | 0 |
| 78  | 86  | 1 | 0 | 0 | 0 | 0 |
| 79  | 80  | 1 | 0 | 0 | 0 | 0 |
| 79  | 81  | 2 | 0 | 0 | 0 | 0 |
| 81  | 82  | 1 | 0 | 0 | 0 | 0 |
| 81  | 83  | 1 | 0 | 0 | 0 | 0 |
| 83  | 84  | 2 | 0 | 0 | 0 | 0 |
| 84  | 85  | 1 | 0 | 0 | 0 | 0 |
| 86  | 87  | 1 | 0 | 0 | 0 | 0 |
| 86  | 88  | 1 | 0 | 0 | 0 | 0 |
| 86  | 89  | 1 | 0 | 0 | 0 | 0 |
| 89  | 90  | 1 | 0 | 0 | 0 | 0 |
| 89  | 91  | 1 | 0 | 0 | 0 | 0 |
| 89  | 92  | 1 | 0 | 0 | 0 | 0 |
| 92  | 108 | 1 | 0 | 0 | 0 | 0 |
| 93  | 94  | 1 | 0 | 0 | 0 | 0 |
| 93  | 95  | 1 | 0 | 0 | 0 | 0 |
| 93  | 96  | 1 | 0 | 0 | 0 | 0 |
| 93  | 105 | 1 | 0 | 0 | 0 | 0 |
| 96  | 97  | 1 | 0 | 0 | 0 | 0 |
| 97  | 98  | 1 | 0 | 0 | 0 | 0 |
| 97  | 104 | 2 | 0 | 0 | 0 | 0 |
| 98  | 99  | 1 | 0 | 0 | 0 | 0 |
| 98  | 100 | 1 | 0 | 0 | 0 | 0 |
| 98  | 101 | 1 | 0 | 0 | 0 | 0 |
| 101 | 102 | 1 | 0 | 0 | 0 | 0 |
| 101 | 103 | 1 | 0 | 0 | 0 | 0 |
| 101 | 168 | 1 | 0 | 0 | 0 | 0 |
| 105 | 106 | 1 | 0 | 0 | 0 | 0 |
| 105 | 107 | 1 | 0 | 0 | 0 | 0 |
| 105 | 153 | 1 | 0 | 0 | 0 | 0 |
| 108 | 109 | 1 | 0 | 0 | 0 | 0 |
| 108 | 110 | 1 | 0 | 0 | 0 | 0 |
| 108 | 111 | 1 | 0 | 0 | 0 | 0 |
| 111 | 112 | 1 | 0 | 0 | 0 | 0 |
| 111 | 113 | 1 | 0 | 0 | 0 | 0 |
| 111 | 114 | 1 | 0 | 0 | 0 | 0 |
| 114 | 115 | 1 | 0 | 0 | 0 | 0 |
| 114 | 122 | 2 | 0 | 0 | 0 | 0 |
| 115 | 116 | 1 | 0 | 0 | 0 | 0 |
| 116 | 117 | 1 | 0 | 0 | 0 | 0 |

|        |   |   |   |   |   |
|--------|---|---|---|---|---|
| 116118 | 1 | 0 | 0 | 0 | 0 |
| 116119 | 1 | 0 | 0 | 0 | 0 |
| 119120 | 1 | 0 | 0 | 0 | 0 |
| 119121 | 1 | 0 | 0 | 0 | 0 |
| 119123 | 1 | 0 | 0 | 0 | 0 |
| 123124 | 1 | 0 | 0 | 0 | 0 |
| 124125 | 1 | 0 | 0 | 0 | 0 |
| 124132 | 2 | 0 | 0 | 0 | 0 |
| 125126 | 1 | 0 | 0 | 0 | 0 |
| 125127 | 2 | 0 | 0 | 0 | 0 |
| 127128 | 1 | 0 | 0 | 0 | 0 |
| 127129 | 1 | 0 | 0 | 0 | 0 |
| 129130 | 2 | 0 | 0 | 0 | 0 |
| 129134 | 1 | 0 | 0 | 0 | 0 |
| 130131 | 1 | 0 | 0 | 0 | 0 |
| 130132 | 1 | 0 | 0 | 0 | 0 |
| 132133 | 1 | 0 | 0 | 0 | 0 |
| 134135 | 1 | 0 | 0 | 0 | 0 |
| 134136 | 1 | 0 | 0 | 0 | 0 |
| 134140 | 1 | 0 | 0 | 0 | 0 |
| 135144 | 1 | 0 | 0 | 0 | 0 |
| 135151 | 2 | 0 | 0 | 0 | 0 |
| 136137 | 1 | 0 | 0 | 0 | 0 |
| 136138 | 1 | 0 | 0 | 0 | 0 |
| 136139 | 1 | 0 | 0 | 0 | 0 |
| 140141 | 1 | 0 | 0 | 0 | 0 |
| 140142 | 1 | 0 | 0 | 0 | 0 |
| 140143 | 1 | 0 | 0 | 0 | 0 |
| 144145 | 1 | 0 | 0 | 0 | 0 |
| 144146 | 2 | 0 | 0 | 0 | 0 |
| 146147 | 1 | 0 | 0 | 0 | 0 |
| 146148 | 1 | 0 | 0 | 0 | 0 |
| 148149 | 2 | 0 | 0 | 0 | 0 |
| 148153 | 1 | 0 | 0 | 0 | 0 |
| 149150 | 1 | 0 | 0 | 0 | 0 |
| 149151 | 1 | 0 | 0 | 0 | 0 |
| 151152 | 1 | 0 | 0 | 0 | 0 |
| 154155 | 1 | 0 | 0 | 0 | 0 |
| 154160 | 1 | 0 | 0 | 0 | 0 |
| 154162 | 1 | 0 | 0 | 0 | 0 |
| 155156 | 1 | 0 | 0 | 0 | 0 |
| 155157 | 2 | 0 | 0 | 0 | 0 |
| 157158 | 1 | 0 | 0 | 0 | 0 |
| 157159 | 1 | 0 | 0 | 0 | 0 |
| 159160 | 2 | 0 | 0 | 0 | 0 |
| 160161 | 1 | 0 | 0 | 0 | 0 |
| 162163 | 1 | 0 | 0 | 0 | 0 |
| 162164 | 1 | 0 | 0 | 0 | 0 |
| 162165 | 1 | 0 | 0 | 0 | 0 |
| 165166 | 1 | 0 | 0 | 0 | 0 |
| 165167 | 1 | 0 | 0 | 0 | 0 |
| 165168 | 1 | 0 | 0 | 0 | 0 |
| 168184 | 1 | 0 | 0 | 0 | 0 |
| 169170 | 1 | 0 | 0 | 0 | 0 |
| 169171 | 1 | 0 | 0 | 0 | 0 |
| 169172 | 1 | 0 | 0 | 0 | 0 |
| 169181 | 1 | 0 | 0 | 0 | 0 |
| 172173 | 1 | 0 | 0 | 0 | 0 |
| 173174 | 1 | 0 | 0 | 0 | 0 |
| 173180 | 2 | 0 | 0 | 0 | 0 |
| 174175 | 1 | 0 | 0 | 0 | 0 |
| 174176 | 1 | 0 | 0 | 0 | 0 |
| 174177 | 1 | 0 | 0 | 0 | 0 |
| 177178 | 1 | 0 | 0 | 0 | 0 |
| 177179 | 1 | 0 | 0 | 0 | 0 |
| 177244 | 1 | 0 | 0 | 0 | 0 |
| 181182 | 1 | 0 | 0 | 0 | 0 |
| 181183 | 1 | 0 | 0 | 0 | 0 |
| 181229 | 1 | 0 | 0 | 0 | 0 |
| 184185 | 1 | 0 | 0 | 0 | 0 |
| 184186 | 1 | 0 | 0 | 0 | 0 |
| 184187 | 1 | 0 | 0 | 0 | 0 |
| 187188 | 1 | 0 | 0 | 0 | 0 |
| 187189 | 1 | 0 | 0 | 0 | 0 |
| 187190 | 1 | 0 | 0 | 0 | 0 |
| 190191 | 1 | 0 | 0 | 0 | 0 |
| 190198 | 2 | 0 | 0 | 0 | 0 |
| 191192 | 1 | 0 | 0 | 0 | 0 |
| 192193 | 1 | 0 | 0 | 0 | 0 |
| 192194 | 1 | 0 | 0 | 0 | 0 |
| 192195 | 1 | 0 | 0 | 0 | 0 |

|        |   |   |   |   |   |
|--------|---|---|---|---|---|
| 195196 | 1 | 0 | 0 | 0 | 0 |
| 195197 | 1 | 0 | 0 | 0 | 0 |
| 195199 | 1 | 0 | 0 | 0 | 0 |
| 199200 | 1 | 0 | 0 | 0 | 0 |
| 200201 | 1 | 0 | 0 | 0 | 0 |
| 200208 | 2 | 0 | 0 | 0 | 0 |
| 201202 | 1 | 0 | 0 | 0 | 0 |
| 201203 | 2 | 0 | 0 | 0 | 0 |
| 203204 | 1 | 0 | 0 | 0 | 0 |
| 203205 | 1 | 0 | 0 | 0 | 0 |
| 205206 | 2 | 0 | 0 | 0 | 0 |
| 205210 | 1 | 0 | 0 | 0 | 0 |
| 206207 | 1 | 0 | 0 | 0 | 0 |
| 206208 | 1 | 0 | 0 | 0 | 0 |
| 208209 | 1 | 0 | 0 | 0 | 0 |
| 210211 | 1 | 0 | 0 | 0 | 0 |
| 210212 | 1 | 0 | 0 | 0 | 0 |
| 210216 | 1 | 0 | 0 | 0 | 0 |
| 211220 | 1 | 0 | 0 | 0 | 0 |
| 211227 | 2 | 0 | 0 | 0 | 0 |
| 212213 | 1 | 0 | 0 | 0 | 0 |
| 212214 | 1 | 0 | 0 | 0 | 0 |
| 212215 | 1 | 0 | 0 | 0 | 0 |
| 216217 | 1 | 0 | 0 | 0 | 0 |
| 216218 | 1 | 0 | 0 | 0 | 0 |
| 216219 | 1 | 0 | 0 | 0 | 0 |
| 220221 | 1 | 0 | 0 | 0 | 0 |
| 220222 | 2 | 0 | 0 | 0 | 0 |
| 222223 | 1 | 0 | 0 | 0 | 0 |
| 222224 | 1 | 0 | 0 | 0 | 0 |
| 224225 | 2 | 0 | 0 | 0 | 0 |
| 224229 | 1 | 0 | 0 | 0 | 0 |
| 225226 | 1 | 0 | 0 | 0 | 0 |
| 225227 | 1 | 0 | 0 | 0 | 0 |
| 227228 | 1 | 0 | 0 | 0 | 0 |
| 230231 | 1 | 0 | 0 | 0 | 0 |
| 230236 | 1 | 0 | 0 | 0 | 0 |
| 230238 | 1 | 0 | 0 | 0 | 0 |
| 231232 | 1 | 0 | 0 | 0 | 0 |
| 231233 | 2 | 0 | 0 | 0 | 0 |
| 233234 | 1 | 0 | 0 | 0 | 0 |
| 233235 | 1 | 0 | 0 | 0 | 0 |
| 235236 | 2 | 0 | 0 | 0 | 0 |
| 236237 | 1 | 0 | 0 | 0 | 0 |
| 238239 | 1 | 0 | 0 | 0 | 0 |
| 238240 | 1 | 0 | 0 | 0 | 0 |
| 238241 | 1 | 0 | 0 | 0 | 0 |
| 241242 | 1 | 0 | 0 | 0 | 0 |
| 241243 | 1 | 0 | 0 | 0 | 0 |
| 241244 | 1 | 0 | 0 | 0 | 0 |
| 244260 | 1 | 0 | 0 | 0 | 0 |
| 245246 | 1 | 0 | 0 | 0 | 0 |
| 245247 | 1 | 0 | 0 | 0 | 0 |
| 245248 | 1 | 0 | 0 | 0 | 0 |
| 245257 | 1 | 0 | 0 | 0 | 0 |
| 248249 | 1 | 0 | 0 | 0 | 0 |
| 249250 | 1 | 0 | 0 | 0 | 0 |
| 249256 | 2 | 0 | 0 | 0 | 0 |
| 250251 | 1 | 0 | 0 | 0 | 0 |
| 250252 | 1 | 0 | 0 | 0 | 0 |
| 250253 | 1 | 0 | 0 | 0 | 0 |
| 253254 | 1 | 0 | 0 | 0 | 0 |
| 253255 | 1 | 0 | 0 | 0 | 0 |
| 253320 | 1 | 0 | 0 | 0 | 0 |
| 257258 | 1 | 0 | 0 | 0 | 0 |
| 257259 | 1 | 0 | 0 | 0 | 0 |
| 257305 | 1 | 0 | 0 | 0 | 0 |
| 260261 | 1 | 0 | 0 | 0 | 0 |
| 260262 | 1 | 0 | 0 | 0 | 0 |
| 260263 | 1 | 0 | 0 | 0 | 0 |
| 263264 | 1 | 0 | 0 | 0 | 0 |
| 263265 | 1 | 0 | 0 | 0 | 0 |
| 263266 | 1 | 0 | 0 | 0 | 0 |
| 266267 | 1 | 0 | 0 | 0 | 0 |
| 266274 | 2 | 0 | 0 | 0 | 0 |
| 267268 | 1 | 0 | 0 | 0 | 0 |
| 268269 | 1 | 0 | 0 | 0 | 0 |
| 268270 | 1 | 0 | 0 | 0 | 0 |
| 268271 | 1 | 0 | 0 | 0 | 0 |
| 271272 | 1 | 0 | 0 | 0 | 0 |
| 271273 | 1 | 0 | 0 | 0 | 0 |

|        |   |   |   |   |   |
|--------|---|---|---|---|---|
| 271275 | 1 | 0 | 0 | 0 | 0 |
| 275276 | 1 | 0 | 0 | 0 | 0 |
| 276277 | 1 | 0 | 0 | 0 | 0 |
| 276284 | 2 | 0 | 0 | 0 | 0 |
| 277278 | 1 | 0 | 0 | 0 | 0 |
| 277279 | 2 | 0 | 0 | 0 | 0 |
| 279280 | 1 | 0 | 0 | 0 | 0 |
| 279281 | 1 | 0 | 0 | 0 | 0 |
| 281282 | 2 | 0 | 0 | 0 | 0 |
| 281286 | 1 | 0 | 0 | 0 | 0 |
| 282283 | 1 | 0 | 0 | 0 | 0 |
| 282284 | 1 | 0 | 0 | 0 | 0 |
| 284285 | 1 | 0 | 0 | 0 | 0 |
| 286287 | 1 | 0 | 0 | 0 | 0 |
| 286288 | 1 | 0 | 0 | 0 | 0 |
| 286292 | 1 | 0 | 0 | 0 | 0 |
| 287296 | 1 | 0 | 0 | 0 | 0 |
| 287303 | 2 | 0 | 0 | 0 | 0 |
| 288289 | 1 | 0 | 0 | 0 | 0 |
| 288290 | 1 | 0 | 0 | 0 | 0 |
| 288291 | 1 | 0 | 0 | 0 | 0 |
| 292293 | 1 | 0 | 0 | 0 | 0 |
| 292294 | 1 | 0 | 0 | 0 | 0 |
| 292295 | 1 | 0 | 0 | 0 | 0 |
| 296297 | 1 | 0 | 0 | 0 | 0 |
| 296298 | 2 | 0 | 0 | 0 | 0 |
| 298299 | 1 | 0 | 0 | 0 | 0 |
| 298300 | 1 | 0 | 0 | 0 | 0 |
| 300301 | 2 | 0 | 0 | 0 | 0 |
| 300305 | 1 | 0 | 0 | 0 | 0 |
| 301302 | 1 | 0 | 0 | 0 | 0 |
| 301303 | 1 | 0 | 0 | 0 | 0 |
| 303304 | 1 | 0 | 0 | 0 | 0 |
| 306307 | 1 | 0 | 0 | 0 | 0 |
| 306312 | 1 | 0 | 0 | 0 | 0 |
| 306314 | 1 | 0 | 0 | 0 | 0 |
| 307308 | 1 | 0 | 0 | 0 | 0 |
| 307309 | 2 | 0 | 0 | 0 | 0 |
| 309310 | 1 | 0 | 0 | 0 | 0 |
| 309311 | 1 | 0 | 0 | 0 | 0 |
| 311312 | 2 | 0 | 0 | 0 | 0 |
| 312313 | 1 | 0 | 0 | 0 | 0 |
| 314315 | 1 | 0 | 0 | 0 | 0 |
| 314316 | 1 | 0 | 0 | 0 | 0 |
| 314317 | 1 | 0 | 0 | 0 | 0 |
| 317318 | 1 | 0 | 0 | 0 | 0 |
| 317319 | 1 | 0 | 0 | 0 | 0 |
| 317320 | 1 | 0 | 0 | 0 | 0 |
| 320336 | 1 | 0 | 0 | 0 | 0 |
| 321322 | 1 | 0 | 0 | 0 | 0 |
| 321323 | 1 | 0 | 0 | 0 | 0 |
| 321324 | 1 | 0 | 0 | 0 | 0 |
| 321333 | 1 | 0 | 0 | 0 | 0 |
| 324325 | 1 | 0 | 0 | 0 | 0 |
| 325326 | 1 | 0 | 0 | 0 | 0 |
| 325332 | 2 | 0 | 0 | 0 | 0 |
| 326327 | 1 | 0 | 0 | 0 | 0 |
| 326328 | 1 | 0 | 0 | 0 | 0 |
| 326329 | 1 | 0 | 0 | 0 | 0 |
| 329330 | 1 | 0 | 0 | 0 | 0 |
| 329331 | 1 | 0 | 0 | 0 | 0 |
| 329396 | 1 | 0 | 0 | 0 | 0 |
| 333334 | 1 | 0 | 0 | 0 | 0 |
| 333335 | 1 | 0 | 0 | 0 | 0 |
| 333381 | 1 | 0 | 0 | 0 | 0 |
| 336337 | 1 | 0 | 0 | 0 | 0 |
| 336338 | 1 | 0 | 0 | 0 | 0 |
| 336339 | 1 | 0 | 0 | 0 | 0 |
| 339340 | 1 | 0 | 0 | 0 | 0 |
| 339341 | 1 | 0 | 0 | 0 | 0 |
| 339342 | 1 | 0 | 0 | 0 | 0 |
| 342343 | 1 | 0 | 0 | 0 | 0 |
| 342350 | 2 | 0 | 0 | 0 | 0 |
| 343344 | 1 | 0 | 0 | 0 | 0 |
| 344345 | 1 | 0 | 0 | 0 | 0 |
| 344346 | 1 | 0 | 0 | 0 | 0 |
| 344347 | 1 | 0 | 0 | 0 | 0 |
| 347348 | 1 | 0 | 0 | 0 | 0 |
| 347349 | 1 | 0 | 0 | 0 | 0 |
| 347351 | 1 | 0 | 0 | 0 | 0 |
| 351352 | 1 | 0 | 0 | 0 | 0 |

352353 1 0 0 0 0  
352360 2 0 0 0 0  
353354 1 0 0 0 0  
353355 2 0 0 0 0  
355356 1 0 0 0 0  
355357 1 0 0 0 0  
357358 2 0 0 0 0  
357362 1 0 0 0 0  
358359 1 0 0 0 0  
358360 1 0 0 0 0  
360361 1 0 0 0 0  
362363 1 0 0 0 0  
362364 1 0 0 0 0  
362368 1 0 0 0 0  
363372 1 0 0 0 0  
363379 2 0 0 0 0  
364365 1 0 0 0 0  
364366 1 0 0 0 0  
364367 1 0 0 0 0  
368369 1 0 0 0 0  
368370 1 0 0 0 0  
368371 1 0 0 0 0  
372373 1 0 0 0 0  
372374 2 0 0 0 0  
374375 1 0 0 0 0  
374376 1 0 0 0 0  
376377 2 0 0 0 0  
376381 1 0 0 0 0  
377378 1 0 0 0 0  
377379 1 0 0 0 0  
379380 1 0 0 0 0  
382383 1 0 0 0 0  
382388 1 0 0 0 0  
382390 1 0 0 0 0  
383384 1 0 0 0 0  
383385 2 0 0 0 0  
385386 1 0 0 0 0  
385387 1 0 0 0 0  
387388 2 0 0 0 0  
388389 1 0 0 0 0  
390391 1 0 0 0 0  
390392 1 0 0 0 0  
390393 1 0 0 0 0  
393394 1 0 0 0 0  
393395 1 0 0 0 0  
393396 1 0 0 0 0  
396397 1 0 0 0 0

M END  
> <NAME>  
D94\_12

\$\$\$  
E20\_12  
MOE2012 3D

254253 0 0 1 0 0 0 0 0999 V2000  
34.1180 -19.2390 -35.5210 O 0 0 0 0 0 0 0 0 0 0 0 0 0 0 0  
34.5650 -20.0200 -35.8910 H 0 0 0 0 0 0 0 0 0 0 0 0 0 0 0  
34.9120 -18.7760 -34.4360 C 0 0 0 0 0 0 0 0 0 0 0 0 0 0 0  
35.0070 -19.5840 -33.7040 H 0 0 0 0 0 0 0 0 0 0 0 0 0 0 0  
35.9060 -18.5220 -34.8170 H 0 0 0 0 0 0 0 0 0 0 0 0 0 0 0  
34.2400 -17.5580 -33.8160 C 0 0 0 0 0 0 0 0 0 0 0 0 0 0 0  
34.1000 -16.7910 -34.5880 H 0 0 0 0 0 0 0 0 0 0 0 0 0 0 0  
33.2310 -17.8340 -33.4810 H 0 0 0 0 0 0 0 0 0 0 0 0 0 0 0  
35.0570 -17.0030 -32.6500 C 0 0 0 0 0 0 0 0 0 0 0 0 0 0 0  
35.1840 -17.7840 -31.8910 H 0 0 0 0 0 0 0 0 0 0 0 0 0 0 0  
36.0520 -16.7110 -33.0080 H 0 0 0 0 0 0 0 0 0 0 0 0 0 0 0  
34.3690 -15.8500 -32.0690 N 0 0 3 0 0 0 0 0 0 0 0 0 0 0 0  
34.2200 -15.1430 -32.7890 H 0 0 0 0 0 0 0 0 0 0 0 0 0 0 0  
33.2280 -7.0960 -23.6420 C 0 0 0 0 0 0 0 0 0 0 0 0 0 0 0  
32.2820 -7.5560 -23.3330 H 0 0 0 0 0 0 0 0 0 0 0 0 0 0 0  
33.0380 -6.3590 -24.4310 H 0 0 0 0 0 0 0 0 0 0 0 0 0 0 0  
33.8300 -6.4400 -22.5160 O 0 0 0 0 0 0 0 0 0 0 0 0 0 0 0  
33.0600 -5.4740 -21.9470 C 0 0 0 0 0 0 0 0 0 0 0 0 0 0 0  
33.7550 -4.8710 -20.7580 C 0 0 0 0 0 0 0 0 0 0 0 0 0 0 0  
34.8310 -4.7970 -20.9630 H 0 0 0 0 0 0 0 0 0 0 0 0 0 0 0  
33.4120 -3.8360 -20.6660 H 0 0 0 0 0 0 0 0 0 0 0 0 0 0 0  
33.4950 -5.7070 -19.5040 C 0 0 0 0 0 0 0 0 0 0 0 0 0 0 0  
32.7140 -6.4610 -19.6410 H 0 0 0 0 0 0 0 0 0 0 0 0 0 0 0  
34.4070 -6.3010 -19.3450 H 0 0 0 0 0 0 0 0 0 0 0 0 0 0 0  
31.9330 -5.1520 -22.3130 O 0 0 0 0 0 0 0 0 0 0 0 0 0 0 0









|    |     |   |   |   |   |   |
|----|-----|---|---|---|---|---|
| 14 | 16  | 1 | 0 | 0 | 0 | 0 |
| 14 | 17  | 1 | 0 | 0 | 0 | 0 |
| 14 | 26  | 1 | 0 | 0 | 0 | 0 |
| 17 | 18  | 1 | 0 | 0 | 0 | 0 |
| 18 | 19  | 1 | 0 | 0 | 0 | 0 |
| 18 | 25  | 2 | 0 | 0 | 0 | 0 |
| 19 | 20  | 1 | 0 | 0 | 0 | 0 |
| 19 | 21  | 1 | 0 | 0 | 0 | 0 |
| 19 | 22  | 1 | 0 | 0 | 0 | 0 |
| 22 | 23  | 1 | 0 | 0 | 0 | 0 |
| 22 | 24  | 1 | 0 | 0 | 0 | 0 |
| 22 | 61  | 1 | 0 | 0 | 0 | 0 |
| 26 | 27  | 1 | 0 | 0 | 0 | 0 |
| 26 | 28  | 1 | 0 | 0 | 0 | 0 |
| 26 | 47  | 1 | 0 | 0 | 0 | 0 |
| 29 | 30  | 1 | 0 | 0 | 0 | 0 |
| 29 | 31  | 1 | 0 | 0 | 0 | 0 |
| 29 | 32  | 1 | 0 | 0 | 0 | 0 |
| 32 | 33  | 1 | 0 | 0 | 0 | 0 |
| 32 | 34  | 1 | 0 | 0 | 0 | 0 |
| 32 | 35  | 1 | 0 | 0 | 0 | 0 |
| 35 | 36  | 1 | 0 | 0 | 0 | 0 |
| 35 | 43  | 2 | 0 | 0 | 0 | 0 |
| 36 | 37  | 1 | 0 | 0 | 0 | 0 |
| 37 | 38  | 1 | 0 | 0 | 0 | 0 |
| 37 | 39  | 1 | 0 | 0 | 0 | 0 |
| 37 | 40  | 1 | 0 | 0 | 0 | 0 |
| 40 | 41  | 1 | 0 | 0 | 0 | 0 |
| 40 | 42  | 1 | 0 | 0 | 0 | 0 |
| 40 | 44  | 1 | 0 | 0 | 0 | 0 |
| 44 | 45  | 1 | 0 | 0 | 0 | 0 |
| 44 | 46  | 1 | 0 | 0 | 0 | 0 |
| 44 | 47  | 1 | 0 | 0 | 0 | 0 |
| 47 | 48  | 1 | 0 | 0 | 0 | 0 |
| 47 | 49  | 1 | 0 | 0 | 0 | 0 |
| 50 | 51  | 1 | 0 | 0 | 0 | 0 |
| 50 | 52  | 1 | 0 | 0 | 0 | 0 |
| 52 | 53  | 1 | 0 | 0 | 0 | 0 |
| 52 | 54  | 1 | 0 | 0 | 0 | 0 |
| 52 | 55  | 1 | 0 | 0 | 0 | 0 |
| 55 | 56  | 1 | 0 | 0 | 0 | 0 |
| 55 | 57  | 1 | 0 | 0 | 0 | 0 |
| 55 | 58  | 1 | 0 | 0 | 0 | 0 |
| 58 | 59  | 1 | 0 | 0 | 0 | 0 |
| 58 | 60  | 1 | 0 | 0 | 0 | 0 |
| 58 | 61  | 1 | 0 | 0 | 0 | 0 |
| 61 | 77  | 1 | 0 | 0 | 0 | 0 |
| 62 | 63  | 1 | 0 | 0 | 0 | 0 |
| 62 | 64  | 1 | 0 | 0 | 0 | 0 |
| 62 | 65  | 1 | 0 | 0 | 0 | 0 |
| 62 | 74  | 1 | 0 | 0 | 0 | 0 |
| 65 | 66  | 1 | 0 | 0 | 0 | 0 |
| 66 | 67  | 1 | 0 | 0 | 0 | 0 |
| 66 | 73  | 2 | 0 | 0 | 0 | 0 |
| 67 | 68  | 1 | 0 | 0 | 0 | 0 |
| 67 | 69  | 1 | 0 | 0 | 0 | 0 |
| 67 | 70  | 1 | 0 | 0 | 0 | 0 |
| 70 | 71  | 1 | 0 | 0 | 0 | 0 |
| 70 | 72  | 1 | 0 | 0 | 0 | 0 |
| 70 | 109 | 1 | 0 | 0 | 0 | 0 |
| 74 | 75  | 1 | 0 | 0 | 0 | 0 |
| 74 | 76  | 1 | 0 | 0 | 0 | 0 |
| 74 | 95  | 1 | 0 | 0 | 0 | 0 |
| 77 | 78  | 1 | 0 | 0 | 0 | 0 |
| 77 | 79  | 1 | 0 | 0 | 0 | 0 |
| 77 | 80  | 1 | 0 | 0 | 0 | 0 |
| 80 | 81  | 1 | 0 | 0 | 0 | 0 |
| 80 | 82  | 1 | 0 | 0 | 0 | 0 |
| 80 | 83  | 1 | 0 | 0 | 0 | 0 |
| 83 | 84  | 1 | 0 | 0 | 0 | 0 |
| 83 | 91  | 2 | 0 | 0 | 0 | 0 |
| 84 | 85  | 1 | 0 | 0 | 0 | 0 |
| 85 | 86  | 1 | 0 | 0 | 0 | 0 |
| 85 | 87  | 1 | 0 | 0 | 0 | 0 |
| 85 | 88  | 1 | 0 | 0 | 0 | 0 |
| 88 | 89  | 1 | 0 | 0 | 0 | 0 |
| 88 | 90  | 1 | 0 | 0 | 0 | 0 |
| 88 | 92  | 1 | 0 | 0 | 0 | 0 |
| 92 | 93  | 1 | 0 | 0 | 0 | 0 |
| 92 | 94  | 1 | 0 | 0 | 0 | 0 |
| 92 | 95  | 1 | 0 | 0 | 0 | 0 |

|        |   |   |   |   |   |
|--------|---|---|---|---|---|
| 95 96  | 1 | 0 | 0 | 0 | 0 |
| 95 97  | 1 | 0 | 0 | 0 | 0 |
| 98 99  | 1 | 0 | 0 | 0 | 0 |
| 98100  | 1 | 0 | 0 | 0 | 0 |
| 100101 | 1 | 0 | 0 | 0 | 0 |
| 100102 | 1 | 0 | 0 | 0 | 0 |
| 100103 | 1 | 0 | 0 | 0 | 0 |
| 103104 | 1 | 0 | 0 | 0 | 0 |
| 103105 | 1 | 0 | 0 | 0 | 0 |
| 103106 | 1 | 0 | 0 | 0 | 0 |
| 106107 | 1 | 0 | 0 | 0 | 0 |
| 106108 | 1 | 0 | 0 | 0 | 0 |
| 106109 | 1 | 0 | 0 | 0 | 0 |
| 109125 | 1 | 0 | 0 | 0 | 0 |
| 110111 | 1 | 0 | 0 | 0 | 0 |
| 110112 | 1 | 0 | 0 | 0 | 0 |
| 110113 | 1 | 0 | 0 | 0 | 0 |
| 110122 | 1 | 0 | 0 | 0 | 0 |
| 113114 | 1 | 0 | 0 | 0 | 0 |
| 114115 | 1 | 0 | 0 | 0 | 0 |
| 114121 | 2 | 0 | 0 | 0 | 0 |
| 115116 | 1 | 0 | 0 | 0 | 0 |
| 115117 | 1 | 0 | 0 | 0 | 0 |
| 115118 | 1 | 0 | 0 | 0 | 0 |
| 118119 | 1 | 0 | 0 | 0 | 0 |
| 118120 | 1 | 0 | 0 | 0 | 0 |
| 118157 | 1 | 0 | 0 | 0 | 0 |
| 122123 | 1 | 0 | 0 | 0 | 0 |
| 122124 | 1 | 0 | 0 | 0 | 0 |
| 122143 | 1 | 0 | 0 | 0 | 0 |
| 125126 | 1 | 0 | 0 | 0 | 0 |
| 125127 | 1 | 0 | 0 | 0 | 0 |
| 125128 | 1 | 0 | 0 | 0 | 0 |
| 128129 | 1 | 0 | 0 | 0 | 0 |
| 128130 | 1 | 0 | 0 | 0 | 0 |
| 128131 | 1 | 0 | 0 | 0 | 0 |
| 131132 | 1 | 0 | 0 | 0 | 0 |
| 131139 | 2 | 0 | 0 | 0 | 0 |
| 132133 | 1 | 0 | 0 | 0 | 0 |
| 133134 | 1 | 0 | 0 | 0 | 0 |
| 133135 | 1 | 0 | 0 | 0 | 0 |
| 133136 | 1 | 0 | 0 | 0 | 0 |
| 136137 | 1 | 0 | 0 | 0 | 0 |
| 136138 | 1 | 0 | 0 | 0 | 0 |
| 136140 | 1 | 0 | 0 | 0 | 0 |
| 140141 | 1 | 0 | 0 | 0 | 0 |
| 140142 | 1 | 0 | 0 | 0 | 0 |
| 140143 | 1 | 0 | 0 | 0 | 0 |
| 143144 | 1 | 0 | 0 | 0 | 0 |
| 143145 | 1 | 0 | 0 | 0 | 0 |
| 146147 | 1 | 0 | 0 | 0 | 0 |
| 146148 | 1 | 0 | 0 | 0 | 0 |
| 148149 | 1 | 0 | 0 | 0 | 0 |
| 148150 | 1 | 0 | 0 | 0 | 0 |
| 148151 | 1 | 0 | 0 | 0 | 0 |
| 151152 | 1 | 0 | 0 | 0 | 0 |
| 151153 | 1 | 0 | 0 | 0 | 0 |
| 151154 | 1 | 0 | 0 | 0 | 0 |
| 154155 | 1 | 0 | 0 | 0 | 0 |
| 154156 | 1 | 0 | 0 | 0 | 0 |
| 154157 | 1 | 0 | 0 | 0 | 0 |
| 157173 | 1 | 0 | 0 | 0 | 0 |
| 158159 | 1 | 0 | 0 | 0 | 0 |
| 158160 | 1 | 0 | 0 | 0 | 0 |
| 158161 | 1 | 0 | 0 | 0 | 0 |
| 158170 | 1 | 0 | 0 | 0 | 0 |
| 161162 | 1 | 0 | 0 | 0 | 0 |
| 162163 | 1 | 0 | 0 | 0 | 0 |
| 162169 | 2 | 0 | 0 | 0 | 0 |
| 163164 | 1 | 0 | 0 | 0 | 0 |
| 163165 | 1 | 0 | 0 | 0 | 0 |
| 163166 | 1 | 0 | 0 | 0 | 0 |
| 166167 | 1 | 0 | 0 | 0 | 0 |
| 166168 | 1 | 0 | 0 | 0 | 0 |
| 166205 | 1 | 0 | 0 | 0 | 0 |
| 170171 | 1 | 0 | 0 | 0 | 0 |
| 170172 | 1 | 0 | 0 | 0 | 0 |
| 170191 | 1 | 0 | 0 | 0 | 0 |
| 173174 | 1 | 0 | 0 | 0 | 0 |
| 173175 | 1 | 0 | 0 | 0 | 0 |
| 173176 | 1 | 0 | 0 | 0 | 0 |

|        |   |   |   |   |   |
|--------|---|---|---|---|---|
| 176177 | 1 | 0 | 0 | 0 | 0 |
| 176178 | 1 | 0 | 0 | 0 | 0 |
| 176179 | 1 | 0 | 0 | 0 | 0 |
| 179180 | 1 | 0 | 0 | 0 | 0 |
| 179187 | 2 | 0 | 0 | 0 | 0 |
| 180181 | 1 | 0 | 0 | 0 | 0 |
| 181182 | 1 | 0 | 0 | 0 | 0 |
| 181183 | 1 | 0 | 0 | 0 | 0 |
| 181184 | 1 | 0 | 0 | 0 | 0 |
| 184185 | 1 | 0 | 0 | 0 | 0 |
| 184186 | 1 | 0 | 0 | 0 | 0 |
| 184188 | 1 | 0 | 0 | 0 | 0 |
| 188189 | 1 | 0 | 0 | 0 | 0 |
| 188190 | 1 | 0 | 0 | 0 | 0 |
| 188191 | 1 | 0 | 0 | 0 | 0 |
| 191192 | 1 | 0 | 0 | 0 | 0 |
| 191193 | 1 | 0 | 0 | 0 | 0 |
| 194195 | 1 | 0 | 0 | 0 | 0 |
| 194196 | 1 | 0 | 0 | 0 | 0 |
| 196197 | 1 | 0 | 0 | 0 | 0 |
| 196198 | 1 | 0 | 0 | 0 | 0 |
| 196199 | 1 | 0 | 0 | 0 | 0 |
| 199200 | 1 | 0 | 0 | 0 | 0 |
| 199201 | 1 | 0 | 0 | 0 | 0 |
| 199202 | 1 | 0 | 0 | 0 | 0 |
| 202203 | 1 | 0 | 0 | 0 | 0 |
| 202204 | 1 | 0 | 0 | 0 | 0 |
| 202205 | 1 | 0 | 0 | 0 | 0 |
| 205221 | 1 | 0 | 0 | 0 | 0 |
| 206207 | 1 | 0 | 0 | 0 | 0 |
| 206208 | 1 | 0 | 0 | 0 | 0 |
| 206209 | 1 | 0 | 0 | 0 | 0 |
| 206218 | 1 | 0 | 0 | 0 | 0 |
| 209210 | 1 | 0 | 0 | 0 | 0 |
| 210211 | 1 | 0 | 0 | 0 | 0 |
| 210217 | 2 | 0 | 0 | 0 | 0 |
| 211212 | 1 | 0 | 0 | 0 | 0 |
| 211213 | 1 | 0 | 0 | 0 | 0 |
| 211214 | 1 | 0 | 0 | 0 | 0 |
| 214215 | 1 | 0 | 0 | 0 | 0 |
| 214216 | 1 | 0 | 0 | 0 | 0 |
| 214253 | 1 | 0 | 0 | 0 | 0 |
| 218219 | 1 | 0 | 0 | 0 | 0 |
| 218220 | 1 | 0 | 0 | 0 | 0 |
| 218239 | 1 | 0 | 0 | 0 | 0 |
| 221222 | 1 | 0 | 0 | 0 | 0 |
| 221223 | 1 | 0 | 0 | 0 | 0 |
| 221224 | 1 | 0 | 0 | 0 | 0 |
| 224225 | 1 | 0 | 0 | 0 | 0 |
| 224226 | 1 | 0 | 0 | 0 | 0 |
| 224227 | 1 | 0 | 0 | 0 | 0 |
| 227228 | 1 | 0 | 0 | 0 | 0 |
| 227235 | 2 | 0 | 0 | 0 | 0 |
| 228229 | 1 | 0 | 0 | 0 | 0 |
| 229230 | 1 | 0 | 0 | 0 | 0 |
| 229231 | 1 | 0 | 0 | 0 | 0 |
| 229232 | 1 | 0 | 0 | 0 | 0 |
| 232233 | 1 | 0 | 0 | 0 | 0 |
| 232234 | 1 | 0 | 0 | 0 | 0 |
| 232236 | 1 | 0 | 0 | 0 | 0 |
| 236237 | 1 | 0 | 0 | 0 | 0 |
| 236238 | 1 | 0 | 0 | 0 | 0 |
| 236239 | 1 | 0 | 0 | 0 | 0 |
| 239240 | 1 | 0 | 0 | 0 | 0 |
| 239241 | 1 | 0 | 0 | 0 | 0 |
| 242243 | 1 | 0 | 0 | 0 | 0 |
| 242244 | 1 | 0 | 0 | 0 | 0 |
| 244245 | 1 | 0 | 0 | 0 | 0 |
| 244246 | 1 | 0 | 0 | 0 | 0 |
| 244247 | 1 | 0 | 0 | 0 | 0 |
| 247248 | 1 | 0 | 0 | 0 | 0 |
| 247249 | 1 | 0 | 0 | 0 | 0 |
| 247250 | 1 | 0 | 0 | 0 | 0 |
| 250251 | 1 | 0 | 0 | 0 | 0 |
| 250252 | 1 | 0 | 0 | 0 | 0 |
| 250253 | 1 | 0 | 0 | 0 | 0 |
| 253254 | 1 | 0 | 0 | 0 | 0 |

M END  
> <NAME>  
E20\_12









|         |         |          |   |   |   |   |   |   |   |   |   |   |   |   |   |
|---------|---------|----------|---|---|---|---|---|---|---|---|---|---|---|---|---|
| 67.3730 | 9.8410  | -13.9500 | H | 0 | 0 | 0 | 0 | 0 | 0 | 0 | 0 | 0 | 0 | 0 | 0 |
| 70.8800 | 11.7100 | -11.6650 | O | 0 | 0 | 0 | 0 | 0 | 0 | 0 | 0 | 0 | 0 | 0 | 0 |
| 68.7210 | 8.9980  | -15.4240 | C | 0 | 0 | 0 | 0 | 0 | 0 | 0 | 0 | 0 | 0 | 0 | 0 |
| 68.8420 | 9.9280  | -15.9930 | H | 0 | 0 | 0 | 0 | 0 | 0 | 0 | 0 | 0 | 0 | 0 | 0 |
| 69.6890 | 8.4810  | -15.4410 | H | 0 | 0 | 0 | 0 | 0 | 0 | 0 | 0 | 0 | 0 | 0 | 0 |
| 67.6610 | 8.1210  | -16.0950 | C | 0 | 0 | 0 | 0 | 0 | 0 | 0 | 0 | 0 | 0 | 0 | 0 |
| 66.6930 | 8.6370  | -16.0760 | H | 0 | 0 | 0 | 0 | 0 | 0 | 0 | 0 | 0 | 0 | 0 | 0 |
| 67.5430 | 7.1900  | -15.5270 | H | 0 | 0 | 0 | 0 | 0 | 0 | 0 | 0 | 0 | 0 | 0 | 0 |
| 67.6580 | 3.4000  | -27.9630 | O | 0 | 0 | 0 | 0 | 0 | 0 | 0 | 0 | 0 | 0 | 0 | 0 |
| 68.4950 | 2.9220  | -28.1000 | H | 0 | 0 | 0 | 0 | 0 | 0 | 0 | 0 | 0 | 0 | 0 | 0 |
| 67.4210 | 3.4190  | -26.5500 | C | 0 | 0 | 0 | 0 | 0 | 0 | 0 | 0 | 0 | 0 | 0 | 0 |
| 67.3800 | 2.3890  | -26.1840 | H | 0 | 0 | 0 | 0 | 0 | 0 | 0 | 0 | 0 | 0 | 0 | 0 |
| 68.2640 | 3.9440  | -26.0900 | H | 0 | 0 | 0 | 0 | 0 | 0 | 0 | 0 | 0 | 0 | 0 | 0 |
| 66.1020 | 4.1510  | -26.3050 | C | 0 | 0 | 3 | 0 | 0 | 0 | 0 | 0 | 0 | 0 | 0 | 0 |
| 65.3100 | 3.6540  | -26.8790 | H | 0 | 0 | 0 | 0 | 0 | 0 | 0 | 0 | 0 | 0 | 0 | 0 |
| 65.6660 | 4.2080  | -24.8280 | C | 0 | 0 | 0 | 0 | 0 | 0 | 0 | 0 | 0 | 0 | 0 | 0 |
| 64.7370 | 4.7890  | -24.7820 | H | 0 | 0 | 0 | 0 | 0 | 0 | 0 | 0 | 0 | 0 | 0 | 0 |
| 65.4460 | 3.1900  | -24.4850 | H | 0 | 0 | 0 | 0 | 0 | 0 | 0 | 0 | 0 | 0 | 0 | 0 |
| 66.6500 | 4.8230  | -23.9230 | N | 0 | 0 | 3 | 0 | 0 | 0 | 0 | 0 | 0 | 0 | 0 | 0 |
| 67.5000 | 4.2640  | -23.8910 | H | 0 | 0 | 0 | 0 | 0 | 0 | 0 | 0 | 0 | 0 | 0 | 0 |
| 66.2040 | 5.4720  | -26.8520 | O | 0 | 0 | 0 | 0 | 0 | 0 | 0 | 0 | 0 | 0 | 0 | 0 |
| 66.6560 | 5.3500  | -27.7100 | H | 0 | 0 | 0 | 0 | 0 | 0 | 0 | 0 | 0 | 0 | 0 | 0 |
| 1       | 2       | 1        | 0 | 0 | 0 | 0 |   |   |   |   |   |   |   |   |   |
| 1       | 3       | 1        | 0 | 0 | 0 | 0 |   |   |   |   |   |   |   |   |   |
| 3       | 4       | 1        | 0 | 0 | 0 | 0 |   |   |   |   |   |   |   |   |   |
| 3       | 5       | 1        | 0 | 0 | 0 | 0 |   |   |   |   |   |   |   |   |   |
| 3       | 6       | 1        | 0 | 0 | 0 | 0 |   |   |   |   |   |   |   |   |   |
| 6       | 7       | 1        | 0 | 0 | 0 | 0 |   |   |   |   |   |   |   |   |   |
| 6       | 8       | 1        | 0 | 0 | 0 | 0 |   |   |   |   |   |   |   |   |   |
| 6       | 13      | 1        | 0 | 0 | 0 | 0 |   |   |   |   |   |   |   |   |   |
| 8       | 9       | 1        | 0 | 0 | 0 | 0 |   |   |   |   |   |   |   |   |   |
| 8       | 10      | 1        | 0 | 0 | 0 | 0 |   |   |   |   |   |   |   |   |   |
| 8       | 11      | 1        | 0 | 0 | 0 | 0 |   |   |   |   |   |   |   |   |   |
| 11      | 12      | 1        | 0 | 0 | 0 | 0 |   |   |   |   |   |   |   |   |   |
| 11      | 30      | 1        | 0 | 0 | 0 | 0 |   |   |   |   |   |   |   |   |   |
| 13      | 14      | 1        | 0 | 0 | 0 | 0 |   |   |   |   |   |   |   |   |   |
| 15      | 16      | 1        | 0 | 0 | 0 | 0 |   |   |   |   |   |   |   |   |   |
| 15      | 17      | 1        | 0 | 0 | 0 | 0 |   |   |   |   |   |   |   |   |   |
| 15      | 18      | 1        | 0 | 0 | 0 | 0 |   |   |   |   |   |   |   |   |   |
| 15      | 27      | 1        | 0 | 0 | 0 | 0 |   |   |   |   |   |   |   |   |   |
| 18      | 19      | 1        | 0 | 0 | 0 | 0 |   |   |   |   |   |   |   |   |   |
| 19      | 20      | 1        | 0 | 0 | 0 | 0 |   |   |   |   |   |   |   |   |   |
| 19      | 26      | 2        | 0 | 0 | 0 | 0 |   |   |   |   |   |   |   |   |   |
| 20      | 21      | 1        | 0 | 0 | 0 | 0 |   |   |   |   |   |   |   |   |   |
| 20      | 22      | 1        | 0 | 0 | 0 | 0 |   |   |   |   |   |   |   |   |   |
| 20      | 23      | 1        | 0 | 0 | 0 | 0 |   |   |   |   |   |   |   |   |   |
| 23      | 24      | 1        | 0 | 0 | 0 | 0 |   |   |   |   |   |   |   |   |   |
| 23      | 25      | 1        | 0 | 0 | 0 | 0 |   |   |   |   |   |   |   |   |   |
| 23      | 61      | 1        | 0 | 0 | 0 | 0 |   |   |   |   |   |   |   |   |   |
| 27      | 28      | 1        | 0 | 0 | 0 | 0 |   |   |   |   |   |   |   |   |   |
| 27      | 29      | 1        | 0 | 0 | 0 | 0 |   |   |   |   |   |   |   |   |   |
| 27      | 48      | 1        | 0 | 0 | 0 | 0 |   |   |   |   |   |   |   |   |   |
| 30      | 31      | 1        | 0 | 0 | 0 | 0 |   |   |   |   |   |   |   |   |   |
| 30      | 32      | 1        | 0 | 0 | 0 | 0 |   |   |   |   |   |   |   |   |   |
| 30      | 33      | 1        | 0 | 0 | 0 | 0 |   |   |   |   |   |   |   |   |   |
| 33      | 34      | 1        | 0 | 0 | 0 | 0 |   |   |   |   |   |   |   |   |   |
| 33      | 35      | 1        | 0 | 0 | 0 | 0 |   |   |   |   |   |   |   |   |   |
| 33      | 36      | 1        | 0 | 0 | 0 | 0 |   |   |   |   |   |   |   |   |   |
| 36      | 37      | 1        | 0 | 0 | 0 | 0 |   |   |   |   |   |   |   |   |   |
| 36      | 44      | 2        | 0 | 0 | 0 | 0 |   |   |   |   |   |   |   |   |   |
| 37      | 38      | 1        | 0 | 0 | 0 | 0 |   |   |   |   |   |   |   |   |   |
| 38      | 39      | 1        | 0 | 0 | 0 | 0 |   |   |   |   |   |   |   |   |   |
| 38      | 40      | 1        | 0 | 0 | 0 | 0 |   |   |   |   |   |   |   |   |   |
| 38      | 41      | 1        | 0 | 0 | 0 | 0 |   |   |   |   |   |   |   |   |   |
| 41      | 42      | 1        | 0 | 0 | 0 | 0 |   |   |   |   |   |   |   |   |   |
| 41      | 43      | 1        | 0 | 0 | 0 | 0 |   |   |   |   |   |   |   |   |   |
| 41      | 45      | 1        | 0 | 0 | 0 | 0 |   |   |   |   |   |   |   |   |   |
| 45      | 46      | 1        | 0 | 0 | 0 | 0 |   |   |   |   |   |   |   |   |   |
| 45      | 47      | 1        | 0 | 0 | 0 | 0 |   |   |   |   |   |   |   |   |   |
| 45      | 48      | 1        | 0 | 0 | 0 | 0 |   |   |   |   |   |   |   |   |   |
| 48      | 49      | 1        | 0 | 0 | 0 | 0 |   |   |   |   |   |   |   |   |   |
| 48      | 50      | 1        | 0 | 0 | 0 | 0 |   |   |   |   |   |   |   |   |   |
| 51      | 52      | 1        | 0 | 0 | 0 | 0 |   |   |   |   |   |   |   |   |   |
| 51      | 53      | 1        | 0 | 0 | 0 | 0 |   |   |   |   |   |   |   |   |   |
| 53      | 54      | 1        | 0 | 0 | 0 | 0 |   |   |   |   |   |   |   |   |   |
| 53      | 55      | 1        | 0 | 0 | 0 | 0 |   |   |   |   |   |   |   |   |   |
| 53      | 56      | 1        | 0 | 0 | 0 | 0 |   |   |   |   |   |   |   |   |   |
| 56      | 57      | 1        | 0 | 0 | 0 | 0 |   |   |   |   |   |   |   |   |   |
| 56      | 58      | 1        | 0 | 0 | 0 | 0 |   |   |   |   |   |   |   |   |   |
| 56      | 62      | 1        | 0 | 0 | 0 | 0 |   |   |   |   |   |   |   |   |   |
| 58      | 59      | 1        | 0 | 0 | 0 | 0 |   |   |   |   |   |   |   |   |   |

|     |     |   |   |   |   |   |
|-----|-----|---|---|---|---|---|
| 58  | 60  | 1 | 0 | 0 | 0 | 0 |
| 58  | 61  | 1 | 0 | 0 | 0 | 0 |
| 61  | 79  | 1 | 0 | 0 | 0 | 0 |
| 62  | 63  | 1 | 0 | 0 | 0 | 0 |
| 64  | 65  | 1 | 0 | 0 | 0 | 0 |
| 64  | 66  | 1 | 0 | 0 | 0 | 0 |
| 64  | 67  | 1 | 0 | 0 | 0 | 0 |
| 64  | 76  | 1 | 0 | 0 | 0 | 0 |
| 67  | 68  | 1 | 0 | 0 | 0 | 0 |
| 68  | 69  | 1 | 0 | 0 | 0 | 0 |
| 68  | 75  | 2 | 0 | 0 | 0 | 0 |
| 69  | 70  | 1 | 0 | 0 | 0 | 0 |
| 69  | 71  | 1 | 0 | 0 | 0 | 0 |
| 69  | 72  | 1 | 0 | 0 | 0 | 0 |
| 72  | 73  | 1 | 0 | 0 | 0 | 0 |
| 72  | 74  | 1 | 0 | 0 | 0 | 0 |
| 72  | 110 | 1 | 0 | 0 | 0 | 0 |
| 76  | 77  | 1 | 0 | 0 | 0 | 0 |
| 76  | 78  | 1 | 0 | 0 | 0 | 0 |
| 76  | 97  | 1 | 0 | 0 | 0 | 0 |
| 79  | 80  | 1 | 0 | 0 | 0 | 0 |
| 79  | 81  | 1 | 0 | 0 | 0 | 0 |
| 79  | 82  | 1 | 0 | 0 | 0 | 0 |
| 82  | 83  | 1 | 0 | 0 | 0 | 0 |
| 82  | 84  | 1 | 0 | 0 | 0 | 0 |
| 82  | 85  | 1 | 0 | 0 | 0 | 0 |
| 85  | 86  | 1 | 0 | 0 | 0 | 0 |
| 85  | 93  | 2 | 0 | 0 | 0 | 0 |
| 86  | 87  | 1 | 0 | 0 | 0 | 0 |
| 87  | 88  | 1 | 0 | 0 | 0 | 0 |
| 87  | 89  | 1 | 0 | 0 | 0 | 0 |
| 87  | 90  | 1 | 0 | 0 | 0 | 0 |
| 90  | 91  | 1 | 0 | 0 | 0 | 0 |
| 90  | 92  | 1 | 0 | 0 | 0 | 0 |
| 90  | 94  | 1 | 0 | 0 | 0 | 0 |
| 94  | 95  | 1 | 0 | 0 | 0 | 0 |
| 94  | 96  | 1 | 0 | 0 | 0 | 0 |
| 94  | 97  | 1 | 0 | 0 | 0 | 0 |
| 97  | 98  | 1 | 0 | 0 | 0 | 0 |
| 97  | 99  | 1 | 0 | 0 | 0 | 0 |
| 100 | 101 | 1 | 0 | 0 | 0 | 0 |
| 100 | 102 | 1 | 0 | 0 | 0 | 0 |
| 102 | 103 | 1 | 0 | 0 | 0 | 0 |
| 102 | 104 | 1 | 0 | 0 | 0 | 0 |
| 102 | 105 | 1 | 0 | 0 | 0 | 0 |
| 105 | 106 | 1 | 0 | 0 | 0 | 0 |
| 105 | 107 | 1 | 0 | 0 | 0 | 0 |
| 105 | 111 | 1 | 0 | 0 | 0 | 0 |
| 107 | 108 | 1 | 0 | 0 | 0 | 0 |
| 107 | 109 | 1 | 0 | 0 | 0 | 0 |
| 107 | 110 | 1 | 0 | 0 | 0 | 0 |
| 110 | 128 | 1 | 0 | 0 | 0 | 0 |
| 111 | 112 | 1 | 0 | 0 | 0 | 0 |
| 113 | 114 | 1 | 0 | 0 | 0 | 0 |
| 113 | 115 | 1 | 0 | 0 | 0 | 0 |
| 113 | 116 | 1 | 0 | 0 | 0 | 0 |
| 113 | 125 | 1 | 0 | 0 | 0 | 0 |
| 116 | 117 | 1 | 0 | 0 | 0 | 0 |
| 117 | 118 | 1 | 0 | 0 | 0 | 0 |
| 117 | 124 | 2 | 0 | 0 | 0 | 0 |
| 118 | 119 | 1 | 0 | 0 | 0 | 0 |
| 118 | 120 | 1 | 0 | 0 | 0 | 0 |
| 118 | 121 | 1 | 0 | 0 | 0 | 0 |
| 121 | 122 | 1 | 0 | 0 | 0 | 0 |
| 121 | 123 | 1 | 0 | 0 | 0 | 0 |
| 121 | 159 | 1 | 0 | 0 | 0 | 0 |
| 125 | 126 | 1 | 0 | 0 | 0 | 0 |
| 125 | 127 | 1 | 0 | 0 | 0 | 0 |
| 125 | 146 | 1 | 0 | 0 | 0 | 0 |
| 128 | 129 | 1 | 0 | 0 | 0 | 0 |
| 128 | 130 | 1 | 0 | 0 | 0 | 0 |
| 128 | 131 | 1 | 0 | 0 | 0 | 0 |
| 131 | 132 | 1 | 0 | 0 | 0 | 0 |
| 131 | 133 | 1 | 0 | 0 | 0 | 0 |
| 131 | 134 | 1 | 0 | 0 | 0 | 0 |
| 134 | 135 | 1 | 0 | 0 | 0 | 0 |
| 134 | 142 | 2 | 0 | 0 | 0 | 0 |
| 135 | 136 | 1 | 0 | 0 | 0 | 0 |
| 136 | 137 | 1 | 0 | 0 | 0 | 0 |
| 136 | 138 | 1 | 0 | 0 | 0 | 0 |
| 136 | 139 | 1 | 0 | 0 | 0 | 0 |

|        |   |   |   |   |   |
|--------|---|---|---|---|---|
| 139140 | 1 | 0 | 0 | 0 | 0 |
| 139141 | 1 | 0 | 0 | 0 | 0 |
| 139143 | 1 | 0 | 0 | 0 | 0 |
| 143144 | 1 | 0 | 0 | 0 | 0 |
| 143145 | 1 | 0 | 0 | 0 | 0 |
| 143146 | 1 | 0 | 0 | 0 | 0 |
| 146147 | 1 | 0 | 0 | 0 | 0 |
| 146148 | 1 | 0 | 0 | 0 | 0 |
| 149150 | 1 | 0 | 0 | 0 | 0 |
| 149151 | 1 | 0 | 0 | 0 | 0 |
| 151152 | 1 | 0 | 0 | 0 | 0 |
| 151153 | 1 | 0 | 0 | 0 | 0 |
| 151154 | 1 | 0 | 0 | 0 | 0 |
| 154155 | 1 | 0 | 0 | 0 | 0 |
| 154156 | 1 | 0 | 0 | 0 | 0 |
| 154160 | 1 | 0 | 0 | 0 | 0 |
| 156157 | 1 | 0 | 0 | 0 | 0 |
| 156158 | 1 | 0 | 0 | 0 | 0 |
| 156159 | 1 | 0 | 0 | 0 | 0 |
| 159177 | 1 | 0 | 0 | 0 | 0 |
| 160161 | 1 | 0 | 0 | 0 | 0 |
| 162163 | 1 | 0 | 0 | 0 | 0 |
| 162164 | 1 | 0 | 0 | 0 | 0 |
| 162165 | 1 | 0 | 0 | 0 | 0 |
| 162174 | 1 | 0 | 0 | 0 | 0 |
| 165166 | 1 | 0 | 0 | 0 | 0 |
| 166167 | 1 | 0 | 0 | 0 | 0 |
| 166173 | 2 | 0 | 0 | 0 | 0 |
| 167168 | 1 | 0 | 0 | 0 | 0 |
| 167169 | 1 | 0 | 0 | 0 | 0 |
| 167170 | 1 | 0 | 0 | 0 | 0 |
| 170171 | 1 | 0 | 0 | 0 | 0 |
| 170172 | 1 | 0 | 0 | 0 | 0 |
| 170208 | 1 | 0 | 0 | 0 | 0 |
| 174175 | 1 | 0 | 0 | 0 | 0 |
| 174176 | 1 | 0 | 0 | 0 | 0 |
| 174195 | 1 | 0 | 0 | 0 | 0 |
| 177178 | 1 | 0 | 0 | 0 | 0 |
| 177179 | 1 | 0 | 0 | 0 | 0 |
| 177180 | 1 | 0 | 0 | 0 | 0 |
| 180181 | 1 | 0 | 0 | 0 | 0 |
| 180182 | 1 | 0 | 0 | 0 | 0 |
| 180183 | 1 | 0 | 0 | 0 | 0 |
| 183184 | 1 | 0 | 0 | 0 | 0 |
| 183191 | 2 | 0 | 0 | 0 | 0 |
| 184185 | 1 | 0 | 0 | 0 | 0 |
| 185186 | 1 | 0 | 0 | 0 | 0 |
| 185187 | 1 | 0 | 0 | 0 | 0 |
| 185188 | 1 | 0 | 0 | 0 | 0 |
| 188189 | 1 | 0 | 0 | 0 | 0 |
| 188190 | 1 | 0 | 0 | 0 | 0 |
| 188192 | 1 | 0 | 0 | 0 | 0 |
| 192193 | 1 | 0 | 0 | 0 | 0 |
| 192194 | 1 | 0 | 0 | 0 | 0 |
| 192195 | 1 | 0 | 0 | 0 | 0 |
| 195196 | 1 | 0 | 0 | 0 | 0 |
| 195197 | 1 | 0 | 0 | 0 | 0 |
| 198199 | 1 | 0 | 0 | 0 | 0 |
| 198200 | 1 | 0 | 0 | 0 | 0 |
| 200201 | 1 | 0 | 0 | 0 | 0 |
| 200202 | 1 | 0 | 0 | 0 | 0 |
| 200203 | 1 | 0 | 0 | 0 | 0 |
| 203204 | 1 | 0 | 0 | 0 | 0 |
| 203205 | 1 | 0 | 0 | 0 | 0 |
| 203209 | 1 | 0 | 0 | 0 | 0 |
| 205206 | 1 | 0 | 0 | 0 | 0 |
| 205207 | 1 | 0 | 0 | 0 | 0 |
| 205208 | 1 | 0 | 0 | 0 | 0 |
| 208226 | 1 | 0 | 0 | 0 | 0 |
| 209210 | 1 | 0 | 0 | 0 | 0 |
| 211212 | 1 | 0 | 0 | 0 | 0 |
| 211213 | 1 | 0 | 0 | 0 | 0 |
| 211214 | 1 | 0 | 0 | 0 | 0 |
| 211223 | 1 | 0 | 0 | 0 | 0 |
| 214215 | 1 | 0 | 0 | 0 | 0 |
| 215216 | 1 | 0 | 0 | 0 | 0 |
| 215222 | 2 | 0 | 0 | 0 | 0 |
| 216217 | 1 | 0 | 0 | 0 | 0 |
| 216218 | 1 | 0 | 0 | 0 | 0 |
| 216219 | 1 | 0 | 0 | 0 | 0 |
| 219220 | 1 | 0 | 0 | 0 | 0 |

```

219221 1 0 0 0 0
219257 1 0 0 0 0
223224 1 0 0 0 0
223225 1 0 0 0 0
223244 1 0 0 0 0
226227 1 0 0 0 0
226228 1 0 0 0 0
226229 1 0 0 0 0
229230 1 0 0 0 0
229231 1 0 0 0 0
229232 1 0 0 0 0
232233 1 0 0 0 0
232240 2 0 0 0 0
233234 1 0 0 0 0
234235 1 0 0 0 0
234236 1 0 0 0 0
234237 1 0 0 0 0
237238 1 0 0 0 0
237239 1 0 0 0 0
237241 1 0 0 0 0
241242 1 0 0 0 0
241243 1 0 0 0 0
241244 1 0 0 0 0
244245 1 0 0 0 0
244246 1 0 0 0 0
247248 1 0 0 0 0
247249 1 0 0 0 0
249250 1 0 0 0 0
249251 1 0 0 0 0
249252 1 0 0 0 0
252253 1 0 0 0 0
252254 1 0 0 0 0
252259 1 0 0 0 0
254255 1 0 0 0 0
254256 1 0 0 0 0
254257 1 0 0 0 0
257258 1 0 0 0 0
259260 1 0 0 0 0

```

```

M END
> <NAME>
E24_12

```

```

$$$$
E28_12
MOE2012 3D

```

```

272271 0 0 1 0 0 0 0 0999 V2000
13.2130 9.6500 29.9930 O 0 0 0 0 0 0 0 0 0 0 0 0 0 0 0 0
13.1520 9.3730 30.9230 H 0 0 0 0 0 0 0 0 0 0 0 0 0 0 0 0
14.0410 8.7040 29.3300 C 0 0 0 0 0 0 0 0 0 0 0 0 0 0 0 0
15.0230 8.7020 29.8140 H 0 0 0 0 0 0 0 0 0 0 0 0 0 0 0 0
13.5900 7.7120 29.4340 H 0 0 0 0 0 0 0 0 0 0 0 0 0 0 0 0
14.1580 9.0980 27.8650 C 0 0 0 0 0 0 0 0 0 0 0 0 0 0 0 0
13.1550 9.1400 27.4200 H 0 0 0 0 0 0 0 0 0 0 0 0 0 0 0 0
14.5600 10.1160 27.7930 H 0 0 0 0 0 0 0 0 0 0 0 0 0 0 0 0
15.0420 8.1250 27.0870 C 0 0 0 0 0 0 0 0 0 0 0 0 0 0 0 0
16.0420 8.1010 27.5370 H 0 0 0 0 0 0 0 0 0 0 0 0 0 0 0 0
14.6270 7.1120 27.1660 H 0 0 0 0 0 0 0 0 0 0 0 0 0 0 0 0
15.1430 8.5290 25.6140 C 0 0 0 0 0 0 0 0 0 0 0 0 0 0 0 0
14.1390 8.5450 25.1730 H 0 0 0 0 0 0 0 0 0 0 0 0 0 0 0 0
15.5640 9.5390 25.5390 H 0 0 0 0 0 0 0 0 0 0 0 0 0 0 0 0
15.9890 7.5730 24.8970 N 0 0 0 3 0 0 0 0 0 0 0 0 0 0 0 0
16.9140 7.5510 25.3250 H 0 0 0 0 0 0 0 0 0 0 0 0 0 0 0 0
20.7140 3.2700 14.4820 C 0 0 0 0 0 0 0 0 0 0 0 0 0 0 0 0
20.1650 2.3390 14.6670 H 0 0 0 0 0 0 0 0 0 0 0 0 0 0 0 0
21.7130 3.2030 14.9290 H 0 0 0 0 0 0 0 0 0 0 0 0 0 0 0 0
20.8420 3.4790 13.0670 O 0 0 0 0 0 0 0 0 0 0 0 0 0 0 0 0
21.4320 2.4510 12.3890 C 0 0 0 0 0 0 0 0 0 0 0 0 0 0 0 0
21.4870 2.7750 10.9160 C 0 0 0 0 0 0 0 0 0 0 0 0 0 0 0 0
20.4920 3.1180 10.6180 H 0 0 0 0 0 0 0 0 0 0 0 0 0 0 0 0
22.2020 3.5930 10.7710 H 0 0 0 0 0 0 0 0 0 0 0 0 0 0 0 0
21.9180 1.5470 10.1020 C 0 0 0 0 0 0 0 0 0 0 0 0 0 0 0 0
22.9190 1.2680 10.4510 H 0 0 0 0 0 0 0 0 0 0 0 0 0 0 0 0
21.2710 0.6870 10.3230 H 0 0 0 0 0 0 0 0 0 0 0 0 0 0 0 0
21.8600 1.4260 12.9010 O 0 0 0 0 0 0 0 0 0 0 0 0 0 0 0 0
19.9510 4.4520 15.0710 C 0 0 0 0 0 0 0 0 0 0 0 0 0 0 0 0
20.4930 5.3800 14.8510 H 0 0 0 0 0 0 0 0 0 0 0 0 0 0 0 0
18.9810 4.5440 14.5650 H 0 0 0 0 0 0 0 0 0 0 0 0 0 0 0 0
16.1050 7.9360 23.4820 C 0 0 0 0 0 0 0 0 0 0 0 0 0 0 0 0
15.1090 7.9720 23.0230 H 0 0 0 0 0 0 0 0 0 0 0 0 0 0 0 0
16.5530 8.9320 23.3830 H 0 0 0 0 0 0 0 0 0 0 0 0 0 0 0 0

```









|    |     |   |   |   |   |   |
|----|-----|---|---|---|---|---|
| 6  | 7   | 1 | 0 | 0 | 0 | 0 |
| 6  | 8   | 1 | 0 | 0 | 0 | 0 |
| 6  | 9   | 1 | 0 | 0 | 0 | 0 |
| 9  | 10  | 1 | 0 | 0 | 0 | 0 |
| 9  | 11  | 1 | 0 | 0 | 0 | 0 |
| 9  | 12  | 1 | 0 | 0 | 0 | 0 |
| 12 | 13  | 1 | 0 | 0 | 0 | 0 |
| 12 | 14  | 1 | 0 | 0 | 0 | 0 |
| 12 | 15  | 1 | 0 | 0 | 0 | 0 |
| 15 | 16  | 1 | 0 | 0 | 0 | 0 |
| 15 | 32  | 1 | 0 | 0 | 0 | 0 |
| 17 | 18  | 1 | 0 | 0 | 0 | 0 |
| 17 | 19  | 1 | 0 | 0 | 0 | 0 |
| 17 | 20  | 1 | 0 | 0 | 0 | 0 |
| 17 | 29  | 1 | 0 | 0 | 0 | 0 |
| 20 | 21  | 1 | 0 | 0 | 0 | 0 |
| 21 | 22  | 1 | 0 | 0 | 0 | 0 |
| 21 | 28  | 2 | 0 | 0 | 0 | 0 |
| 22 | 23  | 1 | 0 | 0 | 0 | 0 |
| 22 | 24  | 1 | 0 | 0 | 0 | 0 |
| 22 | 25  | 1 | 0 | 0 | 0 | 0 |
| 25 | 26  | 1 | 0 | 0 | 0 | 0 |
| 25 | 27  | 1 | 0 | 0 | 0 | 0 |
| 25 | 67  | 1 | 0 | 0 | 0 | 0 |
| 29 | 30  | 1 | 0 | 0 | 0 | 0 |
| 29 | 31  | 1 | 0 | 0 | 0 | 0 |
| 29 | 50  | 1 | 0 | 0 | 0 | 0 |
| 32 | 33  | 1 | 0 | 0 | 0 | 0 |
| 32 | 34  | 1 | 0 | 0 | 0 | 0 |
| 32 | 35  | 1 | 0 | 0 | 0 | 0 |
| 35 | 36  | 1 | 0 | 0 | 0 | 0 |
| 35 | 37  | 1 | 0 | 0 | 0 | 0 |
| 35 | 38  | 1 | 0 | 0 | 0 | 0 |
| 38 | 39  | 1 | 0 | 0 | 0 | 0 |
| 38 | 46  | 2 | 0 | 0 | 0 | 0 |
| 39 | 40  | 1 | 0 | 0 | 0 | 0 |
| 40 | 41  | 1 | 0 | 0 | 0 | 0 |
| 40 | 42  | 1 | 0 | 0 | 0 | 0 |
| 40 | 43  | 1 | 0 | 0 | 0 | 0 |
| 43 | 44  | 1 | 0 | 0 | 0 | 0 |
| 43 | 45  | 1 | 0 | 0 | 0 | 0 |
| 43 | 47  | 1 | 0 | 0 | 0 | 0 |
| 47 | 48  | 1 | 0 | 0 | 0 | 0 |
| 47 | 49  | 1 | 0 | 0 | 0 | 0 |
| 47 | 50  | 1 | 0 | 0 | 0 | 0 |
| 50 | 51  | 1 | 0 | 0 | 0 | 0 |
| 50 | 52  | 1 | 0 | 0 | 0 | 0 |
| 53 | 54  | 1 | 0 | 0 | 0 | 0 |
| 53 | 55  | 1 | 0 | 0 | 0 | 0 |
| 55 | 56  | 1 | 0 | 0 | 0 | 0 |
| 55 | 57  | 1 | 0 | 0 | 0 | 0 |
| 55 | 58  | 1 | 0 | 0 | 0 | 0 |
| 58 | 59  | 1 | 0 | 0 | 0 | 0 |
| 58 | 60  | 1 | 0 | 0 | 0 | 0 |
| 58 | 61  | 1 | 0 | 0 | 0 | 0 |
| 61 | 62  | 1 | 0 | 0 | 0 | 0 |
| 61 | 63  | 1 | 0 | 0 | 0 | 0 |
| 61 | 64  | 1 | 0 | 0 | 0 | 0 |
| 64 | 65  | 1 | 0 | 0 | 0 | 0 |
| 64 | 66  | 1 | 0 | 0 | 0 | 0 |
| 64 | 67  | 1 | 0 | 0 | 0 | 0 |
| 67 | 83  | 1 | 0 | 0 | 0 | 0 |
| 68 | 69  | 1 | 0 | 0 | 0 | 0 |
| 68 | 70  | 1 | 0 | 0 | 0 | 0 |
| 68 | 71  | 1 | 0 | 0 | 0 | 0 |
| 68 | 80  | 1 | 0 | 0 | 0 | 0 |
| 71 | 72  | 1 | 0 | 0 | 0 | 0 |
| 72 | 73  | 1 | 0 | 0 | 0 | 0 |
| 72 | 79  | 2 | 0 | 0 | 0 | 0 |
| 73 | 74  | 1 | 0 | 0 | 0 | 0 |
| 73 | 75  | 1 | 0 | 0 | 0 | 0 |
| 73 | 76  | 1 | 0 | 0 | 0 | 0 |
| 76 | 77  | 1 | 0 | 0 | 0 | 0 |
| 76 | 78  | 1 | 0 | 0 | 0 | 0 |
| 76 | 118 | 1 | 0 | 0 | 0 | 0 |
| 80 | 81  | 1 | 0 | 0 | 0 | 0 |
| 80 | 82  | 1 | 0 | 0 | 0 | 0 |
| 80 | 101 | 1 | 0 | 0 | 0 | 0 |
| 83 | 84  | 1 | 0 | 0 | 0 | 0 |
| 83 | 85  | 1 | 0 | 0 | 0 | 0 |
| 83 | 86  | 1 | 0 | 0 | 0 | 0 |

|     |     |   |   |   |   |   |
|-----|-----|---|---|---|---|---|
| 86  | 87  | 1 | 0 | 0 | 0 | 0 |
| 86  | 88  | 1 | 0 | 0 | 0 | 0 |
| 86  | 89  | 1 | 0 | 0 | 0 | 0 |
| 89  | 90  | 1 | 0 | 0 | 0 | 0 |
| 89  | 97  | 2 | 0 | 0 | 0 | 0 |
| 90  | 91  | 1 | 0 | 0 | 0 | 0 |
| 91  | 92  | 1 | 0 | 0 | 0 | 0 |
| 91  | 93  | 1 | 0 | 0 | 0 | 0 |
| 91  | 94  | 1 | 0 | 0 | 0 | 0 |
| 94  | 95  | 1 | 0 | 0 | 0 | 0 |
| 94  | 96  | 1 | 0 | 0 | 0 | 0 |
| 94  | 98  | 1 | 0 | 0 | 0 | 0 |
| 98  | 99  | 1 | 0 | 0 | 0 | 0 |
| 98  | 100 | 1 | 0 | 0 | 0 | 0 |
| 98  | 101 | 1 | 0 | 0 | 0 | 0 |
| 101 | 102 | 1 | 0 | 0 | 0 | 0 |
| 101 | 103 | 1 | 0 | 0 | 0 | 0 |
| 104 | 105 | 1 | 0 | 0 | 0 | 0 |
| 104 | 106 | 1 | 0 | 0 | 0 | 0 |
| 106 | 107 | 1 | 0 | 0 | 0 | 0 |
| 106 | 108 | 1 | 0 | 0 | 0 | 0 |
| 106 | 109 | 1 | 0 | 0 | 0 | 0 |
| 109 | 110 | 1 | 0 | 0 | 0 | 0 |
| 109 | 111 | 1 | 0 | 0 | 0 | 0 |
| 109 | 112 | 1 | 0 | 0 | 0 | 0 |
| 112 | 113 | 1 | 0 | 0 | 0 | 0 |
| 112 | 114 | 1 | 0 | 0 | 0 | 0 |
| 112 | 115 | 1 | 0 | 0 | 0 | 0 |
| 115 | 116 | 1 | 0 | 0 | 0 | 0 |
| 115 | 117 | 1 | 0 | 0 | 0 | 0 |
| 115 | 118 | 1 | 0 | 0 | 0 | 0 |
| 118 | 134 | 1 | 0 | 0 | 0 | 0 |
| 119 | 120 | 1 | 0 | 0 | 0 | 0 |
| 119 | 121 | 1 | 0 | 0 | 0 | 0 |
| 119 | 122 | 1 | 0 | 0 | 0 | 0 |
| 119 | 131 | 1 | 0 | 0 | 0 | 0 |
| 122 | 123 | 1 | 0 | 0 | 0 | 0 |
| 123 | 124 | 1 | 0 | 0 | 0 | 0 |
| 123 | 130 | 2 | 0 | 0 | 0 | 0 |
| 124 | 125 | 1 | 0 | 0 | 0 | 0 |
| 124 | 126 | 1 | 0 | 0 | 0 | 0 |
| 124 | 127 | 1 | 0 | 0 | 0 | 0 |
| 127 | 128 | 1 | 0 | 0 | 0 | 0 |
| 127 | 129 | 1 | 0 | 0 | 0 | 0 |
| 127 | 169 | 1 | 0 | 0 | 0 | 0 |
| 131 | 132 | 1 | 0 | 0 | 0 | 0 |
| 131 | 133 | 1 | 0 | 0 | 0 | 0 |
| 131 | 152 | 1 | 0 | 0 | 0 | 0 |
| 134 | 135 | 1 | 0 | 0 | 0 | 0 |
| 134 | 136 | 1 | 0 | 0 | 0 | 0 |
| 134 | 137 | 1 | 0 | 0 | 0 | 0 |
| 137 | 138 | 1 | 0 | 0 | 0 | 0 |
| 137 | 139 | 1 | 0 | 0 | 0 | 0 |
| 137 | 140 | 1 | 0 | 0 | 0 | 0 |
| 140 | 141 | 1 | 0 | 0 | 0 | 0 |
| 140 | 148 | 2 | 0 | 0 | 0 | 0 |
| 141 | 142 | 1 | 0 | 0 | 0 | 0 |
| 142 | 143 | 1 | 0 | 0 | 0 | 0 |
| 142 | 144 | 1 | 0 | 0 | 0 | 0 |
| 142 | 145 | 1 | 0 | 0 | 0 | 0 |
| 145 | 146 | 1 | 0 | 0 | 0 | 0 |
| 145 | 147 | 1 | 0 | 0 | 0 | 0 |
| 145 | 149 | 1 | 0 | 0 | 0 | 0 |
| 149 | 150 | 1 | 0 | 0 | 0 | 0 |
| 149 | 151 | 1 | 0 | 0 | 0 | 0 |
| 149 | 152 | 1 | 0 | 0 | 0 | 0 |
| 152 | 153 | 1 | 0 | 0 | 0 | 0 |
| 152 | 154 | 1 | 0 | 0 | 0 | 0 |
| 155 | 156 | 1 | 0 | 0 | 0 | 0 |
| 155 | 157 | 1 | 0 | 0 | 0 | 0 |
| 157 | 158 | 1 | 0 | 0 | 0 | 0 |
| 157 | 159 | 1 | 0 | 0 | 0 | 0 |
| 157 | 160 | 1 | 0 | 0 | 0 | 0 |
| 160 | 161 | 1 | 0 | 0 | 0 | 0 |
| 160 | 162 | 1 | 0 | 0 | 0 | 0 |
| 160 | 163 | 1 | 0 | 0 | 0 | 0 |
| 163 | 164 | 1 | 0 | 0 | 0 | 0 |
| 163 | 165 | 1 | 0 | 0 | 0 | 0 |
| 163 | 166 | 1 | 0 | 0 | 0 | 0 |
| 166 | 167 | 1 | 0 | 0 | 0 | 0 |
| 166 | 168 | 1 | 0 | 0 | 0 | 0 |

|        |   |   |   |   |   |
|--------|---|---|---|---|---|
| 166169 | 1 | 0 | 0 | 0 | 0 |
| 169185 | 1 | 0 | 0 | 0 | 0 |
| 170171 | 1 | 0 | 0 | 0 | 0 |
| 170172 | 1 | 0 | 0 | 0 | 0 |
| 170173 | 1 | 0 | 0 | 0 | 0 |
| 170182 | 1 | 0 | 0 | 0 | 0 |
| 173174 | 1 | 0 | 0 | 0 | 0 |
| 174175 | 1 | 0 | 0 | 0 | 0 |
| 174181 | 2 | 0 | 0 | 0 | 0 |
| 175176 | 1 | 0 | 0 | 0 | 0 |
| 175177 | 1 | 0 | 0 | 0 | 0 |
| 175178 | 1 | 0 | 0 | 0 | 0 |
| 178179 | 1 | 0 | 0 | 0 | 0 |
| 178180 | 1 | 0 | 0 | 0 | 0 |
| 178220 | 1 | 0 | 0 | 0 | 0 |
| 182183 | 1 | 0 | 0 | 0 | 0 |
| 182184 | 1 | 0 | 0 | 0 | 0 |
| 182203 | 1 | 0 | 0 | 0 | 0 |
| 185186 | 1 | 0 | 0 | 0 | 0 |
| 185187 | 1 | 0 | 0 | 0 | 0 |
| 185188 | 1 | 0 | 0 | 0 | 0 |
| 188189 | 1 | 0 | 0 | 0 | 0 |
| 188190 | 1 | 0 | 0 | 0 | 0 |
| 188191 | 1 | 0 | 0 | 0 | 0 |
| 191192 | 1 | 0 | 0 | 0 | 0 |
| 191199 | 2 | 0 | 0 | 0 | 0 |
| 192193 | 1 | 0 | 0 | 0 | 0 |
| 193194 | 1 | 0 | 0 | 0 | 0 |
| 193195 | 1 | 0 | 0 | 0 | 0 |
| 193196 | 1 | 0 | 0 | 0 | 0 |
| 196197 | 1 | 0 | 0 | 0 | 0 |
| 196198 | 1 | 0 | 0 | 0 | 0 |
| 196200 | 1 | 0 | 0 | 0 | 0 |
| 200201 | 1 | 0 | 0 | 0 | 0 |
| 200202 | 1 | 0 | 0 | 0 | 0 |
| 200203 | 1 | 0 | 0 | 0 | 0 |
| 203204 | 1 | 0 | 0 | 0 | 0 |
| 203205 | 1 | 0 | 0 | 0 | 0 |
| 206207 | 1 | 0 | 0 | 0 | 0 |
| 206208 | 1 | 0 | 0 | 0 | 0 |
| 208209 | 1 | 0 | 0 | 0 | 0 |
| 208210 | 1 | 0 | 0 | 0 | 0 |
| 208211 | 1 | 0 | 0 | 0 | 0 |
| 211212 | 1 | 0 | 0 | 0 | 0 |
| 211213 | 1 | 0 | 0 | 0 | 0 |
| 211214 | 1 | 0 | 0 | 0 | 0 |
| 214215 | 1 | 0 | 0 | 0 | 0 |
| 214216 | 1 | 0 | 0 | 0 | 0 |
| 214217 | 1 | 0 | 0 | 0 | 0 |
| 217218 | 1 | 0 | 0 | 0 | 0 |
| 217219 | 1 | 0 | 0 | 0 | 0 |
| 217220 | 1 | 0 | 0 | 0 | 0 |
| 220236 | 1 | 0 | 0 | 0 | 0 |
| 221222 | 1 | 0 | 0 | 0 | 0 |
| 221223 | 1 | 0 | 0 | 0 | 0 |
| 221224 | 1 | 0 | 0 | 0 | 0 |
| 221233 | 1 | 0 | 0 | 0 | 0 |
| 224225 | 1 | 0 | 0 | 0 | 0 |
| 225226 | 1 | 0 | 0 | 0 | 0 |
| 225232 | 2 | 0 | 0 | 0 | 0 |
| 226227 | 1 | 0 | 0 | 0 | 0 |
| 226228 | 1 | 0 | 0 | 0 | 0 |
| 226229 | 1 | 0 | 0 | 0 | 0 |
| 229230 | 1 | 0 | 0 | 0 | 0 |
| 229231 | 1 | 0 | 0 | 0 | 0 |
| 229271 | 1 | 0 | 0 | 0 | 0 |
| 233234 | 1 | 0 | 0 | 0 | 0 |
| 233235 | 1 | 0 | 0 | 0 | 0 |
| 233254 | 1 | 0 | 0 | 0 | 0 |
| 236237 | 1 | 0 | 0 | 0 | 0 |
| 236238 | 1 | 0 | 0 | 0 | 0 |
| 236239 | 1 | 0 | 0 | 0 | 0 |
| 239240 | 1 | 0 | 0 | 0 | 0 |
| 239241 | 1 | 0 | 0 | 0 | 0 |
| 239242 | 1 | 0 | 0 | 0 | 0 |
| 242243 | 1 | 0 | 0 | 0 | 0 |
| 242250 | 2 | 0 | 0 | 0 | 0 |
| 243244 | 1 | 0 | 0 | 0 | 0 |
| 244245 | 1 | 0 | 0 | 0 | 0 |
| 244246 | 1 | 0 | 0 | 0 | 0 |
| 244247 | 1 | 0 | 0 | 0 | 0 |

```

247248 1 0 0 0 0
247249 1 0 0 0 0
247251 1 0 0 0 0
251252 1 0 0 0 0
251253 1 0 0 0 0
251254 1 0 0 0 0
254255 1 0 0 0 0
254256 1 0 0 0 0
257258 1 0 0 0 0
257259 1 0 0 0 0
259260 1 0 0 0 0
259261 1 0 0 0 0
259262 1 0 0 0 0
262263 1 0 0 0 0
262264 1 0 0 0 0
262265 1 0 0 0 0
265266 1 0 0 0 0
265267 1 0 0 0 0
265268 1 0 0 0 0
268269 1 0 0 0 0
268270 1 0 0 0 0
268271 1 0 0 0 0
271272 1 0 0 0 0

```

```

M END
> <NAME>
E28_12

```

```

$$$$
E32_12
MOE2012 3D

```

```

290289 0 0 1 0 0 0 0 0999 V2000
57.8180 25.9490 -27.3180 O 0 0 0 0 0 0 0 0 0 0 0 0 0 0 0
58.7810 26.0450 -27.4140 H 0 0 0 0 0 0 0 0 0 0 0 0 0 0 0
57.5890 25.1710 -26.1520 C 0 0 0 0 0 0 0 0 0 0 0 0 0 0 0
58.0860 24.2040 -26.2750 H 0 0 0 0 0 0 0 0 0 0 0 0 0 0 0
58.0290 25.6910 -25.2940 H 0 0 0 0 0 0 0 0 0 0 0 0 0 0 0
56.0890 24.9930 -25.9690 C 0 0 0 0 0 0 0 0 0 0 0 0 0 0 0
55.6110 25.9790 -25.9020 H 0 0 0 0 0 0 0 0 0 0 0 0 0 0 0
55.6680 24.5170 -26.8640 H 0 0 0 0 0 0 0 0 0 0 0 0 0 0 0
55.7660 24.1640 -24.7280 C 0 0 0 0 0 0 0 0 0 0 0 0 0 0 0
56.2440 23.1810 -24.8080 H 0 0 0 0 0 0 0 0 0 0 0 0 0 0 0
56.1820 24.6550 -23.8400 H 0 0 0 0 0 0 0 0 0 0 0 0 0 0 0
54.2560 23.9870 -24.5550 C 0 0 0 0 0 0 0 0 0 0 0 0 0 0 0
53.7790 24.9720 -24.4780 H 0 0 0 0 0 0 0 0 0 0 0 0 0 0 0
53.8410 23.4960 -25.4450 H 0 0 0 0 0 0 0 0 0 0 0 0 0 0 0
53.9350 23.1570 -23.3100 C 0 0 0 0 0 0 0 0 0 0 0 0 0 0 0
54.4140 22.1740 -23.3960 H 0 0 0 0 0 0 0 0 0 0 0 0 0 0 0
54.3400 23.6570 -22.4220 H 0 0 0 0 0 0 0 0 0 0 0 0 0 0 0
52.4860 22.9960 -23.1850 N 0 0 0 3 0 0 0 0 0 0 0 0 0 0 0
52.0450 23.9140 -23.1340 H 0 0 0 0 0 0 0 0 0 0 0 0 0 0 0
42.6720 18.4330 -17.5120 C 0 0 0 0 0 0 0 0 0 0 0 0 0 0 0
42.3800 17.9170 -18.4350 H 0 0 0 0 0 0 0 0 0 0 0 0 0 0 0
42.2310 19.4370 -17.4970 H 0 0 0 0 0 0 0 0 0 0 0 0 0 0 0
42.1990 17.6870 -16.3800 O 0 0 0 0 0 0 0 0 0 0 0 0 0 0 0
40.8430 17.5430 -16.3200 C 0 0 0 0 0 0 0 0 0 0 0 0 0 0 0
40.4790 16.7510 -15.0840 C 0 0 0 0 0 0 0 0 0 0 0 0 0 0 0
40.9280 15.7570 -15.1790 H 0 0 0 0 0 0 0 0 0 0 0 0 0 0 0
40.9160 17.2610 -14.2200 H 0 0 0 0 0 0 0 0 0 0 0 0 0 0 0
38.9570 16.6370 -14.9290 C 0 0 0 0 0 0 0 0 0 0 0 0 0 0 0
38.5030 17.6350 -15.0010 H 0 0 0 0 0 0 0 0 0 0 0 0 0 0 0
38.5490 16.0880 -15.7880 H 0 0 0 0 0 0 0 0 0 0 0 0 0 0 0
40.0520 17.9880 -17.1390 O 0 0 0 0 0 0 0 0 0 0 0 0 0 0 0
44.1920 18.5260 -17.4210 C 0 0 0 0 0 0 0 0 0 0 0 0 0 0 0
44.4690 18.9950 -16.4680 H 0 0 0 0 0 0 0 0 0 0 0 0 0 0 0
44.6160 17.5150 -17.3920 H 0 0 0 0 0 0 0 0 0 0 0 0 0 0 0
52.1440 22.2140 -21.9940 C 0 0 0 0 0 0 0 0 0 0 0 0 0 0 0
52.6240 21.2290 -22.0430 H 0 0 0 0 0 0 0 0 0 0 0 0 0 0 0
52.5120 22.7190 -21.0920 H 0 0 0 0 0 0 0 0 0 0 0 0 0 0 0
50.6310 22.0370 -21.9070 C 0 0 0 0 0 0 0 0 0 0 0 0 0 0 0
50.1380 23.0130 -21.8330 H 0 0 0 0 0 0 0 0 0 0 0 0 0 0 0
50.2620 21.5150 -22.7980 H 0 0 0 0 0 0 0 0 0 0 0 0 0 0 0
50.2520 21.2260 -20.6940 C 0 0 0 0 0 0 0 0 0 0 0 0 0 0 0
48.8980 21.0550 -20.6670 O 0 0 0 0 0 0 0 0 0 0 0 0 0 0 0
48.4170 20.2970 -19.5470 C 0 0 0 0 0 0 0 0 0 0 0 0 0 0 0
48.8610 19.2950 -19.5690 H 0 0 0 0 0 0 0 0 0 0 0 0 0 0 0
48.6990 20.8040 -18.6170 H 0 0 0 0 0 0 0 0 0 0 0 0 0 0 0
46.8980 20.2000 -19.6500 C 0 0 0 0 0 0 0 0 0 0 0 0 0 0 0
46.4710 21.2100 -19.6790 H 0 0 0 0 0 0 0 0 0 0 0 0 0 0 0
46.6280 19.7330 -20.6060 H 0 0 0 0 0 0 0 0 0 0 0 0 0 0 0
51.0330 20.7930 -19.8580 O 0 0 0 0 0 0 0 0 0 0 0 0 0 0 0

```







|    |    |   |   |   |   |   |
|----|----|---|---|---|---|---|
| 3  | 4  | 1 | 0 | 0 | 0 | 0 |
| 3  | 5  | 1 | 0 | 0 | 0 | 0 |
| 3  | 6  | 1 | 0 | 0 | 0 | 0 |
| 6  | 7  | 1 | 0 | 0 | 0 | 0 |
| 6  | 8  | 1 | 0 | 0 | 0 | 0 |
| 6  | 9  | 1 | 0 | 0 | 0 | 0 |
| 9  | 10 | 1 | 0 | 0 | 0 | 0 |
| 9  | 11 | 1 | 0 | 0 | 0 | 0 |
| 9  | 12 | 1 | 0 | 0 | 0 | 0 |
| 12 | 13 | 1 | 0 | 0 | 0 | 0 |
| 12 | 14 | 1 | 0 | 0 | 0 | 0 |
| 12 | 15 | 1 | 0 | 0 | 0 | 0 |
| 15 | 16 | 1 | 0 | 0 | 0 | 0 |
| 15 | 17 | 1 | 0 | 0 | 0 | 0 |
| 15 | 18 | 1 | 0 | 0 | 0 | 0 |
| 18 | 19 | 1 | 0 | 0 | 0 | 0 |
| 18 | 35 | 1 | 0 | 0 | 0 | 0 |
| 20 | 21 | 1 | 0 | 0 | 0 | 0 |
| 20 | 22 | 1 | 0 | 0 | 0 | 0 |
| 20 | 23 | 1 | 0 | 0 | 0 | 0 |
| 20 | 32 | 1 | 0 | 0 | 0 | 0 |
| 23 | 24 | 1 | 0 | 0 | 0 | 0 |
| 24 | 25 | 1 | 0 | 0 | 0 | 0 |
| 24 | 31 | 2 | 0 | 0 | 0 | 0 |
| 25 | 26 | 1 | 0 | 0 | 0 | 0 |
| 25 | 27 | 1 | 0 | 0 | 0 | 0 |
| 25 | 28 | 1 | 0 | 0 | 0 | 0 |
| 28 | 29 | 1 | 0 | 0 | 0 | 0 |
| 28 | 30 | 1 | 0 | 0 | 0 | 0 |
| 28 | 73 | 1 | 0 | 0 | 0 | 0 |
| 32 | 33 | 1 | 0 | 0 | 0 | 0 |
| 32 | 34 | 1 | 0 | 0 | 0 | 0 |
| 32 | 53 | 1 | 0 | 0 | 0 | 0 |
| 35 | 36 | 1 | 0 | 0 | 0 | 0 |
| 35 | 37 | 1 | 0 | 0 | 0 | 0 |
| 35 | 38 | 1 | 0 | 0 | 0 | 0 |
| 38 | 39 | 1 | 0 | 0 | 0 | 0 |
| 38 | 40 | 1 | 0 | 0 | 0 | 0 |
| 38 | 41 | 1 | 0 | 0 | 0 | 0 |
| 41 | 42 | 1 | 0 | 0 | 0 | 0 |
| 41 | 49 | 2 | 0 | 0 | 0 | 0 |
| 42 | 43 | 1 | 0 | 0 | 0 | 0 |
| 43 | 44 | 1 | 0 | 0 | 0 | 0 |
| 43 | 45 | 1 | 0 | 0 | 0 | 0 |
| 43 | 46 | 1 | 0 | 0 | 0 | 0 |
| 46 | 47 | 1 | 0 | 0 | 0 | 0 |
| 46 | 48 | 1 | 0 | 0 | 0 | 0 |
| 46 | 50 | 1 | 0 | 0 | 0 | 0 |
| 50 | 51 | 1 | 0 | 0 | 0 | 0 |
| 50 | 52 | 1 | 0 | 0 | 0 | 0 |
| 50 | 53 | 1 | 0 | 0 | 0 | 0 |
| 53 | 54 | 1 | 0 | 0 | 0 | 0 |
| 53 | 55 | 1 | 0 | 0 | 0 | 0 |
| 56 | 57 | 1 | 0 | 0 | 0 | 0 |
| 56 | 58 | 1 | 0 | 0 | 0 | 0 |
| 58 | 59 | 1 | 0 | 0 | 0 | 0 |
| 58 | 60 | 1 | 0 | 0 | 0 | 0 |
| 58 | 61 | 1 | 0 | 0 | 0 | 0 |
| 61 | 62 | 1 | 0 | 0 | 0 | 0 |
| 61 | 63 | 1 | 0 | 0 | 0 | 0 |
| 61 | 64 | 1 | 0 | 0 | 0 | 0 |
| 64 | 65 | 1 | 0 | 0 | 0 | 0 |
| 64 | 66 | 1 | 0 | 0 | 0 | 0 |
| 64 | 67 | 1 | 0 | 0 | 0 | 0 |
| 67 | 68 | 1 | 0 | 0 | 0 | 0 |
| 67 | 69 | 1 | 0 | 0 | 0 | 0 |
| 67 | 70 | 1 | 0 | 0 | 0 | 0 |
| 70 | 71 | 1 | 0 | 0 | 0 | 0 |
| 70 | 72 | 1 | 0 | 0 | 0 | 0 |
| 70 | 73 | 1 | 0 | 0 | 0 | 0 |
| 73 | 89 | 1 | 0 | 0 | 0 | 0 |
| 74 | 75 | 1 | 0 | 0 | 0 | 0 |
| 74 | 76 | 1 | 0 | 0 | 0 | 0 |
| 74 | 77 | 1 | 0 | 0 | 0 | 0 |
| 74 | 86 | 1 | 0 | 0 | 0 | 0 |
| 77 | 78 | 1 | 0 | 0 | 0 | 0 |
| 78 | 79 | 1 | 0 | 0 | 0 | 0 |
| 78 | 85 | 2 | 0 | 0 | 0 | 0 |
| 79 | 80 | 1 | 0 | 0 | 0 | 0 |
| 79 | 81 | 1 | 0 | 0 | 0 | 0 |
| 79 | 82 | 1 | 0 | 0 | 0 | 0 |



|     |     |   |   |   |   |   |
|-----|-----|---|---|---|---|---|
| 82  | 83  | 1 | 0 | 0 | 0 | 0 |
| 82  | 84  | 1 | 0 | 0 | 0 | 0 |
| 82  | 127 | 1 | 0 | 0 | 0 | 0 |
| 86  | 87  | 1 | 0 | 0 | 0 | 0 |
| 86  | 88  | 1 | 0 | 0 | 0 | 0 |
| 86  | 107 | 1 | 0 | 0 | 0 | 0 |
| 89  | 90  | 1 | 0 | 0 | 0 | 0 |
| 89  | 91  | 1 | 0 | 0 | 0 | 0 |
| 89  | 92  | 1 | 0 | 0 | 0 | 0 |
| 92  | 93  | 1 | 0 | 0 | 0 | 0 |
| 92  | 94  | 1 | 0 | 0 | 0 | 0 |
| 92  | 95  | 1 | 0 | 0 | 0 | 0 |
| 95  | 96  | 1 | 0 | 0 | 0 | 0 |
| 95  | 103 | 2 | 0 | 0 | 0 | 0 |
| 96  | 97  | 1 | 0 | 0 | 0 | 0 |
| 97  | 98  | 1 | 0 | 0 | 0 | 0 |
| 97  | 99  | 1 | 0 | 0 | 0 | 0 |
| 97  | 100 | 1 | 0 | 0 | 0 | 0 |
| 100 | 101 | 1 | 0 | 0 | 0 | 0 |
| 100 | 102 | 1 | 0 | 0 | 0 | 0 |
| 100 | 104 | 1 | 0 | 0 | 0 | 0 |
| 104 | 105 | 1 | 0 | 0 | 0 | 0 |
| 104 | 106 | 1 | 0 | 0 | 0 | 0 |
| 104 | 107 | 1 | 0 | 0 | 0 | 0 |
| 107 | 108 | 1 | 0 | 0 | 0 | 0 |
| 107 | 109 | 1 | 0 | 0 | 0 | 0 |
| 110 | 111 | 1 | 0 | 0 | 0 | 0 |
| 110 | 112 | 1 | 0 | 0 | 0 | 0 |
| 112 | 113 | 1 | 0 | 0 | 0 | 0 |
| 112 | 114 | 1 | 0 | 0 | 0 | 0 |
| 112 | 115 | 1 | 0 | 0 | 0 | 0 |
| 115 | 116 | 1 | 0 | 0 | 0 | 0 |
| 115 | 117 | 1 | 0 | 0 | 0 | 0 |
| 115 | 118 | 1 | 0 | 0 | 0 | 0 |
| 118 | 119 | 1 | 0 | 0 | 0 | 0 |
| 118 | 120 | 1 | 0 | 0 | 0 | 0 |
| 118 | 121 | 1 | 0 | 0 | 0 | 0 |
| 121 | 122 | 1 | 0 | 0 | 0 | 0 |
| 121 | 123 | 1 | 0 | 0 | 0 | 0 |
| 121 | 124 | 1 | 0 | 0 | 0 | 0 |
| 124 | 125 | 1 | 0 | 0 | 0 | 0 |
| 124 | 126 | 1 | 0 | 0 | 0 | 0 |
| 124 | 127 | 1 | 0 | 0 | 0 | 0 |
| 127 | 143 | 1 | 0 | 0 | 0 | 0 |
| 128 | 129 | 1 | 0 | 0 | 0 | 0 |
| 128 | 130 | 1 | 0 | 0 | 0 | 0 |
| 128 | 131 | 1 | 0 | 0 | 0 | 0 |
| 128 | 140 | 1 | 0 | 0 | 0 | 0 |
| 131 | 132 | 1 | 0 | 0 | 0 | 0 |
| 132 | 133 | 1 | 0 | 0 | 0 | 0 |
| 132 | 139 | 2 | 0 | 0 | 0 | 0 |
| 133 | 134 | 1 | 0 | 0 | 0 | 0 |
| 133 | 135 | 1 | 0 | 0 | 0 | 0 |
| 133 | 136 | 1 | 0 | 0 | 0 | 0 |
| 136 | 137 | 1 | 0 | 0 | 0 | 0 |
| 136 | 138 | 1 | 0 | 0 | 0 | 0 |
| 136 | 181 | 1 | 0 | 0 | 0 | 0 |
| 140 | 141 | 1 | 0 | 0 | 0 | 0 |
| 140 | 142 | 1 | 0 | 0 | 0 | 0 |
| 140 | 161 | 1 | 0 | 0 | 0 | 0 |
| 143 | 144 | 1 | 0 | 0 | 0 | 0 |
| 143 | 145 | 1 | 0 | 0 | 0 | 0 |
| 143 | 146 | 1 | 0 | 0 | 0 | 0 |
| 146 | 147 | 1 | 0 | 0 | 0 | 0 |
| 146 | 148 | 1 | 0 | 0 | 0 | 0 |
| 146 | 149 | 1 | 0 | 0 | 0 | 0 |
| 149 | 150 | 1 | 0 | 0 | 0 | 0 |
| 149 | 157 | 2 | 0 | 0 | 0 | 0 |
| 150 | 151 | 1 | 0 | 0 | 0 | 0 |
| 151 | 152 | 1 | 0 | 0 | 0 | 0 |
| 151 | 153 | 1 | 0 | 0 | 0 | 0 |
| 151 | 154 | 1 | 0 | 0 | 0 | 0 |
| 154 | 155 | 1 | 0 | 0 | 0 | 0 |
| 154 | 156 | 1 | 0 | 0 | 0 | 0 |
| 154 | 158 | 1 | 0 | 0 | 0 | 0 |
| 158 | 159 | 1 | 0 | 0 | 0 | 0 |
| 158 | 160 | 1 | 0 | 0 | 0 | 0 |
| 158 | 161 | 1 | 0 | 0 | 0 | 0 |
| 161 | 162 | 1 | 0 | 0 | 0 | 0 |
| 161 | 163 | 1 | 0 | 0 | 0 | 0 |
| 164 | 165 | 1 | 0 | 0 | 0 | 0 |

|        |   |   |   |   |   |
|--------|---|---|---|---|---|
| 164166 | 1 | 0 | 0 | 0 | 0 |
| 166167 | 1 | 0 | 0 | 0 | 0 |
| 166168 | 1 | 0 | 0 | 0 | 0 |
| 166169 | 1 | 0 | 0 | 0 | 0 |
| 169170 | 1 | 0 | 0 | 0 | 0 |
| 169171 | 1 | 0 | 0 | 0 | 0 |
| 169172 | 1 | 0 | 0 | 0 | 0 |
| 172173 | 1 | 0 | 0 | 0 | 0 |
| 172174 | 1 | 0 | 0 | 0 | 0 |
| 172175 | 1 | 0 | 0 | 0 | 0 |
| 175176 | 1 | 0 | 0 | 0 | 0 |
| 175177 | 1 | 0 | 0 | 0 | 0 |
| 175178 | 1 | 0 | 0 | 0 | 0 |
| 178179 | 1 | 0 | 0 | 0 | 0 |
| 178180 | 1 | 0 | 0 | 0 | 0 |
| 178181 | 1 | 0 | 0 | 0 | 0 |
| 181197 | 1 | 0 | 0 | 0 | 0 |
| 182183 | 1 | 0 | 0 | 0 | 0 |
| 182184 | 1 | 0 | 0 | 0 | 0 |
| 182185 | 1 | 0 | 0 | 0 | 0 |
| 182194 | 1 | 0 | 0 | 0 | 0 |
| 185186 | 1 | 0 | 0 | 0 | 0 |
| 186187 | 1 | 0 | 0 | 0 | 0 |
| 186193 | 2 | 0 | 0 | 0 | 0 |
| 187188 | 1 | 0 | 0 | 0 | 0 |
| 187189 | 1 | 0 | 0 | 0 | 0 |
| 187190 | 1 | 0 | 0 | 0 | 0 |
| 190191 | 1 | 0 | 0 | 0 | 0 |
| 190192 | 1 | 0 | 0 | 0 | 0 |
| 190235 | 1 | 0 | 0 | 0 | 0 |
| 194195 | 1 | 0 | 0 | 0 | 0 |
| 194196 | 1 | 0 | 0 | 0 | 0 |
| 194215 | 1 | 0 | 0 | 0 | 0 |
| 197198 | 1 | 0 | 0 | 0 | 0 |
| 197199 | 1 | 0 | 0 | 0 | 0 |
| 197200 | 1 | 0 | 0 | 0 | 0 |
| 200201 | 1 | 0 | 0 | 0 | 0 |
| 200202 | 1 | 0 | 0 | 0 | 0 |
| 200203 | 1 | 0 | 0 | 0 | 0 |
| 203204 | 1 | 0 | 0 | 0 | 0 |
| 203211 | 2 | 0 | 0 | 0 | 0 |
| 204205 | 1 | 0 | 0 | 0 | 0 |
| 205206 | 1 | 0 | 0 | 0 | 0 |
| 205207 | 1 | 0 | 0 | 0 | 0 |
| 205208 | 1 | 0 | 0 | 0 | 0 |
| 208209 | 1 | 0 | 0 | 0 | 0 |
| 208210 | 1 | 0 | 0 | 0 | 0 |
| 208212 | 1 | 0 | 0 | 0 | 0 |
| 212213 | 1 | 0 | 0 | 0 | 0 |
| 212214 | 1 | 0 | 0 | 0 | 0 |
| 212215 | 1 | 0 | 0 | 0 | 0 |
| 215216 | 1 | 0 | 0 | 0 | 0 |
| 215217 | 1 | 0 | 0 | 0 | 0 |
| 218219 | 1 | 0 | 0 | 0 | 0 |
| 218220 | 1 | 0 | 0 | 0 | 0 |
| 220221 | 1 | 0 | 0 | 0 | 0 |
| 220222 | 1 | 0 | 0 | 0 | 0 |
| 220223 | 1 | 0 | 0 | 0 | 0 |
| 223224 | 1 | 0 | 0 | 0 | 0 |
| 223225 | 1 | 0 | 0 | 0 | 0 |
| 223226 | 1 | 0 | 0 | 0 | 0 |
| 226227 | 1 | 0 | 0 | 0 | 0 |
| 226228 | 1 | 0 | 0 | 0 | 0 |
| 226229 | 1 | 0 | 0 | 0 | 0 |
| 229230 | 1 | 0 | 0 | 0 | 0 |
| 229231 | 1 | 0 | 0 | 0 | 0 |
| 229232 | 1 | 0 | 0 | 0 | 0 |
| 232233 | 1 | 0 | 0 | 0 | 0 |
| 232234 | 1 | 0 | 0 | 0 | 0 |
| 232235 | 1 | 0 | 0 | 0 | 0 |
| 235251 | 1 | 0 | 0 | 0 | 0 |
| 236237 | 1 | 0 | 0 | 0 | 0 |
| 236238 | 1 | 0 | 0 | 0 | 0 |
| 236239 | 1 | 0 | 0 | 0 | 0 |
| 236248 | 1 | 0 | 0 | 0 | 0 |
| 239240 | 1 | 0 | 0 | 0 | 0 |
| 240241 | 1 | 0 | 0 | 0 | 0 |
| 240247 | 2 | 0 | 0 | 0 | 0 |
| 241242 | 1 | 0 | 0 | 0 | 0 |
| 241243 | 1 | 0 | 0 | 0 | 0 |
| 241244 | 1 | 0 | 0 | 0 | 0 |

```

244245 1 0 0 0 0
244246 1 0 0 0 0
244289 1 0 0 0 0
248249 1 0 0 0 0
248250 1 0 0 0 0
248269 1 0 0 0 0
251252 1 0 0 0 0
251253 1 0 0 0 0
251254 1 0 0 0 0
254255 1 0 0 0 0
254256 1 0 0 0 0
254257 1 0 0 0 0
257258 1 0 0 0 0
257265 2 0 0 0 0
258259 1 0 0 0 0
259260 1 0 0 0 0
259261 1 0 0 0 0
259262 1 0 0 0 0
262263 1 0 0 0 0
262264 1 0 0 0 0
262266 1 0 0 0 0
266267 1 0 0 0 0
266268 1 0 0 0 0
266269 1 0 0 0 0
269270 1 0 0 0 0
269271 1 0 0 0 0
272273 1 0 0 0 0
272274 1 0 0 0 0
274275 1 0 0 0 0
274276 1 0 0 0 0
274277 1 0 0 0 0
277278 1 0 0 0 0
277279 1 0 0 0 0
277280 1 0 0 0 0
280281 1 0 0 0 0
280282 1 0 0 0 0
280283 1 0 0 0 0
283284 1 0 0 0 0
283285 1 0 0 0 0
283286 1 0 0 0 0
286287 1 0 0 0 0
286288 1 0 0 0 0
286289 1 0 0 0 0
289290 1 0 0 0 0

```

```

M END
> <NAME>
E32_12

```

```

$$$$
E36_12
MOE2012 3D

```

```

308307 0 0 1 0 0 0 0 0999 V2000
20.2470 -5.2220 -19.8040 O 0 0 0 0 0 0 0 0 0 0 0 0 0 0 0 0
19.8640 -5.6010 -20.6130 H 0 0 0 0 0 0 0 0 0 0 0 0 0 0 0 0
21.5730 -4.8220 -20.1200 C 0 0 0 0 0 0 0 0 0 0 0 0 0 0 0 0
22.1290 -5.7010 -20.4620 H 0 0 0 0 0 0 0 0 0 0 0 0 0 0 0 0
21.5310 -4.0890 -20.9330 H 0 0 0 0 0 0 0 0 0 0 0 0 0 0 0 0
22.2210 -4.2180 -18.8810 C 0 0 0 0 0 0 0 0 0 0 0 0 0 0 0 0
21.6200 -3.3680 -18.5340 H 0 0 0 0 0 0 0 0 0 0 0 0 0 0 0 0
22.2000 -4.9530 -18.0660 H 0 0 0 0 0 0 0 0 0 0 0 0 0 0 0 0
23.6580 -3.7730 -19.1530 C 0 0 0 0 0 0 0 0 0 0 0 0 0 0 0 0
24.2490 -4.6320 -19.4920 H 0 0 0 0 0 0 0 0 0 0 0 0 0 0 0 0
23.6660 -3.0350 -19.9650 H 0 0 0 0 0 0 0 0 0 0 0 0 0 0 0 0
24.3050 -3.1670 -17.9050 C 0 0 0 0 0 0 0 0 0 0 0 0 0 0 0 0
23.7200 -2.3020 -17.5710 H 0 0 0 0 0 0 0 0 0 0 0 0 0 0 0 0
24.2900 -3.9020 -17.0910 H 0 0 0 0 0 0 0 0 0 0 0 0 0 0 0 0
25.7500 -2.7350 -18.1770 C 0 0 0 0 0 0 0 0 0 0 0 0 0 0 0 0
26.3310 -3.6020 -18.5150 H 0 0 0 0 0 0 0 0 0 0 0 0 0 0 0 0
25.7640 -1.9990 -18.9910 H 0 0 0 0 0 0 0 0 0 0 0 0 0 0 0 0
26.3970 -2.1330 -16.9260 C 0 0 0 0 0 0 0 0 0 0 0 0 0 0 0 0
25.8190 -1.2590 -16.6030 H 0 0 0 0 0 0 0 0 0 0 0 0 0 0 0 0
26.3810 -2.8720 -16.1160 H 0 0 0 0 0 0 0 0 0 0 0 0 0 0 0 0
27.7770 -1.7370 -17.2220 N 0 0 0 3 0 0 0 0 0 0 0 0 0 0 0 0
28.2940 -2.5500 -17.5570 H 0 0 0 0 0 0 0 0 0 0 0 0 0 0 0 0
38.3570 3.4180 -13.9370 C 0 0 0 0 0 0 0 0 0 0 0 0 0 0 0 0
38.2300 4.1440 -14.7480 H 0 0 0 0 0 0 0 0 0 0 0 0 0 0 0 0
38.9080 2.5450 -14.3070 H 0 0 0 0 0 0 0 0 0 0 0 0 0 0 0 0
39.0930 4.0260 -12.8650 O 0 0 0 0 0 0 0 0 0 0 0 0 0 0 0 0
40.3340 4.4720 -13.2090 C 0 0 0 0 0 0 0 0 0 0 0 0 0 0 0 0
40.9990 5.0820 -12.0010 C 0 0 0 0 0 0 0 0 0 0 0 0 0 0 0 0

```









|     |     |   |   |   |   |   |
|-----|-----|---|---|---|---|---|
| 44  | 45  | 1 | 0 | 0 | 0 | 0 |
| 44  | 52  | 2 | 0 | 0 | 0 | 0 |
| 45  | 46  | 1 | 0 | 0 | 0 | 0 |
| 46  | 47  | 1 | 0 | 0 | 0 | 0 |
| 46  | 48  | 1 | 0 | 0 | 0 | 0 |
| 46  | 49  | 1 | 0 | 0 | 0 | 0 |
| 49  | 50  | 1 | 0 | 0 | 0 | 0 |
| 49  | 51  | 1 | 0 | 0 | 0 | 0 |
| 49  | 53  | 1 | 0 | 0 | 0 | 0 |
| 53  | 54  | 1 | 0 | 0 | 0 | 0 |
| 53  | 55  | 1 | 0 | 0 | 0 | 0 |
| 53  | 56  | 1 | 0 | 0 | 0 | 0 |
| 56  | 57  | 1 | 0 | 0 | 0 | 0 |
| 56  | 58  | 1 | 0 | 0 | 0 | 0 |
| 59  | 60  | 1 | 0 | 0 | 0 | 0 |
| 59  | 61  | 1 | 0 | 0 | 0 | 0 |
| 61  | 62  | 1 | 0 | 0 | 0 | 0 |
| 61  | 63  | 1 | 0 | 0 | 0 | 0 |
| 61  | 64  | 1 | 0 | 0 | 0 | 0 |
| 64  | 65  | 1 | 0 | 0 | 0 | 0 |
| 64  | 66  | 1 | 0 | 0 | 0 | 0 |
| 64  | 67  | 1 | 0 | 0 | 0 | 0 |
| 67  | 68  | 1 | 0 | 0 | 0 | 0 |
| 67  | 69  | 1 | 0 | 0 | 0 | 0 |
| 67  | 70  | 1 | 0 | 0 | 0 | 0 |
| 70  | 71  | 1 | 0 | 0 | 0 | 0 |
| 70  | 72  | 1 | 0 | 0 | 0 | 0 |
| 70  | 73  | 1 | 0 | 0 | 0 | 0 |
| 73  | 74  | 1 | 0 | 0 | 0 | 0 |
| 73  | 75  | 1 | 0 | 0 | 0 | 0 |
| 73  | 76  | 1 | 0 | 0 | 0 | 0 |
| 76  | 77  | 1 | 0 | 0 | 0 | 0 |
| 76  | 78  | 1 | 0 | 0 | 0 | 0 |
| 76  | 79  | 1 | 0 | 0 | 0 | 0 |
| 79  | 95  | 1 | 0 | 0 | 0 | 0 |
| 80  | 81  | 1 | 0 | 0 | 0 | 0 |
| 80  | 82  | 1 | 0 | 0 | 0 | 0 |
| 80  | 83  | 1 | 0 | 0 | 0 | 0 |
| 80  | 92  | 1 | 0 | 0 | 0 | 0 |
| 83  | 84  | 1 | 0 | 0 | 0 | 0 |
| 84  | 85  | 1 | 0 | 0 | 0 | 0 |
| 84  | 91  | 2 | 0 | 0 | 0 | 0 |
| 85  | 86  | 1 | 0 | 0 | 0 | 0 |
| 85  | 87  | 1 | 0 | 0 | 0 | 0 |
| 85  | 88  | 1 | 0 | 0 | 0 | 0 |
| 88  | 89  | 1 | 0 | 0 | 0 | 0 |
| 88  | 90  | 1 | 0 | 0 | 0 | 0 |
| 88  | 136 | 1 | 0 | 0 | 0 | 0 |
| 92  | 93  | 1 | 0 | 0 | 0 | 0 |
| 92  | 94  | 1 | 0 | 0 | 0 | 0 |
| 92  | 113 | 1 | 0 | 0 | 0 | 0 |
| 95  | 96  | 1 | 0 | 0 | 0 | 0 |
| 95  | 97  | 1 | 0 | 0 | 0 | 0 |
| 95  | 98  | 1 | 0 | 0 | 0 | 0 |
| 98  | 99  | 1 | 0 | 0 | 0 | 0 |
| 98  | 100 | 1 | 0 | 0 | 0 | 0 |
| 98  | 101 | 1 | 0 | 0 | 0 | 0 |
| 101 | 102 | 1 | 0 | 0 | 0 | 0 |
| 101 | 109 | 2 | 0 | 0 | 0 | 0 |
| 102 | 103 | 1 | 0 | 0 | 0 | 0 |
| 103 | 104 | 1 | 0 | 0 | 0 | 0 |
| 103 | 105 | 1 | 0 | 0 | 0 | 0 |
| 103 | 106 | 1 | 0 | 0 | 0 | 0 |
| 106 | 107 | 1 | 0 | 0 | 0 | 0 |
| 106 | 108 | 1 | 0 | 0 | 0 | 0 |
| 106 | 110 | 1 | 0 | 0 | 0 | 0 |
| 110 | 111 | 1 | 0 | 0 | 0 | 0 |
| 110 | 112 | 1 | 0 | 0 | 0 | 0 |
| 110 | 113 | 1 | 0 | 0 | 0 | 0 |
| 113 | 114 | 1 | 0 | 0 | 0 | 0 |
| 113 | 115 | 1 | 0 | 0 | 0 | 0 |
| 116 | 117 | 1 | 0 | 0 | 0 | 0 |
| 116 | 118 | 1 | 0 | 0 | 0 | 0 |
| 118 | 119 | 1 | 0 | 0 | 0 | 0 |
| 118 | 120 | 1 | 0 | 0 | 0 | 0 |
| 118 | 121 | 1 | 0 | 0 | 0 | 0 |
| 121 | 122 | 1 | 0 | 0 | 0 | 0 |
| 121 | 123 | 1 | 0 | 0 | 0 | 0 |
| 121 | 124 | 1 | 0 | 0 | 0 | 0 |
| 124 | 125 | 1 | 0 | 0 | 0 | 0 |
| 124 | 126 | 1 | 0 | 0 | 0 | 0 |



|        |   |   |   |   |   |
|--------|---|---|---|---|---|
| 124127 | 1 | 0 | 0 | 0 | 0 |
| 127128 | 1 | 0 | 0 | 0 | 0 |
| 127129 | 1 | 0 | 0 | 0 | 0 |
| 127130 | 1 | 0 | 0 | 0 | 0 |
| 130131 | 1 | 0 | 0 | 0 | 0 |
| 130132 | 1 | 0 | 0 | 0 | 0 |
| 130133 | 1 | 0 | 0 | 0 | 0 |
| 133134 | 1 | 0 | 0 | 0 | 0 |
| 133135 | 1 | 0 | 0 | 0 | 0 |
| 133136 | 1 | 0 | 0 | 0 | 0 |
| 136152 | 1 | 0 | 0 | 0 | 0 |
| 137138 | 1 | 0 | 0 | 0 | 0 |
| 137139 | 1 | 0 | 0 | 0 | 0 |
| 137140 | 1 | 0 | 0 | 0 | 0 |
| 137149 | 1 | 0 | 0 | 0 | 0 |
| 140141 | 1 | 0 | 0 | 0 | 0 |
| 141142 | 1 | 0 | 0 | 0 | 0 |
| 141148 | 2 | 0 | 0 | 0 | 0 |
| 142143 | 1 | 0 | 0 | 0 | 0 |
| 142144 | 1 | 0 | 0 | 0 | 0 |
| 142145 | 1 | 0 | 0 | 0 | 0 |
| 145146 | 1 | 0 | 0 | 0 | 0 |
| 145147 | 1 | 0 | 0 | 0 | 0 |
| 145193 | 1 | 0 | 0 | 0 | 0 |
| 149150 | 1 | 0 | 0 | 0 | 0 |
| 149151 | 1 | 0 | 0 | 0 | 0 |
| 149170 | 1 | 0 | 0 | 0 | 0 |
| 152153 | 1 | 0 | 0 | 0 | 0 |
| 152154 | 1 | 0 | 0 | 0 | 0 |
| 152155 | 1 | 0 | 0 | 0 | 0 |
| 155156 | 1 | 0 | 0 | 0 | 0 |
| 155157 | 1 | 0 | 0 | 0 | 0 |
| 155158 | 1 | 0 | 0 | 0 | 0 |
| 158159 | 1 | 0 | 0 | 0 | 0 |
| 158166 | 2 | 0 | 0 | 0 | 0 |
| 159160 | 1 | 0 | 0 | 0 | 0 |
| 160161 | 1 | 0 | 0 | 0 | 0 |
| 160162 | 1 | 0 | 0 | 0 | 0 |
| 160163 | 1 | 0 | 0 | 0 | 0 |
| 163164 | 1 | 0 | 0 | 0 | 0 |
| 163165 | 1 | 0 | 0 | 0 | 0 |
| 163167 | 1 | 0 | 0 | 0 | 0 |
| 167168 | 1 | 0 | 0 | 0 | 0 |
| 167169 | 1 | 0 | 0 | 0 | 0 |
| 167170 | 1 | 0 | 0 | 0 | 0 |
| 170171 | 1 | 0 | 0 | 0 | 0 |
| 170172 | 1 | 0 | 0 | 0 | 0 |
| 173174 | 1 | 0 | 0 | 0 | 0 |
| 173175 | 1 | 0 | 0 | 0 | 0 |
| 175176 | 1 | 0 | 0 | 0 | 0 |
| 175177 | 1 | 0 | 0 | 0 | 0 |
| 175178 | 1 | 0 | 0 | 0 | 0 |
| 178179 | 1 | 0 | 0 | 0 | 0 |
| 178180 | 1 | 0 | 0 | 0 | 0 |
| 178181 | 1 | 0 | 0 | 0 | 0 |
| 181182 | 1 | 0 | 0 | 0 | 0 |
| 181183 | 1 | 0 | 0 | 0 | 0 |
| 181184 | 1 | 0 | 0 | 0 | 0 |
| 184185 | 1 | 0 | 0 | 0 | 0 |
| 184186 | 1 | 0 | 0 | 0 | 0 |
| 184187 | 1 | 0 | 0 | 0 | 0 |
| 187188 | 1 | 0 | 0 | 0 | 0 |
| 187189 | 1 | 0 | 0 | 0 | 0 |
| 187190 | 1 | 0 | 0 | 0 | 0 |
| 190191 | 1 | 0 | 0 | 0 | 0 |
| 190192 | 1 | 0 | 0 | 0 | 0 |
| 190193 | 1 | 0 | 0 | 0 | 0 |
| 193209 | 1 | 0 | 0 | 0 | 0 |
| 194195 | 1 | 0 | 0 | 0 | 0 |
| 194196 | 1 | 0 | 0 | 0 | 0 |
| 194197 | 1 | 0 | 0 | 0 | 0 |
| 194206 | 1 | 0 | 0 | 0 | 0 |
| 197198 | 1 | 0 | 0 | 0 | 0 |
| 198199 | 1 | 0 | 0 | 0 | 0 |
| 198205 | 2 | 0 | 0 | 0 | 0 |
| 199200 | 1 | 0 | 0 | 0 | 0 |
| 199201 | 1 | 0 | 0 | 0 | 0 |
| 199202 | 1 | 0 | 0 | 0 | 0 |
| 202203 | 1 | 0 | 0 | 0 | 0 |
| 202204 | 1 | 0 | 0 | 0 | 0 |
| 202250 | 1 | 0 | 0 | 0 | 0 |

|        |   |   |   |   |   |
|--------|---|---|---|---|---|
| 206207 | 1 | 0 | 0 | 0 | 0 |
| 206208 | 1 | 0 | 0 | 0 | 0 |
| 206227 | 1 | 0 | 0 | 0 | 0 |
| 209210 | 1 | 0 | 0 | 0 | 0 |
| 209211 | 1 | 0 | 0 | 0 | 0 |
| 209212 | 1 | 0 | 0 | 0 | 0 |
| 212213 | 1 | 0 | 0 | 0 | 0 |
| 212214 | 1 | 0 | 0 | 0 | 0 |
| 212215 | 1 | 0 | 0 | 0 | 0 |
| 215216 | 1 | 0 | 0 | 0 | 0 |
| 215223 | 2 | 0 | 0 | 0 | 0 |
| 216217 | 1 | 0 | 0 | 0 | 0 |
| 217218 | 1 | 0 | 0 | 0 | 0 |
| 217219 | 1 | 0 | 0 | 0 | 0 |
| 217220 | 1 | 0 | 0 | 0 | 0 |
| 220221 | 1 | 0 | 0 | 0 | 0 |
| 220222 | 1 | 0 | 0 | 0 | 0 |
| 220224 | 1 | 0 | 0 | 0 | 0 |
| 224225 | 1 | 0 | 0 | 0 | 0 |
| 224226 | 1 | 0 | 0 | 0 | 0 |
| 224227 | 1 | 0 | 0 | 0 | 0 |
| 227228 | 1 | 0 | 0 | 0 | 0 |
| 227229 | 1 | 0 | 0 | 0 | 0 |
| 230231 | 1 | 0 | 0 | 0 | 0 |
| 230232 | 1 | 0 | 0 | 0 | 0 |
| 232233 | 1 | 0 | 0 | 0 | 0 |
| 232234 | 1 | 0 | 0 | 0 | 0 |
| 232235 | 1 | 0 | 0 | 0 | 0 |
| 235236 | 1 | 0 | 0 | 0 | 0 |
| 235237 | 1 | 0 | 0 | 0 | 0 |
| 235238 | 1 | 0 | 0 | 0 | 0 |
| 238239 | 1 | 0 | 0 | 0 | 0 |
| 238240 | 1 | 0 | 0 | 0 | 0 |
| 238241 | 1 | 0 | 0 | 0 | 0 |
| 241242 | 1 | 0 | 0 | 0 | 0 |
| 241243 | 1 | 0 | 0 | 0 | 0 |
| 241244 | 1 | 0 | 0 | 0 | 0 |
| 244245 | 1 | 0 | 0 | 0 | 0 |
| 244246 | 1 | 0 | 0 | 0 | 0 |
| 244247 | 1 | 0 | 0 | 0 | 0 |
| 247248 | 1 | 0 | 0 | 0 | 0 |
| 247249 | 1 | 0 | 0 | 0 | 0 |
| 247250 | 1 | 0 | 0 | 0 | 0 |
| 250266 | 1 | 0 | 0 | 0 | 0 |
| 251252 | 1 | 0 | 0 | 0 | 0 |
| 251253 | 1 | 0 | 0 | 0 | 0 |
| 251254 | 1 | 0 | 0 | 0 | 0 |
| 251263 | 1 | 0 | 0 | 0 | 0 |
| 254255 | 1 | 0 | 0 | 0 | 0 |
| 255256 | 1 | 0 | 0 | 0 | 0 |
| 255262 | 2 | 0 | 0 | 0 | 0 |
| 256257 | 1 | 0 | 0 | 0 | 0 |
| 256258 | 1 | 0 | 0 | 0 | 0 |
| 256259 | 1 | 0 | 0 | 0 | 0 |
| 259260 | 1 | 0 | 0 | 0 | 0 |
| 259261 | 1 | 0 | 0 | 0 | 0 |
| 259307 | 1 | 0 | 0 | 0 | 0 |
| 263264 | 1 | 0 | 0 | 0 | 0 |
| 263265 | 1 | 0 | 0 | 0 | 0 |
| 263284 | 1 | 0 | 0 | 0 | 0 |
| 266267 | 1 | 0 | 0 | 0 | 0 |
| 266268 | 1 | 0 | 0 | 0 | 0 |
| 266269 | 1 | 0 | 0 | 0 | 0 |
| 269270 | 1 | 0 | 0 | 0 | 0 |
| 269271 | 1 | 0 | 0 | 0 | 0 |
| 269272 | 1 | 0 | 0 | 0 | 0 |
| 272273 | 1 | 0 | 0 | 0 | 0 |
| 272280 | 2 | 0 | 0 | 0 | 0 |
| 273274 | 1 | 0 | 0 | 0 | 0 |
| 274275 | 1 | 0 | 0 | 0 | 0 |
| 274276 | 1 | 0 | 0 | 0 | 0 |
| 274277 | 1 | 0 | 0 | 0 | 0 |
| 277278 | 1 | 0 | 0 | 0 | 0 |
| 277279 | 1 | 0 | 0 | 0 | 0 |
| 277281 | 1 | 0 | 0 | 0 | 0 |
| 281282 | 1 | 0 | 0 | 0 | 0 |
| 281283 | 1 | 0 | 0 | 0 | 0 |
| 281284 | 1 | 0 | 0 | 0 | 0 |
| 284285 | 1 | 0 | 0 | 0 | 0 |
| 284286 | 1 | 0 | 0 | 0 | 0 |
| 287288 | 1 | 0 | 0 | 0 | 0 |









|         |          |          |   |   |   |   |   |   |   |   |   |   |   |   |   |   |   |
|---------|----------|----------|---|---|---|---|---|---|---|---|---|---|---|---|---|---|---|
| 60.0760 | -25.1600 | -23.2090 | H | 0 | 0 | 0 | 0 | 0 | 0 | 0 | 0 | 0 | 0 | 0 | 0 | 0 | 0 |
| 1       | 2        | 1        | 0 | 0 | 0 | 0 |   |   |   |   |   |   |   |   |   |   |   |
| 1       | 3        | 1        | 0 | 0 | 0 | 0 |   |   |   |   |   |   |   |   |   |   |   |
| 1       | 4        | 1        | 0 | 0 | 0 | 0 |   |   |   |   |   |   |   |   |   |   |   |
| 1       | 5        | 1        | 0 | 0 | 0 | 0 |   |   |   |   |   |   |   |   |   |   |   |
| 5       | 6        | 1        | 0 | 0 | 0 | 0 |   |   |   |   |   |   |   |   |   |   |   |
| 5       | 15       | 1        | 0 | 0 | 0 | 0 |   |   |   |   |   |   |   |   |   |   |   |
| 6       | 7        | 1        | 0 | 0 | 0 | 0 |   |   |   |   |   |   |   |   |   |   |   |
| 6       | 8        | 1        | 0 | 0 | 0 | 0 |   |   |   |   |   |   |   |   |   |   |   |
| 6       | 9        | 1        | 0 | 0 | 0 | 0 |   |   |   |   |   |   |   |   |   |   |   |
| 9       | 10       | 1        | 0 | 0 | 0 | 0 |   |   |   |   |   |   |   |   |   |   |   |
| 9       | 11       | 1        | 0 | 0 | 0 | 0 |   |   |   |   |   |   |   |   |   |   |   |
| 9       | 12       | 1        | 0 | 0 | 0 | 0 |   |   |   |   |   |   |   |   |   |   |   |
| 12      | 13       | 1        | 0 | 0 | 0 | 0 |   |   |   |   |   |   |   |   |   |   |   |
| 12      | 14       | 1        | 0 | 0 | 0 | 0 |   |   |   |   |   |   |   |   |   |   |   |
| 12      | 19       | 1        | 0 | 0 | 0 | 0 |   |   |   |   |   |   |   |   |   |   |   |
| 15      | 16       | 1        | 0 | 0 | 0 | 0 |   |   |   |   |   |   |   |   |   |   |   |
| 15      | 17       | 1        | 0 | 0 | 0 | 0 |   |   |   |   |   |   |   |   |   |   |   |
| 15      | 18       | 1        | 0 | 0 | 0 | 0 |   |   |   |   |   |   |   |   |   |   |   |
| 19      | 20       | 1        | 0 | 0 | 0 | 0 |   |   |   |   |   |   |   |   |   |   |   |
| 19      | 36       | 1        | 0 | 0 | 0 | 0 |   |   |   |   |   |   |   |   |   |   |   |
| 21      | 22       | 1        | 0 | 0 | 0 | 0 |   |   |   |   |   |   |   |   |   |   |   |
| 21      | 23       | 1        | 0 | 0 | 0 | 0 |   |   |   |   |   |   |   |   |   |   |   |
| 21      | 24       | 1        | 0 | 0 | 0 | 0 |   |   |   |   |   |   |   |   |   |   |   |
| 21      | 33       | 1        | 0 | 0 | 0 | 0 |   |   |   |   |   |   |   |   |   |   |   |
| 24      | 25       | 1        | 0 | 0 | 0 | 0 |   |   |   |   |   |   |   |   |   |   |   |
| 25      | 26       | 1        | 0 | 0 | 0 | 0 |   |   |   |   |   |   |   |   |   |   |   |
| 25      | 32       | 2        | 0 | 0 | 0 | 0 |   |   |   |   |   |   |   |   |   |   |   |
| 26      | 27       | 1        | 0 | 0 | 0 | 0 |   |   |   |   |   |   |   |   |   |   |   |
| 26      | 28       | 1        | 0 | 0 | 0 | 0 |   |   |   |   |   |   |   |   |   |   |   |
| 26      | 29       | 1        | 0 | 0 | 0 | 0 |   |   |   |   |   |   |   |   |   |   |   |
| 29      | 30       | 1        | 0 | 0 | 0 | 0 |   |   |   |   |   |   |   |   |   |   |   |
| 29      | 31       | 1        | 0 | 0 | 0 | 0 |   |   |   |   |   |   |   |   |   |   |   |
| 29      | 75       | 1        | 0 | 0 | 0 | 0 |   |   |   |   |   |   |   |   |   |   |   |
| 33      | 34       | 1        | 0 | 0 | 0 | 0 |   |   |   |   |   |   |   |   |   |   |   |
| 33      | 35       | 1        | 0 | 0 | 0 | 0 |   |   |   |   |   |   |   |   |   |   |   |
| 33      | 54       | 1        | 0 | 0 | 0 | 0 |   |   |   |   |   |   |   |   |   |   |   |
| 36      | 37       | 1        | 0 | 0 | 0 | 0 |   |   |   |   |   |   |   |   |   |   |   |
| 36      | 38       | 1        | 0 | 0 | 0 | 0 |   |   |   |   |   |   |   |   |   |   |   |
| 36      | 39       | 1        | 0 | 0 | 0 | 0 |   |   |   |   |   |   |   |   |   |   |   |
| 39      | 40       | 1        | 0 | 0 | 0 | 0 |   |   |   |   |   |   |   |   |   |   |   |
| 39      | 41       | 1        | 0 | 0 | 0 | 0 |   |   |   |   |   |   |   |   |   |   |   |
| 39      | 42       | 1        | 0 | 0 | 0 | 0 |   |   |   |   |   |   |   |   |   |   |   |
| 42      | 43       | 1        | 0 | 0 | 0 | 0 |   |   |   |   |   |   |   |   |   |   |   |
| 42      | 50       | 2        | 0 | 0 | 0 | 0 |   |   |   |   |   |   |   |   |   |   |   |
| 43      | 44       | 1        | 0 | 0 | 0 | 0 |   |   |   |   |   |   |   |   |   |   |   |
| 44      | 45       | 1        | 0 | 0 | 0 | 0 |   |   |   |   |   |   |   |   |   |   |   |
| 44      | 46       | 1        | 0 | 0 | 0 | 0 |   |   |   |   |   |   |   |   |   |   |   |
| 44      | 47       | 1        | 0 | 0 | 0 | 0 |   |   |   |   |   |   |   |   |   |   |   |
| 47      | 48       | 1        | 0 | 0 | 0 | 0 |   |   |   |   |   |   |   |   |   |   |   |
| 47      | 49       | 1        | 0 | 0 | 0 | 0 |   |   |   |   |   |   |   |   |   |   |   |
| 47      | 51       | 1        | 0 | 0 | 0 | 0 |   |   |   |   |   |   |   |   |   |   |   |
| 51      | 52       | 1        | 0 | 0 | 0 | 0 |   |   |   |   |   |   |   |   |   |   |   |
| 51      | 53       | 1        | 0 | 0 | 0 | 0 |   |   |   |   |   |   |   |   |   |   |   |
| 51      | 54       | 1        | 0 | 0 | 0 | 0 |   |   |   |   |   |   |   |   |   |   |   |
| 54      | 55       | 1        | 0 | 0 | 0 | 0 |   |   |   |   |   |   |   |   |   |   |   |
| 54      | 56       | 1        | 0 | 0 | 0 | 0 |   |   |   |   |   |   |   |   |   |   |   |
| 57      | 58       | 1        | 0 | 0 | 0 | 0 |   |   |   |   |   |   |   |   |   |   |   |
| 57      | 59       | 1        | 0 | 0 | 0 | 0 |   |   |   |   |   |   |   |   |   |   |   |
| 57      | 60       | 1        | 0 | 0 | 0 | 0 |   |   |   |   |   |   |   |   |   |   |   |
| 57      | 61       | 1        | 0 | 0 | 0 | 0 |   |   |   |   |   |   |   |   |   |   |   |
| 61      | 62       | 1        | 0 | 0 | 0 | 0 |   |   |   |   |   |   |   |   |   |   |   |
| 61      | 71       | 1        | 0 | 0 | 0 | 0 |   |   |   |   |   |   |   |   |   |   |   |
| 62      | 63       | 1        | 0 | 0 | 0 | 0 |   |   |   |   |   |   |   |   |   |   |   |
| 62      | 64       | 1        | 0 | 0 | 0 | 0 |   |   |   |   |   |   |   |   |   |   |   |
| 62      | 65       | 1        | 0 | 0 | 0 | 0 |   |   |   |   |   |   |   |   |   |   |   |
| 65      | 66       | 1        | 0 | 0 | 0 | 0 |   |   |   |   |   |   |   |   |   |   |   |
| 65      | 67       | 1        | 0 | 0 | 0 | 0 |   |   |   |   |   |   |   |   |   |   |   |
| 65      | 68       | 1        | 0 | 0 | 0 | 0 |   |   |   |   |   |   |   |   |   |   |   |
| 68      | 69       | 1        | 0 | 0 | 0 | 0 |   |   |   |   |   |   |   |   |   |   |   |
| 68      | 70       | 1        | 0 | 0 | 0 | 0 |   |   |   |   |   |   |   |   |   |   |   |
| 68      | 75       | 1        | 0 | 0 | 0 | 0 |   |   |   |   |   |   |   |   |   |   |   |
| 71      | 72       | 1        | 0 | 0 | 0 | 0 |   |   |   |   |   |   |   |   |   |   |   |
| 71      | 73       | 1        | 0 | 0 | 0 | 0 |   |   |   |   |   |   |   |   |   |   |   |
| 71      | 74       | 1        | 0 | 0 | 0 | 0 |   |   |   |   |   |   |   |   |   |   |   |
| 75      | 91       | 1        | 0 | 0 | 0 | 0 |   |   |   |   |   |   |   |   |   |   |   |
| 76      | 77       | 1        | 0 | 0 | 0 | 0 |   |   |   |   |   |   |   |   |   |   |   |
| 76      | 78       | 1        | 0 | 0 | 0 | 0 |   |   |   |   |   |   |   |   |   |   |   |
| 76      | 79       | 1        | 0 | 0 | 0 | 0 |   |   |   |   |   |   |   |   |   |   |   |
| 76      | 88       | 1        | 0 | 0 | 0 | 0 |   |   |   |   |   |   |   |   |   |   |   |
| 79      | 80       | 1        | 0 | 0 | 0 | 0 |   |   |   |   |   |   |   |   |   |   |   |

|     |     |   |   |   |   |   |
|-----|-----|---|---|---|---|---|
| 80  | 81  | 1 | 0 | 0 | 0 | 0 |
| 80  | 87  | 2 | 0 | 0 | 0 | 0 |
| 81  | 82  | 1 | 0 | 0 | 0 | 0 |
| 81  | 83  | 1 | 0 | 0 | 0 | 0 |
| 81  | 84  | 1 | 0 | 0 | 0 | 0 |
| 84  | 85  | 1 | 0 | 0 | 0 | 0 |
| 84  | 86  | 1 | 0 | 0 | 0 | 0 |
| 84  | 130 | 1 | 0 | 0 | 0 | 0 |
| 88  | 89  | 1 | 0 | 0 | 0 | 0 |
| 88  | 90  | 1 | 0 | 0 | 0 | 0 |
| 88  | 109 | 1 | 0 | 0 | 0 | 0 |
| 91  | 92  | 1 | 0 | 0 | 0 | 0 |
| 91  | 93  | 1 | 0 | 0 | 0 | 0 |
| 91  | 94  | 1 | 0 | 0 | 0 | 0 |
| 94  | 95  | 1 | 0 | 0 | 0 | 0 |
| 94  | 96  | 1 | 0 | 0 | 0 | 0 |
| 94  | 97  | 1 | 0 | 0 | 0 | 0 |
| 97  | 98  | 1 | 0 | 0 | 0 | 0 |
| 97  | 105 | 2 | 0 | 0 | 0 | 0 |
| 98  | 99  | 1 | 0 | 0 | 0 | 0 |
| 99  | 100 | 1 | 0 | 0 | 0 | 0 |
| 99  | 101 | 1 | 0 | 0 | 0 | 0 |
| 99  | 102 | 1 | 0 | 0 | 0 | 0 |
| 102 | 103 | 1 | 0 | 0 | 0 | 0 |
| 102 | 104 | 1 | 0 | 0 | 0 | 0 |
| 102 | 106 | 1 | 0 | 0 | 0 | 0 |
| 106 | 107 | 1 | 0 | 0 | 0 | 0 |
| 106 | 108 | 1 | 0 | 0 | 0 | 0 |
| 106 | 109 | 1 | 0 | 0 | 0 | 0 |
| 109 | 110 | 1 | 0 | 0 | 0 | 0 |
| 109 | 111 | 1 | 0 | 0 | 0 | 0 |
| 112 | 113 | 1 | 0 | 0 | 0 | 0 |
| 112 | 114 | 1 | 0 | 0 | 0 | 0 |
| 112 | 115 | 1 | 0 | 0 | 0 | 0 |
| 112 | 116 | 1 | 0 | 0 | 0 | 0 |
| 116 | 117 | 1 | 0 | 0 | 0 | 0 |
| 116 | 126 | 1 | 0 | 0 | 0 | 0 |
| 117 | 118 | 1 | 0 | 0 | 0 | 0 |
| 117 | 119 | 1 | 0 | 0 | 0 | 0 |
| 117 | 120 | 1 | 0 | 0 | 0 | 0 |
| 120 | 121 | 1 | 0 | 0 | 0 | 0 |
| 120 | 122 | 1 | 0 | 0 | 0 | 0 |
| 120 | 123 | 1 | 0 | 0 | 0 | 0 |
| 123 | 124 | 1 | 0 | 0 | 0 | 0 |
| 123 | 125 | 1 | 0 | 0 | 0 | 0 |
| 123 | 130 | 1 | 0 | 0 | 0 | 0 |
| 126 | 127 | 1 | 0 | 0 | 0 | 0 |
| 126 | 128 | 1 | 0 | 0 | 0 | 0 |
| 126 | 129 | 1 | 0 | 0 | 0 | 0 |
| 130 | 146 | 1 | 0 | 0 | 0 | 0 |
| 131 | 132 | 1 | 0 | 0 | 0 | 0 |
| 131 | 133 | 1 | 0 | 0 | 0 | 0 |
| 131 | 134 | 1 | 0 | 0 | 0 | 0 |
| 131 | 143 | 1 | 0 | 0 | 0 | 0 |
| 134 | 135 | 1 | 0 | 0 | 0 | 0 |
| 135 | 136 | 1 | 0 | 0 | 0 | 0 |
| 135 | 142 | 2 | 0 | 0 | 0 | 0 |
| 136 | 137 | 1 | 0 | 0 | 0 | 0 |
| 136 | 138 | 1 | 0 | 0 | 0 | 0 |
| 136 | 139 | 1 | 0 | 0 | 0 | 0 |
| 139 | 140 | 1 | 0 | 0 | 0 | 0 |
| 139 | 141 | 1 | 0 | 0 | 0 | 0 |
| 139 | 185 | 1 | 0 | 0 | 0 | 0 |
| 143 | 144 | 1 | 0 | 0 | 0 | 0 |
| 143 | 145 | 1 | 0 | 0 | 0 | 0 |
| 143 | 164 | 1 | 0 | 0 | 0 | 0 |
| 146 | 147 | 1 | 0 | 0 | 0 | 0 |
| 146 | 148 | 1 | 0 | 0 | 0 | 0 |
| 146 | 149 | 1 | 0 | 0 | 0 | 0 |
| 149 | 150 | 1 | 0 | 0 | 0 | 0 |
| 149 | 151 | 1 | 0 | 0 | 0 | 0 |
| 149 | 152 | 1 | 0 | 0 | 0 | 0 |
| 152 | 153 | 1 | 0 | 0 | 0 | 0 |
| 152 | 160 | 2 | 0 | 0 | 0 | 0 |
| 153 | 154 | 1 | 0 | 0 | 0 | 0 |
| 154 | 155 | 1 | 0 | 0 | 0 | 0 |
| 154 | 156 | 1 | 0 | 0 | 0 | 0 |
| 154 | 157 | 1 | 0 | 0 | 0 | 0 |
| 157 | 158 | 1 | 0 | 0 | 0 | 0 |
| 157 | 159 | 1 | 0 | 0 | 0 | 0 |
| 157 | 161 | 1 | 0 | 0 | 0 | 0 |



|        |   |   |   |   |   |
|--------|---|---|---|---|---|
| 161162 | 1 | 0 | 0 | 0 | 0 |
| 161163 | 1 | 0 | 0 | 0 | 0 |
| 161164 | 1 | 0 | 0 | 0 | 0 |
| 164165 | 1 | 0 | 0 | 0 | 0 |
| 164166 | 1 | 0 | 0 | 0 | 0 |
| 167168 | 1 | 0 | 0 | 0 | 0 |
| 167169 | 1 | 0 | 0 | 0 | 0 |
| 167170 | 1 | 0 | 0 | 0 | 0 |
| 167171 | 1 | 0 | 0 | 0 | 0 |
| 171172 | 1 | 0 | 0 | 0 | 0 |
| 171181 | 1 | 0 | 0 | 0 | 0 |
| 172173 | 1 | 0 | 0 | 0 | 0 |
| 172174 | 1 | 0 | 0 | 0 | 0 |
| 172175 | 1 | 0 | 0 | 0 | 0 |
| 175176 | 1 | 0 | 0 | 0 | 0 |
| 175177 | 1 | 0 | 0 | 0 | 0 |
| 175178 | 1 | 0 | 0 | 0 | 0 |
| 178179 | 1 | 0 | 0 | 0 | 0 |
| 178180 | 1 | 0 | 0 | 0 | 0 |
| 178185 | 1 | 0 | 0 | 0 | 0 |
| 181182 | 1 | 0 | 0 | 0 | 0 |
| 181183 | 1 | 0 | 0 | 0 | 0 |
| 181184 | 1 | 0 | 0 | 0 | 0 |
| 185201 | 1 | 0 | 0 | 0 | 0 |
| 186187 | 1 | 0 | 0 | 0 | 0 |
| 186188 | 1 | 0 | 0 | 0 | 0 |
| 186189 | 1 | 0 | 0 | 0 | 0 |
| 186198 | 1 | 0 | 0 | 0 | 0 |
| 189190 | 1 | 0 | 0 | 0 | 0 |
| 190191 | 1 | 0 | 0 | 0 | 0 |
| 190197 | 2 | 0 | 0 | 0 | 0 |
| 191192 | 1 | 0 | 0 | 0 | 0 |
| 191193 | 1 | 0 | 0 | 0 | 0 |
| 191194 | 1 | 0 | 0 | 0 | 0 |
| 194195 | 1 | 0 | 0 | 0 | 0 |
| 194196 | 1 | 0 | 0 | 0 | 0 |
| 194240 | 1 | 0 | 0 | 0 | 0 |
| 198199 | 1 | 0 | 0 | 0 | 0 |
| 198200 | 1 | 0 | 0 | 0 | 0 |
| 198219 | 1 | 0 | 0 | 0 | 0 |
| 201202 | 1 | 0 | 0 | 0 | 0 |
| 201203 | 1 | 0 | 0 | 0 | 0 |
| 201204 | 1 | 0 | 0 | 0 | 0 |
| 204205 | 1 | 0 | 0 | 0 | 0 |
| 204206 | 1 | 0 | 0 | 0 | 0 |
| 204207 | 1 | 0 | 0 | 0 | 0 |
| 207208 | 1 | 0 | 0 | 0 | 0 |
| 207215 | 2 | 0 | 0 | 0 | 0 |
| 208209 | 1 | 0 | 0 | 0 | 0 |
| 209210 | 1 | 0 | 0 | 0 | 0 |
| 209211 | 1 | 0 | 0 | 0 | 0 |
| 209212 | 1 | 0 | 0 | 0 | 0 |
| 212213 | 1 | 0 | 0 | 0 | 0 |
| 212214 | 1 | 0 | 0 | 0 | 0 |
| 212216 | 1 | 0 | 0 | 0 | 0 |
| 216217 | 1 | 0 | 0 | 0 | 0 |
| 216218 | 1 | 0 | 0 | 0 | 0 |
| 216219 | 1 | 0 | 0 | 0 | 0 |
| 219220 | 1 | 0 | 0 | 0 | 0 |
| 219221 | 1 | 0 | 0 | 0 | 0 |
| 222223 | 1 | 0 | 0 | 0 | 0 |
| 222224 | 1 | 0 | 0 | 0 | 0 |
| 222225 | 1 | 0 | 0 | 0 | 0 |
| 222226 | 1 | 0 | 0 | 0 | 0 |
| 226227 | 1 | 0 | 0 | 0 | 0 |
| 226236 | 1 | 0 | 0 | 0 | 0 |
| 227228 | 1 | 0 | 0 | 0 | 0 |
| 227229 | 1 | 0 | 0 | 0 | 0 |
| 227230 | 1 | 0 | 0 | 0 | 0 |
| 230231 | 1 | 0 | 0 | 0 | 0 |
| 230232 | 1 | 0 | 0 | 0 | 0 |
| 230233 | 1 | 0 | 0 | 0 | 0 |
| 233234 | 1 | 0 | 0 | 0 | 0 |
| 233235 | 1 | 0 | 0 | 0 | 0 |
| 233240 | 1 | 0 | 0 | 0 | 0 |
| 236237 | 1 | 0 | 0 | 0 | 0 |
| 236238 | 1 | 0 | 0 | 0 | 0 |
| 236239 | 1 | 0 | 0 | 0 | 0 |
| 240256 | 1 | 0 | 0 | 0 | 0 |
| 241242 | 1 | 0 | 0 | 0 | 0 |
| 241243 | 1 | 0 | 0 | 0 | 0 |

```

241244 1 0 0 0 0
241253 1 0 0 0 0
244245 1 0 0 0 0
245246 1 0 0 0 0
245252 2 0 0 0 0
246247 1 0 0 0 0
246248 1 0 0 0 0
246249 1 0 0 0 0
249250 1 0 0 0 0
249251 1 0 0 0 0
249295 1 0 0 0 0
253254 1 0 0 0 0
253255 1 0 0 0 0
253274 1 0 0 0 0
256257 1 0 0 0 0
256258 1 0 0 0 0
256259 1 0 0 0 0
259260 1 0 0 0 0
259261 1 0 0 0 0
259262 1 0 0 0 0
262263 1 0 0 0 0
262270 2 0 0 0 0
263264 1 0 0 0 0
264265 1 0 0 0 0
264266 1 0 0 0 0
264267 1 0 0 0 0
267268 1 0 0 0 0
267269 1 0 0 0 0
267271 1 0 0 0 0
271272 1 0 0 0 0
271273 1 0 0 0 0
271274 1 0 0 0 0
274275 1 0 0 0 0
274276 1 0 0 0 0
277278 1 0 0 0 0
277279 1 0 0 0 0
277280 1 0 0 0 0
277281 1 0 0 0 0
281282 1 0 0 0 0
281291 1 0 0 0 0
282283 1 0 0 0 0
282284 1 0 0 0 0
282285 1 0 0 0 0
285286 1 0 0 0 0
285287 1 0 0 0 0
285288 1 0 0 0 0
288289 1 0 0 0 0
288290 1 0 0 0 0
288295 1 0 0 0 0
291292 1 0 0 0 0
291293 1 0 0 0 0
291294 1 0 0 0 0
295296 1 0 0 0 0

```

```

M END
> <NAME>
E80_12

```

```

$$$$
E86_12
MOE2012 3D

```

```

326325 0 0 1 0 0 0 0 0 0999 V2000
16.0500 20.6800 -22.0990 C 0 0 0 0 0 0 0 0 0 0 0 0 0 0 0 0
15.2610 20.0850 -22.5790 H 0 0 0 0 0 0 0 0 0 0 0 0 0 0 0 0
15.5280 21.3500 -21.4030 H 0 0 0 0 0 0 0 0 0 0 0 0 0 0 0 0
16.9850 19.7890 -21.3860 N 0 0 0 0 0 0 0 0 0 0 0 0 0 0 0 0
16.2230 18.8080 -20.5840 C 0 0 0 0 0 0 0 0 0 0 0 0 0 0 0 0
15.7000 19.3100 -19.7590 H 0 0 0 0 0 0 0 0 0 0 0 0 0 0 0 0
15.4500 18.3510 -21.2180 H 0 0 0 0 0 0 0 0 0 0 0 0 0 0 0 0
17.0970 17.6570 -20.0430 C 0 0 0 0 0 0 0 0 0 0 0 0 0 0 0 0
17.5900 17.1610 -20.8880 H 0 0 0 0 0 0 0 0 0 0 0 0 0 0 0 0
17.8730 18.0570 -19.3840 H 0 0 0 0 0 0 0 0 0 0 0 0 0 0 0 0
16.2730 16.6900 -19.3100 N 0 0 3 0 0 0 0 0 0 0 0 0 0 0 0 0
15.8360 17.1400 -18.5060 H 0 0 0 0 0 0 0 0 0 0 0 0 0 0 0 0
17.9410 20.5520 -20.5600 C 0 0 0 0 0 0 0 0 0 0 0 0 0 0 0 0
17.7840 21.6360 -20.6320 H 0 0 0 0 0 0 0 0 0 0 0 0 0 0 0 0
17.8220 20.3480 -19.4880 H 0 0 0 0 0 0 0 0 0 0 0 0 0 0 0 0
16.7160 21.4960 -23.2150 C 0 0 0 0 0 0 0 0 0 0 0 0 0 0 0 0
17.4700 22.1840 -22.8220 H 0 0 0 0 0 0 0 0 0 0 0 0 0 0 0 0
17.1900 20.8330 -23.9470 H 0 0 0 0 0 0 0 0 0 0 0 0 0 0 0 0
15.7250 22.2680 -23.8870 O 0 0 0 0 0 0 0 0 0 0 0 0 0 0 0 0

```









|    |     |   |   |   |   |   |
|----|-----|---|---|---|---|---|
| 16 | 17  | 1 | 0 | 0 | 0 | 0 |
| 16 | 18  | 1 | 0 | 0 | 0 | 0 |
| 16 | 19  | 1 | 0 | 0 | 0 | 0 |
| 19 | 20  | 1 | 0 | 0 | 0 | 0 |
| 21 | 22  | 1 | 0 | 0 | 0 | 0 |
| 21 | 23  | 1 | 0 | 0 | 0 | 0 |
| 21 | 24  | 1 | 0 | 0 | 0 | 0 |
| 24 | 25  | 1 | 0 | 0 | 0 | 0 |
| 26 | 27  | 1 | 0 | 0 | 0 | 0 |
| 26 | 28  | 1 | 0 | 0 | 0 | 0 |
| 26 | 29  | 1 | 0 | 0 | 0 | 0 |
| 26 | 38  | 1 | 0 | 0 | 0 | 0 |
| 29 | 30  | 1 | 0 | 0 | 0 | 0 |
| 30 | 31  | 1 | 0 | 0 | 0 | 0 |
| 30 | 37  | 2 | 0 | 0 | 0 | 0 |
| 31 | 32  | 1 | 0 | 0 | 0 | 0 |
| 31 | 33  | 1 | 0 | 0 | 0 | 0 |
| 31 | 34  | 1 | 0 | 0 | 0 | 0 |
| 34 | 35  | 1 | 0 | 0 | 0 | 0 |
| 34 | 36  | 1 | 0 | 0 | 0 | 0 |
| 34 | 72  | 1 | 0 | 0 | 0 | 0 |
| 38 | 39  | 1 | 0 | 0 | 0 | 0 |
| 38 | 40  | 1 | 0 | 0 | 0 | 0 |
| 38 | 59  | 1 | 0 | 0 | 0 | 0 |
| 41 | 42  | 1 | 0 | 0 | 0 | 0 |
| 41 | 43  | 1 | 0 | 0 | 0 | 0 |
| 41 | 44  | 1 | 0 | 0 | 0 | 0 |
| 44 | 45  | 1 | 0 | 0 | 0 | 0 |
| 44 | 46  | 1 | 0 | 0 | 0 | 0 |
| 44 | 47  | 1 | 0 | 0 | 0 | 0 |
| 47 | 48  | 1 | 0 | 0 | 0 | 0 |
| 47 | 55  | 2 | 0 | 0 | 0 | 0 |
| 48 | 49  | 1 | 0 | 0 | 0 | 0 |
| 49 | 50  | 1 | 0 | 0 | 0 | 0 |
| 49 | 51  | 1 | 0 | 0 | 0 | 0 |
| 49 | 52  | 1 | 0 | 0 | 0 | 0 |
| 52 | 53  | 1 | 0 | 0 | 0 | 0 |
| 52 | 54  | 1 | 0 | 0 | 0 | 0 |
| 52 | 56  | 1 | 0 | 0 | 0 | 0 |
| 56 | 57  | 1 | 0 | 0 | 0 | 0 |
| 56 | 58  | 1 | 0 | 0 | 0 | 0 |
| 56 | 59  | 1 | 0 | 0 | 0 | 0 |
| 59 | 60  | 1 | 0 | 0 | 0 | 0 |
| 59 | 61  | 1 | 0 | 0 | 0 | 0 |
| 62 | 63  | 1 | 0 | 0 | 0 | 0 |
| 62 | 64  | 1 | 0 | 0 | 0 | 0 |
| 62 | 65  | 1 | 0 | 0 | 0 | 0 |
| 62 | 76  | 1 | 0 | 0 | 0 | 0 |
| 65 | 66  | 1 | 0 | 0 | 0 | 0 |
| 65 | 73  | 1 | 0 | 0 | 0 | 0 |
| 66 | 67  | 1 | 0 | 0 | 0 | 0 |
| 66 | 68  | 1 | 0 | 0 | 0 | 0 |
| 66 | 69  | 1 | 0 | 0 | 0 | 0 |
| 69 | 70  | 1 | 0 | 0 | 0 | 0 |
| 69 | 71  | 1 | 0 | 0 | 0 | 0 |
| 69 | 72  | 1 | 0 | 0 | 0 | 0 |
| 72 | 101 | 1 | 0 | 0 | 0 | 0 |
| 73 | 74  | 1 | 0 | 0 | 0 | 0 |
| 73 | 75  | 1 | 0 | 0 | 0 | 0 |
| 73 | 81  | 1 | 0 | 0 | 0 | 0 |
| 76 | 77  | 1 | 0 | 0 | 0 | 0 |
| 76 | 78  | 1 | 0 | 0 | 0 | 0 |
| 76 | 79  | 1 | 0 | 0 | 0 | 0 |
| 79 | 80  | 1 | 0 | 0 | 0 | 0 |
| 81 | 82  | 1 | 0 | 0 | 0 | 0 |
| 81 | 83  | 1 | 0 | 0 | 0 | 0 |
| 81 | 84  | 1 | 0 | 0 | 0 | 0 |
| 84 | 85  | 1 | 0 | 0 | 0 | 0 |
| 86 | 87  | 1 | 0 | 0 | 0 | 0 |
| 86 | 88  | 1 | 0 | 0 | 0 | 0 |
| 86 | 89  | 1 | 0 | 0 | 0 | 0 |
| 86 | 98  | 1 | 0 | 0 | 0 | 0 |
| 89 | 90  | 1 | 0 | 0 | 0 | 0 |
| 90 | 91  | 1 | 0 | 0 | 0 | 0 |
| 90 | 97  | 2 | 0 | 0 | 0 | 0 |
| 91 | 92  | 1 | 0 | 0 | 0 | 0 |
| 91 | 93  | 1 | 0 | 0 | 0 | 0 |
| 91 | 94  | 1 | 0 | 0 | 0 | 0 |
| 94 | 95  | 1 | 0 | 0 | 0 | 0 |
| 94 | 96  | 1 | 0 | 0 | 0 | 0 |
| 94 | 132 | 1 | 0 | 0 | 0 | 0 |

|        |   |   |   |   |   |
|--------|---|---|---|---|---|
| 98 99  | 1 | 0 | 0 | 0 | 0 |
| 98100  | 1 | 0 | 0 | 0 | 0 |
| 98119  | 1 | 0 | 0 | 0 | 0 |
| 101102 | 1 | 0 | 0 | 0 | 0 |
| 101103 | 1 | 0 | 0 | 0 | 0 |
| 101104 | 1 | 0 | 0 | 0 | 0 |
| 104105 | 1 | 0 | 0 | 0 | 0 |
| 104106 | 1 | 0 | 0 | 0 | 0 |
| 104107 | 1 | 0 | 0 | 0 | 0 |
| 107108 | 1 | 0 | 0 | 0 | 0 |
| 107115 | 2 | 0 | 0 | 0 | 0 |
| 108109 | 1 | 0 | 0 | 0 | 0 |
| 109110 | 1 | 0 | 0 | 0 | 0 |
| 109111 | 1 | 0 | 0 | 0 | 0 |
| 109112 | 1 | 0 | 0 | 0 | 0 |
| 112113 | 1 | 0 | 0 | 0 | 0 |
| 112114 | 1 | 0 | 0 | 0 | 0 |
| 112116 | 1 | 0 | 0 | 0 | 0 |
| 116117 | 1 | 0 | 0 | 0 | 0 |
| 116118 | 1 | 0 | 0 | 0 | 0 |
| 116119 | 1 | 0 | 0 | 0 | 0 |
| 119120 | 1 | 0 | 0 | 0 | 0 |
| 119121 | 1 | 0 | 0 | 0 | 0 |
| 122123 | 1 | 0 | 0 | 0 | 0 |
| 122124 | 1 | 0 | 0 | 0 | 0 |
| 122125 | 1 | 0 | 0 | 0 | 0 |
| 122136 | 1 | 0 | 0 | 0 | 0 |
| 125126 | 1 | 0 | 0 | 0 | 0 |
| 125133 | 1 | 0 | 0 | 0 | 0 |
| 126127 | 1 | 0 | 0 | 0 | 0 |
| 126128 | 1 | 0 | 0 | 0 | 0 |
| 126129 | 1 | 0 | 0 | 0 | 0 |
| 129130 | 1 | 0 | 0 | 0 | 0 |
| 129131 | 1 | 0 | 0 | 0 | 0 |
| 129132 | 1 | 0 | 0 | 0 | 0 |
| 132161 | 1 | 0 | 0 | 0 | 0 |
| 133134 | 1 | 0 | 0 | 0 | 0 |
| 133135 | 1 | 0 | 0 | 0 | 0 |
| 133141 | 1 | 0 | 0 | 0 | 0 |
| 136137 | 1 | 0 | 0 | 0 | 0 |
| 136138 | 1 | 0 | 0 | 0 | 0 |
| 136139 | 1 | 0 | 0 | 0 | 0 |
| 139140 | 1 | 0 | 0 | 0 | 0 |
| 141142 | 1 | 0 | 0 | 0 | 0 |
| 141143 | 1 | 0 | 0 | 0 | 0 |
| 141144 | 1 | 0 | 0 | 0 | 0 |
| 144145 | 1 | 0 | 0 | 0 | 0 |
| 146147 | 1 | 0 | 0 | 0 | 0 |
| 146148 | 1 | 0 | 0 | 0 | 0 |
| 146149 | 1 | 0 | 0 | 0 | 0 |
| 146158 | 1 | 0 | 0 | 0 | 0 |
| 149150 | 1 | 0 | 0 | 0 | 0 |
| 150151 | 1 | 0 | 0 | 0 | 0 |
| 150157 | 2 | 0 | 0 | 0 | 0 |
| 151152 | 1 | 0 | 0 | 0 | 0 |
| 151153 | 1 | 0 | 0 | 0 | 0 |
| 151154 | 1 | 0 | 0 | 0 | 0 |
| 154155 | 1 | 0 | 0 | 0 | 0 |
| 154156 | 1 | 0 | 0 | 0 | 0 |
| 154192 | 1 | 0 | 0 | 0 | 0 |
| 158159 | 1 | 0 | 0 | 0 | 0 |
| 158160 | 1 | 0 | 0 | 0 | 0 |
| 158179 | 1 | 0 | 0 | 0 | 0 |
| 161162 | 1 | 0 | 0 | 0 | 0 |
| 161163 | 1 | 0 | 0 | 0 | 0 |
| 161164 | 1 | 0 | 0 | 0 | 0 |
| 164165 | 1 | 0 | 0 | 0 | 0 |
| 164166 | 1 | 0 | 0 | 0 | 0 |
| 164167 | 1 | 0 | 0 | 0 | 0 |
| 167168 | 1 | 0 | 0 | 0 | 0 |
| 167175 | 2 | 0 | 0 | 0 | 0 |
| 168169 | 1 | 0 | 0 | 0 | 0 |
| 169170 | 1 | 0 | 0 | 0 | 0 |
| 169171 | 1 | 0 | 0 | 0 | 0 |
| 169172 | 1 | 0 | 0 | 0 | 0 |
| 172173 | 1 | 0 | 0 | 0 | 0 |
| 172174 | 1 | 0 | 0 | 0 | 0 |
| 172176 | 1 | 0 | 0 | 0 | 0 |
| 176177 | 1 | 0 | 0 | 0 | 0 |
| 176178 | 1 | 0 | 0 | 0 | 0 |
| 176179 | 1 | 0 | 0 | 0 | 0 |



|        |   |   |   |   |   |
|--------|---|---|---|---|---|
| 179180 | 1 | 0 | 0 | 0 | 0 |
| 179181 | 1 | 0 | 0 | 0 | 0 |
| 182183 | 1 | 0 | 0 | 0 | 0 |
| 182184 | 1 | 0 | 0 | 0 | 0 |
| 182185 | 1 | 0 | 0 | 0 | 0 |
| 182196 | 1 | 0 | 0 | 0 | 0 |
| 185186 | 1 | 0 | 0 | 0 | 0 |
| 185193 | 1 | 0 | 0 | 0 | 0 |
| 186187 | 1 | 0 | 0 | 0 | 0 |
| 186188 | 1 | 0 | 0 | 0 | 0 |
| 186189 | 1 | 0 | 0 | 0 | 0 |
| 189190 | 1 | 0 | 0 | 0 | 0 |
| 189191 | 1 | 0 | 0 | 0 | 0 |
| 189192 | 1 | 0 | 0 | 0 | 0 |
| 192221 | 1 | 0 | 0 | 0 | 0 |
| 193194 | 1 | 0 | 0 | 0 | 0 |
| 193195 | 1 | 0 | 0 | 0 | 0 |
| 193201 | 1 | 0 | 0 | 0 | 0 |
| 196197 | 1 | 0 | 0 | 0 | 0 |
| 196198 | 1 | 0 | 0 | 0 | 0 |
| 196199 | 1 | 0 | 0 | 0 | 0 |
| 199200 | 1 | 0 | 0 | 0 | 0 |
| 201202 | 1 | 0 | 0 | 0 | 0 |
| 201203 | 1 | 0 | 0 | 0 | 0 |
| 201204 | 1 | 0 | 0 | 0 | 0 |
| 204205 | 1 | 0 | 0 | 0 | 0 |
| 206207 | 1 | 0 | 0 | 0 | 0 |
| 206208 | 1 | 0 | 0 | 0 | 0 |
| 206209 | 1 | 0 | 0 | 0 | 0 |
| 206218 | 1 | 0 | 0 | 0 | 0 |
| 209210 | 1 | 0 | 0 | 0 | 0 |
| 210211 | 1 | 0 | 0 | 0 | 0 |
| 210217 | 2 | 0 | 0 | 0 | 0 |
| 211212 | 1 | 0 | 0 | 0 | 0 |
| 211213 | 1 | 0 | 0 | 0 | 0 |
| 211214 | 1 | 0 | 0 | 0 | 0 |
| 214215 | 1 | 0 | 0 | 0 | 0 |
| 214216 | 1 | 0 | 0 | 0 | 0 |
| 214252 | 1 | 0 | 0 | 0 | 0 |
| 218219 | 1 | 0 | 0 | 0 | 0 |
| 218220 | 1 | 0 | 0 | 0 | 0 |
| 218239 | 1 | 0 | 0 | 0 | 0 |
| 221222 | 1 | 0 | 0 | 0 | 0 |
| 221223 | 1 | 0 | 0 | 0 | 0 |
| 221224 | 1 | 0 | 0 | 0 | 0 |
| 224225 | 1 | 0 | 0 | 0 | 0 |
| 224226 | 1 | 0 | 0 | 0 | 0 |
| 224227 | 1 | 0 | 0 | 0 | 0 |
| 227228 | 1 | 0 | 0 | 0 | 0 |
| 227235 | 2 | 0 | 0 | 0 | 0 |
| 228229 | 1 | 0 | 0 | 0 | 0 |
| 229230 | 1 | 0 | 0 | 0 | 0 |
| 229231 | 1 | 0 | 0 | 0 | 0 |
| 229232 | 1 | 0 | 0 | 0 | 0 |
| 232233 | 1 | 0 | 0 | 0 | 0 |
| 232234 | 1 | 0 | 0 | 0 | 0 |
| 232236 | 1 | 0 | 0 | 0 | 0 |
| 236237 | 1 | 0 | 0 | 0 | 0 |
| 236238 | 1 | 0 | 0 | 0 | 0 |
| 236239 | 1 | 0 | 0 | 0 | 0 |
| 239240 | 1 | 0 | 0 | 0 | 0 |
| 239241 | 1 | 0 | 0 | 0 | 0 |
| 242243 | 1 | 0 | 0 | 0 | 0 |
| 242244 | 1 | 0 | 0 | 0 | 0 |
| 242245 | 1 | 0 | 0 | 0 | 0 |
| 242256 | 1 | 0 | 0 | 0 | 0 |
| 245246 | 1 | 0 | 0 | 0 | 0 |
| 245253 | 1 | 0 | 0 | 0 | 0 |
| 246247 | 1 | 0 | 0 | 0 | 0 |
| 246248 | 1 | 0 | 0 | 0 | 0 |
| 246249 | 1 | 0 | 0 | 0 | 0 |
| 249250 | 1 | 0 | 0 | 0 | 0 |
| 249251 | 1 | 0 | 0 | 0 | 0 |
| 249252 | 1 | 0 | 0 | 0 | 0 |
| 252281 | 1 | 0 | 0 | 0 | 0 |
| 253254 | 1 | 0 | 0 | 0 | 0 |
| 253255 | 1 | 0 | 0 | 0 | 0 |
| 253261 | 1 | 0 | 0 | 0 | 0 |
| 256257 | 1 | 0 | 0 | 0 | 0 |
| 256258 | 1 | 0 | 0 | 0 | 0 |
| 256259 | 1 | 0 | 0 | 0 | 0 |

259260 1 0 0 0 0  
 261262 1 0 0 0 0  
 261263 1 0 0 0 0  
 261264 1 0 0 0 0  
 264265 1 0 0 0 0  
 266267 1 0 0 0 0  
 266268 1 0 0 0 0  
 266269 1 0 0 0 0  
 266278 1 0 0 0 0  
 269270 1 0 0 0 0  
 270271 1 0 0 0 0  
 270277 2 0 0 0 0  
 271272 1 0 0 0 0  
 271273 1 0 0 0 0  
 271274 1 0 0 0 0  
 274275 1 0 0 0 0  
 274276 1 0 0 0 0  
 274312 1 0 0 0 0  
 278279 1 0 0 0 0  
 278280 1 0 0 0 0  
 278299 1 0 0 0 0  
 281282 1 0 0 0 0  
 281283 1 0 0 0 0  
 281284 1 0 0 0 0  
 284285 1 0 0 0 0  
 284286 1 0 0 0 0  
 284287 1 0 0 0 0  
 287288 1 0 0 0 0  
 287295 2 0 0 0 0  
 288289 1 0 0 0 0  
 289290 1 0 0 0 0  
 289291 1 0 0 0 0  
 289292 1 0 0 0 0  
 292293 1 0 0 0 0  
 292294 1 0 0 0 0  
 292296 1 0 0 0 0  
 296297 1 0 0 0 0  
 296298 1 0 0 0 0  
 296299 1 0 0 0 0  
 299300 1 0 0 0 0  
 299301 1 0 0 0 0  
 302303 1 0 0 0 0  
 302304 1 0 0 0 0  
 302305 1 0 0 0 0  
 302317 1 0 0 0 0  
 305306 1 0 0 0 0  
 305314 1 0 0 0 0  
 306307 1 0 0 0 0  
 306308 1 0 0 0 0  
 306309 1 0 0 0 0  
 309310 1 0 0 0 0  
 309311 1 0 0 0 0  
 309312 1 0 0 0 0  
 312313 1 0 0 0 0  
 314315 1 0 0 0 0  
 314316 1 0 0 0 0  
 314322 1 0 0 0 0  
 317318 1 0 0 0 0  
 317319 1 0 0 0 0  
 317320 1 0 0 0 0  
 320321 1 0 0 0 0  
 322323 1 0 0 0 0  
 322324 1 0 0 0 0  
 322325 1 0 0 0 0  
 325326 1 0 0 0 0

M END  
 > <NAME>  
 E86\_12

\$\$\$  
 E94\_12  
 MOE2012 3D

| 272277  | 0       | 0      | 1 | 0 | 0 | 0 | 0 | 0999 | V2000 |   |   |   |   |   |   |   |   |   |   |
|---------|---------|--------|---|---|---|---|---|------|-------|---|---|---|---|---|---|---|---|---|---|
| 22.4050 | 30.8210 | 7.9880 | N | 0 | 0 | 0 | 0 | 0    | 0     | 0 | 0 | 0 | 0 | 0 | 0 | 0 | 0 | 0 | 0 |
| 21.2590 | 31.5290 | 7.7560 | C | 0 | 0 | 0 | 0 | 0    | 0     | 0 | 0 | 0 | 0 | 0 | 0 | 0 | 0 | 0 | 0 |
| 20.2960 | 31.0590 | 7.6200 | H | 0 | 0 | 0 | 0 | 0    | 0     | 0 | 0 | 0 | 0 | 0 | 0 | 0 | 0 | 0 | 0 |
| 21.6560 | 32.8470 | 7.7550 | C | 0 | 0 | 0 | 0 | 0    | 0     | 0 | 0 | 0 | 0 | 0 | 0 | 0 | 0 | 0 | 0 |
| 21.0400 | 33.7240 | 7.6080 | H | 0 | 0 | 0 | 0 | 0    | 0     | 0 | 0 | 0 | 0 | 0 | 0 | 0 | 0 | 0 | 0 |
| 23.0060 | 32.9530 | 7.9750 | N | 0 | 0 | 0 | 0 | 0    | 0     | 0 | 0 | 0 | 0 | 0 | 0 | 0 | 0 | 0 | 0 |
| 23.4290 | 31.7160 | 8.1100 | C | 0 | 0 | 0 | 0 | 0    | 0     | 0 | 0 | 0 | 0 | 0 | 0 | 0 | 0 | 0 | 0 |







|         |         |         |   |   |   |   |   |   |   |   |   |   |   |   |   |
|---------|---------|---------|---|---|---|---|---|---|---|---|---|---|---|---|---|
| 68.4770 | 25.5560 | 1.9440  | C | 0 | 0 | 0 | 0 | 0 | 0 | 0 | 0 | 0 | 0 | 0 | 0 |
| 69.1940 | 25.4490 | 2.7670  | H | 0 | 0 | 0 | 0 | 0 | 0 | 0 | 0 | 0 | 0 | 0 | 0 |
| 69.0030 | 26.0510 | 1.1190  | H | 0 | 0 | 0 | 0 | 0 | 0 | 0 | 0 | 0 | 0 | 0 | 0 |
| 67.3020 | 26.4240 | 2.3980  | C | 0 | 0 | 0 | 0 | 0 | 0 | 0 | 0 | 0 | 0 | 0 | 0 |
| 66.7740 | 25.9260 | 3.2200  | H | 0 | 0 | 0 | 0 | 0 | 0 | 0 | 0 | 0 | 0 | 0 | 0 |
| 66.5860 | 26.5330 | 1.5730  | H | 0 | 0 | 0 | 0 | 0 | 0 | 0 | 0 | 0 | 0 | 0 | 0 |
| 68.4990 | 36.0290 | 7.9580  | N | 0 | 0 | 0 | 0 | 0 | 0 | 0 | 0 | 0 | 0 | 0 | 0 |
| 69.8530 | 35.8740 | 8.0500  | C | 0 | 0 | 0 | 0 | 0 | 0 | 0 | 0 | 0 | 0 | 0 | 0 |
| 70.4800 | 35.6490 | 7.1980  | H | 0 | 0 | 0 | 0 | 0 | 0 | 0 | 0 | 0 | 0 | 0 | 0 |
| 70.1390 | 36.0740 | 9.3810  | C | 0 | 0 | 0 | 0 | 0 | 0 | 0 | 0 | 0 | 0 | 0 | 0 |
| 71.1060 | 36.0410 | 9.8640  | H | 0 | 0 | 0 | 0 | 0 | 0 | 0 | 0 | 0 | 0 | 0 | 0 |
| 68.9980 | 36.3420 | 10.0940 | N | 0 | 0 | 0 | 0 | 0 | 0 | 0 | 0 | 0 | 0 | 0 | 0 |
| 68.0260 | 36.3060 | 9.2090  | C | 0 | 0 | 0 | 0 | 0 | 0 | 0 | 0 | 0 | 0 | 0 | 0 |
| 66.9780 | 36.4720 | 9.4180  | H | 0 | 0 | 0 | 0 | 0 | 0 | 0 | 0 | 0 | 0 | 0 | 0 |
| 67.7040 | 35.9290 | 6.7500  | C | 0 | 0 | 0 | 0 | 0 | 0 | 0 | 0 | 0 | 0 | 0 | 0 |
| 66.8810 | 36.6480 | 6.8410  | H | 0 | 0 | 0 | 0 | 0 | 0 | 0 | 0 | 0 | 0 | 0 | 0 |
| 68.3350 | 36.2520 | 5.9130  | H | 0 | 0 | 0 | 0 | 0 | 0 | 0 | 0 | 0 | 0 | 0 | 0 |
| 67.1730 | 34.5100 | 6.5200  | C | 0 | 0 | 0 | 0 | 0 | 0 | 0 | 0 | 0 | 0 | 0 | 0 |
| 68.0230 | 33.8220 | 6.4510  | H | 0 | 0 | 0 | 0 | 0 | 0 | 0 | 0 | 0 | 0 | 0 | 0 |
| 66.5660 | 34.2010 | 7.3800  | H | 0 | 0 | 0 | 0 | 0 | 0 | 0 | 0 | 0 | 0 | 0 | 0 |
| 66.3710 | 34.4630 | 5.2930  | N | 0 | 0 | 3 | 0 | 0 | 0 | 0 | 0 | 0 | 0 | 0 | 0 |
| 65.6040 | 35.1340 | 5.3680  | H | 0 | 0 | 0 | 0 | 0 | 0 | 0 | 0 | 0 | 0 | 0 | 0 |
| 1       | 2       | 1       | 0 | 0 | 0 | 0 | 0 | 0 | 0 | 0 | 0 | 0 | 0 | 0 | 0 |
| 1       | 7       | 1       | 0 | 0 | 0 | 0 | 0 | 0 | 0 | 0 | 0 | 0 | 0 | 0 | 0 |
| 1       | 9       | 1       | 0 | 0 | 0 | 0 | 0 | 0 | 0 | 0 | 0 | 0 | 0 | 0 | 0 |
| 2       | 3       | 1       | 0 | 0 | 0 | 0 | 0 | 0 | 0 | 0 | 0 | 0 | 0 | 0 | 0 |
| 2       | 4       | 2       | 0 | 0 | 0 | 0 | 0 | 0 | 0 | 0 | 0 | 0 | 0 | 0 | 0 |
| 4       | 5       | 1       | 0 | 0 | 0 | 0 | 0 | 0 | 0 | 0 | 0 | 0 | 0 | 0 | 0 |
| 4       | 6       | 1       | 0 | 0 | 0 | 0 | 0 | 0 | 0 | 0 | 0 | 0 | 0 | 0 | 0 |
| 6       | 7       | 2       | 0 | 0 | 0 | 0 | 0 | 0 | 0 | 0 | 0 | 0 | 0 | 0 | 0 |
| 7       | 8       | 1       | 0 | 0 | 0 | 0 | 0 | 0 | 0 | 0 | 0 | 0 | 0 | 0 | 0 |
| 9       | 10      | 1       | 0 | 0 | 0 | 0 | 0 | 0 | 0 | 0 | 0 | 0 | 0 | 0 | 0 |
| 9       | 11      | 1       | 0 | 0 | 0 | 0 | 0 | 0 | 0 | 0 | 0 | 0 | 0 | 0 | 0 |
| 9       | 12      | 1       | 0 | 0 | 0 | 0 | 0 | 0 | 0 | 0 | 0 | 0 | 0 | 0 | 0 |
| 12      | 13      | 1       | 0 | 0 | 0 | 0 | 0 | 0 | 0 | 0 | 0 | 0 | 0 | 0 | 0 |
| 12      | 14      | 1       | 0 | 0 | 0 | 0 | 0 | 0 | 0 | 0 | 0 | 0 | 0 | 0 | 0 |
| 12      | 15      | 1       | 0 | 0 | 0 | 0 | 0 | 0 | 0 | 0 | 0 | 0 | 0 | 0 | 0 |
| 15      | 16      | 1       | 0 | 0 | 0 | 0 | 0 | 0 | 0 | 0 | 0 | 0 | 0 | 0 | 0 |
| 15      | 32      | 1       | 0 | 0 | 0 | 0 | 0 | 0 | 0 | 0 | 0 | 0 | 0 | 0 | 0 |
| 17      | 18      | 1       | 0 | 0 | 0 | 0 | 0 | 0 | 0 | 0 | 0 | 0 | 0 | 0 | 0 |
| 17      | 19      | 1       | 0 | 0 | 0 | 0 | 0 | 0 | 0 | 0 | 0 | 0 | 0 | 0 | 0 |
| 17      | 20      | 1       | 0 | 0 | 0 | 0 | 0 | 0 | 0 | 0 | 0 | 0 | 0 | 0 | 0 |
| 17      | 29      | 1       | 0 | 0 | 0 | 0 | 0 | 0 | 0 | 0 | 0 | 0 | 0 | 0 | 0 |
| 20      | 21      | 1       | 0 | 0 | 0 | 0 | 0 | 0 | 0 | 0 | 0 | 0 | 0 | 0 | 0 |
| 21      | 22      | 1       | 0 | 0 | 0 | 0 | 0 | 0 | 0 | 0 | 0 | 0 | 0 | 0 | 0 |
| 21      | 28      | 2       | 0 | 0 | 0 | 0 | 0 | 0 | 0 | 0 | 0 | 0 | 0 | 0 | 0 |
| 22      | 23      | 1       | 0 | 0 | 0 | 0 | 0 | 0 | 0 | 0 | 0 | 0 | 0 | 0 | 0 |
| 22      | 24      | 1       | 0 | 0 | 0 | 0 | 0 | 0 | 0 | 0 | 0 | 0 | 0 | 0 | 0 |
| 22      | 25      | 1       | 0 | 0 | 0 | 0 | 0 | 0 | 0 | 0 | 0 | 0 | 0 | 0 | 0 |
| 25      | 26      | 1       | 0 | 0 | 0 | 0 | 0 | 0 | 0 | 0 | 0 | 0 | 0 | 0 | 0 |
| 25      | 27      | 1       | 0 | 0 | 0 | 0 | 0 | 0 | 0 | 0 | 0 | 0 | 0 | 0 | 0 |
| 25      | 67      | 1       | 0 | 0 | 0 | 0 | 0 | 0 | 0 | 0 | 0 | 0 | 0 | 0 | 0 |
| 29      | 30      | 1       | 0 | 0 | 0 | 0 | 0 | 0 | 0 | 0 | 0 | 0 | 0 | 0 | 0 |
| 29      | 31      | 1       | 0 | 0 | 0 | 0 | 0 | 0 | 0 | 0 | 0 | 0 | 0 | 0 | 0 |
| 29      | 50      | 1       | 0 | 0 | 0 | 0 | 0 | 0 | 0 | 0 | 0 | 0 | 0 | 0 | 0 |
| 32      | 33      | 1       | 0 | 0 | 0 | 0 | 0 | 0 | 0 | 0 | 0 | 0 | 0 | 0 | 0 |
| 32      | 34      | 1       | 0 | 0 | 0 | 0 | 0 | 0 | 0 | 0 | 0 | 0 | 0 | 0 | 0 |
| 32      | 35      | 1       | 0 | 0 | 0 | 0 | 0 | 0 | 0 | 0 | 0 | 0 | 0 | 0 | 0 |
| 35      | 36      | 1       | 0 | 0 | 0 | 0 | 0 | 0 | 0 | 0 | 0 | 0 | 0 | 0 | 0 |
| 35      | 37      | 1       | 0 | 0 | 0 | 0 | 0 | 0 | 0 | 0 | 0 | 0 | 0 | 0 | 0 |
| 35      | 38      | 1       | 0 | 0 | 0 | 0 | 0 | 0 | 0 | 0 | 0 | 0 | 0 | 0 | 0 |
| 38      | 39      | 1       | 0 | 0 | 0 | 0 | 0 | 0 | 0 | 0 | 0 | 0 | 0 | 0 | 0 |
| 38      | 46      | 2       | 0 | 0 | 0 | 0 | 0 | 0 | 0 | 0 | 0 | 0 | 0 | 0 | 0 |
| 39      | 40      | 1       | 0 | 0 | 0 | 0 | 0 | 0 | 0 | 0 | 0 | 0 | 0 | 0 | 0 |
| 40      | 41      | 1       | 0 | 0 | 0 | 0 | 0 | 0 | 0 | 0 | 0 | 0 | 0 | 0 | 0 |
| 40      | 42      | 1       | 0 | 0 | 0 | 0 | 0 | 0 | 0 | 0 | 0 | 0 | 0 | 0 | 0 |
| 40      | 43      | 1       | 0 | 0 | 0 | 0 | 0 | 0 | 0 | 0 | 0 | 0 | 0 | 0 | 0 |
| 43      | 44      | 1       | 0 | 0 | 0 | 0 | 0 | 0 | 0 | 0 | 0 | 0 | 0 | 0 | 0 |
| 43      | 45      | 1       | 0 | 0 | 0 | 0 | 0 | 0 | 0 | 0 | 0 | 0 | 0 | 0 | 0 |
| 43      | 47      | 1       | 0 | 0 | 0 | 0 | 0 | 0 | 0 | 0 | 0 | 0 | 0 | 0 | 0 |
| 47      | 48      | 1       | 0 | 0 | 0 | 0 | 0 | 0 | 0 | 0 | 0 | 0 | 0 | 0 | 0 |
| 47      | 49      | 1       | 0 | 0 | 0 | 0 | 0 | 0 | 0 | 0 | 0 | 0 | 0 | 0 | 0 |
| 47      | 50      | 1       | 0 | 0 | 0 | 0 | 0 | 0 | 0 | 0 | 0 | 0 | 0 | 0 | 0 |
| 50      | 51      | 1       | 0 | 0 | 0 | 0 | 0 | 0 | 0 | 0 | 0 | 0 | 0 | 0 | 0 |
| 50      | 52      | 1       | 0 | 0 | 0 | 0 | 0 | 0 | 0 | 0 | 0 | 0 | 0 | 0 | 0 |
| 53      | 54      | 1       | 0 | 0 | 0 | 0 | 0 | 0 | 0 | 0 | 0 | 0 | 0 | 0 | 0 |
| 53      | 59      | 1       | 0 | 0 | 0 | 0 | 0 | 0 | 0 | 0 | 0 | 0 | 0 | 0 | 0 |
| 53      | 61      | 1       | 0 | 0 | 0 | 0 | 0 | 0 | 0 | 0 | 0 | 0 | 0 | 0 | 0 |
| 54      | 55      | 1       | 0 | 0 | 0 | 0 | 0 | 0 | 0 | 0 | 0 | 0 | 0 | 0 | 0 |
| 54      | 56      | 2       | 0 | 0 | 0 | 0 | 0 | 0 | 0 | 0 | 0 | 0 | 0 | 0 | 0 |
| 56      | 57      | 1       | 0 | 0 | 0 | 0 | 0 | 0 | 0 | 0 | 0 | 0 | 0 | 0 | 0 |

|     |     |   |   |   |   |   |
|-----|-----|---|---|---|---|---|
| 56  | 58  | 1 | 0 | 0 | 0 | 0 |
| 58  | 59  | 2 | 0 | 0 | 0 | 0 |
| 59  | 60  | 1 | 0 | 0 | 0 | 0 |
| 61  | 62  | 1 | 0 | 0 | 0 | 0 |
| 61  | 63  | 1 | 0 | 0 | 0 | 0 |
| 61  | 64  | 1 | 0 | 0 | 0 | 0 |
| 64  | 65  | 1 | 0 | 0 | 0 | 0 |
| 64  | 66  | 1 | 0 | 0 | 0 | 0 |
| 64  | 67  | 1 | 0 | 0 | 0 | 0 |
| 67  | 83  | 1 | 0 | 0 | 0 | 0 |
| 68  | 69  | 1 | 0 | 0 | 0 | 0 |
| 68  | 70  | 1 | 0 | 0 | 0 | 0 |
| 68  | 71  | 1 | 0 | 0 | 0 | 0 |
| 68  | 80  | 1 | 0 | 0 | 0 | 0 |
| 71  | 72  | 1 | 0 | 0 | 0 | 0 |
| 72  | 73  | 1 | 0 | 0 | 0 | 0 |
| 72  | 79  | 2 | 0 | 0 | 0 | 0 |
| 73  | 74  | 1 | 0 | 0 | 0 | 0 |
| 73  | 75  | 1 | 0 | 0 | 0 | 0 |
| 73  | 76  | 1 | 0 | 0 | 0 | 0 |
| 76  | 77  | 1 | 0 | 0 | 0 | 0 |
| 76  | 78  | 1 | 0 | 0 | 0 | 0 |
| 76  | 118 | 1 | 0 | 0 | 0 | 0 |
| 80  | 81  | 1 | 0 | 0 | 0 | 0 |
| 80  | 82  | 1 | 0 | 0 | 0 | 0 |
| 80  | 101 | 1 | 0 | 0 | 0 | 0 |
| 83  | 84  | 1 | 0 | 0 | 0 | 0 |
| 83  | 85  | 1 | 0 | 0 | 0 | 0 |
| 83  | 86  | 1 | 0 | 0 | 0 | 0 |
| 86  | 87  | 1 | 0 | 0 | 0 | 0 |
| 86  | 88  | 1 | 0 | 0 | 0 | 0 |
| 86  | 89  | 1 | 0 | 0 | 0 | 0 |
| 89  | 90  | 1 | 0 | 0 | 0 | 0 |
| 89  | 97  | 2 | 0 | 0 | 0 | 0 |
| 90  | 91  | 1 | 0 | 0 | 0 | 0 |
| 91  | 92  | 1 | 0 | 0 | 0 | 0 |
| 91  | 93  | 1 | 0 | 0 | 0 | 0 |
| 91  | 94  | 1 | 0 | 0 | 0 | 0 |
| 94  | 95  | 1 | 0 | 0 | 0 | 0 |
| 94  | 96  | 1 | 0 | 0 | 0 | 0 |
| 94  | 98  | 1 | 0 | 0 | 0 | 0 |
| 98  | 99  | 1 | 0 | 0 | 0 | 0 |
| 98  | 100 | 1 | 0 | 0 | 0 | 0 |
| 98  | 101 | 1 | 0 | 0 | 0 | 0 |
| 101 | 102 | 1 | 0 | 0 | 0 | 0 |
| 101 | 103 | 1 | 0 | 0 | 0 | 0 |
| 104 | 105 | 1 | 0 | 0 | 0 | 0 |
| 104 | 110 | 1 | 0 | 0 | 0 | 0 |
| 104 | 112 | 1 | 0 | 0 | 0 | 0 |
| 105 | 106 | 1 | 0 | 0 | 0 | 0 |
| 105 | 107 | 2 | 0 | 0 | 0 | 0 |
| 107 | 108 | 1 | 0 | 0 | 0 | 0 |
| 107 | 109 | 1 | 0 | 0 | 0 | 0 |
| 109 | 110 | 2 | 0 | 0 | 0 | 0 |
| 110 | 111 | 1 | 0 | 0 | 0 | 0 |
| 112 | 113 | 1 | 0 | 0 | 0 | 0 |
| 112 | 114 | 1 | 0 | 0 | 0 | 0 |
| 112 | 115 | 1 | 0 | 0 | 0 | 0 |
| 115 | 116 | 1 | 0 | 0 | 0 | 0 |
| 115 | 117 | 1 | 0 | 0 | 0 | 0 |
| 115 | 118 | 1 | 0 | 0 | 0 | 0 |
| 118 | 134 | 1 | 0 | 0 | 0 | 0 |
| 119 | 120 | 1 | 0 | 0 | 0 | 0 |
| 119 | 121 | 1 | 0 | 0 | 0 | 0 |
| 119 | 122 | 1 | 0 | 0 | 0 | 0 |
| 119 | 131 | 1 | 0 | 0 | 0 | 0 |
| 122 | 123 | 1 | 0 | 0 | 0 | 0 |
| 123 | 124 | 1 | 0 | 0 | 0 | 0 |
| 123 | 130 | 2 | 0 | 0 | 0 | 0 |
| 124 | 125 | 1 | 0 | 0 | 0 | 0 |
| 124 | 126 | 1 | 0 | 0 | 0 | 0 |
| 124 | 127 | 1 | 0 | 0 | 0 | 0 |
| 127 | 128 | 1 | 0 | 0 | 0 | 0 |
| 127 | 129 | 1 | 0 | 0 | 0 | 0 |
| 127 | 169 | 1 | 0 | 0 | 0 | 0 |
| 131 | 132 | 1 | 0 | 0 | 0 | 0 |
| 131 | 133 | 1 | 0 | 0 | 0 | 0 |
| 131 | 152 | 1 | 0 | 0 | 0 | 0 |
| 134 | 135 | 1 | 0 | 0 | 0 | 0 |
| 134 | 136 | 1 | 0 | 0 | 0 | 0 |
| 134 | 137 | 1 | 0 | 0 | 0 | 0 |

|        |   |   |   |   |   |
|--------|---|---|---|---|---|
| 137138 | 1 | 0 | 0 | 0 | 0 |
| 137139 | 1 | 0 | 0 | 0 | 0 |
| 137140 | 1 | 0 | 0 | 0 | 0 |
| 140141 | 1 | 0 | 0 | 0 | 0 |
| 140148 | 2 | 0 | 0 | 0 | 0 |
| 141142 | 1 | 0 | 0 | 0 | 0 |
| 142143 | 1 | 0 | 0 | 0 | 0 |
| 142144 | 1 | 0 | 0 | 0 | 0 |
| 142145 | 1 | 0 | 0 | 0 | 0 |
| 145146 | 1 | 0 | 0 | 0 | 0 |
| 145147 | 1 | 0 | 0 | 0 | 0 |
| 145149 | 1 | 0 | 0 | 0 | 0 |
| 149150 | 1 | 0 | 0 | 0 | 0 |
| 149151 | 1 | 0 | 0 | 0 | 0 |
| 149152 | 1 | 0 | 0 | 0 | 0 |
| 152153 | 1 | 0 | 0 | 0 | 0 |
| 152154 | 1 | 0 | 0 | 0 | 0 |
| 155156 | 1 | 0 | 0 | 0 | 0 |
| 155161 | 1 | 0 | 0 | 0 | 0 |
| 155163 | 1 | 0 | 0 | 0 | 0 |
| 156157 | 1 | 0 | 0 | 0 | 0 |
| 156158 | 2 | 0 | 0 | 0 | 0 |
| 158159 | 1 | 0 | 0 | 0 | 0 |
| 158160 | 1 | 0 | 0 | 0 | 0 |
| 160161 | 2 | 0 | 0 | 0 | 0 |
| 161162 | 1 | 0 | 0 | 0 | 0 |
| 163164 | 1 | 0 | 0 | 0 | 0 |
| 163165 | 1 | 0 | 0 | 0 | 0 |
| 163166 | 1 | 0 | 0 | 0 | 0 |
| 166167 | 1 | 0 | 0 | 0 | 0 |
| 166168 | 1 | 0 | 0 | 0 | 0 |
| 166169 | 1 | 0 | 0 | 0 | 0 |
| 169185 | 1 | 0 | 0 | 0 | 0 |
| 170171 | 1 | 0 | 0 | 0 | 0 |
| 170172 | 1 | 0 | 0 | 0 | 0 |
| 170173 | 1 | 0 | 0 | 0 | 0 |
| 170182 | 1 | 0 | 0 | 0 | 0 |
| 173174 | 1 | 0 | 0 | 0 | 0 |
| 174175 | 1 | 0 | 0 | 0 | 0 |
| 174181 | 2 | 0 | 0 | 0 | 0 |
| 175176 | 1 | 0 | 0 | 0 | 0 |
| 175177 | 1 | 0 | 0 | 0 | 0 |
| 175178 | 1 | 0 | 0 | 0 | 0 |
| 178179 | 1 | 0 | 0 | 0 | 0 |
| 178180 | 1 | 0 | 0 | 0 | 0 |
| 178220 | 1 | 0 | 0 | 0 | 0 |
| 182183 | 1 | 0 | 0 | 0 | 0 |
| 182184 | 1 | 0 | 0 | 0 | 0 |
| 182203 | 1 | 0 | 0 | 0 | 0 |
| 185186 | 1 | 0 | 0 | 0 | 0 |
| 185187 | 1 | 0 | 0 | 0 | 0 |
| 185188 | 1 | 0 | 0 | 0 | 0 |
| 188189 | 1 | 0 | 0 | 0 | 0 |
| 188190 | 1 | 0 | 0 | 0 | 0 |
| 188191 | 1 | 0 | 0 | 0 | 0 |
| 191192 | 1 | 0 | 0 | 0 | 0 |
| 191199 | 2 | 0 | 0 | 0 | 0 |
| 192193 | 1 | 0 | 0 | 0 | 0 |
| 193194 | 1 | 0 | 0 | 0 | 0 |
| 193195 | 1 | 0 | 0 | 0 | 0 |
| 193196 | 1 | 0 | 0 | 0 | 0 |
| 196197 | 1 | 0 | 0 | 0 | 0 |
| 196198 | 1 | 0 | 0 | 0 | 0 |
| 196200 | 1 | 0 | 0 | 0 | 0 |
| 200201 | 1 | 0 | 0 | 0 | 0 |
| 200202 | 1 | 0 | 0 | 0 | 0 |
| 200203 | 1 | 0 | 0 | 0 | 0 |
| 203204 | 1 | 0 | 0 | 0 | 0 |
| 203205 | 1 | 0 | 0 | 0 | 0 |
| 206207 | 1 | 0 | 0 | 0 | 0 |
| 206212 | 1 | 0 | 0 | 0 | 0 |
| 206214 | 1 | 0 | 0 | 0 | 0 |
| 207208 | 1 | 0 | 0 | 0 | 0 |
| 207209 | 2 | 0 | 0 | 0 | 0 |
| 209210 | 1 | 0 | 0 | 0 | 0 |
| 209211 | 1 | 0 | 0 | 0 | 0 |
| 211212 | 2 | 0 | 0 | 0 | 0 |
| 212213 | 1 | 0 | 0 | 0 | 0 |
| 214215 | 1 | 0 | 0 | 0 | 0 |
| 214216 | 1 | 0 | 0 | 0 | 0 |
| 214217 | 1 | 0 | 0 | 0 | 0 |



```

217218 1 0 0 0 0
217219 1 0 0 0 0
217220 1 0 0 0 0
220236 1 0 0 0 0
221222 1 0 0 0 0
221223 1 0 0 0 0
221224 1 0 0 0 0
221233 1 0 0 0 0
224225 1 0 0 0 0
225226 1 0 0 0 0
225232 2 0 0 0 0
226227 1 0 0 0 0
226228 1 0 0 0 0
226229 1 0 0 0 0
229230 1 0 0 0 0
229231 1 0 0 0 0
229271 1 0 0 0 0
233234 1 0 0 0 0
233235 1 0 0 0 0
233254 1 0 0 0 0
236237 1 0 0 0 0
236238 1 0 0 0 0
236239 1 0 0 0 0
239240 1 0 0 0 0
239241 1 0 0 0 0
239242 1 0 0 0 0
242243 1 0 0 0 0
242250 2 0 0 0 0
243244 1 0 0 0 0
244245 1 0 0 0 0
244246 1 0 0 0 0
244247 1 0 0 0 0
247248 1 0 0 0 0
247249 1 0 0 0 0
247251 1 0 0 0 0
251252 1 0 0 0 0
251253 1 0 0 0 0
251254 1 0 0 0 0
254255 1 0 0 0 0
254256 1 0 0 0 0
257258 1 0 0 0 0
257263 1 0 0 0 0
257265 1 0 0 0 0
258259 1 0 0 0 0
258260 2 0 0 0 0
260261 1 0 0 0 0
260262 1 0 0 0 0
262263 2 0 0 0 0
263264 1 0 0 0 0
265266 1 0 0 0 0
265267 1 0 0 0 0
265268 1 0 0 0 0
268269 1 0 0 0 0
268270 1 0 0 0 0
268271 1 0 0 0 0
271272 1 0 0 0 0

```

```

M END
> <NAME>
E94_12

```

```

$$$$
F28_12
MOE2012 3D

```

```

257256 0 0 1 0 0 0 0 0999 V2000
 22.9830 9.9960 -8.6790 O 0 0 0 0 0 0 0 0 0 0 0 0 0 0 0
 22.0540 10.1260 -8.9380 H 0 0 0 0 0 0 0 0 0 0 0 0 0 0 0
 23.4890 8.9230 -9.4610 C 0 0 0 0 0 0 0 0 0 0 0 0 0 0 0
 22.8820 8.0330 -9.2660 H 0 0 0 0 0 0 0 0 0 0 0 0 0 0 0
 23.4010 9.1900 -10.5190 H 0 0 0 0 0 0 0 0 0 0 0 0 0 0 0
 24.9420 8.6840 -9.0790 C 0 0 0 0 0 0 0 0 0 0 0 0 0 0 0
 25.5140 9.6070 -9.2340 H 0 0 0 0 0 0 0 0 0 0 0 0 0 0 0
 25.0050 8.4700 -8.0040 H 0 0 0 0 0 0 0 0 0 0 0 0 0 0 0
 25.5550 7.5400 -9.8840 C 0 0 0 0 0 0 0 0 0 0 0 0 0 0 0
 24.9800 6.6220 -9.7100 H 0 0 0 0 0 0 0 0 0 0 0 0 0 0 0
 25.4750 7.7750 -10.9520 H 0 0 0 0 0 0 0 0 0 0 0 0 0 0 0
 27.0190 7.3170 -9.4960 C 0 0 0 0 0 0 0 0 0 0 0 0 0 0 0
 27.6080 8.2260 -9.6670 H 0 0 0 0 0 0 0 0 0 0 0 0 0 0 0
 27.0720 7.1190 -8.4190 H 0 0 0 0 0 0 0 0 0 0 0 0 0 0 0
 27.6310 6.1770 -10.1790 N 0 0 0 3 0 0 0 0 0 0 0 0 0 0 0
 27.0330 5.3560 -10.0800 H 0 0 0 0 0 0 0 0 0 0 0 0 0 0 0

```







|    |    |   |   |   |   |   |
|----|----|---|---|---|---|---|
| 3  | 4  | 1 | 0 | 0 | 0 | 0 |
| 3  | 5  | 1 | 0 | 0 | 0 | 0 |
| 3  | 6  | 1 | 0 | 0 | 0 | 0 |
| 6  | 7  | 1 | 0 | 0 | 0 | 0 |
| 6  | 8  | 1 | 0 | 0 | 0 | 0 |
| 6  | 9  | 1 | 0 | 0 | 0 | 0 |
| 9  | 10 | 1 | 0 | 0 | 0 | 0 |
| 9  | 11 | 1 | 0 | 0 | 0 | 0 |
| 9  | 12 | 1 | 0 | 0 | 0 | 0 |
| 12 | 13 | 1 | 0 | 0 | 0 | 0 |
| 12 | 14 | 1 | 0 | 0 | 0 | 0 |
| 12 | 15 | 1 | 0 | 0 | 0 | 0 |
| 15 | 16 | 1 | 0 | 0 | 0 | 0 |
| 15 | 17 | 1 | 0 | 0 | 0 | 0 |
| 17 | 18 | 1 | 0 | 0 | 0 | 0 |
| 17 | 19 | 1 | 0 | 0 | 0 | 0 |
| 17 | 20 | 1 | 0 | 0 | 0 | 0 |
| 20 | 21 | 1 | 0 | 0 | 0 | 0 |
| 20 | 22 | 1 | 0 | 0 | 0 | 0 |
| 20 | 23 | 1 | 0 | 0 | 0 | 0 |
| 23 | 24 | 1 | 0 | 0 | 0 | 0 |
| 23 | 40 | 2 | 0 | 0 | 0 | 0 |
| 24 | 25 | 1 | 0 | 0 | 0 | 0 |
| 25 | 26 | 1 | 0 | 0 | 0 | 0 |
| 25 | 27 | 1 | 0 | 0 | 0 | 0 |
| 25 | 28 | 1 | 0 | 0 | 0 | 0 |
| 28 | 29 | 1 | 0 | 0 | 0 | 0 |
| 28 | 42 | 1 | 0 | 0 | 0 | 0 |
| 28 | 46 | 1 | 0 | 0 | 0 | 0 |
| 29 | 30 | 1 | 0 | 0 | 0 | 0 |
| 29 | 31 | 1 | 0 | 0 | 0 | 0 |
| 29 | 32 | 1 | 0 | 0 | 0 | 0 |
| 32 | 33 | 1 | 0 | 0 | 0 | 0 |
| 33 | 34 | 1 | 0 | 0 | 0 | 0 |
| 33 | 41 | 2 | 0 | 0 | 0 | 0 |
| 34 | 35 | 1 | 0 | 0 | 0 | 0 |
| 34 | 36 | 1 | 0 | 0 | 0 | 0 |
| 34 | 37 | 1 | 0 | 0 | 0 | 0 |
| 37 | 38 | 1 | 0 | 0 | 0 | 0 |
| 37 | 39 | 1 | 0 | 0 | 0 | 0 |
| 37 | 64 | 1 | 0 | 0 | 0 | 0 |
| 42 | 43 | 1 | 0 | 0 | 0 | 0 |
| 42 | 44 | 1 | 0 | 0 | 0 | 0 |
| 42 | 45 | 1 | 0 | 0 | 0 | 0 |
| 46 | 47 | 1 | 0 | 0 | 0 | 0 |
| 46 | 48 | 1 | 0 | 0 | 0 | 0 |
| 46 | 49 | 1 | 0 | 0 | 0 | 0 |
| 50 | 51 | 1 | 0 | 0 | 0 | 0 |
| 50 | 52 | 1 | 0 | 0 | 0 | 0 |
| 52 | 53 | 1 | 0 | 0 | 0 | 0 |
| 52 | 54 | 1 | 0 | 0 | 0 | 0 |
| 52 | 55 | 1 | 0 | 0 | 0 | 0 |
| 55 | 56 | 1 | 0 | 0 | 0 | 0 |
| 55 | 57 | 1 | 0 | 0 | 0 | 0 |
| 55 | 58 | 1 | 0 | 0 | 0 | 0 |
| 58 | 59 | 1 | 0 | 0 | 0 | 0 |
| 58 | 60 | 1 | 0 | 0 | 0 | 0 |
| 58 | 61 | 1 | 0 | 0 | 0 | 0 |
| 61 | 62 | 1 | 0 | 0 | 0 | 0 |
| 61 | 63 | 1 | 0 | 0 | 0 | 0 |
| 61 | 64 | 1 | 0 | 0 | 0 | 0 |
| 64 | 65 | 1 | 0 | 0 | 0 | 0 |
| 65 | 66 | 1 | 0 | 0 | 0 | 0 |
| 65 | 67 | 1 | 0 | 0 | 0 | 0 |
| 65 | 68 | 1 | 0 | 0 | 0 | 0 |
| 68 | 69 | 1 | 0 | 0 | 0 | 0 |
| 68 | 70 | 1 | 0 | 0 | 0 | 0 |
| 68 | 71 | 1 | 0 | 0 | 0 | 0 |
| 71 | 72 | 1 | 0 | 0 | 0 | 0 |
| 71 | 88 | 2 | 0 | 0 | 0 | 0 |
| 72 | 73 | 1 | 0 | 0 | 0 | 0 |
| 73 | 74 | 1 | 0 | 0 | 0 | 0 |
| 73 | 75 | 1 | 0 | 0 | 0 | 0 |
| 73 | 76 | 1 | 0 | 0 | 0 | 0 |
| 76 | 77 | 1 | 0 | 0 | 0 | 0 |
| 76 | 90 | 1 | 0 | 0 | 0 | 0 |
| 76 | 94 | 1 | 0 | 0 | 0 | 0 |
| 77 | 78 | 1 | 0 | 0 | 0 | 0 |
| 77 | 79 | 1 | 0 | 0 | 0 | 0 |
| 77 | 80 | 1 | 0 | 0 | 0 | 0 |
| 80 | 81 | 1 | 0 | 0 | 0 | 0 |

|     |     |   |   |   |   |   |
|-----|-----|---|---|---|---|---|
| 81  | 82  | 1 | 0 | 0 | 0 | 0 |
| 81  | 89  | 2 | 0 | 0 | 0 | 0 |
| 82  | 83  | 1 | 0 | 0 | 0 | 0 |
| 82  | 84  | 1 | 0 | 0 | 0 | 0 |
| 82  | 85  | 1 | 0 | 0 | 0 | 0 |
| 85  | 86  | 1 | 0 | 0 | 0 | 0 |
| 85  | 87  | 1 | 0 | 0 | 0 | 0 |
| 85  | 112 | 1 | 0 | 0 | 0 | 0 |
| 90  | 91  | 1 | 0 | 0 | 0 | 0 |
| 90  | 92  | 1 | 0 | 0 | 0 | 0 |
| 90  | 93  | 1 | 0 | 0 | 0 | 0 |
| 94  | 95  | 1 | 0 | 0 | 0 | 0 |
| 94  | 96  | 1 | 0 | 0 | 0 | 0 |
| 94  | 97  | 1 | 0 | 0 | 0 | 0 |
| 98  | 99  | 1 | 0 | 0 | 0 | 0 |
| 98  | 100 | 1 | 0 | 0 | 0 | 0 |
| 100 | 101 | 1 | 0 | 0 | 0 | 0 |
| 100 | 102 | 1 | 0 | 0 | 0 | 0 |
| 100 | 103 | 1 | 0 | 0 | 0 | 0 |
| 103 | 104 | 1 | 0 | 0 | 0 | 0 |
| 103 | 105 | 1 | 0 | 0 | 0 | 0 |
| 103 | 106 | 1 | 0 | 0 | 0 | 0 |
| 106 | 107 | 1 | 0 | 0 | 0 | 0 |
| 106 | 108 | 1 | 0 | 0 | 0 | 0 |
| 106 | 109 | 1 | 0 | 0 | 0 | 0 |
| 109 | 110 | 1 | 0 | 0 | 0 | 0 |
| 109 | 111 | 1 | 0 | 0 | 0 | 0 |
| 109 | 112 | 1 | 0 | 0 | 0 | 0 |
| 112 | 113 | 1 | 0 | 0 | 0 | 0 |
| 113 | 114 | 1 | 0 | 0 | 0 | 0 |
| 113 | 115 | 1 | 0 | 0 | 0 | 0 |
| 113 | 116 | 1 | 0 | 0 | 0 | 0 |
| 116 | 117 | 1 | 0 | 0 | 0 | 0 |
| 116 | 118 | 1 | 0 | 0 | 0 | 0 |
| 116 | 119 | 1 | 0 | 0 | 0 | 0 |
| 119 | 120 | 1 | 0 | 0 | 0 | 0 |
| 119 | 136 | 2 | 0 | 0 | 0 | 0 |
| 120 | 121 | 1 | 0 | 0 | 0 | 0 |
| 121 | 122 | 1 | 0 | 0 | 0 | 0 |
| 121 | 123 | 1 | 0 | 0 | 0 | 0 |
| 121 | 124 | 1 | 0 | 0 | 0 | 0 |
| 124 | 125 | 1 | 0 | 0 | 0 | 0 |
| 124 | 138 | 1 | 0 | 0 | 0 | 0 |
| 124 | 142 | 1 | 0 | 0 | 0 | 0 |
| 125 | 126 | 1 | 0 | 0 | 0 | 0 |
| 125 | 127 | 1 | 0 | 0 | 0 | 0 |
| 125 | 128 | 1 | 0 | 0 | 0 | 0 |
| 128 | 129 | 1 | 0 | 0 | 0 | 0 |
| 129 | 130 | 1 | 0 | 0 | 0 | 0 |
| 129 | 137 | 2 | 0 | 0 | 0 | 0 |
| 130 | 131 | 1 | 0 | 0 | 0 | 0 |
| 130 | 132 | 1 | 0 | 0 | 0 | 0 |
| 130 | 133 | 1 | 0 | 0 | 0 | 0 |
| 133 | 134 | 1 | 0 | 0 | 0 | 0 |
| 133 | 135 | 1 | 0 | 0 | 0 | 0 |
| 133 | 160 | 1 | 0 | 0 | 0 | 0 |
| 138 | 139 | 1 | 0 | 0 | 0 | 0 |
| 138 | 140 | 1 | 0 | 0 | 0 | 0 |
| 138 | 141 | 1 | 0 | 0 | 0 | 0 |
| 142 | 143 | 1 | 0 | 0 | 0 | 0 |
| 142 | 144 | 1 | 0 | 0 | 0 | 0 |
| 142 | 145 | 1 | 0 | 0 | 0 | 0 |
| 146 | 147 | 1 | 0 | 0 | 0 | 0 |
| 146 | 148 | 1 | 0 | 0 | 0 | 0 |
| 148 | 149 | 1 | 0 | 0 | 0 | 0 |
| 148 | 150 | 1 | 0 | 0 | 0 | 0 |
| 148 | 151 | 1 | 0 | 0 | 0 | 0 |
| 151 | 152 | 1 | 0 | 0 | 0 | 0 |
| 151 | 153 | 1 | 0 | 0 | 0 | 0 |
| 151 | 154 | 1 | 0 | 0 | 0 | 0 |
| 154 | 155 | 1 | 0 | 0 | 0 | 0 |
| 154 | 156 | 1 | 0 | 0 | 0 | 0 |
| 154 | 157 | 1 | 0 | 0 | 0 | 0 |
| 157 | 158 | 1 | 0 | 0 | 0 | 0 |
| 157 | 159 | 1 | 0 | 0 | 0 | 0 |
| 157 | 160 | 1 | 0 | 0 | 0 | 0 |
| 160 | 161 | 1 | 0 | 0 | 0 | 0 |
| 161 | 162 | 1 | 0 | 0 | 0 | 0 |
| 161 | 163 | 1 | 0 | 0 | 0 | 0 |
| 161 | 164 | 1 | 0 | 0 | 0 | 0 |
| 164 | 165 | 1 | 0 | 0 | 0 | 0 |

|        |   |   |   |   |   |
|--------|---|---|---|---|---|
| 164166 | 1 | 0 | 0 | 0 | 0 |
| 164167 | 1 | 0 | 0 | 0 | 0 |
| 167168 | 1 | 0 | 0 | 0 | 0 |
| 167184 | 2 | 0 | 0 | 0 | 0 |
| 168169 | 1 | 0 | 0 | 0 | 0 |
| 169170 | 1 | 0 | 0 | 0 | 0 |
| 169171 | 1 | 0 | 0 | 0 | 0 |
| 169172 | 1 | 0 | 0 | 0 | 0 |
| 172173 | 1 | 0 | 0 | 0 | 0 |
| 172186 | 1 | 0 | 0 | 0 | 0 |
| 172190 | 1 | 0 | 0 | 0 | 0 |
| 173174 | 1 | 0 | 0 | 0 | 0 |
| 173175 | 1 | 0 | 0 | 0 | 0 |
| 173176 | 1 | 0 | 0 | 0 | 0 |
| 176177 | 1 | 0 | 0 | 0 | 0 |
| 177178 | 1 | 0 | 0 | 0 | 0 |
| 177185 | 2 | 0 | 0 | 0 | 0 |
| 178179 | 1 | 0 | 0 | 0 | 0 |
| 178180 | 1 | 0 | 0 | 0 | 0 |
| 178181 | 1 | 0 | 0 | 0 | 0 |
| 181182 | 1 | 0 | 0 | 0 | 0 |
| 181183 | 1 | 0 | 0 | 0 | 0 |
| 181208 | 1 | 0 | 0 | 0 | 0 |
| 186187 | 1 | 0 | 0 | 0 | 0 |
| 186188 | 1 | 0 | 0 | 0 | 0 |
| 186189 | 1 | 0 | 0 | 0 | 0 |
| 190191 | 1 | 0 | 0 | 0 | 0 |
| 190192 | 1 | 0 | 0 | 0 | 0 |
| 190193 | 1 | 0 | 0 | 0 | 0 |
| 194195 | 1 | 0 | 0 | 0 | 0 |
| 194196 | 1 | 0 | 0 | 0 | 0 |
| 196197 | 1 | 0 | 0 | 0 | 0 |
| 196198 | 1 | 0 | 0 | 0 | 0 |
| 196199 | 1 | 0 | 0 | 0 | 0 |
| 199200 | 1 | 0 | 0 | 0 | 0 |
| 199201 | 1 | 0 | 0 | 0 | 0 |
| 199202 | 1 | 0 | 0 | 0 | 0 |
| 202203 | 1 | 0 | 0 | 0 | 0 |
| 202204 | 1 | 0 | 0 | 0 | 0 |
| 202205 | 1 | 0 | 0 | 0 | 0 |
| 205206 | 1 | 0 | 0 | 0 | 0 |
| 205207 | 1 | 0 | 0 | 0 | 0 |
| 205208 | 1 | 0 | 0 | 0 | 0 |
| 208209 | 1 | 0 | 0 | 0 | 0 |
| 209210 | 1 | 0 | 0 | 0 | 0 |
| 209211 | 1 | 0 | 0 | 0 | 0 |
| 209212 | 1 | 0 | 0 | 0 | 0 |
| 212213 | 1 | 0 | 0 | 0 | 0 |
| 212214 | 1 | 0 | 0 | 0 | 0 |
| 212215 | 1 | 0 | 0 | 0 | 0 |
| 215216 | 1 | 0 | 0 | 0 | 0 |
| 215232 | 2 | 0 | 0 | 0 | 0 |
| 216217 | 1 | 0 | 0 | 0 | 0 |
| 217218 | 1 | 0 | 0 | 0 | 0 |
| 217219 | 1 | 0 | 0 | 0 | 0 |
| 217220 | 1 | 0 | 0 | 0 | 0 |
| 220221 | 1 | 0 | 0 | 0 | 0 |
| 220234 | 1 | 0 | 0 | 0 | 0 |
| 220238 | 1 | 0 | 0 | 0 | 0 |
| 221222 | 1 | 0 | 0 | 0 | 0 |
| 221223 | 1 | 0 | 0 | 0 | 0 |
| 221224 | 1 | 0 | 0 | 0 | 0 |
| 224225 | 1 | 0 | 0 | 0 | 0 |
| 225226 | 1 | 0 | 0 | 0 | 0 |
| 225233 | 2 | 0 | 0 | 0 | 0 |
| 226227 | 1 | 0 | 0 | 0 | 0 |
| 226228 | 1 | 0 | 0 | 0 | 0 |
| 226229 | 1 | 0 | 0 | 0 | 0 |
| 229230 | 1 | 0 | 0 | 0 | 0 |
| 229231 | 1 | 0 | 0 | 0 | 0 |
| 229256 | 1 | 0 | 0 | 0 | 0 |
| 234235 | 1 | 0 | 0 | 0 | 0 |
| 234236 | 1 | 0 | 0 | 0 | 0 |
| 234237 | 1 | 0 | 0 | 0 | 0 |
| 238239 | 1 | 0 | 0 | 0 | 0 |
| 238240 | 1 | 0 | 0 | 0 | 0 |
| 238241 | 1 | 0 | 0 | 0 | 0 |
| 242243 | 1 | 0 | 0 | 0 | 0 |
| 242244 | 1 | 0 | 0 | 0 | 0 |
| 244245 | 1 | 0 | 0 | 0 | 0 |
| 244246 | 1 | 0 | 0 | 0 | 0 |

244247 1 0 0 0 0  
247248 1 0 0 0 0  
247249 1 0 0 0 0  
247250 1 0 0 0 0  
250251 1 0 0 0 0  
250252 1 0 0 0 0  
250253 1 0 0 0 0  
253254 1 0 0 0 0  
253255 1 0 0 0 0  
253256 1 0 0 0 0  
256257 1 0 0 0 0

M END  
> <NAME>  
F28\_12

\$\$\$\$  
F32\_12  
MOE2012 3D

275274 0 0 1 0 0 0 0 0999 V2000  
25.7150 -22.7020 -0.1490 O 0 0 0 0 0 0 0 0 0 0 0 0 0 0 0  
25.5310 -23.5870 0.2100 H 0 0 0 0 0 0 0 0 0 0 0 0 0 0 0  
25.4730 -22.7580 -1.5480 C 0 0 0 0 0 0 0 0 0 0 0 0 0 0 0  
26.1270 -23.5210 -1.9830 H 0 0 0 0 0 0 0 0 0 0 0 0 0 0 0  
24.4300 -23.0490 -1.7100 H 0 0 0 0 0 0 0 0 0 0 0 0 0 0 0  
25.7570 -21.3900 -2.1540 C 0 0 0 0 0 0 0 0 0 0 0 0 0 0 0  
25.1200 -20.6390 -1.6700 H 0 0 0 0 0 0 0 0 0 0 0 0 0 0 0  
26.7900 -21.0990 -1.9250 H 0 0 0 0 0 0 0 0 0 0 0 0 0 0 0  
25.5290 -21.3840 -3.6650 C 0 0 0 0 0 0 0 0 0 0 0 0 0 0 0  
26.1720 -22.1380 -4.1350 H 0 0 0 0 0 0 0 0 0 0 0 0 0 0 0  
24.4910 -21.6650 -3.8810 H 0 0 0 0 0 0 0 0 0 0 0 0 0 0 0  
25.8240 -20.0100 -4.2720 C 0 0 0 0 0 0 0 0 0 0 0 0 0 0 0  
25.1720 -19.2580 -3.8100 H 0 0 0 0 0 0 0 0 0 0 0 0 0 0 0  
26.8590 -19.7250 -4.0420 H 0 0 0 0 0 0 0 0 0 0 0 0 0 0 0  
25.6150 -20.0190 -5.7880 C 0 0 0 0 0 0 0 0 0 0 0 0 0 0 0  
26.2680 -20.7770 -6.2380 H 0 0 0 0 0 0 0 0 0 0 0 0 0 0 0  
24.5770 -20.2890 -6.0140 H 0 0 0 0 0 0 0 0 0 0 0 0 0 0 0  
25.9290 -18.7010 -6.3410 N 0 0 0 3 0 0 0 0 0 0 0 0 0 0 0  
25.3020 -18.0010 -5.9290 H 0 0 0 0 0 0 0 0 0 0 0 0 0 0 0  
25.7460 -18.6820 -7.7960 C 0 0 0 0 0 0 0 0 0 0 0 0 0 0 0  
24.7110 -18.9420 -8.0520 H 0 0 0 0 0 0 0 0 0 0 0 0 0 0 0  
26.4050 -19.4300 -8.2530 H 0 0 0 0 0 0 0 0 0 0 0 0 0 0 0  
26.0980 -17.3150 -8.3850 C 0 0 0 0 0 0 0 0 0 0 0 0 0 0 0  
27.0800 -16.9770 -8.0370 H 0 0 0 0 0 0 0 0 0 0 0 0 0 0 0  
26.1320 -17.4140 -9.4760 H 0 0 0 0 0 0 0 0 0 0 0 0 0 0 0  
25.0730 -16.2580 -8.0470 C 0 0 0 0 0 0 0 0 0 0 0 0 0 0 0  
25.2170 -15.1960 -8.8910 O 0 0 0 0 0 0 0 0 0 0 0 0 0 0 0  
24.2990 -14.1140 -8.6660 C 0 0 0 0 0 0 0 0 0 0 0 0 0 0 0  
23.2730 -14.4980 -8.7330 H 0 0 0 0 0 0 0 0 0 0 0 0 0 0 0  
24.4620 -13.7190 -7.6550 H 0 0 0 0 0 0 0 0 0 0 0 0 0 0 0  
24.5130 -12.9970 -9.7130 C 0 0 0 0 0 0 0 0 0 0 0 0 0 0 0  
23.4950 -11.8680 -9.4290 C 0 0 0 0 0 0 0 0 0 0 0 0 0 0 0  
22.4720 -12.2580 -9.5040 H 0 0 0 0 0 0 0 0 0 0 0 0 0 0 0  
23.6480 -11.4730 -8.4160 H 0 0 0 0 0 0 0 0 0 0 0 0 0 0 0  
23.6530 -10.7980 -10.3740 O 0 0 0 0 0 0 0 0 0 0 0 0 0 0 0  
22.8200 -9.7380 -10.1780 C 0 0 0 0 0 0 0 0 0 0 0 0 0 0 0  
23.0860 -8.6770 -11.2150 C 0 0 0 0 0 0 0 0 0 0 0 0 0 0 0  
24.1190 -8.7790 -11.5630 H 0 0 0 0 0 0 0 0 0 0 0 0 0 0 0  
22.4180 -8.8600 -12.0630 H 0 0 0 0 0 0 0 0 0 0 0 0 0 0 0  
22.8630 -7.2890 -10.6090 C 0 0 0 0 0 0 0 0 0 0 0 0 0 0 0  
23.4040 -7.2130 -9.6560 H 0 0 0 0 0 0 0 0 0 0 0 0 0 0 0  
21.8060 -7.1820 -10.3300 H 0 0 0 0 0 0 0 0 0 0 0 0 0 0 0  
24.2550 -16.3340 -7.1400 O 0 0 0 0 0 0 0 0 0 0 0 0 0 0 0  
21.9650 -9.6660 -9.3060 O 0 0 0 0 0 0 0 0 0 0 0 0 0 0 0  
25.9500 -12.4500 -9.6160 C 0 0 0 0 0 0 0 0 0 0 0 0 0 0 0  
26.1270 -11.6510 -10.3460 H 0 0 0 0 0 0 0 0 0 0 0 0 0 0 0  
26.6920 -13.2330 -9.8060 H 0 0 0 0 0 0 0 0 0 0 0 0 0 0 0  
26.1470 -12.0390 -8.6190 H 0 0 0 0 0 0 0 0 0 0 0 0 0 0 0  
24.3000 -13.5550 -11.1330 C 0 0 0 0 0 0 0 0 0 0 0 0 0 0 0  
25.0070 -14.3610 -11.3590 H 0 0 0 0 0 0 0 0 0 0 0 0 0 0 0  
24.4390 -12.7790 -11.8950 H 0 0 0 0 0 0 0 0 0 0 0 0 0 0 0  
23.2880 -13.9570 -11.2480 H 0 0 0 0 0 0 0 0 0 0 0 0 0 0 0  
20.8980 -1.8680 -17.0260 O 0 0 0 0 0 0 0 0 0 0 0 0 0 0 0  
20.2960 -1.8210 -17.7880 H 0 0 0 0 0 0 0 0 0 0 0 0 0 0 0  
20.7600 -3.1620 -16.4600 C 0 0 0 0 0 0 0 0 0 0 0 0 0 0 0  
19.7150 -3.3050 -16.1660 H 0 0 0 0 0 0 0 0 0 0 0 0 0 0 0  
21.0220 -3.9050 -17.2190 H 0 0 0 0 0 0 0 0 0 0 0 0 0 0 0  
21.6820 -3.2660 -15.2560 C 0 0 0 0 0 0 0 0 0 0 0 0 0 0 0  
22.7140 -3.0630 -15.5700 H 0 0 0 0 0 0 0 0 0 0 0 0 0 0 0  
21.4290 -2.4770 -14.5360 H 0 0 0 0 0 0 0 0 0 0 0 0 0 0 0  
21.5940 -4.6370 -14.5900 C 0 0 0 0 0 0 0 0 0 0 0 0 0 0 0









|     |     |   |   |   |   |   |
|-----|-----|---|---|---|---|---|
| 28  | 30  | 1 | 0 | 0 | 0 | 0 |
| 28  | 31  | 1 | 0 | 0 | 0 | 0 |
| 31  | 32  | 1 | 0 | 0 | 0 | 0 |
| 31  | 45  | 1 | 0 | 0 | 0 | 0 |
| 31  | 49  | 1 | 0 | 0 | 0 | 0 |
| 32  | 33  | 1 | 0 | 0 | 0 | 0 |
| 32  | 34  | 1 | 0 | 0 | 0 | 0 |
| 32  | 35  | 1 | 0 | 0 | 0 | 0 |
| 35  | 36  | 1 | 0 | 0 | 0 | 0 |
| 36  | 37  | 1 | 0 | 0 | 0 | 0 |
| 36  | 44  | 2 | 0 | 0 | 0 | 0 |
| 37  | 38  | 1 | 0 | 0 | 0 | 0 |
| 37  | 39  | 1 | 0 | 0 | 0 | 0 |
| 37  | 40  | 1 | 0 | 0 | 0 | 0 |
| 40  | 41  | 1 | 0 | 0 | 0 | 0 |
| 40  | 42  | 1 | 0 | 0 | 0 | 0 |
| 40  | 70  | 1 | 0 | 0 | 0 | 0 |
| 45  | 46  | 1 | 0 | 0 | 0 | 0 |
| 45  | 47  | 1 | 0 | 0 | 0 | 0 |
| 45  | 48  | 1 | 0 | 0 | 0 | 0 |
| 49  | 50  | 1 | 0 | 0 | 0 | 0 |
| 49  | 51  | 1 | 0 | 0 | 0 | 0 |
| 49  | 52  | 1 | 0 | 0 | 0 | 0 |
| 53  | 54  | 1 | 0 | 0 | 0 | 0 |
| 53  | 55  | 1 | 0 | 0 | 0 | 0 |
| 55  | 56  | 1 | 0 | 0 | 0 | 0 |
| 55  | 57  | 1 | 0 | 0 | 0 | 0 |
| 55  | 58  | 1 | 0 | 0 | 0 | 0 |
| 58  | 59  | 1 | 0 | 0 | 0 | 0 |
| 58  | 60  | 1 | 0 | 0 | 0 | 0 |
| 58  | 61  | 1 | 0 | 0 | 0 | 0 |
| 61  | 62  | 1 | 0 | 0 | 0 | 0 |
| 61  | 63  | 1 | 0 | 0 | 0 | 0 |
| 61  | 64  | 1 | 0 | 0 | 0 | 0 |
| 64  | 65  | 1 | 0 | 0 | 0 | 0 |
| 64  | 66  | 1 | 0 | 0 | 0 | 0 |
| 64  | 67  | 1 | 0 | 0 | 0 | 0 |
| 67  | 68  | 1 | 0 | 0 | 0 | 0 |
| 67  | 69  | 1 | 0 | 0 | 0 | 0 |
| 67  | 70  | 1 | 0 | 0 | 0 | 0 |
| 70  | 71  | 1 | 0 | 0 | 0 | 0 |
| 71  | 72  | 1 | 0 | 0 | 0 | 0 |
| 71  | 73  | 1 | 0 | 0 | 0 | 0 |
| 71  | 74  | 1 | 0 | 0 | 0 | 0 |
| 74  | 75  | 1 | 0 | 0 | 0 | 0 |
| 74  | 76  | 1 | 0 | 0 | 0 | 0 |
| 74  | 77  | 1 | 0 | 0 | 0 | 0 |
| 77  | 78  | 1 | 0 | 0 | 0 | 0 |
| 77  | 94  | 2 | 0 | 0 | 0 | 0 |
| 78  | 79  | 1 | 0 | 0 | 0 | 0 |
| 79  | 80  | 1 | 0 | 0 | 0 | 0 |
| 79  | 81  | 1 | 0 | 0 | 0 | 0 |
| 79  | 82  | 1 | 0 | 0 | 0 | 0 |
| 82  | 83  | 1 | 0 | 0 | 0 | 0 |
| 82  | 96  | 1 | 0 | 0 | 0 | 0 |
| 82  | 100 | 1 | 0 | 0 | 0 | 0 |
| 83  | 84  | 1 | 0 | 0 | 0 | 0 |
| 83  | 85  | 1 | 0 | 0 | 0 | 0 |
| 83  | 86  | 1 | 0 | 0 | 0 | 0 |
| 86  | 87  | 1 | 0 | 0 | 0 | 0 |
| 87  | 88  | 1 | 0 | 0 | 0 | 0 |
| 87  | 95  | 2 | 0 | 0 | 0 | 0 |
| 88  | 89  | 1 | 0 | 0 | 0 | 0 |
| 88  | 90  | 1 | 0 | 0 | 0 | 0 |
| 88  | 91  | 1 | 0 | 0 | 0 | 0 |
| 91  | 92  | 1 | 0 | 0 | 0 | 0 |
| 91  | 93  | 1 | 0 | 0 | 0 | 0 |
| 91  | 121 | 1 | 0 | 0 | 0 | 0 |
| 96  | 97  | 1 | 0 | 0 | 0 | 0 |
| 96  | 98  | 1 | 0 | 0 | 0 | 0 |
| 96  | 99  | 1 | 0 | 0 | 0 | 0 |
| 100 | 101 | 1 | 0 | 0 | 0 | 0 |
| 100 | 102 | 1 | 0 | 0 | 0 | 0 |
| 100 | 103 | 1 | 0 | 0 | 0 | 0 |
| 104 | 105 | 1 | 0 | 0 | 0 | 0 |
| 104 | 106 | 1 | 0 | 0 | 0 | 0 |
| 106 | 107 | 1 | 0 | 0 | 0 | 0 |
| 106 | 108 | 1 | 0 | 0 | 0 | 0 |
| 106 | 109 | 1 | 0 | 0 | 0 | 0 |
| 109 | 110 | 1 | 0 | 0 | 0 | 0 |
| 109 | 111 | 1 | 0 | 0 | 0 | 0 |

|        |   |   |   |   |   |
|--------|---|---|---|---|---|
| 109112 | 1 | 0 | 0 | 0 | 0 |
| 112113 | 1 | 0 | 0 | 0 | 0 |
| 112114 | 1 | 0 | 0 | 0 | 0 |
| 112115 | 1 | 0 | 0 | 0 | 0 |
| 115116 | 1 | 0 | 0 | 0 | 0 |
| 115117 | 1 | 0 | 0 | 0 | 0 |
| 115118 | 1 | 0 | 0 | 0 | 0 |
| 118119 | 1 | 0 | 0 | 0 | 0 |
| 118120 | 1 | 0 | 0 | 0 | 0 |
| 118121 | 1 | 0 | 0 | 0 | 0 |
| 121122 | 1 | 0 | 0 | 0 | 0 |
| 122123 | 1 | 0 | 0 | 0 | 0 |
| 122124 | 1 | 0 | 0 | 0 | 0 |
| 122125 | 1 | 0 | 0 | 0 | 0 |
| 125126 | 1 | 0 | 0 | 0 | 0 |
| 125127 | 1 | 0 | 0 | 0 | 0 |
| 125128 | 1 | 0 | 0 | 0 | 0 |
| 128129 | 1 | 0 | 0 | 0 | 0 |
| 128145 | 2 | 0 | 0 | 0 | 0 |
| 129130 | 1 | 0 | 0 | 0 | 0 |
| 130131 | 1 | 0 | 0 | 0 | 0 |
| 130132 | 1 | 0 | 0 | 0 | 0 |
| 130133 | 1 | 0 | 0 | 0 | 0 |
| 133134 | 1 | 0 | 0 | 0 | 0 |
| 133147 | 1 | 0 | 0 | 0 | 0 |
| 133151 | 1 | 0 | 0 | 0 | 0 |
| 134135 | 1 | 0 | 0 | 0 | 0 |
| 134136 | 1 | 0 | 0 | 0 | 0 |
| 134137 | 1 | 0 | 0 | 0 | 0 |
| 137138 | 1 | 0 | 0 | 0 | 0 |
| 138139 | 1 | 0 | 0 | 0 | 0 |
| 138146 | 2 | 0 | 0 | 0 | 0 |
| 139140 | 1 | 0 | 0 | 0 | 0 |
| 139141 | 1 | 0 | 0 | 0 | 0 |
| 139142 | 1 | 0 | 0 | 0 | 0 |
| 142143 | 1 | 0 | 0 | 0 | 0 |
| 142144 | 1 | 0 | 0 | 0 | 0 |
| 142172 | 1 | 0 | 0 | 0 | 0 |
| 147148 | 1 | 0 | 0 | 0 | 0 |
| 147149 | 1 | 0 | 0 | 0 | 0 |
| 147150 | 1 | 0 | 0 | 0 | 0 |
| 151152 | 1 | 0 | 0 | 0 | 0 |
| 151153 | 1 | 0 | 0 | 0 | 0 |
| 151154 | 1 | 0 | 0 | 0 | 0 |
| 155156 | 1 | 0 | 0 | 0 | 0 |
| 155157 | 1 | 0 | 0 | 0 | 0 |
| 157158 | 1 | 0 | 0 | 0 | 0 |
| 157159 | 1 | 0 | 0 | 0 | 0 |
| 157160 | 1 | 0 | 0 | 0 | 0 |
| 160161 | 1 | 0 | 0 | 0 | 0 |
| 160162 | 1 | 0 | 0 | 0 | 0 |
| 160163 | 1 | 0 | 0 | 0 | 0 |
| 163164 | 1 | 0 | 0 | 0 | 0 |
| 163165 | 1 | 0 | 0 | 0 | 0 |
| 163166 | 1 | 0 | 0 | 0 | 0 |
| 166167 | 1 | 0 | 0 | 0 | 0 |
| 166168 | 1 | 0 | 0 | 0 | 0 |
| 166169 | 1 | 0 | 0 | 0 | 0 |
| 169170 | 1 | 0 | 0 | 0 | 0 |
| 169171 | 1 | 0 | 0 | 0 | 0 |
| 169172 | 1 | 0 | 0 | 0 | 0 |
| 172173 | 1 | 0 | 0 | 0 | 0 |
| 173174 | 1 | 0 | 0 | 0 | 0 |
| 173175 | 1 | 0 | 0 | 0 | 0 |
| 173176 | 1 | 0 | 0 | 0 | 0 |
| 176177 | 1 | 0 | 0 | 0 | 0 |
| 176178 | 1 | 0 | 0 | 0 | 0 |
| 176179 | 1 | 0 | 0 | 0 | 0 |
| 179180 | 1 | 0 | 0 | 0 | 0 |
| 179196 | 2 | 0 | 0 | 0 | 0 |
| 180181 | 1 | 0 | 0 | 0 | 0 |
| 181182 | 1 | 0 | 0 | 0 | 0 |
| 181183 | 1 | 0 | 0 | 0 | 0 |
| 181184 | 1 | 0 | 0 | 0 | 0 |
| 184185 | 1 | 0 | 0 | 0 | 0 |
| 184198 | 1 | 0 | 0 | 0 | 0 |
| 184202 | 1 | 0 | 0 | 0 | 0 |
| 185186 | 1 | 0 | 0 | 0 | 0 |
| 185187 | 1 | 0 | 0 | 0 | 0 |
| 185188 | 1 | 0 | 0 | 0 | 0 |
| 188189 | 1 | 0 | 0 | 0 | 0 |

|        |   |   |   |   |   |
|--------|---|---|---|---|---|
| 189190 | 1 | 0 | 0 | 0 | 0 |
| 189197 | 2 | 0 | 0 | 0 | 0 |
| 190191 | 1 | 0 | 0 | 0 | 0 |
| 190192 | 1 | 0 | 0 | 0 | 0 |
| 190193 | 1 | 0 | 0 | 0 | 0 |
| 193194 | 1 | 0 | 0 | 0 | 0 |
| 193195 | 1 | 0 | 0 | 0 | 0 |
| 193223 | 1 | 0 | 0 | 0 | 0 |
| 198199 | 1 | 0 | 0 | 0 | 0 |
| 198200 | 1 | 0 | 0 | 0 | 0 |
| 198201 | 1 | 0 | 0 | 0 | 0 |
| 202203 | 1 | 0 | 0 | 0 | 0 |
| 202204 | 1 | 0 | 0 | 0 | 0 |
| 202205 | 1 | 0 | 0 | 0 | 0 |
| 206207 | 1 | 0 | 0 | 0 | 0 |
| 206208 | 1 | 0 | 0 | 0 | 0 |
| 208209 | 1 | 0 | 0 | 0 | 0 |
| 208210 | 1 | 0 | 0 | 0 | 0 |
| 208211 | 1 | 0 | 0 | 0 | 0 |
| 211212 | 1 | 0 | 0 | 0 | 0 |
| 211213 | 1 | 0 | 0 | 0 | 0 |
| 211214 | 1 | 0 | 0 | 0 | 0 |
| 214215 | 1 | 0 | 0 | 0 | 0 |
| 214216 | 1 | 0 | 0 | 0 | 0 |
| 214217 | 1 | 0 | 0 | 0 | 0 |
| 217218 | 1 | 0 | 0 | 0 | 0 |
| 217219 | 1 | 0 | 0 | 0 | 0 |
| 217220 | 1 | 0 | 0 | 0 | 0 |
| 220221 | 1 | 0 | 0 | 0 | 0 |
| 220222 | 1 | 0 | 0 | 0 | 0 |
| 220223 | 1 | 0 | 0 | 0 | 0 |
| 223224 | 1 | 0 | 0 | 0 | 0 |
| 224225 | 1 | 0 | 0 | 0 | 0 |
| 224226 | 1 | 0 | 0 | 0 | 0 |
| 224227 | 1 | 0 | 0 | 0 | 0 |
| 227228 | 1 | 0 | 0 | 0 | 0 |
| 227229 | 1 | 0 | 0 | 0 | 0 |
| 227230 | 1 | 0 | 0 | 0 | 0 |
| 230231 | 1 | 0 | 0 | 0 | 0 |
| 230247 | 2 | 0 | 0 | 0 | 0 |
| 231232 | 1 | 0 | 0 | 0 | 0 |
| 232233 | 1 | 0 | 0 | 0 | 0 |
| 232234 | 1 | 0 | 0 | 0 | 0 |
| 232235 | 1 | 0 | 0 | 0 | 0 |
| 235236 | 1 | 0 | 0 | 0 | 0 |
| 235249 | 1 | 0 | 0 | 0 | 0 |
| 235253 | 1 | 0 | 0 | 0 | 0 |
| 236237 | 1 | 0 | 0 | 0 | 0 |
| 236238 | 1 | 0 | 0 | 0 | 0 |
| 236239 | 1 | 0 | 0 | 0 | 0 |
| 239240 | 1 | 0 | 0 | 0 | 0 |
| 240241 | 1 | 0 | 0 | 0 | 0 |
| 240248 | 2 | 0 | 0 | 0 | 0 |
| 241242 | 1 | 0 | 0 | 0 | 0 |
| 241243 | 1 | 0 | 0 | 0 | 0 |
| 241244 | 1 | 0 | 0 | 0 | 0 |
| 244245 | 1 | 0 | 0 | 0 | 0 |
| 244246 | 1 | 0 | 0 | 0 | 0 |
| 244274 | 1 | 0 | 0 | 0 | 0 |
| 249250 | 1 | 0 | 0 | 0 | 0 |
| 249251 | 1 | 0 | 0 | 0 | 0 |
| 249252 | 1 | 0 | 0 | 0 | 0 |
| 253254 | 1 | 0 | 0 | 0 | 0 |
| 253255 | 1 | 0 | 0 | 0 | 0 |
| 253256 | 1 | 0 | 0 | 0 | 0 |
| 257258 | 1 | 0 | 0 | 0 | 0 |
| 257259 | 1 | 0 | 0 | 0 | 0 |
| 259260 | 1 | 0 | 0 | 0 | 0 |
| 259261 | 1 | 0 | 0 | 0 | 0 |
| 259262 | 1 | 0 | 0 | 0 | 0 |
| 262263 | 1 | 0 | 0 | 0 | 0 |
| 262264 | 1 | 0 | 0 | 0 | 0 |
| 262265 | 1 | 0 | 0 | 0 | 0 |
| 265266 | 1 | 0 | 0 | 0 | 0 |
| 265267 | 1 | 0 | 0 | 0 | 0 |
| 265268 | 1 | 0 | 0 | 0 | 0 |
| 268269 | 1 | 0 | 0 | 0 | 0 |
| 268270 | 1 | 0 | 0 | 0 | 0 |
| 268271 | 1 | 0 | 0 | 0 | 0 |
| 271272 | 1 | 0 | 0 | 0 | 0 |
| 271273 | 1 | 0 | 0 | 0 | 0 |











|    |    |   |   |   |   |   |
|----|----|---|---|---|---|---|
| 1  | 4  | 1 | 0 | 0 | 0 | 0 |
| 1  | 16 | 1 | 0 | 0 | 0 | 0 |
| 4  | 5  | 1 | 0 | 0 | 0 | 0 |
| 4  | 13 | 1 | 0 | 0 | 0 | 0 |
| 5  | 6  | 1 | 0 | 0 | 0 | 0 |
| 5  | 7  | 1 | 0 | 0 | 0 | 0 |
| 5  | 8  | 1 | 0 | 0 | 0 | 0 |
| 8  | 9  | 1 | 0 | 0 | 0 | 0 |
| 8  | 10 | 1 | 0 | 0 | 0 | 0 |
| 8  | 11 | 1 | 0 | 0 | 0 | 0 |
| 11 | 12 | 1 | 0 | 0 | 0 | 0 |
| 11 | 26 | 1 | 0 | 0 | 0 | 0 |
| 13 | 14 | 1 | 0 | 0 | 0 | 0 |
| 13 | 15 | 1 | 0 | 0 | 0 | 0 |
| 13 | 21 | 1 | 0 | 0 | 0 | 0 |
| 16 | 17 | 1 | 0 | 0 | 0 | 0 |
| 16 | 18 | 1 | 0 | 0 | 0 | 0 |
| 16 | 19 | 1 | 0 | 0 | 0 | 0 |
| 19 | 20 | 1 | 0 | 0 | 0 | 0 |
| 21 | 22 | 1 | 0 | 0 | 0 | 0 |
| 21 | 23 | 1 | 0 | 0 | 0 | 0 |
| 21 | 24 | 1 | 0 | 0 | 0 | 0 |
| 24 | 25 | 1 | 0 | 0 | 0 | 0 |
| 26 | 27 | 1 | 0 | 0 | 0 | 0 |
| 26 | 28 | 1 | 0 | 0 | 0 | 0 |
| 26 | 29 | 1 | 0 | 0 | 0 | 0 |
| 29 | 30 | 1 | 0 | 0 | 0 | 0 |
| 29 | 31 | 1 | 0 | 0 | 0 | 0 |
| 29 | 32 | 1 | 0 | 0 | 0 | 0 |
| 32 | 33 | 1 | 0 | 0 | 0 | 0 |
| 32 | 49 | 2 | 0 | 0 | 0 | 0 |
| 33 | 34 | 1 | 0 | 0 | 0 | 0 |
| 34 | 35 | 1 | 0 | 0 | 0 | 0 |
| 34 | 36 | 1 | 0 | 0 | 0 | 0 |
| 34 | 37 | 1 | 0 | 0 | 0 | 0 |
| 37 | 38 | 1 | 0 | 0 | 0 | 0 |
| 37 | 51 | 1 | 0 | 0 | 0 | 0 |
| 37 | 55 | 1 | 0 | 0 | 0 | 0 |
| 38 | 39 | 1 | 0 | 0 | 0 | 0 |
| 38 | 40 | 1 | 0 | 0 | 0 | 0 |
| 38 | 41 | 1 | 0 | 0 | 0 | 0 |
| 41 | 42 | 1 | 0 | 0 | 0 | 0 |
| 42 | 43 | 1 | 0 | 0 | 0 | 0 |
| 42 | 50 | 2 | 0 | 0 | 0 | 0 |
| 43 | 44 | 1 | 0 | 0 | 0 | 0 |
| 43 | 45 | 1 | 0 | 0 | 0 | 0 |
| 43 | 46 | 1 | 0 | 0 | 0 | 0 |
| 46 | 47 | 1 | 0 | 0 | 0 | 0 |
| 46 | 48 | 1 | 0 | 0 | 0 | 0 |
| 46 | 69 | 1 | 0 | 0 | 0 | 0 |
| 51 | 52 | 1 | 0 | 0 | 0 | 0 |
| 51 | 53 | 1 | 0 | 0 | 0 | 0 |
| 51 | 54 | 1 | 0 | 0 | 0 | 0 |
| 55 | 56 | 1 | 0 | 0 | 0 | 0 |
| 55 | 57 | 1 | 0 | 0 | 0 | 0 |
| 55 | 58 | 1 | 0 | 0 | 0 | 0 |
| 59 | 60 | 1 | 0 | 0 | 0 | 0 |
| 59 | 61 | 1 | 0 | 0 | 0 | 0 |
| 59 | 62 | 1 | 0 | 0 | 0 | 0 |
| 59 | 73 | 1 | 0 | 0 | 0 | 0 |
| 62 | 63 | 1 | 0 | 0 | 0 | 0 |
| 62 | 70 | 1 | 0 | 0 | 0 | 0 |
| 63 | 64 | 1 | 0 | 0 | 0 | 0 |
| 63 | 65 | 1 | 0 | 0 | 0 | 0 |
| 63 | 66 | 1 | 0 | 0 | 0 | 0 |
| 66 | 67 | 1 | 0 | 0 | 0 | 0 |
| 66 | 68 | 1 | 0 | 0 | 0 | 0 |
| 66 | 69 | 1 | 0 | 0 | 0 | 0 |
| 69 | 83 | 1 | 0 | 0 | 0 | 0 |
| 70 | 71 | 1 | 0 | 0 | 0 | 0 |
| 70 | 72 | 1 | 0 | 0 | 0 | 0 |
| 70 | 78 | 1 | 0 | 0 | 0 | 0 |
| 73 | 74 | 1 | 0 | 0 | 0 | 0 |
| 73 | 75 | 1 | 0 | 0 | 0 | 0 |
| 73 | 76 | 1 | 0 | 0 | 0 | 0 |
| 76 | 77 | 1 | 0 | 0 | 0 | 0 |
| 78 | 79 | 1 | 0 | 0 | 0 | 0 |
| 78 | 80 | 1 | 0 | 0 | 0 | 0 |
| 78 | 81 | 1 | 0 | 0 | 0 | 0 |
| 81 | 82 | 1 | 0 | 0 | 0 | 0 |
| 83 | 84 | 1 | 0 | 0 | 0 | 0 |

|     |     |   |   |   |   |   |
|-----|-----|---|---|---|---|---|
| 83  | 85  | 1 | 0 | 0 | 0 | 0 |
| 83  | 86  | 1 | 0 | 0 | 0 | 0 |
| 86  | 87  | 1 | 0 | 0 | 0 | 0 |
| 86  | 88  | 1 | 0 | 0 | 0 | 0 |
| 86  | 89  | 1 | 0 | 0 | 0 | 0 |
| 89  | 90  | 1 | 0 | 0 | 0 | 0 |
| 89  | 106 | 2 | 0 | 0 | 0 | 0 |
| 90  | 91  | 1 | 0 | 0 | 0 | 0 |
| 91  | 92  | 1 | 0 | 0 | 0 | 0 |
| 91  | 93  | 1 | 0 | 0 | 0 | 0 |
| 91  | 94  | 1 | 0 | 0 | 0 | 0 |
| 94  | 95  | 1 | 0 | 0 | 0 | 0 |
| 94  | 108 | 1 | 0 | 0 | 0 | 0 |
| 94  | 112 | 1 | 0 | 0 | 0 | 0 |
| 95  | 96  | 1 | 0 | 0 | 0 | 0 |
| 95  | 97  | 1 | 0 | 0 | 0 | 0 |
| 95  | 98  | 1 | 0 | 0 | 0 | 0 |
| 98  | 99  | 1 | 0 | 0 | 0 | 0 |
| 99  | 100 | 1 | 0 | 0 | 0 | 0 |
| 99  | 107 | 2 | 0 | 0 | 0 | 0 |
| 100 | 101 | 1 | 0 | 0 | 0 | 0 |
| 100 | 102 | 1 | 0 | 0 | 0 | 0 |
| 100 | 103 | 1 | 0 | 0 | 0 | 0 |
| 103 | 104 | 1 | 0 | 0 | 0 | 0 |
| 103 | 105 | 1 | 0 | 0 | 0 | 0 |
| 103 | 126 | 1 | 0 | 0 | 0 | 0 |
| 108 | 109 | 1 | 0 | 0 | 0 | 0 |
| 108 | 110 | 1 | 0 | 0 | 0 | 0 |
| 108 | 111 | 1 | 0 | 0 | 0 | 0 |
| 112 | 113 | 1 | 0 | 0 | 0 | 0 |
| 112 | 114 | 1 | 0 | 0 | 0 | 0 |
| 112 | 115 | 1 | 0 | 0 | 0 | 0 |
| 116 | 117 | 1 | 0 | 0 | 0 | 0 |
| 116 | 118 | 1 | 0 | 0 | 0 | 0 |
| 116 | 119 | 1 | 0 | 0 | 0 | 0 |
| 116 | 130 | 1 | 0 | 0 | 0 | 0 |
| 119 | 120 | 1 | 0 | 0 | 0 | 0 |
| 119 | 127 | 1 | 0 | 0 | 0 | 0 |
| 120 | 121 | 1 | 0 | 0 | 0 | 0 |
| 120 | 122 | 1 | 0 | 0 | 0 | 0 |
| 120 | 123 | 1 | 0 | 0 | 0 | 0 |
| 123 | 124 | 1 | 0 | 0 | 0 | 0 |
| 123 | 125 | 1 | 0 | 0 | 0 | 0 |
| 123 | 126 | 1 | 0 | 0 | 0 | 0 |
| 126 | 140 | 1 | 0 | 0 | 0 | 0 |
| 127 | 128 | 1 | 0 | 0 | 0 | 0 |
| 127 | 129 | 1 | 0 | 0 | 0 | 0 |
| 127 | 135 | 1 | 0 | 0 | 0 | 0 |
| 130 | 131 | 1 | 0 | 0 | 0 | 0 |
| 130 | 132 | 1 | 0 | 0 | 0 | 0 |
| 130 | 133 | 1 | 0 | 0 | 0 | 0 |
| 133 | 134 | 1 | 0 | 0 | 0 | 0 |
| 135 | 136 | 1 | 0 | 0 | 0 | 0 |
| 135 | 137 | 1 | 0 | 0 | 0 | 0 |
| 135 | 138 | 1 | 0 | 0 | 0 | 0 |
| 138 | 139 | 1 | 0 | 0 | 0 | 0 |
| 140 | 141 | 1 | 0 | 0 | 0 | 0 |
| 140 | 142 | 1 | 0 | 0 | 0 | 0 |
| 140 | 143 | 1 | 0 | 0 | 0 | 0 |
| 143 | 144 | 1 | 0 | 0 | 0 | 0 |
| 143 | 145 | 1 | 0 | 0 | 0 | 0 |
| 143 | 146 | 1 | 0 | 0 | 0 | 0 |
| 146 | 147 | 1 | 0 | 0 | 0 | 0 |
| 146 | 163 | 2 | 0 | 0 | 0 | 0 |
| 147 | 148 | 1 | 0 | 0 | 0 | 0 |
| 148 | 149 | 1 | 0 | 0 | 0 | 0 |
| 148 | 150 | 1 | 0 | 0 | 0 | 0 |
| 148 | 151 | 1 | 0 | 0 | 0 | 0 |
| 151 | 152 | 1 | 0 | 0 | 0 | 0 |
| 151 | 165 | 1 | 0 | 0 | 0 | 0 |
| 151 | 169 | 1 | 0 | 0 | 0 | 0 |
| 152 | 153 | 1 | 0 | 0 | 0 | 0 |
| 152 | 154 | 1 | 0 | 0 | 0 | 0 |
| 152 | 155 | 1 | 0 | 0 | 0 | 0 |
| 155 | 156 | 1 | 0 | 0 | 0 | 0 |
| 156 | 157 | 1 | 0 | 0 | 0 | 0 |
| 156 | 164 | 2 | 0 | 0 | 0 | 0 |
| 157 | 158 | 1 | 0 | 0 | 0 | 0 |
| 157 | 159 | 1 | 0 | 0 | 0 | 0 |
| 157 | 160 | 1 | 0 | 0 | 0 | 0 |
| 160 | 161 | 1 | 0 | 0 | 0 | 0 |

|        |   |   |   |   |   |
|--------|---|---|---|---|---|
| 160162 | 1 | 0 | 0 | 0 | 0 |
| 160183 | 1 | 0 | 0 | 0 | 0 |
| 165166 | 1 | 0 | 0 | 0 | 0 |
| 165167 | 1 | 0 | 0 | 0 | 0 |
| 165168 | 1 | 0 | 0 | 0 | 0 |
| 169170 | 1 | 0 | 0 | 0 | 0 |
| 169171 | 1 | 0 | 0 | 0 | 0 |
| 169172 | 1 | 0 | 0 | 0 | 0 |
| 173174 | 1 | 0 | 0 | 0 | 0 |
| 173175 | 1 | 0 | 0 | 0 | 0 |
| 173176 | 1 | 0 | 0 | 0 | 0 |
| 173187 | 1 | 0 | 0 | 0 | 0 |
| 176177 | 1 | 0 | 0 | 0 | 0 |
| 176184 | 1 | 0 | 0 | 0 | 0 |
| 177178 | 1 | 0 | 0 | 0 | 0 |
| 177179 | 1 | 0 | 0 | 0 | 0 |
| 177180 | 1 | 0 | 0 | 0 | 0 |
| 180181 | 1 | 0 | 0 | 0 | 0 |
| 180182 | 1 | 0 | 0 | 0 | 0 |
| 180183 | 1 | 0 | 0 | 0 | 0 |
| 183197 | 1 | 0 | 0 | 0 | 0 |
| 184185 | 1 | 0 | 0 | 0 | 0 |
| 184186 | 1 | 0 | 0 | 0 | 0 |
| 184192 | 1 | 0 | 0 | 0 | 0 |
| 187188 | 1 | 0 | 0 | 0 | 0 |
| 187189 | 1 | 0 | 0 | 0 | 0 |
| 187190 | 1 | 0 | 0 | 0 | 0 |
| 190191 | 1 | 0 | 0 | 0 | 0 |
| 192193 | 1 | 0 | 0 | 0 | 0 |
| 192194 | 1 | 0 | 0 | 0 | 0 |
| 192195 | 1 | 0 | 0 | 0 | 0 |
| 195196 | 1 | 0 | 0 | 0 | 0 |
| 197198 | 1 | 0 | 0 | 0 | 0 |
| 197199 | 1 | 0 | 0 | 0 | 0 |
| 197200 | 1 | 0 | 0 | 0 | 0 |
| 200201 | 1 | 0 | 0 | 0 | 0 |
| 200202 | 1 | 0 | 0 | 0 | 0 |
| 200203 | 1 | 0 | 0 | 0 | 0 |
| 203204 | 1 | 0 | 0 | 0 | 0 |
| 203220 | 2 | 0 | 0 | 0 | 0 |
| 204205 | 1 | 0 | 0 | 0 | 0 |
| 205206 | 1 | 0 | 0 | 0 | 0 |
| 205207 | 1 | 0 | 0 | 0 | 0 |
| 205208 | 1 | 0 | 0 | 0 | 0 |
| 208209 | 1 | 0 | 0 | 0 | 0 |
| 208222 | 1 | 0 | 0 | 0 | 0 |
| 208226 | 1 | 0 | 0 | 0 | 0 |
| 209210 | 1 | 0 | 0 | 0 | 0 |
| 209211 | 1 | 0 | 0 | 0 | 0 |
| 209212 | 1 | 0 | 0 | 0 | 0 |
| 212213 | 1 | 0 | 0 | 0 | 0 |
| 213214 | 1 | 0 | 0 | 0 | 0 |
| 213221 | 2 | 0 | 0 | 0 | 0 |
| 214215 | 1 | 0 | 0 | 0 | 0 |
| 214216 | 1 | 0 | 0 | 0 | 0 |
| 214217 | 1 | 0 | 0 | 0 | 0 |
| 217218 | 1 | 0 | 0 | 0 | 0 |
| 217219 | 1 | 0 | 0 | 0 | 0 |
| 217240 | 1 | 0 | 0 | 0 | 0 |
| 222223 | 1 | 0 | 0 | 0 | 0 |
| 222224 | 1 | 0 | 0 | 0 | 0 |
| 222225 | 1 | 0 | 0 | 0 | 0 |
| 226227 | 1 | 0 | 0 | 0 | 0 |
| 226228 | 1 | 0 | 0 | 0 | 0 |
| 226229 | 1 | 0 | 0 | 0 | 0 |
| 230231 | 1 | 0 | 0 | 0 | 0 |
| 230232 | 1 | 0 | 0 | 0 | 0 |
| 230233 | 1 | 0 | 0 | 0 | 0 |
| 230244 | 1 | 0 | 0 | 0 | 0 |
| 233234 | 1 | 0 | 0 | 0 | 0 |
| 233241 | 1 | 0 | 0 | 0 | 0 |
| 234235 | 1 | 0 | 0 | 0 | 0 |
| 234236 | 1 | 0 | 0 | 0 | 0 |
| 234237 | 1 | 0 | 0 | 0 | 0 |
| 237238 | 1 | 0 | 0 | 0 | 0 |
| 237239 | 1 | 0 | 0 | 0 | 0 |
| 237240 | 1 | 0 | 0 | 0 | 0 |
| 240254 | 1 | 0 | 0 | 0 | 0 |
| 241242 | 1 | 0 | 0 | 0 | 0 |
| 241243 | 1 | 0 | 0 | 0 | 0 |
| 241249 | 1 | 0 | 0 | 0 | 0 |

```

244245 1 0 0 0 0
244246 1 0 0 0 0
244247 1 0 0 0 0
247248 1 0 0 0 0
249250 1 0 0 0 0
249251 1 0 0 0 0
249252 1 0 0 0 0
252253 1 0 0 0 0
254255 1 0 0 0 0
254256 1 0 0 0 0
254257 1 0 0 0 0
257258 1 0 0 0 0
257259 1 0 0 0 0
257260 1 0 0 0 0
260261 1 0 0 0 0
260277 2 0 0 0 0
261262 1 0 0 0 0
262263 1 0 0 0 0
262264 1 0 0 0 0
262265 1 0 0 0 0
265266 1 0 0 0 0
265279 1 0 0 0 0
265283 1 0 0 0 0
266267 1 0 0 0 0
266268 1 0 0 0 0
266269 1 0 0 0 0
269270 1 0 0 0 0
270271 1 0 0 0 0
270278 2 0 0 0 0
271272 1 0 0 0 0
271273 1 0 0 0 0
271274 1 0 0 0 0
274275 1 0 0 0 0
274276 1 0 0 0 0
274297 1 0 0 0 0
279280 1 0 0 0 0
279281 1 0 0 0 0
279282 1 0 0 0 0
283284 1 0 0 0 0
283285 1 0 0 0 0
283286 1 0 0 0 0
287288 1 0 0 0 0
287289 1 0 0 0 0
287290 1 0 0 0 0
287302 1 0 0 0 0
290291 1 0 0 0 0
290299 1 0 0 0 0
291292 1 0 0 0 0
291293 1 0 0 0 0
291294 1 0 0 0 0
294295 1 0 0 0 0
294296 1 0 0 0 0
294297 1 0 0 0 0
297298 1 0 0 0 0
299300 1 0 0 0 0
299301 1 0 0 0 0
299307 1 0 0 0 0
302303 1 0 0 0 0
302304 1 0 0 0 0
302305 1 0 0 0 0
305306 1 0 0 0 0
307308 1 0 0 0 0
307309 1 0 0 0 0
307310 1 0 0 0 0
310311 1 0 0 0 0

```

```

M END
> <NAME>
F86_12

```

```

$$$$
F94_12
MOE2012 3D

```

```

257262 0 0 1 0 0 0 0 0999 V2000
18.1660 -10.4540 -18.6480 N 0 0 0 0 0 0 0 0 0 0 0 0 0 0 0 0
17.5750 -10.6140 -19.8690 C 0 0 0 0 0 0 0 0 0 0 0 0 0 0 0 0
17.6290 -11.5370 -20.4310 H 0 0 0 0 0 0 0 0 0 0 0 0 0 0 0 0
16.9780 -9.4030 -20.1300 C 0 0 0 0 0 0 0 0 0 0 0 0 0 0 0 0
16.4080 -9.1200 -21.0040 H 0 0 0 0 0 0 0 0 0 0 0 0 0 0 0 0
17.1890 -8.5200 -19.1010 N 0 0 0 0 0 0 0 0 0 0 0 0 0 0 0 0
17.9030 -9.1840 -18.2200 C 0 0 0 0 0 0 0 0 0 0 0 0 0 0 0 0

```

|         |          |          |   |   |   |   |   |   |   |   |   |   |   |   |   |   |
|---------|----------|----------|---|---|---|---|---|---|---|---|---|---|---|---|---|---|
| 18.2520 | -8.7960  | -17.2730 | H | 0 | 0 | 0 | 0 | 0 | 0 | 0 | 0 | 0 | 0 | 0 | 0 | 0 |
| 18.9350 | -11.4500 | -17.9290 | C | 0 | 0 | 0 | 0 | 0 | 0 | 0 | 0 | 0 | 0 | 0 | 0 | 0 |
| 18.7600 | -11.2880 | -16.8580 | H | 0 | 0 | 0 | 0 | 0 | 0 | 0 | 0 | 0 | 0 | 0 | 0 | 0 |
| 18.5260 | -12.4340 | -18.1870 | H | 0 | 0 | 0 | 0 | 0 | 0 | 0 | 0 | 0 | 0 | 0 | 0 | 0 |
| 20.4260 | -11.3670 | -18.2640 | C | 0 | 0 | 0 | 0 | 0 | 0 | 0 | 0 | 0 | 0 | 0 | 0 | 0 |
| 20.5660 | -11.5400 | -19.3380 | H | 0 | 0 | 0 | 0 | 0 | 0 | 0 | 0 | 0 | 0 | 0 | 0 | 0 |
| 20.7990 | -10.3600 | -18.0410 | H | 0 | 0 | 0 | 0 | 0 | 0 | 0 | 0 | 0 | 0 | 0 | 0 | 0 |
| 21.1760 | -12.3640 | -17.4950 | N | 0 | 0 | 3 | 0 | 0 | 0 | 0 | 0 | 0 | 0 | 0 | 0 | 0 |
| 21.0750 | -12.1700 | -16.4900 | H | 0 | 0 | 0 | 0 | 0 | 0 | 0 | 0 | 0 | 0 | 0 | 0 | 0 |
| 22.6070 | -12.3110 | -17.8160 | C | 0 | 0 | 0 | 0 | 0 | 0 | 0 | 0 | 0 | 0 | 0 | 0 | 0 |
| 22.9990 | -11.3020 | -17.6400 | H | 0 | 0 | 0 | 0 | 0 | 0 | 0 | 0 | 0 | 0 | 0 | 0 | 0 |
| 22.7500 | -12.5490 | -18.8770 | H | 0 | 0 | 0 | 0 | 0 | 0 | 0 | 0 | 0 | 0 | 0 | 0 | 0 |
| 23.3980 | -13.3200 | -16.9830 | C | 0 | 0 | 0 | 0 | 0 | 0 | 0 | 0 | 0 | 0 | 0 | 0 | 0 |
| 22.9710 | -14.3260 | -17.0710 | H | 0 | 0 | 0 | 0 | 0 | 0 | 0 | 0 | 0 | 0 | 0 | 0 | 0 |
| 24.4260 | -13.3450 | -17.3640 | H | 0 | 0 | 0 | 0 | 0 | 0 | 0 | 0 | 0 | 0 | 0 | 0 | 0 |
| 23.4460 | -12.9420 | -15.5220 | C | 0 | 0 | 0 | 0 | 0 | 0 | 0 | 0 | 0 | 0 | 0 | 0 | 0 |
| 24.4810 | -13.5900 | -14.9150 | O | 0 | 0 | 0 | 0 | 0 | 0 | 0 | 0 | 0 | 0 | 0 | 0 | 0 |
| 24.6260 | -13.3260 | -13.5100 | C | 0 | 0 | 0 | 0 | 0 | 0 | 0 | 0 | 0 | 0 | 0 | 0 | 0 |
| 24.7650 | -12.2470 | -13.3640 | H | 0 | 0 | 0 | 0 | 0 | 0 | 0 | 0 | 0 | 0 | 0 | 0 | 0 |
| 23.7070 | -13.6360 | -12.9960 | H | 0 | 0 | 0 | 0 | 0 | 0 | 0 | 0 | 0 | 0 | 0 | 0 | 0 |
| 25.8390 | -14.0980 | -12.9400 | C | 0 | 0 | 0 | 0 | 0 | 0 | 0 | 0 | 0 | 0 | 0 | 0 | 0 |
| 25.9470 | -13.7820 | -11.4310 | C | 0 | 0 | 0 | 0 | 0 | 0 | 0 | 0 | 0 | 0 | 0 | 0 | 0 |
| 26.0860 | -12.7030 | -11.2820 | H | 0 | 0 | 0 | 0 | 0 | 0 | 0 | 0 | 0 | 0 | 0 | 0 | 0 |
| 25.0290 | -14.0930 | -10.9160 | H | 0 | 0 | 0 | 0 | 0 | 0 | 0 | 0 | 0 | 0 | 0 | 0 | 0 |
| 27.0640 | -14.4750 | -10.8510 | O | 0 | 0 | 0 | 0 | 0 | 0 | 0 | 0 | 0 | 0 | 0 | 0 | 0 |
| 27.2290 | -14.2750 | -9.5120  | C | 0 | 0 | 0 | 0 | 0 | 0 | 0 | 0 | 0 | 0 | 0 | 0 | 0 |
| 28.4260 | -15.0580 | -9.0360  | C | 0 | 0 | 0 | 0 | 0 | 0 | 0 | 0 | 0 | 0 | 0 | 0 | 0 |
| 28.2810 | -16.1010 | -9.3320  | H | 0 | 0 | 0 | 0 | 0 | 0 | 0 | 0 | 0 | 0 | 0 | 0 | 0 |
| 29.3130 | -14.6620 | -9.5440  | H | 0 | 0 | 0 | 0 | 0 | 0 | 0 | 0 | 0 | 0 | 0 | 0 | 0 |
| 28.5950 | -14.9340 | -7.5180  | C | 0 | 0 | 0 | 0 | 0 | 0 | 0 | 0 | 0 | 0 | 0 | 0 | 0 |
| 27.7160 | -15.3310 | -6.9930  | H | 0 | 0 | 0 | 0 | 0 | 0 | 0 | 0 | 0 | 0 | 0 | 0 | 0 |
| 28.6290 | -13.8620 | -7.2880  | H | 0 | 0 | 0 | 0 | 0 | 0 | 0 | 0 | 0 | 0 | 0 | 0 | 0 |
| 22.6560 | -12.1900 | -14.9650 | O | 0 | 0 | 0 | 0 | 0 | 0 | 0 | 0 | 0 | 0 | 0 | 0 | 0 |
| 26.5190 | -13.5650 | -8.8140  | O | 0 | 0 | 0 | 0 | 0 | 0 | 0 | 0 | 0 | 0 | 0 | 0 | 0 |
| 25.6470 | -15.6130 | -13.1500 | C | 0 | 0 | 0 | 0 | 0 | 0 | 0 | 0 | 0 | 0 | 0 | 0 | 0 |
| 26.4910 | -16.1840 | -12.7480 | H | 0 | 0 | 0 | 0 | 0 | 0 | 0 | 0 | 0 | 0 | 0 | 0 | 0 |
| 25.5620 | -15.8640 | -14.2120 | H | 0 | 0 | 0 | 0 | 0 | 0 | 0 | 0 | 0 | 0 | 0 | 0 | 0 |
| 24.7380 | -15.9660 | -12.6500 | H | 0 | 0 | 0 | 0 | 0 | 0 | 0 | 0 | 0 | 0 | 0 | 0 | 0 |
| 27.1280 | -13.6670 | -13.6650 | C | 0 | 0 | 0 | 0 | 0 | 0 | 0 | 0 | 0 | 0 | 0 | 0 | 0 |
| 27.0750 | -13.8750 | -14.7390 | H | 0 | 0 | 0 | 0 | 0 | 0 | 0 | 0 | 0 | 0 | 0 | 0 | 0 |
| 28.0050 | -14.1950 | -13.2750 | H | 0 | 0 | 0 | 0 | 0 | 0 | 0 | 0 | 0 | 0 | 0 | 0 | 0 |
| 27.3050 | -12.5920 | -13.5420 | H | 0 | 0 | 0 | 0 | 0 | 0 | 0 | 0 | 0 | 0 | 0 | 0 | 0 |
| 30.8860 | -19.2210 | -7.0810  | N | 0 | 0 | 0 | 0 | 0 | 0 | 0 | 0 | 0 | 0 | 0 | 0 | 0 |
| 30.7030 | -20.0310 | -8.1660  | C | 0 | 0 | 0 | 0 | 0 | 0 | 0 | 0 | 0 | 0 | 0 | 0 | 0 |
| 30.6400 | -19.6530 | -9.1770  | H | 0 | 0 | 0 | 0 | 0 | 0 | 0 | 0 | 0 | 0 | 0 | 0 | 0 |
| 30.6380 | -21.3030 | -7.6460  | C | 0 | 0 | 0 | 0 | 0 | 0 | 0 | 0 | 0 | 0 | 0 | 0 | 0 |
| 30.5000 | -22.2320 | -8.1820  | H | 0 | 0 | 0 | 0 | 0 | 0 | 0 | 0 | 0 | 0 | 0 | 0 | 0 |
| 30.7750 | -21.2830 | -6.2800  | N | 0 | 0 | 0 | 0 | 0 | 0 | 0 | 0 | 0 | 0 | 0 | 0 | 0 |
| 30.9190 | -20.0140 | -5.9700  | C | 0 | 0 | 0 | 0 | 0 | 0 | 0 | 0 | 0 | 0 | 0 | 0 | 0 |
| 31.0490 | -19.6200 | -4.9710  | H | 0 | 0 | 0 | 0 | 0 | 0 | 0 | 0 | 0 | 0 | 0 | 0 | 0 |
| 31.0310 | -17.7780 | -7.1010  | C | 0 | 0 | 0 | 0 | 0 | 0 | 0 | 0 | 0 | 0 | 0 | 0 | 0 |
| 31.7050 | -17.5140 | -6.2790  | H | 0 | 0 | 0 | 0 | 0 | 0 | 0 | 0 | 0 | 0 | 0 | 0 | 0 |
| 31.5360 | -17.5130 | -8.0380  | H | 0 | 0 | 0 | 0 | 0 | 0 | 0 | 0 | 0 | 0 | 0 | 0 | 0 |
| 29.6770 | -17.0610 | -6.9930  | C | 0 | 0 | 0 | 0 | 0 | 0 | 0 | 0 | 0 | 0 | 0 | 0 | 0 |
| 29.0620 | -17.4150 | -7.8290  | H | 0 | 0 | 0 | 0 | 0 | 0 | 0 | 0 | 0 | 0 | 0 | 0 | 0 |
| 29.1420 | -17.3660 | -6.0840  | H | 0 | 0 | 0 | 0 | 0 | 0 | 0 | 0 | 0 | 0 | 0 | 0 | 0 |
| 29.8350 | -15.5900 | -7.0460  | N | 0 | 0 | 3 | 0 | 0 | 0 | 0 | 0 | 0 | 0 | 0 | 0 | 0 |
| 30.2120 | -15.0640 | -5.7100  | C | 0 | 0 | 0 | 0 | 0 | 0 | 0 | 0 | 0 | 0 | 0 | 0 | 0 |
| 30.9850 | -15.7110 | -5.2790  | H | 0 | 0 | 0 | 0 | 0 | 0 | 0 | 0 | 0 | 0 | 0 | 0 | 0 |
| 29.3620 | -15.1190 | -5.0200  | H | 0 | 0 | 0 | 0 | 0 | 0 | 0 | 0 | 0 | 0 | 0 | 0 | 0 |
| 30.8360 | -13.6630 | -5.7870  | C | 0 | 0 | 0 | 0 | 0 | 0 | 0 | 0 | 0 | 0 | 0 | 0 | 0 |
| 31.8130 | -13.6890 | -5.2870  | H | 0 | 0 | 0 | 0 | 0 | 0 | 0 | 0 | 0 | 0 | 0 | 0 | 0 |
| 31.0030 | -13.3510 | -6.8250  | H | 0 | 0 | 0 | 0 | 0 | 0 | 0 | 0 | 0 | 0 | 0 | 0 | 0 |
| 30.0110 | -12.6020 | -5.0980  | C | 0 | 0 | 0 | 0 | 0 | 0 | 0 | 0 | 0 | 0 | 0 | 0 | 0 |
| 30.7070 | -11.4270 | -5.1010  | O | 0 | 0 | 0 | 0 | 0 | 0 | 0 | 0 | 0 | 0 | 0 | 0 | 0 |
| 30.0640 | -10.2730 | -4.5260  | C | 0 | 0 | 0 | 0 | 0 | 0 | 0 | 0 | 0 | 0 | 0 | 0 | 0 |
| 30.2030 | -9.4570  | -5.2460  | H | 0 | 0 | 0 | 0 | 0 | 0 | 0 | 0 | 0 | 0 | 0 | 0 | 0 |
| 28.9810 | -10.4200 | -4.4340  | H | 0 | 0 | 0 | 0 | 0 | 0 | 0 | 0 | 0 | 0 | 0 | 0 | 0 |
| 30.6860 | -9.8820  | -3.1630  | C | 0 | 0 | 0 | 0 | 0 | 0 | 0 | 0 | 0 | 0 | 0 | 0 | 0 |
| 29.9650 | -8.6080  | -2.6590  | C | 0 | 0 | 0 | 0 | 0 | 0 | 0 | 0 | 0 | 0 | 0 | 0 | 0 |
| 30.0500 | -7.7960  | -3.3920  | H | 0 | 0 | 0 | 0 | 0 | 0 | 0 | 0 | 0 | 0 | 0 | 0 | 0 |
| 28.8930 | -8.8080  | -2.5420  | H | 0 | 0 | 0 | 0 | 0 | 0 | 0 | 0 | 0 | 0 | 0 | 0 | 0 |
| 30.4420 | -8.2040  | -1.3620  | O | 0 | 0 | 0 | 0 | 0 | 0 | 0 | 0 | 0 | 0 | 0 | 0 | 0 |
| 31.1870 | -7.0630  | -1.2900  | C | 0 | 0 | 0 | 0 | 0 | 0 | 0 | 0 | 0 | 0 | 0 | 0 | 0 |
| 31.5800 | -6.8220  | 0.1470   | C | 0 | 0 | 0 | 0 | 0 | 0 | 0 | 0 | 0 | 0 | 0 | 0 | 0 |
| 30.6750 | -6.8590  | 0.7630   | H | 0 | 0 | 0 | 0 | 0 | 0 | 0 | 0 | 0 | 0 | 0 | 0 | 0 |
| 32.2540 | -7.6340  | 0.4400   | H | 0 | 0 | 0 | 0 | 0 | 0 | 0 | 0 | 0 | 0 | 0 | 0 | 0 |
| 32.2610 | -5.4600  | 0.3160   | C | 0 | 0 | 0 | 0 | 0 | 0 | 0 | 0 | 0 | 0 | 0 | 0 | 0 |
| 31.5770 | -4.6960  | -0.0760  | H | 0 | 0 | 0 | 0 | 0 | 0 | 0 | 0 | 0 | 0 | 0 | 0 | 0 |
| 33.1640 | -5.4210  | -0.3080  | H | 0 | 0 | 0 | 0 | 0 | 0 | 0 | 0 | 0 | 0 | 0 | 0 | 0 |
| 28.9010 | -12.7610 | -4.6120  | O | 0 | 0 | 0 | 0 | 0 | 0 | 0 | 0 | 0 | 0 | 0 | 0 | 0 |







|         |    |         |   |         |   |   |   |   |   |   |   |   |   |   |   |   |   |
|---------|----|---------|---|---------|---|---|---|---|---|---|---|---|---|---|---|---|---|
| 68.1490 |    | -4.7000 |   | -4.3370 | H | 0 | 0 | 0 | 0 | 0 | 0 | 0 | 0 | 0 | 0 | 0 | 0 |
| 66.4010 |    | -4.4250 |   | -4.2930 | H | 0 | 0 | 0 | 0 | 0 | 0 | 0 | 0 | 0 | 0 | 0 | 0 |
| 67.5430 |    | -3.1380 |   | -2.9420 | C | 0 | 0 | 0 | 0 | 0 | 0 | 0 | 0 | 0 | 0 | 0 | 0 |
| 66.6930 |    | -2.8950 |   | -2.2940 | H | 0 | 0 | 0 | 0 | 0 | 0 | 0 | 0 | 0 | 0 | 0 | 0 |
| 68.3990 |    | -3.2670 |   | -2.2670 | H | 0 | 0 | 0 | 0 | 0 | 0 | 0 | 0 | 0 | 0 | 0 | 0 |
| 67.8650 |    | -2.0210 |   | -3.8340 | N | 0 | 0 | 3 | 0 | 0 | 0 | 0 | 0 | 0 | 0 | 0 | 0 |
| 68.2140 |    | -1.2380 |   | -3.2780 | H | 0 | 0 | 0 | 0 | 0 | 0 | 0 | 0 | 0 | 0 | 0 | 0 |
| 1       | 2  | 1       | 0 | 0       | 0 | 0 | 0 | 0 | 0 | 0 | 0 | 0 | 0 | 0 | 0 | 0 | 0 |
| 1       | 7  | 1       | 0 | 0       | 0 | 0 | 0 | 0 | 0 | 0 | 0 | 0 | 0 | 0 | 0 | 0 | 0 |
| 1       | 9  | 1       | 0 | 0       | 0 | 0 | 0 | 0 | 0 | 0 | 0 | 0 | 0 | 0 | 0 | 0 | 0 |
| 2       | 3  | 1       | 0 | 0       | 0 | 0 | 0 | 0 | 0 | 0 | 0 | 0 | 0 | 0 | 0 | 0 | 0 |
| 2       | 4  | 2       | 0 | 0       | 0 | 0 | 0 | 0 | 0 | 0 | 0 | 0 | 0 | 0 | 0 | 0 | 0 |
| 4       | 5  | 1       | 0 | 0       | 0 | 0 | 0 | 0 | 0 | 0 | 0 | 0 | 0 | 0 | 0 | 0 | 0 |
| 4       | 6  | 1       | 0 | 0       | 0 | 0 | 0 | 0 | 0 | 0 | 0 | 0 | 0 | 0 | 0 | 0 | 0 |
| 6       | 7  | 2       | 0 | 0       | 0 | 0 | 0 | 0 | 0 | 0 | 0 | 0 | 0 | 0 | 0 | 0 | 0 |
| 7       | 8  | 1       | 0 | 0       | 0 | 0 | 0 | 0 | 0 | 0 | 0 | 0 | 0 | 0 | 0 | 0 | 0 |
| 9       | 10 | 1       | 0 | 0       | 0 | 0 | 0 | 0 | 0 | 0 | 0 | 0 | 0 | 0 | 0 | 0 | 0 |
| 9       | 11 | 1       | 0 | 0       | 0 | 0 | 0 | 0 | 0 | 0 | 0 | 0 | 0 | 0 | 0 | 0 | 0 |
| 9       | 12 | 1       | 0 | 0       | 0 | 0 | 0 | 0 | 0 | 0 | 0 | 0 | 0 | 0 | 0 | 0 | 0 |
| 12      | 13 | 1       | 0 | 0       | 0 | 0 | 0 | 0 | 0 | 0 | 0 | 0 | 0 | 0 | 0 | 0 | 0 |
| 12      | 14 | 1       | 0 | 0       | 0 | 0 | 0 | 0 | 0 | 0 | 0 | 0 | 0 | 0 | 0 | 0 | 0 |
| 12      | 15 | 1       | 0 | 0       | 0 | 0 | 0 | 0 | 0 | 0 | 0 | 0 | 0 | 0 | 0 | 0 | 0 |
| 15      | 16 | 1       | 0 | 0       | 0 | 0 | 0 | 0 | 0 | 0 | 0 | 0 | 0 | 0 | 0 | 0 | 0 |
| 15      | 17 | 1       | 0 | 0       | 0 | 0 | 0 | 0 | 0 | 0 | 0 | 0 | 0 | 0 | 0 | 0 | 0 |
| 17      | 18 | 1       | 0 | 0       | 0 | 0 | 0 | 0 | 0 | 0 | 0 | 0 | 0 | 0 | 0 | 0 | 0 |
| 17      | 19 | 1       | 0 | 0       | 0 | 0 | 0 | 0 | 0 | 0 | 0 | 0 | 0 | 0 | 0 | 0 | 0 |
| 17      | 20 | 1       | 0 | 0       | 0 | 0 | 0 | 0 | 0 | 0 | 0 | 0 | 0 | 0 | 0 | 0 | 0 |
| 20      | 21 | 1       | 0 | 0       | 0 | 0 | 0 | 0 | 0 | 0 | 0 | 0 | 0 | 0 | 0 | 0 | 0 |
| 20      | 22 | 1       | 0 | 0       | 0 | 0 | 0 | 0 | 0 | 0 | 0 | 0 | 0 | 0 | 0 | 0 | 0 |
| 20      | 23 | 1       | 0 | 0       | 0 | 0 | 0 | 0 | 0 | 0 | 0 | 0 | 0 | 0 | 0 | 0 | 0 |
| 23      | 24 | 1       | 0 | 0       | 0 | 0 | 0 | 0 | 0 | 0 | 0 | 0 | 0 | 0 | 0 | 0 | 0 |
| 23      | 40 | 2       | 0 | 0       | 0 | 0 | 0 | 0 | 0 | 0 | 0 | 0 | 0 | 0 | 0 | 0 | 0 |
| 24      | 25 | 1       | 0 | 0       | 0 | 0 | 0 | 0 | 0 | 0 | 0 | 0 | 0 | 0 | 0 | 0 | 0 |
| 25      | 26 | 1       | 0 | 0       | 0 | 0 | 0 | 0 | 0 | 0 | 0 | 0 | 0 | 0 | 0 | 0 | 0 |
| 25      | 27 | 1       | 0 | 0       | 0 | 0 | 0 | 0 | 0 | 0 | 0 | 0 | 0 | 0 | 0 | 0 | 0 |
| 25      | 28 | 1       | 0 | 0       | 0 | 0 | 0 | 0 | 0 | 0 | 0 | 0 | 0 | 0 | 0 | 0 | 0 |
| 28      | 29 | 1       | 0 | 0       | 0 | 0 | 0 | 0 | 0 | 0 | 0 | 0 | 0 | 0 | 0 | 0 | 0 |
| 28      | 42 | 1       | 0 | 0       | 0 | 0 | 0 | 0 | 0 | 0 | 0 | 0 | 0 | 0 | 0 | 0 | 0 |
| 28      | 46 | 1       | 0 | 0       | 0 | 0 | 0 | 0 | 0 | 0 | 0 | 0 | 0 | 0 | 0 | 0 | 0 |
| 29      | 30 | 1       | 0 | 0       | 0 | 0 | 0 | 0 | 0 | 0 | 0 | 0 | 0 | 0 | 0 | 0 | 0 |
| 29      | 31 | 1       | 0 | 0       | 0 | 0 | 0 | 0 | 0 | 0 | 0 | 0 | 0 | 0 | 0 | 0 | 0 |
| 29      | 32 | 1       | 0 | 0       | 0 | 0 | 0 | 0 | 0 | 0 | 0 | 0 | 0 | 0 | 0 | 0 | 0 |
| 32      | 33 | 1       | 0 | 0       | 0 | 0 | 0 | 0 | 0 | 0 | 0 | 0 | 0 | 0 | 0 | 0 | 0 |
| 33      | 34 | 1       | 0 | 0       | 0 | 0 | 0 | 0 | 0 | 0 | 0 | 0 | 0 | 0 | 0 | 0 | 0 |
| 33      | 41 | 2       | 0 | 0       | 0 | 0 | 0 | 0 | 0 | 0 | 0 | 0 | 0 | 0 | 0 | 0 | 0 |
| 34      | 35 | 1       | 0 | 0       | 0 | 0 | 0 | 0 | 0 | 0 | 0 | 0 | 0 | 0 | 0 | 0 | 0 |
| 34      | 36 | 1       | 0 | 0       | 0 | 0 | 0 | 0 | 0 | 0 | 0 | 0 | 0 | 0 | 0 | 0 | 0 |
| 34      | 37 | 1       | 0 | 0       | 0 | 0 | 0 | 0 | 0 | 0 | 0 | 0 | 0 | 0 | 0 | 0 | 0 |
| 37      | 38 | 1       | 0 | 0       | 0 | 0 | 0 | 0 | 0 | 0 | 0 | 0 | 0 | 0 | 0 | 0 | 0 |
| 37      | 39 | 1       | 0 | 0       | 0 | 0 | 0 | 0 | 0 | 0 | 0 | 0 | 0 | 0 | 0 | 0 | 0 |
| 37      | 64 | 1       | 0 | 0       | 0 | 0 | 0 | 0 | 0 | 0 | 0 | 0 | 0 | 0 | 0 | 0 | 0 |
| 42      | 43 | 1       | 0 | 0       | 0 | 0 | 0 | 0 | 0 | 0 | 0 | 0 | 0 | 0 | 0 | 0 | 0 |
| 42      | 44 | 1       | 0 | 0       | 0 | 0 | 0 | 0 | 0 | 0 | 0 | 0 | 0 | 0 | 0 | 0 | 0 |
| 42      | 45 | 1       | 0 | 0       | 0 | 0 | 0 | 0 | 0 | 0 | 0 | 0 | 0 | 0 | 0 | 0 | 0 |
| 46      | 47 | 1       | 0 | 0       | 0 | 0 | 0 | 0 | 0 | 0 | 0 | 0 | 0 | 0 | 0 | 0 | 0 |
| 46      | 48 | 1       | 0 | 0       | 0 | 0 | 0 | 0 | 0 | 0 | 0 | 0 | 0 | 0 | 0 | 0 | 0 |
| 46      | 49 | 1       | 0 | 0       | 0 | 0 | 0 | 0 | 0 | 0 | 0 | 0 | 0 | 0 | 0 | 0 | 0 |
| 50      | 51 | 1       | 0 | 0       | 0 | 0 | 0 | 0 | 0 | 0 | 0 | 0 | 0 | 0 | 0 | 0 | 0 |
| 50      | 56 | 1       | 0 | 0       | 0 | 0 | 0 | 0 | 0 | 0 | 0 | 0 | 0 | 0 | 0 | 0 | 0 |
| 50      | 58 | 1       | 0 | 0       | 0 | 0 | 0 | 0 | 0 | 0 | 0 | 0 | 0 | 0 | 0 | 0 | 0 |
| 51      | 52 | 1       | 0 | 0       | 0 | 0 | 0 | 0 | 0 | 0 | 0 | 0 | 0 | 0 | 0 | 0 | 0 |
| 51      | 53 | 2       | 0 | 0       | 0 | 0 | 0 | 0 | 0 | 0 | 0 | 0 | 0 | 0 | 0 | 0 | 0 |
| 53      | 54 | 1       | 0 | 0       | 0 | 0 | 0 | 0 | 0 | 0 | 0 | 0 | 0 | 0 | 0 | 0 | 0 |
| 53      | 55 | 1       | 0 | 0       | 0 | 0 | 0 | 0 | 0 | 0 | 0 | 0 | 0 | 0 | 0 | 0 | 0 |
| 55      | 56 | 2       | 0 | 0       | 0 | 0 | 0 | 0 | 0 | 0 | 0 | 0 | 0 | 0 | 0 | 0 | 0 |
| 56      | 57 | 1       | 0 | 0       | 0 | 0 | 0 | 0 | 0 | 0 | 0 | 0 | 0 | 0 | 0 | 0 | 0 |
| 58      | 59 | 1       | 0 | 0       | 0 | 0 | 0 | 0 | 0 | 0 | 0 | 0 | 0 | 0 | 0 | 0 | 0 |
| 58      | 60 | 1       | 0 | 0       | 0 | 0 | 0 | 0 | 0 | 0 | 0 | 0 | 0 | 0 | 0 | 0 | 0 |
| 58      | 61 | 1       | 0 | 0       | 0 | 0 | 0 | 0 | 0 | 0 | 0 | 0 | 0 | 0 | 0 | 0 | 0 |
| 61      | 62 | 1       | 0 | 0       | 0 | 0 | 0 | 0 | 0 | 0 | 0 | 0 | 0 | 0 | 0 | 0 | 0 |
| 61      | 63 | 1       | 0 | 0       | 0 | 0 | 0 | 0 | 0 | 0 | 0 | 0 | 0 | 0 | 0 | 0 | 0 |
| 61      | 64 | 1       | 0 | 0       | 0 | 0 | 0 | 0 | 0 | 0 | 0 | 0 | 0 | 0 | 0 | 0 | 0 |
| 64      | 65 | 1       | 0 | 0       | 0 | 0 | 0 | 0 | 0 | 0 | 0 | 0 | 0 | 0 | 0 | 0 | 0 |
| 65      | 66 | 1       | 0 | 0       | 0 | 0 | 0 | 0 | 0 | 0 | 0 | 0 | 0 | 0 | 0 | 0 | 0 |
| 65      | 67 | 1       | 0 | 0       | 0 | 0 | 0 | 0 | 0 | 0 | 0 | 0 | 0 | 0 | 0 | 0 | 0 |
| 65      | 68 | 1       | 0 | 0       | 0 | 0 | 0 | 0 | 0 | 0 | 0 | 0 | 0 | 0 | 0 | 0 | 0 |
| 68      | 69 | 1       | 0 | 0       | 0 | 0 | 0 | 0 | 0 | 0 | 0 | 0 | 0 | 0 | 0 | 0 | 0 |
| 68      | 70 | 1       | 0 | 0       | 0 | 0 | 0 | 0 | 0 | 0 | 0 | 0 | 0 | 0 | 0 | 0 | 0 |
| 68      | 71 | 1       | 0 | 0       | 0 | 0 | 0 | 0 | 0 | 0 | 0 | 0 | 0 | 0 | 0 | 0 | 0 |
| 71      | 72 | 1       | 0 | 0       | 0 | 0 | 0 | 0 | 0 | 0 | 0 | 0 | 0 | 0 | 0 | 0 | 0 |
| 71      | 88 | 2       | 0 | 0       | 0 | 0 | 0 | 0 | 0 | 0 | 0 | 0 | 0 | 0 | 0 | 0 | 0 |

|     |     |   |   |   |   |   |
|-----|-----|---|---|---|---|---|
| 72  | 73  | 1 | 0 | 0 | 0 | 0 |
| 73  | 74  | 1 | 0 | 0 | 0 | 0 |
| 73  | 75  | 1 | 0 | 0 | 0 | 0 |
| 73  | 76  | 1 | 0 | 0 | 0 | 0 |
| 76  | 77  | 1 | 0 | 0 | 0 | 0 |
| 76  | 90  | 1 | 0 | 0 | 0 | 0 |
| 76  | 94  | 1 | 0 | 0 | 0 | 0 |
| 77  | 78  | 1 | 0 | 0 | 0 | 0 |
| 77  | 79  | 1 | 0 | 0 | 0 | 0 |
| 77  | 80  | 1 | 0 | 0 | 0 | 0 |
| 80  | 81  | 1 | 0 | 0 | 0 | 0 |
| 81  | 82  | 1 | 0 | 0 | 0 | 0 |
| 81  | 89  | 2 | 0 | 0 | 0 | 0 |
| 82  | 83  | 1 | 0 | 0 | 0 | 0 |
| 82  | 84  | 1 | 0 | 0 | 0 | 0 |
| 82  | 85  | 1 | 0 | 0 | 0 | 0 |
| 85  | 86  | 1 | 0 | 0 | 0 | 0 |
| 85  | 87  | 1 | 0 | 0 | 0 | 0 |
| 85  | 112 | 1 | 0 | 0 | 0 | 0 |
| 90  | 91  | 1 | 0 | 0 | 0 | 0 |
| 90  | 92  | 1 | 0 | 0 | 0 | 0 |
| 90  | 93  | 1 | 0 | 0 | 0 | 0 |
| 94  | 95  | 1 | 0 | 0 | 0 | 0 |
| 94  | 96  | 1 | 0 | 0 | 0 | 0 |
| 94  | 97  | 1 | 0 | 0 | 0 | 0 |
| 98  | 99  | 1 | 0 | 0 | 0 | 0 |
| 98  | 104 | 1 | 0 | 0 | 0 | 0 |
| 98  | 106 | 1 | 0 | 0 | 0 | 0 |
| 99  | 100 | 1 | 0 | 0 | 0 | 0 |
| 99  | 101 | 2 | 0 | 0 | 0 | 0 |
| 101 | 102 | 1 | 0 | 0 | 0 | 0 |
| 101 | 103 | 1 | 0 | 0 | 0 | 0 |
| 103 | 104 | 2 | 0 | 0 | 0 | 0 |
| 104 | 105 | 1 | 0 | 0 | 0 | 0 |
| 106 | 107 | 1 | 0 | 0 | 0 | 0 |
| 106 | 108 | 1 | 0 | 0 | 0 | 0 |
| 106 | 109 | 1 | 0 | 0 | 0 | 0 |
| 109 | 110 | 1 | 0 | 0 | 0 | 0 |
| 109 | 111 | 1 | 0 | 0 | 0 | 0 |
| 109 | 112 | 1 | 0 | 0 | 0 | 0 |
| 112 | 113 | 1 | 0 | 0 | 0 | 0 |
| 113 | 114 | 1 | 0 | 0 | 0 | 0 |
| 113 | 115 | 1 | 0 | 0 | 0 | 0 |
| 113 | 116 | 1 | 0 | 0 | 0 | 0 |
| 116 | 117 | 1 | 0 | 0 | 0 | 0 |
| 116 | 118 | 1 | 0 | 0 | 0 | 0 |
| 116 | 119 | 1 | 0 | 0 | 0 | 0 |
| 119 | 120 | 1 | 0 | 0 | 0 | 0 |
| 119 | 136 | 2 | 0 | 0 | 0 | 0 |
| 120 | 121 | 1 | 0 | 0 | 0 | 0 |
| 121 | 122 | 1 | 0 | 0 | 0 | 0 |
| 121 | 123 | 1 | 0 | 0 | 0 | 0 |
| 121 | 124 | 1 | 0 | 0 | 0 | 0 |
| 124 | 125 | 1 | 0 | 0 | 0 | 0 |
| 124 | 138 | 1 | 0 | 0 | 0 | 0 |
| 124 | 142 | 1 | 0 | 0 | 0 | 0 |
| 125 | 126 | 1 | 0 | 0 | 0 | 0 |
| 125 | 127 | 1 | 0 | 0 | 0 | 0 |
| 125 | 128 | 1 | 0 | 0 | 0 | 0 |
| 128 | 129 | 1 | 0 | 0 | 0 | 0 |
| 129 | 130 | 1 | 0 | 0 | 0 | 0 |
| 129 | 137 | 2 | 0 | 0 | 0 | 0 |
| 130 | 131 | 1 | 0 | 0 | 0 | 0 |
| 130 | 132 | 1 | 0 | 0 | 0 | 0 |
| 130 | 133 | 1 | 0 | 0 | 0 | 0 |
| 133 | 134 | 1 | 0 | 0 | 0 | 0 |
| 133 | 135 | 1 | 0 | 0 | 0 | 0 |
| 133 | 160 | 1 | 0 | 0 | 0 | 0 |
| 138 | 139 | 1 | 0 | 0 | 0 | 0 |
| 138 | 140 | 1 | 0 | 0 | 0 | 0 |
| 138 | 141 | 1 | 0 | 0 | 0 | 0 |
| 142 | 143 | 1 | 0 | 0 | 0 | 0 |
| 142 | 144 | 1 | 0 | 0 | 0 | 0 |
| 142 | 145 | 1 | 0 | 0 | 0 | 0 |
| 146 | 147 | 1 | 0 | 0 | 0 | 0 |
| 146 | 152 | 1 | 0 | 0 | 0 | 0 |
| 146 | 154 | 1 | 0 | 0 | 0 | 0 |
| 147 | 148 | 1 | 0 | 0 | 0 | 0 |
| 147 | 149 | 2 | 0 | 0 | 0 | 0 |
| 149 | 150 | 1 | 0 | 0 | 0 | 0 |
| 149 | 151 | 1 | 0 | 0 | 0 | 0 |

|        |   |   |   |   |   |
|--------|---|---|---|---|---|
| 151152 | 2 | 0 | 0 | 0 | 0 |
| 152153 | 1 | 0 | 0 | 0 | 0 |
| 154155 | 1 | 0 | 0 | 0 | 0 |
| 154156 | 1 | 0 | 0 | 0 | 0 |
| 154157 | 1 | 0 | 0 | 0 | 0 |
| 157158 | 1 | 0 | 0 | 0 | 0 |
| 157159 | 1 | 0 | 0 | 0 | 0 |
| 157160 | 1 | 0 | 0 | 0 | 0 |
| 160161 | 1 | 0 | 0 | 0 | 0 |
| 161162 | 1 | 0 | 0 | 0 | 0 |
| 161163 | 1 | 0 | 0 | 0 | 0 |
| 161164 | 1 | 0 | 0 | 0 | 0 |
| 164165 | 1 | 0 | 0 | 0 | 0 |
| 164166 | 1 | 0 | 0 | 0 | 0 |
| 164167 | 1 | 0 | 0 | 0 | 0 |
| 167168 | 1 | 0 | 0 | 0 | 0 |
| 167184 | 2 | 0 | 0 | 0 | 0 |
| 168169 | 1 | 0 | 0 | 0 | 0 |
| 169170 | 1 | 0 | 0 | 0 | 0 |
| 169171 | 1 | 0 | 0 | 0 | 0 |
| 169172 | 1 | 0 | 0 | 0 | 0 |
| 172173 | 1 | 0 | 0 | 0 | 0 |
| 172186 | 1 | 0 | 0 | 0 | 0 |
| 172190 | 1 | 0 | 0 | 0 | 0 |
| 173174 | 1 | 0 | 0 | 0 | 0 |
| 173175 | 1 | 0 | 0 | 0 | 0 |
| 173176 | 1 | 0 | 0 | 0 | 0 |
| 176177 | 1 | 0 | 0 | 0 | 0 |
| 177178 | 1 | 0 | 0 | 0 | 0 |
| 177185 | 2 | 0 | 0 | 0 | 0 |
| 178179 | 1 | 0 | 0 | 0 | 0 |
| 178180 | 1 | 0 | 0 | 0 | 0 |
| 178181 | 1 | 0 | 0 | 0 | 0 |
| 181182 | 1 | 0 | 0 | 0 | 0 |
| 181183 | 1 | 0 | 0 | 0 | 0 |
| 181208 | 1 | 0 | 0 | 0 | 0 |
| 186187 | 1 | 0 | 0 | 0 | 0 |
| 186188 | 1 | 0 | 0 | 0 | 0 |
| 186189 | 1 | 0 | 0 | 0 | 0 |
| 190191 | 1 | 0 | 0 | 0 | 0 |
| 190192 | 1 | 0 | 0 | 0 | 0 |
| 190193 | 1 | 0 | 0 | 0 | 0 |
| 194195 | 1 | 0 | 0 | 0 | 0 |
| 194200 | 1 | 0 | 0 | 0 | 0 |
| 194202 | 1 | 0 | 0 | 0 | 0 |
| 195196 | 1 | 0 | 0 | 0 | 0 |
| 195197 | 2 | 0 | 0 | 0 | 0 |
| 197198 | 1 | 0 | 0 | 0 | 0 |
| 197199 | 1 | 0 | 0 | 0 | 0 |
| 199200 | 2 | 0 | 0 | 0 | 0 |
| 200201 | 1 | 0 | 0 | 0 | 0 |
| 202203 | 1 | 0 | 0 | 0 | 0 |
| 202204 | 1 | 0 | 0 | 0 | 0 |
| 202205 | 1 | 0 | 0 | 0 | 0 |
| 205206 | 1 | 0 | 0 | 0 | 0 |
| 205207 | 1 | 0 | 0 | 0 | 0 |
| 205208 | 1 | 0 | 0 | 0 | 0 |
| 208209 | 1 | 0 | 0 | 0 | 0 |
| 209210 | 1 | 0 | 0 | 0 | 0 |
| 209211 | 1 | 0 | 0 | 0 | 0 |
| 209212 | 1 | 0 | 0 | 0 | 0 |
| 212213 | 1 | 0 | 0 | 0 | 0 |
| 212214 | 1 | 0 | 0 | 0 | 0 |
| 212215 | 1 | 0 | 0 | 0 | 0 |
| 215216 | 1 | 0 | 0 | 0 | 0 |
| 215232 | 2 | 0 | 0 | 0 | 0 |
| 216217 | 1 | 0 | 0 | 0 | 0 |
| 217218 | 1 | 0 | 0 | 0 | 0 |
| 217219 | 1 | 0 | 0 | 0 | 0 |
| 217220 | 1 | 0 | 0 | 0 | 0 |
| 220221 | 1 | 0 | 0 | 0 | 0 |
| 220234 | 1 | 0 | 0 | 0 | 0 |
| 220238 | 1 | 0 | 0 | 0 | 0 |
| 221222 | 1 | 0 | 0 | 0 | 0 |
| 221223 | 1 | 0 | 0 | 0 | 0 |
| 221224 | 1 | 0 | 0 | 0 | 0 |
| 224225 | 1 | 0 | 0 | 0 | 0 |
| 225226 | 1 | 0 | 0 | 0 | 0 |
| 225233 | 2 | 0 | 0 | 0 | 0 |
| 226227 | 1 | 0 | 0 | 0 | 0 |
| 226228 | 1 | 0 | 0 | 0 | 0 |

```

226229 1 0 0 0 0
229230 1 0 0 0 0
229231 1 0 0 0 0
229256 1 0 0 0 0
234235 1 0 0 0 0
234236 1 0 0 0 0
234237 1 0 0 0 0
238239 1 0 0 0 0
238240 1 0 0 0 0
238241 1 0 0 0 0
242243 1 0 0 0 0
242248 1 0 0 0 0
242250 1 0 0 0 0
243244 1 0 0 0 0
243245 2 0 0 0 0
245246 1 0 0 0 0
245247 1 0 0 0 0
247248 2 0 0 0 0
248249 1 0 0 0 0
250251 1 0 0 0 0
250252 1 0 0 0 0
250253 1 0 0 0 0
253254 1 0 0 0 0
253255 1 0 0 0 0
253256 1 0 0 0 0
256257 1 0 0 0 0

```

```

M END
> <NAME>
F94_12

```

```

$$$$
II28_12
MOE2012 3D

```

```

227226 0 0 1 0 0 0 0 0999 V2000
7.1300 6.8780 8.8070 O 0 0 0 0 0 0 0 0 0 0 0 0 0 0 0 0
7.0890 7.7790 9.1730 H 0 0 0 0 0 0 0 0 0 0 0 0 0 0 0 0
7.4960 6.0100 9.8690 C 0 0 0 0 0 0 0 0 0 0 0 0 0 0 0 0
8.4640 6.3340 10.2660 H 0 0 0 0 0 0 0 0 0 0 0 0 0 0 0 0
6.7420 6.0880 10.6590 H 0 0 0 0 0 0 0 0 0 0 0 0 0 0 0 0
7.5770 4.5890 9.3310 C 0 0 0 0 0 0 0 0 0 0 0 0 0 0 0 0
6.6110 4.3110 8.8920 H 0 0 0 0 0 0 0 0 0 0 0 0 0 0 0 0
8.3020 4.5530 8.5080 H 0 0 0 0 0 0 0 0 0 0 0 0 0 0 0 0
7.9670 3.5960 10.4250 C 0 0 0 0 0 0 0 0 0 0 0 0 0 0 0 0
8.9400 3.8800 10.8460 H 0 0 0 0 0 0 0 0 0 0 0 0 0 0 0 0
7.2330 3.6550 11.2360 H 0 0 0 0 0 0 0 0 0 0 0 0 0 0 0 0
8.0380 2.1700 9.8720 C 0 0 0 0 0 0 0 0 0 0 0 0 0 0 0 0
7.0710 1.8690 9.4500 H 0 0 0 0 0 0 0 0 0 0 0 0 0 0 0 0
8.7530 2.1480 9.0420 H 0 0 0 0 0 0 0 0 0 0 0 0 0 0 0 0
8.4890 1.1900 10.8610 N 0 0 3 0 0 0 0 0 0 0 0 0 0 0 0 0
9.3440 1.5230 11.3080 H 0 0 0 0 0 0 0 0 0 0 0 0 0 0 0 0
7.4770 0.8900 11.8750 C 0 0 0 0 0 0 0 0 0 0 0 0 0 0 0 0
7.3020 1.7690 12.5050 H 0 0 0 0 0 0 0 0 0 0 0 0 0 0 0 0
6.5270 0.6230 11.3960 H 0 0 0 0 0 0 0 0 0 0 0 0 0 0 0 0
7.9440 -0.2540 12.7660 C 0 0 0 0 0 0 0 0 0 0 0 0 0 0 0 0
8.9490 -0.0700 13.1630 H 0 0 0 0 0 0 0 0 0 0 0 0 0 0 0 0
7.2840 -0.3520 13.6360 H 0 0 0 0 0 0 0 0 0 0 0 0 0 0 0 0
7.9010 -1.5640 12.0250 C 0 0 0 0 0 0 0 0 0 0 0 0 0 0 0 0
9.1620 -2.0300 11.8010 O 0 0 0 0 0 0 0 0 0 0 0 0 0 0 0 0
9.2230 -3.2740 11.0900 C 0 0 0 0 0 0 0 0 0 0 0 0 0 0 0 0
8.7670 -4.0610 11.7030 H 0 0 0 0 0 0 0 0 0 0 0 0 0 0 0 0
8.6780 -3.1860 10.1430 H 0 0 0 0 0 0 0 0 0 0 0 0 0 0 0 0
10.6860 -3.5940 10.8230 C 0 0 0 0 0 0 0 0 0 0 0 0 0 0 0 0
11.1460 -2.7840 10.2420 H 0 0 0 0 0 0 0 0 0 0 0 0 0 0 0 0
11.2460 -3.6110 11.7670 H 0 0 0 0 0 0 0 0 0 0 0 0 0 0 0 0
10.8530 -4.9200 10.0950 C 0 0 0 0 0 0 0 0 0 0 0 0 0 0 0 0
10.4570 -5.7380 10.7080 H 0 0 0 0 0 0 0 0 0 0 0 0 0 0 0 0
10.3290 -4.8950 9.1330 H 0 0 0 0 0 0 0 0 0 0 0 0 0 0 0 0
12.2540 -5.1230 9.8630 O 0 0 0 0 0 0 0 0 0 0 0 0 0 0 0 0
12.5720 -6.3220 9.2960 C 0 0 0 0 0 0 0 0 0 0 0 0 0 0 0 0
14.0650 -6.3970 9.0990 C 0 0 0 0 0 0 0 0 0 0 0 0 0 0 0 0
14.3570 -5.5700 8.4440 H 0 0 0 0 0 0 0 0 0 0 0 0 0 0 0 0
14.5450 -6.2650 10.0760 H 0 0 0 0 0 0 0 0 0 0 0 0 0 0 0 0
14.4710 -7.7470 8.5020 C 0 0 0 0 0 0 0 0 0 0 0 0 0 0 0 0
14.0950 -8.5260 9.1800 H 0 0 0 0 0 0 0 0 0 0 0 0 0 0 0 0
13.9770 -7.9150 7.5360 H 0 0 0 0 0 0 0 0 0 0 0 0 0 0 0 0
6.8670 -2.1280 11.6900 O 0 0 0 0 0 0 0 0 0 0 0 0 0 0 0 0
11.7740 -7.1970 8.9890 O 0 0 0 0 0 0 0 0 0 0 0 0 0 0 0 0
19.8870 -12.6720 8.0960 O 0 0 0 0 0 0 0 0 0 0 0 0 0 0 0 0
20.8500 -12.7970 8.1320 H 0 0 0 0 0 0 0 0 0 0 0 0 0 0 0 0
19.6420 -11.2800 8.2260 C 0 0 0 0 0 0 0 0 0 0 0 0 0 0 0 0

```





|         |          |        |   |   |   |   |   |   |   |   |   |   |   |   |   |   |
|---------|----------|--------|---|---|---|---|---|---|---|---|---|---|---|---|---|---|
| 63.3120 | -7.5170  | 3.7110 | H | 0 | 0 | 0 | 0 | 0 | 0 | 0 | 0 | 0 | 0 | 0 | 0 | 0 |
| 56.1960 | -1.5620  | 0.3480 | O | 0 | 0 | 0 | 0 | 0 | 0 | 0 | 0 | 0 | 0 | 0 | 0 | 0 |
| 62.4010 | -5.3600  | 2.2140 | O | 0 | 0 | 0 | 0 | 0 | 0 | 0 | 0 | 0 | 0 | 0 | 0 | 0 |
| 67.2280 | -9.9380  | 7.9090 | O | 0 | 0 | 0 | 0 | 0 | 0 | 0 | 0 | 0 | 0 | 0 | 0 | 0 |
| 67.0860 | -9.8250  | 8.8650 | H | 0 | 0 | 0 | 0 | 0 | 0 | 0 | 0 | 0 | 0 | 0 | 0 | 0 |
| 66.0070 | -9.6040  | 7.2650 | C | 0 | 0 | 0 | 0 | 0 | 0 | 0 | 0 | 0 | 0 | 0 | 0 | 0 |
| 65.2240 | -10.2760 | 7.6300 | H | 0 | 0 | 0 | 0 | 0 | 0 | 0 | 0 | 0 | 0 | 0 | 0 | 0 |
| 65.7440 | -8.5740  | 7.5290 | H | 0 | 0 | 0 | 0 | 0 | 0 | 0 | 0 | 0 | 0 | 0 | 0 | 0 |
| 66.1910 | -9.7490  | 5.7610 | C | 0 | 0 | 0 | 0 | 0 | 0 | 0 | 0 | 0 | 0 | 0 | 0 | 0 |
| 67.0150 | -9.1030  | 5.4320 | H | 0 | 0 | 0 | 0 | 0 | 0 | 0 | 0 | 0 | 0 | 0 | 0 | 0 |
| 66.5040 | -10.7750 | 5.5310 | H | 0 | 0 | 0 | 0 | 0 | 0 | 0 | 0 | 0 | 0 | 0 | 0 | 0 |
| 64.9110 | -9.4010  | 5.0050 | C | 0 | 0 | 0 | 0 | 0 | 0 | 0 | 0 | 0 | 0 | 0 | 0 | 0 |
| 64.1010 | -10.0650 | 5.3340 | H | 0 | 0 | 0 | 0 | 0 | 0 | 0 | 0 | 0 | 0 | 0 | 0 | 0 |
| 64.6160 | -8.3780  | 5.2640 | H | 0 | 0 | 0 | 0 | 0 | 0 | 0 | 0 | 0 | 0 | 0 | 0 | 0 |
| 65.1070 | -9.5370  | 3.4930 | C | 0 | 0 | 0 | 0 | 0 | 0 | 0 | 0 | 0 | 0 | 0 | 0 | 0 |
| 65.8980 | -8.8650  | 3.1380 | H | 0 | 0 | 0 | 0 | 0 | 0 | 0 | 0 | 0 | 0 | 0 | 0 | 0 |
| 65.4460 | -10.5580 | 3.2780 | H | 0 | 0 | 0 | 0 | 0 | 0 | 0 | 0 | 0 | 0 | 0 | 0 | 0 |
| 63.8660 | -9.3200  | 2.7430 | N | 0 | 0 | 3 | 0 | 0 | 0 | 0 | 0 | 0 | 0 | 0 | 0 | 0 |
| 64.0040 | -9.6550  | 1.7890 | H | 0 | 0 | 0 | 0 | 0 | 0 | 0 | 0 | 0 | 0 | 0 | 0 | 0 |
| 1       | 2        | 1      | 0 | 0 | 0 | 0 | 0 | 0 | 0 | 0 | 0 | 0 | 0 | 0 | 0 | 0 |
| 1       | 3        | 1      | 0 | 0 | 0 | 0 | 0 | 0 | 0 | 0 | 0 | 0 | 0 | 0 | 0 | 0 |
| 3       | 4        | 1      | 0 | 0 | 0 | 0 | 0 | 0 | 0 | 0 | 0 | 0 | 0 | 0 | 0 | 0 |
| 3       | 5        | 1      | 0 | 0 | 0 | 0 | 0 | 0 | 0 | 0 | 0 | 0 | 0 | 0 | 0 | 0 |
| 3       | 6        | 1      | 0 | 0 | 0 | 0 | 0 | 0 | 0 | 0 | 0 | 0 | 0 | 0 | 0 | 0 |
| 6       | 7        | 1      | 0 | 0 | 0 | 0 | 0 | 0 | 0 | 0 | 0 | 0 | 0 | 0 | 0 | 0 |
| 6       | 8        | 1      | 0 | 0 | 0 | 0 | 0 | 0 | 0 | 0 | 0 | 0 | 0 | 0 | 0 | 0 |
| 6       | 9        | 1      | 0 | 0 | 0 | 0 | 0 | 0 | 0 | 0 | 0 | 0 | 0 | 0 | 0 | 0 |
| 9       | 10       | 1      | 0 | 0 | 0 | 0 | 0 | 0 | 0 | 0 | 0 | 0 | 0 | 0 | 0 | 0 |
| 9       | 11       | 1      | 0 | 0 | 0 | 0 | 0 | 0 | 0 | 0 | 0 | 0 | 0 | 0 | 0 | 0 |
| 9       | 12       | 1      | 0 | 0 | 0 | 0 | 0 | 0 | 0 | 0 | 0 | 0 | 0 | 0 | 0 | 0 |
| 12      | 13       | 1      | 0 | 0 | 0 | 0 | 0 | 0 | 0 | 0 | 0 | 0 | 0 | 0 | 0 | 0 |
| 12      | 14       | 1      | 0 | 0 | 0 | 0 | 0 | 0 | 0 | 0 | 0 | 0 | 0 | 0 | 0 | 0 |
| 12      | 15       | 1      | 0 | 0 | 0 | 0 | 0 | 0 | 0 | 0 | 0 | 0 | 0 | 0 | 0 | 0 |
| 15      | 16       | 1      | 0 | 0 | 0 | 0 | 0 | 0 | 0 | 0 | 0 | 0 | 0 | 0 | 0 | 0 |
| 15      | 17       | 1      | 0 | 0 | 0 | 0 | 0 | 0 | 0 | 0 | 0 | 0 | 0 | 0 | 0 | 0 |
| 17      | 18       | 1      | 0 | 0 | 0 | 0 | 0 | 0 | 0 | 0 | 0 | 0 | 0 | 0 | 0 | 0 |
| 17      | 19       | 1      | 0 | 0 | 0 | 0 | 0 | 0 | 0 | 0 | 0 | 0 | 0 | 0 | 0 | 0 |
| 17      | 20       | 1      | 0 | 0 | 0 | 0 | 0 | 0 | 0 | 0 | 0 | 0 | 0 | 0 | 0 | 0 |
| 20      | 21       | 1      | 0 | 0 | 0 | 0 | 0 | 0 | 0 | 0 | 0 | 0 | 0 | 0 | 0 | 0 |
| 20      | 22       | 1      | 0 | 0 | 0 | 0 | 0 | 0 | 0 | 0 | 0 | 0 | 0 | 0 | 0 | 0 |
| 20      | 23       | 1      | 0 | 0 | 0 | 0 | 0 | 0 | 0 | 0 | 0 | 0 | 0 | 0 | 0 | 0 |
| 23      | 24       | 1      | 0 | 0 | 0 | 0 | 0 | 0 | 0 | 0 | 0 | 0 | 0 | 0 | 0 | 0 |
| 23      | 42       | 2      | 0 | 0 | 0 | 0 | 0 | 0 | 0 | 0 | 0 | 0 | 0 | 0 | 0 | 0 |
| 24      | 25       | 1      | 0 | 0 | 0 | 0 | 0 | 0 | 0 | 0 | 0 | 0 | 0 | 0 | 0 | 0 |
| 25      | 26       | 1      | 0 | 0 | 0 | 0 | 0 | 0 | 0 | 0 | 0 | 0 | 0 | 0 | 0 | 0 |
| 25      | 27       | 1      | 0 | 0 | 0 | 0 | 0 | 0 | 0 | 0 | 0 | 0 | 0 | 0 | 0 | 0 |
| 25      | 28       | 1      | 0 | 0 | 0 | 0 | 0 | 0 | 0 | 0 | 0 | 0 | 0 | 0 | 0 | 0 |
| 28      | 29       | 1      | 0 | 0 | 0 | 0 | 0 | 0 | 0 | 0 | 0 | 0 | 0 | 0 | 0 | 0 |
| 28      | 30       | 1      | 0 | 0 | 0 | 0 | 0 | 0 | 0 | 0 | 0 | 0 | 0 | 0 | 0 | 0 |
| 28      | 31       | 1      | 0 | 0 | 0 | 0 | 0 | 0 | 0 | 0 | 0 | 0 | 0 | 0 | 0 | 0 |
| 31      | 32       | 1      | 0 | 0 | 0 | 0 | 0 | 0 | 0 | 0 | 0 | 0 | 0 | 0 | 0 | 0 |
| 31      | 33       | 1      | 0 | 0 | 0 | 0 | 0 | 0 | 0 | 0 | 0 | 0 | 0 | 0 | 0 | 0 |
| 31      | 34       | 1      | 0 | 0 | 0 | 0 | 0 | 0 | 0 | 0 | 0 | 0 | 0 | 0 | 0 | 0 |
| 34      | 35       | 1      | 0 | 0 | 0 | 0 | 0 | 0 | 0 | 0 | 0 | 0 | 0 | 0 | 0 | 0 |
| 35      | 36       | 1      | 0 | 0 | 0 | 0 | 0 | 0 | 0 | 0 | 0 | 0 | 0 | 0 | 0 | 0 |
| 35      | 43       | 2      | 0 | 0 | 0 | 0 | 0 | 0 | 0 | 0 | 0 | 0 | 0 | 0 | 0 | 0 |
| 36      | 37       | 1      | 0 | 0 | 0 | 0 | 0 | 0 | 0 | 0 | 0 | 0 | 0 | 0 | 0 | 0 |
| 36      | 38       | 1      | 0 | 0 | 0 | 0 | 0 | 0 | 0 | 0 | 0 | 0 | 0 | 0 | 0 | 0 |
| 36      | 39       | 1      | 0 | 0 | 0 | 0 | 0 | 0 | 0 | 0 | 0 | 0 | 0 | 0 | 0 | 0 |
| 39      | 40       | 1      | 0 | 0 | 0 | 0 | 0 | 0 | 0 | 0 | 0 | 0 | 0 | 0 | 0 | 0 |
| 39      | 41       | 1      | 0 | 0 | 0 | 0 | 0 | 0 | 0 | 0 | 0 | 0 | 0 | 0 | 0 | 0 |
| 39      | 58       | 1      | 0 | 0 | 0 | 0 | 0 | 0 | 0 | 0 | 0 | 0 | 0 | 0 | 0 | 0 |
| 44      | 45       | 1      | 0 | 0 | 0 | 0 | 0 | 0 | 0 | 0 | 0 | 0 | 0 | 0 | 0 | 0 |
| 44      | 46       | 1      | 0 | 0 | 0 | 0 | 0 | 0 | 0 | 0 | 0 | 0 | 0 | 0 | 0 | 0 |
| 46      | 47       | 1      | 0 | 0 | 0 | 0 | 0 | 0 | 0 | 0 | 0 | 0 | 0 | 0 | 0 | 0 |
| 46      | 48       | 1      | 0 | 0 | 0 | 0 | 0 | 0 | 0 | 0 | 0 | 0 | 0 | 0 | 0 | 0 |
| 46      | 49       | 1      | 0 | 0 | 0 | 0 | 0 | 0 | 0 | 0 | 0 | 0 | 0 | 0 | 0 | 0 |
| 49      | 50       | 1      | 0 | 0 | 0 | 0 | 0 | 0 | 0 | 0 | 0 | 0 | 0 | 0 | 0 | 0 |
| 49      | 51       | 1      | 0 | 0 | 0 | 0 | 0 | 0 | 0 | 0 | 0 | 0 | 0 | 0 | 0 | 0 |
| 49      | 52       | 1      | 0 | 0 | 0 | 0 | 0 | 0 | 0 | 0 | 0 | 0 | 0 | 0 | 0 | 0 |
| 52      | 53       | 1      | 0 | 0 | 0 | 0 | 0 | 0 | 0 | 0 | 0 | 0 | 0 | 0 | 0 | 0 |
| 52      | 54       | 1      | 0 | 0 | 0 | 0 | 0 | 0 | 0 | 0 | 0 | 0 | 0 | 0 | 0 | 0 |
| 52      | 55       | 1      | 0 | 0 | 0 | 0 | 0 | 0 | 0 | 0 | 0 | 0 | 0 | 0 | 0 | 0 |
| 55      | 56       | 1      | 0 | 0 | 0 | 0 | 0 | 0 | 0 | 0 | 0 | 0 | 0 | 0 | 0 | 0 |
| 55      | 57       | 1      | 0 | 0 | 0 | 0 | 0 | 0 | 0 | 0 | 0 | 0 | 0 | 0 | 0 | 0 |
| 55      | 58       | 1      | 0 | 0 | 0 | 0 | 0 | 0 | 0 | 0 | 0 | 0 | 0 | 0 | 0 | 0 |
| 58      | 59       | 1      | 0 | 0 | 0 | 0 | 0 | 0 | 0 | 0 | 0 | 0 | 0 | 0 | 0 | 0 |
| 59      | 60       | 1      | 0 | 0 | 0 | 0 | 0 | 0 | 0 | 0 | 0 | 0 | 0 | 0 | 0 | 0 |
| 59      | 61       | 1      | 0 | 0 | 0 | 0 | 0 | 0 | 0 | 0 | 0 | 0 | 0 | 0 | 0 | 0 |
| 59      | 62       | 1      | 0 | 0 | 0 | 0 | 0 | 0 | 0 | 0 | 0 | 0 | 0 | 0 | 0 | 0 |
| 62      | 63       | 1      | 0 | 0 | 0 | 0 | 0 | 0 | 0 | 0 | 0 | 0 | 0 | 0 | 0 | 0 |



|     |     |   |   |   |   |   |
|-----|-----|---|---|---|---|---|
| 62  | 64  | 1 | 0 | 0 | 0 | 0 |
| 62  | 65  | 1 | 0 | 0 | 0 | 0 |
| 65  | 66  | 1 | 0 | 0 | 0 | 0 |
| 65  | 84  | 2 | 0 | 0 | 0 | 0 |
| 66  | 67  | 1 | 0 | 0 | 0 | 0 |
| 67  | 68  | 1 | 0 | 0 | 0 | 0 |
| 67  | 69  | 1 | 0 | 0 | 0 | 0 |
| 67  | 70  | 1 | 0 | 0 | 0 | 0 |
| 70  | 71  | 1 | 0 | 0 | 0 | 0 |
| 70  | 72  | 1 | 0 | 0 | 0 | 0 |
| 70  | 73  | 1 | 0 | 0 | 0 | 0 |
| 73  | 74  | 1 | 0 | 0 | 0 | 0 |
| 73  | 75  | 1 | 0 | 0 | 0 | 0 |
| 73  | 76  | 1 | 0 | 0 | 0 | 0 |
| 76  | 77  | 1 | 0 | 0 | 0 | 0 |
| 77  | 78  | 1 | 0 | 0 | 0 | 0 |
| 77  | 85  | 2 | 0 | 0 | 0 | 0 |
| 78  | 79  | 1 | 0 | 0 | 0 | 0 |
| 78  | 80  | 1 | 0 | 0 | 0 | 0 |
| 78  | 81  | 1 | 0 | 0 | 0 | 0 |
| 81  | 82  | 1 | 0 | 0 | 0 | 0 |
| 81  | 83  | 1 | 0 | 0 | 0 | 0 |
| 81  | 100 | 1 | 0 | 0 | 0 | 0 |
| 86  | 87  | 1 | 0 | 0 | 0 | 0 |
| 86  | 88  | 1 | 0 | 0 | 0 | 0 |
| 88  | 89  | 1 | 0 | 0 | 0 | 0 |
| 88  | 90  | 1 | 0 | 0 | 0 | 0 |
| 88  | 91  | 1 | 0 | 0 | 0 | 0 |
| 91  | 92  | 1 | 0 | 0 | 0 | 0 |
| 91  | 93  | 1 | 0 | 0 | 0 | 0 |
| 91  | 94  | 1 | 0 | 0 | 0 | 0 |
| 94  | 95  | 1 | 0 | 0 | 0 | 0 |
| 94  | 96  | 1 | 0 | 0 | 0 | 0 |
| 94  | 97  | 1 | 0 | 0 | 0 | 0 |
| 97  | 98  | 1 | 0 | 0 | 0 | 0 |
| 97  | 99  | 1 | 0 | 0 | 0 | 0 |
| 97  | 100 | 1 | 0 | 0 | 0 | 0 |
| 100 | 101 | 1 | 0 | 0 | 0 | 0 |
| 101 | 102 | 1 | 0 | 0 | 0 | 0 |
| 101 | 103 | 1 | 0 | 0 | 0 | 0 |
| 101 | 104 | 1 | 0 | 0 | 0 | 0 |
| 104 | 105 | 1 | 0 | 0 | 0 | 0 |
| 104 | 106 | 1 | 0 | 0 | 0 | 0 |
| 104 | 107 | 1 | 0 | 0 | 0 | 0 |
| 107 | 108 | 1 | 0 | 0 | 0 | 0 |
| 107 | 126 | 2 | 0 | 0 | 0 | 0 |
| 108 | 109 | 1 | 0 | 0 | 0 | 0 |
| 109 | 110 | 1 | 0 | 0 | 0 | 0 |
| 109 | 111 | 1 | 0 | 0 | 0 | 0 |
| 109 | 112 | 1 | 0 | 0 | 0 | 0 |
| 112 | 113 | 1 | 0 | 0 | 0 | 0 |
| 112 | 114 | 1 | 0 | 0 | 0 | 0 |
| 112 | 115 | 1 | 0 | 0 | 0 | 0 |
| 115 | 116 | 1 | 0 | 0 | 0 | 0 |
| 115 | 117 | 1 | 0 | 0 | 0 | 0 |
| 115 | 118 | 1 | 0 | 0 | 0 | 0 |
| 118 | 119 | 1 | 0 | 0 | 0 | 0 |
| 119 | 120 | 1 | 0 | 0 | 0 | 0 |
| 119 | 127 | 2 | 0 | 0 | 0 | 0 |
| 120 | 121 | 1 | 0 | 0 | 0 | 0 |
| 120 | 122 | 1 | 0 | 0 | 0 | 0 |
| 120 | 123 | 1 | 0 | 0 | 0 | 0 |
| 123 | 124 | 1 | 0 | 0 | 0 | 0 |
| 123 | 125 | 1 | 0 | 0 | 0 | 0 |
| 123 | 142 | 1 | 0 | 0 | 0 | 0 |
| 128 | 129 | 1 | 0 | 0 | 0 | 0 |
| 128 | 130 | 1 | 0 | 0 | 0 | 0 |
| 130 | 131 | 1 | 0 | 0 | 0 | 0 |
| 130 | 132 | 1 | 0 | 0 | 0 | 0 |
| 130 | 133 | 1 | 0 | 0 | 0 | 0 |
| 133 | 134 | 1 | 0 | 0 | 0 | 0 |
| 133 | 135 | 1 | 0 | 0 | 0 | 0 |
| 133 | 136 | 1 | 0 | 0 | 0 | 0 |
| 136 | 137 | 1 | 0 | 0 | 0 | 0 |
| 136 | 138 | 1 | 0 | 0 | 0 | 0 |
| 136 | 139 | 1 | 0 | 0 | 0 | 0 |
| 139 | 140 | 1 | 0 | 0 | 0 | 0 |
| 139 | 141 | 1 | 0 | 0 | 0 | 0 |
| 139 | 142 | 1 | 0 | 0 | 0 | 0 |
| 142 | 143 | 1 | 0 | 0 | 0 | 0 |
| 143 | 144 | 1 | 0 | 0 | 0 | 0 |

|        |   |   |   |   |   |
|--------|---|---|---|---|---|
| 143145 | 1 | 0 | 0 | 0 | 0 |
| 143146 | 1 | 0 | 0 | 0 | 0 |
| 146147 | 1 | 0 | 0 | 0 | 0 |
| 146148 | 1 | 0 | 0 | 0 | 0 |
| 146149 | 1 | 0 | 0 | 0 | 0 |
| 149150 | 1 | 0 | 0 | 0 | 0 |
| 149168 | 2 | 0 | 0 | 0 | 0 |
| 150151 | 1 | 0 | 0 | 0 | 0 |
| 151152 | 1 | 0 | 0 | 0 | 0 |
| 151153 | 1 | 0 | 0 | 0 | 0 |
| 151154 | 1 | 0 | 0 | 0 | 0 |
| 154155 | 1 | 0 | 0 | 0 | 0 |
| 154156 | 1 | 0 | 0 | 0 | 0 |
| 154157 | 1 | 0 | 0 | 0 | 0 |
| 157158 | 1 | 0 | 0 | 0 | 0 |
| 157159 | 1 | 0 | 0 | 0 | 0 |
| 157160 | 1 | 0 | 0 | 0 | 0 |
| 160161 | 1 | 0 | 0 | 0 | 0 |
| 161162 | 1 | 0 | 0 | 0 | 0 |
| 161169 | 2 | 0 | 0 | 0 | 0 |
| 162163 | 1 | 0 | 0 | 0 | 0 |
| 162164 | 1 | 0 | 0 | 0 | 0 |
| 162165 | 1 | 0 | 0 | 0 | 0 |
| 165166 | 1 | 0 | 0 | 0 | 0 |
| 165167 | 1 | 0 | 0 | 0 | 0 |
| 165184 | 1 | 0 | 0 | 0 | 0 |
| 170171 | 1 | 0 | 0 | 0 | 0 |
| 170172 | 1 | 0 | 0 | 0 | 0 |
| 172173 | 1 | 0 | 0 | 0 | 0 |
| 172174 | 1 | 0 | 0 | 0 | 0 |
| 172175 | 1 | 0 | 0 | 0 | 0 |
| 175176 | 1 | 0 | 0 | 0 | 0 |
| 175177 | 1 | 0 | 0 | 0 | 0 |
| 175178 | 1 | 0 | 0 | 0 | 0 |
| 178179 | 1 | 0 | 0 | 0 | 0 |
| 178180 | 1 | 0 | 0 | 0 | 0 |
| 178181 | 1 | 0 | 0 | 0 | 0 |
| 181182 | 1 | 0 | 0 | 0 | 0 |
| 181183 | 1 | 0 | 0 | 0 | 0 |
| 181184 | 1 | 0 | 0 | 0 | 0 |
| 184185 | 1 | 0 | 0 | 0 | 0 |
| 185186 | 1 | 0 | 0 | 0 | 0 |
| 185187 | 1 | 0 | 0 | 0 | 0 |
| 185188 | 1 | 0 | 0 | 0 | 0 |
| 188189 | 1 | 0 | 0 | 0 | 0 |
| 188190 | 1 | 0 | 0 | 0 | 0 |
| 188191 | 1 | 0 | 0 | 0 | 0 |
| 191192 | 1 | 0 | 0 | 0 | 0 |
| 191210 | 2 | 0 | 0 | 0 | 0 |
| 192193 | 1 | 0 | 0 | 0 | 0 |
| 193194 | 1 | 0 | 0 | 0 | 0 |
| 193195 | 1 | 0 | 0 | 0 | 0 |
| 193196 | 1 | 0 | 0 | 0 | 0 |
| 196197 | 1 | 0 | 0 | 0 | 0 |
| 196198 | 1 | 0 | 0 | 0 | 0 |
| 196199 | 1 | 0 | 0 | 0 | 0 |
| 199200 | 1 | 0 | 0 | 0 | 0 |
| 199201 | 1 | 0 | 0 | 0 | 0 |
| 199202 | 1 | 0 | 0 | 0 | 0 |
| 202203 | 1 | 0 | 0 | 0 | 0 |
| 203204 | 1 | 0 | 0 | 0 | 0 |
| 203211 | 2 | 0 | 0 | 0 | 0 |
| 204205 | 1 | 0 | 0 | 0 | 0 |
| 204206 | 1 | 0 | 0 | 0 | 0 |
| 204207 | 1 | 0 | 0 | 0 | 0 |
| 207208 | 1 | 0 | 0 | 0 | 0 |
| 207209 | 1 | 0 | 0 | 0 | 0 |
| 207226 | 1 | 0 | 0 | 0 | 0 |
| 212213 | 1 | 0 | 0 | 0 | 0 |
| 212214 | 1 | 0 | 0 | 0 | 0 |
| 214215 | 1 | 0 | 0 | 0 | 0 |
| 214216 | 1 | 0 | 0 | 0 | 0 |
| 214217 | 1 | 0 | 0 | 0 | 0 |
| 217218 | 1 | 0 | 0 | 0 | 0 |
| 217219 | 1 | 0 | 0 | 0 | 0 |
| 217220 | 1 | 0 | 0 | 0 | 0 |
| 220221 | 1 | 0 | 0 | 0 | 0 |
| 220222 | 1 | 0 | 0 | 0 | 0 |
| 220223 | 1 | 0 | 0 | 0 | 0 |
| 223224 | 1 | 0 | 0 | 0 | 0 |
| 223225 | 1 | 0 | 0 | 0 | 0 |







|         |         |         |   |   |   |   |   |   |   |   |   |   |   |   |   |
|---------|---------|---------|---|---|---|---|---|---|---|---|---|---|---|---|---|
| 41.2670 | 33.7430 | 0.1260  | H | 0 | 0 | 0 | 0 | 0 | 0 | 0 | 0 | 0 | 0 | 0 | 0 |
| 41.5100 | 32.6430 | 1.4660  | H | 0 | 0 | 0 | 0 | 0 | 0 | 0 | 0 | 0 | 0 | 0 | 0 |
| 39.7590 | 32.1940 | 0.2700  | C | 0 | 0 | 0 | 0 | 0 | 0 | 0 | 0 | 0 | 0 | 0 | 0 |
| 39.2370 | 31.6370 | 1.0580  | H | 0 | 0 | 0 | 0 | 0 | 0 | 0 | 0 | 0 | 0 | 0 | 0 |
| 38.9970 | 32.7440 | -0.2960 | H | 0 | 0 | 0 | 0 | 0 | 0 | 0 | 0 | 0 | 0 | 0 | 0 |
| 40.4810 | 31.2160 | -0.6580 | C | 0 | 0 | 0 | 0 | 0 | 0 | 0 | 0 | 0 | 0 | 0 | 0 |
| 41.0050 | 31.7760 | -1.4420 | H | 0 | 0 | 0 | 0 | 0 | 0 | 0 | 0 | 0 | 0 | 0 | 0 |
| 41.2430 | 30.6670 | -0.0890 | H | 0 | 0 | 0 | 0 | 0 | 0 | 0 | 0 | 0 | 0 | 0 | 0 |
| 39.5000 | 30.2280 | -1.2930 | C | 0 | 0 | 0 | 0 | 0 | 0 | 0 | 0 | 0 | 0 | 0 | 0 |
| 38.9810 | 29.6730 | -0.5030 | H | 0 | 0 | 0 | 0 | 0 | 0 | 0 | 0 | 0 | 0 | 0 | 0 |
| 38.7490 | 30.7790 | -1.8720 | H | 0 | 0 | 0 | 0 | 0 | 0 | 0 | 0 | 0 | 0 | 0 | 0 |
| 40.2280 | 29.3000 | -2.1600 | N | 0 | 0 | 3 | 0 | 0 | 0 | 0 | 0 | 0 | 0 | 0 | 0 |
| 40.7290 | 29.8250 | -2.8770 | H | 0 | 0 | 0 | 0 | 0 | 0 | 0 | 0 | 0 | 0 | 0 | 0 |
| 1       | 2       | 1       | 0 | 0 | 0 | 0 |   |   |   |   |   |   |   |   |   |
| 1       | 3       | 1       | 0 | 0 | 0 | 0 |   |   |   |   |   |   |   |   |   |
| 3       | 4       | 1       | 0 | 0 | 0 | 0 |   |   |   |   |   |   |   |   |   |
| 3       | 5       | 1       | 0 | 0 | 0 | 0 |   |   |   |   |   |   |   |   |   |
| 3       | 6       | 1       | 0 | 0 | 0 | 0 |   |   |   |   |   |   |   |   |   |
| 6       | 7       | 1       | 0 | 0 | 0 | 0 |   |   |   |   |   |   |   |   |   |
| 6       | 8       | 1       | 0 | 0 | 0 | 0 |   |   |   |   |   |   |   |   |   |
| 6       | 9       | 1       | 0 | 0 | 0 | 0 |   |   |   |   |   |   |   |   |   |
| 9       | 10      | 1       | 0 | 0 | 0 | 0 |   |   |   |   |   |   |   |   |   |
| 9       | 11      | 1       | 0 | 0 | 0 | 0 |   |   |   |   |   |   |   |   |   |
| 9       | 12      | 1       | 0 | 0 | 0 | 0 |   |   |   |   |   |   |   |   |   |
| 12      | 13      | 1       | 0 | 0 | 0 | 0 |   |   |   |   |   |   |   |   |   |
| 12      | 14      | 1       | 0 | 0 | 0 | 0 |   |   |   |   |   |   |   |   |   |
| 12      | 15      | 1       | 0 | 0 | 0 | 0 |   |   |   |   |   |   |   |   |   |
| 15      | 16      | 1       | 0 | 0 | 0 | 0 |   |   |   |   |   |   |   |   |   |
| 15      | 17      | 1       | 0 | 0 | 0 | 0 |   |   |   |   |   |   |   |   |   |
| 15      | 18      | 1       | 0 | 0 | 0 | 0 |   |   |   |   |   |   |   |   |   |
| 18      | 19      | 1       | 0 | 0 | 0 | 0 |   |   |   |   |   |   |   |   |   |
| 18      | 20      | 1       | 0 | 0 | 0 | 0 |   |   |   |   |   |   |   |   |   |
| 20      | 21      | 1       | 0 | 0 | 0 | 0 |   |   |   |   |   |   |   |   |   |
| 20      | 22      | 1       | 0 | 0 | 0 | 0 |   |   |   |   |   |   |   |   |   |
| 20      | 23      | 1       | 0 | 0 | 0 | 0 |   |   |   |   |   |   |   |   |   |
| 23      | 24      | 1       | 0 | 0 | 0 | 0 |   |   |   |   |   |   |   |   |   |
| 23      | 25      | 1       | 0 | 0 | 0 | 0 |   |   |   |   |   |   |   |   |   |
| 23      | 26      | 1       | 0 | 0 | 0 | 0 |   |   |   |   |   |   |   |   |   |
| 26      | 27      | 1       | 0 | 0 | 0 | 0 |   |   |   |   |   |   |   |   |   |
| 26      | 45      | 2       | 0 | 0 | 0 | 0 |   |   |   |   |   |   |   |   |   |
| 27      | 28      | 1       | 0 | 0 | 0 | 0 |   |   |   |   |   |   |   |   |   |
| 28      | 29      | 1       | 0 | 0 | 0 | 0 |   |   |   |   |   |   |   |   |   |
| 28      | 30      | 1       | 0 | 0 | 0 | 0 |   |   |   |   |   |   |   |   |   |
| 28      | 31      | 1       | 0 | 0 | 0 | 0 |   |   |   |   |   |   |   |   |   |
| 31      | 32      | 1       | 0 | 0 | 0 | 0 |   |   |   |   |   |   |   |   |   |
| 31      | 33      | 1       | 0 | 0 | 0 | 0 |   |   |   |   |   |   |   |   |   |
| 31      | 34      | 1       | 0 | 0 | 0 | 0 |   |   |   |   |   |   |   |   |   |
| 34      | 35      | 1       | 0 | 0 | 0 | 0 |   |   |   |   |   |   |   |   |   |
| 34      | 36      | 1       | 0 | 0 | 0 | 0 |   |   |   |   |   |   |   |   |   |
| 34      | 37      | 1       | 0 | 0 | 0 | 0 |   |   |   |   |   |   |   |   |   |
| 37      | 38      | 1       | 0 | 0 | 0 | 0 |   |   |   |   |   |   |   |   |   |
| 38      | 39      | 1       | 0 | 0 | 0 | 0 |   |   |   |   |   |   |   |   |   |
| 38      | 46      | 2       | 0 | 0 | 0 | 0 |   |   |   |   |   |   |   |   |   |
| 39      | 40      | 1       | 0 | 0 | 0 | 0 |   |   |   |   |   |   |   |   |   |
| 39      | 41      | 1       | 0 | 0 | 0 | 0 |   |   |   |   |   |   |   |   |   |
| 39      | 42      | 1       | 0 | 0 | 0 | 0 |   |   |   |   |   |   |   |   |   |
| 42      | 43      | 1       | 0 | 0 | 0 | 0 |   |   |   |   |   |   |   |   |   |
| 42      | 44      | 1       | 0 | 0 | 0 | 0 |   |   |   |   |   |   |   |   |   |
| 42      | 64      | 1       | 0 | 0 | 0 | 0 |   |   |   |   |   |   |   |   |   |
| 47      | 48      | 1       | 0 | 0 | 0 | 0 |   |   |   |   |   |   |   |   |   |
| 47      | 49      | 1       | 0 | 0 | 0 | 0 |   |   |   |   |   |   |   |   |   |
| 49      | 50      | 1       | 0 | 0 | 0 | 0 |   |   |   |   |   |   |   |   |   |
| 49      | 51      | 1       | 0 | 0 | 0 | 0 |   |   |   |   |   |   |   |   |   |
| 49      | 52      | 1       | 0 | 0 | 0 | 0 |   |   |   |   |   |   |   |   |   |
| 52      | 53      | 1       | 0 | 0 | 0 | 0 |   |   |   |   |   |   |   |   |   |
| 52      | 54      | 1       | 0 | 0 | 0 | 0 |   |   |   |   |   |   |   |   |   |
| 52      | 55      | 1       | 0 | 0 | 0 | 0 |   |   |   |   |   |   |   |   |   |
| 55      | 56      | 1       | 0 | 0 | 0 | 0 |   |   |   |   |   |   |   |   |   |
| 55      | 57      | 1       | 0 | 0 | 0 | 0 |   |   |   |   |   |   |   |   |   |
| 55      | 58      | 1       | 0 | 0 | 0 | 0 |   |   |   |   |   |   |   |   |   |
| 58      | 59      | 1       | 0 | 0 | 0 | 0 |   |   |   |   |   |   |   |   |   |
| 58      | 60      | 1       | 0 | 0 | 0 | 0 |   |   |   |   |   |   |   |   |   |
| 58      | 61      | 1       | 0 | 0 | 0 | 0 |   |   |   |   |   |   |   |   |   |
| 61      | 62      | 1       | 0 | 0 | 0 | 0 |   |   |   |   |   |   |   |   |   |
| 61      | 63      | 1       | 0 | 0 | 0 | 0 |   |   |   |   |   |   |   |   |   |
| 61      | 64      | 1       | 0 | 0 | 0 | 0 |   |   |   |   |   |   |   |   |   |
| 64      | 65      | 1       | 0 | 0 | 0 | 0 |   |   |   |   |   |   |   |   |   |
| 65      | 66      | 1       | 0 | 0 | 0 | 0 |   |   |   |   |   |   |   |   |   |
| 65      | 67      | 1       | 0 | 0 | 0 | 0 |   |   |   |   |   |   |   |   |   |
| 65      | 68      | 1       | 0 | 0 | 0 | 0 |   |   |   |   |   |   |   |   |   |
| 68      | 69      | 1       | 0 | 0 | 0 | 0 |   |   |   |   |   |   |   |   |   |

|     |     |   |   |   |   |   |
|-----|-----|---|---|---|---|---|
| 68  | 70  | 1 | 0 | 0 | 0 | 0 |
| 68  | 71  | 1 | 0 | 0 | 0 | 0 |
| 71  | 72  | 1 | 0 | 0 | 0 | 0 |
| 71  | 90  | 2 | 0 | 0 | 0 | 0 |
| 72  | 73  | 1 | 0 | 0 | 0 | 0 |
| 73  | 74  | 1 | 0 | 0 | 0 | 0 |
| 73  | 75  | 1 | 0 | 0 | 0 | 0 |
| 73  | 76  | 1 | 0 | 0 | 0 | 0 |
| 76  | 77  | 1 | 0 | 0 | 0 | 0 |
| 76  | 78  | 1 | 0 | 0 | 0 | 0 |
| 76  | 79  | 1 | 0 | 0 | 0 | 0 |
| 79  | 80  | 1 | 0 | 0 | 0 | 0 |
| 79  | 81  | 1 | 0 | 0 | 0 | 0 |
| 79  | 82  | 1 | 0 | 0 | 0 | 0 |
| 82  | 83  | 1 | 0 | 0 | 0 | 0 |
| 83  | 84  | 1 | 0 | 0 | 0 | 0 |
| 83  | 91  | 2 | 0 | 0 | 0 | 0 |
| 84  | 85  | 1 | 0 | 0 | 0 | 0 |
| 84  | 86  | 1 | 0 | 0 | 0 | 0 |
| 84  | 87  | 1 | 0 | 0 | 0 | 0 |
| 87  | 88  | 1 | 0 | 0 | 0 | 0 |
| 87  | 89  | 1 | 0 | 0 | 0 | 0 |
| 87  | 109 | 1 | 0 | 0 | 0 | 0 |
| 92  | 93  | 1 | 0 | 0 | 0 | 0 |
| 92  | 94  | 1 | 0 | 0 | 0 | 0 |
| 94  | 95  | 1 | 0 | 0 | 0 | 0 |
| 94  | 96  | 1 | 0 | 0 | 0 | 0 |
| 94  | 97  | 1 | 0 | 0 | 0 | 0 |
| 97  | 98  | 1 | 0 | 0 | 0 | 0 |
| 97  | 99  | 1 | 0 | 0 | 0 | 0 |
| 97  | 100 | 1 | 0 | 0 | 0 | 0 |
| 100 | 101 | 1 | 0 | 0 | 0 | 0 |
| 100 | 102 | 1 | 0 | 0 | 0 | 0 |
| 100 | 103 | 1 | 0 | 0 | 0 | 0 |
| 103 | 104 | 1 | 0 | 0 | 0 | 0 |
| 103 | 105 | 1 | 0 | 0 | 0 | 0 |
| 103 | 106 | 1 | 0 | 0 | 0 | 0 |
| 106 | 107 | 1 | 0 | 0 | 0 | 0 |
| 106 | 108 | 1 | 0 | 0 | 0 | 0 |
| 106 | 109 | 1 | 0 | 0 | 0 | 0 |
| 109 | 110 | 1 | 0 | 0 | 0 | 0 |
| 110 | 111 | 1 | 0 | 0 | 0 | 0 |
| 110 | 112 | 1 | 0 | 0 | 0 | 0 |
| 110 | 113 | 1 | 0 | 0 | 0 | 0 |
| 113 | 114 | 1 | 0 | 0 | 0 | 0 |
| 113 | 115 | 1 | 0 | 0 | 0 | 0 |
| 113 | 116 | 1 | 0 | 0 | 0 | 0 |
| 116 | 117 | 1 | 0 | 0 | 0 | 0 |
| 116 | 135 | 2 | 0 | 0 | 0 | 0 |
| 117 | 118 | 1 | 0 | 0 | 0 | 0 |
| 118 | 119 | 1 | 0 | 0 | 0 | 0 |
| 118 | 120 | 1 | 0 | 0 | 0 | 0 |
| 118 | 121 | 1 | 0 | 0 | 0 | 0 |
| 121 | 122 | 1 | 0 | 0 | 0 | 0 |
| 121 | 123 | 1 | 0 | 0 | 0 | 0 |
| 121 | 124 | 1 | 0 | 0 | 0 | 0 |
| 124 | 125 | 1 | 0 | 0 | 0 | 0 |
| 124 | 126 | 1 | 0 | 0 | 0 | 0 |
| 124 | 127 | 1 | 0 | 0 | 0 | 0 |
| 127 | 128 | 1 | 0 | 0 | 0 | 0 |
| 128 | 129 | 1 | 0 | 0 | 0 | 0 |
| 128 | 136 | 2 | 0 | 0 | 0 | 0 |
| 129 | 130 | 1 | 0 | 0 | 0 | 0 |
| 129 | 131 | 1 | 0 | 0 | 0 | 0 |
| 129 | 132 | 1 | 0 | 0 | 0 | 0 |
| 132 | 133 | 1 | 0 | 0 | 0 | 0 |
| 132 | 134 | 1 | 0 | 0 | 0 | 0 |
| 132 | 154 | 1 | 0 | 0 | 0 | 0 |
| 137 | 138 | 1 | 0 | 0 | 0 | 0 |
| 137 | 139 | 1 | 0 | 0 | 0 | 0 |
| 139 | 140 | 1 | 0 | 0 | 0 | 0 |
| 139 | 141 | 1 | 0 | 0 | 0 | 0 |
| 139 | 142 | 1 | 0 | 0 | 0 | 0 |
| 142 | 143 | 1 | 0 | 0 | 0 | 0 |
| 142 | 144 | 1 | 0 | 0 | 0 | 0 |
| 142 | 145 | 1 | 0 | 0 | 0 | 0 |
| 145 | 146 | 1 | 0 | 0 | 0 | 0 |
| 145 | 147 | 1 | 0 | 0 | 0 | 0 |
| 145 | 148 | 1 | 0 | 0 | 0 | 0 |
| 148 | 149 | 1 | 0 | 0 | 0 | 0 |
| 148 | 150 | 1 | 0 | 0 | 0 | 0 |

|        |   |   |   |   |   |
|--------|---|---|---|---|---|
| 148151 | 1 | 0 | 0 | 0 | 0 |
| 151152 | 1 | 0 | 0 | 0 | 0 |
| 151153 | 1 | 0 | 0 | 0 | 0 |
| 151154 | 1 | 0 | 0 | 0 | 0 |
| 154155 | 1 | 0 | 0 | 0 | 0 |
| 155156 | 1 | 0 | 0 | 0 | 0 |
| 155157 | 1 | 0 | 0 | 0 | 0 |
| 155158 | 1 | 0 | 0 | 0 | 0 |
| 158159 | 1 | 0 | 0 | 0 | 0 |
| 158160 | 1 | 0 | 0 | 0 | 0 |
| 158161 | 1 | 0 | 0 | 0 | 0 |
| 161162 | 1 | 0 | 0 | 0 | 0 |
| 161180 | 2 | 0 | 0 | 0 | 0 |
| 162163 | 1 | 0 | 0 | 0 | 0 |
| 163164 | 1 | 0 | 0 | 0 | 0 |
| 163165 | 1 | 0 | 0 | 0 | 0 |
| 163166 | 1 | 0 | 0 | 0 | 0 |
| 166167 | 1 | 0 | 0 | 0 | 0 |
| 166168 | 1 | 0 | 0 | 0 | 0 |
| 166169 | 1 | 0 | 0 | 0 | 0 |
| 169170 | 1 | 0 | 0 | 0 | 0 |
| 169171 | 1 | 0 | 0 | 0 | 0 |
| 169172 | 1 | 0 | 0 | 0 | 0 |
| 172173 | 1 | 0 | 0 | 0 | 0 |
| 173174 | 1 | 0 | 0 | 0 | 0 |
| 173181 | 2 | 0 | 0 | 0 | 0 |
| 174175 | 1 | 0 | 0 | 0 | 0 |
| 174176 | 1 | 0 | 0 | 0 | 0 |
| 174177 | 1 | 0 | 0 | 0 | 0 |
| 177178 | 1 | 0 | 0 | 0 | 0 |
| 177179 | 1 | 0 | 0 | 0 | 0 |
| 177199 | 1 | 0 | 0 | 0 | 0 |
| 182183 | 1 | 0 | 0 | 0 | 0 |
| 182184 | 1 | 0 | 0 | 0 | 0 |
| 184185 | 1 | 0 | 0 | 0 | 0 |
| 184186 | 1 | 0 | 0 | 0 | 0 |
| 184187 | 1 | 0 | 0 | 0 | 0 |
| 187188 | 1 | 0 | 0 | 0 | 0 |
| 187189 | 1 | 0 | 0 | 0 | 0 |
| 187190 | 1 | 0 | 0 | 0 | 0 |
| 190191 | 1 | 0 | 0 | 0 | 0 |
| 190192 | 1 | 0 | 0 | 0 | 0 |
| 190193 | 1 | 0 | 0 | 0 | 0 |
| 193194 | 1 | 0 | 0 | 0 | 0 |
| 193195 | 1 | 0 | 0 | 0 | 0 |
| 193196 | 1 | 0 | 0 | 0 | 0 |
| 196197 | 1 | 0 | 0 | 0 | 0 |
| 196198 | 1 | 0 | 0 | 0 | 0 |
| 196199 | 1 | 0 | 0 | 0 | 0 |
| 199200 | 1 | 0 | 0 | 0 | 0 |
| 200201 | 1 | 0 | 0 | 0 | 0 |
| 200202 | 1 | 0 | 0 | 0 | 0 |
| 200203 | 1 | 0 | 0 | 0 | 0 |
| 203204 | 1 | 0 | 0 | 0 | 0 |
| 203205 | 1 | 0 | 0 | 0 | 0 |
| 203206 | 1 | 0 | 0 | 0 | 0 |
| 206207 | 1 | 0 | 0 | 0 | 0 |
| 206225 | 2 | 0 | 0 | 0 | 0 |
| 207208 | 1 | 0 | 0 | 0 | 0 |
| 208209 | 1 | 0 | 0 | 0 | 0 |
| 208210 | 1 | 0 | 0 | 0 | 0 |
| 208211 | 1 | 0 | 0 | 0 | 0 |
| 211212 | 1 | 0 | 0 | 0 | 0 |
| 211213 | 1 | 0 | 0 | 0 | 0 |
| 211214 | 1 | 0 | 0 | 0 | 0 |
| 214215 | 1 | 0 | 0 | 0 | 0 |
| 214216 | 1 | 0 | 0 | 0 | 0 |
| 214217 | 1 | 0 | 0 | 0 | 0 |
| 217218 | 1 | 0 | 0 | 0 | 0 |
| 218219 | 1 | 0 | 0 | 0 | 0 |
| 218226 | 2 | 0 | 0 | 0 | 0 |
| 219220 | 1 | 0 | 0 | 0 | 0 |
| 219221 | 1 | 0 | 0 | 0 | 0 |
| 219222 | 1 | 0 | 0 | 0 | 0 |
| 222223 | 1 | 0 | 0 | 0 | 0 |
| 222224 | 1 | 0 | 0 | 0 | 0 |
| 222244 | 1 | 0 | 0 | 0 | 0 |
| 227228 | 1 | 0 | 0 | 0 | 0 |
| 227229 | 1 | 0 | 0 | 0 | 0 |
| 229230 | 1 | 0 | 0 | 0 | 0 |
| 229231 | 1 | 0 | 0 | 0 | 0 |



229232 1 0 0 0 0  
232233 1 0 0 0 0  
232234 1 0 0 0 0  
232235 1 0 0 0 0  
235236 1 0 0 0 0  
235237 1 0 0 0 0  
235238 1 0 0 0 0  
238239 1 0 0 0 0  
238240 1 0 0 0 0  
238241 1 0 0 0 0  
241242 1 0 0 0 0  
241243 1 0 0 0 0  
241244 1 0 0 0 0  
244245 1 0 0 0 0

M END  
> <NAME>  
II32\_12

\$\$\$\$  
II36\_12  
MOE2012 3D

263262 0 0 1 0 0 0 0 0999 V2000  
14.6500 -21.4410 -18.3230 O 0 0 0 0 0 0 0 0 0 0 0 0 0 0 0 0  
14.1730 -21.9700 -17.6610 H 0 0 0 0 0 0 0 0 0 0 0 0 0 0 0 0  
15.4570 -20.5130 -17.6100 C 0 0 0 0 0 0 0 0 0 0 0 0 0 0 0 0  
14.8050 -19.8960 -16.9830 H 0 0 0 0 0 0 0 0 0 0 0 0 0 0 0 0  
16.1440 -21.0720 -16.9680 H 0 0 0 0 0 0 0 0 0 0 0 0 0 0 0 0  
16.2240 -19.6510 -18.6050 C 0 0 0 0 0 0 0 0 0 0 0 0 0 0 0 0  
16.8260 -20.2980 -19.2570 H 0 0 0 0 0 0 0 0 0 0 0 0 0 0 0 0  
15.5140 -19.1390 -19.2660 H 0 0 0 0 0 0 0 0 0 0 0 0 0 0 0 0  
17.1200 -18.6330 -17.9000 C 0 0 0 0 0 0 0 0 0 0 0 0 0 0 0 0  
16.5070 -17.9890 -17.2570 H 0 0 0 0 0 0 0 0 0 0 0 0 0 0 0 0  
17.8280 -19.1580 -17.2480 H 0 0 0 0 0 0 0 0 0 0 0 0 0 0 0 0  
17.8900 -17.7700 -18.9030 C 0 0 0 0 0 0 0 0 0 0 0 0 0 0 0 0  
18.4980 -18.4140 -19.5490 H 0 0 0 0 0 0 0 0 0 0 0 0 0 0 0 0  
17.1820 -17.2390 -19.5500 H 0 0 0 0 0 0 0 0 0 0 0 0 0 0 0 0  
18.7940 -16.7580 -18.1920 C 0 0 0 0 0 0 0 0 0 0 0 0 0 0 0 0  
18.1840 -16.1140 -17.5460 H 0 0 0 0 0 0 0 0 0 0 0 0 0 0 0 0  
19.4970 -17.2940 -17.5420 H 0 0 0 0 0 0 0 0 0 0 0 0 0 0 0 0  
19.5690 -15.8990 -19.1960 C 0 0 0 0 0 0 0 0 0 0 0 0 0 0 0 0  
20.1790 -16.5460 -19.8370 H 0 0 0 0 0 0 0 0 0 0 0 0 0 0 0 0  
18.8600 -15.3580 -19.8340 H 0 0 0 0 0 0 0 0 0 0 0 0 0 0 0 0  
20.4210 -14.9470 -18.4790 N 0 0 0 3 0 0 0 0 0 0 0 0 0 0 0 0  
21.0500 -15.4580 -17.8580 H 0 0 0 0 0 0 0 0 0 0 0 0 0 0 0 0  
21.1960 -14.1220 -19.4100 C 0 0 0 0 0 0 0 0 0 0 0 0 0 0 0 0  
21.8520 -14.7690 -20.0040 H 0 0 0 0 0 0 0 0 0 0 0 0 0 0 0 0  
20.5260 -13.6010 -20.1050 H 0 0 0 0 0 0 0 0 0 0 0 0 0 0 0 0  
22.0650 -13.1160 -18.6590 C 0 0 0 0 0 0 0 0 0 0 0 0 0 0 0 0  
22.5950 -13.6140 -17.8380 H 0 0 0 0 0 0 0 0 0 0 0 0 0 0 0 0  
22.8170 -12.7010 -19.3400 H 0 0 0 0 0 0 0 0 0 0 0 0 0 0 0 0  
21.2710 -11.9500 -18.1180 C 0 0 0 0 0 0 0 0 0 0 0 0 0 0 0 0  
21.9190 -11.4220 -17.0370 O 0 0 0 0 0 0 0 0 0 0 0 0 0 0 0 0  
21.2910 -10.2630 -16.4690 C 0 0 0 0 0 0 0 0 0 0 0 0 0 0 0 0  
21.1560 -9.5000 -17.2440 H 0 0 0 0 0 0 0 0 0 0 0 0 0 0 0 0  
20.3140 -10.5480 -16.0610 H 0 0 0 0 0 0 0 0 0 0 0 0 0 0 0 0  
22.1900 -9.7270 -15.3630 C 0 0 0 0 0 0 0 0 0 0 0 0 0 0 0 0  
22.3610 -10.5040 -14.6070 H 0 0 0 0 0 0 0 0 0 0 0 0 0 0 0 0  
23.1870 -9.5060 -15.7640 H 0 0 0 0 0 0 0 0 0 0 0 0 0 0 0 0  
21.6020 -8.4840 -14.7110 C 0 0 0 0 0 0 0 0 0 0 0 0 0 0 0 0  
21.4700 -7.6920 -15.4570 H 0 0 0 0 0 0 0 0 0 0 0 0 0 0 0 0  
20.6350 -8.7210 -14.2520 H 0 0 0 0 0 0 0 0 0 0 0 0 0 0 0 0  
22.5140 -8.0320 -13.6980 O 0 0 0 0 0 0 0 0 0 0 0 0 0 0 0 0  
22.0990 -6.9260 -13.0150 C 0 0 0 0 0 0 0 0 0 0 0 0 0 0 0 0  
23.1400 -6.5390 -11.9910 C 0 0 0 0 0 0 0 0 0 0 0 0 0 0 0 0  
23.4250 -7.4380 -11.4320 H 0 0 0 0 0 0 0 0 0 0 0 0 0 0 0 0  
24.0100 -6.1600 -12.5350 H 0 0 0 0 0 0 0 0 0 0 0 0 0 0 0 0  
22.5830 -5.4890 -11.0230 C 0 0 0 0 0 0 0 0 0 0 0 0 0 0 0 0  
22.3300 -4.5670 -11.5630 H 0 0 0 0 0 0 0 0 0 0 0 0 0 0 0 0  
21.6380 -5.8920 -10.6320 H 0 0 0 0 0 0 0 0 0 0 0 0 0 0 0 0  
20.2450 -11.5020 -18.6080 O 0 0 0 0 0 0 0 0 0 0 0 0 0 0 0 0  
21.0520 -6.3260 -13.2170 O 0 0 0 0 0 0 0 0 0 0 0 0 0 0 0 0  
21.5100 -4.0280 -1.4700 O 0 0 0 0 0 0 0 0 0 0 0 0 0 0 0 0  
21.9630 -3.1720 -1.5950 H 0 0 0 0 0 0 0 0 0 0 0 0 0 0 0 0  
21.9880 -4.8760 -2.5150 C 0 0 0 0 0 0 0 0 0 0 0 0 0 0 0 0  
23.0420 -5.0960 -2.3170 H 0 0 0 0 0 0 0 0 0 0 0 0 0 0 0 0  
21.4250 -5.8140 -2.4740 H 0 0 0 0 0 0 0 0 0 0 0 0 0 0 0 0  
21.8110 -4.1900 -3.8660 C 0 0 0 0 0 0 0 0 0 0 0 0 0 0 0 0  
20.7460 -3.9880 -4.0330 H 0 0 0 0 0 0 0 0 0 0 0 0 0 0 0 0  
22.3020 -3.2090 -3.8440 H 0 0 0 0 0 0 0 0 0 0 0 0 0 0 0 0  
22.3800 -5.0310 -5.0070 C 0 0 0 0 0 0 0 0 0 0 0 0 0 0 0 0







|     |     |   |   |   |   |   |
|-----|-----|---|---|---|---|---|
| 37  | 39  | 1 | 0 | 0 | 0 | 0 |
| 37  | 40  | 1 | 0 | 0 | 0 | 0 |
| 40  | 41  | 1 | 0 | 0 | 0 | 0 |
| 41  | 42  | 1 | 0 | 0 | 0 | 0 |
| 41  | 49  | 2 | 0 | 0 | 0 | 0 |
| 42  | 43  | 1 | 0 | 0 | 0 | 0 |
| 42  | 44  | 1 | 0 | 0 | 0 | 0 |
| 42  | 45  | 1 | 0 | 0 | 0 | 0 |
| 45  | 46  | 1 | 0 | 0 | 0 | 0 |
| 45  | 47  | 1 | 0 | 0 | 0 | 0 |
| 45  | 70  | 1 | 0 | 0 | 0 | 0 |
| 50  | 51  | 1 | 0 | 0 | 0 | 0 |
| 50  | 52  | 1 | 0 | 0 | 0 | 0 |
| 52  | 53  | 1 | 0 | 0 | 0 | 0 |
| 52  | 54  | 1 | 0 | 0 | 0 | 0 |
| 52  | 55  | 1 | 0 | 0 | 0 | 0 |
| 55  | 56  | 1 | 0 | 0 | 0 | 0 |
| 55  | 57  | 1 | 0 | 0 | 0 | 0 |
| 55  | 58  | 1 | 0 | 0 | 0 | 0 |
| 58  | 59  | 1 | 0 | 0 | 0 | 0 |
| 58  | 60  | 1 | 0 | 0 | 0 | 0 |
| 58  | 61  | 1 | 0 | 0 | 0 | 0 |
| 61  | 62  | 1 | 0 | 0 | 0 | 0 |
| 61  | 63  | 1 | 0 | 0 | 0 | 0 |
| 61  | 64  | 1 | 0 | 0 | 0 | 0 |
| 64  | 65  | 1 | 0 | 0 | 0 | 0 |
| 64  | 66  | 1 | 0 | 0 | 0 | 0 |
| 64  | 67  | 1 | 0 | 0 | 0 | 0 |
| 67  | 68  | 1 | 0 | 0 | 0 | 0 |
| 67  | 69  | 1 | 0 | 0 | 0 | 0 |
| 67  | 70  | 1 | 0 | 0 | 0 | 0 |
| 70  | 71  | 1 | 0 | 0 | 0 | 0 |
| 71  | 72  | 1 | 0 | 0 | 0 | 0 |
| 71  | 73  | 1 | 0 | 0 | 0 | 0 |
| 71  | 74  | 1 | 0 | 0 | 0 | 0 |
| 74  | 75  | 1 | 0 | 0 | 0 | 0 |
| 74  | 76  | 1 | 0 | 0 | 0 | 0 |
| 74  | 77  | 1 | 0 | 0 | 0 | 0 |
| 77  | 78  | 1 | 0 | 0 | 0 | 0 |
| 77  | 96  | 2 | 0 | 0 | 0 | 0 |
| 78  | 79  | 1 | 0 | 0 | 0 | 0 |
| 79  | 80  | 1 | 0 | 0 | 0 | 0 |
| 79  | 81  | 1 | 0 | 0 | 0 | 0 |
| 79  | 82  | 1 | 0 | 0 | 0 | 0 |
| 82  | 83  | 1 | 0 | 0 | 0 | 0 |
| 82  | 84  | 1 | 0 | 0 | 0 | 0 |
| 82  | 85  | 1 | 0 | 0 | 0 | 0 |
| 85  | 86  | 1 | 0 | 0 | 0 | 0 |
| 85  | 87  | 1 | 0 | 0 | 0 | 0 |
| 85  | 88  | 1 | 0 | 0 | 0 | 0 |
| 88  | 89  | 1 | 0 | 0 | 0 | 0 |
| 89  | 90  | 1 | 0 | 0 | 0 | 0 |
| 89  | 97  | 2 | 0 | 0 | 0 | 0 |
| 90  | 91  | 1 | 0 | 0 | 0 | 0 |
| 90  | 92  | 1 | 0 | 0 | 0 | 0 |
| 90  | 93  | 1 | 0 | 0 | 0 | 0 |
| 93  | 94  | 1 | 0 | 0 | 0 | 0 |
| 93  | 95  | 1 | 0 | 0 | 0 | 0 |
| 93  | 118 | 1 | 0 | 0 | 0 | 0 |
| 98  | 99  | 1 | 0 | 0 | 0 | 0 |
| 98  | 100 | 1 | 0 | 0 | 0 | 0 |
| 100 | 101 | 1 | 0 | 0 | 0 | 0 |
| 100 | 102 | 1 | 0 | 0 | 0 | 0 |
| 100 | 103 | 1 | 0 | 0 | 0 | 0 |
| 103 | 104 | 1 | 0 | 0 | 0 | 0 |
| 103 | 105 | 1 | 0 | 0 | 0 | 0 |
| 103 | 106 | 1 | 0 | 0 | 0 | 0 |
| 106 | 107 | 1 | 0 | 0 | 0 | 0 |
| 106 | 108 | 1 | 0 | 0 | 0 | 0 |
| 106 | 109 | 1 | 0 | 0 | 0 | 0 |
| 109 | 110 | 1 | 0 | 0 | 0 | 0 |
| 109 | 111 | 1 | 0 | 0 | 0 | 0 |
| 109 | 112 | 1 | 0 | 0 | 0 | 0 |
| 112 | 113 | 1 | 0 | 0 | 0 | 0 |
| 112 | 114 | 1 | 0 | 0 | 0 | 0 |
| 112 | 115 | 1 | 0 | 0 | 0 | 0 |
| 115 | 116 | 1 | 0 | 0 | 0 | 0 |
| 115 | 117 | 1 | 0 | 0 | 0 | 0 |
| 115 | 118 | 1 | 0 | 0 | 0 | 0 |
| 118 | 119 | 1 | 0 | 0 | 0 | 0 |
| 119 | 120 | 1 | 0 | 0 | 0 | 0 |

|        |   |   |   |   |   |
|--------|---|---|---|---|---|
| 119121 | 1 | 0 | 0 | 0 | 0 |
| 119122 | 1 | 0 | 0 | 0 | 0 |
| 122123 | 1 | 0 | 0 | 0 | 0 |
| 122124 | 1 | 0 | 0 | 0 | 0 |
| 122125 | 1 | 0 | 0 | 0 | 0 |
| 125126 | 1 | 0 | 0 | 0 | 0 |
| 125144 | 2 | 0 | 0 | 0 | 0 |
| 126127 | 1 | 0 | 0 | 0 | 0 |
| 127128 | 1 | 0 | 0 | 0 | 0 |
| 127129 | 1 | 0 | 0 | 0 | 0 |
| 127130 | 1 | 0 | 0 | 0 | 0 |
| 130131 | 1 | 0 | 0 | 0 | 0 |
| 130132 | 1 | 0 | 0 | 0 | 0 |
| 130133 | 1 | 0 | 0 | 0 | 0 |
| 133134 | 1 | 0 | 0 | 0 | 0 |
| 133135 | 1 | 0 | 0 | 0 | 0 |
| 133136 | 1 | 0 | 0 | 0 | 0 |
| 136137 | 1 | 0 | 0 | 0 | 0 |
| 137138 | 1 | 0 | 0 | 0 | 0 |
| 137145 | 2 | 0 | 0 | 0 | 0 |
| 138139 | 1 | 0 | 0 | 0 | 0 |
| 138140 | 1 | 0 | 0 | 0 | 0 |
| 138141 | 1 | 0 | 0 | 0 | 0 |
| 141142 | 1 | 0 | 0 | 0 | 0 |
| 141143 | 1 | 0 | 0 | 0 | 0 |
| 141166 | 1 | 0 | 0 | 0 | 0 |
| 146147 | 1 | 0 | 0 | 0 | 0 |
| 146148 | 1 | 0 | 0 | 0 | 0 |
| 148149 | 1 | 0 | 0 | 0 | 0 |
| 148150 | 1 | 0 | 0 | 0 | 0 |
| 148151 | 1 | 0 | 0 | 0 | 0 |
| 151152 | 1 | 0 | 0 | 0 | 0 |
| 151153 | 1 | 0 | 0 | 0 | 0 |
| 151154 | 1 | 0 | 0 | 0 | 0 |
| 154155 | 1 | 0 | 0 | 0 | 0 |
| 154156 | 1 | 0 | 0 | 0 | 0 |
| 154157 | 1 | 0 | 0 | 0 | 0 |
| 157158 | 1 | 0 | 0 | 0 | 0 |
| 157159 | 1 | 0 | 0 | 0 | 0 |
| 157160 | 1 | 0 | 0 | 0 | 0 |
| 160161 | 1 | 0 | 0 | 0 | 0 |
| 160162 | 1 | 0 | 0 | 0 | 0 |
| 160163 | 1 | 0 | 0 | 0 | 0 |
| 163164 | 1 | 0 | 0 | 0 | 0 |
| 163165 | 1 | 0 | 0 | 0 | 0 |
| 163166 | 1 | 0 | 0 | 0 | 0 |
| 166167 | 1 | 0 | 0 | 0 | 0 |
| 167168 | 1 | 0 | 0 | 0 | 0 |
| 167169 | 1 | 0 | 0 | 0 | 0 |
| 167170 | 1 | 0 | 0 | 0 | 0 |
| 170171 | 1 | 0 | 0 | 0 | 0 |
| 170172 | 1 | 0 | 0 | 0 | 0 |
| 170173 | 1 | 0 | 0 | 0 | 0 |
| 173174 | 1 | 0 | 0 | 0 | 0 |
| 173192 | 2 | 0 | 0 | 0 | 0 |
| 174175 | 1 | 0 | 0 | 0 | 0 |
| 175176 | 1 | 0 | 0 | 0 | 0 |
| 175177 | 1 | 0 | 0 | 0 | 0 |
| 175178 | 1 | 0 | 0 | 0 | 0 |
| 178179 | 1 | 0 | 0 | 0 | 0 |
| 178180 | 1 | 0 | 0 | 0 | 0 |
| 178181 | 1 | 0 | 0 | 0 | 0 |
| 181182 | 1 | 0 | 0 | 0 | 0 |
| 181183 | 1 | 0 | 0 | 0 | 0 |
| 181184 | 1 | 0 | 0 | 0 | 0 |
| 184185 | 1 | 0 | 0 | 0 | 0 |
| 185186 | 1 | 0 | 0 | 0 | 0 |
| 185193 | 2 | 0 | 0 | 0 | 0 |
| 186187 | 1 | 0 | 0 | 0 | 0 |
| 186188 | 1 | 0 | 0 | 0 | 0 |
| 186189 | 1 | 0 | 0 | 0 | 0 |
| 189190 | 1 | 0 | 0 | 0 | 0 |
| 189191 | 1 | 0 | 0 | 0 | 0 |
| 189214 | 1 | 0 | 0 | 0 | 0 |
| 194195 | 1 | 0 | 0 | 0 | 0 |
| 194196 | 1 | 0 | 0 | 0 | 0 |
| 196197 | 1 | 0 | 0 | 0 | 0 |
| 196198 | 1 | 0 | 0 | 0 | 0 |
| 196199 | 1 | 0 | 0 | 0 | 0 |
| 199200 | 1 | 0 | 0 | 0 | 0 |
| 199201 | 1 | 0 | 0 | 0 | 0 |

```

199202 1 0 0 0 0
202203 1 0 0 0 0
202204 1 0 0 0 0
202205 1 0 0 0 0
205206 1 0 0 0 0
205207 1 0 0 0 0
205208 1 0 0 0 0
208209 1 0 0 0 0
208210 1 0 0 0 0
208211 1 0 0 0 0
211212 1 0 0 0 0
211213 1 0 0 0 0
211214 1 0 0 0 0
214215 1 0 0 0 0
215216 1 0 0 0 0
215217 1 0 0 0 0
215218 1 0 0 0 0
218219 1 0 0 0 0
218220 1 0 0 0 0
218221 1 0 0 0 0
221222 1 0 0 0 0
221240 2 0 0 0 0
222223 1 0 0 0 0
223224 1 0 0 0 0
223225 1 0 0 0 0
223226 1 0 0 0 0
226227 1 0 0 0 0
226228 1 0 0 0 0
226229 1 0 0 0 0
229230 1 0 0 0 0
229231 1 0 0 0 0
229232 1 0 0 0 0
232233 1 0 0 0 0
233234 1 0 0 0 0
233241 2 0 0 0 0
234235 1 0 0 0 0
234236 1 0 0 0 0
234237 1 0 0 0 0
237238 1 0 0 0 0
237239 1 0 0 0 0
237262 1 0 0 0 0
242243 1 0 0 0 0
242244 1 0 0 0 0
244245 1 0 0 0 0
244246 1 0 0 0 0
244247 1 0 0 0 0
247248 1 0 0 0 0
247249 1 0 0 0 0
247250 1 0 0 0 0
250251 1 0 0 0 0
250252 1 0 0 0 0
250253 1 0 0 0 0
253254 1 0 0 0 0
253255 1 0 0 0 0
253256 1 0 0 0 0
256257 1 0 0 0 0
256258 1 0 0 0 0
256259 1 0 0 0 0
259260 1 0 0 0 0
259261 1 0 0 0 0
259262 1 0 0 0 0
262263 1 0 0 0 0

```

```

M END
> <NAME>
II36_12

```

```

$$$$
JJ20_12
MOE2012 3D

```

```

239238 0 0 1 0 0 0 0 0999 V2000
18.2580 -9.4820 1.6050 O 0 0 0 0 0 0 0 0 0 0 0 0 0 0 0 0
18.8210 -8.7420 1.8880 H 0 0 0 0 0 0 0 0 0 0 0 0 0 0 0 0
18.8590 -10.0490 0.4490 C 0 0 0 0 0 0 0 0 0 0 0 0 0 0 0 0
18.9300 -9.2740 -0.3220 H 0 0 0 0 0 0 0 0 0 0 0 0 0 0 0 0
19.8670 -10.3840 0.7110 H 0 0 0 0 0 0 0 0 0 0 0 0 0 0 0 0
18.0050 -11.2150 -0.0300 C 0 0 0 0 0 0 0 0 0 0 0 0 0 0 0 0
17.8990 -11.9420 0.7860 H 0 0 0 0 0 0 0 0 0 0 0 0 0 0 0 0
16.9900 -10.8560 -0.2450 H 0 0 0 0 0 0 0 0 0 0 0 0 0 0 0 0
18.6120 -11.8780 -1.2660 C 0 0 0 0 0 0 0 0 0 0 0 0 0 0 0 0
18.6980 -11.1290 -2.0600 H 0 0 0 0 0 0 0 0 0 0 0 0 0 0 0 0

```









|    |     |   |   |   |   |   |
|----|-----|---|---|---|---|---|
| 14 | 16  | 1 | 0 | 0 | 0 | 0 |
| 14 | 17  | 1 | 0 | 0 | 0 | 0 |
| 17 | 18  | 1 | 0 | 0 | 0 | 0 |
| 17 | 19  | 1 | 0 | 0 | 0 | 0 |
| 17 | 20  | 1 | 0 | 0 | 0 | 0 |
| 20 | 21  | 1 | 0 | 0 | 0 | 0 |
| 20 | 25  | 2 | 0 | 0 | 0 | 0 |
| 21 | 22  | 1 | 0 | 0 | 0 | 0 |
| 22 | 23  | 1 | 0 | 0 | 0 | 0 |
| 22 | 24  | 1 | 0 | 0 | 0 | 0 |
| 22 | 26  | 1 | 0 | 0 | 0 | 0 |
| 26 | 27  | 1 | 0 | 0 | 0 | 0 |
| 26 | 28  | 1 | 0 | 0 | 0 | 0 |
| 26 | 44  | 1 | 0 | 0 | 0 | 0 |
| 29 | 30  | 1 | 0 | 0 | 0 | 0 |
| 29 | 31  | 1 | 0 | 0 | 0 | 0 |
| 29 | 32  | 1 | 0 | 0 | 0 | 0 |
| 29 | 44  | 1 | 0 | 0 | 0 | 0 |
| 32 | 33  | 1 | 0 | 0 | 0 | 0 |
| 32 | 34  | 1 | 0 | 0 | 0 | 0 |
| 32 | 35  | 1 | 0 | 0 | 0 | 0 |
| 35 | 36  | 1 | 0 | 0 | 0 | 0 |
| 36 | 37  | 1 | 0 | 0 | 0 | 0 |
| 36 | 43  | 2 | 0 | 0 | 0 | 0 |
| 37 | 38  | 1 | 0 | 0 | 0 | 0 |
| 37 | 39  | 1 | 0 | 0 | 0 | 0 |
| 37 | 40  | 1 | 0 | 0 | 0 | 0 |
| 40 | 41  | 1 | 0 | 0 | 0 | 0 |
| 40 | 42  | 1 | 0 | 0 | 0 | 0 |
| 40 | 58  | 1 | 0 | 0 | 0 | 0 |
| 44 | 45  | 1 | 0 | 0 | 0 | 0 |
| 44 | 46  | 1 | 0 | 0 | 0 | 0 |
| 47 | 48  | 1 | 0 | 0 | 0 | 0 |
| 47 | 49  | 1 | 0 | 0 | 0 | 0 |
| 49 | 50  | 1 | 0 | 0 | 0 | 0 |
| 49 | 51  | 1 | 0 | 0 | 0 | 0 |
| 49 | 52  | 1 | 0 | 0 | 0 | 0 |
| 52 | 53  | 1 | 0 | 0 | 0 | 0 |
| 52 | 54  | 1 | 0 | 0 | 0 | 0 |
| 52 | 55  | 1 | 0 | 0 | 0 | 0 |
| 55 | 56  | 1 | 0 | 0 | 0 | 0 |
| 55 | 57  | 1 | 0 | 0 | 0 | 0 |
| 55 | 58  | 1 | 0 | 0 | 0 | 0 |
| 58 | 59  | 1 | 0 | 0 | 0 | 0 |
| 59 | 60  | 1 | 0 | 0 | 0 | 0 |
| 59 | 61  | 1 | 0 | 0 | 0 | 0 |
| 59 | 62  | 1 | 0 | 0 | 0 | 0 |
| 62 | 63  | 1 | 0 | 0 | 0 | 0 |
| 62 | 64  | 1 | 0 | 0 | 0 | 0 |
| 62 | 65  | 1 | 0 | 0 | 0 | 0 |
| 65 | 66  | 1 | 0 | 0 | 0 | 0 |
| 65 | 70  | 2 | 0 | 0 | 0 | 0 |
| 66 | 67  | 1 | 0 | 0 | 0 | 0 |
| 67 | 68  | 1 | 0 | 0 | 0 | 0 |
| 67 | 69  | 1 | 0 | 0 | 0 | 0 |
| 67 | 71  | 1 | 0 | 0 | 0 | 0 |
| 71 | 72  | 1 | 0 | 0 | 0 | 0 |
| 71 | 73  | 1 | 0 | 0 | 0 | 0 |
| 71 | 89  | 1 | 0 | 0 | 0 | 0 |
| 74 | 75  | 1 | 0 | 0 | 0 | 0 |
| 74 | 76  | 1 | 0 | 0 | 0 | 0 |
| 74 | 77  | 1 | 0 | 0 | 0 | 0 |
| 74 | 89  | 1 | 0 | 0 | 0 | 0 |
| 77 | 78  | 1 | 0 | 0 | 0 | 0 |
| 77 | 79  | 1 | 0 | 0 | 0 | 0 |
| 77 | 80  | 1 | 0 | 0 | 0 | 0 |
| 80 | 81  | 1 | 0 | 0 | 0 | 0 |
| 81 | 82  | 1 | 0 | 0 | 0 | 0 |
| 81 | 88  | 2 | 0 | 0 | 0 | 0 |
| 82 | 83  | 1 | 0 | 0 | 0 | 0 |
| 82 | 84  | 1 | 0 | 0 | 0 | 0 |
| 82 | 85  | 1 | 0 | 0 | 0 | 0 |
| 85 | 86  | 1 | 0 | 0 | 0 | 0 |
| 85 | 87  | 1 | 0 | 0 | 0 | 0 |
| 85 | 103 | 1 | 0 | 0 | 0 | 0 |
| 89 | 90  | 1 | 0 | 0 | 0 | 0 |
| 89 | 91  | 1 | 0 | 0 | 0 | 0 |
| 92 | 93  | 1 | 0 | 0 | 0 | 0 |
| 92 | 94  | 1 | 0 | 0 | 0 | 0 |
| 94 | 95  | 1 | 0 | 0 | 0 | 0 |
| 94 | 96  | 1 | 0 | 0 | 0 | 0 |

|     |     |   |   |   |   |   |
|-----|-----|---|---|---|---|---|
| 94  | 97  | 1 | 0 | 0 | 0 | 0 |
| 97  | 98  | 1 | 0 | 0 | 0 | 0 |
| 97  | 99  | 1 | 0 | 0 | 0 | 0 |
| 97  | 100 | 1 | 0 | 0 | 0 | 0 |
| 100 | 101 | 1 | 0 | 0 | 0 | 0 |
| 100 | 102 | 1 | 0 | 0 | 0 | 0 |
| 100 | 103 | 1 | 0 | 0 | 0 | 0 |
| 103 | 104 | 1 | 0 | 0 | 0 | 0 |
| 104 | 105 | 1 | 0 | 0 | 0 | 0 |
| 104 | 106 | 1 | 0 | 0 | 0 | 0 |
| 104 | 107 | 1 | 0 | 0 | 0 | 0 |
| 107 | 108 | 1 | 0 | 0 | 0 | 0 |
| 107 | 109 | 1 | 0 | 0 | 0 | 0 |
| 107 | 110 | 1 | 0 | 0 | 0 | 0 |
| 110 | 111 | 1 | 0 | 0 | 0 | 0 |
| 110 | 115 | 2 | 0 | 0 | 0 | 0 |
| 111 | 112 | 1 | 0 | 0 | 0 | 0 |
| 112 | 113 | 1 | 0 | 0 | 0 | 0 |
| 112 | 114 | 1 | 0 | 0 | 0 | 0 |
| 112 | 116 | 1 | 0 | 0 | 0 | 0 |
| 116 | 117 | 1 | 0 | 0 | 0 | 0 |
| 116 | 118 | 1 | 0 | 0 | 0 | 0 |
| 116 | 134 | 1 | 0 | 0 | 0 | 0 |
| 119 | 120 | 1 | 0 | 0 | 0 | 0 |
| 119 | 121 | 1 | 0 | 0 | 0 | 0 |
| 119 | 122 | 1 | 0 | 0 | 0 | 0 |
| 119 | 134 | 1 | 0 | 0 | 0 | 0 |
| 122 | 123 | 1 | 0 | 0 | 0 | 0 |
| 122 | 124 | 1 | 0 | 0 | 0 | 0 |
| 122 | 125 | 1 | 0 | 0 | 0 | 0 |
| 125 | 126 | 1 | 0 | 0 | 0 | 0 |
| 126 | 127 | 1 | 0 | 0 | 0 | 0 |
| 126 | 133 | 2 | 0 | 0 | 0 | 0 |
| 127 | 128 | 1 | 0 | 0 | 0 | 0 |
| 127 | 129 | 1 | 0 | 0 | 0 | 0 |
| 127 | 130 | 1 | 0 | 0 | 0 | 0 |
| 130 | 131 | 1 | 0 | 0 | 0 | 0 |
| 130 | 132 | 1 | 0 | 0 | 0 | 0 |
| 130 | 148 | 1 | 0 | 0 | 0 | 0 |
| 134 | 135 | 1 | 0 | 0 | 0 | 0 |
| 134 | 136 | 1 | 0 | 0 | 0 | 0 |
| 137 | 138 | 1 | 0 | 0 | 0 | 0 |
| 137 | 139 | 1 | 0 | 0 | 0 | 0 |
| 139 | 140 | 1 | 0 | 0 | 0 | 0 |
| 139 | 141 | 1 | 0 | 0 | 0 | 0 |
| 139 | 142 | 1 | 0 | 0 | 0 | 0 |
| 142 | 143 | 1 | 0 | 0 | 0 | 0 |
| 142 | 144 | 1 | 0 | 0 | 0 | 0 |
| 142 | 145 | 1 | 0 | 0 | 0 | 0 |
| 145 | 146 | 1 | 0 | 0 | 0 | 0 |
| 145 | 147 | 1 | 0 | 0 | 0 | 0 |
| 145 | 148 | 1 | 0 | 0 | 0 | 0 |
| 148 | 149 | 1 | 0 | 0 | 0 | 0 |
| 149 | 150 | 1 | 0 | 0 | 0 | 0 |
| 149 | 151 | 1 | 0 | 0 | 0 | 0 |
| 149 | 152 | 1 | 0 | 0 | 0 | 0 |
| 152 | 153 | 1 | 0 | 0 | 0 | 0 |
| 152 | 154 | 1 | 0 | 0 | 0 | 0 |
| 152 | 155 | 1 | 0 | 0 | 0 | 0 |
| 155 | 156 | 1 | 0 | 0 | 0 | 0 |
| 155 | 160 | 2 | 0 | 0 | 0 | 0 |
| 156 | 157 | 1 | 0 | 0 | 0 | 0 |
| 157 | 158 | 1 | 0 | 0 | 0 | 0 |
| 157 | 159 | 1 | 0 | 0 | 0 | 0 |
| 157 | 161 | 1 | 0 | 0 | 0 | 0 |
| 161 | 162 | 1 | 0 | 0 | 0 | 0 |
| 161 | 163 | 1 | 0 | 0 | 0 | 0 |
| 161 | 179 | 1 | 0 | 0 | 0 | 0 |
| 164 | 165 | 1 | 0 | 0 | 0 | 0 |
| 164 | 166 | 1 | 0 | 0 | 0 | 0 |
| 164 | 167 | 1 | 0 | 0 | 0 | 0 |
| 164 | 179 | 1 | 0 | 0 | 0 | 0 |
| 167 | 168 | 1 | 0 | 0 | 0 | 0 |
| 167 | 169 | 1 | 0 | 0 | 0 | 0 |
| 167 | 170 | 1 | 0 | 0 | 0 | 0 |
| 170 | 171 | 1 | 0 | 0 | 0 | 0 |
| 171 | 172 | 1 | 0 | 0 | 0 | 0 |
| 171 | 178 | 2 | 0 | 0 | 0 | 0 |
| 172 | 173 | 1 | 0 | 0 | 0 | 0 |
| 172 | 174 | 1 | 0 | 0 | 0 | 0 |
| 172 | 175 | 1 | 0 | 0 | 0 | 0 |

```

175176 1 0 0 0 0
175177 1 0 0 0 0
175193 1 0 0 0 0
179180 1 0 0 0 0
179181 1 0 0 0 0
182183 1 0 0 0 0
182184 1 0 0 0 0
184185 1 0 0 0 0
184186 1 0 0 0 0
184187 1 0 0 0 0
187188 1 0 0 0 0
187189 1 0 0 0 0
187190 1 0 0 0 0
190191 1 0 0 0 0
190192 1 0 0 0 0
190193 1 0 0 0 0
193194 1 0 0 0 0
194195 1 0 0 0 0
194196 1 0 0 0 0
194197 1 0 0 0 0
197198 1 0 0 0 0
197199 1 0 0 0 0
197200 1 0 0 0 0
200201 1 0 0 0 0
200205 2 0 0 0 0
201202 1 0 0 0 0
202203 1 0 0 0 0
202204 1 0 0 0 0
202206 1 0 0 0 0
206207 1 0 0 0 0
206208 1 0 0 0 0
206224 1 0 0 0 0
209210 1 0 0 0 0
209211 1 0 0 0 0
209212 1 0 0 0 0
209224 1 0 0 0 0
212213 1 0 0 0 0
212214 1 0 0 0 0
212215 1 0 0 0 0
215216 1 0 0 0 0
216217 1 0 0 0 0
216223 2 0 0 0 0
217218 1 0 0 0 0
217219 1 0 0 0 0
217220 1 0 0 0 0
220221 1 0 0 0 0
220222 1 0 0 0 0
220238 1 0 0 0 0
224225 1 0 0 0 0
224226 1 0 0 0 0
227228 1 0 0 0 0
227229 1 0 0 0 0
229230 1 0 0 0 0
229231 1 0 0 0 0
229232 1 0 0 0 0
232233 1 0 0 0 0
232234 1 0 0 0 0
232235 1 0 0 0 0
235236 1 0 0 0 0
235237 1 0 0 0 0
235238 1 0 0 0 0
238239 1 0 0 0 0

```

```

M END
> <NAME>
JJ20_12

```

```

$$$$
JJ24_12
MOE2012 3D

```

```

245244 0 0 1 0 0 0 0 0999 V2000
28.8720 -14.3370 -3.3320 O 0 0 0 0 0 0 0 0 0 0 0 0 0 0 0 0
28.3650 -14.5910 -4.1240 H 0 0 0 0 0 0 0 0 0 0 0 0 0 0 0 0
27.9190 -14.0890 -2.2970 C 0 0 0 0 0 0 0 0 0 0 0 0 0 0 0 0
27.2910 -13.2430 -2.5910 H 0 0 0 0 0 0 0 0 0 0 0 0 0 0 0 0
27.3030 -14.9880 -2.1900 H 0 0 0 0 0 0 0 0 0 0 0 0 0 0 0 0
28.6900 -13.7960 -1.0120 C 0 0 3 0 0 0 0 0 0 0 0 0 0 0 0 0
29.3680 -12.9480 -1.1730 H 0 0 0 0 0 0 0 0 0 0 0 0 0 0 0 0
27.7420 -13.5200 0.1620 C 0 0 0 0 0 0 0 0 0 0 0 0 0 0 0 0
27.0620 -12.7080 -0.1150 H 0 0 0 0 0 0 0 0 0 0 0 0 0 0 0 0
27.1490 -14.4170 0.3770 H 0 0 0 0 0 0 0 0 0 0 0 0 0 0 0 0

```









|    |    |   |   |   |   |   |
|----|----|---|---|---|---|---|
| 8  | 9  | 1 | 0 | 0 | 0 | 0 |
| 8  | 10 | 1 | 0 | 0 | 0 | 0 |
| 8  | 11 | 1 | 0 | 0 | 0 | 0 |
| 11 | 12 | 1 | 0 | 0 | 0 | 0 |
| 11 | 15 | 1 | 0 | 0 | 0 | 0 |
| 13 | 14 | 1 | 0 | 0 | 0 | 0 |
| 15 | 16 | 1 | 0 | 0 | 0 | 0 |
| 15 | 17 | 1 | 0 | 0 | 0 | 0 |
| 15 | 18 | 1 | 0 | 0 | 0 | 0 |
| 18 | 19 | 1 | 0 | 0 | 0 | 0 |
| 18 | 20 | 1 | 0 | 0 | 0 | 0 |
| 18 | 21 | 1 | 0 | 0 | 0 | 0 |
| 21 | 22 | 1 | 0 | 0 | 0 | 0 |
| 21 | 26 | 2 | 0 | 0 | 0 | 0 |
| 22 | 23 | 1 | 0 | 0 | 0 | 0 |
| 23 | 24 | 1 | 0 | 0 | 0 | 0 |
| 23 | 25 | 1 | 0 | 0 | 0 | 0 |
| 23 | 27 | 1 | 0 | 0 | 0 | 0 |
| 27 | 28 | 1 | 0 | 0 | 0 | 0 |
| 27 | 29 | 1 | 0 | 0 | 0 | 0 |
| 27 | 45 | 1 | 0 | 0 | 0 | 0 |
| 30 | 31 | 1 | 0 | 0 | 0 | 0 |
| 30 | 32 | 1 | 0 | 0 | 0 | 0 |
| 30 | 33 | 1 | 0 | 0 | 0 | 0 |
| 30 | 45 | 1 | 0 | 0 | 0 | 0 |
| 33 | 34 | 1 | 0 | 0 | 0 | 0 |
| 33 | 35 | 1 | 0 | 0 | 0 | 0 |
| 33 | 36 | 1 | 0 | 0 | 0 | 0 |
| 36 | 37 | 1 | 0 | 0 | 0 | 0 |
| 37 | 38 | 1 | 0 | 0 | 0 | 0 |
| 37 | 44 | 2 | 0 | 0 | 0 | 0 |
| 38 | 39 | 1 | 0 | 0 | 0 | 0 |
| 38 | 40 | 1 | 0 | 0 | 0 | 0 |
| 38 | 41 | 1 | 0 | 0 | 0 | 0 |
| 41 | 42 | 1 | 0 | 0 | 0 | 0 |
| 41 | 43 | 1 | 0 | 0 | 0 | 0 |
| 41 | 58 | 1 | 0 | 0 | 0 | 0 |
| 45 | 46 | 1 | 0 | 0 | 0 | 0 |
| 45 | 47 | 1 | 0 | 0 | 0 | 0 |
| 48 | 49 | 1 | 0 | 0 | 0 | 0 |
| 48 | 50 | 1 | 0 | 0 | 0 | 0 |
| 50 | 51 | 1 | 0 | 0 | 0 | 0 |
| 50 | 52 | 1 | 0 | 0 | 0 | 0 |
| 50 | 53 | 1 | 0 | 0 | 0 | 0 |
| 53 | 54 | 1 | 0 | 0 | 0 | 0 |
| 53 | 55 | 1 | 0 | 0 | 0 | 0 |
| 53 | 59 | 1 | 0 | 0 | 0 | 0 |
| 55 | 56 | 1 | 0 | 0 | 0 | 0 |
| 55 | 57 | 1 | 0 | 0 | 0 | 0 |
| 55 | 58 | 1 | 0 | 0 | 0 | 0 |
| 58 | 61 | 1 | 0 | 0 | 0 | 0 |
| 59 | 60 | 1 | 0 | 0 | 0 | 0 |
| 61 | 62 | 1 | 0 | 0 | 0 | 0 |
| 61 | 63 | 1 | 0 | 0 | 0 | 0 |
| 61 | 64 | 1 | 0 | 0 | 0 | 0 |
| 64 | 65 | 1 | 0 | 0 | 0 | 0 |
| 64 | 66 | 1 | 0 | 0 | 0 | 0 |
| 64 | 67 | 1 | 0 | 0 | 0 | 0 |
| 67 | 68 | 1 | 0 | 0 | 0 | 0 |
| 67 | 72 | 2 | 0 | 0 | 0 | 0 |
| 68 | 69 | 1 | 0 | 0 | 0 | 0 |
| 69 | 70 | 1 | 0 | 0 | 0 | 0 |
| 69 | 71 | 1 | 0 | 0 | 0 | 0 |
| 69 | 73 | 1 | 0 | 0 | 0 | 0 |
| 73 | 74 | 1 | 0 | 0 | 0 | 0 |
| 73 | 75 | 1 | 0 | 0 | 0 | 0 |
| 73 | 91 | 1 | 0 | 0 | 0 | 0 |
| 76 | 77 | 1 | 0 | 0 | 0 | 0 |
| 76 | 78 | 1 | 0 | 0 | 0 | 0 |
| 76 | 79 | 1 | 0 | 0 | 0 | 0 |
| 76 | 91 | 1 | 0 | 0 | 0 | 0 |
| 79 | 80 | 1 | 0 | 0 | 0 | 0 |
| 79 | 81 | 1 | 0 | 0 | 0 | 0 |
| 79 | 82 | 1 | 0 | 0 | 0 | 0 |
| 82 | 83 | 1 | 0 | 0 | 0 | 0 |
| 83 | 84 | 1 | 0 | 0 | 0 | 0 |
| 83 | 90 | 2 | 0 | 0 | 0 | 0 |
| 84 | 85 | 1 | 0 | 0 | 0 | 0 |
| 84 | 86 | 1 | 0 | 0 | 0 | 0 |
| 84 | 87 | 1 | 0 | 0 | 0 | 0 |
| 87 | 88 | 1 | 0 | 0 | 0 | 0 |

|        |   |   |   |   |   |
|--------|---|---|---|---|---|
| 87 89  | 1 | 0 | 0 | 0 | 0 |
| 87104  | 1 | 0 | 0 | 0 | 0 |
| 91 92  | 1 | 0 | 0 | 0 | 0 |
| 91 93  | 1 | 0 | 0 | 0 | 0 |
| 94 95  | 1 | 0 | 0 | 0 | 0 |
| 94 96  | 1 | 0 | 0 | 0 | 0 |
| 96 97  | 1 | 0 | 0 | 0 | 0 |
| 96 98  | 1 | 0 | 0 | 0 | 0 |
| 96 99  | 1 | 0 | 0 | 0 | 0 |
| 99100  | 1 | 0 | 0 | 0 | 0 |
| 99101  | 1 | 0 | 0 | 0 | 0 |
| 99105  | 1 | 0 | 0 | 0 | 0 |
| 101102 | 1 | 0 | 0 | 0 | 0 |
| 101103 | 1 | 0 | 0 | 0 | 0 |
| 101104 | 1 | 0 | 0 | 0 | 0 |
| 104107 | 1 | 0 | 0 | 0 | 0 |
| 105106 | 1 | 0 | 0 | 0 | 0 |
| 107108 | 1 | 0 | 0 | 0 | 0 |
| 107109 | 1 | 0 | 0 | 0 | 0 |
| 107110 | 1 | 0 | 0 | 0 | 0 |
| 110111 | 1 | 0 | 0 | 0 | 0 |
| 110112 | 1 | 0 | 0 | 0 | 0 |
| 110113 | 1 | 0 | 0 | 0 | 0 |
| 113114 | 1 | 0 | 0 | 0 | 0 |
| 113118 | 2 | 0 | 0 | 0 | 0 |
| 114115 | 1 | 0 | 0 | 0 | 0 |
| 115116 | 1 | 0 | 0 | 0 | 0 |
| 115117 | 1 | 0 | 0 | 0 | 0 |
| 115119 | 1 | 0 | 0 | 0 | 0 |
| 119120 | 1 | 0 | 0 | 0 | 0 |
| 119121 | 1 | 0 | 0 | 0 | 0 |
| 119137 | 1 | 0 | 0 | 0 | 0 |
| 122123 | 1 | 0 | 0 | 0 | 0 |
| 122124 | 1 | 0 | 0 | 0 | 0 |
| 122125 | 1 | 0 | 0 | 0 | 0 |
| 122137 | 1 | 0 | 0 | 0 | 0 |
| 125126 | 1 | 0 | 0 | 0 | 0 |
| 125127 | 1 | 0 | 0 | 0 | 0 |
| 125128 | 1 | 0 | 0 | 0 | 0 |
| 128129 | 1 | 0 | 0 | 0 | 0 |
| 129130 | 1 | 0 | 0 | 0 | 0 |
| 129136 | 2 | 0 | 0 | 0 | 0 |
| 130131 | 1 | 0 | 0 | 0 | 0 |
| 130132 | 1 | 0 | 0 | 0 | 0 |
| 130133 | 1 | 0 | 0 | 0 | 0 |
| 133134 | 1 | 0 | 0 | 0 | 0 |
| 133135 | 1 | 0 | 0 | 0 | 0 |
| 133150 | 1 | 0 | 0 | 0 | 0 |
| 137138 | 1 | 0 | 0 | 0 | 0 |
| 137139 | 1 | 0 | 0 | 0 | 0 |
| 140141 | 1 | 0 | 0 | 0 | 0 |
| 140142 | 1 | 0 | 0 | 0 | 0 |
| 142143 | 1 | 0 | 0 | 0 | 0 |
| 142144 | 1 | 0 | 0 | 0 | 0 |
| 142145 | 1 | 0 | 0 | 0 | 0 |
| 145146 | 1 | 0 | 0 | 0 | 0 |
| 145147 | 1 | 0 | 0 | 0 | 0 |
| 145151 | 1 | 0 | 0 | 0 | 0 |
| 147148 | 1 | 0 | 0 | 0 | 0 |
| 147149 | 1 | 0 | 0 | 0 | 0 |
| 147150 | 1 | 0 | 0 | 0 | 0 |
| 150153 | 1 | 0 | 0 | 0 | 0 |
| 151152 | 1 | 0 | 0 | 0 | 0 |
| 153154 | 1 | 0 | 0 | 0 | 0 |
| 153155 | 1 | 0 | 0 | 0 | 0 |
| 153156 | 1 | 0 | 0 | 0 | 0 |
| 156157 | 1 | 0 | 0 | 0 | 0 |
| 156158 | 1 | 0 | 0 | 0 | 0 |
| 156159 | 1 | 0 | 0 | 0 | 0 |
| 159160 | 1 | 0 | 0 | 0 | 0 |
| 159164 | 2 | 0 | 0 | 0 | 0 |
| 160161 | 1 | 0 | 0 | 0 | 0 |
| 161162 | 1 | 0 | 0 | 0 | 0 |
| 161163 | 1 | 0 | 0 | 0 | 0 |
| 161165 | 1 | 0 | 0 | 0 | 0 |
| 165166 | 1 | 0 | 0 | 0 | 0 |
| 165167 | 1 | 0 | 0 | 0 | 0 |
| 165183 | 1 | 0 | 0 | 0 | 0 |
| 168169 | 1 | 0 | 0 | 0 | 0 |
| 168170 | 1 | 0 | 0 | 0 | 0 |
| 168171 | 1 | 0 | 0 | 0 | 0 |

|        |   |   |   |   |   |
|--------|---|---|---|---|---|
| 168183 | 1 | 0 | 0 | 0 | 0 |
| 171172 | 1 | 0 | 0 | 0 | 0 |
| 171173 | 1 | 0 | 0 | 0 | 0 |
| 171174 | 1 | 0 | 0 | 0 | 0 |
| 174175 | 1 | 0 | 0 | 0 | 0 |
| 175176 | 1 | 0 | 0 | 0 | 0 |
| 175182 | 2 | 0 | 0 | 0 | 0 |
| 176177 | 1 | 0 | 0 | 0 | 0 |
| 176178 | 1 | 0 | 0 | 0 | 0 |
| 176179 | 1 | 0 | 0 | 0 | 0 |
| 179180 | 1 | 0 | 0 | 0 | 0 |
| 179181 | 1 | 0 | 0 | 0 | 0 |
| 179196 | 1 | 0 | 0 | 0 | 0 |
| 183184 | 1 | 0 | 0 | 0 | 0 |
| 183185 | 1 | 0 | 0 | 0 | 0 |
| 186187 | 1 | 0 | 0 | 0 | 0 |
| 186188 | 1 | 0 | 0 | 0 | 0 |
| 188189 | 1 | 0 | 0 | 0 | 0 |
| 188190 | 1 | 0 | 0 | 0 | 0 |
| 188191 | 1 | 0 | 0 | 0 | 0 |
| 191192 | 1 | 0 | 0 | 0 | 0 |
| 191193 | 1 | 0 | 0 | 0 | 0 |
| 191197 | 1 | 0 | 0 | 0 | 0 |
| 193194 | 1 | 0 | 0 | 0 | 0 |
| 193195 | 1 | 0 | 0 | 0 | 0 |
| 193196 | 1 | 0 | 0 | 0 | 0 |
| 196199 | 1 | 0 | 0 | 0 | 0 |
| 197198 | 1 | 0 | 0 | 0 | 0 |
| 199200 | 1 | 0 | 0 | 0 | 0 |
| 199201 | 1 | 0 | 0 | 0 | 0 |
| 199202 | 1 | 0 | 0 | 0 | 0 |
| 202203 | 1 | 0 | 0 | 0 | 0 |
| 202204 | 1 | 0 | 0 | 0 | 0 |
| 202205 | 1 | 0 | 0 | 0 | 0 |
| 205206 | 1 | 0 | 0 | 0 | 0 |
| 205210 | 2 | 0 | 0 | 0 | 0 |
| 206207 | 1 | 0 | 0 | 0 | 0 |
| 207208 | 1 | 0 | 0 | 0 | 0 |
| 207209 | 1 | 0 | 0 | 0 | 0 |
| 207211 | 1 | 0 | 0 | 0 | 0 |
| 211212 | 1 | 0 | 0 | 0 | 0 |
| 211213 | 1 | 0 | 0 | 0 | 0 |
| 211229 | 1 | 0 | 0 | 0 | 0 |
| 214215 | 1 | 0 | 0 | 0 | 0 |
| 214216 | 1 | 0 | 0 | 0 | 0 |
| 214217 | 1 | 0 | 0 | 0 | 0 |
| 214229 | 1 | 0 | 0 | 0 | 0 |
| 217218 | 1 | 0 | 0 | 0 | 0 |
| 217219 | 1 | 0 | 0 | 0 | 0 |
| 217220 | 1 | 0 | 0 | 0 | 0 |
| 220221 | 1 | 0 | 0 | 0 | 0 |
| 221222 | 1 | 0 | 0 | 0 | 0 |
| 221228 | 2 | 0 | 0 | 0 | 0 |
| 222223 | 1 | 0 | 0 | 0 | 0 |
| 222224 | 1 | 0 | 0 | 0 | 0 |
| 222225 | 1 | 0 | 0 | 0 | 0 |
| 225226 | 1 | 0 | 0 | 0 | 0 |
| 225227 | 1 | 0 | 0 | 0 | 0 |
| 225242 | 1 | 0 | 0 | 0 | 0 |
| 229230 | 1 | 0 | 0 | 0 | 0 |
| 229231 | 1 | 0 | 0 | 0 | 0 |
| 232233 | 1 | 0 | 0 | 0 | 0 |
| 232234 | 1 | 0 | 0 | 0 | 0 |
| 234235 | 1 | 0 | 0 | 0 | 0 |
| 234236 | 1 | 0 | 0 | 0 | 0 |
| 234237 | 1 | 0 | 0 | 0 | 0 |
| 237238 | 1 | 0 | 0 | 0 | 0 |
| 237239 | 1 | 0 | 0 | 0 | 0 |
| 237243 | 1 | 0 | 0 | 0 | 0 |
| 239240 | 1 | 0 | 0 | 0 | 0 |
| 239241 | 1 | 0 | 0 | 0 | 0 |
| 239242 | 1 | 0 | 0 | 0 | 0 |
| 242245 | 1 | 0 | 0 | 0 | 0 |
| 243244 | 1 | 0 | 0 | 0 | 0 |

M END  
> <NAME>  
JJ24\_12

\$\$\$\$  
JJ28\_12  
MOE2012

3D







|         |         |         |   |   |   |   |   |   |   |   |   |   |   |   |   |
|---------|---------|---------|---|---|---|---|---|---|---|---|---|---|---|---|---|
| 96.5640 | -1.4880 | -4.4100 | O | 0 | 0 | 0 | 0 | 0 | 0 | 0 | 0 | 0 | 0 | 0 | 0 |
| 96.8250 | -0.5820 | -4.6460 | H | 0 | 0 | 0 | 0 | 0 | 0 | 0 | 0 | 0 | 0 | 0 | 0 |
| 95.2190 | -1.4290 | -3.9570 | C | 0 | 0 | 0 | 0 | 0 | 0 | 0 | 0 | 0 | 0 | 0 | 0 |
| 95.1730 | -0.7690 | -3.0850 | H | 0 | 0 | 0 | 0 | 0 | 0 | 0 | 0 | 0 | 0 | 0 | 0 |
| 94.6010 | -1.0070 | -4.7570 | H | 0 | 0 | 0 | 0 | 0 | 0 | 0 | 0 | 0 | 0 | 0 | 0 |
| 94.7610 | -2.8350 | -3.6000 | C | 0 | 0 | 0 | 0 | 0 | 0 | 0 | 0 | 0 | 0 | 0 | 0 |
| 94.8690 | -3.4860 | -4.4770 | H | 0 | 0 | 0 | 0 | 0 | 0 | 0 | 0 | 0 | 0 | 0 | 0 |
| 95.4270 | -3.2520 | -2.8340 | H | 0 | 0 | 0 | 0 | 0 | 0 | 0 | 0 | 0 | 0 | 0 | 0 |
| 93.3150 | -2.8430 | -3.1090 | C | 0 | 0 | 0 | 0 | 0 | 0 | 0 | 0 | 0 | 0 | 0 | 0 |
| 93.2280 | -2.2050 | -2.2210 | H | 0 | 0 | 0 | 0 | 0 | 0 | 0 | 0 | 0 | 0 | 0 | 0 |
| 92.6780 | -2.4060 | -3.8870 | H | 0 | 0 | 0 | 0 | 0 | 0 | 0 | 0 | 0 | 0 | 0 | 0 |
| 92.8520 | -4.2630 | -2.7720 | C | 0 | 0 | 0 | 0 | 0 | 0 | 0 | 0 | 0 | 0 | 0 | 0 |
| 92.9100 | -4.9120 | -3.6540 | H | 0 | 0 | 0 | 0 | 0 | 0 | 0 | 0 | 0 | 0 | 0 | 0 |
| 93.5400 | -4.6850 | -2.0290 | H | 0 | 0 | 0 | 0 | 0 | 0 | 0 | 0 | 0 | 0 | 0 | 0 |
| 91.5060 | -4.2960 | -2.1930 | N | 0 | 0 | 3 | 0 | 0 | 0 | 0 | 0 | 0 | 0 | 0 | 0 |
| 91.3500 | -5.2220 | -1.7940 | H | 0 | 0 | 0 | 0 | 0 | 0 | 0 | 0 | 0 | 0 | 0 | 0 |
| 1       | 2       | 1       | 0 | 0 | 0 | 0 |   |   |   |   |   |   |   |   |   |
| 1       | 3       | 1       | 0 | 0 | 0 | 0 |   |   |   |   |   |   |   |   |   |
| 3       | 4       | 1       | 0 | 0 | 0 | 0 |   |   |   |   |   |   |   |   |   |
| 3       | 5       | 1       | 0 | 0 | 0 | 0 |   |   |   |   |   |   |   |   |   |
| 3       | 6       | 1       | 0 | 0 | 0 | 0 |   |   |   |   |   |   |   |   |   |
| 6       | 7       | 1       | 0 | 0 | 0 | 0 |   |   |   |   |   |   |   |   |   |
| 6       | 8       | 1       | 0 | 0 | 0 | 0 |   |   |   |   |   |   |   |   |   |
| 6       | 9       | 1       | 0 | 0 | 0 | 0 |   |   |   |   |   |   |   |   |   |
| 9       | 10      | 1       | 0 | 0 | 0 | 0 |   |   |   |   |   |   |   |   |   |
| 9       | 11      | 1       | 0 | 0 | 0 | 0 |   |   |   |   |   |   |   |   |   |
| 9       | 12      | 1       | 0 | 0 | 0 | 0 |   |   |   |   |   |   |   |   |   |
| 12      | 13      | 1       | 0 | 0 | 0 | 0 |   |   |   |   |   |   |   |   |   |
| 12      | 14      | 1       | 0 | 0 | 0 | 0 |   |   |   |   |   |   |   |   |   |
| 12      | 15      | 1       | 0 | 0 | 0 | 0 |   |   |   |   |   |   |   |   |   |
| 15      | 16      | 1       | 0 | 0 | 0 | 0 |   |   |   |   |   |   |   |   |   |
| 15      | 17      | 1       | 0 | 0 | 0 | 0 |   |   |   |   |   |   |   |   |   |
| 17      | 18      | 1       | 0 | 0 | 0 | 0 |   |   |   |   |   |   |   |   |   |
| 17      | 19      | 1       | 0 | 0 | 0 | 0 |   |   |   |   |   |   |   |   |   |
| 17      | 20      | 1       | 0 | 0 | 0 | 0 |   |   |   |   |   |   |   |   |   |
| 20      | 21      | 1       | 0 | 0 | 0 | 0 |   |   |   |   |   |   |   |   |   |
| 20      | 22      | 1       | 0 | 0 | 0 | 0 |   |   |   |   |   |   |   |   |   |
| 20      | 23      | 1       | 0 | 0 | 0 | 0 |   |   |   |   |   |   |   |   |   |
| 23      | 24      | 1       | 0 | 0 | 0 | 0 |   |   |   |   |   |   |   |   |   |
| 23      | 28      | 2       | 0 | 0 | 0 | 0 |   |   |   |   |   |   |   |   |   |
| 24      | 25      | 1       | 0 | 0 | 0 | 0 |   |   |   |   |   |   |   |   |   |
| 25      | 26      | 1       | 0 | 0 | 0 | 0 |   |   |   |   |   |   |   |   |   |
| 25      | 27      | 1       | 0 | 0 | 0 | 0 |   |   |   |   |   |   |   |   |   |
| 25      | 29      | 1       | 0 | 0 | 0 | 0 |   |   |   |   |   |   |   |   |   |
| 29      | 30      | 1       | 0 | 0 | 0 | 0 |   |   |   |   |   |   |   |   |   |
| 29      | 31      | 1       | 0 | 0 | 0 | 0 |   |   |   |   |   |   |   |   |   |
| 29      | 47      | 1       | 0 | 0 | 0 | 0 |   |   |   |   |   |   |   |   |   |
| 32      | 33      | 1       | 0 | 0 | 0 | 0 |   |   |   |   |   |   |   |   |   |
| 32      | 34      | 1       | 0 | 0 | 0 | 0 |   |   |   |   |   |   |   |   |   |
| 32      | 35      | 1       | 0 | 0 | 0 | 0 |   |   |   |   |   |   |   |   |   |
| 32      | 47      | 1       | 0 | 0 | 0 | 0 |   |   |   |   |   |   |   |   |   |
| 35      | 36      | 1       | 0 | 0 | 0 | 0 |   |   |   |   |   |   |   |   |   |
| 35      | 37      | 1       | 0 | 0 | 0 | 0 |   |   |   |   |   |   |   |   |   |
| 35      | 38      | 1       | 0 | 0 | 0 | 0 |   |   |   |   |   |   |   |   |   |
| 38      | 39      | 1       | 0 | 0 | 0 | 0 |   |   |   |   |   |   |   |   |   |
| 39      | 40      | 1       | 0 | 0 | 0 | 0 |   |   |   |   |   |   |   |   |   |
| 39      | 46      | 2       | 0 | 0 | 0 | 0 |   |   |   |   |   |   |   |   |   |
| 40      | 41      | 1       | 0 | 0 | 0 | 0 |   |   |   |   |   |   |   |   |   |
| 40      | 42      | 1       | 0 | 0 | 0 | 0 |   |   |   |   |   |   |   |   |   |
| 40      | 43      | 1       | 0 | 0 | 0 | 0 |   |   |   |   |   |   |   |   |   |
| 43      | 44      | 1       | 0 | 0 | 0 | 0 |   |   |   |   |   |   |   |   |   |
| 43      | 45      | 1       | 0 | 0 | 0 | 0 |   |   |   |   |   |   |   |   |   |
| 43      | 64      | 1       | 0 | 0 | 0 | 0 |   |   |   |   |   |   |   |   |   |
| 47      | 48      | 1       | 0 | 0 | 0 | 0 |   |   |   |   |   |   |   |   |   |
| 47      | 49      | 1       | 0 | 0 | 0 | 0 |   |   |   |   |   |   |   |   |   |
| 50      | 51      | 1       | 0 | 0 | 0 | 0 |   |   |   |   |   |   |   |   |   |
| 50      | 52      | 1       | 0 | 0 | 0 | 0 |   |   |   |   |   |   |   |   |   |
| 52      | 53      | 1       | 0 | 0 | 0 | 0 |   |   |   |   |   |   |   |   |   |
| 52      | 54      | 1       | 0 | 0 | 0 | 0 |   |   |   |   |   |   |   |   |   |
| 52      | 55      | 1       | 0 | 0 | 0 | 0 |   |   |   |   |   |   |   |   |   |
| 55      | 56      | 1       | 0 | 0 | 0 | 0 |   |   |   |   |   |   |   |   |   |
| 55      | 57      | 1       | 0 | 0 | 0 | 0 |   |   |   |   |   |   |   |   |   |
| 55      | 58      | 1       | 0 | 0 | 0 | 0 |   |   |   |   |   |   |   |   |   |
| 58      | 59      | 1       | 0 | 0 | 0 | 0 |   |   |   |   |   |   |   |   |   |
| 58      | 60      | 1       | 0 | 0 | 0 | 0 |   |   |   |   |   |   |   |   |   |
| 58      | 61      | 1       | 0 | 0 | 0 | 0 |   |   |   |   |   |   |   |   |   |
| 61      | 62      | 1       | 0 | 0 | 0 | 0 |   |   |   |   |   |   |   |   |   |
| 61      | 63      | 1       | 0 | 0 | 0 | 0 |   |   |   |   |   |   |   |   |   |
| 61      | 64      | 1       | 0 | 0 | 0 | 0 |   |   |   |   |   |   |   |   |   |
| 64      | 65      | 1       | 0 | 0 | 0 | 0 |   |   |   |   |   |   |   |   |   |
| 65      | 66      | 1       | 0 | 0 | 0 | 0 |   |   |   |   |   |   |   |   |   |

|     |     |   |   |   |   |   |
|-----|-----|---|---|---|---|---|
| 65  | 67  | 1 | 0 | 0 | 0 | 0 |
| 65  | 68  | 1 | 0 | 0 | 0 | 0 |
| 68  | 69  | 1 | 0 | 0 | 0 | 0 |
| 68  | 70  | 1 | 0 | 0 | 0 | 0 |
| 68  | 71  | 1 | 0 | 0 | 0 | 0 |
| 71  | 72  | 1 | 0 | 0 | 0 | 0 |
| 71  | 76  | 2 | 0 | 0 | 0 | 0 |
| 72  | 73  | 1 | 0 | 0 | 0 | 0 |
| 73  | 74  | 1 | 0 | 0 | 0 | 0 |
| 73  | 75  | 1 | 0 | 0 | 0 | 0 |
| 73  | 77  | 1 | 0 | 0 | 0 | 0 |
| 77  | 78  | 1 | 0 | 0 | 0 | 0 |
| 77  | 79  | 1 | 0 | 0 | 0 | 0 |
| 77  | 95  | 1 | 0 | 0 | 0 | 0 |
| 80  | 81  | 1 | 0 | 0 | 0 | 0 |
| 80  | 82  | 1 | 0 | 0 | 0 | 0 |
| 80  | 83  | 1 | 0 | 0 | 0 | 0 |
| 80  | 95  | 1 | 0 | 0 | 0 | 0 |
| 83  | 84  | 1 | 0 | 0 | 0 | 0 |
| 83  | 85  | 1 | 0 | 0 | 0 | 0 |
| 83  | 86  | 1 | 0 | 0 | 0 | 0 |
| 86  | 87  | 1 | 0 | 0 | 0 | 0 |
| 87  | 88  | 1 | 0 | 0 | 0 | 0 |
| 87  | 94  | 2 | 0 | 0 | 0 | 0 |
| 88  | 89  | 1 | 0 | 0 | 0 | 0 |
| 88  | 90  | 1 | 0 | 0 | 0 | 0 |
| 88  | 91  | 1 | 0 | 0 | 0 | 0 |
| 91  | 92  | 1 | 0 | 0 | 0 | 0 |
| 91  | 93  | 1 | 0 | 0 | 0 | 0 |
| 91  | 112 | 1 | 0 | 0 | 0 | 0 |
| 95  | 96  | 1 | 0 | 0 | 0 | 0 |
| 95  | 97  | 1 | 0 | 0 | 0 | 0 |
| 98  | 99  | 1 | 0 | 0 | 0 | 0 |
| 98  | 100 | 1 | 0 | 0 | 0 | 0 |
| 100 | 101 | 1 | 0 | 0 | 0 | 0 |
| 100 | 102 | 1 | 0 | 0 | 0 | 0 |
| 100 | 103 | 1 | 0 | 0 | 0 | 0 |
| 103 | 104 | 1 | 0 | 0 | 0 | 0 |
| 103 | 105 | 1 | 0 | 0 | 0 | 0 |
| 103 | 106 | 1 | 0 | 0 | 0 | 0 |
| 106 | 107 | 1 | 0 | 0 | 0 | 0 |
| 106 | 108 | 1 | 0 | 0 | 0 | 0 |
| 106 | 109 | 1 | 0 | 0 | 0 | 0 |
| 109 | 110 | 1 | 0 | 0 | 0 | 0 |
| 109 | 111 | 1 | 0 | 0 | 0 | 0 |
| 109 | 112 | 1 | 0 | 0 | 0 | 0 |
| 112 | 113 | 1 | 0 | 0 | 0 | 0 |
| 113 | 114 | 1 | 0 | 0 | 0 | 0 |
| 113 | 115 | 1 | 0 | 0 | 0 | 0 |
| 113 | 116 | 1 | 0 | 0 | 0 | 0 |
| 116 | 117 | 1 | 0 | 0 | 0 | 0 |
| 116 | 118 | 1 | 0 | 0 | 0 | 0 |
| 116 | 119 | 1 | 0 | 0 | 0 | 0 |
| 119 | 120 | 1 | 0 | 0 | 0 | 0 |
| 119 | 124 | 2 | 0 | 0 | 0 | 0 |
| 120 | 121 | 1 | 0 | 0 | 0 | 0 |
| 121 | 122 | 1 | 0 | 0 | 0 | 0 |
| 121 | 123 | 1 | 0 | 0 | 0 | 0 |
| 121 | 125 | 1 | 0 | 0 | 0 | 0 |
| 125 | 126 | 1 | 0 | 0 | 0 | 0 |
| 125 | 127 | 1 | 0 | 0 | 0 | 0 |
| 125 | 143 | 1 | 0 | 0 | 0 | 0 |
| 128 | 129 | 1 | 0 | 0 | 0 | 0 |
| 128 | 130 | 1 | 0 | 0 | 0 | 0 |
| 128 | 131 | 1 | 0 | 0 | 0 | 0 |
| 128 | 143 | 1 | 0 | 0 | 0 | 0 |
| 131 | 132 | 1 | 0 | 0 | 0 | 0 |
| 131 | 133 | 1 | 0 | 0 | 0 | 0 |
| 131 | 134 | 1 | 0 | 0 | 0 | 0 |
| 134 | 135 | 1 | 0 | 0 | 0 | 0 |
| 135 | 136 | 1 | 0 | 0 | 0 | 0 |
| 135 | 142 | 2 | 0 | 0 | 0 | 0 |
| 136 | 137 | 1 | 0 | 0 | 0 | 0 |
| 136 | 138 | 1 | 0 | 0 | 0 | 0 |
| 136 | 139 | 1 | 0 | 0 | 0 | 0 |
| 139 | 140 | 1 | 0 | 0 | 0 | 0 |
| 139 | 141 | 1 | 0 | 0 | 0 | 0 |
| 139 | 160 | 1 | 0 | 0 | 0 | 0 |
| 143 | 144 | 1 | 0 | 0 | 0 | 0 |
| 143 | 145 | 1 | 0 | 0 | 0 | 0 |
| 146 | 147 | 1 | 0 | 0 | 0 | 0 |



|        |   |   |   |   |   |
|--------|---|---|---|---|---|
| 146148 | 1 | 0 | 0 | 0 | 0 |
| 148149 | 1 | 0 | 0 | 0 | 0 |
| 148150 | 1 | 0 | 0 | 0 | 0 |
| 148151 | 1 | 0 | 0 | 0 | 0 |
| 151152 | 1 | 0 | 0 | 0 | 0 |
| 151153 | 1 | 0 | 0 | 0 | 0 |
| 151154 | 1 | 0 | 0 | 0 | 0 |
| 154155 | 1 | 0 | 0 | 0 | 0 |
| 154156 | 1 | 0 | 0 | 0 | 0 |
| 154157 | 1 | 0 | 0 | 0 | 0 |
| 157158 | 1 | 0 | 0 | 0 | 0 |
| 157159 | 1 | 0 | 0 | 0 | 0 |
| 157160 | 1 | 0 | 0 | 0 | 0 |
| 160161 | 1 | 0 | 0 | 0 | 0 |
| 161162 | 1 | 0 | 0 | 0 | 0 |
| 161163 | 1 | 0 | 0 | 0 | 0 |
| 161164 | 1 | 0 | 0 | 0 | 0 |
| 164165 | 1 | 0 | 0 | 0 | 0 |
| 164166 | 1 | 0 | 0 | 0 | 0 |
| 164167 | 1 | 0 | 0 | 0 | 0 |
| 167168 | 1 | 0 | 0 | 0 | 0 |
| 167172 | 2 | 0 | 0 | 0 | 0 |
| 168169 | 1 | 0 | 0 | 0 | 0 |
| 169170 | 1 | 0 | 0 | 0 | 0 |
| 169171 | 1 | 0 | 0 | 0 | 0 |
| 169173 | 1 | 0 | 0 | 0 | 0 |
| 173174 | 1 | 0 | 0 | 0 | 0 |
| 173175 | 1 | 0 | 0 | 0 | 0 |
| 173191 | 1 | 0 | 0 | 0 | 0 |
| 176177 | 1 | 0 | 0 | 0 | 0 |
| 176178 | 1 | 0 | 0 | 0 | 0 |
| 176179 | 1 | 0 | 0 | 0 | 0 |
| 176191 | 1 | 0 | 0 | 0 | 0 |
| 179180 | 1 | 0 | 0 | 0 | 0 |
| 179181 | 1 | 0 | 0 | 0 | 0 |
| 179182 | 1 | 0 | 0 | 0 | 0 |
| 182183 | 1 | 0 | 0 | 0 | 0 |
| 183184 | 1 | 0 | 0 | 0 | 0 |
| 183190 | 2 | 0 | 0 | 0 | 0 |
| 184185 | 1 | 0 | 0 | 0 | 0 |
| 184186 | 1 | 0 | 0 | 0 | 0 |
| 184187 | 1 | 0 | 0 | 0 | 0 |
| 187188 | 1 | 0 | 0 | 0 | 0 |
| 187189 | 1 | 0 | 0 | 0 | 0 |
| 187208 | 1 | 0 | 0 | 0 | 0 |
| 191192 | 1 | 0 | 0 | 0 | 0 |
| 191193 | 1 | 0 | 0 | 0 | 0 |
| 194195 | 1 | 0 | 0 | 0 | 0 |
| 194196 | 1 | 0 | 0 | 0 | 0 |
| 196197 | 1 | 0 | 0 | 0 | 0 |
| 196198 | 1 | 0 | 0 | 0 | 0 |
| 196199 | 1 | 0 | 0 | 0 | 0 |
| 199200 | 1 | 0 | 0 | 0 | 0 |
| 199201 | 1 | 0 | 0 | 0 | 0 |
| 199202 | 1 | 0 | 0 | 0 | 0 |
| 202203 | 1 | 0 | 0 | 0 | 0 |
| 202204 | 1 | 0 | 0 | 0 | 0 |
| 202205 | 1 | 0 | 0 | 0 | 0 |
| 205206 | 1 | 0 | 0 | 0 | 0 |
| 205207 | 1 | 0 | 0 | 0 | 0 |
| 205208 | 1 | 0 | 0 | 0 | 0 |
| 208209 | 1 | 0 | 0 | 0 | 0 |
| 209210 | 1 | 0 | 0 | 0 | 0 |
| 209211 | 1 | 0 | 0 | 0 | 0 |
| 209212 | 1 | 0 | 0 | 0 | 0 |
| 212213 | 1 | 0 | 0 | 0 | 0 |
| 212214 | 1 | 0 | 0 | 0 | 0 |
| 212215 | 1 | 0 | 0 | 0 | 0 |
| 215216 | 1 | 0 | 0 | 0 | 0 |
| 215220 | 2 | 0 | 0 | 0 | 0 |
| 216217 | 1 | 0 | 0 | 0 | 0 |
| 217218 | 1 | 0 | 0 | 0 | 0 |
| 217219 | 1 | 0 | 0 | 0 | 0 |
| 217221 | 1 | 0 | 0 | 0 | 0 |
| 221222 | 1 | 0 | 0 | 0 | 0 |
| 221223 | 1 | 0 | 0 | 0 | 0 |
| 221239 | 1 | 0 | 0 | 0 | 0 |
| 224225 | 1 | 0 | 0 | 0 | 0 |
| 224226 | 1 | 0 | 0 | 0 | 0 |
| 224227 | 1 | 0 | 0 | 0 | 0 |
| 224239 | 1 | 0 | 0 | 0 | 0 |









|    |     |   |   |   |   |   |
|----|-----|---|---|---|---|---|
| 12 | 13  | 1 | 0 | 0 | 0 | 0 |
| 12 | 14  | 1 | 0 | 0 | 0 | 0 |
| 12 | 15  | 1 | 0 | 0 | 0 | 0 |
| 15 | 16  | 1 | 0 | 0 | 0 | 0 |
| 15 | 17  | 1 | 0 | 0 | 0 | 0 |
| 15 | 18  | 1 | 0 | 0 | 0 | 0 |
| 18 | 19  | 1 | 0 | 0 | 0 | 0 |
| 18 | 20  | 1 | 0 | 0 | 0 | 0 |
| 20 | 21  | 1 | 0 | 0 | 0 | 0 |
| 20 | 22  | 1 | 0 | 0 | 0 | 0 |
| 20 | 23  | 1 | 0 | 0 | 0 | 0 |
| 23 | 24  | 1 | 0 | 0 | 0 | 0 |
| 23 | 25  | 1 | 0 | 0 | 0 | 0 |
| 23 | 26  | 1 | 0 | 0 | 0 | 0 |
| 26 | 27  | 1 | 0 | 0 | 0 | 0 |
| 26 | 31  | 2 | 0 | 0 | 0 | 0 |
| 27 | 28  | 1 | 0 | 0 | 0 | 0 |
| 28 | 29  | 1 | 0 | 0 | 0 | 0 |
| 28 | 30  | 1 | 0 | 0 | 0 | 0 |
| 28 | 32  | 1 | 0 | 0 | 0 | 0 |
| 32 | 33  | 1 | 0 | 0 | 0 | 0 |
| 32 | 34  | 1 | 0 | 0 | 0 | 0 |
| 32 | 50  | 1 | 0 | 0 | 0 | 0 |
| 35 | 36  | 1 | 0 | 0 | 0 | 0 |
| 35 | 37  | 1 | 0 | 0 | 0 | 0 |
| 35 | 38  | 1 | 0 | 0 | 0 | 0 |
| 35 | 50  | 1 | 0 | 0 | 0 | 0 |
| 38 | 39  | 1 | 0 | 0 | 0 | 0 |
| 38 | 40  | 1 | 0 | 0 | 0 | 0 |
| 38 | 41  | 1 | 0 | 0 | 0 | 0 |
| 41 | 42  | 1 | 0 | 0 | 0 | 0 |
| 42 | 43  | 1 | 0 | 0 | 0 | 0 |
| 42 | 49  | 2 | 0 | 0 | 0 | 0 |
| 43 | 44  | 1 | 0 | 0 | 0 | 0 |
| 43 | 45  | 1 | 0 | 0 | 0 | 0 |
| 43 | 46  | 1 | 0 | 0 | 0 | 0 |
| 46 | 47  | 1 | 0 | 0 | 0 | 0 |
| 46 | 48  | 1 | 0 | 0 | 0 | 0 |
| 46 | 70  | 1 | 0 | 0 | 0 | 0 |
| 50 | 51  | 1 | 0 | 0 | 0 | 0 |
| 50 | 52  | 1 | 0 | 0 | 0 | 0 |
| 53 | 54  | 1 | 0 | 0 | 0 | 0 |
| 53 | 55  | 1 | 0 | 0 | 0 | 0 |
| 55 | 56  | 1 | 0 | 0 | 0 | 0 |
| 55 | 57  | 1 | 0 | 0 | 0 | 0 |
| 55 | 58  | 1 | 0 | 0 | 0 | 0 |
| 58 | 59  | 1 | 0 | 0 | 0 | 0 |
| 58 | 60  | 1 | 0 | 0 | 0 | 0 |
| 58 | 61  | 1 | 0 | 0 | 0 | 0 |
| 61 | 62  | 1 | 0 | 0 | 0 | 0 |
| 61 | 63  | 1 | 0 | 0 | 0 | 0 |
| 61 | 64  | 1 | 0 | 0 | 0 | 0 |
| 64 | 65  | 1 | 0 | 0 | 0 | 0 |
| 64 | 66  | 1 | 0 | 0 | 0 | 0 |
| 64 | 67  | 1 | 0 | 0 | 0 | 0 |
| 67 | 68  | 1 | 0 | 0 | 0 | 0 |
| 67 | 69  | 1 | 0 | 0 | 0 | 0 |
| 67 | 70  | 1 | 0 | 0 | 0 | 0 |
| 70 | 71  | 1 | 0 | 0 | 0 | 0 |
| 71 | 72  | 1 | 0 | 0 | 0 | 0 |
| 71 | 73  | 1 | 0 | 0 | 0 | 0 |
| 71 | 74  | 1 | 0 | 0 | 0 | 0 |
| 74 | 75  | 1 | 0 | 0 | 0 | 0 |
| 74 | 76  | 1 | 0 | 0 | 0 | 0 |
| 74 | 77  | 1 | 0 | 0 | 0 | 0 |
| 77 | 78  | 1 | 0 | 0 | 0 | 0 |
| 77 | 82  | 2 | 0 | 0 | 0 | 0 |
| 78 | 79  | 1 | 0 | 0 | 0 | 0 |
| 79 | 80  | 1 | 0 | 0 | 0 | 0 |
| 79 | 81  | 1 | 0 | 0 | 0 | 0 |
| 79 | 83  | 1 | 0 | 0 | 0 | 0 |
| 83 | 84  | 1 | 0 | 0 | 0 | 0 |
| 83 | 85  | 1 | 0 | 0 | 0 | 0 |
| 83 | 101 | 1 | 0 | 0 | 0 | 0 |
| 86 | 87  | 1 | 0 | 0 | 0 | 0 |
| 86 | 88  | 1 | 0 | 0 | 0 | 0 |
| 86 | 89  | 1 | 0 | 0 | 0 | 0 |
| 86 | 101 | 1 | 0 | 0 | 0 | 0 |
| 89 | 90  | 1 | 0 | 0 | 0 | 0 |
| 89 | 91  | 1 | 0 | 0 | 0 | 0 |
| 89 | 92  | 1 | 0 | 0 | 0 | 0 |

|     |     |   |   |   |   |   |
|-----|-----|---|---|---|---|---|
| 92  | 93  | 1 | 0 | 0 | 0 | 0 |
| 93  | 94  | 1 | 0 | 0 | 0 | 0 |
| 93  | 100 | 2 | 0 | 0 | 0 | 0 |
| 94  | 95  | 1 | 0 | 0 | 0 | 0 |
| 94  | 96  | 1 | 0 | 0 | 0 | 0 |
| 94  | 97  | 1 | 0 | 0 | 0 | 0 |
| 97  | 98  | 1 | 0 | 0 | 0 | 0 |
| 97  | 99  | 1 | 0 | 0 | 0 | 0 |
| 97  | 121 | 1 | 0 | 0 | 0 | 0 |
| 101 | 102 | 1 | 0 | 0 | 0 | 0 |
| 101 | 103 | 1 | 0 | 0 | 0 | 0 |
| 104 | 105 | 1 | 0 | 0 | 0 | 0 |
| 104 | 106 | 1 | 0 | 0 | 0 | 0 |
| 106 | 107 | 1 | 0 | 0 | 0 | 0 |
| 106 | 108 | 1 | 0 | 0 | 0 | 0 |
| 106 | 109 | 1 | 0 | 0 | 0 | 0 |
| 109 | 110 | 1 | 0 | 0 | 0 | 0 |
| 109 | 111 | 1 | 0 | 0 | 0 | 0 |
| 109 | 112 | 1 | 0 | 0 | 0 | 0 |
| 112 | 113 | 1 | 0 | 0 | 0 | 0 |
| 112 | 114 | 1 | 0 | 0 | 0 | 0 |
| 112 | 115 | 1 | 0 | 0 | 0 | 0 |
| 115 | 116 | 1 | 0 | 0 | 0 | 0 |
| 115 | 117 | 1 | 0 | 0 | 0 | 0 |
| 115 | 118 | 1 | 0 | 0 | 0 | 0 |
| 118 | 119 | 1 | 0 | 0 | 0 | 0 |
| 118 | 120 | 1 | 0 | 0 | 0 | 0 |
| 118 | 121 | 1 | 0 | 0 | 0 | 0 |
| 121 | 122 | 1 | 0 | 0 | 0 | 0 |
| 122 | 123 | 1 | 0 | 0 | 0 | 0 |
| 122 | 124 | 1 | 0 | 0 | 0 | 0 |
| 122 | 125 | 1 | 0 | 0 | 0 | 0 |
| 125 | 126 | 1 | 0 | 0 | 0 | 0 |
| 125 | 127 | 1 | 0 | 0 | 0 | 0 |
| 125 | 128 | 1 | 0 | 0 | 0 | 0 |
| 128 | 129 | 1 | 0 | 0 | 0 | 0 |
| 128 | 133 | 2 | 0 | 0 | 0 | 0 |
| 129 | 130 | 1 | 0 | 0 | 0 | 0 |
| 130 | 131 | 1 | 0 | 0 | 0 | 0 |
| 130 | 132 | 1 | 0 | 0 | 0 | 0 |
| 130 | 134 | 1 | 0 | 0 | 0 | 0 |
| 134 | 135 | 1 | 0 | 0 | 0 | 0 |
| 134 | 136 | 1 | 0 | 0 | 0 | 0 |
| 134 | 152 | 1 | 0 | 0 | 0 | 0 |
| 137 | 138 | 1 | 0 | 0 | 0 | 0 |
| 137 | 139 | 1 | 0 | 0 | 0 | 0 |
| 137 | 140 | 1 | 0 | 0 | 0 | 0 |
| 137 | 152 | 1 | 0 | 0 | 0 | 0 |
| 140 | 141 | 1 | 0 | 0 | 0 | 0 |
| 140 | 142 | 1 | 0 | 0 | 0 | 0 |
| 140 | 143 | 1 | 0 | 0 | 0 | 0 |
| 143 | 144 | 1 | 0 | 0 | 0 | 0 |
| 144 | 145 | 1 | 0 | 0 | 0 | 0 |
| 144 | 151 | 2 | 0 | 0 | 0 | 0 |
| 145 | 146 | 1 | 0 | 0 | 0 | 0 |
| 145 | 147 | 1 | 0 | 0 | 0 | 0 |
| 145 | 148 | 1 | 0 | 0 | 0 | 0 |
| 148 | 149 | 1 | 0 | 0 | 0 | 0 |
| 148 | 150 | 1 | 0 | 0 | 0 | 0 |
| 148 | 172 | 1 | 0 | 0 | 0 | 0 |
| 152 | 153 | 1 | 0 | 0 | 0 | 0 |
| 152 | 154 | 1 | 0 | 0 | 0 | 0 |
| 155 | 156 | 1 | 0 | 0 | 0 | 0 |
| 155 | 157 | 1 | 0 | 0 | 0 | 0 |
| 157 | 158 | 1 | 0 | 0 | 0 | 0 |
| 157 | 159 | 1 | 0 | 0 | 0 | 0 |
| 157 | 160 | 1 | 0 | 0 | 0 | 0 |
| 160 | 161 | 1 | 0 | 0 | 0 | 0 |
| 160 | 162 | 1 | 0 | 0 | 0 | 0 |
| 160 | 163 | 1 | 0 | 0 | 0 | 0 |
| 163 | 164 | 1 | 0 | 0 | 0 | 0 |
| 163 | 165 | 1 | 0 | 0 | 0 | 0 |
| 163 | 166 | 1 | 0 | 0 | 0 | 0 |
| 166 | 167 | 1 | 0 | 0 | 0 | 0 |
| 166 | 168 | 1 | 0 | 0 | 0 | 0 |
| 166 | 169 | 1 | 0 | 0 | 0 | 0 |
| 169 | 170 | 1 | 0 | 0 | 0 | 0 |
| 169 | 171 | 1 | 0 | 0 | 0 | 0 |
| 169 | 172 | 1 | 0 | 0 | 0 | 0 |
| 172 | 173 | 1 | 0 | 0 | 0 | 0 |
| 173 | 174 | 1 | 0 | 0 | 0 | 0 |

|        |   |   |   |   |   |
|--------|---|---|---|---|---|
| 173175 | 1 | 0 | 0 | 0 | 0 |
| 173176 | 1 | 0 | 0 | 0 | 0 |
| 176177 | 1 | 0 | 0 | 0 | 0 |
| 176178 | 1 | 0 | 0 | 0 | 0 |
| 176179 | 1 | 0 | 0 | 0 | 0 |
| 179180 | 1 | 0 | 0 | 0 | 0 |
| 179184 | 2 | 0 | 0 | 0 | 0 |
| 180181 | 1 | 0 | 0 | 0 | 0 |
| 181182 | 1 | 0 | 0 | 0 | 0 |
| 181183 | 1 | 0 | 0 | 0 | 0 |
| 181185 | 1 | 0 | 0 | 0 | 0 |
| 185186 | 1 | 0 | 0 | 0 | 0 |
| 185187 | 1 | 0 | 0 | 0 | 0 |
| 185203 | 1 | 0 | 0 | 0 | 0 |
| 188189 | 1 | 0 | 0 | 0 | 0 |
| 188190 | 1 | 0 | 0 | 0 | 0 |
| 188191 | 1 | 0 | 0 | 0 | 0 |
| 188203 | 1 | 0 | 0 | 0 | 0 |
| 191192 | 1 | 0 | 0 | 0 | 0 |
| 191193 | 1 | 0 | 0 | 0 | 0 |
| 191194 | 1 | 0 | 0 | 0 | 0 |
| 194195 | 1 | 0 | 0 | 0 | 0 |
| 195196 | 1 | 0 | 0 | 0 | 0 |
| 195202 | 2 | 0 | 0 | 0 | 0 |
| 196197 | 1 | 0 | 0 | 0 | 0 |
| 196198 | 1 | 0 | 0 | 0 | 0 |
| 196199 | 1 | 0 | 0 | 0 | 0 |
| 199200 | 1 | 0 | 0 | 0 | 0 |
| 199201 | 1 | 0 | 0 | 0 | 0 |
| 199223 | 1 | 0 | 0 | 0 | 0 |
| 203204 | 1 | 0 | 0 | 0 | 0 |
| 203205 | 1 | 0 | 0 | 0 | 0 |
| 206207 | 1 | 0 | 0 | 0 | 0 |
| 206208 | 1 | 0 | 0 | 0 | 0 |
| 208209 | 1 | 0 | 0 | 0 | 0 |
| 208210 | 1 | 0 | 0 | 0 | 0 |
| 208211 | 1 | 0 | 0 | 0 | 0 |
| 211212 | 1 | 0 | 0 | 0 | 0 |
| 211213 | 1 | 0 | 0 | 0 | 0 |
| 211214 | 1 | 0 | 0 | 0 | 0 |
| 214215 | 1 | 0 | 0 | 0 | 0 |
| 214216 | 1 | 0 | 0 | 0 | 0 |
| 214217 | 1 | 0 | 0 | 0 | 0 |
| 217218 | 1 | 0 | 0 | 0 | 0 |
| 217219 | 1 | 0 | 0 | 0 | 0 |
| 217220 | 1 | 0 | 0 | 0 | 0 |
| 220221 | 1 | 0 | 0 | 0 | 0 |
| 220222 | 1 | 0 | 0 | 0 | 0 |
| 220223 | 1 | 0 | 0 | 0 | 0 |
| 223224 | 1 | 0 | 0 | 0 | 0 |
| 224225 | 1 | 0 | 0 | 0 | 0 |
| 224226 | 1 | 0 | 0 | 0 | 0 |
| 224227 | 1 | 0 | 0 | 0 | 0 |
| 227228 | 1 | 0 | 0 | 0 | 0 |
| 227229 | 1 | 0 | 0 | 0 | 0 |
| 227230 | 1 | 0 | 0 | 0 | 0 |
| 230231 | 1 | 0 | 0 | 0 | 0 |
| 230235 | 2 | 0 | 0 | 0 | 0 |
| 231232 | 1 | 0 | 0 | 0 | 0 |
| 232233 | 1 | 0 | 0 | 0 | 0 |
| 232234 | 1 | 0 | 0 | 0 | 0 |
| 232236 | 1 | 0 | 0 | 0 | 0 |
| 236237 | 1 | 0 | 0 | 0 | 0 |
| 236238 | 1 | 0 | 0 | 0 | 0 |
| 236254 | 1 | 0 | 0 | 0 | 0 |
| 239240 | 1 | 0 | 0 | 0 | 0 |
| 239241 | 1 | 0 | 0 | 0 | 0 |
| 239242 | 1 | 0 | 0 | 0 | 0 |
| 239254 | 1 | 0 | 0 | 0 | 0 |
| 242243 | 1 | 0 | 0 | 0 | 0 |
| 242244 | 1 | 0 | 0 | 0 | 0 |
| 242245 | 1 | 0 | 0 | 0 | 0 |
| 245246 | 1 | 0 | 0 | 0 | 0 |
| 246247 | 1 | 0 | 0 | 0 | 0 |
| 246253 | 2 | 0 | 0 | 0 | 0 |
| 247248 | 1 | 0 | 0 | 0 | 0 |
| 247249 | 1 | 0 | 0 | 0 | 0 |
| 247250 | 1 | 0 | 0 | 0 | 0 |
| 250251 | 1 | 0 | 0 | 0 | 0 |
| 250252 | 1 | 0 | 0 | 0 | 0 |
| 250274 | 1 | 0 | 0 | 0 | 0 |



```

254255 1 0 0 0 0
254256 1 0 0 0 0
257258 1 0 0 0 0
257259 1 0 0 0 0
259260 1 0 0 0 0
259261 1 0 0 0 0
259262 1 0 0 0 0
262263 1 0 0 0 0
262264 1 0 0 0 0
262265 1 0 0 0 0
265266 1 0 0 0 0
265267 1 0 0 0 0
265268 1 0 0 0 0
268269 1 0 0 0 0
268270 1 0 0 0 0
268271 1 0 0 0 0
271272 1 0 0 0 0
271273 1 0 0 0 0
271274 1 0 0 0 0
274275 1 0 0 0 0

```

```

M END
> <NAME>
JJ32_12

```

```

$$$$
JJ36_12
MOE2012 3D

```

```

293292 0 0 1 0 0 0 0 0999 V2000
25.3350 -25.7330 -11.0930 O 0 0 0 0 0 0 0 0 0 0 0 0 0 0 0 0
26.0840 -25.9170 -10.5010 H 0 0 0 0 0 0 0 0 0 0 0 0 0 0 0 0
24.7060 -24.5520 -10.6120 C 0 0 0 0 0 0 0 0 0 0 0 0 0 0 0 0
24.3760 -24.7280 -9.5830 H 0 0 0 0 0 0 0 0 0 0 0 0 0 0 0 0
25.4420 -23.7410 -10.6150 H 0 0 0 0 0 0 0 0 0 0 0 0 0 0 0 0
23.5250 -24.2170 -11.5120 C 0 0 0 0 0 0 0 0 0 0 0 0 0 0 0 0
23.8760 -24.0980 -12.5440 H 0 0 0 0 0 0 0 0 0 0 0 0 0 0 0 0
22.8280 -25.0650 -11.5280 H 0 0 0 0 0 0 0 0 0 0 0 0 0 0 0 0
22.8060 -22.9510 -11.0490 C 0 0 0 0 0 0 0 0 0 0 0 0 0 0 0 0
22.4560 -23.0840 -10.0180 H 0 0 0 0 0 0 0 0 0 0 0 0 0 0 0 0
23.5120 -22.1100 -11.0430 H 0 0 0 0 0 0 0 0 0 0 0 0 0 0 0 0
21.6180 -22.6150 -11.9530 C 0 0 0 0 0 0 0 0 0 0 0 0 0 0 0 0
21.9670 -22.4800 -12.9840 H 0 0 0 0 0 0 0 0 0 0 0 0 0 0 0 0
20.9110 -23.4540 -11.9570 H 0 0 0 0 0 0 0 0 0 0 0 0 0 0 0 0
20.9040 -21.3440 -11.4820 C 0 0 0 0 0 0 0 0 0 0 0 0 0 0 0 0
20.5610 -21.4830 -10.4490 H 0 0 0 0 0 0 0 0 0 0 0 0 0 0 0 0
21.6220 -20.5160 -11.4750 H 0 0 0 0 0 0 0 0 0 0 0 0 0 0 0 0
19.7100 -21.0080 -12.3820 C 0 0 0 0 0 0 0 0 0 0 0 0 0 0 0 0
20.0320 -20.8660 -13.4210 H 0 0 0 0 0 0 0 0 0 0 0 0 0 0 0 0
19.0240 -21.8630 -12.3880 H 0 0 0 0 0 0 0 0 0 0 0 0 0 0 0 0
18.9490 -19.8460 -11.9150 N 0 0 0 3 0 0 0 0 0 0 0 0 0 0 0 0
18.8240 -19.9160 -10.8990 H 0 0 0 0 0 0 0 0 0 0 0 0 0 0 0 0
19.6150 -18.5750 -12.2130 C 0 0 0 0 0 0 0 0 0 0 0 0 0 0 0 0
20.6020 -18.5270 -11.7390 H 0 0 0 0 0 0 0 0 0 0 0 0 0 0 0 0
19.7570 -18.4840 -13.2960 H 0 0 0 0 0 0 0 0 0 0 0 0 0 0 0 0
18.7680 -17.3940 -11.7390 C 0 0 0 0 0 0 0 0 0 0 0 0 0 0 0 0
19.2240 -16.4700 -12.1150 H 0 0 0 0 0 0 0 0 0 0 0 0 0 0 0 0
17.7470 -17.4640 -12.1310 H 0 0 0 0 0 0 0 0 0 0 0 0 0 0 0 0
18.7050 -17.3020 -10.2330 C 0 0 0 0 0 0 0 0 0 0 0 0 0 0 0 0
18.1620 -16.1040 -9.8740 O 0 0 0 0 0 0 0 0 0 0 0 0 0 0 0 0
18.0340 -15.8990 -8.4580 C 0 0 0 0 0 0 0 0 0 0 0 0 0 0 0 0
17.3890 -16.6780 -8.0350 H 0 0 0 0 0 0 0 0 0 0 0 0 0 0 0 0
19.0250 -15.9490 -7.9920 H 0 0 0 0 0 0 0 0 0 0 0 0 0 0 0 0
19.0680 -18.1790 -9.4590 O 0 0 0 0 0 0 0 0 0 0 0 0 0 0 0 0
17.4150 -14.5230 -8.2360 C 0 0 0 0 0 0 0 0 0 0 0 0 0 0 0 0
18.0520 -13.7600 -8.7020 H 0 0 0 0 0 0 0 0 0 0 0 0 0 0 0 0
16.4530 -14.4710 -8.7600 H 0 0 0 0 0 0 0 0 0 0 0 0 0 0 0 0
16.5980 -12.8360 -6.5460 C 0 0 0 0 0 0 0 0 0 0 0 0 0 0 0 0
15.6370 -12.7750 -7.0730 H 0 0 0 0 0 0 0 0 0 0 0 0 0 0 0 0
17.2330 -12.0600 -6.9920 H 0 0 0 0 0 0 0 0 0 0 0 0 0 0 0 0
16.3810 -12.5210 -5.0690 C 0 0 0 0 0 0 0 0 0 0 0 0 0 0 0 0
15.7140 -13.2660 -4.6200 H 0 0 0 0 0 0 0 0 0 0 0 0 0 0 0 0
17.3390 -12.5170 -4.5370 H 0 0 0 0 0 0 0 0 0 0 0 0 0 0 0 0
15.7810 -11.2200 -4.9760 O 0 0 0 0 0 0 0 0 0 0 0 0 0 0 0 0
15.4770 -10.8210 -3.7080 C 0 0 0 0 0 0 0 0 0 0 0 0 0 0 0 0
14.8420 -9.4520 -3.7410 C 0 0 0 0 0 0 0 0 0 0 0 0 0 0 0 0
15.1280 -8.9310 -4.6610 H 0 0 0 0 0 0 0 0 0 0 0 0 0 0 0 0
13.7580 -9.6140 -3.7850 H 0 0 0 0 0 0 0 0 0 0 0 0 0 0 0 0
15.1830 -8.6130 -2.5040 C 0 0 0 0 0 0 0 0 0 0 0 0 0 0 0 0
14.3320 -7.9490 -2.2960 H 0 0 0 0 0 0 0 0 0 0 0 0 0 0 0 0
15.2580 -9.2480 -1.6120 H 0 0 0 0 0 0 0 0 0 0 0 0 0 0 0 0
15.6570 -11.4830 -2.6950 O 0 0 0 0 0 0 0 0 0 0 0 0 0 0 0 0

```







|    |    |   |   |   |   |   |
|----|----|---|---|---|---|---|
| 3  | 4  | 1 | 0 | 0 | 0 | 0 |
| 3  | 5  | 1 | 0 | 0 | 0 | 0 |
| 3  | 6  | 1 | 0 | 0 | 0 | 0 |
| 6  | 7  | 1 | 0 | 0 | 0 | 0 |
| 6  | 8  | 1 | 0 | 0 | 0 | 0 |
| 6  | 9  | 1 | 0 | 0 | 0 | 0 |
| 9  | 10 | 1 | 0 | 0 | 0 | 0 |
| 9  | 11 | 1 | 0 | 0 | 0 | 0 |
| 9  | 12 | 1 | 0 | 0 | 0 | 0 |
| 12 | 13 | 1 | 0 | 0 | 0 | 0 |
| 12 | 14 | 1 | 0 | 0 | 0 | 0 |
| 12 | 15 | 1 | 0 | 0 | 0 | 0 |
| 15 | 16 | 1 | 0 | 0 | 0 | 0 |
| 15 | 17 | 1 | 0 | 0 | 0 | 0 |
| 15 | 18 | 1 | 0 | 0 | 0 | 0 |
| 18 | 19 | 1 | 0 | 0 | 0 | 0 |
| 18 | 20 | 1 | 0 | 0 | 0 | 0 |
| 18 | 21 | 1 | 0 | 0 | 0 | 0 |
| 21 | 22 | 1 | 0 | 0 | 0 | 0 |
| 21 | 23 | 1 | 0 | 0 | 0 | 0 |
| 23 | 24 | 1 | 0 | 0 | 0 | 0 |
| 23 | 25 | 1 | 0 | 0 | 0 | 0 |
| 23 | 26 | 1 | 0 | 0 | 0 | 0 |
| 26 | 27 | 1 | 0 | 0 | 0 | 0 |
| 26 | 28 | 1 | 0 | 0 | 0 | 0 |
| 26 | 29 | 1 | 0 | 0 | 0 | 0 |
| 29 | 30 | 1 | 0 | 0 | 0 | 0 |
| 29 | 34 | 2 | 0 | 0 | 0 | 0 |
| 30 | 31 | 1 | 0 | 0 | 0 | 0 |
| 31 | 32 | 1 | 0 | 0 | 0 | 0 |
| 31 | 33 | 1 | 0 | 0 | 0 | 0 |
| 31 | 35 | 1 | 0 | 0 | 0 | 0 |
| 35 | 36 | 1 | 0 | 0 | 0 | 0 |
| 35 | 37 | 1 | 0 | 0 | 0 | 0 |
| 35 | 53 | 1 | 0 | 0 | 0 | 0 |
| 38 | 39 | 1 | 0 | 0 | 0 | 0 |
| 38 | 40 | 1 | 0 | 0 | 0 | 0 |
| 38 | 41 | 1 | 0 | 0 | 0 | 0 |
| 38 | 53 | 1 | 0 | 0 | 0 | 0 |
| 41 | 42 | 1 | 0 | 0 | 0 | 0 |
| 41 | 43 | 1 | 0 | 0 | 0 | 0 |
| 41 | 44 | 1 | 0 | 0 | 0 | 0 |
| 44 | 45 | 1 | 0 | 0 | 0 | 0 |
| 45 | 46 | 1 | 0 | 0 | 0 | 0 |
| 45 | 52 | 2 | 0 | 0 | 0 | 0 |
| 46 | 47 | 1 | 0 | 0 | 0 | 0 |
| 46 | 48 | 1 | 0 | 0 | 0 | 0 |
| 46 | 49 | 1 | 0 | 0 | 0 | 0 |
| 49 | 50 | 1 | 0 | 0 | 0 | 0 |
| 49 | 51 | 1 | 0 | 0 | 0 | 0 |
| 49 | 76 | 1 | 0 | 0 | 0 | 0 |
| 53 | 54 | 1 | 0 | 0 | 0 | 0 |
| 53 | 55 | 1 | 0 | 0 | 0 | 0 |
| 56 | 57 | 1 | 0 | 0 | 0 | 0 |
| 56 | 58 | 1 | 0 | 0 | 0 | 0 |
| 58 | 59 | 1 | 0 | 0 | 0 | 0 |
| 58 | 60 | 1 | 0 | 0 | 0 | 0 |
| 58 | 61 | 1 | 0 | 0 | 0 | 0 |
| 61 | 62 | 1 | 0 | 0 | 0 | 0 |
| 61 | 63 | 1 | 0 | 0 | 0 | 0 |
| 61 | 64 | 1 | 0 | 0 | 0 | 0 |
| 64 | 65 | 1 | 0 | 0 | 0 | 0 |
| 64 | 66 | 1 | 0 | 0 | 0 | 0 |
| 64 | 67 | 1 | 0 | 0 | 0 | 0 |
| 67 | 68 | 1 | 0 | 0 | 0 | 0 |
| 67 | 69 | 1 | 0 | 0 | 0 | 0 |
| 67 | 70 | 1 | 0 | 0 | 0 | 0 |
| 70 | 71 | 1 | 0 | 0 | 0 | 0 |
| 70 | 72 | 1 | 0 | 0 | 0 | 0 |
| 70 | 73 | 1 | 0 | 0 | 0 | 0 |
| 73 | 74 | 1 | 0 | 0 | 0 | 0 |
| 73 | 75 | 1 | 0 | 0 | 0 | 0 |
| 73 | 76 | 1 | 0 | 0 | 0 | 0 |
| 76 | 77 | 1 | 0 | 0 | 0 | 0 |
| 77 | 78 | 1 | 0 | 0 | 0 | 0 |
| 77 | 79 | 1 | 0 | 0 | 0 | 0 |
| 77 | 80 | 1 | 0 | 0 | 0 | 0 |
| 80 | 81 | 1 | 0 | 0 | 0 | 0 |
| 80 | 82 | 1 | 0 | 0 | 0 | 0 |
| 80 | 83 | 1 | 0 | 0 | 0 | 0 |
| 83 | 84 | 1 | 0 | 0 | 0 | 0 |

|     |     |   |   |   |   |   |
|-----|-----|---|---|---|---|---|
| 83  | 88  | 2 | 0 | 0 | 0 | 0 |
| 84  | 85  | 1 | 0 | 0 | 0 | 0 |
| 85  | 86  | 1 | 0 | 0 | 0 | 0 |
| 85  | 87  | 1 | 0 | 0 | 0 | 0 |
| 85  | 89  | 1 | 0 | 0 | 0 | 0 |
| 89  | 90  | 1 | 0 | 0 | 0 | 0 |
| 89  | 91  | 1 | 0 | 0 | 0 | 0 |
| 89  | 107 | 1 | 0 | 0 | 0 | 0 |
| 92  | 93  | 1 | 0 | 0 | 0 | 0 |
| 92  | 94  | 1 | 0 | 0 | 0 | 0 |
| 92  | 95  | 1 | 0 | 0 | 0 | 0 |
| 92  | 107 | 1 | 0 | 0 | 0 | 0 |
| 95  | 96  | 1 | 0 | 0 | 0 | 0 |
| 95  | 97  | 1 | 0 | 0 | 0 | 0 |
| 95  | 98  | 1 | 0 | 0 | 0 | 0 |
| 98  | 99  | 1 | 0 | 0 | 0 | 0 |
| 99  | 100 | 1 | 0 | 0 | 0 | 0 |
| 99  | 106 | 2 | 0 | 0 | 0 | 0 |
| 100 | 101 | 1 | 0 | 0 | 0 | 0 |
| 100 | 102 | 1 | 0 | 0 | 0 | 0 |
| 100 | 103 | 1 | 0 | 0 | 0 | 0 |
| 103 | 104 | 1 | 0 | 0 | 0 | 0 |
| 103 | 105 | 1 | 0 | 0 | 0 | 0 |
| 103 | 130 | 1 | 0 | 0 | 0 | 0 |
| 107 | 108 | 1 | 0 | 0 | 0 | 0 |
| 107 | 109 | 1 | 0 | 0 | 0 | 0 |
| 110 | 111 | 1 | 0 | 0 | 0 | 0 |
| 110 | 112 | 1 | 0 | 0 | 0 | 0 |
| 112 | 113 | 1 | 0 | 0 | 0 | 0 |
| 112 | 114 | 1 | 0 | 0 | 0 | 0 |
| 112 | 115 | 1 | 0 | 0 | 0 | 0 |
| 115 | 116 | 1 | 0 | 0 | 0 | 0 |
| 115 | 117 | 1 | 0 | 0 | 0 | 0 |
| 115 | 118 | 1 | 0 | 0 | 0 | 0 |
| 118 | 119 | 1 | 0 | 0 | 0 | 0 |
| 118 | 120 | 1 | 0 | 0 | 0 | 0 |
| 118 | 121 | 1 | 0 | 0 | 0 | 0 |
| 121 | 122 | 1 | 0 | 0 | 0 | 0 |
| 121 | 123 | 1 | 0 | 0 | 0 | 0 |
| 121 | 124 | 1 | 0 | 0 | 0 | 0 |
| 124 | 125 | 1 | 0 | 0 | 0 | 0 |
| 124 | 126 | 1 | 0 | 0 | 0 | 0 |
| 124 | 127 | 1 | 0 | 0 | 0 | 0 |
| 127 | 128 | 1 | 0 | 0 | 0 | 0 |
| 127 | 129 | 1 | 0 | 0 | 0 | 0 |
| 127 | 130 | 1 | 0 | 0 | 0 | 0 |
| 130 | 131 | 1 | 0 | 0 | 0 | 0 |
| 131 | 132 | 1 | 0 | 0 | 0 | 0 |
| 131 | 133 | 1 | 0 | 0 | 0 | 0 |
| 131 | 134 | 1 | 0 | 0 | 0 | 0 |
| 134 | 135 | 1 | 0 | 0 | 0 | 0 |
| 134 | 136 | 1 | 0 | 0 | 0 | 0 |
| 134 | 137 | 1 | 0 | 0 | 0 | 0 |
| 137 | 138 | 1 | 0 | 0 | 0 | 0 |
| 137 | 142 | 2 | 0 | 0 | 0 | 0 |
| 138 | 139 | 1 | 0 | 0 | 0 | 0 |
| 139 | 140 | 1 | 0 | 0 | 0 | 0 |
| 139 | 141 | 1 | 0 | 0 | 0 | 0 |
| 139 | 143 | 1 | 0 | 0 | 0 | 0 |
| 143 | 144 | 1 | 0 | 0 | 0 | 0 |
| 143 | 145 | 1 | 0 | 0 | 0 | 0 |
| 143 | 161 | 1 | 0 | 0 | 0 | 0 |
| 146 | 147 | 1 | 0 | 0 | 0 | 0 |
| 146 | 148 | 1 | 0 | 0 | 0 | 0 |
| 146 | 149 | 1 | 0 | 0 | 0 | 0 |
| 146 | 161 | 1 | 0 | 0 | 0 | 0 |
| 149 | 150 | 1 | 0 | 0 | 0 | 0 |
| 149 | 151 | 1 | 0 | 0 | 0 | 0 |
| 149 | 152 | 1 | 0 | 0 | 0 | 0 |
| 152 | 153 | 1 | 0 | 0 | 0 | 0 |
| 153 | 154 | 1 | 0 | 0 | 0 | 0 |
| 153 | 160 | 2 | 0 | 0 | 0 | 0 |
| 154 | 155 | 1 | 0 | 0 | 0 | 0 |
| 154 | 156 | 1 | 0 | 0 | 0 | 0 |
| 154 | 157 | 1 | 0 | 0 | 0 | 0 |
| 157 | 158 | 1 | 0 | 0 | 0 | 0 |
| 157 | 159 | 1 | 0 | 0 | 0 | 0 |
| 157 | 184 | 1 | 0 | 0 | 0 | 0 |
| 161 | 162 | 1 | 0 | 0 | 0 | 0 |
| 161 | 163 | 1 | 0 | 0 | 0 | 0 |
| 164 | 165 | 1 | 0 | 0 | 0 | 0 |

|        |   |   |   |   |   |
|--------|---|---|---|---|---|
| 164166 | 1 | 0 | 0 | 0 | 0 |
| 166167 | 1 | 0 | 0 | 0 | 0 |
| 166168 | 1 | 0 | 0 | 0 | 0 |
| 166169 | 1 | 0 | 0 | 0 | 0 |
| 169170 | 1 | 0 | 0 | 0 | 0 |
| 169171 | 1 | 0 | 0 | 0 | 0 |
| 169172 | 1 | 0 | 0 | 0 | 0 |
| 172173 | 1 | 0 | 0 | 0 | 0 |
| 172174 | 1 | 0 | 0 | 0 | 0 |
| 172175 | 1 | 0 | 0 | 0 | 0 |
| 175176 | 1 | 0 | 0 | 0 | 0 |
| 175177 | 1 | 0 | 0 | 0 | 0 |
| 175178 | 1 | 0 | 0 | 0 | 0 |
| 178179 | 1 | 0 | 0 | 0 | 0 |
| 178180 | 1 | 0 | 0 | 0 | 0 |
| 178181 | 1 | 0 | 0 | 0 | 0 |
| 181182 | 1 | 0 | 0 | 0 | 0 |
| 181183 | 1 | 0 | 0 | 0 | 0 |
| 181184 | 1 | 0 | 0 | 0 | 0 |
| 184185 | 1 | 0 | 0 | 0 | 0 |
| 185186 | 1 | 0 | 0 | 0 | 0 |
| 185187 | 1 | 0 | 0 | 0 | 0 |
| 185188 | 1 | 0 | 0 | 0 | 0 |
| 188189 | 1 | 0 | 0 | 0 | 0 |
| 188190 | 1 | 0 | 0 | 0 | 0 |
| 188191 | 1 | 0 | 0 | 0 | 0 |
| 191192 | 1 | 0 | 0 | 0 | 0 |
| 191196 | 2 | 0 | 0 | 0 | 0 |
| 192193 | 1 | 0 | 0 | 0 | 0 |
| 193194 | 1 | 0 | 0 | 0 | 0 |
| 193195 | 1 | 0 | 0 | 0 | 0 |
| 193197 | 1 | 0 | 0 | 0 | 0 |
| 197198 | 1 | 0 | 0 | 0 | 0 |
| 197199 | 1 | 0 | 0 | 0 | 0 |
| 197215 | 1 | 0 | 0 | 0 | 0 |
| 200201 | 1 | 0 | 0 | 0 | 0 |
| 200202 | 1 | 0 | 0 | 0 | 0 |
| 200203 | 1 | 0 | 0 | 0 | 0 |
| 200215 | 1 | 0 | 0 | 0 | 0 |
| 203204 | 1 | 0 | 0 | 0 | 0 |
| 203205 | 1 | 0 | 0 | 0 | 0 |
| 203206 | 1 | 0 | 0 | 0 | 0 |
| 206207 | 1 | 0 | 0 | 0 | 0 |
| 207208 | 1 | 0 | 0 | 0 | 0 |
| 207214 | 2 | 0 | 0 | 0 | 0 |
| 208209 | 1 | 0 | 0 | 0 | 0 |
| 208210 | 1 | 0 | 0 | 0 | 0 |
| 208211 | 1 | 0 | 0 | 0 | 0 |
| 211212 | 1 | 0 | 0 | 0 | 0 |
| 211213 | 1 | 0 | 0 | 0 | 0 |
| 211238 | 1 | 0 | 0 | 0 | 0 |
| 215216 | 1 | 0 | 0 | 0 | 0 |
| 215217 | 1 | 0 | 0 | 0 | 0 |
| 218219 | 1 | 0 | 0 | 0 | 0 |
| 218220 | 1 | 0 | 0 | 0 | 0 |
| 220221 | 1 | 0 | 0 | 0 | 0 |
| 220222 | 1 | 0 | 0 | 0 | 0 |
| 220223 | 1 | 0 | 0 | 0 | 0 |
| 223224 | 1 | 0 | 0 | 0 | 0 |
| 223225 | 1 | 0 | 0 | 0 | 0 |
| 223226 | 1 | 0 | 0 | 0 | 0 |
| 226227 | 1 | 0 | 0 | 0 | 0 |
| 226228 | 1 | 0 | 0 | 0 | 0 |
| 226229 | 1 | 0 | 0 | 0 | 0 |
| 229230 | 1 | 0 | 0 | 0 | 0 |
| 229231 | 1 | 0 | 0 | 0 | 0 |
| 229232 | 1 | 0 | 0 | 0 | 0 |
| 232233 | 1 | 0 | 0 | 0 | 0 |
| 232234 | 1 | 0 | 0 | 0 | 0 |
| 232235 | 1 | 0 | 0 | 0 | 0 |
| 235236 | 1 | 0 | 0 | 0 | 0 |
| 235237 | 1 | 0 | 0 | 0 | 0 |
| 235238 | 1 | 0 | 0 | 0 | 0 |
| 238239 | 1 | 0 | 0 | 0 | 0 |
| 239240 | 1 | 0 | 0 | 0 | 0 |
| 239241 | 1 | 0 | 0 | 0 | 0 |
| 239242 | 1 | 0 | 0 | 0 | 0 |
| 242243 | 1 | 0 | 0 | 0 | 0 |
| 242244 | 1 | 0 | 0 | 0 | 0 |
| 242245 | 1 | 0 | 0 | 0 | 0 |
| 245246 | 1 | 0 | 0 | 0 | 0 |

```

245250  2  0  0  0  0
246247  1  0  0  0  0
247248  1  0  0  0  0
247249  1  0  0  0  0
247251  1  0  0  0  0
251252  1  0  0  0  0
251253  1  0  0  0  0
251269  1  0  0  0  0
254255  1  0  0  0  0
254256  1  0  0  0  0
254257  1  0  0  0  0
254269  1  0  0  0  0
257258  1  0  0  0  0
257259  1  0  0  0  0
257260  1  0  0  0  0
260261  1  0  0  0  0
261262  1  0  0  0  0
261268  2  0  0  0  0
262263  1  0  0  0  0
262264  1  0  0  0  0
262265  1  0  0  0  0
265266  1  0  0  0  0
265267  1  0  0  0  0
265292  1  0  0  0  0
269270  1  0  0  0  0
269271  1  0  0  0  0
272273  1  0  0  0  0
272274  1  0  0  0  0
274275  1  0  0  0  0
274276  1  0  0  0  0
274277  1  0  0  0  0
277278  1  0  0  0  0
277279  1  0  0  0  0
277280  1  0  0  0  0
280281  1  0  0  0  0
280282  1  0  0  0  0
280283  1  0  0  0  0
283284  1  0  0  0  0
283285  1  0  0  0  0
283286  1  0  0  0  0
286287  1  0  0  0  0
286288  1  0  0  0  0
286289  1  0  0  0  0
289290  1  0  0  0  0
289291  1  0  0  0  0
289292  1  0  0  0  0
292293  1  0  0  0  0

```

```

M  END
>  <NAME>
JJ36_12

```

```

$$$$
JJ80_12
MOE2012          3D

```

```

281280  0  0  1  0  0  0  0  0999  V2000
 37.3470 -7.5050 -32.3740 C  0  0  0  0  0  0  0  0  0  0  0  0  0  0  0
 37.9780 -6.6170 -32.2560 H  0  0  0  0  0  0  0  0  0  0  0  0  0  0
 37.9480 -8.2980 -32.8330 H  0  0  0  0  0  0  0  0  0  0  0  0  0  0
 37.0680 -7.8660 -31.3780 H  0  0  0  0  0  0  0  0  0  0  0  0  0  0
 36.1510 -7.2320 -33.1780 N  0  0  0  0  0  0  0  0  0  0  0  0  0  0
 35.3240 -6.2070 -32.5130 C  0  0  0  0  0  0  0  0  0  0  0  0  0  0
 35.1600 -6.5100 -31.4710 H  0  0  0  0  0  0  0  0  0  0  0  0  0  0
 35.8540 -5.2470 -32.4870 H  0  0  0  0  0  0  0  0  0  0  0  0  0  0
 33.9440 -6.0400 -33.1660 C  0  0  0  0  0  0  0  0  0  0  0  0  0  0
 34.0410 -5.6100 -34.1690 H  0  0  0  0  0  0  0  0  0  0  0  0  0  0
 33.4800 -7.0280 -33.2870 H  0  0  0  0  0  0  0  0  0  0  0  0  0  0
 32.9890 -5.1680 -32.3410 C  0  0  0  0  0  0  0  0  0  0  0  0  0  0
 32.0060 -5.1930 -32.8270 H  0  0  0  0  0  0  0  0  0  0  0  0  0  0
 32.8750 -5.6040 -31.3430 H  0  0  0  0  0  0  0  0  0  0  0  0  0  0
 36.5490 -6.8270 -34.5280 C  0  0  0  0  0  0  0  0  0  0  0  0  0  0
 37.1930 -7.5880 -34.9840 H  0  0  0  0  0  0  0  0  0  0  0  0  0  0
 37.0910 -5.8740 -34.5320 H  0  0  0  0  0  0  0  0  0  0  0  0  0  0
 35.6800 -6.7370 -35.1880 H  0  0  0  0  0  0  0  0  0  0  0  0  0  0
 33.4590 -3.7860 -32.2570 N  0  0  3  0  0  0  0  0  0  0  0  0  0  0
 34.3330 -3.7430 -31.7200 H  0  0  0  0  0  0  0  0  0  0  0  0  0  0
 32.4940 -2.8870 -31.6150 C  0  0  0  0  0  0  0  0  0  0  0  0  0  0
 32.8600 -1.8640 -31.7650 H  0  0  0  0  0  0  0  0  0  0  0  0  0  0
 31.5310 -2.9430 -32.1350 H  0  0  0  0  0  0  0  0  0  0  0  0  0  0
 32.2830 -3.1140 -30.1160 C  0  0  0  0  0  0  0  0  0  0  0  0  0  0
 31.5510 -2.3760 -29.7660 H  0  0  0  0  0  0  0  0  0  0  0  0  0  0

```









|         |          |          |     |   |   |   |   |   |   |   |   |   |   |   |   |
|---------|----------|----------|-----|---|---|---|---|---|---|---|---|---|---|---|---|
| 60.8080 | -13.2920 | -9.2770  | H   | 0 | 0 | 0 | 0 | 0 | 0 | 0 | 0 | 0 | 0 | 0 | 0 |
| 60.9830 | -11.7160 | -10.7420 | C   | 0 | 0 | 0 | 0 | 0 | 0 | 0 | 0 | 0 | 0 | 0 | 0 |
| 60.6070 | -12.3130 | -11.5810 | H   | 0 | 0 | 0 | 0 | 0 | 0 | 0 | 0 | 0 | 0 | 0 | 0 |
| 60.6300 | -10.6910 | -10.8930 | H   | 0 | 0 | 0 | 0 | 0 | 0 | 0 | 0 | 0 | 0 | 0 | 0 |
| 62.5150 | -11.7500 | -10.7540 | C   | 0 | 0 | 0 | 0 | 0 | 0 | 0 | 0 | 0 | 0 | 0 | 0 |
| 62.9330 | -11.2310 | -9.8830  | H   | 0 | 0 | 0 | 0 | 0 | 0 | 0 | 0 | 0 | 0 | 0 | 0 |
| 62.8370 | -12.7960 | -10.6690 | H   | 0 | 0 | 0 | 0 | 0 | 0 | 0 | 0 | 0 | 0 | 0 | 0 |
| 58.4030 | -10.9320 | -9.2370  | C   | 0 | 0 | 0 | 0 | 0 | 0 | 0 | 0 | 0 | 0 | 0 | 0 |
| 57.3470 | -10.9780 | -8.9490  | H   | 0 | 0 | 0 | 0 | 0 | 0 | 0 | 0 | 0 | 0 | 0 | 0 |
| 58.4650 | -10.4340 | -10.2100 | H   | 0 | 0 | 0 | 0 | 0 | 0 | 0 | 0 | 0 | 0 | 0 | 0 |
| 58.9010 | -10.3010 | -8.4920  | H   | 0 | 0 | 0 | 0 | 0 | 0 | 0 | 0 | 0 | 0 | 0 | 0 |
| 63.0360 | -11.2160 | -12.0160 | N   | 0 | 0 | 3 | 0 | 0 | 0 | 0 | 0 | 0 | 0 | 0 | 0 |
| 63.7800 | -11.8340 | -12.3440 | H   | 0 | 0 | 0 | 0 | 0 | 0 | 0 | 0 | 0 | 0 | 0 | 0 |
| 1 2     | 1 0      | 0 0      | 0 0 |   |   |   |   |   |   |   |   |   |   |   |   |
| 1 3     | 1 0      | 0 0      | 0 0 |   |   |   |   |   |   |   |   |   |   |   |   |
| 1 4     | 1 0      | 0 0      | 0 0 |   |   |   |   |   |   |   |   |   |   |   |   |
| 1 5     | 1 0      | 0 0      | 0 0 |   |   |   |   |   |   |   |   |   |   |   |   |
| 5 6     | 1 0      | 0 0      | 0 0 |   |   |   |   |   |   |   |   |   |   |   |   |
| 5 15    | 1 0      | 0 0      | 0 0 |   |   |   |   |   |   |   |   |   |   |   |   |
| 6 7     | 1 0      | 0 0      | 0 0 |   |   |   |   |   |   |   |   |   |   |   |   |
| 6 8     | 1 0      | 0 0      | 0 0 |   |   |   |   |   |   |   |   |   |   |   |   |
| 6 9     | 1 0      | 0 0      | 0 0 |   |   |   |   |   |   |   |   |   |   |   |   |
| 9 10    | 1 0      | 0 0      | 0 0 |   |   |   |   |   |   |   |   |   |   |   |   |
| 9 11    | 1 0      | 0 0      | 0 0 |   |   |   |   |   |   |   |   |   |   |   |   |
| 9 12    | 1 0      | 0 0      | 0 0 |   |   |   |   |   |   |   |   |   |   |   |   |
| 12 13   | 1 0      | 0 0      | 0 0 |   |   |   |   |   |   |   |   |   |   |   |   |
| 12 14   | 1 0      | 0 0      | 0 0 |   |   |   |   |   |   |   |   |   |   |   |   |
| 12 19   | 1 0      | 0 0      | 0 0 |   |   |   |   |   |   |   |   |   |   |   |   |
| 15 16   | 1 0      | 0 0      | 0 0 |   |   |   |   |   |   |   |   |   |   |   |   |
| 15 17   | 1 0      | 0 0      | 0 0 |   |   |   |   |   |   |   |   |   |   |   |   |
| 15 18   | 1 0      | 0 0      | 0 0 |   |   |   |   |   |   |   |   |   |   |   |   |
| 19 20   | 1 0      | 0 0      | 0 0 |   |   |   |   |   |   |   |   |   |   |   |   |
| 19 21   | 1 0      | 0 0      | 0 0 |   |   |   |   |   |   |   |   |   |   |   |   |
| 21 22   | 1 0      | 0 0      | 0 0 |   |   |   |   |   |   |   |   |   |   |   |   |
| 21 23   | 1 0      | 0 0      | 0 0 |   |   |   |   |   |   |   |   |   |   |   |   |
| 21 24   | 1 0      | 0 0      | 0 0 |   |   |   |   |   |   |   |   |   |   |   |   |
| 24 25   | 1 0      | 0 0      | 0 0 |   |   |   |   |   |   |   |   |   |   |   |   |
| 24 26   | 1 0      | 0 0      | 0 0 |   |   |   |   |   |   |   |   |   |   |   |   |
| 24 27   | 1 0      | 0 0      | 0 0 |   |   |   |   |   |   |   |   |   |   |   |   |
| 27 28   | 1 0      | 0 0      | 0 0 |   |   |   |   |   |   |   |   |   |   |   |   |
| 27 32   | 2 0      | 0 0      | 0 0 |   |   |   |   |   |   |   |   |   |   |   |   |
| 28 29   | 1 0      | 0 0      | 0 0 |   |   |   |   |   |   |   |   |   |   |   |   |
| 29 30   | 1 0      | 0 0      | 0 0 |   |   |   |   |   |   |   |   |   |   |   |   |
| 29 31   | 1 0      | 0 0      | 0 0 |   |   |   |   |   |   |   |   |   |   |   |   |
| 29 33   | 1 0      | 0 0      | 0 0 |   |   |   |   |   |   |   |   |   |   |   |   |
| 33 34   | 1 0      | 0 0      | 0 0 |   |   |   |   |   |   |   |   |   |   |   |   |
| 33 35   | 1 0      | 0 0      | 0 0 |   |   |   |   |   |   |   |   |   |   |   |   |
| 33 51   | 1 0      | 0 0      | 0 0 |   |   |   |   |   |   |   |   |   |   |   |   |
| 36 37   | 1 0      | 0 0      | 0 0 |   |   |   |   |   |   |   |   |   |   |   |   |
| 36 38   | 1 0      | 0 0      | 0 0 |   |   |   |   |   |   |   |   |   |   |   |   |
| 36 39   | 1 0      | 0 0      | 0 0 |   |   |   |   |   |   |   |   |   |   |   |   |
| 36 51   | 1 0      | 0 0      | 0 0 |   |   |   |   |   |   |   |   |   |   |   |   |
| 39 40   | 1 0      | 0 0      | 0 0 |   |   |   |   |   |   |   |   |   |   |   |   |
| 39 41   | 1 0      | 0 0      | 0 0 |   |   |   |   |   |   |   |   |   |   |   |   |
| 39 42   | 1 0      | 0 0      | 0 0 |   |   |   |   |   |   |   |   |   |   |   |   |
| 42 43   | 1 0      | 0 0      | 0 0 |   |   |   |   |   |   |   |   |   |   |   |   |
| 43 44   | 1 0      | 0 0      | 0 0 |   |   |   |   |   |   |   |   |   |   |   |   |
| 43 50   | 2 0      | 0 0      | 0 0 |   |   |   |   |   |   |   |   |   |   |   |   |
| 44 45   | 1 0      | 0 0      | 0 0 |   |   |   |   |   |   |   |   |   |   |   |   |
| 44 46   | 1 0      | 0 0      | 0 0 |   |   |   |   |   |   |   |   |   |   |   |   |
| 44 47   | 1 0      | 0 0      | 0 0 |   |   |   |   |   |   |   |   |   |   |   |   |
| 47 48   | 1 0      | 0 0      | 0 0 |   |   |   |   |   |   |   |   |   |   |   |   |
| 47 49   | 1 0      | 0 0      | 0 0 |   |   |   |   |   |   |   |   |   |   |   |   |
| 47 72   | 1 0      | 0 0      | 0 0 |   |   |   |   |   |   |   |   |   |   |   |   |
| 51 52   | 1 0      | 0 0      | 0 0 |   |   |   |   |   |   |   |   |   |   |   |   |
| 51 53   | 1 0      | 0 0      | 0 0 |   |   |   |   |   |   |   |   |   |   |   |   |
| 54 55   | 1 0      | 0 0      | 0 0 |   |   |   |   |   |   |   |   |   |   |   |   |
| 54 56   | 1 0      | 0 0      | 0 0 |   |   |   |   |   |   |   |   |   |   |   |   |
| 54 57   | 1 0      | 0 0      | 0 0 |   |   |   |   |   |   |   |   |   |   |   |   |
| 54 58   | 1 0      | 0 0      | 0 0 |   |   |   |   |   |   |   |   |   |   |   |   |
| 58 59   | 1 0      | 0 0      | 0 0 |   |   |   |   |   |   |   |   |   |   |   |   |
| 58 68   | 1 0      | 0 0      | 0 0 |   |   |   |   |   |   |   |   |   |   |   |   |
| 59 60   | 1 0      | 0 0      | 0 0 |   |   |   |   |   |   |   |   |   |   |   |   |
| 59 61   | 1 0      | 0 0      | 0 0 |   |   |   |   |   |   |   |   |   |   |   |   |
| 59 62   | 1 0      | 0 0      | 0 0 |   |   |   |   |   |   |   |   |   |   |   |   |
| 62 63   | 1 0      | 0 0      | 0 0 |   |   |   |   |   |   |   |   |   |   |   |   |
| 62 64   | 1 0      | 0 0      | 0 0 |   |   |   |   |   |   |   |   |   |   |   |   |
| 62 65   | 1 0      | 0 0      | 0 0 |   |   |   |   |   |   |   |   |   |   |   |   |
| 65 66   | 1 0      | 0 0      | 0 0 |   |   |   |   |   |   |   |   |   |   |   |   |
| 65 67   | 1 0      | 0 0      | 0 0 |   |   |   |   |   |   |   |   |   |   |   |   |
| 65 72   | 1 0      | 0 0      | 0 0 |   |   |   |   |   |   |   |   |   |   |   |   |

|     |     |   |   |   |   |   |
|-----|-----|---|---|---|---|---|
| 68  | 69  | 1 | 0 | 0 | 0 | 0 |
| 68  | 70  | 1 | 0 | 0 | 0 | 0 |
| 68  | 71  | 1 | 0 | 0 | 0 | 0 |
| 72  | 73  | 1 | 0 | 0 | 0 | 0 |
| 73  | 74  | 1 | 0 | 0 | 0 | 0 |
| 73  | 75  | 1 | 0 | 0 | 0 | 0 |
| 73  | 76  | 1 | 0 | 0 | 0 | 0 |
| 76  | 77  | 1 | 0 | 0 | 0 | 0 |
| 76  | 78  | 1 | 0 | 0 | 0 | 0 |
| 76  | 79  | 1 | 0 | 0 | 0 | 0 |
| 79  | 80  | 1 | 0 | 0 | 0 | 0 |
| 79  | 84  | 2 | 0 | 0 | 0 | 0 |
| 80  | 81  | 1 | 0 | 0 | 0 | 0 |
| 81  | 82  | 1 | 0 | 0 | 0 | 0 |
| 81  | 83  | 1 | 0 | 0 | 0 | 0 |
| 81  | 85  | 1 | 0 | 0 | 0 | 0 |
| 85  | 86  | 1 | 0 | 0 | 0 | 0 |
| 85  | 87  | 1 | 0 | 0 | 0 | 0 |
| 85  | 103 | 1 | 0 | 0 | 0 | 0 |
| 88  | 89  | 1 | 0 | 0 | 0 | 0 |
| 88  | 90  | 1 | 0 | 0 | 0 | 0 |
| 88  | 91  | 1 | 0 | 0 | 0 | 0 |
| 88  | 103 | 1 | 0 | 0 | 0 | 0 |
| 91  | 92  | 1 | 0 | 0 | 0 | 0 |
| 91  | 93  | 1 | 0 | 0 | 0 | 0 |
| 91  | 94  | 1 | 0 | 0 | 0 | 0 |
| 94  | 95  | 1 | 0 | 0 | 0 | 0 |
| 95  | 96  | 1 | 0 | 0 | 0 | 0 |
| 95  | 102 | 2 | 0 | 0 | 0 | 0 |
| 96  | 97  | 1 | 0 | 0 | 0 | 0 |
| 96  | 98  | 1 | 0 | 0 | 0 | 0 |
| 96  | 99  | 1 | 0 | 0 | 0 | 0 |
| 99  | 100 | 1 | 0 | 0 | 0 | 0 |
| 99  | 101 | 1 | 0 | 0 | 0 | 0 |
| 99  | 124 | 1 | 0 | 0 | 0 | 0 |
| 103 | 104 | 1 | 0 | 0 | 0 | 0 |
| 103 | 105 | 1 | 0 | 0 | 0 | 0 |
| 106 | 107 | 1 | 0 | 0 | 0 | 0 |
| 106 | 108 | 1 | 0 | 0 | 0 | 0 |
| 106 | 109 | 1 | 0 | 0 | 0 | 0 |
| 106 | 110 | 1 | 0 | 0 | 0 | 0 |
| 110 | 111 | 1 | 0 | 0 | 0 | 0 |
| 110 | 120 | 1 | 0 | 0 | 0 | 0 |
| 111 | 112 | 1 | 0 | 0 | 0 | 0 |
| 111 | 113 | 1 | 0 | 0 | 0 | 0 |
| 111 | 114 | 1 | 0 | 0 | 0 | 0 |
| 114 | 115 | 1 | 0 | 0 | 0 | 0 |
| 114 | 116 | 1 | 0 | 0 | 0 | 0 |
| 114 | 117 | 1 | 0 | 0 | 0 | 0 |
| 117 | 118 | 1 | 0 | 0 | 0 | 0 |
| 117 | 119 | 1 | 0 | 0 | 0 | 0 |
| 117 | 124 | 1 | 0 | 0 | 0 | 0 |
| 120 | 121 | 1 | 0 | 0 | 0 | 0 |
| 120 | 122 | 1 | 0 | 0 | 0 | 0 |
| 120 | 123 | 1 | 0 | 0 | 0 | 0 |
| 124 | 125 | 1 | 0 | 0 | 0 | 0 |
| 125 | 126 | 1 | 0 | 0 | 0 | 0 |
| 125 | 127 | 1 | 0 | 0 | 0 | 0 |
| 125 | 128 | 1 | 0 | 0 | 0 | 0 |
| 128 | 129 | 1 | 0 | 0 | 0 | 0 |
| 128 | 130 | 1 | 0 | 0 | 0 | 0 |
| 128 | 131 | 1 | 0 | 0 | 0 | 0 |
| 131 | 132 | 1 | 0 | 0 | 0 | 0 |
| 131 | 136 | 2 | 0 | 0 | 0 | 0 |
| 132 | 133 | 1 | 0 | 0 | 0 | 0 |
| 133 | 134 | 1 | 0 | 0 | 0 | 0 |
| 133 | 135 | 1 | 0 | 0 | 0 | 0 |
| 133 | 137 | 1 | 0 | 0 | 0 | 0 |
| 137 | 138 | 1 | 0 | 0 | 0 | 0 |
| 137 | 139 | 1 | 0 | 0 | 0 | 0 |
| 137 | 155 | 1 | 0 | 0 | 0 | 0 |
| 140 | 141 | 1 | 0 | 0 | 0 | 0 |
| 140 | 142 | 1 | 0 | 0 | 0 | 0 |
| 140 | 143 | 1 | 0 | 0 | 0 | 0 |
| 140 | 155 | 1 | 0 | 0 | 0 | 0 |
| 143 | 144 | 1 | 0 | 0 | 0 | 0 |
| 143 | 145 | 1 | 0 | 0 | 0 | 0 |
| 143 | 146 | 1 | 0 | 0 | 0 | 0 |
| 146 | 147 | 1 | 0 | 0 | 0 | 0 |
| 147 | 148 | 1 | 0 | 0 | 0 | 0 |
| 147 | 154 | 2 | 0 | 0 | 0 | 0 |

|        |   |   |   |   |   |
|--------|---|---|---|---|---|
| 148149 | 1 | 0 | 0 | 0 | 0 |
| 148150 | 1 | 0 | 0 | 0 | 0 |
| 148151 | 1 | 0 | 0 | 0 | 0 |
| 151152 | 1 | 0 | 0 | 0 | 0 |
| 151153 | 1 | 0 | 0 | 0 | 0 |
| 151176 | 1 | 0 | 0 | 0 | 0 |
| 155156 | 1 | 0 | 0 | 0 | 0 |
| 155157 | 1 | 0 | 0 | 0 | 0 |
| 158159 | 1 | 0 | 0 | 0 | 0 |
| 158160 | 1 | 0 | 0 | 0 | 0 |
| 158161 | 1 | 0 | 0 | 0 | 0 |
| 158162 | 1 | 0 | 0 | 0 | 0 |
| 162163 | 1 | 0 | 0 | 0 | 0 |
| 162172 | 1 | 0 | 0 | 0 | 0 |
| 163164 | 1 | 0 | 0 | 0 | 0 |
| 163165 | 1 | 0 | 0 | 0 | 0 |
| 163166 | 1 | 0 | 0 | 0 | 0 |
| 166167 | 1 | 0 | 0 | 0 | 0 |
| 166168 | 1 | 0 | 0 | 0 | 0 |
| 166169 | 1 | 0 | 0 | 0 | 0 |
| 169170 | 1 | 0 | 0 | 0 | 0 |
| 169171 | 1 | 0 | 0 | 0 | 0 |
| 169176 | 1 | 0 | 0 | 0 | 0 |
| 172173 | 1 | 0 | 0 | 0 | 0 |
| 172174 | 1 | 0 | 0 | 0 | 0 |
| 172175 | 1 | 0 | 0 | 0 | 0 |
| 176177 | 1 | 0 | 0 | 0 | 0 |
| 177178 | 1 | 0 | 0 | 0 | 0 |
| 177179 | 1 | 0 | 0 | 0 | 0 |
| 177180 | 1 | 0 | 0 | 0 | 0 |
| 180181 | 1 | 0 | 0 | 0 | 0 |
| 180182 | 1 | 0 | 0 | 0 | 0 |
| 180183 | 1 | 0 | 0 | 0 | 0 |
| 183184 | 1 | 0 | 0 | 0 | 0 |
| 183188 | 2 | 0 | 0 | 0 | 0 |
| 184185 | 1 | 0 | 0 | 0 | 0 |
| 185186 | 1 | 0 | 0 | 0 | 0 |
| 185187 | 1 | 0 | 0 | 0 | 0 |
| 185189 | 1 | 0 | 0 | 0 | 0 |
| 189190 | 1 | 0 | 0 | 0 | 0 |
| 189191 | 1 | 0 | 0 | 0 | 0 |
| 189207 | 1 | 0 | 0 | 0 | 0 |
| 192193 | 1 | 0 | 0 | 0 | 0 |
| 192194 | 1 | 0 | 0 | 0 | 0 |
| 192195 | 1 | 0 | 0 | 0 | 0 |
| 192207 | 1 | 0 | 0 | 0 | 0 |
| 195196 | 1 | 0 | 0 | 0 | 0 |
| 195197 | 1 | 0 | 0 | 0 | 0 |
| 195198 | 1 | 0 | 0 | 0 | 0 |
| 198199 | 1 | 0 | 0 | 0 | 0 |
| 199200 | 1 | 0 | 0 | 0 | 0 |
| 199206 | 2 | 0 | 0 | 0 | 0 |
| 200201 | 1 | 0 | 0 | 0 | 0 |
| 200202 | 1 | 0 | 0 | 0 | 0 |
| 200203 | 1 | 0 | 0 | 0 | 0 |
| 203204 | 1 | 0 | 0 | 0 | 0 |
| 203205 | 1 | 0 | 0 | 0 | 0 |
| 203228 | 1 | 0 | 0 | 0 | 0 |
| 207208 | 1 | 0 | 0 | 0 | 0 |
| 207209 | 1 | 0 | 0 | 0 | 0 |
| 210211 | 1 | 0 | 0 | 0 | 0 |
| 210212 | 1 | 0 | 0 | 0 | 0 |
| 210213 | 1 | 0 | 0 | 0 | 0 |
| 210214 | 1 | 0 | 0 | 0 | 0 |
| 214215 | 1 | 0 | 0 | 0 | 0 |
| 214224 | 1 | 0 | 0 | 0 | 0 |
| 215216 | 1 | 0 | 0 | 0 | 0 |
| 215217 | 1 | 0 | 0 | 0 | 0 |
| 215218 | 1 | 0 | 0 | 0 | 0 |
| 218219 | 1 | 0 | 0 | 0 | 0 |
| 218220 | 1 | 0 | 0 | 0 | 0 |
| 218221 | 1 | 0 | 0 | 0 | 0 |
| 221222 | 1 | 0 | 0 | 0 | 0 |
| 221223 | 1 | 0 | 0 | 0 | 0 |
| 221228 | 1 | 0 | 0 | 0 | 0 |
| 224225 | 1 | 0 | 0 | 0 | 0 |
| 224226 | 1 | 0 | 0 | 0 | 0 |
| 224227 | 1 | 0 | 0 | 0 | 0 |
| 228229 | 1 | 0 | 0 | 0 | 0 |
| 229230 | 1 | 0 | 0 | 0 | 0 |
| 229231 | 1 | 0 | 0 | 0 | 0 |

```

229232 1 0 0 0 0
232233 1 0 0 0 0
232234 1 0 0 0 0
232235 1 0 0 0 0
235236 1 0 0 0 0
235240 2 0 0 0 0
236237 1 0 0 0 0
237238 1 0 0 0 0
237239 1 0 0 0 0
237241 1 0 0 0 0
241242 1 0 0 0 0
241243 1 0 0 0 0
241259 1 0 0 0 0
244245 1 0 0 0 0
244246 1 0 0 0 0
244247 1 0 0 0 0
244259 1 0 0 0 0
247248 1 0 0 0 0
247249 1 0 0 0 0
247250 1 0 0 0 0
250251 1 0 0 0 0
251252 1 0 0 0 0
251258 2 0 0 0 0
252253 1 0 0 0 0
252254 1 0 0 0 0
252255 1 0 0 0 0
255256 1 0 0 0 0
255257 1 0 0 0 0
255280 1 0 0 0 0
259260 1 0 0 0 0
259261 1 0 0 0 0
262263 1 0 0 0 0
262264 1 0 0 0 0
262265 1 0 0 0 0
262266 1 0 0 0 0
266267 1 0 0 0 0
266276 1 0 0 0 0
267268 1 0 0 0 0
267269 1 0 0 0 0
267270 1 0 0 0 0
270271 1 0 0 0 0
270272 1 0 0 0 0
270273 1 0 0 0 0
273274 1 0 0 0 0
273275 1 0 0 0 0
273280 1 0 0 0 0
276277 1 0 0 0 0
276278 1 0 0 0 0
276279 1 0 0 0 0
280281 1 0 0 0 0

```

```

M END
> <NAME>
JJ80_12

```

```

$$$$
JJ86_12
MOE2012 3D

```

```

311310 0 0 1 0 0 0 0 0999 V2000
12.8920 -6.4420 -16.0210 C 0 0 0 0 0 0 0 0 0 0 0 0 0 0 0 0
11.8280 -6.6880 -15.9000 H 0 0 0 0 0 0 0 0 0 0 0 0 0 0 0 0
12.9300 -5.3480 -16.1190 H 0 0 0 0 0 0 0 0 0 0 0 0 0 0 0 0
13.6390 -6.8950 -14.8280 N 0 0 0 0 0 0 0 0 0 0 0 0 0 0 0 0
12.9810 -6.3800 -13.6070 C 0 0 0 0 0 0 0 0 0 0 0 0 0 0 0 0
13.1670 -5.3040 -13.4910 H 0 0 0 0 0 0 0 0 0 0 0 0 0 0 0 0
11.8970 -6.5040 -13.7120 H 0 0 0 0 0 0 0 0 0 0 0 0 0 0 0 0
13.4070 -7.1460 -12.3330 C 0 0 0 0 0 0 0 0 0 0 0 0 0 0 0 0
13.1680 -8.2120 -12.4390 H 0 0 0 0 0 0 0 0 0 0 0 0 0 0 0 0
14.4950 -7.0940 -12.2140 H 0 0 0 0 0 0 0 0 0 0 0 0 0 0 0 0
12.8250 -6.6280 -11.0870 N 0 0 0 3 0 0 0 0 0 0 0 0 0 0 0 0
13.0340 -5.6330 -10.9980 H 0 0 0 0 0 0 0 0 0 0 0 0 0 0 0 0
15.0590 -6.4950 -14.8900 C 0 0 0 0 0 0 0 0 0 0 0 0 0 0 0 0
15.2420 -5.7310 -15.6580 H 0 0 0 0 0 0 0 0 0 0 0 0 0 0 0 0
15.3950 -6.0130 -13.9630 H 0 0 0 0 0 0 0 0 0 0 0 0 0 0 0 0
13.3420 -7.0920 -17.3350 C 0 0 0 0 0 0 0 0 0 0 0 0 0 0 0 0
14.3630 -6.8030 -17.5990 H 0 0 0 0 0 0 0 0 0 0 0 0 0 0 0 0
13.2850 -8.1830 -17.2660 H 0 0 0 0 0 0 0 0 0 0 0 0 0 0 0 0
12.4810 -6.6660 -18.3880 O 0 0 0 0 0 0 0 0 0 0 0 0 0 0 0 0
12.7860 -7.1050 -19.2010 H 0 0 0 0 0 0 0 0 0 0 0 0 0 0 0 0
15.9580 -7.7090 -15.1370 C 0 0 0 0 0 0 0 0 0 0 0 0 0 0 0 0
15.8900 -8.4180 -14.3050 H 0 0 0 0 0 0 0 0 0 0 0 0 0 0 0 0

```











|     |     |   |   |   |   |   |
|-----|-----|---|---|---|---|---|
| 34  | 36  | 1 | 0 | 0 | 0 | 0 |
| 34  | 38  | 1 | 0 | 0 | 0 | 0 |
| 38  | 39  | 1 | 0 | 0 | 0 | 0 |
| 38  | 40  | 1 | 0 | 0 | 0 | 0 |
| 38  | 56  | 1 | 0 | 0 | 0 | 0 |
| 41  | 42  | 1 | 0 | 0 | 0 | 0 |
| 41  | 43  | 1 | 0 | 0 | 0 | 0 |
| 41  | 44  | 1 | 0 | 0 | 0 | 0 |
| 41  | 56  | 1 | 0 | 0 | 0 | 0 |
| 44  | 45  | 1 | 0 | 0 | 0 | 0 |
| 44  | 46  | 1 | 0 | 0 | 0 | 0 |
| 44  | 47  | 1 | 0 | 0 | 0 | 0 |
| 47  | 48  | 1 | 0 | 0 | 0 | 0 |
| 48  | 49  | 1 | 0 | 0 | 0 | 0 |
| 48  | 55  | 2 | 0 | 0 | 0 | 0 |
| 49  | 50  | 1 | 0 | 0 | 0 | 0 |
| 49  | 51  | 1 | 0 | 0 | 0 | 0 |
| 49  | 52  | 1 | 0 | 0 | 0 | 0 |
| 52  | 53  | 1 | 0 | 0 | 0 | 0 |
| 52  | 54  | 1 | 0 | 0 | 0 | 0 |
| 52  | 69  | 1 | 0 | 0 | 0 | 0 |
| 56  | 57  | 1 | 0 | 0 | 0 | 0 |
| 56  | 58  | 1 | 0 | 0 | 0 | 0 |
| 59  | 60  | 1 | 0 | 0 | 0 | 0 |
| 59  | 61  | 1 | 0 | 0 | 0 | 0 |
| 59  | 62  | 1 | 0 | 0 | 0 | 0 |
| 59  | 73  | 1 | 0 | 0 | 0 | 0 |
| 62  | 63  | 1 | 0 | 0 | 0 | 0 |
| 62  | 70  | 1 | 0 | 0 | 0 | 0 |
| 63  | 64  | 1 | 0 | 0 | 0 | 0 |
| 63  | 65  | 1 | 0 | 0 | 0 | 0 |
| 63  | 66  | 1 | 0 | 0 | 0 | 0 |
| 66  | 67  | 1 | 0 | 0 | 0 | 0 |
| 66  | 68  | 1 | 0 | 0 | 0 | 0 |
| 66  | 69  | 1 | 0 | 0 | 0 | 0 |
| 69  | 83  | 1 | 0 | 0 | 0 | 0 |
| 70  | 71  | 1 | 0 | 0 | 0 | 0 |
| 70  | 72  | 1 | 0 | 0 | 0 | 0 |
| 70  | 78  | 1 | 0 | 0 | 0 | 0 |
| 73  | 74  | 1 | 0 | 0 | 0 | 0 |
| 73  | 75  | 1 | 0 | 0 | 0 | 0 |
| 73  | 76  | 1 | 0 | 0 | 0 | 0 |
| 76  | 77  | 1 | 0 | 0 | 0 | 0 |
| 78  | 79  | 1 | 0 | 0 | 0 | 0 |
| 78  | 80  | 1 | 0 | 0 | 0 | 0 |
| 78  | 81  | 1 | 0 | 0 | 0 | 0 |
| 81  | 82  | 1 | 0 | 0 | 0 | 0 |
| 83  | 84  | 1 | 0 | 0 | 0 | 0 |
| 83  | 85  | 1 | 0 | 0 | 0 | 0 |
| 83  | 86  | 1 | 0 | 0 | 0 | 0 |
| 86  | 87  | 1 | 0 | 0 | 0 | 0 |
| 86  | 88  | 1 | 0 | 0 | 0 | 0 |
| 86  | 89  | 1 | 0 | 0 | 0 | 0 |
| 89  | 90  | 1 | 0 | 0 | 0 | 0 |
| 89  | 94  | 2 | 0 | 0 | 0 | 0 |
| 90  | 91  | 1 | 0 | 0 | 0 | 0 |
| 91  | 92  | 1 | 0 | 0 | 0 | 0 |
| 91  | 93  | 1 | 0 | 0 | 0 | 0 |
| 91  | 95  | 1 | 0 | 0 | 0 | 0 |
| 95  | 96  | 1 | 0 | 0 | 0 | 0 |
| 95  | 97  | 1 | 0 | 0 | 0 | 0 |
| 95  | 113 | 1 | 0 | 0 | 0 | 0 |
| 98  | 99  | 1 | 0 | 0 | 0 | 0 |
| 98  | 100 | 1 | 0 | 0 | 0 | 0 |
| 98  | 101 | 1 | 0 | 0 | 0 | 0 |
| 98  | 113 | 1 | 0 | 0 | 0 | 0 |
| 101 | 102 | 1 | 0 | 0 | 0 | 0 |
| 101 | 103 | 1 | 0 | 0 | 0 | 0 |
| 101 | 104 | 1 | 0 | 0 | 0 | 0 |
| 104 | 105 | 1 | 0 | 0 | 0 | 0 |
| 105 | 106 | 1 | 0 | 0 | 0 | 0 |
| 105 | 112 | 2 | 0 | 0 | 0 | 0 |
| 106 | 107 | 1 | 0 | 0 | 0 | 0 |
| 106 | 108 | 1 | 0 | 0 | 0 | 0 |
| 106 | 109 | 1 | 0 | 0 | 0 | 0 |
| 109 | 110 | 1 | 0 | 0 | 0 | 0 |
| 109 | 111 | 1 | 0 | 0 | 0 | 0 |
| 109 | 126 | 1 | 0 | 0 | 0 | 0 |
| 113 | 114 | 1 | 0 | 0 | 0 | 0 |
| 113 | 115 | 1 | 0 | 0 | 0 | 0 |
| 116 | 117 | 1 | 0 | 0 | 0 | 0 |

|        |   |   |   |   |   |
|--------|---|---|---|---|---|
| 116118 | 1 | 0 | 0 | 0 | 0 |
| 116119 | 1 | 0 | 0 | 0 | 0 |
| 116130 | 1 | 0 | 0 | 0 | 0 |
| 119120 | 1 | 0 | 0 | 0 | 0 |
| 119127 | 1 | 0 | 0 | 0 | 0 |
| 120121 | 1 | 0 | 0 | 0 | 0 |
| 120122 | 1 | 0 | 0 | 0 | 0 |
| 120123 | 1 | 0 | 0 | 0 | 0 |
| 123124 | 1 | 0 | 0 | 0 | 0 |
| 123125 | 1 | 0 | 0 | 0 | 0 |
| 123126 | 1 | 0 | 0 | 0 | 0 |
| 126140 | 1 | 0 | 0 | 0 | 0 |
| 127128 | 1 | 0 | 0 | 0 | 0 |
| 127129 | 1 | 0 | 0 | 0 | 0 |
| 127135 | 1 | 0 | 0 | 0 | 0 |
| 130131 | 1 | 0 | 0 | 0 | 0 |
| 130132 | 1 | 0 | 0 | 0 | 0 |
| 130133 | 1 | 0 | 0 | 0 | 0 |
| 133134 | 1 | 0 | 0 | 0 | 0 |
| 135136 | 1 | 0 | 0 | 0 | 0 |
| 135137 | 1 | 0 | 0 | 0 | 0 |
| 135138 | 1 | 0 | 0 | 0 | 0 |
| 138139 | 1 | 0 | 0 | 0 | 0 |
| 140141 | 1 | 0 | 0 | 0 | 0 |
| 140142 | 1 | 0 | 0 | 0 | 0 |
| 140143 | 1 | 0 | 0 | 0 | 0 |
| 143144 | 1 | 0 | 0 | 0 | 0 |
| 143145 | 1 | 0 | 0 | 0 | 0 |
| 143146 | 1 | 0 | 0 | 0 | 0 |
| 146147 | 1 | 0 | 0 | 0 | 0 |
| 146151 | 2 | 0 | 0 | 0 | 0 |
| 147148 | 1 | 0 | 0 | 0 | 0 |
| 148149 | 1 | 0 | 0 | 0 | 0 |
| 148150 | 1 | 0 | 0 | 0 | 0 |
| 148152 | 1 | 0 | 0 | 0 | 0 |
| 152153 | 1 | 0 | 0 | 0 | 0 |
| 152154 | 1 | 0 | 0 | 0 | 0 |
| 152170 | 1 | 0 | 0 | 0 | 0 |
| 155156 | 1 | 0 | 0 | 0 | 0 |
| 155157 | 1 | 0 | 0 | 0 | 0 |
| 155158 | 1 | 0 | 0 | 0 | 0 |
| 155170 | 1 | 0 | 0 | 0 | 0 |
| 158159 | 1 | 0 | 0 | 0 | 0 |
| 158160 | 1 | 0 | 0 | 0 | 0 |
| 158161 | 1 | 0 | 0 | 0 | 0 |
| 161162 | 1 | 0 | 0 | 0 | 0 |
| 162163 | 1 | 0 | 0 | 0 | 0 |
| 162169 | 2 | 0 | 0 | 0 | 0 |
| 163164 | 1 | 0 | 0 | 0 | 0 |
| 163165 | 1 | 0 | 0 | 0 | 0 |
| 163166 | 1 | 0 | 0 | 0 | 0 |
| 166167 | 1 | 0 | 0 | 0 | 0 |
| 166168 | 1 | 0 | 0 | 0 | 0 |
| 166183 | 1 | 0 | 0 | 0 | 0 |
| 170171 | 1 | 0 | 0 | 0 | 0 |
| 170172 | 1 | 0 | 0 | 0 | 0 |
| 173174 | 1 | 0 | 0 | 0 | 0 |
| 173175 | 1 | 0 | 0 | 0 | 0 |
| 173176 | 1 | 0 | 0 | 0 | 0 |
| 173187 | 1 | 0 | 0 | 0 | 0 |
| 176177 | 1 | 0 | 0 | 0 | 0 |
| 176184 | 1 | 0 | 0 | 0 | 0 |
| 177178 | 1 | 0 | 0 | 0 | 0 |
| 177179 | 1 | 0 | 0 | 0 | 0 |
| 177180 | 1 | 0 | 0 | 0 | 0 |
| 180181 | 1 | 0 | 0 | 0 | 0 |
| 180182 | 1 | 0 | 0 | 0 | 0 |
| 180183 | 1 | 0 | 0 | 0 | 0 |
| 183197 | 1 | 0 | 0 | 0 | 0 |
| 184185 | 1 | 0 | 0 | 0 | 0 |
| 184186 | 1 | 0 | 0 | 0 | 0 |
| 184192 | 1 | 0 | 0 | 0 | 0 |
| 187188 | 1 | 0 | 0 | 0 | 0 |
| 187189 | 1 | 0 | 0 | 0 | 0 |
| 187190 | 1 | 0 | 0 | 0 | 0 |
| 190191 | 1 | 0 | 0 | 0 | 0 |
| 192193 | 1 | 0 | 0 | 0 | 0 |
| 192194 | 1 | 0 | 0 | 0 | 0 |
| 192195 | 1 | 0 | 0 | 0 | 0 |
| 195196 | 1 | 0 | 0 | 0 | 0 |
| 197198 | 1 | 0 | 0 | 0 | 0 |

|        |   |   |   |   |   |
|--------|---|---|---|---|---|
| 197199 | 1 | 0 | 0 | 0 | 0 |
| 197200 | 1 | 0 | 0 | 0 | 0 |
| 200201 | 1 | 0 | 0 | 0 | 0 |
| 200202 | 1 | 0 | 0 | 0 | 0 |
| 200203 | 1 | 0 | 0 | 0 | 0 |
| 203204 | 1 | 0 | 0 | 0 | 0 |
| 203208 | 2 | 0 | 0 | 0 | 0 |
| 204205 | 1 | 0 | 0 | 0 | 0 |
| 205206 | 1 | 0 | 0 | 0 | 0 |
| 205207 | 1 | 0 | 0 | 0 | 0 |
| 205209 | 1 | 0 | 0 | 0 | 0 |
| 209210 | 1 | 0 | 0 | 0 | 0 |
| 209211 | 1 | 0 | 0 | 0 | 0 |
| 209227 | 1 | 0 | 0 | 0 | 0 |
| 212213 | 1 | 0 | 0 | 0 | 0 |
| 212214 | 1 | 0 | 0 | 0 | 0 |
| 212215 | 1 | 0 | 0 | 0 | 0 |
| 212227 | 1 | 0 | 0 | 0 | 0 |
| 215216 | 1 | 0 | 0 | 0 | 0 |
| 215217 | 1 | 0 | 0 | 0 | 0 |
| 215218 | 1 | 0 | 0 | 0 | 0 |
| 218219 | 1 | 0 | 0 | 0 | 0 |
| 219220 | 1 | 0 | 0 | 0 | 0 |
| 219226 | 2 | 0 | 0 | 0 | 0 |
| 220221 | 1 | 0 | 0 | 0 | 0 |
| 220222 | 1 | 0 | 0 | 0 | 0 |
| 220223 | 1 | 0 | 0 | 0 | 0 |
| 223224 | 1 | 0 | 0 | 0 | 0 |
| 223225 | 1 | 0 | 0 | 0 | 0 |
| 223240 | 1 | 0 | 0 | 0 | 0 |
| 227228 | 1 | 0 | 0 | 0 | 0 |
| 227229 | 1 | 0 | 0 | 0 | 0 |
| 230231 | 1 | 0 | 0 | 0 | 0 |
| 230232 | 1 | 0 | 0 | 0 | 0 |
| 230233 | 1 | 0 | 0 | 0 | 0 |
| 230244 | 1 | 0 | 0 | 0 | 0 |
| 233234 | 1 | 0 | 0 | 0 | 0 |
| 233241 | 1 | 0 | 0 | 0 | 0 |
| 234235 | 1 | 0 | 0 | 0 | 0 |
| 234236 | 1 | 0 | 0 | 0 | 0 |
| 234237 | 1 | 0 | 0 | 0 | 0 |
| 237238 | 1 | 0 | 0 | 0 | 0 |
| 237239 | 1 | 0 | 0 | 0 | 0 |
| 237240 | 1 | 0 | 0 | 0 | 0 |
| 240254 | 1 | 0 | 0 | 0 | 0 |
| 241242 | 1 | 0 | 0 | 0 | 0 |
| 241243 | 1 | 0 | 0 | 0 | 0 |
| 241249 | 1 | 0 | 0 | 0 | 0 |
| 244245 | 1 | 0 | 0 | 0 | 0 |
| 244246 | 1 | 0 | 0 | 0 | 0 |
| 244247 | 1 | 0 | 0 | 0 | 0 |
| 247248 | 1 | 0 | 0 | 0 | 0 |
| 249250 | 1 | 0 | 0 | 0 | 0 |
| 249251 | 1 | 0 | 0 | 0 | 0 |
| 249252 | 1 | 0 | 0 | 0 | 0 |
| 252253 | 1 | 0 | 0 | 0 | 0 |
| 254255 | 1 | 0 | 0 | 0 | 0 |
| 254256 | 1 | 0 | 0 | 0 | 0 |
| 254257 | 1 | 0 | 0 | 0 | 0 |
| 257258 | 1 | 0 | 0 | 0 | 0 |
| 257259 | 1 | 0 | 0 | 0 | 0 |
| 257260 | 1 | 0 | 0 | 0 | 0 |
| 260261 | 1 | 0 | 0 | 0 | 0 |
| 260265 | 2 | 0 | 0 | 0 | 0 |
| 261262 | 1 | 0 | 0 | 0 | 0 |
| 262263 | 1 | 0 | 0 | 0 | 0 |
| 262264 | 1 | 0 | 0 | 0 | 0 |
| 262266 | 1 | 0 | 0 | 0 | 0 |
| 266267 | 1 | 0 | 0 | 0 | 0 |
| 266268 | 1 | 0 | 0 | 0 | 0 |
| 266284 | 1 | 0 | 0 | 0 | 0 |
| 269270 | 1 | 0 | 0 | 0 | 0 |
| 269271 | 1 | 0 | 0 | 0 | 0 |
| 269272 | 1 | 0 | 0 | 0 | 0 |
| 269284 | 1 | 0 | 0 | 0 | 0 |
| 272273 | 1 | 0 | 0 | 0 | 0 |
| 272274 | 1 | 0 | 0 | 0 | 0 |
| 272275 | 1 | 0 | 0 | 0 | 0 |
| 275276 | 1 | 0 | 0 | 0 | 0 |
| 276277 | 1 | 0 | 0 | 0 | 0 |
| 276283 | 2 | 0 | 0 | 0 | 0 |

```

277278 1 0 0 0 0
277279 1 0 0 0 0
277280 1 0 0 0 0
280281 1 0 0 0 0
280282 1 0 0 0 0
280297 1 0 0 0 0
284285 1 0 0 0 0
284286 1 0 0 0 0
287288 1 0 0 0 0
287289 1 0 0 0 0
287290 1 0 0 0 0
287302 1 0 0 0 0
290291 1 0 0 0 0
290299 1 0 0 0 0
291292 1 0 0 0 0
291293 1 0 0 0 0
291294 1 0 0 0 0
294295 1 0 0 0 0
294296 1 0 0 0 0
294297 1 0 0 0 0
297298 1 0 0 0 0
299300 1 0 0 0 0
299301 1 0 0 0 0
299307 1 0 0 0 0
302303 1 0 0 0 0
302304 1 0 0 0 0
302305 1 0 0 0 0
305306 1 0 0 0 0
307308 1 0 0 0 0
307309 1 0 0 0 0
307310 1 0 0 0 0
310311 1 0 0 0 0

```

```

M END
> <NAME>
JJ86_12

```

```

$$$$
JJ94_12
MOE2012 3D

```

```

257262 0 0 1 0 0 0 0 0999 V2000
18.4810 -2.4810 -15.9400 N 0 0 0 0 0 0 0 0 0 0 0 0 0 0 0
18.8810 -2.0630 -14.7030 C 0 0 0 0 0 0 0 0 0 0 0 0 0 0 0
19.4050 -2.7030 -14.0070 H 0 0 0 0 0 0 0 0 0 0 0 0 0 0 0
18.4680 -0.7530 -14.6240 C 0 0 0 0 0 0 0 0 0 0 0 0 0 0 0
18.5950 -0.0650 -13.7990 H 0 0 0 0 0 0 0 0 0 0 0 0 0 0 0
17.8310 -0.3690 -15.7770 N 0 0 0 0 0 0 0 0 0 0 0 0 0 0 0
17.8570 -1.4310 -16.5520 C 0 0 0 0 0 0 0 0 0 0 0 0 0 0 0
17.4430 -1.4920 -17.5500 H 0 0 0 0 0 0 0 0 0 0 0 0 0 0 0
18.6870 -3.7980 -16.5090 C 0 0 0 0 0 0 0 0 0 0 0 0 0 0 0
18.7710 -3.6770 -17.5960 H 0 0 0 0 0 0 0 0 0 0 0 0 0 0 0
19.6520 -4.1680 -16.1410 H 0 0 0 0 0 0 0 0 0 0 0 0 0 0 0
17.5550 -4.7640 -16.1480 C 0 0 0 0 0 0 0 0 0 0 0 0 0 0 0
17.5060 -4.8580 -15.0580 H 0 0 0 0 0 0 0 0 0 0 0 0 0 0 0
16.5970 -4.3500 -16.4860 H 0 0 0 0 0 0 0 0 0 0 0 0 0 0 0
17.7840 -6.0740 -16.7700 N 0 0 0 3 0 0 0 0 0 0 0 0 0 0 0
17.8170 -5.9580 -17.7850 H 0 0 0 0 0 0 0 0 0 0 0 0 0 0 0
16.7270 -7.0410 -16.4530 C 0 0 0 0 0 0 0 0 0 0 0 0 0 0 0
15.7400 -6.5940 -16.6210 H 0 0 0 0 0 0 0 0 0 0 0 0 0 0 0
16.8140 -7.8690 -17.1680 H 0 0 0 0 0 0 0 0 0 0 0 0 0 0 0
16.8120 -7.6060 -15.0390 C 0 0 0 0 0 0 0 0 0 0 0 0 0 0 0
16.7730 -6.8230 -14.2750 H 0 0 0 0 0 0 0 0 0 0 0 0 0 0 0
15.9520 -8.2580 -14.8430 H 0 0 0 0 0 0 0 0 0 0 0 0 0 0 0
18.0510 -8.4450 -14.8690 C 0 0 0 0 0 0 0 0 0 0 0 0 0 0 0
18.9540 -7.8060 -14.0750 O 0 0 0 0 0 0 0 0 0 0 0 0 0 0 0
20.1890 -8.5110 -13.8870 C 0 0 0 0 0 0 0 0 0 0 0 0 0 0 0
19.9880 -9.4740 -13.4040 H 0 0 0 0 0 0 0 0 0 0 0 0 0 0 0
20.6650 -8.6790 -14.8600 H 0 0 0 0 0 0 0 0 0 0 0 0 0 0 0
18.2050 -9.5450 -15.3850 O 0 0 0 0 0 0 0 0 0 0 0 0 0 0 0
21.0920 -7.6570 -13.0020 C 0 0 0 0 0 0 0 0 0 0 0 0 0 0 0
21.2430 -6.6790 -13.4760 H 0 0 0 0 0 0 0 0 0 0 0 0 0 0 0
20.5810 -7.4540 -12.0530 H 0 0 0 0 0 0 0 0 0 0 0 0 0 0 0
23.3320 -7.4760 -11.8520 C 0 0 0 0 0 0 0 0 0 0 0 0 0 0 0
22.8340 -7.2780 -10.8950 H 0 0 0 0 0 0 0 0 0 0 0 0 0 0 0
23.4990 -6.4940 -12.3130 H 0 0 0 0 0 0 0 0 0 0 0 0 0 0 0
24.6780 -8.1440 -11.5900 C 0 0 0 0 0 0 0 0 0 0 0 0 0 0 0
24.5310 -9.1070 -11.0880 H 0 0 0 0 0 0 0 0 0 0 0 0 0 0 0
25.2140 -8.2990 -12.5340 H 0 0 0 0 0 0 0 0 0 0 0 0 0 0 0
25.4480 -7.2780 -10.7420 O 0 0 0 0 0 0 0 0 0 0 0 0 0 0 0
26.6900 -7.7420 -10.4230 C 0 0 0 0 0 0 0 0 0 0 0 0 0 0 0
27.3880 -6.7480 -9.5230 C 0 0 0 0 0 0 0 0 0 0 0 0 0 0 0

```









|     |     |   |   |   |   |   |
|-----|-----|---|---|---|---|---|
| 25  | 26  | 1 | 0 | 0 | 0 | 0 |
| 25  | 27  | 1 | 0 | 0 | 0 | 0 |
| 25  | 29  | 1 | 0 | 0 | 0 | 0 |
| 29  | 30  | 1 | 0 | 0 | 0 | 0 |
| 29  | 31  | 1 | 0 | 0 | 0 | 0 |
| 29  | 47  | 1 | 0 | 0 | 0 | 0 |
| 32  | 33  | 1 | 0 | 0 | 0 | 0 |
| 32  | 34  | 1 | 0 | 0 | 0 | 0 |
| 32  | 35  | 1 | 0 | 0 | 0 | 0 |
| 32  | 47  | 1 | 0 | 0 | 0 | 0 |
| 35  | 36  | 1 | 0 | 0 | 0 | 0 |
| 35  | 37  | 1 | 0 | 0 | 0 | 0 |
| 35  | 38  | 1 | 0 | 0 | 0 | 0 |
| 38  | 39  | 1 | 0 | 0 | 0 | 0 |
| 39  | 40  | 1 | 0 | 0 | 0 | 0 |
| 39  | 46  | 2 | 0 | 0 | 0 | 0 |
| 40  | 41  | 1 | 0 | 0 | 0 | 0 |
| 40  | 42  | 1 | 0 | 0 | 0 | 0 |
| 40  | 43  | 1 | 0 | 0 | 0 | 0 |
| 43  | 44  | 1 | 0 | 0 | 0 | 0 |
| 43  | 45  | 1 | 0 | 0 | 0 | 0 |
| 43  | 64  | 1 | 0 | 0 | 0 | 0 |
| 47  | 48  | 1 | 0 | 0 | 0 | 0 |
| 47  | 49  | 1 | 0 | 0 | 0 | 0 |
| 50  | 51  | 1 | 0 | 0 | 0 | 0 |
| 50  | 56  | 1 | 0 | 0 | 0 | 0 |
| 50  | 58  | 1 | 0 | 0 | 0 | 0 |
| 51  | 52  | 1 | 0 | 0 | 0 | 0 |
| 51  | 53  | 2 | 0 | 0 | 0 | 0 |
| 53  | 54  | 1 | 0 | 0 | 0 | 0 |
| 53  | 55  | 1 | 0 | 0 | 0 | 0 |
| 55  | 56  | 2 | 0 | 0 | 0 | 0 |
| 56  | 57  | 1 | 0 | 0 | 0 | 0 |
| 58  | 59  | 1 | 0 | 0 | 0 | 0 |
| 58  | 60  | 1 | 0 | 0 | 0 | 0 |
| 58  | 61  | 1 | 0 | 0 | 0 | 0 |
| 61  | 62  | 1 | 0 | 0 | 0 | 0 |
| 61  | 63  | 1 | 0 | 0 | 0 | 0 |
| 61  | 64  | 1 | 0 | 0 | 0 | 0 |
| 64  | 65  | 1 | 0 | 0 | 0 | 0 |
| 65  | 66  | 1 | 0 | 0 | 0 | 0 |
| 65  | 67  | 1 | 0 | 0 | 0 | 0 |
| 65  | 68  | 1 | 0 | 0 | 0 | 0 |
| 68  | 69  | 1 | 0 | 0 | 0 | 0 |
| 68  | 70  | 1 | 0 | 0 | 0 | 0 |
| 68  | 71  | 1 | 0 | 0 | 0 | 0 |
| 71  | 72  | 1 | 0 | 0 | 0 | 0 |
| 71  | 76  | 2 | 0 | 0 | 0 | 0 |
| 72  | 73  | 1 | 0 | 0 | 0 | 0 |
| 73  | 74  | 1 | 0 | 0 | 0 | 0 |
| 73  | 75  | 1 | 0 | 0 | 0 | 0 |
| 73  | 77  | 1 | 0 | 0 | 0 | 0 |
| 77  | 78  | 1 | 0 | 0 | 0 | 0 |
| 77  | 79  | 1 | 0 | 0 | 0 | 0 |
| 77  | 95  | 1 | 0 | 0 | 0 | 0 |
| 80  | 81  | 1 | 0 | 0 | 0 | 0 |
| 80  | 82  | 1 | 0 | 0 | 0 | 0 |
| 80  | 83  | 1 | 0 | 0 | 0 | 0 |
| 80  | 95  | 1 | 0 | 0 | 0 | 0 |
| 83  | 84  | 1 | 0 | 0 | 0 | 0 |
| 83  | 85  | 1 | 0 | 0 | 0 | 0 |
| 83  | 86  | 1 | 0 | 0 | 0 | 0 |
| 86  | 87  | 1 | 0 | 0 | 0 | 0 |
| 87  | 88  | 1 | 0 | 0 | 0 | 0 |
| 87  | 94  | 2 | 0 | 0 | 0 | 0 |
| 88  | 89  | 1 | 0 | 0 | 0 | 0 |
| 88  | 90  | 1 | 0 | 0 | 0 | 0 |
| 88  | 91  | 1 | 0 | 0 | 0 | 0 |
| 91  | 92  | 1 | 0 | 0 | 0 | 0 |
| 91  | 93  | 1 | 0 | 0 | 0 | 0 |
| 91  | 112 | 1 | 0 | 0 | 0 | 0 |
| 95  | 96  | 1 | 0 | 0 | 0 | 0 |
| 95  | 97  | 1 | 0 | 0 | 0 | 0 |
| 98  | 99  | 1 | 0 | 0 | 0 | 0 |
| 98  | 104 | 1 | 0 | 0 | 0 | 0 |
| 98  | 106 | 1 | 0 | 0 | 0 | 0 |
| 99  | 100 | 1 | 0 | 0 | 0 | 0 |
| 99  | 101 | 2 | 0 | 0 | 0 | 0 |
| 101 | 102 | 1 | 0 | 0 | 0 | 0 |
| 101 | 103 | 1 | 0 | 0 | 0 | 0 |
| 103 | 104 | 2 | 0 | 0 | 0 | 0 |

|        |   |   |   |   |   |
|--------|---|---|---|---|---|
| 104105 | 1 | 0 | 0 | 0 | 0 |
| 106107 | 1 | 0 | 0 | 0 | 0 |
| 106108 | 1 | 0 | 0 | 0 | 0 |
| 106109 | 1 | 0 | 0 | 0 | 0 |
| 109110 | 1 | 0 | 0 | 0 | 0 |
| 109111 | 1 | 0 | 0 | 0 | 0 |
| 109112 | 1 | 0 | 0 | 0 | 0 |
| 112113 | 1 | 0 | 0 | 0 | 0 |
| 113114 | 1 | 0 | 0 | 0 | 0 |
| 113115 | 1 | 0 | 0 | 0 | 0 |
| 113116 | 1 | 0 | 0 | 0 | 0 |
| 116117 | 1 | 0 | 0 | 0 | 0 |
| 116118 | 1 | 0 | 0 | 0 | 0 |
| 116119 | 1 | 0 | 0 | 0 | 0 |
| 119120 | 1 | 0 | 0 | 0 | 0 |
| 119124 | 2 | 0 | 0 | 0 | 0 |
| 120121 | 1 | 0 | 0 | 0 | 0 |
| 121122 | 1 | 0 | 0 | 0 | 0 |
| 121123 | 1 | 0 | 0 | 0 | 0 |
| 121125 | 1 | 0 | 0 | 0 | 0 |
| 125126 | 1 | 0 | 0 | 0 | 0 |
| 125127 | 1 | 0 | 0 | 0 | 0 |
| 125143 | 1 | 0 | 0 | 0 | 0 |
| 128129 | 1 | 0 | 0 | 0 | 0 |
| 128130 | 1 | 0 | 0 | 0 | 0 |
| 128131 | 1 | 0 | 0 | 0 | 0 |
| 128143 | 1 | 0 | 0 | 0 | 0 |
| 131132 | 1 | 0 | 0 | 0 | 0 |
| 131133 | 1 | 0 | 0 | 0 | 0 |
| 131134 | 1 | 0 | 0 | 0 | 0 |
| 134135 | 1 | 0 | 0 | 0 | 0 |
| 135136 | 1 | 0 | 0 | 0 | 0 |
| 135142 | 2 | 0 | 0 | 0 | 0 |
| 136137 | 1 | 0 | 0 | 0 | 0 |
| 136138 | 1 | 0 | 0 | 0 | 0 |
| 136139 | 1 | 0 | 0 | 0 | 0 |
| 139140 | 1 | 0 | 0 | 0 | 0 |
| 139141 | 1 | 0 | 0 | 0 | 0 |
| 139160 | 1 | 0 | 0 | 0 | 0 |
| 143144 | 1 | 0 | 0 | 0 | 0 |
| 143145 | 1 | 0 | 0 | 0 | 0 |
| 146147 | 1 | 0 | 0 | 0 | 0 |
| 146152 | 1 | 0 | 0 | 0 | 0 |
| 146154 | 1 | 0 | 0 | 0 | 0 |
| 147148 | 1 | 0 | 0 | 0 | 0 |
| 147149 | 2 | 0 | 0 | 0 | 0 |
| 149150 | 1 | 0 | 0 | 0 | 0 |
| 149151 | 1 | 0 | 0 | 0 | 0 |
| 151152 | 2 | 0 | 0 | 0 | 0 |
| 152153 | 1 | 0 | 0 | 0 | 0 |
| 154155 | 1 | 0 | 0 | 0 | 0 |
| 154156 | 1 | 0 | 0 | 0 | 0 |
| 154157 | 1 | 0 | 0 | 0 | 0 |
| 157158 | 1 | 0 | 0 | 0 | 0 |
| 157159 | 1 | 0 | 0 | 0 | 0 |
| 157160 | 1 | 0 | 0 | 0 | 0 |
| 160161 | 1 | 0 | 0 | 0 | 0 |
| 161162 | 1 | 0 | 0 | 0 | 0 |
| 161163 | 1 | 0 | 0 | 0 | 0 |
| 161164 | 1 | 0 | 0 | 0 | 0 |
| 164165 | 1 | 0 | 0 | 0 | 0 |
| 164166 | 1 | 0 | 0 | 0 | 0 |
| 164167 | 1 | 0 | 0 | 0 | 0 |
| 167168 | 1 | 0 | 0 | 0 | 0 |
| 167172 | 2 | 0 | 0 | 0 | 0 |
| 168169 | 1 | 0 | 0 | 0 | 0 |
| 169170 | 1 | 0 | 0 | 0 | 0 |
| 169171 | 1 | 0 | 0 | 0 | 0 |
| 169173 | 1 | 0 | 0 | 0 | 0 |
| 173174 | 1 | 0 | 0 | 0 | 0 |
| 173175 | 1 | 0 | 0 | 0 | 0 |
| 173191 | 1 | 0 | 0 | 0 | 0 |
| 176177 | 1 | 0 | 0 | 0 | 0 |
| 176178 | 1 | 0 | 0 | 0 | 0 |
| 176179 | 1 | 0 | 0 | 0 | 0 |
| 176191 | 1 | 0 | 0 | 0 | 0 |
| 179180 | 1 | 0 | 0 | 0 | 0 |
| 179181 | 1 | 0 | 0 | 0 | 0 |
| 179182 | 1 | 0 | 0 | 0 | 0 |
| 182183 | 1 | 0 | 0 | 0 | 0 |
| 183184 | 1 | 0 | 0 | 0 | 0 |

|        |   |   |   |   |   |
|--------|---|---|---|---|---|
| 183190 | 2 | 0 | 0 | 0 | 0 |
| 184185 | 1 | 0 | 0 | 0 | 0 |
| 184186 | 1 | 0 | 0 | 0 | 0 |
| 184187 | 1 | 0 | 0 | 0 | 0 |
| 187188 | 1 | 0 | 0 | 0 | 0 |
| 187189 | 1 | 0 | 0 | 0 | 0 |
| 187208 | 1 | 0 | 0 | 0 | 0 |
| 191192 | 1 | 0 | 0 | 0 | 0 |
| 191193 | 1 | 0 | 0 | 0 | 0 |
| 194195 | 1 | 0 | 0 | 0 | 0 |
| 194200 | 1 | 0 | 0 | 0 | 0 |
| 194202 | 1 | 0 | 0 | 0 | 0 |
| 195196 | 1 | 0 | 0 | 0 | 0 |
| 195197 | 2 | 0 | 0 | 0 | 0 |
| 197198 | 1 | 0 | 0 | 0 | 0 |
| 197199 | 1 | 0 | 0 | 0 | 0 |
| 199200 | 2 | 0 | 0 | 0 | 0 |
| 200201 | 1 | 0 | 0 | 0 | 0 |
| 202203 | 1 | 0 | 0 | 0 | 0 |
| 202204 | 1 | 0 | 0 | 0 | 0 |
| 202205 | 1 | 0 | 0 | 0 | 0 |
| 205206 | 1 | 0 | 0 | 0 | 0 |
| 205207 | 1 | 0 | 0 | 0 | 0 |
| 205208 | 1 | 0 | 0 | 0 | 0 |
| 208209 | 1 | 0 | 0 | 0 | 0 |
| 209210 | 1 | 0 | 0 | 0 | 0 |
| 209211 | 1 | 0 | 0 | 0 | 0 |
| 209212 | 1 | 0 | 0 | 0 | 0 |
| 212213 | 1 | 0 | 0 | 0 | 0 |
| 212214 | 1 | 0 | 0 | 0 | 0 |
| 212215 | 1 | 0 | 0 | 0 | 0 |
| 215216 | 1 | 0 | 0 | 0 | 0 |
| 215220 | 2 | 0 | 0 | 0 | 0 |
| 216217 | 1 | 0 | 0 | 0 | 0 |
| 217218 | 1 | 0 | 0 | 0 | 0 |
| 217219 | 1 | 0 | 0 | 0 | 0 |
| 217221 | 1 | 0 | 0 | 0 | 0 |
| 221222 | 1 | 0 | 0 | 0 | 0 |
| 221223 | 1 | 0 | 0 | 0 | 0 |
| 221239 | 1 | 0 | 0 | 0 | 0 |
| 224225 | 1 | 0 | 0 | 0 | 0 |
| 224226 | 1 | 0 | 0 | 0 | 0 |
| 224227 | 1 | 0 | 0 | 0 | 0 |
| 224239 | 1 | 0 | 0 | 0 | 0 |
| 227228 | 1 | 0 | 0 | 0 | 0 |
| 227229 | 1 | 0 | 0 | 0 | 0 |
| 227230 | 1 | 0 | 0 | 0 | 0 |
| 230231 | 1 | 0 | 0 | 0 | 0 |
| 231232 | 1 | 0 | 0 | 0 | 0 |
| 231238 | 2 | 0 | 0 | 0 | 0 |
| 232233 | 1 | 0 | 0 | 0 | 0 |
| 232234 | 1 | 0 | 0 | 0 | 0 |
| 232235 | 1 | 0 | 0 | 0 | 0 |
| 235236 | 1 | 0 | 0 | 0 | 0 |
| 235237 | 1 | 0 | 0 | 0 | 0 |
| 235256 | 1 | 0 | 0 | 0 | 0 |
| 239240 | 1 | 0 | 0 | 0 | 0 |
| 239241 | 1 | 0 | 0 | 0 | 0 |
| 242243 | 1 | 0 | 0 | 0 | 0 |
| 242248 | 1 | 0 | 0 | 0 | 0 |
| 242250 | 1 | 0 | 0 | 0 | 0 |
| 243244 | 1 | 0 | 0 | 0 | 0 |
| 243245 | 2 | 0 | 0 | 0 | 0 |
| 245246 | 1 | 0 | 0 | 0 | 0 |
| 245247 | 1 | 0 | 0 | 0 | 0 |
| 247248 | 2 | 0 | 0 | 0 | 0 |
| 248249 | 1 | 0 | 0 | 0 | 0 |
| 250251 | 1 | 0 | 0 | 0 | 0 |
| 250252 | 1 | 0 | 0 | 0 | 0 |
| 250253 | 1 | 0 | 0 | 0 | 0 |
| 253254 | 1 | 0 | 0 | 0 | 0 |
| 253255 | 1 | 0 | 0 | 0 | 0 |
| 253256 | 1 | 0 | 0 | 0 | 0 |
| 256257 | 1 | 0 | 0 | 0 | 0 |

M END  
> <NAME>  
JJ94\_12

\$\$\$\$  
LL6\_12  
MOE2012

3D











|         |         |         |   |   |   |   |   |   |   |   |   |   |   |   |   |
|---------|---------|---------|---|---|---|---|---|---|---|---|---|---|---|---|---|
| 85.6160 | 16.2490 | 16.1260 | H | 0 | 0 | 0 | 0 | 0 | 0 | 0 | 0 | 0 | 0 | 0 | 0 |
| 86.5600 | 17.0610 | 17.3650 | H | 0 | 0 | 0 | 0 | 0 | 0 | 0 | 0 | 0 | 0 | 0 | 0 |
| 85.1250 | 18.3410 | 16.3450 | C | 0 | 0 | 0 | 0 | 0 | 0 | 0 | 0 | 0 | 0 | 0 | 0 |
| 85.6480 | 19.2810 | 16.5560 | H | 0 | 0 | 0 | 0 | 0 | 0 | 0 | 0 | 0 | 0 | 0 | 0 |
| 84.6740 | 18.4180 | 15.3510 | H | 0 | 0 | 0 | 0 | 0 | 0 | 0 | 0 | 0 | 0 | 0 | 0 |
| 84.0920 | 18.1110 | 17.3570 | N | 0 | 0 | 3 | 0 | 0 | 0 | 0 | 0 | 0 | 0 | 0 | 0 |
| 83.6240 | 17.2220 | 17.1830 | H | 0 | 0 | 0 | 0 | 0 | 0 | 0 | 0 | 0 | 0 | 0 | 0 |
| 1       | 2       | 1       | 0 | 0 | 0 | 0 |   |   |   |   |   |   |   |   |   |
| 1       | 3       | 1       | 0 | 0 | 0 | 0 |   |   |   |   |   |   |   |   |   |
| 1       | 10      | 1       | 0 | 0 | 0 | 0 |   |   |   |   |   |   |   |   |   |
| 1       | 11      | 1       | 0 | 0 | 0 | 0 |   |   |   |   |   |   |   |   |   |
| 3       | 4       | 1       | 0 | 0 | 0 | 0 |   |   |   |   |   |   |   |   |   |
| 4       | 5       | 1       | 0 | 0 | 0 | 0 |   |   |   |   |   |   |   |   |   |
| 4       | 6       | 1       | 0 | 0 | 0 | 0 |   |   |   |   |   |   |   |   |   |
| 4       | 7       | 1       | 0 | 0 | 0 | 0 |   |   |   |   |   |   |   |   |   |
| 7       | 8       | 1       | 0 | 0 | 0 | 0 |   |   |   |   |   |   |   |   |   |
| 7       | 9       | 1       | 0 | 0 | 0 | 0 |   |   |   |   |   |   |   |   |   |
| 7       | 10      | 1       | 0 | 0 | 0 | 0 |   |   |   |   |   |   |   |   |   |
| 11      | 12      | 1       | 0 | 0 | 0 | 0 |   |   |   |   |   |   |   |   |   |
| 11      | 13      | 1       | 0 | 0 | 0 | 0 |   |   |   |   |   |   |   |   |   |
| 11      | 14      | 1       | 0 | 0 | 0 | 0 |   |   |   |   |   |   |   |   |   |
| 14      | 15      | 1       | 0 | 0 | 0 | 0 |   |   |   |   |   |   |   |   |   |
| 14      | 16      | 1       | 0 | 0 | 0 | 0 |   |   |   |   |   |   |   |   |   |
| 14      | 17      | 1       | 0 | 0 | 0 | 0 |   |   |   |   |   |   |   |   |   |
| 17      | 18      | 1       | 0 | 0 | 0 | 0 |   |   |   |   |   |   |   |   |   |
| 17      | 19      | 1       | 0 | 0 | 0 | 0 |   |   |   |   |   |   |   |   |   |
| 19      | 20      | 1       | 0 | 0 | 0 | 0 |   |   |   |   |   |   |   |   |   |
| 19      | 21      | 1       | 0 | 0 | 0 | 0 |   |   |   |   |   |   |   |   |   |
| 19      | 22      | 1       | 0 | 0 | 0 | 0 |   |   |   |   |   |   |   |   |   |
| 22      | 23      | 1       | 0 | 0 | 0 | 0 |   |   |   |   |   |   |   |   |   |
| 22      | 24      | 1       | 0 | 0 | 0 | 0 |   |   |   |   |   |   |   |   |   |
| 22      | 25      | 1       | 0 | 0 | 0 | 0 |   |   |   |   |   |   |   |   |   |
| 25      | 26      | 1       | 0 | 0 | 0 | 0 |   |   |   |   |   |   |   |   |   |
| 25      | 30      | 2       | 0 | 0 | 0 | 0 |   |   |   |   |   |   |   |   |   |
| 26      | 27      | 1       | 0 | 0 | 0 | 0 |   |   |   |   |   |   |   |   |   |
| 27      | 28      | 1       | 0 | 0 | 0 | 0 |   |   |   |   |   |   |   |   |   |
| 27      | 29      | 1       | 0 | 0 | 0 | 0 |   |   |   |   |   |   |   |   |   |
| 27      | 31      | 1       | 0 | 0 | 0 | 0 |   |   |   |   |   |   |   |   |   |
| 31      | 32      | 1       | 0 | 0 | 0 | 0 |   |   |   |   |   |   |   |   |   |
| 31      | 33      | 1       | 0 | 0 | 0 | 0 |   |   |   |   |   |   |   |   |   |
| 31      | 34      | 1       | 0 | 0 | 0 | 0 |   |   |   |   |   |   |   |   |   |
| 34      | 35      | 1       | 0 | 0 | 0 | 0 |   |   |   |   |   |   |   |   |   |
| 34      | 36      | 1       | 0 | 0 | 0 | 0 |   |   |   |   |   |   |   |   |   |
| 34      | 37      | 1       | 0 | 0 | 0 | 0 |   |   |   |   |   |   |   |   |   |
| 37      | 38      | 1       | 0 | 0 | 0 | 0 |   |   |   |   |   |   |   |   |   |
| 37      | 39      | 1       | 0 | 0 | 0 | 0 |   |   |   |   |   |   |   |   |   |
| 37      | 40      | 1       | 0 | 0 | 0 | 0 |   |   |   |   |   |   |   |   |   |
| 40      | 41      | 1       | 0 | 0 | 0 | 0 |   |   |   |   |   |   |   |   |   |
| 40      | 42      | 1       | 0 | 0 | 0 | 0 |   |   |   |   |   |   |   |   |   |
| 40      | 43      | 1       | 0 | 0 | 0 | 0 |   |   |   |   |   |   |   |   |   |
| 43      | 44      | 1       | 0 | 0 | 0 | 0 |   |   |   |   |   |   |   |   |   |
| 43      | 45      | 1       | 0 | 0 | 0 | 0 |   |   |   |   |   |   |   |   |   |
| 43      | 46      | 1       | 0 | 0 | 0 | 0 |   |   |   |   |   |   |   |   |   |
| 46      | 47      | 1       | 0 | 0 | 0 | 0 |   |   |   |   |   |   |   |   |   |
| 46      | 48      | 1       | 0 | 0 | 0 | 0 |   |   |   |   |   |   |   |   |   |
| 46      | 49      | 1       | 0 | 0 | 0 | 0 |   |   |   |   |   |   |   |   |   |
| 49      | 50      | 1       | 0 | 0 | 0 | 0 |   |   |   |   |   |   |   |   |   |
| 49      | 51      | 1       | 0 | 0 | 0 | 0 |   |   |   |   |   |   |   |   |   |
| 49      | 52      | 1       | 0 | 0 | 0 | 0 |   |   |   |   |   |   |   |   |   |
| 52      | 53      | 1       | 0 | 0 | 0 | 0 |   |   |   |   |   |   |   |   |   |
| 52      | 54      | 1       | 0 | 0 | 0 | 0 |   |   |   |   |   |   |   |   |   |
| 52      | 55      | 1       | 0 | 0 | 0 | 0 |   |   |   |   |   |   |   |   |   |
| 55      | 56      | 1       | 0 | 0 | 0 | 0 |   |   |   |   |   |   |   |   |   |
| 56      | 57      | 1       | 0 | 0 | 0 | 0 |   |   |   |   |   |   |   |   |   |
| 56      | 63      | 2       | 0 | 0 | 0 | 0 |   |   |   |   |   |   |   |   |   |
| 57      | 58      | 1       | 0 | 0 | 0 | 0 |   |   |   |   |   |   |   |   |   |
| 57      | 59      | 1       | 0 | 0 | 0 | 0 |   |   |   |   |   |   |   |   |   |
| 57      | 60      | 1       | 0 | 0 | 0 | 0 |   |   |   |   |   |   |   |   |   |
| 60      | 61      | 1       | 0 | 0 | 0 | 0 |   |   |   |   |   |   |   |   |   |
| 60      | 62      | 1       | 0 | 0 | 0 | 0 |   |   |   |   |   |   |   |   |   |
| 60      | 80      | 1       | 0 | 0 | 0 | 0 |   |   |   |   |   |   |   |   |   |
| 64      | 65      | 1       | 0 | 0 | 0 | 0 |   |   |   |   |   |   |   |   |   |
| 64      | 66      | 1       | 0 | 0 | 0 | 0 |   |   |   |   |   |   |   |   |   |
| 64      | 73      | 1       | 0 | 0 | 0 | 0 |   |   |   |   |   |   |   |   |   |
| 64      | 74      | 1       | 0 | 0 | 0 | 0 |   |   |   |   |   |   |   |   |   |
| 66      | 67      | 1       | 0 | 0 | 0 | 0 |   |   |   |   |   |   |   |   |   |
| 67      | 68      | 1       | 0 | 0 | 0 | 0 |   |   |   |   |   |   |   |   |   |
| 67      | 69      | 1       | 0 | 0 | 0 | 0 |   |   |   |   |   |   |   |   |   |
| 67      | 70      | 1       | 0 | 0 | 0 | 0 |   |   |   |   |   |   |   |   |   |
| 70      | 71      | 1       | 0 | 0 | 0 | 0 |   |   |   |   |   |   |   |   |   |
| 70      | 72      | 1       | 0 | 0 | 0 | 0 |   |   |   |   |   |   |   |   |   |

|     |     |   |   |   |   |   |
|-----|-----|---|---|---|---|---|
| 70  | 73  | 1 | 0 | 0 | 0 | 0 |
| 74  | 75  | 1 | 0 | 0 | 0 | 0 |
| 74  | 76  | 1 | 0 | 0 | 0 | 0 |
| 74  | 77  | 1 | 0 | 0 | 0 | 0 |
| 77  | 78  | 1 | 0 | 0 | 0 | 0 |
| 77  | 79  | 1 | 0 | 0 | 0 | 0 |
| 77  | 80  | 1 | 0 | 0 | 0 | 0 |
| 80  | 81  | 1 | 0 | 0 | 0 | 0 |
| 81  | 82  | 1 | 0 | 0 | 0 | 0 |
| 81  | 83  | 1 | 0 | 0 | 0 | 0 |
| 81  | 84  | 1 | 0 | 0 | 0 | 0 |
| 84  | 85  | 1 | 0 | 0 | 0 | 0 |
| 84  | 86  | 1 | 0 | 0 | 0 | 0 |
| 84  | 87  | 1 | 0 | 0 | 0 | 0 |
| 87  | 88  | 1 | 0 | 0 | 0 | 0 |
| 87  | 92  | 2 | 0 | 0 | 0 | 0 |
| 88  | 89  | 1 | 0 | 0 | 0 | 0 |
| 89  | 90  | 1 | 0 | 0 | 0 | 0 |
| 89  | 91  | 1 | 0 | 0 | 0 | 0 |
| 89  | 93  | 1 | 0 | 0 | 0 | 0 |
| 93  | 94  | 1 | 0 | 0 | 0 | 0 |
| 93  | 95  | 1 | 0 | 0 | 0 | 0 |
| 93  | 96  | 1 | 0 | 0 | 0 | 0 |
| 96  | 97  | 1 | 0 | 0 | 0 | 0 |
| 96  | 98  | 1 | 0 | 0 | 0 | 0 |
| 96  | 99  | 1 | 0 | 0 | 0 | 0 |
| 99  | 100 | 1 | 0 | 0 | 0 | 0 |
| 99  | 101 | 1 | 0 | 0 | 0 | 0 |
| 99  | 102 | 1 | 0 | 0 | 0 | 0 |
| 102 | 103 | 1 | 0 | 0 | 0 | 0 |
| 102 | 104 | 1 | 0 | 0 | 0 | 0 |
| 102 | 105 | 1 | 0 | 0 | 0 | 0 |
| 105 | 106 | 1 | 0 | 0 | 0 | 0 |
| 105 | 107 | 1 | 0 | 0 | 0 | 0 |
| 105 | 108 | 1 | 0 | 0 | 0 | 0 |
| 108 | 109 | 1 | 0 | 0 | 0 | 0 |
| 108 | 110 | 1 | 0 | 0 | 0 | 0 |
| 108 | 111 | 1 | 0 | 0 | 0 | 0 |
| 111 | 112 | 1 | 0 | 0 | 0 | 0 |
| 111 | 113 | 1 | 0 | 0 | 0 | 0 |
| 111 | 114 | 1 | 0 | 0 | 0 | 0 |
| 114 | 115 | 1 | 0 | 0 | 0 | 0 |
| 114 | 116 | 1 | 0 | 0 | 0 | 0 |
| 114 | 117 | 1 | 0 | 0 | 0 | 0 |
| 117 | 118 | 1 | 0 | 0 | 0 | 0 |
| 118 | 119 | 1 | 0 | 0 | 0 | 0 |
| 118 | 125 | 2 | 0 | 0 | 0 | 0 |
| 119 | 120 | 1 | 0 | 0 | 0 | 0 |
| 119 | 121 | 1 | 0 | 0 | 0 | 0 |
| 119 | 122 | 1 | 0 | 0 | 0 | 0 |
| 122 | 123 | 1 | 0 | 0 | 0 | 0 |
| 122 | 124 | 1 | 0 | 0 | 0 | 0 |
| 122 | 142 | 1 | 0 | 0 | 0 | 0 |
| 126 | 127 | 1 | 0 | 0 | 0 | 0 |
| 126 | 128 | 1 | 0 | 0 | 0 | 0 |
| 126 | 135 | 1 | 0 | 0 | 0 | 0 |
| 126 | 136 | 1 | 0 | 0 | 0 | 0 |
| 128 | 129 | 1 | 0 | 0 | 0 | 0 |
| 129 | 130 | 1 | 0 | 0 | 0 | 0 |
| 129 | 131 | 1 | 0 | 0 | 0 | 0 |
| 129 | 132 | 1 | 0 | 0 | 0 | 0 |
| 132 | 133 | 1 | 0 | 0 | 0 | 0 |
| 132 | 134 | 1 | 0 | 0 | 0 | 0 |
| 132 | 135 | 1 | 0 | 0 | 0 | 0 |
| 136 | 137 | 1 | 0 | 0 | 0 | 0 |
| 136 | 138 | 1 | 0 | 0 | 0 | 0 |
| 136 | 139 | 1 | 0 | 0 | 0 | 0 |
| 139 | 140 | 1 | 0 | 0 | 0 | 0 |
| 139 | 141 | 1 | 0 | 0 | 0 | 0 |
| 139 | 142 | 1 | 0 | 0 | 0 | 0 |
| 142 | 143 | 1 | 0 | 0 | 0 | 0 |
| 143 | 144 | 1 | 0 | 0 | 0 | 0 |
| 143 | 145 | 1 | 0 | 0 | 0 | 0 |
| 143 | 146 | 1 | 0 | 0 | 0 | 0 |
| 146 | 147 | 1 | 0 | 0 | 0 | 0 |
| 146 | 148 | 1 | 0 | 0 | 0 | 0 |
| 146 | 149 | 1 | 0 | 0 | 0 | 0 |
| 149 | 150 | 1 | 0 | 0 | 0 | 0 |
| 149 | 154 | 2 | 0 | 0 | 0 | 0 |
| 150 | 151 | 1 | 0 | 0 | 0 | 0 |
| 151 | 152 | 1 | 0 | 0 | 0 | 0 |

|        |   |   |   |   |   |
|--------|---|---|---|---|---|
| 151153 | 1 | 0 | 0 | 0 | 0 |
| 151155 | 1 | 0 | 0 | 0 | 0 |
| 155156 | 1 | 0 | 0 | 0 | 0 |
| 155157 | 1 | 0 | 0 | 0 | 0 |
| 155158 | 1 | 0 | 0 | 0 | 0 |
| 158159 | 1 | 0 | 0 | 0 | 0 |
| 158160 | 1 | 0 | 0 | 0 | 0 |
| 158161 | 1 | 0 | 0 | 0 | 0 |
| 161162 | 1 | 0 | 0 | 0 | 0 |
| 161163 | 1 | 0 | 0 | 0 | 0 |
| 161164 | 1 | 0 | 0 | 0 | 0 |
| 164165 | 1 | 0 | 0 | 0 | 0 |
| 164166 | 1 | 0 | 0 | 0 | 0 |
| 164167 | 1 | 0 | 0 | 0 | 0 |
| 167168 | 1 | 0 | 0 | 0 | 0 |
| 167169 | 1 | 0 | 0 | 0 | 0 |
| 167170 | 1 | 0 | 0 | 0 | 0 |
| 170171 | 1 | 0 | 0 | 0 | 0 |
| 170172 | 1 | 0 | 0 | 0 | 0 |
| 170173 | 1 | 0 | 0 | 0 | 0 |
| 173174 | 1 | 0 | 0 | 0 | 0 |
| 173175 | 1 | 0 | 0 | 0 | 0 |
| 173176 | 1 | 0 | 0 | 0 | 0 |
| 176177 | 1 | 0 | 0 | 0 | 0 |
| 176178 | 1 | 0 | 0 | 0 | 0 |
| 176179 | 1 | 0 | 0 | 0 | 0 |
| 179180 | 1 | 0 | 0 | 0 | 0 |
| 180181 | 1 | 0 | 0 | 0 | 0 |
| 180187 | 2 | 0 | 0 | 0 | 0 |
| 181182 | 1 | 0 | 0 | 0 | 0 |
| 181183 | 1 | 0 | 0 | 0 | 0 |
| 181184 | 1 | 0 | 0 | 0 | 0 |
| 184185 | 1 | 0 | 0 | 0 | 0 |
| 184186 | 1 | 0 | 0 | 0 | 0 |
| 184204 | 1 | 0 | 0 | 0 | 0 |
| 188189 | 1 | 0 | 0 | 0 | 0 |
| 188190 | 1 | 0 | 0 | 0 | 0 |
| 188197 | 1 | 0 | 0 | 0 | 0 |
| 188198 | 1 | 0 | 0 | 0 | 0 |
| 190191 | 1 | 0 | 0 | 0 | 0 |
| 191192 | 1 | 0 | 0 | 0 | 0 |
| 191193 | 1 | 0 | 0 | 0 | 0 |
| 191194 | 1 | 0 | 0 | 0 | 0 |
| 194195 | 1 | 0 | 0 | 0 | 0 |
| 194196 | 1 | 0 | 0 | 0 | 0 |
| 194197 | 1 | 0 | 0 | 0 | 0 |
| 198199 | 1 | 0 | 0 | 0 | 0 |
| 198200 | 1 | 0 | 0 | 0 | 0 |
| 198201 | 1 | 0 | 0 | 0 | 0 |
| 201202 | 1 | 0 | 0 | 0 | 0 |
| 201203 | 1 | 0 | 0 | 0 | 0 |
| 201204 | 1 | 0 | 0 | 0 | 0 |
| 204205 | 1 | 0 | 0 | 0 | 0 |
| 205206 | 1 | 0 | 0 | 0 | 0 |
| 205207 | 1 | 0 | 0 | 0 | 0 |
| 205208 | 1 | 0 | 0 | 0 | 0 |
| 208209 | 1 | 0 | 0 | 0 | 0 |
| 208210 | 1 | 0 | 0 | 0 | 0 |
| 208211 | 1 | 0 | 0 | 0 | 0 |
| 211212 | 1 | 0 | 0 | 0 | 0 |
| 211216 | 2 | 0 | 0 | 0 | 0 |
| 212213 | 1 | 0 | 0 | 0 | 0 |
| 213214 | 1 | 0 | 0 | 0 | 0 |
| 213215 | 1 | 0 | 0 | 0 | 0 |
| 213217 | 1 | 0 | 0 | 0 | 0 |
| 217218 | 1 | 0 | 0 | 0 | 0 |
| 217219 | 1 | 0 | 0 | 0 | 0 |
| 217220 | 1 | 0 | 0 | 0 | 0 |
| 220221 | 1 | 0 | 0 | 0 | 0 |
| 220222 | 1 | 0 | 0 | 0 | 0 |
| 220223 | 1 | 0 | 0 | 0 | 0 |
| 223224 | 1 | 0 | 0 | 0 | 0 |
| 223225 | 1 | 0 | 0 | 0 | 0 |
| 223226 | 1 | 0 | 0 | 0 | 0 |
| 226227 | 1 | 0 | 0 | 0 | 0 |
| 226228 | 1 | 0 | 0 | 0 | 0 |
| 226229 | 1 | 0 | 0 | 0 | 0 |
| 229230 | 1 | 0 | 0 | 0 | 0 |
| 229231 | 1 | 0 | 0 | 0 | 0 |
| 229232 | 1 | 0 | 0 | 0 | 0 |
| 232233 | 1 | 0 | 0 | 0 | 0 |

|        |   |   |   |   |   |
|--------|---|---|---|---|---|
| 232234 | 1 | 0 | 0 | 0 | 0 |
| 232235 | 1 | 0 | 0 | 0 | 0 |
| 235236 | 1 | 0 | 0 | 0 | 0 |
| 235237 | 1 | 0 | 0 | 0 | 0 |
| 235238 | 1 | 0 | 0 | 0 | 0 |
| 238239 | 1 | 0 | 0 | 0 | 0 |
| 238240 | 1 | 0 | 0 | 0 | 0 |
| 238241 | 1 | 0 | 0 | 0 | 0 |
| 241242 | 1 | 0 | 0 | 0 | 0 |
| 242243 | 1 | 0 | 0 | 0 | 0 |
| 242249 | 2 | 0 | 0 | 0 | 0 |
| 243244 | 1 | 0 | 0 | 0 | 0 |
| 243245 | 1 | 0 | 0 | 0 | 0 |
| 243246 | 1 | 0 | 0 | 0 | 0 |
| 246247 | 1 | 0 | 0 | 0 | 0 |
| 246248 | 1 | 0 | 0 | 0 | 0 |
| 246266 | 1 | 0 | 0 | 0 | 0 |
| 250251 | 1 | 0 | 0 | 0 | 0 |
| 250252 | 1 | 0 | 0 | 0 | 0 |
| 250259 | 1 | 0 | 0 | 0 | 0 |
| 250260 | 1 | 0 | 0 | 0 | 0 |
| 252253 | 1 | 0 | 0 | 0 | 0 |
| 253254 | 1 | 0 | 0 | 0 | 0 |
| 253255 | 1 | 0 | 0 | 0 | 0 |
| 253256 | 1 | 0 | 0 | 0 | 0 |
| 256257 | 1 | 0 | 0 | 0 | 0 |
| 256258 | 1 | 0 | 0 | 0 | 0 |
| 256259 | 1 | 0 | 0 | 0 | 0 |
| 260261 | 1 | 0 | 0 | 0 | 0 |
| 260262 | 1 | 0 | 0 | 0 | 0 |
| 260263 | 1 | 0 | 0 | 0 | 0 |
| 263264 | 1 | 0 | 0 | 0 | 0 |
| 263265 | 1 | 0 | 0 | 0 | 0 |
| 263266 | 1 | 0 | 0 | 0 | 0 |
| 266267 | 1 | 0 | 0 | 0 | 0 |
| 267268 | 1 | 0 | 0 | 0 | 0 |
| 267269 | 1 | 0 | 0 | 0 | 0 |
| 267270 | 1 | 0 | 0 | 0 | 0 |
| 270271 | 1 | 0 | 0 | 0 | 0 |
| 270272 | 1 | 0 | 0 | 0 | 0 |
| 270273 | 1 | 0 | 0 | 0 | 0 |
| 273274 | 1 | 0 | 0 | 0 | 0 |
| 273278 | 2 | 0 | 0 | 0 | 0 |
| 274275 | 1 | 0 | 0 | 0 | 0 |
| 275276 | 1 | 0 | 0 | 0 | 0 |
| 275277 | 1 | 0 | 0 | 0 | 0 |
| 275279 | 1 | 0 | 0 | 0 | 0 |
| 279280 | 1 | 0 | 0 | 0 | 0 |
| 279281 | 1 | 0 | 0 | 0 | 0 |
| 279282 | 1 | 0 | 0 | 0 | 0 |
| 282283 | 1 | 0 | 0 | 0 | 0 |
| 282284 | 1 | 0 | 0 | 0 | 0 |
| 282285 | 1 | 0 | 0 | 0 | 0 |
| 285286 | 1 | 0 | 0 | 0 | 0 |
| 285287 | 1 | 0 | 0 | 0 | 0 |
| 285288 | 1 | 0 | 0 | 0 | 0 |
| 288289 | 1 | 0 | 0 | 0 | 0 |
| 288290 | 1 | 0 | 0 | 0 | 0 |
| 288291 | 1 | 0 | 0 | 0 | 0 |
| 291292 | 1 | 0 | 0 | 0 | 0 |
| 291293 | 1 | 0 | 0 | 0 | 0 |
| 291294 | 1 | 0 | 0 | 0 | 0 |
| 294295 | 1 | 0 | 0 | 0 | 0 |
| 294296 | 1 | 0 | 0 | 0 | 0 |
| 294297 | 1 | 0 | 0 | 0 | 0 |
| 297298 | 1 | 0 | 0 | 0 | 0 |
| 297299 | 1 | 0 | 0 | 0 | 0 |
| 297300 | 1 | 0 | 0 | 0 | 0 |
| 300301 | 1 | 0 | 0 | 0 | 0 |
| 300302 | 1 | 0 | 0 | 0 | 0 |
| 300303 | 1 | 0 | 0 | 0 | 0 |
| 303304 | 1 | 0 | 0 | 0 | 0 |
| 304305 | 1 | 0 | 0 | 0 | 0 |
| 304311 | 2 | 0 | 0 | 0 | 0 |
| 305306 | 1 | 0 | 0 | 0 | 0 |
| 305307 | 1 | 0 | 0 | 0 | 0 |
| 305308 | 1 | 0 | 0 | 0 | 0 |
| 308309 | 1 | 0 | 0 | 0 | 0 |
| 308310 | 1 | 0 | 0 | 0 | 0 |
| 308328 | 1 | 0 | 0 | 0 | 0 |
| 312313 | 1 | 0 | 0 | 0 | 0 |

312314 1 0 0 0 0  
312321 1 0 0 0 0  
312322 1 0 0 0 0  
314315 1 0 0 0 0  
315316 1 0 0 0 0  
315317 1 0 0 0 0  
315318 1 0 0 0 0  
318319 1 0 0 0 0  
318320 1 0 0 0 0  
318321 1 0 0 0 0  
322323 1 0 0 0 0  
322324 1 0 0 0 0  
322325 1 0 0 0 0  
325326 1 0 0 0 0  
325327 1 0 0 0 0  
325328 1 0 0 0 0  
328329 1 0 0 0 0

M END  
> <NAME>  
LL6\_12

\$\$\$  
LL8\_12  
MOE2012 3D

359358 0 0 1 0 0 0 0 0999 V2000  
39.4560 8.2430 34.9810 C 0 0 0 0 0 0 0 0 0 0 0 0 0 0 0 0 0 0  
39.6090 8.6380 33.9690 H 0 0 0 0 0 0 0 0 0 0 0 0 0 0 0 0 0 0  
38.9030 9.0030 35.5470 H 0 0 0 0 0 0 0 0 0 0 0 0 0 0 0 0 0 0  
38.6340 6.9500 34.9130 C 0 0 0 0 0 0 0 0 0 0 0 0 0 0 0 0 0 0  
39.1950 6.1950 34.3520 H 0 0 0 0 0 0 0 0 0 0 0 0 0 0 0 0 0 0  
38.4810 6.5740 35.9310 H 0 0 0 0 0 0 0 0 0 0 0 0 0 0 0 0 0 0  
37.3420 7.2080 34.2660 N 0 0 3 0 0 0 0 0 0 0 0 0 0 0 0 0 0 0  
36.8950 7.9950 34.7390 H 0 0 0 0 0 0 0 0 0 0 0 0 0 0 0 0 0 0  
41.6580 9.2800 35.7490 C 0 0 0 0 0 0 0 0 0 0 0 0 0 0 0 0 0 0  
41.6760 9.7530 34.7590 H 0 0 0 0 0 0 0 0 0 0 0 0 0 0 0 0 0 0  
43.0210 8.9940 36.0800 O 0 0 0 0 0 0 0 0 0 0 0 0 0 0 0 0 0 0  
43.2110 8.4000 37.3570 C 0 0 0 0 0 0 0 0 0 0 0 0 0 0 0 0 0 0  
42.8200 7.3790 37.3730 H 0 0 0 0 0 0 0 0 0 0 0 0 0 0 0 0 0 0  
42.7500 8.9970 38.1490 H 0 0 0 0 0 0 0 0 0 0 0 0 0 0 0 0 0 0  
44.2860 8.3500 37.5490 H 0 0 0 0 0 0 0 0 0 0 0 0 0 0 0 0 0 0  
41.5990 11.4830 36.6080 C 0 0 0 0 0 0 0 0 0 0 0 0 0 0 0 0 0 0  
41.4520 11.9110 35.6120 H 0 0 0 0 0 0 0 0 0 0 0 0 0 0 0 0 0 0  
42.6630 11.4690 36.8600 H 0 0 0 0 0 0 0 0 0 0 0 0 0 0 0 0 0 0  
41.0800 12.1140 37.3350 H 0 0 0 0 0 0 0 0 0 0 0 0 0 0 0 0 0 0  
41.0430 10.1770 36.6770 O 0 0 0 0 0 0 0 0 0 0 0 0 0 0 0 0 0 0  
40.8180 7.9970 35.6440 C 0 0 0 0 0 0 0 0 0 0 0 0 0 0 0 0 0 0  
40.6450 7.5860 36.6460 H 0 0 0 0 0 0 0 0 0 0 0 0 0 0 0 0 0 0  
41.3760 7.2400 35.0800 H 0 0 0 0 0 0 0 0 0 0 0 0 0 0 0 0 0 0  
36.4390 6.0510 34.3390 C 0 0 0 0 0 0 0 0 0 0 0 0 0 0 0 0 0 0  
35.4130 6.4170 34.2150 H 0 0 0 0 0 0 0 0 0 0 0 0 0 0 0 0 0 0  
36.4770 5.6110 35.3430 H 0 0 0 0 0 0 0 0 0 0 0 0 0 0 0 0 0 0  
36.7340 4.9760 33.2940 C 0 0 0 0 0 0 0 0 0 0 0 0 0 0 0 0 0 0  
37.8110 4.8040 33.1970 H 0 0 0 0 0 0 0 0 0 0 0 0 0 0 0 0 0 0  
36.2760 4.0320 33.6150 H 0 0 0 0 0 0 0 0 0 0 0 0 0 0 0 0 0 0  
36.1480 5.2980 31.9390 C 0 0 0 0 0 0 0 0 0 0 0 0 0 0 0 0 0 0  
36.7910 4.5660 30.9810 O 0 0 0 0 0 0 0 0 0 0 0 0 0 0 0 0 0 0  
36.2850 4.7440 29.6490 C 0 0 0 0 0 0 0 0 0 0 0 0 0 0 0 0 0 0  
35.2370 4.4240 29.6140 H 0 0 0 0 0 0 0 0 0 0 0 0 0 0 0 0 0 0  
36.3560 5.8010 29.3700 H 0 0 0 0 0 0 0 0 0 0 0 0 0 0 0 0 0 0  
35.1950 6.0370 31.7310 O 0 0 0 0 0 0 0 0 0 0 0 0 0 0 0 0 0 0  
37.1280 3.8930 28.7060 C 0 0 0 0 0 0 0 0 0 0 0 0 0 0 0 0 0 0  
38.1800 4.1900 28.7940 H 0 0 0 0 0 0 0 0 0 0 0 0 0 0 0 0 0 0  
37.0850 2.8440 29.0280 H 0 0 0 0 0 0 0 0 0 0 0 0 0 0 0 0 0 0  
36.6600 4.0220 27.2580 C 0 0 0 0 0 0 0 0 0 0 0 0 0 0 0 0 0 0  
35.6120 3.7090 27.1810 H 0 0 0 0 0 0 0 0 0 0 0 0 0 0 0 0 0 0  
36.7080 5.0730 26.9500 H 0 0 0 0 0 0 0 0 0 0 0 0 0 0 0 0 0 0  
37.5190 3.1730 26.3190 C 0 0 0 0 0 0 0 0 0 0 0 0 0 0 0 0 0 0  
38.5670 3.4840 26.3990 H 0 0 0 0 0 0 0 0 0 0 0 0 0 0 0 0 0 0  
37.4690 2.1210 26.6250 H 0 0 0 0 0 0 0 0 0 0 0 0 0 0 0 0 0 0  
37.0550 3.3070 24.8670 C 0 0 0 0 0 0 0 0 0 0 0 0 0 0 0 0 0 0  
36.0090 2.9870 24.7840 H 0 0 0 0 0 0 0 0 0 0 0 0 0 0 0 0 0 0  
37.0960 4.3600 24.5640 H 0 0 0 0 0 0 0 0 0 0 0 0 0 0 0 0 0 0  
37.9230 2.4690 23.9260 C 0 0 0 0 0 0 0 0 0 0 0 0 0 0 0 0 0 0  
38.9700 2.7850 24.0140 H 0 0 0 0 0 0 0 0 0 0 0 0 0 0 0 0 0 0  
37.8780 1.4140 24.2260 H 0 0 0 0 0 0 0 0 0 0 0 0 0 0 0 0 0 0  
37.4670 2.6090 22.4730 C 0 0 0 0 0 0 0 0 0 0 0 0 0 0 0 0 0 0  
36.4230 2.2830 22.3820 H 0 0 0 0 0 0 0 0 0 0 0 0 0 0 0 0 0 0  
37.5020 3.6650 22.1770 H 0 0 0 0 0 0 0 0 0 0 0 0 0 0 0 0 0 0  
38.3440 1.7860 21.5330 C 0 0 0 0 0 0 0 0 0 0 0 0 0 0 0 0 0 0  
39.3930 2.0940 21.6260 H 0 0 0 0 0 0 0 0 0 0 0 0 0 0 0 0 0 0











|    |     |   |   |   |   |   |
|----|-----|---|---|---|---|---|
| 16 | 20  | 1 | 0 | 0 | 0 | 0 |
| 21 | 22  | 1 | 0 | 0 | 0 | 0 |
| 21 | 23  | 1 | 0 | 0 | 0 | 0 |
| 24 | 25  | 1 | 0 | 0 | 0 | 0 |
| 24 | 26  | 1 | 0 | 0 | 0 | 0 |
| 24 | 27  | 1 | 0 | 0 | 0 | 0 |
| 27 | 28  | 1 | 0 | 0 | 0 | 0 |
| 27 | 29  | 1 | 0 | 0 | 0 | 0 |
| 27 | 30  | 1 | 0 | 0 | 0 | 0 |
| 30 | 31  | 1 | 0 | 0 | 0 | 0 |
| 30 | 35  | 2 | 0 | 0 | 0 | 0 |
| 31 | 32  | 1 | 0 | 0 | 0 | 0 |
| 32 | 33  | 1 | 0 | 0 | 0 | 0 |
| 32 | 34  | 1 | 0 | 0 | 0 | 0 |
| 32 | 36  | 1 | 0 | 0 | 0 | 0 |
| 36 | 37  | 1 | 0 | 0 | 0 | 0 |
| 36 | 38  | 1 | 0 | 0 | 0 | 0 |
| 36 | 39  | 1 | 0 | 0 | 0 | 0 |
| 39 | 40  | 1 | 0 | 0 | 0 | 0 |
| 39 | 41  | 1 | 0 | 0 | 0 | 0 |
| 39 | 42  | 1 | 0 | 0 | 0 | 0 |
| 42 | 43  | 1 | 0 | 0 | 0 | 0 |
| 42 | 44  | 1 | 0 | 0 | 0 | 0 |
| 42 | 45  | 1 | 0 | 0 | 0 | 0 |
| 45 | 46  | 1 | 0 | 0 | 0 | 0 |
| 45 | 47  | 1 | 0 | 0 | 0 | 0 |
| 45 | 48  | 1 | 0 | 0 | 0 | 0 |
| 48 | 49  | 1 | 0 | 0 | 0 | 0 |
| 48 | 50  | 1 | 0 | 0 | 0 | 0 |
| 48 | 51  | 1 | 0 | 0 | 0 | 0 |
| 51 | 52  | 1 | 0 | 0 | 0 | 0 |
| 51 | 53  | 1 | 0 | 0 | 0 | 0 |
| 51 | 54  | 1 | 0 | 0 | 0 | 0 |
| 54 | 55  | 1 | 0 | 0 | 0 | 0 |
| 54 | 56  | 1 | 0 | 0 | 0 | 0 |
| 54 | 57  | 1 | 0 | 0 | 0 | 0 |
| 57 | 58  | 1 | 0 | 0 | 0 | 0 |
| 57 | 59  | 1 | 0 | 0 | 0 | 0 |
| 57 | 60  | 1 | 0 | 0 | 0 | 0 |
| 60 | 61  | 1 | 0 | 0 | 0 | 0 |
| 61 | 62  | 1 | 0 | 0 | 0 | 0 |
| 61 | 68  | 2 | 0 | 0 | 0 | 0 |
| 62 | 63  | 1 | 0 | 0 | 0 | 0 |
| 62 | 64  | 1 | 0 | 0 | 0 | 0 |
| 62 | 65  | 1 | 0 | 0 | 0 | 0 |
| 65 | 66  | 1 | 0 | 0 | 0 | 0 |
| 65 | 67  | 1 | 0 | 0 | 0 | 0 |
| 65 | 75  | 1 | 0 | 0 | 0 | 0 |
| 69 | 70  | 1 | 0 | 0 | 0 | 0 |
| 69 | 71  | 1 | 0 | 0 | 0 | 0 |
| 69 | 72  | 1 | 0 | 0 | 0 | 0 |
| 69 | 88  | 1 | 0 | 0 | 0 | 0 |
| 72 | 73  | 1 | 0 | 0 | 0 | 0 |
| 72 | 74  | 1 | 0 | 0 | 0 | 0 |
| 72 | 75  | 1 | 0 | 0 | 0 | 0 |
| 75 | 91  | 1 | 0 | 0 | 0 | 0 |
| 76 | 77  | 1 | 0 | 0 | 0 | 0 |
| 76 | 78  | 1 | 0 | 0 | 0 | 0 |
| 76 | 87  | 1 | 0 | 0 | 0 | 0 |
| 76 | 88  | 1 | 0 | 0 | 0 | 0 |
| 78 | 79  | 1 | 0 | 0 | 0 | 0 |
| 79 | 80  | 1 | 0 | 0 | 0 | 0 |
| 79 | 81  | 1 | 0 | 0 | 0 | 0 |
| 79 | 82  | 1 | 0 | 0 | 0 | 0 |
| 83 | 84  | 1 | 0 | 0 | 0 | 0 |
| 83 | 85  | 1 | 0 | 0 | 0 | 0 |
| 83 | 86  | 1 | 0 | 0 | 0 | 0 |
| 83 | 87  | 1 | 0 | 0 | 0 | 0 |
| 88 | 89  | 1 | 0 | 0 | 0 | 0 |
| 88 | 90  | 1 | 0 | 0 | 0 | 0 |
| 91 | 92  | 1 | 0 | 0 | 0 | 0 |
| 91 | 93  | 1 | 0 | 0 | 0 | 0 |
| 91 | 94  | 1 | 0 | 0 | 0 | 0 |
| 94 | 95  | 1 | 0 | 0 | 0 | 0 |
| 94 | 96  | 1 | 0 | 0 | 0 | 0 |
| 94 | 97  | 1 | 0 | 0 | 0 | 0 |
| 97 | 98  | 1 | 0 | 0 | 0 | 0 |
| 97 | 102 | 2 | 0 | 0 | 0 | 0 |
| 98 | 99  | 1 | 0 | 0 | 0 | 0 |
| 99 | 100 | 1 | 0 | 0 | 0 | 0 |
| 99 | 101 | 1 | 0 | 0 | 0 | 0 |

|        |   |   |   |   |   |
|--------|---|---|---|---|---|
| 99103  | 1 | 0 | 0 | 0 | 0 |
| 103104 | 1 | 0 | 0 | 0 | 0 |
| 103105 | 1 | 0 | 0 | 0 | 0 |
| 103106 | 1 | 0 | 0 | 0 | 0 |
| 106107 | 1 | 0 | 0 | 0 | 0 |
| 106108 | 1 | 0 | 0 | 0 | 0 |
| 106109 | 1 | 0 | 0 | 0 | 0 |
| 109110 | 1 | 0 | 0 | 0 | 0 |
| 109111 | 1 | 0 | 0 | 0 | 0 |
| 109112 | 1 | 0 | 0 | 0 | 0 |
| 112113 | 1 | 0 | 0 | 0 | 0 |
| 112114 | 1 | 0 | 0 | 0 | 0 |
| 112115 | 1 | 0 | 0 | 0 | 0 |
| 115116 | 1 | 0 | 0 | 0 | 0 |
| 115117 | 1 | 0 | 0 | 0 | 0 |
| 115118 | 1 | 0 | 0 | 0 | 0 |
| 118119 | 1 | 0 | 0 | 0 | 0 |
| 118120 | 1 | 0 | 0 | 0 | 0 |
| 118121 | 1 | 0 | 0 | 0 | 0 |
| 121122 | 1 | 0 | 0 | 0 | 0 |
| 121123 | 1 | 0 | 0 | 0 | 0 |
| 121124 | 1 | 0 | 0 | 0 | 0 |
| 124125 | 1 | 0 | 0 | 0 | 0 |
| 124126 | 1 | 0 | 0 | 0 | 0 |
| 124127 | 1 | 0 | 0 | 0 | 0 |
| 127128 | 1 | 0 | 0 | 0 | 0 |
| 128129 | 1 | 0 | 0 | 0 | 0 |
| 128135 | 2 | 0 | 0 | 0 | 0 |
| 129130 | 1 | 0 | 0 | 0 | 0 |
| 129131 | 1 | 0 | 0 | 0 | 0 |
| 129132 | 1 | 0 | 0 | 0 | 0 |
| 132133 | 1 | 0 | 0 | 0 | 0 |
| 132134 | 1 | 0 | 0 | 0 | 0 |
| 132142 | 1 | 0 | 0 | 0 | 0 |
| 136137 | 1 | 0 | 0 | 0 | 0 |
| 136138 | 1 | 0 | 0 | 0 | 0 |
| 136139 | 1 | 0 | 0 | 0 | 0 |
| 136155 | 1 | 0 | 0 | 0 | 0 |
| 139140 | 1 | 0 | 0 | 0 | 0 |
| 139141 | 1 | 0 | 0 | 0 | 0 |
| 139142 | 1 | 0 | 0 | 0 | 0 |
| 142158 | 1 | 0 | 0 | 0 | 0 |
| 143144 | 1 | 0 | 0 | 0 | 0 |
| 143145 | 1 | 0 | 0 | 0 | 0 |
| 143154 | 1 | 0 | 0 | 0 | 0 |
| 143155 | 1 | 0 | 0 | 0 | 0 |
| 145146 | 1 | 0 | 0 | 0 | 0 |
| 146147 | 1 | 0 | 0 | 0 | 0 |
| 146148 | 1 | 0 | 0 | 0 | 0 |
| 146149 | 1 | 0 | 0 | 0 | 0 |
| 150151 | 1 | 0 | 0 | 0 | 0 |
| 150152 | 1 | 0 | 0 | 0 | 0 |
| 150153 | 1 | 0 | 0 | 0 | 0 |
| 150154 | 1 | 0 | 0 | 0 | 0 |
| 155156 | 1 | 0 | 0 | 0 | 0 |
| 155157 | 1 | 0 | 0 | 0 | 0 |
| 158159 | 1 | 0 | 0 | 0 | 0 |
| 158160 | 1 | 0 | 0 | 0 | 0 |
| 158161 | 1 | 0 | 0 | 0 | 0 |
| 161162 | 1 | 0 | 0 | 0 | 0 |
| 161163 | 1 | 0 | 0 | 0 | 0 |
| 161164 | 1 | 0 | 0 | 0 | 0 |
| 164165 | 1 | 0 | 0 | 0 | 0 |
| 164169 | 2 | 0 | 0 | 0 | 0 |
| 165166 | 1 | 0 | 0 | 0 | 0 |
| 166167 | 1 | 0 | 0 | 0 | 0 |
| 166168 | 1 | 0 | 0 | 0 | 0 |
| 166170 | 1 | 0 | 0 | 0 | 0 |
| 170171 | 1 | 0 | 0 | 0 | 0 |
| 170172 | 1 | 0 | 0 | 0 | 0 |
| 170173 | 1 | 0 | 0 | 0 | 0 |
| 173174 | 1 | 0 | 0 | 0 | 0 |
| 173175 | 1 | 0 | 0 | 0 | 0 |
| 173176 | 1 | 0 | 0 | 0 | 0 |
| 176177 | 1 | 0 | 0 | 0 | 0 |
| 176178 | 1 | 0 | 0 | 0 | 0 |
| 176179 | 1 | 0 | 0 | 0 | 0 |
| 179180 | 1 | 0 | 0 | 0 | 0 |
| 179181 | 1 | 0 | 0 | 0 | 0 |
| 179182 | 1 | 0 | 0 | 0 | 0 |
| 182183 | 1 | 0 | 0 | 0 | 0 |

|        |   |   |   |   |   |
|--------|---|---|---|---|---|
| 182184 | 1 | 0 | 0 | 0 | 0 |
| 182185 | 1 | 0 | 0 | 0 | 0 |
| 185186 | 1 | 0 | 0 | 0 | 0 |
| 185187 | 1 | 0 | 0 | 0 | 0 |
| 185188 | 1 | 0 | 0 | 0 | 0 |
| 188189 | 1 | 0 | 0 | 0 | 0 |
| 188190 | 1 | 0 | 0 | 0 | 0 |
| 188191 | 1 | 0 | 0 | 0 | 0 |
| 191192 | 1 | 0 | 0 | 0 | 0 |
| 191193 | 1 | 0 | 0 | 0 | 0 |
| 191194 | 1 | 0 | 0 | 0 | 0 |
| 194195 | 1 | 0 | 0 | 0 | 0 |
| 195196 | 1 | 0 | 0 | 0 | 0 |
| 195202 | 2 | 0 | 0 | 0 | 0 |
| 196197 | 1 | 0 | 0 | 0 | 0 |
| 196198 | 1 | 0 | 0 | 0 | 0 |
| 196199 | 1 | 0 | 0 | 0 | 0 |
| 199200 | 1 | 0 | 0 | 0 | 0 |
| 199201 | 1 | 0 | 0 | 0 | 0 |
| 199209 | 1 | 0 | 0 | 0 | 0 |
| 203204 | 1 | 0 | 0 | 0 | 0 |
| 203205 | 1 | 0 | 0 | 0 | 0 |
| 203206 | 1 | 0 | 0 | 0 | 0 |
| 203222 | 1 | 0 | 0 | 0 | 0 |
| 206207 | 1 | 0 | 0 | 0 | 0 |
| 206208 | 1 | 0 | 0 | 0 | 0 |
| 206209 | 1 | 0 | 0 | 0 | 0 |
| 209225 | 1 | 0 | 0 | 0 | 0 |
| 210211 | 1 | 0 | 0 | 0 | 0 |
| 210212 | 1 | 0 | 0 | 0 | 0 |
| 210221 | 1 | 0 | 0 | 0 | 0 |
| 210222 | 1 | 0 | 0 | 0 | 0 |
| 212213 | 1 | 0 | 0 | 0 | 0 |
| 213214 | 1 | 0 | 0 | 0 | 0 |
| 213215 | 1 | 0 | 0 | 0 | 0 |
| 213216 | 1 | 0 | 0 | 0 | 0 |
| 217218 | 1 | 0 | 0 | 0 | 0 |
| 217219 | 1 | 0 | 0 | 0 | 0 |
| 217220 | 1 | 0 | 0 | 0 | 0 |
| 217221 | 1 | 0 | 0 | 0 | 0 |
| 222223 | 1 | 0 | 0 | 0 | 0 |
| 222224 | 1 | 0 | 0 | 0 | 0 |
| 225226 | 1 | 0 | 0 | 0 | 0 |
| 225227 | 1 | 0 | 0 | 0 | 0 |
| 225228 | 1 | 0 | 0 | 0 | 0 |
| 228229 | 1 | 0 | 0 | 0 | 0 |
| 228230 | 1 | 0 | 0 | 0 | 0 |
| 228231 | 1 | 0 | 0 | 0 | 0 |
| 231232 | 1 | 0 | 0 | 0 | 0 |
| 231236 | 2 | 0 | 0 | 0 | 0 |
| 232233 | 1 | 0 | 0 | 0 | 0 |
| 233234 | 1 | 0 | 0 | 0 | 0 |
| 233235 | 1 | 0 | 0 | 0 | 0 |
| 233237 | 1 | 0 | 0 | 0 | 0 |
| 237238 | 1 | 0 | 0 | 0 | 0 |
| 237239 | 1 | 0 | 0 | 0 | 0 |
| 237240 | 1 | 0 | 0 | 0 | 0 |
| 240241 | 1 | 0 | 0 | 0 | 0 |
| 240242 | 1 | 0 | 0 | 0 | 0 |
| 240243 | 1 | 0 | 0 | 0 | 0 |
| 243244 | 1 | 0 | 0 | 0 | 0 |
| 243245 | 1 | 0 | 0 | 0 | 0 |
| 243246 | 1 | 0 | 0 | 0 | 0 |
| 246247 | 1 | 0 | 0 | 0 | 0 |
| 246248 | 1 | 0 | 0 | 0 | 0 |
| 246249 | 1 | 0 | 0 | 0 | 0 |
| 249250 | 1 | 0 | 0 | 0 | 0 |
| 249251 | 1 | 0 | 0 | 0 | 0 |
| 249252 | 1 | 0 | 0 | 0 | 0 |
| 252253 | 1 | 0 | 0 | 0 | 0 |
| 252254 | 1 | 0 | 0 | 0 | 0 |
| 252255 | 1 | 0 | 0 | 0 | 0 |
| 255256 | 1 | 0 | 0 | 0 | 0 |
| 255257 | 1 | 0 | 0 | 0 | 0 |
| 255258 | 1 | 0 | 0 | 0 | 0 |
| 258259 | 1 | 0 | 0 | 0 | 0 |
| 258260 | 1 | 0 | 0 | 0 | 0 |
| 258261 | 1 | 0 | 0 | 0 | 0 |
| 261262 | 1 | 0 | 0 | 0 | 0 |
| 262263 | 1 | 0 | 0 | 0 | 0 |
| 262269 | 2 | 0 | 0 | 0 | 0 |

|        |   |   |   |   |   |
|--------|---|---|---|---|---|
| 263264 | 1 | 0 | 0 | 0 | 0 |
| 263265 | 1 | 0 | 0 | 0 | 0 |
| 263266 | 1 | 0 | 0 | 0 | 0 |
| 266267 | 1 | 0 | 0 | 0 | 0 |
| 266268 | 1 | 0 | 0 | 0 | 0 |
| 266276 | 1 | 0 | 0 | 0 | 0 |
| 270271 | 1 | 0 | 0 | 0 | 0 |
| 270272 | 1 | 0 | 0 | 0 | 0 |
| 270273 | 1 | 0 | 0 | 0 | 0 |
| 270289 | 1 | 0 | 0 | 0 | 0 |
| 273274 | 1 | 0 | 0 | 0 | 0 |
| 273275 | 1 | 0 | 0 | 0 | 0 |
| 273276 | 1 | 0 | 0 | 0 | 0 |
| 276292 | 1 | 0 | 0 | 0 | 0 |
| 277278 | 1 | 0 | 0 | 0 | 0 |
| 277279 | 1 | 0 | 0 | 0 | 0 |
| 277288 | 1 | 0 | 0 | 0 | 0 |
| 277289 | 1 | 0 | 0 | 0 | 0 |
| 279280 | 1 | 0 | 0 | 0 | 0 |
| 280281 | 1 | 0 | 0 | 0 | 0 |
| 280282 | 1 | 0 | 0 | 0 | 0 |
| 280283 | 1 | 0 | 0 | 0 | 0 |
| 284285 | 1 | 0 | 0 | 0 | 0 |
| 284286 | 1 | 0 | 0 | 0 | 0 |
| 284287 | 1 | 0 | 0 | 0 | 0 |
| 284288 | 1 | 0 | 0 | 0 | 0 |
| 289290 | 1 | 0 | 0 | 0 | 0 |
| 289291 | 1 | 0 | 0 | 0 | 0 |
| 292293 | 1 | 0 | 0 | 0 | 0 |
| 292294 | 1 | 0 | 0 | 0 | 0 |
| 292295 | 1 | 0 | 0 | 0 | 0 |
| 295296 | 1 | 0 | 0 | 0 | 0 |
| 295297 | 1 | 0 | 0 | 0 | 0 |
| 295298 | 1 | 0 | 0 | 0 | 0 |
| 298299 | 1 | 0 | 0 | 0 | 0 |
| 298303 | 2 | 0 | 0 | 0 | 0 |
| 299300 | 1 | 0 | 0 | 0 | 0 |
| 300301 | 1 | 0 | 0 | 0 | 0 |
| 300302 | 1 | 0 | 0 | 0 | 0 |
| 300304 | 1 | 0 | 0 | 0 | 0 |
| 304305 | 1 | 0 | 0 | 0 | 0 |
| 304306 | 1 | 0 | 0 | 0 | 0 |
| 304307 | 1 | 0 | 0 | 0 | 0 |
| 307308 | 1 | 0 | 0 | 0 | 0 |
| 307309 | 1 | 0 | 0 | 0 | 0 |
| 307310 | 1 | 0 | 0 | 0 | 0 |
| 310311 | 1 | 0 | 0 | 0 | 0 |
| 310312 | 1 | 0 | 0 | 0 | 0 |
| 310313 | 1 | 0 | 0 | 0 | 0 |
| 313314 | 1 | 0 | 0 | 0 | 0 |
| 313315 | 1 | 0 | 0 | 0 | 0 |
| 313316 | 1 | 0 | 0 | 0 | 0 |
| 316317 | 1 | 0 | 0 | 0 | 0 |
| 316318 | 1 | 0 | 0 | 0 | 0 |
| 316319 | 1 | 0 | 0 | 0 | 0 |
| 319320 | 1 | 0 | 0 | 0 | 0 |
| 319321 | 1 | 0 | 0 | 0 | 0 |
| 319322 | 1 | 0 | 0 | 0 | 0 |
| 322323 | 1 | 0 | 0 | 0 | 0 |
| 322324 | 1 | 0 | 0 | 0 | 0 |
| 322325 | 1 | 0 | 0 | 0 | 0 |
| 325326 | 1 | 0 | 0 | 0 | 0 |
| 325327 | 1 | 0 | 0 | 0 | 0 |
| 325328 | 1 | 0 | 0 | 0 | 0 |
| 328329 | 1 | 0 | 0 | 0 | 0 |
| 329330 | 1 | 0 | 0 | 0 | 0 |
| 329336 | 2 | 0 | 0 | 0 | 0 |
| 330331 | 1 | 0 | 0 | 0 | 0 |
| 330332 | 1 | 0 | 0 | 0 | 0 |
| 330333 | 1 | 0 | 0 | 0 | 0 |
| 333334 | 1 | 0 | 0 | 0 | 0 |
| 333335 | 1 | 0 | 0 | 0 | 0 |
| 333343 | 1 | 0 | 0 | 0 | 0 |
| 337338 | 1 | 0 | 0 | 0 | 0 |
| 337339 | 1 | 0 | 0 | 0 | 0 |
| 337340 | 1 | 0 | 0 | 0 | 0 |
| 337357 | 1 | 0 | 0 | 0 | 0 |
| 340341 | 1 | 0 | 0 | 0 | 0 |
| 340342 | 1 | 0 | 0 | 0 | 0 |
| 340343 | 1 | 0 | 0 | 0 | 0 |
| 343344 | 1 | 0 | 0 | 0 | 0 |

345346 1 0 0 0 0  
345347 1 0 0 0 0  
345356 1 0 0 0 0  
345357 1 0 0 0 0  
347348 1 0 0 0 0  
348349 1 0 0 0 0  
348350 1 0 0 0 0  
348351 1 0 0 0 0  
352353 1 0 0 0 0  
352354 1 0 0 0 0  
352355 1 0 0 0 0  
352356 1 0 0 0 0  
357358 1 0 0 0 0  
357359 1 0 0 0 0

M END  
> <NAME>  
LL8\_12

\$\$\$\$  
M17\_12  
MOE2012 3D

393398 0 0 1 0 0 0 0 0999 V2000  
22.6440 -2.8200 -13.3190 C 0 0 0 0 0 0 0 0 0 0 0 0 0 0 0 0  
22.8910 -4.1410 -12.9080 C 0 0 0 0 0 0 0 0 0 0 0 0 0 0 0 0  
23.5730 -4.3550 -11.7010 C 0 0 0 0 0 0 0 0 0 0 0 0 0 0 0 0  
23.7820 -5.3600 -11.3480 H 0 0 0 0 0 0 0 0 0 0 0 0 0 0 0 0  
23.9920 -3.2770 -10.9030 C 0 0 0 0 0 0 0 0 0 0 0 0 0 0 0 0  
23.7150 -1.9710 -11.3190 C 0 0 0 0 0 0 0 0 0 0 0 0 0 0 0 0  
24.0180 -1.1220 -10.7100 H 0 0 0 0 0 0 0 0 0 0 0 0 0 0 0 0  
23.0370 -1.7460 -12.5140 C 0 0 0 0 0 0 0 0 0 0 0 0 0 0 0 0  
22.8190 -0.7280 -12.8280 H 0 0 0 0 0 0 0 0 0 0 0 0 0 0 0 0  
21.9700 -2.4590 -14.4590 O 0 0 0 0 0 0 0 0 0 0 0 0 0 0 0 0  
22.4090 -5.1440 -13.7070 O 0 0 0 0 0 0 0 0 0 0 0 0 0 0 0 0  
22.7200 -6.4860 -13.3530 C 0 0 0 0 0 0 0 0 0 0 0 0 0 0 0 0  
22.3030 -7.1390 -14.1260 H 0 0 0 0 0 0 0 0 0 0 0 0 0 0 0 0  
22.2560 -6.7590 -12.4010 H 0 0 0 0 0 0 0 0 0 0 0 0 0 0 0 0  
23.8030 -6.6490 -13.3300 H 0 0 0 0 0 0 0 0 0 0 0 0 0 0 0 0  
22.4290 -3.1110 -15.6420 C 0 0 0 0 0 0 0 0 0 0 0 0 0 0 0 0  
21.8280 -4.0040 -15.8390 H 0 0 0 0 0 0 0 0 0 0 0 0 0 0 0 0  
23.4960 -3.3570 -15.6050 H 0 0 0 0 0 0 0 0 0 0 0 0 0 0 0 0  
22.2770 -2.4220 -16.4790 H 0 0 0 0 0 0 0 0 0 0 0 0 0 0 0 0  
24.7010 -3.5250 -9.5910 C 0 0 0 0 0 0 0 0 0 0 0 0 0 0 0 0  
25.4460 -4.3170 -9.7450 H 0 0 0 0 0 0 0 0 0 0 0 0 0 0 0 0  
25.2760 -2.6360 -9.2980 H 0 0 0 0 0 0 0 0 0 0 0 0 0 0 0 0  
23.7560 -3.9410 -8.4530 C 0 0 0 0 0 0 0 0 0 0 0 0 0 0 0 0  
23.1570 -4.8070 -8.7620 H 0 0 0 0 0 0 0 0 0 0 0 0 0 0 0 0  
24.3700 -4.2480 -7.5980 H 0 0 0 0 0 0 0 0 0 0 0 0 0 0 0 0  
22.8810 -2.8370 -8.0430 N 0 0 0 3 0 0 0 0 0 0 0 0 0 0 0 0  
22.3440 -2.5210 -8.8530 H 0 0 0 0 0 0 0 0 0 0 0 0 0 0 0 0  
23.5240 10.7960 -2.8850 C 0 0 0 0 0 0 0 0 0 0 0 0 0 0 0 0  
22.9000 10.1150 -3.4730 H 0 0 0 0 0 0 0 0 0 0 0 0 0 0 0 0  
24.3370 11.1250 -3.5400 H 0 0 0 0 0 0 0 0 0 0 0 0 0 0 0 0  
22.6650 11.8980 -2.4990 O 0 0 0 0 0 0 0 0 0 0 0 0 0 0 0 0  
23.0230 13.2080 -2.4950 C 0 0 0 0 0 0 0 0 0 0 0 0 0 0 0 0  
24.4820 13.5220 -2.7370 C 0 0 0 0 0 0 0 0 0 0 0 0 0 0 0 0  
25.1210 12.7670 -2.2720 H 0 0 0 0 0 0 0 0 0 0 0 0 0 0 0 0  
24.6430 13.4920 -3.8210 H 0 0 0 0 0 0 0 0 0 0 0 0 0 0 0 0  
24.8930 14.9000 -2.2070 C 0 0 0 0 0 0 0 0 0 0 0 0 0 0 0 0  
24.1680 15.6680 -2.5090 H 0 0 0 0 0 0 0 0 0 0 0 0 0 0 0 0  
25.8230 15.1910 -2.7090 H 0 0 0 0 0 0 0 0 0 0 0 0 0 0 0 0  
22.1700 14.0790 -2.3450 O 0 0 0 0 0 0 0 0 0 0 0 0 0 0 0 0  
21.9590 -3.2620 -6.9850 C 0 0 0 0 0 0 0 0 0 0 0 0 0 0 0 0  
22.5110 -3.7260 -6.1600 H 0 0 0 0 0 0 0 0 0 0 0 0 0 0 0 0  
21.2670 -4.0120 -7.3860 H 0 0 0 0 0 0 0 0 0 0 0 0 0 0 0 0  
21.1530 -2.0720 -6.4740 C 0 0 0 0 0 0 0 0 0 0 0 0 0 0 0 0  
20.7210 -1.5140 -7.3130 H 0 0 0 0 0 0 0 0 0 0 0 0 0 0 0 0  
20.3210 -2.4190 -5.8500 H 0 0 0 0 0 0 0 0 0 0 0 0 0 0 0 0  
22.0000 -1.1610 -5.6220 C 0 0 0 0 0 0 0 0 0 0 0 0 0 0 0 0  
21.7110 0.1440 -5.8950 O 0 0 0 0 0 0 0 0 0 0 0 0 0 0 0 0  
22.4400 1.1230 -5.1320 C 0 0 0 0 0 0 0 0 0 0 0 0 0 0 0 0  
21.8250 2.0280 -5.1040 H 0 0 0 0 0 0 0 0 0 0 0 0 0 0 0 0  
22.5640 0.7890 -4.0940 H 0 0 0 0 0 0 0 0 0 0 0 0 0 0 0 0  
22.7960 -1.5420 -4.7740 O 0 0 0 0 0 0 0 0 0 0 0 0 0 0 0 0  
23.7810 1.4120 -5.8010 C 0 0 0 0 0 0 0 0 0 0 0 0 0 0 0 0  
24.3060 0.4750 -6.0210 H 0 0 0 0 0 0 0 0 0 0 0 0 0 0 0 0  
23.5880 1.8910 -6.7690 H 0 0 0 0 0 0 0 0 0 0 0 0 0 0 0 0  
24.6740 2.3020 -4.9480 C 0 0 0 0 0 0 0 0 0 0 0 0 0 0 0 0  
24.8780 1.8180 -3.9850 H 0 0 0 0 0 0 0 0 0 0 0 0 0 0 0 0  
25.6260 2.4640 -5.4670 H 0 0 0 0 0 0 0 0 0 0 0 0 0 0 0 0  
24.0370 3.5600 -4.7270 O 0 0 0 0 0 0 0 0 0 0 0 0 0 0 0 0











|         |          |         |   |   |   |   |   |   |   |   |   |   |   |   |   |
|---------|----------|---------|---|---|---|---|---|---|---|---|---|---|---|---|---|
| 38.0300 | -19.1660 | 17.8710 | H | 0 | 0 | 0 | 0 | 0 | 0 | 0 | 0 | 0 | 0 | 0 | 0 |
| 39.4070 | -20.2600 | 17.4500 | H | 0 | 0 | 0 | 0 | 0 | 0 | 0 | 0 | 0 | 0 | 0 | 0 |
| 39.1280 | -19.7600 | 19.1210 | H | 0 | 0 | 0 | 0 | 0 | 0 | 0 | 0 | 0 | 0 | 0 | 0 |
| 34.3910 | -23.1710 | 14.3400 | C | 0 | 0 | 0 | 0 | 0 | 0 | 0 | 0 | 0 | 0 | 0 | 0 |
| 33.4980 | -23.6110 | 14.8030 | H | 0 | 0 | 0 | 0 | 0 | 0 | 0 | 0 | 0 | 0 | 0 | 0 |
| 34.0330 | -22.3350 | 13.7250 | H | 0 | 0 | 0 | 0 | 0 | 0 | 0 | 0 | 0 | 0 | 0 | 0 |
| 35.1030 | -24.2110 | 13.4660 | C | 0 | 0 | 0 | 0 | 0 | 0 | 0 | 0 | 0 | 0 | 0 | 0 |
| 35.9950 | -23.7530 | 13.0250 | H | 0 | 0 | 0 | 0 | 0 | 0 | 0 | 0 | 0 | 0 | 0 | 0 |
| 35.4360 | -25.0510 | 14.0880 | H | 0 | 0 | 0 | 0 | 0 | 0 | 0 | 0 | 0 | 0 | 0 | 0 |
| 34.1970 | -24.6900 | 12.4160 | N | 0 | 0 | 3 | 0 | 0 | 0 | 0 | 0 | 0 | 0 | 0 | 0 |
| 33.3820 | -25.1190 | 12.8560 | H | 0 | 0 | 0 | 0 | 0 | 0 | 0 | 0 | 0 | 0 | 0 | 0 |
| 1       | 2        | 1       | 0 | 0 | 0 | 0 | 0 | 0 | 0 | 0 | 0 | 0 | 0 | 0 | 0 |
| 1       | 8        | 2       | 0 | 0 | 0 | 0 | 0 | 0 | 0 | 0 | 0 | 0 | 0 | 0 | 0 |
| 1       | 10       | 1       | 0 | 0 | 0 | 0 | 0 | 0 | 0 | 0 | 0 | 0 | 0 | 0 | 0 |
| 2       | 3        | 2       | 0 | 0 | 0 | 0 | 0 | 0 | 0 | 0 | 0 | 0 | 0 | 0 | 0 |
| 2       | 11       | 1       | 0 | 0 | 0 | 0 | 0 | 0 | 0 | 0 | 0 | 0 | 0 | 0 | 0 |
| 3       | 4        | 1       | 0 | 0 | 0 | 0 | 0 | 0 | 0 | 0 | 0 | 0 | 0 | 0 | 0 |
| 3       | 5        | 1       | 0 | 0 | 0 | 0 | 0 | 0 | 0 | 0 | 0 | 0 | 0 | 0 | 0 |
| 5       | 6        | 2       | 0 | 0 | 0 | 0 | 0 | 0 | 0 | 0 | 0 | 0 | 0 | 0 | 0 |
| 5       | 20       | 1       | 0 | 0 | 0 | 0 | 0 | 0 | 0 | 0 | 0 | 0 | 0 | 0 | 0 |
| 6       | 7        | 1       | 0 | 0 | 0 | 0 | 0 | 0 | 0 | 0 | 0 | 0 | 0 | 0 | 0 |
| 6       | 8        | 1       | 0 | 0 | 0 | 0 | 0 | 0 | 0 | 0 | 0 | 0 | 0 | 0 | 0 |
| 8       | 9        | 1       | 0 | 0 | 0 | 0 | 0 | 0 | 0 | 0 | 0 | 0 | 0 | 0 | 0 |
| 10      | 16       | 1       | 0 | 0 | 0 | 0 | 0 | 0 | 0 | 0 | 0 | 0 | 0 | 0 | 0 |
| 11      | 12       | 1       | 0 | 0 | 0 | 0 | 0 | 0 | 0 | 0 | 0 | 0 | 0 | 0 | 0 |
| 12      | 13       | 1       | 0 | 0 | 0 | 0 | 0 | 0 | 0 | 0 | 0 | 0 | 0 | 0 | 0 |
| 12      | 14       | 1       | 0 | 0 | 0 | 0 | 0 | 0 | 0 | 0 | 0 | 0 | 0 | 0 | 0 |
| 12      | 15       | 1       | 0 | 0 | 0 | 0 | 0 | 0 | 0 | 0 | 0 | 0 | 0 | 0 | 0 |
| 16      | 17       | 1       | 0 | 0 | 0 | 0 | 0 | 0 | 0 | 0 | 0 | 0 | 0 | 0 | 0 |
| 16      | 18       | 1       | 0 | 0 | 0 | 0 | 0 | 0 | 0 | 0 | 0 | 0 | 0 | 0 | 0 |
| 16      | 19       | 1       | 0 | 0 | 0 | 0 | 0 | 0 | 0 | 0 | 0 | 0 | 0 | 0 | 0 |
| 20      | 21       | 1       | 0 | 0 | 0 | 0 | 0 | 0 | 0 | 0 | 0 | 0 | 0 | 0 | 0 |
| 20      | 22       | 1       | 0 | 0 | 0 | 0 | 0 | 0 | 0 | 0 | 0 | 0 | 0 | 0 | 0 |
| 20      | 23       | 1       | 0 | 0 | 0 | 0 | 0 | 0 | 0 | 0 | 0 | 0 | 0 | 0 | 0 |
| 23      | 24       | 1       | 0 | 0 | 0 | 0 | 0 | 0 | 0 | 0 | 0 | 0 | 0 | 0 | 0 |
| 23      | 25       | 1       | 0 | 0 | 0 | 0 | 0 | 0 | 0 | 0 | 0 | 0 | 0 | 0 | 0 |
| 23      | 26       | 1       | 0 | 0 | 0 | 0 | 0 | 0 | 0 | 0 | 0 | 0 | 0 | 0 | 0 |
| 26      | 27       | 1       | 0 | 0 | 0 | 0 | 0 | 0 | 0 | 0 | 0 | 0 | 0 | 0 | 0 |
| 26      | 40       | 1       | 0 | 0 | 0 | 0 | 0 | 0 | 0 | 0 | 0 | 0 | 0 | 0 | 0 |
| 28      | 29       | 1       | 0 | 0 | 0 | 0 | 0 | 0 | 0 | 0 | 0 | 0 | 0 | 0 | 0 |
| 28      | 30       | 1       | 0 | 0 | 0 | 0 | 0 | 0 | 0 | 0 | 0 | 0 | 0 | 0 | 0 |
| 28      | 31       | 1       | 0 | 0 | 0 | 0 | 0 | 0 | 0 | 0 | 0 | 0 | 0 | 0 | 0 |
| 28      | 72       | 1       | 0 | 0 | 0 | 0 | 0 | 0 | 0 | 0 | 0 | 0 | 0 | 0 | 0 |
| 31      | 32       | 1       | 0 | 0 | 0 | 0 | 0 | 0 | 0 | 0 | 0 | 0 | 0 | 0 | 0 |
| 32      | 33       | 1       | 0 | 0 | 0 | 0 | 0 | 0 | 0 | 0 | 0 | 0 | 0 | 0 | 0 |
| 32      | 39       | 2       | 0 | 0 | 0 | 0 | 0 | 0 | 0 | 0 | 0 | 0 | 0 | 0 | 0 |
| 33      | 34       | 1       | 0 | 0 | 0 | 0 | 0 | 0 | 0 | 0 | 0 | 0 | 0 | 0 | 0 |
| 33      | 35       | 1       | 0 | 0 | 0 | 0 | 0 | 0 | 0 | 0 | 0 | 0 | 0 | 0 | 0 |
| 33      | 36       | 1       | 0 | 0 | 0 | 0 | 0 | 0 | 0 | 0 | 0 | 0 | 0 | 0 | 0 |
| 36      | 37       | 1       | 0 | 0 | 0 | 0 | 0 | 0 | 0 | 0 | 0 | 0 | 0 | 0 | 0 |
| 36      | 38       | 1       | 0 | 0 | 0 | 0 | 0 | 0 | 0 | 0 | 0 | 0 | 0 | 0 | 0 |
| 36      | 100      | 1       | 0 | 0 | 0 | 0 | 0 | 0 | 0 | 0 | 0 | 0 | 0 | 0 | 0 |
| 40      | 41       | 1       | 0 | 0 | 0 | 0 | 0 | 0 | 0 | 0 | 0 | 0 | 0 | 0 | 0 |
| 40      | 42       | 1       | 0 | 0 | 0 | 0 | 0 | 0 | 0 | 0 | 0 | 0 | 0 | 0 | 0 |
| 40      | 43       | 1       | 0 | 0 | 0 | 0 | 0 | 0 | 0 | 0 | 0 | 0 | 0 | 0 | 0 |
| 43      | 44       | 1       | 0 | 0 | 0 | 0 | 0 | 0 | 0 | 0 | 0 | 0 | 0 | 0 | 0 |
| 43      | 45       | 1       | 0 | 0 | 0 | 0 | 0 | 0 | 0 | 0 | 0 | 0 | 0 | 0 | 0 |
| 43      | 46       | 1       | 0 | 0 | 0 | 0 | 0 | 0 | 0 | 0 | 0 | 0 | 0 | 0 | 0 |
| 46      | 47       | 1       | 0 | 0 | 0 | 0 | 0 | 0 | 0 | 0 | 0 | 0 | 0 | 0 | 0 |
| 46      | 51       | 2       | 0 | 0 | 0 | 0 | 0 | 0 | 0 | 0 | 0 | 0 | 0 | 0 | 0 |
| 47      | 48       | 1       | 0 | 0 | 0 | 0 | 0 | 0 | 0 | 0 | 0 | 0 | 0 | 0 | 0 |
| 48      | 49       | 1       | 0 | 0 | 0 | 0 | 0 | 0 | 0 | 0 | 0 | 0 | 0 | 0 | 0 |
| 48      | 50       | 1       | 0 | 0 | 0 | 0 | 0 | 0 | 0 | 0 | 0 | 0 | 0 | 0 | 0 |
| 48      | 52       | 1       | 0 | 0 | 0 | 0 | 0 | 0 | 0 | 0 | 0 | 0 | 0 | 0 | 0 |
| 52      | 53       | 1       | 0 | 0 | 0 | 0 | 0 | 0 | 0 | 0 | 0 | 0 | 0 | 0 | 0 |
| 52      | 54       | 1       | 0 | 0 | 0 | 0 | 0 | 0 | 0 | 0 | 0 | 0 | 0 | 0 | 0 |
| 52      | 55       | 1       | 0 | 0 | 0 | 0 | 0 | 0 | 0 | 0 | 0 | 0 | 0 | 0 | 0 |
| 55      | 56       | 1       | 0 | 0 | 0 | 0 | 0 | 0 | 0 | 0 | 0 | 0 | 0 | 0 | 0 |
| 55      | 57       | 1       | 0 | 0 | 0 | 0 | 0 | 0 | 0 | 0 | 0 | 0 | 0 | 0 | 0 |
| 55      | 58       | 1       | 0 | 0 | 0 | 0 | 0 | 0 | 0 | 0 | 0 | 0 | 0 | 0 | 0 |
| 58      | 59       | 1       | 0 | 0 | 0 | 0 | 0 | 0 | 0 | 0 | 0 | 0 | 0 | 0 | 0 |
| 59      | 60       | 1       | 0 | 0 | 0 | 0 | 0 | 0 | 0 | 0 | 0 | 0 | 0 | 0 | 0 |
| 59      | 61       | 1       | 0 | 0 | 0 | 0 | 0 | 0 | 0 | 0 | 0 | 0 | 0 | 0 | 0 |
| 59      | 62       | 1       | 0 | 0 | 0 | 0 | 0 | 0 | 0 | 0 | 0 | 0 | 0 | 0 | 0 |
| 62      | 63       | 1       | 0 | 0 | 0 | 0 | 0 | 0 | 0 | 0 | 0 | 0 | 0 | 0 | 0 |
| 62      | 64       | 1       | 0 | 0 | 0 | 0 | 0 | 0 | 0 | 0 | 0 | 0 | 0 | 0 | 0 |
| 62      | 65       | 1       | 0 | 0 | 0 | 0 | 0 | 0 | 0 | 0 | 0 | 0 | 0 | 0 | 0 |
| 65      | 66       | 1       | 0 | 0 | 0 | 0 | 0 | 0 | 0 | 0 | 0 | 0 | 0 | 0 | 0 |
| 65      | 67       | 1       | 0 | 0 | 0 | 0 | 0 | 0 | 0 | 0 | 0 | 0 | 0 | 0 | 0 |
| 65      | 68       | 1       | 0 | 0 | 0 | 0 | 0 | 0 | 0 | 0 | 0 | 0 | 0 | 0 | 0 |
| 68      | 69       | 1       | 0 | 0 | 0 | 0 | 0 | 0 | 0 | 0 | 0 | 0 | 0 | 0 | 0 |

|     |     |   |   |   |   |   |
|-----|-----|---|---|---|---|---|
| 69  | 70  | 1 | 0 | 0 | 0 | 0 |
| 69  | 71  | 1 | 0 | 0 | 0 | 0 |
| 69  | 72  | 1 | 0 | 0 | 0 | 0 |
| 72  | 73  | 1 | 0 | 0 | 0 | 0 |
| 72  | 74  | 1 | 0 | 0 | 0 | 0 |
| 75  | 76  | 1 | 0 | 0 | 0 | 0 |
| 75  | 82  | 2 | 0 | 0 | 0 | 0 |
| 75  | 84  | 1 | 0 | 0 | 0 | 0 |
| 76  | 77  | 2 | 0 | 0 | 0 | 0 |
| 76  | 85  | 1 | 0 | 0 | 0 | 0 |
| 77  | 78  | 1 | 0 | 0 | 0 | 0 |
| 77  | 79  | 1 | 0 | 0 | 0 | 0 |
| 79  | 80  | 2 | 0 | 0 | 0 | 0 |
| 79  | 94  | 1 | 0 | 0 | 0 | 0 |
| 80  | 81  | 1 | 0 | 0 | 0 | 0 |
| 80  | 82  | 1 | 0 | 0 | 0 | 0 |
| 82  | 83  | 1 | 0 | 0 | 0 | 0 |
| 84  | 90  | 1 | 0 | 0 | 0 | 0 |
| 85  | 86  | 1 | 0 | 0 | 0 | 0 |
| 86  | 87  | 1 | 0 | 0 | 0 | 0 |
| 86  | 88  | 1 | 0 | 0 | 0 | 0 |
| 86  | 89  | 1 | 0 | 0 | 0 | 0 |
| 90  | 91  | 1 | 0 | 0 | 0 | 0 |
| 90  | 92  | 1 | 0 | 0 | 0 | 0 |
| 90  | 93  | 1 | 0 | 0 | 0 | 0 |
| 94  | 95  | 1 | 0 | 0 | 0 | 0 |
| 94  | 96  | 1 | 0 | 0 | 0 | 0 |
| 94  | 97  | 1 | 0 | 0 | 0 | 0 |
| 97  | 98  | 1 | 0 | 0 | 0 | 0 |
| 97  | 99  | 1 | 0 | 0 | 0 | 0 |
| 97  | 100 | 1 | 0 | 0 | 0 | 0 |
| 100 | 113 | 1 | 0 | 0 | 0 | 0 |
| 101 | 102 | 1 | 0 | 0 | 0 | 0 |
| 101 | 103 | 1 | 0 | 0 | 0 | 0 |
| 101 | 104 | 1 | 0 | 0 | 0 | 0 |
| 101 | 145 | 1 | 0 | 0 | 0 | 0 |
| 104 | 105 | 1 | 0 | 0 | 0 | 0 |
| 105 | 106 | 1 | 0 | 0 | 0 | 0 |
| 105 | 112 | 2 | 0 | 0 | 0 | 0 |
| 106 | 107 | 1 | 0 | 0 | 0 | 0 |
| 106 | 108 | 1 | 0 | 0 | 0 | 0 |
| 106 | 109 | 1 | 0 | 0 | 0 | 0 |
| 109 | 110 | 1 | 0 | 0 | 0 | 0 |
| 109 | 111 | 1 | 0 | 0 | 0 | 0 |
| 109 | 173 | 1 | 0 | 0 | 0 | 0 |
| 113 | 114 | 1 | 0 | 0 | 0 | 0 |
| 113 | 115 | 1 | 0 | 0 | 0 | 0 |
| 113 | 116 | 1 | 0 | 0 | 0 | 0 |
| 116 | 117 | 1 | 0 | 0 | 0 | 0 |
| 116 | 118 | 1 | 0 | 0 | 0 | 0 |
| 116 | 119 | 1 | 0 | 0 | 0 | 0 |
| 119 | 120 | 1 | 0 | 0 | 0 | 0 |
| 119 | 124 | 2 | 0 | 0 | 0 | 0 |
| 120 | 121 | 1 | 0 | 0 | 0 | 0 |
| 121 | 122 | 1 | 0 | 0 | 0 | 0 |
| 121 | 123 | 1 | 0 | 0 | 0 | 0 |
| 121 | 125 | 1 | 0 | 0 | 0 | 0 |
| 125 | 126 | 1 | 0 | 0 | 0 | 0 |
| 125 | 127 | 1 | 0 | 0 | 0 | 0 |
| 125 | 128 | 1 | 0 | 0 | 0 | 0 |
| 128 | 129 | 1 | 0 | 0 | 0 | 0 |
| 128 | 130 | 1 | 0 | 0 | 0 | 0 |
| 128 | 131 | 1 | 0 | 0 | 0 | 0 |
| 131 | 132 | 1 | 0 | 0 | 0 | 0 |
| 132 | 133 | 1 | 0 | 0 | 0 | 0 |
| 132 | 134 | 1 | 0 | 0 | 0 | 0 |
| 132 | 135 | 1 | 0 | 0 | 0 | 0 |
| 135 | 136 | 1 | 0 | 0 | 0 | 0 |
| 135 | 137 | 1 | 0 | 0 | 0 | 0 |
| 135 | 138 | 1 | 0 | 0 | 0 | 0 |
| 138 | 139 | 1 | 0 | 0 | 0 | 0 |
| 138 | 140 | 1 | 0 | 0 | 0 | 0 |
| 138 | 141 | 1 | 0 | 0 | 0 | 0 |
| 141 | 142 | 1 | 0 | 0 | 0 | 0 |
| 142 | 143 | 1 | 0 | 0 | 0 | 0 |
| 142 | 144 | 1 | 0 | 0 | 0 | 0 |
| 142 | 145 | 1 | 0 | 0 | 0 | 0 |
| 145 | 146 | 1 | 0 | 0 | 0 | 0 |
| 145 | 147 | 1 | 0 | 0 | 0 | 0 |
| 148 | 149 | 1 | 0 | 0 | 0 | 0 |
| 148 | 155 | 2 | 0 | 0 | 0 | 0 |

|        |   |   |   |   |   |
|--------|---|---|---|---|---|
| 148157 | 1 | 0 | 0 | 0 | 0 |
| 149150 | 2 | 0 | 0 | 0 | 0 |
| 149158 | 1 | 0 | 0 | 0 | 0 |
| 150151 | 1 | 0 | 0 | 0 | 0 |
| 150152 | 1 | 0 | 0 | 0 | 0 |
| 152153 | 2 | 0 | 0 | 0 | 0 |
| 152167 | 1 | 0 | 0 | 0 | 0 |
| 153154 | 1 | 0 | 0 | 0 | 0 |
| 153155 | 1 | 0 | 0 | 0 | 0 |
| 155156 | 1 | 0 | 0 | 0 | 0 |
| 157163 | 1 | 0 | 0 | 0 | 0 |
| 158159 | 1 | 0 | 0 | 0 | 0 |
| 159160 | 1 | 0 | 0 | 0 | 0 |
| 159161 | 1 | 0 | 0 | 0 | 0 |
| 159162 | 1 | 0 | 0 | 0 | 0 |
| 163164 | 1 | 0 | 0 | 0 | 0 |
| 163165 | 1 | 0 | 0 | 0 | 0 |
| 163166 | 1 | 0 | 0 | 0 | 0 |
| 167168 | 1 | 0 | 0 | 0 | 0 |
| 167169 | 1 | 0 | 0 | 0 | 0 |
| 167170 | 1 | 0 | 0 | 0 | 0 |
| 170171 | 1 | 0 | 0 | 0 | 0 |
| 170172 | 1 | 0 | 0 | 0 | 0 |
| 170173 | 1 | 0 | 0 | 0 | 0 |
| 173186 | 1 | 0 | 0 | 0 | 0 |
| 174175 | 1 | 0 | 0 | 0 | 0 |
| 174176 | 1 | 0 | 0 | 0 | 0 |
| 174177 | 1 | 0 | 0 | 0 | 0 |
| 174218 | 1 | 0 | 0 | 0 | 0 |
| 177178 | 1 | 0 | 0 | 0 | 0 |
| 178179 | 1 | 0 | 0 | 0 | 0 |
| 178185 | 2 | 0 | 0 | 0 | 0 |
| 179180 | 1 | 0 | 0 | 0 | 0 |
| 179181 | 1 | 0 | 0 | 0 | 0 |
| 179182 | 1 | 0 | 0 | 0 | 0 |
| 182183 | 1 | 0 | 0 | 0 | 0 |
| 182184 | 1 | 0 | 0 | 0 | 0 |
| 182246 | 1 | 0 | 0 | 0 | 0 |
| 186187 | 1 | 0 | 0 | 0 | 0 |
| 186188 | 1 | 0 | 0 | 0 | 0 |
| 186189 | 1 | 0 | 0 | 0 | 0 |
| 189190 | 1 | 0 | 0 | 0 | 0 |
| 189191 | 1 | 0 | 0 | 0 | 0 |
| 189192 | 1 | 0 | 0 | 0 | 0 |
| 192193 | 1 | 0 | 0 | 0 | 0 |
| 192197 | 2 | 0 | 0 | 0 | 0 |
| 193194 | 1 | 0 | 0 | 0 | 0 |
| 194195 | 1 | 0 | 0 | 0 | 0 |
| 194196 | 1 | 0 | 0 | 0 | 0 |
| 194198 | 1 | 0 | 0 | 0 | 0 |
| 198199 | 1 | 0 | 0 | 0 | 0 |
| 198200 | 1 | 0 | 0 | 0 | 0 |
| 198201 | 1 | 0 | 0 | 0 | 0 |
| 201202 | 1 | 0 | 0 | 0 | 0 |
| 201203 | 1 | 0 | 0 | 0 | 0 |
| 201204 | 1 | 0 | 0 | 0 | 0 |
| 204205 | 1 | 0 | 0 | 0 | 0 |
| 205206 | 1 | 0 | 0 | 0 | 0 |
| 205207 | 1 | 0 | 0 | 0 | 0 |
| 205208 | 1 | 0 | 0 | 0 | 0 |
| 208209 | 1 | 0 | 0 | 0 | 0 |
| 208210 | 1 | 0 | 0 | 0 | 0 |
| 208211 | 1 | 0 | 0 | 0 | 0 |
| 211212 | 1 | 0 | 0 | 0 | 0 |
| 211213 | 1 | 0 | 0 | 0 | 0 |
| 211214 | 1 | 0 | 0 | 0 | 0 |
| 214215 | 1 | 0 | 0 | 0 | 0 |
| 215216 | 1 | 0 | 0 | 0 | 0 |
| 215217 | 1 | 0 | 0 | 0 | 0 |
| 215218 | 1 | 0 | 0 | 0 | 0 |
| 218219 | 1 | 0 | 0 | 0 | 0 |
| 218220 | 1 | 0 | 0 | 0 | 0 |
| 221222 | 1 | 0 | 0 | 0 | 0 |
| 221228 | 2 | 0 | 0 | 0 | 0 |
| 221230 | 1 | 0 | 0 | 0 | 0 |
| 222223 | 2 | 0 | 0 | 0 | 0 |
| 222231 | 1 | 0 | 0 | 0 | 0 |
| 223224 | 1 | 0 | 0 | 0 | 0 |
| 223225 | 1 | 0 | 0 | 0 | 0 |
| 225226 | 2 | 0 | 0 | 0 | 0 |
| 225240 | 1 | 0 | 0 | 0 | 0 |

|        |   |   |   |   |   |
|--------|---|---|---|---|---|
| 226227 | 1 | 0 | 0 | 0 | 0 |
| 226228 | 1 | 0 | 0 | 0 | 0 |
| 228229 | 1 | 0 | 0 | 0 | 0 |
| 230236 | 1 | 0 | 0 | 0 | 0 |
| 231232 | 1 | 0 | 0 | 0 | 0 |
| 232233 | 1 | 0 | 0 | 0 | 0 |
| 232234 | 1 | 0 | 0 | 0 | 0 |
| 232235 | 1 | 0 | 0 | 0 | 0 |
| 236237 | 1 | 0 | 0 | 0 | 0 |
| 236238 | 1 | 0 | 0 | 0 | 0 |
| 236239 | 1 | 0 | 0 | 0 | 0 |
| 240241 | 1 | 0 | 0 | 0 | 0 |
| 240242 | 1 | 0 | 0 | 0 | 0 |
| 240243 | 1 | 0 | 0 | 0 | 0 |
| 243244 | 1 | 0 | 0 | 0 | 0 |
| 243245 | 1 | 0 | 0 | 0 | 0 |
| 243246 | 1 | 0 | 0 | 0 | 0 |
| 246259 | 1 | 0 | 0 | 0 | 0 |
| 247248 | 1 | 0 | 0 | 0 | 0 |
| 247249 | 1 | 0 | 0 | 0 | 0 |
| 247250 | 1 | 0 | 0 | 0 | 0 |
| 247291 | 1 | 0 | 0 | 0 | 0 |
| 250251 | 1 | 0 | 0 | 0 | 0 |
| 251252 | 1 | 0 | 0 | 0 | 0 |
| 251258 | 2 | 0 | 0 | 0 | 0 |
| 252253 | 1 | 0 | 0 | 0 | 0 |
| 252254 | 1 | 0 | 0 | 0 | 0 |
| 252255 | 1 | 0 | 0 | 0 | 0 |
| 255256 | 1 | 0 | 0 | 0 | 0 |
| 255257 | 1 | 0 | 0 | 0 | 0 |
| 255319 | 1 | 0 | 0 | 0 | 0 |
| 259260 | 1 | 0 | 0 | 0 | 0 |
| 259261 | 1 | 0 | 0 | 0 | 0 |
| 259262 | 1 | 0 | 0 | 0 | 0 |
| 262263 | 1 | 0 | 0 | 0 | 0 |
| 262264 | 1 | 0 | 0 | 0 | 0 |
| 262265 | 1 | 0 | 0 | 0 | 0 |
| 265266 | 1 | 0 | 0 | 0 | 0 |
| 265270 | 2 | 0 | 0 | 0 | 0 |
| 266267 | 1 | 0 | 0 | 0 | 0 |
| 267268 | 1 | 0 | 0 | 0 | 0 |
| 267269 | 1 | 0 | 0 | 0 | 0 |
| 267271 | 1 | 0 | 0 | 0 | 0 |
| 271272 | 1 | 0 | 0 | 0 | 0 |
| 271273 | 1 | 0 | 0 | 0 | 0 |
| 271274 | 1 | 0 | 0 | 0 | 0 |
| 274275 | 1 | 0 | 0 | 0 | 0 |
| 274276 | 1 | 0 | 0 | 0 | 0 |
| 274277 | 1 | 0 | 0 | 0 | 0 |
| 277278 | 1 | 0 | 0 | 0 | 0 |
| 278279 | 1 | 0 | 0 | 0 | 0 |
| 278280 | 1 | 0 | 0 | 0 | 0 |
| 278281 | 1 | 0 | 0 | 0 | 0 |
| 281282 | 1 | 0 | 0 | 0 | 0 |
| 281283 | 1 | 0 | 0 | 0 | 0 |
| 281284 | 1 | 0 | 0 | 0 | 0 |
| 284285 | 1 | 0 | 0 | 0 | 0 |
| 284286 | 1 | 0 | 0 | 0 | 0 |
| 284287 | 1 | 0 | 0 | 0 | 0 |
| 287288 | 1 | 0 | 0 | 0 | 0 |
| 288289 | 1 | 0 | 0 | 0 | 0 |
| 288290 | 1 | 0 | 0 | 0 | 0 |
| 288291 | 1 | 0 | 0 | 0 | 0 |
| 291292 | 1 | 0 | 0 | 0 | 0 |
| 291293 | 1 | 0 | 0 | 0 | 0 |
| 294295 | 1 | 0 | 0 | 0 | 0 |
| 294301 | 2 | 0 | 0 | 0 | 0 |
| 294303 | 1 | 0 | 0 | 0 | 0 |
| 295296 | 2 | 0 | 0 | 0 | 0 |
| 295304 | 1 | 0 | 0 | 0 | 0 |
| 296297 | 1 | 0 | 0 | 0 | 0 |
| 296298 | 1 | 0 | 0 | 0 | 0 |
| 298299 | 2 | 0 | 0 | 0 | 0 |
| 298313 | 1 | 0 | 0 | 0 | 0 |
| 299300 | 1 | 0 | 0 | 0 | 0 |
| 299301 | 1 | 0 | 0 | 0 | 0 |
| 301302 | 1 | 0 | 0 | 0 | 0 |
| 303309 | 1 | 0 | 0 | 0 | 0 |
| 304305 | 1 | 0 | 0 | 0 | 0 |
| 305306 | 1 | 0 | 0 | 0 | 0 |
| 305307 | 1 | 0 | 0 | 0 | 0 |

|        |   |   |   |   |   |
|--------|---|---|---|---|---|
| 305308 | 1 | 0 | 0 | 0 | 0 |
| 309310 | 1 | 0 | 0 | 0 | 0 |
| 309311 | 1 | 0 | 0 | 0 | 0 |
| 309312 | 1 | 0 | 0 | 0 | 0 |
| 313314 | 1 | 0 | 0 | 0 | 0 |
| 313315 | 1 | 0 | 0 | 0 | 0 |
| 313316 | 1 | 0 | 0 | 0 | 0 |
| 316317 | 1 | 0 | 0 | 0 | 0 |
| 316318 | 1 | 0 | 0 | 0 | 0 |
| 316319 | 1 | 0 | 0 | 0 | 0 |
| 319332 | 1 | 0 | 0 | 0 | 0 |
| 320321 | 1 | 0 | 0 | 0 | 0 |
| 320322 | 1 | 0 | 0 | 0 | 0 |
| 320323 | 1 | 0 | 0 | 0 | 0 |
| 320364 | 1 | 0 | 0 | 0 | 0 |
| 323324 | 1 | 0 | 0 | 0 | 0 |
| 324325 | 1 | 0 | 0 | 0 | 0 |
| 324326 | 1 | 0 | 0 | 0 | 0 |
| 326327 | 1 | 0 | 0 | 0 | 0 |
| 326328 | 1 | 0 | 0 | 0 | 0 |
| 326329 | 1 | 0 | 0 | 0 | 0 |
| 329330 | 1 | 0 | 0 | 0 | 0 |
| 329331 | 1 | 0 | 0 | 0 | 0 |
| 329392 | 1 | 0 | 0 | 0 | 0 |
| 332333 | 1 | 0 | 0 | 0 | 0 |
| 332334 | 1 | 0 | 0 | 0 | 0 |
| 332335 | 1 | 0 | 0 | 0 | 0 |
| 335336 | 1 | 0 | 0 | 0 | 0 |
| 335337 | 1 | 0 | 0 | 0 | 0 |
| 335338 | 1 | 0 | 0 | 0 | 0 |
| 338339 | 1 | 0 | 0 | 0 | 0 |
| 338343 | 2 | 0 | 0 | 0 | 0 |
| 339340 | 1 | 0 | 0 | 0 | 0 |
| 340341 | 1 | 0 | 0 | 0 | 0 |
| 340342 | 1 | 0 | 0 | 0 | 0 |
| 340344 | 1 | 0 | 0 | 0 | 0 |
| 344345 | 1 | 0 | 0 | 0 | 0 |
| 344346 | 1 | 0 | 0 | 0 | 0 |
| 344347 | 1 | 0 | 0 | 0 | 0 |
| 347348 | 1 | 0 | 0 | 0 | 0 |
| 347349 | 1 | 0 | 0 | 0 | 0 |
| 347350 | 1 | 0 | 0 | 0 | 0 |
| 350351 | 1 | 0 | 0 | 0 | 0 |
| 351352 | 1 | 0 | 0 | 0 | 0 |
| 351353 | 1 | 0 | 0 | 0 | 0 |
| 351354 | 1 | 0 | 0 | 0 | 0 |
| 354355 | 1 | 0 | 0 | 0 | 0 |
| 354356 | 1 | 0 | 0 | 0 | 0 |
| 354357 | 1 | 0 | 0 | 0 | 0 |
| 357358 | 1 | 0 | 0 | 0 | 0 |
| 357359 | 1 | 0 | 0 | 0 | 0 |
| 357360 | 1 | 0 | 0 | 0 | 0 |
| 360361 | 1 | 0 | 0 | 0 | 0 |
| 361362 | 1 | 0 | 0 | 0 | 0 |
| 361363 | 1 | 0 | 0 | 0 | 0 |
| 361364 | 1 | 0 | 0 | 0 | 0 |
| 364365 | 1 | 0 | 0 | 0 | 0 |
| 364366 | 1 | 0 | 0 | 0 | 0 |
| 367368 | 1 | 0 | 0 | 0 | 0 |
| 367374 | 2 | 0 | 0 | 0 | 0 |
| 367376 | 1 | 0 | 0 | 0 | 0 |
| 368369 | 2 | 0 | 0 | 0 | 0 |
| 368377 | 1 | 0 | 0 | 0 | 0 |
| 369370 | 1 | 0 | 0 | 0 | 0 |
| 369371 | 1 | 0 | 0 | 0 | 0 |
| 371372 | 2 | 0 | 0 | 0 | 0 |
| 371386 | 1 | 0 | 0 | 0 | 0 |
| 372373 | 1 | 0 | 0 | 0 | 0 |
| 372374 | 1 | 0 | 0 | 0 | 0 |
| 374375 | 1 | 0 | 0 | 0 | 0 |
| 376382 | 1 | 0 | 0 | 0 | 0 |
| 377378 | 1 | 0 | 0 | 0 | 0 |
| 378379 | 1 | 0 | 0 | 0 | 0 |
| 378380 | 1 | 0 | 0 | 0 | 0 |
| 378381 | 1 | 0 | 0 | 0 | 0 |
| 382383 | 1 | 0 | 0 | 0 | 0 |
| 382384 | 1 | 0 | 0 | 0 | 0 |
| 382385 | 1 | 0 | 0 | 0 | 0 |
| 386387 | 1 | 0 | 0 | 0 | 0 |
| 386388 | 1 | 0 | 0 | 0 | 0 |
| 386389 | 1 | 0 | 0 | 0 | 0 |











|         |         |          |   |   |   |   |   |   |   |   |   |   |   |   |   |   |
|---------|---------|----------|---|---|---|---|---|---|---|---|---|---|---|---|---|---|
| 49.0600 | 11.2140 | -16.9850 | H | 0 | 0 | 0 | 0 | 0 | 0 | 0 | 0 | 0 | 0 | 0 | 0 | 0 |
| 49.8340 | 12.7640 | -17.3300 | H | 0 | 0 | 0 | 0 | 0 | 0 | 0 | 0 | 0 | 0 | 0 | 0 | 0 |
| 47.2420 | 12.9650 | -18.1470 | C | 0 | 0 | 0 | 0 | 0 | 0 | 0 | 0 | 0 | 0 | 0 | 0 | 0 |
| 46.4740 | 13.2780 | -18.8630 | H | 0 | 0 | 0 | 0 | 0 | 0 | 0 | 0 | 0 | 0 | 0 | 0 | 0 |
| 47.6370 | 13.8700 | -17.6720 | H | 0 | 0 | 0 | 0 | 0 | 0 | 0 | 0 | 0 | 0 | 0 | 0 | 0 |
| 46.7500 | 12.3740 | -17.3670 | H | 0 | 0 | 0 | 0 | 0 | 0 | 0 | 0 | 0 | 0 | 0 | 0 | 0 |
| 45.9870 | 18.4430 | -22.4250 | O | 0 | 0 | 0 | 0 | 0 | 0 | 0 | 0 | 0 | 0 | 0 | 0 | 0 |
| 45.3300 | 19.1600 | -22.4370 | H | 0 | 0 | 0 | 0 | 0 | 0 | 0 | 0 | 0 | 0 | 0 | 0 | 0 |
| 47.2540 | 19.0420 | -22.1880 | C | 0 | 0 | 0 | 0 | 0 | 0 | 0 | 0 | 0 | 0 | 0 | 0 | 0 |
| 47.4350 | 19.7930 | -22.9640 | H | 0 | 0 | 0 | 0 | 0 | 0 | 0 | 0 | 0 | 0 | 0 | 0 | 0 |
| 47.2270 | 19.5360 | -21.2120 | H | 0 | 0 | 0 | 0 | 0 | 0 | 0 | 0 | 0 | 0 | 0 | 0 | 0 |
| 48.3250 | 17.9590 | -22.2220 | C | 0 | 0 | 0 | 0 | 0 | 0 | 0 | 0 | 0 | 0 | 0 | 0 | 0 |
| 48.2990 | 17.4590 | -23.1990 | H | 0 | 0 | 0 | 0 | 0 | 0 | 0 | 0 | 0 | 0 | 0 | 0 | 0 |
| 48.0780 | 17.1860 | -21.4840 | H | 0 | 0 | 0 | 0 | 0 | 0 | 0 | 0 | 0 | 0 | 0 | 0 | 0 |
| 49.7130 | 18.5450 | -21.9580 | C | 0 | 0 | 0 | 0 | 0 | 0 | 0 | 0 | 0 | 0 | 0 | 0 | 0 |
| 49.9220 | 19.3010 | -22.7240 | H | 0 | 0 | 0 | 0 | 0 | 0 | 0 | 0 | 0 | 0 | 0 | 0 | 0 |
| 49.7300 | 19.0710 | -20.9960 | H | 0 | 0 | 0 | 0 | 0 | 0 | 0 | 0 | 0 | 0 | 0 | 0 | 0 |
| 50.7680 | 17.5370 | -22.0470 | N | 0 | 0 | 3 | 0 | 0 | 0 | 0 | 0 | 0 | 0 | 0 | 0 | 0 |
| 50.4340 | 16.6940 | -22.5270 | H | 0 | 0 | 0 | 0 | 0 | 0 | 0 | 0 | 0 | 0 | 0 | 0 | 0 |
| 1       | 2       | 1        | 0 | 0 | 0 | 0 | 0 | 0 | 0 | 0 | 0 | 0 | 0 | 0 | 0 | 0 |
| 1       | 3       | 1        | 0 | 0 | 0 | 0 | 0 | 0 | 0 | 0 | 0 | 0 | 0 | 0 | 0 | 0 |
| 3       | 4       | 1        | 0 | 0 | 0 | 0 | 0 | 0 | 0 | 0 | 0 | 0 | 0 | 0 | 0 | 0 |
| 3       | 5       | 1        | 0 | 0 | 0 | 0 | 0 | 0 | 0 | 0 | 0 | 0 | 0 | 0 | 0 | 0 |
| 3       | 6       | 1        | 0 | 0 | 0 | 0 | 0 | 0 | 0 | 0 | 0 | 0 | 0 | 0 | 0 | 0 |
| 6       | 7       | 1        | 0 | 0 | 0 | 0 | 0 | 0 | 0 | 0 | 0 | 0 | 0 | 0 | 0 | 0 |
| 6       | 8       | 1        | 0 | 0 | 0 | 0 | 0 | 0 | 0 | 0 | 0 | 0 | 0 | 0 | 0 | 0 |
| 6       | 9       | 1        | 0 | 0 | 0 | 0 | 0 | 0 | 0 | 0 | 0 | 0 | 0 | 0 | 0 | 0 |
| 9       | 10      | 1        | 0 | 0 | 0 | 0 | 0 | 0 | 0 | 0 | 0 | 0 | 0 | 0 | 0 | 0 |
| 9       | 11      | 1        | 0 | 0 | 0 | 0 | 0 | 0 | 0 | 0 | 0 | 0 | 0 | 0 | 0 | 0 |
| 9       | 12      | 1        | 0 | 0 | 0 | 0 | 0 | 0 | 0 | 0 | 0 | 0 | 0 | 0 | 0 | 0 |
| 12      | 13      | 1        | 0 | 0 | 0 | 0 | 0 | 0 | 0 | 0 | 0 | 0 | 0 | 0 | 0 | 0 |
| 12      | 47      | 1        | 0 | 0 | 0 | 0 | 0 | 0 | 0 | 0 | 0 | 0 | 0 | 0 | 0 | 0 |
| 14      | 15      | 1        | 0 | 0 | 0 | 0 | 0 | 0 | 0 | 0 | 0 | 0 | 0 | 0 | 0 | 0 |
| 14      | 16      | 1        | 0 | 0 | 0 | 0 | 0 | 0 | 0 | 0 | 0 | 0 | 0 | 0 | 0 | 0 |
| 14      | 17      | 1        | 0 | 0 | 0 | 0 | 0 | 0 | 0 | 0 | 0 | 0 | 0 | 0 | 0 | 0 |
| 14      | 56      | 1        | 0 | 0 | 0 | 0 | 0 | 0 | 0 | 0 | 0 | 0 | 0 | 0 | 0 | 0 |
| 17      | 18      | 1        | 0 | 0 | 0 | 0 | 0 | 0 | 0 | 0 | 0 | 0 | 0 | 0 | 0 | 0 |
| 18      | 19      | 1        | 0 | 0 | 0 | 0 | 0 | 0 | 0 | 0 | 0 | 0 | 0 | 0 | 0 | 0 |
| 18      | 25      | 2        | 0 | 0 | 0 | 0 | 0 | 0 | 0 | 0 | 0 | 0 | 0 | 0 | 0 | 0 |
| 19      | 20      | 1        | 0 | 0 | 0 | 0 | 0 | 0 | 0 | 0 | 0 | 0 | 0 | 0 | 0 | 0 |
| 19      | 21      | 1        | 0 | 0 | 0 | 0 | 0 | 0 | 0 | 0 | 0 | 0 | 0 | 0 | 0 | 0 |
| 19      | 22      | 1        | 0 | 0 | 0 | 0 | 0 | 0 | 0 | 0 | 0 | 0 | 0 | 0 | 0 | 0 |
| 22      | 23      | 1        | 0 | 0 | 0 | 0 | 0 | 0 | 0 | 0 | 0 | 0 | 0 | 0 | 0 | 0 |
| 22      | 24      | 1        | 0 | 0 | 0 | 0 | 0 | 0 | 0 | 0 | 0 | 0 | 0 | 0 | 0 | 0 |
| 22      | 76      | 1        | 0 | 0 | 0 | 0 | 0 | 0 | 0 | 0 | 0 | 0 | 0 | 0 | 0 | 0 |
| 26      | 27      | 1        | 0 | 0 | 0 | 0 | 0 | 0 | 0 | 0 | 0 | 0 | 0 | 0 | 0 | 0 |
| 26      | 34      | 1        | 0 | 0 | 0 | 0 | 0 | 0 | 0 | 0 | 0 | 0 | 0 | 0 | 0 | 0 |
| 26      | 37      | 1        | 0 | 0 | 0 | 0 | 0 | 0 | 0 | 0 | 0 | 0 | 0 | 0 | 0 | 0 |
| 26      | 40      | 1        | 0 | 0 | 0 | 0 | 0 | 0 | 0 | 0 | 0 | 0 | 0 | 0 | 0 | 0 |
| 27      | 28      | 1        | 0 | 0 | 0 | 0 | 0 | 0 | 0 | 0 | 0 | 0 | 0 | 0 | 0 | 0 |
| 27      | 29      | 1        | 0 | 0 | 0 | 0 | 0 | 0 | 0 | 0 | 0 | 0 | 0 | 0 | 0 | 0 |
| 27      | 30      | 1        | 0 | 0 | 0 | 0 | 0 | 0 | 0 | 0 | 0 | 0 | 0 | 0 | 0 | 0 |
| 30      | 31      | 1        | 0 | 0 | 0 | 0 | 0 | 0 | 0 | 0 | 0 | 0 | 0 | 0 | 0 | 0 |
| 31      | 32      | 1        | 0 | 0 | 0 | 0 | 0 | 0 | 0 | 0 | 0 | 0 | 0 | 0 | 0 | 0 |
| 31      | 33      | 1        | 0 | 0 | 0 | 0 | 0 | 0 | 0 | 0 | 0 | 0 | 0 | 0 | 0 | 0 |
| 31      | 56      | 1        | 0 | 0 | 0 | 0 | 0 | 0 | 0 | 0 | 0 | 0 | 0 | 0 | 0 | 0 |
| 33      | 34      | 1        | 0 | 0 | 0 | 0 | 0 | 0 | 0 | 0 | 0 | 0 | 0 | 0 | 0 | 0 |
| 34      | 35      | 1        | 0 | 0 | 0 | 0 | 0 | 0 | 0 | 0 | 0 | 0 | 0 | 0 | 0 | 0 |
| 34      | 36      | 1        | 0 | 0 | 0 | 0 | 0 | 0 | 0 | 0 | 0 | 0 | 0 | 0 | 0 | 0 |
| 37      | 38      | 1        | 0 | 0 | 0 | 0 | 0 | 0 | 0 | 0 | 0 | 0 | 0 | 0 | 0 | 0 |
| 37      | 39      | 1        | 0 | 0 | 0 | 0 | 0 | 0 | 0 | 0 | 0 | 0 | 0 | 0 | 0 | 0 |
| 37      | 54      | 1        | 0 | 0 | 0 | 0 | 0 | 0 | 0 | 0 | 0 | 0 | 0 | 0 | 0 | 0 |
| 40      | 41      | 1        | 0 | 0 | 0 | 0 | 0 | 0 | 0 | 0 | 0 | 0 | 0 | 0 | 0 | 0 |
| 40      | 42      | 1        | 0 | 0 | 0 | 0 | 0 | 0 | 0 | 0 | 0 | 0 | 0 | 0 | 0 | 0 |
| 40      | 43      | 1        | 0 | 0 | 0 | 0 | 0 | 0 | 0 | 0 | 0 | 0 | 0 | 0 | 0 | 0 |
| 43      | 44      | 1        | 0 | 0 | 0 | 0 | 0 | 0 | 0 | 0 | 0 | 0 | 0 | 0 | 0 | 0 |
| 43      | 45      | 1        | 0 | 0 | 0 | 0 | 0 | 0 | 0 | 0 | 0 | 0 | 0 | 0 | 0 | 0 |
| 43      | 46      | 1        | 0 | 0 | 0 | 0 | 0 | 0 | 0 | 0 | 0 | 0 | 0 | 0 | 0 | 0 |
| 47      | 48      | 1        | 0 | 0 | 0 | 0 | 0 | 0 | 0 | 0 | 0 | 0 | 0 | 0 | 0 | 0 |
| 47      | 49      | 1        | 0 | 0 | 0 | 0 | 0 | 0 | 0 | 0 | 0 | 0 | 0 | 0 | 0 | 0 |
| 47      | 50      | 1        | 0 | 0 | 0 | 0 | 0 | 0 | 0 | 0 | 0 | 0 | 0 | 0 | 0 | 0 |
| 50      | 51      | 1        | 0 | 0 | 0 | 0 | 0 | 0 | 0 | 0 | 0 | 0 | 0 | 0 | 0 | 0 |
| 50      | 52      | 1        | 0 | 0 | 0 | 0 | 0 | 0 | 0 | 0 | 0 | 0 | 0 | 0 | 0 | 0 |
| 50      | 53      | 1        | 0 | 0 | 0 | 0 | 0 | 0 | 0 | 0 | 0 | 0 | 0 | 0 | 0 | 0 |
| 53      | 54      | 1        | 0 | 0 | 0 | 0 | 0 | 0 | 0 | 0 | 0 | 0 | 0 | 0 | 0 | 0 |
| 53      | 55      | 2        | 0 | 0 | 0 | 0 | 0 | 0 | 0 | 0 | 0 | 0 | 0 | 0 | 0 | 0 |
| 56      | 57      | 1        | 0 | 0 | 0 | 0 | 0 | 0 | 0 | 0 | 0 | 0 | 0 | 0 | 0 | 0 |
| 56      | 61      | 1        | 0 | 0 | 0 | 0 | 0 | 0 | 0 | 0 | 0 | 0 | 0 | 0 | 0 | 0 |
| 57      | 58      | 1        | 0 | 0 | 0 | 0 | 0 | 0 | 0 | 0 | 0 | 0 | 0 | 0 | 0 | 0 |
| 57      | 59      | 1        | 0 | 0 | 0 | 0 | 0 | 0 | 0 | 0 | 0 | 0 | 0 | 0 | 0 | 0 |
| 57      | 60      | 1        | 0 | 0 | 0 | 0 | 0 | 0 | 0 | 0 | 0 | 0 | 0 | 0 | 0 | 0 |

|     |     |   |   |   |   |   |
|-----|-----|---|---|---|---|---|
| 61  | 62  | 1 | 0 | 0 | 0 | 0 |
| 61  | 63  | 1 | 0 | 0 | 0 | 0 |
| 61  | 64  | 1 | 0 | 0 | 0 | 0 |
| 65  | 66  | 1 | 0 | 0 | 0 | 0 |
| 65  | 67  | 1 | 0 | 0 | 0 | 0 |
| 67  | 68  | 1 | 0 | 0 | 0 | 0 |
| 67  | 69  | 1 | 0 | 0 | 0 | 0 |
| 67  | 70  | 1 | 0 | 0 | 0 | 0 |
| 70  | 71  | 1 | 0 | 0 | 0 | 0 |
| 70  | 72  | 1 | 0 | 0 | 0 | 0 |
| 70  | 73  | 1 | 0 | 0 | 0 | 0 |
| 73  | 74  | 1 | 0 | 0 | 0 | 0 |
| 73  | 75  | 1 | 0 | 0 | 0 | 0 |
| 73  | 76  | 1 | 0 | 0 | 0 | 0 |
| 76  | 110 | 1 | 0 | 0 | 0 | 0 |
| 77  | 78  | 1 | 0 | 0 | 0 | 0 |
| 77  | 79  | 1 | 0 | 0 | 0 | 0 |
| 77  | 80  | 1 | 0 | 0 | 0 | 0 |
| 77  | 119 | 1 | 0 | 0 | 0 | 0 |
| 80  | 81  | 1 | 0 | 0 | 0 | 0 |
| 81  | 82  | 1 | 0 | 0 | 0 | 0 |
| 81  | 88  | 2 | 0 | 0 | 0 | 0 |
| 82  | 83  | 1 | 0 | 0 | 0 | 0 |
| 82  | 84  | 1 | 0 | 0 | 0 | 0 |
| 82  | 85  | 1 | 0 | 0 | 0 | 0 |
| 85  | 86  | 1 | 0 | 0 | 0 | 0 |
| 85  | 87  | 1 | 0 | 0 | 0 | 0 |
| 85  | 139 | 1 | 0 | 0 | 0 | 0 |
| 89  | 90  | 1 | 0 | 0 | 0 | 0 |
| 89  | 97  | 1 | 0 | 0 | 0 | 0 |
| 89  | 100 | 1 | 0 | 0 | 0 | 0 |
| 89  | 103 | 1 | 0 | 0 | 0 | 0 |
| 90  | 91  | 1 | 0 | 0 | 0 | 0 |
| 90  | 92  | 1 | 0 | 0 | 0 | 0 |
| 90  | 93  | 1 | 0 | 0 | 0 | 0 |
| 93  | 94  | 1 | 0 | 0 | 0 | 0 |
| 94  | 95  | 1 | 0 | 0 | 0 | 0 |
| 94  | 96  | 1 | 0 | 0 | 0 | 0 |
| 94  | 119 | 1 | 0 | 0 | 0 | 0 |
| 96  | 97  | 1 | 0 | 0 | 0 | 0 |
| 97  | 98  | 1 | 0 | 0 | 0 | 0 |
| 97  | 99  | 1 | 0 | 0 | 0 | 0 |
| 100 | 101 | 1 | 0 | 0 | 0 | 0 |
| 100 | 102 | 1 | 0 | 0 | 0 | 0 |
| 100 | 117 | 1 | 0 | 0 | 0 | 0 |
| 103 | 104 | 1 | 0 | 0 | 0 | 0 |
| 103 | 105 | 1 | 0 | 0 | 0 | 0 |
| 103 | 106 | 1 | 0 | 0 | 0 | 0 |
| 106 | 107 | 1 | 0 | 0 | 0 | 0 |
| 106 | 108 | 1 | 0 | 0 | 0 | 0 |
| 106 | 109 | 1 | 0 | 0 | 0 | 0 |
| 110 | 111 | 1 | 0 | 0 | 0 | 0 |
| 110 | 112 | 1 | 0 | 0 | 0 | 0 |
| 110 | 113 | 1 | 0 | 0 | 0 | 0 |
| 113 | 114 | 1 | 0 | 0 | 0 | 0 |
| 113 | 115 | 1 | 0 | 0 | 0 | 0 |
| 113 | 116 | 1 | 0 | 0 | 0 | 0 |
| 116 | 117 | 1 | 0 | 0 | 0 | 0 |
| 116 | 118 | 2 | 0 | 0 | 0 | 0 |
| 119 | 120 | 1 | 0 | 0 | 0 | 0 |
| 119 | 124 | 1 | 0 | 0 | 0 | 0 |
| 120 | 121 | 1 | 0 | 0 | 0 | 0 |
| 120 | 122 | 1 | 0 | 0 | 0 | 0 |
| 120 | 123 | 1 | 0 | 0 | 0 | 0 |
| 124 | 125 | 1 | 0 | 0 | 0 | 0 |
| 124 | 126 | 1 | 0 | 0 | 0 | 0 |
| 124 | 127 | 1 | 0 | 0 | 0 | 0 |
| 128 | 129 | 1 | 0 | 0 | 0 | 0 |
| 128 | 130 | 1 | 0 | 0 | 0 | 0 |
| 130 | 131 | 1 | 0 | 0 | 0 | 0 |
| 130 | 132 | 1 | 0 | 0 | 0 | 0 |
| 130 | 133 | 1 | 0 | 0 | 0 | 0 |
| 133 | 134 | 1 | 0 | 0 | 0 | 0 |
| 133 | 135 | 1 | 0 | 0 | 0 | 0 |
| 133 | 136 | 1 | 0 | 0 | 0 | 0 |
| 136 | 137 | 1 | 0 | 0 | 0 | 0 |
| 136 | 138 | 1 | 0 | 0 | 0 | 0 |
| 136 | 139 | 1 | 0 | 0 | 0 | 0 |
| 139 | 173 | 1 | 0 | 0 | 0 | 0 |
| 140 | 141 | 1 | 0 | 0 | 0 | 0 |
| 140 | 142 | 1 | 0 | 0 | 0 | 0 |

|        |   |   |   |   |   |
|--------|---|---|---|---|---|
| 140143 | 1 | 0 | 0 | 0 | 0 |
| 140182 | 1 | 0 | 0 | 0 | 0 |
| 143144 | 1 | 0 | 0 | 0 | 0 |
| 144145 | 1 | 0 | 0 | 0 | 0 |
| 144151 | 2 | 0 | 0 | 0 | 0 |
| 145146 | 1 | 0 | 0 | 0 | 0 |
| 145147 | 1 | 0 | 0 | 0 | 0 |
| 145148 | 1 | 0 | 0 | 0 | 0 |
| 148149 | 1 | 0 | 0 | 0 | 0 |
| 148150 | 1 | 0 | 0 | 0 | 0 |
| 148202 | 1 | 0 | 0 | 0 | 0 |
| 152153 | 1 | 0 | 0 | 0 | 0 |
| 152160 | 1 | 0 | 0 | 0 | 0 |
| 152163 | 1 | 0 | 0 | 0 | 0 |
| 152166 | 1 | 0 | 0 | 0 | 0 |
| 153154 | 1 | 0 | 0 | 0 | 0 |
| 153155 | 1 | 0 | 0 | 0 | 0 |
| 153156 | 1 | 0 | 0 | 0 | 0 |
| 156157 | 1 | 0 | 0 | 0 | 0 |
| 157158 | 1 | 0 | 0 | 0 | 0 |
| 157159 | 1 | 0 | 0 | 0 | 0 |
| 157182 | 1 | 0 | 0 | 0 | 0 |
| 159160 | 1 | 0 | 0 | 0 | 0 |
| 160161 | 1 | 0 | 0 | 0 | 0 |
| 160162 | 1 | 0 | 0 | 0 | 0 |
| 163164 | 1 | 0 | 0 | 0 | 0 |
| 163165 | 1 | 0 | 0 | 0 | 0 |
| 163180 | 1 | 0 | 0 | 0 | 0 |
| 166167 | 1 | 0 | 0 | 0 | 0 |
| 166168 | 1 | 0 | 0 | 0 | 0 |
| 166169 | 1 | 0 | 0 | 0 | 0 |
| 169170 | 1 | 0 | 0 | 0 | 0 |
| 169171 | 1 | 0 | 0 | 0 | 0 |
| 169172 | 1 | 0 | 0 | 0 | 0 |
| 173174 | 1 | 0 | 0 | 0 | 0 |
| 173175 | 1 | 0 | 0 | 0 | 0 |
| 173176 | 1 | 0 | 0 | 0 | 0 |
| 176177 | 1 | 0 | 0 | 0 | 0 |
| 176178 | 1 | 0 | 0 | 0 | 0 |
| 176179 | 1 | 0 | 0 | 0 | 0 |
| 179180 | 1 | 0 | 0 | 0 | 0 |
| 179181 | 2 | 0 | 0 | 0 | 0 |
| 182183 | 1 | 0 | 0 | 0 | 0 |
| 182187 | 1 | 0 | 0 | 0 | 0 |
| 183184 | 1 | 0 | 0 | 0 | 0 |
| 183185 | 1 | 0 | 0 | 0 | 0 |
| 183186 | 1 | 0 | 0 | 0 | 0 |
| 187188 | 1 | 0 | 0 | 0 | 0 |
| 187189 | 1 | 0 | 0 | 0 | 0 |
| 187190 | 1 | 0 | 0 | 0 | 0 |
| 191192 | 1 | 0 | 0 | 0 | 0 |
| 191193 | 1 | 0 | 0 | 0 | 0 |
| 193194 | 1 | 0 | 0 | 0 | 0 |
| 193195 | 1 | 0 | 0 | 0 | 0 |
| 193196 | 1 | 0 | 0 | 0 | 0 |
| 196197 | 1 | 0 | 0 | 0 | 0 |
| 196198 | 1 | 0 | 0 | 0 | 0 |
| 196199 | 1 | 0 | 0 | 0 | 0 |
| 199200 | 1 | 0 | 0 | 0 | 0 |
| 199201 | 1 | 0 | 0 | 0 | 0 |
| 199202 | 1 | 0 | 0 | 0 | 0 |
| 202236 | 1 | 0 | 0 | 0 | 0 |
| 203204 | 1 | 0 | 0 | 0 | 0 |
| 203205 | 1 | 0 | 0 | 0 | 0 |
| 203206 | 1 | 0 | 0 | 0 | 0 |
| 203245 | 1 | 0 | 0 | 0 | 0 |
| 206207 | 1 | 0 | 0 | 0 | 0 |
| 207208 | 1 | 0 | 0 | 0 | 0 |
| 207214 | 2 | 0 | 0 | 0 | 0 |
| 208209 | 1 | 0 | 0 | 0 | 0 |
| 208210 | 1 | 0 | 0 | 0 | 0 |
| 208211 | 1 | 0 | 0 | 0 | 0 |
| 211212 | 1 | 0 | 0 | 0 | 0 |
| 211213 | 1 | 0 | 0 | 0 | 0 |
| 211265 | 1 | 0 | 0 | 0 | 0 |
| 215216 | 1 | 0 | 0 | 0 | 0 |
| 215223 | 1 | 0 | 0 | 0 | 0 |
| 215226 | 1 | 0 | 0 | 0 | 0 |
| 215229 | 1 | 0 | 0 | 0 | 0 |
| 216217 | 1 | 0 | 0 | 0 | 0 |
| 216218 | 1 | 0 | 0 | 0 | 0 |

|        |   |   |   |   |   |
|--------|---|---|---|---|---|
| 216219 | 1 | 0 | 0 | 0 | 0 |
| 219220 | 1 | 0 | 0 | 0 | 0 |
| 220221 | 1 | 0 | 0 | 0 | 0 |
| 220222 | 1 | 0 | 0 | 0 | 0 |
| 220245 | 1 | 0 | 0 | 0 | 0 |
| 222223 | 1 | 0 | 0 | 0 | 0 |
| 223224 | 1 | 0 | 0 | 0 | 0 |
| 223225 | 1 | 0 | 0 | 0 | 0 |
| 226227 | 1 | 0 | 0 | 0 | 0 |
| 226228 | 1 | 0 | 0 | 0 | 0 |
| 226243 | 1 | 0 | 0 | 0 | 0 |
| 229230 | 1 | 0 | 0 | 0 | 0 |
| 229231 | 1 | 0 | 0 | 0 | 0 |
| 229232 | 1 | 0 | 0 | 0 | 0 |
| 232233 | 1 | 0 | 0 | 0 | 0 |
| 232234 | 1 | 0 | 0 | 0 | 0 |
| 232235 | 1 | 0 | 0 | 0 | 0 |
| 236237 | 1 | 0 | 0 | 0 | 0 |
| 236238 | 1 | 0 | 0 | 0 | 0 |
| 236239 | 1 | 0 | 0 | 0 | 0 |
| 239240 | 1 | 0 | 0 | 0 | 0 |
| 239241 | 1 | 0 | 0 | 0 | 0 |
| 239242 | 1 | 0 | 0 | 0 | 0 |
| 242243 | 1 | 0 | 0 | 0 | 0 |
| 242244 | 2 | 0 | 0 | 0 | 0 |
| 245246 | 1 | 0 | 0 | 0 | 0 |
| 245250 | 1 | 0 | 0 | 0 | 0 |
| 246247 | 1 | 0 | 0 | 0 | 0 |
| 246248 | 1 | 0 | 0 | 0 | 0 |
| 246249 | 1 | 0 | 0 | 0 | 0 |
| 250251 | 1 | 0 | 0 | 0 | 0 |
| 250252 | 1 | 0 | 0 | 0 | 0 |
| 250253 | 1 | 0 | 0 | 0 | 0 |
| 254255 | 1 | 0 | 0 | 0 | 0 |
| 254256 | 1 | 0 | 0 | 0 | 0 |
| 256257 | 1 | 0 | 0 | 0 | 0 |
| 256258 | 1 | 0 | 0 | 0 | 0 |
| 256259 | 1 | 0 | 0 | 0 | 0 |
| 259260 | 1 | 0 | 0 | 0 | 0 |
| 259261 | 1 | 0 | 0 | 0 | 0 |
| 259262 | 1 | 0 | 0 | 0 | 0 |
| 262263 | 1 | 0 | 0 | 0 | 0 |
| 262264 | 1 | 0 | 0 | 0 | 0 |
| 262265 | 1 | 0 | 0 | 0 | 0 |
| 265299 | 1 | 0 | 0 | 0 | 0 |
| 266267 | 1 | 0 | 0 | 0 | 0 |
| 266268 | 1 | 0 | 0 | 0 | 0 |
| 266269 | 1 | 0 | 0 | 0 | 0 |
| 266308 | 1 | 0 | 0 | 0 | 0 |
| 269270 | 1 | 0 | 0 | 0 | 0 |
| 270271 | 1 | 0 | 0 | 0 | 0 |
| 270277 | 2 | 0 | 0 | 0 | 0 |
| 271272 | 1 | 0 | 0 | 0 | 0 |
| 271273 | 1 | 0 | 0 | 0 | 0 |
| 271274 | 1 | 0 | 0 | 0 | 0 |
| 274275 | 1 | 0 | 0 | 0 | 0 |
| 274276 | 1 | 0 | 0 | 0 | 0 |
| 274328 | 1 | 0 | 0 | 0 | 0 |
| 278279 | 1 | 0 | 0 | 0 | 0 |
| 278286 | 1 | 0 | 0 | 0 | 0 |
| 278289 | 1 | 0 | 0 | 0 | 0 |
| 278292 | 1 | 0 | 0 | 0 | 0 |
| 279280 | 1 | 0 | 0 | 0 | 0 |
| 279281 | 1 | 0 | 0 | 0 | 0 |
| 279282 | 1 | 0 | 0 | 0 | 0 |
| 282283 | 1 | 0 | 0 | 0 | 0 |
| 283284 | 1 | 0 | 0 | 0 | 0 |
| 283285 | 1 | 0 | 0 | 0 | 0 |
| 283308 | 1 | 0 | 0 | 0 | 0 |
| 285286 | 1 | 0 | 0 | 0 | 0 |
| 286287 | 1 | 0 | 0 | 0 | 0 |
| 286288 | 1 | 0 | 0 | 0 | 0 |
| 289290 | 1 | 0 | 0 | 0 | 0 |
| 289291 | 1 | 0 | 0 | 0 | 0 |
| 289306 | 1 | 0 | 0 | 0 | 0 |
| 292293 | 1 | 0 | 0 | 0 | 0 |
| 292294 | 1 | 0 | 0 | 0 | 0 |
| 292295 | 1 | 0 | 0 | 0 | 0 |
| 295296 | 1 | 0 | 0 | 0 | 0 |
| 295297 | 1 | 0 | 0 | 0 | 0 |
| 295298 | 1 | 0 | 0 | 0 | 0 |













|     |     |   |   |   |   |   |
|-----|-----|---|---|---|---|---|
| 28  | 31  | 1 | 0 | 0 | 0 | 0 |
| 31  | 32  | 1 | 0 | 0 | 0 | 0 |
| 32  | 33  | 1 | 0 | 0 | 0 | 0 |
| 32  | 34  | 1 | 0 | 0 | 0 | 0 |
| 32  | 57  | 1 | 0 | 0 | 0 | 0 |
| 34  | 35  | 1 | 0 | 0 | 0 | 0 |
| 35  | 36  | 1 | 0 | 0 | 0 | 0 |
| 35  | 37  | 1 | 0 | 0 | 0 | 0 |
| 38  | 39  | 1 | 0 | 0 | 0 | 0 |
| 38  | 40  | 1 | 0 | 0 | 0 | 0 |
| 38  | 55  | 1 | 0 | 0 | 0 | 0 |
| 41  | 42  | 1 | 0 | 0 | 0 | 0 |
| 41  | 43  | 1 | 0 | 0 | 0 | 0 |
| 41  | 44  | 1 | 0 | 0 | 0 | 0 |
| 44  | 45  | 1 | 0 | 0 | 0 | 0 |
| 44  | 46  | 1 | 0 | 0 | 0 | 0 |
| 44  | 47  | 1 | 0 | 0 | 0 | 0 |
| 48  | 49  | 1 | 0 | 0 | 0 | 0 |
| 48  | 50  | 1 | 0 | 0 | 0 | 0 |
| 48  | 51  | 1 | 0 | 0 | 0 | 0 |
| 51  | 52  | 1 | 0 | 0 | 0 | 0 |
| 51  | 53  | 1 | 0 | 0 | 0 | 0 |
| 51  | 54  | 1 | 0 | 0 | 0 | 0 |
| 54  | 55  | 1 | 0 | 0 | 0 | 0 |
| 54  | 56  | 2 | 0 | 0 | 0 | 0 |
| 57  | 58  | 1 | 0 | 0 | 0 | 0 |
| 57  | 62  | 1 | 0 | 0 | 0 | 0 |
| 58  | 59  | 1 | 0 | 0 | 0 | 0 |
| 58  | 60  | 1 | 0 | 0 | 0 | 0 |
| 58  | 61  | 1 | 0 | 0 | 0 | 0 |
| 62  | 63  | 1 | 0 | 0 | 0 | 0 |
| 62  | 64  | 1 | 0 | 0 | 0 | 0 |
| 62  | 65  | 1 | 0 | 0 | 0 | 0 |
| 66  | 67  | 1 | 0 | 0 | 0 | 0 |
| 66  | 68  | 1 | 0 | 0 | 0 | 0 |
| 68  | 69  | 1 | 0 | 0 | 0 | 0 |
| 68  | 70  | 1 | 0 | 0 | 0 | 0 |
| 68  | 71  | 1 | 0 | 0 | 0 | 0 |
| 71  | 72  | 1 | 0 | 0 | 0 | 0 |
| 71  | 73  | 1 | 0 | 0 | 0 | 0 |
| 71  | 77  | 1 | 0 | 0 | 0 | 0 |
| 73  | 74  | 1 | 0 | 0 | 0 | 0 |
| 73  | 75  | 1 | 0 | 0 | 0 | 0 |
| 73  | 76  | 1 | 0 | 0 | 0 | 0 |
| 76  | 112 | 1 | 0 | 0 | 0 | 0 |
| 77  | 78  | 1 | 0 | 0 | 0 | 0 |
| 79  | 80  | 1 | 0 | 0 | 0 | 0 |
| 79  | 81  | 1 | 0 | 0 | 0 | 0 |
| 79  | 82  | 1 | 0 | 0 | 0 | 0 |
| 79  | 121 | 1 | 0 | 0 | 0 | 0 |
| 82  | 83  | 1 | 0 | 0 | 0 | 0 |
| 83  | 84  | 1 | 0 | 0 | 0 | 0 |
| 83  | 90  | 2 | 0 | 0 | 0 | 0 |
| 84  | 85  | 1 | 0 | 0 | 0 | 0 |
| 84  | 86  | 1 | 0 | 0 | 0 | 0 |
| 84  | 87  | 1 | 0 | 0 | 0 | 0 |
| 87  | 88  | 1 | 0 | 0 | 0 | 0 |
| 87  | 89  | 1 | 0 | 0 | 0 | 0 |
| 87  | 140 | 1 | 0 | 0 | 0 | 0 |
| 91  | 92  | 1 | 0 | 0 | 0 | 0 |
| 91  | 99  | 1 | 0 | 0 | 0 | 0 |
| 91  | 102 | 1 | 0 | 0 | 0 | 0 |
| 91  | 105 | 1 | 0 | 0 | 0 | 0 |
| 92  | 93  | 1 | 0 | 0 | 0 | 0 |
| 92  | 94  | 1 | 0 | 0 | 0 | 0 |
| 92  | 95  | 1 | 0 | 0 | 0 | 0 |
| 95  | 96  | 1 | 0 | 0 | 0 | 0 |
| 96  | 97  | 1 | 0 | 0 | 0 | 0 |
| 96  | 98  | 1 | 0 | 0 | 0 | 0 |
| 96  | 121 | 1 | 0 | 0 | 0 | 0 |
| 98  | 99  | 1 | 0 | 0 | 0 | 0 |
| 99  | 100 | 1 | 0 | 0 | 0 | 0 |
| 99  | 101 | 1 | 0 | 0 | 0 | 0 |
| 102 | 103 | 1 | 0 | 0 | 0 | 0 |
| 102 | 104 | 1 | 0 | 0 | 0 | 0 |
| 102 | 119 | 1 | 0 | 0 | 0 | 0 |
| 105 | 106 | 1 | 0 | 0 | 0 | 0 |
| 105 | 107 | 1 | 0 | 0 | 0 | 0 |
| 105 | 108 | 1 | 0 | 0 | 0 | 0 |
| 108 | 109 | 1 | 0 | 0 | 0 | 0 |
| 108 | 110 | 1 | 0 | 0 | 0 | 0 |

|        |   |   |   |   |   |
|--------|---|---|---|---|---|
| 108111 | 1 | 0 | 0 | 0 | 0 |
| 112113 | 1 | 0 | 0 | 0 | 0 |
| 112114 | 1 | 0 | 0 | 0 | 0 |
| 112115 | 1 | 0 | 0 | 0 | 0 |
| 115116 | 1 | 0 | 0 | 0 | 0 |
| 115117 | 1 | 0 | 0 | 0 | 0 |
| 115118 | 1 | 0 | 0 | 0 | 0 |
| 118119 | 1 | 0 | 0 | 0 | 0 |
| 118120 | 2 | 0 | 0 | 0 | 0 |
| 121122 | 1 | 0 | 0 | 0 | 0 |
| 121126 | 1 | 0 | 0 | 0 | 0 |
| 122123 | 1 | 0 | 0 | 0 | 0 |
| 122124 | 1 | 0 | 0 | 0 | 0 |
| 122125 | 1 | 0 | 0 | 0 | 0 |
| 126127 | 1 | 0 | 0 | 0 | 0 |
| 126128 | 1 | 0 | 0 | 0 | 0 |
| 126129 | 1 | 0 | 0 | 0 | 0 |
| 130131 | 1 | 0 | 0 | 0 | 0 |
| 130132 | 1 | 0 | 0 | 0 | 0 |
| 132133 | 1 | 0 | 0 | 0 | 0 |
| 132134 | 1 | 0 | 0 | 0 | 0 |
| 132135 | 1 | 0 | 0 | 0 | 0 |
| 135136 | 1 | 0 | 0 | 0 | 0 |
| 135137 | 1 | 0 | 0 | 0 | 0 |
| 135141 | 1 | 0 | 0 | 0 | 0 |
| 137138 | 1 | 0 | 0 | 0 | 0 |
| 137139 | 1 | 0 | 0 | 0 | 0 |
| 137140 | 1 | 0 | 0 | 0 | 0 |
| 140176 | 1 | 0 | 0 | 0 | 0 |
| 141142 | 1 | 0 | 0 | 0 | 0 |
| 143144 | 1 | 0 | 0 | 0 | 0 |
| 143145 | 1 | 0 | 0 | 0 | 0 |
| 143146 | 1 | 0 | 0 | 0 | 0 |
| 143185 | 1 | 0 | 0 | 0 | 0 |
| 146147 | 1 | 0 | 0 | 0 | 0 |
| 147148 | 1 | 0 | 0 | 0 | 0 |
| 147154 | 2 | 0 | 0 | 0 | 0 |
| 148149 | 1 | 0 | 0 | 0 | 0 |
| 148150 | 1 | 0 | 0 | 0 | 0 |
| 148151 | 1 | 0 | 0 | 0 | 0 |
| 151152 | 1 | 0 | 0 | 0 | 0 |
| 151153 | 1 | 0 | 0 | 0 | 0 |
| 151204 | 1 | 0 | 0 | 0 | 0 |
| 155156 | 1 | 0 | 0 | 0 | 0 |
| 155163 | 1 | 0 | 0 | 0 | 0 |
| 155166 | 1 | 0 | 0 | 0 | 0 |
| 155169 | 1 | 0 | 0 | 0 | 0 |
| 156157 | 1 | 0 | 0 | 0 | 0 |
| 156158 | 1 | 0 | 0 | 0 | 0 |
| 156159 | 1 | 0 | 0 | 0 | 0 |
| 159160 | 1 | 0 | 0 | 0 | 0 |
| 160161 | 1 | 0 | 0 | 0 | 0 |
| 160162 | 1 | 0 | 0 | 0 | 0 |
| 160185 | 1 | 0 | 0 | 0 | 0 |
| 162163 | 1 | 0 | 0 | 0 | 0 |
| 163164 | 1 | 0 | 0 | 0 | 0 |
| 163165 | 1 | 0 | 0 | 0 | 0 |
| 166167 | 1 | 0 | 0 | 0 | 0 |
| 166168 | 1 | 0 | 0 | 0 | 0 |
| 166183 | 1 | 0 | 0 | 0 | 0 |
| 169170 | 1 | 0 | 0 | 0 | 0 |
| 169171 | 1 | 0 | 0 | 0 | 0 |
| 169172 | 1 | 0 | 0 | 0 | 0 |
| 172173 | 1 | 0 | 0 | 0 | 0 |
| 172174 | 1 | 0 | 0 | 0 | 0 |
| 172175 | 1 | 0 | 0 | 0 | 0 |
| 176177 | 1 | 0 | 0 | 0 | 0 |
| 176178 | 1 | 0 | 0 | 0 | 0 |
| 176179 | 1 | 0 | 0 | 0 | 0 |
| 179180 | 1 | 0 | 0 | 0 | 0 |
| 179181 | 1 | 0 | 0 | 0 | 0 |
| 179182 | 1 | 0 | 0 | 0 | 0 |
| 182183 | 1 | 0 | 0 | 0 | 0 |
| 182184 | 2 | 0 | 0 | 0 | 0 |
| 185186 | 1 | 0 | 0 | 0 | 0 |
| 185190 | 1 | 0 | 0 | 0 | 0 |
| 186187 | 1 | 0 | 0 | 0 | 0 |
| 186188 | 1 | 0 | 0 | 0 | 0 |
| 186189 | 1 | 0 | 0 | 0 | 0 |
| 190191 | 1 | 0 | 0 | 0 | 0 |
| 190192 | 1 | 0 | 0 | 0 | 0 |

|        |   |   |   |   |   |
|--------|---|---|---|---|---|
| 190193 | 1 | 0 | 0 | 0 | 0 |
| 194195 | 1 | 0 | 0 | 0 | 0 |
| 194196 | 1 | 0 | 0 | 0 | 0 |
| 196197 | 1 | 0 | 0 | 0 | 0 |
| 196198 | 1 | 0 | 0 | 0 | 0 |
| 196199 | 1 | 0 | 0 | 0 | 0 |
| 199200 | 1 | 0 | 0 | 0 | 0 |
| 199201 | 1 | 0 | 0 | 0 | 0 |
| 199205 | 1 | 0 | 0 | 0 | 0 |
| 201202 | 1 | 0 | 0 | 0 | 0 |
| 201203 | 1 | 0 | 0 | 0 | 0 |
| 201204 | 1 | 0 | 0 | 0 | 0 |
| 204240 | 1 | 0 | 0 | 0 | 0 |
| 205206 | 1 | 0 | 0 | 0 | 0 |
| 207208 | 1 | 0 | 0 | 0 | 0 |
| 207209 | 1 | 0 | 0 | 0 | 0 |
| 207210 | 1 | 0 | 0 | 0 | 0 |
| 207249 | 1 | 0 | 0 | 0 | 0 |
| 210211 | 1 | 0 | 0 | 0 | 0 |
| 211212 | 1 | 0 | 0 | 0 | 0 |
| 211218 | 2 | 0 | 0 | 0 | 0 |
| 212213 | 1 | 0 | 0 | 0 | 0 |
| 212214 | 1 | 0 | 0 | 0 | 0 |
| 212215 | 1 | 0 | 0 | 0 | 0 |
| 215216 | 1 | 0 | 0 | 0 | 0 |
| 215217 | 1 | 0 | 0 | 0 | 0 |
| 215268 | 1 | 0 | 0 | 0 | 0 |
| 219220 | 1 | 0 | 0 | 0 | 0 |
| 219227 | 1 | 0 | 0 | 0 | 0 |
| 219230 | 1 | 0 | 0 | 0 | 0 |
| 219233 | 1 | 0 | 0 | 0 | 0 |
| 220221 | 1 | 0 | 0 | 0 | 0 |
| 220222 | 1 | 0 | 0 | 0 | 0 |
| 220223 | 1 | 0 | 0 | 0 | 0 |
| 223224 | 1 | 0 | 0 | 0 | 0 |
| 224225 | 1 | 0 | 0 | 0 | 0 |
| 224226 | 1 | 0 | 0 | 0 | 0 |
| 224249 | 1 | 0 | 0 | 0 | 0 |
| 226227 | 1 | 0 | 0 | 0 | 0 |
| 227228 | 1 | 0 | 0 | 0 | 0 |
| 227229 | 1 | 0 | 0 | 0 | 0 |
| 230231 | 1 | 0 | 0 | 0 | 0 |
| 230232 | 1 | 0 | 0 | 0 | 0 |
| 230247 | 1 | 0 | 0 | 0 | 0 |
| 233234 | 1 | 0 | 0 | 0 | 0 |
| 233235 | 1 | 0 | 0 | 0 | 0 |
| 233236 | 1 | 0 | 0 | 0 | 0 |
| 236237 | 1 | 0 | 0 | 0 | 0 |
| 236238 | 1 | 0 | 0 | 0 | 0 |
| 236239 | 1 | 0 | 0 | 0 | 0 |
| 240241 | 1 | 0 | 0 | 0 | 0 |
| 240242 | 1 | 0 | 0 | 0 | 0 |
| 240243 | 1 | 0 | 0 | 0 | 0 |
| 243244 | 1 | 0 | 0 | 0 | 0 |
| 243245 | 1 | 0 | 0 | 0 | 0 |
| 243246 | 1 | 0 | 0 | 0 | 0 |
| 246247 | 1 | 0 | 0 | 0 | 0 |
| 246248 | 2 | 0 | 0 | 0 | 0 |
| 249250 | 1 | 0 | 0 | 0 | 0 |
| 249254 | 1 | 0 | 0 | 0 | 0 |
| 250251 | 1 | 0 | 0 | 0 | 0 |
| 250252 | 1 | 0 | 0 | 0 | 0 |
| 250253 | 1 | 0 | 0 | 0 | 0 |
| 254255 | 1 | 0 | 0 | 0 | 0 |
| 254256 | 1 | 0 | 0 | 0 | 0 |
| 254257 | 1 | 0 | 0 | 0 | 0 |
| 258259 | 1 | 0 | 0 | 0 | 0 |
| 258260 | 1 | 0 | 0 | 0 | 0 |
| 260261 | 1 | 0 | 0 | 0 | 0 |
| 260262 | 1 | 0 | 0 | 0 | 0 |
| 260263 | 1 | 0 | 0 | 0 | 0 |
| 263264 | 1 | 0 | 0 | 0 | 0 |
| 263265 | 1 | 0 | 0 | 0 | 0 |
| 263269 | 1 | 0 | 0 | 0 | 0 |
| 265266 | 1 | 0 | 0 | 0 | 0 |
| 265267 | 1 | 0 | 0 | 0 | 0 |
| 265268 | 1 | 0 | 0 | 0 | 0 |
| 268304 | 1 | 0 | 0 | 0 | 0 |
| 269270 | 1 | 0 | 0 | 0 | 0 |
| 271272 | 1 | 0 | 0 | 0 | 0 |
| 271273 | 1 | 0 | 0 | 0 | 0 |



```

271274 1 0 0 0 0
271313 1 0 0 0 0
274275 1 0 0 0 0
275276 1 0 0 0 0
275282 2 0 0 0 0
276277 1 0 0 0 0
276278 1 0 0 0 0
276279 1 0 0 0 0
279280 1 0 0 0 0
279281 1 0 0 0 0
279332 1 0 0 0 0
283284 1 0 0 0 0
283291 1 0 0 0 0
283294 1 0 0 0 0
283297 1 0 0 0 0
284285 1 0 0 0 0
284286 1 0 0 0 0
284287 1 0 0 0 0
287288 1 0 0 0 0
288289 1 0 0 0 0
288290 1 0 0 0 0
288313 1 0 0 0 0
290291 1 0 0 0 0
291292 1 0 0 0 0
291293 1 0 0 0 0
294295 1 0 0 0 0
294296 1 0 0 0 0
294311 1 0 0 0 0
297298 1 0 0 0 0
297299 1 0 0 0 0
297300 1 0 0 0 0
300301 1 0 0 0 0
300302 1 0 0 0 0
300303 1 0 0 0 0
304305 1 0 0 0 0
304306 1 0 0 0 0
304307 1 0 0 0 0
307308 1 0 0 0 0
307309 1 0 0 0 0
307310 1 0 0 0 0
310311 1 0 0 0 0
310312 2 0 0 0 0
313314 1 0 0 0 0
313318 1 0 0 0 0
314315 1 0 0 0 0
314316 1 0 0 0 0
314317 1 0 0 0 0
318319 1 0 0 0 0
318320 1 0 0 0 0
318321 1 0 0 0 0
322323 1 0 0 0 0
322324 1 0 0 0 0
324325 1 0 0 0 0
324326 1 0 0 0 0
324327 1 0 0 0 0
327328 1 0 0 0 0
327329 1 0 0 0 0
327334 1 0 0 0 0
329330 1 0 0 0 0
329331 1 0 0 0 0
329332 1 0 0 0 0
332333 1 0 0 0 0
334335 1 0 0 0 0
M END
> <NAME>
O24_12

```

```

$$$$
O28_12
MOE2012 3D

```

```

347351 0 0 1 0 0 0 0 0999 V2000
45.2690 -31.1770 6.9890 O 0 0 0 0 0 0 0 0 0 0 0 0 0 0 0
45.5090 -32.1000 7.1790 H 0 0 0 0 0 0 0 0 0 0 0 0 0 0 0
44.2890 -30.7940 7.9420 C 0 0 0 0 0 0 0 0 0 0 0 0 0 0 0
43.4250 -31.4590 7.8400 H 0 0 0 0 0 0 0 0 0 0 0 0 0 0 0
44.7120 -30.9090 8.9450 H 0 0 0 0 0 0 0 0 0 0 0 0 0 0 0
43.9000 -29.3500 7.6780 C 0 0 0 0 0 0 0 0 0 0 0 0 0 0 0
44.7920 -28.7140 7.7460 H 0 0 0 0 0 0 0 0 0 0 0 0 0 0 0
43.5430 -29.2540 6.6440 H 0 0 0 0 0 0 0 0 0 0 0 0 0 0 0
42.8300 -28.8660 8.6530 C 0 0 0 0 0 0 0 0 0 0 0 0 0 0 0

```









|         |          |         |   |   |   |   |   |   |   |   |   |   |   |   |   |
|---------|----------|---------|---|---|---|---|---|---|---|---|---|---|---|---|---|
| 40.6340 | -21.5390 | -6.9030 | C | 0 | 0 | 0 | 0 | 0 | 0 | 0 | 0 | 0 | 0 | 0 | 0 |
| 40.8380 | -21.2010 | -5.8820 | H | 0 | 0 | 0 | 0 | 0 | 0 | 0 | 0 | 0 | 0 | 0 | 0 |
| 39.5510 | -21.6290 | -7.0360 | H | 0 | 0 | 0 | 0 | 0 | 0 | 0 | 0 | 0 | 0 | 0 | 0 |
| 41.3210 | -22.8680 | -7.1760 | C | 0 | 0 | 0 | 0 | 0 | 0 | 0 | 0 | 0 | 0 | 0 | 0 |
| 41.1340 | -23.1740 | -8.2130 | H | 0 | 0 | 0 | 0 | 0 | 0 | 0 | 0 | 0 | 0 | 0 | 0 |
| 42.4070 | -22.7450 | -7.0860 | H | 0 | 0 | 0 | 0 | 0 | 0 | 0 | 0 | 0 | 0 | 0 | 0 |
| 40.8190 | -23.9330 | -6.2050 | C | 0 | 0 | 0 | 0 | 0 | 0 | 0 | 0 | 0 | 0 | 0 | 0 |
| 41.0060 | -23.5990 | -5.1760 | H | 0 | 0 | 0 | 0 | 0 | 0 | 0 | 0 | 0 | 0 | 0 | 0 |
| 39.7320 | -24.0290 | -6.3130 | H | 0 | 0 | 0 | 0 | 0 | 0 | 0 | 0 | 0 | 0 | 0 | 0 |
| 41.5000 | -25.2840 | -6.4320 | C | 0 | 0 | 0 | 0 | 0 | 0 | 0 | 0 | 0 | 0 | 0 | 0 |
| 41.3280 | -25.6600 | -7.4480 | H | 0 | 0 | 0 | 0 | 0 | 0 | 0 | 0 | 0 | 0 | 0 | 0 |
| 42.5830 | -25.1510 | -6.3220 | H | 0 | 0 | 0 | 0 | 0 | 0 | 0 | 0 | 0 | 0 | 0 | 0 |
| 41.0570 | -26.2440 | -5.4220 | N | 0 | 0 | 3 | 0 | 0 | 0 | 0 | 0 | 0 | 0 | 0 | 0 |
| 41.7630 | -26.9740 | -5.3180 | H | 0 | 0 | 0 | 0 | 0 | 0 | 0 | 0 | 0 | 0 | 0 | 0 |
| 1       | 2        | 1       | 0 | 0 | 0 | 0 | 0 | 0 | 0 | 0 | 0 | 0 | 0 | 0 | 0 |
| 1       | 3        | 1       | 0 | 0 | 0 | 0 | 0 | 0 | 0 | 0 | 0 | 0 | 0 | 0 | 0 |
| 3       | 4        | 1       | 0 | 0 | 0 | 0 | 0 | 0 | 0 | 0 | 0 | 0 | 0 | 0 | 0 |
| 3       | 5        | 1       | 0 | 0 | 0 | 0 | 0 | 0 | 0 | 0 | 0 | 0 | 0 | 0 | 0 |
| 3       | 6        | 1       | 0 | 0 | 0 | 0 | 0 | 0 | 0 | 0 | 0 | 0 | 0 | 0 | 0 |
| 6       | 7        | 1       | 0 | 0 | 0 | 0 | 0 | 0 | 0 | 0 | 0 | 0 | 0 | 0 | 0 |
| 6       | 8        | 1       | 0 | 0 | 0 | 0 | 0 | 0 | 0 | 0 | 0 | 0 | 0 | 0 | 0 |
| 6       | 9        | 1       | 0 | 0 | 0 | 0 | 0 | 0 | 0 | 0 | 0 | 0 | 0 | 0 | 0 |
| 9       | 10       | 1       | 0 | 0 | 0 | 0 | 0 | 0 | 0 | 0 | 0 | 0 | 0 | 0 | 0 |
| 9       | 11       | 1       | 0 | 0 | 0 | 0 | 0 | 0 | 0 | 0 | 0 | 0 | 0 | 0 | 0 |
| 9       | 12       | 1       | 0 | 0 | 0 | 0 | 0 | 0 | 0 | 0 | 0 | 0 | 0 | 0 | 0 |
| 12      | 13       | 1       | 0 | 0 | 0 | 0 | 0 | 0 | 0 | 0 | 0 | 0 | 0 | 0 | 0 |
| 12      | 14       | 1       | 0 | 0 | 0 | 0 | 0 | 0 | 0 | 0 | 0 | 0 | 0 | 0 | 0 |
| 12      | 15       | 1       | 0 | 0 | 0 | 0 | 0 | 0 | 0 | 0 | 0 | 0 | 0 | 0 | 0 |
| 15      | 16       | 1       | 0 | 0 | 0 | 0 | 0 | 0 | 0 | 0 | 0 | 0 | 0 | 0 | 0 |
| 15      | 50       | 1       | 0 | 0 | 0 | 0 | 0 | 0 | 0 | 0 | 0 | 0 | 0 | 0 | 0 |
| 17      | 18       | 1       | 0 | 0 | 0 | 0 | 0 | 0 | 0 | 0 | 0 | 0 | 0 | 0 | 0 |
| 17      | 19       | 1       | 0 | 0 | 0 | 0 | 0 | 0 | 0 | 0 | 0 | 0 | 0 | 0 | 0 |
| 17      | 20       | 1       | 0 | 0 | 0 | 0 | 0 | 0 | 0 | 0 | 0 | 0 | 0 | 0 | 0 |
| 17      | 59       | 1       | 0 | 0 | 0 | 0 | 0 | 0 | 0 | 0 | 0 | 0 | 0 | 0 | 0 |
| 20      | 21       | 1       | 0 | 0 | 0 | 0 | 0 | 0 | 0 | 0 | 0 | 0 | 0 | 0 | 0 |
| 21      | 22       | 1       | 0 | 0 | 0 | 0 | 0 | 0 | 0 | 0 | 0 | 0 | 0 | 0 | 0 |
| 21      | 28       | 2       | 0 | 0 | 0 | 0 | 0 | 0 | 0 | 0 | 0 | 0 | 0 | 0 | 0 |
| 22      | 23       | 1       | 0 | 0 | 0 | 0 | 0 | 0 | 0 | 0 | 0 | 0 | 0 | 0 | 0 |
| 22      | 24       | 1       | 0 | 0 | 0 | 0 | 0 | 0 | 0 | 0 | 0 | 0 | 0 | 0 | 0 |
| 22      | 25       | 1       | 0 | 0 | 0 | 0 | 0 | 0 | 0 | 0 | 0 | 0 | 0 | 0 | 0 |
| 25      | 26       | 1       | 0 | 0 | 0 | 0 | 0 | 0 | 0 | 0 | 0 | 0 | 0 | 0 | 0 |
| 25      | 27       | 1       | 0 | 0 | 0 | 0 | 0 | 0 | 0 | 0 | 0 | 0 | 0 | 0 | 0 |
| 25      | 82       | 1       | 0 | 0 | 0 | 0 | 0 | 0 | 0 | 0 | 0 | 0 | 0 | 0 | 0 |
| 29      | 30       | 1       | 0 | 0 | 0 | 0 | 0 | 0 | 0 | 0 | 0 | 0 | 0 | 0 | 0 |
| 29      | 37       | 1       | 0 | 0 | 0 | 0 | 0 | 0 | 0 | 0 | 0 | 0 | 0 | 0 | 0 |
| 29      | 40       | 1       | 0 | 0 | 0 | 0 | 0 | 0 | 0 | 0 | 0 | 0 | 0 | 0 | 0 |
| 29      | 43       | 1       | 0 | 0 | 0 | 0 | 0 | 0 | 0 | 0 | 0 | 0 | 0 | 0 | 0 |
| 30      | 31       | 1       | 0 | 0 | 0 | 0 | 0 | 0 | 0 | 0 | 0 | 0 | 0 | 0 | 0 |
| 30      | 32       | 1       | 0 | 0 | 0 | 0 | 0 | 0 | 0 | 0 | 0 | 0 | 0 | 0 | 0 |
| 30      | 33       | 1       | 0 | 0 | 0 | 0 | 0 | 0 | 0 | 0 | 0 | 0 | 0 | 0 | 0 |
| 33      | 34       | 1       | 0 | 0 | 0 | 0 | 0 | 0 | 0 | 0 | 0 | 0 | 0 | 0 | 0 |
| 34      | 35       | 1       | 0 | 0 | 0 | 0 | 0 | 0 | 0 | 0 | 0 | 0 | 0 | 0 | 0 |
| 34      | 36       | 1       | 0 | 0 | 0 | 0 | 0 | 0 | 0 | 0 | 0 | 0 | 0 | 0 | 0 |
| 34      | 59       | 1       | 0 | 0 | 0 | 0 | 0 | 0 | 0 | 0 | 0 | 0 | 0 | 0 | 0 |
| 36      | 37       | 1       | 0 | 0 | 0 | 0 | 0 | 0 | 0 | 0 | 0 | 0 | 0 | 0 | 0 |
| 37      | 38       | 1       | 0 | 0 | 0 | 0 | 0 | 0 | 0 | 0 | 0 | 0 | 0 | 0 | 0 |
| 37      | 39       | 1       | 0 | 0 | 0 | 0 | 0 | 0 | 0 | 0 | 0 | 0 | 0 | 0 | 0 |
| 40      | 41       | 1       | 0 | 0 | 0 | 0 | 0 | 0 | 0 | 0 | 0 | 0 | 0 | 0 | 0 |
| 40      | 42       | 1       | 0 | 0 | 0 | 0 | 0 | 0 | 0 | 0 | 0 | 0 | 0 | 0 | 0 |
| 40      | 57       | 1       | 0 | 0 | 0 | 0 | 0 | 0 | 0 | 0 | 0 | 0 | 0 | 0 | 0 |
| 43      | 44       | 1       | 0 | 0 | 0 | 0 | 0 | 0 | 0 | 0 | 0 | 0 | 0 | 0 | 0 |
| 43      | 45       | 1       | 0 | 0 | 0 | 0 | 0 | 0 | 0 | 0 | 0 | 0 | 0 | 0 | 0 |
| 43      | 46       | 1       | 0 | 0 | 0 | 0 | 0 | 0 | 0 | 0 | 0 | 0 | 0 | 0 | 0 |
| 46      | 47       | 1       | 0 | 0 | 0 | 0 | 0 | 0 | 0 | 0 | 0 | 0 | 0 | 0 | 0 |
| 46      | 48       | 1       | 0 | 0 | 0 | 0 | 0 | 0 | 0 | 0 | 0 | 0 | 0 | 0 | 0 |
| 46      | 49       | 1       | 0 | 0 | 0 | 0 | 0 | 0 | 0 | 0 | 0 | 0 | 0 | 0 | 0 |
| 50      | 51       | 1       | 0 | 0 | 0 | 0 | 0 | 0 | 0 | 0 | 0 | 0 | 0 | 0 | 0 |
| 50      | 52       | 1       | 0 | 0 | 0 | 0 | 0 | 0 | 0 | 0 | 0 | 0 | 0 | 0 | 0 |
| 50      | 53       | 1       | 0 | 0 | 0 | 0 | 0 | 0 | 0 | 0 | 0 | 0 | 0 | 0 | 0 |
| 53      | 54       | 1       | 0 | 0 | 0 | 0 | 0 | 0 | 0 | 0 | 0 | 0 | 0 | 0 | 0 |
| 53      | 55       | 1       | 0 | 0 | 0 | 0 | 0 | 0 | 0 | 0 | 0 | 0 | 0 | 0 | 0 |
| 53      | 56       | 1       | 0 | 0 | 0 | 0 | 0 | 0 | 0 | 0 | 0 | 0 | 0 | 0 | 0 |
| 56      | 57       | 1       | 0 | 0 | 0 | 0 | 0 | 0 | 0 | 0 | 0 | 0 | 0 | 0 | 0 |
| 56      | 58       | 2       | 0 | 0 | 0 | 0 | 0 | 0 | 0 | 0 | 0 | 0 | 0 | 0 | 0 |
| 59      | 60       | 1       | 0 | 0 | 0 | 0 | 0 | 0 | 0 | 0 | 0 | 0 | 0 | 0 | 0 |
| 59      | 64       | 1       | 0 | 0 | 0 | 0 | 0 | 0 | 0 | 0 | 0 | 0 | 0 | 0 | 0 |
| 60      | 61       | 1       | 0 | 0 | 0 | 0 | 0 | 0 | 0 | 0 | 0 | 0 | 0 | 0 | 0 |
| 60      | 62       | 1       | 0 | 0 | 0 | 0 | 0 | 0 | 0 | 0 | 0 | 0 | 0 | 0 | 0 |
| 60      | 63       | 1       | 0 | 0 | 0 | 0 | 0 | 0 | 0 | 0 | 0 | 0 | 0 | 0 | 0 |
| 64      | 65       | 1       | 0 | 0 | 0 | 0 | 0 | 0 | 0 | 0 | 0 | 0 | 0 | 0 | 0 |
| 64      | 66       | 1       | 0 | 0 | 0 | 0 | 0 | 0 | 0 | 0 | 0 | 0 | 0 | 0 | 0 |

|        |    |   |   |   |   |   |
|--------|----|---|---|---|---|---|
| 64     | 67 | 1 | 0 | 0 | 0 | 0 |
| 68     | 69 | 1 | 0 | 0 | 0 | 0 |
| 68     | 70 | 1 | 0 | 0 | 0 | 0 |
| 70     | 71 | 1 | 0 | 0 | 0 | 0 |
| 70     | 72 | 1 | 0 | 0 | 0 | 0 |
| 70     | 73 | 1 | 0 | 0 | 0 | 0 |
| 73     | 74 | 1 | 0 | 0 | 0 | 0 |
| 73     | 75 | 1 | 0 | 0 | 0 | 0 |
| 73     | 76 | 1 | 0 | 0 | 0 | 0 |
| 76     | 77 | 1 | 0 | 0 | 0 | 0 |
| 76     | 78 | 1 | 0 | 0 | 0 | 0 |
| 76     | 79 | 1 | 0 | 0 | 0 | 0 |
| 79     | 80 | 1 | 0 | 0 | 0 | 0 |
| 79     | 81 | 1 | 0 | 0 | 0 | 0 |
| 79     | 82 | 1 | 0 | 0 | 0 | 0 |
| 82116  |    | 1 | 0 | 0 | 0 | 0 |
| 83     | 84 | 1 | 0 | 0 | 0 | 0 |
| 83     | 85 | 1 | 0 | 0 | 0 | 0 |
| 83     | 86 | 1 | 0 | 0 | 0 | 0 |
| 83125  |    | 1 | 0 | 0 | 0 | 0 |
| 86     | 87 | 1 | 0 | 0 | 0 | 0 |
| 87     | 88 | 1 | 0 | 0 | 0 | 0 |
| 87     | 94 | 2 | 0 | 0 | 0 | 0 |
| 88     | 89 | 1 | 0 | 0 | 0 | 0 |
| 88     | 90 | 1 | 0 | 0 | 0 | 0 |
| 88     | 91 | 1 | 0 | 0 | 0 | 0 |
| 91     | 92 | 1 | 0 | 0 | 0 | 0 |
| 91     | 93 | 1 | 0 | 0 | 0 | 0 |
| 91148  |    | 1 | 0 | 0 | 0 | 0 |
| 95     | 96 | 1 | 0 | 0 | 0 | 0 |
| 95103  |    | 1 | 0 | 0 | 0 | 0 |
| 95106  |    | 1 | 0 | 0 | 0 | 0 |
| 95109  |    | 1 | 0 | 0 | 0 | 0 |
| 96     | 97 | 1 | 0 | 0 | 0 | 0 |
| 96     | 98 | 1 | 0 | 0 | 0 | 0 |
| 96     | 99 | 1 | 0 | 0 | 0 | 0 |
| 99100  |    | 1 | 0 | 0 | 0 | 0 |
| 100101 |    | 1 | 0 | 0 | 0 | 0 |
| 100102 |    | 1 | 0 | 0 | 0 | 0 |
| 100125 |    | 1 | 0 | 0 | 0 | 0 |
| 102103 |    | 1 | 0 | 0 | 0 | 0 |
| 103104 |    | 1 | 0 | 0 | 0 | 0 |
| 103105 |    | 1 | 0 | 0 | 0 | 0 |
| 106107 |    | 1 | 0 | 0 | 0 | 0 |
| 106108 |    | 1 | 0 | 0 | 0 | 0 |
| 106123 |    | 1 | 0 | 0 | 0 | 0 |
| 109110 |    | 1 | 0 | 0 | 0 | 0 |
| 109111 |    | 1 | 0 | 0 | 0 | 0 |
| 109112 |    | 1 | 0 | 0 | 0 | 0 |
| 112113 |    | 1 | 0 | 0 | 0 | 0 |
| 112114 |    | 1 | 0 | 0 | 0 | 0 |
| 112115 |    | 1 | 0 | 0 | 0 | 0 |
| 116117 |    | 1 | 0 | 0 | 0 | 0 |
| 116118 |    | 1 | 0 | 0 | 0 | 0 |
| 116119 |    | 1 | 0 | 0 | 0 | 0 |
| 119120 |    | 1 | 0 | 0 | 0 | 0 |
| 119121 |    | 1 | 0 | 0 | 0 | 0 |
| 119122 |    | 1 | 0 | 0 | 0 | 0 |
| 122123 |    | 1 | 0 | 0 | 0 | 0 |
| 122124 |    | 2 | 0 | 0 | 0 | 0 |
| 125126 |    | 1 | 0 | 0 | 0 | 0 |
| 125130 |    | 1 | 0 | 0 | 0 | 0 |
| 126127 |    | 1 | 0 | 0 | 0 | 0 |
| 126128 |    | 1 | 0 | 0 | 0 | 0 |
| 126129 |    | 1 | 0 | 0 | 0 | 0 |
| 130131 |    | 1 | 0 | 0 | 0 | 0 |
| 130132 |    | 1 | 0 | 0 | 0 | 0 |
| 130133 |    | 1 | 0 | 0 | 0 | 0 |
| 134135 |    | 1 | 0 | 0 | 0 | 0 |
| 134136 |    | 1 | 0 | 0 | 0 | 0 |
| 136137 |    | 1 | 0 | 0 | 0 | 0 |
| 136138 |    | 1 | 0 | 0 | 0 | 0 |
| 136139 |    | 1 | 0 | 0 | 0 | 0 |
| 139140 |    | 1 | 0 | 0 | 0 | 0 |
| 139141 |    | 1 | 0 | 0 | 0 | 0 |
| 139142 |    | 1 | 0 | 0 | 0 | 0 |
| 142143 |    | 1 | 0 | 0 | 0 | 0 |
| 142144 |    | 1 | 0 | 0 | 0 | 0 |
| 142145 |    | 1 | 0 | 0 | 0 | 0 |
| 145146 |    | 1 | 0 | 0 | 0 | 0 |
| 145147 |    | 1 | 0 | 0 | 0 | 0 |

|        |   |   |   |   |   |
|--------|---|---|---|---|---|
| 145148 | 1 | 0 | 0 | 0 | 0 |
| 148182 | 1 | 0 | 0 | 0 | 0 |
| 149150 | 1 | 0 | 0 | 0 | 0 |
| 149151 | 1 | 0 | 0 | 0 | 0 |
| 149152 | 1 | 0 | 0 | 0 | 0 |
| 149191 | 1 | 0 | 0 | 0 | 0 |
| 152153 | 1 | 0 | 0 | 0 | 0 |
| 153154 | 1 | 0 | 0 | 0 | 0 |
| 153160 | 2 | 0 | 0 | 0 | 0 |
| 154155 | 1 | 0 | 0 | 0 | 0 |
| 154156 | 1 | 0 | 0 | 0 | 0 |
| 154157 | 1 | 0 | 0 | 0 | 0 |
| 157158 | 1 | 0 | 0 | 0 | 0 |
| 157159 | 1 | 0 | 0 | 0 | 0 |
| 157214 | 1 | 0 | 0 | 0 | 0 |
| 161162 | 1 | 0 | 0 | 0 | 0 |
| 161169 | 1 | 0 | 0 | 0 | 0 |
| 161172 | 1 | 0 | 0 | 0 | 0 |
| 161175 | 1 | 0 | 0 | 0 | 0 |
| 162163 | 1 | 0 | 0 | 0 | 0 |
| 162164 | 1 | 0 | 0 | 0 | 0 |
| 162165 | 1 | 0 | 0 | 0 | 0 |
| 165166 | 1 | 0 | 0 | 0 | 0 |
| 166167 | 1 | 0 | 0 | 0 | 0 |
| 166168 | 1 | 0 | 0 | 0 | 0 |
| 166191 | 1 | 0 | 0 | 0 | 0 |
| 168169 | 1 | 0 | 0 | 0 | 0 |
| 169170 | 1 | 0 | 0 | 0 | 0 |
| 169171 | 1 | 0 | 0 | 0 | 0 |
| 172173 | 1 | 0 | 0 | 0 | 0 |
| 172174 | 1 | 0 | 0 | 0 | 0 |
| 172189 | 1 | 0 | 0 | 0 | 0 |
| 175176 | 1 | 0 | 0 | 0 | 0 |
| 175177 | 1 | 0 | 0 | 0 | 0 |
| 175178 | 1 | 0 | 0 | 0 | 0 |
| 178179 | 1 | 0 | 0 | 0 | 0 |
| 178180 | 1 | 0 | 0 | 0 | 0 |
| 178181 | 1 | 0 | 0 | 0 | 0 |
| 182183 | 1 | 0 | 0 | 0 | 0 |
| 182184 | 1 | 0 | 0 | 0 | 0 |
| 182185 | 1 | 0 | 0 | 0 | 0 |
| 185186 | 1 | 0 | 0 | 0 | 0 |
| 185187 | 1 | 0 | 0 | 0 | 0 |
| 185188 | 1 | 0 | 0 | 0 | 0 |
| 188189 | 1 | 0 | 0 | 0 | 0 |
| 188190 | 2 | 0 | 0 | 0 | 0 |
| 191192 | 1 | 0 | 0 | 0 | 0 |
| 191196 | 1 | 0 | 0 | 0 | 0 |
| 192193 | 1 | 0 | 0 | 0 | 0 |
| 192194 | 1 | 0 | 0 | 0 | 0 |
| 192195 | 1 | 0 | 0 | 0 | 0 |
| 196197 | 1 | 0 | 0 | 0 | 0 |
| 196198 | 1 | 0 | 0 | 0 | 0 |
| 196199 | 1 | 0 | 0 | 0 | 0 |
| 200201 | 1 | 0 | 0 | 0 | 0 |
| 200202 | 1 | 0 | 0 | 0 | 0 |
| 202203 | 1 | 0 | 0 | 0 | 0 |
| 202204 | 1 | 0 | 0 | 0 | 0 |
| 202205 | 1 | 0 | 0 | 0 | 0 |
| 205206 | 1 | 0 | 0 | 0 | 0 |
| 205207 | 1 | 0 | 0 | 0 | 0 |
| 205208 | 1 | 0 | 0 | 0 | 0 |
| 208209 | 1 | 0 | 0 | 0 | 0 |
| 208210 | 1 | 0 | 0 | 0 | 0 |
| 208211 | 1 | 0 | 0 | 0 | 0 |
| 211212 | 1 | 0 | 0 | 0 | 0 |
| 211213 | 1 | 0 | 0 | 0 | 0 |
| 211214 | 1 | 0 | 0 | 0 | 0 |
| 214248 | 1 | 0 | 0 | 0 | 0 |
| 215216 | 1 | 0 | 0 | 0 | 0 |
| 215217 | 1 | 0 | 0 | 0 | 0 |
| 215218 | 1 | 0 | 0 | 0 | 0 |
| 215257 | 1 | 0 | 0 | 0 | 0 |
| 218219 | 1 | 0 | 0 | 0 | 0 |
| 219220 | 1 | 0 | 0 | 0 | 0 |
| 219226 | 2 | 0 | 0 | 0 | 0 |
| 220221 | 1 | 0 | 0 | 0 | 0 |
| 220222 | 1 | 0 | 0 | 0 | 0 |
| 220223 | 1 | 0 | 0 | 0 | 0 |
| 223224 | 1 | 0 | 0 | 0 | 0 |
| 223225 | 1 | 0 | 0 | 0 | 0 |



|        |   |   |   |   |   |
|--------|---|---|---|---|---|
| 223280 | 1 | 0 | 0 | 0 | 0 |
| 227228 | 1 | 0 | 0 | 0 | 0 |
| 227235 | 1 | 0 | 0 | 0 | 0 |
| 227238 | 1 | 0 | 0 | 0 | 0 |
| 227241 | 1 | 0 | 0 | 0 | 0 |
| 228229 | 1 | 0 | 0 | 0 | 0 |
| 228230 | 1 | 0 | 0 | 0 | 0 |
| 228231 | 1 | 0 | 0 | 0 | 0 |
| 231232 | 1 | 0 | 0 | 0 | 0 |
| 232233 | 1 | 0 | 0 | 0 | 0 |
| 232234 | 1 | 0 | 0 | 0 | 0 |
| 232257 | 1 | 0 | 0 | 0 | 0 |
| 234235 | 1 | 0 | 0 | 0 | 0 |
| 235236 | 1 | 0 | 0 | 0 | 0 |
| 235237 | 1 | 0 | 0 | 0 | 0 |
| 238239 | 1 | 0 | 0 | 0 | 0 |
| 238240 | 1 | 0 | 0 | 0 | 0 |
| 238255 | 1 | 0 | 0 | 0 | 0 |
| 241242 | 1 | 0 | 0 | 0 | 0 |
| 241243 | 1 | 0 | 0 | 0 | 0 |
| 241244 | 1 | 0 | 0 | 0 | 0 |
| 244245 | 1 | 0 | 0 | 0 | 0 |
| 244246 | 1 | 0 | 0 | 0 | 0 |
| 244247 | 1 | 0 | 0 | 0 | 0 |
| 248249 | 1 | 0 | 0 | 0 | 0 |
| 248250 | 1 | 0 | 0 | 0 | 0 |
| 248251 | 1 | 0 | 0 | 0 | 0 |
| 251252 | 1 | 0 | 0 | 0 | 0 |
| 251253 | 1 | 0 | 0 | 0 | 0 |
| 251254 | 1 | 0 | 0 | 0 | 0 |
| 254255 | 1 | 0 | 0 | 0 | 0 |
| 254256 | 2 | 0 | 0 | 0 | 0 |
| 257258 | 1 | 0 | 0 | 0 | 0 |
| 257262 | 1 | 0 | 0 | 0 | 0 |
| 258259 | 1 | 0 | 0 | 0 | 0 |
| 258260 | 1 | 0 | 0 | 0 | 0 |
| 258261 | 1 | 0 | 0 | 0 | 0 |
| 262263 | 1 | 0 | 0 | 0 | 0 |
| 262264 | 1 | 0 | 0 | 0 | 0 |
| 262265 | 1 | 0 | 0 | 0 | 0 |
| 266267 | 1 | 0 | 0 | 0 | 0 |
| 266268 | 1 | 0 | 0 | 0 | 0 |
| 268269 | 1 | 0 | 0 | 0 | 0 |
| 268270 | 1 | 0 | 0 | 0 | 0 |
| 268271 | 1 | 0 | 0 | 0 | 0 |
| 271272 | 1 | 0 | 0 | 0 | 0 |
| 271273 | 1 | 0 | 0 | 0 | 0 |
| 271274 | 1 | 0 | 0 | 0 | 0 |
| 274275 | 1 | 0 | 0 | 0 | 0 |
| 274276 | 1 | 0 | 0 | 0 | 0 |
| 274277 | 1 | 0 | 0 | 0 | 0 |
| 277278 | 1 | 0 | 0 | 0 | 0 |
| 277279 | 1 | 0 | 0 | 0 | 0 |
| 277280 | 1 | 0 | 0 | 0 | 0 |
| 280314 | 1 | 0 | 0 | 0 | 0 |
| 281282 | 1 | 0 | 0 | 0 | 0 |
| 281283 | 1 | 0 | 0 | 0 | 0 |
| 281284 | 1 | 0 | 0 | 0 | 0 |
| 281323 | 1 | 0 | 0 | 0 | 0 |
| 284285 | 1 | 0 | 0 | 0 | 0 |
| 285286 | 1 | 0 | 0 | 0 | 0 |
| 285292 | 2 | 0 | 0 | 0 | 0 |
| 286287 | 1 | 0 | 0 | 0 | 0 |
| 286288 | 1 | 0 | 0 | 0 | 0 |
| 286289 | 1 | 0 | 0 | 0 | 0 |
| 289290 | 1 | 0 | 0 | 0 | 0 |
| 289291 | 1 | 0 | 0 | 0 | 0 |
| 289346 | 1 | 0 | 0 | 0 | 0 |
| 293294 | 1 | 0 | 0 | 0 | 0 |
| 293301 | 1 | 0 | 0 | 0 | 0 |
| 293304 | 1 | 0 | 0 | 0 | 0 |
| 293307 | 1 | 0 | 0 | 0 | 0 |
| 294295 | 1 | 0 | 0 | 0 | 0 |
| 294296 | 1 | 0 | 0 | 0 | 0 |
| 294297 | 1 | 0 | 0 | 0 | 0 |
| 297298 | 1 | 0 | 0 | 0 | 0 |
| 298299 | 1 | 0 | 0 | 0 | 0 |
| 298300 | 1 | 0 | 0 | 0 | 0 |
| 298323 | 1 | 0 | 0 | 0 | 0 |
| 300301 | 1 | 0 | 0 | 0 | 0 |
| 301302 | 1 | 0 | 0 | 0 | 0 |











|     |     |   |   |   |   |   |
|-----|-----|---|---|---|---|---|
| 23  | 25  | 1 | 0 | 0 | 0 | 0 |
| 23  | 77  | 1 | 0 | 0 | 0 | 0 |
| 27  | 28  | 1 | 0 | 0 | 0 | 0 |
| 27  | 29  | 1 | 0 | 0 | 0 | 0 |
| 27  | 37  | 1 | 0 | 0 | 0 | 0 |
| 27  | 39  | 1 | 0 | 0 | 0 | 0 |
| 30  | 31  | 1 | 0 | 0 | 0 | 0 |
| 30  | 32  | 1 | 0 | 0 | 0 | 0 |
| 30  | 33  | 1 | 0 | 0 | 0 | 0 |
| 33  | 34  | 1 | 0 | 0 | 0 | 0 |
| 33  | 35  | 1 | 0 | 0 | 0 | 0 |
| 33  | 36  | 1 | 0 | 0 | 0 | 0 |
| 36  | 37  | 1 | 0 | 0 | 0 | 0 |
| 36  | 38  | 2 | 0 | 0 | 0 | 0 |
| 39  | 40  | 1 | 0 | 0 | 0 | 0 |
| 39  | 41  | 1 | 0 | 0 | 0 | 0 |
| 39  | 42  | 1 | 0 | 0 | 0 | 0 |
| 42  | 43  | 1 | 0 | 0 | 0 | 0 |
| 43  | 44  | 1 | 0 | 0 | 0 | 0 |
| 43  | 45  | 1 | 0 | 0 | 0 | 0 |
| 43  | 46  | 1 | 0 | 0 | 0 | 0 |
| 46  | 47  | 1 | 0 | 0 | 0 | 0 |
| 46  | 48  | 1 | 0 | 0 | 0 | 0 |
| 46  | 49  | 1 | 0 | 0 | 0 | 0 |
| 49  | 50  | 1 | 0 | 0 | 0 | 0 |
| 49  | 51  | 1 | 0 | 0 | 0 | 0 |
| 49  | 52  | 1 | 0 | 0 | 0 | 0 |
| 52  | 53  | 1 | 0 | 0 | 0 | 0 |
| 52  | 54  | 1 | 0 | 0 | 0 | 0 |
| 52  | 55  | 1 | 0 | 0 | 0 | 0 |
| 55  | 56  | 1 | 0 | 0 | 0 | 0 |
| 55  | 57  | 1 | 0 | 0 | 0 | 0 |
| 55  | 58  | 1 | 0 | 0 | 0 | 0 |
| 58  | 59  | 1 | 0 | 0 | 0 | 0 |
| 58  | 60  | 1 | 0 | 0 | 0 | 0 |
| 58  | 61  | 1 | 0 | 0 | 0 | 0 |
| 61  | 62  | 1 | 0 | 0 | 0 | 0 |
| 62  | 63  | 1 | 0 | 0 | 0 | 0 |
| 62  | 64  | 1 | 0 | 0 | 0 | 0 |
| 65  | 66  | 1 | 0 | 0 | 0 | 0 |
| 65  | 67  | 1 | 0 | 0 | 0 | 0 |
| 67  | 68  | 1 | 0 | 0 | 0 | 0 |
| 67  | 69  | 1 | 0 | 0 | 0 | 0 |
| 67  | 70  | 1 | 0 | 0 | 0 | 0 |
| 70  | 71  | 1 | 0 | 0 | 0 | 0 |
| 70  | 72  | 1 | 0 | 0 | 0 | 0 |
| 70  | 77  | 1 | 0 | 0 | 0 | 0 |
| 72  | 73  | 1 | 0 | 0 | 0 | 0 |
| 72  | 74  | 1 | 0 | 0 | 0 | 0 |
| 72  | 75  | 1 | 0 | 0 | 0 | 0 |
| 75  | 76  | 1 | 0 | 0 | 0 | 0 |
| 77  | 93  | 1 | 0 | 0 | 0 | 0 |
| 78  | 79  | 1 | 0 | 0 | 0 | 0 |
| 78  | 80  | 1 | 0 | 0 | 0 | 0 |
| 78  | 81  | 1 | 0 | 0 | 0 | 0 |
| 78  | 125 | 1 | 0 | 0 | 0 | 0 |
| 81  | 82  | 1 | 0 | 0 | 0 | 0 |
| 82  | 83  | 1 | 0 | 0 | 0 | 0 |
| 82  | 89  | 2 | 0 | 0 | 0 | 0 |
| 83  | 84  | 1 | 0 | 0 | 0 | 0 |
| 83  | 85  | 1 | 0 | 0 | 0 | 0 |
| 83  | 86  | 1 | 0 | 0 | 0 | 0 |
| 86  | 87  | 1 | 0 | 0 | 0 | 0 |
| 86  | 88  | 1 | 0 | 0 | 0 | 0 |
| 86  | 140 | 1 | 0 | 0 | 0 | 0 |
| 90  | 91  | 1 | 0 | 0 | 0 | 0 |
| 90  | 92  | 1 | 0 | 0 | 0 | 0 |
| 90  | 100 | 1 | 0 | 0 | 0 | 0 |
| 90  | 102 | 1 | 0 | 0 | 0 | 0 |
| 93  | 94  | 1 | 0 | 0 | 0 | 0 |
| 93  | 95  | 1 | 0 | 0 | 0 | 0 |
| 93  | 96  | 1 | 0 | 0 | 0 | 0 |
| 96  | 97  | 1 | 0 | 0 | 0 | 0 |
| 96  | 98  | 1 | 0 | 0 | 0 | 0 |
| 96  | 99  | 1 | 0 | 0 | 0 | 0 |
| 99  | 100 | 1 | 0 | 0 | 0 | 0 |
| 99  | 101 | 2 | 0 | 0 | 0 | 0 |
| 102 | 103 | 1 | 0 | 0 | 0 | 0 |
| 102 | 104 | 1 | 0 | 0 | 0 | 0 |
| 102 | 105 | 1 | 0 | 0 | 0 | 0 |
| 105 | 106 | 1 | 0 | 0 | 0 | 0 |

|        |   |   |   |   |   |
|--------|---|---|---|---|---|
| 106107 | 1 | 0 | 0 | 0 | 0 |
| 106108 | 1 | 0 | 0 | 0 | 0 |
| 106109 | 1 | 0 | 0 | 0 | 0 |
| 109110 | 1 | 0 | 0 | 0 | 0 |
| 109111 | 1 | 0 | 0 | 0 | 0 |
| 109112 | 1 | 0 | 0 | 0 | 0 |
| 112113 | 1 | 0 | 0 | 0 | 0 |
| 112114 | 1 | 0 | 0 | 0 | 0 |
| 112115 | 1 | 0 | 0 | 0 | 0 |
| 115116 | 1 | 0 | 0 | 0 | 0 |
| 115117 | 1 | 0 | 0 | 0 | 0 |
| 115118 | 1 | 0 | 0 | 0 | 0 |
| 118119 | 1 | 0 | 0 | 0 | 0 |
| 118120 | 1 | 0 | 0 | 0 | 0 |
| 118121 | 1 | 0 | 0 | 0 | 0 |
| 121122 | 1 | 0 | 0 | 0 | 0 |
| 121123 | 1 | 0 | 0 | 0 | 0 |
| 121124 | 1 | 0 | 0 | 0 | 0 |
| 124125 | 1 | 0 | 0 | 0 | 0 |
| 125126 | 1 | 0 | 0 | 0 | 0 |
| 125127 | 1 | 0 | 0 | 0 | 0 |
| 128129 | 1 | 0 | 0 | 0 | 0 |
| 128130 | 1 | 0 | 0 | 0 | 0 |
| 130131 | 1 | 0 | 0 | 0 | 0 |
| 130132 | 1 | 0 | 0 | 0 | 0 |
| 130133 | 1 | 0 | 0 | 0 | 0 |
| 133134 | 1 | 0 | 0 | 0 | 0 |
| 133135 | 1 | 0 | 0 | 0 | 0 |
| 133140 | 1 | 0 | 0 | 0 | 0 |
| 135136 | 1 | 0 | 0 | 0 | 0 |
| 135137 | 1 | 0 | 0 | 0 | 0 |
| 135138 | 1 | 0 | 0 | 0 | 0 |
| 138139 | 1 | 0 | 0 | 0 | 0 |
| 140156 | 1 | 0 | 0 | 0 | 0 |
| 141142 | 1 | 0 | 0 | 0 | 0 |
| 141143 | 1 | 0 | 0 | 0 | 0 |
| 141144 | 1 | 0 | 0 | 0 | 0 |
| 141188 | 1 | 0 | 0 | 0 | 0 |
| 144145 | 1 | 0 | 0 | 0 | 0 |
| 145146 | 1 | 0 | 0 | 0 | 0 |
| 145152 | 2 | 0 | 0 | 0 | 0 |
| 146147 | 1 | 0 | 0 | 0 | 0 |
| 146148 | 1 | 0 | 0 | 0 | 0 |
| 146149 | 1 | 0 | 0 | 0 | 0 |
| 149150 | 1 | 0 | 0 | 0 | 0 |
| 149151 | 1 | 0 | 0 | 0 | 0 |
| 149203 | 1 | 0 | 0 | 0 | 0 |
| 153154 | 1 | 0 | 0 | 0 | 0 |
| 153155 | 1 | 0 | 0 | 0 | 0 |
| 153163 | 1 | 0 | 0 | 0 | 0 |
| 153165 | 1 | 0 | 0 | 0 | 0 |
| 156157 | 1 | 0 | 0 | 0 | 0 |
| 156158 | 1 | 0 | 0 | 0 | 0 |
| 156159 | 1 | 0 | 0 | 0 | 0 |
| 159160 | 1 | 0 | 0 | 0 | 0 |
| 159161 | 1 | 0 | 0 | 0 | 0 |
| 159162 | 1 | 0 | 0 | 0 | 0 |
| 162163 | 1 | 0 | 0 | 0 | 0 |
| 162164 | 2 | 0 | 0 | 0 | 0 |
| 165166 | 1 | 0 | 0 | 0 | 0 |
| 165167 | 1 | 0 | 0 | 0 | 0 |
| 165168 | 1 | 0 | 0 | 0 | 0 |
| 168169 | 1 | 0 | 0 | 0 | 0 |
| 169170 | 1 | 0 | 0 | 0 | 0 |
| 169171 | 1 | 0 | 0 | 0 | 0 |
| 169172 | 1 | 0 | 0 | 0 | 0 |
| 172173 | 1 | 0 | 0 | 0 | 0 |
| 172174 | 1 | 0 | 0 | 0 | 0 |
| 172175 | 1 | 0 | 0 | 0 | 0 |
| 175176 | 1 | 0 | 0 | 0 | 0 |
| 175177 | 1 | 0 | 0 | 0 | 0 |
| 175178 | 1 | 0 | 0 | 0 | 0 |
| 178179 | 1 | 0 | 0 | 0 | 0 |
| 178180 | 1 | 0 | 0 | 0 | 0 |
| 178181 | 1 | 0 | 0 | 0 | 0 |
| 181182 | 1 | 0 | 0 | 0 | 0 |
| 181183 | 1 | 0 | 0 | 0 | 0 |
| 181184 | 1 | 0 | 0 | 0 | 0 |
| 184185 | 1 | 0 | 0 | 0 | 0 |
| 184186 | 1 | 0 | 0 | 0 | 0 |
| 184187 | 1 | 0 | 0 | 0 | 0 |



|        |   |   |   |   |   |
|--------|---|---|---|---|---|
| 187188 | 1 | 0 | 0 | 0 | 0 |
| 188189 | 1 | 0 | 0 | 0 | 0 |
| 188190 | 1 | 0 | 0 | 0 | 0 |
| 191192 | 1 | 0 | 0 | 0 | 0 |
| 191193 | 1 | 0 | 0 | 0 | 0 |
| 193194 | 1 | 0 | 0 | 0 | 0 |
| 193195 | 1 | 0 | 0 | 0 | 0 |
| 193196 | 1 | 0 | 0 | 0 | 0 |
| 196197 | 1 | 0 | 0 | 0 | 0 |
| 196198 | 1 | 0 | 0 | 0 | 0 |
| 196203 | 1 | 0 | 0 | 0 | 0 |
| 198199 | 1 | 0 | 0 | 0 | 0 |
| 198200 | 1 | 0 | 0 | 0 | 0 |
| 198201 | 1 | 0 | 0 | 0 | 0 |
| 201202 | 1 | 0 | 0 | 0 | 0 |
| 203219 | 1 | 0 | 0 | 0 | 0 |
| 204205 | 1 | 0 | 0 | 0 | 0 |
| 204206 | 1 | 0 | 0 | 0 | 0 |
| 204207 | 1 | 0 | 0 | 0 | 0 |
| 204251 | 1 | 0 | 0 | 0 | 0 |
| 207208 | 1 | 0 | 0 | 0 | 0 |
| 208209 | 1 | 0 | 0 | 0 | 0 |
| 208215 | 2 | 0 | 0 | 0 | 0 |
| 209210 | 1 | 0 | 0 | 0 | 0 |
| 209211 | 1 | 0 | 0 | 0 | 0 |
| 209212 | 1 | 0 | 0 | 0 | 0 |
| 212213 | 1 | 0 | 0 | 0 | 0 |
| 212214 | 1 | 0 | 0 | 0 | 0 |
| 212266 | 1 | 0 | 0 | 0 | 0 |
| 216217 | 1 | 0 | 0 | 0 | 0 |
| 216218 | 1 | 0 | 0 | 0 | 0 |
| 216226 | 1 | 0 | 0 | 0 | 0 |
| 216228 | 1 | 0 | 0 | 0 | 0 |
| 219220 | 1 | 0 | 0 | 0 | 0 |
| 219221 | 1 | 0 | 0 | 0 | 0 |
| 219222 | 1 | 0 | 0 | 0 | 0 |
| 222223 | 1 | 0 | 0 | 0 | 0 |
| 222224 | 1 | 0 | 0 | 0 | 0 |
| 222225 | 1 | 0 | 0 | 0 | 0 |
| 225226 | 1 | 0 | 0 | 0 | 0 |
| 225227 | 2 | 0 | 0 | 0 | 0 |
| 228229 | 1 | 0 | 0 | 0 | 0 |
| 228230 | 1 | 0 | 0 | 0 | 0 |
| 228231 | 1 | 0 | 0 | 0 | 0 |
| 231232 | 1 | 0 | 0 | 0 | 0 |
| 232233 | 1 | 0 | 0 | 0 | 0 |
| 232234 | 1 | 0 | 0 | 0 | 0 |
| 232235 | 1 | 0 | 0 | 0 | 0 |
| 235236 | 1 | 0 | 0 | 0 | 0 |
| 235237 | 1 | 0 | 0 | 0 | 0 |
| 235238 | 1 | 0 | 0 | 0 | 0 |
| 238239 | 1 | 0 | 0 | 0 | 0 |
| 238240 | 1 | 0 | 0 | 0 | 0 |
| 238241 | 1 | 0 | 0 | 0 | 0 |
| 241242 | 1 | 0 | 0 | 0 | 0 |
| 241243 | 1 | 0 | 0 | 0 | 0 |
| 241244 | 1 | 0 | 0 | 0 | 0 |
| 244245 | 1 | 0 | 0 | 0 | 0 |
| 244246 | 1 | 0 | 0 | 0 | 0 |
| 244247 | 1 | 0 | 0 | 0 | 0 |
| 247248 | 1 | 0 | 0 | 0 | 0 |
| 247249 | 1 | 0 | 0 | 0 | 0 |
| 247250 | 1 | 0 | 0 | 0 | 0 |
| 250251 | 1 | 0 | 0 | 0 | 0 |
| 251252 | 1 | 0 | 0 | 0 | 0 |
| 251253 | 1 | 0 | 0 | 0 | 0 |
| 254255 | 1 | 0 | 0 | 0 | 0 |
| 254256 | 1 | 0 | 0 | 0 | 0 |
| 256257 | 1 | 0 | 0 | 0 | 0 |
| 256258 | 1 | 0 | 0 | 0 | 0 |
| 256259 | 1 | 0 | 0 | 0 | 0 |
| 259260 | 1 | 0 | 0 | 0 | 0 |
| 259261 | 1 | 0 | 0 | 0 | 0 |
| 259266 | 1 | 0 | 0 | 0 | 0 |
| 261262 | 1 | 0 | 0 | 0 | 0 |
| 261263 | 1 | 0 | 0 | 0 | 0 |
| 261264 | 1 | 0 | 0 | 0 | 0 |
| 264265 | 1 | 0 | 0 | 0 | 0 |
| 266282 | 1 | 0 | 0 | 0 | 0 |
| 267268 | 1 | 0 | 0 | 0 | 0 |
| 267269 | 1 | 0 | 0 | 0 | 0 |

267270 1 0 0 0 0  
 267314 1 0 0 0 0  
 270271 1 0 0 0 0  
 271272 1 0 0 0 0  
 271278 2 0 0 0 0  
 272273 1 0 0 0 0  
 272274 1 0 0 0 0  
 272275 1 0 0 0 0  
 275276 1 0 0 0 0  
 275277 1 0 0 0 0  
 275329 1 0 0 0 0  
 279280 1 0 0 0 0  
 279281 1 0 0 0 0  
 279289 1 0 0 0 0  
 279291 1 0 0 0 0  
 282283 1 0 0 0 0  
 282284 1 0 0 0 0  
 282285 1 0 0 0 0  
 285286 1 0 0 0 0  
 285287 1 0 0 0 0  
 285288 1 0 0 0 0  
 288289 1 0 0 0 0  
 288290 2 0 0 0 0  
 291292 1 0 0 0 0  
 291293 1 0 0 0 0  
 291294 1 0 0 0 0  
 294295 1 0 0 0 0  
 295296 1 0 0 0 0  
 295297 1 0 0 0 0  
 295298 1 0 0 0 0  
 298299 1 0 0 0 0  
 298300 1 0 0 0 0  
 298301 1 0 0 0 0  
 301302 1 0 0 0 0  
 301303 1 0 0 0 0  
 301304 1 0 0 0 0  
 304305 1 0 0 0 0  
 304306 1 0 0 0 0  
 304307 1 0 0 0 0  
 307308 1 0 0 0 0  
 307309 1 0 0 0 0  
 307310 1 0 0 0 0  
 310311 1 0 0 0 0  
 310312 1 0 0 0 0  
 310313 1 0 0 0 0  
 313314 1 0 0 0 0  
 314315 1 0 0 0 0  
 314316 1 0 0 0 0  
 317318 1 0 0 0 0  
 317319 1 0 0 0 0  
 319320 1 0 0 0 0  
 319321 1 0 0 0 0  
 319322 1 0 0 0 0  
 322323 1 0 0 0 0  
 322324 1 0 0 0 0  
 322329 1 0 0 0 0  
 324325 1 0 0 0 0  
 324326 1 0 0 0 0  
 324327 1 0 0 0 0  
 327328 1 0 0 0 0  
 329330 1 0 0 0 0

M END  
 > <NAME>  
 U25\_12

\$\$\$  
 U28\_12  
 MOE2012 3D

| 342341  | 0       | 0      | 1 | 0 | 0 | 0 | 0 | 0999 | V2000 |   |   |   |   |   |   |   |   |   |   |   |
|---------|---------|--------|---|---|---|---|---|------|-------|---|---|---|---|---|---|---|---|---|---|---|
| 16.0450 | 17.1940 | 7.9820 | O | 0 | 0 | 0 | 0 | 0    | 0     | 0 | 0 | 0 | 0 | 0 | 0 | 0 | 0 | 0 | 0 | 0 |
| 15.7580 | 16.8720 | 8.8540 | H | 0 | 0 | 0 | 0 | 0    | 0     | 0 | 0 | 0 | 0 | 0 | 0 | 0 | 0 | 0 | 0 | 0 |
| 17.4600 | 17.3100 | 8.0250 | C | 0 | 0 | 0 | 0 | 0    | 0     | 0 | 0 | 0 | 0 | 0 | 0 | 0 | 0 | 0 | 0 | 0 |
| 17.7270 | 18.0200 | 8.8140 | H | 0 | 0 | 0 | 0 | 0    | 0     | 0 | 0 | 0 | 0 | 0 | 0 | 0 | 0 | 0 | 0 | 0 |
| 17.8830 | 16.3300 | 8.2670 | H | 0 | 0 | 0 | 0 | 0    | 0     | 0 | 0 | 0 | 0 | 0 | 0 | 0 | 0 | 0 | 0 | 0 |
| 17.9510 | 17.7940 | 6.6680 | C | 0 | 0 | 0 | 0 | 0    | 0     | 0 | 0 | 0 | 0 | 0 | 0 | 0 | 0 | 0 | 0 | 0 |
| 17.6290 | 17.0890 | 5.8920 | H | 0 | 0 | 0 | 0 | 0    | 0     | 0 | 0 | 0 | 0 | 0 | 0 | 0 | 0 | 0 | 0 | 0 |
| 17.4670 | 18.7490 | 6.4250 | H | 0 | 0 | 0 | 0 | 0    | 0     | 0 | 0 | 0 | 0 | 0 | 0 | 0 | 0 | 0 | 0 | 0 |
| 19.4710 | 17.9500 | 6.6450 | C | 0 | 0 | 0 | 0 | 0    | 0     | 0 | 0 | 0 | 0 | 0 | 0 | 0 | 0 | 0 | 0 | 0 |
| 19.7750 | 18.6670 | 7.4180 | H | 0 | 0 | 0 | 0 | 0    | 0     | 0 | 0 | 0 | 0 | 0 | 0 | 0 | 0 | 0 | 0 | 0 |
| 19.9310 | 16.9880 | 6.8970 | H | 0 | 0 | 0 | 0 | 0    | 0     | 0 | 0 | 0 | 0 | 0 | 0 | 0 | 0 | 0 | 0 | 0 |









|         |          |         |   |   |   |   |   |   |   |   |   |   |   |   |   |
|---------|----------|---------|---|---|---|---|---|---|---|---|---|---|---|---|---|
| 55.9380 | -19.9140 | 19.3790 | H | 0 | 0 | 0 | 0 | 0 | 0 | 0 | 0 | 0 | 0 | 0 | 0 |
| 54.3850 | -20.4730 | 20.0040 | H | 0 | 0 | 0 | 0 | 0 | 0 | 0 | 0 | 0 | 0 | 0 | 0 |
| 56.1100 | -21.2300 | 21.0880 | C | 0 | 0 | 0 | 0 | 0 | 0 | 0 | 0 | 0 | 0 | 0 | 0 |
| 55.5960 | -22.0920 | 21.5300 | H | 0 | 0 | 0 | 0 | 0 | 0 | 0 | 0 | 0 | 0 | 0 | 0 |
| 57.1220 | -21.5690 | 20.8350 | H | 0 | 0 | 0 | 0 | 0 | 0 | 0 | 0 | 0 | 0 | 0 | 0 |
| 56.2450 | -20.1490 | 22.0690 | N | 0 | 0 | 3 | 0 | 0 | 0 | 0 | 0 | 0 | 0 | 0 | 0 |
| 56.9230 | -20.4390 | 22.7750 | H | 0 | 0 | 0 | 0 | 0 | 0 | 0 | 0 | 0 | 0 | 0 | 0 |
| 1       | 2        | 1       | 0 | 0 | 0 | 0 | 0 | 0 | 0 | 0 | 0 | 0 | 0 | 0 | 0 |
| 1       | 3        | 1       | 0 | 0 | 0 | 0 | 0 | 0 | 0 | 0 | 0 | 0 | 0 | 0 | 0 |
| 3       | 4        | 1       | 0 | 0 | 0 | 0 | 0 | 0 | 0 | 0 | 0 | 0 | 0 | 0 | 0 |
| 3       | 5        | 1       | 0 | 0 | 0 | 0 | 0 | 0 | 0 | 0 | 0 | 0 | 0 | 0 | 0 |
| 3       | 6        | 1       | 0 | 0 | 0 | 0 | 0 | 0 | 0 | 0 | 0 | 0 | 0 | 0 | 0 |
| 6       | 7        | 1       | 0 | 0 | 0 | 0 | 0 | 0 | 0 | 0 | 0 | 0 | 0 | 0 | 0 |
| 6       | 8        | 1       | 0 | 0 | 0 | 0 | 0 | 0 | 0 | 0 | 0 | 0 | 0 | 0 | 0 |
| 6       | 9        | 1       | 0 | 0 | 0 | 0 | 0 | 0 | 0 | 0 | 0 | 0 | 0 | 0 | 0 |
| 9       | 10       | 1       | 0 | 0 | 0 | 0 | 0 | 0 | 0 | 0 | 0 | 0 | 0 | 0 | 0 |
| 9       | 11       | 1       | 0 | 0 | 0 | 0 | 0 | 0 | 0 | 0 | 0 | 0 | 0 | 0 | 0 |
| 9       | 12       | 1       | 0 | 0 | 0 | 0 | 0 | 0 | 0 | 0 | 0 | 0 | 0 | 0 | 0 |
| 12      | 13       | 1       | 0 | 0 | 0 | 0 | 0 | 0 | 0 | 0 | 0 | 0 | 0 | 0 | 0 |
| 12      | 14       | 1       | 0 | 0 | 0 | 0 | 0 | 0 | 0 | 0 | 0 | 0 | 0 | 0 | 0 |
| 12      | 15       | 1       | 0 | 0 | 0 | 0 | 0 | 0 | 0 | 0 | 0 | 0 | 0 | 0 | 0 |
| 15      | 16       | 1       | 0 | 0 | 0 | 0 | 0 | 0 | 0 | 0 | 0 | 0 | 0 | 0 | 0 |
| 15      | 32       | 1       | 0 | 0 | 0 | 0 | 0 | 0 | 0 | 0 | 0 | 0 | 0 | 0 | 0 |
| 17      | 18       | 1       | 0 | 0 | 0 | 0 | 0 | 0 | 0 | 0 | 0 | 0 | 0 | 0 | 0 |
| 17      | 19       | 1       | 0 | 0 | 0 | 0 | 0 | 0 | 0 | 0 | 0 | 0 | 0 | 0 | 0 |
| 17      | 20       | 1       | 0 | 0 | 0 | 0 | 0 | 0 | 0 | 0 | 0 | 0 | 0 | 0 | 0 |
| 17      | 64       | 1       | 0 | 0 | 0 | 0 | 0 | 0 | 0 | 0 | 0 | 0 | 0 | 0 | 0 |
| 20      | 21       | 1       | 0 | 0 | 0 | 0 | 0 | 0 | 0 | 0 | 0 | 0 | 0 | 0 | 0 |
| 21      | 22       | 1       | 0 | 0 | 0 | 0 | 0 | 0 | 0 | 0 | 0 | 0 | 0 | 0 | 0 |
| 21      | 28       | 2       | 0 | 0 | 0 | 0 | 0 | 0 | 0 | 0 | 0 | 0 | 0 | 0 | 0 |
| 22      | 23       | 1       | 0 | 0 | 0 | 0 | 0 | 0 | 0 | 0 | 0 | 0 | 0 | 0 | 0 |
| 22      | 24       | 1       | 0 | 0 | 0 | 0 | 0 | 0 | 0 | 0 | 0 | 0 | 0 | 0 | 0 |
| 22      | 25       | 1       | 0 | 0 | 0 | 0 | 0 | 0 | 0 | 0 | 0 | 0 | 0 | 0 | 0 |
| 25      | 26       | 1       | 0 | 0 | 0 | 0 | 0 | 0 | 0 | 0 | 0 | 0 | 0 | 0 | 0 |
| 25      | 27       | 1       | 0 | 0 | 0 | 0 | 0 | 0 | 0 | 0 | 0 | 0 | 0 | 0 | 0 |
| 25      | 81       | 1       | 0 | 0 | 0 | 0 | 0 | 0 | 0 | 0 | 0 | 0 | 0 | 0 | 0 |
| 29      | 30       | 1       | 0 | 0 | 0 | 0 | 0 | 0 | 0 | 0 | 0 | 0 | 0 | 0 | 0 |
| 29      | 31       | 1       | 0 | 0 | 0 | 0 | 0 | 0 | 0 | 0 | 0 | 0 | 0 | 0 | 0 |
| 29      | 39       | 1       | 0 | 0 | 0 | 0 | 0 | 0 | 0 | 0 | 0 | 0 | 0 | 0 | 0 |
| 29      | 41       | 1       | 0 | 0 | 0 | 0 | 0 | 0 | 0 | 0 | 0 | 0 | 0 | 0 | 0 |
| 32      | 33       | 1       | 0 | 0 | 0 | 0 | 0 | 0 | 0 | 0 | 0 | 0 | 0 | 0 | 0 |
| 32      | 34       | 1       | 0 | 0 | 0 | 0 | 0 | 0 | 0 | 0 | 0 | 0 | 0 | 0 | 0 |
| 32      | 35       | 1       | 0 | 0 | 0 | 0 | 0 | 0 | 0 | 0 | 0 | 0 | 0 | 0 | 0 |
| 35      | 36       | 1       | 0 | 0 | 0 | 0 | 0 | 0 | 0 | 0 | 0 | 0 | 0 | 0 | 0 |
| 35      | 37       | 1       | 0 | 0 | 0 | 0 | 0 | 0 | 0 | 0 | 0 | 0 | 0 | 0 | 0 |
| 35      | 38       | 1       | 0 | 0 | 0 | 0 | 0 | 0 | 0 | 0 | 0 | 0 | 0 | 0 | 0 |
| 38      | 39       | 1       | 0 | 0 | 0 | 0 | 0 | 0 | 0 | 0 | 0 | 0 | 0 | 0 | 0 |
| 38      | 40       | 2       | 0 | 0 | 0 | 0 | 0 | 0 | 0 | 0 | 0 | 0 | 0 | 0 | 0 |
| 41      | 42       | 1       | 0 | 0 | 0 | 0 | 0 | 0 | 0 | 0 | 0 | 0 | 0 | 0 | 0 |
| 41      | 43       | 1       | 0 | 0 | 0 | 0 | 0 | 0 | 0 | 0 | 0 | 0 | 0 | 0 | 0 |
| 41      | 44       | 1       | 0 | 0 | 0 | 0 | 0 | 0 | 0 | 0 | 0 | 0 | 0 | 0 | 0 |
| 44      | 45       | 1       | 0 | 0 | 0 | 0 | 0 | 0 | 0 | 0 | 0 | 0 | 0 | 0 | 0 |
| 45      | 46       | 1       | 0 | 0 | 0 | 0 | 0 | 0 | 0 | 0 | 0 | 0 | 0 | 0 | 0 |
| 45      | 47       | 1       | 0 | 0 | 0 | 0 | 0 | 0 | 0 | 0 | 0 | 0 | 0 | 0 | 0 |
| 45      | 48       | 1       | 0 | 0 | 0 | 0 | 0 | 0 | 0 | 0 | 0 | 0 | 0 | 0 | 0 |
| 48      | 49       | 1       | 0 | 0 | 0 | 0 | 0 | 0 | 0 | 0 | 0 | 0 | 0 | 0 | 0 |
| 48      | 50       | 1       | 0 | 0 | 0 | 0 | 0 | 0 | 0 | 0 | 0 | 0 | 0 | 0 | 0 |
| 48      | 51       | 1       | 0 | 0 | 0 | 0 | 0 | 0 | 0 | 0 | 0 | 0 | 0 | 0 | 0 |
| 51      | 52       | 1       | 0 | 0 | 0 | 0 | 0 | 0 | 0 | 0 | 0 | 0 | 0 | 0 | 0 |
| 51      | 53       | 1       | 0 | 0 | 0 | 0 | 0 | 0 | 0 | 0 | 0 | 0 | 0 | 0 | 0 |
| 51      | 54       | 1       | 0 | 0 | 0 | 0 | 0 | 0 | 0 | 0 | 0 | 0 | 0 | 0 | 0 |
| 54      | 55       | 1       | 0 | 0 | 0 | 0 | 0 | 0 | 0 | 0 | 0 | 0 | 0 | 0 | 0 |
| 54      | 56       | 1       | 0 | 0 | 0 | 0 | 0 | 0 | 0 | 0 | 0 | 0 | 0 | 0 | 0 |
| 54      | 57       | 1       | 0 | 0 | 0 | 0 | 0 | 0 | 0 | 0 | 0 | 0 | 0 | 0 | 0 |
| 57      | 58       | 1       | 0 | 0 | 0 | 0 | 0 | 0 | 0 | 0 | 0 | 0 | 0 | 0 | 0 |
| 57      | 59       | 1       | 0 | 0 | 0 | 0 | 0 | 0 | 0 | 0 | 0 | 0 | 0 | 0 | 0 |
| 57      | 60       | 1       | 0 | 0 | 0 | 0 | 0 | 0 | 0 | 0 | 0 | 0 | 0 | 0 | 0 |
| 60      | 61       | 1       | 0 | 0 | 0 | 0 | 0 | 0 | 0 | 0 | 0 | 0 | 0 | 0 | 0 |
| 60      | 62       | 1       | 0 | 0 | 0 | 0 | 0 | 0 | 0 | 0 | 0 | 0 | 0 | 0 | 0 |
| 60      | 63       | 1       | 0 | 0 | 0 | 0 | 0 | 0 | 0 | 0 | 0 | 0 | 0 | 0 | 0 |
| 63      | 64       | 1       | 0 | 0 | 0 | 0 | 0 | 0 | 0 | 0 | 0 | 0 | 0 | 0 | 0 |
| 64      | 65       | 1       | 0 | 0 | 0 | 0 | 0 | 0 | 0 | 0 | 0 | 0 | 0 | 0 | 0 |
| 64      | 66       | 1       | 0 | 0 | 0 | 0 | 0 | 0 | 0 | 0 | 0 | 0 | 0 | 0 | 0 |
| 67      | 68       | 1       | 0 | 0 | 0 | 0 | 0 | 0 | 0 | 0 | 0 | 0 | 0 | 0 | 0 |
| 67      | 69       | 1       | 0 | 0 | 0 | 0 | 0 | 0 | 0 | 0 | 0 | 0 | 0 | 0 | 0 |
| 69      | 70       | 1       | 0 | 0 | 0 | 0 | 0 | 0 | 0 | 0 | 0 | 0 | 0 | 0 | 0 |
| 69      | 71       | 1       | 0 | 0 | 0 | 0 | 0 | 0 | 0 | 0 | 0 | 0 | 0 | 0 | 0 |
| 69      | 72       | 1       | 0 | 0 | 0 | 0 | 0 | 0 | 0 | 0 | 0 | 0 | 0 | 0 | 0 |
| 72      | 73       | 1       | 0 | 0 | 0 | 0 | 0 | 0 | 0 | 0 | 0 | 0 | 0 | 0 | 0 |
| 72      | 74       | 1       | 0 | 0 | 0 | 0 | 0 | 0 | 0 | 0 | 0 | 0 | 0 | 0 | 0 |
| 72      | 75       | 1       | 0 | 0 | 0 | 0 | 0 | 0 | 0 | 0 | 0 | 0 | 0 | 0 | 0 |

|     |     |   |   |   |   |   |
|-----|-----|---|---|---|---|---|
| 75  | 76  | 1 | 0 | 0 | 0 | 0 |
| 75  | 77  | 1 | 0 | 0 | 0 | 0 |
| 75  | 78  | 1 | 0 | 0 | 0 | 0 |
| 78  | 79  | 1 | 0 | 0 | 0 | 0 |
| 78  | 80  | 1 | 0 | 0 | 0 | 0 |
| 78  | 81  | 1 | 0 | 0 | 0 | 0 |
| 81  | 97  | 1 | 0 | 0 | 0 | 0 |
| 82  | 83  | 1 | 0 | 0 | 0 | 0 |
| 82  | 84  | 1 | 0 | 0 | 0 | 0 |
| 82  | 85  | 1 | 0 | 0 | 0 | 0 |
| 82  | 129 | 1 | 0 | 0 | 0 | 0 |
| 85  | 86  | 1 | 0 | 0 | 0 | 0 |
| 86  | 87  | 1 | 0 | 0 | 0 | 0 |
| 86  | 93  | 2 | 0 | 0 | 0 | 0 |
| 87  | 88  | 1 | 0 | 0 | 0 | 0 |
| 87  | 89  | 1 | 0 | 0 | 0 | 0 |
| 87  | 90  | 1 | 0 | 0 | 0 | 0 |
| 90  | 91  | 1 | 0 | 0 | 0 | 0 |
| 90  | 92  | 1 | 0 | 0 | 0 | 0 |
| 90  | 146 | 1 | 0 | 0 | 0 | 0 |
| 94  | 95  | 1 | 0 | 0 | 0 | 0 |
| 94  | 96  | 1 | 0 | 0 | 0 | 0 |
| 94  | 104 | 1 | 0 | 0 | 0 | 0 |
| 94  | 106 | 1 | 0 | 0 | 0 | 0 |
| 97  | 98  | 1 | 0 | 0 | 0 | 0 |
| 97  | 99  | 1 | 0 | 0 | 0 | 0 |
| 97  | 100 | 1 | 0 | 0 | 0 | 0 |
| 100 | 101 | 1 | 0 | 0 | 0 | 0 |
| 100 | 102 | 1 | 0 | 0 | 0 | 0 |
| 100 | 103 | 1 | 0 | 0 | 0 | 0 |
| 103 | 104 | 1 | 0 | 0 | 0 | 0 |
| 103 | 105 | 2 | 0 | 0 | 0 | 0 |
| 106 | 107 | 1 | 0 | 0 | 0 | 0 |
| 106 | 108 | 1 | 0 | 0 | 0 | 0 |
| 106 | 109 | 1 | 0 | 0 | 0 | 0 |
| 109 | 110 | 1 | 0 | 0 | 0 | 0 |
| 110 | 111 | 1 | 0 | 0 | 0 | 0 |
| 110 | 112 | 1 | 0 | 0 | 0 | 0 |
| 110 | 113 | 1 | 0 | 0 | 0 | 0 |
| 113 | 114 | 1 | 0 | 0 | 0 | 0 |
| 113 | 115 | 1 | 0 | 0 | 0 | 0 |
| 113 | 116 | 1 | 0 | 0 | 0 | 0 |
| 116 | 117 | 1 | 0 | 0 | 0 | 0 |
| 116 | 118 | 1 | 0 | 0 | 0 | 0 |
| 116 | 119 | 1 | 0 | 0 | 0 | 0 |
| 119 | 120 | 1 | 0 | 0 | 0 | 0 |
| 119 | 121 | 1 | 0 | 0 | 0 | 0 |
| 119 | 122 | 1 | 0 | 0 | 0 | 0 |
| 122 | 123 | 1 | 0 | 0 | 0 | 0 |
| 122 | 124 | 1 | 0 | 0 | 0 | 0 |
| 122 | 125 | 1 | 0 | 0 | 0 | 0 |
| 125 | 126 | 1 | 0 | 0 | 0 | 0 |
| 125 | 127 | 1 | 0 | 0 | 0 | 0 |
| 125 | 128 | 1 | 0 | 0 | 0 | 0 |
| 128 | 129 | 1 | 0 | 0 | 0 | 0 |
| 129 | 130 | 1 | 0 | 0 | 0 | 0 |
| 129 | 131 | 1 | 0 | 0 | 0 | 0 |
| 132 | 133 | 1 | 0 | 0 | 0 | 0 |
| 132 | 134 | 1 | 0 | 0 | 0 | 0 |
| 134 | 135 | 1 | 0 | 0 | 0 | 0 |
| 134 | 136 | 1 | 0 | 0 | 0 | 0 |
| 134 | 137 | 1 | 0 | 0 | 0 | 0 |
| 137 | 138 | 1 | 0 | 0 | 0 | 0 |
| 137 | 139 | 1 | 0 | 0 | 0 | 0 |
| 137 | 140 | 1 | 0 | 0 | 0 | 0 |
| 140 | 141 | 1 | 0 | 0 | 0 | 0 |
| 140 | 142 | 1 | 0 | 0 | 0 | 0 |
| 140 | 143 | 1 | 0 | 0 | 0 | 0 |
| 143 | 144 | 1 | 0 | 0 | 0 | 0 |
| 143 | 145 | 1 | 0 | 0 | 0 | 0 |
| 143 | 146 | 1 | 0 | 0 | 0 | 0 |
| 146 | 162 | 1 | 0 | 0 | 0 | 0 |
| 147 | 148 | 1 | 0 | 0 | 0 | 0 |
| 147 | 149 | 1 | 0 | 0 | 0 | 0 |
| 147 | 150 | 1 | 0 | 0 | 0 | 0 |
| 147 | 194 | 1 | 0 | 0 | 0 | 0 |
| 150 | 151 | 1 | 0 | 0 | 0 | 0 |
| 151 | 152 | 1 | 0 | 0 | 0 | 0 |
| 151 | 158 | 2 | 0 | 0 | 0 | 0 |
| 152 | 153 | 1 | 0 | 0 | 0 | 0 |
| 152 | 154 | 1 | 0 | 0 | 0 | 0 |



|        |   |   |   |   |   |
|--------|---|---|---|---|---|
| 152155 | 1 | 0 | 0 | 0 | 0 |
| 155156 | 1 | 0 | 0 | 0 | 0 |
| 155157 | 1 | 0 | 0 | 0 | 0 |
| 155211 | 1 | 0 | 0 | 0 | 0 |
| 159160 | 1 | 0 | 0 | 0 | 0 |
| 159161 | 1 | 0 | 0 | 0 | 0 |
| 159169 | 1 | 0 | 0 | 0 | 0 |
| 159171 | 1 | 0 | 0 | 0 | 0 |
| 162163 | 1 | 0 | 0 | 0 | 0 |
| 162164 | 1 | 0 | 0 | 0 | 0 |
| 162165 | 1 | 0 | 0 | 0 | 0 |
| 165166 | 1 | 0 | 0 | 0 | 0 |
| 165167 | 1 | 0 | 0 | 0 | 0 |
| 165168 | 1 | 0 | 0 | 0 | 0 |
| 168169 | 1 | 0 | 0 | 0 | 0 |
| 168170 | 2 | 0 | 0 | 0 | 0 |
| 171172 | 1 | 0 | 0 | 0 | 0 |
| 171173 | 1 | 0 | 0 | 0 | 0 |
| 171174 | 1 | 0 | 0 | 0 | 0 |
| 174175 | 1 | 0 | 0 | 0 | 0 |
| 175176 | 1 | 0 | 0 | 0 | 0 |
| 175177 | 1 | 0 | 0 | 0 | 0 |
| 175178 | 1 | 0 | 0 | 0 | 0 |
| 178179 | 1 | 0 | 0 | 0 | 0 |
| 178180 | 1 | 0 | 0 | 0 | 0 |
| 178181 | 1 | 0 | 0 | 0 | 0 |
| 181182 | 1 | 0 | 0 | 0 | 0 |
| 181183 | 1 | 0 | 0 | 0 | 0 |
| 181184 | 1 | 0 | 0 | 0 | 0 |
| 184185 | 1 | 0 | 0 | 0 | 0 |
| 184186 | 1 | 0 | 0 | 0 | 0 |
| 184187 | 1 | 0 | 0 | 0 | 0 |
| 187188 | 1 | 0 | 0 | 0 | 0 |
| 187189 | 1 | 0 | 0 | 0 | 0 |
| 187190 | 1 | 0 | 0 | 0 | 0 |
| 190191 | 1 | 0 | 0 | 0 | 0 |
| 190192 | 1 | 0 | 0 | 0 | 0 |
| 190193 | 1 | 0 | 0 | 0 | 0 |
| 193194 | 1 | 0 | 0 | 0 | 0 |
| 194195 | 1 | 0 | 0 | 0 | 0 |
| 194196 | 1 | 0 | 0 | 0 | 0 |
| 197198 | 1 | 0 | 0 | 0 | 0 |
| 197199 | 1 | 0 | 0 | 0 | 0 |
| 199200 | 1 | 0 | 0 | 0 | 0 |
| 199201 | 1 | 0 | 0 | 0 | 0 |
| 199202 | 1 | 0 | 0 | 0 | 0 |
| 202203 | 1 | 0 | 0 | 0 | 0 |
| 202204 | 1 | 0 | 0 | 0 | 0 |
| 202205 | 1 | 0 | 0 | 0 | 0 |
| 205206 | 1 | 0 | 0 | 0 | 0 |
| 205207 | 1 | 0 | 0 | 0 | 0 |
| 205208 | 1 | 0 | 0 | 0 | 0 |
| 208209 | 1 | 0 | 0 | 0 | 0 |
| 208210 | 1 | 0 | 0 | 0 | 0 |
| 208211 | 1 | 0 | 0 | 0 | 0 |
| 211227 | 1 | 0 | 0 | 0 | 0 |
| 212213 | 1 | 0 | 0 | 0 | 0 |
| 212214 | 1 | 0 | 0 | 0 | 0 |
| 212215 | 1 | 0 | 0 | 0 | 0 |
| 212259 | 1 | 0 | 0 | 0 | 0 |
| 215216 | 1 | 0 | 0 | 0 | 0 |
| 216217 | 1 | 0 | 0 | 0 | 0 |
| 216223 | 2 | 0 | 0 | 0 | 0 |
| 217218 | 1 | 0 | 0 | 0 | 0 |
| 217219 | 1 | 0 | 0 | 0 | 0 |
| 217220 | 1 | 0 | 0 | 0 | 0 |
| 220221 | 1 | 0 | 0 | 0 | 0 |
| 220222 | 1 | 0 | 0 | 0 | 0 |
| 220276 | 1 | 0 | 0 | 0 | 0 |
| 224225 | 1 | 0 | 0 | 0 | 0 |
| 224226 | 1 | 0 | 0 | 0 | 0 |
| 224234 | 1 | 0 | 0 | 0 | 0 |
| 224236 | 1 | 0 | 0 | 0 | 0 |
| 227228 | 1 | 0 | 0 | 0 | 0 |
| 227229 | 1 | 0 | 0 | 0 | 0 |
| 227230 | 1 | 0 | 0 | 0 | 0 |
| 230231 | 1 | 0 | 0 | 0 | 0 |
| 230232 | 1 | 0 | 0 | 0 | 0 |
| 230233 | 1 | 0 | 0 | 0 | 0 |
| 233234 | 1 | 0 | 0 | 0 | 0 |
| 233235 | 2 | 0 | 0 | 0 | 0 |

|        |   |   |   |   |   |
|--------|---|---|---|---|---|
| 236237 | 1 | 0 | 0 | 0 | 0 |
| 236238 | 1 | 0 | 0 | 0 | 0 |
| 236239 | 1 | 0 | 0 | 0 | 0 |
| 239240 | 1 | 0 | 0 | 0 | 0 |
| 240241 | 1 | 0 | 0 | 0 | 0 |
| 240242 | 1 | 0 | 0 | 0 | 0 |
| 240243 | 1 | 0 | 0 | 0 | 0 |
| 243244 | 1 | 0 | 0 | 0 | 0 |
| 243245 | 1 | 0 | 0 | 0 | 0 |
| 243246 | 1 | 0 | 0 | 0 | 0 |
| 246247 | 1 | 0 | 0 | 0 | 0 |
| 246248 | 1 | 0 | 0 | 0 | 0 |
| 246249 | 1 | 0 | 0 | 0 | 0 |
| 249250 | 1 | 0 | 0 | 0 | 0 |
| 249251 | 1 | 0 | 0 | 0 | 0 |
| 249252 | 1 | 0 | 0 | 0 | 0 |
| 252253 | 1 | 0 | 0 | 0 | 0 |
| 252254 | 1 | 0 | 0 | 0 | 0 |
| 252255 | 1 | 0 | 0 | 0 | 0 |
| 255256 | 1 | 0 | 0 | 0 | 0 |
| 255257 | 1 | 0 | 0 | 0 | 0 |
| 255258 | 1 | 0 | 0 | 0 | 0 |
| 258259 | 1 | 0 | 0 | 0 | 0 |
| 259260 | 1 | 0 | 0 | 0 | 0 |
| 259261 | 1 | 0 | 0 | 0 | 0 |
| 262263 | 1 | 0 | 0 | 0 | 0 |
| 262264 | 1 | 0 | 0 | 0 | 0 |
| 264265 | 1 | 0 | 0 | 0 | 0 |
| 264266 | 1 | 0 | 0 | 0 | 0 |
| 264267 | 1 | 0 | 0 | 0 | 0 |
| 267268 | 1 | 0 | 0 | 0 | 0 |
| 267269 | 1 | 0 | 0 | 0 | 0 |
| 267270 | 1 | 0 | 0 | 0 | 0 |
| 270271 | 1 | 0 | 0 | 0 | 0 |
| 270272 | 1 | 0 | 0 | 0 | 0 |
| 270273 | 1 | 0 | 0 | 0 | 0 |
| 273274 | 1 | 0 | 0 | 0 | 0 |
| 273275 | 1 | 0 | 0 | 0 | 0 |
| 273276 | 1 | 0 | 0 | 0 | 0 |
| 276292 | 1 | 0 | 0 | 0 | 0 |
| 277278 | 1 | 0 | 0 | 0 | 0 |
| 277279 | 1 | 0 | 0 | 0 | 0 |
| 277280 | 1 | 0 | 0 | 0 | 0 |
| 277324 | 1 | 0 | 0 | 0 | 0 |
| 280281 | 1 | 0 | 0 | 0 | 0 |
| 281282 | 1 | 0 | 0 | 0 | 0 |
| 281288 | 2 | 0 | 0 | 0 | 0 |
| 282283 | 1 | 0 | 0 | 0 | 0 |
| 282284 | 1 | 0 | 0 | 0 | 0 |
| 282285 | 1 | 0 | 0 | 0 | 0 |
| 285286 | 1 | 0 | 0 | 0 | 0 |
| 285287 | 1 | 0 | 0 | 0 | 0 |
| 285341 | 1 | 0 | 0 | 0 | 0 |
| 289290 | 1 | 0 | 0 | 0 | 0 |
| 289291 | 1 | 0 | 0 | 0 | 0 |
| 289299 | 1 | 0 | 0 | 0 | 0 |
| 289301 | 1 | 0 | 0 | 0 | 0 |
| 292293 | 1 | 0 | 0 | 0 | 0 |
| 292294 | 1 | 0 | 0 | 0 | 0 |
| 292295 | 1 | 0 | 0 | 0 | 0 |
| 295296 | 1 | 0 | 0 | 0 | 0 |
| 295297 | 1 | 0 | 0 | 0 | 0 |
| 295298 | 1 | 0 | 0 | 0 | 0 |
| 298299 | 1 | 0 | 0 | 0 | 0 |
| 298300 | 2 | 0 | 0 | 0 | 0 |
| 301302 | 1 | 0 | 0 | 0 | 0 |
| 301303 | 1 | 0 | 0 | 0 | 0 |
| 301304 | 1 | 0 | 0 | 0 | 0 |
| 304305 | 1 | 0 | 0 | 0 | 0 |
| 305306 | 1 | 0 | 0 | 0 | 0 |
| 305307 | 1 | 0 | 0 | 0 | 0 |
| 305308 | 1 | 0 | 0 | 0 | 0 |
| 308309 | 1 | 0 | 0 | 0 | 0 |
| 308310 | 1 | 0 | 0 | 0 | 0 |
| 308311 | 1 | 0 | 0 | 0 | 0 |
| 311312 | 1 | 0 | 0 | 0 | 0 |
| 311313 | 1 | 0 | 0 | 0 | 0 |
| 311314 | 1 | 0 | 0 | 0 | 0 |
| 314315 | 1 | 0 | 0 | 0 | 0 |
| 314316 | 1 | 0 | 0 | 0 | 0 |
| 314317 | 1 | 0 | 0 | 0 | 0 |











|    |     |   |   |   |   |   |
|----|-----|---|---|---|---|---|
| 12 | 14  | 1 | 0 | 0 | 0 | 0 |
| 12 | 15  | 1 | 0 | 0 | 0 | 0 |
| 15 | 16  | 1 | 0 | 0 | 0 | 0 |
| 15 | 17  | 1 | 0 | 0 | 0 | 0 |
| 15 | 18  | 1 | 0 | 0 | 0 | 0 |
| 18 | 19  | 1 | 0 | 0 | 0 | 0 |
| 18 | 35  | 1 | 0 | 0 | 0 | 0 |
| 20 | 21  | 1 | 0 | 0 | 0 | 0 |
| 20 | 22  | 1 | 0 | 0 | 0 | 0 |
| 20 | 23  | 1 | 0 | 0 | 0 | 0 |
| 20 | 67  | 1 | 0 | 0 | 0 | 0 |
| 23 | 24  | 1 | 0 | 0 | 0 | 0 |
| 24 | 25  | 1 | 0 | 0 | 0 | 0 |
| 24 | 31  | 2 | 0 | 0 | 0 | 0 |
| 25 | 26  | 1 | 0 | 0 | 0 | 0 |
| 25 | 27  | 1 | 0 | 0 | 0 | 0 |
| 25 | 28  | 1 | 0 | 0 | 0 | 0 |
| 28 | 29  | 1 | 0 | 0 | 0 | 0 |
| 28 | 30  | 1 | 0 | 0 | 0 | 0 |
| 28 | 87  | 1 | 0 | 0 | 0 | 0 |
| 32 | 33  | 1 | 0 | 0 | 0 | 0 |
| 32 | 34  | 1 | 0 | 0 | 0 | 0 |
| 32 | 42  | 1 | 0 | 0 | 0 | 0 |
| 32 | 44  | 1 | 0 | 0 | 0 | 0 |
| 35 | 36  | 1 | 0 | 0 | 0 | 0 |
| 35 | 37  | 1 | 0 | 0 | 0 | 0 |
| 35 | 38  | 1 | 0 | 0 | 0 | 0 |
| 38 | 39  | 1 | 0 | 0 | 0 | 0 |
| 38 | 40  | 1 | 0 | 0 | 0 | 0 |
| 38 | 41  | 1 | 0 | 0 | 0 | 0 |
| 41 | 42  | 1 | 0 | 0 | 0 | 0 |
| 41 | 43  | 2 | 0 | 0 | 0 | 0 |
| 44 | 45  | 1 | 0 | 0 | 0 | 0 |
| 44 | 46  | 1 | 0 | 0 | 0 | 0 |
| 44 | 47  | 1 | 0 | 0 | 0 | 0 |
| 47 | 48  | 1 | 0 | 0 | 0 | 0 |
| 48 | 49  | 1 | 0 | 0 | 0 | 0 |
| 48 | 50  | 1 | 0 | 0 | 0 | 0 |
| 48 | 51  | 1 | 0 | 0 | 0 | 0 |
| 51 | 52  | 1 | 0 | 0 | 0 | 0 |
| 51 | 53  | 1 | 0 | 0 | 0 | 0 |
| 51 | 54  | 1 | 0 | 0 | 0 | 0 |
| 54 | 55  | 1 | 0 | 0 | 0 | 0 |
| 54 | 56  | 1 | 0 | 0 | 0 | 0 |
| 54 | 57  | 1 | 0 | 0 | 0 | 0 |
| 57 | 58  | 1 | 0 | 0 | 0 | 0 |
| 57 | 59  | 1 | 0 | 0 | 0 | 0 |
| 57 | 60  | 1 | 0 | 0 | 0 | 0 |
| 60 | 61  | 1 | 0 | 0 | 0 | 0 |
| 60 | 62  | 1 | 0 | 0 | 0 | 0 |
| 60 | 63  | 1 | 0 | 0 | 0 | 0 |
| 63 | 64  | 1 | 0 | 0 | 0 | 0 |
| 63 | 65  | 1 | 0 | 0 | 0 | 0 |
| 63 | 66  | 1 | 0 | 0 | 0 | 0 |
| 66 | 67  | 1 | 0 | 0 | 0 | 0 |
| 67 | 68  | 1 | 0 | 0 | 0 | 0 |
| 67 | 69  | 1 | 0 | 0 | 0 | 0 |
| 70 | 71  | 1 | 0 | 0 | 0 | 0 |
| 70 | 72  | 1 | 0 | 0 | 0 | 0 |
| 72 | 73  | 1 | 0 | 0 | 0 | 0 |
| 72 | 74  | 1 | 0 | 0 | 0 | 0 |
| 72 | 75  | 1 | 0 | 0 | 0 | 0 |
| 75 | 76  | 1 | 0 | 0 | 0 | 0 |
| 75 | 77  | 1 | 0 | 0 | 0 | 0 |
| 75 | 78  | 1 | 0 | 0 | 0 | 0 |
| 78 | 79  | 1 | 0 | 0 | 0 | 0 |
| 78 | 80  | 1 | 0 | 0 | 0 | 0 |
| 78 | 81  | 1 | 0 | 0 | 0 | 0 |
| 81 | 82  | 1 | 0 | 0 | 0 | 0 |
| 81 | 83  | 1 | 0 | 0 | 0 | 0 |
| 81 | 84  | 1 | 0 | 0 | 0 | 0 |
| 84 | 85  | 1 | 0 | 0 | 0 | 0 |
| 84 | 86  | 1 | 0 | 0 | 0 | 0 |
| 84 | 87  | 1 | 0 | 0 | 0 | 0 |
| 87 | 103 | 1 | 0 | 0 | 0 | 0 |
| 88 | 89  | 1 | 0 | 0 | 0 | 0 |
| 88 | 90  | 1 | 0 | 0 | 0 | 0 |
| 88 | 91  | 1 | 0 | 0 | 0 | 0 |
| 88 | 135 | 1 | 0 | 0 | 0 | 0 |
| 91 | 92  | 1 | 0 | 0 | 0 | 0 |
| 92 | 93  | 1 | 0 | 0 | 0 | 0 |



|     |     |   |   |   |   |   |
|-----|-----|---|---|---|---|---|
| 92  | 99  | 2 | 0 | 0 | 0 | 0 |
| 93  | 94  | 1 | 0 | 0 | 0 | 0 |
| 93  | 95  | 1 | 0 | 0 | 0 | 0 |
| 93  | 96  | 1 | 0 | 0 | 0 | 0 |
| 96  | 97  | 1 | 0 | 0 | 0 | 0 |
| 96  | 98  | 1 | 0 | 0 | 0 | 0 |
| 96  | 155 | 1 | 0 | 0 | 0 | 0 |
| 100 | 101 | 1 | 0 | 0 | 0 | 0 |
| 100 | 102 | 1 | 0 | 0 | 0 | 0 |
| 100 | 110 | 1 | 0 | 0 | 0 | 0 |
| 100 | 112 | 1 | 0 | 0 | 0 | 0 |
| 103 | 104 | 1 | 0 | 0 | 0 | 0 |
| 103 | 105 | 1 | 0 | 0 | 0 | 0 |
| 103 | 106 | 1 | 0 | 0 | 0 | 0 |
| 106 | 107 | 1 | 0 | 0 | 0 | 0 |
| 106 | 108 | 1 | 0 | 0 | 0 | 0 |
| 106 | 109 | 1 | 0 | 0 | 0 | 0 |
| 109 | 110 | 1 | 0 | 0 | 0 | 0 |
| 109 | 111 | 2 | 0 | 0 | 0 | 0 |
| 112 | 113 | 1 | 0 | 0 | 0 | 0 |
| 112 | 114 | 1 | 0 | 0 | 0 | 0 |
| 112 | 115 | 1 | 0 | 0 | 0 | 0 |
| 115 | 116 | 1 | 0 | 0 | 0 | 0 |
| 116 | 117 | 1 | 0 | 0 | 0 | 0 |
| 116 | 118 | 1 | 0 | 0 | 0 | 0 |
| 116 | 119 | 1 | 0 | 0 | 0 | 0 |
| 119 | 120 | 1 | 0 | 0 | 0 | 0 |
| 119 | 121 | 1 | 0 | 0 | 0 | 0 |
| 119 | 122 | 1 | 0 | 0 | 0 | 0 |
| 122 | 123 | 1 | 0 | 0 | 0 | 0 |
| 122 | 124 | 1 | 0 | 0 | 0 | 0 |
| 122 | 125 | 1 | 0 | 0 | 0 | 0 |
| 125 | 126 | 1 | 0 | 0 | 0 | 0 |
| 125 | 127 | 1 | 0 | 0 | 0 | 0 |
| 125 | 128 | 1 | 0 | 0 | 0 | 0 |
| 128 | 129 | 1 | 0 | 0 | 0 | 0 |
| 128 | 130 | 1 | 0 | 0 | 0 | 0 |
| 128 | 131 | 1 | 0 | 0 | 0 | 0 |
| 131 | 132 | 1 | 0 | 0 | 0 | 0 |
| 131 | 133 | 1 | 0 | 0 | 0 | 0 |
| 131 | 134 | 1 | 0 | 0 | 0 | 0 |
| 134 | 135 | 1 | 0 | 0 | 0 | 0 |
| 135 | 136 | 1 | 0 | 0 | 0 | 0 |
| 135 | 137 | 1 | 0 | 0 | 0 | 0 |
| 138 | 139 | 1 | 0 | 0 | 0 | 0 |
| 138 | 140 | 1 | 0 | 0 | 0 | 0 |
| 140 | 141 | 1 | 0 | 0 | 0 | 0 |
| 140 | 142 | 1 | 0 | 0 | 0 | 0 |
| 140 | 143 | 1 | 0 | 0 | 0 | 0 |
| 143 | 144 | 1 | 0 | 0 | 0 | 0 |
| 143 | 145 | 1 | 0 | 0 | 0 | 0 |
| 143 | 146 | 1 | 0 | 0 | 0 | 0 |
| 146 | 147 | 1 | 0 | 0 | 0 | 0 |
| 146 | 148 | 1 | 0 | 0 | 0 | 0 |
| 146 | 149 | 1 | 0 | 0 | 0 | 0 |
| 149 | 150 | 1 | 0 | 0 | 0 | 0 |
| 149 | 151 | 1 | 0 | 0 | 0 | 0 |
| 149 | 152 | 1 | 0 | 0 | 0 | 0 |
| 152 | 153 | 1 | 0 | 0 | 0 | 0 |
| 152 | 154 | 1 | 0 | 0 | 0 | 0 |
| 152 | 155 | 1 | 0 | 0 | 0 | 0 |
| 155 | 171 | 1 | 0 | 0 | 0 | 0 |
| 156 | 157 | 1 | 0 | 0 | 0 | 0 |
| 156 | 158 | 1 | 0 | 0 | 0 | 0 |
| 156 | 159 | 1 | 0 | 0 | 0 | 0 |
| 156 | 203 | 1 | 0 | 0 | 0 | 0 |
| 159 | 160 | 1 | 0 | 0 | 0 | 0 |
| 160 | 161 | 1 | 0 | 0 | 0 | 0 |
| 160 | 167 | 2 | 0 | 0 | 0 | 0 |
| 161 | 162 | 1 | 0 | 0 | 0 | 0 |
| 161 | 163 | 1 | 0 | 0 | 0 | 0 |
| 161 | 164 | 1 | 0 | 0 | 0 | 0 |
| 164 | 165 | 1 | 0 | 0 | 0 | 0 |
| 164 | 166 | 1 | 0 | 0 | 0 | 0 |
| 164 | 223 | 1 | 0 | 0 | 0 | 0 |
| 168 | 169 | 1 | 0 | 0 | 0 | 0 |
| 168 | 170 | 1 | 0 | 0 | 0 | 0 |
| 168 | 178 | 1 | 0 | 0 | 0 | 0 |
| 168 | 180 | 1 | 0 | 0 | 0 | 0 |
| 171 | 172 | 1 | 0 | 0 | 0 | 0 |
| 171 | 173 | 1 | 0 | 0 | 0 | 0 |

|        |   |   |   |   |   |
|--------|---|---|---|---|---|
| 171174 | 1 | 0 | 0 | 0 | 0 |
| 174175 | 1 | 0 | 0 | 0 | 0 |
| 174176 | 1 | 0 | 0 | 0 | 0 |
| 174177 | 1 | 0 | 0 | 0 | 0 |
| 177178 | 1 | 0 | 0 | 0 | 0 |
| 177179 | 2 | 0 | 0 | 0 | 0 |
| 180181 | 1 | 0 | 0 | 0 | 0 |
| 180182 | 1 | 0 | 0 | 0 | 0 |
| 180183 | 1 | 0 | 0 | 0 | 0 |
| 183184 | 1 | 0 | 0 | 0 | 0 |
| 184185 | 1 | 0 | 0 | 0 | 0 |
| 184186 | 1 | 0 | 0 | 0 | 0 |
| 184187 | 1 | 0 | 0 | 0 | 0 |
| 187188 | 1 | 0 | 0 | 0 | 0 |
| 187189 | 1 | 0 | 0 | 0 | 0 |
| 187190 | 1 | 0 | 0 | 0 | 0 |
| 190191 | 1 | 0 | 0 | 0 | 0 |
| 190192 | 1 | 0 | 0 | 0 | 0 |
| 190193 | 1 | 0 | 0 | 0 | 0 |
| 193194 | 1 | 0 | 0 | 0 | 0 |
| 193195 | 1 | 0 | 0 | 0 | 0 |
| 193196 | 1 | 0 | 0 | 0 | 0 |
| 196197 | 1 | 0 | 0 | 0 | 0 |
| 196198 | 1 | 0 | 0 | 0 | 0 |
| 196199 | 1 | 0 | 0 | 0 | 0 |
| 199200 | 1 | 0 | 0 | 0 | 0 |
| 199201 | 1 | 0 | 0 | 0 | 0 |
| 199202 | 1 | 0 | 0 | 0 | 0 |
| 202203 | 1 | 0 | 0 | 0 | 0 |
| 203204 | 1 | 0 | 0 | 0 | 0 |
| 203205 | 1 | 0 | 0 | 0 | 0 |
| 206207 | 1 | 0 | 0 | 0 | 0 |
| 206208 | 1 | 0 | 0 | 0 | 0 |
| 208209 | 1 | 0 | 0 | 0 | 0 |
| 208210 | 1 | 0 | 0 | 0 | 0 |
| 208211 | 1 | 0 | 0 | 0 | 0 |
| 211212 | 1 | 0 | 0 | 0 | 0 |
| 211213 | 1 | 0 | 0 | 0 | 0 |
| 211214 | 1 | 0 | 0 | 0 | 0 |
| 214215 | 1 | 0 | 0 | 0 | 0 |
| 214216 | 1 | 0 | 0 | 0 | 0 |
| 214217 | 1 | 0 | 0 | 0 | 0 |
| 217218 | 1 | 0 | 0 | 0 | 0 |
| 217219 | 1 | 0 | 0 | 0 | 0 |
| 217220 | 1 | 0 | 0 | 0 | 0 |
| 220221 | 1 | 0 | 0 | 0 | 0 |
| 220222 | 1 | 0 | 0 | 0 | 0 |
| 220223 | 1 | 0 | 0 | 0 | 0 |
| 223239 | 1 | 0 | 0 | 0 | 0 |
| 224225 | 1 | 0 | 0 | 0 | 0 |
| 224226 | 1 | 0 | 0 | 0 | 0 |
| 224227 | 1 | 0 | 0 | 0 | 0 |
| 224271 | 1 | 0 | 0 | 0 | 0 |
| 227228 | 1 | 0 | 0 | 0 | 0 |
| 228229 | 1 | 0 | 0 | 0 | 0 |
| 228235 | 2 | 0 | 0 | 0 | 0 |
| 229230 | 1 | 0 | 0 | 0 | 0 |
| 229231 | 1 | 0 | 0 | 0 | 0 |
| 229232 | 1 | 0 | 0 | 0 | 0 |
| 232233 | 1 | 0 | 0 | 0 | 0 |
| 232234 | 1 | 0 | 0 | 0 | 0 |
| 232291 | 1 | 0 | 0 | 0 | 0 |
| 236237 | 1 | 0 | 0 | 0 | 0 |
| 236238 | 1 | 0 | 0 | 0 | 0 |
| 236246 | 1 | 0 | 0 | 0 | 0 |
| 236248 | 1 | 0 | 0 | 0 | 0 |
| 239240 | 1 | 0 | 0 | 0 | 0 |
| 239241 | 1 | 0 | 0 | 0 | 0 |
| 239242 | 1 | 0 | 0 | 0 | 0 |
| 242243 | 1 | 0 | 0 | 0 | 0 |
| 242244 | 1 | 0 | 0 | 0 | 0 |
| 242245 | 1 | 0 | 0 | 0 | 0 |
| 245246 | 1 | 0 | 0 | 0 | 0 |
| 245247 | 2 | 0 | 0 | 0 | 0 |
| 248249 | 1 | 0 | 0 | 0 | 0 |
| 248250 | 1 | 0 | 0 | 0 | 0 |
| 248251 | 1 | 0 | 0 | 0 | 0 |
| 251252 | 1 | 0 | 0 | 0 | 0 |
| 252253 | 1 | 0 | 0 | 0 | 0 |
| 252254 | 1 | 0 | 0 | 0 | 0 |
| 252255 | 1 | 0 | 0 | 0 | 0 |

|        |   |   |   |   |   |
|--------|---|---|---|---|---|
| 255256 | 1 | 0 | 0 | 0 | 0 |
| 255257 | 1 | 0 | 0 | 0 | 0 |
| 255258 | 1 | 0 | 0 | 0 | 0 |
| 258259 | 1 | 0 | 0 | 0 | 0 |
| 258260 | 1 | 0 | 0 | 0 | 0 |
| 258261 | 1 | 0 | 0 | 0 | 0 |
| 261262 | 1 | 0 | 0 | 0 | 0 |
| 261263 | 1 | 0 | 0 | 0 | 0 |
| 261264 | 1 | 0 | 0 | 0 | 0 |
| 264265 | 1 | 0 | 0 | 0 | 0 |
| 264266 | 1 | 0 | 0 | 0 | 0 |
| 264267 | 1 | 0 | 0 | 0 | 0 |
| 267268 | 1 | 0 | 0 | 0 | 0 |
| 267269 | 1 | 0 | 0 | 0 | 0 |
| 267270 | 1 | 0 | 0 | 0 | 0 |
| 270271 | 1 | 0 | 0 | 0 | 0 |
| 271272 | 1 | 0 | 0 | 0 | 0 |
| 271273 | 1 | 0 | 0 | 0 | 0 |
| 274275 | 1 | 0 | 0 | 0 | 0 |
| 274276 | 1 | 0 | 0 | 0 | 0 |
| 276277 | 1 | 0 | 0 | 0 | 0 |
| 276278 | 1 | 0 | 0 | 0 | 0 |
| 276279 | 1 | 0 | 0 | 0 | 0 |
| 279280 | 1 | 0 | 0 | 0 | 0 |
| 279281 | 1 | 0 | 0 | 0 | 0 |
| 279282 | 1 | 0 | 0 | 0 | 0 |
| 282283 | 1 | 0 | 0 | 0 | 0 |
| 282284 | 1 | 0 | 0 | 0 | 0 |
| 282285 | 1 | 0 | 0 | 0 | 0 |
| 285286 | 1 | 0 | 0 | 0 | 0 |
| 285287 | 1 | 0 | 0 | 0 | 0 |
| 285288 | 1 | 0 | 0 | 0 | 0 |
| 288289 | 1 | 0 | 0 | 0 | 0 |
| 288290 | 1 | 0 | 0 | 0 | 0 |
| 288291 | 1 | 0 | 0 | 0 | 0 |
| 291307 | 1 | 0 | 0 | 0 | 0 |
| 292293 | 1 | 0 | 0 | 0 | 0 |
| 292294 | 1 | 0 | 0 | 0 | 0 |
| 292295 | 1 | 0 | 0 | 0 | 0 |
| 292339 | 1 | 0 | 0 | 0 | 0 |
| 295296 | 1 | 0 | 0 | 0 | 0 |
| 296297 | 1 | 0 | 0 | 0 | 0 |
| 296303 | 2 | 0 | 0 | 0 | 0 |
| 297298 | 1 | 0 | 0 | 0 | 0 |
| 297299 | 1 | 0 | 0 | 0 | 0 |
| 297300 | 1 | 0 | 0 | 0 | 0 |
| 300301 | 1 | 0 | 0 | 0 | 0 |
| 300302 | 1 | 0 | 0 | 0 | 0 |
| 300359 | 1 | 0 | 0 | 0 | 0 |
| 304305 | 1 | 0 | 0 | 0 | 0 |
| 304306 | 1 | 0 | 0 | 0 | 0 |
| 304314 | 1 | 0 | 0 | 0 | 0 |
| 304316 | 1 | 0 | 0 | 0 | 0 |
| 307308 | 1 | 0 | 0 | 0 | 0 |
| 307309 | 1 | 0 | 0 | 0 | 0 |
| 307310 | 1 | 0 | 0 | 0 | 0 |
| 310311 | 1 | 0 | 0 | 0 | 0 |
| 310312 | 1 | 0 | 0 | 0 | 0 |
| 310313 | 1 | 0 | 0 | 0 | 0 |
| 313314 | 1 | 0 | 0 | 0 | 0 |
| 313315 | 2 | 0 | 0 | 0 | 0 |
| 316317 | 1 | 0 | 0 | 0 | 0 |
| 316318 | 1 | 0 | 0 | 0 | 0 |
| 316319 | 1 | 0 | 0 | 0 | 0 |
| 319320 | 1 | 0 | 0 | 0 | 0 |
| 320321 | 1 | 0 | 0 | 0 | 0 |
| 320322 | 1 | 0 | 0 | 0 | 0 |
| 320323 | 1 | 0 | 0 | 0 | 0 |
| 323324 | 1 | 0 | 0 | 0 | 0 |
| 323325 | 1 | 0 | 0 | 0 | 0 |
| 323326 | 1 | 0 | 0 | 0 | 0 |
| 326327 | 1 | 0 | 0 | 0 | 0 |
| 326328 | 1 | 0 | 0 | 0 | 0 |
| 326329 | 1 | 0 | 0 | 0 | 0 |
| 329330 | 1 | 0 | 0 | 0 | 0 |
| 329331 | 1 | 0 | 0 | 0 | 0 |
| 329332 | 1 | 0 | 0 | 0 | 0 |
| 332333 | 1 | 0 | 0 | 0 | 0 |
| 332334 | 1 | 0 | 0 | 0 | 0 |
| 332335 | 1 | 0 | 0 | 0 | 0 |
| 335336 | 1 | 0 | 0 | 0 | 0 |

```

335337 1 0 0 0 0
335338 1 0 0 0 0
338339 1 0 0 0 0
339340 1 0 0 0 0
339341 1 0 0 0 0
342343 1 0 0 0 0
342344 1 0 0 0 0
344345 1 0 0 0 0
344346 1 0 0 0 0
344347 1 0 0 0 0
347348 1 0 0 0 0
347349 1 0 0 0 0
347350 1 0 0 0 0
350351 1 0 0 0 0
350352 1 0 0 0 0
350353 1 0 0 0 0
353354 1 0 0 0 0
353355 1 0 0 0 0
353356 1 0 0 0 0
356357 1 0 0 0 0
356358 1 0 0 0 0
356359 1 0 0 0 0
359360 1 0 0 0 0

```

```

M END
> <NAME>
U32_12

```

```

$$$$
U36_12
MOE2012 3D

```

```

378377 0 0 1 0 0 0 0 0999 V2000
39.1980 -17.2160 -24.4430 O 0 0 0 0 0 0 0 0 0 0 0 0 0 0 0
39.0310 -17.2700 -25.3990 H 0 0 0 0 0 0 0 0 0 0 0 0 0 0 0
40.5610 -16.8430 -24.2810 C 0 0 0 0 0 0 0 0 0 0 0 0 0 0 0
41.1870 -17.6030 -24.7590 H 0 0 0 0 0 0 0 0 0 0 0 0 0 0 0
40.7210 -15.8830 -24.7830 H 0 0 0 0 0 0 0 0 0 0 0 0 0 0 0
40.8760 -16.7360 -22.7940 C 0 0 0 0 0 0 0 0 0 0 0 0 0 0 0
40.2020 -16.0040 -22.3320 H 0 0 0 0 0 0 0 0 0 0 0 0 0 0 0
40.6570 -17.6950 -22.3080 H 0 0 0 0 0 0 0 0 0 0 0 0 0 0 0
42.3330 -16.3400 -22.5510 C 0 0 0 0 0 0 0 0 0 0 0 0 0 0 0
42.9950 -17.0820 -23.0140 H 0 0 0 0 0 0 0 0 0 0 0 0 0 0 0
42.5370 -15.3780 -23.0360 H 0 0 0 0 0 0 0 0 0 0 0 0 0 0 0
42.6460 -16.2370 -21.0560 C 0 0 0 0 0 0 0 0 0 0 0 0 0 0 0
41.9880 -15.4910 -20.5940 H 0 0 0 0 0 0 0 0 0 0 0 0 0 0 0
42.4380 -17.1980 -20.5700 H 0 0 0 0 0 0 0 0 0 0 0 0 0 0 0
44.1090 -15.8480 -20.8170 C 0 0 0 0 0 0 0 0 0 0 0 0 0 0 0
44.7630 -16.5930 -21.2880 H 0 0 0 0 0 0 0 0 0 0 0 0 0 0 0
44.3150 -14.8850 -21.3010 H 0 0 0 0 0 0 0 0 0 0 0 0 0 0 0
44.4260 -15.7520 -19.3200 C 0 0 0 0 0 0 0 0 0 0 0 0 0 0 0
43.7690 -15.0030 -18.8660 H 0 0 0 0 0 0 0 0 0 0 0 0 0 0 0
44.2220 -16.7190 -18.8440 H 0 0 0 0 0 0 0 0 0 0 0 0 0 0 0
45.8320 -15.3810 -19.1350 N 0 0 3 0 0 0 0 0 0 0 0 0 0 0 0
46.4120 -16.0430 -19.6520 H 0 0 0 0 0 0 0 0 0 0 0 0 0 0 0
36.6910 -17.2900 -6.8860 C 0 0 0 0 0 0 0 0 0 0 0 0 0 0 0
36.8370 -18.3690 -7.0170 H 0 0 0 0 0 0 0 0 0 0 0 0 0 0 0
36.8090 -16.8480 -7.8800 H 0 0 0 0 0 0 0 0 0 0 0 0 0 0 0
35.3580 -16.9870 -6.4490 O 0 0 0 0 0 0 0 0 0 0 0 0 0 0 0
34.8430 -17.8120 -5.4950 C 0 0 0 0 0 0 0 0 0 0 0 0 0 0 0
33.5220 -17.2830 -5.0040 C 0 0 0 0 0 0 0 0 0 0 0 0 0 0 0
33.0960 -16.5800 -5.7280 H 0 0 0 0 0 0 0 0 0 0 0 0 0 0 0
32.8240 -18.1270 -4.9630 H 0 0 0 0 0 0 0 0 0 0 0 0 0 0 0
33.6820 -16.6630 -3.6160 C 0 0 0 0 0 0 0 0 0 0 0 0 0 0 0
34.0210 -17.4680 -2.9500 H 0 0 0 0 0 0 0 0 0 0 0 0 0 0 0
32.7010 -16.3540 -3.2380 H 0 0 0 0 0 0 0 0 0 0 0 0 0 0 0
35.3820 -18.8180 -5.0550 O 0 0 0 0 0 0 0 0 0 0 0 0 0 0 0
45.9980 -13.1630 -13.4210 C 0 0 0 0 0 0 0 0 0 0 0 0 0 0 0
47.0820 -13.2820 -13.3050 H 0 0 0 0 0 0 0 0 0 0 0 0 0 0 0
45.7710 -12.1450 -13.0820 H 0 0 0 0 0 0 0 0 0 0 0 0 0 0 0
46.2480 -15.3980 -17.7300 C 0 0 0 0 0 0 0 0 0 0 0 0 0 0 0
45.9940 -16.3590 -17.2640 H 0 0 0 0 0 0 0 0 0 0 0 0 0 0 0
47.3430 -15.3330 -17.7120 H 0 0 0 0 0 0 0 0 0 0 0 0 0 0 0
45.6760 -14.2320 -16.9280 C 0 0 0 0 0 0 0 0 0 0 0 0 0 0 0
45.9620 -13.2790 -17.3880 H 0 0 0 0 0 0 0 0 0 0 0 0 0 0 0
44.5840 -14.2960 -16.8790 H 0 0 0 0 0 0 0 0 0 0 0 0 0 0 0
46.2010 -14.2510 -15.5160 C 0 0 0 0 0 0 0 0 0 0 0 0 0 0 0
45.6100 -13.2520 -14.8000 O 0 0 0 0 0 0 0 0 0 0 0 0 0 0 0
47.0180 -15.0480 -15.0760 O 0 0 0 0 0 0 0 0 0 0 0 0 0 0 0
45.2290 -14.1710 -12.5740 C 0 0 0 0 0 0 0 0 0 0 0 0 0 0 0
44.1540 -14.0040 -12.6960 H 0 0 0 0 0 0 0 0 0 0 0 0 0 0 0
45.4470 -15.1920 -12.9060 H 0 0 0 0 0 0 0 0 0 0 0 0 0 0 0

```











|         |          |         |   |   |   |   |   |   |   |   |   |   |   |   |   |
|---------|----------|---------|---|---|---|---|---|---|---|---|---|---|---|---|---|
| 68.9290 | -23.7170 | 22.9240 | C | 0 | 0 | 0 | 0 | 0 | 0 | 0 | 0 | 0 | 0 | 0 | 0 |
| 68.7110 | -22.6440 | 22.8680 | H | 0 | 0 | 0 | 0 | 0 | 0 | 0 | 0 | 0 | 0 | 0 | 0 |
| 68.5350 | -24.0550 | 23.8900 | H | 0 | 0 | 0 | 0 | 0 | 0 | 0 | 0 | 0 | 0 | 0 | 0 |
| 70.3680 | -23.9980 | 22.9000 | N | 0 | 0 | 3 | 0 | 0 | 0 | 0 | 0 | 0 | 0 | 0 | 0 |
| 70.6640 | -24.2100 | 23.8550 | H | 0 | 0 | 0 | 0 | 0 | 0 | 0 | 0 | 0 | 0 | 0 | 0 |
| 1       | 2        | 1       | 0 | 0 | 0 | 0 |   |   |   |   |   |   |   |   |   |
| 1       | 3        | 1       | 0 | 0 | 0 | 0 |   |   |   |   |   |   |   |   |   |
| 3       | 4        | 1       | 0 | 0 | 0 | 0 |   |   |   |   |   |   |   |   |   |
| 3       | 5        | 1       | 0 | 0 | 0 | 0 |   |   |   |   |   |   |   |   |   |
| 3       | 6        | 1       | 0 | 0 | 0 | 0 |   |   |   |   |   |   |   |   |   |
| 6       | 7        | 1       | 0 | 0 | 0 | 0 |   |   |   |   |   |   |   |   |   |
| 6       | 8        | 1       | 0 | 0 | 0 | 0 |   |   |   |   |   |   |   |   |   |
| 6       | 9        | 1       | 0 | 0 | 0 | 0 |   |   |   |   |   |   |   |   |   |
| 9       | 10       | 1       | 0 | 0 | 0 | 0 |   |   |   |   |   |   |   |   |   |
| 9       | 11       | 1       | 0 | 0 | 0 | 0 |   |   |   |   |   |   |   |   |   |
| 9       | 12       | 1       | 0 | 0 | 0 | 0 |   |   |   |   |   |   |   |   |   |
| 12      | 13       | 1       | 0 | 0 | 0 | 0 |   |   |   |   |   |   |   |   |   |
| 12      | 14       | 1       | 0 | 0 | 0 | 0 |   |   |   |   |   |   |   |   |   |
| 12      | 15       | 1       | 0 | 0 | 0 | 0 |   |   |   |   |   |   |   |   |   |
| 15      | 16       | 1       | 0 | 0 | 0 | 0 |   |   |   |   |   |   |   |   |   |
| 15      | 17       | 1       | 0 | 0 | 0 | 0 |   |   |   |   |   |   |   |   |   |
| 15      | 18       | 1       | 0 | 0 | 0 | 0 |   |   |   |   |   |   |   |   |   |
| 18      | 19       | 1       | 0 | 0 | 0 | 0 |   |   |   |   |   |   |   |   |   |
| 18      | 20       | 1       | 0 | 0 | 0 | 0 |   |   |   |   |   |   |   |   |   |
| 18      | 21       | 1       | 0 | 0 | 0 | 0 |   |   |   |   |   |   |   |   |   |
| 21      | 22       | 1       | 0 | 0 | 0 | 0 |   |   |   |   |   |   |   |   |   |
| 21      | 38       | 1       | 0 | 0 | 0 | 0 |   |   |   |   |   |   |   |   |   |
| 23      | 24       | 1       | 0 | 0 | 0 | 0 |   |   |   |   |   |   |   |   |   |
| 23      | 25       | 1       | 0 | 0 | 0 | 0 |   |   |   |   |   |   |   |   |   |
| 23      | 26       | 1       | 0 | 0 | 0 | 0 |   |   |   |   |   |   |   |   |   |
| 23      | 70       | 1       | 0 | 0 | 0 | 0 |   |   |   |   |   |   |   |   |   |
| 26      | 27       | 1       | 0 | 0 | 0 | 0 |   |   |   |   |   |   |   |   |   |
| 27      | 28       | 1       | 0 | 0 | 0 | 0 |   |   |   |   |   |   |   |   |   |
| 27      | 34       | 2       | 0 | 0 | 0 | 0 |   |   |   |   |   |   |   |   |   |
| 28      | 29       | 1       | 0 | 0 | 0 | 0 |   |   |   |   |   |   |   |   |   |
| 28      | 30       | 1       | 0 | 0 | 0 | 0 |   |   |   |   |   |   |   |   |   |
| 28      | 31       | 1       | 0 | 0 | 0 | 0 |   |   |   |   |   |   |   |   |   |
| 31      | 32       | 1       | 0 | 0 | 0 | 0 |   |   |   |   |   |   |   |   |   |
| 31      | 33       | 1       | 0 | 0 | 0 | 0 |   |   |   |   |   |   |   |   |   |
| 31      | 93       | 1       | 0 | 0 | 0 | 0 |   |   |   |   |   |   |   |   |   |
| 35      | 36       | 1       | 0 | 0 | 0 | 0 |   |   |   |   |   |   |   |   |   |
| 35      | 37       | 1       | 0 | 0 | 0 | 0 |   |   |   |   |   |   |   |   |   |
| 35      | 45       | 1       | 0 | 0 | 0 | 0 |   |   |   |   |   |   |   |   |   |
| 35      | 47       | 1       | 0 | 0 | 0 | 0 |   |   |   |   |   |   |   |   |   |
| 38      | 39       | 1       | 0 | 0 | 0 | 0 |   |   |   |   |   |   |   |   |   |
| 38      | 40       | 1       | 0 | 0 | 0 | 0 |   |   |   |   |   |   |   |   |   |
| 38      | 41       | 1       | 0 | 0 | 0 | 0 |   |   |   |   |   |   |   |   |   |
| 41      | 42       | 1       | 0 | 0 | 0 | 0 |   |   |   |   |   |   |   |   |   |
| 41      | 43       | 1       | 0 | 0 | 0 | 0 |   |   |   |   |   |   |   |   |   |
| 41      | 44       | 1       | 0 | 0 | 0 | 0 |   |   |   |   |   |   |   |   |   |
| 44      | 45       | 1       | 0 | 0 | 0 | 0 |   |   |   |   |   |   |   |   |   |
| 44      | 46       | 2       | 0 | 0 | 0 | 0 |   |   |   |   |   |   |   |   |   |
| 47      | 48       | 1       | 0 | 0 | 0 | 0 |   |   |   |   |   |   |   |   |   |
| 47      | 49       | 1       | 0 | 0 | 0 | 0 |   |   |   |   |   |   |   |   |   |
| 47      | 50       | 1       | 0 | 0 | 0 | 0 |   |   |   |   |   |   |   |   |   |
| 50      | 51       | 1       | 0 | 0 | 0 | 0 |   |   |   |   |   |   |   |   |   |
| 51      | 52       | 1       | 0 | 0 | 0 | 0 |   |   |   |   |   |   |   |   |   |
| 51      | 53       | 1       | 0 | 0 | 0 | 0 |   |   |   |   |   |   |   |   |   |
| 51      | 54       | 1       | 0 | 0 | 0 | 0 |   |   |   |   |   |   |   |   |   |
| 54      | 55       | 1       | 0 | 0 | 0 | 0 |   |   |   |   |   |   |   |   |   |
| 54      | 56       | 1       | 0 | 0 | 0 | 0 |   |   |   |   |   |   |   |   |   |
| 54      | 57       | 1       | 0 | 0 | 0 | 0 |   |   |   |   |   |   |   |   |   |
| 57      | 58       | 1       | 0 | 0 | 0 | 0 |   |   |   |   |   |   |   |   |   |
| 57      | 59       | 1       | 0 | 0 | 0 | 0 |   |   |   |   |   |   |   |   |   |
| 57      | 60       | 1       | 0 | 0 | 0 | 0 |   |   |   |   |   |   |   |   |   |
| 60      | 61       | 1       | 0 | 0 | 0 | 0 |   |   |   |   |   |   |   |   |   |
| 60      | 62       | 1       | 0 | 0 | 0 | 0 |   |   |   |   |   |   |   |   |   |
| 60      | 63       | 1       | 0 | 0 | 0 | 0 |   |   |   |   |   |   |   |   |   |
| 63      | 64       | 1       | 0 | 0 | 0 | 0 |   |   |   |   |   |   |   |   |   |
| 63      | 65       | 1       | 0 | 0 | 0 | 0 |   |   |   |   |   |   |   |   |   |
| 63      | 66       | 1       | 0 | 0 | 0 | 0 |   |   |   |   |   |   |   |   |   |
| 66      | 67       | 1       | 0 | 0 | 0 | 0 |   |   |   |   |   |   |   |   |   |
| 66      | 68       | 1       | 0 | 0 | 0 | 0 |   |   |   |   |   |   |   |   |   |
| 66      | 69       | 1       | 0 | 0 | 0 | 0 |   |   |   |   |   |   |   |   |   |
| 69      | 70       | 1       | 0 | 0 | 0 | 0 |   |   |   |   |   |   |   |   |   |
| 70      | 71       | 1       | 0 | 0 | 0 | 0 |   |   |   |   |   |   |   |   |   |
| 70      | 72       | 1       | 0 | 0 | 0 | 0 |   |   |   |   |   |   |   |   |   |
| 73      | 74       | 1       | 0 | 0 | 0 | 0 |   |   |   |   |   |   |   |   |   |
| 73      | 75       | 1       | 0 | 0 | 0 | 0 |   |   |   |   |   |   |   |   |   |
| 75      | 76       | 1       | 0 | 0 | 0 | 0 |   |   |   |   |   |   |   |   |   |
| 75      | 77       | 1       | 0 | 0 | 0 | 0 |   |   |   |   |   |   |   |   |   |

|     |     |   |   |   |   |   |
|-----|-----|---|---|---|---|---|
| 75  | 78  | 1 | 0 | 0 | 0 | 0 |
| 78  | 79  | 1 | 0 | 0 | 0 | 0 |
| 78  | 80  | 1 | 0 | 0 | 0 | 0 |
| 78  | 81  | 1 | 0 | 0 | 0 | 0 |
| 81  | 82  | 1 | 0 | 0 | 0 | 0 |
| 81  | 83  | 1 | 0 | 0 | 0 | 0 |
| 81  | 84  | 1 | 0 | 0 | 0 | 0 |
| 84  | 85  | 1 | 0 | 0 | 0 | 0 |
| 84  | 86  | 1 | 0 | 0 | 0 | 0 |
| 84  | 87  | 1 | 0 | 0 | 0 | 0 |
| 87  | 88  | 1 | 0 | 0 | 0 | 0 |
| 87  | 89  | 1 | 0 | 0 | 0 | 0 |
| 87  | 90  | 1 | 0 | 0 | 0 | 0 |
| 90  | 91  | 1 | 0 | 0 | 0 | 0 |
| 90  | 92  | 1 | 0 | 0 | 0 | 0 |
| 90  | 93  | 1 | 0 | 0 | 0 | 0 |
| 93  | 109 | 1 | 0 | 0 | 0 | 0 |
| 94  | 95  | 1 | 0 | 0 | 0 | 0 |
| 94  | 96  | 1 | 0 | 0 | 0 | 0 |
| 94  | 97  | 1 | 0 | 0 | 0 | 0 |
| 94  | 141 | 1 | 0 | 0 | 0 | 0 |
| 97  | 98  | 1 | 0 | 0 | 0 | 0 |
| 98  | 99  | 1 | 0 | 0 | 0 | 0 |
| 98  | 105 | 2 | 0 | 0 | 0 | 0 |
| 99  | 100 | 1 | 0 | 0 | 0 | 0 |
| 99  | 101 | 1 | 0 | 0 | 0 | 0 |
| 99  | 102 | 1 | 0 | 0 | 0 | 0 |
| 102 | 103 | 1 | 0 | 0 | 0 | 0 |
| 102 | 104 | 1 | 0 | 0 | 0 | 0 |
| 102 | 164 | 1 | 0 | 0 | 0 | 0 |
| 106 | 107 | 1 | 0 | 0 | 0 | 0 |
| 106 | 108 | 1 | 0 | 0 | 0 | 0 |
| 106 | 116 | 1 | 0 | 0 | 0 | 0 |
| 106 | 118 | 1 | 0 | 0 | 0 | 0 |
| 109 | 110 | 1 | 0 | 0 | 0 | 0 |
| 109 | 111 | 1 | 0 | 0 | 0 | 0 |
| 109 | 112 | 1 | 0 | 0 | 0 | 0 |
| 112 | 113 | 1 | 0 | 0 | 0 | 0 |
| 112 | 114 | 1 | 0 | 0 | 0 | 0 |
| 112 | 115 | 1 | 0 | 0 | 0 | 0 |
| 115 | 116 | 1 | 0 | 0 | 0 | 0 |
| 115 | 117 | 2 | 0 | 0 | 0 | 0 |
| 118 | 119 | 1 | 0 | 0 | 0 | 0 |
| 118 | 120 | 1 | 0 | 0 | 0 | 0 |
| 118 | 121 | 1 | 0 | 0 | 0 | 0 |
| 121 | 122 | 1 | 0 | 0 | 0 | 0 |
| 122 | 123 | 1 | 0 | 0 | 0 | 0 |
| 122 | 124 | 1 | 0 | 0 | 0 | 0 |
| 122 | 125 | 1 | 0 | 0 | 0 | 0 |
| 125 | 126 | 1 | 0 | 0 | 0 | 0 |
| 125 | 127 | 1 | 0 | 0 | 0 | 0 |
| 125 | 128 | 1 | 0 | 0 | 0 | 0 |
| 128 | 129 | 1 | 0 | 0 | 0 | 0 |
| 128 | 130 | 1 | 0 | 0 | 0 | 0 |
| 128 | 131 | 1 | 0 | 0 | 0 | 0 |
| 131 | 132 | 1 | 0 | 0 | 0 | 0 |
| 131 | 133 | 1 | 0 | 0 | 0 | 0 |
| 131 | 134 | 1 | 0 | 0 | 0 | 0 |
| 134 | 135 | 1 | 0 | 0 | 0 | 0 |
| 134 | 136 | 1 | 0 | 0 | 0 | 0 |
| 134 | 137 | 1 | 0 | 0 | 0 | 0 |
| 137 | 138 | 1 | 0 | 0 | 0 | 0 |
| 137 | 139 | 1 | 0 | 0 | 0 | 0 |
| 137 | 140 | 1 | 0 | 0 | 0 | 0 |
| 140 | 141 | 1 | 0 | 0 | 0 | 0 |
| 141 | 142 | 1 | 0 | 0 | 0 | 0 |
| 141 | 143 | 1 | 0 | 0 | 0 | 0 |
| 144 | 145 | 1 | 0 | 0 | 0 | 0 |
| 144 | 146 | 1 | 0 | 0 | 0 | 0 |
| 146 | 147 | 1 | 0 | 0 | 0 | 0 |
| 146 | 148 | 1 | 0 | 0 | 0 | 0 |
| 146 | 149 | 1 | 0 | 0 | 0 | 0 |
| 149 | 150 | 1 | 0 | 0 | 0 | 0 |
| 149 | 151 | 1 | 0 | 0 | 0 | 0 |
| 149 | 152 | 1 | 0 | 0 | 0 | 0 |
| 152 | 153 | 1 | 0 | 0 | 0 | 0 |
| 152 | 154 | 1 | 0 | 0 | 0 | 0 |
| 152 | 155 | 1 | 0 | 0 | 0 | 0 |
| 155 | 156 | 1 | 0 | 0 | 0 | 0 |
| 155 | 157 | 1 | 0 | 0 | 0 | 0 |
| 155 | 158 | 1 | 0 | 0 | 0 | 0 |

|        |   |   |   |   |   |
|--------|---|---|---|---|---|
| 158159 | 1 | 0 | 0 | 0 | 0 |
| 158160 | 1 | 0 | 0 | 0 | 0 |
| 158161 | 1 | 0 | 0 | 0 | 0 |
| 161162 | 1 | 0 | 0 | 0 | 0 |
| 161163 | 1 | 0 | 0 | 0 | 0 |
| 161164 | 1 | 0 | 0 | 0 | 0 |
| 164180 | 1 | 0 | 0 | 0 | 0 |
| 165166 | 1 | 0 | 0 | 0 | 0 |
| 165167 | 1 | 0 | 0 | 0 | 0 |
| 165168 | 1 | 0 | 0 | 0 | 0 |
| 165212 | 1 | 0 | 0 | 0 | 0 |
| 168169 | 1 | 0 | 0 | 0 | 0 |
| 169170 | 1 | 0 | 0 | 0 | 0 |
| 169176 | 2 | 0 | 0 | 0 | 0 |
| 170171 | 1 | 0 | 0 | 0 | 0 |
| 170172 | 1 | 0 | 0 | 0 | 0 |
| 170173 | 1 | 0 | 0 | 0 | 0 |
| 173174 | 1 | 0 | 0 | 0 | 0 |
| 173175 | 1 | 0 | 0 | 0 | 0 |
| 173235 | 1 | 0 | 0 | 0 | 0 |
| 177178 | 1 | 0 | 0 | 0 | 0 |
| 177179 | 1 | 0 | 0 | 0 | 0 |
| 177187 | 1 | 0 | 0 | 0 | 0 |
| 177189 | 1 | 0 | 0 | 0 | 0 |
| 180181 | 1 | 0 | 0 | 0 | 0 |
| 180182 | 1 | 0 | 0 | 0 | 0 |
| 180183 | 1 | 0 | 0 | 0 | 0 |
| 183184 | 1 | 0 | 0 | 0 | 0 |
| 183185 | 1 | 0 | 0 | 0 | 0 |
| 183186 | 1 | 0 | 0 | 0 | 0 |
| 186187 | 1 | 0 | 0 | 0 | 0 |
| 186188 | 2 | 0 | 0 | 0 | 0 |
| 189190 | 1 | 0 | 0 | 0 | 0 |
| 189191 | 1 | 0 | 0 | 0 | 0 |
| 189192 | 1 | 0 | 0 | 0 | 0 |
| 192193 | 1 | 0 | 0 | 0 | 0 |
| 193194 | 1 | 0 | 0 | 0 | 0 |
| 193195 | 1 | 0 | 0 | 0 | 0 |
| 193196 | 1 | 0 | 0 | 0 | 0 |
| 196197 | 1 | 0 | 0 | 0 | 0 |
| 196198 | 1 | 0 | 0 | 0 | 0 |
| 196199 | 1 | 0 | 0 | 0 | 0 |
| 199200 | 1 | 0 | 0 | 0 | 0 |
| 199201 | 1 | 0 | 0 | 0 | 0 |
| 199202 | 1 | 0 | 0 | 0 | 0 |
| 202203 | 1 | 0 | 0 | 0 | 0 |
| 202204 | 1 | 0 | 0 | 0 | 0 |
| 202205 | 1 | 0 | 0 | 0 | 0 |
| 205206 | 1 | 0 | 0 | 0 | 0 |
| 205207 | 1 | 0 | 0 | 0 | 0 |
| 205208 | 1 | 0 | 0 | 0 | 0 |
| 208209 | 1 | 0 | 0 | 0 | 0 |
| 208210 | 1 | 0 | 0 | 0 | 0 |
| 208211 | 1 | 0 | 0 | 0 | 0 |
| 211212 | 1 | 0 | 0 | 0 | 0 |
| 212213 | 1 | 0 | 0 | 0 | 0 |
| 212214 | 1 | 0 | 0 | 0 | 0 |
| 215216 | 1 | 0 | 0 | 0 | 0 |
| 215217 | 1 | 0 | 0 | 0 | 0 |
| 217218 | 1 | 0 | 0 | 0 | 0 |
| 217219 | 1 | 0 | 0 | 0 | 0 |
| 217220 | 1 | 0 | 0 | 0 | 0 |
| 220221 | 1 | 0 | 0 | 0 | 0 |
| 220222 | 1 | 0 | 0 | 0 | 0 |
| 220223 | 1 | 0 | 0 | 0 | 0 |
| 223224 | 1 | 0 | 0 | 0 | 0 |
| 223225 | 1 | 0 | 0 | 0 | 0 |
| 223226 | 1 | 0 | 0 | 0 | 0 |
| 226227 | 1 | 0 | 0 | 0 | 0 |
| 226228 | 1 | 0 | 0 | 0 | 0 |
| 226229 | 1 | 0 | 0 | 0 | 0 |
| 229230 | 1 | 0 | 0 | 0 | 0 |
| 229231 | 1 | 0 | 0 | 0 | 0 |
| 229232 | 1 | 0 | 0 | 0 | 0 |
| 232233 | 1 | 0 | 0 | 0 | 0 |
| 232234 | 1 | 0 | 0 | 0 | 0 |
| 232235 | 1 | 0 | 0 | 0 | 0 |
| 235251 | 1 | 0 | 0 | 0 | 0 |
| 236237 | 1 | 0 | 0 | 0 | 0 |
| 236238 | 1 | 0 | 0 | 0 | 0 |
| 236239 | 1 | 0 | 0 | 0 | 0 |

|        |   |   |   |   |   |
|--------|---|---|---|---|---|
| 236283 | 1 | 0 | 0 | 0 | 0 |
| 239240 | 1 | 0 | 0 | 0 | 0 |
| 240241 | 1 | 0 | 0 | 0 | 0 |
| 240247 | 2 | 0 | 0 | 0 | 0 |
| 241242 | 1 | 0 | 0 | 0 | 0 |
| 241243 | 1 | 0 | 0 | 0 | 0 |
| 241244 | 1 | 0 | 0 | 0 | 0 |
| 244245 | 1 | 0 | 0 | 0 | 0 |
| 244246 | 1 | 0 | 0 | 0 | 0 |
| 244306 | 1 | 0 | 0 | 0 | 0 |
| 248249 | 1 | 0 | 0 | 0 | 0 |
| 248250 | 1 | 0 | 0 | 0 | 0 |
| 248258 | 1 | 0 | 0 | 0 | 0 |
| 248260 | 1 | 0 | 0 | 0 | 0 |
| 251252 | 1 | 0 | 0 | 0 | 0 |
| 251253 | 1 | 0 | 0 | 0 | 0 |
| 251254 | 1 | 0 | 0 | 0 | 0 |
| 254255 | 1 | 0 | 0 | 0 | 0 |
| 254256 | 1 | 0 | 0 | 0 | 0 |
| 254257 | 1 | 0 | 0 | 0 | 0 |
| 257258 | 1 | 0 | 0 | 0 | 0 |
| 257259 | 2 | 0 | 0 | 0 | 0 |
| 260261 | 1 | 0 | 0 | 0 | 0 |
| 260262 | 1 | 0 | 0 | 0 | 0 |
| 260263 | 1 | 0 | 0 | 0 | 0 |
| 263264 | 1 | 0 | 0 | 0 | 0 |
| 264265 | 1 | 0 | 0 | 0 | 0 |
| 264266 | 1 | 0 | 0 | 0 | 0 |
| 264267 | 1 | 0 | 0 | 0 | 0 |
| 267268 | 1 | 0 | 0 | 0 | 0 |
| 267269 | 1 | 0 | 0 | 0 | 0 |
| 267270 | 1 | 0 | 0 | 0 | 0 |
| 270271 | 1 | 0 | 0 | 0 | 0 |
| 270272 | 1 | 0 | 0 | 0 | 0 |
| 270273 | 1 | 0 | 0 | 0 | 0 |
| 273274 | 1 | 0 | 0 | 0 | 0 |
| 273275 | 1 | 0 | 0 | 0 | 0 |
| 273276 | 1 | 0 | 0 | 0 | 0 |
| 276277 | 1 | 0 | 0 | 0 | 0 |
| 276278 | 1 | 0 | 0 | 0 | 0 |
| 276279 | 1 | 0 | 0 | 0 | 0 |
| 279280 | 1 | 0 | 0 | 0 | 0 |
| 279281 | 1 | 0 | 0 | 0 | 0 |
| 279282 | 1 | 0 | 0 | 0 | 0 |
| 282283 | 1 | 0 | 0 | 0 | 0 |
| 283284 | 1 | 0 | 0 | 0 | 0 |
| 283285 | 1 | 0 | 0 | 0 | 0 |
| 286287 | 1 | 0 | 0 | 0 | 0 |
| 286288 | 1 | 0 | 0 | 0 | 0 |
| 288289 | 1 | 0 | 0 | 0 | 0 |
| 288290 | 1 | 0 | 0 | 0 | 0 |
| 288291 | 1 | 0 | 0 | 0 | 0 |
| 291292 | 1 | 0 | 0 | 0 | 0 |
| 291293 | 1 | 0 | 0 | 0 | 0 |
| 291294 | 1 | 0 | 0 | 0 | 0 |
| 294295 | 1 | 0 | 0 | 0 | 0 |
| 294296 | 1 | 0 | 0 | 0 | 0 |
| 294297 | 1 | 0 | 0 | 0 | 0 |
| 297298 | 1 | 0 | 0 | 0 | 0 |
| 297299 | 1 | 0 | 0 | 0 | 0 |
| 297300 | 1 | 0 | 0 | 0 | 0 |
| 300301 | 1 | 0 | 0 | 0 | 0 |
| 300302 | 1 | 0 | 0 | 0 | 0 |
| 300303 | 1 | 0 | 0 | 0 | 0 |
| 303304 | 1 | 0 | 0 | 0 | 0 |
| 303305 | 1 | 0 | 0 | 0 | 0 |
| 303306 | 1 | 0 | 0 | 0 | 0 |
| 306322 | 1 | 0 | 0 | 0 | 0 |
| 307308 | 1 | 0 | 0 | 0 | 0 |
| 307309 | 1 | 0 | 0 | 0 | 0 |
| 307310 | 1 | 0 | 0 | 0 | 0 |
| 307354 | 1 | 0 | 0 | 0 | 0 |
| 310311 | 1 | 0 | 0 | 0 | 0 |
| 311312 | 1 | 0 | 0 | 0 | 0 |
| 311318 | 2 | 0 | 0 | 0 | 0 |
| 312313 | 1 | 0 | 0 | 0 | 0 |
| 312314 | 1 | 0 | 0 | 0 | 0 |
| 312315 | 1 | 0 | 0 | 0 | 0 |
| 315316 | 1 | 0 | 0 | 0 | 0 |
| 315317 | 1 | 0 | 0 | 0 | 0 |
| 315377 | 1 | 0 | 0 | 0 | 0 |

```

319320 1 0 0 0 0
319321 1 0 0 0 0
319329 1 0 0 0 0
319331 1 0 0 0 0
322323 1 0 0 0 0
322324 1 0 0 0 0
322325 1 0 0 0 0
325326 1 0 0 0 0
325327 1 0 0 0 0
325328 1 0 0 0 0
328329 1 0 0 0 0
328330 2 0 0 0 0
331332 1 0 0 0 0
331333 1 0 0 0 0
331334 1 0 0 0 0
334335 1 0 0 0 0
335336 1 0 0 0 0
335337 1 0 0 0 0
335338 1 0 0 0 0
338339 1 0 0 0 0
338340 1 0 0 0 0
338341 1 0 0 0 0
341342 1 0 0 0 0
341343 1 0 0 0 0
341344 1 0 0 0 0
344345 1 0 0 0 0
344346 1 0 0 0 0
344347 1 0 0 0 0
347348 1 0 0 0 0
347349 1 0 0 0 0
347350 1 0 0 0 0
350351 1 0 0 0 0
350352 1 0 0 0 0
350353 1 0 0 0 0
353354 1 0 0 0 0
354355 1 0 0 0 0
354356 1 0 0 0 0
357358 1 0 0 0 0
357359 1 0 0 0 0
359360 1 0 0 0 0
359361 1 0 0 0 0
359362 1 0 0 0 0
362363 1 0 0 0 0
362364 1 0 0 0 0
362365 1 0 0 0 0
365366 1 0 0 0 0
365367 1 0 0 0 0
365368 1 0 0 0 0
368369 1 0 0 0 0
368370 1 0 0 0 0
368371 1 0 0 0 0
371372 1 0 0 0 0
371373 1 0 0 0 0
371374 1 0 0 0 0
374375 1 0 0 0 0
374376 1 0 0 0 0
374377 1 0 0 0 0
377378 1 0 0 0 0

```

```

M END
> <NAME>
U36_12

```

```

$$$$
U75_12
MOE2012 3D

```

```

384383 0 0 1 0 0 0 0 0999 V2000
13.7450 -9.2700 4.3020 C 0 0 0 0 0 0 0 0 0 0 0 0 0 0 0
14.2420 -8.5330 4.9410 H 0 0 0 0 0 0 0 0 0 0 0 0 0 0 0
13.0590 -9.8560 4.9210 H 0 0 0 0 0 0 0 0 0 0 0 0 0 0 0
13.1420 -8.7250 3.5680 H 0 0 0 0 0 0 0 0 0 0 0 0 0 0 0
14.7660 -10.1480 3.5830 C 0 0 0 0 0 0 0 0 0 0 0 0 0 0 0
14.2530 -10.8830 2.9500 H 0 0 0 0 0 0 0 0 0 0 0 0 0 0 0
15.3250 -9.4850 2.9110 H 0 0 0 0 0 0 0 0 0 0 0 0 0 0 0
15.7030 -10.8090 4.5100 N 0 0 0 0 0 0 0 0 0 0 0 0 0 0 0
16.8420 -11.3800 3.7620 C 0 0 0 0 0 0 0 0 0 0 0 0 0 0 0
16.5210 -12.2470 3.1700 H 0 0 0 0 0 0 0 0 0 0 0 0 0 0 0
17.2020 -10.6250 3.0520 H 0 0 0 0 0 0 0 0 0 0 0 0 0 0 0
18.0300 -11.7590 4.6750 C 0 0 0 0 0 0 0 0 0 0 0 0 0 0 0
18.3530 -10.8880 5.2560 H 0 0 0 0 0 0 0 0 0 0 0 0 0 0 0
17.7050 -12.4970 5.4170 H 0 0 0 0 0 0 0 0 0 0 0 0 0 0 0

```











|         |        |         |   |   |   |   |   |   |   |   |   |   |   |   |   |   |
|---------|--------|---------|---|---|---|---|---|---|---|---|---|---|---|---|---|---|
| 43.9140 | 5.1520 | 33.8150 | O | 0 | 0 | 0 | 0 | 0 | 0 | 0 | 0 | 0 | 0 | 0 | 0 | 0 |
| 43.1990 | 4.3700 | 34.7730 | C | 0 | 0 | 0 | 0 | 0 | 0 | 0 | 0 | 0 | 0 | 0 | 0 | 0 |
| 43.1040 | 3.3380 | 34.4140 | H | 0 | 0 | 0 | 0 | 0 | 0 | 0 | 0 | 0 | 0 | 0 | 0 | 0 |
| 43.8160 | 4.3400 | 35.6770 | H | 0 | 0 | 0 | 0 | 0 | 0 | 0 | 0 | 0 | 0 | 0 | 0 | 0 |
| 41.8370 | 4.9780 | 35.1060 | C | 0 | 0 | 0 | 0 | 0 | 0 | 0 | 0 | 0 | 0 | 0 | 0 | 0 |
| 41.9720 | 6.0240 | 35.4050 | H | 0 | 0 | 0 | 0 | 0 | 0 | 0 | 0 | 0 | 0 | 0 | 0 | 0 |
| 41.2090 | 4.9980 | 34.2090 | H | 0 | 0 | 0 | 0 | 0 | 0 | 0 | 0 | 0 | 0 | 0 | 0 | 0 |
| 41.1150 | 4.2030 | 36.2080 | C | 0 | 0 | 0 | 0 | 0 | 0 | 0 | 0 | 0 | 0 | 0 | 0 | 0 |
| 41.0030 | 3.1540 | 35.9080 | H | 0 | 0 | 0 | 0 | 0 | 0 | 0 | 0 | 0 | 0 | 0 | 0 | 0 |
| 41.7170 | 4.2160 | 37.1250 | H | 0 | 0 | 0 | 0 | 0 | 0 | 0 | 0 | 0 | 0 | 0 | 0 | 0 |
| 39.7360 | 4.8060 | 36.4880 | C | 0 | 0 | 0 | 0 | 0 | 0 | 0 | 0 | 0 | 0 | 0 | 0 | 0 |
| 39.8500 | 5.8540 | 36.7920 | H | 0 | 0 | 0 | 0 | 0 | 0 | 0 | 0 | 0 | 0 | 0 | 0 | 0 |
| 39.1420 | 4.8020 | 35.5660 | H | 0 | 0 | 0 | 0 | 0 | 0 | 0 | 0 | 0 | 0 | 0 | 0 | 0 |
| 38.9920 | 4.0360 | 37.5760 | C | 0 | 0 | 0 | 0 | 0 | 0 | 0 | 0 | 0 | 0 | 0 | 0 | 0 |
| 38.8860 | 2.9820 | 37.2920 | H | 0 | 0 | 0 | 0 | 0 | 0 | 0 | 0 | 0 | 0 | 0 | 0 | 0 |
| 39.5700 | 4.0400 | 38.5080 | H | 0 | 0 | 0 | 0 | 0 | 0 | 0 | 0 | 0 | 0 | 0 | 0 | 0 |
| 37.6100 | 4.6290 | 37.8350 | C | 0 | 0 | 0 | 0 | 0 | 0 | 0 | 0 | 0 | 0 | 0 | 0 | 0 |
| 37.7020 | 5.6720 | 38.1580 | H | 0 | 0 | 0 | 0 | 0 | 0 | 0 | 0 | 0 | 0 | 0 | 0 | 0 |
| 37.0080 | 4.5910 | 36.9210 | H | 0 | 0 | 0 | 0 | 0 | 0 | 0 | 0 | 0 | 0 | 0 | 0 | 0 |
| 36.9810 | 3.8680 | 38.8670 | O | 0 | 0 | 0 | 0 | 0 | 0 | 0 | 0 | 0 | 0 | 0 | 0 | 0 |
| 35.6760 | 4.3420 | 39.2000 | C | 0 | 0 | 0 | 0 | 0 | 0 | 0 | 0 | 0 | 0 | 0 | 0 | 0 |
| 35.6420 | 5.4380 | 39.2030 | H | 0 | 0 | 0 | 0 | 0 | 0 | 0 | 0 | 0 | 0 | 0 | 0 | 0 |
| 35.4730 | 4.0300 | 40.2300 | H | 0 | 0 | 0 | 0 | 0 | 0 | 0 | 0 | 0 | 0 | 0 | 0 | 0 |
| 29.2600 | 3.7190 | 47.4800 | C | 0 | 0 | 0 | 0 | 0 | 0 | 0 | 0 | 0 | 0 | 0 | 0 | 0 |
| 28.3650 | 4.2770 | 47.1840 | H | 0 | 0 | 0 | 0 | 0 | 0 | 0 | 0 | 0 | 0 | 0 | 0 | 0 |
| 29.9970 | 4.4290 | 47.8670 | H | 0 | 0 | 0 | 0 | 0 | 0 | 0 | 0 | 0 | 0 | 0 | 0 | 0 |
| 28.9800 | 3.0540 | 48.3040 | H | 0 | 0 | 0 | 0 | 0 | 0 | 0 | 0 | 0 | 0 | 0 | 0 | 0 |
| 29.8060 | 2.9000 | 46.3140 | C | 0 | 0 | 0 | 0 | 0 | 0 | 0 | 0 | 0 | 0 | 0 | 0 | 0 |
| 30.7020 | 2.3500 | 46.6280 | H | 0 | 0 | 0 | 0 | 0 | 0 | 0 | 0 | 0 | 0 | 0 | 0 | 0 |
| 29.0400 | 2.1510 | 46.0770 | H | 0 | 0 | 0 | 0 | 0 | 0 | 0 | 0 | 0 | 0 | 0 | 0 | 0 |
| 30.0770 | 3.7190 | 45.1190 | N | 0 | 0 | 0 | 0 | 0 | 0 | 0 | 0 | 0 | 0 | 0 | 0 | 0 |
| 30.3120 | 2.8440 | 43.9490 | C | 0 | 0 | 0 | 0 | 0 | 0 | 0 | 0 | 0 | 0 | 0 | 0 | 0 |
| 31.2810 | 2.3350 | 44.0370 | H | 0 | 0 | 0 | 0 | 0 | 0 | 0 | 0 | 0 | 0 | 0 | 0 | 0 |
| 29.5440 | 2.0580 | 43.9260 | H | 0 | 0 | 0 | 0 | 0 | 0 | 0 | 0 | 0 | 0 | 0 | 0 | 0 |
| 30.2150 | 3.6030 | 42.6090 | C | 0 | 0 | 0 | 0 | 0 | 0 | 0 | 0 | 0 | 0 | 0 | 0 | 0 |
| 29.2230 | 4.0650 | 42.5360 | H | 0 | 0 | 0 | 0 | 0 | 0 | 0 | 0 | 0 | 0 | 0 | 0 | 0 |
| 30.9620 | 4.4010 | 42.5710 | H | 0 | 0 | 0 | 0 | 0 | 0 | 0 | 0 | 0 | 0 | 0 | 0 | 0 |
| 30.4180 | 2.6800 | 41.4860 | N | 0 | 0 | 3 | 0 | 0 | 0 | 0 | 0 | 0 | 0 | 0 | 0 | 0 |
| 31.3750 | 2.3080 | 41.5120 | H | 0 | 0 | 0 | 0 | 0 | 0 | 0 | 0 | 0 | 0 | 0 | 0 | 0 |
| 31.1960 | 4.6550 | 45.3310 | C | 0 | 0 | 0 | 0 | 0 | 0 | 0 | 0 | 0 | 0 | 0 | 0 | 0 |
| 31.6910 | 4.4970 | 46.2970 | H | 0 | 0 | 0 | 0 | 0 | 0 | 0 | 0 | 0 | 0 | 0 | 0 | 0 |
| 31.9900 | 4.5290 | 44.5850 | H | 0 | 0 | 0 | 0 | 0 | 0 | 0 | 0 | 0 | 0 | 0 | 0 | 0 |
| 30.6840 | 6.0880 | 45.2580 | C | 0 | 0 | 0 | 0 | 0 | 0 | 0 | 0 | 0 | 0 | 0 | 0 | 0 |
| 29.9310 | 6.2850 | 46.0280 | H | 0 | 0 | 0 | 0 | 0 | 0 | 0 | 0 | 0 | 0 | 0 | 0 | 0 |
| 30.2390 | 6.3010 | 44.2800 | H | 0 | 0 | 0 | 0 | 0 | 0 | 0 | 0 | 0 | 0 | 0 | 0 | 0 |
| 31.5110 | 6.7900 | 45.4100 | H | 0 | 0 | 0 | 0 | 0 | 0 | 0 | 0 | 0 | 0 | 0 | 0 | 0 |
| 1       | 2      | 1       | 0 | 0 | 0 | 0 |   |   |   |   |   |   |   |   |   |   |
| 1       | 3      | 1       | 0 | 0 | 0 | 0 |   |   |   |   |   |   |   |   |   |   |
| 1       | 4      | 1       | 0 | 0 | 0 | 0 |   |   |   |   |   |   |   |   |   |   |
| 1       | 5      | 1       | 0 | 0 | 0 | 0 |   |   |   |   |   |   |   |   |   |   |
| 5       | 6      | 1       | 0 | 0 | 0 | 0 |   |   |   |   |   |   |   |   |   |   |
| 5       | 7      | 1       | 0 | 0 | 0 | 0 |   |   |   |   |   |   |   |   |   |   |
| 5       | 8      | 1       | 0 | 0 | 0 | 0 |   |   |   |   |   |   |   |   |   |   |
| 8       | 9      | 1       | 0 | 0 | 0 | 0 |   |   |   |   |   |   |   |   |   |   |
| 8       | 17     | 1       | 0 | 0 | 0 | 0 |   |   |   |   |   |   |   |   |   |   |
| 9       | 10     | 1       | 0 | 0 | 0 | 0 |   |   |   |   |   |   |   |   |   |   |
| 9       | 11     | 1       | 0 | 0 | 0 | 0 |   |   |   |   |   |   |   |   |   |   |
| 9       | 12     | 1       | 0 | 0 | 0 | 0 |   |   |   |   |   |   |   |   |   |   |
| 12      | 13     | 1       | 0 | 0 | 0 | 0 |   |   |   |   |   |   |   |   |   |   |
| 12      | 14     | 1       | 0 | 0 | 0 | 0 |   |   |   |   |   |   |   |   |   |   |
| 12      | 15     | 1       | 0 | 0 | 0 | 0 |   |   |   |   |   |   |   |   |   |   |
| 15      | 16     | 1       | 0 | 0 | 0 | 0 |   |   |   |   |   |   |   |   |   |   |
| 15      | 39     | 1       | 0 | 0 | 0 | 0 |   |   |   |   |   |   |   |   |   |   |
| 17      | 18     | 1       | 0 | 0 | 0 | 0 |   |   |   |   |   |   |   |   |   |   |
| 17      | 19     | 1       | 0 | 0 | 0 | 0 |   |   |   |   |   |   |   |   |   |   |
| 17      | 20     | 1       | 0 | 0 | 0 | 0 |   |   |   |   |   |   |   |   |   |   |
| 20      | 21     | 1       | 0 | 0 | 0 | 0 |   |   |   |   |   |   |   |   |   |   |
| 20      | 22     | 1       | 0 | 0 | 0 | 0 |   |   |   |   |   |   |   |   |   |   |
| 20      | 23     | 1       | 0 | 0 | 0 | 0 |   |   |   |   |   |   |   |   |   |   |
| 24      | 25     | 1       | 0 | 0 | 0 | 0 |   |   |   |   |   |   |   |   |   |   |
| 24      | 26     | 1       | 0 | 0 | 0 | 0 |   |   |   |   |   |   |   |   |   |   |
| 24      | 27     | 1       | 0 | 0 | 0 | 0 |   |   |   |   |   |   |   |   |   |   |
| 24      | 71     | 1       | 0 | 0 | 0 | 0 |   |   |   |   |   |   |   |   |   |   |
| 27      | 28     | 1       | 0 | 0 | 0 | 0 |   |   |   |   |   |   |   |   |   |   |
| 28      | 29     | 1       | 0 | 0 | 0 | 0 |   |   |   |   |   |   |   |   |   |   |
| 28      | 35     | 2       | 0 | 0 | 0 | 0 |   |   |   |   |   |   |   |   |   |   |
| 29      | 30     | 1       | 0 | 0 | 0 | 0 |   |   |   |   |   |   |   |   |   |   |
| 29      | 31     | 1       | 0 | 0 | 0 | 0 |   |   |   |   |   |   |   |   |   |   |
| 29      | 32     | 1       | 0 | 0 | 0 | 0 |   |   |   |   |   |   |   |   |   |   |
| 32      | 33     | 1       | 0 | 0 | 0 | 0 |   |   |   |   |   |   |   |   |   |   |
| 32      | 34     | 1       | 0 | 0 | 0 | 0 |   |   |   |   |   |   |   |   |   |   |

|     |     |   |   |   |   |   |
|-----|-----|---|---|---|---|---|
| 32  | 88  | 1 | 0 | 0 | 0 | 0 |
| 36  | 37  | 1 | 0 | 0 | 0 | 0 |
| 36  | 38  | 1 | 0 | 0 | 0 | 0 |
| 36  | 46  | 1 | 0 | 0 | 0 | 0 |
| 36  | 48  | 1 | 0 | 0 | 0 | 0 |
| 39  | 40  | 1 | 0 | 0 | 0 | 0 |
| 39  | 41  | 1 | 0 | 0 | 0 | 0 |
| 39  | 42  | 1 | 0 | 0 | 0 | 0 |
| 42  | 43  | 1 | 0 | 0 | 0 | 0 |
| 42  | 44  | 1 | 0 | 0 | 0 | 0 |
| 42  | 45  | 1 | 0 | 0 | 0 | 0 |
| 45  | 46  | 1 | 0 | 0 | 0 | 0 |
| 45  | 47  | 2 | 0 | 0 | 0 | 0 |
| 48  | 49  | 1 | 0 | 0 | 0 | 0 |
| 48  | 50  | 1 | 0 | 0 | 0 | 0 |
| 48  | 51  | 1 | 0 | 0 | 0 | 0 |
| 51  | 52  | 1 | 0 | 0 | 0 | 0 |
| 52  | 53  | 1 | 0 | 0 | 0 | 0 |
| 52  | 54  | 1 | 0 | 0 | 0 | 0 |
| 52  | 55  | 1 | 0 | 0 | 0 | 0 |
| 55  | 56  | 1 | 0 | 0 | 0 | 0 |
| 55  | 57  | 1 | 0 | 0 | 0 | 0 |
| 55  | 58  | 1 | 0 | 0 | 0 | 0 |
| 58  | 59  | 1 | 0 | 0 | 0 | 0 |
| 58  | 60  | 1 | 0 | 0 | 0 | 0 |
| 58  | 61  | 1 | 0 | 0 | 0 | 0 |
| 61  | 62  | 1 | 0 | 0 | 0 | 0 |
| 61  | 63  | 1 | 0 | 0 | 0 | 0 |
| 61  | 64  | 1 | 0 | 0 | 0 | 0 |
| 64  | 65  | 1 | 0 | 0 | 0 | 0 |
| 64  | 66  | 1 | 0 | 0 | 0 | 0 |
| 64  | 67  | 1 | 0 | 0 | 0 | 0 |
| 67  | 68  | 1 | 0 | 0 | 0 | 0 |
| 67  | 69  | 1 | 0 | 0 | 0 | 0 |
| 67  | 70  | 1 | 0 | 0 | 0 | 0 |
| 70  | 71  | 1 | 0 | 0 | 0 | 0 |
| 71  | 72  | 1 | 0 | 0 | 0 | 0 |
| 71  | 73  | 1 | 0 | 0 | 0 | 0 |
| 74  | 75  | 1 | 0 | 0 | 0 | 0 |
| 74  | 76  | 1 | 0 | 0 | 0 | 0 |
| 74  | 77  | 1 | 0 | 0 | 0 | 0 |
| 74  | 78  | 1 | 0 | 0 | 0 | 0 |
| 78  | 79  | 1 | 0 | 0 | 0 | 0 |
| 78  | 80  | 1 | 0 | 0 | 0 | 0 |
| 78  | 81  | 1 | 0 | 0 | 0 | 0 |
| 81  | 82  | 1 | 0 | 0 | 0 | 0 |
| 81  | 89  | 1 | 0 | 0 | 0 | 0 |
| 82  | 83  | 1 | 0 | 0 | 0 | 0 |
| 82  | 84  | 1 | 0 | 0 | 0 | 0 |
| 82  | 85  | 1 | 0 | 0 | 0 | 0 |
| 85  | 86  | 1 | 0 | 0 | 0 | 0 |
| 85  | 87  | 1 | 0 | 0 | 0 | 0 |
| 85  | 88  | 1 | 0 | 0 | 0 | 0 |
| 88  | 111 | 1 | 0 | 0 | 0 | 0 |
| 89  | 90  | 1 | 0 | 0 | 0 | 0 |
| 89  | 91  | 1 | 0 | 0 | 0 | 0 |
| 89  | 92  | 1 | 0 | 0 | 0 | 0 |
| 92  | 93  | 1 | 0 | 0 | 0 | 0 |
| 92  | 94  | 1 | 0 | 0 | 0 | 0 |
| 92  | 95  | 1 | 0 | 0 | 0 | 0 |
| 96  | 97  | 1 | 0 | 0 | 0 | 0 |
| 96  | 98  | 1 | 0 | 0 | 0 | 0 |
| 96  | 99  | 1 | 0 | 0 | 0 | 0 |
| 96  | 143 | 1 | 0 | 0 | 0 | 0 |
| 99  | 100 | 1 | 0 | 0 | 0 | 0 |
| 100 | 101 | 1 | 0 | 0 | 0 | 0 |
| 100 | 107 | 2 | 0 | 0 | 0 | 0 |
| 101 | 102 | 1 | 0 | 0 | 0 | 0 |
| 101 | 103 | 1 | 0 | 0 | 0 | 0 |
| 101 | 104 | 1 | 0 | 0 | 0 | 0 |
| 104 | 105 | 1 | 0 | 0 | 0 | 0 |
| 104 | 106 | 1 | 0 | 0 | 0 | 0 |
| 104 | 160 | 1 | 0 | 0 | 0 | 0 |
| 108 | 109 | 1 | 0 | 0 | 0 | 0 |
| 108 | 110 | 1 | 0 | 0 | 0 | 0 |
| 108 | 118 | 1 | 0 | 0 | 0 | 0 |
| 108 | 120 | 1 | 0 | 0 | 0 | 0 |
| 111 | 112 | 1 | 0 | 0 | 0 | 0 |
| 111 | 113 | 1 | 0 | 0 | 0 | 0 |
| 111 | 114 | 1 | 0 | 0 | 0 | 0 |
| 114 | 115 | 1 | 0 | 0 | 0 | 0 |

|        |   |   |   |   |   |
|--------|---|---|---|---|---|
| 114116 | 1 | 0 | 0 | 0 | 0 |
| 114117 | 1 | 0 | 0 | 0 | 0 |
| 117118 | 1 | 0 | 0 | 0 | 0 |
| 117119 | 2 | 0 | 0 | 0 | 0 |
| 120121 | 1 | 0 | 0 | 0 | 0 |
| 120122 | 1 | 0 | 0 | 0 | 0 |
| 120123 | 1 | 0 | 0 | 0 | 0 |
| 123124 | 1 | 0 | 0 | 0 | 0 |
| 124125 | 1 | 0 | 0 | 0 | 0 |
| 124126 | 1 | 0 | 0 | 0 | 0 |
| 124127 | 1 | 0 | 0 | 0 | 0 |
| 127128 | 1 | 0 | 0 | 0 | 0 |
| 127129 | 1 | 0 | 0 | 0 | 0 |
| 127130 | 1 | 0 | 0 | 0 | 0 |
| 130131 | 1 | 0 | 0 | 0 | 0 |
| 130132 | 1 | 0 | 0 | 0 | 0 |
| 130133 | 1 | 0 | 0 | 0 | 0 |
| 133134 | 1 | 0 | 0 | 0 | 0 |
| 133135 | 1 | 0 | 0 | 0 | 0 |
| 133136 | 1 | 0 | 0 | 0 | 0 |
| 136137 | 1 | 0 | 0 | 0 | 0 |
| 136138 | 1 | 0 | 0 | 0 | 0 |
| 136139 | 1 | 0 | 0 | 0 | 0 |
| 139140 | 1 | 0 | 0 | 0 | 0 |
| 139141 | 1 | 0 | 0 | 0 | 0 |
| 139142 | 1 | 0 | 0 | 0 | 0 |
| 142143 | 1 | 0 | 0 | 0 | 0 |
| 143144 | 1 | 0 | 0 | 0 | 0 |
| 143145 | 1 | 0 | 0 | 0 | 0 |
| 146147 | 1 | 0 | 0 | 0 | 0 |
| 146148 | 1 | 0 | 0 | 0 | 0 |
| 146149 | 1 | 0 | 0 | 0 | 0 |
| 146150 | 1 | 0 | 0 | 0 | 0 |
| 150151 | 1 | 0 | 0 | 0 | 0 |
| 150152 | 1 | 0 | 0 | 0 | 0 |
| 150153 | 1 | 0 | 0 | 0 | 0 |
| 153154 | 1 | 0 | 0 | 0 | 0 |
| 153161 | 1 | 0 | 0 | 0 | 0 |
| 154155 | 1 | 0 | 0 | 0 | 0 |
| 154156 | 1 | 0 | 0 | 0 | 0 |
| 154157 | 1 | 0 | 0 | 0 | 0 |
| 157158 | 1 | 0 | 0 | 0 | 0 |
| 157159 | 1 | 0 | 0 | 0 | 0 |
| 157160 | 1 | 0 | 0 | 0 | 0 |
| 160183 | 1 | 0 | 0 | 0 | 0 |
| 161162 | 1 | 0 | 0 | 0 | 0 |
| 161163 | 1 | 0 | 0 | 0 | 0 |
| 161164 | 1 | 0 | 0 | 0 | 0 |
| 164165 | 1 | 0 | 0 | 0 | 0 |
| 164166 | 1 | 0 | 0 | 0 | 0 |
| 164167 | 1 | 0 | 0 | 0 | 0 |
| 168169 | 1 | 0 | 0 | 0 | 0 |
| 168170 | 1 | 0 | 0 | 0 | 0 |
| 168171 | 1 | 0 | 0 | 0 | 0 |
| 168215 | 1 | 0 | 0 | 0 | 0 |
| 171172 | 1 | 0 | 0 | 0 | 0 |
| 172173 | 1 | 0 | 0 | 0 | 0 |
| 172179 | 2 | 0 | 0 | 0 | 0 |
| 173174 | 1 | 0 | 0 | 0 | 0 |
| 173175 | 1 | 0 | 0 | 0 | 0 |
| 173176 | 1 | 0 | 0 | 0 | 0 |
| 176177 | 1 | 0 | 0 | 0 | 0 |
| 176178 | 1 | 0 | 0 | 0 | 0 |
| 176232 | 1 | 0 | 0 | 0 | 0 |
| 180181 | 1 | 0 | 0 | 0 | 0 |
| 180182 | 1 | 0 | 0 | 0 | 0 |
| 180190 | 1 | 0 | 0 | 0 | 0 |
| 180192 | 1 | 0 | 0 | 0 | 0 |
| 183184 | 1 | 0 | 0 | 0 | 0 |
| 183185 | 1 | 0 | 0 | 0 | 0 |
| 183186 | 1 | 0 | 0 | 0 | 0 |
| 186187 | 1 | 0 | 0 | 0 | 0 |
| 186188 | 1 | 0 | 0 | 0 | 0 |
| 186189 | 1 | 0 | 0 | 0 | 0 |
| 189190 | 1 | 0 | 0 | 0 | 0 |
| 189191 | 2 | 0 | 0 | 0 | 0 |
| 192193 | 1 | 0 | 0 | 0 | 0 |
| 192194 | 1 | 0 | 0 | 0 | 0 |
| 192195 | 1 | 0 | 0 | 0 | 0 |
| 195196 | 1 | 0 | 0 | 0 | 0 |
| 196197 | 1 | 0 | 0 | 0 | 0 |

|        |   |   |   |   |   |
|--------|---|---|---|---|---|
| 196198 | 1 | 0 | 0 | 0 | 0 |
| 196199 | 1 | 0 | 0 | 0 | 0 |
| 199200 | 1 | 0 | 0 | 0 | 0 |
| 199201 | 1 | 0 | 0 | 0 | 0 |
| 199202 | 1 | 0 | 0 | 0 | 0 |
| 202203 | 1 | 0 | 0 | 0 | 0 |
| 202204 | 1 | 0 | 0 | 0 | 0 |
| 202205 | 1 | 0 | 0 | 0 | 0 |
| 205206 | 1 | 0 | 0 | 0 | 0 |
| 205207 | 1 | 0 | 0 | 0 | 0 |
| 205208 | 1 | 0 | 0 | 0 | 0 |
| 208209 | 1 | 0 | 0 | 0 | 0 |
| 208210 | 1 | 0 | 0 | 0 | 0 |
| 208211 | 1 | 0 | 0 | 0 | 0 |
| 211212 | 1 | 0 | 0 | 0 | 0 |
| 211213 | 1 | 0 | 0 | 0 | 0 |
| 211214 | 1 | 0 | 0 | 0 | 0 |
| 214215 | 1 | 0 | 0 | 0 | 0 |
| 215216 | 1 | 0 | 0 | 0 | 0 |
| 215217 | 1 | 0 | 0 | 0 | 0 |
| 218219 | 1 | 0 | 0 | 0 | 0 |
| 218220 | 1 | 0 | 0 | 0 | 0 |
| 218221 | 1 | 0 | 0 | 0 | 0 |
| 218222 | 1 | 0 | 0 | 0 | 0 |
| 222223 | 1 | 0 | 0 | 0 | 0 |
| 222224 | 1 | 0 | 0 | 0 | 0 |
| 222225 | 1 | 0 | 0 | 0 | 0 |
| 225226 | 1 | 0 | 0 | 0 | 0 |
| 225233 | 1 | 0 | 0 | 0 | 0 |
| 226227 | 1 | 0 | 0 | 0 | 0 |
| 226228 | 1 | 0 | 0 | 0 | 0 |
| 226229 | 1 | 0 | 0 | 0 | 0 |
| 229230 | 1 | 0 | 0 | 0 | 0 |
| 229231 | 1 | 0 | 0 | 0 | 0 |
| 229232 | 1 | 0 | 0 | 0 | 0 |
| 232255 | 1 | 0 | 0 | 0 | 0 |
| 233234 | 1 | 0 | 0 | 0 | 0 |
| 233235 | 1 | 0 | 0 | 0 | 0 |
| 233236 | 1 | 0 | 0 | 0 | 0 |
| 236237 | 1 | 0 | 0 | 0 | 0 |
| 236238 | 1 | 0 | 0 | 0 | 0 |
| 236239 | 1 | 0 | 0 | 0 | 0 |
| 240241 | 1 | 0 | 0 | 0 | 0 |
| 240242 | 1 | 0 | 0 | 0 | 0 |
| 240243 | 1 | 0 | 0 | 0 | 0 |
| 240287 | 1 | 0 | 0 | 0 | 0 |
| 243244 | 1 | 0 | 0 | 0 | 0 |
| 244245 | 1 | 0 | 0 | 0 | 0 |
| 244251 | 2 | 0 | 0 | 0 | 0 |
| 245246 | 1 | 0 | 0 | 0 | 0 |
| 245247 | 1 | 0 | 0 | 0 | 0 |
| 245248 | 1 | 0 | 0 | 0 | 0 |
| 248249 | 1 | 0 | 0 | 0 | 0 |
| 248250 | 1 | 0 | 0 | 0 | 0 |
| 248304 | 1 | 0 | 0 | 0 | 0 |
| 252253 | 1 | 0 | 0 | 0 | 0 |
| 252254 | 1 | 0 | 0 | 0 | 0 |
| 252262 | 1 | 0 | 0 | 0 | 0 |
| 252264 | 1 | 0 | 0 | 0 | 0 |
| 255256 | 1 | 0 | 0 | 0 | 0 |
| 255257 | 1 | 0 | 0 | 0 | 0 |
| 255258 | 1 | 0 | 0 | 0 | 0 |
| 258259 | 1 | 0 | 0 | 0 | 0 |
| 258260 | 1 | 0 | 0 | 0 | 0 |
| 258261 | 1 | 0 | 0 | 0 | 0 |
| 261262 | 1 | 0 | 0 | 0 | 0 |
| 261263 | 2 | 0 | 0 | 0 | 0 |
| 264265 | 1 | 0 | 0 | 0 | 0 |
| 264266 | 1 | 0 | 0 | 0 | 0 |
| 264267 | 1 | 0 | 0 | 0 | 0 |
| 267268 | 1 | 0 | 0 | 0 | 0 |
| 268269 | 1 | 0 | 0 | 0 | 0 |
| 268270 | 1 | 0 | 0 | 0 | 0 |
| 268271 | 1 | 0 | 0 | 0 | 0 |
| 271272 | 1 | 0 | 0 | 0 | 0 |
| 271273 | 1 | 0 | 0 | 0 | 0 |
| 271274 | 1 | 0 | 0 | 0 | 0 |
| 274275 | 1 | 0 | 0 | 0 | 0 |
| 274276 | 1 | 0 | 0 | 0 | 0 |
| 274277 | 1 | 0 | 0 | 0 | 0 |
| 277278 | 1 | 0 | 0 | 0 | 0 |

|        |   |   |   |   |   |
|--------|---|---|---|---|---|
| 277279 | 1 | 0 | 0 | 0 | 0 |
| 277280 | 1 | 0 | 0 | 0 | 0 |
| 280281 | 1 | 0 | 0 | 0 | 0 |
| 280282 | 1 | 0 | 0 | 0 | 0 |
| 280283 | 1 | 0 | 0 | 0 | 0 |
| 283284 | 1 | 0 | 0 | 0 | 0 |
| 283285 | 1 | 0 | 0 | 0 | 0 |
| 283286 | 1 | 0 | 0 | 0 | 0 |
| 286287 | 1 | 0 | 0 | 0 | 0 |
| 287288 | 1 | 0 | 0 | 0 | 0 |
| 287289 | 1 | 0 | 0 | 0 | 0 |
| 290291 | 1 | 0 | 0 | 0 | 0 |
| 290292 | 1 | 0 | 0 | 0 | 0 |
| 290293 | 1 | 0 | 0 | 0 | 0 |
| 290294 | 1 | 0 | 0 | 0 | 0 |
| 294295 | 1 | 0 | 0 | 0 | 0 |
| 294296 | 1 | 0 | 0 | 0 | 0 |
| 294297 | 1 | 0 | 0 | 0 | 0 |
| 297298 | 1 | 0 | 0 | 0 | 0 |
| 297305 | 1 | 0 | 0 | 0 | 0 |
| 298299 | 1 | 0 | 0 | 0 | 0 |
| 298300 | 1 | 0 | 0 | 0 | 0 |
| 298301 | 1 | 0 | 0 | 0 | 0 |
| 301302 | 1 | 0 | 0 | 0 | 0 |
| 301303 | 1 | 0 | 0 | 0 | 0 |
| 301304 | 1 | 0 | 0 | 0 | 0 |
| 304327 | 1 | 0 | 0 | 0 | 0 |
| 305306 | 1 | 0 | 0 | 0 | 0 |
| 305307 | 1 | 0 | 0 | 0 | 0 |
| 305308 | 1 | 0 | 0 | 0 | 0 |
| 308309 | 1 | 0 | 0 | 0 | 0 |
| 308310 | 1 | 0 | 0 | 0 | 0 |
| 308311 | 1 | 0 | 0 | 0 | 0 |
| 312313 | 1 | 0 | 0 | 0 | 0 |
| 312314 | 1 | 0 | 0 | 0 | 0 |
| 312315 | 1 | 0 | 0 | 0 | 0 |
| 312359 | 1 | 0 | 0 | 0 | 0 |
| 315316 | 1 | 0 | 0 | 0 | 0 |
| 316317 | 1 | 0 | 0 | 0 | 0 |
| 316323 | 2 | 0 | 0 | 0 | 0 |
| 317318 | 1 | 0 | 0 | 0 | 0 |
| 317319 | 1 | 0 | 0 | 0 | 0 |
| 317320 | 1 | 0 | 0 | 0 | 0 |
| 320321 | 1 | 0 | 0 | 0 | 0 |
| 320322 | 1 | 0 | 0 | 0 | 0 |
| 320376 | 1 | 0 | 0 | 0 | 0 |
| 324325 | 1 | 0 | 0 | 0 | 0 |
| 324326 | 1 | 0 | 0 | 0 | 0 |
| 324334 | 1 | 0 | 0 | 0 | 0 |
| 324336 | 1 | 0 | 0 | 0 | 0 |
| 327328 | 1 | 0 | 0 | 0 | 0 |
| 327329 | 1 | 0 | 0 | 0 | 0 |
| 327330 | 1 | 0 | 0 | 0 | 0 |
| 330331 | 1 | 0 | 0 | 0 | 0 |
| 330332 | 1 | 0 | 0 | 0 | 0 |
| 330333 | 1 | 0 | 0 | 0 | 0 |
| 333334 | 1 | 0 | 0 | 0 | 0 |
| 333335 | 2 | 0 | 0 | 0 | 0 |
| 336337 | 1 | 0 | 0 | 0 | 0 |
| 336338 | 1 | 0 | 0 | 0 | 0 |
| 336339 | 1 | 0 | 0 | 0 | 0 |
| 339340 | 1 | 0 | 0 | 0 | 0 |
| 340341 | 1 | 0 | 0 | 0 | 0 |
| 340342 | 1 | 0 | 0 | 0 | 0 |
| 340343 | 1 | 0 | 0 | 0 | 0 |
| 343344 | 1 | 0 | 0 | 0 | 0 |
| 343345 | 1 | 0 | 0 | 0 | 0 |
| 343346 | 1 | 0 | 0 | 0 | 0 |
| 346347 | 1 | 0 | 0 | 0 | 0 |
| 346348 | 1 | 0 | 0 | 0 | 0 |
| 346349 | 1 | 0 | 0 | 0 | 0 |
| 349350 | 1 | 0 | 0 | 0 | 0 |
| 349351 | 1 | 0 | 0 | 0 | 0 |
| 349352 | 1 | 0 | 0 | 0 | 0 |
| 352353 | 1 | 0 | 0 | 0 | 0 |
| 352354 | 1 | 0 | 0 | 0 | 0 |
| 352355 | 1 | 0 | 0 | 0 | 0 |
| 355356 | 1 | 0 | 0 | 0 | 0 |
| 355357 | 1 | 0 | 0 | 0 | 0 |
| 355358 | 1 | 0 | 0 | 0 | 0 |
| 358359 | 1 | 0 | 0 | 0 | 0 |













|    |    |   |   |   |   |   |
|----|----|---|---|---|---|---|
| 6  | 8  | 1 | 0 | 0 | 0 | 0 |
| 6  | 9  | 1 | 0 | 0 | 0 | 0 |
| 9  | 10 | 1 | 0 | 0 | 0 | 0 |
| 9  | 11 | 1 | 0 | 0 | 0 | 0 |
| 9  | 12 | 1 | 0 | 0 | 0 | 0 |
| 12 | 13 | 1 | 0 | 0 | 0 | 0 |
| 12 | 14 | 1 | 0 | 0 | 0 | 0 |
| 12 | 19 | 1 | 0 | 0 | 0 | 0 |
| 15 | 16 | 1 | 0 | 0 | 0 | 0 |
| 15 | 17 | 1 | 0 | 0 | 0 | 0 |
| 15 | 18 | 1 | 0 | 0 | 0 | 0 |
| 19 | 20 | 1 | 0 | 0 | 0 | 0 |
| 19 | 36 | 1 | 0 | 0 | 0 | 0 |
| 21 | 22 | 1 | 0 | 0 | 0 | 0 |
| 21 | 23 | 1 | 0 | 0 | 0 | 0 |
| 21 | 24 | 1 | 0 | 0 | 0 | 0 |
| 21 | 68 | 1 | 0 | 0 | 0 | 0 |
| 24 | 25 | 1 | 0 | 0 | 0 | 0 |
| 25 | 26 | 1 | 0 | 0 | 0 | 0 |
| 25 | 32 | 2 | 0 | 0 | 0 | 0 |
| 26 | 27 | 1 | 0 | 0 | 0 | 0 |
| 26 | 28 | 1 | 0 | 0 | 0 | 0 |
| 26 | 29 | 1 | 0 | 0 | 0 | 0 |
| 29 | 30 | 1 | 0 | 0 | 0 | 0 |
| 29 | 31 | 1 | 0 | 0 | 0 | 0 |
| 29 | 89 | 1 | 0 | 0 | 0 | 0 |
| 33 | 34 | 1 | 0 | 0 | 0 | 0 |
| 33 | 35 | 1 | 0 | 0 | 0 | 0 |
| 33 | 43 | 1 | 0 | 0 | 0 | 0 |
| 33 | 45 | 1 | 0 | 0 | 0 | 0 |
| 36 | 37 | 1 | 0 | 0 | 0 | 0 |
| 36 | 38 | 1 | 0 | 0 | 0 | 0 |
| 36 | 39 | 1 | 0 | 0 | 0 | 0 |
| 39 | 40 | 1 | 0 | 0 | 0 | 0 |
| 39 | 41 | 1 | 0 | 0 | 0 | 0 |
| 39 | 42 | 1 | 0 | 0 | 0 | 0 |
| 42 | 43 | 1 | 0 | 0 | 0 | 0 |
| 42 | 44 | 2 | 0 | 0 | 0 | 0 |
| 45 | 46 | 1 | 0 | 0 | 0 | 0 |
| 45 | 47 | 1 | 0 | 0 | 0 | 0 |
| 45 | 48 | 1 | 0 | 0 | 0 | 0 |
| 48 | 49 | 1 | 0 | 0 | 0 | 0 |
| 49 | 50 | 1 | 0 | 0 | 0 | 0 |
| 49 | 51 | 1 | 0 | 0 | 0 | 0 |
| 49 | 52 | 1 | 0 | 0 | 0 | 0 |
| 52 | 53 | 1 | 0 | 0 | 0 | 0 |
| 52 | 54 | 1 | 0 | 0 | 0 | 0 |
| 52 | 55 | 1 | 0 | 0 | 0 | 0 |
| 55 | 56 | 1 | 0 | 0 | 0 | 0 |
| 55 | 57 | 1 | 0 | 0 | 0 | 0 |
| 55 | 58 | 1 | 0 | 0 | 0 | 0 |
| 58 | 59 | 1 | 0 | 0 | 0 | 0 |
| 58 | 60 | 1 | 0 | 0 | 0 | 0 |
| 58 | 61 | 1 | 0 | 0 | 0 | 0 |
| 61 | 62 | 1 | 0 | 0 | 0 | 0 |
| 61 | 63 | 1 | 0 | 0 | 0 | 0 |
| 61 | 64 | 1 | 0 | 0 | 0 | 0 |
| 64 | 65 | 1 | 0 | 0 | 0 | 0 |
| 64 | 66 | 1 | 0 | 0 | 0 | 0 |
| 64 | 67 | 1 | 0 | 0 | 0 | 0 |
| 67 | 68 | 1 | 0 | 0 | 0 | 0 |
| 68 | 69 | 1 | 0 | 0 | 0 | 0 |
| 68 | 70 | 1 | 0 | 0 | 0 | 0 |
| 71 | 72 | 1 | 0 | 0 | 0 | 0 |
| 71 | 73 | 1 | 0 | 0 | 0 | 0 |
| 71 | 74 | 1 | 0 | 0 | 0 | 0 |
| 71 | 75 | 1 | 0 | 0 | 0 | 0 |
| 75 | 76 | 1 | 0 | 0 | 0 | 0 |
| 75 | 85 | 1 | 0 | 0 | 0 | 0 |
| 76 | 77 | 1 | 0 | 0 | 0 | 0 |
| 76 | 78 | 1 | 0 | 0 | 0 | 0 |
| 76 | 79 | 1 | 0 | 0 | 0 | 0 |
| 79 | 80 | 1 | 0 | 0 | 0 | 0 |
| 79 | 81 | 1 | 0 | 0 | 0 | 0 |
| 79 | 82 | 1 | 0 | 0 | 0 | 0 |
| 82 | 83 | 1 | 0 | 0 | 0 | 0 |
| 82 | 84 | 1 | 0 | 0 | 0 | 0 |
| 82 | 89 | 1 | 0 | 0 | 0 | 0 |
| 85 | 86 | 1 | 0 | 0 | 0 | 0 |
| 85 | 87 | 1 | 0 | 0 | 0 | 0 |
| 85 | 88 | 1 | 0 | 0 | 0 | 0 |

|        |   |   |   |   |   |
|--------|---|---|---|---|---|
| 89105  | 1 | 0 | 0 | 0 | 0 |
| 90 91  | 1 | 0 | 0 | 0 | 0 |
| 90 92  | 1 | 0 | 0 | 0 | 0 |
| 90 93  | 1 | 0 | 0 | 0 | 0 |
| 90137  | 1 | 0 | 0 | 0 | 0 |
| 93 94  | 1 | 0 | 0 | 0 | 0 |
| 94 95  | 1 | 0 | 0 | 0 | 0 |
| 94101  | 2 | 0 | 0 | 0 | 0 |
| 95 96  | 1 | 0 | 0 | 0 | 0 |
| 95 97  | 1 | 0 | 0 | 0 | 0 |
| 95 98  | 1 | 0 | 0 | 0 | 0 |
| 98 99  | 1 | 0 | 0 | 0 | 0 |
| 98100  | 1 | 0 | 0 | 0 | 0 |
| 98158  | 1 | 0 | 0 | 0 | 0 |
| 102103 | 1 | 0 | 0 | 0 | 0 |
| 102104 | 1 | 0 | 0 | 0 | 0 |
| 102112 | 1 | 0 | 0 | 0 | 0 |
| 102114 | 1 | 0 | 0 | 0 | 0 |
| 105106 | 1 | 0 | 0 | 0 | 0 |
| 105107 | 1 | 0 | 0 | 0 | 0 |
| 105108 | 1 | 0 | 0 | 0 | 0 |
| 108109 | 1 | 0 | 0 | 0 | 0 |
| 108110 | 1 | 0 | 0 | 0 | 0 |
| 108111 | 1 | 0 | 0 | 0 | 0 |
| 111112 | 1 | 0 | 0 | 0 | 0 |
| 111113 | 2 | 0 | 0 | 0 | 0 |
| 114115 | 1 | 0 | 0 | 0 | 0 |
| 114116 | 1 | 0 | 0 | 0 | 0 |
| 114117 | 1 | 0 | 0 | 0 | 0 |
| 117118 | 1 | 0 | 0 | 0 | 0 |
| 118119 | 1 | 0 | 0 | 0 | 0 |
| 118120 | 1 | 0 | 0 | 0 | 0 |
| 118121 | 1 | 0 | 0 | 0 | 0 |
| 121122 | 1 | 0 | 0 | 0 | 0 |
| 121123 | 1 | 0 | 0 | 0 | 0 |
| 121124 | 1 | 0 | 0 | 0 | 0 |
| 124125 | 1 | 0 | 0 | 0 | 0 |
| 124126 | 1 | 0 | 0 | 0 | 0 |
| 124127 | 1 | 0 | 0 | 0 | 0 |
| 127128 | 1 | 0 | 0 | 0 | 0 |
| 127129 | 1 | 0 | 0 | 0 | 0 |
| 127130 | 1 | 0 | 0 | 0 | 0 |
| 130131 | 1 | 0 | 0 | 0 | 0 |
| 130132 | 1 | 0 | 0 | 0 | 0 |
| 130133 | 1 | 0 | 0 | 0 | 0 |
| 133134 | 1 | 0 | 0 | 0 | 0 |
| 133135 | 1 | 0 | 0 | 0 | 0 |
| 133136 | 1 | 0 | 0 | 0 | 0 |
| 136137 | 1 | 0 | 0 | 0 | 0 |
| 137138 | 1 | 0 | 0 | 0 | 0 |
| 137139 | 1 | 0 | 0 | 0 | 0 |
| 140141 | 1 | 0 | 0 | 0 | 0 |
| 140142 | 1 | 0 | 0 | 0 | 0 |
| 140143 | 1 | 0 | 0 | 0 | 0 |
| 140144 | 1 | 0 | 0 | 0 | 0 |
| 144145 | 1 | 0 | 0 | 0 | 0 |
| 144154 | 1 | 0 | 0 | 0 | 0 |
| 145146 | 1 | 0 | 0 | 0 | 0 |
| 145147 | 1 | 0 | 0 | 0 | 0 |
| 145148 | 1 | 0 | 0 | 0 | 0 |
| 148149 | 1 | 0 | 0 | 0 | 0 |
| 148150 | 1 | 0 | 0 | 0 | 0 |
| 148151 | 1 | 0 | 0 | 0 | 0 |
| 151152 | 1 | 0 | 0 | 0 | 0 |
| 151153 | 1 | 0 | 0 | 0 | 0 |
| 151158 | 1 | 0 | 0 | 0 | 0 |
| 154155 | 1 | 0 | 0 | 0 | 0 |
| 154156 | 1 | 0 | 0 | 0 | 0 |
| 154157 | 1 | 0 | 0 | 0 | 0 |
| 158174 | 1 | 0 | 0 | 0 | 0 |
| 159160 | 1 | 0 | 0 | 0 | 0 |
| 159161 | 1 | 0 | 0 | 0 | 0 |
| 159162 | 1 | 0 | 0 | 0 | 0 |
| 159206 | 1 | 0 | 0 | 0 | 0 |
| 162163 | 1 | 0 | 0 | 0 | 0 |
| 163164 | 1 | 0 | 0 | 0 | 0 |
| 163170 | 2 | 0 | 0 | 0 | 0 |
| 164165 | 1 | 0 | 0 | 0 | 0 |
| 164166 | 1 | 0 | 0 | 0 | 0 |
| 164167 | 1 | 0 | 0 | 0 | 0 |
| 167168 | 1 | 0 | 0 | 0 | 0 |

|        |   |   |   |   |   |
|--------|---|---|---|---|---|
| 167169 | 1 | 0 | 0 | 0 | 0 |
| 167226 | 1 | 0 | 0 | 0 | 0 |
| 171172 | 1 | 0 | 0 | 0 | 0 |
| 171173 | 1 | 0 | 0 | 0 | 0 |
| 171181 | 1 | 0 | 0 | 0 | 0 |
| 171183 | 1 | 0 | 0 | 0 | 0 |
| 174175 | 1 | 0 | 0 | 0 | 0 |
| 174176 | 1 | 0 | 0 | 0 | 0 |
| 174177 | 1 | 0 | 0 | 0 | 0 |
| 177178 | 1 | 0 | 0 | 0 | 0 |
| 177179 | 1 | 0 | 0 | 0 | 0 |
| 177180 | 1 | 0 | 0 | 0 | 0 |
| 180181 | 1 | 0 | 0 | 0 | 0 |
| 180182 | 2 | 0 | 0 | 0 | 0 |
| 183184 | 1 | 0 | 0 | 0 | 0 |
| 183185 | 1 | 0 | 0 | 0 | 0 |
| 183186 | 1 | 0 | 0 | 0 | 0 |
| 186187 | 1 | 0 | 0 | 0 | 0 |
| 187188 | 1 | 0 | 0 | 0 | 0 |
| 187189 | 1 | 0 | 0 | 0 | 0 |
| 187190 | 1 | 0 | 0 | 0 | 0 |
| 190191 | 1 | 0 | 0 | 0 | 0 |
| 190192 | 1 | 0 | 0 | 0 | 0 |
| 190193 | 1 | 0 | 0 | 0 | 0 |
| 193194 | 1 | 0 | 0 | 0 | 0 |
| 193195 | 1 | 0 | 0 | 0 | 0 |
| 193196 | 1 | 0 | 0 | 0 | 0 |
| 196197 | 1 | 0 | 0 | 0 | 0 |
| 196198 | 1 | 0 | 0 | 0 | 0 |
| 196199 | 1 | 0 | 0 | 0 | 0 |
| 199200 | 1 | 0 | 0 | 0 | 0 |
| 199201 | 1 | 0 | 0 | 0 | 0 |
| 199202 | 1 | 0 | 0 | 0 | 0 |
| 202203 | 1 | 0 | 0 | 0 | 0 |
| 202204 | 1 | 0 | 0 | 0 | 0 |
| 202205 | 1 | 0 | 0 | 0 | 0 |
| 205206 | 1 | 0 | 0 | 0 | 0 |
| 206207 | 1 | 0 | 0 | 0 | 0 |
| 206208 | 1 | 0 | 0 | 0 | 0 |
| 209210 | 1 | 0 | 0 | 0 | 0 |
| 209211 | 1 | 0 | 0 | 0 | 0 |
| 209212 | 1 | 0 | 0 | 0 | 0 |
| 209213 | 1 | 0 | 0 | 0 | 0 |
| 213214 | 1 | 0 | 0 | 0 | 0 |
| 213223 | 1 | 0 | 0 | 0 | 0 |
| 214215 | 1 | 0 | 0 | 0 | 0 |
| 214216 | 1 | 0 | 0 | 0 | 0 |
| 214217 | 1 | 0 | 0 | 0 | 0 |
| 217218 | 1 | 0 | 0 | 0 | 0 |
| 217219 | 1 | 0 | 0 | 0 | 0 |
| 217220 | 1 | 0 | 0 | 0 | 0 |
| 220221 | 1 | 0 | 0 | 0 | 0 |
| 220222 | 1 | 0 | 0 | 0 | 0 |
| 220226 | 1 | 0 | 0 | 0 | 0 |
| 223224 | 1 | 0 | 0 | 0 | 0 |
| 223225 | 1 | 0 | 0 | 0 | 0 |
| 226242 | 1 | 0 | 0 | 0 | 0 |
| 227228 | 1 | 0 | 0 | 0 | 0 |
| 227229 | 1 | 0 | 0 | 0 | 0 |
| 227230 | 1 | 0 | 0 | 0 | 0 |
| 227274 | 1 | 0 | 0 | 0 | 0 |
| 230231 | 1 | 0 | 0 | 0 | 0 |
| 231232 | 1 | 0 | 0 | 0 | 0 |
| 231238 | 2 | 0 | 0 | 0 | 0 |
| 232233 | 1 | 0 | 0 | 0 | 0 |
| 232234 | 1 | 0 | 0 | 0 | 0 |
| 232235 | 1 | 0 | 0 | 0 | 0 |
| 235236 | 1 | 0 | 0 | 0 | 0 |
| 235237 | 1 | 0 | 0 | 0 | 0 |
| 235295 | 1 | 0 | 0 | 0 | 0 |
| 239240 | 1 | 0 | 0 | 0 | 0 |
| 239241 | 1 | 0 | 0 | 0 | 0 |
| 239249 | 1 | 0 | 0 | 0 | 0 |
| 239251 | 1 | 0 | 0 | 0 | 0 |
| 242243 | 1 | 0 | 0 | 0 | 0 |
| 242244 | 1 | 0 | 0 | 0 | 0 |
| 242245 | 1 | 0 | 0 | 0 | 0 |
| 245246 | 1 | 0 | 0 | 0 | 0 |
| 245247 | 1 | 0 | 0 | 0 | 0 |
| 245248 | 1 | 0 | 0 | 0 | 0 |
| 248249 | 1 | 0 | 0 | 0 | 0 |

|        |   |   |   |   |   |
|--------|---|---|---|---|---|
| 248250 | 2 | 0 | 0 | 0 | 0 |
| 251252 | 1 | 0 | 0 | 0 | 0 |
| 251253 | 1 | 0 | 0 | 0 | 0 |
| 251254 | 1 | 0 | 0 | 0 | 0 |
| 254255 | 1 | 0 | 0 | 0 | 0 |
| 255256 | 1 | 0 | 0 | 0 | 0 |
| 255257 | 1 | 0 | 0 | 0 | 0 |
| 255258 | 1 | 0 | 0 | 0 | 0 |
| 258259 | 1 | 0 | 0 | 0 | 0 |
| 258260 | 1 | 0 | 0 | 0 | 0 |
| 258261 | 1 | 0 | 0 | 0 | 0 |
| 261262 | 1 | 0 | 0 | 0 | 0 |
| 261263 | 1 | 0 | 0 | 0 | 0 |
| 261264 | 1 | 0 | 0 | 0 | 0 |
| 264265 | 1 | 0 | 0 | 0 | 0 |
| 264266 | 1 | 0 | 0 | 0 | 0 |
| 264267 | 1 | 0 | 0 | 0 | 0 |
| 267268 | 1 | 0 | 0 | 0 | 0 |
| 267269 | 1 | 0 | 0 | 0 | 0 |
| 267270 | 1 | 0 | 0 | 0 | 0 |
| 270271 | 1 | 0 | 0 | 0 | 0 |
| 270272 | 1 | 0 | 0 | 0 | 0 |
| 270273 | 1 | 0 | 0 | 0 | 0 |
| 273274 | 1 | 0 | 0 | 0 | 0 |
| 274275 | 1 | 0 | 0 | 0 | 0 |
| 274276 | 1 | 0 | 0 | 0 | 0 |
| 277278 | 1 | 0 | 0 | 0 | 0 |
| 277279 | 1 | 0 | 0 | 0 | 0 |
| 277280 | 1 | 0 | 0 | 0 | 0 |
| 277281 | 1 | 0 | 0 | 0 | 0 |
| 281282 | 1 | 0 | 0 | 0 | 0 |
| 281291 | 1 | 0 | 0 | 0 | 0 |
| 282283 | 1 | 0 | 0 | 0 | 0 |
| 282284 | 1 | 0 | 0 | 0 | 0 |
| 282285 | 1 | 0 | 0 | 0 | 0 |
| 285286 | 1 | 0 | 0 | 0 | 0 |
| 285287 | 1 | 0 | 0 | 0 | 0 |
| 285288 | 1 | 0 | 0 | 0 | 0 |
| 288289 | 1 | 0 | 0 | 0 | 0 |
| 288290 | 1 | 0 | 0 | 0 | 0 |
| 288295 | 1 | 0 | 0 | 0 | 0 |
| 291292 | 1 | 0 | 0 | 0 | 0 |
| 291293 | 1 | 0 | 0 | 0 | 0 |
| 291294 | 1 | 0 | 0 | 0 | 0 |
| 295311 | 1 | 0 | 0 | 0 | 0 |
| 296297 | 1 | 0 | 0 | 0 | 0 |
| 296298 | 1 | 0 | 0 | 0 | 0 |
| 296299 | 1 | 0 | 0 | 0 | 0 |
| 296343 | 1 | 0 | 0 | 0 | 0 |
| 299300 | 1 | 0 | 0 | 0 | 0 |
| 300301 | 1 | 0 | 0 | 0 | 0 |
| 300307 | 2 | 0 | 0 | 0 | 0 |
| 301302 | 1 | 0 | 0 | 0 | 0 |
| 301303 | 1 | 0 | 0 | 0 | 0 |
| 301304 | 1 | 0 | 0 | 0 | 0 |
| 304305 | 1 | 0 | 0 | 0 | 0 |
| 304306 | 1 | 0 | 0 | 0 | 0 |
| 304364 | 1 | 0 | 0 | 0 | 0 |
| 308309 | 1 | 0 | 0 | 0 | 0 |
| 308310 | 1 | 0 | 0 | 0 | 0 |
| 308318 | 1 | 0 | 0 | 0 | 0 |
| 308320 | 1 | 0 | 0 | 0 | 0 |
| 311312 | 1 | 0 | 0 | 0 | 0 |
| 311313 | 1 | 0 | 0 | 0 | 0 |
| 311314 | 1 | 0 | 0 | 0 | 0 |
| 314315 | 1 | 0 | 0 | 0 | 0 |
| 314316 | 1 | 0 | 0 | 0 | 0 |
| 314317 | 1 | 0 | 0 | 0 | 0 |
| 317318 | 1 | 0 | 0 | 0 | 0 |
| 317319 | 2 | 0 | 0 | 0 | 0 |
| 320321 | 1 | 0 | 0 | 0 | 0 |
| 320322 | 1 | 0 | 0 | 0 | 0 |
| 320323 | 1 | 0 | 0 | 0 | 0 |
| 323324 | 1 | 0 | 0 | 0 | 0 |
| 324325 | 1 | 0 | 0 | 0 | 0 |
| 324326 | 1 | 0 | 0 | 0 | 0 |
| 324327 | 1 | 0 | 0 | 0 | 0 |
| 327328 | 1 | 0 | 0 | 0 | 0 |
| 327329 | 1 | 0 | 0 | 0 | 0 |
| 327330 | 1 | 0 | 0 | 0 | 0 |
| 330331 | 1 | 0 | 0 | 0 | 0 |

330332 1 0 0 0 0  
330333 1 0 0 0 0  
333334 1 0 0 0 0  
333335 1 0 0 0 0  
333336 1 0 0 0 0  
336337 1 0 0 0 0  
336338 1 0 0 0 0  
336339 1 0 0 0 0  
339340 1 0 0 0 0  
339341 1 0 0 0 0  
339342 1 0 0 0 0  
342343 1 0 0 0 0  
343344 1 0 0 0 0  
343345 1 0 0 0 0  
346347 1 0 0 0 0  
346348 1 0 0 0 0  
346349 1 0 0 0 0  
346350 1 0 0 0 0  
350351 1 0 0 0 0  
350360 1 0 0 0 0  
351352 1 0 0 0 0  
351353 1 0 0 0 0  
351354 1 0 0 0 0  
354355 1 0 0 0 0  
354356 1 0 0 0 0  
354357 1 0 0 0 0  
357358 1 0 0 0 0  
357359 1 0 0 0 0  
357364 1 0 0 0 0  
360361 1 0 0 0 0  
360362 1 0 0 0 0  
360363 1 0 0 0 0  
364365 1 0 0 0 0

M END  
> <NAME>  
U80\_12

\$\$\$  
U86\_12  
MOE2012 3D

396395 0 0 1 0 0 0 0 0999 V2000  
18.3670 28.5140 14.0300 C 0 0 0 0 0 0 0 0 0 0 0 0 0 0 0 0  
18.7550 28.7530 15.0300 H 0 0 0 0 0 0 0 0 0 0 0 0 0 0 0 0  
17.9030 29.4410 13.6670 H 0 0 0 0 0 0 0 0 0 0 0 0 0 0 0 0  
19.4940 28.1120 13.1570 N 0 0 0 0 0 0 0 0 0 0 0 0 0 0 0 0  
20.5250 29.1750 13.1850 C 0 0 0 0 0 0 0 0 0 0 0 0 0 0 0 0  
20.2210 30.0300 12.5660 H 0 0 0 0 0 0 0 0 0 0 0 0 0 0 0 0  
20.6340 29.5550 14.2100 H 0 0 0 0 0 0 0 0 0 0 0 0 0 0 0 0  
21.9100 28.6480 12.7620 C 0 0 0 0 0 0 0 0 0 0 0 0 0 0 0 0  
22.1800 27.8240 13.4320 H 0 0 0 0 0 0 0 0 0 0 0 0 0 0 0 0  
21.8830 28.2480 11.7420 H 0 0 0 0 0 0 0 0 0 0 0 0 0 0 0 0  
22.9030 29.7300 12.8330 N 0 0 3 0 0 0 0 0 0 0 0 0 0 0 0 0  
22.7080 30.3960 12.0840 H 0 0 0 0 0 0 0 0 0 0 0 0 0 0 0 0  
19.0450 27.8440 11.7750 C 0 0 0 0 0 0 0 0 0 0 0 0 0 0 0 0  
18.0830 28.3240 11.5530 H 0 0 0 0 0 0 0 0 0 0 0 0 0 0 0 0  
19.7300 28.2770 11.0330 H 0 0 0 0 0 0 0 0 0 0 0 0 0 0 0 0  
17.2820 27.4490 14.2270 C 0 0 0 0 0 0 0 0 0 0 0 0 0 0 0 0  
16.7430 27.2480 13.2970 H 0 0 0 0 0 0 0 0 0 0 0 0 0 0 0 0  
17.7180 26.5170 14.6020 H 0 0 0 0 0 0 0 0 0 0 0 0 0 0 0 0  
16.3360 27.9150 15.1860 O 0 0 0 0 0 0 0 0 0 0 0 0 0 0 0 0  
15.6680 27.2160 15.2920 H 0 0 0 0 0 0 0 0 0 0 0 0 0 0 0 0  
18.9700 26.3420 11.4880 C 0 0 0 0 0 0 0 0 0 0 0 0 0 0 0 0  
19.9640 25.8860 11.5500 H 0 0 0 0 0 0 0 0 0 0 0 0 0 0 0 0  
18.3050 25.8260 12.1870 H 0 0 0 0 0 0 0 0 0 0 0 0 0 0 0 0  
18.4630 26.1410 10.1720 O 0 0 0 0 0 0 0 0 0 0 0 0 0 0 0 0  
18.4130 25.1800 10.0280 H 0 0 0 0 0 0 0 0 0 0 0 0 0 0 0 0  
26.0330 17.0160 10.8450 C 0 0 0 0 0 0 0 0 0 0 0 0 0 0 0 0  
26.7930 17.2080 10.0770 H 0 0 0 0 0 0 0 0 0 0 0 0 0 0 0 0  
25.8130 17.9880 11.2980 H 0 0 0 0 0 0 0 0 0 0 0 0 0 0 0 0  
24.8070 16.5510 10.2630 O 0 0 0 0 0 0 0 0 0 0 0 0 0 0 0 0  
24.9290 15.6700 9.2320 C 0 0 0 0 0 0 0 0 0 0 0 0 0 0 0 0  
23.5690 15.2990 8.7030 C 0 0 0 0 0 0 0 0 0 0 0 0 0 0 0 0  
22.7830 15.6560 9.3790 H 0 0 0 0 0 0 0 0 0 0 0 0 0 0 0 0  
23.4450 15.8440 7.7600 H 0 0 0 0 0 0 0 0 0 0 0 0 0 0 0 0  
23.4290 13.7950 8.4580 C 0 0 0 0 0 0 0 0 0 0 0 0 0 0 0 0  
24.3700 13.3440 8.1210 H 0 0 0 0 0 0 0 0 0 0 0 0 0 0 0 0  
22.7230 13.6980 7.6220 H 0 0 0 0 0 0 0 0 0 0 0 0 0 0 0 0  
25.9860 15.2490 8.7830 O 0 0 0 0 0 0 0 0 0 0 0 0 0 0 0 0  
27.8460 26.7840 14.8510 C 0 0 0 0 0 0 0 0 0 0 0 0 0 0 0 0  
28.6050 27.4850 14.4830 H 0 0 0 0 0 0 0 0 0 0 0 0 0 0 0 0











|         |         |         |   |   |   |   |   |   |   |   |   |   |   |   |   |   |   |   |   |
|---------|---------|---------|---|---|---|---|---|---|---|---|---|---|---|---|---|---|---|---|---|
| 48.0360 | 0.3210  | 41.6690 | H | 0 | 0 | 0 | 0 | 0 | 0 | 0 | 0 | 0 | 0 | 0 | 0 | 0 | 0 | 0 | 0 |
| 46.6030 | -1.2180 | 41.2000 | C | 0 | 0 | 0 | 0 | 0 | 0 | 0 | 0 | 0 | 0 | 0 | 0 | 0 | 0 | 0 | 0 |
| 45.7490 | -0.6060 | 41.5100 | H | 0 | 0 | 0 | 0 | 0 | 0 | 0 | 0 | 0 | 0 | 0 | 0 | 0 | 0 | 0 | 0 |
| 46.2750 | -1.8330 | 40.3530 | H | 0 | 0 | 0 | 0 | 0 | 0 | 0 | 0 | 0 | 0 | 0 | 0 | 0 | 0 | 0 | 0 |
| 46.9670 | -2.0220 | 42.3260 | O | 0 | 0 | 0 | 0 | 0 | 0 | 0 | 0 | 0 | 0 | 0 | 0 | 0 | 0 | 0 | 0 |
| 47.2150 | -3.3920 | 41.9970 | C | 0 | 0 | 0 | 0 | 0 | 0 | 0 | 0 | 0 | 0 | 0 | 0 | 0 | 0 | 0 | 0 |
| 46.3950 | -3.8050 | 41.3980 | H | 0 | 0 | 0 | 0 | 0 | 0 | 0 | 0 | 0 | 0 | 0 | 0 | 0 | 0 | 0 | 0 |
| 47.1980 | -3.9480 | 42.9390 | H | 0 | 0 | 0 | 0 | 0 | 0 | 0 | 0 | 0 | 0 | 0 | 0 | 0 | 0 | 0 | 0 |
| 46.4520 | -3.6140 | 46.4720 | C | 0 | 0 | 0 | 0 | 0 | 0 | 0 | 0 | 0 | 0 | 0 | 0 | 0 | 0 | 0 | 0 |
| 45.9250 | -4.5390 | 46.1970 | H | 0 | 0 | 0 | 0 | 0 | 0 | 0 | 0 | 0 | 0 | 0 | 0 | 0 | 0 | 0 | 0 |
| 46.6300 | -3.6910 | 47.5530 | H | 0 | 0 | 0 | 0 | 0 | 0 | 0 | 0 | 0 | 0 | 0 | 0 | 0 | 0 | 0 | 0 |
| 47.7250 | -3.5230 | 45.7280 | N | 0 | 0 | 0 | 0 | 0 | 0 | 0 | 0 | 0 | 0 | 0 | 0 | 0 | 0 | 0 | 0 |
| 48.4140 | -4.8340 | 45.7520 | C | 0 | 0 | 0 | 0 | 0 | 0 | 0 | 0 | 0 | 0 | 0 | 0 | 0 | 0 | 0 | 0 |
| 48.6800 | -5.1150 | 46.7800 | H | 0 | 0 | 0 | 0 | 0 | 0 | 0 | 0 | 0 | 0 | 0 | 0 | 0 | 0 | 0 | 0 |
| 47.7090 | -5.5930 | 45.3860 | H | 0 | 0 | 0 | 0 | 0 | 0 | 0 | 0 | 0 | 0 | 0 | 0 | 0 | 0 | 0 | 0 |
| 49.6640 | -4.9020 | 44.8510 | C | 0 | 0 | 0 | 0 | 0 | 0 | 0 | 0 | 0 | 0 | 0 | 0 | 0 | 0 | 0 | 0 |
| 49.4200 | -4.4300 | 43.9010 | H | 0 | 0 | 0 | 0 | 0 | 0 | 0 | 0 | 0 | 0 | 0 | 0 | 0 | 0 | 0 | 0 |
| 50.4870 | -4.3330 | 45.2980 | H | 0 | 0 | 0 | 0 | 0 | 0 | 0 | 0 | 0 | 0 | 0 | 0 | 0 | 0 | 0 | 0 |
| 50.0890 | -6.2930 | 44.6380 | N | 0 | 0 | 3 | 0 | 0 | 0 | 0 | 0 | 0 | 0 | 0 | 0 | 0 | 0 | 0 | 0 |
| 50.4530 | -6.6560 | 45.5200 | H | 0 | 0 | 0 | 0 | 0 | 0 | 0 | 0 | 0 | 0 | 0 | 0 | 0 | 0 | 0 | 0 |
| 48.5740 | -2.4230 | 46.2280 | C | 0 | 0 | 0 | 0 | 0 | 0 | 0 | 0 | 0 | 0 | 0 | 0 | 0 | 0 | 0 | 0 |
| 48.0360 | -1.8050 | 46.9560 | H | 0 | 0 | 0 | 0 | 0 | 0 | 0 | 0 | 0 | 0 | 0 | 0 | 0 | 0 | 0 | 0 |
| 49.4510 | -2.8050 | 46.7640 | H | 0 | 0 | 0 | 0 | 0 | 0 | 0 | 0 | 0 | 0 | 0 | 0 | 0 | 0 | 0 | 0 |
| 45.4830 | -2.4610 | 46.1760 | C | 0 | 0 | 0 | 0 | 0 | 0 | 0 | 0 | 0 | 0 | 0 | 0 | 0 | 0 | 0 | 0 |
| 45.8900 | -1.4950 | 46.4870 | H | 0 | 0 | 0 | 0 | 0 | 0 | 0 | 0 | 0 | 0 | 0 | 0 | 0 | 0 | 0 | 0 |
| 45.2470 | -2.4190 | 45.1080 | H | 0 | 0 | 0 | 0 | 0 | 0 | 0 | 0 | 0 | 0 | 0 | 0 | 0 | 0 | 0 | 0 |
| 44.2690 | -2.6740 | 46.8960 | O | 0 | 0 | 0 | 0 | 0 | 0 | 0 | 0 | 0 | 0 | 0 | 0 | 0 | 0 | 0 | 0 |
| 43.6920 | -1.9120 | 46.7120 | H | 0 | 0 | 0 | 0 | 0 | 0 | 0 | 0 | 0 | 0 | 0 | 0 | 0 | 0 | 0 | 0 |
| 49.0290 | -1.5060 | 45.0850 | C | 0 | 0 | 0 | 0 | 0 | 0 | 0 | 0 | 0 | 0 | 0 | 0 | 0 | 0 | 0 | 0 |
| 49.5610 | -2.0490 | 44.2970 | H | 0 | 0 | 0 | 0 | 0 | 0 | 0 | 0 | 0 | 0 | 0 | 0 | 0 | 0 | 0 | 0 |
| 49.7140 | -0.7500 | 45.4820 | H | 0 | 0 | 0 | 0 | 0 | 0 | 0 | 0 | 0 | 0 | 0 | 0 | 0 | 0 | 0 | 0 |
| 47.9260 | -0.8130 | 44.5090 | O | 0 | 0 | 0 | 0 | 0 | 0 | 0 | 0 | 0 | 0 | 0 | 0 | 0 | 0 | 0 | 0 |
| 47.5260 | -1.4100 | 43.8340 | H | 0 | 0 | 0 | 0 | 0 | 0 | 0 | 0 | 0 | 0 | 0 | 0 | 0 | 0 | 0 | 0 |
| 1       | 2       | 1       | 0 | 0 | 0 | 0 |   |   |   |   |   |   |   |   |   |   |   |   |   |
| 1       | 3       | 1       | 0 | 0 | 0 | 0 |   |   |   |   |   |   |   |   |   |   |   |   |   |
| 1       | 4       | 1       | 0 | 0 | 0 | 0 |   |   |   |   |   |   |   |   |   |   |   |   |   |
| 1       | 16      | 1       | 0 | 0 | 0 | 0 |   |   |   |   |   |   |   |   |   |   |   |   |   |
| 4       | 5       | 1       | 0 | 0 | 0 | 0 |   |   |   |   |   |   |   |   |   |   |   |   |   |
| 4       | 13      | 1       | 0 | 0 | 0 | 0 |   |   |   |   |   |   |   |   |   |   |   |   |   |
| 5       | 6       | 1       | 0 | 0 | 0 | 0 |   |   |   |   |   |   |   |   |   |   |   |   |   |
| 5       | 7       | 1       | 0 | 0 | 0 | 0 |   |   |   |   |   |   |   |   |   |   |   |   |   |
| 5       | 8       | 1       | 0 | 0 | 0 | 0 |   |   |   |   |   |   |   |   |   |   |   |   |   |
| 8       | 9       | 1       | 0 | 0 | 0 | 0 |   |   |   |   |   |   |   |   |   |   |   |   |   |
| 8       | 10      | 1       | 0 | 0 | 0 | 0 |   |   |   |   |   |   |   |   |   |   |   |   |   |
| 8       | 11      | 1       | 0 | 0 | 0 | 0 |   |   |   |   |   |   |   |   |   |   |   |   |   |
| 11      | 12      | 1       | 0 | 0 | 0 | 0 |   |   |   |   |   |   |   |   |   |   |   |   |   |
| 11      | 41      | 1       | 0 | 0 | 0 | 0 |   |   |   |   |   |   |   |   |   |   |   |   |   |
| 13      | 14      | 1       | 0 | 0 | 0 | 0 |   |   |   |   |   |   |   |   |   |   |   |   |   |
| 13      | 15      | 1       | 0 | 0 | 0 | 0 |   |   |   |   |   |   |   |   |   |   |   |   |   |
| 13      | 21      | 1       | 0 | 0 | 0 | 0 |   |   |   |   |   |   |   |   |   |   |   |   |   |
| 16      | 17      | 1       | 0 | 0 | 0 | 0 |   |   |   |   |   |   |   |   |   |   |   |   |   |
| 16      | 18      | 1       | 0 | 0 | 0 | 0 |   |   |   |   |   |   |   |   |   |   |   |   |   |
| 16      | 19      | 1       | 0 | 0 | 0 | 0 |   |   |   |   |   |   |   |   |   |   |   |   |   |
| 19      | 20      | 1       | 0 | 0 | 0 | 0 |   |   |   |   |   |   |   |   |   |   |   |   |   |
| 21      | 22      | 1       | 0 | 0 | 0 | 0 |   |   |   |   |   |   |   |   |   |   |   |   |   |
| 21      | 23      | 1       | 0 | 0 | 0 | 0 |   |   |   |   |   |   |   |   |   |   |   |   |   |
| 21      | 24      | 1       | 0 | 0 | 0 | 0 |   |   |   |   |   |   |   |   |   |   |   |   |   |
| 24      | 25      | 1       | 0 | 0 | 0 | 0 |   |   |   |   |   |   |   |   |   |   |   |   |   |
| 26      | 27      | 1       | 0 | 0 | 0 | 0 |   |   |   |   |   |   |   |   |   |   |   |   |   |
| 26      | 28      | 1       | 0 | 0 | 0 | 0 |   |   |   |   |   |   |   |   |   |   |   |   |   |
| 26      | 29      | 1       | 0 | 0 | 0 | 0 |   |   |   |   |   |   |   |   |   |   |   |   |   |
| 26      | 73      | 1       | 0 | 0 | 0 | 0 |   |   |   |   |   |   |   |   |   |   |   |   |   |
| 29      | 30      | 1       | 0 | 0 | 0 | 0 |   |   |   |   |   |   |   |   |   |   |   |   |   |
| 30      | 31      | 1       | 0 | 0 | 0 | 0 |   |   |   |   |   |   |   |   |   |   |   |   |   |
| 30      | 37      | 2       | 0 | 0 | 0 | 0 |   |   |   |   |   |   |   |   |   |   |   |   |   |
| 31      | 32      | 1       | 0 | 0 | 0 | 0 |   |   |   |   |   |   |   |   |   |   |   |   |   |
| 31      | 33      | 1       | 0 | 0 | 0 | 0 |   |   |   |   |   |   |   |   |   |   |   |   |   |
| 31      | 34      | 1       | 0 | 0 | 0 | 0 |   |   |   |   |   |   |   |   |   |   |   |   |   |
| 34      | 35      | 1       | 0 | 0 | 0 | 0 |   |   |   |   |   |   |   |   |   |   |   |   |   |
| 34      | 36      | 1       | 0 | 0 | 0 | 0 |   |   |   |   |   |   |   |   |   |   |   |   |   |
| 34      | 86      | 1       | 0 | 0 | 0 | 0 |   |   |   |   |   |   |   |   |   |   |   |   |   |
| 38      | 39      | 1       | 0 | 0 | 0 | 0 |   |   |   |   |   |   |   |   |   |   |   |   |   |
| 38      | 40      | 1       | 0 | 0 | 0 | 0 |   |   |   |   |   |   |   |   |   |   |   |   |   |
| 38      | 48      | 1       | 0 | 0 | 0 | 0 |   |   |   |   |   |   |   |   |   |   |   |   |   |
| 38      | 50      | 1       | 0 | 0 | 0 | 0 |   |   |   |   |   |   |   |   |   |   |   |   |   |
| 41      | 42      | 1       | 0 | 0 | 0 | 0 |   |   |   |   |   |   |   |   |   |   |   |   |   |
| 41      | 43      | 1       | 0 | 0 | 0 | 0 |   |   |   |   |   |   |   |   |   |   |   |   |   |
| 41      | 44      | 1       | 0 | 0 | 0 | 0 |   |   |   |   |   |   |   |   |   |   |   |   |   |
| 44      | 45      | 1       | 0 | 0 | 0 | 0 |   |   |   |   |   |   |   |   |   |   |   |   |   |
| 44      | 46      | 1       | 0 | 0 | 0 | 0 |   |   |   |   |   |   |   |   |   |   |   |   |   |
| 44      | 47      | 1       | 0 | 0 | 0 | 0 |   |   |   |   |   |   |   |   |   |   |   |   |   |

|     |     |   |   |   |   |   |
|-----|-----|---|---|---|---|---|
| 47  | 48  | 1 | 0 | 0 | 0 | 0 |
| 47  | 49  | 2 | 0 | 0 | 0 | 0 |
| 50  | 51  | 1 | 0 | 0 | 0 | 0 |
| 50  | 52  | 1 | 0 | 0 | 0 | 0 |
| 50  | 53  | 1 | 0 | 0 | 0 | 0 |
| 53  | 54  | 1 | 0 | 0 | 0 | 0 |
| 54  | 55  | 1 | 0 | 0 | 0 | 0 |
| 54  | 56  | 1 | 0 | 0 | 0 | 0 |
| 54  | 57  | 1 | 0 | 0 | 0 | 0 |
| 57  | 58  | 1 | 0 | 0 | 0 | 0 |
| 57  | 59  | 1 | 0 | 0 | 0 | 0 |
| 57  | 60  | 1 | 0 | 0 | 0 | 0 |
| 60  | 61  | 1 | 0 | 0 | 0 | 0 |
| 60  | 62  | 1 | 0 | 0 | 0 | 0 |
| 60  | 63  | 1 | 0 | 0 | 0 | 0 |
| 63  | 64  | 1 | 0 | 0 | 0 | 0 |
| 63  | 65  | 1 | 0 | 0 | 0 | 0 |
| 63  | 66  | 1 | 0 | 0 | 0 | 0 |
| 66  | 67  | 1 | 0 | 0 | 0 | 0 |
| 66  | 68  | 1 | 0 | 0 | 0 | 0 |
| 66  | 69  | 1 | 0 | 0 | 0 | 0 |
| 69  | 70  | 1 | 0 | 0 | 0 | 0 |
| 69  | 71  | 1 | 0 | 0 | 0 | 0 |
| 69  | 72  | 1 | 0 | 0 | 0 | 0 |
| 72  | 73  | 1 | 0 | 0 | 0 | 0 |
| 73  | 74  | 1 | 0 | 0 | 0 | 0 |
| 73  | 75  | 1 | 0 | 0 | 0 | 0 |
| 76  | 77  | 1 | 0 | 0 | 0 | 0 |
| 76  | 78  | 1 | 0 | 0 | 0 | 0 |
| 76  | 79  | 1 | 0 | 0 | 0 | 0 |
| 76  | 90  | 1 | 0 | 0 | 0 | 0 |
| 79  | 80  | 1 | 0 | 0 | 0 | 0 |
| 79  | 87  | 1 | 0 | 0 | 0 | 0 |
| 80  | 81  | 1 | 0 | 0 | 0 | 0 |
| 80  | 82  | 1 | 0 | 0 | 0 | 0 |
| 80  | 83  | 1 | 0 | 0 | 0 | 0 |
| 83  | 84  | 1 | 0 | 0 | 0 | 0 |
| 83  | 85  | 1 | 0 | 0 | 0 | 0 |
| 83  | 86  | 1 | 0 | 0 | 0 | 0 |
| 86  | 115 | 1 | 0 | 0 | 0 | 0 |
| 87  | 88  | 1 | 0 | 0 | 0 | 0 |
| 87  | 89  | 1 | 0 | 0 | 0 | 0 |
| 87  | 95  | 1 | 0 | 0 | 0 | 0 |
| 90  | 91  | 1 | 0 | 0 | 0 | 0 |
| 90  | 92  | 1 | 0 | 0 | 0 | 0 |
| 90  | 93  | 1 | 0 | 0 | 0 | 0 |
| 93  | 94  | 1 | 0 | 0 | 0 | 0 |
| 95  | 96  | 1 | 0 | 0 | 0 | 0 |
| 95  | 97  | 1 | 0 | 0 | 0 | 0 |
| 95  | 98  | 1 | 0 | 0 | 0 | 0 |
| 98  | 99  | 1 | 0 | 0 | 0 | 0 |
| 100 | 101 | 1 | 0 | 0 | 0 | 0 |
| 100 | 102 | 1 | 0 | 0 | 0 | 0 |
| 100 | 103 | 1 | 0 | 0 | 0 | 0 |
| 100 | 147 | 1 | 0 | 0 | 0 | 0 |
| 103 | 104 | 1 | 0 | 0 | 0 | 0 |
| 104 | 105 | 1 | 0 | 0 | 0 | 0 |
| 104 | 111 | 2 | 0 | 0 | 0 | 0 |
| 105 | 106 | 1 | 0 | 0 | 0 | 0 |
| 105 | 107 | 1 | 0 | 0 | 0 | 0 |
| 105 | 108 | 1 | 0 | 0 | 0 | 0 |
| 108 | 109 | 1 | 0 | 0 | 0 | 0 |
| 108 | 110 | 1 | 0 | 0 | 0 | 0 |
| 108 | 160 | 1 | 0 | 0 | 0 | 0 |
| 112 | 113 | 1 | 0 | 0 | 0 | 0 |
| 112 | 114 | 1 | 0 | 0 | 0 | 0 |
| 112 | 122 | 1 | 0 | 0 | 0 | 0 |
| 112 | 124 | 1 | 0 | 0 | 0 | 0 |
| 115 | 116 | 1 | 0 | 0 | 0 | 0 |
| 115 | 117 | 1 | 0 | 0 | 0 | 0 |
| 115 | 118 | 1 | 0 | 0 | 0 | 0 |
| 118 | 119 | 1 | 0 | 0 | 0 | 0 |
| 118 | 120 | 1 | 0 | 0 | 0 | 0 |
| 118 | 121 | 1 | 0 | 0 | 0 | 0 |
| 121 | 122 | 1 | 0 | 0 | 0 | 0 |
| 121 | 123 | 2 | 0 | 0 | 0 | 0 |
| 124 | 125 | 1 | 0 | 0 | 0 | 0 |
| 124 | 126 | 1 | 0 | 0 | 0 | 0 |
| 124 | 127 | 1 | 0 | 0 | 0 | 0 |
| 127 | 128 | 1 | 0 | 0 | 0 | 0 |
| 128 | 129 | 1 | 0 | 0 | 0 | 0 |

|        |   |   |   |   |   |
|--------|---|---|---|---|---|
| 128130 | 1 | 0 | 0 | 0 | 0 |
| 128131 | 1 | 0 | 0 | 0 | 0 |
| 131132 | 1 | 0 | 0 | 0 | 0 |
| 131133 | 1 | 0 | 0 | 0 | 0 |
| 131134 | 1 | 0 | 0 | 0 | 0 |
| 134135 | 1 | 0 | 0 | 0 | 0 |
| 134136 | 1 | 0 | 0 | 0 | 0 |
| 134137 | 1 | 0 | 0 | 0 | 0 |
| 137138 | 1 | 0 | 0 | 0 | 0 |
| 137139 | 1 | 0 | 0 | 0 | 0 |
| 137140 | 1 | 0 | 0 | 0 | 0 |
| 140141 | 1 | 0 | 0 | 0 | 0 |
| 140142 | 1 | 0 | 0 | 0 | 0 |
| 140143 | 1 | 0 | 0 | 0 | 0 |
| 143144 | 1 | 0 | 0 | 0 | 0 |
| 143145 | 1 | 0 | 0 | 0 | 0 |
| 143146 | 1 | 0 | 0 | 0 | 0 |
| 146147 | 1 | 0 | 0 | 0 | 0 |
| 147148 | 1 | 0 | 0 | 0 | 0 |
| 147149 | 1 | 0 | 0 | 0 | 0 |
| 150151 | 1 | 0 | 0 | 0 | 0 |
| 150152 | 1 | 0 | 0 | 0 | 0 |
| 150153 | 1 | 0 | 0 | 0 | 0 |
| 150164 | 1 | 0 | 0 | 0 | 0 |
| 153154 | 1 | 0 | 0 | 0 | 0 |
| 153161 | 1 | 0 | 0 | 0 | 0 |
| 154155 | 1 | 0 | 0 | 0 | 0 |
| 154156 | 1 | 0 | 0 | 0 | 0 |
| 154157 | 1 | 0 | 0 | 0 | 0 |
| 157158 | 1 | 0 | 0 | 0 | 0 |
| 157159 | 1 | 0 | 0 | 0 | 0 |
| 157160 | 1 | 0 | 0 | 0 | 0 |
| 160189 | 1 | 0 | 0 | 0 | 0 |
| 161162 | 1 | 0 | 0 | 0 | 0 |
| 161163 | 1 | 0 | 0 | 0 | 0 |
| 161169 | 1 | 0 | 0 | 0 | 0 |
| 164165 | 1 | 0 | 0 | 0 | 0 |
| 164166 | 1 | 0 | 0 | 0 | 0 |
| 164167 | 1 | 0 | 0 | 0 | 0 |
| 167168 | 1 | 0 | 0 | 0 | 0 |
| 169170 | 1 | 0 | 0 | 0 | 0 |
| 169171 | 1 | 0 | 0 | 0 | 0 |
| 169172 | 1 | 0 | 0 | 0 | 0 |
| 172173 | 1 | 0 | 0 | 0 | 0 |
| 174175 | 1 | 0 | 0 | 0 | 0 |
| 174176 | 1 | 0 | 0 | 0 | 0 |
| 174177 | 1 | 0 | 0 | 0 | 0 |
| 174221 | 1 | 0 | 0 | 0 | 0 |
| 177178 | 1 | 0 | 0 | 0 | 0 |
| 178179 | 1 | 0 | 0 | 0 | 0 |
| 178185 | 2 | 0 | 0 | 0 | 0 |
| 179180 | 1 | 0 | 0 | 0 | 0 |
| 179181 | 1 | 0 | 0 | 0 | 0 |
| 179182 | 1 | 0 | 0 | 0 | 0 |
| 182183 | 1 | 0 | 0 | 0 | 0 |
| 182184 | 1 | 0 | 0 | 0 | 0 |
| 182234 | 1 | 0 | 0 | 0 | 0 |
| 186187 | 1 | 0 | 0 | 0 | 0 |
| 186188 | 1 | 0 | 0 | 0 | 0 |
| 186196 | 1 | 0 | 0 | 0 | 0 |
| 186198 | 1 | 0 | 0 | 0 | 0 |
| 189190 | 1 | 0 | 0 | 0 | 0 |
| 189191 | 1 | 0 | 0 | 0 | 0 |
| 189192 | 1 | 0 | 0 | 0 | 0 |
| 192193 | 1 | 0 | 0 | 0 | 0 |
| 192194 | 1 | 0 | 0 | 0 | 0 |
| 192195 | 1 | 0 | 0 | 0 | 0 |
| 195196 | 1 | 0 | 0 | 0 | 0 |
| 195197 | 2 | 0 | 0 | 0 | 0 |
| 198199 | 1 | 0 | 0 | 0 | 0 |
| 198200 | 1 | 0 | 0 | 0 | 0 |
| 198201 | 1 | 0 | 0 | 0 | 0 |
| 201202 | 1 | 0 | 0 | 0 | 0 |
| 202203 | 1 | 0 | 0 | 0 | 0 |
| 202204 | 1 | 0 | 0 | 0 | 0 |
| 202205 | 1 | 0 | 0 | 0 | 0 |
| 205206 | 1 | 0 | 0 | 0 | 0 |
| 205207 | 1 | 0 | 0 | 0 | 0 |
| 205208 | 1 | 0 | 0 | 0 | 0 |
| 208209 | 1 | 0 | 0 | 0 | 0 |
| 208210 | 1 | 0 | 0 | 0 | 0 |

|        |   |   |   |   |   |
|--------|---|---|---|---|---|
| 208211 | 1 | 0 | 0 | 0 | 0 |
| 211212 | 1 | 0 | 0 | 0 | 0 |
| 211213 | 1 | 0 | 0 | 0 | 0 |
| 211214 | 1 | 0 | 0 | 0 | 0 |
| 214215 | 1 | 0 | 0 | 0 | 0 |
| 214216 | 1 | 0 | 0 | 0 | 0 |
| 214217 | 1 | 0 | 0 | 0 | 0 |
| 217218 | 1 | 0 | 0 | 0 | 0 |
| 217219 | 1 | 0 | 0 | 0 | 0 |
| 217220 | 1 | 0 | 0 | 0 | 0 |
| 220221 | 1 | 0 | 0 | 0 | 0 |
| 221222 | 1 | 0 | 0 | 0 | 0 |
| 221223 | 1 | 0 | 0 | 0 | 0 |
| 224225 | 1 | 0 | 0 | 0 | 0 |
| 224226 | 1 | 0 | 0 | 0 | 0 |
| 224227 | 1 | 0 | 0 | 0 | 0 |
| 224238 | 1 | 0 | 0 | 0 | 0 |
| 227228 | 1 | 0 | 0 | 0 | 0 |
| 227235 | 1 | 0 | 0 | 0 | 0 |
| 228229 | 1 | 0 | 0 | 0 | 0 |
| 228230 | 1 | 0 | 0 | 0 | 0 |
| 228231 | 1 | 0 | 0 | 0 | 0 |
| 231232 | 1 | 0 | 0 | 0 | 0 |
| 231233 | 1 | 0 | 0 | 0 | 0 |
| 231234 | 1 | 0 | 0 | 0 | 0 |
| 234263 | 1 | 0 | 0 | 0 | 0 |
| 235236 | 1 | 0 | 0 | 0 | 0 |
| 235237 | 1 | 0 | 0 | 0 | 0 |
| 235243 | 1 | 0 | 0 | 0 | 0 |
| 238239 | 1 | 0 | 0 | 0 | 0 |
| 238240 | 1 | 0 | 0 | 0 | 0 |
| 238241 | 1 | 0 | 0 | 0 | 0 |
| 241242 | 1 | 0 | 0 | 0 | 0 |
| 243244 | 1 | 0 | 0 | 0 | 0 |
| 243245 | 1 | 0 | 0 | 0 | 0 |
| 243246 | 1 | 0 | 0 | 0 | 0 |
| 246247 | 1 | 0 | 0 | 0 | 0 |
| 248249 | 1 | 0 | 0 | 0 | 0 |
| 248250 | 1 | 0 | 0 | 0 | 0 |
| 248251 | 1 | 0 | 0 | 0 | 0 |
| 248295 | 1 | 0 | 0 | 0 | 0 |
| 251252 | 1 | 0 | 0 | 0 | 0 |
| 252253 | 1 | 0 | 0 | 0 | 0 |
| 252259 | 2 | 0 | 0 | 0 | 0 |
| 253254 | 1 | 0 | 0 | 0 | 0 |
| 253255 | 1 | 0 | 0 | 0 | 0 |
| 253256 | 1 | 0 | 0 | 0 | 0 |
| 256257 | 1 | 0 | 0 | 0 | 0 |
| 256258 | 1 | 0 | 0 | 0 | 0 |
| 256308 | 1 | 0 | 0 | 0 | 0 |
| 260261 | 1 | 0 | 0 | 0 | 0 |
| 260262 | 1 | 0 | 0 | 0 | 0 |
| 260270 | 1 | 0 | 0 | 0 | 0 |
| 260272 | 1 | 0 | 0 | 0 | 0 |
| 263264 | 1 | 0 | 0 | 0 | 0 |
| 263265 | 1 | 0 | 0 | 0 | 0 |
| 263266 | 1 | 0 | 0 | 0 | 0 |
| 266267 | 1 | 0 | 0 | 0 | 0 |
| 266268 | 1 | 0 | 0 | 0 | 0 |
| 266269 | 1 | 0 | 0 | 0 | 0 |
| 269270 | 1 | 0 | 0 | 0 | 0 |
| 269271 | 2 | 0 | 0 | 0 | 0 |
| 272273 | 1 | 0 | 0 | 0 | 0 |
| 272274 | 1 | 0 | 0 | 0 | 0 |
| 272275 | 1 | 0 | 0 | 0 | 0 |
| 275276 | 1 | 0 | 0 | 0 | 0 |
| 276277 | 1 | 0 | 0 | 0 | 0 |
| 276278 | 1 | 0 | 0 | 0 | 0 |
| 276279 | 1 | 0 | 0 | 0 | 0 |
| 279280 | 1 | 0 | 0 | 0 | 0 |
| 279281 | 1 | 0 | 0 | 0 | 0 |
| 279282 | 1 | 0 | 0 | 0 | 0 |
| 282283 | 1 | 0 | 0 | 0 | 0 |
| 282284 | 1 | 0 | 0 | 0 | 0 |
| 282285 | 1 | 0 | 0 | 0 | 0 |
| 285286 | 1 | 0 | 0 | 0 | 0 |
| 285287 | 1 | 0 | 0 | 0 | 0 |
| 285288 | 1 | 0 | 0 | 0 | 0 |
| 288289 | 1 | 0 | 0 | 0 | 0 |
| 288290 | 1 | 0 | 0 | 0 | 0 |
| 288291 | 1 | 0 | 0 | 0 | 0 |



|        |   |   |   |   |   |
|--------|---|---|---|---|---|
| 291292 | 1 | 0 | 0 | 0 | 0 |
| 291293 | 1 | 0 | 0 | 0 | 0 |
| 291294 | 1 | 0 | 0 | 0 | 0 |
| 294295 | 1 | 0 | 0 | 0 | 0 |
| 295296 | 1 | 0 | 0 | 0 | 0 |
| 295297 | 1 | 0 | 0 | 0 | 0 |
| 298299 | 1 | 0 | 0 | 0 | 0 |
| 298300 | 1 | 0 | 0 | 0 | 0 |
| 298301 | 1 | 0 | 0 | 0 | 0 |
| 298312 | 1 | 0 | 0 | 0 | 0 |
| 301302 | 1 | 0 | 0 | 0 | 0 |
| 301309 | 1 | 0 | 0 | 0 | 0 |
| 302303 | 1 | 0 | 0 | 0 | 0 |
| 302304 | 1 | 0 | 0 | 0 | 0 |
| 302305 | 1 | 0 | 0 | 0 | 0 |
| 305306 | 1 | 0 | 0 | 0 | 0 |
| 305307 | 1 | 0 | 0 | 0 | 0 |
| 305308 | 1 | 0 | 0 | 0 | 0 |
| 308337 | 1 | 0 | 0 | 0 | 0 |
| 309310 | 1 | 0 | 0 | 0 | 0 |
| 309311 | 1 | 0 | 0 | 0 | 0 |
| 309317 | 1 | 0 | 0 | 0 | 0 |
| 312313 | 1 | 0 | 0 | 0 | 0 |
| 312314 | 1 | 0 | 0 | 0 | 0 |
| 312315 | 1 | 0 | 0 | 0 | 0 |
| 315316 | 1 | 0 | 0 | 0 | 0 |
| 317318 | 1 | 0 | 0 | 0 | 0 |
| 317319 | 1 | 0 | 0 | 0 | 0 |
| 317320 | 1 | 0 | 0 | 0 | 0 |
| 320321 | 1 | 0 | 0 | 0 | 0 |
| 322323 | 1 | 0 | 0 | 0 | 0 |
| 322324 | 1 | 0 | 0 | 0 | 0 |
| 322325 | 1 | 0 | 0 | 0 | 0 |
| 322369 | 1 | 0 | 0 | 0 | 0 |
| 325326 | 1 | 0 | 0 | 0 | 0 |
| 326327 | 1 | 0 | 0 | 0 | 0 |
| 326333 | 2 | 0 | 0 | 0 | 0 |
| 327328 | 1 | 0 | 0 | 0 | 0 |
| 327329 | 1 | 0 | 0 | 0 | 0 |
| 327330 | 1 | 0 | 0 | 0 | 0 |
| 330331 | 1 | 0 | 0 | 0 | 0 |
| 330332 | 1 | 0 | 0 | 0 | 0 |
| 330382 | 1 | 0 | 0 | 0 | 0 |
| 334335 | 1 | 0 | 0 | 0 | 0 |
| 334336 | 1 | 0 | 0 | 0 | 0 |
| 334344 | 1 | 0 | 0 | 0 | 0 |
| 334346 | 1 | 0 | 0 | 0 | 0 |
| 337338 | 1 | 0 | 0 | 0 | 0 |
| 337339 | 1 | 0 | 0 | 0 | 0 |
| 337340 | 1 | 0 | 0 | 0 | 0 |
| 340341 | 1 | 0 | 0 | 0 | 0 |
| 340342 | 1 | 0 | 0 | 0 | 0 |
| 340343 | 1 | 0 | 0 | 0 | 0 |
| 343344 | 1 | 0 | 0 | 0 | 0 |
| 343345 | 2 | 0 | 0 | 0 | 0 |
| 346347 | 1 | 0 | 0 | 0 | 0 |
| 346348 | 1 | 0 | 0 | 0 | 0 |
| 346349 | 1 | 0 | 0 | 0 | 0 |
| 349350 | 1 | 0 | 0 | 0 | 0 |
| 350351 | 1 | 0 | 0 | 0 | 0 |
| 350352 | 1 | 0 | 0 | 0 | 0 |
| 350353 | 1 | 0 | 0 | 0 | 0 |
| 353354 | 1 | 0 | 0 | 0 | 0 |
| 353355 | 1 | 0 | 0 | 0 | 0 |
| 353356 | 1 | 0 | 0 | 0 | 0 |
| 356357 | 1 | 0 | 0 | 0 | 0 |
| 356358 | 1 | 0 | 0 | 0 | 0 |
| 356359 | 1 | 0 | 0 | 0 | 0 |
| 359360 | 1 | 0 | 0 | 0 | 0 |
| 359361 | 1 | 0 | 0 | 0 | 0 |
| 359362 | 1 | 0 | 0 | 0 | 0 |
| 362363 | 1 | 0 | 0 | 0 | 0 |
| 362364 | 1 | 0 | 0 | 0 | 0 |
| 362365 | 1 | 0 | 0 | 0 | 0 |
| 365366 | 1 | 0 | 0 | 0 | 0 |
| 365367 | 1 | 0 | 0 | 0 | 0 |
| 365368 | 1 | 0 | 0 | 0 | 0 |
| 368369 | 1 | 0 | 0 | 0 | 0 |
| 369370 | 1 | 0 | 0 | 0 | 0 |
| 369371 | 1 | 0 | 0 | 0 | 0 |
| 372373 | 1 | 0 | 0 | 0 | 0 |











|         |         |         |   |   |   |   |   |   |   |   |   |   |   |   |   |   |   |   |   |
|---------|---------|---------|---|---|---|---|---|---|---|---|---|---|---|---|---|---|---|---|---|
| 67.8930 | 19.8180 | 19.4250 | C | 0 | 0 | 0 | 0 | 0 | 0 | 0 | 0 | 0 | 0 | 0 | 0 | 0 | 0 | 0 | 0 |
| 68.8840 | 20.2320 | 19.6460 | H | 0 | 0 | 0 | 0 | 0 | 0 | 0 | 0 | 0 | 0 | 0 | 0 | 0 | 0 | 0 | 0 |
| 67.8660 | 19.5970 | 18.3510 | H | 0 | 0 | 0 | 0 | 0 | 0 | 0 | 0 | 0 | 0 | 0 | 0 | 0 | 0 | 0 | 0 |
| 66.8190 | 20.8510 | 19.7610 | C | 0 | 0 | 0 | 0 | 0 | 0 | 0 | 0 | 0 | 0 | 0 | 0 | 0 | 0 | 0 | 0 |
| 65.8230 | 20.4280 | 19.5820 | H | 0 | 0 | 0 | 0 | 0 | 0 | 0 | 0 | 0 | 0 | 0 | 0 | 0 | 0 | 0 | 0 |
| 66.8490 | 21.0960 | 20.8300 | H | 0 | 0 | 0 | 0 | 0 | 0 | 0 | 0 | 0 | 0 | 0 | 0 | 0 | 0 | 0 | 0 |
| 66.9870 | 22.1300 | 18.9460 | C | 0 | 0 | 0 | 0 | 0 | 0 | 0 | 0 | 0 | 0 | 0 | 0 | 0 | 0 | 0 | 0 |
| 67.9310 | 22.6170 | 19.2150 | H | 0 | 0 | 0 | 0 | 0 | 0 | 0 | 0 | 0 | 0 | 0 | 0 | 0 | 0 | 0 | 0 |
| 67.0210 | 21.9150 | 17.8710 | H | 0 | 0 | 0 | 0 | 0 | 0 | 0 | 0 | 0 | 0 | 0 | 0 | 0 | 0 | 0 | 0 |
| 65.9330 | 23.0330 | 19.2770 | O | 0 | 0 | 0 | 0 | 0 | 0 | 0 | 0 | 0 | 0 | 0 | 0 | 0 | 0 | 0 | 0 |
| 65.0490 | 23.3240 | 18.1960 | C | 0 | 0 | 0 | 0 | 0 | 0 | 0 | 0 | 0 | 0 | 0 | 0 | 0 | 0 | 0 | 0 |
| 65.6170 | 23.6370 | 17.3120 | H | 0 | 0 | 0 | 0 | 0 | 0 | 0 | 0 | 0 | 0 | 0 | 0 | 0 | 0 | 0 | 0 |
| 64.4520 | 24.1940 | 18.4920 | H | 0 | 0 | 0 | 0 | 0 | 0 | 0 | 0 | 0 | 0 | 0 | 0 | 0 | 0 | 0 | 0 |
| 59.1570 | 30.8400 | 16.9840 | C | 0 | 0 | 0 | 0 | 0 | 0 | 0 | 0 | 0 | 0 | 0 | 0 | 0 | 0 | 0 | 0 |
| 59.1390 | 31.6820 | 17.6870 | H | 0 | 0 | 0 | 0 | 0 | 0 | 0 | 0 | 0 | 0 | 0 | 0 | 0 | 0 | 0 | 0 |
| 60.0250 | 31.0300 | 16.3380 | H | 0 | 0 | 0 | 0 | 0 | 0 | 0 | 0 | 0 | 0 | 0 | 0 | 0 | 0 | 0 | 0 |
| 59.2910 | 29.5550 | 17.7030 | N | 0 | 0 | 0 | 0 | 0 | 0 | 0 | 0 | 0 | 0 | 0 | 0 | 0 | 0 | 0 | 0 |
| 59.7490 | 28.4930 | 16.7840 | C | 0 | 0 | 0 | 0 | 0 | 0 | 0 | 0 | 0 | 0 | 0 | 0 | 0 | 0 | 0 | 0 |
| 59.2600 | 28.5950 | 15.8090 | H | 0 | 0 | 0 | 0 | 0 | 0 | 0 | 0 | 0 | 0 | 0 | 0 | 0 | 0 | 0 | 0 |
| 60.8280 | 28.5790 | 16.5970 | H | 0 | 0 | 0 | 0 | 0 | 0 | 0 | 0 | 0 | 0 | 0 | 0 | 0 | 0 | 0 | 0 |
| 59.3990 | 27.0950 | 17.3130 | C | 0 | 0 | 0 | 0 | 0 | 0 | 0 | 0 | 0 | 0 | 0 | 0 | 0 | 0 | 0 | 0 |
| 59.8860 | 26.9110 | 18.2770 | H | 0 | 0 | 0 | 0 | 0 | 0 | 0 | 0 | 0 | 0 | 0 | 0 | 0 | 0 | 0 | 0 |
| 58.3160 | 27.0280 | 17.4820 | H | 0 | 0 | 0 | 0 | 0 | 0 | 0 | 0 | 0 | 0 | 0 | 0 | 0 | 0 | 0 | 0 |
| 59.8320 | 26.0170 | 16.3170 | C | 0 | 0 | 0 | 0 | 0 | 0 | 0 | 0 | 0 | 0 | 0 | 0 | 0 | 0 | 0 | 0 |
| 59.3030 | 26.1620 | 15.3680 | H | 0 | 0 | 0 | 0 | 0 | 0 | 0 | 0 | 0 | 0 | 0 | 0 | 0 | 0 | 0 | 0 |
| 60.9070 | 26.1190 | 16.1280 | H | 0 | 0 | 0 | 0 | 0 | 0 | 0 | 0 | 0 | 0 | 0 | 0 | 0 | 0 | 0 | 0 |
| 60.2230 | 29.6960 | 18.8420 | C | 0 | 0 | 0 | 0 | 0 | 0 | 0 | 0 | 0 | 0 | 0 | 0 | 0 | 0 | 0 | 0 |
| 60.5860 | 28.7180 | 19.1800 | H | 0 | 0 | 0 | 0 | 0 | 0 | 0 | 0 | 0 | 0 | 0 | 0 | 0 | 0 | 0 | 0 |
| 61.1290 | 30.2470 | 18.5520 | H | 0 | 0 | 0 | 0 | 0 | 0 | 0 | 0 | 0 | 0 | 0 | 0 | 0 | 0 | 0 | 0 |
| 59.5240 | 24.6990 | 16.8660 | N | 0 | 0 | 3 | 0 | 0 | 0 | 0 | 0 | 0 | 0 | 0 | 0 | 0 | 0 | 0 | 0 |
| 60.0360 | 24.5680 | 17.7480 | H | 0 | 0 | 0 | 0 | 0 | 0 | 0 | 0 | 0 | 0 | 0 | 0 | 0 | 0 | 0 | 0 |
| 57.8590 | 30.9310 | 16.1720 | C | 0 | 0 | 0 | 0 | 0 | 0 | 0 | 0 | 0 | 0 | 0 | 0 | 0 | 0 | 0 | 0 |
| 57.8150 | 30.1760 | 15.3820 | H | 0 | 0 | 0 | 0 | 0 | 0 | 0 | 0 | 0 | 0 | 0 | 0 | 0 | 0 | 0 | 0 |
| 56.9880 | 30.8110 | 16.8240 | H | 0 | 0 | 0 | 0 | 0 | 0 | 0 | 0 | 0 | 0 | 0 | 0 | 0 | 0 | 0 | 0 |
| 57.7840 | 32.2130 | 15.5550 | O | 0 | 0 | 0 | 0 | 0 | 0 | 0 | 0 | 0 | 0 | 0 | 0 | 0 | 0 | 0 | 0 |
| 56.9320 | 32.2560 | 15.0870 | H | 0 | 0 | 0 | 0 | 0 | 0 | 0 | 0 | 0 | 0 | 0 | 0 | 0 | 0 | 0 | 0 |
| 59.5660 | 30.3560 | 20.0590 | C | 0 | 0 | 0 | 0 | 0 | 0 | 0 | 0 | 0 | 0 | 0 | 0 | 0 | 0 | 0 | 0 |
| 59.2750 | 31.3910 | 19.8560 | H | 0 | 0 | 0 | 0 | 0 | 0 | 0 | 0 | 0 | 0 | 0 | 0 | 0 | 0 | 0 | 0 |
| 58.6810 | 29.7940 | 20.3730 | H | 0 | 0 | 0 | 0 | 0 | 0 | 0 | 0 | 0 | 0 | 0 | 0 | 0 | 0 | 0 | 0 |
| 60.4930 | 30.3660 | 21.1420 | O | 0 | 0 | 0 | 0 | 0 | 0 | 0 | 0 | 0 | 0 | 0 | 0 | 0 | 0 | 0 | 0 |
| 60.0470 | 30.7970 | 21.8920 | H | 0 | 0 | 0 | 0 | 0 | 0 | 0 | 0 | 0 | 0 | 0 | 0 | 0 | 0 | 0 | 0 |
| 1       | 2       | 1       | 0 | 0 | 0 | 0 |   |   |   |   |   |   |   |   |   |   |   |   |   |
| 1       | 3       | 1       | 0 | 0 | 0 | 0 |   |   |   |   |   |   |   |   |   |   |   |   |   |
| 1       | 4       | 1       | 0 | 0 | 0 | 0 |   |   |   |   |   |   |   |   |   |   |   |   |   |
| 1       | 19      | 1       | 0 | 0 | 0 | 0 |   |   |   |   |   |   |   |   |   |   |   |   |   |
| 4       | 5       | 1       | 0 | 0 | 0 | 0 |   |   |   |   |   |   |   |   |   |   |   |   |   |
| 4       | 14      | 1       | 0 | 0 | 0 | 0 |   |   |   |   |   |   |   |   |   |   |   |   |   |
| 5       | 6       | 1       | 0 | 0 | 0 | 0 |   |   |   |   |   |   |   |   |   |   |   |   |   |
| 5       | 7       | 1       | 0 | 0 | 0 | 0 |   |   |   |   |   |   |   |   |   |   |   |   |   |
| 5       | 8       | 1       | 0 | 0 | 0 | 0 |   |   |   |   |   |   |   |   |   |   |   |   |   |
| 8       | 9       | 1       | 0 | 0 | 0 | 0 |   |   |   |   |   |   |   |   |   |   |   |   |   |
| 8       | 10      | 1       | 0 | 0 | 0 | 0 |   |   |   |   |   |   |   |   |   |   |   |   |   |
| 8       | 11      | 1       | 0 | 0 | 0 | 0 |   |   |   |   |   |   |   |   |   |   |   |   |   |
| 11      | 12      | 1       | 0 | 0 | 0 | 0 |   |   |   |   |   |   |   |   |   |   |   |   |   |
| 11      | 13      | 1       | 0 | 0 | 0 | 0 |   |   |   |   |   |   |   |   |   |   |   |   |   |
| 11      | 17      | 1       | 0 | 0 | 0 | 0 |   |   |   |   |   |   |   |   |   |   |   |   |   |
| 14      | 15      | 1       | 0 | 0 | 0 | 0 |   |   |   |   |   |   |   |   |   |   |   |   |   |
| 14      | 16      | 1       | 0 | 0 | 0 | 0 |   |   |   |   |   |   |   |   |   |   |   |   |   |
| 14      | 24      | 1       | 0 | 0 | 0 | 0 |   |   |   |   |   |   |   |   |   |   |   |   |   |
| 17      | 18      | 1       | 0 | 0 | 0 | 0 |   |   |   |   |   |   |   |   |   |   |   |   |   |
| 17      | 44      | 1       | 0 | 0 | 0 | 0 |   |   |   |   |   |   |   |   |   |   |   |   |   |
| 19      | 20      | 1       | 0 | 0 | 0 | 0 |   |   |   |   |   |   |   |   |   |   |   |   |   |
| 19      | 21      | 1       | 0 | 0 | 0 | 0 |   |   |   |   |   |   |   |   |   |   |   |   |   |
| 19      | 22      | 1       | 0 | 0 | 0 | 0 |   |   |   |   |   |   |   |   |   |   |   |   |   |
| 22      | 23      | 1       | 0 | 0 | 0 | 0 |   |   |   |   |   |   |   |   |   |   |   |   |   |
| 24      | 25      | 1       | 0 | 0 | 0 | 0 |   |   |   |   |   |   |   |   |   |   |   |   |   |
| 24      | 26      | 1       | 0 | 0 | 0 | 0 |   |   |   |   |   |   |   |   |   |   |   |   |   |
| 24      | 27      | 1       | 0 | 0 | 0 | 0 |   |   |   |   |   |   |   |   |   |   |   |   |   |
| 27      | 28      | 1       | 0 | 0 | 0 | 0 |   |   |   |   |   |   |   |   |   |   |   |   |   |
| 29      | 30      | 1       | 0 | 0 | 0 | 0 |   |   |   |   |   |   |   |   |   |   |   |   |   |
| 29      | 31      | 1       | 0 | 0 | 0 | 0 |   |   |   |   |   |   |   |   |   |   |   |   |   |
| 29      | 32      | 1       | 0 | 0 | 0 | 0 |   |   |   |   |   |   |   |   |   |   |   |   |   |
| 29      | 76      | 1       | 0 | 0 | 0 | 0 |   |   |   |   |   |   |   |   |   |   |   |   |   |
| 32      | 33      | 1       | 0 | 0 | 0 | 0 |   |   |   |   |   |   |   |   |   |   |   |   |   |
| 33      | 34      | 1       | 0 | 0 | 0 | 0 |   |   |   |   |   |   |   |   |   |   |   |   |   |
| 33      | 40      | 2       | 0 | 0 | 0 | 0 |   |   |   |   |   |   |   |   |   |   |   |   |   |
| 34      | 35      | 1       | 0 | 0 | 0 | 0 |   |   |   |   |   |   |   |   |   |   |   |   |   |
| 34      | 36      | 1       | 0 | 0 | 0 | 0 |   |   |   |   |   |   |   |   |   |   |   |   |   |
| 34      | 37      | 1       | 0 | 0 | 0 | 0 |   |   |   |   |   |   |   |   |   |   |   |   |   |
| 37      | 38      | 1       | 0 | 0 | 0 | 0 |   |   |   |   |   |   |   |   |   |   |   |   |   |
| 37      | 39      | 1       | 0 | 0 | 0 | 0 |   |   |   |   |   |   |   |   |   |   |   |   |   |

|        |    |   |   |   |   |   |
|--------|----|---|---|---|---|---|
| 37     | 95 | 1 | 0 | 0 | 0 | 0 |
| 41     | 42 | 1 | 0 | 0 | 0 | 0 |
| 41     | 43 | 1 | 0 | 0 | 0 | 0 |
| 41     | 51 | 1 | 0 | 0 | 0 | 0 |
| 41     | 53 | 1 | 0 | 0 | 0 | 0 |
| 44     | 45 | 1 | 0 | 0 | 0 | 0 |
| 44     | 46 | 1 | 0 | 0 | 0 | 0 |
| 44     | 47 | 1 | 0 | 0 | 0 | 0 |
| 47     | 48 | 1 | 0 | 0 | 0 | 0 |
| 47     | 49 | 1 | 0 | 0 | 0 | 0 |
| 47     | 50 | 1 | 0 | 0 | 0 | 0 |
| 50     | 51 | 1 | 0 | 0 | 0 | 0 |
| 50     | 52 | 2 | 0 | 0 | 0 | 0 |
| 53     | 54 | 1 | 0 | 0 | 0 | 0 |
| 53     | 55 | 1 | 0 | 0 | 0 | 0 |
| 53     | 56 | 1 | 0 | 0 | 0 | 0 |
| 56     | 57 | 1 | 0 | 0 | 0 | 0 |
| 57     | 58 | 1 | 0 | 0 | 0 | 0 |
| 57     | 59 | 1 | 0 | 0 | 0 | 0 |
| 57     | 60 | 1 | 0 | 0 | 0 | 0 |
| 60     | 61 | 1 | 0 | 0 | 0 | 0 |
| 60     | 62 | 1 | 0 | 0 | 0 | 0 |
| 60     | 63 | 1 | 0 | 0 | 0 | 0 |
| 63     | 64 | 1 | 0 | 0 | 0 | 0 |
| 63     | 65 | 1 | 0 | 0 | 0 | 0 |
| 63     | 66 | 1 | 0 | 0 | 0 | 0 |
| 66     | 67 | 1 | 0 | 0 | 0 | 0 |
| 66     | 68 | 1 | 0 | 0 | 0 | 0 |
| 66     | 69 | 1 | 0 | 0 | 0 | 0 |
| 69     | 70 | 1 | 0 | 0 | 0 | 0 |
| 69     | 71 | 1 | 0 | 0 | 0 | 0 |
| 69     | 72 | 1 | 0 | 0 | 0 | 0 |
| 72     | 73 | 1 | 0 | 0 | 0 | 0 |
| 72     | 74 | 1 | 0 | 0 | 0 | 0 |
| 72     | 75 | 1 | 0 | 0 | 0 | 0 |
| 75     | 76 | 1 | 0 | 0 | 0 | 0 |
| 76     | 77 | 1 | 0 | 0 | 0 | 0 |
| 76     | 78 | 1 | 0 | 0 | 0 | 0 |
| 79     | 80 | 1 | 0 | 0 | 0 | 0 |
| 79     | 81 | 1 | 0 | 0 | 0 | 0 |
| 79     | 82 | 1 | 0 | 0 | 0 | 0 |
| 79     | 96 | 1 | 0 | 0 | 0 | 0 |
| 82     | 83 | 1 | 0 | 0 | 0 | 0 |
| 82     | 92 | 1 | 0 | 0 | 0 | 0 |
| 83     | 84 | 1 | 0 | 0 | 0 | 0 |
| 83     | 85 | 1 | 0 | 0 | 0 | 0 |
| 83     | 86 | 1 | 0 | 0 | 0 | 0 |
| 86     | 87 | 1 | 0 | 0 | 0 | 0 |
| 86     | 88 | 1 | 0 | 0 | 0 | 0 |
| 86     | 89 | 1 | 0 | 0 | 0 | 0 |
| 89     | 90 | 1 | 0 | 0 | 0 | 0 |
| 89     | 91 | 1 | 0 | 0 | 0 | 0 |
| 89     | 95 | 1 | 0 | 0 | 0 | 0 |
| 92     | 93 | 1 | 0 | 0 | 0 | 0 |
| 92     | 94 | 1 | 0 | 0 | 0 | 0 |
| 92101  | 1  | 0 | 0 | 0 | 0 | 0 |
| 95121  | 1  | 0 | 0 | 0 | 0 | 0 |
| 96     | 97 | 1 | 0 | 0 | 0 | 0 |
| 96     | 98 | 1 | 0 | 0 | 0 | 0 |
| 96     | 99 | 1 | 0 | 0 | 0 | 0 |
| 99100  | 1  | 0 | 0 | 0 | 0 | 0 |
| 101102 | 1  | 0 | 0 | 0 | 0 | 0 |
| 101103 | 1  | 0 | 0 | 0 | 0 | 0 |
| 101104 | 1  | 0 | 0 | 0 | 0 | 0 |
| 104105 | 1  | 0 | 0 | 0 | 0 | 0 |
| 106107 | 1  | 0 | 0 | 0 | 0 | 0 |
| 106108 | 1  | 0 | 0 | 0 | 0 | 0 |
| 106109 | 1  | 0 | 0 | 0 | 0 | 0 |
| 106153 | 1  | 0 | 0 | 0 | 0 | 0 |
| 109110 | 1  | 0 | 0 | 0 | 0 | 0 |
| 110111 | 1  | 0 | 0 | 0 | 0 | 0 |
| 110117 | 2  | 0 | 0 | 0 | 0 | 0 |
| 111112 | 1  | 0 | 0 | 0 | 0 | 0 |
| 111113 | 1  | 0 | 0 | 0 | 0 | 0 |
| 111114 | 1  | 0 | 0 | 0 | 0 | 0 |
| 114115 | 1  | 0 | 0 | 0 | 0 | 0 |
| 114116 | 1  | 0 | 0 | 0 | 0 | 0 |
| 114172 | 1  | 0 | 0 | 0 | 0 | 0 |
| 118119 | 1  | 0 | 0 | 0 | 0 | 0 |
| 118120 | 1  | 0 | 0 | 0 | 0 | 0 |
| 118128 | 1  | 0 | 0 | 0 | 0 | 0 |



|        |   |   |   |   |   |
|--------|---|---|---|---|---|
| 118130 | 1 | 0 | 0 | 0 | 0 |
| 121122 | 1 | 0 | 0 | 0 | 0 |
| 121123 | 1 | 0 | 0 | 0 | 0 |
| 121124 | 1 | 0 | 0 | 0 | 0 |
| 124125 | 1 | 0 | 0 | 0 | 0 |
| 124126 | 1 | 0 | 0 | 0 | 0 |
| 124127 | 1 | 0 | 0 | 0 | 0 |
| 127128 | 1 | 0 | 0 | 0 | 0 |
| 127129 | 2 | 0 | 0 | 0 | 0 |
| 130131 | 1 | 0 | 0 | 0 | 0 |
| 130132 | 1 | 0 | 0 | 0 | 0 |
| 130133 | 1 | 0 | 0 | 0 | 0 |
| 133134 | 1 | 0 | 0 | 0 | 0 |
| 134135 | 1 | 0 | 0 | 0 | 0 |
| 134136 | 1 | 0 | 0 | 0 | 0 |
| 134137 | 1 | 0 | 0 | 0 | 0 |
| 137138 | 1 | 0 | 0 | 0 | 0 |
| 137139 | 1 | 0 | 0 | 0 | 0 |
| 137140 | 1 | 0 | 0 | 0 | 0 |
| 140141 | 1 | 0 | 0 | 0 | 0 |
| 140142 | 1 | 0 | 0 | 0 | 0 |
| 140143 | 1 | 0 | 0 | 0 | 0 |
| 143144 | 1 | 0 | 0 | 0 | 0 |
| 143145 | 1 | 0 | 0 | 0 | 0 |
| 143146 | 1 | 0 | 0 | 0 | 0 |
| 146147 | 1 | 0 | 0 | 0 | 0 |
| 146148 | 1 | 0 | 0 | 0 | 0 |
| 146149 | 1 | 0 | 0 | 0 | 0 |
| 149150 | 1 | 0 | 0 | 0 | 0 |
| 149151 | 1 | 0 | 0 | 0 | 0 |
| 149152 | 1 | 0 | 0 | 0 | 0 |
| 152153 | 1 | 0 | 0 | 0 | 0 |
| 153154 | 1 | 0 | 0 | 0 | 0 |
| 153155 | 1 | 0 | 0 | 0 | 0 |
| 156157 | 1 | 0 | 0 | 0 | 0 |
| 156158 | 1 | 0 | 0 | 0 | 0 |
| 156159 | 1 | 0 | 0 | 0 | 0 |
| 156173 | 1 | 0 | 0 | 0 | 0 |
| 159160 | 1 | 0 | 0 | 0 | 0 |
| 159169 | 1 | 0 | 0 | 0 | 0 |
| 160161 | 1 | 0 | 0 | 0 | 0 |
| 160162 | 1 | 0 | 0 | 0 | 0 |
| 160163 | 1 | 0 | 0 | 0 | 0 |
| 163164 | 1 | 0 | 0 | 0 | 0 |
| 163165 | 1 | 0 | 0 | 0 | 0 |
| 163166 | 1 | 0 | 0 | 0 | 0 |
| 166167 | 1 | 0 | 0 | 0 | 0 |
| 166168 | 1 | 0 | 0 | 0 | 0 |
| 166172 | 1 | 0 | 0 | 0 | 0 |
| 169170 | 1 | 0 | 0 | 0 | 0 |
| 169171 | 1 | 0 | 0 | 0 | 0 |
| 169178 | 1 | 0 | 0 | 0 | 0 |
| 172198 | 1 | 0 | 0 | 0 | 0 |
| 173174 | 1 | 0 | 0 | 0 | 0 |
| 173175 | 1 | 0 | 0 | 0 | 0 |
| 173176 | 1 | 0 | 0 | 0 | 0 |
| 176177 | 1 | 0 | 0 | 0 | 0 |
| 178179 | 1 | 0 | 0 | 0 | 0 |
| 178180 | 1 | 0 | 0 | 0 | 0 |
| 178181 | 1 | 0 | 0 | 0 | 0 |
| 181182 | 1 | 0 | 0 | 0 | 0 |
| 183184 | 1 | 0 | 0 | 0 | 0 |
| 183185 | 1 | 0 | 0 | 0 | 0 |
| 183186 | 1 | 0 | 0 | 0 | 0 |
| 183230 | 1 | 0 | 0 | 0 | 0 |
| 186187 | 1 | 0 | 0 | 0 | 0 |
| 187188 | 1 | 0 | 0 | 0 | 0 |
| 187194 | 2 | 0 | 0 | 0 | 0 |
| 188189 | 1 | 0 | 0 | 0 | 0 |
| 188190 | 1 | 0 | 0 | 0 | 0 |
| 188191 | 1 | 0 | 0 | 0 | 0 |
| 191192 | 1 | 0 | 0 | 0 | 0 |
| 191193 | 1 | 0 | 0 | 0 | 0 |
| 191249 | 1 | 0 | 0 | 0 | 0 |
| 195196 | 1 | 0 | 0 | 0 | 0 |
| 195197 | 1 | 0 | 0 | 0 | 0 |
| 195205 | 1 | 0 | 0 | 0 | 0 |
| 195207 | 1 | 0 | 0 | 0 | 0 |
| 198199 | 1 | 0 | 0 | 0 | 0 |
| 198200 | 1 | 0 | 0 | 0 | 0 |
| 198201 | 1 | 0 | 0 | 0 | 0 |

|        |   |   |   |   |   |
|--------|---|---|---|---|---|
| 201202 | 1 | 0 | 0 | 0 | 0 |
| 201203 | 1 | 0 | 0 | 0 | 0 |
| 201204 | 1 | 0 | 0 | 0 | 0 |
| 204205 | 1 | 0 | 0 | 0 | 0 |
| 204206 | 2 | 0 | 0 | 0 | 0 |
| 207208 | 1 | 0 | 0 | 0 | 0 |
| 207209 | 1 | 0 | 0 | 0 | 0 |
| 207210 | 1 | 0 | 0 | 0 | 0 |
| 210211 | 1 | 0 | 0 | 0 | 0 |
| 211212 | 1 | 0 | 0 | 0 | 0 |
| 211213 | 1 | 0 | 0 | 0 | 0 |
| 211214 | 1 | 0 | 0 | 0 | 0 |
| 214215 | 1 | 0 | 0 | 0 | 0 |
| 214216 | 1 | 0 | 0 | 0 | 0 |
| 214217 | 1 | 0 | 0 | 0 | 0 |
| 217218 | 1 | 0 | 0 | 0 | 0 |
| 217219 | 1 | 0 | 0 | 0 | 0 |
| 217220 | 1 | 0 | 0 | 0 | 0 |
| 220221 | 1 | 0 | 0 | 0 | 0 |
| 220222 | 1 | 0 | 0 | 0 | 0 |
| 220223 | 1 | 0 | 0 | 0 | 0 |
| 223224 | 1 | 0 | 0 | 0 | 0 |
| 223225 | 1 | 0 | 0 | 0 | 0 |
| 223226 | 1 | 0 | 0 | 0 | 0 |
| 226227 | 1 | 0 | 0 | 0 | 0 |
| 226228 | 1 | 0 | 0 | 0 | 0 |
| 226229 | 1 | 0 | 0 | 0 | 0 |
| 229230 | 1 | 0 | 0 | 0 | 0 |
| 230231 | 1 | 0 | 0 | 0 | 0 |
| 230232 | 1 | 0 | 0 | 0 | 0 |
| 233234 | 1 | 0 | 0 | 0 | 0 |
| 233235 | 1 | 0 | 0 | 0 | 0 |
| 233236 | 1 | 0 | 0 | 0 | 0 |
| 233250 | 1 | 0 | 0 | 0 | 0 |
| 236237 | 1 | 0 | 0 | 0 | 0 |
| 236246 | 1 | 0 | 0 | 0 | 0 |
| 237238 | 1 | 0 | 0 | 0 | 0 |
| 237239 | 1 | 0 | 0 | 0 | 0 |
| 237240 | 1 | 0 | 0 | 0 | 0 |
| 240241 | 1 | 0 | 0 | 0 | 0 |
| 240242 | 1 | 0 | 0 | 0 | 0 |
| 240243 | 1 | 0 | 0 | 0 | 0 |
| 243244 | 1 | 0 | 0 | 0 | 0 |
| 243245 | 1 | 0 | 0 | 0 | 0 |
| 243249 | 1 | 0 | 0 | 0 | 0 |
| 246247 | 1 | 0 | 0 | 0 | 0 |
| 246248 | 1 | 0 | 0 | 0 | 0 |
| 246255 | 1 | 0 | 0 | 0 | 0 |
| 249275 | 1 | 0 | 0 | 0 | 0 |
| 250251 | 1 | 0 | 0 | 0 | 0 |
| 250252 | 1 | 0 | 0 | 0 | 0 |
| 250253 | 1 | 0 | 0 | 0 | 0 |
| 253254 | 1 | 0 | 0 | 0 | 0 |
| 255256 | 1 | 0 | 0 | 0 | 0 |
| 255257 | 1 | 0 | 0 | 0 | 0 |
| 255258 | 1 | 0 | 0 | 0 | 0 |
| 258259 | 1 | 0 | 0 | 0 | 0 |
| 260261 | 1 | 0 | 0 | 0 | 0 |
| 260262 | 1 | 0 | 0 | 0 | 0 |
| 260263 | 1 | 0 | 0 | 0 | 0 |
| 260307 | 1 | 0 | 0 | 0 | 0 |
| 263264 | 1 | 0 | 0 | 0 | 0 |
| 264265 | 1 | 0 | 0 | 0 | 0 |
| 264271 | 2 | 0 | 0 | 0 | 0 |
| 265266 | 1 | 0 | 0 | 0 | 0 |
| 265267 | 1 | 0 | 0 | 0 | 0 |
| 265268 | 1 | 0 | 0 | 0 | 0 |
| 268269 | 1 | 0 | 0 | 0 | 0 |
| 268270 | 1 | 0 | 0 | 0 | 0 |
| 268326 | 1 | 0 | 0 | 0 | 0 |
| 272273 | 1 | 0 | 0 | 0 | 0 |
| 272274 | 1 | 0 | 0 | 0 | 0 |
| 272282 | 1 | 0 | 0 | 0 | 0 |
| 272284 | 1 | 0 | 0 | 0 | 0 |
| 275276 | 1 | 0 | 0 | 0 | 0 |
| 275277 | 1 | 0 | 0 | 0 | 0 |
| 275278 | 1 | 0 | 0 | 0 | 0 |
| 278279 | 1 | 0 | 0 | 0 | 0 |
| 278280 | 1 | 0 | 0 | 0 | 0 |
| 278281 | 1 | 0 | 0 | 0 | 0 |
| 281282 | 1 | 0 | 0 | 0 | 0 |

|        |   |   |   |   |   |
|--------|---|---|---|---|---|
| 281283 | 2 | 0 | 0 | 0 | 0 |
| 284285 | 1 | 0 | 0 | 0 | 0 |
| 284286 | 1 | 0 | 0 | 0 | 0 |
| 284287 | 1 | 0 | 0 | 0 | 0 |
| 287288 | 1 | 0 | 0 | 0 | 0 |
| 288289 | 1 | 0 | 0 | 0 | 0 |
| 288290 | 1 | 0 | 0 | 0 | 0 |
| 288291 | 1 | 0 | 0 | 0 | 0 |
| 291292 | 1 | 0 | 0 | 0 | 0 |
| 291293 | 1 | 0 | 0 | 0 | 0 |
| 291294 | 1 | 0 | 0 | 0 | 0 |
| 294295 | 1 | 0 | 0 | 0 | 0 |
| 294296 | 1 | 0 | 0 | 0 | 0 |
| 294297 | 1 | 0 | 0 | 0 | 0 |
| 297298 | 1 | 0 | 0 | 0 | 0 |
| 297299 | 1 | 0 | 0 | 0 | 0 |
| 297300 | 1 | 0 | 0 | 0 | 0 |
| 300301 | 1 | 0 | 0 | 0 | 0 |
| 300302 | 1 | 0 | 0 | 0 | 0 |
| 300303 | 1 | 0 | 0 | 0 | 0 |
| 303304 | 1 | 0 | 0 | 0 | 0 |
| 303305 | 1 | 0 | 0 | 0 | 0 |
| 303306 | 1 | 0 | 0 | 0 | 0 |
| 306307 | 1 | 0 | 0 | 0 | 0 |
| 307308 | 1 | 0 | 0 | 0 | 0 |
| 307309 | 1 | 0 | 0 | 0 | 0 |
| 310311 | 1 | 0 | 0 | 0 | 0 |
| 310312 | 1 | 0 | 0 | 0 | 0 |
| 310313 | 1 | 0 | 0 | 0 | 0 |
| 310327 | 1 | 0 | 0 | 0 | 0 |
| 313314 | 1 | 0 | 0 | 0 | 0 |
| 313323 | 1 | 0 | 0 | 0 | 0 |
| 314315 | 1 | 0 | 0 | 0 | 0 |
| 314316 | 1 | 0 | 0 | 0 | 0 |
| 314317 | 1 | 0 | 0 | 0 | 0 |
| 317318 | 1 | 0 | 0 | 0 | 0 |
| 317319 | 1 | 0 | 0 | 0 | 0 |
| 317320 | 1 | 0 | 0 | 0 | 0 |
| 320321 | 1 | 0 | 0 | 0 | 0 |
| 320322 | 1 | 0 | 0 | 0 | 0 |
| 320326 | 1 | 0 | 0 | 0 | 0 |
| 323324 | 1 | 0 | 0 | 0 | 0 |
| 323325 | 1 | 0 | 0 | 0 | 0 |
| 323332 | 1 | 0 | 0 | 0 | 0 |
| 326352 | 1 | 0 | 0 | 0 | 0 |
| 327328 | 1 | 0 | 0 | 0 | 0 |
| 327329 | 1 | 0 | 0 | 0 | 0 |
| 327330 | 1 | 0 | 0 | 0 | 0 |
| 330331 | 1 | 0 | 0 | 0 | 0 |
| 332333 | 1 | 0 | 0 | 0 | 0 |
| 332334 | 1 | 0 | 0 | 0 | 0 |
| 332335 | 1 | 0 | 0 | 0 | 0 |
| 335336 | 1 | 0 | 0 | 0 | 0 |
| 337338 | 1 | 0 | 0 | 0 | 0 |
| 337339 | 1 | 0 | 0 | 0 | 0 |
| 337340 | 1 | 0 | 0 | 0 | 0 |
| 337384 | 1 | 0 | 0 | 0 | 0 |
| 340341 | 1 | 0 | 0 | 0 | 0 |
| 341342 | 1 | 0 | 0 | 0 | 0 |
| 341348 | 2 | 0 | 0 | 0 | 0 |
| 342343 | 1 | 0 | 0 | 0 | 0 |
| 342344 | 1 | 0 | 0 | 0 | 0 |
| 342345 | 1 | 0 | 0 | 0 | 0 |
| 345346 | 1 | 0 | 0 | 0 | 0 |
| 345347 | 1 | 0 | 0 | 0 | 0 |
| 345403 | 1 | 0 | 0 | 0 | 0 |
| 349350 | 1 | 0 | 0 | 0 | 0 |
| 349351 | 1 | 0 | 0 | 0 | 0 |
| 349359 | 1 | 0 | 0 | 0 | 0 |
| 349361 | 1 | 0 | 0 | 0 | 0 |
| 352353 | 1 | 0 | 0 | 0 | 0 |
| 352354 | 1 | 0 | 0 | 0 | 0 |
| 352355 | 1 | 0 | 0 | 0 | 0 |
| 355356 | 1 | 0 | 0 | 0 | 0 |
| 355357 | 1 | 0 | 0 | 0 | 0 |
| 355358 | 1 | 0 | 0 | 0 | 0 |
| 358359 | 1 | 0 | 0 | 0 | 0 |
| 358360 | 2 | 0 | 0 | 0 | 0 |
| 361362 | 1 | 0 | 0 | 0 | 0 |
| 361363 | 1 | 0 | 0 | 0 | 0 |
| 361364 | 1 | 0 | 0 | 0 | 0 |













|         |          |         |   |   |   |   |   |   |   |   |   |   |   |   |   |
|---------|----------|---------|---|---|---|---|---|---|---|---|---|---|---|---|---|
| 73.3390 | -17.1120 | 31.4650 | C | 0 | 0 | 0 | 0 | 0 | 0 | 0 | 0 | 0 | 0 | 0 | 0 |
| 72.8310 | -16.1600 | 31.5370 | H | 0 | 0 | 0 | 0 | 0 | 0 | 0 | 0 | 0 | 0 | 0 | 0 |
| 71.6870 | -18.1240 | 29.8740 | C | 0 | 0 | 0 | 0 | 0 | 0 | 0 | 0 | 0 | 0 | 0 | 0 |
| 71.2900 | -19.1450 | 29.8440 | H | 0 | 0 | 0 | 0 | 0 | 0 | 0 | 0 | 0 | 0 | 0 | 0 |
| 70.9500 | -17.4950 | 30.3880 | H | 0 | 0 | 0 | 0 | 0 | 0 | 0 | 0 | 0 | 0 | 0 | 0 |
| 71.9660 | -17.6040 | 28.4660 | C | 0 | 0 | 0 | 0 | 0 | 0 | 0 | 0 | 0 | 0 | 0 | 0 |
| 72.4410 | -16.6150 | 28.5260 | H | 0 | 0 | 0 | 0 | 0 | 0 | 0 | 0 | 0 | 0 | 0 | 0 |
| 72.6820 | -18.2660 | 27.9630 | H | 0 | 0 | 0 | 0 | 0 | 0 | 0 | 0 | 0 | 0 | 0 | 0 |
| 70.6750 | -17.5090 | 27.6510 | C | 0 | 0 | 0 | 0 | 0 | 0 | 0 | 0 | 0 | 0 | 0 | 0 |
| 70.2130 | -18.5010 | 27.5780 | H | 0 | 0 | 0 | 0 | 0 | 0 | 0 | 0 | 0 | 0 | 0 | 0 |
| 69.9760 | -16.8450 | 28.1710 | H | 0 | 0 | 0 | 0 | 0 | 0 | 0 | 0 | 0 | 0 | 0 | 0 |
| 70.9850 | -17.0040 | 26.3180 | N | 0 | 0 | 3 | 0 | 0 | 0 | 0 | 0 | 0 | 0 | 0 | 0 |
| 71.4540 | -16.0910 | 26.3900 | H | 0 | 0 | 0 | 0 | 0 | 0 | 0 | 0 | 0 | 0 | 0 | 0 |
| 1       | 2        | 1       | 0 | 0 | 0 | 0 | 0 | 0 | 0 | 0 | 0 | 0 | 0 | 0 | 0 |
| 1       | 7        | 1       | 0 | 0 | 0 | 0 | 0 | 0 | 0 | 0 | 0 | 0 | 0 | 0 | 0 |
| 1       | 9        | 1       | 0 | 0 | 0 | 0 | 0 | 0 | 0 | 0 | 0 | 0 | 0 | 0 | 0 |
| 2       | 3        | 1       | 0 | 0 | 0 | 0 | 0 | 0 | 0 | 0 | 0 | 0 | 0 | 0 | 0 |
| 2       | 4        | 2       | 0 | 0 | 0 | 0 | 0 | 0 | 0 | 0 | 0 | 0 | 0 | 0 | 0 |
| 4       | 5        | 1       | 0 | 0 | 0 | 0 | 0 | 0 | 0 | 0 | 0 | 0 | 0 | 0 | 0 |
| 4       | 6        | 1       | 0 | 0 | 0 | 0 | 0 | 0 | 0 | 0 | 0 | 0 | 0 | 0 | 0 |
| 6       | 7        | 2       | 0 | 0 | 0 | 0 | 0 | 0 | 0 | 0 | 0 | 0 | 0 | 0 | 0 |
| 7       | 8        | 1       | 0 | 0 | 0 | 0 | 0 | 0 | 0 | 0 | 0 | 0 | 0 | 0 | 0 |
| 9       | 10       | 1       | 0 | 0 | 0 | 0 | 0 | 0 | 0 | 0 | 0 | 0 | 0 | 0 | 0 |
| 9       | 11       | 1       | 0 | 0 | 0 | 0 | 0 | 0 | 0 | 0 | 0 | 0 | 0 | 0 | 0 |
| 9       | 12       | 1       | 0 | 0 | 0 | 0 | 0 | 0 | 0 | 0 | 0 | 0 | 0 | 0 | 0 |
| 12      | 13       | 1       | 0 | 0 | 0 | 0 | 0 | 0 | 0 | 0 | 0 | 0 | 0 | 0 | 0 |
| 12      | 14       | 1       | 0 | 0 | 0 | 0 | 0 | 0 | 0 | 0 | 0 | 0 | 0 | 0 | 0 |
| 12      | 15       | 1       | 0 | 0 | 0 | 0 | 0 | 0 | 0 | 0 | 0 | 0 | 0 | 0 | 0 |
| 15      | 16       | 1       | 0 | 0 | 0 | 0 | 0 | 0 | 0 | 0 | 0 | 0 | 0 | 0 | 0 |
| 15      | 17       | 1       | 0 | 0 | 0 | 0 | 0 | 0 | 0 | 0 | 0 | 0 | 0 | 0 | 0 |
| 15      | 18       | 1       | 0 | 0 | 0 | 0 | 0 | 0 | 0 | 0 | 0 | 0 | 0 | 0 | 0 |
| 18      | 19       | 1       | 0 | 0 | 0 | 0 | 0 | 0 | 0 | 0 | 0 | 0 | 0 | 0 | 0 |
| 18      | 35       | 1       | 0 | 0 | 0 | 0 | 0 | 0 | 0 | 0 | 0 | 0 | 0 | 0 | 0 |
| 20      | 21       | 1       | 0 | 0 | 0 | 0 | 0 | 0 | 0 | 0 | 0 | 0 | 0 | 0 | 0 |
| 20      | 22       | 1       | 0 | 0 | 0 | 0 | 0 | 0 | 0 | 0 | 0 | 0 | 0 | 0 | 0 |
| 20      | 23       | 1       | 0 | 0 | 0 | 0 | 0 | 0 | 0 | 0 | 0 | 0 | 0 | 0 | 0 |
| 20      | 67       | 1       | 0 | 0 | 0 | 0 | 0 | 0 | 0 | 0 | 0 | 0 | 0 | 0 | 0 |
| 23      | 24       | 1       | 0 | 0 | 0 | 0 | 0 | 0 | 0 | 0 | 0 | 0 | 0 | 0 | 0 |
| 24      | 25       | 1       | 0 | 0 | 0 | 0 | 0 | 0 | 0 | 0 | 0 | 0 | 0 | 0 | 0 |
| 24      | 31       | 2       | 0 | 0 | 0 | 0 | 0 | 0 | 0 | 0 | 0 | 0 | 0 | 0 | 0 |
| 25      | 26       | 1       | 0 | 0 | 0 | 0 | 0 | 0 | 0 | 0 | 0 | 0 | 0 | 0 | 0 |
| 25      | 27       | 1       | 0 | 0 | 0 | 0 | 0 | 0 | 0 | 0 | 0 | 0 | 0 | 0 | 0 |
| 25      | 28       | 1       | 0 | 0 | 0 | 0 | 0 | 0 | 0 | 0 | 0 | 0 | 0 | 0 | 0 |
| 28      | 29       | 1       | 0 | 0 | 0 | 0 | 0 | 0 | 0 | 0 | 0 | 0 | 0 | 0 | 0 |
| 28      | 30       | 1       | 0 | 0 | 0 | 0 | 0 | 0 | 0 | 0 | 0 | 0 | 0 | 0 | 0 |
| 28      | 87       | 1       | 0 | 0 | 0 | 0 | 0 | 0 | 0 | 0 | 0 | 0 | 0 | 0 | 0 |
| 32      | 33       | 1       | 0 | 0 | 0 | 0 | 0 | 0 | 0 | 0 | 0 | 0 | 0 | 0 | 0 |
| 32      | 34       | 1       | 0 | 0 | 0 | 0 | 0 | 0 | 0 | 0 | 0 | 0 | 0 | 0 | 0 |
| 32      | 42       | 1       | 0 | 0 | 0 | 0 | 0 | 0 | 0 | 0 | 0 | 0 | 0 | 0 | 0 |
| 32      | 44       | 1       | 0 | 0 | 0 | 0 | 0 | 0 | 0 | 0 | 0 | 0 | 0 | 0 | 0 |
| 35      | 36       | 1       | 0 | 0 | 0 | 0 | 0 | 0 | 0 | 0 | 0 | 0 | 0 | 0 | 0 |
| 35      | 37       | 1       | 0 | 0 | 0 | 0 | 0 | 0 | 0 | 0 | 0 | 0 | 0 | 0 | 0 |
| 35      | 38       | 1       | 0 | 0 | 0 | 0 | 0 | 0 | 0 | 0 | 0 | 0 | 0 | 0 | 0 |
| 38      | 39       | 1       | 0 | 0 | 0 | 0 | 0 | 0 | 0 | 0 | 0 | 0 | 0 | 0 | 0 |
| 38      | 40       | 1       | 0 | 0 | 0 | 0 | 0 | 0 | 0 | 0 | 0 | 0 | 0 | 0 | 0 |
| 38      | 41       | 1       | 0 | 0 | 0 | 0 | 0 | 0 | 0 | 0 | 0 | 0 | 0 | 0 | 0 |
| 41      | 42       | 1       | 0 | 0 | 0 | 0 | 0 | 0 | 0 | 0 | 0 | 0 | 0 | 0 | 0 |
| 41      | 43       | 2       | 0 | 0 | 0 | 0 | 0 | 0 | 0 | 0 | 0 | 0 | 0 | 0 | 0 |
| 44      | 45       | 1       | 0 | 0 | 0 | 0 | 0 | 0 | 0 | 0 | 0 | 0 | 0 | 0 | 0 |
| 44      | 46       | 1       | 0 | 0 | 0 | 0 | 0 | 0 | 0 | 0 | 0 | 0 | 0 | 0 | 0 |
| 44      | 47       | 1       | 0 | 0 | 0 | 0 | 0 | 0 | 0 | 0 | 0 | 0 | 0 | 0 | 0 |
| 47      | 48       | 1       | 0 | 0 | 0 | 0 | 0 | 0 | 0 | 0 | 0 | 0 | 0 | 0 | 0 |
| 48      | 49       | 1       | 0 | 0 | 0 | 0 | 0 | 0 | 0 | 0 | 0 | 0 | 0 | 0 | 0 |
| 48      | 50       | 1       | 0 | 0 | 0 | 0 | 0 | 0 | 0 | 0 | 0 | 0 | 0 | 0 | 0 |
| 48      | 51       | 1       | 0 | 0 | 0 | 0 | 0 | 0 | 0 | 0 | 0 | 0 | 0 | 0 | 0 |
| 51      | 52       | 1       | 0 | 0 | 0 | 0 | 0 | 0 | 0 | 0 | 0 | 0 | 0 | 0 | 0 |
| 51      | 53       | 1       | 0 | 0 | 0 | 0 | 0 | 0 | 0 | 0 | 0 | 0 | 0 | 0 | 0 |
| 51      | 54       | 1       | 0 | 0 | 0 | 0 | 0 | 0 | 0 | 0 | 0 | 0 | 0 | 0 | 0 |
| 54      | 55       | 1       | 0 | 0 | 0 | 0 | 0 | 0 | 0 | 0 | 0 | 0 | 0 | 0 | 0 |
| 54      | 56       | 1       | 0 | 0 | 0 | 0 | 0 | 0 | 0 | 0 | 0 | 0 | 0 | 0 | 0 |
| 54      | 57       | 1       | 0 | 0 | 0 | 0 | 0 | 0 | 0 | 0 | 0 | 0 | 0 | 0 | 0 |
| 57      | 58       | 1       | 0 | 0 | 0 | 0 | 0 | 0 | 0 | 0 | 0 | 0 | 0 | 0 | 0 |
| 57      | 59       | 1       | 0 | 0 | 0 | 0 | 0 | 0 | 0 | 0 | 0 | 0 | 0 | 0 | 0 |
| 57      | 60       | 1       | 0 | 0 | 0 | 0 | 0 | 0 | 0 | 0 | 0 | 0 | 0 | 0 | 0 |
| 60      | 61       | 1       | 0 | 0 | 0 | 0 | 0 | 0 | 0 | 0 | 0 | 0 | 0 | 0 | 0 |
| 60      | 62       | 1       | 0 | 0 | 0 | 0 | 0 | 0 | 0 | 0 | 0 | 0 | 0 | 0 | 0 |
| 60      | 63       | 1       | 0 | 0 | 0 | 0 | 0 | 0 | 0 | 0 | 0 | 0 | 0 | 0 | 0 |
| 63      | 64       | 1       | 0 | 0 | 0 | 0 | 0 | 0 | 0 | 0 | 0 | 0 | 0 | 0 | 0 |
| 63      | 65       | 1       | 0 | 0 | 0 | 0 | 0 | 0 | 0 | 0 | 0 | 0 | 0 | 0 | 0 |
| 63      | 66       | 1       | 0 | 0 | 0 | 0 | 0 | 0 | 0 | 0 | 0 | 0 | 0 | 0 | 0 |
| 66      | 67       | 1       | 0 | 0 | 0 | 0 | 0 | 0 | 0 | 0 | 0 | 0 | 0 | 0 | 0 |

|     |     |   |   |   |   |   |
|-----|-----|---|---|---|---|---|
| 67  | 68  | 1 | 0 | 0 | 0 | 0 |
| 67  | 69  | 1 | 0 | 0 | 0 | 0 |
| 70  | 71  | 1 | 0 | 0 | 0 | 0 |
| 70  | 76  | 1 | 0 | 0 | 0 | 0 |
| 70  | 78  | 1 | 0 | 0 | 0 | 0 |
| 71  | 72  | 1 | 0 | 0 | 0 | 0 |
| 71  | 73  | 2 | 0 | 0 | 0 | 0 |
| 73  | 74  | 1 | 0 | 0 | 0 | 0 |
| 73  | 75  | 1 | 0 | 0 | 0 | 0 |
| 75  | 76  | 2 | 0 | 0 | 0 | 0 |
| 76  | 77  | 1 | 0 | 0 | 0 | 0 |
| 78  | 79  | 1 | 0 | 0 | 0 | 0 |
| 78  | 80  | 1 | 0 | 0 | 0 | 0 |
| 78  | 81  | 1 | 0 | 0 | 0 | 0 |
| 81  | 82  | 1 | 0 | 0 | 0 | 0 |
| 81  | 83  | 1 | 0 | 0 | 0 | 0 |
| 81  | 84  | 1 | 0 | 0 | 0 | 0 |
| 84  | 85  | 1 | 0 | 0 | 0 | 0 |
| 84  | 86  | 1 | 0 | 0 | 0 | 0 |
| 84  | 87  | 1 | 0 | 0 | 0 | 0 |
| 87  | 103 | 1 | 0 | 0 | 0 | 0 |
| 88  | 89  | 1 | 0 | 0 | 0 | 0 |
| 88  | 90  | 1 | 0 | 0 | 0 | 0 |
| 88  | 91  | 1 | 0 | 0 | 0 | 0 |
| 88  | 135 | 1 | 0 | 0 | 0 | 0 |
| 91  | 92  | 1 | 0 | 0 | 0 | 0 |
| 92  | 93  | 1 | 0 | 0 | 0 | 0 |
| 92  | 99  | 2 | 0 | 0 | 0 | 0 |
| 93  | 94  | 1 | 0 | 0 | 0 | 0 |
| 93  | 95  | 1 | 0 | 0 | 0 | 0 |
| 93  | 96  | 1 | 0 | 0 | 0 | 0 |
| 96  | 97  | 1 | 0 | 0 | 0 | 0 |
| 96  | 98  | 1 | 0 | 0 | 0 | 0 |
| 96  | 155 | 1 | 0 | 0 | 0 | 0 |
| 100 | 101 | 1 | 0 | 0 | 0 | 0 |
| 100 | 102 | 1 | 0 | 0 | 0 | 0 |
| 100 | 110 | 1 | 0 | 0 | 0 | 0 |
| 100 | 112 | 1 | 0 | 0 | 0 | 0 |
| 103 | 104 | 1 | 0 | 0 | 0 | 0 |
| 103 | 105 | 1 | 0 | 0 | 0 | 0 |
| 103 | 106 | 1 | 0 | 0 | 0 | 0 |
| 106 | 107 | 1 | 0 | 0 | 0 | 0 |
| 106 | 108 | 1 | 0 | 0 | 0 | 0 |
| 106 | 109 | 1 | 0 | 0 | 0 | 0 |
| 109 | 110 | 1 | 0 | 0 | 0 | 0 |
| 109 | 111 | 2 | 0 | 0 | 0 | 0 |
| 112 | 113 | 1 | 0 | 0 | 0 | 0 |
| 112 | 114 | 1 | 0 | 0 | 0 | 0 |
| 112 | 115 | 1 | 0 | 0 | 0 | 0 |
| 115 | 116 | 1 | 0 | 0 | 0 | 0 |
| 116 | 117 | 1 | 0 | 0 | 0 | 0 |
| 116 | 118 | 1 | 0 | 0 | 0 | 0 |
| 116 | 119 | 1 | 0 | 0 | 0 | 0 |
| 119 | 120 | 1 | 0 | 0 | 0 | 0 |
| 119 | 121 | 1 | 0 | 0 | 0 | 0 |
| 119 | 122 | 1 | 0 | 0 | 0 | 0 |
| 122 | 123 | 1 | 0 | 0 | 0 | 0 |
| 122 | 124 | 1 | 0 | 0 | 0 | 0 |
| 122 | 125 | 1 | 0 | 0 | 0 | 0 |
| 125 | 126 | 1 | 0 | 0 | 0 | 0 |
| 125 | 127 | 1 | 0 | 0 | 0 | 0 |
| 125 | 128 | 1 | 0 | 0 | 0 | 0 |
| 128 | 129 | 1 | 0 | 0 | 0 | 0 |
| 128 | 130 | 1 | 0 | 0 | 0 | 0 |
| 128 | 131 | 1 | 0 | 0 | 0 | 0 |
| 131 | 132 | 1 | 0 | 0 | 0 | 0 |
| 131 | 133 | 1 | 0 | 0 | 0 | 0 |
| 131 | 134 | 1 | 0 | 0 | 0 | 0 |
| 134 | 135 | 1 | 0 | 0 | 0 | 0 |
| 135 | 136 | 1 | 0 | 0 | 0 | 0 |
| 135 | 137 | 1 | 0 | 0 | 0 | 0 |
| 138 | 139 | 1 | 0 | 0 | 0 | 0 |
| 138 | 144 | 1 | 0 | 0 | 0 | 0 |
| 138 | 146 | 1 | 0 | 0 | 0 | 0 |
| 139 | 140 | 1 | 0 | 0 | 0 | 0 |
| 139 | 141 | 2 | 0 | 0 | 0 | 0 |
| 141 | 142 | 1 | 0 | 0 | 0 | 0 |
| 141 | 143 | 1 | 0 | 0 | 0 | 0 |
| 143 | 144 | 2 | 0 | 0 | 0 | 0 |
| 144 | 145 | 1 | 0 | 0 | 0 | 0 |
| 146 | 147 | 1 | 0 | 0 | 0 | 0 |

|        |   |   |   |   |   |
|--------|---|---|---|---|---|
| 146148 | 1 | 0 | 0 | 0 | 0 |
| 146149 | 1 | 0 | 0 | 0 | 0 |
| 149150 | 1 | 0 | 0 | 0 | 0 |
| 149151 | 1 | 0 | 0 | 0 | 0 |
| 149152 | 1 | 0 | 0 | 0 | 0 |
| 152153 | 1 | 0 | 0 | 0 | 0 |
| 152154 | 1 | 0 | 0 | 0 | 0 |
| 152155 | 1 | 0 | 0 | 0 | 0 |
| 155171 | 1 | 0 | 0 | 0 | 0 |
| 156157 | 1 | 0 | 0 | 0 | 0 |
| 156158 | 1 | 0 | 0 | 0 | 0 |
| 156159 | 1 | 0 | 0 | 0 | 0 |
| 156203 | 1 | 0 | 0 | 0 | 0 |
| 159160 | 1 | 0 | 0 | 0 | 0 |
| 160161 | 1 | 0 | 0 | 0 | 0 |
| 160167 | 2 | 0 | 0 | 0 | 0 |
| 161162 | 1 | 0 | 0 | 0 | 0 |
| 161163 | 1 | 0 | 0 | 0 | 0 |
| 161164 | 1 | 0 | 0 | 0 | 0 |
| 164165 | 1 | 0 | 0 | 0 | 0 |
| 164166 | 1 | 0 | 0 | 0 | 0 |
| 164223 | 1 | 0 | 0 | 0 | 0 |
| 168169 | 1 | 0 | 0 | 0 | 0 |
| 168170 | 1 | 0 | 0 | 0 | 0 |
| 168178 | 1 | 0 | 0 | 0 | 0 |
| 168180 | 1 | 0 | 0 | 0 | 0 |
| 171172 | 1 | 0 | 0 | 0 | 0 |
| 171173 | 1 | 0 | 0 | 0 | 0 |
| 171174 | 1 | 0 | 0 | 0 | 0 |
| 174175 | 1 | 0 | 0 | 0 | 0 |
| 174176 | 1 | 0 | 0 | 0 | 0 |
| 174177 | 1 | 0 | 0 | 0 | 0 |
| 177178 | 1 | 0 | 0 | 0 | 0 |
| 177179 | 2 | 0 | 0 | 0 | 0 |
| 180181 | 1 | 0 | 0 | 0 | 0 |
| 180182 | 1 | 0 | 0 | 0 | 0 |
| 180183 | 1 | 0 | 0 | 0 | 0 |
| 183184 | 1 | 0 | 0 | 0 | 0 |
| 184185 | 1 | 0 | 0 | 0 | 0 |
| 184186 | 1 | 0 | 0 | 0 | 0 |
| 184187 | 1 | 0 | 0 | 0 | 0 |
| 187188 | 1 | 0 | 0 | 0 | 0 |
| 187189 | 1 | 0 | 0 | 0 | 0 |
| 187190 | 1 | 0 | 0 | 0 | 0 |
| 190191 | 1 | 0 | 0 | 0 | 0 |
| 190192 | 1 | 0 | 0 | 0 | 0 |
| 190193 | 1 | 0 | 0 | 0 | 0 |
| 193194 | 1 | 0 | 0 | 0 | 0 |
| 193195 | 1 | 0 | 0 | 0 | 0 |
| 193196 | 1 | 0 | 0 | 0 | 0 |
| 196197 | 1 | 0 | 0 | 0 | 0 |
| 196198 | 1 | 0 | 0 | 0 | 0 |
| 196199 | 1 | 0 | 0 | 0 | 0 |
| 199200 | 1 | 0 | 0 | 0 | 0 |
| 199201 | 1 | 0 | 0 | 0 | 0 |
| 199202 | 1 | 0 | 0 | 0 | 0 |
| 202203 | 1 | 0 | 0 | 0 | 0 |
| 203204 | 1 | 0 | 0 | 0 | 0 |
| 203205 | 1 | 0 | 0 | 0 | 0 |
| 206207 | 1 | 0 | 0 | 0 | 0 |
| 206212 | 1 | 0 | 0 | 0 | 0 |
| 206214 | 1 | 0 | 0 | 0 | 0 |
| 207208 | 1 | 0 | 0 | 0 | 0 |
| 207209 | 2 | 0 | 0 | 0 | 0 |
| 209210 | 1 | 0 | 0 | 0 | 0 |
| 209211 | 1 | 0 | 0 | 0 | 0 |
| 211212 | 2 | 0 | 0 | 0 | 0 |
| 212213 | 1 | 0 | 0 | 0 | 0 |
| 214215 | 1 | 0 | 0 | 0 | 0 |
| 214216 | 1 | 0 | 0 | 0 | 0 |
| 214217 | 1 | 0 | 0 | 0 | 0 |
| 217218 | 1 | 0 | 0 | 0 | 0 |
| 217219 | 1 | 0 | 0 | 0 | 0 |
| 217220 | 1 | 0 | 0 | 0 | 0 |
| 220221 | 1 | 0 | 0 | 0 | 0 |
| 220222 | 1 | 0 | 0 | 0 | 0 |
| 220223 | 1 | 0 | 0 | 0 | 0 |
| 223239 | 1 | 0 | 0 | 0 | 0 |
| 224225 | 1 | 0 | 0 | 0 | 0 |
| 224226 | 1 | 0 | 0 | 0 | 0 |
| 224227 | 1 | 0 | 0 | 0 | 0 |

|        |   |   |   |   |   |
|--------|---|---|---|---|---|
| 224271 | 1 | 0 | 0 | 0 | 0 |
| 227228 | 1 | 0 | 0 | 0 | 0 |
| 228229 | 1 | 0 | 0 | 0 | 0 |
| 228235 | 2 | 0 | 0 | 0 | 0 |
| 229230 | 1 | 0 | 0 | 0 | 0 |
| 229231 | 1 | 0 | 0 | 0 | 0 |
| 229232 | 1 | 0 | 0 | 0 | 0 |
| 232233 | 1 | 0 | 0 | 0 | 0 |
| 232234 | 1 | 0 | 0 | 0 | 0 |
| 232291 | 1 | 0 | 0 | 0 | 0 |
| 236237 | 1 | 0 | 0 | 0 | 0 |
| 236238 | 1 | 0 | 0 | 0 | 0 |
| 236246 | 1 | 0 | 0 | 0 | 0 |
| 236248 | 1 | 0 | 0 | 0 | 0 |
| 239240 | 1 | 0 | 0 | 0 | 0 |
| 239241 | 1 | 0 | 0 | 0 | 0 |
| 239242 | 1 | 0 | 0 | 0 | 0 |
| 242243 | 1 | 0 | 0 | 0 | 0 |
| 242244 | 1 | 0 | 0 | 0 | 0 |
| 242245 | 1 | 0 | 0 | 0 | 0 |
| 245246 | 1 | 0 | 0 | 0 | 0 |
| 245247 | 2 | 0 | 0 | 0 | 0 |
| 248249 | 1 | 0 | 0 | 0 | 0 |
| 248250 | 1 | 0 | 0 | 0 | 0 |
| 248251 | 1 | 0 | 0 | 0 | 0 |
| 251252 | 1 | 0 | 0 | 0 | 0 |
| 252253 | 1 | 0 | 0 | 0 | 0 |
| 252254 | 1 | 0 | 0 | 0 | 0 |
| 252255 | 1 | 0 | 0 | 0 | 0 |
| 255256 | 1 | 0 | 0 | 0 | 0 |
| 255257 | 1 | 0 | 0 | 0 | 0 |
| 255258 | 1 | 0 | 0 | 0 | 0 |
| 258259 | 1 | 0 | 0 | 0 | 0 |
| 258260 | 1 | 0 | 0 | 0 | 0 |
| 258261 | 1 | 0 | 0 | 0 | 0 |
| 261262 | 1 | 0 | 0 | 0 | 0 |
| 261263 | 1 | 0 | 0 | 0 | 0 |
| 261264 | 1 | 0 | 0 | 0 | 0 |
| 264265 | 1 | 0 | 0 | 0 | 0 |
| 264266 | 1 | 0 | 0 | 0 | 0 |
| 264267 | 1 | 0 | 0 | 0 | 0 |
| 267268 | 1 | 0 | 0 | 0 | 0 |
| 267269 | 1 | 0 | 0 | 0 | 0 |
| 267270 | 1 | 0 | 0 | 0 | 0 |
| 270271 | 1 | 0 | 0 | 0 | 0 |
| 271272 | 1 | 0 | 0 | 0 | 0 |
| 271273 | 1 | 0 | 0 | 0 | 0 |
| 274275 | 1 | 0 | 0 | 0 | 0 |
| 274280 | 1 | 0 | 0 | 0 | 0 |
| 274282 | 1 | 0 | 0 | 0 | 0 |
| 275276 | 1 | 0 | 0 | 0 | 0 |
| 275277 | 2 | 0 | 0 | 0 | 0 |
| 277278 | 1 | 0 | 0 | 0 | 0 |
| 277279 | 1 | 0 | 0 | 0 | 0 |
| 279280 | 2 | 0 | 0 | 0 | 0 |
| 280281 | 1 | 0 | 0 | 0 | 0 |
| 282283 | 1 | 0 | 0 | 0 | 0 |
| 282284 | 1 | 0 | 0 | 0 | 0 |
| 282285 | 1 | 0 | 0 | 0 | 0 |
| 285286 | 1 | 0 | 0 | 0 | 0 |
| 285287 | 1 | 0 | 0 | 0 | 0 |
| 285288 | 1 | 0 | 0 | 0 | 0 |
| 288289 | 1 | 0 | 0 | 0 | 0 |
| 288290 | 1 | 0 | 0 | 0 | 0 |
| 288291 | 1 | 0 | 0 | 0 | 0 |
| 291307 | 1 | 0 | 0 | 0 | 0 |
| 292293 | 1 | 0 | 0 | 0 | 0 |
| 292294 | 1 | 0 | 0 | 0 | 0 |
| 292295 | 1 | 0 | 0 | 0 | 0 |
| 292339 | 1 | 0 | 0 | 0 | 0 |
| 295296 | 1 | 0 | 0 | 0 | 0 |
| 296297 | 1 | 0 | 0 | 0 | 0 |
| 296303 | 2 | 0 | 0 | 0 | 0 |
| 297298 | 1 | 0 | 0 | 0 | 0 |
| 297299 | 1 | 0 | 0 | 0 | 0 |
| 297300 | 1 | 0 | 0 | 0 | 0 |
| 300301 | 1 | 0 | 0 | 0 | 0 |
| 300302 | 1 | 0 | 0 | 0 | 0 |
| 300359 | 1 | 0 | 0 | 0 | 0 |
| 304305 | 1 | 0 | 0 | 0 | 0 |
| 304306 | 1 | 0 | 0 | 0 | 0 |

```

304314 1 0 0 0 0
304316 1 0 0 0 0
307308 1 0 0 0 0
307309 1 0 0 0 0
307310 1 0 0 0 0
310311 1 0 0 0 0
310312 1 0 0 0 0
310313 1 0 0 0 0
313314 1 0 0 0 0
313315 2 0 0 0 0
316317 1 0 0 0 0
316318 1 0 0 0 0
316319 1 0 0 0 0
319320 1 0 0 0 0
320321 1 0 0 0 0
320322 1 0 0 0 0
320323 1 0 0 0 0
323324 1 0 0 0 0
323325 1 0 0 0 0
323326 1 0 0 0 0
326327 1 0 0 0 0
326328 1 0 0 0 0
326329 1 0 0 0 0
329330 1 0 0 0 0
329331 1 0 0 0 0
329332 1 0 0 0 0
332333 1 0 0 0 0
332334 1 0 0 0 0
332335 1 0 0 0 0
335336 1 0 0 0 0
335337 1 0 0 0 0
335338 1 0 0 0 0
338339 1 0 0 0 0
339340 1 0 0 0 0
339341 1 0 0 0 0
342343 1 0 0 0 0
342348 1 0 0 0 0
342350 1 0 0 0 0
343344 1 0 0 0 0
343345 2 0 0 0 0
345346 1 0 0 0 0
345347 1 0 0 0 0
347348 2 0 0 0 0
348349 1 0 0 0 0
350351 1 0 0 0 0
350352 1 0 0 0 0
350353 1 0 0 0 0
353354 1 0 0 0 0
353355 1 0 0 0 0
353356 1 0 0 0 0
356357 1 0 0 0 0
356358 1 0 0 0 0
356359 1 0 0 0 0
359360 1 0 0 0 0

```

```

M END
> <NAME>
U93_12

```

```

$$$$
U94_12
MOE2012 3D

```

```

342347 0 0 1 0 0 0 0 0999 V2000
 34.8770 0.2220 -31.9750 N 0 0 0 0 0 0 0 0 0 0 0 0 0 0 0 0
 34.0000 -0.4500 -31.1720 C 0 0 0 0 0 0 0 0 0 0 0 0 0 0 0 0
 32.9290 -0.3190 -31.2310 H 0 0 0 0 0 0 0 0 0 0 0 0 0 0 0 0
 34.7920 -1.2470 -30.3780 C 0 0 0 0 0 0 0 0 0 0 0 0 0 0 0 0
 34.4760 -1.9380 -29.6080 H 0 0 0 0 0 0 0 0 0 0 0 0 0 0 0 0
 36.1200 -1.0740 -30.6770 N 0 0 0 0 0 0 0 0 0 0 0 0 0 0 0 0
 36.1390 -0.1820 -31.6420 C 0 0 0 0 0 0 0 0 0 0 0 0 0 0 0 0
 37.0270 0.2000 -32.1290 H 0 0 0 0 0 0 0 0 0 0 0 0 0 0 0 0
 34.5350 1.1830 -33.0040 C 0 0 0 0 0 0 0 0 0 0 0 0 0 0 0 0
 35.2680 1.0710 -33.8130 H 0 0 0 0 0 0 0 0 0 0 0 0 0 0 0 0
 33.5540 0.9010 -33.4050 H 0 0 0 0 0 0 0 0 0 0 0 0 0 0 0 0
 34.5180 2.6210 -32.4730 C 0 0 0 0 0 0 0 0 0 0 0 0 0 0 0 0
 33.7870 2.6880 -31.6600 H 0 0 0 0 0 0 0 0 0 0 0 0 0 0 0 0
 35.5010 2.8720 -32.0570 H 0 0 0 0 0 0 0 0 0 0 0 0 0 0 0 0
 34.1740 3.5540 -33.5520 N 0 0 0 3 0 0 0 0 0 0 0 0 0 0 0 0
 34.8480 3.4510 -34.3120 H 0 0 0 0 0 0 0 0 0 0 0 0 0 0 0 0
 36.7940 9.5290 -19.6420 C 0 0 0 0 0 0 0 0 0 0 0 0 0 0 0 0
 37.8390 9.6580 -19.9520 H 0 0 0 0 0 0 0 0 0 0 0 0 0 0 0 0

```











|    |    |   |   |   |   |   |
|----|----|---|---|---|---|---|
| 1  | 2  | 1 | 0 | 0 | 0 | 0 |
| 1  | 7  | 1 | 0 | 0 | 0 | 0 |
| 1  | 9  | 1 | 0 | 0 | 0 | 0 |
| 2  | 3  | 1 | 0 | 0 | 0 | 0 |
| 2  | 4  | 2 | 0 | 0 | 0 | 0 |
| 4  | 5  | 1 | 0 | 0 | 0 | 0 |
| 4  | 6  | 1 | 0 | 0 | 0 | 0 |
| 6  | 7  | 2 | 0 | 0 | 0 | 0 |
| 7  | 8  | 1 | 0 | 0 | 0 | 0 |
| 9  | 10 | 1 | 0 | 0 | 0 | 0 |
| 9  | 11 | 1 | 0 | 0 | 0 | 0 |
| 9  | 12 | 1 | 0 | 0 | 0 | 0 |
| 12 | 13 | 1 | 0 | 0 | 0 | 0 |
| 12 | 14 | 1 | 0 | 0 | 0 | 0 |
| 12 | 15 | 1 | 0 | 0 | 0 | 0 |
| 15 | 16 | 1 | 0 | 0 | 0 | 0 |
| 15 | 32 | 1 | 0 | 0 | 0 | 0 |
| 17 | 18 | 1 | 0 | 0 | 0 | 0 |
| 17 | 19 | 1 | 0 | 0 | 0 | 0 |
| 17 | 20 | 1 | 0 | 0 | 0 | 0 |
| 17 | 64 | 1 | 0 | 0 | 0 | 0 |
| 20 | 21 | 1 | 0 | 0 | 0 | 0 |
| 21 | 22 | 1 | 0 | 0 | 0 | 0 |
| 21 | 28 | 2 | 0 | 0 | 0 | 0 |
| 22 | 23 | 1 | 0 | 0 | 0 | 0 |
| 22 | 24 | 1 | 0 | 0 | 0 | 0 |
| 22 | 25 | 1 | 0 | 0 | 0 | 0 |
| 25 | 26 | 1 | 0 | 0 | 0 | 0 |
| 25 | 27 | 1 | 0 | 0 | 0 | 0 |
| 25 | 81 | 1 | 0 | 0 | 0 | 0 |
| 29 | 30 | 1 | 0 | 0 | 0 | 0 |
| 29 | 31 | 1 | 0 | 0 | 0 | 0 |
| 29 | 39 | 1 | 0 | 0 | 0 | 0 |
| 29 | 41 | 1 | 0 | 0 | 0 | 0 |
| 32 | 33 | 1 | 0 | 0 | 0 | 0 |
| 32 | 34 | 1 | 0 | 0 | 0 | 0 |
| 32 | 35 | 1 | 0 | 0 | 0 | 0 |
| 35 | 36 | 1 | 0 | 0 | 0 | 0 |
| 35 | 37 | 1 | 0 | 0 | 0 | 0 |
| 35 | 38 | 1 | 0 | 0 | 0 | 0 |
| 38 | 39 | 1 | 0 | 0 | 0 | 0 |
| 38 | 40 | 2 | 0 | 0 | 0 | 0 |
| 41 | 42 | 1 | 0 | 0 | 0 | 0 |
| 41 | 43 | 1 | 0 | 0 | 0 | 0 |
| 41 | 44 | 1 | 0 | 0 | 0 | 0 |
| 44 | 45 | 1 | 0 | 0 | 0 | 0 |
| 45 | 46 | 1 | 0 | 0 | 0 | 0 |
| 45 | 47 | 1 | 0 | 0 | 0 | 0 |
| 45 | 48 | 1 | 0 | 0 | 0 | 0 |
| 48 | 49 | 1 | 0 | 0 | 0 | 0 |
| 48 | 50 | 1 | 0 | 0 | 0 | 0 |
| 48 | 51 | 1 | 0 | 0 | 0 | 0 |
| 51 | 52 | 1 | 0 | 0 | 0 | 0 |
| 51 | 53 | 1 | 0 | 0 | 0 | 0 |
| 51 | 54 | 1 | 0 | 0 | 0 | 0 |
| 54 | 55 | 1 | 0 | 0 | 0 | 0 |
| 54 | 56 | 1 | 0 | 0 | 0 | 0 |
| 54 | 57 | 1 | 0 | 0 | 0 | 0 |
| 57 | 58 | 1 | 0 | 0 | 0 | 0 |
| 57 | 59 | 1 | 0 | 0 | 0 | 0 |
| 57 | 60 | 1 | 0 | 0 | 0 | 0 |
| 60 | 61 | 1 | 0 | 0 | 0 | 0 |
| 60 | 62 | 1 | 0 | 0 | 0 | 0 |
| 60 | 63 | 1 | 0 | 0 | 0 | 0 |
| 63 | 64 | 1 | 0 | 0 | 0 | 0 |
| 64 | 65 | 1 | 0 | 0 | 0 | 0 |
| 64 | 66 | 1 | 0 | 0 | 0 | 0 |
| 67 | 68 | 1 | 0 | 0 | 0 | 0 |
| 67 | 73 | 1 | 0 | 0 | 0 | 0 |
| 67 | 75 | 1 | 0 | 0 | 0 | 0 |
| 68 | 69 | 1 | 0 | 0 | 0 | 0 |
| 68 | 70 | 2 | 0 | 0 | 0 | 0 |
| 70 | 71 | 1 | 0 | 0 | 0 | 0 |
| 70 | 72 | 1 | 0 | 0 | 0 | 0 |
| 72 | 73 | 2 | 0 | 0 | 0 | 0 |
| 73 | 74 | 1 | 0 | 0 | 0 | 0 |
| 75 | 76 | 1 | 0 | 0 | 0 | 0 |
| 75 | 77 | 1 | 0 | 0 | 0 | 0 |
| 75 | 78 | 1 | 0 | 0 | 0 | 0 |
| 78 | 79 | 1 | 0 | 0 | 0 | 0 |
| 78 | 80 | 1 | 0 | 0 | 0 | 0 |

|     |     |   |   |   |   |   |
|-----|-----|---|---|---|---|---|
| 78  | 81  | 1 | 0 | 0 | 0 | 0 |
| 81  | 97  | 1 | 0 | 0 | 0 | 0 |
| 82  | 83  | 1 | 0 | 0 | 0 | 0 |
| 82  | 84  | 1 | 0 | 0 | 0 | 0 |
| 82  | 85  | 1 | 0 | 0 | 0 | 0 |
| 82  | 129 | 1 | 0 | 0 | 0 | 0 |
| 85  | 86  | 1 | 0 | 0 | 0 | 0 |
| 86  | 87  | 1 | 0 | 0 | 0 | 0 |
| 86  | 93  | 2 | 0 | 0 | 0 | 0 |
| 87  | 88  | 1 | 0 | 0 | 0 | 0 |
| 87  | 89  | 1 | 0 | 0 | 0 | 0 |
| 87  | 90  | 1 | 0 | 0 | 0 | 0 |
| 90  | 91  | 1 | 0 | 0 | 0 | 0 |
| 90  | 92  | 1 | 0 | 0 | 0 | 0 |
| 90  | 146 | 1 | 0 | 0 | 0 | 0 |
| 94  | 95  | 1 | 0 | 0 | 0 | 0 |
| 94  | 96  | 1 | 0 | 0 | 0 | 0 |
| 94  | 104 | 1 | 0 | 0 | 0 | 0 |
| 94  | 106 | 1 | 0 | 0 | 0 | 0 |
| 97  | 98  | 1 | 0 | 0 | 0 | 0 |
| 97  | 99  | 1 | 0 | 0 | 0 | 0 |
| 97  | 100 | 1 | 0 | 0 | 0 | 0 |
| 100 | 101 | 1 | 0 | 0 | 0 | 0 |
| 100 | 102 | 1 | 0 | 0 | 0 | 0 |
| 100 | 103 | 1 | 0 | 0 | 0 | 0 |
| 103 | 104 | 1 | 0 | 0 | 0 | 0 |
| 103 | 105 | 2 | 0 | 0 | 0 | 0 |
| 106 | 107 | 1 | 0 | 0 | 0 | 0 |
| 106 | 108 | 1 | 0 | 0 | 0 | 0 |
| 106 | 109 | 1 | 0 | 0 | 0 | 0 |
| 109 | 110 | 1 | 0 | 0 | 0 | 0 |
| 110 | 111 | 1 | 0 | 0 | 0 | 0 |
| 110 | 112 | 1 | 0 | 0 | 0 | 0 |
| 110 | 113 | 1 | 0 | 0 | 0 | 0 |
| 113 | 114 | 1 | 0 | 0 | 0 | 0 |
| 113 | 115 | 1 | 0 | 0 | 0 | 0 |
| 113 | 116 | 1 | 0 | 0 | 0 | 0 |
| 116 | 117 | 1 | 0 | 0 | 0 | 0 |
| 116 | 118 | 1 | 0 | 0 | 0 | 0 |
| 116 | 119 | 1 | 0 | 0 | 0 | 0 |
| 119 | 120 | 1 | 0 | 0 | 0 | 0 |
| 119 | 121 | 1 | 0 | 0 | 0 | 0 |
| 119 | 122 | 1 | 0 | 0 | 0 | 0 |
| 122 | 123 | 1 | 0 | 0 | 0 | 0 |
| 122 | 124 | 1 | 0 | 0 | 0 | 0 |
| 122 | 125 | 1 | 0 | 0 | 0 | 0 |
| 125 | 126 | 1 | 0 | 0 | 0 | 0 |
| 125 | 127 | 1 | 0 | 0 | 0 | 0 |
| 125 | 128 | 1 | 0 | 0 | 0 | 0 |
| 128 | 129 | 1 | 0 | 0 | 0 | 0 |
| 129 | 130 | 1 | 0 | 0 | 0 | 0 |
| 129 | 131 | 1 | 0 | 0 | 0 | 0 |
| 132 | 133 | 1 | 0 | 0 | 0 | 0 |
| 132 | 138 | 1 | 0 | 0 | 0 | 0 |
| 132 | 140 | 1 | 0 | 0 | 0 | 0 |
| 133 | 134 | 1 | 0 | 0 | 0 | 0 |
| 133 | 135 | 2 | 0 | 0 | 0 | 0 |
| 135 | 136 | 1 | 0 | 0 | 0 | 0 |
| 135 | 137 | 1 | 0 | 0 | 0 | 0 |
| 137 | 138 | 2 | 0 | 0 | 0 | 0 |
| 138 | 139 | 1 | 0 | 0 | 0 | 0 |
| 140 | 141 | 1 | 0 | 0 | 0 | 0 |
| 140 | 142 | 1 | 0 | 0 | 0 | 0 |
| 140 | 143 | 1 | 0 | 0 | 0 | 0 |
| 143 | 144 | 1 | 0 | 0 | 0 | 0 |
| 143 | 145 | 1 | 0 | 0 | 0 | 0 |
| 143 | 146 | 1 | 0 | 0 | 0 | 0 |
| 146 | 162 | 1 | 0 | 0 | 0 | 0 |
| 147 | 148 | 1 | 0 | 0 | 0 | 0 |
| 147 | 149 | 1 | 0 | 0 | 0 | 0 |
| 147 | 150 | 1 | 0 | 0 | 0 | 0 |
| 147 | 194 | 1 | 0 | 0 | 0 | 0 |
| 150 | 151 | 1 | 0 | 0 | 0 | 0 |
| 151 | 152 | 1 | 0 | 0 | 0 | 0 |
| 151 | 158 | 2 | 0 | 0 | 0 | 0 |
| 152 | 153 | 1 | 0 | 0 | 0 | 0 |
| 152 | 154 | 1 | 0 | 0 | 0 | 0 |
| 152 | 155 | 1 | 0 | 0 | 0 | 0 |
| 155 | 156 | 1 | 0 | 0 | 0 | 0 |
| 155 | 157 | 1 | 0 | 0 | 0 | 0 |
| 155 | 211 | 1 | 0 | 0 | 0 | 0 |

|        |   |   |   |   |   |
|--------|---|---|---|---|---|
| 159160 | 1 | 0 | 0 | 0 | 0 |
| 159161 | 1 | 0 | 0 | 0 | 0 |
| 159169 | 1 | 0 | 0 | 0 | 0 |
| 159171 | 1 | 0 | 0 | 0 | 0 |
| 162163 | 1 | 0 | 0 | 0 | 0 |
| 162164 | 1 | 0 | 0 | 0 | 0 |
| 162165 | 1 | 0 | 0 | 0 | 0 |
| 165166 | 1 | 0 | 0 | 0 | 0 |
| 165167 | 1 | 0 | 0 | 0 | 0 |
| 165168 | 1 | 0 | 0 | 0 | 0 |
| 168169 | 1 | 0 | 0 | 0 | 0 |
| 168170 | 2 | 0 | 0 | 0 | 0 |
| 171172 | 1 | 0 | 0 | 0 | 0 |
| 171173 | 1 | 0 | 0 | 0 | 0 |
| 171174 | 1 | 0 | 0 | 0 | 0 |
| 174175 | 1 | 0 | 0 | 0 | 0 |
| 175176 | 1 | 0 | 0 | 0 | 0 |
| 175177 | 1 | 0 | 0 | 0 | 0 |
| 175178 | 1 | 0 | 0 | 0 | 0 |
| 178179 | 1 | 0 | 0 | 0 | 0 |
| 178180 | 1 | 0 | 0 | 0 | 0 |
| 178181 | 1 | 0 | 0 | 0 | 0 |
| 181182 | 1 | 0 | 0 | 0 | 0 |
| 181183 | 1 | 0 | 0 | 0 | 0 |
| 181184 | 1 | 0 | 0 | 0 | 0 |
| 184185 | 1 | 0 | 0 | 0 | 0 |
| 184186 | 1 | 0 | 0 | 0 | 0 |
| 184187 | 1 | 0 | 0 | 0 | 0 |
| 187188 | 1 | 0 | 0 | 0 | 0 |
| 187189 | 1 | 0 | 0 | 0 | 0 |
| 187190 | 1 | 0 | 0 | 0 | 0 |
| 190191 | 1 | 0 | 0 | 0 | 0 |
| 190192 | 1 | 0 | 0 | 0 | 0 |
| 190193 | 1 | 0 | 0 | 0 | 0 |
| 193194 | 1 | 0 | 0 | 0 | 0 |
| 194195 | 1 | 0 | 0 | 0 | 0 |
| 194196 | 1 | 0 | 0 | 0 | 0 |
| 197198 | 1 | 0 | 0 | 0 | 0 |
| 197203 | 1 | 0 | 0 | 0 | 0 |
| 197205 | 1 | 0 | 0 | 0 | 0 |
| 198199 | 1 | 0 | 0 | 0 | 0 |
| 198200 | 2 | 0 | 0 | 0 | 0 |
| 200201 | 1 | 0 | 0 | 0 | 0 |
| 200202 | 1 | 0 | 0 | 0 | 0 |
| 202203 | 2 | 0 | 0 | 0 | 0 |
| 203204 | 1 | 0 | 0 | 0 | 0 |
| 205206 | 1 | 0 | 0 | 0 | 0 |
| 205207 | 1 | 0 | 0 | 0 | 0 |
| 205208 | 1 | 0 | 0 | 0 | 0 |
| 208209 | 1 | 0 | 0 | 0 | 0 |
| 208210 | 1 | 0 | 0 | 0 | 0 |
| 208211 | 1 | 0 | 0 | 0 | 0 |
| 211227 | 1 | 0 | 0 | 0 | 0 |
| 212213 | 1 | 0 | 0 | 0 | 0 |
| 212214 | 1 | 0 | 0 | 0 | 0 |
| 212215 | 1 | 0 | 0 | 0 | 0 |
| 212259 | 1 | 0 | 0 | 0 | 0 |
| 215216 | 1 | 0 | 0 | 0 | 0 |
| 216217 | 1 | 0 | 0 | 0 | 0 |
| 216223 | 2 | 0 | 0 | 0 | 0 |
| 217218 | 1 | 0 | 0 | 0 | 0 |
| 217219 | 1 | 0 | 0 | 0 | 0 |
| 217220 | 1 | 0 | 0 | 0 | 0 |
| 220221 | 1 | 0 | 0 | 0 | 0 |
| 220222 | 1 | 0 | 0 | 0 | 0 |
| 220276 | 1 | 0 | 0 | 0 | 0 |
| 224225 | 1 | 0 | 0 | 0 | 0 |
| 224226 | 1 | 0 | 0 | 0 | 0 |
| 224234 | 1 | 0 | 0 | 0 | 0 |
| 224236 | 1 | 0 | 0 | 0 | 0 |
| 227228 | 1 | 0 | 0 | 0 | 0 |
| 227229 | 1 | 0 | 0 | 0 | 0 |
| 227230 | 1 | 0 | 0 | 0 | 0 |
| 230231 | 1 | 0 | 0 | 0 | 0 |
| 230232 | 1 | 0 | 0 | 0 | 0 |
| 230233 | 1 | 0 | 0 | 0 | 0 |
| 233234 | 1 | 0 | 0 | 0 | 0 |
| 233235 | 2 | 0 | 0 | 0 | 0 |
| 236237 | 1 | 0 | 0 | 0 | 0 |
| 236238 | 1 | 0 | 0 | 0 | 0 |
| 236239 | 1 | 0 | 0 | 0 | 0 |

|        |   |   |   |   |   |
|--------|---|---|---|---|---|
| 239240 | 1 | 0 | 0 | 0 | 0 |
| 240241 | 1 | 0 | 0 | 0 | 0 |
| 240242 | 1 | 0 | 0 | 0 | 0 |
| 240243 | 1 | 0 | 0 | 0 | 0 |
| 243244 | 1 | 0 | 0 | 0 | 0 |
| 243245 | 1 | 0 | 0 | 0 | 0 |
| 243246 | 1 | 0 | 0 | 0 | 0 |
| 246247 | 1 | 0 | 0 | 0 | 0 |
| 246248 | 1 | 0 | 0 | 0 | 0 |
| 246249 | 1 | 0 | 0 | 0 | 0 |
| 249250 | 1 | 0 | 0 | 0 | 0 |
| 249251 | 1 | 0 | 0 | 0 | 0 |
| 249252 | 1 | 0 | 0 | 0 | 0 |
| 252253 | 1 | 0 | 0 | 0 | 0 |
| 252254 | 1 | 0 | 0 | 0 | 0 |
| 252255 | 1 | 0 | 0 | 0 | 0 |
| 255256 | 1 | 0 | 0 | 0 | 0 |
| 255257 | 1 | 0 | 0 | 0 | 0 |
| 255258 | 1 | 0 | 0 | 0 | 0 |
| 258259 | 1 | 0 | 0 | 0 | 0 |
| 259260 | 1 | 0 | 0 | 0 | 0 |
| 259261 | 1 | 0 | 0 | 0 | 0 |
| 262263 | 1 | 0 | 0 | 0 | 0 |
| 262268 | 1 | 0 | 0 | 0 | 0 |
| 262270 | 1 | 0 | 0 | 0 | 0 |
| 263264 | 1 | 0 | 0 | 0 | 0 |
| 263265 | 2 | 0 | 0 | 0 | 0 |
| 265266 | 1 | 0 | 0 | 0 | 0 |
| 265267 | 1 | 0 | 0 | 0 | 0 |
| 267268 | 2 | 0 | 0 | 0 | 0 |
| 268269 | 1 | 0 | 0 | 0 | 0 |
| 270271 | 1 | 0 | 0 | 0 | 0 |
| 270272 | 1 | 0 | 0 | 0 | 0 |
| 270273 | 1 | 0 | 0 | 0 | 0 |
| 273274 | 1 | 0 | 0 | 0 | 0 |
| 273275 | 1 | 0 | 0 | 0 | 0 |
| 273276 | 1 | 0 | 0 | 0 | 0 |
| 276292 | 1 | 0 | 0 | 0 | 0 |
| 277278 | 1 | 0 | 0 | 0 | 0 |
| 277279 | 1 | 0 | 0 | 0 | 0 |
| 277280 | 1 | 0 | 0 | 0 | 0 |
| 277324 | 1 | 0 | 0 | 0 | 0 |
| 280281 | 1 | 0 | 0 | 0 | 0 |
| 281282 | 1 | 0 | 0 | 0 | 0 |
| 281288 | 2 | 0 | 0 | 0 | 0 |
| 282283 | 1 | 0 | 0 | 0 | 0 |
| 282284 | 1 | 0 | 0 | 0 | 0 |
| 282285 | 1 | 0 | 0 | 0 | 0 |
| 285286 | 1 | 0 | 0 | 0 | 0 |
| 285287 | 1 | 0 | 0 | 0 | 0 |
| 285341 | 1 | 0 | 0 | 0 | 0 |
| 289290 | 1 | 0 | 0 | 0 | 0 |
| 289291 | 1 | 0 | 0 | 0 | 0 |
| 289299 | 1 | 0 | 0 | 0 | 0 |
| 289301 | 1 | 0 | 0 | 0 | 0 |
| 292293 | 1 | 0 | 0 | 0 | 0 |
| 292294 | 1 | 0 | 0 | 0 | 0 |
| 292295 | 1 | 0 | 0 | 0 | 0 |
| 295296 | 1 | 0 | 0 | 0 | 0 |
| 295297 | 1 | 0 | 0 | 0 | 0 |
| 295298 | 1 | 0 | 0 | 0 | 0 |
| 298299 | 1 | 0 | 0 | 0 | 0 |
| 298300 | 2 | 0 | 0 | 0 | 0 |
| 301302 | 1 | 0 | 0 | 0 | 0 |
| 301303 | 1 | 0 | 0 | 0 | 0 |
| 301304 | 1 | 0 | 0 | 0 | 0 |
| 304305 | 1 | 0 | 0 | 0 | 0 |
| 305306 | 1 | 0 | 0 | 0 | 0 |
| 305307 | 1 | 0 | 0 | 0 | 0 |
| 305308 | 1 | 0 | 0 | 0 | 0 |
| 308309 | 1 | 0 | 0 | 0 | 0 |
| 308310 | 1 | 0 | 0 | 0 | 0 |
| 308311 | 1 | 0 | 0 | 0 | 0 |
| 311312 | 1 | 0 | 0 | 0 | 0 |
| 311313 | 1 | 0 | 0 | 0 | 0 |
| 311314 | 1 | 0 | 0 | 0 | 0 |
| 314315 | 1 | 0 | 0 | 0 | 0 |
| 314316 | 1 | 0 | 0 | 0 | 0 |
| 314317 | 1 | 0 | 0 | 0 | 0 |
| 317318 | 1 | 0 | 0 | 0 | 0 |
| 317319 | 1 | 0 | 0 | 0 | 0 |

|        |   |   |   |   |   |
|--------|---|---|---|---|---|
| 317320 | 1 | 0 | 0 | 0 | 0 |
| 320321 | 1 | 0 | 0 | 0 | 0 |
| 320322 | 1 | 0 | 0 | 0 | 0 |
| 320323 | 1 | 0 | 0 | 0 | 0 |
| 323324 | 1 | 0 | 0 | 0 | 0 |
| 324325 | 1 | 0 | 0 | 0 | 0 |
| 324326 | 1 | 0 | 0 | 0 | 0 |
| 327328 | 1 | 0 | 0 | 0 | 0 |
| 327333 | 1 | 0 | 0 | 0 | 0 |
| 327335 | 1 | 0 | 0 | 0 | 0 |
| 328329 | 1 | 0 | 0 | 0 | 0 |
| 328330 | 2 | 0 | 0 | 0 | 0 |
| 330331 | 1 | 0 | 0 | 0 | 0 |
| 330332 | 1 | 0 | 0 | 0 | 0 |
| 332333 | 2 | 0 | 0 | 0 | 0 |
| 333334 | 1 | 0 | 0 | 0 | 0 |
| 335336 | 1 | 0 | 0 | 0 | 0 |
| 335337 | 1 | 0 | 0 | 0 | 0 |
| 335338 | 1 | 0 | 0 | 0 | 0 |
| 338339 | 1 | 0 | 0 | 0 | 0 |
| 338340 | 1 | 0 | 0 | 0 | 0 |
| 338341 | 1 | 0 | 0 | 0 | 0 |
| 341342 | 1 | 0 | 0 | 0 | 0 |

M END  
> <NAME>  
U94\_12

\$\$\$\$
